# Supplementary material for: Re-mining serum proteomics data reveals extensive post-translational modifications upon Zika and dengue infection
Source: Royal Society of Chemistry journal article supplement (doi:10.1039/d2mo00258b), 2023-02-15
Supplement: d2mo00258b2.xlsx [file d2mo00258b2.xlsx]

## Sheet: Table_S1
Table S1: Identification - 1,806 modifications in 1,652 peptides from 251 proteins
Category	UniProt_ID	Protein_Description	Peptide_Sequence	Number_Modifications_per_peptide
Acetyl	P69905	Hemoglobin subunit alpha	_V[Acetyl (Protein N-term)]LSPADK	1
Acetyl	P68871	Hemoglobin subunit beta	_V[Acetyl (Protein N-term)]HLTPEEK	1
Acetyl	P00915	Carbonic anhydrase 1	_A[Acetyl (Protein N-term)]SPDWGYDDKNGPEQWSK	1
Acetyl	P04040	Catalase	_A[Acetyl (Protein N-term)]DSRDPASDQMQHWK	1
Acetyl	A0A1B0GU86;Q03154;Q03154-2;Q03154-3;Q03154-4	Aminoacylase-1;Aminoacylase-1;Isoform 2 of Aminoacylase-1;Isoform 3 of Aminoacylase-1;Isoform 4 of Aminoacylase-1	_T[Acetyl (Protein N-term)]SKGPEEEHPSVTLFR	1
Acetyl	P07737	Profilin-1	_A[Acetyl (Protein N-term)]GWNAYIDNLM[Oxidation (M)]ADGTC[Carbamidomethyl (C)]QDAAIVGYK	3
Acetyl	P62328	Thymosin beta-4	_S[Acetyl (Protein N-term)]DKPDM[Oxidation (M)]AEIEKFDK	2
Acetyl	P62937	Peptidyl-prolyl cis-trans isomerase A	_V[Acetyl (Protein N-term)]NPTVFFDIAVDGEPLGR	1
Acetyl	P60709	Actin, cytoplasmic 1	_D[Acetyl (Protein N-term)]DDIAALVVDNGSGMC[Carbamidomethyl (C)]K	2
Acetyl	P62328	Thymosin beta-4	_S[Acetyl (Protein N-term)]DKPDM[Oxidation (M)]AEIEK	2
Acetyl	P62258	14-3-3 protein epsilon	_M[Acetyl (Protein N-term)]DDREDLVYQAK	1
Acetyl	P00739	Haptoglobin-related protein	_S[Acetyl (Protein N-term)]DLGAVISLLLWGR	1
Acetyl	P00352;Q5SYQ7;Q5SYQ8;Q5SYQ9	Retinal dehydrogenase 1;Retinal dehydrogenase 1 (Fragment);Retinal dehydrogenase 1 (Fragment);Retinal dehydrogenase 1	_S[Acetyl (Protein N-term)]SSGTPDLPVLLTDLK	1
Acetyl	A0A0B4J2B5	Immunoglobulin heavy variable 3/OR16-9 (non-functional) (Fragment)	_E[Acetyl (Protein N-term)]VQLVESGGGLVQPGGSLR	1
Acetyl	P00918	Carbonic anhydrase 2	_S[Acetyl (Protein N-term)]HHWGYGK	1
Acetyl	P07737	Profilin-1	_A[Acetyl (Protein N-term)]GWNAYIDNLMADGTC[Carbamidomethyl (C)]QDAAIVGYK	2
Acetyl	P62328	Thymosin beta-4	_S[Acetyl (Protein N-term)]DKPDMAEIEK	1
Acetyl	P69905	Hemoglobin subunit alpha	_V[Acetyl (Protein N-term)]LSPADKTNVK	1
Acetyl	A0A087WWU8;P06753-2;P06753-5	Tropomyosin alpha-3 chain;Isoform 2 of Tropomyosin alpha-3 chain;Isoform 5 of Tropomyosin alpha-3 chain	_A[Acetyl (Protein N-term)]GITTIEAVKR	1
Acetyl	P62937	Peptidyl-prolyl cis-trans isomerase A	_M[Acetyl (Protein N-term)]VNPTVFFDIAVDGEPLGR	1
Acetyl	A0A087WWU8;P06753-2;P06753-5	Tropomyosin alpha-3 chain;Isoform 2 of Tropomyosin alpha-3 chain;Isoform 5 of Tropomyosin alpha-3 chain	_A[Acetyl (Protein N-term)]GITTIEAVK	1
Acetyl	P23528	Cofilin-1	_A[Acetyl (Protein N-term)]SGVAVSDGVIK	1
Acetyl	P07737	Profilin-1	_A[Acetyl (Protein N-term)]GWNAYIDNLMADGTC[Carbamidomethyl (C)]QDAAIVGYKDSPSVWAAVPGK	2
Acetyl	P62328	Thymosin beta-4	_S[Acetyl (Protein N-term)]DKPDMAEIEKFDK	1
Carboxy	P01766	Immunoglobulin heavy variable 3-13	_AGD[Carboxy]TAVYYC[Carbamidomethyl (C)]AR	2
Carboxy	A0A0B4J1X8	Immunoglobulin heavy variable 3-43	_DNSK[Carboxy]NSLYLQMNSLR	1
Carboxy	P06310	Immunoglobulin kappa variable 2-30	_D[Carboxy]SGVPDRFSGSGSGTDFTLK	1
Carboxy	P02768	Serum albumin	_RPC[Carbamidomethyl (C)]FSALE[Carboxy]VDETYVPK	2
Carboxy	P04196	Histidine-rich glycoprotein	_HHFPRHPNVFGFC[Carbamidomethyl (C)]RAD[Carboxy]LFYDVEALDLESPK	2
Carboxy	P01619	Immunoglobulin kappa variable 3-20	_ASQSVSSSYLAW[Carboxy]YQQKPGQAPR	1
Carboxy	P0C0L5	Complement C4-B	_LHLE[Carboxy]TD[Carboxy]SLALVALGALD[Carboxy]TALYAAGSK	3
Carboxy	Q14376;Q14376-2;Q5QPP1;Q5QPP3;Q5QPP4	UDP-glucose 4-epimerase;Isoform 2 of UDP-glucose 4-epimerase;UDP-glucose 4-epimerase (Fragment);UDP-glucose 4-epimerase (Fragment);UDP-glucose 4-epimerase (Fragment)	_TW[Carboxy]NAVLLR	1
Carboxy	A0A0C4DH36	Immunoglobulin heavy variable 3-38 (non-functional) (Fragment)	_AE[Carboxy]GTAVYYC[Carbamidomethyl (C)]AR	2
Carboxy	A0A0C4DH38	Immunoglobulin heavy variable 5-51	_ASD[Carboxy]TAMYYC[Carbamidomethyl (C)]AR	2
Carboxy	P01701	Immunoglobulin lambda variable 1-51	_VTISC[Carbamidomethyl (C)]SGSSSNIGNNYVSW[Carboxy]YQQLPGTAPK	2
Carboxy	P00734	Prothrombin	_YTAC[Carbamidomethyl (C)]E[Carboxy]TAR	2
Carboxy	P02768	Serum albumin	_SHC[Carbamidomethyl (C)]IAEVENDE[Carboxy]MPADLPSLAADFVESK	2
Carboxy	A0A0C4DH25	Immunoglobulin kappa variable 3D-20	_LLIYD[Carboxy]ASSR	1
Carboxy	A0A0C4DH68	Immunoglobulin kappa variable 2-24	_SSQSLVHSDGNTYLSW[Carboxy]LQQRPGQPPR	1
Carboxy	A0A0C4DH68	Immunoglobulin kappa variable 2-24	_LLIYK[Carboxy]ISNR	1
Carboxy	Q05682	Caldesmon	_HAMQETK[Carboxy]IK[Carboxy]	2
Carboxy	P02768	Serum albumin	_QNC[Carbamidomethyl (C)]ELFE[Carboxy]QLGEYK	2
Carboxy	P02768	Serum albumin	_K[Carboxy]QTALVELVK	1
Carboxy	P02768	Serum albumin	_VTK[Carboxy]C[Carbamidomethyl (C)]C[Carbamidomethyl (C)]TESLVNR	3
Carboxy	A0A0B4J2B5	Immunoglobulin heavy variable 3/OR16-9 (non-functional) (Fragment)	_EVQLVE[Carboxy]SGGGLVQPGGSLR	1
Carboxy	A0A0G2JRQ6	Uncharacterized protein (Fragment)	_LLLYAASRLE[Carboxy]SGVPSR	1
Carboxy	A0A0G2JMI3	Immunoglobulin heavy variable 1-69-2	_VTITAD[Carboxy]TSTDTAYMELSSLR	1
Carboxy	P02768	Serum albumin	_PLLEKSHC[Carbamidomethyl (C)]IAEVEND[Carboxy]E[Carboxy]MPADLPSLAADFVESK	3
Carboxy	P01857	Immunoglobulin heavy constant gamma 1	_VVSVLTVLHQD[Carboxy]WLNGKEYK	1
Carboxy	P02763	Alpha-1-acid glycoprotein 1	_YVGGQE[Carboxy]HFAHLLILR	1
Carboxy	P01871	Immunoglobulin heavy constant mu	_GVALHRPD[Carboxy]VYLLPPAR	1
Carboxy	P04433	Immunoglobulin kappa variable 3-11	_LLIYD[Carboxy]ASNRATGIPAR	1
Carboxy	P01766	Immunoglobulin heavy variable 3-13	_NSLYLQMNSLRAGD[Carboxy]TAVYYC[Carbamidomethyl (C)]AR	2
Carboxy	P02768	Serum albumin	_MPC[Carbamidomethyl (C)]AED[Carboxy]YLSVVLNQLC[Carbamidomethyl (C)]VLHEK	3
Carboxy	A0A075B6R2	Immunoglobulin heavy variable 4-4	_LSSVTAAD[Carboxy]TAVYYC[Carbamidomethyl (C)]AR	2
Carboxy	A0A0B4J2B5	Immunoglobulin heavy variable 3/OR16-9 (non-functional) (Fragment)	_E[Carboxy]VQLVE[Carboxy]SGGGLVQPGGSLR	2
Carboxy	A0A0G2JMB2	Immunoglobulin heavy constant alpha 2 (Fragment)	_QE[Carboxy]PSQGTTTFAVTSILR	1
Carboxy	P0C0L5	Complement C4-B	_LTSLSD[Carboxy]RYVSHFETEGPHVLLYFDSVPTSR	1
Carboxy	A0A0B4J2D9;P0DP09	Immunoglobulin kappa variable 1D-13;Immunoglobulin kappa variable 1-13	_ASQGISSALAW[Carboxy]YQQKPGK	1
Carboxy	P09871	Complement C1s subcomponent	_VE[Carboxy]D[Carboxy]PE[Carboxy]STLFGSVIR	3
Carboxy	P04430	Immunoglobulin kappa variable 1-16	_ASQGISNYLAW[Carboxy]FQQKPGKAPK	1
Carboxy	P08571	Monocyte differentiation antigen CD14	_NTGME[Carboxy]TPTGVC[Carbamidomethyl (C)]AALAAAGVQPHSLD[Carboxy]LSHNSLR	3
Carboxy	A0A0C4DH68	Immunoglobulin kappa variable 2-24	_FSGVPD[Carboxy]RFSGSGAGTDFTLK	1
Carboxy	P04211	Immunoglobulin lambda variable 7-43	_FSGSLLGGK[Carboxy]	1
Carboxy	A0A0G2JRQ6	Uncharacterized protein (Fragment)	_ASQGISNSLAW[Carboxy]YQQKPGKAPK	1
Carboxy	A0A075B6H7	Immunoglobulin kappa variable 3-7 (non-functional) (Fragment)	_E[Carboxy]IVMTQSPPTLSLSPGER	1
Carboxy	A0A0B4J2D9;P0DP09	Immunoglobulin kappa variable 1D-13;Immunoglobulin kappa variable 1-13	_ASQGISSALAW[Carboxy]YQQK	1
Carboxy	P01782	Immunoglobulin heavy variable 3-9	_LSC[Carbamidomethyl (C)]AASGFTFDD[Carboxy]YAMHWVR	2
Carboxy	P04433	Immunoglobulin kappa variable 3-11	_ASQSVSSYLAW[Carboxy]YQQKPGQAPR	1
Carboxy	P02768	Serum albumin	_QE[Carboxy]PERNEC[Carbamidomethyl (C)]FLQHKDDNPNLPR	2
Carboxy	A0A0C4DH34	Immunoglobulin heavy variable 4-28	_LSSVTAVD[Carboxy]TAVYYC[Carbamidomethyl (C)]AR	2
Carboxy	A0A0J9YY99	Uncharacterized protein (Fragment)	_AE[Carboxy]DTAVYYC[Carbamidomethyl (C)]AK	2
Carboxy	A0A0A0MT36	Immunoglobulin kappa variable 6D-21	_LLIK[Carboxy]YASQSISGVPSR	1
Carboxy	P01857	Immunoglobulin heavy constant gamma 1	_THTC[Carbamidomethyl (C)]PPC[Carbamidomethyl (C)]PAPE[Carboxy]LLGGPSVFLFPPKPK	3
Carboxy	P02787	Serotransferrin	_D[Carboxy]SAHGFLKVPPR	1
Carboxy	P01762	Immunoglobulin heavy variable 3-11	_NSLYLQMNSLRAE[Carboxy]DTAVYYC[Carbamidomethyl (C)]AR	2
Carboxy	A0A075B7E8	Immunoglobulin heavy variable 3/OR16-13 (non-functional) (Fragment)	_DNAK[Carboxy]NTLYLQMNSLR	1
Carboxy	P01860	Immunoglobulin heavy constant gamma 3	_W[Carboxy]YVDGVEVHNAK	1
Carboxy	A0A0C4DH73;P01611	Immunoglobulin kappa variable 1-12;Immunoglobulin kappa variable 1D-12	_ASQGISSW[Carboxy]LAWYQQKPGKAPK	1
Carboxy	P01602	Immunoglobulin kappa variable 1-5	_ASQSISSW[Carboxy]LAWYQQKPGKAPK	1
Carboxy	P02768	Serum albumin	_SLHTLFGD[Carboxy]K[Carboxy]LC[Carbamidomethyl (C)]TVATLR	3
Carboxy	P02751;P02751-15;P02751-3;P02751-7	Fibronectin;Isoform 15 of Fibronectin;Isoform 3 of Fibronectin;Isoform 7 of Fibronectin	_ITGYIIK[Carboxy]YEKPGSPPR	1
Carboxy	A0A0B4J1V0	Immunoglobulin heavy variable 3-15	_TDGGTTD[Carboxy]YAAPVK	1
Carboxy	A0A0J9YVT0;P0DP02	Immunoglobulin heavy variable 3-33 (Fragment);Immunoglobulin heavy variable 3-30-3	_AE[Carboxy]DTAVYYC[Carbamidomethyl (C)]AR	2
Carboxy	P02768	Serum albumin	_VFDEFKPLVEE[Carboxy]PQNLIK[Carboxy]QNC[Carbamidomethyl (C)]ELFEQLGEYK	3
Carboxy	A0A0A0MS15	Immunoglobulin heavy variable 3-49	_DDSK[Carboxy]SIAYLQMNSLK	1
Carboxy	A0A075B6K0	Immunoglobulin lambda variable 3-16	_ITC[Carbamidomethyl (C)]SGE[Carboxy]ALPK	2
Carboxy	P01762	Immunoglobulin heavy variable 3-11	_NSLYLQMNSLRAED[Carboxy]TAVYYC[Carbamidomethyl (C)]AR	2
Carboxy	P01860	Immunoglobulin heavy constant gamma 3	_GFYPSDIAVEWESSGQPE[Carboxy]NNYNTTPPMLDSDGSFFLYSK	1
Carboxy	P01857	Immunoglobulin heavy constant gamma 1	_FNW[Carboxy]YVDGVEVHNAK	1
Carboxy	A0A0B4J1V6	Immunoglobulin heavy variable 3-73	_LSC[Carbamidomethyl (C)]AASGFTFSGSAMHW[Carboxy]VR	2
Carboxy	P02768	Serum albumin	_RMPC[Carbamidomethyl (C)]AED[Carboxy]YLSVVLNQLC[Carbamidomethyl (C)]VLHEKTPVSDR	3
Carboxy	P01619	Immunoglobulin kappa variable 3-20	_FSGSGSGTD[Carboxy]FTLTISR	1
Carboxy	P00738	Haptoglobin	_LRTEGDGVYTLNNE[Carboxy]KQWINK	1
Carboxy	P02787	Serotransferrin	_LC[Carbamidomethyl (C)]MGSGLNLC[Carbamidomethyl (C)]E[Carboxy]PNNKEGYYGYTGAFR	3
Carboxy	P02768	Serum albumin	_LK[Carboxy]C[Carbamidomethyl (C)]ASLQK	2
Carboxy	P02790	Hemopexin	_GDK[Carboxy]VW[Carboxy]VYPPEKK	2
Carboxy	A0A075B6K0	Immunoglobulin lambda variable 3-16	_ITC[Carbamidomethyl (C)]SGE[Carboxy]ALPKK	2
Carboxy	A0A0B4J2D9;P0DP09	Immunoglobulin kappa variable 1D-13;Immunoglobulin kappa variable 1-13	_ASQGISSALAW[Carboxy]YQQKPGKAPK	1
Carboxy	A0A0C4DH29	Immunoglobulin heavy variable 1-3	_DTSASTAYME[Carboxy]LSSLR	1
Carboxy	A0A0C4DH38	Immunoglobulin heavy variable 5-51	_ASD[Carboxy]TAM[Oxidation (M)]YYC[Carbamidomethyl (C)]AR	3
Carboxy	P01602	Immunoglobulin kappa variable 1-5	_LLIYKASSLE[Carboxy]SGVPSR	1
Carboxy	P01705	Immunoglobulin lambda variable 2-23	_LMIYEGSK[Carboxy]RPSGVSNR	1
Carboxy	P01834	Immunoglobulin kappa constant	_TVAAPSVFIFPPSDEQLK[Carboxy]SGTASVVC[Carbamidomethyl (C)]LLNNFYPR	2
Carboxy	P01876	Immunoglobulin heavy constant alpha 1	_NFPPSQDASGDLYTTSSQLTLPATQC[Carbamidomethyl (C)]LAGK[Carboxy]	2
Carboxy	P04211	Immunoglobulin lambda variable 7-43	_HSW[Carboxy]TPARFSGSLLGGK	1
Carboxy	P00734	Prothrombin	_DKLAAC[Carbamidomethyl (C)]LE[Carboxy]GNC[Carbamidomethyl (C)]AEGLGTNYR	3
Carboxy	P02765	Alpha-2-HS-glycoprotein	_AQLVPLPPSTYVE[Carboxy]FTVSGTD[Carboxy]C[Carbamidomethyl (C)]VAK	3
Carboxy	P02768	Serum albumin	_SHC[Carbamidomethyl (C)]IAEVENDEMPAD[Carboxy]LPSLAADFVESKDVC[Carbamidomethyl (C)]K	3
Carboxy	A0A0A0MS15	Immunoglobulin heavy variable 3-49	_SK[Carboxy]AYGGTTEYAASVK	1
Carboxy	P02787	Serotransferrin	_W[Carboxy]C[Carbamidomethyl (C)]ALSHHER	2
Carboxy	P01619	Immunoglobulin kappa variable 3-20	_ATGIPD[Carboxy]RFSGSGSGTDFTLTISR	1
Carboxy	P01861	Immunoglobulin heavy constant gamma 4	_WQE[Carboxy]GNVFSC[Carbamidomethyl (C)]SVM[Oxidation (M)]HEALHNHYTQK	3
Carboxy	A0A0C4DH35	Immunoglobulin heavy variable 3-35 (non-functional) (Fragment)	_AE[Carboxy]DTAVYYC[Carbamidomethyl (C)]VR	2
Carboxy	P02768	Serum albumin	_K[Carboxy]VPQVSTPTLVEVSR	1
Formyl	A0A0B4J2B5	Immunoglobulin heavy variable 3/OR16-9 (non-functional) (Fragment)	_E[Formyl (Protein N-term)]VQLVESGGGLVQPGGSLR	1
Formyl	P69905	Hemoglobin subunit alpha	_V[Formyl (Protein N-term)]LSPADKTNVK	1
Formyl	P01834	Immunoglobulin kappa constant	_R[Formyl (Protein N-term)]TVAAPSVFIFPPSDEQLKSGTASVVC[Carbamidomethyl (C)]LLNNFYPR	2
Hex	P02768	Serum albumin	_VT[Hex]KC[Carbamidomethyl (C)]C[Carbamidomethyl (C)]TESLVNR	3
Hex	P01023	Alpha-2-macroglobulin	_LLIYAVLPTGDVIGDSAKYDVEN[Hex]C[Carbamidomethyl (C)]LANKVDLSFSPSQSLPASHAHLR	2
Hex	P02787	Serotransferrin	_KDS[Hex]GFQMNQLR	1
Hex	P02768	Serum albumin	_VFDEFKPLVEEPQN[Hex]LIKQNC[Carbamidomethyl (C)]ELFEQLGEYK	2
Hex	P01857	Immunoglobulin heavy constant gamma 1	_VSNK[Hex]ALPAPIEK	1
Hex	P02768	Serum albumin	_RHPYFY[Hex]APELLFFAKR	1
Hex	P04196	Histidine-rich glycoprotein	_SSTTKPPFKPHGS[HexNAc]R	1
Hex	P02768	Serum albumin	_N[HexNAc]YAEAKDVFLGM[Oxidation (M)]FLYEYAR	2
Hex	P02768	Serum albumin	_YK[Hex]AAFTEC[Carbamidomethyl (C)]C[Carbamidomethyl (C)]QAADK	3
Hex	P04114	Apolipoprotein B-100	_IK[Hex]GVISIPR	1
Hex	P02768	Serum albumin	_AFK[Hex]AWAVAR	1
Hex	P01834	Immunoglobulin kappa constant	_HKVY[Hex]AC[Carbamidomethyl (C)]EVTHQGLSSPVTK	2
Hex	P01834	Immunoglobulin kappa constant	_ADYEK[Hex]HKVYAC[Carbamidomethyl (C)]EVTHQGLSSPVTK	2
Hex	P02768	Serum albumin	_LDELRDEGK[Hex]ASSAK	1
Hex	Q9UJJ9	N-acetylglucosamine-1-phosphotransferase subunit gamma	_VELAC[Carbamidomethyl (C)]GK[Hex(2)]	2
Hex	P01857	Immunoglobulin heavy constant gamma 1	_T[Hex]PEVT[Hex]C[Carbamidomethyl (C)]VVVDVSHEDPEVK	3
Hex	P02768	Serum albumin	_MPC[Carbamidomethyl (C)]AEDYLSVVLN[Hex]QLC[Carbamidomethyl (C)]VLHEKTPVSDR	3
Hex	P02768	Serum albumin	_SHC[Carbamidomethyl (C)]IAEVEN[Hex]DEMPADLPSLAADFVESKDVC[Carbamidomethyl (C)]K	3
Hex	P02768	Serum albumin	_VFDEFKPLVEEPQNLIKQN[Hex]C[Carbamidomethyl (C)]ELFEQLGEYK	2
Hex	P02768	Serum albumin	_EFNAETFT[HexN]FHADIC[Carbamidomethyl (C)]TLSEKER	2
Hex	P01834	Immunoglobulin kappa constant	_ADYEKHKVY[Hex]AC[Carbamidomethyl (C)]EVTHQGLSSPVTK	2
Hex	P02768	Serum albumin	_QN[Hex]C[Carbamidomethyl (C)]ELFEQLGEYK	2
Hex	P02768	Serum albumin	_RMPC[Carbamidomethyl (C)]AEDYLSVVLN[Hex]QLC[Carbamidomethyl (C)]VLHEKTPVSDR	3
Hex	P02768	Serum albumin	_NYAEAK[Hex]DVFLGMFLYEYAR	1
Hex	P02768	Serum albumin	_EC[Carbamidomethyl (C)]C[Carbamidomethyl (C)]EK[Hex]PLLEK	3
Hex	P04114	Apolipoprotein B-100	_LR[Hex(2)]T[HexN]SSFALN[HexN]LPTLPEVKFPEVDVLTK	3
Hex	P01834	Immunoglobulin kappa constant	_VQWKVDNALQS[Hex]GNSQESVTEQDSK	1
Hex	P02768	Serum albumin	_KVPQVST[Hex]PTLVEVSR	1
Hex	P01834	Immunoglobulin kappa constant	_TVAAPSVFIFPPSDEQLKSGTAS[Hex]VVC[Carbamidomethyl (C)]LLNNFYPR	2
Hex	P0DOY2	Immunoglobulin lambda constant 2	_ADSSPVK[Hex]AGVETTTPSK	1
Hex	P02768	Serum albumin	_DVC[Carbamidomethyl (C)]K[Hex]NYAEAK	2
Hex	P23142	Fibulin-1	_LGESC[Carbamidomethyl (C)]IN[Hex]TVGSFR	2
Hex	P02768	Serum albumin	_K[Hex]VPQVSTPTLVEVSR	1
Hex	P02768	Serum albumin	_QEPERNEC[Carbamidomethyl (C)]FLQHK[Hex]DDNPNLPR	2
Hex	P02768	Serum albumin	_KQT[Hex]ALVELVK	1
Hex	P02768	Serum albumin	_LSQRFPK[Hex]AEFAEVSK	1
Hex	P21333;P21333-2;Q5HY54	Filamin-A;Isoform 2 of Filamin-A;Filamin-A	_AEAGVPAEFSIW[HexN]T[HexN]R	2
Hex	P01834	Immunoglobulin kappa constant	_ADYEKHK[Hex]VYAC[Carbamidomethyl (C)]EVTHQGLSSPVTK	2
Hex	P01023	Alpha-2-macroglobulin	_GHFSISIPVK[Hex]SDIAPVAR	1
Hex	P01023	Alpha-2-macroglobulin	_GHFSIS[Hex]IPVKSDIAPVAR	1
Hex	P02787	Serotransferrin	_NLNEK[Hex]DYELLC[Carbamidomethyl (C)]LDGTR	2
Hex	P00738	Haptoglobin	_VVLHPN[HexNAc]YS[HexNAc]QVDIGLIK	2
Hex	P01023	Alpha-2-macroglobulin	_K[Hex]YSDASDC[Carbamidomethyl (C)]HGEDSQAFC[Carbamidomethyl (C)]EK	3
Hex	P01024	Complement C3	_MDK[Hex]VGKYPK	1
Hex	P01857	Immunoglobulin heavy constant gamma 1	_VS[Hex]NKALPAPIEK	1
Hex	P02787	Serotransferrin	_K[Hex]PVDEYKDC[Carbamidomethyl (C)]HLAQVPSHTVVAR	2
Hex	P02768	Serum albumin	_VTKC[Carbamidomethyl (C)]C[Carbamidomethyl (C)]T[Hex]ESLVNR	3
Hex	P02787	Serotransferrin	_K[Hex]DSGFQMNQLR	1
Hex	P00738	Haptoglobin	_AVGDK[Hex]LPEC[Carbamidomethyl (C)]EAVC[Carbamidomethyl (C)]GKPK	3
Hex	P02787	Serotransferrin	_NPDPWAKN[HexNAc]LNEKDYELLC[Carbamidomethyl (C)]LDGTR	2
Hex	P02768	Serum albumin	_FKDLGEENFK[Hex]ALVLIAFAQYLQQC[Carbamidomethyl (C)]PFEDHVK	2
Hex	P02768	Serum albumin	_LKC[Carbamidomethyl (C)]AS[Hex]LQKFGER	2
Hex	P01023	Alpha-2-macroglobulin	_GVPIPN[Hex]KVIFIR	1
Hex	P07358	Complement component C8 beta chain	_WNC[Carbamidomethyl (C)]W[Hex]SNWSSC[Carbamidomethyl (C)]SGR	3
Hex	P02768	Serum albumin	_VFDEFKPLVEEPQNLIK[Hex]QNC[Carbamidomethyl (C)]ELFEQLGEYK	2
Hex	P01023	Alpha-2-macroglobulin	_TEHPFTVEEFVLPKFEVQVT[HexNAc]VPK	1
Hex	P02768	Serum albumin	_RYK[Hex]AAFTEC[Carbamidomethyl (C)]C[Carbamidomethyl (C)]QAADK	3
Hex	P01860	Immunoglobulin heavy constant gamma 3	_VELK[Hex]TPLGDTTHTC[Carbamidomethyl (C)]PR	2
Hex	P02787	Serotransferrin	_NTYEK[Hex]YLGEEYVK	1
Hex	P02768	Serum albumin	_ALVLIAFAQY[Hex]LQQC[Carbamidomethyl (C)]PFEDHVKLVNEVTEFAK	2
Hex	P02768	Serum albumin	_LVNEVTEFAKT[Hex]C[Carbamidomethyl (C)]VADESAENC[Carbamidomethyl (C)]DK	3
Hex	P02768	Serum albumin	_QN[Hex]C[Carbamidomethyl (C)]ELFEQLGEYKFQNALLVR	2
Hex	P33151	Cadherin-5	_VGTSVGS[Hex]LFVEDPDEPQNR	1
Hex	P02768	Serum albumin	_AT[HexNAc]KEQLKAVMDDFAAFVEK	1
Hex	P02768	Serum albumin	_SHC[Carbamidomethyl (C)]IAEVENDEMPADLPS[Hex]LAADFVESKDVC[Carbamidomethyl (C)]KNYAEAK	3
Hex	P02787	Serotransferrin	_KPVDEYK[Hex]DC[Carbamidomethyl (C)]HLAQVPSHTVVAR	2
Hex	P02768	Serum albumin	_LDELR[Hex]DEGKASSAK	1
Hex	P02768	Serum albumin	_QN[HexN]C[Carbamidomethyl (C)]ELFEQLGEYKFQNALLVR	2
Hex	P01023	Alpha-2-macroglobulin	_LLIYAVLPT[Hex]GDVIGDSAKYDVENC[Carbamidomethyl (C)]LANK	2
Hex	P01834	Immunoglobulin kappa constant	_VDNALQSGNSQESVT[Hex]EQDSKDSTYSLSSTLTLSK	1
Hex	P01834	Immunoglobulin kappa constant	_VYAC[Carbamidomethyl (C)]EVT[Hex]HQGLSSPVTKSFNR	2
Hex	P02647	Apolipoprotein A-I	_DLATVY[Hex]VDVLKDSGRDYVSQFEGSALGK	1
Hex	P02787	Serotransferrin	_KC[Carbamidomethyl (C)]STSS[Hex]LLEAC[Carbamidomethyl (C)]TFR	3
Hex	P02768	Serum albumin	_AEFAEVS[Hex]KLVTDLTK	1
Hex	P02768	Serum albumin	_K[Hex]QTALVELVK	1
Hex	P02787	Serotransferrin	_GDVAFVK[Hex]HQTVPQNTGGKNPDPWAK	1
Hex	P0DOY2	Immunoglobulin lambda constant 2	_ATLVC[Carbamidomethyl (C)]LISDFY[Hex]PGAVTVAWKADSSPVK	2
Hex	P02768	Serum albumin	_LK[Hex]EC[Carbamidomethyl (C)]C[Carbamidomethyl (C)]EKPLLEK	3
Hex	P69905	Hemoglobin subunit alpha	_VLS[Hex]PADKTNVK	1
Hex	P02768	Serum albumin	_AAC[Carbamidomethyl (C)]LLPK[Hex]LDELRDEGK	2
Hex	P02768	Serum albumin	_LVNEVTEFAK[Hex]TC[Carbamidomethyl (C)]VADESAENC[Carbamidomethyl (C)]DK	3
Hex	P01008	Antithrombin-III	_VAEGTQVLELPFKGDDIT[Hex]MVLILPKPEK	1
Hex	P01876	Immunoglobulin heavy constant alpha 1	_TFTC[Carbamidomethyl (C)]T[Hex]AAYPESKTPLTATLSK	2
Hex	P02768	Serum albumin	_FK[Hex]DLGEENFK	1
Hex	P02748	Complement component C9	_MSPWSEW[Hex]SQC[Carbamidomethyl (C)]DPC[Carbamidomethyl (C)]LR	3
Hex	P0DOY2	Immunoglobulin lambda constant 2	_ATLVC[Carbamidomethyl (C)]LISDFYPGAVTVAW[Hex]KADSSPVK	2
Hex	P01042	Kininogen-1	_YEIK[Hex]EGDC[Carbamidomethyl (C)]PVQSGK	2
Hex	P01861	Immunoglobulin heavy constant gamma 4	_VESKYGPPC[Carbamidomethyl (C)]PS[Hex]C[Carbamidomethyl (C)]PAPEFLGGPSVFLFPPKPK	3
Hex	P02768	Serum albumin	_QIKKQT[Hex]ALVELVK	1
Hex	P02768	Serum albumin	_HPY[Hex]FY[Hex]APELLFFAK	2
Hex	P02768	Serum albumin	_N[Hex]LGKVGSK	1
Hex	P02774;P02774-3	Vitamin D-binding protein;Isoform 3 of Vitamin D-binding protein	_KFPSGT[Hex]FEQVSQLVK	1
Hex	P02790	Hemopexin	_RLEKEVGTPHGIILDS[Hex]VDAAFIC[Carbamidomethyl (C)]PGSSR	2
Hex	P0C0L5	Complement C4-B	_MK[Hex]FAC[Carbamidomethyl (C)]YYPR	2
Hex	P0DOY2	Immunoglobulin lambda constant 2	_AAPSVTLFPPSSEELQANKATLVC[Carbamidomethyl (C)]LIS[Hex]DFYPGAVTVAWKADSSPVK	2
Hex	P13671	Complement component C6	_SNAVDGQW[Hex]GC[Carbamidomethyl (C)]WSSWSTC[Carbamidomethyl (C)]DATYKR	3
Hex	P02768	Serum albumin	_SLHTLFGDK[Hex]LC[Carbamidomethyl (C)]TVATLR	2
Hex	P02768	Serum albumin	_SHC[Carbamidomethyl (C)]IAEVENDEMPADLPSLAADFVESK[HexN]DVC[Carbamidomethyl (C)]K	3
Hex	P01834	Immunoglobulin kappa constant	_TVAAPS[Hex]VFIFPPSDEQLKSGTASVVC[Carbamidomethyl (C)]LLNNFYPR	2
Hex	P01834	Immunoglobulin kappa constant	_VDNALQSGN[Hex]SQESVTEQDSKDSTYSLSSTLTLSK	1
Hex	P02787	Serotransferrin	_GDVAFVK[Hex]HQTVPQNTGGK	1
Hex	P02768	Serum albumin	_ADDKET[Hex]C[Carbamidomethyl (C)]FAEEGKK	2
Hex	P02768	Serum albumin	_AEFAEVSK[Hex]LVTDLTK	1
Hex	A0A0A0MT69	Immunoglobulin kappa joining 4 (Fragment)	_L[Acetyl (Protein N-term)]T[Hex]FGGGTK	2
Hex	P00738	Haptoglobin	_QLVEIEK[HexN]VVLHPN[HexNAc]YS[HexNAc]QVDIGLIK	3
Hex	P02790	Hemopexin	_SLGPNSC[Carbamidomethyl (C)]SANGPGLY[Hex]LIHGPNLYC[Carbamidomethyl (C)]YSDVEKLNAAK	3
Hex	P02768	Serum albumin	_LAK[Hex]TYETTLEK	1
Hex	A0A0B4J1V6	Immunoglobulin heavy variable 3-73	_LSC[Carbamidomethyl (C)]AASGFT[HexN]FSGSAMHWVR	2
Hex	D6RF35	Vitamin D-binding protein	_LPDATPT[HexNAc]ELAK	1
Hex	P02768	Serum albumin	_N[HexN]YAEAK[Hex(2)]DVFLGM[Oxidation (M)]FLYEYAR	3
Hex	P02768	Serum albumin	_T[Hex]C[Carbamidomethyl (C)]VADESAENC[Carbamidomethyl (C)]DKSLHTLFGDK	3
Hex	P02768	Serum albumin	_YKAAFT[Hex]EC[Carbamidomethyl (C)]C[Carbamidomethyl (C)]QAADK	3
Hex	P02768	Serum albumin	_QIKK[Hex]QTALVELVK	1
Hex	P01834	Immunoglobulin kappa constant	_VDNALQS[Hex]GNSQESVTEQDSKDSTYSLSSTLTLSK	1
Hex	A0A0G2JMB2	Immunoglobulin heavy constant alpha 2 (Fragment)	_LSLHRPALEDLLLGSEAN[HexNAc]LTC[Carbamidomethyl (C)]TLTGLR	2
Hex	P02768	Serum albumin	_QIK[Hex]KQTALVELVK	1
Hex	P00450	Ceruloplasmin	_VTFHNK[Hex]GAYPLSIEPIGVR	1
Hex	P00738	Haptoglobin	_ILGGHLDAK[Hex]GSFPWQAK	1
Hex	P01009	Alpha-1-antitrypsin	_AVLTIDEKGT[Hex]EAAGAMFLEAIPMSIPPEVK	1
Hex	P01009	Alpha-1-antitrypsin	_LGMFN[Hex]IQHC[Carbamidomethyl (C)]KK	2
Hex	P01024	Complement C3	_TKK[Hex]QELSEAEQATR	1
Hex	P02749	Beta-2-glycoprotein 1	_VYKPSAGNNS[HexNAc]LYR	1
Hex	P02763	Alpha-1-acid glycoprotein 1	_IPK[Hex]SDVVYTDWKK	1
Hex	P02768	Serum albumin	_LVRPEVDVM[Oxidation (M)]C[Carbamidomethyl (C)]TAFHDN[Hex]EETFLKK	3
Hex	P02768	Serum albumin	_C[Carbamidomethyl (C)]AS[Hex]LQKFGER	2
Hex	P02768	Serum albumin	_QRLK[Hex]C[Carbamidomethyl (C)]ASLQK	2
Hex	P02787	Serotransferrin	_YLGEEY[Hex]VKAVGNLRK	1
Hex	P0DOY2	Immunoglobulin lambda constant 2	_AGVETTTPSKQS[Hex]NNKYAASSYLSLTPEQWK	1
Hex	P0DOY2	Immunoglobulin lambda constant 2	_YAASSYLS[Hex]LTPEQWKSHR	1
Hex	P0DOY2	Immunoglobulin lambda constant 2	_ATLVC[Carbamidomethyl (C)]LIS[Hex]DFYPGAVTVAWKADSSPVKAGVETTTPSK	2
Hex	P0DOY3	Immunoglobulin lambda constant 3	_SHK[Hex]SYSC[Carbamidomethyl (C)]QVTHEGSTVEK	2
Hex	P36980;P36980-2	Complement factor H-related protein 2;Isoform Short of Complement factor H-related protein 2	_T[HexNAc]GDIVEFVC[Carbamidomethyl (C)]K	2
Hex	P02768	Serum albumin	_ET[Hex]C[Carbamidomethyl (C)]FAEEGKK	2
Hex	P01023	Alpha-2-macroglobulin	_KYSDASDC[Carbamidomethyl (C)]HGEDS[Hex]QAFC[Carbamidomethyl (C)]EK	3
Hex	P01834	Immunoglobulin kappa constant	_HK[Hex]VYAC[Carbamidomethyl (C)]EVTHQGLSSPVTK	2
Hex	P02768	Serum albumin	_TC[Carbamidomethyl (C)]VADESAEN[Hex]C[Carbamidomethyl (C)]DKSLHTLFGDK	3
Hex	P01859	Immunoglobulin heavy constant gamma 2	_VVS[Hex]VLTVVHQDWLNGKEYK	1
Hex	P01857	Immunoglobulin heavy constant gamma 1	_THTC[Carbamidomethyl (C)]PPC[Carbamidomethyl (C)]PAPELLGGPS[Hex]VFLFPPKPK	3
Hex	P02787	Serotransferrin	_DGAGDVAFVK[Hex]HSTIFENLANK	1
Hex	P01857	Immunoglobulin heavy constant gamma 1	_VVS[Hex]VLTVLHQDWLNGKEYK	1
Hex	P01871	Immunoglobulin heavy constant mu	_GQPLSPEK[Hex]YVTSAPMPEPQAPGR	1
Hex	P02768	Serum albumin	_QNC[Carbamidomethyl (C)]ELFEQLGEYK[Hex]FQNALLVR	2
Hex	P02768	Serum albumin	_LVNEVT[Hex]EFAKTC[Carbamidomethyl (C)]VADESAENC[Carbamidomethyl (C)]DK	3
Hex	P02768	Serum albumin	_EQLK[Hex]AVM[Oxidation (M)]DDFAAFVEK	2
Hex	A0A0C4DH73;P01611	Immunoglobulin kappa variable 1-12;Immunoglobulin kappa variable 1D-12	_ASQGISSW[HexN]LAWYQQKPGK	1
Hex	P0DOY2	Immunoglobulin lambda constant 2	_ADSS[Hex]PVKAGVETTTPSK	1
Hex	P02768	Serum albumin	_ADLAKY[Hex]IC[Carbamidomethyl (C)]ENQDSISSK	2
Hex	P01024	Complement C3	_LDK[Hex]AC[Carbamidomethyl (C)]EPGVDYVYK	2
Hex	P01024	Complement C3	_DYAGVFSDAGLT[HexN]FTSSSGQQTAQR	1
Hex	P01834	Immunoglobulin kappa constant	_VQWKVDN[Hex]ALQSGNSQESVTEQDSK	1
Hex	P02768	Serum albumin	_LVRPEVDVMC[Carbamidomethyl (C)]TAFHDNEETFLK[Hex]K	2
Hex	P02768	Serum albumin	_LDELR[Hex]DEGK	1
Hex	P02647	Apolipoprotein A-I	_QK[Hex]LHELQEK	1
Hex	P01857	Immunoglobulin heavy constant gamma 1	_TKPREEQYNST[HexNAc]YR	1
Hex	P02768	Serum albumin	_SHC[Carbamidomethyl (C)]IAEVENDEMPADLPSLAADFVES[Hex]KDVC[Carbamidomethyl (C)]KNYAEAK	3
Hex	A0A0B4J1X8	Immunoglobulin heavy variable 3-43	_DN[HexNAc]SKNSLYLQMNSLR	1
Hex	P00738	Haptoglobin	_AVGDK[Hex]LPEC[Carbamidomethyl (C)]EADDGC[Carbamidomethyl (C)]PKPPEIAHGYVEHSVR	3
Hex	P02768	Serum albumin	_ADLAK[Hex]YIC[Carbamidomethyl (C)]ENQDSISSK	2
Hex	P02768	Serum albumin	_FPK[Hex]AEFAEVSK	1
Hex	O00187	Mannan-binding lectin serine protease 2	_TLPHR[Hex]IETK	1
Hex	P02768	Serum albumin	_TPVSDRVTK[Hex]C[Carbamidomethyl (C)]C[Carbamidomethyl (C)]TESLVNR	3
Hex	P02768	Serum albumin	_TC[Carbamidomethyl (C)]VADESAENC[Carbamidomethyl (C)]DK[Hex]SLHTLFGDK	3
Hex	P02768	Serum albumin	_K[Hex]LVAASQAALGL	1
Hex	A0A087WSY5;Q96IY4	Carboxypeptidase B2	_SK[HexN]DHEELSLVASEAVR	1
Hex	P02768	Serum albumin	_ADDK[Hex]ETC[Carbamidomethyl (C)]FAEEGKK	2
Hex	P02768	Serum albumin	_LK[Hex]C[Carbamidomethyl (C)]ASLQK	2
Hex	P02787	Serotransferrin	_SAGWN[Hex]IPIGLLYC[Carbamidomethyl (C)]DLPEPR	2
Hex	A0A0G2JRQ6	Uncharacterized protein (Fragment)	_ASQGISN[HexN]SLAWYQQKPGKAPK	1
Hex	P02768	Serum albumin	_C[Carbamidomethyl (C)]C[Carbamidomethyl (C)]T[Hex]ESLVNR	3
Hex	P01859	Immunoglobulin heavy constant gamma 2	_VVSVLT[Hex]VVHQDWLNGKEYK	1
Hex	P02768	Serum albumin	_K[Hex]YLYEIAR	1
Hex	P01857	Immunoglobulin heavy constant gamma 1	_FNWY[Hex]VDGVEVHNAKTKPR	1
Hex	P00738	Haptoglobin	_K[Hex]QLVEIEK	1
Hex	P01857	Immunoglobulin heavy constant gamma 1	_C[Carbamidomethyl (C)]KVSNK[Hex]ALPAPIEK	2
Hex	P02768	Serum albumin	_SHC[Carbamidomethyl (C)]IAEVEN[HexN]DEMPADLPS[Hex]LAADFVESK	3
Hex	P02787	Serotransferrin	_KSAS[Hex]DLTWDNLK	1
Hex	P0DOY2	Immunoglobulin lambda constant 2	_ATLVC[Carbamidomethyl (C)]LIS[Hex]DFYPGAVTVAWKADSSPVK	2
Hex	P02787	Serotransferrin	_GDVAFVKHQT[Hex]VPQNTGGKNPDPWAK	1
Hex	P33151	Cadherin-5	_VC[Carbamidomethyl (C)]EN[Hex]AVHGQLVLQISAIDKDITPR	2
Hex	A0A0B4J2D9;P0DP09	Immunoglobulin kappa variable 1D-13;Immunoglobulin kappa variable 1-13	_ASQGISSALAW[HexN]YQQKPGKAPK	1
Hex	P0DOY2	Immunoglobulin lambda constant 2	_AGVETTT[Hex]PSKQSNNK	1
Hex	A0A0G2JMB2	Immunoglobulin heavy constant alpha 2 (Fragment)	_GFS[Hex]PKDVLVR	1
Hex	P01834	Immunoglobulin kappa constant	_TVAAPSVFIFPPS[Hex]DEQLKSGTASVVC[Carbamidomethyl (C)]LLNNFYPR	2
Hex	P02768	Serum albumin	_HPYFY[Hex]APELLFFAKR	1
Hex	P01023	Alpha-2-macroglobulin	_SKAIGY[Hex]LNTGYQR	1
Hex	P01834	Immunoglobulin kappa constant	_T[HexN]VAAPSVFIFPPSDEQLKSGTASVVC[Carbamidomethyl (C)]LLNNFYPREAK	2
Hex	A0A0B4J2B5	Immunoglobulin heavy variable 3/OR16-9 (non-functional) (Fragment)	_EVQLVES[Hex]GGGLVQPGGSLR	1
Hex	P01834	Immunoglobulin kappa constant	_VDNALQSGNS[Hex]QESVTEQDSKDSTYSLSSTLTLSK	1
Hex	P02768	Serum albumin	_LK[Hex]C[Carbamidomethyl (C)]ASLQKFGER	2
Hex	P02768	Serum albumin	_QNC[Carbamidomethyl (C)]ELFEQLGEY[Hex]KFQNALLVR	2
Hex	P02768	Serum albumin	_EFNAET[Hex]FTFHADIC[Carbamidomethyl (C)]TLSEKER	2
Hex	P02787	Serotransferrin	_SETK[Hex]DLLFRDDTVC[Carbamidomethyl (C)]LAK	2
Hex	P23142	Fibulin-1	_LGESC[Carbamidomethyl (C)]INT[Hex]VGSFR	2
Hex	P02768	Serum albumin	_VTK[Hex]C[Carbamidomethyl (C)]C[Carbamidomethyl (C)]TESLVNR	3
Hex	P02768	Serum albumin	_Y[Hex]KAAFTEC[Carbamidomethyl (C)]C[Carbamidomethyl (C)]QAADK	3
Hex	P02768	Serum albumin	_SHC[Carbamidomethyl (C)]IAEVENDEMPADLPSLAADFVESK[Hex]DVC[Carbamidomethyl (C)]KNYAEAK	3
Hex	P02787	Serotransferrin	_DC[Carbamidomethyl (C)]HLAQVPSHT[HexNAc]VVAR	2
Hex	P02787	Serotransferrin	_K[Hex]SASDLTWDNLK	1
Hex	P02768	Serum albumin	_ATKEQLK[Hex]AVMDDFAAFVEK	1
Hex	P01023	Alpha-2-macroglobulin	_LVDGK[Hex]GVPIPNKVIFIR	1
Hex	P02768	Serum albumin	_LDELRDEGKAS[Hex]SAK	1
Hex	P02768	Serum albumin	_SHC[Carbamidomethyl (C)]IAEVENDEMPADLPSLAADFVESKDVC[Carbamidomethyl (C)]KN[Hex]YAEAK	3
Hex	P02787	Serotransferrin	_C[Carbamidomethyl (C)]LK[Hex]DGAGDVAFVK	2
Hex	P0DOY2	Immunoglobulin lambda constant 2	_QSNNKYAASS[Hex]YLSLTPEQWK	1
Hex	P01023	Alpha-2-macroglobulin	_YNILPEK[Hex]EEFPFALGVQTLPQTC[Carbamidomethyl (C)]DEPK	2
Hex	P00450	Ceruloplasmin	_QKDVDKEFYLFPTVFDEN[Hex]ESLLLEDNIR	1
Hex	P00738	Haptoglobin	_S[HexNAc]C[Carbamidomethyl (C)]AVAEYGVYVK	2
Hex	P02768	Serum albumin	_YTKKVPQVS[Hex]TPTLVEVSR	1
Hex	P02768	Serum albumin	_TC[Carbamidomethyl (C)]VADES[Hex]AENC[Carbamidomethyl (C)]DKSLHTLFGDK	3
Hex	P02768	Serum albumin	_SLHT[Hex]LFGDKLC[Carbamidomethyl (C)]TVATLR	2
Hex	P00738	Haptoglobin	_VVLHPNYS[HexNAc]QVDIGLIK	1
Hex	P01861	Immunoglobulin heavy constant gamma 4	_YGPPC[Carbamidomethyl (C)]PSC[Carbamidomethyl (C)]PAPEFLGGPS[Hex]VFLFPPKPK	3
Hex	P02768	Serum albumin	_LVRPEVDVM[Oxidation (M)]C[Carbamidomethyl (C)]T[Hex]AFHDNEETFLKK	3
Hex	P01859	Immunoglobulin heavy constant gamma 2	_VSNK[Hex]GLPAPIEK	1
Hex	A0A0B4J1V6	Immunoglobulin heavy variable 3-73	_LSC[Carbamidomethyl (C)]AASGFTFSGS[Hex]AMHWVR	2
Hex	P00738	Haptoglobin	_FTDHLKY[Hex]VMLPVADQDQC[Carbamidomethyl (C)]IR	2
Hex	P01024	Complement C3	_EGVQK[Hex]EDIPPADLSDQVPDTESETR	1
Hex	P01861	Immunoglobulin heavy constant gamma 4	_VESKY[Hex]GPPC[Carbamidomethyl (C)]PSC[Carbamidomethyl (C)]PAPEFLGGPSVFLFPPKPK	3
Hex	P02765	Alpha-2-HS-glycoprotein	_HTFMGVVS[Hex]LGSPSGEVSHPR	1
Hex	P02787	Serotransferrin	_SMGGKEDLIW[Hex]ELLNQAQEHFGKDK	1
Hex	P02790	Hemopexin	_SGAQAT[Hex]W[Hex]TELPWPHEKVDGALC[Carbamidomethyl (C)]MEK	3
Hex	P01857	Immunoglobulin heavy constant gamma 1	_THTC[Carbamidomethyl (C)]PPC[Carbamidomethyl (C)]PAPELLGGPS[Hex]VFLFPPKPKDTLMISR	3
Hex	E7EUF1;Q13822-3	Ectonucleotide pyrophosphatase/phosphodiesterase family member 2;Isoform 3 of Ectonucleotide pyrophosphatase/phosphodiesterase family member 2	_ER[Hex]HLLYGRPAVLYR	1
Hex	P02768	Serum albumin	_YTKK[Hex]VPQVSTPTLVEVSR	1
Hex	P02768	Serum albumin	_SHC[Carbamidomethyl (C)]IAEVENDEMPADLPSLAADFVESK[Hex]DVC[Carbamidomethyl (C)]K	3
Hex	P02768	Serum albumin	_EQLK[Hex]AVMDDFAAFVEK	1
Hex	P01023	Alpha-2-macroglobulin	_LVDGK[Hex]GVPIPNK	1
Hex	A0A075B6K2	Immunoglobulin lambda variable 3-12	_PSGIPERFS[Hex]GSNPGNTATLTISR	1
Hex	D6RF35	Vitamin D-binding protein	_AKLPDATPT[HexNAc]ELAK	1
Hex	P01834	Immunoglobulin kappa constant	_VQWKVDN[Hex]ALQSGNSQESVTEQDSKDSTYSLSSTLTLSK	1
Hex	P01859	Immunoglobulin heavy constant gamma 2	_TKPREEQFNST[HexNAc]FR	1
Hex	P02649	Apolipoprotein E	_AYKS[Hex]ELEEQLTPVAEETR	1
Hex	P02768	Serum albumin	_NYAEAK[Hex]DVFLGM[Oxidation (M)]FLYEYAR	2
Hex	P0DOY2	Immunoglobulin lambda constant 2	_QSNNKY[Hex]AASSYLSLTPEQWK	1
Hex	P0DOY2	Immunoglobulin lambda constant 2	_AGVET[Hex]TTPSKQSNNK	1
Hex	P0DOY2	Immunoglobulin lambda constant 2	_AGVETTTPSKQSNNKYAASSY[Hex]LSLTPEQWK	1
Hex	P0DOY2	Immunoglobulin lambda constant 2	_AGVETTT[Hex]PSKQSNNKYAASSYLSLTPEQWK	1
Hex	P02768	Serum albumin	_PC[Carbamidomethyl (C)]FSALEVDET[HexN]YVPKEFNAETFTFHADIC[Carbamidomethyl (C)]TLSEKER	3
Hex	P02768	Serum albumin	_LVRPEVDVMC[Carbamidomethyl (C)]T[Hex]AFHDNEETFLKK	2
Hex	P01762	Immunoglobulin heavy variable 3-11	_NSLYLQM[Oxidation (M)]N[HexN]SLRAEDTAVYYC[Carbamidomethyl (C)]AR	3
Hex	A0A0B4J2D9;P0DP09	Immunoglobulin kappa variable 1D-13;Immunoglobulin kappa variable 1-13	_ASQGISS[Hex]ALAWYQQKPGKAPK	1
Hex	P02787	Serotransferrin	_K[Hex]ASYLDC[Carbamidomethyl (C)]IR	2
Hex	P02768	Serum albumin	_RMPC[Carbamidomethyl (C)]AEDYLS[Hex]VVLNQLC[Carbamidomethyl (C)]VLHEKTPVSDR	3
Hex	P02768	Serum albumin	_VFDEFK[Hex(2)]PLVEEPQNLIKQNC[Carbamidomethyl (C)]ELFEQLGEYK	2
Hex	P01871	Immunoglobulin heavy constant mu	_EGKQVGS[Hex]GVTTDQVQAEAK	1
Hex	P02768	Serum albumin	_FPKAEFAEVSK[Hex]LVTDLTK	1
Hex	P02787	Serotransferrin	_TAGWNIPMGLLYNKINHC[Carbamidomethyl (C)]R[Hex]FDEFFSEGC[Carbamidomethyl (C)]APGSK	3
Hex	P01857	Immunoglobulin heavy constant gamma 1	_VVSVLT[HexN]VLHQDWLNGKEYK	1
Hex	P02768	Serum albumin	_ATKEQLK[Hex]AVM[Oxidation (M)]DDFAAFVEK	2
Hex	P01834	Immunoglobulin kappa constant	_TVAAPSVFIFPPSDEQLKSGT[Hex]ASVVC[Carbamidomethyl (C)]LLNNFYPR	2
Hex	P01024	Complement C3	_AHEAKIR[Hex]YYT[HexNAc]YLIMNK	2
Hex	P01619	Immunoglobulin kappa variable 3-20	_AT[HexN]LSC[Carbamidomethyl (C)]RASQSVSSSYLAW[HexN]YQQKPGQAPR	3
Hex	P01834	Immunoglobulin kappa constant	_VDNALQSGNSQES[Hex]VTEQDSKDSTYSLSSTLTLSK	1
Hex	P0DOY2	Immunoglobulin lambda constant 2	_AGVETTTPSK[Hex]QSNNK	1
Hex	P02748	Complement component C9	_MSPW[Hex]SEWSQC[Carbamidomethyl (C)]DPC[Carbamidomethyl (C)]LR	3
Hex	P02768	Serum albumin	_VFDEFK[Hex]PLVEEPQNLIK	1
Hex	P02768	Serum albumin	_SHC[Carbamidomethyl (C)]IAEVENDEMPADLPS[Hex]LAADFVESKDVC[Carbamidomethyl (C)]K	3
Methyl	P01857	Immunoglobulin heavy constant gamma 1	_SR[Methyl (KR)]WQQGNVFSC[Carbamidomethyl (C)]SVMHEALHNHYTQK	2
Methyl	P01700	Immunoglobulin lambda variable 1-47	_SGTSASLAISGLR[dimethyl (KR)]	1
Methyl	P01782	Immunoglobulin heavy variable 3-9	_NSLYLQMNSLR[Methyl (KR)]	1
Methyl	P0DOY2	Immunoglobulin lambda constant 2	_ATLVC[Carbamidomethyl (C)]LISDFYPGAVTVAWK[dimethyl (KR)]	2
Methyl	A0A0B4J1X5	Immunoglobulin heavy variable 3-74	_INSDGSSTSYADSVK[dimethyl (KR)]	1
Methyl	A0A075B6R2	Immunoglobulin heavy variable 4-4	_VTISVDK[Methyl (KR)]	1
Methyl	A0A0B4J1V0	Immunoglobulin heavy variable 3-15	_SK[Methyl (KR)]TDGGTTDYAAPVK	1
Methyl	P06310	Immunoglobulin kappa variable 2-30	_VSNRDSGVPDR[Methyl (KR)]FSGSGSGTDFTLK	1
Methyl	A0A075B7E8	Immunoglobulin heavy variable 3/OR16-13 (non-functional) (Fragment)	_GLVWVSR[Methyl (KR)]	1
Methyl	P01706	Immunoglobulin lambda variable 2-11	_RPSGVPDRFSGSK[Methyl (KR)]	1
Methyl	P0DOY2	Immunoglobulin lambda constant 2	_AGVETTTPSKQSNNK[dimethyl (KR)]YAASSYLSLTPEQWK	1
Methyl	P80748	Immunoglobulin lambda variable 3-21	_SVHWYQQK[Methyl (KR)]PGQAPVLVVYDDSDRPSGIPER	1
Methyl	A0A0B4J1X8	Immunoglobulin heavy variable 3-43	_DNSK[Methyl (KR)]NSLYLQM[Oxidation (M)]NSLR	2
Methyl	A0A0A0MS15	Immunoglobulin heavy variable 3-49	_M[Oxidation (M)]EFGLSWVFLVAILK[dimethyl (KR)]GVQC[Carbamidomethyl (C)]EVQLVESGGGLVQPGR	3
Methyl	A0A075B6R2	Immunoglobulin heavy variable 4-4	_LSSVTAADTAVYYC[Carbamidomethyl (C)]AR[dimethyl (KR)]	2
Methyl	P0DOY2	Immunoglobulin lambda constant 2	_YAASSYLSLTPEQWK[Methyl (KR)]	1
Methyl	A0A0C4DH31	Immunoglobulin heavy variable 1-18	_SLR[Methyl (KR)]SDDTAVYYC[Carbamidomethyl (C)]AR	2
Methyl	A0A0A0MT36	Immunoglobulin kappa variable 6D-21	_ASQSIGSSLHWYQQK[Methyl (KR)]PDQSPK	1
Methyl	A0A0B4J1Y9	Immunoglobulin heavy variable 3-72	_QAPGKGLEWVGR[Methyl (KR)]	1
Methyl	P01619	Immunoglobulin kappa variable 3-20	_FSGSGSGTDFTLTISR[Methyl (KR)]	1
Methyl	P01705	Immunoglobulin lambda variable 2-23	_LMIYEGSK[Methyl (KR)]	1
Methyl	A0A0C4DH34	Immunoglobulin heavy variable 4-28	_VTMSVDTSK[Methyl (KR)]	1
Methyl	A0A0C4DH29	Immunoglobulin heavy variable 1-3	_DTSASTAYMELSSLR[Methyl (KR)]	1
Methyl	P01703	Immunoglobulin lambda variable 1-40	_LLIYGNSNR[Methyl (KR)]PSGVPDR[Methyl (KR)]	2
Methyl	A0A0B4J1V2	Immunoglobulin heavy variable 2-26	_MGVSWIR[Methyl (KR)]	1
Methyl	A0A0C4DH72	Immunoglobulin kappa variable 1-6	_LLIYAASSLQSGVPSR[Methyl (KR)]	1
Methyl	A0A0B4J1Y9	Immunoglobulin heavy variable 3-72	_QAPGK[dimethyl (KR)]GLEWVGR	1
Methyl	P01782	Immunoglobulin heavy variable 3-9	_DNAK[Methyl (KR)]NSLYLQMNSLR	1
Methyl	A0A0G2JS06	Immunoglobulin lambda variable 5-39	_YKSDSDK[Methyl (KR)]QQGSGVPSR	1
Methyl	P01619	Immunoglobulin kappa variable 3-20	_ATLSC[Carbamidomethyl (C)]R[dimethyl (KR)]ASQSVSSSYLAWYQQKPGQAPR	2
Methyl	P01706	Immunoglobulin lambda variable 2-11	_LMIYDVSK[dimethyl (KR)]	1
Methyl	A0A0C4DH68	Immunoglobulin kappa variable 2-24	_FSGSGAGTDFTLK[Methyl (KR)]	1
Methyl	A0A0B4J1Y9	Immunoglobulin heavy variable 3-72	_TEDTAVYYC[Carbamidomethyl (C)]AR[dimethyl (KR)]	2
Methyl	A0A0C4DH67	Immunoglobulin kappa variable 1-8	_LLIYAASTLQSGVPSR[Methyl (KR)]	1
Methyl	A0A075B6P5;P01615	Immunoglobulin kappa variable 2-28;Immunoglobulin kappa variable 2D-28	_SSQSLLHSNGYNYLDWYLQK[Methyl (KR)]PGQSPQLLIYLGSNR	1
Methyl	A0A0B4J1V0	Immunoglobulin heavy variable 3-15	_TDGGTTDYAAPVK[Methyl (KR)]	1
Methyl	A0A075B7B8	Immunoglobulin heavy variable 3/OR16-12 (non-functional) (Fragment)	_FTISTDNSK[Methyl (KR)]	1
Methyl	P01834	Immunoglobulin kappa constant	_VDNALQSGNSQESVTEQDSK[Methyl (KR)]	1
Methyl	P01023	Alpha-2-macroglobulin	_VSVQLEASPAFLAVPVEK[dimethyl (KR)]EQAPHC[Carbamidomethyl (C)]IC[Carbamidomethyl (C)]ANGR	3
Methyl	P01817	Immunoglobulin heavy variable 2-5	_SR[Methyl (KR)]LTITK	1
Methyl	A0A0J9YVT0;P0DP02	Immunoglobulin heavy variable 3-33 (Fragment);Immunoglobulin heavy variable 3-30-3	_DNSK[Methyl (KR)]NTLYLQMNSLR	1
Methyl	P01782	Immunoglobulin heavy variable 3-9	_LSC[Carbamidomethyl (C)]AASGFTFDDYAMHWVR[dimethyl (KR)]	2
Methyl	P06312	Immunoglobulin kappa variable 4-1	_SSQSVLYSSNNK[Methyl (KR)]	1
Methyl	P01871	Immunoglobulin heavy constant mu	_VTSTLTIKESDWLGQSM[Oxidation (M)]FTC[Carbamidomethyl (C)]R[Methyl (KR)]	3
Methyl	A0A0C4DH43	Immunoglobulin heavy variable 2-70D	_VSWIR[Methyl (KR)]QPPGKALEWLAR	1
Methyl	P06331	Immunoglobulin heavy variable 4-34	_VTISVDTSK[Methyl (KR)]	1
Methyl	P08603	Complement factor H	_QMSK[Methyl (KR)]YPSGER	1
Methyl	P06310	Immunoglobulin kappa variable 2-30	_DSGVPDRFSGSGSGTDFTLK[Methyl (KR)]	1
Methyl	A0A0C4DH31	Immunoglobulin heavy variable 1-18	_VTMTTDTSTSTAYMELR[Methyl (KR)]	1
Methyl	P01718	Immunoglobulin lambda variable 3-27	_DSER[Methyl (KR)]PSGIPER	1
Methyl	A0A075B7D0	Immunoglobulin heavy variable 1/OR15-1 (non-functional) (Fragment)	_QAPGQELGWM[Oxidation (M)]GR[Methyl (KR)]	2
Methyl	P01709	Immunoglobulin lambda variable 2-8	_LMIYEVSK[Methyl (KR)]RPSGVPDR	1
Methyl	P08603	Complement factor H	_SLGNVIM[Oxidation (M)]VC[Carbamidomethyl (C)]R[Methyl (KR)]	3
Methyl	P04211	Immunoglobulin lambda variable 7-43	_ALIYSTSNK[Methyl (KR)]	1
Methyl	P01705	Immunoglobulin lambda variable 2-23	_LMIYEGSK[dimethyl (KR)]	1
Methyl	P23083	Immunoglobulin heavy variable 1-2	_DTSISTAYMELSR[dimethyl (KR)]	1
Methyl	A0A087WSY6	Immunoglobulin kappa variable 3D-15	_LLIYGASIR[Methyl (KR)]	1
Methyl	P06331	Immunoglobulin heavy variable 4-34	_VTISVDTSK[dimethyl (KR)]NQFSLK	1
Methyl	P01766	Immunoglobulin heavy variable 3-13	_AGDTAVYYC[Carbamidomethyl (C)]AR[dimethyl (KR)]	2
Methyl	P01597;P04432	Immunoglobulin kappa variable 1-39;Immunoglobulin kappa variable 1D-39	_ASQSISSYLNWYQQK[Methyl (KR)]PGKAPK	1
Methyl	A0A0J9YVT0;P0DP02	Immunoglobulin heavy variable 3-33 (Fragment);Immunoglobulin heavy variable 3-30-3	_NTLYLQMNSLR[Methyl (KR)]	1
Methyl	P01834	Immunoglobulin kappa constant	_R[Methyl (KR)]TVAAPSVFIFPPSDEQLKSGTASVVC[Carbamidomethyl (C)]LLNNFYPR	2
Methyl	A0A0C4DH72	Immunoglobulin kappa variable 1-6	_LLIYAASSLQSGVPSR[dimethyl (KR)]	1
Methyl	P01871	Immunoglobulin heavy constant mu	_ESDWLGQSM[Oxidation (M)]FTC[Carbamidomethyl (C)]R[Methyl (KR)]	3
Methyl	A0A0G2JRQ6	Uncharacterized protein (Fragment)	_LLLYAASR[Methyl (KR)]	1
Methyl	P01706	Immunoglobulin lambda variable 2-11	_LM[Oxidation (M)]IYDVSK[dimethyl (KR)]	2
Methyl	P06310	Immunoglobulin kappa variable 2-30	_VSNR[Methyl (KR)]DSGVPDRFSGSGSGTDFTLK	1
Methyl	P01860	Immunoglobulin heavy constant gamma 3	_TPEVTC[Carbamidomethyl (C)]VVVDVSHEDPEVQFK[Methyl (KR)]	2
Methyl	A0A075B6Q5	Immunoglobulin heavy variable 3-64	_DNSKNTLYLQMGSLR[dimethyl (KR)]	1
Methyl	P01703	Immunoglobulin lambda variable 1-40	_LLIYGNSNR[Methyl (KR)]PSGVPDRFSGSK[Methyl (KR)]	2
Methyl	P01704	Immunoglobulin lambda variable 2-14	_LMIYEVSNRPSGVSNR[Methyl (KR)]	1
Methyl	P01718	Immunoglobulin lambda variable 3-27	_WFQQKPGQAPVLVIYK[Methyl (KR)]	1
Methyl	A0A0B4J231;B9A064	Immunoglobulin lambda-like polypeptide 5	_ANPTVTLFPPSSEELQANK[dimethyl (KR)]	1
Methyl	Q14624	Inter-alpha-trypsin inhibitor heavy chain H4	_AEAQAQYSAAVAK[dimethyl (KR)]	1
Methyl	P01593;P01594	Immunoglobulin kappa variable 1D-33;Immunoglobulin kappa variable 1-33	_LLIYDASNLETGVPSR[Methyl (KR)]	1
Methyl	P01857	Immunoglobulin heavy constant gamma 1	_LTVDKSR[Methyl (KR)]WQQGNVFSC[Carbamidomethyl (C)]SVMHEALHNHYTQK	2
Methyl	A0A0J9YVT0;P0DP02	Immunoglobulin heavy variable 3-33 (Fragment);Immunoglobulin heavy variable 3-30-3	_DNSKNTLYLQMNSLR[Methyl (KR)]	1
Methyl	A0A0J9YVT0;P0DP02	Immunoglobulin heavy variable 3-33 (Fragment);Immunoglobulin heavy variable 3-30-3	_GRFTISRDNSK[Methyl (KR)]	1
Methyl	A0A075B6K5	Immunoglobulin lambda variable 3-9	_FSGSNSGNTATLTISR[dimethyl (KR)]	1
Methyl	P01601	Immunoglobulin kappa variable 1D-16 (Fragment)	_SLIYAASSLQSGVPSR[Methyl (KR)]	1
Methyl	A0A0B4J1X5	Immunoglobulin heavy variable 3-74	_INSDGSSTSYADSVK[Methyl (KR)]	1
Methyl	P04433	Immunoglobulin kappa variable 3-11	_LLIYDASNR[Methyl (KR)]	1
Methyl	A0A075B6K5	Immunoglobulin lambda variable 3-9	_DSNR[Methyl (KR)]PSGIPER	1
Methyl	P01703	Immunoglobulin lambda variable 1-40	_LLIYGNSNR[Methyl (KR)]PSGVPDR[Methyl (KR)]FSGSK	2
Methyl	P02768	Serum albumin	_ETYGEMADC[Carbamidomethyl (C)]C[Carbamidomethyl (C)]AK[dimethyl (KR)]	3
Methyl	P01714	Immunoglobulin lambda variable 3-19	_ITC[Carbamidomethyl (C)]QGDSLR[Methyl (KR)]	2
Methyl	P01699	Immunoglobulin lambda variable 1-44	_LLIYSNNQR[Methyl (KR)]PSGVPDR	1
Methyl	P01701	Immunoglobulin lambda variable 1-51	_VTISC[Carbamidomethyl (C)]SGSSSNIGNNYVSWYQQLPGTAPK[Methyl (KR)]	2
Methyl	P01709	Immunoglobulin lambda variable 2-8	_LMIYEVSKR[Methyl (KR)]PSGVPDR	1
Methyl	P01706	Immunoglobulin lambda variable 2-11	_RPSGVPDR[Methyl (KR)]FSGSK	1
Methyl	P06331	Immunoglobulin heavy variable 4-34	_SR[Methyl (KR)]VTISVDTSK	1
Methyl	A0A087WSY4	Immunoglobulin heavy variable 4-30-2	_VTISVDR[Methyl (KR)]	1
Methyl	P01861	Immunoglobulin heavy constant gamma 4	_GQPREPQVYTLPPSQEEMTK[dimethyl (KR)]NQVSLTC[Carbamidomethyl (C)]LVK	2
Methyl	P02787	Serotransferrin	_SM[Oxidation (M)]GGK[Methyl (KR)]EDLIWELLNQAQEHFGK	2
Methyl	P01703	Immunoglobulin lambda variable 1-40	_LLIYGNSNR[dimethyl (KR)]PSGVPDR	1
Methyl	P01009	Alpha-1-antitrypsin	_RLGMFNIQHC[Carbamidomethyl (C)]K[dimethyl (KR)]	2
Methyl	A0A0A0MS14	Immunoglobulin heavy variable 1-45	_SEDTAM[Oxidation (M)]YYC[Carbamidomethyl (C)]AR[Methyl (KR)]	3
Methyl	P01704	Immunoglobulin lambda variable 2-14	_LM[Oxidation (M)]IYEVSNR[Methyl (KR)]PSGVSNR	2
Methyl	A0A0C4DH31	Immunoglobulin heavy variable 1-18	_ASGYTFTSYGISWVR[Methyl (KR)]	1
Methyl	P04430	Immunoglobulin kappa variable 1-16	_SLIYAASSLQSGVPSK[Methyl (KR)]	1
Methyl	P04430	Immunoglobulin kappa variable 1-16	_ASQGISNYLAWFQQKPGK[dimethyl (KR)]APK	1
Methyl	P02768	Serum albumin	_SLHTLFGDK[Methyl (KR)]LC[Carbamidomethyl (C)]TVATLR	2
Methyl	P02790	Hemopexin	_EWFWDLATGTMK[Methyl (KR)]	1
Methyl	A0A0C4DH31	Immunoglobulin heavy variable 1-18	_ASGYTFTSYGISWVR[dimethyl (KR)]	1
Methyl	P01742	Immunoglobulin heavy variable 1-69	_VTITADKSTSTAYMELSSLR[Methyl (KR)]	1
Methyl	A0A0J9YVT0;P0DP02	Immunoglobulin heavy variable 3-33 (Fragment);Immunoglobulin heavy variable 3-30-3	_NTLYLQM[Oxidation (M)]NSLR[Methyl (KR)]	2
Methyl	P01701	Immunoglobulin lambda variable 1-51	_LLIYDNNKRPSGIPDR[Methyl (KR)]	1
Methyl	P01706	Immunoglobulin lambda variable 2-11	_SVSGSPGQSVTISC[Carbamidomethyl (C)]TGTSSDVGGYNYVSWYQQHPGK[Methyl (KR)]APK	2
Methyl	P02766	Transthyretin	_YTIAALLSPYSYSTTAVVTNPK[Methyl (KR)]E	1
Methyl	P23083	Immunoglobulin heavy variable 1-2	_SDDTAVYYC[Carbamidomethyl (C)]AR[Methyl (KR)]	2
Methyl	P02768	Serum albumin	_K[Methyl (KR)]VPQVSTPTLVEVSR	1
Methyl	P06310	Immunoglobulin kappa variable 2-30	_DSGVPDR[Methyl (KR)]FSGSGSGTDFTLK	1
Methyl	A0A0C4DH32	Immunoglobulin heavy variable 3-20	_AEDTALYHC[Carbamidomethyl (C)]AR[dimethyl (KR)]	2
Methyl	A0A0J9YX35	Immunoglobulin heavy variable 3-64D	_AEDTAVYYC[Carbamidomethyl (C)]VK[Methyl (KR)]	2
Methyl	A0A0C4DH68	Immunoglobulin kappa variable 2-24	_FSGVPDR[dimethyl (KR)]	1
Methyl	P01704	Immunoglobulin lambda variable 2-14	_LMIYEVSNR[Methyl (KR)]PSGVSNR[Methyl (KR)]	2
Methyl	P02768	Serum albumin	_VFDEFK[Methyl (KR)]PLVEEPQNLIK[dimethyl (KR)]QNC[Carbamidomethyl (C)]ELFEQLGEYK	3
Methyl	A0A075B6K4	Immunoglobulin lambda variable 3-10	_SGQAPVLVIYEDSK[Methyl (KR)]RPSGIPER	1
Methyl	P02766	Transthyretin	_RYTIAALLSPYSYSTTAVVTNPK[Methyl (KR)]E	1
Methyl	P0C0L5	Complement C4-B	_SC[Carbamidomethyl (C)]GLHQLLR[Methyl (KR)]GPEVQLVAHSPWLKDSLSR	2
Methyl	P01701	Immunoglobulin lambda variable 1-51	_LLIYDNNK[Methyl (KR)]RPSGIPDR	1
Methyl	A0A0C4DH32	Immunoglobulin heavy variable 3-20	_AEDTALYHC[Carbamidomethyl (C)]AR[Methyl (KR)]	2
Methyl	A0A0B4J1X8	Immunoglobulin heavy variable 3-43	_TEDTALYYC[Carbamidomethyl (C)]AK[dimethyl (KR)]	2
Methyl	P01699	Immunoglobulin lambda variable 1-44	_LLIYSNNQR[dimethyl (KR)]PSGVPDR[dimethyl (KR)]FSGSK	2
Methyl	A0A0B4J1V6	Immunoglobulin heavy variable 3-73	_TEDTAVYYC[Carbamidomethyl (C)]TR[Methyl (KR)]	2
Methyl	A0A087X0Q4	Immunoglobulin kappa variable 2-40	_VEAEDVGVYYC[Carbamidomethyl (C)]MQR[Methyl (KR)]	2
Methyl	P02768	Serum albumin	_VFDEFK[Methyl (KR)]PLVEEPQNLIK	1
Methyl	P08603	Complement factor H	_R[dimethyl (KR)]PC[Carbamidomethyl (C)]GHPGDTPFGTFTLTGGNVFEYGVK	2
Methyl	P01857	Immunoglobulin heavy constant gamma 1	_FNWYVDGVEVHNAK[Methyl (KR)]	1
Methyl	P23083	Immunoglobulin heavy variable 1-2	_LRSDDTAVYYC[Carbamidomethyl (C)]AR[Methyl (KR)]	2
Methyl	P01817	Immunoglobulin heavy variable 2-5	_DTSKNQVVLTMTNMDPVDTATYYC[Carbamidomethyl (C)]AHR[dimethyl (KR)]	2
Methyl	A0A0B4J1V0	Immunoglobulin heavy variable 3-15	_SK[Methyl (KR)]TDGGTTDYAAPVKGR	1
Methyl	A0A0C4DH32	Immunoglobulin heavy variable 3-20	_LSC[Carbamidomethyl (C)]AASGFTFDDYGMSWVR[Methyl (KR)]	2
Methyl	A0A0B4J1X8	Immunoglobulin heavy variable 3-43	_LSC[Carbamidomethyl (C)]AASGFTFDDYTMHWVR[Methyl (KR)]	2
Methyl	A0A0A0MS15	Immunoglobulin heavy variable 3-49	_AYGGTTEYAASVK[Methyl (KR)]	1
Methyl	P01780	Immunoglobulin heavy variable 3-7	_GLEWVANIK[Methyl (KR)]	1
Methyl	P01599	Immunoglobulin kappa variable 1-17	_RLIYAASSLQSGVPSR[Methyl (KR)]	1
Methyl	A0A0C4DH68	Immunoglobulin kappa variable 2-24	_FSGVPDRFSGSGAGTDFTLK[Methyl (KR)]	1
Methyl	A0A0C4DH68	Immunoglobulin kappa variable 2-24	_FSGVPDR[Methyl (KR)]FSGSGAGTDFTLK	1
Methyl	P06310	Immunoglobulin kappa variable 2-30	_SSQSLVYSDGNTYLNWFQQR[Methyl (KR)]PGQSPR	1
Methyl	A0A075B6S2;A2NJV5	Immunoglobulin kappa variable 2D-29;Immunoglobulin kappa variable 2-29	_SSQSLLHSDGK[Methyl (KR)]	1
Methyl	P01619	Immunoglobulin kappa variable 3-20	_FSGSGSGTDFTLTISR[dimethyl (KR)]	1
Methyl	P01701	Immunoglobulin lambda variable 1-51	_RPSGIPDRFSGSK[Methyl (KR)]	1
Methyl	P01701	Immunoglobulin lambda variable 1-51	_VTISC[Carbamidomethyl (C)]SGSSSNIGNNYVSWYQQLPGTAPK[dimethyl (KR)]	2
Methyl	P01706	Immunoglobulin lambda variable 2-11	_LMIYDVSKR[Methyl (KR)]PSGVPDR	1
Methyl	A0A075B6K4	Immunoglobulin lambda variable 3-10	_SGQAPVLVIYEDSKR[Methyl (KR)]PSGIPER	1
Methyl	P01714	Immunoglobulin lambda variable 3-19	_SYYASWYQQK[Methyl (KR)]	1
Methyl	P01717	Immunoglobulin lambda variable 3-25	_QYAYWYQQK[Methyl (KR)]PGQAPVLVIYK	1
Methyl	A0A075B6H9	Immunoglobulin lambda variable 4-69	_LNSDGSHSK[Methyl (KR)]GDGIPDR	1
Methyl	A0A0G2JS06	Immunoglobulin lambda variable 5-39	_YKSDSDKQQGSGVPSR[Methyl (KR)]	1
Methyl	P02768	Serum albumin	_QTALVELVK[Methyl (KR)]	1
Methyl	P02768	Serum albumin	_LVNEVTEFAK[Methyl (KR)]	1
Methyl	P02768	Serum albumin	_SHC[Carbamidomethyl (C)]IAEVENDEMPADLPSLAADFVESK[Methyl (KR)]	2
Methyl	P02768	Serum albumin	_ETYGEMADC[Carbamidomethyl (C)]C[Carbamidomethyl (C)]AK[Methyl (KR)]	3
Methyl	A0A0B4J1X8	Immunoglobulin heavy variable 3-43	_DNSK[Methyl (KR)]NSLYLQMNSLR	1
Methyl	P0DOY2	Immunoglobulin lambda constant 2	_QSNNK[dimethyl (KR)]YAASSYLSLTPEQWK	1
Methyl	P01705	Immunoglobulin lambda variable 2-23	_LMIYEGSK[dimethyl (KR)]R[dimethyl (KR)]PSGVSNR	2
Methyl	P06331	Immunoglobulin heavy variable 4-34	_SR[Methyl (KR)]VTISVDTSKNQFSLK	1
Methyl	P01834	Immunoglobulin kappa constant	_VYAC[Carbamidomethyl (C)]EVTHQGLSSPVTK[Methyl (KR)]	2
Methyl	P01619	Immunoglobulin kappa variable 3-20	_ASQSVSSSYLAWYQQK[dimethyl (KR)]PGQAPR	1
Methyl	P01706	Immunoglobulin lambda variable 2-11	_RPSGVPDR[Methyl (KR)]	1
Methyl	A0A0C4DH38	Immunoglobulin heavy variable 5-51	_SISTAYLQWSSLK[Methyl (KR)]	1
Methyl	P02743	Serum amyloid P-component	_GYVIIK[Methyl (KR)]PLVWV	1
Methyl	P01857	Immunoglobulin heavy constant gamma 1	_THTC[Carbamidomethyl (C)]PPC[Carbamidomethyl (C)]PAPELLGGPSVFLFPPK[Methyl (KR)]PK	3
Methyl	A0A075B6I0	Immunoglobulin lambda variable 8-61	_TLIYSTNTR[Methyl (KR)]	1
Methyl	P02768	Serum albumin	_AEFAEVSK[Methyl (KR)]	1
Methyl	P0DOY2	Immunoglobulin lambda constant 2	_AAPSVTLFPPSSEELQANK[dimethyl (KR)]	1
Methyl	A0A0C4DH31	Immunoglobulin heavy variable 1-18	_VTMTTDTSTSTAYMELR[dimethyl (KR)]	1
Methyl	P02768	Serum albumin	_FK[Methyl (KR)]DLGEENFK	1
Methyl	P0DOY2	Immunoglobulin lambda constant 2	_AGVETTTPSK[Methyl (KR)]	1
Methyl	P01857	Immunoglobulin heavy constant gamma 1	_WQQGNVFSC[Carbamidomethyl (C)]SVM[Oxidation (M)]HEALHNHYTQK[Methyl (KR)]	3
Methyl	A0A0B4J2B5	Immunoglobulin heavy variable 3/OR16-9 (non-functional) (Fragment)	_EVQLVESGGGLVQPGGSLR[Methyl (KR)]	1
Methyl	A0A0C4DH68	Immunoglobulin kappa variable 2-24	_FSGVPDR[Methyl (KR)]	1
Methyl	A0A075B6K4	Immunoglobulin lambda variable 3-10	_ITC[Carbamidomethyl (C)]SGDALPK[dimethyl (KR)]	2
Methyl	P02768	Serum albumin	_ADDK[dimethyl (KR)]ETC[Carbamidomethyl (C)]FAEEGKK	2
Methyl	P0DOY2	Immunoglobulin lambda constant 2	_SYSC[Carbamidomethyl (C)]QVTHEGSTVEK[Methyl (KR)]	2
Methyl	A0A0B4J1Y9	Immunoglobulin heavy variable 3-72	_TEDTAVYYC[Carbamidomethyl (C)]AR[Methyl (KR)]	2
Methyl	P01619	Immunoglobulin kappa variable 3-20	_ASQSVSSSYLAWYQQK[Methyl (KR)]PGQAPR	1
Methyl	P01619	Immunoglobulin kappa variable 3-20	_ATGIPDR[Methyl (KR)]FSGSGSGTDFTLTISR	1
Methyl	P01703	Immunoglobulin lambda variable 1-40	_LLIYGNSNR[dimethyl (KR)]PSGVPDRFSGSK	1
Methyl	A0A096LPE2	SAA2-SAA4 readthrough	_GNYDAAQR[dimethyl (KR)]GPGGVWAAK	1
Methyl	P01718	Immunoglobulin lambda variable 3-27	_ITC[Carbamidomethyl (C)]SGDVLAK[Methyl (KR)]	2
Methyl	P0C0L5	Complement C4-B	_YR[Methyl (KR)]VFALDQK	1
Methyl	A0A0G2JMI3	Immunoglobulin heavy variable 1-69-2	_GLEWMGLVDPEDGETIYAEK[Methyl (KR)]	1
Methyl	A0A0C4DH43	Immunoglobulin heavy variable 2-70D	_IDWDDDK[Methyl (KR)]FYSTSLK	1
Methyl	A0A0A0MS15	Immunoglobulin heavy variable 3-49	_SIAYLQMNSLK[Methyl (KR)]	1
Methyl	P01782	Immunoglobulin heavy variable 3-9	_NSLYLQM[Oxidation (M)]NSLR[Methyl (KR)]	2
Methyl	A0A0C4DH38	Immunoglobulin heavy variable 5-51	_QMPGKGLEWMGIIYPGDSDTR[Methyl (KR)]	1
Methyl	A0A0C4DH38	Immunoglobulin heavy variable 5-51	_ASDTAMYYC[Carbamidomethyl (C)]AR[Methyl (KR)]	2
Methyl	P01602	Immunoglobulin kappa variable 1-5	_ASQSISSWLAWYQQKPGK[dimethyl (KR)]APK	1
Methyl	P01593;P01594	Immunoglobulin kappa variable 1D-33;Immunoglobulin kappa variable 1-33	_VTITC[Carbamidomethyl (C)]QASQDISNYLNWYQQK[Methyl (KR)]PGKAPK	2
Methyl	A0A075B6P5;P01615	Immunoglobulin kappa variable 2-28;Immunoglobulin kappa variable 2D-28	_SSQSLLHSNGYNYLDWYLQKPGQSPQLLIYLGSNR[Methyl (KR)]	1
Methyl	P06310	Immunoglobulin kappa variable 2-30	_VSNR[Methyl (KR)]DSGVPDR	1
Methyl	P04433	Immunoglobulin kappa variable 3-11	_LLIYDASNR[dimethyl (KR)]ATGIPAR	1
Methyl	P01699	Immunoglobulin lambda variable 1-44	_LLIYSNNQRPSGVPDR[Methyl (KR)]	1
Methyl	P01699	Immunoglobulin lambda variable 1-44	_LLIYSNNQRPSGVPDR[Methyl (KR)]FSGSK	1
Methyl	P01699	Immunoglobulin lambda variable 1-44	_LLIYSNNQR[dimethyl (KR)]PSGVPDR[Methyl (KR)]FSGSK[Methyl (KR)]	3
Methyl	P01704	Immunoglobulin lambda variable 2-14	_LMIYEVSNR[dimethyl (KR)]PSGVSNR[Methyl (KR)]	2
Methyl	P01705	Immunoglobulin lambda variable 2-23	_LMIYEGSK[dimethyl (KR)]R[dimethyl (KR)]PSGVSNR[Methyl (KR)]	3
Methyl	P01714	Immunoglobulin lambda variable 3-19	_SYYASWYQQKPGQAPVLVIYGK[Methyl (KR)]	1
Methyl	A0A075B6H9	Immunoglobulin lambda variable 4-69	_GDGIPDRFSGSSSGAER[Methyl (KR)]	1
Methyl	P02768	Serum albumin	_KVPQVSTPTLVEVSR[Methyl (KR)]	1
Methyl	P02768	Serum albumin	_SHC[Carbamidomethyl (C)]IAEVENDEMPADLPSLAADFVESK[dimethyl (KR)]DVC[Carbamidomethyl (C)]K	3
Methyl	A0A075B6K2	Immunoglobulin lambda variable 3-12	_PSGIPER[dimethyl (KR)]FSGSNPGNTATLTISR	1
Methyl	A0A075B6K5	Immunoglobulin lambda variable 3-9	_ITC[Carbamidomethyl (C)]GGNNIGSK[Methyl (KR)]	2
Methyl	P23083	Immunoglobulin heavy variable 1-2	_DTSISTAYM[Oxidation (M)]ELSR[Methyl (KR)]	2
Methyl	A0A0J9YX35	Immunoglobulin heavy variable 3-64D	_NTLYLQM[Oxidation (M)]SSLR[Methyl (KR)]	2
Methyl	P01706	Immunoglobulin lambda variable 2-11	_LM[Oxidation (M)]IYDVSK[Methyl (KR)]	2
Methyl	P01703	Immunoglobulin lambda variable 1-40	_LLIYGNSNR[Methyl (KR)]PSGVPDR	1
Methyl	P23083	Immunoglobulin heavy variable 1-2	_LR[dimethyl (KR)]SDDTAVYYC[Carbamidomethyl (C)]AR	2
Methyl	A0A087WSY6	Immunoglobulin kappa variable 3D-15	_LLIYGASIR[dimethyl (KR)]	1
Methyl	A0A087X0Q4	Immunoglobulin kappa variable 2-40	_ASGVPDRFSGSGSGTDFTLK[Methyl (KR)]	1
Methyl	D6RF35	Vitamin D-binding protein	_LKAK[Methyl (KR)]LPDATPTELAK	1
Methyl	P06331	Immunoglobulin heavy variable 4-34	_SRVTISVDTSK[Methyl (KR)]	1
Methyl	A0A0C4DH68	Immunoglobulin kappa variable 2-24	_FSGSGAGTDFTLK[dimethyl (KR)]	1
Methyl	P02790	Hemopexin	_SLGPNSC[Carbamidomethyl (C)]SANGPGLYLIHGPNLYC[Carbamidomethyl (C)]YSDVEK[Methyl (KR)]LNAAK	3
Methyl	A0A075B7D0	Immunoglobulin heavy variable 1/OR15-1 (non-functional) (Fragment)	_INPNSGGTNYAQK[Methyl (KR)]	1
Methyl	P23083	Immunoglobulin heavy variable 1-2	_SDDTAVYYC[Carbamidomethyl (C)]AR[dimethyl (KR)]	2
Methyl	A0A075B6Q5	Immunoglobulin heavy variable 3-64	_DNSKNTLYLQMGSLR[Methyl (KR)]	1
Methyl	P01782	Immunoglobulin heavy variable 3-9	_FTISRDNAK[dimethyl (KR)]	1
Methyl	A0A075B6R2	Immunoglobulin heavy variable 4-4	_GLEWIGEIYHSGSTNYNPSLK[Methyl (KR)]	1
Methyl	A0A0B4J1U7	Immunoglobulin heavy variable 6-1	_WYNDYAVSVK[Methyl (KR)]	1
Methyl	P01718	Immunoglobulin lambda variable 3-27	_DSER[dimethyl (KR)]PSGIPER	1
Methyl	P01599	Immunoglobulin kappa variable 1-17	_LIYAASSLQSGVPSR[Methyl (KR)]	1
Methyl	A0A0C4DH31	Immunoglobulin heavy variable 1-18	_SLR[Methyl (KR)]SDDTAVYYC[Carbamidomethyl (C)]AR[dimethyl (KR)]	3
Methyl	A0A0J9YVT0;P0DP02	Immunoglobulin heavy variable 3-33 (Fragment);Immunoglobulin heavy variable 3-30-3	_FTISRDNSK[Methyl (KR)]	1
Methyl	P01619	Immunoglobulin kappa variable 3-20	_ATGIPDR[Methyl (KR)]FSGSGSGTDFTLTISR[Methyl (KR)]	2
Methyl	P00747	Plasminogen	_R[dimethyl (KR)]ATTVTGTPC[Carbamidomethyl (C)]QDWAAQEPHR	2
Methyl	A0A075B7B8	Immunoglobulin heavy variable 3/OR16-12 (non-functional) (Fragment)	_VEDTAVYYC[Carbamidomethyl (C)]AR[dimethyl (KR)]	2
Methyl	P01599	Immunoglobulin kappa variable 1-17	_R[Methyl (KR)]LIYAASSLQSGVPSR	1
Methyl	P01834	Immunoglobulin kappa constant	_TVAAPSVFIFPPSDEQLK[Methyl (KR)]SGTASVVC[Carbamidomethyl (C)]LLNNFYPR	2
Methyl	P01009	Alpha-1-antitrypsin	_AVLTIDEK[dimethyl (KR)]GTEAAGAMFLEAIPMSIPPEVK	1
Methyl	P01024	Complement C3	_IWDVVEKADIGC[Carbamidomethyl (C)]TPGSGK[Methyl (KR)]DYAGVFSDAGLTFTSSSGQQTAQR	2
Methyl	P06310	Immunoglobulin kappa variable 2-30	_DSGVPDR[dimethyl (KR)]FSGSGSGTDFTLK	1
Methyl	P02787	Serotransferrin	_SM[Oxidation (M)]GGK[Methyl (KR)]EDLIWELLNQAQEHFGKDK	2
Methyl	P02768	Serum albumin	_ADDK[Methyl (KR)]ETC[Carbamidomethyl (C)]FAEEGKK	2
Methyl	P01699	Immunoglobulin lambda variable 1-44	_LLIYSNNQR[Methyl (KR)]PSGVPDRFSGSK	1
Methyl	P02768	Serum albumin	_AEFAEVSK[dimethyl (KR)]LVTDLTK	1
Methyl	A0A075B7D0	Immunoglobulin heavy variable 1/OR15-1 (non-functional) (Fragment)	_SEDTATYYC[Carbamidomethyl (C)]AR[Methyl (KR)]	2
Methyl	A0A0B4J2B5	Immunoglobulin heavy variable 3/OR16-9 (non-functional) (Fragment)	_EVQLVESGGGLVQPGGSLR[dimethyl (KR)]	1
Methyl	P01857	Immunoglobulin heavy constant gamma 1	_GPSVFPLAPSSK[dimethyl (KR)]	1
Methyl	A0A0J9YVT0;P0DP02	Immunoglobulin heavy variable 3-33 (Fragment);Immunoglobulin heavy variable 3-30-3	_GRFTISR[Methyl (KR)]	1
Methyl	P01701	Immunoglobulin lambda variable 1-51	_LLIYDNNKR[Methyl (KR)]PSGIPDR	1
Methyl	P01834	Immunoglobulin kappa constant	_VDNALQSGNSQESVTEQDSK[Methyl (KR)]DSTYSLSSTLTLSK	1
Methyl	P0C0L5	Complement C4-B	_ASSFLGEK[dimethyl (KR)]ASAGLLGAHAAAITAYALTLTKAPADLR	1
Methyl	P01703	Immunoglobulin lambda variable 1-40	_LLIYGNSNR[Methyl (KR)]	1
Methyl	A0A075B7D8	Immunoglobulin heavy variable 3/OR15-7 (pseudogene) (Fragment)	_TEDLAVYYC[Carbamidomethyl (C)]AR[dimethyl (KR)]	2
Methyl	A0A0C4DH34	Immunoglobulin heavy variable 4-28	_SR[Methyl (KR)]VTMSVDTSK	1
Methyl	A0A0C4DH38	Immunoglobulin heavy variable 5-51	_ASDTAMYYC[Carbamidomethyl (C)]AR[dimethyl (KR)]	2
Methyl	A0A0C4DFP6;Q9NQ79;Q9NQ79-2	Cartilage acidic protein 1;Cartilage acidic protein 1;Isoform 2 of Cartilage acidic protein 1	_LYLQMSTHGK[Methyl (KR)]	1
Methyl	P0DOY3	Immunoglobulin lambda constant 3	_SHK[Methyl (KR)]SYSC[Carbamidomethyl (C)]QVTHEGSTVEK	2
Methyl	P01624	Immunoglobulin kappa variable 3-15	_ATLSC[Carbamidomethyl (C)]R[Methyl (KR)]ASQSVSSNLAWYQQKPGQAPR	2
Methyl	P02768	Serum albumin	_LK[Methyl (KR)]EC[Carbamidomethyl (C)]C[Carbamidomethyl (C)]EKPLLEK	3
Methyl	A0A075B6K5	Immunoglobulin lambda variable 3-9	_NVHWYQQK[Methyl (KR)]PGQAPVLVIYR	1
Methyl	A0A0C4DH31	Immunoglobulin heavy variable 1-18	_VTMTTDTSTSTAYM[Oxidation (M)]ELR[Methyl (KR)]	2
Methyl	P01703	Immunoglobulin lambda variable 1-40	_LLIYGNSNR[dimethyl (KR)]	1
Methyl	P02768	Serum albumin	_LVR[Methyl (KR)]PEVDVMC[Carbamidomethyl (C)]TAFHDNEETFLKK	2
Methyl	P02749	Beta-2-glycoprotein 1	_ASC[Carbamidomethyl (C)]K[Methyl (KR)]VPVKK	2
Methyl	A0A075B6H9	Immunoglobulin lambda variable 4-69	_FSGSSSGAER[Methyl (KR)]	1
Methyl	A0A0A0MT36	Immunoglobulin kappa variable 6D-21	_LLIK[Methyl (KR)]YASQSISGVPSR	1
Methyl	A0A075B7E8	Immunoglobulin heavy variable 3/OR16-13 (non-functional) (Fragment)	_DNAK[dimethyl (KR)]NTLYLQMNSLR	1
Methyl	P02768	Serum albumin	_LK[dimethyl (KR)]EC[Carbamidomethyl (C)]C[Carbamidomethyl (C)]EKPLLEK	3
Methyl	A0A0J9YX35	Immunoglobulin heavy variable 3-64D	_DNSKNTLYLQMSSLR[Methyl (KR)]	1
Methyl	P23083	Immunoglobulin heavy variable 1-2	_LRSDDTAVYYC[Carbamidomethyl (C)]AR[dimethyl (KR)]	2
Methyl	A0A075B6J9	Immunoglobulin lambda variable 2-18	_LMIYEVSNR[Methyl (KR)]PSGVPDR	1
Methyl	P02768	Serum albumin	_RMPC[Carbamidomethyl (C)]AEDYLSVVLNQLC[Carbamidomethyl (C)]VLHEK[Methyl (KR)]	3
Methyl	P01859	Immunoglobulin heavy constant gamma 2	_VSNK[Methyl (KR)]GLPAPIEK	1
Methyl	P01714	Immunoglobulin lambda variable 3-19	_SYYASWYQQK[Methyl (KR)]PGQAPVLVIYGK	1
Methyl	P02768	Serum albumin	_TC[Carbamidomethyl (C)]VADESAENC[Carbamidomethyl (C)]DK[dimethyl (KR)]	3
Methyl	P04196	Histidine-rich glycoprotein	_VRGGEGTGYFVDFSVR[Methyl (KR)]	1
Methyl	P04430	Immunoglobulin kappa variable 1-16	_ASQGISNYLAWFQQK[dimethyl (KR)]PGKAPK	1
Methyl	A0A075B7D0	Immunoglobulin heavy variable 1/OR15-1 (non-functional) (Fragment)	_SEDTATYYC[Carbamidomethyl (C)]AR[dimethyl (KR)]	2
Methyl	P01782	Immunoglobulin heavy variable 3-9	_LSC[Carbamidomethyl (C)]AASGFTFDDYAMHWVR[Methyl (KR)]	2
Methyl	A0A075B6H9	Immunoglobulin lambda variable 4-69	_LNSDGSHSK[Methyl (KR)]GDGIPDRFSGSSSGAER	1
Methyl	P01602	Immunoglobulin kappa variable 1-5	_ASQSISSWLAWYQQK[Methyl (KR)]PGKAPK	1
Methyl	P01715	Immunoglobulin lambda variable 3-1	_YAC[Carbamidomethyl (C)]WYQQKPGQSPVLVIYQDSK[Methyl (KR)]	2
Methyl	D6RF35	Vitamin D-binding protein	_AK[Methyl (KR)]LPDATPTELAK	1
Methyl	A0A0C4DH31	Immunoglobulin heavy variable 1-18	_SLR[dimethyl (KR)]SDDTAVYYC[Carbamidomethyl (C)]AR	2
Methyl	A0A0B4J1X8	Immunoglobulin heavy variable 3-43	_TEDTALYYC[Carbamidomethyl (C)]AK[Methyl (KR)]	2
Methyl	P02768	Serum albumin	_RPC[Carbamidomethyl (C)]FSALEVDETYVPK[Methyl (KR)]	2
Methyl	P01703	Immunoglobulin lambda variable 1-40	_LLIYGNSNRPSGVPDRFSGSK[Methyl (KR)]	1
Methyl	A0A0B4J1Y9	Immunoglobulin heavy variable 3-72	_NSLYLQM[Oxidation (M)]NSLK[Methyl (KR)]	2
Methyl	P01834	Immunoglobulin kappa constant	_ADYEKHK[Methyl (KR)]VYAC[Carbamidomethyl (C)]EVTHQGLSSPVTK	2
Methyl	A0A0C4DH72	Immunoglobulin kappa variable 1-6	_NDLGWYQQK[Methyl (KR)]PGKAPK	1
Methyl	P01619	Immunoglobulin kappa variable 3-20	_ATGIPDR[dimethyl (KR)]FSGSGSGTDFTLTISR	1
Methyl	A0A0C4DH72	Immunoglobulin kappa variable 1-6	_NDLGWYQQK[Methyl (KR)]PGK	1
Methyl	P01857	Immunoglobulin heavy constant gamma 1	_WQQGNVFSC[Carbamidomethyl (C)]SVMHEALHNHYTQK[Methyl (KR)]	2
Methyl	P01782	Immunoglobulin heavy variable 3-9	_AEDTALYYC[Carbamidomethyl (C)]AK[dimethyl (KR)]	2
Methyl	P01871	Immunoglobulin heavy constant mu	_YAATSQVLLPSK[Methyl (KR)]DVMQGTDEHVVC[Carbamidomethyl (C)]K	2
Methyl	F8WA39;H0YDX3;Q13613;Q13613-2;Q8NEC6	Myotubularin-related protein 1;Myotubularin-related protein 1 (Fragment);Myotubularin-related protein 1;Isoform 1A of Myotubularin-related protein 1;MTMR1 protein	_LIIFDAR[dimethyl (KR)]	1
Methyl	P06310	Immunoglobulin kappa variable 2-30	_DSGVPDR[Methyl (KR)]	1
Methyl	A0A0B4J1Y9	Immunoglobulin heavy variable 3-72	_FTISRDDSK[Methyl (KR)]	1
Methyl	P01599	Immunoglobulin kappa variable 1-17	_R[dimethyl (KR)]LIYAASSLQSGVPSR	1
Methyl	P01601	Immunoglobulin kappa variable 1D-16 (Fragment)	_SLIYAASSLQSGVPSR[dimethyl (KR)]	1
Methyl	P01706	Immunoglobulin lambda variable 2-11	_LMIYDVSK[Methyl (KR)]	1
Methyl	P01624	Immunoglobulin kappa variable 3-15	_ASQSVSSNLAWYQQK[Methyl (KR)]PGQAPR	1
Methyl	P0DOY2	Immunoglobulin lambda constant 2	_AAPSVTLFPPSSEELQANK[dimethyl (KR)]ATLVC[Carbamidomethyl (C)]LISDFYPGAVTVAWK	2
Methyl	P02768	Serum albumin	_NEC[Carbamidomethyl (C)]FLQHK[dimethyl (KR)]DDNPNLPR	2
Methyl	P00738	Haptoglobin	_VTSIQDWVQK[Methyl (KR)]	1
Methyl	P23083	Immunoglobulin heavy variable 1-2	_LR[Methyl (KR)]SDDTAVYYC[Carbamidomethyl (C)]AR[dimethyl (KR)]	3
Methyl	A0A0B4J1Y9	Immunoglobulin heavy variable 3-72	_NK[dimethyl (KR)]ANSYTTEYAASVK	1
Methyl	P01597;P04432	Immunoglobulin kappa variable 1-39;Immunoglobulin kappa variable 1D-39	_ASQSISSYLNWYQQK[dimethyl (KR)]PGKAPK	1
Methyl	P01624	Immunoglobulin kappa variable 3-15	_ASQSVSSNLAWYQQK[dimethyl (KR)]PGQAPR	1
Methyl	A0A075B6K5	Immunoglobulin lambda variable 3-9	_ITC[Carbamidomethyl (C)]GGNNIGSK[dimethyl (KR)]	2
Methyl	A0A0J9YY99	Uncharacterized protein (Fragment)	_YDGSNK[Methyl (KR)]YYADSVK	1
Methyl	A0A0C4DH38	Immunoglobulin heavy variable 5-51	_YSPSFQGQVTISADK[dimethyl (KR)]	1
Methyl	A0A0B4J2D9;P0DP09	Immunoglobulin kappa variable 1D-13;Immunoglobulin kappa variable 1-13	_ASQGISSALAWYQQK[Methyl (KR)]PGKAPK	1
Methyl	P02749	Beta-2-glycoprotein 1	_ASC[Carbamidomethyl (C)]K[Methyl (KR)]VPVK	2
Methyl	P80748	Immunoglobulin lambda variable 3-21	_SVHWYQQKPGQAPVLVVYDDSDR[Methyl (KR)]PSGIPER	1
Methyl	P02768	Serum albumin	_R[Methyl (KR)]MPC[Carbamidomethyl (C)]AEDYLSVVLNQLC[Carbamidomethyl (C)]VLHEKTPVSDR	3
Methyl	A0A0G2JMB2	Immunoglobulin heavy constant alpha 2 (Fragment)	_SGNTFR[dimethyl (KR)]PEVHLLPPPSEELALNELVTLTC[Carbamidomethyl (C)]LAR	2
Methyl	A0A0B4J2D9;P0DP09	Immunoglobulin kappa variable 1D-13;Immunoglobulin kappa variable 1-13	_LLIYDASSLESGVPSR[Methyl (KR)]	1
Methyl	A0A0C4DH31	Immunoglobulin heavy variable 1-18	_SLRSDDTAVYYC[Carbamidomethyl (C)]AR[dimethyl (KR)]	2
Methyl	P01703	Immunoglobulin lambda variable 1-40	_LLIYGNSNR[Methyl (KR)]PSGVPDRFSGSK	1
Methyl	P01861	Immunoglobulin heavy constant gamma 4	_EPQVYTLPPSQEEMTK[dimethyl (KR)]NQVSLTC[Carbamidomethyl (C)]LVK	2
Methyl	A0A075B6S2;A2NJV5	Immunoglobulin kappa variable 2D-29;Immunoglobulin kappa variable 2-29	_FSGVPDR[Methyl (KR)]FSGSGSGTDFTLK	1
Methyl	P01705	Immunoglobulin lambda variable 2-23	_LMIYEGSK[Methyl (KR)]RPSGVSNR	1
Methyl	A0A0G2JS06	Immunoglobulin lambda variable 5-39	_SGINVGTYR[Methyl (KR)]	1
Methyl	A0A075B6I9	Immunoglobulin lambda variable 7-46	_TLIYDTSNK[dimethyl (KR)]	1
Methyl	P01834	Immunoglobulin kappa constant	_HK[Methyl (KR)]VYAC[Carbamidomethyl (C)]EVTHQGLSSPVTK	2
Methyl	P06331	Immunoglobulin heavy variable 4-34	_VTISVDTSK[Methyl (KR)]NQFSLK	1
Methyl	A0A0C4DH35	Immunoglobulin heavy variable 3-35 (non-functional) (Fragment)	_AEDTAVYYC[Carbamidomethyl (C)]VR[Methyl (KR)]	2
Methyl	P02768	Serum albumin	_RMPC[Carbamidomethyl (C)]AEDYLSVVLNQLC[Carbamidomethyl (C)]VLHEK[Methyl (KR)]TPVSDR	3
Methyl	P01701	Immunoglobulin lambda variable 1-51	_LLIYDNNK[Methyl (KR)]	1
Methyl	A0A0C4DH25	Immunoglobulin kappa variable 3D-20	_LLIYDASSR[dimethyl (KR)]	1
Methyl	P01871	Immunoglobulin heavy constant mu	_YAATSQVLLPSK[Methyl (KR)]DVM[Oxidation (M)]QGTDEHVVC[Carbamidomethyl (C)]K	3
Methyl	A0A0C4DH36	Immunoglobulin heavy variable 3-38 (non-functional) (Fragment)	_DNSKNTLYLQM[Oxidation (M)]NNLR[Methyl (KR)]AEGTAVYYC[Carbamidomethyl (C)]AR	3
Methyl	A0A087X0Q4	Immunoglobulin kappa variable 2-40	_ISR[Methyl (KR)]VEAEDVGVYYC[Carbamidomethyl (C)]MQR	2
Methyl	P04433	Immunoglobulin kappa variable 3-11	_ASQSVSSYLAWYQQK[dimethyl (KR)]PGQAPR	1
Methyl	P04211	Immunoglobulin lambda variable 7-43	_HSWTPAR[dimethyl (KR)]	1
Methyl	A0A075B6I0	Immunoglobulin lambda variable 8-61	_SSGVPDR[Methyl (KR)]FSGSILGNK	1
Methyl	P01602	Immunoglobulin kappa variable 1-5	_ASSLESGVPSR[Methyl (KR)]	1
Methyl	A0A075B6R2	Immunoglobulin heavy variable 4-4	_LSSVTAADTAVYYC[Carbamidomethyl (C)]AR[Methyl (KR)]	2
Methyl	A0A075B6J9	Immunoglobulin lambda variable 2-18	_LMIYEVSNR[Methyl (KR)]PSGVPDRFSGSK	1
Methyl	P0DOY2	Immunoglobulin lambda constant 2	_ADSSPVK[Methyl (KR)]AGVETTTPSK	1
Methyl	A0A075B6K4	Immunoglobulin lambda variable 3-10	_SGQAPVLVIYEDSK[Methyl (KR)]	1
Methyl	P02768	Serum albumin	_ATKEQLK[dimethyl (KR)]AVM[Oxidation (M)]DDFAAFVEK	2
Methyl	P06331	Immunoglobulin heavy variable 4-34	_SRVTISVDTSK[Methyl (KR)]NQFSLK	1
Methyl	P01024	Complement C3	_QVR[Methyl (KR)]EPGQDLVVLPLSITTDFIPSFR	1
Methyl	A0A075B6K5	Immunoglobulin lambda variable 3-9	_DSNR[dimethyl (KR)]PSGIPER	1
Methyl	P23083	Immunoglobulin heavy variable 1-2	_DTSISTAYMELSR[Methyl (KR)]	1
Methyl	A0A075B7B8	Immunoglobulin heavy variable 3/OR16-12 (non-functional) (Fragment)	_VEDTAVYYC[Carbamidomethyl (C)]AR[Methyl (KR)]	2
Methyl	P01834	Immunoglobulin kappa constant	_VDNALQSGNSQESVTEQDSK[dimethyl (KR)]DSTYSLSSTLTLSK	1
Methyl	P02768	Serum albumin	_EQLK[Methyl (KR)]AVM[Oxidation (M)]DDFAAFVEK	2
Methyl	P01859	Immunoglobulin heavy constant gamma 2	_VVSVLTVVHQDWLNGK[dimethyl (KR)]EYK	1
Methyl	P01861	Immunoglobulin heavy constant gamma 4	_EPQVYTLPPSQEEMTK[dimethyl (KR)]	1
Methyl	A0A0C4DH29	Immunoglobulin heavy variable 1-3	_VTITR[dimethyl (KR)]DTSASTAYMELSSLR	1
Methyl	A0A0J9YVT0;P0DP02	Immunoglobulin heavy variable 3-33 (Fragment);Immunoglobulin heavy variable 3-30-3	_YYADSVK[Methyl (KR)]	1
Methyl	A0A0C4DH67	Immunoglobulin kappa variable 1-8	_LLIYAASTLQSGVPSR[dimethyl (KR)]	1
Methyl	P06312	Immunoglobulin kappa variable 4-1	_LLIYWASTR[Methyl (KR)]	1
Methyl	A0A0J9YY99	Uncharacterized protein (Fragment)	_DNSKNTLYLQMNSLR[dimethyl (KR)]AEDTAVYYC[Carbamidomethyl (C)]AK	2
Methyl	P23083	Immunoglobulin heavy variable 1-2	_LR[Methyl (KR)]SDDTAVYYC[Carbamidomethyl (C)]AR	2
Methyl	A0A087X0Q4	Immunoglobulin kappa variable 2-40	_FSGSGSGTDFTLK[Methyl (KR)]	1
Methyl	P01706	Immunoglobulin lambda variable 2-11	_LMIYDVSK[Methyl (KR)]RPSGVPDR	1
Methyl	P01619	Immunoglobulin kappa variable 3-20	_ATGIPDRFSGSGSGTDFTLTISR[Methyl (KR)]	1
Methyl	A0A0C4DH36	Immunoglobulin heavy variable 3-38 (non-functional) (Fragment)	_AEGTAVYYC[Carbamidomethyl (C)]AR[Methyl (KR)]	2
Methyl	P01709	Immunoglobulin lambda variable 2-8	_LM[Oxidation (M)]IYEVSK[Methyl (KR)]	2
Methyl	A0A0C4DH33	Immunoglobulin heavy variable 1-24	_VTMTEDTSTDTAYMELSSLR[Methyl (KR)]	1
Methyl	P01742	Immunoglobulin heavy variable 1-69	_VTITADK[Methyl (KR)]STSTAYMELSSLR[Methyl (KR)]	2
Methyl	A0A075B6Q5	Immunoglobulin heavy variable 3-64	_DNSKNTLYLQM[Oxidation (M)]GSLR[dimethyl (KR)]	2
Methyl	P0DOY2	Immunoglobulin lambda constant 2	_QSNNK[Methyl (KR)]YAASSYLSLTPEQWK	1
Methyl	P01700	Immunoglobulin lambda variable 1-47	_SGTSASLAISGLR[Methyl (KR)]	1
Methyl	A0A087X0Q4	Immunoglobulin kappa variable 2-40	_ASGVPDR[dimethyl (KR)]FSGSGSGTDFTLK	1
Methyl	A0A075B6K0	Immunoglobulin lambda variable 3-16	_ITC[Carbamidomethyl (C)]SGEALPK[dimethyl (KR)]	2
Methyl	A0A0B4J2H0	Immunoglobulin heavy variable 1-69D	_SEDTAVYYC[Carbamidomethyl (C)]AR[dimethyl (KR)]	2
Methyl	P01704	Immunoglobulin lambda variable 2-14	_LMIYEVSNR[Methyl (KR)]PSGVSNR	1
Methyl	A0A0B4J2H0	Immunoglobulin heavy variable 1-69D	_SEDTAVYYC[Carbamidomethyl (C)]AR[Methyl (KR)]	2
Methyl	P01834	Immunoglobulin kappa constant	_VQWK[Methyl (KR)]VDNALQSGNSQESVTEQDSK	1
Methyl	A0A0B4J2D9;P0DP09	Immunoglobulin kappa variable 1D-13;Immunoglobulin kappa variable 1-13	_LLIYDASSLESGVPSR[dimethyl (KR)]	1
Methyl	P01624	Immunoglobulin kappa variable 3-15	_LLIYGASTR[Methyl (KR)]	1
Methyl	P01024	Complement C3	_YFK[Methyl (KR)]PGMPFDLM[Oxidation (M)]VFVTNPDGSPAYR[dimethyl (KR)]VPVAVQGEDTVQSLTQGDGVAK	3
Methyl	A0A0C4DH31	Immunoglobulin heavy variable 1-18	_SLRSDDTAVYYC[Carbamidomethyl (C)]AR[Methyl (KR)]	2
Methyl	P01742	Immunoglobulin heavy variable 1-69	_STSTAYMELSSLR[Methyl (KR)]	1
Methyl	A0A0C4DH43	Immunoglobulin heavy variable 2-70D	_VSWIR[Methyl (KR)]QPPGK	1
Methyl	A0A0C4DH35	Immunoglobulin heavy variable 3-35 (non-functional) (Fragment)	_GLEWVSGVSWNGSR[dimethyl (KR)]	1
Methyl	A0A0C4DH34	Immunoglobulin heavy variable 4-28	_SRVTMSVDTSK[Methyl (KR)]NQFSLK	1
Methyl	P01699	Immunoglobulin lambda variable 1-44	_LLIYSNNQR[dimethyl (KR)]PSGVPDR[Methyl (KR)]	2
Methyl	P01699	Immunoglobulin lambda variable 1-44	_LLIYSNNQR[Methyl (KR)]PSGVPDR[Methyl (KR)]	2
Methyl	P01699	Immunoglobulin lambda variable 1-44	_LLIYSNNQR[dimethyl (KR)]PSGVPDR[Methyl (KR)]FSGSK	2
Methyl	P01706	Immunoglobulin lambda variable 2-11	_LM[Oxidation (M)]IYDVSK[Methyl (KR)]RPSGVPDR	2
Methyl	P01717	Immunoglobulin lambda variable 3-25	_QYAYWYQQKPGQAPVLVIYK[Methyl (KR)]	1
Methyl	P01718	Immunoglobulin lambda variable 3-27	_ITC[Carbamidomethyl (C)]SGDVLAK[dimethyl (KR)]	2
Methyl	P02768	Serum albumin	_RMPC[Carbamidomethyl (C)]AEDYLSVVLNQLC[Carbamidomethyl (C)]VLHEK[dimethyl (KR)]	3
Methyl	P00738	Haptoglobin	_AVGDK[Methyl (KR)]LPEC[Carbamidomethyl (C)]EADDGC[Carbamidomethyl (C)]PKPPEIAHGYVEHSVR	3
Methyl	A0A0J9YX35	Immunoglobulin heavy variable 3-64D	_NTLYLQMSSLR[Methyl (KR)]	1
Methyl	A0A0C4DH35	Immunoglobulin heavy variable 3-35 (non-functional) (Fragment)	_GLEWVSGVSWNGSR[Methyl (KR)]	1
Methyl	P01834	Immunoglobulin kappa constant	_HK[Methyl (KR)]VYAC[Carbamidomethyl (C)]EVTHQGLSSPVTKSFNR	2
Methyl	P0DOY2	Immunoglobulin lambda constant 2	_AGVETTTPSK[dimethyl (KR)]QSNNKYAASSYLSLTPEQWK	1
Methyl	A0A0A0MS15	Immunoglobulin heavy variable 3-49	_QAPGK[dimethyl (KR)]GLEWVGFIR	1
Methyl	A0A024R6I7	Alpha-1-antitrypsin	_DTEEEDFHVDQATTVK[dimethyl (KR)]	1
Methyl	P02768	Serum albumin	_R[Methyl (KR)]HPDYSVVLLLR	1
Methyl	P01834	Immunoglobulin kappa constant	_HK[dimethyl (KR)]VYAC[Carbamidomethyl (C)]EVTHQGLSSPVTK	2
Methyl	A0A0G2JRQ6	Uncharacterized protein (Fragment)	_LLLYAASR[dimethyl (KR)]	1
Methyl	P01857	Immunoglobulin heavy constant gamma 1	_SR[Methyl (KR)]WQQGNVFSC[Carbamidomethyl (C)]SVM[Oxidation (M)]HEALHNHYTQK	3
Methyl	P00738	Haptoglobin	_YVMLPVADQDQC[Carbamidomethyl (C)]IR[Methyl (KR)]	2
Methyl	P01766	Immunoglobulin heavy variable 3-13	_AGDTAVYYC[Carbamidomethyl (C)]AR[Methyl (KR)]	2
Methyl	A0A0B4J1Y9	Immunoglobulin heavy variable 3-72	_FTISR[Methyl (KR)]DDSK	1
Methyl	A0A0B4J1V6	Immunoglobulin heavy variable 3-73	_LSC[Carbamidomethyl (C)]AASGFTFSGSAM[Oxidation (M)]HWVR[Methyl (KR)]	3
Methyl	P80748	Immunoglobulin lambda variable 3-21	_PGQAPVLVVYDDSDR[Methyl (KR)]PSGIPER	1
Methyl	P02768	Serum albumin	_SHC[Carbamidomethyl (C)]IAEVENDEM[Oxidation (M)]PADLPSLAADFVESK[dimethyl (KR)]	3
Methyl	A0A075B7D0	Immunoglobulin heavy variable 1/OR15-1 (non-functional) (Fragment)	_QAPGQELGWMGR[Methyl (KR)]	1
Methyl	A0A0C4DH38	Immunoglobulin heavy variable 5-51	_GLEWMGIIYPGDSDTR[Methyl (KR)]	1
Methyl	P01703	Immunoglobulin lambda variable 1-40	_LLIYGNSNR[dimethyl (KR)]PSGVPDR[dimethyl (KR)]	2
Methyl	A0A0B4J2H0	Immunoglobulin heavy variable 1-69D	_ASGGTFSSYAISWVR[Methyl (KR)]	1
Methyl	A0A075B6K4	Immunoglobulin lambda variable 3-10	_K[dimethyl (KR)]YAYWYQQK	1
Methyl	P08603	Complement factor H	_SLGNVIMVC[Carbamidomethyl (C)]R[Methyl (KR)]	2
Methyl	A0A0C4DH38	Immunoglobulin heavy variable 5-51	_ASDTAM[Oxidation (M)]YYC[Carbamidomethyl (C)]AR[Methyl (KR)]	3
Methyl	P02768	Serum albumin	_FQNALLVR[Methyl (KR)]	1
Methyl	A0A0G2JMB2	Immunoglobulin heavy constant alpha 2 (Fragment)	_K[Methyl (KR)]GDTFSC[Carbamidomethyl (C)]MVGHEALPLAFTQK	2
Methyl	P01742	Immunoglobulin heavy variable 1-69	_VTITADK[Methyl (KR)]STSTAYMELSSLR	1
Methyl	A0A0C4DH34	Immunoglobulin heavy variable 4-28	_VTMSVDTSK[Methyl (KR)]NQFSLK	1
Methyl	P06312	Immunoglobulin kappa variable 4-1	_ESGVPDR[Methyl (KR)]	1
Methyl	A0A0B4J1Y8	Immunoglobulin lambda variable 9-49	_GDGIPDR[Methyl (KR)]FSVLGSGLNR	1
Methyl	A0A087X0Q4	Immunoglobulin kappa variable 2-40	_ASGVPDR[Methyl (KR)]FSGSGSGTDFTLK	1
Methyl	P04433	Immunoglobulin kappa variable 3-11	_ASQSVSSYLAWYQQK[Methyl (KR)]PGQAPR	1
Methyl	P01871	Immunoglobulin heavy constant mu	_GGKYAATSQVLLPSK[Methyl (KR)]DVMQGTDEHVVC[Carbamidomethyl (C)]K	2
Methyl	P01024	Complement C3	_I[Acetyl (Protein N-term)]THR[dimethyl (KR)]IHWESASLLR	2
Methyl	A0A0J9YVT0;P0DP02	Immunoglobulin heavy variable 3-33 (Fragment);Immunoglobulin heavy variable 3-30-3	_AEDTAVYYC[Carbamidomethyl (C)]AR[Methyl (KR)]	2
Methyl	A0A0B4J1Y9	Immunoglobulin heavy variable 3-72	_GLEWVGR[Methyl (KR)]	1
Methyl	P01834	Immunoglobulin kappa constant	_TVAAPSVFIFPPSDEQLK[dimethyl (KR)]SGTASVVC[Carbamidomethyl (C)]LLNNFYPR	2
Methyl	P04433	Immunoglobulin kappa variable 3-11	_LLIYDASNR[dimethyl (KR)]	1
Methyl	P01624	Immunoglobulin kappa variable 3-15	_LLIYGASTR[dimethyl (KR)]	1
Methyl	P01619	Immunoglobulin kappa variable 3-20	_LLIYGASSR[Methyl (KR)]	1
Methyl	P01619	Immunoglobulin kappa variable 3-20	_LLIYGASSR[dimethyl (KR)]	1
Methyl	A0A0C4DH25	Immunoglobulin kappa variable 3D-20	_LLIYDASSR[Methyl (KR)]	1
Methyl	A0A075B6K5	Immunoglobulin lambda variable 3-9	_FSGSNSGNTATLTISR[Methyl (KR)]	1
Oxidation	P02675	Fibrinogen beta chain	_KGGETSEM[Oxidation (M)]YLIQPDSSVKPYR	1
Oxidation	P02675	Fibrinogen beta chain	_GGETSEM[Oxidation (M)]YLIQPDSSVKPYR	1
Oxidation	P02675	Fibrinogen beta chain	_VYC[Carbamidomethyl (C)]DM[Oxidation (M)]NTENGGWTVIQNR	2
Oxidation	P69905	Hemoglobin subunit alpha	_KVADALTNAVAHVDDM[Oxidation (M)]PNALSALSDLHAHK	1
Oxidation	P04114	Apolipoprotein B-100	_LLLQM[Oxidation (M)]DSSATAYGSTVSK	1
Oxidation	P02679;P02679-2	Fibrinogen gamma chain;Isoform Gamma-A of Fibrinogen gamma chain	_TSTADYAM[Oxidation (M)]FK	1
Oxidation	A0A096LPE2	SAA2-SAA4 readthrough	_AYWDIM[Oxidation (M)]ISNHQNSNR	1
Oxidation	P02671	Fibrinogen alpha chain	_ALTDM[Oxidation (M)]PQMR	1
Oxidation	P02671	Fibrinogen alpha chain	_TVIGPDGHKEVTKEVVTSEDGSDC[Carbamidomethyl (C)]PEAM[Oxidation (M)]DLGTLSGIGTLDGFR	2
Oxidation	P02671	Fibrinogen alpha chain	_EVTKEVVTSEDGSDC[Carbamidomethyl (C)]PEAM[Oxidation (M)]DLGTLSGIGTLDGFR	2
Oxidation	P02675	Fibrinogen beta chain	_YYWGGQYTWDM[Oxidation (M)]AK	1
Oxidation	P01024	Complement C3	_TVM[Oxidation (M)]VNIENPEGIPVKQDSLSSQNQLGVLPLSWDIPELVNMGQWK	1
Oxidation	P02768	Serum albumin	_DVC[Carbamidomethyl (C)]KNYAEAKDVFLGM[Oxidation (M)]FLYEYAR	2
Oxidation	P02671	Fibrinogen alpha chain	_M[Oxidation (M)]KPVPDLVPGNFK	1
Oxidation	P02675	Fibrinogen beta chain	_M[Oxidation (M)]GPTELLIEMEDWKGDKVK	1
Oxidation	P02675	Fibrinogen beta chain	_MGPTELLIEM[Oxidation (M)]EDWKGDKVK	1
Oxidation	P04114	Apolipoprotein B-100	_LSNDM[Oxidation (M)]MGSYAEM[Oxidation (M)]K	2
Oxidation	P02787	Serotransferrin	_SM[Oxidation (M)]GGKEDLIWELLNQAQEHFGK	1
Oxidation	P01024	Complement C3	_TVM[Oxidation (M)]VNIENPEGIPVK	1
Oxidation	P01024	Complement C3	_TVMVNIENPEGIPVKQDSLSSQNQLGVLPLSWDIPELVNM[Oxidation (M)]GQWK	1
Oxidation	P02671	Fibrinogen alpha chain	_ALTDMPQM[Oxidation (M)]R	1
Oxidation	P02671	Fibrinogen alpha chain	_M[Oxidation (M)]ELERPGGNEITR	1
Oxidation	P02675	Fibrinogen beta chain	_HGTDDGVVWM[Oxidation (M)]NWK	1
Oxidation	P00734	Prothrombin	_IVEGSDAEIGM[Oxidation (M)]SPWQVMLFRK	1
Oxidation	P0C0L5	Complement C4-B	_AEM[Oxidation (M)]ADQAAAWLTR	1
Oxidation	P01857	Immunoglobulin heavy constant gamma 1	_LTVDKSRWQQGNVFSC[Carbamidomethyl (C)]SVM[Oxidation (M)]HEALHNHYTQK	2
Oxidation	P02647	Apolipoprotein A-I	_KWQEEM[Oxidation (M)]ELYR	1
Oxidation	P02790	Hemopexin	_DVRDYFM[Oxidation (M)]PC[Carbamidomethyl (C)]PGRGHGHR	2
Oxidation	P02671	Fibrinogen alpha chain	_SYKM[Oxidation (M)]ADEAGSEADHEGTHSTKR	1
Oxidation	P02675	Fibrinogen beta chain	_GSWYSM[Oxidation (M)]R	1
Oxidation	P02675	Fibrinogen beta chain	_GSWYSM[Oxidation (M)]RK	1
Oxidation	P00738	Haptoglobin	_TPKSPVGVQPILNEHTFC[Carbamidomethyl (C)]AGM[Oxidation (M)]SK	2
Oxidation	P0C0L5	Complement C4-B	_GRTLEIPGNSDPNM[Oxidation (M)]IPDGDFNSYVR	1
Oxidation	P00450	Ceruloplasmin	_RDTANLFPQTSLTLHM[Oxidation (M)]WPDTEGTFNVEC[Carbamidomethyl (C)]LTTDHYTGGMK	2
Oxidation	P02747	Complement C1q subcomponent subunit C	_NGPM[Oxidation (M)]GPPGM[Oxidation (M)]PGVPGPM[Oxidation (M)]GIPGEPGEEGR	3
Oxidation	P04114	Apolipoprotein B-100	_GM[Oxidation (M)]TRPLSTLISSSQSC[Carbamidomethyl (C)]QYTLDAK	2
Oxidation	Q9BXR6	Complement factor H-related protein 5	_AM[Oxidation (M)]ISSPPFR	1
Oxidation	P02675	Fibrinogen beta chain	_M[Oxidation (M)]GPTELLIEMEDWKGDK	1
Oxidation	P01024	Complement C3	_GQGTLSVVTM[Oxidation (M)]YHAK	1
Oxidation	P10643	Complement component C7	_IAC[Carbamidomethyl (C)]VLPVLM[Oxidation (M)]DGIQSHPQKPFYTVGEK	2
Oxidation	P04114	Apolipoprotein B-100	_YKNFATSNKM[Oxidation (M)]DMTFSK	1
Oxidation	P09871	Complement C1s subcomponent	_GM[Oxidation (M)]DSC[Carbamidomethyl (C)]KGDSGGAFAVQDPNDKTK	2
Oxidation	Q14624	Inter-alpha-trypsin inhibitor heavy chain H4	_ANTVQEATFQM[Oxidation (M)]ELPK	1
Oxidation	P04114	Apolipoprotein B-100	_TLQGIPQM[Oxidation (M)]IGEVIR	1
Oxidation	P00450	Ceruloplasmin	_MYSVNGYTFGSLPGLSM[Oxidation (M)]C[Carbamidomethyl (C)]AEDR	2
Oxidation	P00450	Ceruloplasmin	_M[Oxidation (M)]YYSAVDPTKDIFTGLIGPM[Oxidation (M)]K	2
Oxidation	P04114	Apolipoprotein B-100	_LLLQM[Oxidation (M)]DSSATAYGSTVSKR	1
Oxidation	P0C0L5	Complement C4-B	_ITPGKPYILTVPGHLDEM[Oxidation (M)]QLDIQAR	1
Oxidation	P04114	Apolipoprotein B-100	_VPLLLSEPINIIDALEM[Oxidation (M)]R	1
Oxidation	A0A0J9YVT0;P0DP02	Immunoglobulin heavy variable 3-33 (Fragment);Immunoglobulin heavy variable 3-30-3	_DNSKNTLYLQM[Oxidation (M)]NSLR	1
Oxidation	P04114	Apolipoprotein B-100	_LAAYLM[Oxidation (M)]LMR	1
Oxidation	P01009	Alpha-1-antitrypsin	_LGM[Oxidation (M)]FNIQHC[Carbamidomethyl (C)]K	2
Oxidation	P0C0L5	Complement C4-B	_LVNGQSHISLSKAEFQDALEKLNM[Oxidation (M)]GITDLQGLR	1
Oxidation	P04217	Alpha-1B-glycoprotein	_TDGEGALSEPSATVTIEELAAPPPPVLM[Oxidation (M)]HHGESSQVLHPGNK	1
Oxidation	P02652;V9GYM3	Apolipoprotein A-II	_EPC[Carbamidomethyl (C)]VESLVSQYFQTVTDYGKDLM[Oxidation (M)]EK	2
Oxidation	P01024	Complement C3	_LM[Oxidation (M)]NIFLKDSITTWEILAVSMSDKK	1
Oxidation	P06727	Apolipoprotein A-IV	_TLSLPELEQQQEQQQEQQQEQVQM[Oxidation (M)]LAPLES	1
Oxidation	A0A024R0T9;K7ER74;P02655	Apolipoprotein C-II isoform 1;APOC4-APOC2 readthrough (NMD candidate);Apolipoprotein C-II	_STAAM[Oxidation (M)]STYTGIFTDQVLSVLKGEE	1
Oxidation	P01011	Alpha-1-antichymotrypsin	_TIVRFNRPFLMIIVPTDTQNIFFM[Oxidation (M)]SK	1
Oxidation	E9PFZ2	Ceruloplasmin	_M[Oxidation (M)]YYSAVEPTK	1
Oxidation	P0C0L5	Complement C4-B	_AVGSGATFSHYYYM[Oxidation (M)]ILSR	1
Oxidation	P08603	Complement factor H	_TDC[Carbamidomethyl (C)]LSLPSFENAIPM[Oxidation (M)]GEKKDVYK	2
Oxidation	A0A182DWH7;P49908	Selenoprotein P (Fragment);Selenoprotein P	_DM[Oxidation (M)]PASEDLQDLQKK	1
Oxidation	P02671	Fibrinogen alpha chain	_ALTDM[Oxidation (M)]PQM[Oxidation (M)]R	2
Oxidation	P00747	Plasminogen	_TPENYPNAGLTM[Oxidation (M)]NYC[Carbamidomethyl (C)]RNPDADKGPWC[Carbamidomethyl (C)]FTTDPSVR	3
Oxidation	P04114	Apolipoprotein B-100	_SKPTVSSSM[Oxidation (M)]EFK	1
Oxidation	A0A0C4DH36	Immunoglobulin heavy variable 3-38 (non-functional) (Fragment)	_NTLYLQM[Oxidation (M)]NNLR	1
Oxidation	Q06033;Q06033-2	Inter-alpha-trypsin inhibitor heavy chain H3;Isoform 2 of Inter-alpha-trypsin inhibitor heavy chain H3	_GISM[Oxidation (M)]LNK	1
Oxidation	P02671	Fibrinogen alpha chain	_TFPGFFSPM[Oxidation (M)]LGEFVSETESR	1
Oxidation	P00450	Ceruloplasmin	_M[Oxidation (M)]YSVNGYTFGSLPGLSMC[Carbamidomethyl (C)]AEDR	2
Oxidation	P01023	Alpha-2-macroglobulin	_LLLQQVSLPELPGEYSM[Oxidation (M)]K	1
Oxidation	P0C0L5	Complement C4-B	_M[Oxidation (M)]KFAC[Carbamidomethyl (C)]YYPR	2
Oxidation	P10643	Complement component C7	_EQTM[Oxidation (M)]SEC[Carbamidomethyl (C)]EAGALR	2
Oxidation	P02671	Fibrinogen alpha chain	_AQLVDM[Oxidation (M)]K	1
Oxidation	P02671	Fibrinogen alpha chain	_AQLVDM[Oxidation (M)]KR	1
Oxidation	P01871	Immunoglobulin heavy constant mu	_TVDKSTGKPTLYNVSLVM[Oxidation (M)]SDTAGTC[Carbamidomethyl (C)]Y	2
Oxidation	P02647	Apolipoprotein A-I	_WQEEM[Oxidation (M)]ELYR	1
Oxidation	P01782	Immunoglobulin heavy variable 3-9	_NSLYLQM[Oxidation (M)]NSLR	1
Oxidation	P02647	Apolipoprotein A-I	_LSPLGEEM[Oxidation (M)]R	1
Oxidation	P05160	Coagulation factor XIII B chain	_GM[Oxidation (M)]C[Carbamidomethyl (C)]TSPPLIK	2
Oxidation	P01024	Complement C3	_C[Carbamidomethyl (C)]C[Carbamidomethyl (C)]EDGMRENPM[Oxidation (M)]R	3
Oxidation	P04196	Histidine-rich glycoprotein	_FKSGFPQVSM[Oxidation (M)]FFTHTFPK	1
Oxidation	P00450	Ceruloplasmin	_M[Oxidation (M)]HAINGR	1
Oxidation	P13671	Complement component C6	_KYNPIPSVQLM[Oxidation (M)]GNGFHFLAGEPR	1
Oxidation	A0A286YEY5;P01877	Immunoglobulin heavy constant alpha 2 (Fragment);Immunoglobulin heavy constant alpha 2	_KGETFSC[Carbamidomethyl (C)]M[Oxidation (M)]VGHEALPLAFTQK	2
Oxidation	Q06033;Q06033-2	Inter-alpha-trypsin inhibitor heavy chain H3;Isoform 2 of Inter-alpha-trypsin inhibitor heavy chain H3	_STSIVIM[Oxidation (M)]LTDGDANVGESRPEK	1
Oxidation	P08185	Corticosteroid-binding globulin	_M[Oxidation (M)]NTVIAALSR	1
Oxidation	P01861	Immunoglobulin heavy constant gamma 4	_AKGQPREPQVYTLPPSQEEM[Oxidation (M)]TK	1
Oxidation	P0C0L5	Complement C4-B	_VGLSGM[Oxidation (M)]AIADVTLLSGFHALR	1
Oxidation	P02768	Serum albumin	_ATKEQLKAVM[Oxidation (M)]DDFAAFVEK	1
Oxidation	E9PFZ2	Ceruloplasmin	_MYYSAVEPTKDIFTGLIGPM[Oxidation (M)]K	1
Oxidation	P23142	Fibulin-1	_M[Oxidation (M)]C[Carbamidomethyl (C)]VDVNEC[Carbamidomethyl (C)]QRYPGR	3
Oxidation	P01859	Immunoglobulin heavy constant gamma 2	_TTPPM[Oxidation (M)]LDSDGSFFLYSKLTVDKSR	1
Oxidation	P00734	Prothrombin	_ENLDRDIALM[Oxidation (M)]K	1
Oxidation	Q08380	Galectin-3-binding protein	_AAFGQGSGPIM[Oxidation (M)]LDEVQC[Carbamidomethyl (C)]TGTEASLADC[Carbamidomethyl (C)]K	3
Oxidation	P00747	Plasminogen	_FGM[Oxidation (M)]HFC[Carbamidomethyl (C)]GGTLISPEWVLTAAHC[Carbamidomethyl (C)]LEK	3
Oxidation	P02748	Complement component C9	_TAGYGINILGM[Oxidation (M)]DPLSTPFDNEFYNGLC[Carbamidomethyl (C)]NR	2
Oxidation	P01024	Complement C3	_LM[Oxidation (M)]NIFLK	1
Oxidation	P01860	Immunoglobulin heavy constant gamma 3	_WQQGNIFSC[Carbamidomethyl (C)]SVM[Oxidation (M)]HEALHNR	2
Oxidation	P01008	Antithrombin-III	_DIPM[Oxidation (M)]NPMC[Carbamidomethyl (C)]IYR	2
Oxidation	A0A0C4DH38	Immunoglobulin heavy variable 5-51	_ASDTAM[Oxidation (M)]YYC[Carbamidomethyl (C)]AR	2
Oxidation	P02649	Apolipoprotein E	_ALMDETM[Oxidation (M)]K	1
Oxidation	P02671	Fibrinogen alpha chain	_DSHSLTTNIM[Oxidation (M)]EILR	1
Oxidation	P02790	Hemopexin	_DYFM[Oxidation (M)]PC[Carbamidomethyl (C)]PGR	2
Oxidation	P08603	Complement factor H	_QM[Oxidation (M)]SKYPSGER	1
Oxidation	P01024	Complement C3	_YRGDQDATMSILDISM[Oxidation (M)]M[Oxidation (M)]TGFAPDTDDLK	2
Oxidation	P05155;P05155-3	Plasma protease C1 inhibitor;Isoform 3 of Plasma protease C1 inhibitor	_M[Oxidation (M)]EPFHFKNSVIKVPMMNSK	1
Oxidation	A0A096LPE2	SAA2-SAA4 readthrough	_EALQGVGDM[Oxidation (M)]GR	1
Oxidation	P04114	Apolipoprotein B-100	_AVSM[Oxidation (M)]PSFSILGSDVRVPSYTLILPSLELPVLHVPR	1
Oxidation	P01024	Complement C3	_KHYLM[Oxidation (M)]WGLSSDFWGEKPNLSYIIGK	1
Oxidation	P05109	Protein S100-A8	_M[Oxidation (M)]LTELEKALNSIIDVYHKYSLIK	1
Oxidation	P04114	Apolipoprotein B-100	_KM[Oxidation (M)]TSNFPVDLSDYPK	1
Oxidation	P01009	Alpha-1-antitrypsin	_KLSSWVLLM[Oxidation (M)]K	1
Oxidation	P01024	Complement C3	_HYLM[Oxidation (M)]WGLSSDFWGEKPNLSYIIGK	1
Oxidation	P00450	Ceruloplasmin	_NM[Oxidation (M)]ATRPYSIHAHGVQTESSTVTPTLPGETLTYVWK	1
Oxidation	P04114	Apolipoprotein B-100	_VLVDHFGYTKDDKHEQDM[Oxidation (M)]VNGIMLSVEK	1
Oxidation	P02790	Hemopexin	_EWFWDLATGTM[Oxidation (M)]K	1
Oxidation	P01008	Antithrombin-III	_FATTFYQHLADSKNDNDNIFLSPLSISTAFAM[Oxidation (M)]TK	1
Oxidation	P69905	Hemoglobin subunit alpha	_KVADALTNAVAHVDDM[Oxidation (M)]PNALSALSDLHAHKLR	1
Oxidation	P04275	von Willebrand factor	_IEDLPTM[Oxidation (M)]VTLGNSFLHK	1
Oxidation	P68871	Hemoglobin subunit beta	_FFESFGDLSTPDAVM[Oxidation (M)]GNPK	1
Oxidation	P01024	Complement C3	_YFKPGM[Oxidation (M)]PFDLM[Oxidation (M)]VFVTNPDGSPAYRVPVAVQGEDTVQSLTQGDGVAK	2
Oxidation	P04003	C4b-binding protein alpha chain	_LM[Oxidation (M)]QC[Carbamidomethyl (C)]LPNPEDVK	2
Oxidation	P08697	Alpha-2-antiplasmin	_HQM[Oxidation (M)]DLVATLSQLGLQELFQAPDLR	1
Oxidation	P01023	Alpha-2-macroglobulin	_FRVVSM[Oxidation (M)]DENFHPLNELIPLVYIQDPK	1
Oxidation	P01031	Complement C5	_LKEGM[Oxidation (M)]LSIMSYR	1
Oxidation	P05546	Heparin cofactor 2	_HQGTITVNEEGTQATTVTTVGFM[Oxidation (M)]PLSTQVR	1
Oxidation	P00450	Ceruloplasmin	_MYSVNGYTFGSLPGLSM[Oxidation (M)]C[Carbamidomethyl (C)]AEDRVK	2
Oxidation	P08603	Complement factor H	_IEGDEEM[Oxidation (M)]HC[Carbamidomethyl (C)]SDDGFWSK	2
Oxidation	A0A0B4J1X8	Immunoglobulin heavy variable 3-43	_DNSKNSLYLQM[Oxidation (M)]NSLR	1
Oxidation	P01861	Immunoglobulin heavy constant gamma 4	_GQPREPQVYTLPPSQEEM[Oxidation (M)]TK	1
Oxidation	A0A087X0Q4	Immunoglobulin kappa variable 2-40	_EDIVM[Oxidation (M)]TQTPLSLPVTPGEPASISC[Carbamidomethyl (C)]R	2
Oxidation	P69905	Hemoglobin subunit alpha	_VADALTNAVAHVDDM[Oxidation (M)]PNALSALSDLHAHKLR	1
Oxidation	P0C0L5	Complement C4-B	_EM[Oxidation (M)]SGSPASGIPVK	1
Oxidation	P08697	Alpha-2-antiplasmin	_DSFHLDEQFTVPVEMM[Oxidation (M)]QAR	1
Oxidation	P61769	Beta-2-microglobulin	_IVKWDRDM[Oxidation (M)]	1
Oxidation	P08603	Complement factor H	_EIM[Oxidation (M)]ENYNIALR	1
Oxidation	P00739	Haptoglobin-related protein	_VM[Oxidation (M)]PIC[Carbamidomethyl (C)]LPSKNYAEVGR	2
Oxidation	P04004	Vitronectin	_IYISGM[Oxidation (M)]APRPSLAKK	1
Oxidation	P02042	Hemoglobin subunit delta	_FFESFGDLSSPDAVM[Oxidation (M)]GNPK	1
Oxidation	P00747	Plasminogen	_FVTWIEGVM[Oxidation (M)]R	1
Oxidation	P04114	Apolipoprotein B-100	_YGM[Oxidation (M)]VAQVTQTLK	1
Oxidation	P0C0L5	Complement C4-B	_SM[Oxidation (M)]QGGLVGNDETVALTAFVTIALHHGLAVFQDEGAEPLKQR	1
Oxidation	P01023	Alpha-2-macroglobulin	_SFVHLEPM[Oxidation (M)]SHELPC[Carbamidomethyl (C)]GHTQTVQAHYILNGGTLLGLK	2
Oxidation	P0C0L5	Complement C4-B	_GQIVFM[Oxidation (M)]NR	1
Oxidation	A0A0C4DH34	Immunoglobulin heavy variable 4-28	_VTM[Oxidation (M)]SVDTSK	1
Oxidation	P01008	Antithrombin-III	_FRIEDGFSLKEQLQDM[Oxidation (M)]GLVDLFSPEK	1
Oxidation	P0C0L5	Complement C4-B	_AVGSGATFSHYYYM[Oxidation (M)]ILSRGQIVFMNREPK	1
Oxidation	P00747	Plasminogen	_M[Oxidation (M)]RDVVLFEK	1
Oxidation	P0C0L5	Complement C4-B	_LEPGKEYLIM[Oxidation (M)]GLDGATYDLEGHPQYLLDSNSWIEEMPSER	1
Oxidation	P19827	Inter-alpha-trypsin inhibitor heavy chain H1	_GHM[Oxidation (M)]LENHVERLWAYLTIQELLAKR	1
Oxidation	P01009	Alpha-1-antitrypsin	_FNKPFVFLM[Oxidation (M)]IEQNTKSPLFMGK	1
Oxidation	A0A075B7E8	Immunoglobulin heavy variable 3/OR16-13 (non-functional) (Fragment)	_AEDM[Oxidation (M)]AVYYC[Carbamidomethyl (C)]TR	2
Oxidation	P01024	Complement C3	_HLIVTPSGC[Carbamidomethyl (C)]GEQNMIGM[Oxidation (M)]TPTVIAVHYLDETEQWEKFGLEKR	2
Oxidation	P0DJI8	Serum amyloid A-1 protein	_AYSDM[Oxidation (M)]REANYIGSDKYFHAR	1
Oxidation	P07360	Complement component C8 gamma chain	_AEATTLHVAPQGTAM[Oxidation (M)]AVSTFR	1
Oxidation	P01008	Antithrombin-III	_ANRPFLVFIREVPLNTIIFM[Oxidation (M)]GR	1
Oxidation	P02768	Serum albumin	_LVRPEVDVM[Oxidation (M)]C[Carbamidomethyl (C)]TAFHDNEETFLK	2
Oxidation	P10909;P10909-2;P10909-4;P10909-5	Clusterin;Isoform 2 of Clusterin;Isoform 4 of Clusterin;Isoform 5 of Clusterin	_FM[Oxidation (M)]ETVAEK	1
Oxidation	P01009	Alpha-1-antitrypsin	_LGM[Oxidation (M)]FNIQHC[Carbamidomethyl (C)]KK	2
Oxidation	P0C0L5	Complement C4-B	_AEFQDALEKLNM[Oxidation (M)]GITDLQGLR	1
Oxidation	P01024	Complement C3	_AGDFLEANYM[Oxidation (M)]NLQR	1
Oxidation	A0A0G2JMB2	Immunoglobulin heavy constant alpha 2 (Fragment)	_GDTFSC[Carbamidomethyl (C)]M[Oxidation (M)]VGHEALPLAFTQK	2
Oxidation	A0A0J9YVT0;P0DP02	Immunoglobulin heavy variable 3-33 (Fragment);Immunoglobulin heavy variable 3-30-3	_NTLYLQM[Oxidation (M)]NSLR	1
Oxidation	P02787	Serotransferrin	_TAGWNIPM[Oxidation (M)]GLLYNK	1
Oxidation	P01024	Complement C3	_YFKPGM[Oxidation (M)]PFDLMVFVTNPDGSPAYRVPVAVQGEDTVQSLTQGDGVAK	1
Oxidation	P0C0L5	Complement C4-B	_EVYM[Oxidation (M)]PSSIFQDDFVIPDISEPGTWK	1
Oxidation	P04114	Apolipoprotein B-100	_LSNDMM[Oxidation (M)]GSYAEMK	1
Oxidation	P00734	Prothrombin	_IVEGSDAEIGMSPWQVM[Oxidation (M)]LFR	1
Oxidation	A0A0A0MS09;P01880;P01880-2	Immunoglobulin heavy constant delta (Fragment);Immunoglobulin heavy constant delta;Isoform 2 of Immunoglobulin heavy constant delta	_DSYYM[Oxidation (M)]TSSQLSTPLQQWR	1
Oxidation	P04114	Apolipoprotein B-100	_AVSM[Oxidation (M)]PSFSILGSDVR	1
Oxidation	P01024	Complement C3	_HLIVTPSGC[Carbamidomethyl (C)]GEQNMIGM[Oxidation (M)]TPTVIAVHYLDETEQWEK	2
Oxidation	P08697	Alpha-2-antiplasmin	_LVPPM[Oxidation (M)]EEDYPQFGSPK	1
Oxidation	P02768	Serum albumin	_ETYGEM[Oxidation (M)]ADC[Carbamidomethyl (C)]C[Carbamidomethyl (C)]AK	3
Oxidation	P01008	Antithrombin-III	_VEKELTPEVLQEWLDELEEMMLVVHM[Oxidation (M)]PR	1
Oxidation	P01008	Antithrombin-III	_DIPM[Oxidation (M)]NPM[Oxidation (M)]C[Carbamidomethyl (C)]IYR	3
Oxidation	P04114	Apolipoprotein B-100	_GISTSAASPAVGTVGM[Oxidation (M)]DMDEDDDFSKWNFYYSPQSSPDKK	1
Oxidation	P04114	Apolipoprotein B-100	_AALTELSLGSAYQAM[Oxidation (M)]ILGVDSK	1
Oxidation	P04114	Apolipoprotein B-100	_DLKM[Oxidation (M)]LETVR	1
Oxidation	P01024	Complement C3	_C[Carbamidomethyl (C)]C[Carbamidomethyl (C)]EDGM[Oxidation (M)]R	3
Oxidation	A0A0B4J1Y9	Immunoglobulin heavy variable 3-72	_LSC[Carbamidomethyl (C)]AASGFTFSDHYM[Oxidation (M)]DWVR	2
Oxidation	A0A0J9YXX1	Immunoglobulin heavy variable 5-10-1	_GLEWM[Oxidation (M)]GR	1
Oxidation	P05155;P05155-3	Plasma protease C1 inhibitor;Isoform 3 of Plasma protease C1 inhibitor	_LYHAFSAM[Oxidation (M)]K	1
Oxidation	A0A0C4DH31	Immunoglobulin heavy variable 1-18	_VTMTTDTSTSTAYM[Oxidation (M)]ELR	1
Oxidation	P00450	Ceruloplasmin	_ADDKVYPGEQYTYM[Oxidation (M)]LLATEEQSPGEGDGNC[Carbamidomethyl (C)]VTR	2
Oxidation	P01024	Complement C3	_YFKPGMPFDLM[Oxidation (M)]VFVTNPDGSPAYRVPVAVQGEDTVQSLTQGDGVAK	1
Oxidation	P01024	Complement C3	_YYGGGYGSTQATFM[Oxidation (M)]VFQALAQYQK	1
Oxidation	P01009	Alpha-1-antitrypsin	_RLGM[Oxidation (M)]FNIQHC[Carbamidomethyl (C)]KK	2
Oxidation	P01024	Complement C3	_HLIVTPSGC[Carbamidomethyl (C)]GEQNM[Oxidation (M)]IGM[Oxidation (M)]TPTVIAVHYLDETEQWEK	3
Oxidation	P06396	Gelsolin	_VPFDAATLHTSTAM[Oxidation (M)]AAQHGMDDDGTGQK	1
Oxidation	P09871	Complement C1s subcomponent	_LKDPVKM[Oxidation (M)]GPTVSPIC[Carbamidomethyl (C)]LPGTSSDYNLMDGDLGLISGWGR	2
Oxidation	P0C0L5	Complement C4-B	_C[Carbamidomethyl (C)]C[Carbamidomethyl (C)]QDGVTRLPM[Oxidation (M)]MR	3
Oxidation	P02679;P02679-2	Fibrinogen gamma chain;Isoform Gamma-A of Fibrinogen gamma chain	_KMLEEIM[Oxidation (M)]KYEASILTHDSSIR	1
Oxidation	P02790	Hemopexin	_DYFM[Oxidation (M)]PC[Carbamidomethyl (C)]PGRGHGHR	2
Oxidation	P06702	Protein S100-A9	_M[Oxidation (M)]HEGDEGPGHHHKPGLGEGTP	1
Oxidation	P00734	Prothrombin	_RQEC[Carbamidomethyl (C)]SIPVC[Carbamidomethyl (C)]GQDQVTVAM[Oxidation (M)]TPR	3
Oxidation	P04114	Apolipoprotein B-100	_GM[Oxidation (M)]ALFGEGK	1
Oxidation	P05546	Heparin cofactor 2	_VSM[Oxidation (M)]MQTK	1
Oxidation	P01871	Immunoglobulin heavy constant mu	_ESATITC[Carbamidomethyl (C)]LVTGFSPADVFVQWM[Oxidation (M)]QR	2
Oxidation	P01709	Immunoglobulin lambda variable 2-8	_LM[Oxidation (M)]IYEVSK	1
Oxidation	P04114	Apolipoprotein B-100	_NSEEFAAAM[Oxidation (M)]SR	1
Oxidation	P02671	Fibrinogen alpha chain	_EVVTSEDGSDC[Carbamidomethyl (C)]PEAM[Oxidation (M)]DLGTLSGIGTLDGFR	2
Oxidation	P00734	Prothrombin	_YNWRENLDRDIALM[Oxidation (M)]K	1
Oxidation	P01024	Complement C3	_IRYYTYLIM[Oxidation (M)]NK	1
Oxidation	P00734	Prothrombin	_ITDNM[Oxidation (M)]FC[Carbamidomethyl (C)]AGYKPDEGKR	2
Oxidation	P00450	Ceruloplasmin	_WYLFGM[Oxidation (M)]GNEVDVHAAFFHGQALTNK	1
Oxidation	P01871	Immunoglobulin heavy constant mu	_GQPLSPEKYVTSAPM[Oxidation (M)]PEPQAPGR	1
Oxidation	P19827	Inter-alpha-trypsin inhibitor heavy chain H1	_ADVQAHGEGQEFSITC[Carbamidomethyl (C)]LVDEEEM[Oxidation (M)]KK	2
Oxidation	P05155;P05155-3	Plasma protease C1 inhibitor;Isoform 3 of Plasma protease C1 inhibitor	_VTTSQDM[Oxidation (M)]LSIMEK	1
Oxidation	P0C0L5	Complement C4-B	_LNM[Oxidation (M)]GITDLQGLR	1
Oxidation	P04114	Apolipoprotein B-100	_QSM[Oxidation (M)]TLSSEVQIPDFDVDLGTILR	1
Oxidation	P02649	Apolipoprotein E	_M[Oxidation (M)]EEMGSR	1
Oxidation	P02768	Serum albumin	_M[Oxidation (M)]PC[Carbamidomethyl (C)]AEDYLSVVLNQLC[Carbamidomethyl (C)]VLHEKTPVSDRVTK	3
Oxidation	B4E1Z4	cDNA FLJ55673, highly similar to Complement factor B (EC 3.4.21.47)	_ALHQVFEHM[Oxidation (M)]LDVSK	1
Oxidation	P02787	Serotransferrin	_M[Oxidation (M)]YLGYEYVTAIRNLR	1
Oxidation	P02787	Serotransferrin	_TAGWNIPM[Oxidation (M)]GLLYNKINHC[Carbamidomethyl (C)]RFDEFFSEGC[Carbamidomethyl (C)]APGSK	3
Oxidation	P08697	Alpha-2-antiplasmin	_DSFHLDEQFTVPVEM[Oxidation (M)]MQAR	1
Oxidation	P05155;P05155-3	Plasma protease C1 inhibitor;Isoform 3 of Plasma protease C1 inhibitor	_VETNM[Oxidation (M)]AFSPFSIASLLTQVLLGAGENTK	1
Oxidation	P01857	Immunoglobulin heavy constant gamma 1	_DTLM[Oxidation (M)]ISRTPEVTC[Carbamidomethyl (C)]VVVDVSHEDPEVK	2
Oxidation	P01023	Alpha-2-macroglobulin	_RTTVM[Oxidation (M)]VK	1
Oxidation	P04114	Apolipoprotein B-100	_NKYGM[Oxidation (M)]VAQVTQTLKLEDTPK	1
Oxidation	P05543	Thyroxine-binding globulin	_EGQMESVEAAM[Oxidation (M)]SSK	1
Oxidation	P00450	Ceruloplasmin	_RDTANLFPQTSLTLHMWPDTEGTFNVEC[Carbamidomethyl (C)]LTTDHYTGGM[Oxidation (M)]K	2
Oxidation	P01034	Cystatin-C	_LVGGPM[Oxidation (M)]DASVEEEGVRR	1
Oxidation	P01705	Immunoglobulin lambda variable 2-23	_LM[Oxidation (M)]IYEGSKRPSGVSNR	1
Oxidation	P07737	Profilin-1	_A[Acetyl (Protein N-term)]GWNAYIDNLM[Oxidation (M)]ADGTC[Carbamidomethyl (C)]QDAAIVGYK	3
Oxidation	P02774;P02774-3	Vitamin D-binding protein;Isoform 3 of Vitamin D-binding protein	_VM[Oxidation (M)]DKYTFELSRR	1
Oxidation	P01024	Complement C3	_NTM[Oxidation (M)]ILEIC[Carbamidomethyl (C)]TR	2
Oxidation	P01871	Immunoglobulin heavy constant mu	_YAATSQVLLPSKDVM[Oxidation (M)]QGTDEHVVC[Carbamidomethyl (C)]K	2
Oxidation	P08603	Complement factor H	_SLGNVIM[Oxidation (M)]VC[Carbamidomethyl (C)]R	2
Oxidation	P01024	Complement C3	_YFKPGM[Oxidation (M)]PFDLMVFVTNPDGSPAYR	1
Oxidation	P02671	Fibrinogen alpha chain	_M[Oxidation (M)]ADEAGSEADHEGTHSTK	1
Oxidation	P04003	C4b-binding protein alpha chain	_KPDVSHGEM[Oxidation (M)]VSGFGPIYNYKDTIVFK	1
Oxidation	P25311	Zinc-alpha-2-glycoprotein	_SQPM[Oxidation (M)]GLWR	1
Oxidation	P04114	Apolipoprotein B-100	_M[Oxidation (M)]DMTFSK	1
Oxidation	P01871	Immunoglobulin heavy constant mu	_DVM[Oxidation (M)]QGTDEHVVC[Carbamidomethyl (C)]K	2
Oxidation	P05155;P05155-3	Plasma protease C1 inhibitor;Isoform 3 of Plasma protease C1 inhibitor	_IKVTTSQDMLSIM[Oxidation (M)]EK	1
Oxidation	D6R934;P02746	Complement C1q subcomponent subunit B	_DQTIRFDHVITNM[Oxidation (M)]NNNYEPR	1
Oxidation	P60709	Actin, cytoplasmic 1	_HQGVM[Oxidation (M)]VGMGQK	1
Oxidation	P07225	Vitamin K-dependent protein S	_ITTGGDVINNGLWNM[Oxidation (M)]VSVEELEHSISIK	1
Oxidation	P01024	Complement C3	_ILLQGTPVAQM[Oxidation (M)]TEDAVDAERLK	1
Oxidation	P01782	Immunoglobulin heavy variable 3-9	_LSC[Carbamidomethyl (C)]AASGFTFDDYAM[Oxidation (M)]HWVR	2
Oxidation	B4DPQ0	Complement C1r subcomponent	_AKM[Oxidation (M)]GNFPWQVFTNIHGR	1
Oxidation	P20742	Pregnancy zone protein	_AVDQSVLLM[Oxidation (M)]KPEAELSVSSVYNLLTVK	1
Oxidation	P04004	Vitronectin	_M[Oxidation (M)]DWLVPATC[Carbamidomethyl (C)]EPIQSVFFFSGDK	2
Oxidation	P04114	Apolipoprotein B-100	_LNTDIAGLASAIDM[Oxidation (M)]STNYNSDSLHFSNVFR	1
Oxidation	P04003	C4b-binding protein alpha chain	_KPDVSHGEM[Oxidation (M)]VSGFGPIYNYK	1
Oxidation	P04114	Apolipoprotein B-100	_SLHM[Oxidation (M)]YANR	1
Oxidation	P00450	Ceruloplasmin	_MHSM[Oxidation (M)]NGFMYGNQPGLTMC[Carbamidomethyl (C)]K	2
Oxidation	P02751;P02751-15;P02751-3;P02751-7	Fibronectin;Isoform 15 of Fibronectin;Isoform 3 of Fibronectin;Isoform 7 of Fibronectin	_FTNIGPDTM[Oxidation (M)]R	1
Oxidation	P01024	Complement C3	_QPVPGQQM[Oxidation (M)]TLK	1
Oxidation	P19823	Inter-alpha-trypsin inhibitor heavy chain H2	_M[Oxidation (M)]ATTMIQSK	1
Oxidation	P00450	Ceruloplasmin	_MHSMNGFM[Oxidation (M)]YGNQPGLTMC[Carbamidomethyl (C)]K	2
Oxidation	P62328	Thymosin beta-4	_S[Acetyl (Protein N-term)]DKPDM[Oxidation (M)]AEIEKFDK	2
Oxidation	P01011	Alpha-1-antichymotrypsin	_WVMVPMM[Oxidation (M)]SLHHLTIPYFRDEELSC[Carbamidomethyl (C)]TVVELK	2
Oxidation	P00450	Ceruloplasmin	_VNKDDEEFIESNKM[Oxidation (M)]HAINGR	1
Oxidation	P0C0L5	Complement C4-B	_GLQDEDGYRM[Oxidation (M)]K	1
Oxidation	P02671	Fibrinogen alpha chain	_SYKM[Oxidation (M)]ADEAGSEADHEGTHSTK	1
Oxidation	P02751;P02751-15;P02751-3;P02751-7	Fibronectin;Isoform 15 of Fibronectin;Isoform 3 of Fibronectin;Isoform 7 of Fibronectin	_AAVYQPQPHPQPPPYGHC[Carbamidomethyl (C)]VTDSGVVYSVGM[Oxidation (M)]QWLK	2
Oxidation	P69905	Hemoglobin subunit alpha	_M[Oxidation (M)]FLSFPTTKTYFPHFDLSHGSAQVK	1
Oxidation	P02790	Hemopexin	_GEC[Carbamidomethyl (C)]QAEGVLFFQGDREWFWDLATGTM[Oxidation (M)]KER	2
Oxidation	H0YAC1;P03952	Plasma kallikrein (Fragment);Plasma kallikrein	_C[Carbamidomethyl (C)]LLFSFLPASSINDM[Oxidation (M)]EKR	2
Oxidation	P00747	Plasminogen	_FGM[Oxidation (M)]HFC[Carbamidomethyl (C)]GGTLISPEWVLTAAHC[Carbamidomethyl (C)]LEKSPRPSSYK	3
Oxidation	P20742	Pregnancy zone protein	_SGTHTLPVESGDM[Oxidation (M)]K	1
Oxidation	P07225	Vitamin K-dependent protein S	_EAVM[Oxidation (M)]DINKPGPLFKPENGLLETK	1
Oxidation	O75636	Ficolin-3	_M[Oxidation (M)]GPKGEPGDPVNLLR	1
Oxidation	P02768	Serum albumin	_M[Oxidation (M)]PC[Carbamidomethyl (C)]AEDYLSVVLNQLC[Carbamidomethyl (C)]VLHEK	3
Oxidation	P01019	Angiotensinogen	_TIHLTM[Oxidation (M)]PQLVLQGSYDLQDLLAQAELPAILHTELNLQK	1
Oxidation	P0C0L5	Complement C4-B	_NPSDPM[Oxidation (M)]PQAPALWIETTAYALLHLLLHEGKAEM[Oxidation (M)]ADQAAAWLTR	2
Oxidation	P02751;P02751-15;P02751-3;P02751-7	Fibronectin;Isoform 15 of Fibronectin;Isoform 3 of Fibronectin;Isoform 7 of Fibronectin	_FGFC[Carbamidomethyl (C)]PMAAHEEIC[Carbamidomethyl (C)]TTNEGVM[Oxidation (M)]YR	3
Oxidation	P01024	Complement C3	_SLYVSATVILHSGSDM[Oxidation (M)]VQAER	1
Oxidation	P02787	Serotransferrin	_IMNGEADAM[Oxidation (M)]SLDGGFVYIAGK	1
Oxidation	P01024	Complement C3	_YFKPGM[Oxidation (M)]PFDLM[Oxidation (M)]VFVTNPDGSPAYR	2
Oxidation	P19823	Inter-alpha-trypsin inhibitor heavy chain H2	_SILQM[Oxidation (M)]SLDHHIVTPLTSLVIENEAGDER	1
Oxidation	P01024	Complement C3	_SGQSEDRQPVPGQQM[Oxidation (M)]TLKIEGDHGAR	1
Oxidation	P23142	Fibulin-1	_M[Oxidation (M)]C[Carbamidomethyl (C)]VDVNEC[Carbamidomethyl (C)]QR	3
Oxidation	P01871	Immunoglobulin heavy constant mu	_ESDWLGQSM[Oxidation (M)]FTC[Carbamidomethyl (C)]R	2
Oxidation	P01023	Alpha-2-macroglobulin	_DMYSFLEDM[Oxidation (M)]GLK	1
Oxidation	P00450	Ceruloplasmin	_M[Oxidation (M)]YYSAVDPTK	1
Oxidation	P06396	Gelsolin	_VPEARPNSM[Oxidation (M)]VVEHPEFLK	1
Oxidation	A0A0C4DH29	Immunoglobulin heavy variable 1-3	_DTSASTAYM[Oxidation (M)]ELSSLR	1
Oxidation	A0A0B4J1V6	Immunoglobulin heavy variable 3-73	_LSC[Carbamidomethyl (C)]AASGFTFSGSAM[Oxidation (M)]HWVR	2
Oxidation	P62328	Thymosin beta-4	_S[Acetyl (Protein N-term)]DKPDM[Oxidation (M)]AEIEK	2
Oxidation	P07358	Complement component C8 beta chain	_GGASEHITTLAYQELPTADLM[Oxidation (M)]QEWGDAVQYNPAIIK	1
Oxidation	P04114	Apolipoprotein B-100	_NFATSNKM[Oxidation (M)]DMTFSK	1
Oxidation	P01008	Antithrombin-III	_DIPMNPM[Oxidation (M)]C[Carbamidomethyl (C)]IYR	2
Oxidation	P19652	Alpha-1-acid glycoprotein 2	_SDVM[Oxidation (M)]YTDWKKDK	1
Oxidation	P02751;P02751-15;P02751-3;P02751-7	Fibronectin;Isoform 15 of Fibronectin;Isoform 3 of Fibronectin;Isoform 7 of Fibronectin	_M[Oxidation (M)]SESGFK	1
Oxidation	P02751;P02751-15;P02751-3;P02751-7	Fibronectin;Isoform 15 of Fibronectin;Isoform 3 of Fibronectin;Isoform 7 of Fibronectin	_VGDTYERPKDSM[Oxidation (M)]IWDC[Carbamidomethyl (C)]TC[Carbamidomethyl (C)]IGAGR	3
Oxidation	P19823	Inter-alpha-trypsin inhibitor heavy chain H2	_SSALDM[Oxidation (M)]ENFRTEVNVLPGAK	1
Oxidation	P09871	Complement C1s subcomponent	_VEKPTADAEAYVFTPNM[Oxidation (M)]IC[Carbamidomethyl (C)]AGGEK	2
Oxidation	P01861	Immunoglobulin heavy constant gamma 4	_EPQVYTLPPSQEEM[Oxidation (M)]TKNQVSLTC[Carbamidomethyl (C)]LVK	2
Oxidation	P60709	Actin, cytoplasmic 1	_DLYANTVLSGGTTM[Oxidation (M)]YPGIADR	1
Oxidation	P01011	Alpha-1-antichymotrypsin	_KKWVMVPM[Oxidation (M)]MSLHHLTIPYFR	1
Oxidation	P01023	Alpha-2-macroglobulin	_AFQPFFVELTM[Oxidation (M)]PYSVIRGEAFTLK	1
Oxidation	P06733	Alpha-enolase	_LAM[Oxidation (M)]QEFM[Oxidation (M)]ILPVGAANFR	2
Oxidation	P01008	Antithrombin-III	_ELTPEVLQEWLDELEEMMLVVHM[Oxidation (M)]PR	1
Oxidation	P04114	Apolipoprotein B-100	_VIGNM[Oxidation (M)]GQTMEQLTPELK	1
Oxidation	P04114	Apolipoprotein B-100	_VLVDHFGYTKDDKHEQDMVNGIM[Oxidation (M)]LSVEK	1
Oxidation	P04114	Apolipoprotein B-100	_SVM[Oxidation (M)]APFTMTIDAHTNGNGK	1
Oxidation	P04114	Apolipoprotein B-100	_GISTSAASPAVGTVGM[Oxidation (M)]DM[Oxidation (M)]DEDDDFSKWNFYYSPQSSPDKK	2
Oxidation	P04114	Apolipoprotein B-100	_VLVDHFGYTKDDKHEQDM[Oxidation (M)]VNGIM[Oxidation (M)]LSVEK	2
Oxidation	B4E1Z4	cDNA FLJ55673, highly similar to Complement factor B (EC 3.4.21.47)	_HVIILM[Oxidation (M)]TDGLHNMGGDPITVIDEIRDLLYIGKDR	1
Oxidation	B4DPQ0	Complement C1r subcomponent	_M[Oxidation (M)]DVFSQNMFC[Carbamidomethyl (C)]AGHPSLK	2
Oxidation	P01024	Complement C3	_SEETKENEGFTVTAEGKGQGTLSVVTM[Oxidation (M)]YHAK	1
Oxidation	P0C0L5	Complement C4-B	_LRLEPGKEYLIM[Oxidation (M)]GLDGATYDLEGHPQYLLDSNSWIEEM[Oxidation (M)]PSER	2
Oxidation	P01031	Complement C5	_EKFSDASYQSINIPVTQNM[Oxidation (M)]VPSSR	1
Oxidation	P01031	Complement C5	_GSAEAELM[Oxidation (M)]SVVPVFYVFHYLETGNHWNIFHSDPLIEK	1
Oxidation	P07357	Complement component C8 alpha chain	_YNPVVIDFEM[Oxidation (M)]QPIHEVLR	1
Oxidation	P08603	Complement factor H	_FLM[Oxidation (M)]KGPNK	1
Oxidation	P01034	Cystatin-C	_KAFC[Carbamidomethyl (C)]SFQIYAVPWQGTM[Oxidation (M)]TLSK	2
Oxidation	Q15485	Ficolin-2	_M[Oxidation (M)]VGLEGSDKLTILR	1
Oxidation	P30043	Flavin reductase (NADPH)	_HDLGHFM[Oxidation (M)]LR	1
Oxidation	P07900;P07900-2	Heat shock protein HSP 90-alpha;Isoform 2 of Heat shock protein HSP 90-alpha	_VFIM[Oxidation (M)]DNC[Carbamidomethyl (C)]EELIPEYLNFIR	2
Oxidation	P05546	Heparin cofactor 2	_NGNM[Oxidation (M)]AGISDQR	1
Oxidation	G3XAK1;P26927	Hepatocyte growth factor-like protein	_M[Oxidation (M)]VC[Carbamidomethyl (C)]GPSGSQLVLLK	2
Oxidation	G3XAK1;P26927	Hepatocyte growth factor-like protein	_TC[Carbamidomethyl (C)]IM[Oxidation (M)]NNGVGYR	2
Oxidation	A0A0G2JMB2	Immunoglobulin heavy constant alpha 2 (Fragment)	_LAGKPTHVNVSVVM[Oxidation (M)]AEVDGTC[Carbamidomethyl (C)]Y	2
Oxidation	Q14624	Inter-alpha-trypsin inhibitor heavy chain H4	_SFAAGIQALGGTNINDAM[Oxidation (M)]LMAVQLLDSSNQEER	1
Oxidation	Q14624	Inter-alpha-trypsin inhibitor heavy chain H4	_YIFHNFM[Oxidation (M)]ER	1
Oxidation	Q14624	Inter-alpha-trypsin inhibitor heavy chain H4	_LLFKGSEM[Oxidation (M)]VVAGK	1
Oxidation	P29622	Kallistatin	_M[Oxidation (M)]REIEEVLTPEMLMR	1
Oxidation	P29622	Kallistatin	_VPMM[Oxidation (M)]LQDQEHHWYLHDR	1
Oxidation	H0YAC1;P03952	Plasma kallikrein (Fragment);Plasma kallikrein	_TQSSDGKAQM[Oxidation (M)]QSPA	1
Oxidation	H0YAC1;P03952	Plasma kallikrein (Fragment);Plasma kallikrein	_GGDVASMYTPNAQYC[Carbamidomethyl (C)]QM[Oxidation (M)]R	2
Oxidation	P20742	Pregnancy zone protein	_QAM[Oxidation (M)]GELSELSFHYLIMAK	1
Oxidation	A0A096LPE2	SAA2-SAA4 readthrough	_SFFKEALQGVGDM[Oxidation (M)]GR	1
Oxidation	P02787	Serotransferrin	_C[Carbamidomethyl (C)]QSFRDHM[Oxidation (M)]K	2
Oxidation	E9PHK0;P05452	Tetranectin	_QSVGNEAEIWLGLNDM[Oxidation (M)]AAEGTWVDMTGAR	1
Oxidation	P04275	von Willebrand factor	_GGQIM[Oxidation (M)]TLK	1
Oxidation	P04275	von Willebrand factor	_QTM[Oxidation (M)]VDSSC[Carbamidomethyl (C)]R	2
Oxidation	P25311	Zinc-alpha-2-glycoprotein	_KSQPM[Oxidation (M)]GLWR	1
Oxidation	A0A0G2JMB2	Immunoglobulin heavy constant alpha 2 (Fragment)	_KGDTFSC[Carbamidomethyl (C)]M[Oxidation (M)]VGHEALPLAFTQK	2
Oxidation	P01009	Alpha-1-antitrypsin	_FNKPFVFLM[Oxidation (M)]IEQNTKSPLFM[Oxidation (M)]GK	2
Oxidation	P08571	Monocyte differentiation antigen CD14	_NTGM[Oxidation (M)]ETPTGVC[Carbamidomethyl (C)]AALAAAGVQPHSLDLSHNSLR	2
Oxidation	P19652	Alpha-1-acid glycoprotein 2	_SDVM[Oxidation (M)]YTDWKK	1
Oxidation	P01009	Alpha-1-antitrypsin	_SPLFM[Oxidation (M)]GK	1
Oxidation	P02768	Serum albumin	_NYAEAKDVFLGM[Oxidation (M)]FLYEYAR	1
Oxidation	P01024	Complement C3	_KC[Carbamidomethyl (C)]C[Carbamidomethyl (C)]EDGM[Oxidation (M)]RENPMR	3
Oxidation	P0C0L5	Complement C4-B	_VFREFHLHLRLPM[Oxidation (M)]SVR	1
Oxidation	P05546	Heparin cofactor 2	_M[Oxidation (M)]LFDKNGNMAGISDQR	1
Oxidation	P01742	Immunoglobulin heavy variable 1-69	_STSTAYM[Oxidation (M)]ELSSLR	1
Oxidation	P01042	Kininogen-1	_KIYPTVNC[Carbamidomethyl (C)]QPLGM[Oxidation (M)]ISLM[Oxidation (M)]K	3
Oxidation	P05155;P05155-3	Plasma protease C1 inhibitor;Isoform 3 of Plasma protease C1 inhibitor	_VPM[Oxidation (M)]M[Oxidation (M)]NSK	2
Oxidation	P00734	Prothrombin	_QEC[Carbamidomethyl (C)]SIPVC[Carbamidomethyl (C)]GQDQVTVAM[Oxidation (M)]TPR	3
Oxidation	A0A0J9YY99	Uncharacterized protein (Fragment)	_LSC[Carbamidomethyl (C)]AASGFTFSSYGM[Oxidation (M)]HWVR	2
Oxidation	P02774;P02774-3	Vitamin D-binding protein;Isoform 3 of Vitamin D-binding protein	_LC[Carbamidomethyl (C)]M[Oxidation (M)]AALK	2
Oxidation	P08603	Complement factor H	_TDC[Carbamidomethyl (C)]LSLPSFENAIPM[Oxidation (M)]GEK	2
Oxidation	Q06033;Q06033-2	Inter-alpha-trypsin inhibitor heavy chain H3;Isoform 2 of Inter-alpha-trypsin inhibitor heavy chain H3	_SM[Oxidation (M)]EDKGMTNINDGLLR	1
Oxidation	P04114	Apolipoprotein B-100	_M[Oxidation (M)]TSNFPVDLSDYPK	1
Oxidation	P09871	Complement C1s subcomponent	_MGPTVSPIC[Carbamidomethyl (C)]LPGTSSDYNLM[Oxidation (M)]DGDLGLISGWGR	2
Oxidation	P02768	Serum albumin	_SHC[Carbamidomethyl (C)]IAEVENDEM[Oxidation (M)]PADLPSLAADFVESKDVC[Carbamidomethyl (C)]KNYAEAK	3
Oxidation	P0C0L5	Complement C4-B	_LRLEPGKEYLIMGLDGATYDLEGHPQYLLDSNSWIEEM[Oxidation (M)]PSER	1
Oxidation	P01031	Complement C5	_M[Oxidation (M)]VETTAYALLTSLNLK	1
Oxidation	P02671	Fibrinogen alpha chain	_M[Oxidation (M)]ADEAGSEADHEGTHSTKR	1
Oxidation	P02751;P02751-15;P02751-3;P02751-7	Fibronectin;Isoform 15 of Fibronectin;Isoform 3 of Fibronectin;Isoform 7 of Fibronectin	_VTIM[Oxidation (M)]WTPPESAVTGYRVDVIPVNLPGEHGQR	1
Oxidation	P19827	Inter-alpha-trypsin inhibitor heavy chain H1	_ANLSSQALQM[Oxidation (M)]SLDYGFVTPLTSMSIR	1
Oxidation	P00747	Plasminogen	_EQQC[Carbamidomethyl (C)]VIM[Oxidation (M)]AENR	2
Oxidation	P43652	Afamin	_IC[Carbamidomethyl (C)]AM[Oxidation (M)]EGLPQK	2
Oxidation	P19827	Inter-alpha-trypsin inhibitor heavy chain H1	_ILGDM[Oxidation (M)]QPGDYFDLVLFGTR	1
Oxidation	P04114	Apolipoprotein B-100	_TKNSEEFAAAM[Oxidation (M)]SR	1
Oxidation	P02747	Complement C1q subcomponent subunit C	_NGPM[Oxidation (M)]GPPGM[Oxidation (M)]PGVPGPM[Oxidation (M)]GIPGEPGEEGRYK	3
Oxidation	P0C0L5	Complement C4-B	_TLEIPGNSDPNM[Oxidation (M)]IPDGDFNSYVR	1
Oxidation	P01009	Alpha-1-antitrypsin	_AVLTIDEKGTEAAGAMFLEAIPM[Oxidation (M)]SIPPEVK	1
Oxidation	P01024	Complement C3	_VQLSNDFDEYIM[Oxidation (M)]AIEQTIKSGSDEVQVGQQR	1
Oxidation	P02787	Serotransferrin	_TAGWNIPM[Oxidation (M)]GLLYNKINHC[Carbamidomethyl (C)]R	2
Oxidation	P01031	Complement C5	_M[Oxidation (M)]PITYDNGFLFIHTDKPVYTPDQSVK	1
Oxidation	P01011	Alpha-1-antichymotrypsin	_FNRPFLMIIVPTDTQNIFFM[Oxidation (M)]SK	1
Oxidation	P15814	Immunoglobulin lambda-like polypeptide 1	_SYSC[Carbamidomethyl (C)]QVM[Oxidation (M)]HEGSTVEK	2
Oxidation	P01024	Complement C3	_DSITTWEILAVSM[Oxidation (M)]SDKK	1
Oxidation	Q96PD5	N-acetylmuramoyl-L-alanine amidase	_HTASAWLM[Oxidation (M)]SAPNSGPHNR	1
Oxidation	P02787	Serotransferrin	_IM[Oxidation (M)]NGEADAM[Oxidation (M)]SLDGGFVYIAGK	2
Oxidation	A0A0C4DH33	Immunoglobulin heavy variable 1-24	_VTM[Oxidation (M)]TEDTSTDTAYMELSSLR	1
Oxidation	P02751;P02751-15;P02751-3;P02751-7	Fibronectin;Isoform 15 of Fibronectin;Isoform 3 of Fibronectin;Isoform 7 of Fibronectin	_FGFC[Carbamidomethyl (C)]PM[Oxidation (M)]AAHEEIC[Carbamidomethyl (C)]TTNEGVMYR	3
Oxidation	P02790	Hemopexin	_VDGALC[Carbamidomethyl (C)]M[Oxidation (M)]EK	2
Oxidation	P04114	Apolipoprotein B-100	_TFQIPGYTVPVVNVEVSPFTIEM[Oxidation (M)]SAFGYVFPK	1
Oxidation	P01024	Complement C3	_HLIVTPSGC[Carbamidomethyl (C)]GEQNM[Oxidation (M)]IGMTPTVIAVHYLDETEQWEK	2
Oxidation	B4DPQ0	Complement C1r subcomponent	_YTTTM[Oxidation (M)]GVNTYK	1
Oxidation	P02768	Serum albumin	_AVM[Oxidation (M)]DDFAAFVEKC[Carbamidomethyl (C)]C[Carbamidomethyl (C)]K	3
Oxidation	P43652	Afamin	_VM[Oxidation (M)]NHIC[Carbamidomethyl (C)]SK	2
Oxidation	O14791;O14791-2	Apolipoprotein L1;Isoform 2 of Apolipoprotein L1	_VQQNVPSGTDTGDPQSKPLGDWAAGTM[Oxidation (M)]DPESSIFIEDAIK	1
Oxidation	P0C0L5	Complement C4-B	_M[Oxidation (M)]RPSTDTITVM[Oxidation (M)]VENSHGLR	2
Oxidation	P01031	Complement C5	_ETVLTFIDPEGSEVDM[Oxidation (M)]VEEIDHIGIISFPDFK	1
Oxidation	P01031	Complement C5	_VFKDVFLEM[Oxidation (M)]NIPYSVVR	1
Oxidation	P01031	Complement C5	_M[Oxidation (M)]SAVEGIC[Carbamidomethyl (C)]TSESPVIDHQGTK	2
Oxidation	P41222	Prostaglandin-H2 D-isomerase	_TM[Oxidation (M)]LLQPAGSLGSYSYR	1
Oxidation	P19652	Alpha-1-acid glycoprotein 2	_TLM[Oxidation (M)]FGSYLDDEKNWGLSFYADKPETTK	1
Oxidation	P08603	Complement factor H	_IVSSAM[Oxidation (M)]EPDREYHFGQAVR	1
Oxidation	P19823	Inter-alpha-trypsin inhibitor heavy chain H2	_SSALDM[Oxidation (M)]ENFR	1
Oxidation	P05546	Heparin cofactor 2	_VSMM[Oxidation (M)]QTK	1
Oxidation	P00739	Haptoglobin-related protein	_YVM[Oxidation (M)]LPVADQYDC[Carbamidomethyl (C)]ITHYEGSTC[Carbamidomethyl (C)]PK	3
Oxidation	P00747	Plasminogen	_C[Carbamidomethyl (C)]QSWSSM[Oxidation (M)]TPHR	2
Oxidation	P00450	Ceruloplasmin	_MYYSAVDPTKDIFTGLIGPM[Oxidation (M)]K	1
Oxidation	P01860	Immunoglobulin heavy constant gamma 3	_SRWQQGNIFSC[Carbamidomethyl (C)]SVM[Oxidation (M)]HEALHNR	2
Oxidation	P02760	Protein AMBP	_KEDSC[Carbamidomethyl (C)]QLGYSAGPC[Carbamidomethyl (C)]M[Oxidation (M)]GMTSR	3
Oxidation	P01023	Alpha-2-macroglobulin	_AVDQSVLLM[Oxidation (M)]KPDAELSASSVYNLLPEK	1
Oxidation	P01024	Complement C3	_YYTYLIM[Oxidation (M)]NK	1
Oxidation	P01011	Alpha-1-antichymotrypsin	_FNRPFLM[Oxidation (M)]IIVPTDTQNIFFMSK	1
Oxidation	P43652	Afamin	_C[Carbamidomethyl (C)]M[Oxidation (M)]ADKTLPEC[Carbamidomethyl (C)]SKLPNNVLQEK	3
Oxidation	P01023	Alpha-2-macroglobulin	_HNVYINGITYTPVSSTNEKDMYSFLEDM[Oxidation (M)]GLK	1
Oxidation	P01023	Alpha-2-macroglobulin	_KLSFYYLIM[Oxidation (M)]AK	1
Oxidation	P01023	Alpha-2-macroglobulin	_SSSNEEVM[Oxidation (M)]FLTVQVKGPTQEFK	1
Oxidation	P01008	Antithrombin-III	_ELFYKADGESC[Carbamidomethyl (C)]SASM[Oxidation (M)]MYQEGK	2
Oxidation	P02647	Apolipoprotein A-I	_QEM[Oxidation (M)]SKDLEEVK	1
Oxidation	P04114	Apolipoprotein B-100	_KM[Oxidation (M)]GLAFESTK	1
Oxidation	P08519	Apolipoprotein(a)	_NPDAEIRPWC[Carbamidomethyl (C)]YTM[Oxidation (M)]DPSVR	2
Oxidation	P08519	Apolipoprotein(a)	_TC[Carbamidomethyl (C)]QSWSSM[Oxidation (M)]IPHWHQR	2
Oxidation	P33151	Cadherin-5	_YM[Oxidation (M)]SPPAGNR	1
Oxidation	B4E1Z4	cDNA FLJ55673, highly similar to Complement factor B (EC 3.4.21.47)	_LLGMETMAWQEIRHAIILLTDGKSNM[Oxidation (M)]GGSPK	1
Oxidation	B4E1Z4	cDNA FLJ55673, highly similar to Complement factor B (EC 3.4.21.47)	_M[Oxidation (M)]STHARPIC[Carbamidomethyl (C)]LPC[Carbamidomethyl (C)]TMEANLALR	3
Oxidation	P00450	Ceruloplasmin	_NM[Oxidation (M)]ATRPYSIHAHGVQTESSTVTPTLPGETLTYVWKIPER	1
Oxidation	P00450	Ceruloplasmin	_MYYSAVDPTKDIFTGLIGPM[Oxidation (M)]KIC[Carbamidomethyl (C)]K	2
Oxidation	P10909;P10909-2;P10909-4;P10909-5	Clusterin;Isoform 2 of Clusterin;Isoform 4 of Clusterin;Isoform 5 of Clusterin	_QQTHMLDVM[Oxidation (M)]QDHFSR	1
Oxidation	P01024	Complement C3	_YRGDQDATM[Oxidation (M)]SILDISMMTGFAPDTDDLKQLANGVDR	1
Oxidation	P0C0L5	Complement C4-B	_TYNVLDM[Oxidation (M)]K	1
Oxidation	P01031	Complement C5	_LKEGMLSIM[Oxidation (M)]SYR	1
Oxidation	P01031	Complement C5	_TSGM[Oxidation (M)]QFC[Carbamidomethyl (C)]VK	2
Oxidation	P10643	Complement component C7	_M[Oxidation (M)]PYEC[Carbamidomethyl (C)]GPSLDVC[Carbamidomethyl (C)]AQDER	3
Oxidation	P07357	Complement component C8 alpha chain	_SLKYNPVVIDFEM[Oxidation (M)]QPIHEVLR	1
Oxidation	P07357	Complement component C8 alpha chain	_KDDIMLDEGMLQSLM[Oxidation (M)]ELPDQYNYGMYAK	1
Oxidation	P08603	Complement factor H	_SLGNVIM[Oxidation (M)]VC[Carbamidomethyl (C)]RK	2
Oxidation	P02679;P02679-2	Fibrinogen gamma chain;Isoform Gamma-A of Fibrinogen gamma chain	_TTM[Oxidation (M)]KIIPFNRLTIGEGQQHHLGGAK	1
Oxidation	P02679;P02679-2	Fibrinogen gamma chain;Isoform Gamma-A of Fibrinogen gamma chain	_M[Oxidation (M)]LEEIMKYEASILTHDSSIR	1
Oxidation	P02751;P02751-15;P02751-3;P02751-7	Fibronectin;Isoform 15 of Fibronectin;Isoform 3 of Fibronectin;Isoform 7 of Fibronectin	_EINLAPDSSSVVVSGLM[Oxidation (M)]VATK	1
Oxidation	P02751;P02751-15;P02751-3;P02751-7	Fibronectin;Isoform 15 of Fibronectin;Isoform 3 of Fibronectin;Isoform 7 of Fibronectin	_IGDQWDKQHDMGHM[Oxidation (M)]MR	1
Oxidation	P06396	Gelsolin	_VPFDAATLHTSTAM[Oxidation (M)]AAQHGM[Oxidation (M)]DDDGTGQK	2
Oxidation	P68871	Hemoglobin subunit beta	_LLVVYPWTQRFFESFGDLSTPDAVM[Oxidation (M)]GNPK	1
Oxidation	Q04756	Hepatocyte growth factor activator	_M[Oxidation (M)]LHAC[Carbamidomethyl (C)]TSEGSAHR	2
Oxidation	A0A0A0MS15	Immunoglobulin heavy variable 3-49	_SIAYLQM[Oxidation (M)]NSLK	1
Oxidation	Q14624	Inter-alpha-trypsin inhibitor heavy chain H4	_SFAAGIQALGGTNINDAMLM[Oxidation (M)]AVQLLDSSNQEER	1
Oxidation	P23142-4	Isoform C of Fibulin-1	_MGPSSAVPGDSM[Oxidation (M)]QLAITGGNEEGFFTTR	1
Oxidation	P18428	Lipopolysaccharide-binding protein	_SPVTLLAAVM[Oxidation (M)]SLPEEHNK	1
Oxidation	P62937	Peptidyl-prolyl cis-trans isomerase A	_HTGPGILSM[Oxidation (M)]ANAGPNTNGSQFFIC[Carbamidomethyl (C)]TAK	2
Oxidation	H0YAC1;P03952	Plasma kallikrein (Fragment);Plasma kallikrein	_LSM[Oxidation (M)]DGSPTR	1
Oxidation	H0YAC1;P03952	Plasma kallikrein (Fragment);Plasma kallikrein	_M[Oxidation (M)]VC[Carbamidomethyl (C)]AGYK	2
Oxidation	P02760	Protein AMBP	_EDSC[Carbamidomethyl (C)]QLGYSAGPC[Carbamidomethyl (C)]MGM[Oxidation (M)]TSR	3
Oxidation	P06702	Protein S100-A9	_VIEHIMEDLDTNADKQLSFEEFIM[Oxidation (M)]LMAR	1
Oxidation	P02753;Q5VY30	Retinol-binding protein 4;Retinol binding protein 4, plasma, isoform CRA_b	_KDPEGLFLQDNIVAEFSVDETGQM[Oxidation (M)]SATAK	1
Oxidation	P05543	Thyroxine-binding globulin	_QEINSHVEM[Oxidation (M)]QTK	1
Oxidation	P01023	Alpha-2-macroglobulin	_M[Oxidation (M)]C[Carbamidomethyl (C)]PQLQQYEMHGPEGLR	2
Oxidation	P01024	Complement C3	_LESEETM[Oxidation (M)]VLEAHDAQGDVPVTVTVHDFPGKK	1
Oxidation	P00738	Haptoglobin	_SPVGVQPILNEHTFC[Carbamidomethyl (C)]AGM[Oxidation (M)]SK	2
Oxidation	P00738	Haptoglobin	_YVM[Oxidation (M)]LPVADQDQC[Carbamidomethyl (C)]IR	2
Oxidation	P01859	Immunoglobulin heavy constant gamma 2	_TTPPM[Oxidation (M)]LDSDGSFFLYSK	1
Oxidation	P19827	Inter-alpha-trypsin inhibitor heavy chain H1	_GM[Oxidation (M)]ADQDGLKPTIDKPSEDSPPLEMLGPR	1
Oxidation	P04114	Apolipoprotein B-100	_GM[Oxidation (M)]ALFGEGKAEFTGR	1
Oxidation	P10643	Complement component C7	_DGFVQDEGTM[Oxidation (M)]FPVGK	1
Oxidation	P04196	Histidine-rich glycoprotein	_SGFPQVSM[Oxidation (M)]FFTHTFPK	1
Oxidation	P02760	Protein AMBP	_EDSC[Carbamidomethyl (C)]QLGYSAGPC[Carbamidomethyl (C)]M[Oxidation (M)]GMTSR	3
Oxidation	P19652	Alpha-1-acid glycoprotein 2	_SDVM[Oxidation (M)]YTDWK	1
Oxidation	P01023	Alpha-2-macroglobulin	_SSSNEEVM[Oxidation (M)]FLTVQVK	1
Oxidation	P01024	Complement C3	_NNNEKDM[Oxidation (M)]ALTAFVLISLQEAK	1
Oxidation	P01024	Complement C3	_QKPDGVFQEDAPVIHQEM[Oxidation (M)]IGGLR	1
Oxidation	P09871	Complement C1s subcomponent	_M[Oxidation (M)]LTPEHVFIHPGWK	1
Oxidation	P04217	Alpha-1B-glycoprotein	_SGLSTGWTQLSKLLELTGPKSLPAPWLSM[Oxidation (M)]APVSWITPGLK	1
Oxidation	P19823	Inter-alpha-trypsin inhibitor heavy chain H2	_MATTM[Oxidation (M)]IQSK	1
Oxidation	P00450	Ceruloplasmin	_HRGVYSSDVFDIFPGTYQTLEM[Oxidation (M)]FPR	1
Oxidation	P19827	Inter-alpha-trypsin inhibitor heavy chain H1	_GMADQDGLKPTIDKPSEDSPPLEM[Oxidation (M)]LGPR	1
Oxidation	P02790	Hemopexin	_SGAQATWTELPWPHEKVDGALC[Carbamidomethyl (C)]M[Oxidation (M)]EK	2
Oxidation	P08603	Complement factor H	_SC[Carbamidomethyl (C)]DIPVFM[Oxidation (M)]NAR	2
Oxidation	P07358	Complement component C8 beta chain	_DTM[Oxidation (M)]VEDLVVLVR	1
Oxidation	P01009	Alpha-1-antitrypsin	_GTEAAGAMFLEAIPM[Oxidation (M)]SIPPEVK	1
Oxidation	P69905	Hemoglobin subunit alpha	_M[Oxidation (M)]FLSFPTTK	1
Oxidation	P04114	Apolipoprotein B-100	_LSNDM[Oxidation (M)]MGSYAEMK	1
Oxidation	P01871	Immunoglobulin heavy constant mu	_GGKYAATSQVLLPSKDVM[Oxidation (M)]QGTDEHVVC[Carbamidomethyl (C)]K	2
Oxidation	P05164;P05164-2;P05164-3	Myeloperoxidase;Isoform H14 of Myeloperoxidase;Isoform H7 of Myeloperoxidase	_LFEQVM[Oxidation (M)]R	1
Oxidation	P02679;P02679-2	Fibrinogen gamma chain;Isoform Gamma-A of Fibrinogen gamma chain	_AIQLTYNPDESSKPNM[Oxidation (M)]IDAATLK	1
Oxidation	P01023	Alpha-2-macroglobulin	_VVSM[Oxidation (M)]DENFHPLNELIPLVYIQDPK	1
Oxidation	P01023	Alpha-2-macroglobulin	_VGFYESDVM[Oxidation (M)]GR	1
Oxidation	P01857	Immunoglobulin heavy constant gamma 1	_WQQGNVFSC[Carbamidomethyl (C)]SVM[Oxidation (M)]HEALHNHYTQK	2
Oxidation	P06727	Apolipoprotein A-IV	_ALVQQM[Oxidation (M)]EQLR	1
Oxidation	P06727	Apolipoprotein A-IV	_ESQDKTLSLPELEQQQEQQQEQQQEQVQM[Oxidation (M)]LAPLES	1
Oxidation	P02649	Apolipoprotein E	_ALM[Oxidation (M)]DETMK	1
Oxidation	P02749	Beta-2-glycoprotein 1	_LGNWSAM[Oxidation (M)]PSC[Carbamidomethyl (C)]K	2
Oxidation	P09871	Complement C1s subcomponent	_M[Oxidation (M)]GPTVSPIC[Carbamidomethyl (C)]LPGTSSDYNLM[Oxidation (M)]DGDLGLISGWGR	3
Oxidation	E7ETH0;G3XAM2;P05156	Complement factor I	_TM[Oxidation (M)]GYQDFADVVC[Carbamidomethyl (C)]YTQK	2
Oxidation	A0A0B4J1Y9	Immunoglobulin heavy variable 3-72	_NSLYLQM[Oxidation (M)]NSLK	1
Oxidation	P29622	Kallistatin	_M[Oxidation (M)]DYKGDATVFFILPNQGK	1
Oxidation	P61626	Lysozyme C	_LGM[Oxidation (M)]DGYR	1
Oxidation	P00747	Plasminogen	_EQQC[Carbamidomethyl (C)]VIM[Oxidation (M)]AENRK	2
Oxidation	P02753;Q5VY30	Retinol-binding protein 4;Retinol binding protein 4, plasma, isoform CRA_b	_M[Oxidation (M)]KYWGVASFLQK	1
Oxidation	P01011	Alpha-1-antichymotrypsin	_FNRPFLM[Oxidation (M)]IIVPTDTQNIFFM[Oxidation (M)]SK	2
Oxidation	P01019	Angiotensinogen	_SLDFTELDVAAEKIDRFM[Oxidation (M)]QAVTGWK	1
Oxidation	P02647	Apolipoprotein A-I	_QEM[Oxidation (M)]SKDLEEVKAK	1
Oxidation	P00450	Ceruloplasmin	_RDTANLFPQTSLTLHM[Oxidation (M)]WPDTEGTFNVEC[Carbamidomethyl (C)]LTTDHYTGGM[Oxidation (M)]K	3
Oxidation	D6R934;P02746	Complement C1q subcomponent subunit B	_NSLLGM[Oxidation (M)]EGANSIFSGFLLFPDMEA	1
Oxidation	P06396	Gelsolin	_EPAHLMSLFGGKPM[Oxidation (M)]IIYKGGTSR	1
Oxidation	P06396	Gelsolin	_VVQGKEPAHLM[Oxidation (M)]SLFGGKPMIIYK	1
Oxidation	P06396	Gelsolin	_VHVSEEGTEPEAM[Oxidation (M)]LQVLGPKPALPAGTEDTAKEDAANR	1
Oxidation	P01861	Immunoglobulin heavy constant gamma 4	_SRWQEGNVFSC[Carbamidomethyl (C)]SVM[Oxidation (M)]HEALHNHYTQK	2
Oxidation	P01782	Immunoglobulin heavy variable 3-9	_DNAKNSLYLQM[Oxidation (M)]NSLR	1
Oxidation	P05155;P05155-3	Plasma protease C1 inhibitor;Isoform 3 of Plasma protease C1 inhibitor	_IKVTTSQDM[Oxidation (M)]LSIM[Oxidation (M)]EK	2
Oxidation	P00738	Haptoglobin	_VM[Oxidation (M)]PIC[Carbamidomethyl (C)]LPSK	2
Oxidation	P01023	Alpha-2-macroglobulin	_QEDM[Oxidation (M)]KGHFSISIPVK	1
Oxidation	P02647	Apolipoprotein A-I	_VQPYLDDFQKKWQEEM[Oxidation (M)]ELYR	1
Oxidation	P01591	Immunoglobulin J chain	_M[Oxidation (M)]VETALTPDAC[Carbamidomethyl (C)]YPD	2
Oxidation	P01023	Alpha-2-macroglobulin	_APVGHFYEPQAPSAEVEM[Oxidation (M)]TSYVLLAYLTAQPAPTSEDLTSATNIVK	1
Oxidation	P69905	Hemoglobin subunit alpha	_VADALTNAVAHVDDM[Oxidation (M)]PNALSALSDLHAHK	1
Oxidation	P02768	Serum albumin	_ETYGEM[Oxidation (M)]ADC[Carbamidomethyl (C)]C[Carbamidomethyl (C)]AKQEPER	3
Oxidation	P01024	Complement C3	_YRGDQDATMSILDISM[Oxidation (M)]MTGFAPDTDDLK	1
Oxidation	P01023	Alpha-2-macroglobulin	_AFQPFFVELTM[Oxidation (M)]PYSVIRGEAFTLKATVLNYLPK	1
Oxidation	P00450	Ceruloplasmin	_DTANLFPQTSLTLHMWPDTEGTFNVEC[Carbamidomethyl (C)]LTTDHYTGGM[Oxidation (M)]K	2
Oxidation	P01024	Complement C3	_IRYYTYLIM[Oxidation (M)]NKGR	1
Oxidation	P0C0L5	Complement C4-B	_SM[Oxidation (M)]QGGLVGNDETVALTAFVTIALHHGLAVFQDEGAEPLK	1
Oxidation	P02751;P02751-15;P02751-3;P02751-7	Fibronectin;Isoform 15 of Fibronectin;Isoform 3 of Fibronectin;Isoform 7 of Fibronectin	_VTIM[Oxidation (M)]WTPPESAVTGYR	1
Oxidation	P05155;P05155-3	Plasma protease C1 inhibitor;Isoform 3 of Plasma protease C1 inhibitor	_NSVIKVPM[Oxidation (M)]MNSK	1
Oxidation	P04004	Vitronectin	_IYISGM[Oxidation (M)]APR	1
Oxidation	P02763	Alpha-1-acid glycoprotein 1	_TYM[Oxidation (M)]LAFDVNDEKNWGLSVYADKPETTK	1
Oxidation	P19827	Inter-alpha-trypsin inhibitor heavy chain H1	_NHM[Oxidation (M)]QYEIVIK	1
Oxidation	P19827	Inter-alpha-trypsin inhibitor heavy chain H1	_TM[Oxidation (M)]EQFTIHLTVNPQSK	1
Oxidation	P01024	Complement C3	_M[Oxidation (M)]DKVGKYPK	1
Oxidation	P06396	Gelsolin	_VSNGAGTM[Oxidation (M)]SVSLVADENPFAQGALK	1
Oxidation	A0A0C4DH38	Immunoglobulin heavy variable 5-51	_GLEWM[Oxidation (M)]GIIYPGDSDTR	1
Oxidation	P02787	Serotransferrin	_KDSGFQM[Oxidation (M)]NQLR	1
Oxidation	P08603	Complement factor H	_AQTTVTC[Carbamidomethyl (C)]M[Oxidation (M)]ENGWSPTPR	2
Oxidation	P00739	Haptoglobin-related protein	_SPVGVQPILNEHTFC[Carbamidomethyl (C)]VGM[Oxidation (M)]SK	2
Oxidation	P01861	Immunoglobulin heavy constant gamma 4	_WQEGNVFSC[Carbamidomethyl (C)]SVM[Oxidation (M)]HEALHNHYTQK	2
Oxidation	P01008	Antithrombin-III	_ADGESC[Carbamidomethyl (C)]SASMM[Oxidation (M)]YQEGK	2
Oxidation	P06681	Complement C2	_VLM[Oxidation (M)]SVLNDNSR	1
Oxidation	P0C0L5	Complement C4-B	_NPSDPM[Oxidation (M)]PQAPALWIETTAYALLHLLLHEGKAEMADQAAAWLTR	1
Oxidation	P06396	Gelsolin	_VVQGKEPAHLMSLFGGKPM[Oxidation (M)]IIYK	1
Oxidation	A0A0B4J1V2	Immunoglobulin heavy variable 2-26	_M[Oxidation (M)]GVSWIR	1
Oxidation	P19823	Inter-alpha-trypsin inhibitor heavy chain H2	_M[Oxidation (M)]ATTM[Oxidation (M)]IQSK	2
Oxidation	P05155;P05155-3	Plasma protease C1 inhibitor;Isoform 3 of Plasma protease C1 inhibitor	_TLLVFEVQQPFLFVLWDQQHKFPVFM[Oxidation (M)]GR	1
Oxidation	P02647	Apolipoprotein A-I	_LSPLGEEM[Oxidation (M)]RDR	1
Oxidation	P60709	Actin, cytoplasmic 1	_EITALAPSTM[Oxidation (M)]K	1
Oxidation	P00450	Ceruloplasmin	_M[Oxidation (M)]YSVNGYTFGSLPGLSMC[Carbamidomethyl (C)]AEDRVK	2
Oxidation	P00450	Ceruloplasmin	_MHSM[Oxidation (M)]NGFM[Oxidation (M)]YGNQPGLTMC[Carbamidomethyl (C)]K	3
Oxidation	A0A0B4J1V0	Immunoglobulin heavy variable 3-15	_NTLYLQM[Oxidation (M)]NSLK	1
Oxidation	P05155;P05155-3	Plasma protease C1 inhibitor;Isoform 3 of Plasma protease C1 inhibitor	_LYHAFSAM[Oxidation (M)]KK	1
Oxidation	P04114	Apolipoprotein B-100	_M[Oxidation (M)]GLAFESTK	1
Oxidation	P02774;P02774-3	Vitamin D-binding protein;Isoform 3 of Vitamin D-binding protein	_TAMDVFVC[Carbamidomethyl (C)]TYFM[Oxidation (M)]PAAQLPELPDVELPTNKDVC[Carbamidomethyl (C)]DPGNTK	3
Oxidation	P60709	Actin, cytoplasmic 1	_TTGIVM[Oxidation (M)]DSGDGVTHTVPIYEGYALPHAILR	1
Oxidation	P02649	Apolipoprotein E	_MEEM[Oxidation (M)]GSR	1
Oxidation	P05543	Thyroxine-binding globulin	_EGQM[Oxidation (M)]ESVEAAMSSK	1
Oxidation	P01861	Immunoglobulin heavy constant gamma 4	_LTVDKSRWQEGNVFSC[Carbamidomethyl (C)]SVM[Oxidation (M)]HEALHNHYTQK	2
Oxidation	P01008	Antithrombin-III	_EVPLNTIIFM[Oxidation (M)]GR	1
Oxidation	P01024	Complement C3	_DM[Oxidation (M)]ALTAFVLISLQEAKDIC[Carbamidomethyl (C)]EEQVNSLPGSITK	2
Oxidation	P06396	Gelsolin	_EPAHLM[Oxidation (M)]SLFGGKPMIIYKGGTSR	1
Oxidation	P01042	Kininogen-1	_IYPTVNC[Carbamidomethyl (C)]QPLGM[Oxidation (M)]ISLMK	2
Oxidation	P01042	Kininogen-1	_KIYPTVNC[Carbamidomethyl (C)]QPLGM[Oxidation (M)]ISLMK	2
Oxidation	P00747	Plasminogen	_C[Carbamidomethyl (C)]SGTEASVVAPPPVVLLPDVETPSEEDC[Carbamidomethyl (C)]M[Oxidation (M)]FGNGK	3
Oxidation	P02760	Protein AMBP	_VVAQGVGIPEDSIFTM[Oxidation (M)]ADR	1
Oxidation	P01024	Complement C3	_TVM[Oxidation (M)]VNIENPEGIPVKQDSLSSQNQLGVLPLSWDIPELVNM[Oxidation (M)]GQWK	2
Oxidation	E9PFZ2	Ceruloplasmin	_M[Oxidation (M)]YYSAVEPTKDIFTGLIGPMK	1
Oxidation	P01008	Antithrombin-III	_EQLQDM[Oxidation (M)]GLVDLFSPEK	1
Oxidation	P01008	Antithrombin-III	_ADGESC[Carbamidomethyl (C)]SASM[Oxidation (M)]MYQEGK	2
Oxidation	P02751;P02751-15;P02751-3;P02751-7	Fibronectin;Isoform 15 of Fibronectin;Isoform 3 of Fibronectin;Isoform 7 of Fibronectin	_DSM[Oxidation (M)]IWDC[Carbamidomethyl (C)]TC[Carbamidomethyl (C)]IGAGR	3
Oxidation	P06396	Gelsolin	_M[Oxidation (M)]DAHPPR	1
Oxidation	P01011	Alpha-1-antichymotrypsin	_AKWEM[Oxidation (M)]PFDPQDTHQSR	1
Oxidation	P02749	Beta-2-glycoprotein 1	_GGM[Oxidation (M)]RKFIC[Carbamidomethyl (C)]PLTGLWPINTLK	2
Oxidation	P02749	Beta-2-glycoprotein 1	_FKNGM[Oxidation (M)]LHGDKVSFFC[Carbamidomethyl (C)]K	2
Oxidation	P01009	Alpha-1-antitrypsin	_FNKPFVFLMIEQNTKSPLFM[Oxidation (M)]GK	1
Oxidation	P01024	Complement C3	_QDSLSSQNQLGVLPLSWDIPELVNM[Oxidation (M)]GQWK	1
Oxidation	P05155;P05155-3	Plasma protease C1 inhibitor;Isoform 3 of Plasma protease C1 inhibitor	_VPM[Oxidation (M)]MNSK	1
Oxidation	P0C0L5	Complement C4-B	_LRLEPGKEYLIM[Oxidation (M)]GLDGATYDLEGHPQYLLDSNSWIEEMPSER	1
Oxidation	A0A0C4DH31	Immunoglobulin heavy variable 1-18	_VTM[Oxidation (M)]TTDTSTSTAYMELR	1
Oxidation	P08603	Complement factor H	_C[Carbamidomethyl (C)]NM[Oxidation (M)]GYEYSER	2
Oxidation	P05155;P05155-3	Plasma protease C1 inhibitor;Isoform 3 of Plasma protease C1 inhibitor	_KVETNM[Oxidation (M)]AFSPFSIASLLTQVLLGAGENTK	1
Oxidation	P02774;P02774-3	Vitamin D-binding protein;Isoform 3 of Vitamin D-binding protein	_KLC[Carbamidomethyl (C)]M[Oxidation (M)]AALK	2
Oxidation	P01023	Alpha-2-macroglobulin	_FQVDNNNRLLLQQVSLPELPGEYSM[Oxidation (M)]K	1
Oxidation	P0C0L5	Complement C4-B	_EYLIM[Oxidation (M)]GLDGATYDLEGHPQYLLDSNSWIEEMPSER	1
Oxidation	P02649	Apolipoprotein E	_LGADM[Oxidation (M)]EDVC[Carbamidomethyl (C)]GR	2
Oxidation	Q14624	Inter-alpha-trypsin inhibitor heavy chain H4	_GSEM[Oxidation (M)]VVAGK	1
Oxidation	P00450	Ceruloplasmin	_DTANLFPQTSLTLHM[Oxidation (M)]WPDTEGTFNVEC[Carbamidomethyl (C)]LTTDHYTGGMK	2
Oxidation	P08603	Complement factor H	_FVC[Carbamidomethyl (C)]NSGYKIEGDEEM[Oxidation (M)]HC[Carbamidomethyl (C)]SDDGFWSK	3
Oxidation	P01861	Immunoglobulin heavy constant gamma 4	_EPQVYTLPPSQEEM[Oxidation (M)]TK	1
Oxidation	P00747	Plasminogen	_M[Oxidation (M)]RDVVLFEKK	1
Oxidation	P04114	Apolipoprotein B-100	_SGVQM[Oxidation (M)]NTNFFHESGLEAHVALK	1
Oxidation	P01011	Alpha-1-antichymotrypsin	_WEM[Oxidation (M)]PFDPQDTHQSR	1
Oxidation	P43652	Afamin	_DM[Oxidation (M)]VEYKDR	1
Oxidation	P02760	Protein AMBP	_KEDSC[Carbamidomethyl (C)]QLGYSAGPC[Carbamidomethyl (C)]MGM[Oxidation (M)]TSR	3
Oxidation	P00450	Ceruloplasmin	_MFTTAPDQVDKEDEDFQESNKMHSMNGFM[Oxidation (M)]YGNQPGLTMC[Carbamidomethyl (C)]K	2
Oxidation	P00450	Ceruloplasmin	_M[Oxidation (M)]HSMNGFMYGNQPGLTMC[Carbamidomethyl (C)]K	2
Oxidation	P01706	Immunoglobulin lambda variable 2-11	_LM[Oxidation (M)]IYDVSKRPSGVPDR	1
Oxidation	P01042	Kininogen-1	_IYPTVNC[Carbamidomethyl (C)]QPLGMISLM[Oxidation (M)]K	2
Oxidation	P00450	Ceruloplasmin	_MHSMNGFMYGNQPGLTM[Oxidation (M)]C[Carbamidomethyl (C)]K	2
Oxidation	A0A087X1J7;P22352	Glutathione peroxidase;Glutathione peroxidase 3	_M[Oxidation (M)]DILSYMR	1
Oxidation	A0A0G2JMB2	Immunoglobulin heavy constant alpha 2 (Fragment)	_VAAEDWKKGDTFSC[Carbamidomethyl (C)]M[Oxidation (M)]VGHEALPLAFTQK	2
Oxidation	P27169	Serum paraoxonase/arylesterase 1	_FDVSSFNPHGISTFTDEDNAM[Oxidation (M)]YLLVVNHPDAK	1
Oxidation	P01011	Alpha-1-antichymotrypsin	_TIVRFNRPFLM[Oxidation (M)]IIVPTDTQNIFFMSK	1
Oxidation	Q06033;Q06033-2	Inter-alpha-trypsin inhibitor heavy chain H3;Isoform 2 of Inter-alpha-trypsin inhibitor heavy chain H3	_GM[Oxidation (M)]TNINDGLLR	1
Oxidation	P01023	Alpha-2-macroglobulin	_TTVM[Oxidation (M)]VKNEDSLVFVQTDK	1
Oxidation	E9PFZ2	Ceruloplasmin	_M[Oxidation (M)]YYSAVEPTKDIFTGLIGPM[Oxidation (M)]K	2
Oxidation	P01019	Angiotensinogen	_FM[Oxidation (M)]QAVTGWK	1
Oxidation	H0YAC1;P03952	Plasma kallikrein (Fragment);Plasma kallikrein	_VLSNVESGFSLKPC[Carbamidomethyl (C)]ALSEIGC[Carbamidomethyl (C)]HM[Oxidation (M)]NIFQHLAFSDVDVAR	3
Oxidation	P04114	Apolipoprotein B-100	_TLADLTLLDSPIKVPLLLSEPINIIDALEM[Oxidation (M)]R	1
Oxidation	P02760	Protein AMBP	_VVAQGVGIPEDSIFTM[Oxidation (M)]ADRGEC[Carbamidomethyl (C)]VPGEQEPEPILIPR	2
Oxidation	P01009	Alpha-1-antitrypsin	_AVLTIDEKGTEAAGAM[Oxidation (M)]FLEAIPMSIPPEVK	1
Oxidation	P01024	Complement C3	_NNNEKDM[Oxidation (M)]ALTAFVLISLQEAKDIC[Carbamidomethyl (C)]EEQVNSLPGSITK	2
Oxidation	P43652	Afamin	_M[Oxidation (M)]VQQEC[Carbamidomethyl (C)]K	2
Oxidation	P0C0L5	Complement C4-B	_GC[Carbamidomethyl (C)]GEQTM[Oxidation (M)]IYLAPTLAASR	2
Oxidation	P01009	Alpha-1-antitrypsin	_FNKPFVFLM[Oxidation (M)]IEQNTK	1
Oxidation	Q06033;Q06033-2	Inter-alpha-trypsin inhibitor heavy chain H3;Isoform 2 of Inter-alpha-trypsin inhibitor heavy chain H3	_SMEDKGM[Oxidation (M)]TNINDGLLR	1
Oxidation	P04114	Apolipoprotein B-100	_TGISPLALIKGM[Oxidation (M)]TRPLSTLISSSQSC[Carbamidomethyl (C)]QYTLDAK	2
Oxidation	P01857	Immunoglobulin heavy constant gamma 1	_SRWQQGNVFSC[Carbamidomethyl (C)]SVM[Oxidation (M)]HEALHNHYTQK	2
Oxidation	D6R934;P02746	Complement C1q subcomponent subunit B	_FDHVITNM[Oxidation (M)]NNNYEPR	1
Oxidation	P07357	Complement component C8 alpha chain	_M[Oxidation (M)]ESLGITSR	1
Oxidation	P08603	Complement factor H	_HGGLYHENM[Oxidation (M)]R	1
Oxidation	P05090	Apolipoprotein D	_M[Oxidation (M)]TVTDQVNC[Carbamidomethyl (C)]PK	2
Oxidation	P01023	Alpha-2-macroglobulin	_M[Oxidation (M)]C[Carbamidomethyl (C)]PQLQQYEM[Oxidation (M)]HGPEGLR	3
Oxidation	P01704	Immunoglobulin lambda variable 2-14	_LM[Oxidation (M)]IYEVSNRPSGVSNR	1
Oxidation	P01024	Complement C3	_KC[Carbamidomethyl (C)]C[Carbamidomethyl (C)]EDGMRENPM[Oxidation (M)]R	3
Oxidation	P13671	Complement component C6	_KM[Oxidation (M)]EILHPGK	1
Oxidation	P00450	Ceruloplasmin	_M[Oxidation (M)]YYSAVDPTKDIFTGLIGPMK	1
Oxidation	P00450	Ceruloplasmin	_GVYSSDVFDIFPGTYQTLEM[Oxidation (M)]FPR	1
Oxidation	P00738	Haptoglobin	_VM[Oxidation (M)]PIC[Carbamidomethyl (C)]LPSKDYAEVGR	2
Oxidation	P04004	Vitronectin	_DWHGVPGQVDAAM[Oxidation (M)]AGR	1
Oxidation	P04003	C4b-binding protein alpha chain	_M[Oxidation (M)]ALEVYK	1
Oxidation	B4E1Z4	cDNA FLJ55673, highly similar to Complement factor B (EC 3.4.21.47)	_HVIILMTDGLHNM[Oxidation (M)]GGDPITVIDEIRDLLYIGKDR	1
Oxidation	P01024	Complement C3	_HLIVTPSGC[Carbamidomethyl (C)]GEQNMIGM[Oxidation (M)]TPTVIAVHYLDETEQWEKFGLEK	2
Oxidation	P10643	Complement component C7	_VTVSC[Carbamidomethyl (C)]SGGM[Oxidation (M)]SLEGPSAFLC[Carbamidomethyl (C)]GSSLK	3
Oxidation	E7ETH0;G3XAM2;P05156	Complement factor I	_ADSPM[Oxidation (M)]DDFFQC[Carbamidomethyl (C)]VNGK	2
Oxidation	P01860	Immunoglobulin heavy constant gamma 3	_GFYPSDIAVEWESSGQPENNYNTTPPM[Oxidation (M)]LDSDGSFFLYSK	1
Oxidation	P19827	Inter-alpha-trypsin inhibitor heavy chain H1	_GM[Oxidation (M)]ADQDGLKPTIDKPSEDSPPLEM[Oxidation (M)]LGPR	2
Oxidation	P25311	Zinc-alpha-2-glycoprotein	_AREDIFM[Oxidation (M)]ETLK	1
Oxidation	Q06033;Q06033-2	Inter-alpha-trypsin inhibitor heavy chain H3;Isoform 2 of Inter-alpha-trypsin inhibitor heavy chain H3	_YHFVTPLTSM[Oxidation (M)]VVTKPEDNEDER	1
Oxidation	P01860	Immunoglobulin heavy constant gamma 3	_GQPREPQVYTLPPSREEM[Oxidation (M)]TK	1
Oxidation	P01024	Complement C3	_C[Carbamidomethyl (C)]C[Carbamidomethyl (C)]EDGM[Oxidation (M)]RENPMR	3
Oxidation	P05543	Thyroxine-binding globulin	_M[Oxidation (M)]GIQHAYSENADFSGLTEDNGLK	1
Oxidation	P01023	Alpha-2-macroglobulin	_VVSM[Oxidation (M)]DENFHPLNELIPLVYIQDPKGNR	1
Oxidation	P02753;Q5VY30	Retinol-binding protein 4;Retinol binding protein 4, plasma, isoform CRA_b	_FSGTWYAM[Oxidation (M)]AK	1
Oxidation	P01011	Alpha-1-antichymotrypsin	_WVM[Oxidation (M)]VPMMSLHHLTIPYFR	1
Oxidation	P01871	Immunoglobulin heavy constant mu	_STGKPTLYNVSLVM[Oxidation (M)]SDTAGTC[Carbamidomethyl (C)]Y	2
Oxidation	P05155;P05155-3	Plasma protease C1 inhibitor;Isoform 3 of Plasma protease C1 inhibitor	_IKVTTSQDM[Oxidation (M)]LSIMEK	1
Oxidation	P04114	Apolipoprotein B-100	_NM[Oxidation (M)]EVSVATTTK	1
Oxidation	P07357	Complement component C8 alpha chain	_AM[Oxidation (M)]AVEDIISR	1
Oxidation	P02763	Alpha-1-acid glycoprotein 1	_TYM[Oxidation (M)]LAFDVNDEK	1
Oxidation	P00742	Coagulation factor X	_M[Oxidation (M)]LEVPYVDR	1
Oxidation	P23083	Immunoglobulin heavy variable 1-2	_DTSISTAYM[Oxidation (M)]ELSR	1
Oxidation	B4DPQ0	Complement C1r subcomponent	_M[Oxidation (M)]GNFPWQVFTNIHGR	1
Oxidation	A0A075B7D0	Immunoglobulin heavy variable 1/OR15-1 (non-functional) (Fragment)	_QAPGQELGWM[Oxidation (M)]GR	1
Oxidation	Q06033;Q06033-2	Inter-alpha-trypsin inhibitor heavy chain H3;Isoform 2 of Inter-alpha-trypsin inhibitor heavy chain H3	_NAIGGKFPLYNLGFGNNLNYNFLENM[Oxidation (M)]ALENHGFAR	1
Oxidation	P01009	Alpha-1-antitrypsin	_AVLTIDEKGTEAAGAM[Oxidation (M)]FLEAIPM[Oxidation (M)]SIPPEVK	2
Oxidation	P06396	Gelsolin	_VPFDAATLHTSTAMAAQHGM[Oxidation (M)]DDDGTGQK	1
Oxidation	P01024	Complement C3	_LESEETM[Oxidation (M)]VLEAHDAQGDVPVTVTVHDFPGK	1
Oxidation	P01008	Antithrombin-III	_VAEGTQVLELPFKGDDITM[Oxidation (M)]VLILPKPEK	1
Oxidation	P0C0L5	Complement C4-B	_KKEVYM[Oxidation (M)]PSSIFQDDFVIPDISEPGTWK	1
Oxidation	P08519	Apolipoprotein(a)	_TPEYYPNAGLIM[Oxidation (M)]NYC[Carbamidomethyl (C)]R	2
Oxidation	P00450	Ceruloplasmin	_DTANLFPQTSLTLHM[Oxidation (M)]WPDTEGTFNVEC[Carbamidomethyl (C)]LTTDHYTGGM[Oxidation (M)]K	3
Oxidation	P06396	Gelsolin	_EPAHLMSLFGGKPM[Oxidation (M)]IIYK	1
Oxidation	P01009	Alpha-1-antitrypsin	_GTEAAGAM[Oxidation (M)]FLEAIPM[Oxidation (M)]SIPPEVK	2
Oxidation	P01860	Immunoglobulin heavy constant gamma 3	_EEM[Oxidation (M)]TKNQVSLTC[Carbamidomethyl (C)]LVK	2
Oxidation	P01024	Complement C3	_SYTVAIAGYALAQM[Oxidation (M)]GR	1
Oxidation	P02774;P02774-3	Vitamin D-binding protein;Isoform 3 of Vitamin D-binding protein	_TAMDVFVC[Carbamidomethyl (C)]TYFM[Oxidation (M)]PAAQLPELPDVELPTNK	2
Oxidation	Q96PD5	N-acetylmuramoyl-L-alanine amidase	_ASLLTM[Oxidation (M)]AFLNGALDGVILGDYLSR	1
Oxidation	P01009	Alpha-1-antitrypsin	_GTEAAGAM[Oxidation (M)]FLEAIPMSIPPEVK	1
Oxidation	P00450	Ceruloplasmin	_DIFTGLIGPM[Oxidation (M)]K	1
Oxidation	P00450	Ceruloplasmin	_VYPGEQYTYM[Oxidation (M)]LLATEEQSPGEGDGNC[Carbamidomethyl (C)]VTR	2
Oxidation	P02787	Serotransferrin	_SM[Oxidation (M)]GGKEDLIWELLNQAQEHFGKDK	1
Oxidation	D6R934;P02746	Complement C1q subcomponent subunit B	_GNLC[Carbamidomethyl (C)]VNLM[Oxidation (M)]R	2
Oxidation	P04114	Apolipoprotein B-100	_NKYGM[Oxidation (M)]VAQVTQTLK	1
Oxidation	P19823	Inter-alpha-trypsin inhibitor heavy chain H2	_M[Oxidation (M)]LADAPPQDPSC[Carbamidomethyl (C)]C[Carbamidomethyl (C)]SGALYYGSK	3
Oxidation	P01706	Immunoglobulin lambda variable 2-11	_LM[Oxidation (M)]IYDVSK	1
Oxidation	Q14624	Inter-alpha-trypsin inhibitor heavy chain H4	_NM[Oxidation (M)]EQFQVSVSVAPNAK	1
Oxidation	P0C0L5	Complement C4-B	_MRPSTDTITVM[Oxidation (M)]VENSHGLR	1
Oxidation	P02787	Serotransferrin	_LC[Carbamidomethyl (C)]M[Oxidation (M)]GSGLNLC[Carbamidomethyl (C)]EPNNK	3
Oxidation	P01011	Alpha-1-antichymotrypsin	_TIVRFNRPFLM[Oxidation (M)]IIVPTDTQNIFFM[Oxidation (M)]SK	2
Oxidation	P04114	Apolipoprotein B-100	_C[Carbamidomethyl (C)]VQSTKPSLM[Oxidation (M)]IQK	2
Oxidation	P08571	Monocyte differentiation antigen CD14	_GLM[Oxidation (M)]AALC[Carbamidomethyl (C)]PHKFPAIQNLALR	2
Oxidation	P07996	Thrombospondin-1	_M[Oxidation (M)]ENAELDVPIQSVFTR	1
Oxidation	P05155;P05155-3	Plasma protease C1 inhibitor;Isoform 3 of Plasma protease C1 inhibitor	_NSVIKVPMM[Oxidation (M)]NSK	1
Oxidation	B4DPQ0	Complement C1r subcomponent	_EFM[Oxidation (M)]SQGNK	1
Oxidation	P01023	Alpha-2-macroglobulin	_AFQPFFVELTM[Oxidation (M)]PYSVIR	1
Oxidation	P04114	Apolipoprotein B-100	_TIDQM[Oxidation (M)]LNSELQWPVPDIYLR	1
Oxidation	P04114	Apolipoprotein B-100	_LSNDMMGSYAEM[Oxidation (M)]K	1
Oxidation	O95445	Apolipoprotein M	_M[Oxidation (M)]KDGLC[Carbamidomethyl (C)]VPR	2
Oxidation	P15169	Carboxypeptidase N catalytic chain	_IHILPSM[Oxidation (M)]NPDGYEVAAAQGPNKPGYLVGR	1
Oxidation	P01031	Complement C5	_RM[Oxidation (M)]PITYDNGFLFIHTDKPVYTPDQSVK	1
Oxidation	P07357	Complement component C8 alpha chain	_RALDQYLM[Oxidation (M)]EFNAC[Carbamidomethyl (C)]R	2
Oxidation	A0A0J9YX35	Immunoglobulin heavy variable 3-64D	_NTLYLQM[Oxidation (M)]SSLR	1
Oxidation	Q14624	Inter-alpha-trypsin inhibitor heavy chain H4	_NVVFVIDKSGSM[Oxidation (M)]SGR	1
Oxidation	P00450	Ceruloplasmin	_M[Oxidation (M)]FTTAPDQVDKEDEDFQESNK	1
Oxidation	P04217	Alpha-1B-glycoprotein	_SLPAPWLSM[Oxidation (M)]APVSWITPGLK	1
Oxidation	D6R934;P02746	Complement C1q subcomponent subunit B	_NSLLGMEGANSIFSGFLLFPDM[Oxidation (M)]EA	1
Oxidation	E7ER44;P02788	Lactotransferrin	_SC[Carbamidomethyl (C)]HLAM[Oxidation (M)]APNHAVVSR	2
Oxidation	P02787	Serotransferrin	_IM[Oxidation (M)]NGEADAMSLDGGFVYIAGK	1
Oxidation	P01023	Alpha-2-macroglobulin	_TGTHGLLVKQEDM[Oxidation (M)]K	1
Oxidation	P05155;P05155-3	Plasma protease C1 inhibitor;Isoform 3 of Plasma protease C1 inhibitor	_VPMM[Oxidation (M)]NSK	1
Oxidation	O43866	CD5 antigen-like	_KPIWLSQM[Oxidation (M)]SC[Carbamidomethyl (C)]SGR	2
Oxidation	P01023	Alpha-2-macroglobulin	_QEDM[Oxidation (M)]KGHFSISIPVKSDIAPVAR	1
Oxidation	P01024	Complement C3	_YFKPGMPFDLM[Oxidation (M)]VFVTNPDGSPAYR	1
Oxidation	P05155;P05155-3	Plasma protease C1 inhibitor;Isoform 3 of Plasma protease C1 inhibitor	_M[Oxidation (M)]EPFHFK	1
Oxidation	P01009	Alpha-1-antitrypsin	_RLGM[Oxidation (M)]FNIQHC[Carbamidomethyl (C)]K	2
Oxidation	P02774;P02774-3	Vitamin D-binding protein;Isoform 3 of Vitamin D-binding protein	_VM[Oxidation (M)]DKYTFELSR	1
Oxidation	P60709	Actin, cytoplasmic 1	_HQGVMVGM[Oxidation (M)]GQK	1
Oxidation	P02647	Apolipoprotein A-I	_ETEGLRQEM[Oxidation (M)]SKDLEEVK	1
Oxidation	P04114	Apolipoprotein B-100	_QTEATM[Oxidation (M)]TFK	1
Oxidation	P04114	Apolipoprotein B-100	_LLLM[Oxidation (M)]GAR	1
Oxidation	P04114	Apolipoprotein B-100	_ATLELSPWQM[Oxidation (M)]SALVQVHASQPSSFHDFPDLGQEVALNANTK	1
Oxidation	O43866	CD5 antigen-like	_HAYGRKPIWLSQM[Oxidation (M)]SC[Carbamidomethyl (C)]SGR	2
Oxidation	P00740	Coagulation factor IX	_FTIYNNM[Oxidation (M)]FC[Carbamidomethyl (C)]AGFHEGGR	2
Oxidation	P00488	Coagulation factor XIII A chain	_LIASM[Oxidation (M)]SSDSLR	1
Oxidation	P01024	Complement C3	_LMNIFLKDSITTWEILAVSM[Oxidation (M)]SDKK	1
Oxidation	P01024	Complement C3	_YRGDQDATM[Oxidation (M)]SILDISMMTGFAPDTDDLK	1
Oxidation	P01031	Complement C5	_YGM[Oxidation (M)]WTIK	1
Oxidation	Q92496;Q92496-2	Complement factor H-related protein 4;Isoform 2 of Complement factor H-related protein 4	_FC[Carbamidomethyl (C)]DM[Oxidation (M)]PVFENSR	2
Oxidation	A0A087X1J7;P22352	Glutathione peroxidase;Glutathione peroxidase 3	_FLVGPDGIPIM[Oxidation (M)]R	1
Oxidation	P01861	Immunoglobulin heavy constant gamma 4	_GQPREPQVYTLPPSQEEM[Oxidation (M)]TKNQVSLTC[Carbamidomethyl (C)]LVK	2
Oxidation	A0A075B7E8	Immunoglobulin heavy variable 3/OR16-13 (non-functional) (Fragment)	_DNAKNTLYLQM[Oxidation (M)]NSLR	1
Oxidation	Q06033;Q06033-2	Inter-alpha-trypsin inhibitor heavy chain H3;Isoform 2 of Inter-alpha-trypsin inhibitor heavy chain H3	_SM[Oxidation (M)]EDKGM[Oxidation (M)]TNINDGLLR	2
Oxidation	Q96PD5	N-acetylmuramoyl-L-alanine amidase	_AKSPPTM[Oxidation (M)]VDSLLAVTLAGNLGLTFLR	1
Oxidation	P62937	Peptidyl-prolyl cis-trans isomerase A	_IIPGFM[Oxidation (M)]C[Carbamidomethyl (C)]QGGDFTR	2
Oxidation	P05155;P05155-3	Plasma protease C1 inhibitor;Isoform 3 of Plasma protease C1 inhibitor	_LEDM[Oxidation (M)]EQALSPSVFK	1
Oxidation	P20742	Pregnancy zone protein	_MLQITNTGFEM[Oxidation (M)]K	1
Oxidation	A0A0J9YY99	Uncharacterized protein (Fragment)	_DNSKNTLYLQM[Oxidation (M)]NSLRAEDTAVYYC[Carbamidomethyl (C)]AK	2
Oxidation	P04004	Vitronectin	_M[Oxidation (M)]DWLVPATC[Carbamidomethyl (C)]EPIQSVFFFSGDKYYR	2
Oxidation	P08697	Alpha-2-antiplasmin	_LYLKHQM[Oxidation (M)]DLVATLSQLGLQELFQAPDLR	1
Oxidation	P00734	Prothrombin	_IVEGSDAEIGM[Oxidation (M)]SPWQVMLFR	1
Oxidation	P01042	Kininogen-1	_KIYPTVNC[Carbamidomethyl (C)]QPLGMISLM[Oxidation (M)]K	2
Oxidation	P00450	Ceruloplasmin	_TPGIWLLHC[Carbamidomethyl (C)]HVTDHIHAGM[Oxidation (M)]ETTYTVLQNEDTK	2
Oxidation	P08519	Apolipoprotein(a)	_TC[Carbamidomethyl (C)]QAWSSM[Oxidation (M)]TPHSHSR	2
Oxidation	P01011	Alpha-1-antichymotrypsin	_MEEVEAM[Oxidation (M)]LLPETLKR	1
Oxidation	P01011	Alpha-1-antichymotrypsin	_WVMVPM[Oxidation (M)]MSLHHLTIPYFR	1
Oxidation	P05155;P05155-3	Plasma protease C1 inhibitor;Isoform 3 of Plasma protease C1 inhibitor	_VTTSQDMLSIM[Oxidation (M)]EK	1
Oxidation	P04004	Vitronectin	_IYISGM[Oxidation (M)]APRPSLAK	1
Oxidation	Q14624	Inter-alpha-trypsin inhibitor heavy chain H4	_ANTVQEATFQM[Oxidation (M)]ELPKK	1
Oxidation	P51884	Lumican	_SVPM[Oxidation (M)]VPPGIK	1
Oxidation	P0C0L5	Complement C4-B	_VFEAM[Oxidation (M)]NSYDLGC[Carbamidomethyl (C)]GPGGGDSALQVFQAAGLAFSDGDQWTLSR	2
Oxidation	P09871	Complement C1s subcomponent	_YHGDPM[Oxidation (M)]PC[Carbamidomethyl (C)]PKEDTPNSVWEPAK	2
Oxidation	P01860	Immunoglobulin heavy constant gamma 3	_EPQVYTLPPSREEM[Oxidation (M)]TKNQVSLTC[Carbamidomethyl (C)]LVK	2
Oxidation	P00747	Plasminogen	_TPENYPNAGLTM[Oxidation (M)]NYC[Carbamidomethyl (C)]R	2
Oxidation	P08603	Complement factor H	_SPPEISHGVVAHM[Oxidation (M)]SDSYQYGEEVTYK	1
Oxidation	P04114	Apolipoprotein B-100	_M[Oxidation (M)]NFKQELNGNTK	1
Oxidation	P09871	Complement C1s subcomponent	_M[Oxidation (M)]GPTVSPIC[Carbamidomethyl (C)]LPGTSSDYNLMDGDLGLISGWGR	2
Oxidation	P19827	Inter-alpha-trypsin inhibitor heavy chain H1	_GHM[Oxidation (M)]LENHVER	1
Oxidation	P01024	Complement C3	_ILLQGTPVAQM[Oxidation (M)]TEDAVDAER	1
Oxidation	P02790	Hemopexin	_DVRDYFM[Oxidation (M)]PC[Carbamidomethyl (C)]PGR	2
Oxidation	P05090	Apolipoprotein D	_KM[Oxidation (M)]TVTDQVNC[Carbamidomethyl (C)]PK	2
Oxidation	P08603	Complement factor H	_TDC[Carbamidomethyl (C)]LSLPSFENAIPM[Oxidation (M)]GEKK	2
Oxidation	P02751;P02751-15;P02751-3;P02751-7	Fibronectin;Isoform 15 of Fibronectin;Isoform 3 of Fibronectin;Isoform 7 of Fibronectin	_TEIDKPSQM[Oxidation (M)]QVTDVQDNSISVK	1
Oxidation	P00747	Plasminogen	_TM[Oxidation (M)]SGLEC[Carbamidomethyl (C)]QAWDSQSPHAHGYIPSKFPNK	2
Oxidation	P01023	Alpha-2-macroglobulin	_HNVYINGITYTPVSSTNEKDM[Oxidation (M)]YSFLEDMGLK	1
Oxidation	P01743	Immunoglobulin heavy variable 1-46	_DTSTSTVYM[Oxidation (M)]ELSSLR	1
Oxidation	P27169	Serum paraoxonase/arylesterase 1	_ILLM[Oxidation (M)]DLNEEDPTVLELGITGSK	1
Oxidation	A0A075B6Q5	Immunoglobulin heavy variable 3-64	_NTLYLQM[Oxidation (M)]GSLR	1
Oxidation	Q06033;Q06033-2	Inter-alpha-trypsin inhibitor heavy chain H3;Isoform 2 of Inter-alpha-trypsin inhibitor heavy chain H3	_LVDEDM[Oxidation (M)]NSFK	1
Oxidation	Q96PD5	N-acetylmuramoyl-L-alanine amidase	_VINLPLDSM[Oxidation (M)]AAPWETGDTFPDVVAIAPDVR	1
Oxidation	Q14624	Inter-alpha-trypsin inhibitor heavy chain H4	_M[Oxidation (M)]NFRPGVLSSR	1
Oxidation	P01009	Alpha-1-antitrypsin	_LSSWVLLM[Oxidation (M)]K	1
Oxidation	P01024	Complement C3	_YRGDQDATMSILDISM[Oxidation (M)]MTGFAPDTDDLKQLANGVDR	1
Oxidation	P01023	Alpha-2-macroglobulin	_DM[Oxidation (M)]YSFLEDMGLK	1
Oxidation	P0C0L5	Complement C4-B	_M[Oxidation (M)]RPSTDTITVMVENSHGLR	1
Oxidation	P01011	Alpha-1-antichymotrypsin	_M[Oxidation (M)]EEVEAMLLPETLKR	1
Oxidation	A0A0C4DH34	Immunoglobulin heavy variable 4-28	_SRVTM[Oxidation (M)]SVDTSK	1
Oxidation	P01705	Immunoglobulin lambda variable 2-23	_LM[Oxidation (M)]IYEGSK	1
Oxidation	P05164;P05164-2;P05164-3	Myeloperoxidase;Isoform H14 of Myeloperoxidase;Isoform H7 of Myeloperoxidase	_NNIFM[Oxidation (M)]SNSYPR	1
Oxidation	P06396	Gelsolin	_AM[Oxidation (M)]AELAA	1
Oxidation	P02768	Serum albumin	_M[Oxidation (M)]PC[Carbamidomethyl (C)]AEDYLSVVLNQLC[Carbamidomethyl (C)]VLHEKTPVSDR	3
Oxidation	P02765	Alpha-2-HS-glycoprotein	_HTFM[Oxidation (M)]GVVSLGSPSGEVSHPR	1
Oxidation	P01023	Alpha-2-macroglobulin	_MC[Carbamidomethyl (C)]PQLQQYEM[Oxidation (M)]HGPEGLR	2
Oxidation	P01023	Alpha-2-macroglobulin	_M[Oxidation (M)]VSGFIPLKPTVK	1
Oxidation	P01023	Alpha-2-macroglobulin	_SASNM[Oxidation (M)]AIVDVK	1
Oxidation	P01024	Complement C3	_TM[Oxidation (M)]QALPYSTVGNSNNYLHLSVLR	1
Oxidation	P01024	Complement C3	_SGQSEDRQPVPGQQM[Oxidation (M)]TLK	1
Oxidation	P01024	Complement C3	_VQLSNDFDEYIM[Oxidation (M)]AIEQTIK	1
Oxidation	P01857	Immunoglobulin heavy constant gamma 1	_DTLM[Oxidation (M)]ISR	1
Oxidation	P01860	Immunoglobulin heavy constant gamma 3	_EPQVYTLPPSREEM[Oxidation (M)]TK	1
Oxidation	P01871	Immunoglobulin heavy constant mu	_YVTSAPM[Oxidation (M)]PEPQAPGR	1
Oxidation	P02787	Serotransferrin	_DSGFQM[Oxidation (M)]NQLR	1
Oxidation	P02787	Serotransferrin	_LC[Carbamidomethyl (C)]M[Oxidation (M)]GSGLNLC[Carbamidomethyl (C)]EPNNKEGYYGYTGAFR	3
Oxidation	P02787	Serotransferrin	_M[Oxidation (M)]YLGYEYVTAIR	1
Oxidation	P02768	Serum albumin	_RM[Oxidation (M)]PC[Carbamidomethyl (C)]AEDYLSVVLNQLC[Carbamidomethyl (C)]VLHEKTPVSDR	3
Oxidation	P02768	Serum albumin	_SHC[Carbamidomethyl (C)]IAEVENDEM[Oxidation (M)]PADLPSLAADFVESKDVC[Carbamidomethyl (C)]K	3
Oxidation	P02768	Serum albumin	_LVRPEVDVM[Oxidation (M)]C[Carbamidomethyl (C)]TAFHDNEETFLKK	2
Oxidation	P02768	Serum albumin	_EQLKAVM[Oxidation (M)]DDFAAFVEK	1
Oxidation	P02768	Serum albumin	_RM[Oxidation (M)]PC[Carbamidomethyl (C)]AEDYLSVVLNQLC[Carbamidomethyl (C)]VLHEK	3
Oxidation	P02768	Serum albumin	_SHC[Carbamidomethyl (C)]IAEVENDEM[Oxidation (M)]PADLPSLAADFVESK	2
Oxidation	P02768	Serum albumin	_DVFLGM[Oxidation (M)]FLYEYAR	1
Oxidation	P02768	Serum albumin	_AVM[Oxidation (M)]DDFAAFVEK	1
Phospho	P02671	Fibrinogen alpha chain	_TVIGPDGHKEVTKEVVTSEDGSDC[Carbamidomethyl (C)]PEAMDLGT[Phospho (STY)]LSGIGTLDGFR	2
Phospho	P00450	Ceruloplasmin	_FNKNNEGT[Phospho (STY)]YYSPNYNPQSR	1
Phospho	P69905	Hemoglobin subunit alpha	_VADALT[Phospho (STY)]NAVAHVDDM[Oxidation (M)]PNALS[Phospho (STY)]ALSDLHAHK	3
Phospho	O14791;O14791-2	Apolipoprotein L1;Isoform 2 of Apolipoprotein L1	_VTEPIS[Phospho (STY)]AESGEQVER	1
Phospho	P02768	Serum albumin	_TC[Carbamidomethyl (C)]VADES[Phospho (STY)]AENC[Carbamidomethyl (C)]DK	3
Phospho	P02765	Alpha-2-HS-glycoprotein	_HTFM[Oxidation (M)]GVVSLGSPS[Phospho (STY)]GEVSHPR	2
Phospho	P02765	Alpha-2-HS-glycoprotein	_C[Carbamidomethyl (C)]DSSPDS[Phospho (STY)]AEDVR	2
Phospho	O14791;O14791-2	Apolipoprotein L1;Isoform 2 of Apolipoprotein L1	_VTEPISAES[Phospho (STY)]GEQVERVNEPSILEMSR	1
Phospho	P02671	Fibrinogen alpha chain	_MADEAGS[Phospho (STY)]EADHEGTHSTK	1
Phospho	P00450	Ceruloplasmin	_FNKNNEGTYY[Phospho (STY)]SPNYNPQSR	1
Phospho	P69905	Hemoglobin subunit alpha	_VLS[Phospho (STY)]PADKTNVK	1
Phospho	P05546	Heparin cofactor 2	_ENTVT[Phospho (STY)]NDWIPEGEEDDDYLDLEK	1
Phospho	P01008	Antithrombin-III	_ATEDEGS[Phospho (STY)]EQKIPEATNR	1
Phospho	P01008	Antithrombin-III	_KATEDEGS[Phospho (STY)]EQKIPEATNR	1
Phospho	P01860	Immunoglobulin heavy constant gamma 3	_GFYPSDIAVEWESSGQPENNY[Phospho (STY)]NTTPPMLDSDGSFFLYSK	1
Phospho	P01042	Kininogen-1	_ETTC[Carbamidomethyl (C)]SKES[Phospho (STY)]NEELTESC[Carbamidomethyl (C)]ETK	3
Phospho	O14791;O14791-2	Apolipoprotein L1;Isoform 2 of Apolipoprotein L1	_VTEPISAES[Phospho (STY)]GEQVER	1
Phospho	P00450	Ceruloplasmin	_IYHSHIDAPKDIAS[Phospho (STY)]GLIGPLIIC[Carbamidomethyl (C)]KK	2
Phospho	P01008	Antithrombin-III	_DDLY[Phospho (STY)]VS[Phospho (STY)]DAFHKAFLEVNEEGS[Phospho (STY)]EAAASTAVVIAGR	3
Phospho	P01009	Alpha-1-antitrypsin	_VFSNGADLS[Phospho (STY)]GVTEEAPLK	1
Phospho	P02768	Serum albumin	_TC[Carbamidomethyl (C)]VADES[Phospho (STY)]AENC[Carbamidomethyl (C)]DKSLHTLFGDK	3
Phospho	P08697	Alpha-2-antiplasmin	_LVPPMEEDY[Phospho (STY)]PQFGSPK	1
Phospho	P00747	Plasminogen	_AFQY[Phospho (STY)]HSKEQQC[Carbamidomethyl (C)]VIMAENRK	2
Phospho	P01024	Complement C3	_KHY[Phospho (STY)]LMWGLSS[Phospho (STY)]DFWGEKPNLSYIIGK	2
Phospho	P02671	Fibrinogen alpha chain	_PGSTGTWNPGSS[Phospho (STY)]ER	1
Phospho	P02765	Alpha-2-HS-glycoprotein	_HTFMGVVSLGS[Phospho (STY)]PSGEVSHPR	1
Phospho	P02768	Serum albumin	_S[Phospho (STY)]HC[Carbamidomethyl (C)]IAEVENDEMPADLPSLAADFVESKDVC[Carbamidomethyl (C)]K	3
Phospho	P02768	Serum albumin	_AT[Phospho (STY)]KEQLKAVMDDFAAFVEK	1
Phospho	P19823	Inter-alpha-trypsin inhibitor heavy chain H2	_S[Phospho (STY)]LPGESEEMMEEVDQVTLYSYK	1
Phospho	P02652;V9GYM3	Apolipoprotein A-II	_SYFEKS[Phospho (STY)]KEQLTPLIK	1
Phospho	P02768	Serum albumin	_S[Phospho (STY)]HC[Carbamidomethyl (C)]IAEVENDEM[Oxidation (M)]PADLPSLAADFVESK	3
Phospho	A0A0A0MT36	Immunoglobulin kappa variable 6D-21	_PDQS[Phospho (STY)]PKLLIKY[Phospho (STY)]ASQSISGVPSR	2
Phospho	P01042	Kininogen-1	_ETT[Phospho (STY)]C[Carbamidomethyl (C)]SKESNEELTESC[Carbamidomethyl (C)]ETKK	3
Phospho	P04433	Immunoglobulin kappa variable 3-11	_ASQSVSSY[Phospho (STY)]LAWYQQKPGQAPR	1
Phospho	A0A0G2JRQ6	Uncharacterized protein (Fragment)	_ASQGISNS[Phospho (STY)]LAWYQQKPGKAPK	1
Phospho	P19823	Inter-alpha-trypsin inhibitor heavy chain H2	_SLPGES[Phospho (STY)]EEMM[Oxidation (M)]EEVDQVTLYSYK	2
Phospho	P02765	Alpha-2-HS-glycoprotein	_HTFMGVVSLGSPS[Phospho (STY)]GEVSHPR	1
Phospho	P02652;V9GYM3	Apolipoprotein A-II	_EPC[Carbamidomethyl (C)]VES[Phospho (STY)]LVSQYFQTVTDYGKDLMEK	2
Phospho	P01042	Kininogen-1	_ETTC[Carbamidomethyl (C)]SKES[Phospho (STY)]NEELTESC[Carbamidomethyl (C)]ETKK	3
Phospho	P02768	Serum albumin	_TC[Carbamidomethyl (C)]VADESAENC[Carbamidomethyl (C)]DKS[Phospho (STY)]LHTLFGDK	3
Phospho	P0DJI8	Serum amyloid A-1 protein	_RGPGGVWAAEAIS[Phospho (STY)]DAR	1
Phospho	P06702	Protein S100-A9	_MHEGDEGPGHHHKPGLGEGT[Phospho (STY)]P	1
Phospho	P19827	Inter-alpha-trypsin inhibitor heavy chain H1	_T[Phospho (STY)]FVLS[Phospho (STY)]ALQPSPTHSSSNTQR	2
Phospho	P02768	Serum albumin	_HPDY[Phospho (STY)]S[Phospho (STY)]VVLLLRLAKTYETTLEK	2
Phospho	P02765	Alpha-2-HS-glycoprotein	_C[Carbamidomethyl (C)]DSSPDS[Phospho (STY)]AEDVRK	2
Phospho	O14791;O14791-2	Apolipoprotein L1;Isoform 2 of Apolipoprotein L1	_VTEPIS[Phospho (STY)]AESGEQVERVNEPSILEMSR	1
Phospho	P01042	Kininogen-1	_ETT[Phospho (STY)]C[Carbamidomethyl (C)]SKESNEELTESC[Carbamidomethyl (C)]ETK	3
Phospho	P19823	Inter-alpha-trypsin inhibitor heavy chain H2	_SLPGES[Phospho (STY)]EEMMEEVDQVTLYSYK	1
Phospho	P08697	Alpha-2-antiplasmin	_LVPPM[Oxidation (M)]EEDY[Phospho (STY)]PQFGSPK	2
Phospho	P02751;P02751-15;P02751-3;P02751-7	Fibronectin;Isoform 15 of Fibronectin;Isoform 3 of Fibronectin;Isoform 7 of Fibronectin	_TNTNVNC[Carbamidomethyl (C)]PIEC[Carbamidomethyl (C)]FMPLDVQADREDS[Phospho (STY)]RE	3
Phospho	A0A075B6K5	Immunoglobulin lambda variable 3-9	_PSGIPERFS[Phospho (STY)]GS[Phospho (STY)]NSGNTATLTISR	2
Phospho	P02768	Serum albumin	_S[Phospho (STY)]LHTLFGDKLC[Carbamidomethyl (C)]TVATLR	2
Phospho	P01008	Antithrombin-III	_ATEDEGS[Phospho (STY)]EQKIPEATNRR	1
Sulf	P02679	Fibrinogen gamma chain	_QVRPEHPAETEY[Sulfation (Y)]DSLY[Sulfation (Y)]PEDDL	2
Sulf	A0A0C4DH73;P01611	Immunoglobulin kappa variable 1-12;Immunoglobulin kappa variable 1D-12	_ASQGISSWLAWY[Sulfation (Y)]QQKPGKAPK	1
Sulf	P01742	Immunoglobulin heavy variable 1-69	_STSTAY[Sulfation (Y)]MELSSLR	1
Sulf	P02768	Serum albumin	_ETY[Sulfation (Y)]GEMADC[Carbamidomethyl (C)]C[Carbamidomethyl (C)]AK	3
Sulf	P00450	Ceruloplasmin	_NNEGTYYSPNY[Sulfation (Y)]NPQSR	1
Sulf	P02679	Fibrinogen gamma chain	_QVRPEHPAETEYDSLY[Sulfation (Y)]PEDDL	1
Sulf	P00450	Ceruloplasmin	_FNKNNEGTYYSPNY[Sulfation (Y)]NPQSR	1
Sulf	P01834	Immunoglobulin kappa constant	_DSTY[Sulfation (Y)]SLSSTLTLSK	1
Sulf	A0A075B6Q5	Immunoglobulin heavy variable 3-64	_NTLY[Sulfation (Y)]LQM[Oxidation (M)]GSLR	2
Sulf	P00450	Ceruloplasmin	_IY[Sulfation (Y)]HSHIDAPKDIASGLIGPLIIC[Carbamidomethyl (C)]KK	2
Sulf	P06331	Immunoglobulin heavy variable 4-34	_GLEWIGEINHSGSTNY[Sulfation (Y)]NPSLK	1
Sulf	P01861	Immunoglobulin heavy constant gamma 4	_VESKY[Sulfation (Y)]GPPC[Carbamidomethyl (C)]PSC[Carbamidomethyl (C)]PAPEFLGGPSVFLFPPKPK	3
Sulf	P01024	Complement C3	_KHY[Sulfation (Y)]LMWGLSSDFWGEKPNLSY[Sulfation (Y)]IIGK	2
Sulf	A0A0U1RR20;Q92954;Q92954-3;Q92954-6	Proteoglycan 4;Proteoglycan 4;Isoform C of Proteoglycan 4;Isoform F of Proteoglycan 4	_SEDAGGAEGETPHMLLRPHVFMPEVTPDMDY[Sulfation (Y)]LPR	1
Sulf	P00915	Carbonic anhydrase 1	_ASPDWGY[Sulfation (Y)]DDKNGPEQWSK	1
Sulf	P02652;V9GYM3	Apolipoprotein A-II	_EPC[Carbamidomethyl (C)]VESLVSQYFQTVTDY[Sulfation (Y)]GKDLMEK	2
Sulf	P16930	Fumarylacetoacetase	_SFIPVAEDSDFPIHNLPY[Sulfation (Y)]GVFSTR	1
Sulf	P04433	Immunoglobulin kappa variable 3-11	_ASQSVSSYLAWY[Sulfation (Y)]QQKPGQAPR	1
Sulf	A0A0C4DH72	Immunoglobulin kappa variable 1-6	_PGKAPKLLIY[Sulfation (Y)]AASSLQSGVPSR	1
Sulf	P00738	Haptoglobin	_LRTEGDGVY[Sulfation (Y)]TLNDKK	1
Sulf	P19823	Inter-alpha-trypsin inhibitor heavy chain H2	_SLPGESEEMM[Oxidation (M)]EEVDQVTLYSY[Sulfation (Y)]K	2
Sulf	P01834	Immunoglobulin kappa constant	_HKVY[Sulfation (Y)]AC[Carbamidomethyl (C)]EVTHQGLSSPVTK	2
Sulf	P05546	Heparin cofactor 2	_ENTVTNDWIPEGEEDDDY[Sulfation (Y)]LDLEK	1
Sulf	A0A0A0MRJ7;P12259	Coagulation factor V	_KMHDRLEPEDEESDADY[Sulfation (Y)]DY[Sulfation (Y)]QNR	2
Sulf	P08697	Alpha-2-antiplasmin	_LVPPM[Oxidation (M)]EEDY[Sulfation (Y)]PQFGSPK	2
Sulf	P08697	Alpha-2-antiplasmin	_LVPPMEEDY[Sulfation (Y)]PQFGSPK	1
Sulf	P02787	Serotransferrin	_LHDRNTY[Sulfation (Y)]EKY[Sulfation (Y)]LGEEY[Sulfation (Y)]VK	3
Sulf	A0A0B4J2D9;P0DP09	Immunoglobulin kappa variable 1D-13;Immunoglobulin kappa variable 1-13	_LLIY[Sulfation (Y)]DASSLESGVPSR	1

## Sheet: Table_S2
Table S2: Significant difference between Zika and dengue - 272 modifications in 246 peptides from 97 proteins
Spectronaut output														This analysis
Category	UniProt_ID	Gene_ID	Protein_Description	Peptide_Sequence_modified	Peptide_Sequence_unmodified	Number of Mods per peptide	Condition_Numerator	Condition_Denominator	Degrees_Of_Freedom	Standard_Error	Log base 2 fold change of unmodified peptide (average Zika / average dengue)	Log base 2 fold change of modified peptide (average Zika / average dengue)	Log base 2 ratio of average protein abundance	Log base 2 adjusted foldchange (average Zika / average dengue)	p-value based on one sample t-test	p-value adjusted by Benjamini-Hochberg procedure
Oxidation	P15169	CPN1	Carboxypeptidase N catalytic chain	_IHILPSM[Oxidation (M)]NPDGYEVAAAQGPNKPGYLVGR_	_IHILPSMNPDGYEVAAAQGPNKPGYLVGR_	1	Zika	Dengue	3.04482	0.789659	0.464102	-8.71044	-0.000848772	-9.17454	0.00136954	0.00914655
Hex	A0A0A0MRZ9	IGLV5-52	Immunoglobulin lambda variable 5-52	_FSGSNDASAN[HexN]AGILR_	_FSGSNDASANAGILR_	1	Zika	Dengue	7.73292	0.618828	-1.68119	2.19135	-1.05561	3.87255	0.000420933	0.0034727
Phospho	P02652;V9GYM3	APOA2	Apolipoprotein A-II	_EPC[Carbamidomethyl (C)]VES[Phospho (STY)]LVSQYFQTVTDYGKDLMEK_	_EPC[Carbamidomethyl (C)]VESLVSQYFQTVTDYGKDLMEK_	2	Zika	Dengue	8.12413	0.528295	0.339908	-3.35956	0.23152	-3.69947	0.000112339	0.00113554
Methyl	A0A0B4J1V6	IGHV3-73	Immunoglobulin heavy variable 3-73	_TEDTAVYYC[Carbamidomethyl (C)]TR[Methyl (KR)]_	_TEDTAVYYC[Carbamidomethyl (C)]TR_	2	Zika	Dengue	26.8347	1.02802	-0.0443669	-3.71179	-0.180747	-3.66742	0.00142845	0.00942775
Oxidation	P00734	F2	Prothrombin	_YNWRENLDRDIALM[Oxidation (M)]K_	_YNWRENLDRDIALMK_	1	Zika	Dengue	22.6019	0.289661	0.159899	-3.4909	-0.0196258	-3.6508	1.54002e-11	1.43992e-09
Carboxy	P04433	IGKV3-11	Immunoglobulin kappa variable 3-11	_LLIYD[Carboxy]ASNRATGIPAR_	_LLIYDASNRATGIPAR_	1	Zika	Dengue	6.58761	0.78224	-3.52595	0.0900309	0.154397	3.61598	0.00360555	0.0203288
Oxidation	P08185	SERPINA6	Corticosteroid-binding globulin	_M[Oxidation (M)]NTVIAALSR_	_MNTVIAALSR_	1	Zika	Dengue	6.29194	0.541221	0.409643	-3.11486	-0.172452	-3.5245	0.000624965	0.00490357
Oxidation	P02679;P02679-2	FGG	Fibrinogen gamma chain;Isoform Gamma-A of Fibrinogen gamma chain	_AIQLTYNPDESSKPNM[Oxidation (M)]IDAATLK_	_AIQLTYNPDESSKPNMIDAATLK_	1	Zika	Dengue	11.424	0.521193	-3.14143	0.129339	-6.26132	3.27077	6.04029e-05	0.000657981
Phospho	P02671	FGA	Fibrinogen alpha chain	_TVIGPDGHKEVTKEVVTSEDGSDC[Carbamidomethyl (C)]PEAMDLGT[Phospho (STY)]LSGIGTLDGFR_	_TVIGPDGHKEVTKEVVTSEDGSDC[Carbamidomethyl (C)]PEAMDLGTLSGIGTLDGFR_	2	Zika	Dengue	23.5812	0.587542	-2.23589	-5.45582	-2.14754	-3.21993	1.42837e-05	0.000180071
Phospho	P06702	S100A9	Protein S100-A9	_MHEGDEGPGHHHKPGLGEGT[Phospho (STY)]P_	_MHEGDEGPGHHHKPGLGEGTP_	1	Zika	Dengue	4.12806	0.562879	-0.209028	-3.39956	-0.575848	-3.19053	0.00477767	0.0250493
Oxidation	P00747	PLG	Plasminogen	_C[Carbamidomethyl (C)]QSWSSM[Oxidation (M)]TPHR_	_C[Carbamidomethyl (C)]QSWSSMTPHR_	2	Zika	Dengue	15.6391	0.563114	0.0795423	-3.04592	0.151514	-3.12546	5.55696e-05	0.000617318
Methyl	A0A0B4J1V6	IGHV3-73	Immunoglobulin heavy variable 3-73	_LSC[Carbamidomethyl (C)]AASGFTFSGSAM[Oxidation (M)]HWVR[Methyl (KR)]_	_LSC[Carbamidomethyl (C)]AASGFTFSGSAM[Oxidation (M)]HWVR_	3	Zika	Dengue	4.22584	0.291619	-1.97525	1.14969	-0.180747	3.12494	0.000429777	0.00351978
Oxidation	P01031	C5	Complement C5	_M[Oxidation (M)]SAVEGIC[Carbamidomethyl (C)]TSESPVIDHQGTK_	_MSAVEGIC[Carbamidomethyl (C)]TSESPVIDHQGTK_	2	Zika	Dengue	4.51405	0.437784	0.142933	-2.95607	0.0635023	-3.099	0.00210197	0.0131023
Oxidation	P02042	HBD	Hemoglobin subunit delta	_FFESFGDLSSPDAVM[Oxidation (M)]GNPK_	_FFESFGDLSSPDAVMGNPK_	1	Zika	Dengue	9.9994	0.232271	1.69673	4.78807	1.65935	3.09134	3.17262e-07	6.84554e-06
Sulf	P06331	IGHV4-34	Immunoglobulin heavy variable 4-34	_GLEWIGEINHSGSTNY[Sulfation (Y)]NPSLK_	_GLEWIGEINHSGSTNYNPSLK_	1	Zika	Dengue	14.5397	0.720432	0.0356956	3.07229	0.290332	3.0366	0.000865003	0.00626151
Methyl	A0A075B6J9	IGLV2-18	Immunoglobulin lambda variable 2-18	_LMIYEVSNR[Methyl (KR)]PSGVPDRFSGSK_	_LMIYEVSNRPSGVPDRFSGSK_	1	Zika	Dengue	10.4782	0.255546	1.37123	-1.63704	-0.0401214	-3.00827	3.49846e-07	7.26902e-06
Oxidation	P01860	IGHG3	Immunoglobulin heavy constant gamma 3	_WQQGNIFSC[Carbamidomethyl (C)]SVM[Oxidation (M)]HEALHNR_	_WQQGNIFSC[Carbamidomethyl (C)]SVMHEALHNR_	2	Zika	Dengue	45.2189	0.463007	0.349288	-2.61609	-0.270957	-2.96538	7.81662e-08	2.19256e-06
Methyl	P02749	APOH	Beta-2-glycoprotein 1	_ASC[Carbamidomethyl (C)]K[Methyl (KR)]VPVKK_	_ASC[Carbamidomethyl (C)]KVPVKK_	2	Zika	Dengue	42.4357	0.517385	0.833278	-1.96531	0.112492	-2.79858	2.79576e-06	4.54616e-05
Oxidation	P06396	GSN	Gelsolin	_EPAHLM[Oxidation (M)]SLFGGKPMIIYKGGTSR_	_EPAHLMSLFGGKPMIIYKGGTSR_	1	Zika	Dengue	7.74726	0.390769	-0.0999113	2.66209	0.106623	2.762	0.000199176	0.00183176
Oxidation	P01857	IGHG1	Immunoglobulin heavy constant gamma 1	_LTVDKSRWQQGNVFSC[Carbamidomethyl (C)]SVM[Oxidation (M)]HEALHNHYTQK_	_LTVDKSRWQQGNVFSC[Carbamidomethyl (C)]SVMHEALHNHYTQK_	2	Zika	Dengue	52.4765	0.526241	-2.18922	0.355937	0.0360262	2.54515	1.21704e-05	0.000158781
Hex	P01857	IGHG1	Immunoglobulin heavy constant gamma 1	_VSNK[Hex]ALPAPIEK_	_VSNKALPAPIEK_	1	Zika	Dengue	177.987	0.115898	-2.791	-0.309513	0.0360262	2.48149	5.26743e-51	5.91005e-48
Oxidation	P00450	CP	Ceruloplasmin	_TPGIWLLHC[Carbamidomethyl (C)]HVTDHIHAGM[Oxidation (M)]ETTYTVLQNEDTK_	_TPGIWLLHC[Carbamidomethyl (C)]HVTDHIHAGMETTYTVLQNEDTK_	2	Zika	Dengue	30.8201	0.322456	0.160184	-2.16588	-0.175658	-2.32606	4.98756e-08	1.55446e-06
Oxidation	P04114	APOB	Apolipoprotein B-100	_NM[Oxidation (M)]EVSVATTTK_	_NMEVSVATTTK_	1	Zika	Dengue	32.7364	0.426261	0.164362	2.45813	0.10691	2.29377	6.55404e-06	9.80485e-05
Hex	P02768	ALB	Serum albumin	_SHC[Carbamidomethyl (C)]IAEVEN[HexN]DEMPADLPS[Hex]LAADFVESK_	_SHC[Carbamidomethyl (C)]IAEVENDEMPADLPSLAADFVESK_	3	Zika	Dengue	12.1948	0.516449	0.315655	-1.97587	0.33179	-2.29152	0.000810985	0.00598635
Oxidation	P01857	IGHG1	Immunoglobulin heavy constant gamma 1	_DTLM[Oxidation (M)]ISRTPEVTC[Carbamidomethyl (C)]VVVDVSHEDPEVK_	_DTLMISRTPEVTC[Carbamidomethyl (C)]VVVDVSHEDPEVK_	2	Zika	Dengue	61.9998	0.670744	-1.62295	0.57342	0.0360262	2.19637	0.00174675	0.0111992
Oxidation	P02671	FGA	Fibrinogen alpha chain	_TFPGFFSPM[Oxidation (M)]LGEFVSETESR_	_TFPGFFSPMLGEFVSETESR_	1	Zika	Dengue	79.8347	0.386336	-2.80554	-0.626169	-2.14754	2.17938	2.53355e-07	5.80131e-06
Oxidation	P01024	C3	Complement C3	_M[Oxidation (M)]DKVGKYPK_	_MDKVGKYPK_	1	Zika	Dengue	8.45696	0.586989	-0.54357	1.61861	0.0304025	2.16218	0.00618779	0.0303175
Methyl	P01706	IGLV2-11	Immunoglobulin lambda variable 2-11	_RPSGVPDRFSGSK[Methyl (KR)]_	_RPSGVPDRFSGSK_	1	Zika	Dengue	7.00325	0.598432	0.254696	-1.87889	0.282854	-2.13359	0.00915432	0.0404376
Hex	P01834	IGKC	Immunoglobulin kappa constant	_ADYEKHKVY[Hex]AC[Carbamidomethyl (C)]EVTHQGLSSPVTK_	_ADYEKHKVYAC[Carbamidomethyl (C)]EVTHQGLSSPVTK_	2	Zika	Dengue	20.3743	0.378851	-2.16657	-0.0331611	0.222279	2.13341	1.6403e-05	0.000202243
Oxidation	P01024	C3	Complement C3	_HLIVTPSGC[Carbamidomethyl (C)]GEQNM[Oxidation (M)]IGM[Oxidation (M)]TPTVIAVHYLDETEQWEK_	_HLIVTPSGC[Carbamidomethyl (C)]GEQNMIGMTPTVIAVHYLDETEQWEK_	3	Zika	Dengue	35.8093	0.313589	0.321891	-1.75895	0.0304025	-2.08084	1.13423e-07	2.89228e-06
Oxidation	P19823	ITIH2	Inter-alpha-trypsin inhibitor heavy chain H2	_M[Oxidation (M)]ATTM[Oxidation (M)]IQSK_	_MATTMIQSK_	2	Zika	Dengue	4.37157	0.315704	-0.364304	1.69777	0.0594793	2.06208	0.00283831	0.016761
Hex	P01834	IGKC	Immunoglobulin kappa constant	_HKVY[Hex]AC[Carbamidomethyl (C)]EVTHQGLSSPVTK_	_HKVYAC[Carbamidomethyl (C)]EVTHQGLSSPVTK_	2	Zika	Dengue	109.72	0.299529	-1.14201	0.889495	0.222279	2.0315	6.36603e-10	3.10551e-08
Methyl	P01703	IGLV1-40	Immunoglobulin lambda variable 1-40	_LLIYGNSNR[Methyl (KR)]PSGVPDR[Methyl (KR)]FSGSK_	_LLIYGNSNRPSGVPDRFSGSK_	2	Zika	Dengue	7.67242	0.499229	-0.449231	1.5712	0.11707	2.02044	0.00488864	0.0255119
Hex	P02768	ALB	Serum albumin	_TPVSDRVTK[Hex]C[Carbamidomethyl (C)]C[Carbamidomethyl (C)]TESLVNR_	_TPVSDRVTKC[Carbamidomethyl (C)]C[Carbamidomethyl (C)]TESLVNR_	3	Zika	Dengue	10.1795	0.517822	0.0198395	-1.97882	0.33179	-1.99866	0.00316157	0.0181912
Hex	P02768	ALB	Serum albumin	_YTKKVPQVS[Hex]TPTLVEVSR_	_YTKKVPQVSTPTLVEVSR_	1	Zika	Dengue	9.59462	0.434319	-2.44361	-0.445184	0.33179	1.99842	0.00128817	0.00875954
Oxidation	A0A0C4DH31	IGHV1-18	Immunoglobulin heavy variable 1-18	_VTM[Oxidation (M)]TTDTSTSTAYMELR_	_VTMTTDTSTSTAYMELR_	1	Zika	Dengue	47.8406	0.339063	-0.419061	-2.3612	-0.555654	-1.94214	6.92949e-07	1.31778e-05
Oxidation	P02768	ALB	Serum albumin	_SHC[Carbamidomethyl (C)]IAEVENDEM[Oxidation (M)]PADLPSLAADFVESKDVC[Carbamidomethyl (C)]KNYAEAK_	_SHC[Carbamidomethyl (C)]IAEVENDEMPADLPSLAADFVESKDVC[Carbamidomethyl (C)]KNYAEAK_	3	Zika	Dengue	101.01	0.33735	-1.59157	0.333104	0.33179	1.92467	1.16467e-07	2.90391e-06
Oxidation	P01861	IGHG4	Immunoglobulin heavy constant gamma 4	_GQPREPQVYTLPPSQEEM[Oxidation (M)]TK_	_GQPREPQVYTLPPSQEEMTK_	1	Zika	Dengue	51.1521	0.373931	0.31123	-1.61016	0.0463377	-1.92139	4.41293e-06	6.97368e-05
Oxidation	A0A075B7E8	IGHV3OR16-13	Immunoglobulin heavy variable 3/OR16-13 (non-functional) (Fragment)	_AEDM[Oxidation (M)]AVYYC[Carbamidomethyl (C)]TR_	_AEDMAVYYC[Carbamidomethyl (C)]TR_	2	Zika	Dengue	60.8293	0.645669	-2.85006	-0.94335	#N/A	1.90671	0.00448677	0.0242027
Hex	P02768	ALB	Serum albumin	_YTKK[Hex]VPQVSTPTLVEVSR_	_YTKKVPQVSTPTLVEVSR_	1	Zika	Dengue	3.2782	0.240392	-2.44361	-0.539006	0.33179	1.9046	0.00419234	0.0229454
Oxidation	P06396	GSN	Gelsolin	_VPEARPNSM[Oxidation (M)]VVEHPEFLK_	_VPEARPNSMVVEHPEFLK_	1	Zika	Dengue	10.5921	0.391822	0.146777	-1.75392	0.106623	-1.9007	0.000670448	0.00522391
Oxidation	P02751;P02751-15;P02751-3;P02751-7	FN1	Fibronectin;Isoform 15 of Fibronectin;Isoform 3 of Fibronectin;Isoform 7 of Fibronectin	_TEIDKPSQM[Oxidation (M)]QVTDVQDNSISVK_	_TEIDKPSQMQVTDVQDNSISVK_	1	Zika	Dengue	25.9256	0.319567	-0.113341	-1.9202	-0.16791	-1.80686	6.93482e-06	0.00010105
Oxidation	P04114	APOB	Apolipoprotein B-100	_KM[Oxidation (M)]TSNFPVDLSDYPK_	_KMTSNFPVDLSDYPK_	1	Zika	Dengue	16.424	0.291857	0.148274	1.94268	0.10691	1.79441	1.40167e-05	0.000178713
Methyl	P02768	ALB	Serum albumin	_LK[Dimethyl (KR)]EC[Carbamidomethyl (C)]C[Carbamidomethyl (C)]EKPLLEK_	_LKEC[Carbamidomethyl (C)]C[Carbamidomethyl (C)]EKPLLEK_	3	Zika	Dengue	64.2208	0.605748	-0.401055	-2.18983	0.33179	-1.78878	0.00439686	0.0238323
Oxidation	P05155;P05155-3	SERPING1	Plasma protease C1 inhibitor;Isoform 3 of Plasma protease C1 inhibitor	_M[Oxidation (M)]EPFHFKNSVIKVPMMNSK_	_MEPFHFKNSVIKVPMMNSK_	1	Zika	Dengue	20.7011	0.287754	-0.361275	-2.1329	0.113681	-1.77163	5.14302e-06	8.01454e-05
Oxidation	P02675	FGB	Fibrinogen beta chain	_HGTDDGVVWM[Oxidation (M)]NWK_	_HGTDDGVVWMNWK_	1	Zika	Dengue	36.0951	0.19075	-6.09326	-4.35455	-6.19643	1.73871	6.95188e-11	4.58824e-09
Methyl	P01859	IGHG2	Immunoglobulin heavy constant gamma 2	_VSNK[Methyl (KR)]GLPAPIEK_	_VSNKGLPAPIEK_	1	Zika	Dengue	120.556	0.37544	-1.21815	-2.94133	0.291454	-1.72318	1.10042e-05	0.000145255
Methyl	P01857	IGHG1	Immunoglobulin heavy constant gamma 1	_WQQGNVFSC[Carbamidomethyl (C)]SVM[Oxidation (M)]HEALHNHYTQK[Methyl (KR)]_	_WQQGNVFSC[Carbamidomethyl (C)]SVM[Oxidation (M)]HEALHNHYTQK_	3	Zika	Dengue	156.761	0.282033	0.112798	-1.60513	0.0360262	-1.71793	8.3968e-09	3.36472e-07
Oxidation	P02787	TF	Serotransferrin	_TAGWNIPM[Oxidation (M)]GLLYNKINHC[Carbamidomethyl (C)]RFDEFFSEGC[Carbamidomethyl (C)]APGSK_	_TAGWNIPMGLLYNKINHC[Carbamidomethyl (C)]RFDEFFSEGC[Carbamidomethyl (C)]APGSK_	3	Zika	Dengue	133.116	0.266331	-0.00714861	-1.69544	0.214172	-1.6883	3.32431e-09	1.49195e-07
Oxidation	P69905	HBA1	Hemoglobin subunit alpha	_KVADALTNAVAHVDDM[Oxidation (M)]PNALSALSDLHAHK_	_KVADALTNAVAHVDDMPNALSALSDLHAHK_	1	Zika	Dengue	33.8051	0.265033	1.97282	0.284685	1.46579	-1.68813	3.265e-07	6.91194e-06
Hex	P02768	ALB	Serum albumin	_PC[Carbamidomethyl (C)]FSALEVDET[HexN]YVPKEFNAETFTFHADIC[Carbamidomethyl (C)]TLSEKER_	_PC[Carbamidomethyl (C)]FSALEVDETYVPKEFNAETFTFHADIC[Carbamidomethyl (C)]TLSEKER_	3	Zika	Dengue	85.3559	0.160473	-1.80669	-0.133038	0.33179	1.67365	7.0425e-17	1.31695e-14
Methyl	A0A075B6K5	IGLV3-9	Immunoglobulin lambda variable 3-9	_DSNR[Dimethyl (KR)]PSGIPER_	_DSNRPSGIPER_	1	Zika	Dengue	47.1805	0.368925	-0.250514	1.41855	0.0876079	1.66906	4.11802e-05	0.000471472
Oxidation	P02671	FGA	Fibrinogen alpha chain	_M[Oxidation (M)]ELERPGGNEITR_	_MELERPGGNEITR_	1	Zika	Dengue	28.2478	0.199908	-5.42395	-3.75889	-2.14754	1.66506	4.61761e-09	1.91887e-07
Hex	P02768	ALB	Serum albumin	_LVNEVTEFAKT[Hex]C[Carbamidomethyl (C)]VADESAENC[Carbamidomethyl (C)]DK_	_LVNEVTEFAKTC[Carbamidomethyl (C)]VADESAENC[Carbamidomethyl (C)]DK_	3	Zika	Dengue	76.8528	0.10724	-1.32981	0.334962	0.33179	1.66477	2.81287e-25	1.05201e-22
Oxidation	P01023	A2M	Alpha-2-macroglobulin	_RTTVM[Oxidation (M)]VK_	_RTTVMVK_	1	Zika	Dengue	10.6064	0.454522	0.332005	-1.33155	-0.261861	-1.66355	0.00438904	0.0239053
Hex	P02768	ALB	Serum albumin	_EC[Carbamidomethyl (C)]C[Carbamidomethyl (C)]EK[Hex]PLLEK_	_EC[Carbamidomethyl (C)]C[Carbamidomethyl (C)]EKPLLEK_	3	Zika	Dengue	142.576	0.525984	-0.172819	-1.82076	0.33179	-1.64794	0.00210176	0.0131742
Oxidation	P00450	CP	Ceruloplasmin	_WYLFGM[Oxidation (M)]GNEVDVHAAFFHGQALTNK_	_WYLFGMGNEVDVHAAFFHGQALTNK_	1	Zika	Dengue	3.73232	0.267853	0.404486	2.04829	-0.175658	1.6438	0.00870128	0.0395257
Hex	P02768	ALB	Serum albumin	_LAK[Hex]TYETTLEK_	_LAKTYETTLEK_	1	Zika	Dengue	89.8657	0.222254	-1.11529	0.522958	0.33179	1.63825	8.31119e-11	4.90798e-09
Methyl	P02768	ALB	Serum albumin	_K[Methyl (KR)]VPQVSTPTLVEVSR_	_KVPQVSTPTLVEVSR_	1	Zika	Dengue	190.826	0.235582	0.19495	-1.44032	0.33179	-1.63527	5.96475e-11	4.18278e-09
Methyl	P01703	IGLV1-40	Immunoglobulin lambda variable 1-40	_LLIYGNSNR[Methyl (KR)]_	_LLIYGNSNR_	1	Zika	Dengue	100.273	0.216148	-0.935677	0.683083	0.11707	1.61876	2.80191e-11	2.24553e-09
Hex	P02768	ALB	Serum albumin	_AAC[Carbamidomethyl (C)]LLPK[Hex]LDELRDEGK_	_AAC[Carbamidomethyl (C)]LLPKLDELRDEGK_	2	Zika	Dengue	185.071	0.0915209	-1.59209	0.0256041	0.33179	1.61769	1.35867e-41	7.62214e-39
Oxidation	P01023	A2M	Alpha-2-macroglobulin	_M[Oxidation (M)]C[Carbamidomethyl (C)]PQLQQYEM[Oxidation (M)]HGPEGLR_	_MC[Carbamidomethyl (C)]PQLQQYEMHGPEGLR_	3	Zika	Dengue	101.646	0.299344	-0.202645	-1.79573	-0.261861	-1.59308	6.21093e-07	1.20149e-05
Oxidation	P02768	ALB	Serum albumin	_M[Oxidation (M)]PC[Carbamidomethyl (C)]AEDYLSVVLNQLC[Carbamidomethyl (C)]VLHEKTPVSDR_	_MPC[Carbamidomethyl (C)]AEDYLSVVLNQLC[Carbamidomethyl (C)]VLHEKTPVSDR_	3	Zika	Dengue	70.4647	0.264026	-0.165339	1.42472	0.33179	1.59006	7.15375e-08	2.11224e-06
Oxidation	Q14624	ITIH4	Inter-alpha-trypsin inhibitor heavy chain H4	_M[Oxidation (M)]NFRPGVLSSR_	_MNFRPGVLSSR_	1	Zika	Dengue	81.7258	0.274558	0.14304	-1.44296	0.213437	-1.586	1.36186e-07	3.32175e-06
Oxidation	P01704	IGLV2-14	Immunoglobulin lambda variable 2-14	_LM[Oxidation (M)]IYEVSNRPSGVSNR_	_LMIYEVSNRPSGVSNR_	1	Zika	Dengue	83.317	0.469649	0.417502	-1.16453	0.335701	-1.58203	0.00114793	0.00799987
Hex	P01834	IGKC	Immunoglobulin kappa constant	_VQWKVDN[Hex]ALQSGNSQESVTEQDSK_	_VQWKVDNALQSGNSQESVTEQDSK_	1	Zika	Dengue	4.69847	0.121468	-0.908665	0.661605	0.222279	1.57027	0.000206523	0.00185375
Methyl	A0A0C4DH32	IGHV3-20	Immunoglobulin heavy variable 3-20	_AEDTALYHC[Carbamidomethyl (C)]AR[Methyl (KR)]_	_AEDTALYHC[Carbamidomethyl (C)]AR_	2	Zika	Dengue	10.2273	0.365004	-1.24053	0.326508	-0.566534	1.56704	0.00157823	0.0102357
Oxidation	P04114	APOB	Apolipoprotein B-100	_TGISPLALIKGM[Oxidation (M)]TRPLSTLISSSQSC[Carbamidomethyl (C)]QYTLDAK_	_TGISPLALIKGMTRPLSTLISSSQSC[Carbamidomethyl (C)]QYTLDAK_	2	Zika	Dengue	10.7457	0.453485	0.423369	-1.11307	0.10691	-1.53644	0.00690824	0.0331241
Oxidation	P60709	ACTB	Actin, cytoplasmic 1	_HQGVM[Oxidation (M)]VGMGQK_	_HQGVMVGMGQK_	1	Zika	Dengue	41.6828	0.250406	-1.26281	0.273574	#N/A	1.53638	2.77493e-07	6.22694e-06
Carboxy	P02768	ALB	Serum albumin	_SLHTLFGD[Carboxy]K[Carboxy]LC[Carbamidomethyl (C)]TVATLR_	_SLHTLFGDKLC[Carbamidomethyl (C)]TVATLR_	3	Zika	Dengue	47.9856	0.574471	0.453096	-1.08158	0.33179	-1.53468	0.0103439	0.0441288
Oxidation	P01860	IGHG3	Immunoglobulin heavy constant gamma 3	_EEM[Oxidation (M)]TKNQVSLTC[Carbamidomethyl (C)]LVK_	_EEMTKNQVSLTC[Carbamidomethyl (C)]LVK_	2	Zika	Dengue	112.698	0.284343	0.0841916	-1.44122	-0.270957	-1.52541	4.41811e-07	8.852e-06
Methyl	A0A087WSY6	IGKV3D-15	Immunoglobulin kappa variable 3D-15	_LLIYGASIR[Dimethyl (KR)]_	_LLIYGASIR_	1	Zika	Dengue	66.4329	0.547919	0.582971	-0.940981	0.416658	-1.52395	0.0070492	0.0333722
Oxidation	P19827	ITIH1	Inter-alpha-trypsin inhibitor heavy chain H1	_ADVQAHGEGQEFSITC[Carbamidomethyl (C)]LVDEEEM[Oxidation (M)]KK_	_ADVQAHGEGQEFSITC[Carbamidomethyl (C)]LVDEEEMKK_	2	Zika	Dengue	8.54169	0.444602	0.302086	1.82271	0.173315	1.52062	0.00908544	0.0402919
Hex	P02768	ALB	Serum albumin	_SHC[Carbamidomethyl (C)]IAEVENDEMPADLPS[Hex]LAADFVESKDVC[Carbamidomethyl (C)]KNYAEAK_	_SHC[Carbamidomethyl (C)]IAEVENDEMPADLPSLAADFVESKDVC[Carbamidomethyl (C)]KNYAEAK_	3	Zika	Dengue	80.9687	0.323046	-0.752548	-2.25599	0.33179	-1.50344	1.27268e-05	0.000164132
Oxidation	P02760	AMBP	Protein AMBP	_KEDSC[Carbamidomethyl (C)]QLGYSAGPC[Carbamidomethyl (C)]MGM[Oxidation (M)]TSR_	_KEDSC[Carbamidomethyl (C)]QLGYSAGPC[Carbamidomethyl (C)]MGMTSR_	3	Zika	Dengue	15.0867	0.220131	0.122253	-1.36214	-0.0706624	-1.48439	6.60022e-06	9.74401e-05
Carboxy	P02763	ORM1	Alpha-1-acid glycoprotein 1	_YVGGQE[Carboxy]HFAHLLILR_	_YVGGQEHFAHLLILR_	1	Zika	Dengue	125.345	0.429153	0.177644	-1.30643	-0.0316811	-1.48408	0.000744165	0.00560371
Oxidation	P01009	SERPINA1	Alpha-1-antitrypsin	_LGM[Oxidation (M)]FNIQHC[Carbamidomethyl (C)]K_	_LGMFNIQHC[Carbamidomethyl (C)]K_	2	Zika	Dengue	140.818	0.206576	-0.287505	-1.77016	0.0633371	-1.48266	3.80452e-11	2.84578e-09
Methyl	P01834	IGKC	Immunoglobulin kappa constant	_ADYEKHK[Methyl (KR)]VYAC[Carbamidomethyl (C)]EVTHQGLSSPVTK_	_ADYEKHKVYAC[Carbamidomethyl (C)]EVTHQGLSSPVTK_	2	Zika	Dengue	18.081	0.469913	-0.794943	-2.26912	0.222279	-1.47417	0.00569697	0.0285357
Oxidation	P01008	SERPINC1	Antithrombin-III	_EVPLNTIIFM[Oxidation (M)]GR_	_EVPLNTIIFMGR_	1	Zika	Dengue	6.88064	0.403514	0.307471	1.77728	-0.131923	1.46981	0.0108022	0.0453936
Hex	P02790	HPX	Hemopexin	_SLGPNSC[Carbamidomethyl (C)]SANGPGLY[Hex]LIHGPNLYC[Carbamidomethyl (C)]YSDVEKLNAAK_	_SLGPNSC[Carbamidomethyl (C)]SANGPGLYLIHGPNLYC[Carbamidomethyl (C)]YSDVEKLNAAK_	3	Zika	Dengue	25.2141	0.525981	-0.219697	1.24992	0.0458263	1.46961	0.00984635	0.0424908
Oxidation	P09871	C1S	Complement C1s subcomponent	_YHGDPM[Oxidation (M)]PC[Carbamidomethyl (C)]PKEDTPNSVWEPAK_	_YHGDPMPC[Carbamidomethyl (C)]PKEDTPNSVWEPAK_	2	Zika	Dengue	13.1805	0.140432	-0.242621	1.22579	-0.0609279	1.46841	1.06953e-07	2.79073e-06
Oxidation	P01706	IGLV2-11	Immunoglobulin lambda variable 2-11	_LM[Oxidation (M)]IYDVSK_	_LMIYDVSK_	1	Zika	Dengue	77.8968	0.304959	0.301191	-1.15912	0.282854	-1.46031	7.97327e-06	0.000113241
Methyl	P01871	IGHM	Immunoglobulin heavy constant mu	_GGKYAATSQVLLPSK[Methyl (KR)]DVMQGTDEHVVC[Carbamidomethyl (C)]K_	_GGKYAATSQVLLPSKDVMQGTDEHVVC[Carbamidomethyl (C)]K_	2	Zika	Dengue	8.97248	0.382357	-0.211872	-1.65982	0.168447	-1.44795	0.00533522	0.0273339
Hex	P02768	ALB	Serum albumin	_ADDK[Hex]ETC[Carbamidomethyl (C)]FAEEGKK_	_ADDKETC[Carbamidomethyl (C)]FAEEGKK_	2	Zika	Dengue	134.894	0.213722	0.0609163	-1.37551	0.33179	-1.43642	4.72903e-10	2.4118e-08
Oxidation	P01023	A2M	Alpha-2-macroglobulin	_HNVYINGITYTPVSSTNEKDM[Oxidation (M)]YSFLEDMGLK_	_HNVYINGITYTPVSSTNEKDMYSFLEDMGLK_	1	Zika	Dengue	45.3892	0.241201	0.248441	-1.18662	-0.261861	-1.43506	3.70864e-07	7.56562e-06
Oxidation	P51884	LUM	Lumican	_SVPM[Oxidation (M)]VPPGIK_	_SVPMVPPGIK_	1	Zika	Dengue	21.061	0.401041	0.0814067	-1.35172	-0.460625	-1.43313	0.00179241	0.0114266
Carboxy	A0A0B4J2B5	IGHV3OR16-9	Immunoglobulin heavy variable 3/OR16-9 (non-functional) (Fragment)	_EVQLVE[Carboxy]SGGGLVQPGGSLR_	_EVQLVESGGGLVQPGGSLR_	1	Zika	Dengue	126.766	0.307989	-0.176916	-1.55991	-0.235592	-1.38299	1.58631e-05	0.00019776
Methyl	P02768	ALB	Serum albumin	_NEC[Carbamidomethyl (C)]FLQHK[Dimethyl (KR)]DDNPNLPR_	_NEC[Carbamidomethyl (C)]FLQHKDDNPNLPR_	2	Zika	Dengue	94.914	0.40909	0.272116	-1.10766	0.33179	-1.37978	0.00108186	0.00763426
Oxidation	P19652	ORM2	Alpha-1-acid glycoprotein 2	_SDVM[Oxidation (M)]YTDWKK_	_SDVMYTDWKK_	1	Zika	Dengue	128.025	0.17991	-0.2787	-1.65743	0.125434	-1.37873	3.9417e-12	4.42259e-10
Oxidation	P01024	C3	Complement C3	_IRYYTYLIM[Oxidation (M)]NK_	_IRYYTYLIMNK_	1	Zika	Dengue	67.6315	0.229153	0.354461	-1.0237	0.0304025	-1.37816	8.38262e-08	2.23936e-06
Oxidation	P02749	APOH	Beta-2-glycoprotein 1	_GGM[Oxidation (M)]RKFIC[Carbamidomethyl (C)]PLTGLWPINTLK_	_GGMRKFIC[Carbamidomethyl (C)]PLTGLWPINTLK_	2	Zika	Dengue	20.8824	0.441219	-0.322227	-1.69811	0.112492	-1.37589	0.00541433	0.0276131
Oxidation	P08603	CFH	Complement factor H	_FVC[Carbamidomethyl (C)]NSGYKIEGDEEM[Oxidation (M)]HC[Carbamidomethyl (C)]SDDGFWSK_	_FVC[Carbamidomethyl (C)]NSGYKIEGDEEMHC[Carbamidomethyl (C)]SDDGFWSK_	3	Zika	Dengue	94.9443	0.212402	-0.343895	-1.68528	-0.00343657	-1.34138	8.87169e-09	3.43243e-07
Oxidation	P02671	FGA	Fibrinogen alpha chain	_TVIGPDGHKEVTKEVVTSEDGSDC[Carbamidomethyl (C)]PEAM[Oxidation (M)]DLGTLSGIGTLDGFR_	_TVIGPDGHKEVTKEVVTSEDGSDC[Carbamidomethyl (C)]PEAMDLGTLSGIGTLDGFR_	2	Zika	Dengue	34.8401	0.225513	-2.23589	-3.56768	-2.14754	-1.33179	1.14193e-06	1.97114e-05
Oxidation	P0C0L5	C4B	Complement C4-B	_MRPSTDTITVM[Oxidation (M)]VENSHGLR_	_MRPSTDTITVMVENSHGLR_	1	Zika	Dengue	120.211	0.226335	-0.176522	-1.50811	0.125625	-1.33158	3.72435e-08	1.19392e-06
Methyl	P01705	IGLV2-23	Immunoglobulin lambda variable 2-23	_LMIYEGSK[Dimethyl (KR)]_	_LMIYEGSK_	1	Zika	Dengue	27.7958	0.445808	-0.328669	1.00109	-0.552645	1.32976	0.00599264	0.0297511
Oxidation	P02671	FGA	Fibrinogen alpha chain	_M[Oxidation (M)]ADEAGSEADHEGTHSTK_	_MADEAGSEADHEGTHSTK_	1	Zika	Dengue	88.2553	0.214135	-2.29212	-0.965857	-2.14754	1.32627	1.83306e-08	6.63448e-07
Oxidation	P05155;P05155-3	SERPING1	Plasma protease C1 inhibitor;Isoform 3 of Plasma protease C1 inhibitor	_VTTSQDM[Oxidation (M)]LSIMEK_	_VTTSQDMLSIMEK_	1	Zika	Dengue	8.5571	0.158648	0.221794	1.51363	0.113681	1.29184	3.84376e-05	0.000444608
Methyl	Q03468	ERCC6	DNA excision repair protein ERCC-6	_VLLFSQSR[Methyl (KR)]_	_VLLFSQSR_	1	Zika	Dengue	55.9998	0.444796	-0.704819	0.572092	NA	1.27691	0.00580219	0.0289336
Methyl	P06310	IGKV2-30	Immunoglobulin kappa variable 2-30	_VSNR[Methyl (KR)]DSGVPDRFSGSGSGTDFTLK_	_VSNRDSGVPDRFSGSGSGTDFTLK_	1	Zika	Dengue	9.07171	0.21512	-0.13155	-1.40639	0.0451725	-1.27484	0.000221767	0.00197479
Methyl	P01857	IGHG1	Immunoglobulin heavy constant gamma 1	_WQQGNVFSC[Carbamidomethyl (C)]SVMHEALHNHYTQK[Methyl (KR)]_	_WQQGNVFSC[Carbamidomethyl (C)]SVMHEALHNHYTQK_	2	Zika	Dengue	187.721	0.21671	0.213379	-1.05837	0.0360262	-1.27174	1.96736e-08	6.89806e-07
Oxidation	P04114	APOB	Apolipoprotein B-100	_GM[Oxidation (M)]ALFGEGK_	_GMALFGEGK_	1	Zika	Dengue	11.641	0.403214	0.288768	-0.973417	0.10691	-1.26219	0.00957233	0.0419537
Oxidation	P01861	IGHG4	Immunoglobulin heavy constant gamma 4	_AKGQPREPQVYTLPPSQEEM[Oxidation (M)]TK_	_AKGQPREPQVYTLPPSQEEMTK_	1	Zika	Dengue	14.2709	0.4338	0.505895	-0.75171	0.0463377	-1.2576	0.0116642	0.0481147
Oxidation	P04114	APOB	Apolipoprotein B-100	_GM[Oxidation (M)]TRPLSTLISSSQSC[Carbamidomethyl (C)]QYTLDAK_	_GMTRPLSTLISSSQSC[Carbamidomethyl (C)]QYTLDAK_	2	Zika	Dengue	50.5306	0.222114	0.303923	1.56007	0.10691	1.25615	7.47247e-07	1.35228e-05
Hex	P02768	ALB	Serum albumin	_QIKK[Hex]QTALVELVK_	_QIKKQTALVELVK_	1	Zika	Dengue	172.749	0.163797	-1.67909	-0.431437	0.33179	1.24765	1.65668e-12	2.06532e-10
Oxidation	P00738	HP	Haptoglobin	_VM[Oxidation (M)]PIC[Carbamidomethyl (C)]LPSK_	_VMPIC[Carbamidomethyl (C)]LPSK_	2	Zika	Dengue	138.76	0.219475	0.28649	-0.959902	-0.140561	-1.24639	7.70214e-08	2.21585e-06
Phospho	P69905	HBA1	Hemoglobin subunit alpha	_VADALT[Phospho (STY)]NAVAHVDDM[Oxidation (M)]PNALS[Phospho (STY)]ALSDLHAHK_	_VADALTNAVAHVDDM[Oxidation (M)]PNALSALSDLHAHK_	3	Zika	Dengue	15.7159	0.225485	2.19205	0.952208	1.46579	-1.23984	6.12183e-05	0.000660451
Hex	P02768	ALB	Serum albumin	_EQLK[Hex]AVMDDFAAFVEK_	_EQLKAVMDDFAAFVEK_	1	Zika	Dengue	164.285	0.2432	0.517166	-0.719828	0.33179	-1.23699	9.88716e-07	1.73334e-05
Hex	P02768	ALB	Serum albumin	_ADDKET[Hex]C[Carbamidomethyl (C)]FAEEGKK_	_ADDKETC[Carbamidomethyl (C)]FAEEGKK_	2	Zika	Dengue	38.8943	0.307589	0.0609163	1.28984	0.33179	1.22892	0.000286332	0.00247127
Oxidation	P04003	C4BPA	C4b-binding protein alpha chain	_LM[Oxidation (M)]QC[Carbamidomethyl (C)]LPNPEDVK_	_LMQC[Carbamidomethyl (C)]LPNPEDVK_	2	Zika	Dengue	115.234	0.199034	-0.0904761	-1.31913	-0.273775	-1.22865	1.03522e-08	3.87171e-07
Oxidation	P01023	A2M	Alpha-2-macroglobulin	_AVDQSVLLM[Oxidation (M)]KPDAELSASSVYNLLPEK_	_AVDQSVLLMKPDAELSASSVYNLLPEK_	1	Zika	Dengue	97.9303	0.213606	0.238459	-0.956059	-0.261861	-1.19452	2.06655e-07	4.83055e-06
Oxidation	P01024	C3	Complement C3	_QDSLSSQNQLGVLPLSWDIPELVNM[Oxidation (M)]GQWK_	_QDSLSSQNQLGVLPLSWDIPELVNMGQWK_	1	Zika	Dengue	50.3523	0.262665	-0.544689	0.649801	0.0304025	1.19449	3.47217e-05	0.000410081
Methyl	P02768	ALB	Serum albumin	_ATKEQLK[Dimethyl (KR)]AVM[Oxidation (M)]DDFAAFVEK_	_ATKEQLKAVM[Oxidation (M)]DDFAAFVEK_	2	Zika	Dengue	74.6098	0.339372	0.380069	-0.814222	0.33179	-1.19429	0.000744528	0.00556907
Oxidation	D6R934;P02746	C1QB	Complement C1q subcomponent subunit B	_DQTIRFDHVITNM[Oxidation (M)]NNNYEPR_	_DQTIRFDHVITNMNNNYEPR_	1	Zika	Dengue	68.8792	0.22385	-0.192066	-1.35761	0.0414949	-1.16554	1.93977e-06	3.29761e-05
Oxidation	P01024	C3	Complement C3	_IRYYTYLIM[Oxidation (M)]NKGR_	_IRYYTYLIMNKGR_	1	Zika	Dengue	16.7041	0.238321	-0.0672224	1.08343	0.0304025	1.15066	0.000185371	0.00180858
Hex	P01834	IGKC	Immunoglobulin kappa constant	_TVAAPSVFIFPPSDEQLKSGT[Hex]ASVVC[Carbamidomethyl (C)]LLNNFYPR_	_TVAAPSVFIFPPSDEQLKSGTASVVC[Carbamidomethyl (C)]LLNNFYPR_	2	Zika	Dengue	37.0445	0.217832	-0.288739	0.859365	0.222279	1.1481	6.09737e-06	9.24493e-05
Oxidation	P04114	APOB	Apolipoprotein B-100	_NFATSNKM[Oxidation (M)]DMTFSK_	_NFATSNKMDMTFSK_	1	Zika	Dengue	47.4865	0.168594	-0.0129519	1.11477	0.10691	1.12773	2.42385e-08	7.99871e-07
Methyl	P02768	ALB	Serum albumin	_LK[Methyl (KR)]EC[Carbamidomethyl (C)]C[Carbamidomethyl (C)]EKPLLEK_	_LKEC[Carbamidomethyl (C)]C[Carbamidomethyl (C)]EKPLLEK_	3	Zika	Dengue	72.5982	0.393685	-0.401055	0.707755	0.33179	1.10881	0.00626081	0.0305419
Oxidation	P08519	LPA	Apolipoprotein(a)	_TC[Carbamidomethyl (C)]QAWSSM[Oxidation (M)]TPHSHSR_	_TC[Carbamidomethyl (C)]QAWSSMTPHSHSR_	2	Zika	Dengue	41.9142	0.335336	-0.87224	0.231929	-0.0942924	1.10417	0.00204855	0.0129128
Methyl	P02768	ALB	Serum albumin	_AEFAEVSK[Dimethyl (KR)]LVTDLTK_	_AEFAEVSKLVTDLTK_	1	Zika	Dengue	85.5024	0.302447	-0.213693	0.886271	0.33179	1.09996	0.000472244	0.00381192
Oxidation	P0C0L5	C4B	Complement C4-B	_TLEIPGNSDPNM[Oxidation (M)]IPDGDFNSYVR_	_TLEIPGNSDPNMIPDGDFNSYVR_	1	Zika	Dengue	183.079	0.174787	0.0470954	-1.03226	0.125625	-1.07936	4.16335e-09	1.79665e-07
Oxidation	P01871	IGHM	Immunoglobulin heavy constant mu	_YVTSAPM[Oxidation (M)]PEPQAPGR_	_YVTSAPMPEPQAPGR_	1	Zika	Dengue	148.17	0.225754	0.373099	-0.691906	0.168447	-1.065	5.47438e-06	8.41405e-05
Hex	P02768	ALB	Serum albumin	_LDELR[Hex]DEGKASSAK_	_LDELRDEGKASSAK_	1	Zika	Dengue	153.153	0.08953	-1.17597	-0.113049	0.33179	1.06292	1.86804e-23	5.23986e-21
Oxidation	P01009	SERPINA1	Alpha-1-antitrypsin	_FNKPFVFLM[Oxidation (M)]IEQNTKSPLFM[Oxidation (M)]GK_	_FNKPFVFLMIEQNTKSPLFMGK_	2	Zika	Dengue	21.445	0.335071	0.423791	-0.63697	0.0633371	-1.06076	0.00465873	0.0246561
Methyl	A0A075B6K5	IGLV3-9	Immunoglobulin lambda variable 3-9	_ITC[Carbamidomethyl (C)]GGNNIGSK[Methyl (KR)]_	_ITC[Carbamidomethyl (C)]GGNNIGSK_	2	Zika	Dengue	37.8293	0.234725	-0.288148	-1.34663	0.0876079	-1.05848	6.34653e-05	0.000678172
Carboxy	P04211	IGLV7-43	Immunoglobulin lambda variable 7-43	_FSGSLLGGK[Carboxy]_	_FSGSLLGGK_	1	Zika	Dengue	14.3374	0.265058	0.0733158	-0.965336	0.0499138	-1.03865	0.00154425	0.0100735
Methyl	P02749	APOH	Beta-2-glycoprotein 1	_ASC[Carbamidomethyl (C)]K[Methyl (KR)]VPVK_	_ASC[Carbamidomethyl (C)]KVPVK_	2	Zika	Dengue	44.5058	0.275213	-0.432228	-1.46208	0.112492	-1.02985	0.000525499	0.0042115
Oxidation	P00450	CP	Ceruloplasmin	_M[Oxidation (M)]YYSAVDPTKDIFTGLIGPM[Oxidation (M)]K_	_MYYSAVDPTKDIFTGLIGPMK_	2	Zika	Dengue	52.3108	0.29191	0.150778	-0.869165	-0.175658	-1.01994	0.000980997	0.00705563
Hex	P00738	HP	Haptoglobin	_AVGDK[Hex]LPEC[Carbamidomethyl (C)]EAVC[Carbamidomethyl (C)]GKPK_	_AVGDKLPEC[Carbamidomethyl (C)]EAVC[Carbamidomethyl (C)]GKPK_	3	Zika	Dengue	94.0394	0.266078	-0.142599	-1.1603	-0.140561	-1.0177	0.000235341	0.00207916
Oxidation	P01009	SERPINA1	Alpha-1-antitrypsin	_GTEAAGAM[Oxidation (M)]FLEAIPM[Oxidation (M)]SIPPEVK_	_GTEAAGAMFLEAIPMSIPPEVK_	2	Zika	Dengue	149.852	0.312145	0.178261	-0.82225	0.0633371	-1.00051	0.00165103	0.0106463
Hex	P01024	C3	Complement C3	_LDK[Hex]AC[Carbamidomethyl (C)]EPGVDYVYK_	_LDKAC[Carbamidomethyl (C)]EPGVDYVYK_	2	Zika	Dengue	74.6706	0.374987	-0.181564	-1.18104	0.0304025	-0.99948	0.00943679	0.0415219
Oxidation	P05543	SERPINA7	Thyroxine-binding globulin	_EGQMESVEAAM[Oxidation (M)]SSK_	_EGQMESVEAAMSSK_	1	Zika	Dengue	14.7494	0.233091	-0.182226	-1.17071	0.0193921	-0.988484	0.00082276	0.00603357
Oxidation	P01024	C3	Complement C3	_LESEETM[Oxidation (M)]VLEAHDAQGDVPVTVTVHDFPGKK_	_LESEETMVLEAHDAQGDVPVTVTVHDFPGKK_	1	Zika	Dengue	148.915	0.134764	0.28999	-0.69817	0.0304025	-0.98816	1.36843e-11	1.39579e-09
Oxidation	P02751;P02751-15;P02751-3;P02751-7	FN1	Fibronectin;Isoform 15 of Fibronectin;Isoform 3 of Fibronectin;Isoform 7 of Fibronectin	_FGFC[Carbamidomethyl (C)]PMAAHEEIC[Carbamidomethyl (C)]TTNEGVM[Oxidation (M)]YR_	_FGFC[Carbamidomethyl (C)]PMAAHEEIC[Carbamidomethyl (C)]TTNEGVMYR_	3	Zika	Dengue	23.3397	0.262399	-0.127982	-1.11094	-0.16791	-0.982961	0.00105464	0.00753698
Oxidation	P07357	C8A	Complement component C8 alpha chain	_M[Oxidation (M)]ESLGITSR_	_MESLGITSR_	1	Zika	Dengue	109.746	0.211075	0.186746	-0.79575	-0.0273102	-0.982496	9.19118e-06	0.000124247
Sulf	P01834	IGKC	Immunoglobulin kappa constant	_HKVY[Sulfation (Y)]AC[Carbamidomethyl (C)]EVTHQGLSSPVTK_	_HKVYAC[Carbamidomethyl (C)]EVTHQGLSSPVTK_	2	Zika	Dengue	105.453	0.373265	-0.880114	0.102213	0.222279	0.982327	0.0097753	0.0425112
Hex	P02768	ALB	Serum albumin	_YKAAFT[Hex]EC[Carbamidomethyl (C)]C[Carbamidomethyl (C)]QAADK_	_YKAAFTEC[Carbamidomethyl (C)]C[Carbamidomethyl (C)]QAADK_	3	Zika	Dengue	21.2324	0.341443	0.0691412	1.05055	0.33179	0.981413	0.00907717	0.040415
Oxidation	P04114	APOB	Apolipoprotein B-100	_LLLQM[Oxidation (M)]DSSATAYGSTVSKR_	_LLLQMDSSATAYGSTVSKR_	1	Zika	Dengue	73.9329	0.333426	0.248048	1.2236	0.10691	0.975551	0.00457564	0.0243311
Oxidation	P01023	A2M	Alpha-2-macroglobulin	_M[Oxidation (M)]VSGFIPLKPTVK_	_MVSGFIPLKPTVK_	1	Zika	Dengue	168.223	0.140395	0.158302	-0.816148	-0.261861	-0.97445	8.10149e-11	5.04993e-09
Oxidation	P05155;P05155-3	SERPING1	Plasma protease C1 inhibitor;Isoform 3 of Plasma protease C1 inhibitor	_NSVIKVPM[Oxidation (M)]MNSK_	_NSVIKVPMMNSK_	1	Zika	Dengue	15.2045	0.208784	-0.115059	-1.08888	0.113681	-0.973822	0.000305541	0.00261693
Hex	P02768	ALB	Serum albumin	_LK[Hex]EC[Carbamidomethyl (C)]C[Carbamidomethyl (C)]EKPLLEK_	_LKEC[Carbamidomethyl (C)]C[Carbamidomethyl (C)]EKPLLEK_	3	Zika	Dengue	100.543	0.242221	-0.343163	-1.31335	0.33179	-0.970184	0.000119174	0.00119387
Oxidation	P0C0L5	C4B	Complement C4-B	_ITPGKPYILTVPGHLDEM[Oxidation (M)]QLDIQAR_	_ITPGKPYILTVPGHLDEMQLDIQAR_	1	Zika	Dengue	170.797	0.139995	0.346484	-0.616556	0.125625	-0.96304	1.10366e-10	6.1915e-09
Hex	P01834	IGKC	Immunoglobulin kappa constant	_T[HexN]VAAPSVFIFPPSDEQLKSGTASVVC[Carbamidomethyl (C)]LLNNFYPREAK_	_TVAAPSVFIFPPSDEQLKSGTASVVC[Carbamidomethyl (C)]LLNNFYPREAK_	2	Zika	Dengue	31.5866	0.291092	1.26725	0.319903	0.222279	-0.947343	0.00274606	0.0163887
Oxidation	Q06033;Q06033-2	ITIH3	Inter-alpha-trypsin inhibitor heavy chain H3;Isoform 2 of Inter-alpha-trypsin inhibitor heavy chain H3	_SMEDKGM[Oxidation (M)]TNINDGLLR_	_SMEDKGMTNINDGLLR_	1	Zika	Dengue	34.8876	0.290228	0.00604689	-0.935467	-0.0203651	-0.941514	0.00264451	0.0158671
Carboxy	P02768	ALB	Serum albumin	_K[Carboxy]QTALVELVK_	_KQTALVELVK_	1	Zika	Dengue	99.8811	0.304328	0.395495	-0.546006	0.33179	-0.941501	0.00256944	0.0155833
Hex	P01023	A2M	Alpha-2-macroglobulin	_SKAIGY[Hex]LNTGYQR_	_SKAIGYLNTGYQR_	1	Zika	Dengue	33.6169	0.20619	-1.48998	-0.549019	-0.261861	0.940961	6.63409e-05	0.000702212
Oxidation	P0C0L5	C4B	Complement C4-B	_AEM[Oxidation (M)]ADQAAAWLTR_	_AEMADQAAAWLTR_	1	Zika	Dengue	17.3731	0.22596	0.207773	1.14392	0.125625	0.936152	0.000680443	0.00522916
Hex	P01859	IGHG2	Immunoglobulin heavy constant gamma 2	_VSNK[Hex]GLPAPIEK_	_VSNKGLPAPIEK_	1	Zika	Dengue	123.245	0.168162	-1.24687	-0.311627	0.291454	0.935246	1.58604e-07	3.78624e-06
Oxidation	P01011	SERPINA3	Alpha-1-antichymotrypsin	_WEM[Oxidation (M)]PFDPQDTHQSR_	_WEMPFDPQDTHQSR_	1	Zika	Dengue	25.3195	0.294588	-0.0905211	-1.02118	-0.245761	-0.930659	0.00410611	0.0228072
Oxidation	P00734	F2	Prothrombin	_ITDNM[Oxidation (M)]FC[Carbamidomethyl (C)]AGYKPDEGKR_	_ITDNMFC[Carbamidomethyl (C)]AGYKPDEGKR_	2	Zika	Dengue	81.8369	0.263629	0.157261	-0.76678	-0.0196258	-0.924041	0.000746808	0.00554913
Methyl	A0A0G2JMB2	IGHA2	Immunoglobulin heavy constant alpha 2 (Fragment)	_SGNTFR[Dimethyl (KR)]PEVHLLPPPSEELALNELVTLTC[Carbamidomethyl (C)]LAR_	_SGNTFRPEVHLLPPPSEELALNELVTLTC[Carbamidomethyl (C)]LAR_	2	Zika	Dengue	113.406	0.23918	-0.48798	0.432534	0.245022	0.920514	0.00019719	0.00182849
Hex	P01857	IGHG1	Immunoglobulin heavy constant gamma 1	_THTC[Carbamidomethyl (C)]PPC[Carbamidomethyl (C)]PAPELLGGPS[Hex]VFLFPPKPKDTLMISR_	_THTC[Carbamidomethyl (C)]PPC[Carbamidomethyl (C)]PAPELLGGPSVFLFPPKPKDTLMISR_	3	Zika	Dengue	89.5454	0.148236	-1.89903	-0.990194	0.0360262	0.908839	2.34516e-08	7.97354e-07
Oxidation	A0A075B6Q5	IGHV3-64	Immunoglobulin heavy variable 3-64	_NTLYLQM[Oxidation (M)]GSLR_	_NTLYLQMGSLR_	1	Zika	Dengue	23.9394	0.15974	0.70996	-0.190359	0.213234	-0.90032	9.76708e-06	0.00013046
Methyl	P06331	IGHV4-34	Immunoglobulin heavy variable 4-34	_SRVTISVDTSK[Methyl (KR)]NQFSLK_	_SRVTISVDTSKNQFSLK_	1	Zika	Dengue	46.5827	0.297997	-0.347744	-1.22105	0.290332	-0.873306	0.00525271	0.0270346
Oxidation	P05155;P05155-3	SERPING1	Plasma protease C1 inhibitor;Isoform 3 of Plasma protease C1 inhibitor	_VTTSQDMLSIM[Oxidation (M)]EK_	_VTTSQDMLSIMEK_	1	Zika	Dengue	11.0359	0.219059	0.221794	1.08172	0.113681	0.859922	0.00237023	0.0146121
Oxidation	P02647	APOA1	Apolipoprotein A-I	_VQPYLDDFQKKWQEEM[Oxidation (M)]ELYR_	_VQPYLDDFQKKWQEEMELYR_	1	Zika	Dengue	28.3054	0.230392	0.0853501	0.918995	0.446186	0.833645	0.00115718	0.00801453
Oxidation	P02768	ALB	Serum albumin	_DVC[Carbamidomethyl (C)]KNYAEAKDVFLGM[Oxidation (M)]FLYEYAR_	_DVC[Carbamidomethyl (C)]KNYAEAKDVFLGMFLYEYAR_	2	Zika	Dengue	108.803	0.314797	-0.067219	-0.894925	0.33179	-0.827706	0.00980316	0.0424677
Hex	P02768	ALB	Serum albumin	_LDELRDEGK[Hex]ASSAK_	_LDELRDEGKASSAK_	1	Zika	Dengue	193.454	0.12148	-1.17597	-0.355508	0.33179	0.820465	1.6494e-10	8.81249e-09
Methyl	P01619	IGKV3-20	Immunoglobulin kappa variable 3-20	_ATGIPDR[Methyl (KR)]FSGSGSGTDFTLTISR_	_ATGIPDRFSGSGSGTDFTLTISR_	1	Zika	Dengue	58.051	0.309664	-0.3049	-1.11301	0.249734	-0.808108	0.011513	0.0476663
Phospho	P02751;P02751-15;P02751-3;P02751-7	FN1	Fibronectin;Isoform 15 of Fibronectin;Isoform 3 of Fibronectin;Isoform 7 of Fibronectin	_TNTNVNC[Carbamidomethyl (C)]PIEC[Carbamidomethyl (C)]FMPLDVQADREDS[Phospho (STY)]RE_	_TNTNVNC[Carbamidomethyl (C)]PIEC[Carbamidomethyl (C)]FMPLDVQADREDSRE_	3	Zika	Dengue	150.621	0.10933	-0.871962	-0.0772529	-0.16791	0.794709	1.85525e-11	1.60122e-09
Oxidation	P01023	A2M	Alpha-2-macroglobulin	_M[Oxidation (M)]C[Carbamidomethyl (C)]PQLQQYEMHGPEGLR_	_MC[Carbamidomethyl (C)]PQLQQYEMHGPEGLR_	2	Zika	Dengue	216.626	0.183111	-0.202645	-0.986235	-0.261861	-0.78359	2.81748e-05	0.00034361
Oxidation	P01024	C3	Complement C3	_YYTYLIM[Oxidation (M)]NK_	_YYTYLIMNK_	1	Zika	Dengue	33.3085	0.241793	0.49733	1.27899	0.0304025	0.781656	0.00278144	0.016512
Oxidation	P00747	PLG	Plasminogen	_M[Oxidation (M)]RDVVLFEK_	_MRDVVLFEK_	1	Zika	Dengue	87.8346	0.254548	0.369243	-0.409082	0.151514	-0.778325	0.00296341	0.0173174
Methyl	A0A0B4J2D9;P0DP09	IGKV1D-13;IGKV1-13	Immunoglobulin kappa variable 1D-13;Immunoglobulin kappa variable 1-13	_LLIYDASSLESGVPSR[Methyl (KR)]_	_LLIYDASSLESGVPSR_	1	Zika	Dengue	206.308	0.215516	0.602154	-0.147267	0.615475	-0.749421	0.000617699	0.0048807
Oxidation	P19827	ITIH1	Inter-alpha-trypsin inhibitor heavy chain H1	_TM[Oxidation (M)]EQFTIHLTVNPQSK_	_TMEQFTIHLTVNPQSK_	1	Zika	Dengue	65.8265	0.235061	0.17972	-0.569083	0.173315	-0.748804	0.00221989	0.0137608
Methyl	A0A0B4J1V2	IGHV2-26	Immunoglobulin heavy variable 2-26	_MGVSWIR[Methyl (KR)]_	_MGVSWIR_	1	Zika	Dengue	56.9921	0.221186	0.560605	-0.186475	-0.00173199	-0.74708	0.00133574	0.00902831
Oxidation	P01023	A2M	Alpha-2-macroglobulin	_TGTHGLLVKQEDM[Oxidation (M)]K_	_TGTHGLLVKQEDMK_	1	Zika	Dengue	147.953	0.142753	-0.508795	-1.2555	-0.261861	-0.746707	5.70912e-07	1.12379e-05
Oxidation	P02652;V9GYM3	APOA2	Apolipoprotein A-II	_EPC[Carbamidomethyl (C)]VESLVSQYFQTVTDYGKDLM[Oxidation (M)]EK_	_EPC[Carbamidomethyl (C)]VESLVSQYFQTVTDYGKDLMEK_	2	Zika	Dengue	100.409	0.176048	0.339908	1.08554	0.23152	0.745629	5.07997e-05	0.000569972
Oxidation	P19823	ITIH2	Inter-alpha-trypsin inhibitor heavy chain H2	_SILQM[Oxidation (M)]SLDHHIVTPLTSLVIENEAGDER_	_SILQMSLDHHIVTPLTSLVIENEAGDER_	1	Zika	Dengue	158.431	0.208243	0.452493	-0.29251	0.0594793	-0.745003	0.0004607	0.0037457
Methyl	A0A0B4J1Y9	IGHV3-72	Immunoglobulin heavy variable 3-72	_GLEWVGR[Methyl (KR)]_	_GLEWVGR_	1	Zika	Dengue	208.245	0.28216	0.399389	-0.338165	-0.0647615	-0.737554	0.00960448	0.0419308
Oxidation	P08603	CFH	Complement factor H	_SPPEISHGVVAHM[Oxidation (M)]SDSYQYGEEVTYK_	_SPPEISHGVVAHMSDSYQYGEEVTYK_	1	Zika	Dengue	83.5862	0.195941	0.0720333	-0.657521	-0.00343657	-0.729554	0.000357128	0.00301277
Oxidation	P04114	APOB	Apolipoprotein B-100	_TLADLTLLDSPIKVPLLLSEPINIIDALEM[Oxidation (M)]R_	_TLADLTLLDSPIKVPLLLSEPINIIDALEMR_	1	Zika	Dengue	137.754	0.157531	-0.281649	0.444385	0.10691	0.726034	9.17336e-06	0.000125518
Oxidation	P01024	C3	Complement C3	_LESEETM[Oxidation (M)]VLEAHDAQGDVPVTVTVHDFPGK_	_LESEETMVLEAHDAQGDVPVTVTVHDFPGK_	1	Zika	Dengue	185.07	0.149755	0.15588	-0.568864	0.0304025	-0.724743	2.73521e-06	4.51309e-05
Oxidation	P02765	AHSG	Alpha-2-HS-glycoprotein	_HTFM[Oxidation (M)]GVVSLGSPS[Phospho (STY)]GEVSHPR_	_HTFMGVVSLGSPS[Phospho (STY)]GEVSHPR_	2	Zika	Dengue	112.582	0.124426	-0.197192	0.527286	0.0222724	0.724478	5.62612e-08	1.70608e-06
Oxidation	P02765	AHSG	Alpha-2-HS-glycoprotein	_HTFM[Oxidation (M)]GVVSLGSPSGEVSHPR_	_HTFMGVVSLGSPSGEVSHPR_	1	Zika	Dengue	179.585	0.0862409	-0.197955	0.524708	0.0222724	0.722663	1.51576e-14	2.12586e-12
Oxidation	P08603	CFH	Complement factor H	_IEGDEEM[Oxidation (M)]HC[Carbamidomethyl (C)]SDDGFWSK_	_IEGDEEMHC[Carbamidomethyl (C)]SDDGFWSK_	2	Zika	Dengue	25.75	0.219837	0.214967	0.930694	-0.00343657	0.715727	0.00324066	0.018457
Hex	P02768	ALB	Serum albumin	_LVNEVTEFAK[Hex]TC[Carbamidomethyl (C)]VADESAENC[Carbamidomethyl (C)]DK_	_LVNEVTEFAKTC[Carbamidomethyl (C)]VADESAENC[Carbamidomethyl (C)]DK_	3	Zika	Dengue	36.3552	0.245727	-1.32981	-0.624067	0.33179	0.705745	0.00679462	0.0327191
Oxidation	P02671	FGA	Fibrinogen alpha chain	_M[Oxidation (M)]ADEAGSEADHEGTHSTKR_	_MADEAGSEADHEGTHSTKR_	1	Zika	Dengue	84.3468	0.25295	-2.0102	-1.3062	-2.14754	0.703998	0.00664796	0.0322901
Methyl	A0A0B4J1X8	IGHV3-43	Immunoglobulin heavy variable 3-43	_DNSK[Methyl (KR)]NSLYLQMNSLR_	_DNSKNSLYLQMNSLR_	1	Zika	Dengue	234.874	0.077423	-0.408401	0.280795	-0.023575	0.689196	1.55111e-16	2.48621e-14
Oxidation	P04114	APOB	Apolipoprotein B-100	_M[Oxidation (M)]DMTFSK_	_MDMTFSK_	1	Zika	Dengue	15.657	0.158856	0.217911	0.905931	0.10691	0.68802	0.000593513	0.00472285
Methyl	P0DOY2	IGLC2	Immunoglobulin lambda constant 2	_AGVETTTPSK[Methyl (KR)]_	_AGVETTTPSK_	1	Zika	Dengue	19.1849	0.235763	-0.110597	0.576227	0.256241	0.686824	0.0089163	0.0401771
Oxidation	E9PFZ2	CP	Ceruloplasmin	_M[Oxidation (M)]YYSAVEPTKDIFTGLIGPMK_	_MYYSAVEPTKDIFTGLIGPMK_	1	Zika	Dengue	89.5488	0.249455	0.506889	-0.168066	-0.000816454	-0.674955	0.00816827	0.0374073
Oxidation	P00450	CP	Ceruloplasmin	_RDTANLFPQTSLTLHM[Oxidation (M)]WPDTEGTFNVEC[Carbamidomethyl (C)]LTTDHYTGGMK_	_RDTANLFPQTSLTLHMWPDTEGTFNVEC[Carbamidomethyl (C)]LTTDHYTGGMK_	2	Zika	Dengue	26.4591	0.2056	-0.0948783	-0.753035	-0.175658	-0.658157	0.00359254	0.0203577
Hex	P04196	HRG	Histidine-rich glycoprotein	_SSTTKPPFKPHGS[HexNAc]R_	_SSTTKPPFKPHGSR_	1	Zika	Dengue	27.7186	0.212706	0.392721	-0.256825	0.29361	-0.649546	0.00503463	0.0261521
Methyl	P01782	IGHV3-9	Immunoglobulin heavy variable 3-9	_DNAK[Methyl (KR)]NSLYLQMNSLR_	_DNAKNSLYLQMNSLR_	1	Zika	Dengue	210.043	0.0672476	-0.457838	0.186174	0.0224419	0.644013	2.95e-18	6.61979e-16
Hex	P02768	ALB	Serum albumin	_VTK[Hex]C[Carbamidomethyl (C)]C[Carbamidomethyl (C)]TESLVNR_	_VTKC[Carbamidomethyl (C)]C[Carbamidomethyl (C)]TESLVNR_	3	Zika	Dengue	146.398	0.139145	0.145867	-0.497516	0.33179	-0.643383	8.2253e-06	0.00011536
Oxidation	P02763	ORM1	Alpha-1-acid glycoprotein 1	_TYM[Oxidation (M)]LAFDVNDEKNWGLSVYADKPETTK_	_TYMLAFDVNDEKNWGLSVYADKPETTK_	1	Zika	Dengue	110.569	0.218428	0.185363	-0.447035	-0.0316811	-0.632398	0.00457076	0.0244209
Oxidation	P08603	CFH	Complement factor H	_SC[Carbamidomethyl (C)]DIPVFM[Oxidation (M)]NAR_	_SC[Carbamidomethyl (C)]DIPVFMNAR_	2	Zika	Dengue	148.658	0.135836	-0.293952	-0.92397	-0.00343657	-0.630018	7.67076e-06	0.000110341
Hex	P02768	ALB	Serum albumin	_AEFAEVSK[Hex]LVTDLTK_	_AEFAEVSKLVTDLTK_	1	Zika	Dengue	122.798	0.206419	-0.286458	0.334532	0.33179	0.62099	0.00319083	0.0182659
Oxidation	P02647	APOA1	Apolipoprotein A-I	_WQEEM[Oxidation (M)]ELYR_	_WQEEMELYR_	1	Zika	Dengue	115.575	0.18445	0.580476	1.20007	0.446186	0.619593	0.00106118	0.00753573
Phospho	P02768	ALB	Serum albumin	_S[Phospho (STY)]LHTLFGDKLC[Carbamidomethyl (C)]TVATLR_	_SLHTLFGDKLC[Carbamidomethyl (C)]TVATLR_	2	Zika	Dengue	122.236	0.216021	0.414188	-0.202751	0.33179	-0.616939	0.00504529	0.0260867
Oxidation	P04004	VTN	Vitronectin	_IYISGM[Oxidation (M)]APR_	_IYISGMAPR_	1	Zika	Dengue	68.7646	0.141924	0.457669	-0.139405	-0.254438	-0.597074	7.7532e-05	0.000812999
Methyl	A0A0J9YX35	IGHV3-64D	Immunoglobulin heavy variable 3-64D	_NTLYLQMSSLR[Methyl (KR)]_	_NTLYLQMSSLR_	1	Zika	Dengue	122.702	0.154876	0.6746	0.0807327	0.349659	-0.593867	0.000200517	0.00181436
Methyl	P04433	IGKV3-11	Immunoglobulin kappa variable 3-11	_LLIYDASNR[Methyl (KR)]_	_LLIYDASNR_	1	Zika	Dengue	108.208	0.174194	0.30449	-0.280571	0.154397	-0.58506	0.00108271	0.00759253
Oxidation	P0C0L5	C4B	Complement C4-B	_GC[Carbamidomethyl (C)]GEQTM[Oxidation (M)]IYLAPTLAASR_	_GC[Carbamidomethyl (C)]GEQTMIYLAPTLAASR_	2	Zika	Dengue	32.7421	0.137343	0.361265	-0.219659	0.125625	-0.580923	0.000182901	0.00181606
Oxidation	A0A096LPE2	SAA2-SAA4	SAA2-SAA4 readthrough	_AYWDIM[Oxidation (M)]ISNHQNSNR_	_AYWDIMISNHQNSNR_	1	Zika	Dengue	17.967	0.166695	0.573011	1.14825	0.215801	0.575237	0.00305258	0.0177461
Oxidation	P04196	HRG	Histidine-rich glycoprotein	_SGFPQVSM[Oxidation (M)]FFTHTFPK_	_SGFPQVSMFFTHTFPK_	1	Zika	Dengue	8.03949	0.119327	0.299292	0.872685	0.29361	0.573393	0.00134652	0.00904669
Oxidation	P19827	ITIH1	Inter-alpha-trypsin inhibitor heavy chain H1	_GM[Oxidation (M)]ADQDGLKPTIDKPSEDSPPLEMLGPR_	_GMADQDGLKPTIDKPSEDSPPLEMLGPR_	1	Zika	Dengue	160.072	0.16619	0.00893269	-0.564392	0.173315	-0.573325	0.000717345	0.00543825
Hex	P02768	ALB	Serum albumin	_SHC[Carbamidomethyl (C)]IAEVENDEMPADLPS[Hex]LAADFVESKDVC[Carbamidomethyl (C)]K_	_SHC[Carbamidomethyl (C)]IAEVENDEMPADLPSLAADFVESKDVC[Carbamidomethyl (C)]K_	3	Zika	Dengue	174.713	0.1433	-0.378623	0.190172	0.33179	0.568794	0.000105305	0.001094
Hex	P0DOY2	IGLC2	Immunoglobulin lambda constant 2	_ADSSPVK[Hex]AGVETTTPSK_	_ADSSPVKAGVETTTPSK_	1	Zika	Dengue	42.2855	0.133239	-0.215871	0.352583	0.256241	0.568454	0.000110498	0.00113742
Oxidation	P01859	IGHG2	Immunoglobulin heavy constant gamma 2	_TTPPM[Oxidation (M)]LDSDGSFFLYSK_	_TTPPMLDSDGSFFLYSK_	1	Zika	Dengue	217.021	0.20083	0.448805	-0.112203	0.291454	-0.561009	0.00568121	0.0285844
Oxidation	P01009	SERPINA1	Alpha-1-antitrypsin	_SPLFM[Oxidation (M)]GK_	_SPLFMGK_	1	Zika	Dengue	228.922	0.150606	0.143268	-0.414753	0.0633371	-0.558021	0.000265136	0.00230607
Methyl	P01704	IGLV2-14	Immunoglobulin lambda variable 2-14	_LMIYEVSNR[Methyl (KR)]PSGVSNR_	_LMIYEVSNRPSGVSNR_	1	Zika	Dengue	103.131	0.215959	0.207926	0.764186	0.335701	0.556259	0.0114206	0.0474589
Oxidation	P04003	C4BPA	C4b-binding protein alpha chain	_KPDVSHGEM[Oxidation (M)]VSGFGPIYNYKDTIVFK_	_KPDVSHGEMVSGFGPIYNYKDTIVFK_	1	Zika	Dengue	48.9051	0.178637	0.116506	0.662937	-0.273775	0.546431	0.00362832	0.0203549
Oxidation	P01023	A2M	Alpha-2-macroglobulin	_AFQPFFVELTM[Oxidation (M)]PYSVIR_	_AFQPFFVELTMPYSVIR_	1	Zika	Dengue	132.782	0.205122	0.0381366	-0.506333	-0.261861	-0.544469	0.00892271	0.0400451
Oxidation	P02787	TF	Serotransferrin	_KDSGFQM[Oxidation (M)]NQLR_	_KDSGFQMNQLR_	1	Zika	Dengue	92.526	0.160215	-0.0148744	-0.549552	0.214172	-0.534678	0.00122213	0.00836116
Oxidation	P01857	IGHG1	Immunoglobulin heavy constant gamma 1	_DTLM[Oxidation (M)]ISR_	_DTLMISR_	1	Zika	Dengue	164.427	0.127397	0.0509923	-0.482314	0.0360262	-0.533307	4.61643e-05	0.000523196
Oxidation	P02787	TF	Serotransferrin	_LC[Carbamidomethyl (C)]M[Oxidation (M)]GSGLNLC[Carbamidomethyl (C)]EPNNKEGYYGYTGAFR_	_LC[Carbamidomethyl (C)]MGSGLNLC[Carbamidomethyl (C)]EPNNKEGYYGYTGAFR_	3	Zika	Dengue	155.716	0.138165	-0.00507262	-0.532745	0.214172	-0.527672	0.000193292	0.00180728
Oxidation	P01024	C3	Complement C3	_ILLQGTPVAQM[Oxidation (M)]TEDAVDAERLK_	_ILLQGTPVAQMTEDAVDAERLK_	1	Zika	Dengue	143.241	0.137177	-0.315078	0.211326	0.0304025	0.526404	0.000186023	0.00179929
Hex	P02768	ALB	Serum albumin	_ALVLIAFAQY[Hex]LQQC[Carbamidomethyl (C)]PFEDHVKLVNEVTEFAK_	_ALVLIAFAQYLQQC[Carbamidomethyl (C)]PFEDHVKLVNEVTEFAK_	2	Zika	Dengue	90.7897	0.190563	0.170506	0.69583	0.33179	0.525325	0.00706881	0.0333244
Methyl	A0A075B6K4	IGLV3-10	Immunoglobulin lambda variable 3-10	_ITC[Carbamidomethyl (C)]SGDALPK[Dimethyl (KR)]_	_ITC[Carbamidomethyl (C)]SGDALPK_	2	Zika	Dengue	106.485	0.195716	-0.295685	0.209535	-0.0848924	0.50522	0.0112066	0.0469171
Oxidation	P10909;P10909-2;P10909-4;P10909-5	CLU	Clusterin;Isoform 2 of Clusterin;Isoform 4 of Clusterin;Isoform 5 of Clusterin	_FM[Oxidation (M)]ETVAEK_	_FMETVAEK_	1	Zika	Dengue	112.664	0.120204	0.333162	-0.168386	0.202162	-0.501548	5.97405e-05	0.000657145
Oxidation	P08603	CFH	Complement factor H	_AQTTVTC[Carbamidomethyl (C)]M[Oxidation (M)]ENGWSPTPR_	_AQTTVTC[Carbamidomethyl (C)]MENGWSPTPR_	2	Zika	Dengue	162.057	0.108014	-0.165504	-0.661579	-0.00343657	-0.496076	8.74458e-06	0.000121129
Oxidation	P02768	ALB	Serum albumin	_SHC[Carbamidomethyl (C)]IAEVENDEM[Oxidation (M)]PADLPSLAADFVESK_	_SHC[Carbamidomethyl (C)]IAEVENDEMPADLPSLAADFVESK_	2	Zika	Dengue	226.767	0.0940269	0.570645	0.0745852	0.33179	-0.49606	3.09301e-07	6.80462e-06
Methyl	A0A0B4J2D9;P0DP09	IGKV1D-13;IGKV1-13	Immunoglobulin kappa variable 1D-13;Immunoglobulin kappa variable 1-13	_LLIYDASSLESGVPSR[Dimethyl (KR)]_	_LLIYDASSLESGVPSR_	1	Zika	Dengue	219.395	0.115666	0.602154	0.110603	0.615475	-0.491551	3.16696e-05	0.000382079
Hex	P02787	TF	Serotransferrin	_K[Hex]ASYLDC[Carbamidomethyl (C)]IR_	_KASYLDC[Carbamidomethyl (C)]IR_	2	Zika	Dengue	99.2739	0.149728	-0.267258	-0.756669	0.214172	-0.489411	0.0014864	0.00975287
Methyl	P0DOY2	IGLC2	Immunoglobulin lambda constant 2	_ATLVC[Carbamidomethyl (C)]LISDFYPGAVTVAWK[Dimethyl (KR)]_	_ATLVC[Carbamidomethyl (C)]LISDFYPGAVTVAWK_	2	Zika	Dengue	62.555	0.154367	0.149063	-0.339261	0.256241	-0.488324	0.00241546	0.0147291
Oxidation	P00450	CP	Ceruloplasmin	_ADDKVYPGEQYTYM[Oxidation (M)]LLATEEQSPGEGDGNC[Carbamidomethyl (C)]VTR_	_ADDKVYPGEQYTYMLLATEEQSPGEGDGNC[Carbamidomethyl (C)]VTR_	2	Zika	Dengue	125.085	0.172401	0.0107278	-0.47663	-0.175658	-0.487358	0.00547493	0.0277958
Oxidation	P04114	APOB	Apolipoprotein B-100	_LAAYLM[Oxidation (M)]LMR_	_LAAYLMLMR_	1	Zika	Dengue	44.2086	0.174837	0.584139	1.07145	0.10691	0.487309	0.00781946	0.0361047
Methyl	A0A0C4DH35	IGHV3-35	Immunoglobulin heavy variable 3-35 (non-functional) (Fragment)	_AEDTAVYYC[Carbamidomethyl (C)]VR[Methyl (KR)]_	_AEDTAVYYC[Carbamidomethyl (C)]VR_	2	Zika	Dengue	52.4961	0.177431	-0.14464	0.340187	-0.218973	0.484828	0.00856779	0.0390775
Oxidation	P01024	C3	Complement C3	_LM[Oxidation (M)]NIFLK_	_LMNIFLK_	1	Zika	Dengue	167.205	0.126329	0.548303	0.0657148	0.0304025	-0.482588	0.000187848	0.00177114
Hex	P04114	APOB	Apolipoprotein B-100	_IK[Hex]GVISIPR_	_IKGVISIPR_	1	Zika	Dengue	14.838	0.148458	0.0504712	0.530108	0.10691	0.479637	0.00603918	0.0297191
Oxidation	P01023	A2M	Alpha-2-macroglobulin	_QEDM[Oxidation (M)]KGHFSISIPVKSDIAPVAR_	_QEDMKGHFSISIPVKSDIAPVAR_	1	Zika	Dengue	125.723	0.15029	0.473466	-0.00318901	-0.261861	-0.476655	0.00190769	0.0120928
Oxidation	P08603	CFH	Complement factor H	_C[Carbamidomethyl (C)]NM[Oxidation (M)]GYEYSER_	_C[Carbamidomethyl (C)]NMGYEYSER_	2	Zika	Dengue	74.8394	0.167031	0.225171	-0.247451	-0.00343657	-0.472622	0.00599647	0.029639
Oxidation	P01782	IGHV3-9	Immunoglobulin heavy variable 3-9	_LSC[Carbamidomethyl (C)]AASGFTFDDYAM[Oxidation (M)]HWVR_	_LSC[Carbamidomethyl (C)]AASGFTFDDYAMHWVR_	2	Zika	Dengue	106.109	0.150675	-0.454278	0.0054701	0.0224419	0.459748	0.00287978	0.0169168
Methyl	P01706	IGLV2-11	Immunoglobulin lambda variable 2-11	_LMIYDVSK[Methyl (KR)]_	_LMIYDVSK_	1	Zika	Dengue	214.966	0.120454	0.300694	-0.157301	0.282854	-0.457994	0.000187019	0.00177827
Phospho	P01042	KNG1	Kininogen-1	_ETTC[Carbamidomethyl (C)]SKES[Phospho (STY)]NEELTESC[Carbamidomethyl (C)]ETK_	_ETTC[Carbamidomethyl (C)]SKESNEELTESC[Carbamidomethyl (C)]ETK_	3	Zika	Dengue	230.956	0.0888236	-0.636831	-0.18458	0.15398	0.452251	7.38691e-07	1.35871e-05
Methyl	A0A0C4DH68	IGKV2-24	Immunoglobulin kappa variable 2-24	_FSGSGAGTDFTLK[Methyl (KR)]_	_FSGSGAGTDFTLK_	1	Zika	Dengue	41.2703	0.168979	0.285678	-0.16653	0.366434	-0.452208	0.0106569	0.0451208
Hex	P02768	ALB	Serum albumin	_KQT[Hex]ALVELVK_	_KQTALVELVK_	1	Zika	Dengue	122.645	0.104688	0.302716	-0.14619	0.33179	-0.448906	3.62629e-05	0.000423822
Oxidation	P0C0L5	C4B	Complement C4-B	_KKEVYM[Oxidation (M)]PSSIFQDDFVIPDISEPGTWK_	_KKEVYMPSSIFQDDFVIPDISEPGTWK_	1	Zika	Dengue	164.063	0.163666	0.0538158	-0.392908	0.125625	-0.446724	0.00703605	0.033451
Methyl	P0DOY2	IGLC2	Immunoglobulin lambda constant 2	_QSNNK[Dimethyl (KR)]YAASSYLSLTPEQWK_	_QSNNKYAASSYLSLTPEQWK_	1	Zika	Dengue	216.598	0.153055	0.0562719	-0.388208	0.256241	-0.44448	0.00406622	0.022698
Methyl	P08603	CFH	Complement factor H	_SLGNVIMVC[Carbamidomethyl (C)]R[Methyl (KR)]_	_SLGNVIMVC[Carbamidomethyl (C)]R_	2	Zika	Dengue	139.712	0.0900206	0.0204009	0.463666	-0.00343657	0.443265	2.36879e-06	3.96685e-05
Methyl	P01705	IGLV2-23	Immunoglobulin lambda variable 2-23	_LMIYEGSK[Methyl (KR)]_	_LMIYEGSK_	1	Zika	Dengue	100.728	0.143454	-0.328669	0.10602	-0.552645	0.434689	0.00311136	0.0179946
Oxidation	P00450	CP	Ceruloplasmin	_MYYSAVDPTKDIFTGLIGPM[Oxidation (M)]K_	_MYYSAVDPTKDIFTGLIGPMK_	1	Zika	Dengue	168.088	0.101433	0.150778	-0.282436	-0.175658	-0.433214	3.24945e-05	0.00038786
Oxidation	P01871	IGHM	Immunoglobulin heavy constant mu	_ESATITC[Carbamidomethyl (C)]LVTGFSPADVFVQWM[Oxidation (M)]QR_	_ESATITC[Carbamidomethyl (C)]LVTGFSPADVFVQWMQR_	2	Zika	Dengue	98.0123	0.157138	-0.0218083	0.406722	0.168447	0.42853	0.00757154	0.0353969
Oxidation	P02768	ALB	Serum albumin	_AVM[Oxidation (M)]DDFAAFVEK_	_AVMDDFAAFVEK_	1	Zika	Dengue	165.641	0.0876892	0.141727	0.566707	0.33179	0.424979	2.88159e-06	4.61878e-05
Methyl	P01701	IGLV1-51	Immunoglobulin lambda variable 1-51	_LLIYDNNK[Methyl (KR)]RPSGIPDR_	_LLIYDNNKRPSGIPDR_	1	Zika	Dengue	56.6838	0.151089	0.160509	0.583347	-0.106604	0.422838	0.00702626	0.0335466
Methyl	A0A0C4DH38	IGHV5-51	Immunoglobulin heavy variable 5-51	_ASDTAMYYC[Carbamidomethyl (C)]AR[Dimethyl (KR)]_	_ASDTAMYYC[Carbamidomethyl (C)]AR_	2	Zika	Dengue	134.393	0.144379	-0.0879104	-0.508863	0.117307	-0.420953	0.0041625	0.0228937
Oxidation	P02787	TF	Serotransferrin	_M[Oxidation (M)]YLGYEYVTAIR_	_MYLGYEYVTAIR_	1	Zika	Dengue	176.038	0.110765	0.401005	-0.0197579	0.214172	-0.420763	0.000200108	0.00182537
Oxidation	P01009	SERPINA1	Alpha-1-antitrypsin	_LSSWVLLM[Oxidation (M)]K_	_LSSWVLLMK_	1	Zika	Dengue	99.8773	0.135401	0.0950517	0.513199	0.0633371	0.418147	0.00261298	0.0157622
Oxidation	P01023	A2M	Alpha-2-macroglobulin	_VGFYESDVM[Oxidation (M)]GR_	_VGFYESDVMGR_	1	Zika	Dengue	232.293	0.109595	0.00313173	-0.413314	-0.261861	-0.416446	0.000185019	0.00182097
Phospho	P02768	ALB	Serum albumin	_TC[Carbamidomethyl (C)]VADES[Phospho (STY)]AENC[Carbamidomethyl (C)]DK_	_TC[Carbamidomethyl (C)]VADESAENC[Carbamidomethyl (C)]DK_	3	Zika	Dengue	181.125	0.0639446	-0.478776	-0.0657238	0.33179	0.413052	9.40098e-10	4.39496e-08
Methyl	P01619	IGKV3-20	Immunoglobulin kappa variable 3-20	_LLIYGASSR[Dimethyl (KR)]_	_LLIYGASSR_	1	Zika	Dengue	196.865	0.0733791	0.162009	-0.246918	0.249734	-0.408927	8.21118e-08	2.24706e-06
Hex	P02768	ALB	Serum albumin	_FPK[Hex]AEFAEVSK_	_FPKAEFAEVSK_	1	Zika	Dengue	102.064	0.156443	-0.165454	0.23764	0.33179	0.403094	0.0114082	0.0475835
Oxidation	P02768	ALB	Serum albumin	_DVFLGM[Oxidation (M)]FLYEYAR_	_DVFLGMFLYEYAR_	1	Zika	Dengue	223.588	0.139891	0.366994	-0.0324515	0.33179	-0.399445	0.00470387	0.0247781
Methyl	P06331	IGHV4-34	Immunoglobulin heavy variable 4-34	_SRVTISVDTSK[Methyl (KR)]_	_SRVTISVDTSK_	1	Zika	Dengue	56.3729	0.1482	-0.109917	0.283171	0.290332	0.393089	0.0103774	0.0441041
Methyl	P01619	IGKV3-20	Immunoglobulin kappa variable 3-20	_ASQSVSSSYLAWYQQK[Methyl (KR)]PGQAPR_	_ASQSVSSSYLAWYQQKPGQAPR_	1	Zika	Dengue	166.853	0.0970964	-0.149117	-0.53353	0.249734	-0.384413	0.000111389	0.00113617
Oxidation	P01871	IGHM	Immunoglobulin heavy constant mu	_YAATSQVLLPSKDVM[Oxidation (M)]QGTDEHVVC[Carbamidomethyl (C)]K_	_YAATSQVLLPSKDVMQGTDEHVVC[Carbamidomethyl (C)]K_	2	Zika	Dengue	207.984	0.1118	-0.382549	-0.00389143	0.168447	0.378658	0.000845838	0.00616253
Methyl	P06331	IGHV4-34	Immunoglobulin heavy variable 4-34	_VTISVDTSK[Methyl (KR)]NQFSLK_	_VTISVDTSKNQFSLK_	1	Zika	Dengue	95.5608	0.136344	-0.115864	0.261672	0.290332	0.377536	0.00676205	0.0327027
Methyl	P23083	IGHV1-2	Immunoglobulin heavy variable 1-2	_DTSISTAYMELSR[Dimethyl (KR)]_	_DTSISTAYMELSR_	1	Zika	Dengue	22.5726	0.12345	-0.234104	0.130087	-0.270802	0.36419	0.00740095	0.0347442
Hex	P02768	ALB	Serum albumin	_AEFAEVS[Hex]KLVTDLTK_	_AEFAEVSKLVTDLTK_	1	Zika	Dengue	216.855	0.124287	-0.286458	0.070002	0.33179	0.35646	0.00453975	0.0243713
Oxidation	P00747	PLG	Plasminogen	_TPENYPNAGLTM[Oxidation (M)]NYC[Carbamidomethyl (C)]R_	_TPENYPNAGLTMNYC[Carbamidomethyl (C)]R_	2	Zika	Dengue	211.992	0.0693393	0.167278	-0.187554	0.151514	-0.354832	6.95614e-07	1.3008e-05
Oxidation	P01023	A2M	Alpha-2-macroglobulin	_SASNM[Oxidation (M)]AIVDVK_	_SASNMAIVDVK_	1	Zika	Dengue	237.995	0.0701703	0.0761444	-0.276981	-0.261861	-0.353125	9.57901e-07	1.70598e-05
Methyl	P01624	IGKV3-15	Immunoglobulin kappa variable 3-15	_LLIYGASTR[Methyl (KR)]_	_LLIYGASTR_	1	Zika	Dengue	210.939	0.102342	0.0947237	0.447701	0.0486978	0.352977	0.000679877	0.00526084
Oxidation	P01860	IGHG3	Immunoglobulin heavy constant gamma 3	_EPQVYTLPPSREEM[Oxidation (M)]TK_	_EPQVYTLPPSREEMTK_	1	Zika	Dengue	158.608	0.134703	0.390826	0.740448	-0.270957	0.349621	0.0103354	0.0442607
Oxidation	P02768	ALB	Serum albumin	_NYAEAKDVFLGM[Oxidation (M)]FLYEYAR_	_NYAEAKDVFLGMFLYEYAR_	1	Zika	Dengue	218.994	0.130126	-0.30965	0.0387132	0.33179	0.348363	0.00799064	0.0367439
Methyl	A0A087X0Q4	IGKV2-40	Immunoglobulin kappa variable 2-40	_FSGSGSGTDFTLK[Methyl (KR)]_	_FSGSGSGTDFTLK_	1	Zika	Dengue	209.713	0.0959508	0.441232	0.0954666	0.230841	-0.345765	0.000392345	0.00326082
Methyl	A0A075B6I0	IGLV8-61	Immunoglobulin lambda variable 8-61	_TLIYSTNTR[Methyl (KR)]_	_TLIYSTNTR_	1	Zika	Dengue	154.929	0.128179	-0.543614	-0.197883	-0.478956	0.345732	0.0077703	0.0361754
Hex	P01834	IGKC	Immunoglobulin kappa constant	_TVAAPS[Hex]VFIFPPSDEQLKSGTASVVC[Carbamidomethyl (C)]LLNNFYPR_	_TVAAPSVFIFPPSDEQLKSGTASVVC[Carbamidomethyl (C)]LLNNFYPR_	2	Zika	Dengue	196.02	0.122402	-0.288739	0.0546879	0.222279	0.343427	0.00552637	0.0279306
Oxidation	P01782	IGHV3-9	Immunoglobulin heavy variable 3-9	_NSLYLQM[Oxidation (M)]NSLR_	_NSLYLQMNSLR_	1	Zika	Dengue	196.581	0.123082	-0.0630381	-0.388797	0.0224419	-0.325759	0.00878923	0.0397642
Oxidation	P19827	ITIH1	Inter-alpha-trypsin inhibitor heavy chain H1	_NHM[Oxidation (M)]QYEIVIK_	_NHMQYEIVIK_	1	Zika	Dengue	96.858	0.125059	-0.0983317	-0.424003	0.173315	-0.325671	0.0106734	0.0450208
Carboxy	A0A0C4DH36	IGHV3-38	Immunoglobulin heavy variable 3-38 (non-functional) (Fragment)	_AE[Carboxy]GTAVYYC[Carbamidomethyl (C)]AR_	_AEGTAVYYC[Carbamidomethyl (C)]AR_	2	Zika	Dengue	239.711	0.0873095	-0.404721	-0.0889225	0.0430065	0.315798	0.000363576	0.00304427
Phospho	P00450	CP	Ceruloplasmin	_FNKNNEGT[Phospho (STY)]YYSPNYNPQSR_	_FNKNNEGTYYSPNYNPQSR_	1	Zika	Dengue	89.1273	0.0867491	-0.317065	-0.0119474	-0.175658	0.305117	0.000688812	0.00525746
Oxidation	P01009	SERPINA1	Alpha-1-antitrypsin	_RLGM[Oxidation (M)]FNIQHC[Carbamidomethyl (C)]K_	_RLGMFNIQHC[Carbamidomethyl (C)]K_	2	Zika	Dengue	216.934	0.113101	-0.460497	-0.75855	0.0633371	-0.298052	0.00901599	0.0403025
Oxidation	P08603	CFH	Complement factor H	_IVSSAM[Oxidation (M)]EPDREYHFGQAVR_	_IVSSAMEPDREYHFGQAVR_	1	Zika	Dengue	201.262	0.0937567	0.153397	-0.13481	-0.00343657	-0.288207	0.00240545	0.0147482
Methyl	A0A0J9YVT0;P0DP02	IGHV3-33;IGHV3-30-3	Immunoglobulin heavy variable 3-33 (Fragment);Immunoglobulin heavy variable 3-30-3	_AEDTAVYYC[Carbamidomethyl (C)]AR[Methyl (KR)]_	_AEDTAVYYC[Carbamidomethyl (C)]AR_	2	Zika	Dengue	207.192	0.0715849	-0.0229588	-0.290191	-0.220551	-0.267232	0.000244422	0.00214251
Methyl	P01699	IGLV1-44	Immunoglobulin lambda variable 1-44	_LLIYSNNQR[Methyl (KR)]PSGVPDR_	_LLIYSNNQRPSGVPDR_	1	Zika	Dengue	143.625	0.0911368	0.418498	0.152908	0.0944265	-0.26559	0.00414033	0.022884
Methyl	P01624	IGKV3-15	Immunoglobulin kappa variable 3-15	_ASQSVSSNLAWYQQK[Methyl (KR)]PGQAPR_	_ASQSVSSNLAWYQQKPGQAPR_	1	Zika	Dengue	204.973	0.0713247	-0.0523438	0.208821	0.0486978	0.261165	0.000319285	0.00271392
Oxidation	P01024	C3	Complement C3	_SGQSEDRQPVPGQQM[Oxidation (M)]TLK_	_SGQSEDRQPVPGQQMTLK_	1	Zika	Dengue	203.002	0.063678	0.147993	-0.094448	0.0304025	-0.242441	0.000186043	0.00178411
Oxidation	P02768	ALB	Serum albumin	_ETYGEM[Oxidation (M)]ADC[Carbamidomethyl (C)]C[Carbamidomethyl (C)]AK_	_ETYGEMADC[Carbamidomethyl (C)]C[Carbamidomethyl (C)]AK_	3	Zika	Dengue	196.88	0.0727104	0.070157	-0.169158	0.33179	-0.239316	0.00118251	0.00813971
Oxidation	P02787	TF	Serotransferrin	_DSGFQM[Oxidation (M)]NQLR_	_DSGFQMNQLR_	1	Zika	Dengue	215.418	0.0624486	-0.0843656	0.118148	0.214172	0.202514	0.00137173	0.00910697
Hex	P02768	ALB	Serum albumin	_K[Hex]QTALVELVK_	_KQTALVELVK_	1	Zika	Dengue	213.739	0.0721754	0.302716	0.108877	0.33179	-0.193839	0.00780888	0.0362048
Methyl	A0A0J9YVT0;P0DP02	IGHV3-33;IGHV3-30-3	Immunoglobulin heavy variable 3-33 (Fragment);Immunoglobulin heavy variable 3-30-3	_NTLYLQMNSLR[Methyl (KR)]_	_NTLYLQMNSLR_	1	Zika	Dengue	168.031	0.0739979	0.239463	0.431609	-0.220551	0.192146	0.0102487	0.0440575

## Sheet: Table_S3
Table S3: C-linked glycosylation with consensus sequence Trp-X-X-Trp.
Protein Descriptions	UniProt ID	Precursor ID	Residue	Dengue present	Zika present
Complement component C6	P13671	_SNAVDGQW[Hex]GC[Carbamidomethyl (C)]WSSWSTC[Carbamidomethyl (C)]DATYKR	568	0	1
Complement component C8 beta chain	P07358	_WNC[Carbamidomethyl (C)]W[Hex]SNWSSC[Carbamidomethyl (C)]SGR	551	24	26
Complement component C9	P02748	_MSPW[Hex]SEWSQC[Carbamidomethyl (C)]DPC[Carbamidomethyl (C)]LR	48	68	54
Complement component C9	P02748	_MSPWSEW[Hex]SQC[Carbamidomethyl (C)]DPC[Carbamidomethyl (C)]LR	51	2	4
Immunoglobulin kappa variable 1-12 / 1D-12	A0A0C4DH73; P01611	_ASQGISSW[HexN]LAWYQQKPGK	54	22	14
