# Supplementary material for: Re-mining serum proteomics data reveals extensive post-translational modifications upon Zika and dengue infection
Source: Royal Society of Chemistry journal article supplement (doi:10.1039/d2mo00258b), 2023-02-15
Supplement: d2mo00258b3.xlsx [file d2mo00258b3.xlsx]

## Sheet: 200708_Zika_PTM_Carboxy_HTRMS_c
Comparison (group1/group2)	Group	ProteinGroups	AVG Log2 Ratio	Absolute AVG Log2 Ratio	Pvalue	Qvalue	# of Ratios	UniProtIds	Genes	ProteinDescriptions	ProteinNames	# Unique Total Peptides	% Change	Ratio	Condition Numerator	Condition Denominator	GO Cellular Component	GO Molecular Function	GO Biological Process	Degrees Of Freedom	Standard Error
Dengue / QC	_DVDKEFYLFPTVFDENESLLLEDNIR_	P00450	1.64446	1.64446	1.47555e-46	4.34107e-43	168	P00450	CP	Ceruloplasmin	CERU_HUMAN	1	212.63	3.1263	Dengue	QC	NaN	NaN	NaN	163.957	0.0799073
Dengue / QC	_VEKFDLVPVPTNLYGDFFTGDAYVILK_	P06396	1.60276	1.60276	4.25526e-46	8.34599e-43	156	P06396	GSN	Gelsolin	GELS_HUMAN	1	203.723	3.03723	Dengue	QC	NaN	NaN	NaN	148.422	0.0733842
Dengue / QC	_YSQPEDSLIPFFEITVPESQLTVSQFTLPK_	P04114	1.23773	1.23773	2.23658e-39	1.88001e-36	170	P04114	APOB	Apolipoprotein B-100	APOB_HUMAN	1	135.828	2.35828	Dengue	QC	NaN	NaN	NaN	126.496	0.0653921
Dengue / QC	_AVYTC[Carbamidomethyl (C)]NEGYQLLGEINYREC[Carbamidomethyl (C)]DTDGWTNDIPIC[Carbamidomethyl (C)]EVVK_	P08603	-0.520644	0.520644	4.61154e-39	3.01492e-36	54	P08603	CFH	Complement factor H	CFAH_HUMAN	1	-30.2939	0.697061	Dengue	QC	NaN	NaN	NaN	39.9025	0.128769
Dengue / QC	_FFESFGDLSTPDAVM[Oxidation (M)]GNPK_	P68871	0.832077	0.832077	7.69301e-37	4.11506e-34	90	P68871	HBB	Hemoglobin subunit beta	HBB_HUMAN	1	78.0247	1.78025	Dengue	QC	NaN	NaN	NaN	81.0375	0.0388965
Dengue / QC	_TIDQMLNSELQWPVPDIYLR_	P04114	1.15014	1.15014	4.62187e-36	2.26626e-33	112	P04114	APOB	Apolipoprotein B-100	APOB_HUMAN	1	121.936	2.21936	Dengue	QC	NaN	NaN	NaN	101.222	0.0642953
Dengue / QC	_AKSPPTMVDSLLAVTLAGNLGLTFLR_	Q96PD5	1.70197	1.70197	1.48986e-34	4.87019e-32	132	Q96PD5	PGLYRP2	N-acetylmuramoyl-L-alanine amidase	PGRP2_HUMAN	1	225.344	3.25344	Dengue	QC	NaN	NaN	NaN	124.786	0.0984469
Dengue / QC	_RIHEDSDSALQLQDFYQEVANPLLTAVTFEYPSNAVEEVTQNNFR_	Q14624	1.38984	1.38984	1.33447e-33	3.68847e-31	168	Q14624	ITIH4	Inter-alpha-trypsin inhibitor heavy chain H4	ITIH4_HUMAN	1	162.05	2.6205	Dengue	QC	NaN	NaN	NaN	137.174	0.0881858
Dengue / QC	_LYLKHQMDLVATLSQLGLQELFQAPDLR_	P08697	1.72492	1.72492	1.56179e-33	3.99547e-31	162	P08697	SERPINF2	Alpha-2-antiplasmin	A2AP_HUMAN	1	230.562	3.30562	Dengue	QC	NaN	NaN	NaN	148.827	0.10262
Dengue / QC	_GAVYVYFGSK_	P80108	1.69542	1.69542	2.04723e-33	5.01914e-31	72	P80108	GPLD1	Phosphatidylinositol-glycan-specific phospholipase D	PHLD_HUMAN	1	223.872	3.23872	Dengue	QC	NaN	NaN	NaN	56.5259	0.108744
Dengue / QC	_TAMDVFVC[Carbamidomethyl (C)]TYFMPAAQLPELPDVELPTNKDVC[Carbamidomethyl (C)]DPGNTK_	P02774;P02774-3	1.17599	1.17599	3.28238e-33	7.72541e-31	170	P02774;P02774-3	GC	Vitamin D-binding protein;Isoform 3 of Vitamin D-binding protein	VTDB_HUMAN	1	125.948	2.25948	Dengue	QC	NaN	NaN	NaN	140.051	0.0769254
Dengue / QC	_KDDIMLDEGMLQSLMELPDQYNYGMYAK_	P07357	1.1918	1.1918	3.64941e-32	6.71035e-30	100	P07357	C8A	Complement component C8 alpha chain	CO8A_HUMAN	1	128.437	2.28437	Dengue	QC	NaN	NaN	NaN	80.9833	0.0622446
Dengue / QC	_LTVDKSRWQQGNVFSC[Carbamidomethyl (C)]SVM[Oxidation (M)]HEALHNHYTQK_	P01857	1.09726	1.09726	5.04252e-32	8.72652e-30	84	P01857	IGHG1	Immunoglobulin heavy constant gamma 1	IGHG1_HUMAN	1	113.948	2.13948	Dengue	QC	NaN	NaN	NaN	65.47	0.411321
Dengue / QC	_SGAGTEDSAC[Carbamidomethyl (C)]IPWAYYSTVDQVKDLYSGLIGPLIVC[Carbamidomethyl (C)]R_	P00450	1.56963	1.56963	6.37831e-32	1.07229e-29	162	P00450	CP	Ceruloplasmin	CERU_HUMAN	1	196.829	2.96829	Dengue	QC	NaN	NaN	NaN	148.279	0.105562
Dengue / QC	_LYLKHQM[Oxidation (M)]DLVATLSQLGLQELFQAPDLR_	P08697	1.0395	1.0395	8.18339e-32	1.33753e-29	104	P08697	SERPINF2	Alpha-2-antiplasmin	A2AP_HUMAN	1	105.551	2.05551	Dengue	QC	NaN	NaN	NaN	87.8768	0.130476
Dengue / QC	_YDPSLKPLSVSYDQATSLR_	P00918	1.18327	1.18327	1.20862e-31	1.87145e-29	88	P00918	CA2	Carbonic anhydrase 2	CAH2_HUMAN	1	127.091	2.27091	Dengue	QC	NaN	NaN	NaN	66.8003	0.0617307
Dengue / QC	_QGQIIYNWQGAQSTQDEVAASAILTAQLDEELGGTPVQSR_	P06396	1.23207	1.23207	1.47149e-31	2.22007e-29	146	P06396	GSN	Gelsolin	GELS_HUMAN	1	134.904	2.34904	Dengue	QC	NaN	NaN	NaN	120.467	0.0809706
Dengue / QC	_GGPLDGTYR_	P00918	1.06206	1.06206	1.74408e-31	2.56554e-29	70	P00918	CA2	Carbonic anhydrase 2	CAH2_HUMAN	1	108.791	2.08791	Dengue	QC	NaN	NaN	NaN	59.9331	0.0586122
Dengue / QC	_LTVDKSRWQEGNVFSC[Carbamidomethyl (C)]SVMHEALHNHYTQK_	P01861	1.21837	1.21837	2.69132e-31	3.79272e-29	94	P01861	IGHG4	Immunoglobulin heavy constant gamma 4	IGHG4_HUMAN	1	132.684	2.32684	Dengue	QC	NaN	NaN	NaN	47.9286	0.364756
Dengue / QC	_IHEDSDSALQLQDFYQEVANPLLTAVTFEYPSNAVEEVTQNNFR_	Q14624	1.50532	1.50532	2.7717e-31	3.79272e-29	156	Q14624	ITIH4	Inter-alpha-trypsin inhibitor heavy chain H4	ITIH4_HUMAN	1	183.887	2.83887	Dengue	QC	NaN	NaN	NaN	137.225	0.0948323
Dengue / QC	_EVTKEVVTSEDGSDC[Carbamidomethyl (C)]PEAM[Oxidation (M)]DLGTLSGIGTLDGFR_	P02671	2.89654	2.89654	6.41168e-31	8.20137e-29	112	P02671	FGA	Fibrinogen alpha chain	FIBA_HUMAN	1	644.637	7.44637	Dengue	QC	NaN	NaN	NaN	87.2956	0.374022
Dengue / QC	_TAGPDQTEMTIEGLQPTVEYVVSVYAQNPSGESQPLVQTAVTTIPAPTDLK_	P02751-14;P02751-8	1.54074	1.54074	7.50629e-31	9.39723e-29	160	P02751-14;P02751-8	FN1	Isoform 14 of Fibronectin;Isoform 8 of Fibronectin	FINC_HUMAN	1	190.943	2.90943	Dengue	QC	NaN	NaN	NaN	149.47	0.0961269
Dengue / QC	_TAMDVFVC[Carbamidomethyl (C)]TYFMPAAQLPELPDVELPTNK_	P02774;P02774-3	1.17458	1.17458	1.2615e-30	1.54639e-28	134	P02774;P02774-3	GC	Vitamin D-binding protein;Isoform 3 of Vitamin D-binding protein	VTDB_HUMAN	1	125.727	2.25727	Dengue	QC	NaN	NaN	NaN	104.787	0.0751426
Dengue / QC	_DVFLGMFLYEYAR_	P02768	0.974156	0.974156	1.6079e-30	1.93079e-28	176	P02768	ALB	Serum albumin	ALBU_HUMAN	1	96.4492	1.96449	Dengue	QC	NaN	NaN	NaN	171.495	0.0724447
Dengue / QC	_GTELQHLLHAVVPGPWQEDVADAEEC[Carbamidomethyl (C)]AGR_	G3XAK1;P26927	1.25322	1.25322	1.75119e-30	2.0608e-28	124	G3XAK1;P26927	MST1	Hepatocyte growth factor-like protein	G3XAK1_HUMAN;HGFL_HUMAN	1	138.372	2.38372	Dengue	QC	NaN	NaN	NaN	112.212	0.102392
Dengue / QC	_VLGAFSDGLAHLDNLK_	P68871	1.48851	1.48851	3.50983e-30	3.75489e-28	48	P68871	HBB	Hemoglobin subunit beta	HBB_HUMAN	1	180.598	2.80598	Dengue	QC	NaN	NaN	NaN	41.3588	0.0454511
Dengue / QC	_GLPNVVTSAISLPNIR_	Q92954-3	1.63575	1.63575	1.72018e-29	1.60659e-27	80	Q92954-3	PRG4	Isoform C of Proteoglycan 4	PRG4_HUMAN	1	210.749	3.10749	Dengue	QC	NaN	NaN	NaN	57.5623	0.103284
Dengue / QC	_DLEVVAATPTSLLISWDAPAVTVR_	P02751;P02751-15;P02751-3;P02751-7	1.37281	1.37281	4.07037e-29	3.6288e-27	170	P02751;P02751-15;P02751-3;P02751-7	FN1	Fibronectin;Isoform 15 of Fibronectin;Isoform 3 of Fibronectin;Isoform 7 of Fibronectin	FINC_HUMAN	1	158.975	2.58975	Dengue	QC	NaN	NaN	NaN	162.467	0.102664
Dengue / QC	_ANPTVTLFPPSSEELQANKATLVC[Carbamidomethyl (C)]LISDFYPGAVTVAWK_	A0A0B4J231;B9A064	1.84773	1.84773	7.34768e-29	6.25234e-27	164	A0A0B4J231;B9A064	IGLL5	Immunoglobulin lambda-like polypeptide 5	A0A0B4J231_HUMAN;IGLL5_HUMAN	1	259.934	3.59934	Dengue	QC	NaN	NaN	NaN	151.694	0.129597
Dengue / QC	_QPNC[Carbamidomethyl (C)]DDPETEEAALVAIDYINQNLPWGYK_	P02765	1.00915	1.00915	8.17315e-28	5.59195e-26	168	P02765	AHSG	Alpha-2-HS-glycoprotein	FETUA_HUMAN	1	101.272	2.01272	Dengue	QC	NaN	NaN	NaN	127.181	0.0720349
Dengue / QC	_SDLGAVISLLLWGR_	P00739	1.16341	1.16341	1.51492e-27	9.79537e-26	128	P00739	HPR	Haptoglobin-related protein	HPTR_HUMAN	1	123.985	2.23985	Dengue	QC	NaN	NaN	NaN	106.822	0.1013
Dengue / QC	_VTSTLTIKESDWLGQSMFTC[Carbamidomethyl (C)]R_	P01871	0.222833	0.222833	1.67814e-27	1.07328e-25	136	P01871	IGHM	Immunoglobulin heavy constant mu	IGHM_HUMAN	1	16.7023	1.16702	Dengue	QC	NaN	NaN	NaN	57.5723	0.334605
Dengue / QC	_PYTFHSHGITYYK_	P00450	-0.350003	0.350003	3.2045e-27	1.98477e-25	82	P00450	CP	Ceruloplasmin	CERU_HUMAN	1	-21.5418	0.784582	Dengue	QC	NaN	NaN	NaN	39.2801	0.225732
Dengue / QC	_VWPQQPSGELFEIEIDTLETTC[Carbamidomethyl (C)]HVLDPTPVAR_	P02765	1.0556	1.0556	3.61381e-27	2.19213e-25	140	P02765	AHSG	Alpha-2-HS-glycoprotein	FETUA_HUMAN	1	107.859	2.07859	Dengue	QC	NaN	NaN	NaN	135.567	0.0782543
Dengue / QC	_YGGGFYSTQDTINAIEGLTEYSLLVK_	P01031	0.899332	0.899332	4.29762e-27	2.55426e-25	146	P01031	C5	Complement C5	CO5_HUMAN	1	86.5203	1.8652	Dengue	QC	NaN	NaN	NaN	126.899	0.0681161
Dengue / QC	_SWVPHTFESELSDPVELLVAES_	P04217	0.808911	0.808911	4.75855e-27	2.79993e-25	176	P04217	A1BG	Alpha-1B-glycoprotein	A1BG_HUMAN	1	75.1889	1.75189	Dengue	QC	NaN	NaN	NaN	137.38	0.0667694
Dengue / QC	_LPEGSVSLIILLTDGDPTVGETNPR_	Q14624	1.20464	1.20464	5.15982e-27	2.97968e-25	120	Q14624	ITIH4	Inter-alpha-trypsin inhibitor heavy chain H4	ITIH4_HUMAN	1	130.48	2.3048	Dengue	QC	NaN	NaN	NaN	97.8349	0.0895698
Dengue / QC	_NGESVKLHLETDSLALVALGALDTALYAAGSK_	P0C0L5	1.73386	1.73386	5.25541e-27	3.00222e-25	154	P0C0L5	C4B	Complement C4-B	CO4B_HUMAN	1	232.616	3.32616	Dengue	QC	NaN	NaN	NaN	133.573	0.112902
Dengue / QC	_EVYMPSSIFQDDFVIPDISEPGTWK_	P0C0L5	0.977559	0.977559	5.47055e-27	3.06559e-25	176	P0C0L5	C4B	Complement C4-B	CO4B_HUMAN	1	96.913	1.96913	Dengue	QC	NaN	NaN	NaN	130.652	0.0748216
Dengue / QC	_LRLEPGKEYLIM[Oxidation (M)]GLDGATYDLEGHPQYLLDSNSWIEEMPSER_	P0C0L5	0.795987	0.795987	5.92973e-27	3.29156e-25	110	P0C0L5	C4B	Complement C4-B	CO4B_HUMAN	1	73.6265	1.73627	Dengue	QC	NaN	NaN	NaN	85.3063	0.163858
Dengue / QC	_TDGC[Carbamidomethyl (C)]QHFC[Carbamidomethyl (C)]LPGQESYTC[Carbamidomethyl (C)]SC[Carbamidomethyl (C)]AQGYR_	P22891;P22891-2	1.08546	1.08546	9.29728e-27	5.0653e-25	70	P22891;P22891-2	PROZ	Vitamin K-dependent protein Z;Isoform 2 of Vitamin K-dependent protein Z	PROZ_HUMAN	1	112.205	2.12205	Dengue	QC	NaN	NaN	NaN	51.563	0.107999
Dengue / QC	_YRGDQDATMSILDISMMTGFAPDTDDLK_	P01024	1.16551	1.16551	1.12061e-26	5.94026e-25	144	P01024	C3	Complement C3	CO3_HUMAN	1	124.312	2.24312	Dengue	QC	NaN	NaN	NaN	128.076	0.088244
Dengue / QC	_DC[Carbamidomethyl (C)]QDIANK_	P02679;P02679-2	5.86152	5.86152	1.20547e-26	6.26056e-25	48	P02679;P02679-2	FGG	Fibrinogen gamma chain;Isoform Gamma-A of Fibrinogen gamma chain	FIBG_HUMAN	1	5714.24	58.1424	Dengue	QC	NaN	NaN	NaN	37.8815	0.21842
Dengue / QC	_WNPEVDC[Carbamidomethyl (C)]TEKR_	Q9BXR6	0.975501	0.975501	1.70281e-26	8.63738e-25	34	Q9BXR6	CFHR5	Complement factor H-related protein 5	FHR5_HUMAN	1	96.6324	1.96632	Dengue	QC	NaN	NaN	NaN	24.5292	0.16087
Dengue / QC	_AAPSVTLFPPSSEELQANKATLVC[Carbamidomethyl (C)]LISDFYPGAVTVAWK_	P0DOY2	1.92898	1.92898	2.19513e-26	1.09459e-24	170	P0DOY2	IGLC2	Immunoglobulin lambda constant 2	IGLC2_HUMAN	1	280.786	3.80786	Dengue	QC	NaN	NaN	NaN	144.693	0.153391
Dengue / QC	_QSM[Oxidation (M)]TLSSEVQIPDFDVDLGTILR_	P04114	1.64366	1.64366	2.95135e-26	1.44714e-24	120	P04114	APOB	Apolipoprotein B-100	APOB_HUMAN	1	212.457	3.12457	Dengue	QC	NaN	NaN	NaN	74.763	0.0879725
Dengue / QC	_VPLLLSEPINIIDALEMR_	P04114	0.837273	0.837273	5.42366e-26	2.57361e-24	162	P04114	APOB	Apolipoprotein B-100	APOB_HUMAN	1	78.667	1.78667	Dengue	QC	NaN	NaN	NaN	140.028	0.0711522
Dengue / QC	_SLFTDLVAEKDLFHC[Carbamidomethyl (C)]VSFTLPR_	P20742	2.47981	2.47981	6.38838e-26	3.00714e-24	62	P20742	PZP	Pregnancy zone protein	PZP_HUMAN	1	457.824	5.57824	Dengue	QC	NaN	NaN	NaN	50.8114	0.120144
Dengue / QC	_LVYHLGLPFSFLTFPYVEEAIK_	A0A182DWH7;P49908	1.23304	1.23304	6.8091e-26	3.17974e-24	88	A0A182DWH7;P49908	SELENOP	Selenoprotein P (Fragment);Selenoprotein P	A0A182DWH7_HUMAN;SEPP1_HUMAN	1	135.062	2.35062	Dengue	QC	NaN	NaN	NaN	77.1751	0.0849858
Dengue / QC	_VQLSNDFDEYIMAIEQTIK_	P01024	0.835999	0.835999	1.01111e-25	4.61577e-24	176	P01024	C3	Complement C3	CO3_HUMAN	1	78.5092	1.78509	Dengue	QC	NaN	NaN	NaN	113.356	0.062129
Dengue / QC	_TLADLTLLDSPIKVPLLLSEPINIIDALEMR_	P04114	2.02353	2.02353	1.30732e-25	5.87197e-24	144	P04114	APOB	Apolipoprotein B-100	APOB_HUMAN	1	306.577	4.06577	Dengue	QC	NaN	NaN	NaN	84.7965	0.151476
Dengue / QC	_FFESFGDLSTPDAVMGNPK_	P68871	0.57281	0.57281	1.86428e-25	8.31019e-24	166	P68871	HBB	Hemoglobin subunit beta	HBB_HUMAN	1	48.7418	1.48742	Dengue	QC	NaN	NaN	NaN	143.299	0.0478244
Dengue / QC	_AVHEAASPSQTVQR_	A0A286YES5;P01854	1.96839	1.96839	2.16411e-25	9.50147e-24	32	A0A286YES5;P01854	IGHE	Immunoglobulin heavy constant epsilon (Fragment);Immunoglobulin heavy constant epsilon	A0A286YES5_HUMAN;IGHE_HUMAN	1	291.332	3.91332	Dengue	QC	NaN	NaN	NaN	24.0465	0.169111
Dengue / QC	_VFPLSLC[Carbamidomethyl (C)]STQPDGNVVIAC[Carbamidomethyl (C)]LVQGFFPQEPLSVTWSESGQGVTAR_	P01876	1.5486	1.5486	2.97625e-25	1.269e-23	158	P01876	IGHA1	Immunoglobulin heavy constant alpha 1	IGHA1_HUMAN	1	192.533	2.92533	Dengue	QC	NaN	NaN	NaN	138.627	0.12546
Dengue / QC	_LRVDPVNFK_	P69905	1.8706	1.8706	3.31749e-25	1.40432e-23	46	P69905	HBA1	Hemoglobin subunit alpha	HBA_HUMAN	1	265.685	3.65685	Dengue	QC	NaN	NaN	NaN	28.861	0.0588757
Dengue / QC	_VPTADLEDVLPLAEDITNILSK_	P02774;P02774-3	0.99908	0.99908	5.61533e-25	2.25506e-23	176	P02774;P02774-3	GC	Vitamin D-binding protein;Isoform 3 of Vitamin D-binding protein	VTDB_HUMAN	1	99.8725	1.99872	Dengue	QC	NaN	NaN	NaN	170.471	0.0877385
Dengue / QC	_LSLESLTSYFSIESSTKGDVK_	P04114	0.799215	0.799215	7.55026e-25	3.00174e-23	148	P04114	APOB	Apolipoprotein B-100	APOB_HUMAN	1	74.0155	1.74015	Dengue	QC	NaN	NaN	NaN	142.076	0.0748524
Dengue / QC	_EPC[Carbamidomethyl (C)]VESLVSQYFQTVTDYGKDLM[Oxidation (M)]EK_	P02652;V9GYM3	1.22139	1.22139	8.8112e-25	3.47954e-23	80	P02652;V9GYM3	APOA2	Apolipoprotein A-II	APOA2_HUMAN;V9GYM3_HUMAN	1	133.171	2.33171	Dengue	QC	NaN	NaN	NaN	70.0415	0.0749473
Dengue / QC	_KAGTELVNFLSYFVELGTQPATQ_	P02652;V9GYM3	1.25755	1.25755	1.15651e-24	4.53661e-23	120	P02652;V9GYM3	APOA2	Apolipoprotein A-II	APOA2_HUMAN;V9GYM3_HUMAN	1	139.089	2.39089	Dengue	QC	NaN	NaN	NaN	96.7109	0.0960945
Dengue / QC	_SELTQQLNALFQDK_	P06727	1.11425	1.11425	2.03186e-24	7.7132e-23	70	P06727	APOA4	Apolipoprotein A-IV	APOA4_HUMAN	1	116.482	2.16482	Dengue	QC	NaN	NaN	NaN	61.0484	0.0989686
Dengue / QC	_VSFLSALEEYTK_	P02647	1.03479	1.03479	2.34019e-24	8.82671e-23	44	P02647	APOA1	Apolipoprotein A-I	APOA1_HUMAN	1	104.882	2.04882	Dengue	QC	NaN	NaN	NaN	34.1488	0.0457939
Dengue / QC	_HQMDLVATLSQLGLQELFQAPDLR_	P08697	1.08879	1.08879	3.73176e-24	1.38973e-22	172	P08697	SERPINF2	Alpha-2-antiplasmin	A2AP_HUMAN	1	112.695	2.12695	Dengue	QC	NaN	NaN	NaN	157.593	0.0891796
Dengue / QC	_FGGVLHLSDLDDDGLDEIIMAAPLR_	P80108	0.993107	0.993107	4.72484e-24	1.72677e-22	160	P80108	GPLD1	Phosphatidylinositol-glycan-specific phospholipase D	PHLD_HUMAN	1	99.0466	1.99047	Dengue	QC	NaN	NaN	NaN	132.671	0.0866151
Dengue / QC	_DHMKSVIPSDGPSVAC[Carbamidomethyl (C)]VK_	P02787	-0.378821	0.378821	5.21153e-24	1.8698e-22	38	P02787	TF	Serotransferrin	TRFE_HUMAN	1	-23.0934	0.769066	Dengue	QC	NaN	NaN	NaN	25.0194	0.220456
Dengue / QC	_MDWLVPATC[Carbamidomethyl (C)]EPIQSVFFFSGDK_	P04004	1.1666	1.1666	1.41428e-23	4.75521e-22	106	P04004	VTN	Vitronectin	VTNC_HUMAN	1	124.482	2.24482	Dengue	QC	NaN	NaN	NaN	98.4484	0.0932636
Dengue / QC	_LREQLGPVTQEFWDNLEK_	P02647	1.33572	1.33572	3.08277e-23	1.00772e-21	72	P02647	APOA1	Apolipoprotein A-I	APOA1_HUMAN	1	152.402	2.52402	Dengue	QC	NaN	NaN	NaN	63.7044	0.0834033
Dengue / QC	_DGWHSWPIAHQWPQGPSAVDAAFSWEEK_	P02790	1.12801	1.12801	3.52978e-23	1.14747e-21	148	P02790	HPX	Hemopexin	HEMO_HUMAN	1	118.557	2.18557	Dengue	QC	NaN	NaN	NaN	127.144	0.0915133
Dengue / QC	_ESATITC[Carbamidomethyl (C)]LVTGFSPADVFVQWMQR_	P01871	1.17809	1.17809	3.77859e-23	1.22161e-21	172	P01871	IGHM	Immunoglobulin heavy constant mu	IGHM_HUMAN	1	126.278	2.26278	Dengue	QC	NaN	NaN	NaN	117.244	0.0933002
Dengue / QC	_KPLEKAVANFFSGSC[Carbamidomethyl (C)]APC[Carbamidomethyl (C)]ADGTDFPQLC[Carbamidomethyl (C)]QLC[Carbamidomethyl (C)]PGC[Carbamidomethyl (C)]GC[Carbamidomethyl (C)]STLNQYFGYSGAFK_	P02787	-0.989416	0.989416	5.60649e-23	1.79475e-21	54	P02787	TF	Serotransferrin	TRFE_HUMAN	1	-49.6318	0.503682	Dengue	QC	NaN	NaN	NaN	37.9597	0.188634
Dengue / QC	_LNLVATPLFLKPGIPYPIKVQVK_	P01031	1.20034	1.20034	7.45361e-23	2.33282e-21	56	P01031	C5	Complement C5	CO5_HUMAN	1	129.795	2.29795	Dengue	QC	NaN	NaN	NaN	38.3256	0.104323
Dengue / QC	_LHLETDSLALVALGALDTALYAAGSK_	P0C0L5	0.934691	0.934691	8.99046e-23	2.79893e-21	174	P0C0L5	C4B	Complement C4-B	CO4B_HUMAN	1	91.1481	1.91148	Dengue	QC	NaN	NaN	NaN	162.089	0.0888665
Dengue / QC	_QVLLVGAPTYDDVSK_	P80108	0.925489	0.925489	1.33132e-22	4.05881e-21	54	P80108	GPLD1	Phosphatidylinositol-glycan-specific phospholipase D	PHLD_HUMAN	1	89.9328	1.89933	Dengue	QC	NaN	NaN	NaN	41.7429	0.0875291
Dengue / QC	_TSTADYAM[Oxidation (M)]FK_	P02679;P02679-2	4.24728	4.24728	2.51818e-22	7.29901e-21	30	P02679;P02679-2	FGG	Fibrinogen gamma chain;Isoform Gamma-A of Fibrinogen gamma chain	FIBG_HUMAN	1	1799.15	18.9915	Dengue	QC	NaN	NaN	NaN	24.2366	0.111555
Dengue / QC	_ADSQAQLLLSTVVGVFTAPGLHLKQPFVQGLALYTPVVLPR_	P01019	0.921641	0.921641	2.93488e-22	8.42383e-21	150	P01019	AGT	Angiotensinogen	ANGT_HUMAN	1	89.4269	1.89427	Dengue	QC	NaN	NaN	NaN	143.319	0.0904893
Dengue / QC	_VGPEADKYR_	P02679;P02679-2	4.53154	4.53154	3.22294e-22	9.20572e-21	116	P02679;P02679-2	FGG	Fibrinogen gamma chain;Isoform Gamma-A of Fibrinogen gamma chain	FIBG_HUMAN	1	2212.76	23.1276	Dengue	QC	NaN	NaN	NaN	86.0121	0.339753
Dengue / QC	_EIVM[Oxidation (M)]TQSPPTLSLSPGER_	A0A075B6H7	-0.125424	0.125424	3.49119e-22	9.78199e-21	172	A0A075B6H7	IGKV3-7	Immunoglobulin kappa variable 3-7 (non-functional) (Fragment)	A0A075B6H7_HUMAN	1	-8.32655	0.916734	Dengue	QC	NaN	NaN	NaN	88.3005	0.210312
Dengue / QC	_TLLLVGSPTWK_	P80108	1.17503	1.17503	4.1804e-22	1.15481e-20	80	P80108	GPLD1	Phosphatidylinositol-glycan-specific phospholipase D	PHLD_HUMAN	1	125.798	2.25798	Dengue	QC	NaN	NaN	NaN	68.432	0.0949076
Dengue / QC	_QSMTLSSEVQIPDFDVDLGTILR_	P04114	1.37951	1.37951	4.33628e-22	1.19227e-20	142	P04114	APOB	Apolipoprotein B-100	APOB_HUMAN	1	160.179	2.60179	Dengue	QC	NaN	NaN	NaN	78.3028	0.119854
Dengue / QC	_EPGQDLVVLPLSITTDFIPSFR_	P01024	0.888797	0.888797	4.42716e-22	1.2116e-20	176	P01024	C3	Complement C3	CO3_HUMAN	1	85.1632	1.85163	Dengue	QC	NaN	NaN	NaN	137.849	0.077895
Dengue / QC	_EYLIM[Oxidation (M)]GLDGATYDLEGHPQYLLDSNSWIEEMPSER_	P0C0L5	1.35433	1.35433	5.04099e-22	1.3606e-20	126	P0C0L5	C4B	Complement C4-B	CO4B_HUMAN	1	155.678	2.55678	Dengue	QC	NaN	NaN	NaN	85.3229	0.147788
Dengue / QC	_MRKDDIMLDEGMLQSLMELPDQYNYGMYAK_	P07357	0.992732	0.992732	9.09957e-22	2.40098e-20	94	P07357	C8A	Complement component C8 alpha chain	CO8A_HUMAN	1	98.995	1.98995	Dengue	QC	NaN	NaN	NaN	61.1387	0.074875
Dengue / QC	_VADALTNAVAHVDDM[Oxidation (M)]PNALSALSDLHAHK_	P69905	1.29113	1.29113	9.33408e-22	2.44097e-20	74	P69905	HBA1	Hemoglobin subunit alpha	HBA_HUMAN	1	144.72	2.4472	Dengue	QC	NaN	NaN	NaN	61.0152	0.071806
Dengue / QC	_MYYSAVEPTK_	E9PFZ2	2.12205	2.12205	1.08287e-21	2.79456e-20	54	E9PFZ2	CP	Ceruloplasmin	E9PFZ2_HUMAN	1	335.313	4.35313	Dengue	QC	NaN	NaN	NaN	28.9201	0.0903152
Dengue / QC	_REDFDVEAADSAGNC[Carbamidomethyl (C)]LDSLVFVAGDR_	P09871	1.28384	1.28384	1.33926e-21	3.42618e-20	94	P09871	C1S	Complement C1s subcomponent	C1S_HUMAN	1	143.486	2.43486	Dengue	QC	NaN	NaN	NaN	79.7879	0.100486
Dengue / QC	_YIYPLDSLTWIEYWPR_	P01031	1.21194	1.21194	1.43921e-21	3.66595e-20	80	P01031	C5	Complement C5	CO5_HUMAN	1	131.648	2.31648	Dengue	QC	NaN	NaN	NaN	37.6669	0.0783925
Dengue / QC	_VETVDRFQILTLWLPDSLTTWEIHGLSLSK_	P0C0L5	2.29427	2.29427	1.81459e-21	4.60218e-20	74	P0C0L5	C4B	Complement C4-B	CO4B_HUMAN	1	390.505	4.90505	Dengue	QC	NaN	NaN	NaN	59.9717	0.135491
Dengue / QC	_SLLSNVEGDNAVPMQHNNRPTQPLK_	P00915	1.22628	1.22628	2.31567e-21	5.79805e-20	48	P00915	CA1	Carbonic anhydrase 1	CAH1_HUMAN	1	133.963	2.33963	Dengue	QC	NaN	NaN	NaN	42.6356	0.065533
Dengue / QC	_VETNM[Oxidation (M)]AFSPFSIASLLTQVLLGAGENTK_	P05155;P05155-3	0.88132	0.88132	2.32748e-21	5.80292e-20	76	P05155;P05155-3	SERPING1	Plasma protease C1 inhibitor;Isoform 3 of Plasma protease C1 inhibitor	IC1_HUMAN	1	84.2061	1.84206	Dengue	QC	NaN	NaN	NaN	48.0448	0.217162
Dengue / QC	_MDWLVPATC[Carbamidomethyl (C)]EPIQSVFFFSGDKYYR_	P04004	1.10624	1.10624	3.75909e-21	9.21602e-20	108	P04004	VTN	Vitronectin	VTNC_HUMAN	1	115.284	2.15284	Dengue	QC	NaN	NaN	NaN	82.3574	0.0890199
Dengue / QC	_FRIEDGFSLKEQLQDMGLVDLFSPEK_	P01008	1.64313	1.64313	4.24554e-21	1.0238e-19	130	P01008	SERPINC1	Antithrombin-III	ANT3_HUMAN	1	212.343	3.12343	Dengue	QC	NaN	NaN	NaN	105.506	0.138001
Dengue / QC	_HLIVTPSGC[Carbamidomethyl (C)]GEQNMIGMTPTVIAVHYLDETEQWEKFGLEK_	P01024	0.889434	0.889434	4.86113e-21	1.16747e-19	128	P01024	C3	Complement C3	CO3_HUMAN	1	85.2449	1.85245	Dengue	QC	NaN	NaN	NaN	104.994	0.0976931
Dengue / QC	_NKADYVETVLDSTC[Carbamidomethyl (C)]SSTVQFLEYELNVLGTHK_	P04114	1.3382	1.3382	5.59352e-21	1.33248e-19	106	P04114	APOB	Apolipoprotein B-100	APOB_HUMAN	1	152.836	2.52836	Dengue	QC	NaN	NaN	NaN	92.9298	0.105678
Dengue / QC	_LGEVNTYAGDLQK_	P06727	0.838397	0.838397	6.06693e-21	1.42791e-19	102	P06727	APOA4	Apolipoprotein A-IV	APOA4_HUMAN	1	78.8062	1.78806	Dengue	QC	NaN	NaN	NaN	84.5822	0.0761036
Dengue / QC	_SLHTLFGD[Carboxy]K[Carboxy]LC[Carbamidomethyl (C)]TVATLR_	P02768	0.600765	0.600765	6.18139e-21	1.44906e-19	120	P02768	ALB	Serum albumin	ALBU_HUMAN	1	51.6521	1.51652	Dengue	QC	NaN	NaN	NaN	38.7642	0.256412
Dengue / QC	_YQEDTC[Carbamidomethyl (C)]YGDAGSAFAVHDLEEDTWYATGILSFDK_	P00738	1.31809	1.31809	6.21327e-21	1.45075e-19	158	P00738	HP	Haptoglobin	HPT_HUMAN	1	149.336	2.49336	Dengue	QC	NaN	NaN	NaN	86.6163	0.100641
Dengue / QC	_MGPTVSPIC[Carbamidomethyl (C)]LPGTSSDYNLMDGDLGLISGWGR_	P09871	0.640153	0.640153	8.83111e-21	2.03774e-19	172	P09871	C1S	Complement C1s subcomponent	C1S_HUMAN	1	55.8495	1.55849	Dengue	QC	NaN	NaN	NaN	107.888	0.0644722
Dengue / QC	_WVQTLSEQVQEELLSSQVTQELR_	P02649	1.47433	1.47433	1.24127e-20	2.78764e-19	66	P02649	APOE	Apolipoprotein E	APOE_HUMAN	1	177.854	2.77854	Dengue	QC	NaN	NaN	NaN	58.2285	0.123412
Dengue / QC	_VPLLLSEPINIIDALEM[Oxidation (M)]R_	P04114	0.973041	0.973041	1.81604e-20	3.97234e-19	100	P04114	APOB	Apolipoprotein B-100	APOB_HUMAN	1	96.2973	1.96297	Dengue	QC	NaN	NaN	NaN	87.756	0.0932511
Dengue / QC	_ATLVC[Carbamidomethyl (C)]LISDFYPGAVTVAWK_	P0DOY2	1.12374	1.12374	1.86737e-20	4.06949e-19	176	P0DOY2	IGLC2	Immunoglobulin lambda constant 2	IGLC2_HUMAN	1	117.911	2.17911	Dengue	QC	NaN	NaN	NaN	116.419	0.0922911
Dengue / QC	_NPDPVAAPWC[Carbamidomethyl (C)]YTTDPSVR_	P08519	1.14316	1.14316	2.81579e-20	6.00293e-19	50	P08519	LPA	Apolipoprotein(a)	APOA_HUMAN	1	120.864	2.20864	Dengue	QC	NaN	NaN	NaN	41.7506	0.10535
Dengue / QC	_NKYGM[Oxidation (M)]VAQVTQTLK_	P04114	-1.15186	1.15186	3.40813e-20	7.23951e-19	38	P04114	APOB	Apolipoprotein B-100	APOB_HUMAN	1	-54.9955	0.450045	Dengue	QC	NaN	NaN	NaN	25.2963	0.228616
Dengue / QC	_ILLMDLNEEDPTVLELGITGSK_	P27169	0.871928	0.871928	3.44743e-20	7.29664e-19	176	P27169	PON1	Serum paraoxonase/arylesterase 1	PON1_HUMAN	1	83.0107	1.83011	Dengue	QC	NaN	NaN	NaN	113.906	0.0701055
Dengue / QC	_ANSFLGEKASAGLLGAHAAAITAYALTLTKAPADLR_	A0A140TA29	0.271885	0.271885	3.85059e-20	8.09175e-19	38	A0A140TA29	C4B	Complement C4-B	A0A140TA29_HUMAN	1	20.7384	1.20738	Dengue	QC	NaN	NaN	NaN	14.5463	0.109382
Dengue / QC	_SILQM[Oxidation (M)]SLDHHIVTPLTSLVIENEAGDER_	P19823	1.98048	1.98048	4.12941e-20	8.64679e-19	118	P19823	ITIH2	Inter-alpha-trypsin inhibitor heavy chain H2	ITIH2_HUMAN	1	294.626	3.94626	Dengue	QC	NaN	NaN	NaN	104.795	0.14289
Dengue / QC	_MVC[Carbamidomethyl (C)]AGYK_	H0YAC1;P03952	1.31795	1.31795	4.27862e-20	8.92745e-19	92	H0YAC1;P03952	KLKB1	Plasma kallikrein (Fragment);Plasma kallikrein	H0YAC1_HUMAN;KLKB1_HUMAN	1	149.312	2.49312	Dengue	QC	NaN	NaN	NaN	79.2317	0.095057
Dengue / QC	_TTENYPNAGLIMNYC[Carbamidomethyl (C)]R_	P08519	1.81252	1.81252	5.54439e-20	1.14467e-18	50	P08519	LPA	Apolipoprotein(a)	APOA_HUMAN	1	251.255	3.51255	Dengue	QC	NaN	NaN	NaN	43.0496	0.121432
Dengue / QC	_QDGSVDFGRK_	P02675	5.50564	5.50564	6.46411e-20	1.32989e-18	32	P02675	FGB	Fibrinogen beta chain	FIBB_HUMAN	1	4443.2	45.432	Dengue	QC	NaN	NaN	NaN	27.0385	0.193769
Dengue / QC	_APDVFPIISGC[Carbamidomethyl (C)]R_	A0A0A0MS09;P01880;P01880-2	1.71881	1.71881	6.59512e-20	1.34742e-18	78	A0A0A0MS09;P01880;P01880-2	IGHD	Immunoglobulin heavy constant delta (Fragment);Immunoglobulin heavy constant delta;Isoform 2 of Immunoglobulin heavy constant delta	A0A0A0MS09_HUMAN;IGHD_HUMAN;IGHD_HUMAN	1	229.165	3.29165	Dengue	QC	NaN	NaN	NaN	67.6269	0.145022
Dengue / QC	_KEGGLGPLNIPLLADVTR_	P32119	1.12148	1.12148	7.04238e-20	1.43382e-18	66	P32119	PRDX2	Peroxiredoxin-2	PRDX2_HUMAN	1	117.569	2.17569	Dengue	QC	NaN	NaN	NaN	54.8222	0.0816988
Dengue / QC	_NPDAEIRPWC[Carbamidomethyl (C)]YTMDPSVR_	P08519	1.30623	1.30623	8.1921e-20	1.65076e-18	72	P08519	LPA	Apolipoprotein(a)	APOA_HUMAN	1	147.294	2.47294	Dengue	QC	NaN	NaN	NaN	63.1612	0.0910529
Dengue / QC	_GSSTWLTAFVLKVLSLAQEQVGGSPEK_	P0C0L5	1.01364	1.01364	8.90765e-20	1.76473e-18	90	P0C0L5	C4B	Complement C4-B	CO4B_HUMAN	1	101.899	2.01899	Dengue	QC	NaN	NaN	NaN	66.3466	0.108099
Dengue / QC	_SSTSPTTNVLLSPLSVATALSALSLGAEQR_	P36955	0.981835	0.981835	9.67961e-20	1.91124e-18	172	P36955	SERPINF1	Pigment epithelium-derived factor	PEDF_HUMAN	1	97.4976	1.97498	Dengue	QC	NaN	NaN	NaN	129.74	0.111278
Dengue / QC	_DFHINLFQVLPWLK_	B4E1Z4	0.835888	0.835888	1.02596e-19	2.01225e-18	176	B4E1Z4	NaN	cDNA FLJ55673, highly similar to Complement factor B (EC 3.4.21.47)	B4E1Z4_HUMAN	1	78.4955	1.78496	Dengue	QC	NaN	NaN	NaN	155.863	0.0858526
Dengue / QC	_EFTPPVQAAYQK_	P68871	2.17496	2.17496	1.06903e-19	2.08976e-18	26	P68871	HBB	Hemoglobin subunit beta	HBB_HUMAN	1	351.575	4.51575	Dengue	QC	NaN	NaN	NaN	19.6562	0.0493168
Dengue / QC	_EDYLDVYVFGVGPLVNQVNINALASKK_	B4E1Z4	1.74234	1.74234	1.80565e-19	3.38357e-18	62	B4E1Z4	NaN	cDNA FLJ55673, highly similar to Complement factor B (EC 3.4.21.47)	B4E1Z4_HUMAN	1	234.577	3.34577	Dengue	QC	NaN	NaN	NaN	48.8139	0.115908
Dengue / QC	_TLQGIPQMIGEVIR_	P04114	1.11593	1.11593	1.81595e-19	3.39208e-18	78	P04114	APOB	Apolipoprotein B-100	APOB_HUMAN	1	116.735	2.16735	Dengue	QC	NaN	NaN	NaN	65.325	0.109686
Dengue / QC	_ADDKETC[Carbamidomethyl (C)]FAEEPTMR_	A0A0C4DGB6	1.28914	1.28914	3.02907e-19	5.56969e-18	82	A0A0C4DGB6	ALB	Serum albumin	A0A0C4DGB6_HUMAN	1	144.382	2.44382	Dengue	QC	NaN	NaN	NaN	73.6559	0.107464
Dengue / QC	_LHLETDSLALVALGALDTALYAAGSKSHKPLNMGK_	P0C0L5	1.69442	1.69442	3.4893e-19	6.31724e-18	62	P0C0L5	C4B	Complement C4-B	CO4B_HUMAN	1	223.646	3.23646	Dengue	QC	NaN	NaN	NaN	42.4605	0.193973
Dengue / QC	_PRPGVTEATITGLEPGTEYTIYVIALK_	P02751;P02751-15;P02751-3;P02751-7	2.59147	2.59147	3.55865e-19	6.42304e-18	48	P02751;P02751-15;P02751-3;P02751-7	FN1	Fibronectin;Isoform 15 of Fibronectin;Isoform 3 of Fibronectin;Isoform 7 of Fibronectin	FINC_HUMAN	1	502.713	6.02713	Dengue	QC	NaN	NaN	NaN	37.638	0.177057
Dengue / QC	_TEC[Carbamidomethyl (C)]FITGWGETQGTFGAGLLK_	P00747	0.932167	0.932167	4.02893e-19	7.22751e-18	104	P00747	PLG	Plasminogen	PLMN_HUMAN	1	90.814	1.90814	Dengue	QC	NaN	NaN	NaN	85.2121	0.0787894
Dengue / QC	_W[Carboxy]YVDGVEVHNAK_	P01860	-0.0378523	0.0378523	4.46756e-19	7.9658e-18	114	P01860	IGHG3	Immunoglobulin heavy constant gamma 3	IGHG3_HUMAN	1	-2.5896	0.974104	Dengue	QC	NaN	NaN	NaN	55.6026	0.233851
Dengue / QC	_ALEFLQLHNGR_	P80108	1.32246	1.32246	5.33812e-19	9.43229e-18	52	P80108	GPLD1	Phosphatidylinositol-glycan-specific phospholipase D	PHLD_HUMAN	1	150.092	2.50092	Dengue	QC	NaN	NaN	NaN	43.2946	0.0990525
Dengue / QC	_VVYRQYTDSTFRVPVER_	P00450	4.55452	4.55452	7.8579e-19	1.35193e-17	30	P00450	CP	Ceruloplasmin	CERU_HUMAN	1	2249.89	23.4989	Dengue	QC	NaN	NaN	NaN	22.2798	0.143414
Dengue / QC	_LTIGEGQQHHLGGAK_	P02679;P02679-2	8.24607	8.24607	8.98891e-19	1.53752e-17	32	P02679;P02679-2	FGG	Fibrinogen gamma chain;Isoform Gamma-A of Fibrinogen gamma chain	FIBG_HUMAN	1	30261	303.61	Dengue	QC	NaN	NaN	NaN	25.4714	0.315693
Dengue / QC	_IFFPGVSEFGK_	F8WF14;P06276	0.815507	0.815507	1.0745e-18	1.81678e-17	68	F8WF14;P06276	BCHE	Carboxylic ester hydrolase;Cholinesterase	F8WF14_HUMAN;CHLE_HUMAN	1	75.9917	1.75992	Dengue	QC	NaN	NaN	NaN	56.9579	0.0871423
Dengue / QC	_KMTVTDQVNC[Carbamidomethyl (C)]PKLS_	P05090	3.32333	3.32333	1.30078e-18	2.1868e-17	32	P05090	APOD	Apolipoprotein D	APOD_HUMAN	1	900.975	10.0098	Dengue	QC	NaN	NaN	NaN	24.1786	0.135243
Dengue / QC	_LREQLGPVTQEFWDNLEKETEGLR_	P02647	1.79028	1.79028	1.33763e-18	2.24234e-17	42	P02647	APOA1	Apolipoprotein A-I	APOA1_HUMAN	1	245.882	3.45882	Dengue	QC	NaN	NaN	NaN	33.9853	0.119988
Dengue / QC	_TVAAC[Carbamidomethyl (C)]NLPIVRGPC[Carbamidomethyl (C)]R_	P02760	3.80388	3.80388	1.70333e-18	2.82321e-17	30	P02760	AMBP	Protein AMBP	AMBP_HUMAN	1	1296.63	13.9663	Dengue	QC	NaN	NaN	NaN	21.8195	0.132578
Dengue / QC	_GLRQGYFVEAQPK_	P02743	4.05723	4.05723	1.9177e-18	3.16071e-17	32	P02743	APCS	Serum amyloid P-component	SAMP_HUMAN	1	1564.75	16.6475	Dengue	QC	NaN	NaN	NaN	26.0978	0.1875
Dengue / QC	_M[Oxidation (M)]YYSAVEPTKDIFTGLIGPM[Oxidation (M)]K_	E9PFZ2	3.08849	3.08849	2.41714e-18	3.97276e-17	26	E9PFZ2	CP	Ceruloplasmin	E9PFZ2_HUMAN	1	750.606	8.50606	Dengue	QC	NaN	NaN	NaN	14.8205	0.142512
Dengue / QC	_SLGNVIMVC[Carbamidomethyl (C)]R_	P08603	0.805425	0.805425	2.75048e-18	4.49551e-17	140	P08603	CFH	Complement factor H	CFAH_HUMAN	1	74.7661	1.74766	Dengue	QC	NaN	NaN	NaN	120.891	0.0761579
Dengue / QC	_DPDQTDGLGLSYLSSHIANVER_	P06396	1.35647	1.35647	3.05295e-18	4.92152e-17	60	P06396	GSN	Gelsolin	GELS_HUMAN	1	156.058	2.56058	Dengue	QC	NaN	NaN	NaN	49.2329	0.111024
Dengue / QC	_SLDFTELDVAAEKIDRFMQAVTGWK_	P01019	1.70509	1.70509	3.18365e-18	5.10815e-17	86	P01019	AGT	Angiotensinogen	ANGT_HUMAN	1	226.048	3.26048	Dengue	QC	NaN	NaN	NaN	60.0166	0.119049
Dengue / QC	_HDTSLKPISVSYNPATAK_	P00915	0.961412	0.961412	3.52142e-18	5.55496e-17	62	P00915	CA1	Carbonic anhydrase 1	CAH1_HUMAN	1	94.7215	1.94722	Dengue	QC	NaN	NaN	NaN	53.2255	0.0703043
Dengue / QC	_DTWVEHWPEEDEC[Carbamidomethyl (C)]QDEENQKQC[Carbamidomethyl (C)]QDLGAFTESMVVFGC[Carbamidomethyl (C)]PN_	P01024	1.31338	1.31338	3.80898e-18	5.97655e-17	148	P01024	C3	Complement C3	CO3_HUMAN	1	148.523	2.48523	Dengue	QC	NaN	NaN	NaN	51.9285	0.109806
Dengue / QC	_A[Acetyl (Protein N-term)]SPDWGYDDKNGPEQWSK_	P00915	2.23892	2.23892	4.08848e-18	6.39803e-17	70	P00915	CA1	Carbonic anhydrase 1	CAH1_HUMAN	1	372.044	4.72044	Dengue	QC	NaN	NaN	NaN	60.0414	0.183668
Dengue / QC	_NPSDPMPQAPALWIETTAYALLHLLLHEGK_	P0C0L5	1.33543	1.33543	4.29967e-18	6.70949e-17	38	P0C0L5	C4B	Complement C4-B	CO4B_HUMAN	1	152.35	2.5235	Dengue	QC	NaN	NaN	NaN	30.8867	0.117464
Dengue / QC	_IQHPFTVEEFVLPKFEVK_	P20742	3.1095	3.1095	5.03848e-18	7.8017e-17	44	P20742	PZP	Pregnancy zone protein	PZP_HUMAN	1	763.084	8.63084	Dengue	QC	NaN	NaN	NaN	37.9558	0.195788
Dengue / QC	_AYIFIDEAHITQALIWLSQR_	P01023	0.894942	0.894942	5.45856e-18	8.38594e-17	98	P01023	A2M	Alpha-2-macroglobulin	A2MG_HUMAN	1	85.9534	1.85953	Dengue	QC	NaN	NaN	NaN	77.4122	0.0933179
Dengue / QC	_LTVDKSRWQQGNIFSC[Carbamidomethyl (C)]SVMHEALHNR_	P01860	0.066333	0.066333	6.01716e-18	9.22005e-17	52	P01860	IGHG3	Immunoglobulin heavy constant gamma 3	IGHG3_HUMAN	1	4.7052	1.04705	Dengue	QC	NaN	NaN	NaN	27.1258	0.363671
Dengue / QC	_ATNYNAGDR_	P61626	1.31279	1.31279	6.57505e-18	1.00227e-16	100	P61626	LYZ	Lysozyme C	LYSC_HUMAN	1	148.422	2.48422	Dengue	QC	NaN	NaN	NaN	92.3068	0.126391
Dengue / QC	_TPENYPNDGLTMNYC[Carbamidomethyl (C)]R_	P08519	2.47384	2.47384	7.70573e-18	1.17159e-16	36	P08519	LPA	Apolipoprotein(a)	APOA_HUMAN	1	455.521	5.55521	Dengue	QC	NaN	NaN	NaN	27.1205	0.150203
Dengue / QC	_VHTE[Carboxy]C[Carbamidomethyl (C)]C[Carbamidomethyl (C)]HGDLLEC[Carbamidomethyl (C)]ADDRADLAK_	P02768	0.298539	0.298539	8.17653e-18	1.23361e-16	110	P02768	ALB	Serum albumin	ALBU_HUMAN	1	22.9898	1.2299	Dengue	QC	NaN	NaN	NaN	78.3072	0.115072
Dengue / QC	_QHLPLIK_	P02671	3.69259	3.69259	1.03385e-17	1.54396e-16	32	P02671	FGA	Fibrinogen alpha chain	FIBA_HUMAN	1	1192.94	12.9294	Dengue	QC	NaN	NaN	NaN	23.3765	0.13942
Dengue / QC	_KVFLDC[Carbamidomethyl (C)]C[Carbamidomethyl (C)]NYITELR_	P01024	1.25537	1.25537	1.10414e-17	1.64474e-16	50	P01024	C3	Complement C3	CO3_HUMAN	1	138.729	2.38729	Dengue	QC	NaN	NaN	NaN	43.7517	0.08663
Dengue / QC	_ELISLVEDVSSNYDGC[Carbamidomethyl (C)]C[Carbamidomethyl (C)]EGDVVQC[Carbamidomethyl (C)]IR_	P43652	1.28108	1.28108	1.23079e-17	1.82417e-16	72	P43652	AFM	Afamin	AFAM_HUMAN	1	143.02	2.4302	Dengue	QC	NaN	NaN	NaN	58.7759	0.113849
Dengue / QC	_GFLLLASLR_	P07996	1.41665	1.41665	1.3272e-17	1.9547e-16	84	P07996	THBS1	Thrombospondin-1	TSP1_HUMAN	1	166.964	2.66964	Dengue	QC	NaN	NaN	NaN	51.2361	0.158854
Dengue / QC	_EVVTSEDGSDC[Carbamidomethyl (C)]PEAM[Oxidation (M)]DLGTLSGIGTLDGFR_	P02671	1.04134	1.04134	1.32883e-17	1.9547e-16	52	P02671	FGA	Fibrinogen alpha chain	FIBA_HUMAN	1	105.814	2.05814	Dengue	QC	NaN	NaN	NaN	31.1588	0.426614
Dengue / QC	_EYGVVLAPDGSTVAVEPLLAGLEAGLQGR_	Q96PD5	0.81359	0.81359	1.40376e-17	2.05979e-16	172	Q96PD5	PGLYRP2	N-acetylmuramoyl-L-alanine amidase	PGRP2_HUMAN	1	75.7579	1.75758	Dengue	QC	NaN	NaN	NaN	117.22	0.0726153
Dengue / QC	_SLWNGDTGEC[Carbamidomethyl (C)]TDNAYIDIQLR_	P01042	1.11869	1.11869	1.43447e-17	2.09961e-16	134	P01042	KNG1	Kininogen-1	KNG1_HUMAN	1	117.15	2.1715	Dengue	QC	NaN	NaN	NaN	58.4653	0.0944626
Dengue / QC	_C[Carbamidomethyl (C)]AEENC[Carbamidomethyl (C)]FIQKSDDKVTLEER_	P01024	3.14018	3.14018	1.6109e-17	2.33462e-16	38	P01024	C3	Complement C3	CO3_HUMAN	1	781.634	8.81634	Dengue	QC	NaN	NaN	NaN	33.2667	0.18879
Dengue / QC	_DC[Carbamidomethyl (C)]QDIANKGAK_	P02679;P02679-2	7.04338	7.04338	1.68893e-17	2.42974e-16	26	P02679;P02679-2	FGG	Fibrinogen gamma chain;Isoform Gamma-A of Fibrinogen gamma chain	FIBG_HUMAN	1	13090.8	131.908	Dengue	QC	NaN	NaN	NaN	20.9987	0.194361
Dengue / QC	_FGSSLITVR_	P80108	0.580106	0.580106	1.73025e-17	2.48312e-16	162	P80108	GPLD1	Phosphatidylinositol-glycan-specific phospholipase D	PHLD_HUMAN	1	49.4959	1.49496	Dengue	QC	NaN	NaN	NaN	115.742	0.0576256
Dengue / QC	_VQLSNDFDEYIM[Oxidation (M)]AIEQTIK_	P01024	1.18932	1.18932	1.905e-17	2.70097e-16	176	P01024	C3	Complement C3	CO3_HUMAN	1	128.045	2.28045	Dengue	QC	NaN	NaN	NaN	136.406	0.090982
Dengue / QC	_LGREGVQKEDIPPADLSDQVPDTESETR_	P01024	2.6758	2.6758	2.20374e-17	3.10955e-16	106	P01024	C3	Complement C3	CO3_HUMAN	1	538.995	6.38995	Dengue	QC	NaN	NaN	NaN	73.0814	0.242481
Dengue / QC	_SPAGPTVVSIGGGK_	P09172	1.62742	1.62742	2.61094e-17	3.64047e-16	44	P09172	DBH	Dopamine beta-hydroxylase	DOPO_HUMAN	1	208.959	3.08959	Dengue	QC	NaN	NaN	NaN	36.3977	0.0999997
Dengue / QC	_GDFSSANNRDNTYNR_	P02671	4.13956	4.13956	2.76878e-17	3.84233e-16	56	P02671	FGA	Fibrinogen alpha chain	FIBA_HUMAN	1	1662.51	17.6251	Dengue	QC	NaN	NaN	NaN	39.9112	0.284769
Dengue / QC	_QSNNKYAASSYLSLTPEQWKSHK_	P0DOY3	6.67666	6.67666	2.79798e-17	3.87372e-16	28	P0DOY3	IGLC3	Immunoglobulin lambda constant 3	IGLC3_HUMAN	1	10130	102.3	Dengue	QC	NaN	NaN	NaN	22.2403	0.228453
Dengue / QC	_ALTDM[Oxidation (M)]PQMR_	P02671	2.93916	2.93916	2.81308e-17	3.88548e-16	34	P02671	FGA	Fibrinogen alpha chain	FIBA_HUMAN	1	666.965	7.66965	Dengue	QC	NaN	NaN	NaN	28.1665	0.152527
Dengue / QC	_VGFYESDVMGRGHAR_	P01023	4.83808	4.83808	3.25029e-17	4.45797e-16	24	P01023	A2M	Alpha-2-macroglobulin	A2MG_HUMAN	1	2760.27	28.6027	Dengue	QC	NaN	NaN	NaN	17.8138	0.125911
Dengue / QC	_VLSNVESGFSLKPC[Carbamidomethyl (C)]ALSEIGC[Carbamidomethyl (C)]HM[Oxidation (M)]NIFQHLAFSDVDVAR_	H0YAC1;P03952	0.44761	0.44761	4.7025e-17	6.24594e-16	54	H0YAC1;P03952	KLKB1	Plasma kallikrein (Fragment);Plasma kallikrein	H0YAC1_HUMAN;KLKB1_HUMAN	1	36.3779	1.36378	Dengue	QC	NaN	NaN	NaN	23.4704	0.294277
Dengue / QC	_HYLM[Oxidation (M)]WGLSSDFWGEKPNLSYIIGK_	P01024	1.08532	1.08532	5.5502e-17	7.33874e-16	104	P01024	C3	Complement C3	CO3_HUMAN	1	112.184	2.12184	Dengue	QC	NaN	NaN	NaN	72.1948	0.100119
Dengue / QC	_SSTSPTTNVLLSPLSVATALSALSLGAEQRTESIIHR_	P36955	2.06371	2.06371	6.26576e-17	8.19283e-16	62	P36955	SERPINF1	Pigment epithelium-derived factor	PEDF_HUMAN	1	318.059	4.18059	Dengue	QC	NaN	NaN	NaN	36.1164	0.18718
Dengue / QC	_DSSTWLTAFVLKVLSLAQEQVGGSPEK_	A0A140TA49	1.18344	1.18344	7.25534e-17	9.42394e-16	72	A0A140TA49	C4A	Complement C4-A	A0A140TA49_HUMAN	1	127.118	2.27118	Dengue	QC	NaN	NaN	NaN	60.8712	0.170752
Dengue / QC	_C[Carbamidomethyl (C)]TLKPC[Carbamidomethyl (C)]DYPDIKHGGLYHENMR_	P08603	3.70243	3.70243	8.46772e-17	1.08549e-15	36	P08603	CFH	Complement factor H	CFAH_HUMAN	1	1201.79	13.0179	Dengue	QC	NaN	NaN	NaN	29.6263	0.212649
Dengue / QC	_HRQIVVDKYYQENFC[Carbamidomethyl (C)]EQIC[Carbamidomethyl (C)]SK_	P13671	2.85602	2.85602	9.62145e-17	1.2201e-15	34	P13671	C6	Complement component C6	CO6_HUMAN	1	624.016	7.24016	Dengue	QC	NaN	NaN	NaN	27.7355	0.185114
Dengue / QC	_LLNNWDVC[Carbamidomethyl (C)]ADMVGTFTDTEDPAKFK_	P02753;Q5VY30	0.915196	0.915196	9.91592e-17	1.25474e-15	130	P02753;Q5VY30	RBP4	Retinol-binding protein 4;Retinol binding protein 4, plasma, isoform CRA_b	RET4_HUMAN;Q5VY30_HUMAN	1	88.5825	1.88583	Dengue	QC	NaN	NaN	NaN	105.632	0.0940783
Dengue / QC	_QSNNKYAASSYLSLTPEQWR_	P15814	2.20607	2.20607	1.17168e-16	1.46373e-15	82	P15814	IGLL1	Immunoglobulin lambda-like polypeptide 1	IGLL1_HUMAN	1	361.417	4.61417	Dengue	QC	NaN	NaN	NaN	66.9428	0.178896
Dengue / QC	_QFTSSTSYNRGDSTFESKSYK_	P02671	3.24496	3.24496	1.19528e-16	1.49005e-15	30	P02671	FGA	Fibrinogen alpha chain	FIBA_HUMAN	1	848.051	9.48051	Dengue	QC	NaN	NaN	NaN	21.7861	0.132375
Dengue / QC	_GSGFFVFSR_	A0A286YES5;P01854	2.34718	2.34718	1.19907e-16	1.49161e-15	38	A0A286YES5;P01854	IGHE	Immunoglobulin heavy constant epsilon (Fragment);Immunoglobulin heavy constant epsilon	A0A286YES5_HUMAN;IGHE_HUMAN	1	408.83	5.0883	Dengue	QC	NaN	NaN	NaN	31.6574	0.21605
Dengue / QC	_QLEQVIAK_	P02671	3.45036	3.45036	1.38131e-16	1.70034e-15	78	P02671	FGA	Fibrinogen alpha chain	FIBA_HUMAN	1	993.103	10.931	Dengue	QC	NaN	NaN	NaN	62.0924	0.271678
Dengue / QC	_SFEGLGQLEVLTLDHNQLQEVK_	P35858;P35858-2	0.9662	0.9662	1.42495e-16	1.74676e-15	88	P35858;P35858-2	IGFALS	Insulin-like growth factor-binding protein complex acid labile subunit;Isoform 2 of Insulin-like growth factor-binding protein complex acid labile subunit	ALS_HUMAN	1	95.3688	1.95369	Dengue	QC	NaN	NaN	NaN	65.8717	0.0823317
Dengue / QC	_APVGHFYEPQAPSAEVEMTSYVLLAYLTAQPAPTSEDLTSATNIVK_	P01023	0.92806	0.92806	1.50474e-16	1.8369e-15	146	P01023	A2M	Alpha-2-macroglobulin	A2MG_HUMAN	1	90.2716	1.90272	Dengue	QC	NaN	NaN	NaN	131.383	0.103819
Dengue / QC	_TGC[Carbamidomethyl (C)]SLMGASVDSTLAFNTYVHFQGK_	P01019	-0.204699	0.204699	1.53726e-16	1.86885e-15	42	P01019	AGT	Angiotensinogen	ANGT_HUMAN	1	-13.228	0.86772	Dengue	QC	NaN	NaN	NaN	34.3795	0.24764
Dengue / QC	_QC[Carbamidomethyl (C)]QDLGAFTESMVVFGC[Carbamidomethyl (C)]PN_	P01024	1.01735	1.01735	1.60627e-16	1.94471e-15	148	P01024	C3	Complement C3	CO3_HUMAN	1	102.42	2.0242	Dengue	QC	NaN	NaN	NaN	109.659	0.0863393
Dengue / QC	_EVDLKDYEDQQK_	P02671	3.20398	3.20398	1.60331e-16	1.94471e-15	96	P02671	FGA	Fibrinogen alpha chain	FIBA_HUMAN	1	821.496	9.21496	Dengue	QC	NaN	NaN	NaN	74.1518	0.277236
Dengue / QC	_IAQLPLTGSMSIIFFLPLK_	P36955	1.04622	1.04622	1.64196e-16	1.98383e-15	84	P36955	SERPINF1	Pigment epithelium-derived factor	PEDF_HUMAN	1	106.512	2.06512	Dengue	QC	NaN	NaN	NaN	56.1939	0.099953
Dengue / QC	_HQSAC[Carbamidomethyl (C)]KDSDWPFC[Carbamidomethyl (C)]SDEDWNYK_	P02671	2.62597	2.62597	1.66021e-16	2.00178e-15	48	P02671	FGA	Fibrinogen alpha chain	FIBA_HUMAN	1	517.301	6.17301	Dengue	QC	NaN	NaN	NaN	41.0982	0.186717
Dengue / QC	_SPLFMGKVVNPTQK_	P01009	2.90947	2.90947	1.73905e-16	2.08314e-15	60	P01009	SERPINA1	Alpha-1-antitrypsin	A1AT_HUMAN	1	651.342	7.51342	Dengue	QC	NaN	NaN	NaN	45.8453	0.200749
Dengue / QC	_RAPYPNYDRDILTIDIGR_	Q16610	0.946702	0.946702	1.74185e-16	2.08314e-15	106	Q16610	ECM1	Extracellular matrix protein 1	ECM1_HUMAN	1	92.7461	1.92746	Dengue	QC	NaN	NaN	NaN	89.0235	0.0986159
Dengue / QC	_LRLEPGKEYLIMGLDGATYDLEGHPQYLLDSNSWIEEMPSER_	P0C0L5	1.11315	1.11315	1.92712e-16	2.30003e-15	164	P0C0L5	C4B	Complement C4-B	CO4B_HUMAN	1	116.317	2.16317	Dengue	QC	NaN	NaN	NaN	115.739	0.131173
Dengue / QC	_AAPSVTLFPPSSEELQANKATLVC[Carbamidomethyl (C)]LISDFYPGAVTVAWKADSSPVK_	P0DOY2	2.30873	2.30873	2.03039e-16	2.4046e-15	108	P0DOY2	IGLC2	Immunoglobulin lambda constant 2	IGLC2_HUMAN	1	395.446	4.95446	Dengue	QC	NaN	NaN	NaN	81.379	0.22644
Dengue / QC	_VREYYFAEAQIADFSDPAFISK_	P05546	0.618658	0.618658	2.17816e-16	2.56839e-15	128	P05546	SERPIND1	Heparin cofactor 2	HEP2_HUMAN	1	53.5446	1.53545	Dengue	QC	NaN	NaN	NaN	115.666	0.0644914
Dengue / QC	_AVPPNNSNAAEDDLPTVELQGVVPR_	P00488	1.19745	1.19745	2.56971e-16	3.00003e-15	78	P00488	F13A1	Coagulation factor XIII A chain	F13A_HUMAN	1	129.333	2.29333	Dengue	QC	NaN	NaN	NaN	55.7869	0.120708
Dengue / QC	_KGGETSEM[Oxidation (M)]YLIQPDSSVKPYR_	P02675	2.62579	2.62579	2.80464e-16	3.26136e-15	44	P02675	FGB	Fibrinogen beta chain	FIBB_HUMAN	1	517.221	6.17221	Dengue	QC	NaN	NaN	NaN	35.0148	0.171406
Dengue / QC	_SFAAGIQALGGTNINDAMLMAVQLLDSSNQEER_	Q14624	1.06541	1.06541	3.10713e-16	3.60598e-15	136	Q14624	ITIH4	Inter-alpha-trypsin inhibitor heavy chain H4	ITIH4_HUMAN	1	109.277	2.09277	Dengue	QC	NaN	NaN	NaN	40.6891	0.0809631
Dengue / QC	_LTVSIEAR_	P22792	0.599222	0.599222	3.32826e-16	3.85501e-15	154	P22792	CPN2	Carboxypeptidase N subunit 2	CPN2_HUMAN	1	51.4899	1.5149	Dengue	QC	NaN	NaN	NaN	127.744	0.068992
Dengue / QC	_VFKDVFLEMNIPYSVVR_	P01031	0.7211	0.7211	3.4996e-16	4.04551e-15	112	P01031	C5	Complement C5	CO5_HUMAN	1	64.8439	1.64844	Dengue	QC	NaN	NaN	NaN	74.8649	0.0881298
Dengue / QC	_DC[Carbamidomethyl (C)]SLPYATESKEC[Carbamidomethyl (C)]R_	P23142	3.00153	3.00153	3.88992e-16	4.45298e-15	76	P23142	FBLN1	Fibulin-1	FBLN1_HUMAN	1	700.85	8.0085	Dengue	QC	NaN	NaN	NaN	56.9771	0.243774
Dengue / QC	_MKPVPDLVPGNFKSQLQK_	P02671	3.6082	3.6082	3.97588e-16	4.54254e-15	30	P02671	FGA	Fibrinogen alpha chain	FIBA_HUMAN	1	1119.48	12.1948	Dengue	QC	NaN	NaN	NaN	22.5256	0.181455
Dengue / QC	_RC[Carbamidomethyl (C)]C[Carbamidomethyl (C)]QDGVTRLPMMR_	P0C0L5	2.97653	2.97653	4.58396e-16	5.16706e-15	80	P0C0L5	C4B	Complement C4-B	CO4B_HUMAN	1	687.089	7.87089	Dengue	QC	NaN	NaN	NaN	68.4826	0.234888
Dengue / QC	_NPSSAGSWNSGSSGPGSTGNR_	P02671	2.07325	2.07325	4.79673e-16	5.38626e-15	70	P02671	FGA	Fibrinogen alpha chain	FIBA_HUMAN	1	320.833	4.20833	Dengue	QC	NaN	NaN	NaN	64.8489	0.192266
Dengue / QC	_AVLDVFEEGTEASAATAVKITLLSALVETR_	P01011	1.67684	1.67684	5.03587e-16	5.63328e-15	98	P01011	SERPINA3	Alpha-1-antichymotrypsin	AACT_HUMAN	1	219.726	3.19726	Dengue	QC	NaN	NaN	NaN	88.7286	0.150031
Dengue / QC	_ALPAPIEKTISK_	P01857	7.04007	7.04007	5.44006e-16	6.06237e-15	28	P01857	IGHG1	Immunoglobulin heavy constant gamma 1	IGHG1_HUMAN	1	13060.5	131.605	Dengue	QC	NaN	NaN	NaN	21.9468	0.339138
Dengue / QC	_QKTGLDSPTGIDFSDITANSFTVHWIAPR_	P02751;P02751-15;P02751-3;P02751-7	1.06101	1.06101	5.53026e-16	6.14877e-15	98	P02751;P02751-15;P02751-3;P02751-7	FN1	Fibronectin;Isoform 15 of Fibronectin;Isoform 3 of Fibronectin;Isoform 7 of Fibronectin	FINC_HUMAN	1	108.64	2.0864	Dengue	QC	NaN	NaN	NaN	65.7757	0.116968
Dengue / QC	_TLMNLGGLAVAR_	P37802;X6RJP6	1.39911	1.39911	5.78947e-16	6.4153e-15	48	P37802;X6RJP6	TAGLN2	Transgelin-2;Transgelin-2 (Fragment)	TAGL2_HUMAN;X6RJP6_HUMAN	1	163.739	2.63739	Dengue	QC	NaN	NaN	NaN	32.6507	0.122117
Dengue / QC	_NIFISPVSISMALAMLSLGTC[Carbamidomethyl (C)]GHTR_	P08185	0.808689	0.808689	5.96097e-16	6.58275e-15	136	P08185	SERPINA6	Corticosteroid-binding globulin	CBG_HUMAN	1	75.1619	1.75162	Dengue	QC	NaN	NaN	NaN	125.543	0.0894541
Dengue / QC	_QVKDNENVVNEYSSELEK_	P02675	2.67454	2.67454	5.99001e-16	6.60023e-15	36	P02675	FGB	Fibrinogen beta chain	FIBB_HUMAN	1	538.435	6.38435	Dengue	QC	NaN	NaN	NaN	31.5923	0.163909
Dengue / QC	_IIRSSEDPNEDIVER_	P01591	4.28524	4.28524	6.01867e-16	6.61941e-15	40	P01591	JCHAIN	Immunoglobulin J chain	IGJ_HUMAN	1	1849.77	19.4977	Dengue	QC	NaN	NaN	NaN	26.5808	0.236443
Dengue / QC	_GLPAPIEKTISK_	P01859	5.67878	5.67878	6.30805e-16	6.91183e-15	60	P01859	IGHG2	Immunoglobulin heavy constant gamma 2	IGHG2_HUMAN	1	5022.51	51.2251	Dengue	QC	NaN	NaN	NaN	40.2048	0.507208
Dengue / QC	_AGAEPASER_	P01042-2	1.91662	1.91662	7.26841e-16	7.91987e-15	86	P01042-2	KNG1	Isoform LMW of Kininogen-1	KNG1_HUMAN	1	277.537	3.77537	Dengue	QC	NaN	NaN	NaN	51.0226	0.143519
Dengue / QC	_ESATITC[Carbamidomethyl (C)]LVTGFSPADVFVQWM[Oxidation (M)]QR_	P01871	0.890992	0.890992	8.04944e-16	8.73855e-15	88	P01871	IGHM	Immunoglobulin heavy constant mu	IGHM_HUMAN	1	85.445	1.85445	Dengue	QC	NaN	NaN	NaN	68.5295	0.0860281
Dengue / QC	_GRFPLYNLGFGHNVDFNFLEVMSMENNGR_	P19827	1.39892	1.39892	8.19482e-16	8.87998e-15	52	P19827	ITIH1	Inter-alpha-trypsin inhibitor heavy chain H1	ITIH1_HUMAN	1	163.704	2.63704	Dengue	QC	NaN	NaN	NaN	34.5274	0.15129
Dengue / QC	_VVAGVANALAHKYH_	P68871	1.01557	1.01557	8.82859e-16	9.53164e-15	50	P68871	HBB	Hemoglobin subunit beta	HBB_HUMAN	1	102.17	2.0217	Dengue	QC	NaN	NaN	NaN	39.1471	0.088107
Dengue / QC	_NIPTVNENLENYYLEVNQLEK_	P51884	0.938642	0.938642	9.31753e-16	1.00227e-14	116	P51884	LUM	Lumican	LUM_HUMAN	1	91.6723	1.91672	Dengue	QC	NaN	NaN	NaN	108.641	0.103381
Dengue / QC	_QGLLPVLESFK_	P02647	1.42854	1.42854	9.8888e-16	1.05985e-14	48	P02647	APOA1	Apolipoprotein A-I	APOA1_HUMAN	1	169.174	2.69174	Dengue	QC	NaN	NaN	NaN	33.9672	0.083131
Dengue / QC	_LVSANRLFGDK_	P01008	3.41413	3.41413	1.01313e-15	1.08387e-14	34	P01008	SERPINC1	Antithrombin-III	ANT3_HUMAN	1	965.998	10.66	Dengue	QC	NaN	NaN	NaN	27.0717	0.197446
Dengue / QC	_AVHKAVLTIDEK_	P01009	3.08039	3.08039	1.05232e-15	1.12375e-14	50	P01009	SERPINA1	Alpha-1-antitrypsin	A1AT_HUMAN	1	745.841	8.45841	Dengue	QC	NaN	NaN	NaN	41.7002	0.234259
Dengue / QC	_IYLQPGRLAK_	P19823	3.78742	3.78742	1.13644e-15	1.20919e-14	30	P19823	ITIH2	Inter-alpha-trypsin inhibitor heavy chain H2	ITIH2_HUMAN	1	1280.79	13.8079	Dengue	QC	NaN	NaN	NaN	23.9588	0.176873
Dengue / QC	_SDFASNC[Carbamidomethyl (C)]C[Carbamidomethyl (C)]SINSPPLYC[Carbamidomethyl (C)]DSEIDAELKNIL_	P02774;P02774-3	0.853166	0.853166	1.15661e-15	1.22843e-14	156	P02774;P02774-3	GC	Vitamin D-binding protein;Isoform 3 of Vitamin D-binding protein	VTDB_HUMAN	1	80.6461	1.80646	Dengue	QC	NaN	NaN	NaN	116.309	0.101286
Dengue / QC	_SQLQKVPPEWK_	P02671	4.56794	4.56794	1.24313e-15	1.31794e-14	28	P02671	FGA	Fibrinogen alpha chain	FIBA_HUMAN	1	2271.85	23.7185	Dengue	QC	NaN	NaN	NaN	21.8272	0.184253
Dengue / QC	_FKNGM[Oxidation (M)]LHGDKVSFFC[Carbamidomethyl (C)]K_	P02749	-0.697463	0.697463	1.26913e-15	1.34309e-14	48	P02749	APOH	Beta-2-glycoprotein 1	APOH_HUMAN	1	-38.3344	0.616656	Dengue	QC	NaN	NaN	NaN	23.8164	0.310329
Dengue / QC	_IDQTVEELR_	P06727	1.58524	1.58524	1.32834e-15	1.40322e-14	76	P06727	APOA4	Apolipoprotein A-IV	APOA4_HUMAN	1	200.057	3.00057	Dengue	QC	NaN	NaN	NaN	55.3622	0.143863
Dengue / QC	_WQQGNIFSC[Carbamidomethyl (C)]SVMHEALHNRFTQK_	P01860	1.42513	1.42513	1.35696e-15	1.43089e-14	94	P01860	IGHG3	Immunoglobulin heavy constant gamma 3	IGHG3_HUMAN	1	168.538	2.68538	Dengue	QC	NaN	NaN	NaN	72.4605	0.141986
Dengue / QC	_EYVLPSFEVIVEPTEKFYYIYNEK_	P01024	1.05742	1.05742	1.68405e-15	1.76842e-14	146	P01024	C3	Complement C3	CO3_HUMAN	1	108.12	2.0812	Dengue	QC	NaN	NaN	NaN	96.1887	0.107538
Dengue / QC	_VQLSNDFDEYIMAIEQTIKSGSDEVQVGQQR_	P01024	3.6184	3.6184	1.7322e-15	1.81035e-14	70	P01024	C3	Complement C3	CO3_HUMAN	1	1128.14	12.2814	Dengue	QC	NaN	NaN	NaN	43.3959	0.315744
Dengue / QC	_TPENYPNAGLTENYC[Carbamidomethyl (C)]R_	P08519	1.973	1.973	1.76012e-15	1.83302e-14	46	P08519	LPA	Apolipoprotein(a)	APOA_HUMAN	1	292.583	3.92583	Dengue	QC	NaN	NaN	NaN	33.7182	0.169103
Dengue / QC	_LFLGALPGEDSSTSFC[Carbamidomethyl (C)]LNGLWAQGQR_	I3L145;P04278	1.40506	1.40506	1.86594e-15	1.93296e-14	84	I3L145;P04278	SHBG	Sex hormone-binding globulin	I3L145_HUMAN;SHBG_HUMAN	1	164.829	2.64829	Dengue	QC	NaN	NaN	NaN	71.1716	0.146901
Dengue / QC	_HLIVTPSGC[Carbamidomethyl (C)]GEQNM[Oxidation (M)]IGM[Oxidation (M)]TPTVIAVHYLDETEQWEK_	P01024	0.210649	0.210649	2.03088e-15	2.09644e-14	24	P01024	C3	Complement C3	CO3_HUMAN	1	15.7209	1.15721	Dengue	QC	NaN	NaN	NaN	13.2765	0.150725
Dengue / QC	_TAGYGINILGMDPLSTPFDNEFYNGLC[Carbamidomethyl (C)]NR_	P02748	0.809779	0.809779	2.15228e-15	2.21399e-14	168	P02748	C9	Complement component C9	CO9_HUMAN	1	75.2942	1.75294	Dengue	QC	NaN	NaN	NaN	97.9769	0.0842468
Dengue / QC	_DQYYNIDVPSR_	Q92954-3	1.09931	1.09931	2.21716e-15	2.27675e-14	80	Q92954-3	PRG4	Isoform C of Proteoglycan 4	PRG4_HUMAN	1	114.253	2.14253	Dengue	QC	NaN	NaN	NaN	38.7918	0.103327
Dengue / QC	_EWFWDLATGTMK_	P02790	1.15016	1.15016	2.27655e-15	2.32556e-14	116	P02790	HPX	Hemopexin	HEMO_HUMAN	1	121.938	2.21938	Dengue	QC	NaN	NaN	NaN	70.7156	0.115669
Dengue / QC	_V[Acetyl (Protein N-term)]LSPADKTNVK_	P69905	1.41036	1.41036	2.31772e-15	2.36351e-14	138	P69905	HBA1	Hemoglobin subunit alpha	HBA_HUMAN	1	165.803	2.65803	Dengue	QC	NaN	NaN	NaN	112.456	0.132505
Dengue / QC	_VPAPPSPQPATYTC[Carbamidomethyl (C)]VVSHEDSR_	A0A0A0MS09;P01880;P01880-2	1.4048	1.4048	2.50856e-15	2.54928e-14	72	A0A0A0MS09;P01880;P01880-2	IGHD	Immunoglobulin heavy constant delta (Fragment);Immunoglobulin heavy constant delta;Isoform 2 of Immunoglobulin heavy constant delta	A0A0A0MS09_HUMAN;IGHD_HUMAN;IGHD_HUMAN	1	164.781	2.64781	Dengue	QC	NaN	NaN	NaN	53.4686	0.124871
Dengue / QC	_VVAEGFDFANGINISPDGK_	P27169	1.18063	1.18063	2.77155e-15	2.78766e-14	54	P27169	PON1	Serum paraoxonase/arylesterase 1	PON1_HUMAN	1	126.675	2.26675	Dengue	QC	NaN	NaN	NaN	36.535	0.092277
Dengue / QC	_TC[Carbamidomethyl (C)]QAWSSM[Oxidation (M)]TPHSHSR_	P08519	1.67865	1.67865	2.86639e-15	2.87322e-14	52	P08519	LPA	Apolipoprotein(a)	APOA_HUMAN	1	220.129	3.20129	Dengue	QC	NaN	NaN	NaN	34.4779	0.205735
Dengue / QC	_NSLYLQMNSLRAE[Carboxy]DTAVYYC[Carbamidomethyl (C)]AR_	P01762	2.25162	2.25162	2.92139e-15	2.91842e-14	32	P01762	IGHV3-11	Immunoglobulin heavy variable 3-11	HV311_HUMAN	1	376.216	4.76216	Dengue	QC	NaN	NaN	NaN	22.2373	0.132067
Dengue / QC	_VHVSEEGTEPEAMLQVLGPKPALPAGTEDTAK_	P06396	0.991583	0.991583	3.15408e-15	3.14021e-14	38	P06396	GSN	Gelsolin	GELS_HUMAN	1	98.8366	1.98837	Dengue	QC	NaN	NaN	NaN	33.9369	0.0944432
Dengue / QC	_SDLGC[Carbamidomethyl (C)]GAGGGLNNANVFHLAGLTFLTNANADDSQENDEPC[Carbamidomethyl (C)]KEILRPR_	P01031	0.827054	0.827054	3.2561e-15	3.2363e-14	84	P01031	C5	Complement C5	CO5_HUMAN	1	77.4059	1.77406	Dengue	QC	NaN	NaN	NaN	72.582	0.0758043
Dengue / QC	_QMPGKGLEWMGR_	A0A0J9YXX1	1.03035	1.03035	3.2754e-15	3.24999e-14	38	A0A0J9YXX1	IGHV5-10-1	Immunoglobulin heavy variable 5-10-1	HV5X1_HUMAN	1	104.251	2.04251	Dengue	QC	NaN	NaN	NaN	26.0919	0.064455
Dengue / QC	_LNTDIAGLASAIDMSTNYNSDSLHFSNVFR_	P04114	1.71048	1.71048	3.51855e-15	3.46786e-14	70	P04114	APOB	Apolipoprotein B-100	APOB_HUMAN	1	227.27	3.2727	Dengue	QC	NaN	NaN	NaN	33.6959	0.123462
Dengue / QC	_HYDGSYSTFGERYGR_	P01023	4.17571	4.17571	3.58925e-15	3.53163e-14	50	P01023	A2M	Alpha-2-macroglobulin	A2MG_HUMAN	1	1707.23	18.0723	Dengue	QC	NaN	NaN	NaN	35.8241	0.271214
Dengue / QC	_FPSGTFEQVSQLVK_	P02774;P02774-3	0.919022	0.919022	3.61216e-15	3.54824e-14	62	P02774;P02774-3	GC	Vitamin D-binding protein;Isoform 3 of Vitamin D-binding protein	VTDB_HUMAN	1	89.0833	1.89083	Dengue	QC	NaN	NaN	NaN	56.2533	0.0751993
Dengue / QC	_RLWWLDLKSGAQATWTELPWPHEK_	P02790	1.118	1.118	3.75888e-15	3.68621e-14	162	P02790	HPX	Hemopexin	HEMO_HUMAN	1	117.046	2.17046	Dengue	QC	NaN	NaN	NaN	154.449	0.108998
Dengue / QC	_NIQEYLSILTDPDGKGK_	P04114	0.859305	0.859305	3.85847e-15	3.75783e-14	36	P04114	APOB	Apolipoprotein B-100	APOB_HUMAN	1	81.4164	1.81416	Dengue	QC	NaN	NaN	NaN	25.2874	0.0929714
Dengue / QC	_SMQGGLVGNDETVALTAFVTIALHHGLAVFQDEGAEPLK_	P0C0L5	1.3065	1.3065	4.19754e-15	4.0742e-14	76	P0C0L5	C4B	Complement C4-B	CO4B_HUMAN	1	147.341	2.47341	Dengue	QC	NaN	NaN	NaN	69.9224	0.131628
Dengue / QC	_SLKVVPEGIR_	P01024	2.03467	2.03467	4.27174e-15	4.13403e-14	90	P01024	C3	Complement C3	CO3_HUMAN	1	309.729	4.09729	Dengue	QC	NaN	NaN	NaN	60.008	0.215892
Dengue / QC	_WNPSPPAC[Carbamidomethyl (C)]EPNSC[Carbamidomethyl (C)]INLPDIPHASWETYPRPTK_	P04003	1.16623	1.16623	4.35215e-15	4.20493e-14	74	P04003	C4BPA	C4b-binding protein alpha chain	C4BPA_HUMAN	1	124.425	2.24425	Dengue	QC	NaN	NaN	NaN	24.1415	0.111564
Dengue / QC	_FRIEDGFSLKEQLQDM[Oxidation (M)]GLVDLFSPEK_	P01008	2.15271	2.15271	4.78318e-15	4.56887e-14	66	P01008	SERPINC1	Antithrombin-III	ANT3_HUMAN	1	344.661	4.44661	Dengue	QC	NaN	NaN	NaN	60.3043	0.209801
Dengue / QC	_QLEQVIAKDLLPSRDR_	P02671	5.09315	5.09315	4.80818e-15	4.58531e-14	24	P02671	FGA	Fibrinogen alpha chain	FIBA_HUMAN	1	3313.43	34.1343	Dengue	QC	NaN	NaN	NaN	17.8912	0.173118
Dengue / QC	_TENC[Carbamidomethyl (C)]AVLSGAANGK_	E9PHK0;P05452	1.30677	1.30677	4.89101e-15	4.64923e-14	26	E9PHK0;P05452	CLEC3B	Tetranectin	E9PHK0_HUMAN;TETN_HUMAN	1	147.388	2.47388	Dengue	QC	NaN	NaN	NaN	12.8612	0.174272
Dengue / QC	_WADLSGITK_	P29622	0.977034	0.977034	6.44286e-15	6.03548e-14	42	P29622	SERPINA4	Kallistatin	KAIN_HUMAN	1	96.8415	1.96841	Dengue	QC	NaN	NaN	NaN	34.9251	0.0860249
Dengue / QC	_KWDPYKQGFGNVATNTDGK_	P02675	2.90578	2.90578	6.55232e-15	6.10996e-14	60	P02675	FGB	Fibrinogen beta chain	FIBB_HUMAN	1	649.424	7.49424	Dengue	QC	NaN	NaN	NaN	48.7259	0.235905
Dengue / QC	_WNPSPPAC[Carbamidomethyl (C)]EPNSC[Carbamidomethyl (C)]INLPDIPHASWETYPRPTKEDVYVVGTVLR_	P04003	1.22051	1.22051	6.65476e-15	6.19567e-14	106	P04003	C4BPA	C4b-binding protein alpha chain	C4BPA_HUMAN	1	133.03	2.3303	Dengue	QC	NaN	NaN	NaN	89.3544	0.0926112
Dengue / QC	_DGEDQTQDTELVETRPAGDGTFQK_	P05534;P30447	1.26788	1.26788	6.72272e-15	6.24905e-14	50	P05534;P30447	HLA-A	HLA class I histocompatibility antigen, A-24 alpha chain;HLA class I histocompatibility antigen, A-23 alpha chain	1A24_HUMAN;1A23_HUMAN	1	140.807	2.40807	Dengue	QC	NaN	NaN	NaN	42.9247	0.124614
Dengue / QC	_AALTELSLGSAYQAMILGVDSK_	P04114	2.00944	2.00944	7.94411e-15	7.34927e-14	42	P04114	APOB	Apolipoprotein B-100	APOB_HUMAN	1	302.625	4.02625	Dengue	QC	NaN	NaN	NaN	23.6345	0.133451
Dengue / QC	_VVAGVANALAHK_	P68871	2.37931	2.37931	8.41503e-15	7.73657e-14	20	P68871	HBB	Hemoglobin subunit beta	HBB_HUMAN	1	420.29	5.2029	Dengue	QC	NaN	NaN	NaN	14.6396	0.0743263
Dengue / QC	_QAQQMVQPQSPVAVSQSKPGC[Carbamidomethyl (C)]YDNGK_	P02751;P02751-15;P02751-3;P02751-7	0.365107	0.365107	8.50067e-15	7.80311e-14	138	P02751;P02751-15;P02751-3;P02751-7	FN1	Fibronectin;Isoform 15 of Fibronectin;Isoform 3 of Fibronectin;Isoform 7 of Fibronectin	FINC_HUMAN	1	28.7977	1.28798	Dengue	QC	NaN	NaN	NaN	54.9056	0.391379
Dengue / QC	_AINEKLGQYASPTAKR_	P0C0L5	3.55302	3.55302	8.55314e-15	7.83905e-14	52	P0C0L5	C4B	Complement C4-B	CO4B_HUMAN	1	1073.72	11.7372	Dengue	QC	NaN	NaN	NaN	34.173	0.256999
Dengue / QC	_QC[Carbamidomethyl (C)]SKEDGGGWWYNR_	P02675	3.36037	3.36037	8.74558e-15	7.99053e-14	94	P02675	FGB	Fibrinogen beta chain	FIBB_HUMAN	1	927.001	10.27	Dengue	QC	NaN	NaN	NaN	68.2068	0.310847
Dengue / QC	_NQFSLQLNSVTPEDTAVYYC[Carbamidomethyl (C)]AR_	A0A0B4J1U7	1.07779	1.07779	9.18613e-15	8.34624e-14	52	A0A0B4J1U7	IGHV6-1	Immunoglobulin heavy variable 6-1	HV601_HUMAN	1	111.079	2.11079	Dengue	QC	NaN	NaN	NaN	36.7791	0.131843
Dengue / QC	_ATLDVDEAGTEAAAATSFAIK_	P29622	0.669431	0.669431	9.40984e-15	8.5312e-14	138	P29622	SERPINA4	Kallistatin	KAIN_HUMAN	1	59.0446	1.59045	Dengue	QC	NaN	NaN	NaN	84.5709	0.0832863
Dengue / QC	_HLIVTPSGC[Carbamidomethyl (C)]GEQNMIGMTPTVIAVHYLDETEQWEKFGLEKR_	P01024	0.866015	0.866015	9.54632e-15	8.64163e-14	116	P01024	C3	Complement C3	CO3_HUMAN	1	82.2621	1.82262	Dengue	QC	NaN	NaN	NaN	94.223	0.0918279
Dengue / QC	_NSLFFSAQPFEITASTNNEGNLK_	P04114	0.695373	0.695373	1.03624e-14	9.32302e-14	94	P04114	APOB	Apolipoprotein B-100	APOB_HUMAN	1	61.9303	1.6193	Dengue	QC	NaN	NaN	NaN	66.7534	0.102947
Dengue / QC	_WC[Carbamidomethyl (C)]AVSEHEATKC[Carbamidomethyl (C)]QSFRDHMK_	P02787	9.18137	9.18137	1.12691e-14	1.00924e-13	26	P02787	TF	Serotransferrin	TRFE_HUMAN	1	57958.9	580.589	Dengue	QC	NaN	NaN	NaN	14.2215	0.217868
Dengue / QC	_EGKEYGVVLAPDGSTVAVEPLLAGLEAGLQGR_	Q96PD5	0.871513	0.871513	1.18155e-14	1.05657e-13	172	Q96PD5	PGLYRP2	N-acetylmuramoyl-L-alanine amidase	PGRP2_HUMAN	1	82.9581	1.82958	Dengue	QC	NaN	NaN	NaN	149.869	0.0963001
Dengue / QC	_SVAVYGQYGGQPC[Carbamidomethyl (C)]VGNAFETQSC[Carbamidomethyl (C)]EPTRGC[Carbamidomethyl (C)]PTEEGC[Carbamidomethyl (C)]GER_	P10643	2.25058	2.25058	1.22847e-14	1.0952e-13	54	P10643	C7	Complement component C7	CO7_HUMAN	1	375.874	4.75874	Dengue	QC	NaN	NaN	NaN	44.0011	0.176754
Dengue / QC	_GIVAAFYSGPSLSDKEK_	P80108	1.19839	1.19839	1.27797e-14	1.13589e-13	58	P80108	GPLD1	Phosphatidylinositol-glycan-specific phospholipase D	PHLD_HUMAN	1	129.483	2.29483	Dengue	QC	NaN	NaN	NaN	43.8709	0.099703
Dengue / QC	_NVVFVIDKSGSMSGRK_	Q14624	1.45533	1.45533	1.32424e-14	1.17524e-13	74	Q14624	ITIH4	Inter-alpha-trypsin inhibitor heavy chain H4	ITIH4_HUMAN	1	174.219	2.74219	Dengue	QC	NaN	NaN	NaN	60.9034	0.155486
Dengue / QC	_VISTLEEPTPQC[Carbamidomethyl (C)]PTSQGR_	P09172	0.983086	0.983086	1.4015e-14	1.24006e-13	74	P09172	DBH	Dopamine beta-hydroxylase	DOPO_HUMAN	1	97.669	1.97669	Dengue	QC	NaN	NaN	NaN	50.0546	0.13189
Dengue / QC	_C[Carbamidomethyl (C)]IEGTC[Carbamidomethyl (C)]VC[Carbamidomethyl (C)]KLPYQC[Carbamidomethyl (C)]PK_	E7ETH0;G3XAM2;P05156	2.7508	2.7508	1.40832e-14	1.24422e-13	58	E7ETH0;G3XAM2;P05156	CFI	Complement factor I	E7ETH0_HUMAN;G3XAM2_HUMAN;CFAI_HUMAN	1	573.091	6.73091	Dengue	QC	NaN	NaN	NaN	39.9882	0.251697
Dengue / QC	_SLPMDHPDSSQHGPPFEGQSQVQPPPSQEATPLQQEK_	Q16610	1.82019	1.82019	1.47444e-14	1.29874e-13	74	Q16610	ECM1	Extracellular matrix protein 1	ECM1_HUMAN	1	253.128	3.53128	Dengue	QC	NaN	NaN	NaN	48.8305	0.147678
Dengue / QC	_C[Carbamidomethyl (C)]FDHAAGTSYVVGETWEKPYQGWMMVDC[Carbamidomethyl (C)]TC[Carbamidomethyl (C)]LGEGSGR_	P02751;P02751-15;P02751-3;P02751-7	1.82222	1.82222	1.48147e-14	1.30299e-13	48	P02751;P02751-15;P02751-3;P02751-7	FN1	Fibronectin;Isoform 15 of Fibronectin;Isoform 3 of Fibronectin;Isoform 7 of Fibronectin	FINC_HUMAN	1	253.624	3.53624	Dengue	QC	NaN	NaN	NaN	40.693	0.151293
Dengue / QC	_MYYSAVEPTKDIFTGLIGPMK_	E9PFZ2	1.69325	1.69325	1.56098e-14	1.36679e-13	92	E9PFZ2	CP	Ceruloplasmin	E9PFZ2_HUMAN	1	223.384	3.23384	Dengue	QC	NaN	NaN	NaN	53.6724	0.143335
Dengue / QC	_GNLLQC[Carbamidomethyl (C)]IC[Carbamidomethyl (C)]TGNGRGEWK_	P02751;P02751-15;P02751-3;P02751-7	1.6564	1.6564	1.71022e-14	1.4908e-13	62	P02751;P02751-15;P02751-3;P02751-7	FN1	Fibronectin;Isoform 15 of Fibronectin;Isoform 3 of Fibronectin;Isoform 7 of Fibronectin	FINC_HUMAN	1	215.228	3.15228	Dengue	QC	NaN	NaN	NaN	55.6231	0.161144
Dengue / QC	_LFLEPTRKDIALLK_	P00747	3.10291	3.10291	1.71417e-14	1.49203e-13	72	P00747	PLG	Plasminogen	PLMN_HUMAN	1	759.152	8.59152	Dengue	QC	NaN	NaN	NaN	46.7539	0.24024
Dengue / QC	_ITTGGDVINNGLWNMVSVEELEHSISIK_	P07225	0.788286	0.788286	1.81112e-14	1.56715e-13	136	P07225	PROS1	Vitamin K-dependent protein S	PROS_HUMAN	1	72.7022	1.72702	Dengue	QC	NaN	NaN	NaN	115.471	0.0927208
Dengue / QC	_DLLPSRDR_	P02671	3.30124	3.30124	1.85816e-14	1.59845e-13	80	P02671	FGA	Fibrinogen alpha chain	FIBA_HUMAN	1	885.763	9.85763	Dengue	QC	NaN	NaN	NaN	61.1504	0.294985
Dengue / QC	_TAGPDQTEM[Oxidation (M)]TIEGLQPTVEYVVSVYAQNPSGESQPLVQTAVTTIPAPTDLK_	P02751-14;P02751-8	0.868343	0.868343	1.94789e-14	1.66832e-13	130	P02751-14;P02751-8	FN1	Isoform 14 of Fibronectin;Isoform 8 of Fibronectin	FINC_HUMAN	1	82.5565	1.82556	Dengue	QC	NaN	NaN	NaN	87.9197	0.17132
Dengue / QC	_VWVYPPEK_	P02790	0.981244	0.981244	2.0274e-14	1.72887e-13	84	P02790	HPX	Hemopexin	HEMO_HUMAN	1	97.4166	1.97417	Dengue	QC	NaN	NaN	NaN	79.543	0.118142
Dengue / QC	_GTLSTTITGR_	P08519	1.4839	1.4839	2.20061e-14	1.86308e-13	112	P08519	LPA	Apolipoprotein(a)	APOA_HUMAN	1	179.704	2.79704	Dengue	QC	NaN	NaN	NaN	85.6294	0.153774
Dengue / QC	_VYC[Carbamidomethyl (C)]DMNTENGGWTVIQNR_	P02675	3.58444	3.58444	2.54242e-14	2.13403e-13	110	P02675	FGB	Fibrinogen beta chain	FIBB_HUMAN	1	1099.57	11.9957	Dengue	QC	NaN	NaN	NaN	74.4795	0.36389
Dengue / QC	_LWAYLTIQELLAKR_	P19827	0.534012	0.534012	2.85357e-14	2.385e-13	114	P19827	ITIH1	Inter-alpha-trypsin inhibitor heavy chain H1	ITIH1_HUMAN	1	44.795	1.44795	Dengue	QC	NaN	NaN	NaN	82.0278	0.126557
Dengue / QC	_YEASILTHDSSIR_	P02679;P02679-2	2.32062	2.32062	2.88197e-14	2.40191e-13	68	P02679;P02679-2	FGG	Fibrinogen gamma chain;Isoform Gamma-A of Fibrinogen gamma chain	FIBG_HUMAN	1	399.547	4.99547	Dengue	QC	NaN	NaN	NaN	45.0895	0.195659
Dengue / QC	_LELELRPTGEIEQYSVSATYELQR_	P04114	0.768278	0.768278	2.92371e-14	2.43325e-13	152	P04114	APOB	Apolipoprotein B-100	APOB_HUMAN	1	70.3236	1.70324	Dengue	QC	NaN	NaN	NaN	127.25	0.0856252
Dengue / QC	_STAAMSTYTGIFTDQVLSVLKGEE_	A0A024R0T9;K7ER74;P02655	0.668851	0.668851	2.93342e-14	2.43788e-13	138	A0A024R0T9;K7ER74;P02655	APOC4-APOC2;APOC4-APOC2;APOC2	Apolipoprotein C-II isoform 1;APOC4-APOC2 readthrough (NMD candidate);Apolipoprotein C-II	A0A024R0T9_HUMAN;K7ER74_HUMAN;APOC2_HUMAN	1	58.9806	1.58981	Dengue	QC	NaN	NaN	NaN	98.6149	0.0724199
Dengue / QC	_SLEYLDLSFNQIAR_	P51884	0.909275	0.909275	2.97198e-14	2.46645e-13	128	P51884	LUM	Lumican	LUM_HUMAN	1	87.8101	1.8781	Dengue	QC	NaN	NaN	NaN	115.181	0.134608
Dengue / QC	_LGFTDLFSK_	P29622	0.574576	0.574576	3.06966e-14	2.53678e-13	68	P29622	SERPINA4	Kallistatin	KAIN_HUMAN	1	48.924	1.48924	Dengue	QC	NaN	NaN	NaN	59.0018	0.0943532
Dengue / QC	_VAQLEAQC[Carbamidomethyl (C)]QEPC[Carbamidomethyl (C)]KDTVQIHDITGK_	P02679;P02679-2	2.50246	2.50246	3.24204e-14	2.67173e-13	90	P02679;P02679-2	FGG	Fibrinogen gamma chain;Isoform Gamma-A of Fibrinogen gamma chain	FIBG_HUMAN	1	466.649	5.66649	Dengue	QC	NaN	NaN	NaN	74.0848	0.253328
Dengue / QC	_SRLLATLC[Carbamidomethyl (C)]SAEVC[Carbamidomethyl (C)]QC[Carbamidomethyl (C)]AEGK_	P0C0L5	2.05175	2.05175	3.39792e-14	2.78459e-13	104	P0C0L5	C4B	Complement C4-B	CO4B_HUMAN	1	314.609	4.14609	Dengue	QC	NaN	NaN	NaN	78.786	0.250694
Dengue / QC	_TAVNALWGK_	P02042	0.458906	0.458906	3.46236e-14	2.83346e-13	108	P02042	HBD	Hemoglobin subunit delta	HBD_HUMAN	1	37.4499	1.3745	Dengue	QC	NaN	NaN	NaN	96.6074	0.0538323
Dengue / QC	_AVVEVDESGTR_	P05154	3.03702	3.03702	3.58738e-14	2.92356e-13	52	P05154	SERPINA5	Plasma serine protease inhibitor	IPSP_HUMAN	1	720.795	8.20795	Dengue	QC	NaN	NaN	NaN	37.4207	0.357634
Dengue / QC	_AE[Carboxy]DTAVYYC[Carbamidomethyl (C)]AK_	A0A0J9YY99	-0.0862692	0.0862692	3.66387e-14	2.98177e-13	106	A0A0J9YY99	NaN	Uncharacterized protein (Fragment)	A0A0J9YY99_HUMAN	1	-5.80445	0.941956	Dengue	QC	NaN	NaN	NaN	48.4296	0.395145
Dengue / QC	_ATWSGAVLAGRDAVLR_	P04217	3.76425	3.76425	4.02004e-14	3.26712e-13	72	P04217	A1BG	Alpha-1B-glycoprotein	A1BG_HUMAN	1	1258.79	13.5879	Dengue	QC	NaN	NaN	NaN	51.4406	0.341514
Dengue / QC	_DYELLC[Carbamidomethyl (C)]LDGTRK_	P02787	2.05365	2.05365	4.06372e-14	3.29524e-13	78	P02787	TF	Serotransferrin	TRFE_HUMAN	1	315.155	4.15155	Dengue	QC	NaN	NaN	NaN	41.0708	0.180391
Dengue / QC	_GSWYSMR_	P02675	2.96882	2.96882	4.36223e-14	3.50647e-13	102	P02675	FGB	Fibrinogen beta chain	FIBB_HUMAN	1	682.895	7.82895	Dengue	QC	NaN	NaN	NaN	76.4434	0.3061
Dengue / QC	_LSRPAVITDK_	P08519	2.29948	2.29948	4.63512e-14	3.71567e-13	44	P08519	LPA	Apolipoprotein(a)	APOA_HUMAN	1	392.279	4.92279	Dengue	QC	NaN	NaN	NaN	23.2981	0.137439
Dengue / QC	_QSGLYFIKPLK_	P02679;P02679-2	3.1497	3.1497	4.7565e-14	3.80261e-13	82	P02679;P02679-2	FGG	Fibrinogen gamma chain;Isoform Gamma-A of Fibrinogen gamma chain	FIBG_HUMAN	1	787.471	8.87471	Dengue	QC	NaN	NaN	NaN	59.2993	0.299758
Dengue / QC	_KKTDELPQLVTLPHPNLHGPEILDVPSTVQK_	P02751;P02751-15;P02751-3;P02751-7	0.700339	0.700339	4.91806e-14	3.91582e-13	146	P02751;P02751-15;P02751-3;P02751-7	FN1	Fibronectin;Isoform 15 of Fibronectin;Isoform 3 of Fibronectin;Isoform 7 of Fibronectin	FINC_HUMAN	1	62.4887	1.62489	Dengue	QC	NaN	NaN	NaN	122.303	0.0868976
Dengue / QC	_LGNQEPGGQTALKSPPGVC[Carbamidomethyl (C)]SRDPTPEQTHR_	P08697	1.70083	1.70083	4.95128e-14	3.93694e-13	76	P08697	SERPINF2	Alpha-2-antiplasmin	A2AP_HUMAN	1	225.087	3.25087	Dengue	QC	NaN	NaN	NaN	62.2191	0.172873
Dengue / QC	_SM[Oxidation (M)]GGKEDLIWELLNQAQEHFGK_	P02787	1.12213	1.12213	4.97053e-14	3.94691e-13	140	P02787	TF	Serotransferrin	TRFE_HUMAN	1	117.668	2.17668	Dengue	QC	NaN	NaN	NaN	131.083	0.11648
Dengue / QC	_ILGDMQPGDYFDLVLFGTR_	P19827	0.821262	0.821262	5.14296e-14	4.0619e-13	110	P19827	ITIH1	Inter-alpha-trypsin inhibitor heavy chain H1	ITIH1_HUMAN	1	76.6951	1.76695	Dengue	QC	NaN	NaN	NaN	38.9815	0.099808
Dengue / QC	_FSGTWYAMAKK_	P02753;Q5VY30	3.22271	3.22271	5.78956e-14	4.53002e-13	46	P02753;Q5VY30	RBP4	Retinol-binding protein 4;Retinol binding protein 4, plasma, isoform CRA_b	RET4_HUMAN;Q5VY30_HUMAN	1	833.54	9.3354	Dengue	QC	NaN	NaN	NaN	39.0093	0.22649
Dengue / QC	_ELLALIQLER_	Q16610	0.880254	0.880254	5.89344e-14	4.60518e-13	168	Q16610	ECM1	Extracellular matrix protein 1	ECM1_HUMAN	1	84.0699	1.8407	Dengue	QC	NaN	NaN	NaN	150.407	0.094626
Dengue / QC	_LLIYDASNRATGIPAR_	P04433	5.09011	5.09011	6.00153e-14	4.67722e-13	56	P04433	IGKV3-11	Immunoglobulin kappa variable 3-11	KV311_HUMAN	1	3306.25	34.0625	Dengue	QC	NaN	NaN	NaN	31.3444	0.382493
Dengue / QC	_MKPVPDLVPGNFK_	P02671	3.40088	3.40088	6.02766e-14	4.69137e-13	88	P02671	FGA	Fibrinogen alpha chain	FIBA_HUMAN	1	956.248	10.5625	Dengue	QC	NaN	NaN	NaN	65.2323	0.333336
Dengue / QC	_TAMDVFVC[Carbamidomethyl (C)]TYFM[Oxidation (M)]PAAQLPELPDVELPTNK_	P02774;P02774-3	1.68407	1.68407	6.15965e-14	4.78776e-13	26	P02774;P02774-3	GC	Vitamin D-binding protein;Isoform 3 of Vitamin D-binding protein	VTDB_HUMAN	1	221.334	3.21334	Dengue	QC	NaN	NaN	NaN	13.9361	0.152003
Dengue / QC	_INC[Carbamidomethyl (C)]QGKTYLFKGSQYWR_	P04004	2.45677	2.45677	6.2093e-14	4.8163e-13	56	P04004	VTN	Vitronectin	VTNC_HUMAN	1	448.988	5.48988	Dengue	QC	NaN	NaN	NaN	45.2786	0.19654
Dengue / QC	_GGETAQSADPQWEQLNNK_	P05546	0.575873	0.575873	6.25835e-14	4.83257e-13	102	P05546	SERPIND1	Heparin cofactor 2	HEP2_HUMAN	1	49.0579	1.49058	Dengue	QC	NaN	NaN	NaN	49.6659	0.0689434
Dengue / QC	_TMTIHNGMFFSTYDRDNDGWLTSDPR_	P02675	3.10148	3.10148	6.2525e-14	4.83257e-13	32	P02675	FGB	Fibrinogen beta chain	FIBB_HUMAN	1	758.296	8.58296	Dengue	QC	NaN	NaN	NaN	23.9875	0.181874
Dengue / QC	_QGFGNVATNTDGK_	P02675	2.54544	2.54544	6.29615e-14	4.85538e-13	112	P02675	FGB	Fibrinogen beta chain	FIBB_HUMAN	1	483.787	5.83787	Dengue	QC	NaN	NaN	NaN	76.1612	0.281986
Dengue / QC	_TPENYPNAGLTMNYC[Carbamidomethyl (C)]RNPDADKGPWC[Carbamidomethyl (C)]FTTDPSVR_	P00747	1.67672	1.67672	6.56883e-14	5.05903e-13	80	P00747	PLG	Plasminogen	PLMN_HUMAN	1	219.701	3.19701	Dengue	QC	NaN	NaN	NaN	63.4627	0.181227
Dengue / QC	_D[Carboxy]LC[Carbamidomethyl (C)]GC[Carbamidomethyl (C)]YSVSSVLPGC[Carbamidomethyl (C)]AEPWNHGK_	P01876	1.11781	1.11781	6.80589e-14	5.23475e-13	162	P01876	IGHA1	Immunoglobulin heavy constant alpha 1	IGHA1_HUMAN	1	117.018	2.17018	Dengue	QC	NaN	NaN	NaN	73.197	0.547157
Dengue / QC	_HTASAWLM[Oxidation (M)]SAPNSGPHNR_	Q96PD5	0.303783	0.303783	7.15629e-14	5.48991e-13	38	Q96PD5	PGLYRP2	N-acetylmuramoyl-L-alanine amidase	PGRP2_HUMAN	1	23.4377	1.23438	Dengue	QC	NaN	NaN	NaN	16.8312	0.301491
Dengue / QC	_MGPSSAVPGDSMQLAITGGNEEGFFTTR_	P23142-4	1.21357	1.21357	7.18966e-14	5.50833e-13	114	P23142-4	FBLN1	Isoform C of Fibulin-1	FBLN1_HUMAN	1	131.911	2.31911	Dengue	QC	NaN	NaN	NaN	99.9945	0.13839
Dengue / QC	_TPKSPVGVQPILNEHTFC[Carbamidomethyl (C)]AGMSK_	P00738	2.9342	2.9342	7.28605e-14	5.56768e-13	100	P00738	HP	Haptoglobin	HPT_HUMAN	1	664.33	7.6433	Dengue	QC	NaN	NaN	NaN	60.824	0.292978
Dengue / QC	_KWQEEM[Oxidation (M)]ELYR_	P02647	0.834868	0.834868	7.4047e-14	5.651e-13	90	P02647	APOA1	Apolipoprotein A-I	APOA1_HUMAN	1	78.3694	1.78369	Dengue	QC	NaN	NaN	NaN	76.3277	0.081444
Dengue / QC	_IADVTSGLIGGEDGR_	P80108	0.377754	0.377754	7.49659e-14	5.69896e-13	160	P80108	GPLD1	Phosphatidylinositol-glycan-specific phospholipase D	PHLD_HUMAN	1	29.9318	1.29932	Dengue	QC	NaN	NaN	NaN	151.468	0.056647
Dengue / QC	_GLQDEDGYRMK_	P0C0L5	3.87201	3.87201	7.69834e-14	5.83959e-13	72	P0C0L5	C4B	Complement C4-B	CO4B_HUMAN	1	1364.17	14.6417	Dengue	QC	NaN	NaN	NaN	47.4287	0.343827
Dengue / QC	_GM[Oxidation (M)]TRPLSTLISSSQSC[Carbamidomethyl (C)]QYTLDAK_	P04114	1.18721	1.18721	7.70143e-14	5.83959e-13	40	P04114	APOB	Apolipoprotein B-100	APOB_HUMAN	1	127.712	2.27712	Dengue	QC	NaN	NaN	NaN	23.8911	0.0650384
Dengue / QC	_VNWEEEAASGLLTSLKDNVPK_	P04114	0.741574	0.741574	9.02331e-14	6.72065e-13	116	P04114	APOB	Apolipoprotein B-100	APOB_HUMAN	1	67.2	1.672	Dengue	QC	NaN	NaN	NaN	91.4621	0.0909668
Dengue / QC	_DKGQAGLQR_	P0C0L5	1.34508	1.34508	9.08004e-14	6.75435e-13	96	P0C0L5	C4B	Complement C4-B	CO4B_HUMAN	1	154.044	2.54044	Dengue	QC	NaN	NaN	NaN	90.1005	0.156708
Dengue / QC	_MC[Carbamidomethyl (C)]VDVNEC[Carbamidomethyl (C)]QRYPGR_	P23142	3.05731	3.05731	9.22476e-14	6.83608e-13	98	P23142	FBLN1	Fibulin-1	FBLN1_HUMAN	1	732.422	8.32422	Dengue	QC	NaN	NaN	NaN	73.587	0.31014
Dengue / QC	_WDPYKQGFGNVATNTDGK_	P02675	2.16557	2.16557	9.50735e-14	6.99266e-13	38	P02675	FGB	Fibrinogen beta chain	FIBB_HUMAN	1	348.643	4.48643	Dengue	QC	NaN	NaN	NaN	33.003	0.167773
Dengue / QC	_EWFWDLATGTMKER_	P02790	0.588204	0.588204	9.73492e-14	7.15109e-13	130	P02790	HPX	Hemopexin	HEMO_HUMAN	1	50.3374	1.50337	Dengue	QC	NaN	NaN	NaN	68.7151	0.0701975
Dengue / QC	_M[Oxidation (M)]KPVPDLVPGNFK_	P02671	2.65097	2.65097	1.11494e-13	8.08916e-13	32	P02671	FGA	Fibrinogen alpha chain	FIBA_HUMAN	1	528.088	6.28088	Dengue	QC	NaN	NaN	NaN	23.6557	0.152834
Dengue / QC	_QSNNKYAASSYLSLTPEQWKSHR_	P0DOY2	3.57788	3.57788	1.13301e-13	8.21013e-13	82	P0DOY2	IGLC2	Immunoglobulin lambda constant 2	IGLC2_HUMAN	1	1094.12	11.9412	Dengue	QC	NaN	NaN	NaN	58.1874	0.320977
Dengue / QC	_MGPTELLIEMEDWKGDKVK_	P02675	4.8456	4.8456	1.19235e-13	8.61888e-13	48	P02675	FGB	Fibrinogen beta chain	FIBB_HUMAN	1	2775.22	28.7522	Dengue	QC	NaN	NaN	NaN	32.2625	0.319341
Dengue / QC	_RIFSPFADLSELSATGR_	G3V2W1;Q9UK55	1.07418	1.07418	1.30989e-13	9.39926e-13	46	G3V2W1;Q9UK55	SERPINA10	Protein Z-dependent protease inhibitor	G3V2W1_HUMAN;ZPI_HUMAN	1	110.553	2.10553	Dengue	QC	NaN	NaN	NaN	40.0296	0.0904459
Dengue / QC	_YLFPGEC[Carbamidomethyl (C)]QYVLVQDYC[Carbamidomethyl (C)]GSNPGTFR_	P04275	1.43721	1.43721	1.33073e-13	9.52556e-13	80	P04275	VWF	von Willebrand factor	VWF_HUMAN	1	170.797	2.70797	Dengue	QC	NaN	NaN	NaN	71.3989	0.176543
Dengue / QC	_NTDNIIYPEEYSSC[Carbamidomethyl (C)]SR_	Q13201	0.594229	0.594229	1.37029e-13	9.77311e-13	30	Q13201	MMRN1	Multimerin-1	MMRN1_HUMAN	1	50.9666	1.50967	Dengue	QC	NaN	NaN	NaN	12.1306	0.173327
Dengue / QC	_C[Carbamidomethyl (C)]PAPELLGGPSVFLFPPKPKDTLMISR_	P01860	3.67425	3.67425	1.38736e-13	9.88282e-13	34	P01860	IGHG3	Immunoglobulin heavy constant gamma 3	IGHG3_HUMAN	1	1176.61	12.7661	Dengue	QC	NaN	NaN	NaN	23.5512	0.221478
Dengue / QC	_VLTGNPRLDLQEINNWVQAQMKGK_	P36955	1.28567	1.28567	1.45345e-13	1.03162e-12	76	P36955	SERPINF1	Pigment epithelium-derived factor	PEDF_HUMAN	1	143.796	2.43796	Dengue	QC	NaN	NaN	NaN	59.6912	0.111102
Dengue / QC	_SASDLTWDNLKGKK_	P02787	3.84248	3.84248	1.47219e-13	1.04366e-12	76	P02787	TF	Serotransferrin	TRFE_HUMAN	1	1334.51	14.3451	Dengue	QC	NaN	NaN	NaN	45.4704	0.340408
Dengue / QC	_NFATSNKM[Oxidation (M)]DMTFSK_	P04114	1.13355	1.13355	1.79403e-13	1.25668e-12	40	P04114	APOB	Apolipoprotein B-100	APOB_HUMAN	1	119.398	2.19398	Dengue	QC	NaN	NaN	NaN	24.2434	0.0995075
Dengue / QC	_REEAPSLRPAPPPISGGGYR_	P02675	3.28956	3.28956	1.91877e-13	1.33941e-12	78	P02675	FGB	Fibrinogen beta chain	FIBB_HUMAN	1	877.813	9.77813	Dengue	QC	NaN	NaN	NaN	63.8441	0.298194
Dengue / QC	_QGDVEC[Carbamidomethyl (C)]QRTEC[Carbamidomethyl (C)]IKPVVQEVLTITPFQR_	P13671	3.79534	3.79534	1.91897e-13	1.33941e-12	36	P13671	C6	Complement component C6	CO6_HUMAN	1	1288.39	13.8839	Dengue	QC	NaN	NaN	NaN	24.0377	0.272749
Dengue / QC	_YLGEEYVKAVGNLRK_	P02787	2.11171	2.11171	1.93588e-13	1.34801e-12	122	P02787	TF	Serotransferrin	TRFE_HUMAN	1	332.204	4.32204	Dengue	QC	NaN	NaN	NaN	92.0158	0.235727
Dengue / QC	_LPQQANDYLNSFNWER_	P04114	1.16147	1.16147	1.95572e-13	1.36022e-12	46	P04114	APOB	Apolipoprotein B-100	APOB_HUMAN	1	123.686	2.23686	Dengue	QC	NaN	NaN	NaN	40.6692	0.11541
Dengue / QC	_VRAATVGSLAGQPLQER_	P02649	0.665713	0.665713	2.18627e-13	1.51164e-12	74	P02649	APOE	Apolipoprotein E	APOE_HUMAN	1	58.6352	1.58635	Dengue	QC	NaN	NaN	NaN	66.3111	0.126096
Dengue / QC	_ALDYYMLR_	Q9Y490	1.49042	1.49042	2.23616e-13	1.54431e-12	42	Q9Y490	TLN1	Talin-1	TLN1_HUMAN	1	180.97	2.8097	Dengue	QC	NaN	NaN	NaN	33.4964	0.128429
Dengue / QC	_AHYGGFTVQNEANK_	P02675	3.02444	3.02444	2.25154e-13	1.55312e-12	70	P02675	FGB	Fibrinogen beta chain	FIBB_HUMAN	1	713.671	8.13671	Dengue	QC	NaN	NaN	NaN	55.6802	0.26347
Dengue / QC	_C[Carbamidomethyl (C)]YFPYLENGYNQNYGR_	P08603	0.679838	0.679838	2.30444e-13	1.58588e-12	106	P08603	CFH	Complement factor H	CFAH_HUMAN	1	60.196	1.60196	Dengue	QC	NaN	NaN	NaN	78.4084	0.0760104
Dengue / QC	_VNIPLVTNEEC[Carbamidomethyl (C)]QK_	H0YAC1;P03952	1.25059	1.25059	2.39464e-13	1.64411e-12	42	H0YAC1;P03952	KLKB1	Plasma kallikrein (Fragment);Plasma kallikrein	H0YAC1_HUMAN;KLKB1_HUMAN	1	137.939	2.37939	Dengue	QC	NaN	NaN	NaN	30.3731	0.114063
Dengue / QC	_WDPYKQGFGNVATNTDGKNYC[Carbamidomethyl (C)]GLPGEYWLGNDK_	P02675	3.10454	3.10454	2.44566e-13	1.67719e-12	28	P02675	FGB	Fibrinogen beta chain	FIBB_HUMAN	1	760.119	8.60119	Dengue	QC	NaN	NaN	NaN	19.3676	0.157402
Dengue / QC	_FSDEGTHESQISFTIEGPLTSFGLSNK_	P04114	1.05314	1.05314	2.56932e-13	1.75994e-12	96	P04114	APOB	Apolipoprotein B-100	APOB_HUMAN	1	107.504	2.07504	Dengue	QC	NaN	NaN	NaN	74.665	0.140292
Dengue / QC	_ETYDFDIAVLR_	P00742	0.803405	0.803405	2.69828e-13	1.84184e-12	140	P00742	F10	Coagulation factor X	FA10_HUMAN	1	74.5215	1.74522	Dengue	QC	NaN	NaN	NaN	71.7339	0.0909768
Dengue / QC	_GIETGSEDLEILPNGLAFISSGLK_	P27169	0.755808	0.755808	2.70992e-13	1.84765e-12	168	P27169	PON1	Serum paraoxonase/arylesterase 1	PON1_HUMAN	1	68.8577	1.68858	Dengue	QC	NaN	NaN	NaN	111.076	0.0849318
Dengue / QC	_RVELKTPLGDTTHTC[Carbamidomethyl (C)]PR_	P01860	3.52422	3.52422	2.75428e-13	1.87571e-12	68	P01860	IGHG3	Immunoglobulin heavy constant gamma 3	IGHG3_HUMAN	1	1050.52	11.5052	Dengue	QC	NaN	NaN	NaN	44.8149	0.329427
Dengue / QC	_GWSPTPR_	Q02985;Q02985-2	1.51408	1.51408	2.80115e-13	1.90543e-12	52	Q02985;Q02985-2	CFHR3	Complement factor H-related protein 3;Isoform 2 of Complement factor H-related protein 3	FHR3_HUMAN	1	185.616	2.85616	Dengue	QC	NaN	NaN	NaN	46.6505	0.139869
Dengue / QC	_HYYESEVLAMNFQDWATASR_	P08185	1.09605	1.09605	2.96324e-13	2.01336e-12	44	P08185	SERPINA6	Corticosteroid-binding globulin	CBG_HUMAN	1	113.768	2.13768	Dengue	QC	NaN	NaN	NaN	38.3694	0.115112
Dengue / QC	_LSFYYLIMAK_	P01023	1.04131	1.04131	3.00221e-13	2.0328e-12	122	P01023	A2M	Alpha-2-macroglobulin	A2MG_HUMAN	1	105.809	2.05809	Dengue	QC	NaN	NaN	NaN	106.952	0.132799
Dengue / QC	_QLFALYSGNDVTDISDDRFPKPPEIANGYVEHLFR_	P00739	1.55282	1.55282	3.00175e-13	2.0328e-12	44	P00739	HPR	Haptoglobin-related protein	HPTR_HUMAN	1	193.391	2.93391	Dengue	QC	NaN	NaN	NaN	30.6605	0.14458
Dengue / QC	_LLSHC[Carbamidomethyl (C)]LLVTLAAHLPAEFTPAVHASLDKFLASVSTVLTSKYR_	P69905	3.60231	3.60231	3.03372e-13	2.05177e-12	42	P69905	HBA1	Hemoglobin subunit alpha	HBA_HUMAN	1	1114.52	12.1452	Dengue	QC	NaN	NaN	NaN	20.6583	0.173779
Dengue / QC	_HGTDDGVVWM[Oxidation (M)]NWK_	P02675	2.44882	2.44882	3.14714e-13	2.12311e-12	46	P02675	FGB	Fibrinogen beta chain	FIBB_HUMAN	1	445.97	5.4597	Dengue	QC	NaN	NaN	NaN	40.6787	0.203481
Dengue / QC	_TC[Carbamidomethyl (C)]QSWSSMTPHWHQR_	P08519	2.50727	2.50727	3.2088e-13	2.16025e-12	62	P08519	LPA	Apolipoprotein(a)	APOA_HUMAN	1	468.543	5.68543	Dengue	QC	NaN	NaN	NaN	47.2616	0.245147
Dengue / QC	_AQMDLSGR_	P00488	2.52362	2.52362	3.27221e-13	2.19791e-12	32	P00488	F13A1	Coagulation factor XIII A chain	F13A_HUMAN	1	475.022	5.75022	Dengue	QC	NaN	NaN	NaN	26.7091	0.195958
Dengue / QC	_SIAQYWLGC[Carbamidomethyl (C)]PAPGHL_	P04004	0.796212	0.796212	3.40079e-13	2.27907e-12	176	P04004	VTN	Vitronectin	VTNC_HUMAN	1	73.6536	1.73654	Dengue	QC	NaN	NaN	NaN	118.504	0.08868
Dengue / QC	_NNNEKDM[Oxidation (M)]ALTAFVLISLQEAK_	P01024	-0.854869	0.854869	3.40788e-13	2.28123e-12	32	P01024	C3	Complement C3	CO3_HUMAN	1	-44.7084	0.552916	Dengue	QC	NaN	NaN	NaN	15.4316	0.334597
Dengue / QC	_LWAYLTINQLLAER_	P19823	1.25358	1.25358	3.41989e-13	2.28666e-12	68	P19823	ITIH2	Inter-alpha-trypsin inhibitor heavy chain H2	ITIH2_HUMAN	1	138.432	2.38432	Dengue	QC	NaN	NaN	NaN	47.7766	0.210051
Dengue / QC	_LKC[Carbamidomethyl (C)]QPVDC[Carbamidomethyl (C)]GIPESIENGKVEDPESTLFGSVIR_	P09871	1.69991	1.69991	3.7591e-13	2.49596e-12	58	P09871	C1S	Complement C1s subcomponent	C1S_HUMAN	1	224.88	3.2488	Dengue	QC	NaN	NaN	NaN	47.0271	0.195306
Dengue / QC	_WERPFEVKDTEEEDFHVDQVTTVK_	P01009	1.06874	1.06874	3.89459e-13	2.56981e-12	88	P01009	SERPINA1	Alpha-1-antitrypsin	A1AT_HUMAN	1	109.759	2.09759	Dengue	QC	NaN	NaN	NaN	60.026	0.114093
Dengue / QC	_VAQLEAQC[Carbamidomethyl (C)]QEPC[Carbamidomethyl (C)]KDTVQIHDITGKDC[Carbamidomethyl (C)]QDIANK_	P02679;P02679-2	2.53084	2.53084	4.04296e-13	2.66391e-12	50	P02679;P02679-2	FGG	Fibrinogen gamma chain;Isoform Gamma-A of Fibrinogen gamma chain	FIBG_HUMAN	1	477.906	5.77906	Dengue	QC	NaN	NaN	NaN	41.0377	0.227263
Dengue / QC	_LDGSVDFKK_	P02679;P02679-2	3.17837	3.17837	4.05331e-13	2.66775e-12	24	P02679;P02679-2	FGG	Fibrinogen gamma chain;Isoform Gamma-A of Fibrinogen gamma chain	FIBG_HUMAN	1	805.282	9.05282	Dengue	QC	NaN	NaN	NaN	19.1934	0.158682
Dengue / QC	_YTIAALLSPYSYSTTAVVTNPK_	P02766	0.948483	0.948483	4.0974e-13	2.69375e-12	70	P02766	TTR	Transthyretin	TTHY_HUMAN	1	92.9843	1.92984	Dengue	QC	NaN	NaN	NaN	35.1811	0.0852524
Dengue / QC	_ILLM[Oxidation (M)]DLNEEDPTVLELGITGSK_	P27169	0.687569	0.687569	4.47435e-13	2.91874e-12	52	P27169	PON1	Serum paraoxonase/arylesterase 1	PON1_HUMAN	1	61.0567	1.61057	Dengue	QC	NaN	NaN	NaN	30.3151	0.23991
Dengue / QC	_GDMFLVANLGTK_	P43251;P43251-2;P43251-3;P43251-4	0.838676	0.838676	4.73102e-13	3.07595e-12	74	P43251;P43251-2;P43251-3;P43251-4	BTD	Biotinidase;Isoform 2 of Biotinidase;Isoform 3 of Biotinidase;Isoform 4 of Biotinidase	BTD_HUMAN	1	78.8408	1.78841	Dengue	QC	NaN	NaN	NaN	59.4255	0.0914895
Dengue / QC	_YRGDQDATMSILDISMMTGFAPDTDDLKQLANGVDR_	P01024	0.798152	0.798152	5.52764e-13	3.55849e-12	130	P01024	C3	Complement C3	CO3_HUMAN	1	73.8872	1.73887	Dengue	QC	NaN	NaN	NaN	98.8067	0.0978463
Dengue / QC	_EYVLPHFSVSIEPEYNFIGYK_	P01031	1.07396	1.07396	5.62469e-13	3.61307e-12	94	P01031	C5	Complement C5	CO5_HUMAN	1	110.52	2.1052	Dengue	QC	NaN	NaN	NaN	77.4666	0.133155
Dengue / QC	_LTYTNWNEGEPNNAGSDEDC[Carbamidomethyl (C)]VLLLK_	P11226	1.79919	1.79919	5.79677e-13	3.71954e-12	46	P11226	MBL2	Mannose-binding protein C	MBL2_HUMAN	1	248.024	3.48024	Dengue	QC	NaN	NaN	NaN	23.656	0.120914
Dengue / QC	_VTIMWTPPESAVTGYRVDVIPVNLPGEHGQR_	P02751;P02751-15;P02751-3;P02751-7	0.497391	0.497391	6.32861e-13	4.05196e-12	156	P02751;P02751-15;P02751-3;P02751-7	FN1	Fibronectin;Isoform 15 of Fibronectin;Isoform 3 of Fibronectin;Isoform 7 of Fibronectin	FINC_HUMAN	1	41.1658	1.41166	Dengue	QC	NaN	NaN	NaN	120.469	0.0787872
Dengue / QC	_APNHAVVTRK_	P02787	1.35436	1.35436	6.68389e-13	4.25168e-12	96	P02787	TF	Serotransferrin	TRFE_HUMAN	1	155.684	2.55684	Dengue	QC	NaN	NaN	NaN	61.307	0.147936
Dengue / QC	_AQYVLISPEASSR_	P80108	0.363299	0.363299	6.69814e-13	4.25614e-12	170	P80108	GPLD1	Phosphatidylinositol-glycan-specific phospholipase D	PHLD_HUMAN	1	28.6364	1.28636	Dengue	QC	NaN	NaN	NaN	143.722	0.0565606
Dengue / QC	_C[Carbamidomethyl (C)]STSSLLEAC[Carbamidomethyl (C)]TFRRP_	P02787	3.55809	3.55809	6.79369e-13	4.30755e-12	106	P02787	TF	Serotransferrin	TRFE_HUMAN	1	1077.85	11.7785	Dengue	QC	NaN	NaN	NaN	70.8973	0.362117
Dengue / QC	_DLLAGLPAPGVEVYC[Carbamidomethyl (C)]LYGVGLPTPR_	P04180	0.780644	0.780644	7.73686e-13	4.86884e-12	82	P04180	LCAT	Phosphatidylcholine-sterol acyltransferase	LCAT_HUMAN	1	71.7898	1.7179	Dengue	QC	NaN	NaN	NaN	33.0227	0.0846563
Dengue / QC	_KLVPFATELHER_	P06727	0.746814	0.746814	7.83907e-13	4.9279e-12	114	P06727	APOA4	Apolipoprotein A-IV	APOA4_HUMAN	1	67.8083	1.67808	Dengue	QC	NaN	NaN	NaN	108.366	0.0847753
Dengue / QC	_QLVHHFEIDVDIFEPQGISK_	P19827	0.98815	0.98815	7.92717e-13	4.97796e-12	166	P19827	ITIH1	Inter-alpha-trypsin inhibitor heavy chain H1	ITIH1_HUMAN	1	98.364	1.98364	Dengue	QC	NaN	NaN	NaN	102.574	0.0942128
Dengue / QC	_DGRWQSIPLC[Carbamidomethyl (C)]VEK_	P08603	2.22834	2.22834	8.18771e-13	5.13062e-12	32	P08603	CFH	Complement factor H	CFAH_HUMAN	1	368.595	4.68595	Dengue	QC	NaN	NaN	NaN	25.9896	0.148151
Dengue / QC	_AKGQPREPQVYTLPPSQEEMTK_	P01861	1.09255	1.09255	8.32106e-13	5.20309e-12	162	P01861	IGHG4	Immunoglobulin heavy constant gamma 4	IGHG4_HUMAN	1	113.25	2.1325	Dengue	QC	NaN	NaN	NaN	146.206	0.119405
Dengue / QC	_EPAHLMSLFGGKPMIIYKGGTSR_	P06396	0.694697	0.694697	8.36552e-13	5.22534e-12	94	P06396	GSN	Gelsolin	GELS_HUMAN	1	61.8544	1.61854	Dengue	QC	NaN	NaN	NaN	85.7993	0.12079
Dengue / QC	_HVSSPLASYFLSFPYAR_	P80108	1.05841	1.05841	8.54734e-13	5.3276e-12	88	P80108	GPLD1	Phosphatidylinositol-glycan-specific phospholipase D	PHLD_HUMAN	1	108.263	2.08263	Dengue	QC	NaN	NaN	NaN	32.8724	0.104859
Dengue / QC	_QTVNLQLQPYSLVTTLNSDLK_	P04114	1.15106	1.15106	9.24982e-13	5.74719e-12	124	P04114	APOB	Apolipoprotein B-100	APOB_HUMAN	1	122.078	2.22078	Dengue	QC	NaN	NaN	NaN	73.2623	0.0997565
Dengue / QC	_LYIEYGIQR_	Q9NPH3;Q9NPH3-2;Q9NPH3-5	0.773796	0.773796	9.31527e-13	5.78176e-12	64	Q9NPH3;Q9NPH3-2;Q9NPH3-5	IL1RAP	Interleukin-1 receptor accessory protein;Isoform 2 of Interleukin-1 receptor accessory protein;Isoform 4 of Interleukin-1 receptor accessory protein	IL1AP_HUMAN	1	70.9762	1.70976	Dengue	QC	NaN	NaN	NaN	47.3884	0.116516
Dengue / QC	_SMGGKEDLIWELLNQAQEHFGK_	P02787	1.01201	1.01201	9.64621e-13	5.97456e-12	170	P02787	TF	Serotransferrin	TRFE_HUMAN	1	101.672	2.01672	Dengue	QC	NaN	NaN	NaN	114.837	0.154576
Dengue / QC	_GISTSAASPAVGTVGMDMDEDDDFSKWNFYYSPQSSPDKK_	P04114	1.04815	1.04815	1.00485e-12	6.21064e-12	104	P04114	APOB	Apolipoprotein B-100	APOB_HUMAN	1	106.787	2.06787	Dengue	QC	NaN	NaN	NaN	77.4	0.134106
Dengue / QC	_ANPTVTLFPPSSEELQANKATLVC[Carbamidomethyl (C)]LISDFYPGAVTVAWKADGSPVK_	A0A0B4J231;B9A064	1.93155	1.93155	1.02254e-12	6.31338e-12	64	A0A0B4J231;B9A064	IGLL5	Immunoglobulin lambda-like polypeptide 5	A0A0B4J231_HUMAN;IGLL5_HUMAN	1	281.464	3.81464	Dengue	QC	NaN	NaN	NaN	49.2545	0.244906
Dengue / QC	_GYSFTTTAER_	P60709	1.3887	1.3887	1.04564e-12	6.44248e-12	18	P60709	ACTB	Actin, cytoplasmic 1	ACTB_HUMAN	1	161.843	2.61843	Dengue	QC	NaN	NaN	NaN	9.40396	0.133411
Dengue / QC	_IYEDHDATQQLQGFYSQVAKPLLVDVDLQYPQDAVLALTQNHHK_	P19827	0.713038	0.713038	1.08091e-12	6.64586e-12	176	P19827	ITIH1	Inter-alpha-trypsin inhibitor heavy chain H1	ITIH1_HUMAN	1	63.9253	1.63925	Dengue	QC	NaN	NaN	NaN	121.595	0.0800467
Dengue / QC	_PGSAPTTVIYEDNQRPSGVPDR_	P01721	1.20696	1.20696	1.08372e-12	6.65619e-12	46	P01721	IGLV6-57	Immunoglobulin lambda variable 6-57	LV657_HUMAN	1	130.85	2.3085	Dengue	QC	NaN	NaN	NaN	39.9716	0.139194
Dengue / QC	_LEALPNSLLAPLGR_	P35858;P35858-2	0.600887	0.600887	1.14853e-12	7.03224e-12	80	P35858;P35858-2	IGFALS	Insulin-like growth factor-binding protein complex acid labile subunit;Isoform 2 of Insulin-like growth factor-binding protein complex acid labile subunit	ALS_HUMAN	1	51.6649	1.51665	Dengue	QC	NaN	NaN	NaN	61.7589	0.0887033
Dengue / QC	_C[Carbamidomethyl (C)]VLFPYGGC[Carbamidomethyl (C)]QGNGNKFYSEKEC[Carbamidomethyl (C)]R_	P02760	2.16394	2.16394	1.15409e-12	7.05888e-12	34	P02760	AMBP	Protein AMBP	AMBP_HUMAN	1	348.137	4.48137	Dengue	QC	NaN	NaN	NaN	27.5135	0.198411
Dengue / QC	_NLC[Carbamidomethyl (C)]EAMENFMQQLK_	P20851;P20851-2	1.38487	1.38487	1.1565e-12	7.06628e-12	40	P20851;P20851-2	C4BPB	C4b-binding protein beta chain;Isoform 2 of C4b-binding protein beta chain	C4BPB_HUMAN	1	161.148	2.61148	Dengue	QC	NaN	NaN	NaN	16.7803	0.222031
Dengue / QC	_GSFSTTVTGR_	P08519	1.53029	1.53029	1.15825e-12	7.06966e-12	134	P08519	LPA	Apolipoprotein(a)	APOA_HUMAN	1	188.845	2.88845	Dengue	QC	NaN	NaN	NaN	118.13	0.193281
Dengue / QC	_AHLNIKSPAFTDLHLR_	P04114	4.21301	4.21301	1.17243e-12	7.13483e-12	32	P04114	APOB	Apolipoprotein B-100	APOB_HUMAN	1	1754.56	18.5456	Dengue	QC	NaN	NaN	NaN	26.7023	0.285906
Dengue / QC	_EDGGGWWYNR_	P02675	2.94952	2.94952	1.19499e-12	7.2413e-12	110	P02675	FGB	Fibrinogen beta chain	FIBB_HUMAN	1	672.493	7.72493	Dengue	QC	NaN	NaN	NaN	80.5074	0.326195
Dengue / QC	_WFLLEQPEIQVAHFPFK_	P08697	1.54584	1.54584	1.22086e-12	7.39048e-12	22	P08697	SERPINF2	Alpha-2-antiplasmin	A2AP_HUMAN	1	191.974	2.91974	Dengue	QC	NaN	NaN	NaN	11.2871	0.135631
Dengue / QC	_DKDQEVLLQTFLDDASPGDK_	P04114	0.867228	0.867228	1.25925e-12	7.61504e-12	80	P04114	APOB	Apolipoprotein B-100	APOB_HUMAN	1	82.4155	1.82415	Dengue	QC	NaN	NaN	NaN	45.0701	0.099285
Dengue / QC	_AGAAPYVQAFDSLLAGPVAEYLK_	Q01518;Q5T0R1;Q5T0R2;Q5T0R3;Q5T0R4;Q5T0R5;Q5T0R6;Q5T0R7	1.33665	1.33665	1.28957e-12	7.78241e-12	38	Q01518;Q5T0R1;Q5T0R2;Q5T0R3;Q5T0R4;Q5T0R5;Q5T0R6;Q5T0R7	CAP1	Adenylyl cyclase-associated protein 1;Adenylyl cyclase-associated protein 1 (Fragment);Adenylyl cyclase-associated protein 1 (Fragment);Adenylyl cyclase-associated protein 1 (Fragment);Adenylyl cyclase-associated protein 1 (Fragment);Adenylyl cyclase-associated protein 1 (Fragment);Adenylyl cyclase-associated protein 1 (Fragment);Adenylyl cyclase-associated protein 1 (Fragment)	CAP1_HUMAN;Q5T0R1_HUMAN;Q5T0R2_HUMAN;Q5T0R3_HUMAN;Q5T0R4_HUMAN;Q5T0R5_HUMAN;Q5T0R6_HUMAN;Q5T0R7_HUMAN	1	152.564	2.52564	Dengue	QC	NaN	NaN	NaN	26.2709	0.133191
Dengue / QC	_TEDTIFLR_	P19652	-0.622742	0.622742	1.32663e-12	7.98965e-12	176	P19652	ORM2	Alpha-1-acid glycoprotein 2	A1AG2_HUMAN	1	-35.0565	0.649435	Dengue	QC	NaN	NaN	NaN	92.9338	0.0791659
Dengue / QC	_VINLPLDSMAAPWETGDTFPDVVAIAPDVR_	Q96PD5	0.749586	0.749586	1.4129e-12	8.48318e-12	146	Q96PD5	PGLYRP2	N-acetylmuramoyl-L-alanine amidase	PGRP2_HUMAN	1	68.131	1.68131	Dengue	QC	NaN	NaN	NaN	130.901	0.0833759
Dengue / QC	_SVPMVPPGIKYLYLR_	P51884	3.70821	3.70821	1.51433e-12	9.05517e-12	32	P51884	LUM	Lumican	LUM_HUMAN	1	1207.02	13.0702	Dengue	QC	NaN	NaN	NaN	19.3824	0.296734
Dengue / QC	_AHYGGFTVQNEANKYQISVNKYR_	P02675	2.06157	2.06157	1.52449e-12	9.10669e-12	48	P02675	FGB	Fibrinogen beta chain	FIBB_HUMAN	1	317.441	4.17441	Dengue	QC	NaN	NaN	NaN	43.1544	0.206159
Dengue / QC	_HYEGSTVPEKKTPK_	P00738	5.95557	5.95557	1.53598e-12	9.16601e-12	30	P00738	HP	Haptoglobin	HPT_HUMAN	1	6105.9	62.059	Dengue	QC	NaN	NaN	NaN	17.43	0.261548
Dengue / QC	_VAC[Carbamidomethyl (C)]EEPPFIENGAANLHSK_	P05160	0.561836	0.561836	1.58429e-12	9.43519e-12	86	P05160	F13B	Coagulation factor XIII B chain	F13B_HUMAN	1	47.6147	1.47615	Dengue	QC	NaN	NaN	NaN	56.4467	0.0683727
Dengue / QC	_SNRVTVFPIGIGDRYDAAQLR_	P04275	1.46539	1.46539	1.66711e-12	9.88837e-12	96	P04275	VWF	von Willebrand factor	VWF_HUMAN	1	176.138	2.76138	Dengue	QC	NaN	NaN	NaN	67.2319	0.184847
Dengue / QC	_MDYKGDATVFFILPNQGK_	P29622	0.510823	0.510823	1.70084e-12	1.0058e-11	146	P29622	SERPINA4	Kallistatin	KAIN_HUMAN	1	42.4863	1.42486	Dengue	QC	NaN	NaN	NaN	84.0355	0.0727057
Dengue / QC	_NYC[Carbamidomethyl (C)]GLPGEYWLGNDK_	P02675	2.35623	2.35623	1.83988e-12	1.08584e-11	90	P02675	FGB	Fibrinogen beta chain	FIBB_HUMAN	1	412.03	5.1203	Dengue	QC	NaN	NaN	NaN	69.8102	0.258581
Dengue / QC	_AVDQSVLLMKPEAELSVSSVYNLLTVK_	P20742	1.26649	1.26649	1.91041e-12	1.12296e-11	92	P20742	PZP	Pregnancy zone protein	PZP_HUMAN	1	140.575	2.40575	Dengue	QC	NaN	NaN	NaN	80.6366	0.209198
Dengue / QC	_EC[Carbamidomethyl (C)]EEIIRK_	P02675	6.60925	6.60925	1.94427e-12	1.14173e-11	28	P02675	FGB	Fibrinogen beta chain	FIBB_HUMAN	1	9662.96	97.6296	Dengue	QC	NaN	NaN	NaN	18.0757	0.309274
Dengue / QC	_NTDEDKWGDAC[Carbamidomethyl (C)]DNC[Carbamidomethyl (C)]R_	G3XAP6;P49747	1.99462	1.99462	1.95345e-12	1.14597e-11	54	G3XAP6;P49747	COMP	Cartilage oligomeric matrix protein	G3XAP6_HUMAN;COMP_HUMAN	1	298.511	3.98511	Dengue	QC	NaN	NaN	NaN	41.6268	0.260748
Dengue / QC	_TAMDVFVC[Carbamidomethyl (C)]TYFM[Oxidation (M)]PAAQLPELPDVELPTNKDVC[Carbamidomethyl (C)]DPGNTK_	P02774;P02774-3	1.27746	1.27746	2.02463e-12	1.18536e-11	114	P02774;P02774-3	GC	Vitamin D-binding protein;Isoform 3 of Vitamin D-binding protein	VTDB_HUMAN	1	142.412	2.42412	Dengue	QC	NaN	NaN	NaN	67.3345	0.192295
Dengue / QC	_EIEEVLTPEMLMR_	P29622	0.505748	0.505748	2.08181e-12	1.21642e-11	124	P29622	SERPINA4	Kallistatin	KAIN_HUMAN	1	41.9859	1.41986	Dengue	QC	NaN	NaN	NaN	88.0231	0.0775493
Dengue / QC	_TPFVTHPGYDTGNGIQLPGTSGQQPSVGQQMIFEEHGFR_	P02751;P02751-15;P02751-3;P02751-7	0.656659	0.656659	2.09025e-12	1.22014e-11	100	P02751;P02751-15;P02751-3;P02751-7	FN1	Fibronectin;Isoform 15 of Fibronectin;Isoform 3 of Fibronectin;Isoform 7 of Fibronectin	FINC_HUMAN	1	57.6427	1.57643	Dengue	QC	NaN	NaN	NaN	83.4464	0.104251
Dengue / QC	_TPENFPC[Carbamidomethyl (C)]KNLDENYC[Carbamidomethyl (C)]R_	P00747	2.32866	2.32866	2.15291e-12	1.2525e-11	46	P00747	PLG	Plasminogen	PLMN_HUMAN	1	402.337	5.02337	Dengue	QC	NaN	NaN	NaN	39.3562	0.209949
Dengue / QC	_TYLFKGSQYWR_	P04004	2.67404	2.67404	2.1542e-12	1.2525e-11	64	P04004	VTN	Vitronectin	VTNC_HUMAN	1	538.214	6.38214	Dengue	QC	NaN	NaN	NaN	52.0858	0.241976
Dengue / QC	_C[Carbamidomethyl (C)]EAC[Carbamidomethyl (C)]PPGYSGPTHQGVGLAFAK_	G3XAP6;P49747	1.27729	1.27729	2.16102e-12	1.25523e-11	40	G3XAP6;P49747	COMP	Cartilage oligomeric matrix protein	G3XAP6_HUMAN;COMP_HUMAN	1	142.383	2.42383	Dengue	QC	NaN	NaN	NaN	29.1149	0.202162
Dengue / QC	_VFDEFKPLVEE[Carboxy]PQNLIK[Carboxy]QNC[Carbamidomethyl (C)]ELFEQLGEYK_	P02768	1.02859	1.02859	2.50632e-12	1.44722e-11	36	P02768	ALB	Serum albumin	ALBU_HUMAN	1	104.002	2.04002	Dengue	QC	NaN	NaN	NaN	20.2543	0.341267
Dengue / QC	_NTEQEEGGEAVHEVEVVIK_	P00742	1.17413	1.17413	2.64901e-12	1.52387e-11	54	P00742	F10	Coagulation factor X	FA10_HUMAN	1	125.656	2.25656	Dengue	QC	NaN	NaN	NaN	44.557	0.117732
Dengue / QC	_LPSGLPVSLLTLYLDNNKISNIPDEYFK_	P51884	0.783715	0.783715	2.64941e-12	1.52387e-11	36	P51884	LUM	Lumican	LUM_HUMAN	1	72.1558	1.72156	Dengue	QC	NaN	NaN	NaN	31.2119	0.115672
Dengue / QC	_NHRSPVTLLAAVMSLPEEHNK_	P18428	1.47743	1.47743	2.70629e-12	1.55506e-11	56	P18428	LBP	Lipopolysaccharide-binding protein	LBP_HUMAN	1	178.453	2.78453	Dengue	QC	NaN	NaN	NaN	48.0016	0.146541
Dengue / QC	_QNC[Carbamidomethyl (C)]ELFEQLGEYKFQNALLVR_	P02768	0.954581	0.954581	2.71996e-12	1.56139e-11	176	P02768	ALB	Serum albumin	ALBU_HUMAN	1	93.8017	1.93802	Dengue	QC	NaN	NaN	NaN	151.574	0.124044
Dengue / QC	_TVMVNIENPEGIPVKQDSLSSQNQLGVLPLSWDIPELVNM[Oxidation (M)]GQWK_	P01024	0.729797	0.729797	2.7613e-12	1.58358e-11	144	P01024	C3	Complement C3	CO3_HUMAN	1	65.8406	1.65841	Dengue	QC	NaN	NaN	NaN	64.9541	0.097402
Dengue / QC	_GSWYSMRK_	P02675	2.64819	2.64819	2.86883e-12	1.63886e-11	48	P02675	FGB	Fibrinogen beta chain	FIBB_HUMAN	1	526.881	6.26881	Dengue	QC	NaN	NaN	NaN	39.4108	0.251818
Dengue / QC	_FTVDRPFLFLIYEHR_	P05546	1.0307	1.0307	2.93204e-12	1.67172e-11	144	P05546	SERPIND1	Heparin cofactor 2	HEP2_HUMAN	1	104.302	2.04302	Dengue	QC	NaN	NaN	NaN	98.4154	0.114908
Dengue / QC	_TMFIGGSQLSQK_	P80108	1.64543	1.64543	2.95582e-12	1.68364e-11	24	P80108	GPLD1	Phosphatidylinositol-glycan-specific phospholipase D	PHLD_HUMAN	1	212.841	3.12841	Dengue	QC	NaN	NaN	NaN	18.7026	0.116152
Dengue / QC	_SC[Carbamidomethyl (C)]ESNSPFPVHPGTAEC[Carbamidomethyl (C)]C[Carbamidomethyl (C)]TKEGLER_	P02774;P02774-3	2.87523	2.87523	2.97006e-12	1.68848e-11	126	P02774;P02774-3	GC	Vitamin D-binding protein;Isoform 3 of Vitamin D-binding protein	VTDB_HUMAN	1	633.721	7.33721	Dengue	QC	NaN	NaN	NaN	89.0471	0.309453
Dengue / QC	_KC[Carbamidomethyl (C)]YFPYLENGYNQNHGR_	Q5TFM2	1.27477	1.27477	3.04901e-12	1.72913e-11	62	Q5TFM2	CFH	Complement factor H	Q5TFM2_HUMAN	1	141.961	2.41961	Dengue	QC	NaN	NaN	NaN	30.0511	0.107875
Dengue / QC	_VPTVEPLDSLTLFLFR_	J3QQR8;J3QQX6;J3QRQ1;P13598	1.42512	1.42512	3.04716e-12	1.72913e-11	46	J3QQR8;J3QQX6;J3QRQ1;P13598	ICAM2	Intercellular adhesion molecule 2 (Fragment);Intercellular adhesion molecule 2 (Fragment);Intercellular adhesion molecule 2 (Fragment);Intercellular adhesion molecule 2	J3QQR8_HUMAN;J3QQX6_HUMAN;J3QRQ1_HUMAN;ICAM2_HUMAN	1	168.536	2.68536	Dengue	QC	NaN	NaN	NaN	16.1555	0.0890234
Dengue / QC	_TLAFPLTIR_	A0A0U1RQQ4;Q9UNN8	0.688151	0.688151	3.20782e-12	1.81489e-11	68	A0A0U1RQQ4;Q9UNN8	PROCR	Endothelial protein C receptor (Fragment);Endothelial protein C receptor	A0A0U1RQQ4_HUMAN;EPCR_HUMAN	1	61.1217	1.61122	Dengue	QC	NaN	NaN	NaN	45.6612	0.104301
Dengue / QC	_LGEDHKQC[Carbamidomethyl (C)]VPHDQC[Carbamidomethyl (C)]AC[Carbamidomethyl (C)]GVLTSEK_	P22891;P22891-2	1.93597	1.93597	3.52046e-12	1.97845e-11	38	P22891;P22891-2	PROZ	Vitamin K-dependent protein Z;Isoform 2 of Vitamin K-dependent protein Z	PROZ_HUMAN	1	282.636	3.82636	Dengue	QC	NaN	NaN	NaN	31.5301	0.173141
Dengue / QC	_HATKTAKDALSSVQESQVAQQAR_	B0YIW2;P02656	1.80052	1.80052	3.53068e-12	1.9823e-11	60	B0YIW2;P02656	APOC3	Apolipoprotein C-III	B0YIW2_HUMAN;APOC3_HUMAN	1	248.346	3.48346	Dengue	QC	NaN	NaN	NaN	52.5988	0.190398
Dengue / QC	_HADPDFTRKLWAYLTINQLLAER_	P19823	1.57914	1.57914	3.56514e-12	1.99974e-11	82	P19823	ITIH2	Inter-alpha-trypsin inhibitor heavy chain H2	ITIH2_HUMAN	1	198.792	2.98792	Dengue	QC	NaN	NaN	NaN	51.5709	0.257499
Dengue / QC	_DMALTAFVLISLQEAKDIC[Carbamidomethyl (C)]EEQVNSLPGSITK_	P01024	1.15671	1.15671	3.70524e-12	2.0724e-11	72	P01024	C3	Complement C3	CO3_HUMAN	1	122.948	2.22948	Dengue	QC	NaN	NaN	NaN	28.4885	0.158197
Dengue / QC	_ITEVWGIPSPIDTVFTR_	Q92954-3	1.17969	1.17969	3.80725e-12	2.1234e-11	82	Q92954-3	PRG4	Isoform C of Proteoglycan 4	PRG4_HUMAN	1	126.528	2.26528	Dengue	QC	NaN	NaN	NaN	65.2921	0.163296
Dengue / QC	_GLIDEVNQDFTNR_	P02671	2.08235	2.08235	3.8918e-12	2.1685e-11	56	P02671	FGA	Fibrinogen alpha chain	FIBA_HUMAN	1	323.496	4.23496	Dengue	QC	NaN	NaN	NaN	40.0409	0.204397
Dengue / QC	_VSVFVPPR_	P01871	-0.659298	0.659298	3.91989e-12	2.18208e-11	176	P01871	IGHM	Immunoglobulin heavy constant mu	IGHM_HUMAN	1	-36.6814	0.633186	Dengue	QC	NaN	NaN	NaN	96.1859	0.0839994
Dengue / QC	_TC[Carbamidomethyl (C)]QDINEC[Carbamidomethyl (C)]ETTNEC[Carbamidomethyl (C)]REDEMC[Carbamidomethyl (C)]WNYHGGFR_	Q12805;Q12805-2;Q12805-4	2.42675	2.42675	3.95247e-12	2.19814e-11	26	Q12805;Q12805-2;Q12805-4	EFEMP1	EGF-containing fibulin-like extracellular matrix protein 1;Isoform 2 of EGF-containing fibulin-like extracellular matrix protein 1;Isoform 4 of EGF-containing fibulin-like extracellular matrix protein 1	FBLN3_HUMAN	1	437.682	5.37682	Dengue	QC	NaN	NaN	NaN	18.2093	0.146016
Dengue / QC	_WTGRPTC[Carbamidomethyl (C)]RDTSC[Carbamidomethyl (C)]VNPPTVQNAYIVSR_	P08603	3.65067	3.65067	3.96506e-12	2.20306e-11	26	P08603	CFH	Complement factor H	CFAH_HUMAN	1	1155.92	12.5592	Dengue	QC	NaN	NaN	NaN	20.1667	0.236992
Dengue / QC	_ESSSHHPGIAEFPSRGK_	P02671	2.89435	2.89435	3.98457e-12	2.21027e-11	42	P02671	FGA	Fibrinogen alpha chain	FIBA_HUMAN	1	643.507	7.43507	Dengue	QC	NaN	NaN	NaN	36.8969	0.2508
Dengue / QC	_GIWLEAGK_	Q9Y490	2.32204	2.32204	4.06098e-12	2.24786e-11	22	Q9Y490	TLN1	Talin-1	TLN1_HUMAN	1	400.037	5.00037	Dengue	QC	NaN	NaN	NaN	16.9421	0.154051
Dengue / QC	_IIYKENERFQYK_	P08603	4.30204	4.30204	4.10155e-12	2.26819e-11	58	P08603	CFH	Complement factor H	CFAH_HUMAN	1	1872.61	19.7261	Dengue	QC	NaN	NaN	NaN	40.1782	0.323528
Dengue / QC	_LGPLVEQGRVR_	P02649	1.52547	1.52547	4.19854e-12	2.31634e-11	50	P02649	APOE	Apolipoprotein E	APOE_HUMAN	1	187.881	2.87881	Dengue	QC	NaN	NaN	NaN	45.463	0.174414
Dengue / QC	_DLLYIGK_	B4E1Z4	0.766451	0.766451	4.23715e-12	2.33222e-11	60	B4E1Z4	NaN	cDNA FLJ55673, highly similar to Complement factor B (EC 3.4.21.47)	B4E1Z4_HUMAN	1	70.1081	1.70108	Dengue	QC	NaN	NaN	NaN	43.0491	0.102557
Dengue / QC	_C[Carbamidomethyl (C)]LPVTAPENGKIVSSAMEPDREYHFGQAVR_	P08603	2.95577	2.95577	4.34514e-12	2.38942e-11	62	P08603	CFH	Complement factor H	CFAH_HUMAN	1	675.847	7.75847	Dengue	QC	NaN	NaN	NaN	38.8161	0.299302
Dengue / QC	_LELELRPTGEIEQYSVSATYELQREDR_	P04114	0.683869	0.683869	4.59355e-12	2.51896e-11	162	P04114	APOB	Apolipoprotein B-100	APOB_HUMAN	1	60.6442	1.60644	Dengue	QC	NaN	NaN	NaN	107.454	0.0840521
Dengue / QC	_GDDITMVLILPKPEK_	P01008	0.836484	0.836484	4.76581e-12	2.60372e-11	82	P01008	SERPINC1	Antithrombin-III	ANT3_HUMAN	1	78.5693	1.78569	Dengue	QC	NaN	NaN	NaN	73.5969	0.123109
Dengue / QC	_FYYLIASETPGK_	P29622	0.288472	0.288472	4.78097e-12	2.60958e-11	72	P29622	SERPINA4	Kallistatin	KAIN_HUMAN	1	22.1346	1.22135	Dengue	QC	NaN	NaN	NaN	52.2216	0.0782895
Dengue / QC	_TILDDLRAEDHFSVIDFNQNIR_	P19823	0.726652	0.726652	5.02708e-12	2.73883e-11	124	P19823	ITIH2	Inter-alpha-trypsin inhibitor heavy chain H2	ITIH2_HUMAN	1	65.4795	1.65479	Dengue	QC	NaN	NaN	NaN	94.3048	0.0951499
Dengue / QC	_GFQHLLHTLNLPGHGLETR_	P29622	0.777085	0.777085	5.23706e-12	2.8427e-11	128	P29622	SERPINA4	Kallistatin	KAIN_HUMAN	1	71.3665	1.71366	Dengue	QC	NaN	NaN	NaN	115.653	0.10306
Dengue / QC	_SKMLTPEHVFIHPGWK_	P09871	2.58329	2.58329	5.50039e-12	2.97466e-11	28	P09871	C1S	Complement C1s subcomponent	C1S_HUMAN	1	499.303	5.99303	Dengue	QC	NaN	NaN	NaN	20.7373	0.162742
Dengue / QC	_C[Carbamidomethyl (C)]VDVDEC[Carbamidomethyl (C)]APPAEPC[Carbamidomethyl (C)]GK_	P23142	0.751395	0.751395	5.7457e-12	3.09878e-11	146	P23142	FBLN1	Fibulin-1	FBLN1_HUMAN	1	68.342	1.68342	Dengue	QC	NaN	NaN	NaN	130.327	0.0931043
Dengue / QC	_DRQHLPLIK_	P02671	2.15066	2.15066	5.95165e-12	3.20398e-11	36	P02671	FGA	Fibrinogen alpha chain	FIBA_HUMAN	1	344.03	4.4403	Dengue	QC	NaN	NaN	NaN	30.9579	0.173016
Dengue / QC	_SYLSMVGSC[Carbamidomethyl (C)]C[Carbamidomethyl (C)]TSASPTVC[Carbamidomethyl (C)]FLK_	P02774;P02774-3	0.44236	0.44236	5.9833e-12	3.21808e-11	118	P02774;P02774-3	GC	Vitamin D-binding protein;Isoform 3 of Vitamin D-binding protein	VTDB_HUMAN	1	35.8826	1.35883	Dengue	QC	NaN	NaN	NaN	101.515	0.0792334
Dengue / QC	_NPDPVAAPYC[Carbamidomethyl (C)]YTRDPSVR_	P08519	2.52871	2.52871	5.99841e-12	3.22326e-11	36	P08519	LPA	Apolipoprotein(a)	APOA_HUMAN	1	477.056	5.77056	Dengue	QC	NaN	NaN	NaN	30.6085	0.243821
Dengue / QC	_GGSTSYGTGSETESPRNPSSAGSWNSGSSGPGSTGNR_	P02671	2.5108	2.5108	6.0458e-12	3.23984e-11	80	P02671	FGA	Fibrinogen alpha chain	FIBA_HUMAN	1	469.935	5.69935	Dengue	QC	NaN	NaN	NaN	67.9116	0.262884
Dengue / QC	_NTVLVLNTQSLVFVQTDKPMYKPGQTVR_	P20742	2.97915	2.97915	6.04472e-12	3.23984e-11	50	P20742	PZP	Pregnancy zone protein	PZP_HUMAN	1	688.523	7.88523	Dengue	QC	NaN	NaN	NaN	36.9568	0.289245
Dengue / QC	_GSESGIFTNTKESSSHHPGIAEFPSR_	P02671	2.61374	2.61374	6.28631e-12	3.36112e-11	82	P02671	FGA	Fibrinogen alpha chain	FIBA_HUMAN	1	512.089	6.12089	Dengue	QC	NaN	NaN	NaN	60.7315	0.290224
Dengue / QC	_DFGTHYITEAVLGGIYEYTLVMNK_	P07358	1.23289	1.23289	6.28924e-12	3.36112e-11	52	P07358	C8B	Complement component C8 beta chain	CO8B_HUMAN	1	135.037	2.35037	Dengue	QC	NaN	NaN	NaN	47.4376	0.134597
Dengue / QC	_ENPAVIDFELAPIVDLVR_	P13671	0.659905	0.659905	6.64039e-12	3.53273e-11	138	P13671	C6	Complement component C6	CO6_HUMAN	1	57.9978	1.57998	Dengue	QC	NaN	NaN	NaN	133.491	0.0902947
Dengue / QC	_DC[Carbamidomethyl (C)]NTC[Carbamidomethyl (C)]IC[Carbamidomethyl (C)]R_	P04275	1.37803	1.37803	6.69741e-12	3.55985e-11	48	P04275	VWF	von Willebrand factor	VWF_HUMAN	1	159.913	2.59913	Dengue	QC	NaN	NaN	NaN	43.0892	0.177157
Dengue / QC	_EC[Carbamidomethyl (C)]ELPKIDVHLVPDRK_	P08603	1.7758	1.7758	6.87066e-12	3.63879e-11	28	P08603	CFH	Complement factor H	CFAH_HUMAN	1	242.428	3.42428	Dengue	QC	NaN	NaN	NaN	21.6311	0.154874
Dengue / QC	_VADALTNAVAHVDDMPNALSALSDLHAHKLR_	P69905	1.46093	1.46093	7.24739e-12	3.8177e-11	82	P69905	HBA1	Hemoglobin subunit alpha	HBA_HUMAN	1	175.286	2.75286	Dengue	QC	NaN	NaN	NaN	57.0003	0.121359
Dengue / QC	_ILSVKGLLVGEILSAVLSQEGINILTHLPK_	P01031	1.578	1.578	7.52983e-12	3.95996e-11	64	P01031	C5	Complement C5	CO5_HUMAN	1	198.555	2.98555	Dengue	QC	NaN	NaN	NaN	57.254	0.163042
Dengue / QC	_LYSVSYLLK_	P21333;P21333-2;Q5HY54	0.621817	0.621817	7.55761e-12	3.97045e-11	66	P21333;P21333-2;Q5HY54	FLNA	Filamin-A;Isoform 2 of Filamin-A;Filamin-A	FLNA_HUMAN;FLNA_HUMAN;Q5HY54_HUMAN	1	53.8812	1.53881	Dengue	QC	NaN	NaN	NaN	54.8626	0.108077
Dengue / QC	_NIPTVNENLENYYLEVNQLEKFDIK_	P51884	0.969283	0.969283	7.62157e-12	4.00048e-11	78	P51884	LUM	Lumican	LUM_HUMAN	1	95.7867	1.95787	Dengue	QC	NaN	NaN	NaN	59.7509	0.113781
Dengue / QC	_RYTIAALLSPYSYSTTAVVTNPK_	P02766	0.530061	0.530061	7.63289e-12	4.00284e-11	160	P02766	TTR	Transthyretin	TTHY_HUMAN	1	44.399	1.44399	Dengue	QC	NaN	NaN	NaN	121.376	0.0800824
Dengue / QC	_EAVM[Oxidation (M)]DINKPGPLFKPENGLLETK_	P07225	0.493109	0.493109	8.04782e-12	4.19799e-11	14	P07225	PROS1	Vitamin K-dependent protein S	PROS_HUMAN	1	40.7474	1.40747	Dengue	QC	NaN	NaN	NaN	8.93143	0.101351
Dengue / QC	_QDGSVDFGR_	P02675	3.00665	3.00665	8.13237e-12	4.23834e-11	134	P02675	FGB	Fibrinogen beta chain	FIBB_HUMAN	1	703.698	8.03698	Dengue	QC	NaN	NaN	NaN	109.001	0.3547
Dengue / QC	_TNPC[Carbamidomethyl (C)]LHGGR_	P00748	1.88327	1.88327	8.29098e-12	4.30955e-11	100	P00748	F12	Coagulation factor XII	FA12_HUMAN	1	268.911	3.68911	Dengue	QC	NaN	NaN	NaN	92.3403	0.228493
Dengue / QC	_C[Carbamidomethyl (C)]C[Carbamidomethyl (C)]HC[Carbamidomethyl (C)]C[Carbamidomethyl (C)]LLGR_	P23142	1.84509	1.84509	8.77107e-12	4.54705e-11	80	P23142	FBLN1	Fibulin-1	FBLN1_HUMAN	1	259.275	3.59275	Dengue	QC	NaN	NaN	NaN	70.6154	0.254881
Dengue / QC	_AC[Carbamidomethyl (C)]EPGVDYVYKTR_	P01024	3.0117	3.0117	8.9729e-12	4.64758e-11	32	P01024	C3	Complement C3	CO3_HUMAN	1	706.517	8.06517	Dengue	QC	NaN	NaN	NaN	20.1868	0.173222
Dengue / QC	_E[Acetyl (Protein N-term)]EEIAALVIDNGSGMC[Carbamidomethyl (C)]K_	P63261	1.66079	1.66079	9.25445e-12	4.7892e-11	74	P63261	ACTG1	Actin, cytoplasmic 2	ACTG_HUMAN	1	216.189	3.16189	Dengue	QC	NaN	NaN	NaN	56.6483	0.222064
Dengue / QC	_IKKWLTFSLGK_	P11226	1.22158	1.22158	9.541e-12	4.9245e-11	54	P11226	MBL2	Mannose-binding protein C	MBL2_HUMAN	1	133.202	2.33202	Dengue	QC	NaN	NaN	NaN	49.7215	0.14712
Dengue / QC	_TVM[Oxidation (M)]VNIENPEGIPVKQDSLSSQNQLGVLPLSWDIPELVNM[Oxidation (M)]GQWK_	P01024	1.31472	1.31472	9.61812e-12	4.95995e-11	68	P01024	C3	Complement C3	CO3_HUMAN	1	148.754	2.48754	Dengue	QC	NaN	NaN	NaN	52.1201	0.14699
Dengue / QC	_SDGSENFNR_	Q08830	1.83442	1.83442	9.66864e-12	4.98163e-11	28	Q08830	FGL1	Fibrinogen-like protein 1	FGL1_HUMAN	1	256.628	3.56628	Dengue	QC	NaN	NaN	NaN	22.7803	0.148936
Dengue / QC	_C[Carbamidomethyl (C)]VGWNGQC[Carbamidomethyl (C)]SGK_	P27918	0.8722	0.8722	9.72703e-12	5.00734e-11	108	P27918	CFP	Properdin	PROP_HUMAN	1	83.0452	1.83045	Dengue	QC	NaN	NaN	NaN	84.3286	0.169812
Dengue / QC	_GVYSSDVFDIFPGTYQTLEMFPR_	P00450	0.555518	0.555518	9.84074e-12	5.06144e-11	176	P00450	CP	Ceruloplasmin	CERU_HUMAN	1	46.9696	1.4697	Dengue	QC	NaN	NaN	NaN	79.3781	0.0776674
Dengue / QC	_VELEDWNGR_	P02679;P02679-2	2.66684	2.66684	1.008e-11	5.17546e-11	128	P02679;P02679-2	FGG	Fibrinogen gamma chain;Isoform Gamma-A of Fibrinogen gamma chain	FIBG_HUMAN	1	535.036	6.35036	Dengue	QC	NaN	NaN	NaN	95.6922	0.310798
Dengue / QC	_AFWLDVSHNR_	P35858;P35858-2	0.817783	0.817783	1.02791e-11	5.25931e-11	52	P35858;P35858-2	IGFALS	Insulin-like growth factor-binding protein complex acid labile subunit;Isoform 2 of Insulin-like growth factor-binding protein complex acid labile subunit	ALS_HUMAN	1	76.2695	1.7627	Dengue	QC	NaN	NaN	NaN	29.5945	0.0987551
Dengue / QC	_WSPELPVC[Carbamidomethyl (C)]APIIC[Carbamidomethyl (C)]PPPSIPTFATLR_	P02749	0.758428	0.758428	1.02752e-11	5.25931e-11	170	P02749	APOH	Beta-2-glycoprotein 1	APOH_HUMAN	1	69.1646	1.69165	Dengue	QC	NaN	NaN	NaN	97.8816	0.0863492
Dengue / QC	_DFALQNPSAVPR_	P35858;P35858-2	0.468054	0.468054	1.04594e-11	5.34185e-11	128	P35858;P35858-2	IGFALS	Insulin-like growth factor-binding protein complex acid labile subunit;Isoform 2 of Insulin-like growth factor-binding protein complex acid labile subunit	ALS_HUMAN	1	38.3242	1.38324	Dengue	QC	NaN	NaN	NaN	120.591	0.0688853
Dengue / QC	_LLATLC[Carbamidomethyl (C)]SAEVC[Carbamidomethyl (C)]QC[Carbamidomethyl (C)]AEGKC[Carbamidomethyl (C)]PR_	P0C0L5	3.05272	3.05272	1.04676e-11	5.34185e-11	96	P0C0L5	C4B	Complement C4-B	CO4B_HUMAN	1	729.778	8.29778	Dengue	QC	NaN	NaN	NaN	67.7991	0.34708
Dengue / QC	_WYQMGIVSWGEGC[Carbamidomethyl (C)]DRDGK_	P00734	0.807352	0.807352	1.07867e-11	5.49039e-11	38	P00734	F2	Prothrombin	THRB_HUMAN	1	74.9996	1.75	Dengue	QC	NaN	NaN	NaN	33.426	0.0882681
Dengue / QC	_SGKFTC[Carbamidomethyl (C)]KVPGLYYFTYHASSR_	D6R934;P02746	2.05519	2.05519	1.10069e-11	5.58315e-11	78	D6R934;P02746	C1QB	Complement C1q subcomponent subunit B	D6R934_HUMAN;C1QB_HUMAN	1	315.597	4.15597	Dengue	QC	NaN	NaN	NaN	54.6402	0.230113
Dengue / QC	_HGTDDGVVWMNWK_	P02675	3.28217	3.28217	1.17671e-11	5.9585e-11	120	P02675	FGB	Fibrinogen beta chain	FIBB_HUMAN	1	872.816	9.72816	Dengue	QC	NaN	NaN	NaN	87.4068	0.394149
Dengue / QC	_LTIFKTELR_	P04114	1.07979	1.07979	1.19706e-11	6.04075e-11	144	P04114	APOB	Apolipoprotein B-100	APOB_HUMAN	1	111.372	2.11372	Dengue	QC	NaN	NaN	NaN	130.382	0.147407
Dengue / QC	_FQVDNNNRLLLQQVSLPELPGEYSM[Oxidation (M)]K_	P01023	0.382872	0.382872	1.19626e-11	6.04075e-11	64	P01023	A2M	Alpha-2-macroglobulin	A2MG_HUMAN	1	30.3935	1.30393	Dengue	QC	NaN	NaN	NaN	27.0269	0.539599
Dengue / QC	_TVMVNIENPEGIPVKQDSLSSQNQLGVLPLSWDIPELVNMGQWK_	P01024	0.835828	0.835828	1.21495e-11	6.10736e-11	170	P01024	C3	Complement C3	CO3_HUMAN	1	78.4881	1.78488	Dengue	QC	NaN	NaN	NaN	80.5446	0.110475
Dengue / QC	_VGDRNTEQEEGGEAVHEVEVVIK_	P00742	0.703771	0.703771	1.2143e-11	6.10736e-11	62	P00742	F10	Coagulation factor X	FA10_HUMAN	1	62.8756	1.62876	Dengue	QC	NaN	NaN	NaN	47.8831	0.0891148
Dengue / QC	_TLLVFEVQQPFLFVLWDQQHKFPVFMGR_	P05155;P05155-3	3.00974	3.00974	1.2209e-11	6.12428e-11	30	P05155;P05155-3	SERPING1	Plasma protease C1 inhibitor;Isoform 3 of Plasma protease C1 inhibitor	IC1_HUMAN	1	705.42	8.0542	Dengue	QC	NaN	NaN	NaN	20.1495	0.191337
Dengue / QC	_YLQEIYNSNNQK_	P02679;P02679-2	1.77688	1.77688	1.22693e-11	6.14928e-11	110	P02679;P02679-2	FGG	Fibrinogen gamma chain;Isoform Gamma-A of Fibrinogen gamma chain	FIBG_HUMAN	1	242.685	3.42685	Dengue	QC	NaN	NaN	NaN	88.5118	0.209662
Dengue / QC	_NKC[Carbamidomethyl (C)]YTAVVPLVYGGETK_	P01591	2.65371	2.65371	1.29037e-11	6.45078e-11	70	P01591	JCHAIN	Immunoglobulin J chain	IGJ_HUMAN	1	529.283	6.29283	Dengue	QC	NaN	NaN	NaN	44.9417	0.26784
Dengue / QC	_GATLALTQVTPQDER_	P43121	1.19738	1.19738	1.31216e-11	6.55414e-11	66	P43121	MCAM	Cell surface glycoprotein MUC18	MUC18_HUMAN	1	129.323	2.29323	Dengue	QC	NaN	NaN	NaN	54.6684	0.128281
Dengue / QC	_QSSGENC[Carbamidomethyl (C)]DVVVNTLGK_	P01833	1.61686	1.61686	1.36005e-11	6.77033e-11	96	P01833	PIGR	Polymeric immunoglobulin receptor	PIGR_HUMAN	1	206.707	3.06707	Dengue	QC	NaN	NaN	NaN	74.578	0.209863
Dengue / QC	_MSSINADFAFNLYR_	P05543	1.37293	1.37293	1.36545e-11	6.79149e-11	50	P05543	SERPINA7	Thyroxine-binding globulin	THBG_HUMAN	1	158.997	2.58997	Dengue	QC	NaN	NaN	NaN	31.74	0.143223
Dengue / QC	_LKHLIVTPSGC[Carbamidomethyl (C)]GEQNMIGMTPTVIAVHYLDETEQWEK_	P01024	0.70726	0.70726	1.39988e-11	6.95686e-11	118	P01024	C3	Complement C3	CO3_HUMAN	1	63.2701	1.6327	Dengue	QC	NaN	NaN	NaN	68.3098	0.0709773
Dengue / QC	_ALVDTLKFVTQAEGAK_	P04114	1.62597	1.62597	1.46955e-11	7.27846e-11	92	P04114	APOB	Apolipoprotein B-100	APOB_HUMAN	1	208.649	3.08649	Dengue	QC	NaN	NaN	NaN	72.3768	0.181013
Dengue / QC	_DNAKNSLYLQM[Oxidation (M)]NSLRAEDTAVYYC[Carbamidomethyl (C)]AR_	P01762	1.52834	1.52834	1.48201e-11	7.32527e-11	126	P01762	IGHV3-11	Immunoglobulin heavy variable 3-11	HV311_HUMAN	1	188.454	2.88454	Dengue	QC	NaN	NaN	NaN	60.1753	0.637349
Dengue / QC	_HSITNPLAVLC[Carbamidomethyl (C)]EFISQSIK_	P04114	1.22495	1.22495	1.55804e-11	7.67153e-11	80	P04114	APOB	Apolipoprotein B-100	APOB_HUMAN	1	133.748	2.33748	Dengue	QC	NaN	NaN	NaN	74.5716	0.144964
Dengue / QC	_ENFVLTTAK_	P22891;P22891-2	0.667205	0.667205	1.56907e-11	7.71941e-11	66	P22891;P22891-2	PROZ	Vitamin K-dependent protein Z;Isoform 2 of Vitamin K-dependent protein Z	PROZ_HUMAN	1	58.7993	1.58799	Dengue	QC	NaN	NaN	NaN	59.5126	0.0927933
Dengue / QC	_NIPGDFEC[Carbamidomethyl (C)]EC[Carbamidomethyl (C)]PEGYRYNLK_	P07225	1.601	1.601	1.77857e-11	8.69916e-11	80	P07225	PROS1	Vitamin K-dependent protein S	PROS_HUMAN	1	203.353	3.03353	Dengue	QC	NaN	NaN	NaN	70.3028	0.191263
Dengue / QC	_AKLPDATPK_	P02774;P02774-3	1.4415	1.4415	1.93876e-11	9.43564e-11	60	P02774;P02774-3	GC	Vitamin D-binding protein;Isoform 3 of Vitamin D-binding protein	VTDB_HUMAN	1	171.602	2.71602	Dengue	QC	NaN	NaN	NaN	35.2854	0.161819
Dengue / QC	_MKFAC[Carbamidomethyl (C)]YYPR_	P0C0L5	1.77762	1.77762	1.93594e-11	9.43564e-11	74	P0C0L5	C4B	Complement C4-B	CO4B_HUMAN	1	242.86	3.4286	Dengue	QC	NaN	NaN	NaN	61.2505	0.211342
Dengue / QC	_SLAPYAQDTQEKLNHQLEGLTFQMK_	P06727	0.807341	0.807341	1.99426e-11	9.69769e-11	122	P06727	APOA4	Apolipoprotein A-IV	APOA4_HUMAN	1	74.9983	1.74998	Dengue	QC	NaN	NaN	NaN	110.408	0.107775
Dengue / QC	_RNFGYTLR_	P05546	1.03154	1.03154	2.06438e-11	1.00221e-10	92	P05546	SERPIND1	Heparin cofactor 2	HEP2_HUMAN	1	104.42	2.0442	Dengue	QC	NaN	NaN	NaN	45.0806	0.0998012
Dengue / QC	_QGDVEC[Carbamidomethyl (C)]QR_	P13671	0.921867	0.921867	2.07962e-11	1.00795e-10	110	P13671	C6	Complement component C6	CO6_HUMAN	1	89.4566	1.89457	Dengue	QC	NaN	NaN	NaN	28.1343	0.12868
Dengue / QC	_GLEWLGR_	A0A0B4J1U7	-1.1653	1.1653	2.15335e-11	1.04282e-10	176	A0A0B4J1U7	IGHV6-1	Immunoglobulin heavy variable 6-1	HV601_HUMAN	1	-55.4128	0.445872	Dengue	QC	NaN	NaN	NaN	51.2984	0.136351
Dengue / QC	_EDLIWELLNQAQEHFGK_	P02787	1.08121	1.08121	2.17615e-11	1.053e-10	144	P02787	TF	Serotransferrin	TRFE_HUMAN	1	111.581	2.11581	Dengue	QC	NaN	NaN	NaN	129.036	0.125272
Dengue / QC	_IRPFFPQQ_	P02675	2.97521	2.97521	2.19813e-11	1.06276e-10	154	P02675	FGB	Fibrinogen beta chain	FIBB_HUMAN	1	686.37	7.8637	Dengue	QC	NaN	NaN	NaN	123.126	0.371839
Dengue / QC	_GEC[Carbamidomethyl (C)]QAEGVLFFQGDR_	P02790	0.783749	0.783749	2.20739e-11	1.06636e-10	98	P02790	HPX	Hemopexin	HEMO_HUMAN	1	72.1599	1.7216	Dengue	QC	NaN	NaN	NaN	76.4521	0.0951043
Dengue / QC	_GFPSVLR_	P01871	-0.671468	0.671468	2.22967e-11	1.07624e-10	176	P01871	IGHM	Immunoglobulin heavy constant mu	IGHM_HUMAN	1	-37.2133	0.627867	Dengue	QC	NaN	NaN	NaN	84.9773	0.083819
Dengue / QC	_EGGQTAPASTR_	P06396	0.956902	0.956902	2.23326e-11	1.07709e-10	106	P06396	GSN	Gelsolin	GELS_HUMAN	1	94.1138	1.94114	Dengue	QC	NaN	NaN	NaN	100.079	0.12963
Dengue / QC	_ESGMTMEELK_	P20851;P20851-2	1.01845	1.01845	2.27666e-11	1.09623e-10	36	P20851;P20851-2	C4BPB	C4b-binding protein beta chain;Isoform 2 of C4b-binding protein beta chain	C4BPB_HUMAN	1	102.575	2.02575	Dengue	QC	NaN	NaN	NaN	27.6038	0.101412
Dengue / QC	_LSPIYNLVPVK_	P02748	-0.663406	0.663406	2.33559e-11	1.12185e-10	156	P02748	C9	Complement component C9	CO9_HUMAN	1	-36.8614	0.631386	Dengue	QC	NaN	NaN	NaN	86.5105	0.0834138
Dengue / QC	_FDEFFSEGC[Carbamidomethyl (C)]APGSKKDSSLC[Carbamidomethyl (C)]K_	P02787	2.31517	2.31517	2.34065e-11	1.12336e-10	40	P02787	TF	Serotransferrin	TRFE_HUMAN	1	397.665	4.97665	Dengue	QC	NaN	NaN	NaN	34.2321	0.206607
Dengue / QC	_GDIGETGVPGAEGPR_	Q15848	0.467136	0.467136	2.40145e-11	1.14973e-10	116	Q15848	ADIPOQ	Adiponectin	ADIPO_HUMAN	1	38.2363	1.38236	Dengue	QC	NaN	NaN	NaN	78.7313	0.0888021
Dengue / QC	_SQPM[Oxidation (M)]GLWR_	P25311	1.1564	1.1564	2.53242e-11	1.20752e-10	68	P25311	AZGP1	Zinc-alpha-2-glycoprotein	ZA2G_HUMAN	1	122.901	2.22901	Dengue	QC	NaN	NaN	NaN	62.2609	0.159061
Dengue / QC	_WHWSSGSLVSYK_	P05451	0.388094	0.388094	2.67062e-11	1.27032e-10	40	P05451	REG1A	Lithostathine-1-alpha	REG1A_HUMAN	1	30.8664	1.30866	Dengue	QC	NaN	NaN	NaN	18.0605	0.324348
Dengue / QC	_NQVVIAAGR_	P80108	0.646392	0.646392	2.79056e-11	1.32417e-10	152	P80108	GPLD1	Phosphatidylinositol-glycan-specific phospholipase D	PHLD_HUMAN	1	56.5249	1.56525	Dengue	QC	NaN	NaN	NaN	88.6231	0.0689687
Dengue / QC	_EYC[Carbamidomethyl (C)]GVPGDGDEELLRFSN_	P02760	2.53241	2.53241	2.81408e-11	1.33425e-10	40	P02760	AMBP	Protein AMBP	AMBP_HUMAN	1	478.536	5.78536	Dengue	QC	NaN	NaN	NaN	30.9658	0.230472
Dengue / QC	_SYSC[Carbamidomethyl (C)]QVM[Oxidation (M)]HEGSTVEK_	P15814	1.16974	1.16974	2.90142e-11	1.37014e-10	140	P15814	IGLL1	Immunoglobulin lambda-like polypeptide 1	IGLL1_HUMAN	1	124.97	2.2497	Dengue	QC	NaN	NaN	NaN	74.2734	0.537791
Dengue / QC	_TPC[Carbamidomethyl (C)]TVSC[Carbamidomethyl (C)]NIPVVSGK_	P02675	2.47469	2.47469	3.00666e-11	1.41197e-10	136	P02675	FGB	Fibrinogen beta chain	FIBB_HUMAN	1	455.847	5.55847	Dengue	QC	NaN	NaN	NaN	113.863	0.316563
Dengue / QC	_C[Carbamidomethyl (C)]FSSDFMAYDIAC[Carbamidomethyl (C)]DR_	O75882;O75882-2	0.735326	0.735326	3.01733e-11	1.41579e-10	52	O75882;O75882-2	ATRN	Attractin;Isoform 2 of Attractin	ATRN_HUMAN	1	66.4774	1.66477	Dengue	QC	NaN	NaN	NaN	32.635	0.105873
Dengue / QC	_ITEVALMGHLSC[Carbamidomethyl (C)]DTKEER_	P04114	0.429942	0.429942	3.02092e-11	1.41634e-10	122	P04114	APOB	Apolipoprotein B-100	APOB_HUMAN	1	34.7179	1.34718	Dengue	QC	NaN	NaN	NaN	81.6458	0.061936
Dengue / QC	_GC[Carbamidomethyl (C)]PAALPLSNLYETLGVVGSTTTQLYTDR_	Q15582	0.925678	0.925678	3.09544e-11	1.44897e-10	54	Q15582	TGFBI	Transforming growth factor-beta-induced protein ig-h3	BGH3_HUMAN	1	89.9576	1.89958	Dengue	QC	NaN	NaN	NaN	40.2268	0.12723
Dengue / QC	_MKGLIDEVNQDFTNRINK_	P02671	2.32931	2.32931	3.15392e-11	1.47517e-10	32	P02671	FGA	Fibrinogen alpha chain	FIBA_HUMAN	1	402.565	5.02565	Dengue	QC	NaN	NaN	NaN	25.5801	0.196934
Dengue / QC	_AQLVDMK_	P02671	2.72431	2.72431	3.3188e-11	1.54737e-10	142	P02671	FGA	Fibrinogen alpha chain	FIBA_HUMAN	1	560.845	6.60845	Dengue	QC	NaN	NaN	NaN	120.311	0.342115
Dengue / QC	_SETAEELKK_	O14791;O14791-2	0.804936	0.804936	3.55034e-11	1.6527e-10	148	O14791;O14791-2	APOL1	Apolipoprotein L1;Isoform 2 of Apolipoprotein L1	APOL1_HUMAN	1	74.7068	1.74707	Dengue	QC	NaN	NaN	NaN	95.6726	0.111293
Dengue / QC	_C[Carbamidomethyl (C)]QHEMDQYWGIGSLASGINLFTNSFEGPVLDHR_	P07358	1.00372	1.00372	3.67007e-11	1.70305e-10	100	P07358	C8B	Complement component C8 beta chain	CO8B_HUMAN	1	100.516	2.00516	Dengue	QC	NaN	NaN	NaN	35.7909	0.115069
Dengue / QC	_EGIVEYPRC[Carbamidomethyl (C)]E_	Q92496;Q92496-2	0.995993	0.995993	3.78193e-11	1.75358e-10	110	Q92496;Q92496-2	CFHR4	Complement factor H-related protein 4;Isoform 2 of Complement factor H-related protein 4	FHR4_HUMAN	1	99.4453	1.99445	Dengue	QC	NaN	NaN	NaN	99.3683	0.135963
Dengue / QC	_ELSHLPSLYDYSAYR_	P10643	0.788695	0.788695	3.84e-11	1.7777e-10	36	P10643	C7	Complement component C7	CO7_HUMAN	1	72.7511	1.72751	Dengue	QC	NaN	NaN	NaN	31.2565	0.136399
Dengue / QC	_LIVHNGYC[Carbamidomethyl (C)]DGRSER_	P02753;Q5VY30	2.92654	2.92654	3.89564e-11	1.79921e-10	70	P02753;Q5VY30	RBP4	Retinol-binding protein 4;Retinol binding protein 4, plasma, isoform CRA_b	RET4_HUMAN;Q5VY30_HUMAN	1	660.285	7.60285	Dengue	QC	NaN	NaN	NaN	50.8589	0.328512
Dengue / QC	_QDSLSSQNQLGVLPLSWDIPELVNMGQWK_	P01024	1.44879	1.44879	3.92849e-11	1.81154e-10	154	P01024	C3	Complement C3	CO3_HUMAN	1	172.979	2.72979	Dengue	QC	NaN	NaN	NaN	81.8232	0.162403
Dengue / QC	_GLEWIGEIYHSGSTNYNPSLK_	A0A075B6R2	1.17187	1.17187	3.99176e-11	1.83865e-10	44	A0A075B6R2	IGHV4-4	Immunoglobulin heavy variable 4-4	HV404_HUMAN	1	125.303	2.25303	Dengue	QC	NaN	NaN	NaN	37.927	0.181819
Dengue / QC	_VPGTSTSATLTGLTR_	P02751;P02751-15;P02751-3;P02751-7	0.42453	0.42453	4.04614e-11	1.85996e-10	118	P02751;P02751-15;P02751-3;P02751-7	FN1	Fibronectin;Isoform 15 of Fibronectin;Isoform 3 of Fibronectin;Isoform 7 of Fibronectin	FINC_HUMAN	1	34.2135	1.34214	Dengue	QC	NaN	NaN	NaN	86.1513	0.152151
Dengue / QC	_AAFGQGSGPIM[Oxidation (M)]LDEVQC[Carbamidomethyl (C)]TGTEASLADC[Carbamidomethyl (C)]K_	Q08380	0.543361	0.543361	4.07512e-11	1.87036e-10	40	Q08380	LGALS3BP	Galectin-3-binding protein	LG3BP_HUMAN	1	45.7364	1.45736	Dengue	QC	NaN	NaN	NaN	18.6176	0.324154
Dengue / QC	_PGMPFDLMVFVTNPDGSPAYR_	P01024	0.923535	0.923535	4.2167e-11	1.93233e-10	60	P01024	C3	Complement C3	CO3_HUMAN	1	89.6758	1.89676	Dengue	QC	NaN	NaN	NaN	51.1472	0.13063
Dengue / QC	_PLLVDVDLQYPQDAVLALTQNHHK_	P19827	0.840859	0.840859	4.37413e-11	1.99824e-10	108	P19827	ITIH1	Inter-alpha-trypsin inhibitor heavy chain H1	ITIH1_HUMAN	1	79.1116	1.79112	Dengue	QC	NaN	NaN	NaN	93.997	0.132207
Dengue / QC	_WLTFSLGK_	P11226	2.29107	2.29107	4.43327e-11	2.02212e-10	28	P11226	MBL2	Mannose-binding protein C	MBL2_HUMAN	1	389.418	4.89418	Dengue	QC	NaN	NaN	NaN	15.6986	0.172771
Dengue / QC	_VGYVSGWGQSDNFKLTDHLK_	P00739	1.07957	1.07957	4.71794e-11	2.14532e-10	146	P00739	HPR	Haptoglobin-related protein	HPTR_HUMAN	1	111.34	2.1134	Dengue	QC	NaN	NaN	NaN	113.139	0.137797
Dengue / QC	_SVPPSASHVAPTETFTYEWTVPKEVGPTNADPVC[Carbamidomethyl (C)]LAK_	P00450	2.81531	2.81531	4.80938e-11	2.18352e-10	76	P00450	CP	Ceruloplasmin	CERU_HUMAN	1	603.87	7.0387	Dengue	QC	NaN	NaN	NaN	50.7332	0.325754
Dengue / QC	_YTTEIIKC[Carbamidomethyl (C)]PQPK_	B4DPQ0	2.01195	2.01195	5.04796e-11	2.28654e-10	116	B4DPQ0	C1R	Complement C1r subcomponent	B4DPQ0_HUMAN	1	303.328	4.03328	Dengue	QC	NaN	NaN	NaN	92.7356	0.218471
Dengue / QC	_TFSEWLESVKENPAVIDFELAPIVDLVR_	P13671	1.0406	1.0406	5.04786e-11	2.28654e-10	80	P13671	C6	Complement component C6	CO6_HUMAN	1	105.708	2.05708	Dengue	QC	NaN	NaN	NaN	42.9797	0.130441
Dengue / QC	_TVIGPDGHK_	P02671	1.69221	1.69221	5.15553e-11	2.32989e-10	84	P02671	FGA	Fibrinogen alpha chain	FIBA_HUMAN	1	223.152	3.23152	Dengue	QC	NaN	NaN	NaN	78.7791	0.246541
Dengue / QC	_LRYTTEIIK_	B4DPQ0	1.31812	1.31812	5.3107e-11	2.39083e-10	44	B4DPQ0	C1R	Complement C1r subcomponent	B4DPQ0_HUMAN	1	149.341	2.49341	Dengue	QC	NaN	NaN	NaN	37.6739	0.214845
Dengue / QC	_LVPPM[Oxidation (M)]EEDYPQFGSPK_	P08697	0.0405241	0.0405241	5.47781e-11	2.46042e-10	20	P08697	SERPINF2	Alpha-2-antiplasmin	A2AP_HUMAN	1	2.84874	1.02849	Dengue	QC	NaN	NaN	NaN	10.3655	0.185735
Dengue / QC	_QLYNVEATSYALLALLQLK_	P01024	0.360504	0.360504	5.61536e-11	2.51835e-10	32	P01024	C3	Complement C3	CO3_HUMAN	1	28.3874	1.28387	Dengue	QC	NaN	NaN	NaN	25.9235	0.0794486
Dengue / QC	_GGETSEM[Oxidation (M)]YLIQPDSSVKPYR_	P02675	3.57747	3.57747	5.70727e-11	2.55373e-10	46	P02675	FGB	Fibrinogen beta chain	FIBB_HUMAN	1	1093.78	11.9378	Dengue	QC	NaN	NaN	NaN	25.1627	0.329194
Dengue / QC	_RLTLQGIISWGSGC[Carbamidomethyl (C)]GDR_	P00748	1.26201	1.26201	5.84729e-11	2.61241e-10	116	P00748	F12	Coagulation factor XII	FA12_HUMAN	1	139.83	2.3983	Dengue	QC	NaN	NaN	NaN	87.1421	0.179134
Dengue / QC	_AC[Carbamidomethyl (C)]GAC[Carbamidomethyl (C)]PLWGKC[Carbamidomethyl (C)]DAESSK_	P10643	2.71764	2.71764	5.85295e-11	2.61296e-10	52	P10643	C7	Complement component C7	CO7_HUMAN	1	557.797	6.57797	Dengue	QC	NaN	NaN	NaN	38.8599	0.248403
Dengue / QC	_C[Carbamidomethyl (C)]FESFER_	Q92954-3	1.35125	1.35125	6.04089e-11	2.6887e-10	58	Q92954-3	PRG4	Isoform C of Proteoglycan 4	PRG4_HUMAN	1	155.133	2.55133	Dengue	QC	NaN	NaN	NaN	33.9338	0.118695
Dengue / QC	_HSTFIPGTNK_	P08519	1.02901	1.02901	6.06552e-11	2.69558e-10	64	P08519	LPA	Apolipoprotein(a)	APOA_HUMAN	1	104.062	2.04062	Dengue	QC	NaN	NaN	NaN	55.3784	0.141798
Dengue / QC	_LM[Oxidation (M)]NIFLKDSITTWEILAVSMSDKK_	P01024	1.1829	1.1829	6.09517e-11	2.7006e-10	94	P01024	C3	Complement C3	CO3_HUMAN	1	127.032	2.27032	Dengue	QC	NaN	NaN	NaN	58.2299	0.183448
Dengue / QC	_KLSFYYLIMAKGGIVR_	P01023	0.966006	0.966006	6.13708e-11	2.71713e-10	30	P01023	A2M	Alpha-2-macroglobulin	A2MG_HUMAN	1	95.3426	1.95343	Dengue	QC	NaN	NaN	NaN	19.7977	0.186068
Dengue / QC	_MLQITNTGFEMK_	P20742	2.52686	2.52686	6.20734e-11	2.74036e-10	76	P20742	PZP	Pregnancy zone protein	PZP_HUMAN	1	476.315	5.76315	Dengue	QC	NaN	NaN	NaN	49.6614	0.277784
Dengue / QC	_DLATVYVDVLKDSGRDYVSQFEGSALGK_	P02647	0.682054	0.682054	6.2082e-11	2.74036e-10	118	P02647	APOA1	Apolipoprotein A-I	APOA1_HUMAN	1	60.4422	1.60442	Dengue	QC	NaN	NaN	NaN	50.9415	0.094518
Dengue / QC	_FTC[Carbamidomethyl (C)]TVTHTDLPSPLK_	P01871	-0.548603	0.548603	6.47328e-11	2.85523e-10	176	P01871	IGHM	Immunoglobulin heavy constant mu	IGHM_HUMAN	1	-31.6318	0.683682	Dengue	QC	NaN	NaN	NaN	94.9019	0.0696139
Dengue / QC	_KFPSGTFEQVSQLVKEVVSLTEAC[Carbamidomethyl (C)]C[Carbamidomethyl (C)]AEGADPDC[Carbamidomethyl (C)]YDTR_	P02774;P02774-3	4.95087	4.95087	6.74958e-11	2.96765e-10	38	P02774;P02774-3	GC	Vitamin D-binding protein;Isoform 3 of Vitamin D-binding protein	VTDB_HUMAN	1	2992.87	30.9287	Dengue	QC	NaN	NaN	NaN	30.8747	0.512886
Dengue / QC	_TSTADYAMFK_	P02679;P02679-2	2.83285	2.83285	6.77108e-11	2.97321e-10	128	P02679;P02679-2	FGG	Fibrinogen gamma chain;Isoform Gamma-A of Fibrinogen gamma chain	FIBG_HUMAN	1	612.483	7.12483	Dengue	QC	NaN	NaN	NaN	99.4832	0.3386
Dengue / QC	_VGDTYERPKDSMIWDC[Carbamidomethyl (C)]TC[Carbamidomethyl (C)]IGAGR_	P02751;P02751-15;P02751-3;P02751-7	2.05396	2.05396	6.78171e-11	2.97566e-10	42	P02751;P02751-15;P02751-3;P02751-7	FN1	Fibronectin;Isoform 15 of Fibronectin;Isoform 3 of Fibronectin;Isoform 7 of Fibronectin	FINC_HUMAN	1	315.243	4.15243	Dengue	QC	NaN	NaN	NaN	36.7305	0.349697
Dengue / QC	_FKTGTTLKYTC[Carbamidomethyl (C)]LPGYVR_	P04003	1.38739	1.38739	6.79192e-11	2.97792e-10	136	P04003	C4BPA	C4b-binding protein alpha chain	C4BPA_HUMAN	1	161.605	2.61605	Dengue	QC	NaN	NaN	NaN	106.958	0.183246
Dengue / QC	_TTMKIIPFNRLTIGEGQQHHLGGAK_	P02679;P02679-2	3.0973	3.0973	6.90189e-11	3.02163e-10	32	P02679;P02679-2	FGG	Fibrinogen gamma chain;Isoform Gamma-A of Fibrinogen gamma chain	FIBG_HUMAN	1	755.816	8.55816	Dengue	QC	NaN	NaN	NaN	22.3313	0.213764
Dengue / QC	_AGELEVFNGYFVHFFAPDNLDPIPK_	P19823	0.745945	0.745945	7.57242e-11	3.3029e-10	174	P19823	ITIH2	Inter-alpha-trypsin inhibitor heavy chain H2	ITIH2_HUMAN	1	67.7073	1.67707	Dengue	QC	NaN	NaN	NaN	113.526	0.0950254
Dengue / QC	_YQKEEFC[Carbamidomethyl (C)]GLLSSPTGPLSSC[Carbamidomethyl (C)]HK_	Q9Y6R7	1.62228	1.62228	7.64157e-11	3.33059e-10	36	Q9Y6R7	FCGBP	IgGFc-binding protein	FCGBP_HUMAN	1	207.861	3.07861	Dengue	QC	NaN	NaN	NaN	31.3465	0.202457
Dengue / QC	_DTLM[Oxidation (M)]ISRTPEVTC[Carbamidomethyl (C)]VVVDVSHEDPEVK_	P01857	-1.11259	1.11259	7.71513e-11	3.36016e-10	76	P01857	IGHG1	Immunoglobulin heavy constant gamma 1	IGHG1_HUMAN	1	-53.7537	0.462463	Dengue	QC	NaN	NaN	NaN	23.2391	0.531928
Dengue / QC	_EVYM[Oxidation (M)]PSSIFQDDFVIPDISEPGTWK_	P0C0L5	1.08306	1.08306	7.78668e-11	3.38882e-10	168	P0C0L5	C4B	Complement C4-B	CO4B_HUMAN	1	111.853	2.11853	Dengue	QC	NaN	NaN	NaN	109.355	0.111229
Dengue / QC	_DNC[Carbamidomethyl (C)]C[Carbamidomethyl (C)]ILDER_	P02679;P02679-2	3.00136	3.00136	7.92201e-11	3.44262e-10	138	P02679;P02679-2	FGG	Fibrinogen gamma chain;Isoform Gamma-A of Fibrinogen gamma chain	FIBG_HUMAN	1	700.756	8.00756	Dengue	QC	NaN	NaN	NaN	107.087	0.379791
Dengue / QC	_C[Carbamidomethyl (C)]HAGHLNGVYYQGGTYSK_	P02679;P02679-2	2.55057	2.55057	8.17326e-11	3.54657e-10	38	P02679;P02679-2	FGG	Fibrinogen gamma chain;Isoform Gamma-A of Fibrinogen gamma chain	FIBG_HUMAN	1	485.865	5.85865	Dengue	QC	NaN	NaN	NaN	30.2576	0.208507
Dengue / QC	_C[Carbamidomethyl (C)]C[Carbamidomethyl (C)]VEC[Carbamidomethyl (C)]PPC[Carbamidomethyl (C)]PAPPVAGPSVFLFPPKPKDTLM[Oxidation (M)]ISR_	P01859	5.62037	5.62037	8.25766e-11	3.58055e-10	20	P01859	IGHG2	Immunoglobulin heavy constant gamma 2	IGHG2_HUMAN	1	4819.27	49.1927	Dengue	QC	NaN	NaN	NaN	13.3919	0.268453
Dengue / QC	_RLDYQEGPPGVEISC[Carbamidomethyl (C)]WSVEL_	Q14624	0.899083	0.899083	8.54692e-11	3.70052e-10	172	Q14624	ITIH4	Inter-alpha-trypsin inhibitor heavy chain H4	ITIH4_HUMAN	1	86.4881	1.86488	Dengue	QC	NaN	NaN	NaN	82.9636	0.11018
Dengue / QC	_SC[Carbamidomethyl (C)]DKTHTC[Carbamidomethyl (C)]PPC[Carbamidomethyl (C)]PAPELLGGPSVFLFPPKPK_	P01857	0.864452	0.864452	8.59384e-11	3.7181e-10	176	P01857	IGHG1	Immunoglobulin heavy constant gamma 1	IGHG1_HUMAN	1	82.0648	1.82065	Dengue	QC	NaN	NaN	NaN	161.615	0.0988508
Dengue / QC	_C[Carbamidomethyl (C)]VC[Carbamidomethyl (C)]PVSNAMC[Carbamidomethyl (C)]R_	Q12805;Q12805-2;Q12805-4	0.985336	0.985336	8.75654e-11	3.78293e-10	74	Q12805;Q12805-2;Q12805-4	EFEMP1	EGF-containing fibulin-like extracellular matrix protein 1;Isoform 2 of EGF-containing fibulin-like extracellular matrix protein 1;Isoform 4 of EGF-containing fibulin-like extracellular matrix protein 1	FBLN3_HUMAN	1	97.9774	1.97977	Dengue	QC	NaN	NaN	NaN	66.3227	0.163583
Dengue / QC	_TSESGELHGLTTEEEFVEGIYKVEIDTK_	P02766	1.1424	1.1424	8.78975e-11	3.79449e-10	174	P02766	TTR	Transthyretin	TTHY_HUMAN	1	120.747	2.20747	Dengue	QC	NaN	NaN	NaN	119.693	0.124001
Dengue / QC	_VQLSNDFDEYIM[Oxidation (M)]AIEQTIKSGSDEVQVGQQR_	P01024	3.46948	3.46948	8.88973e-11	3.83203e-10	46	P01024	C3	Complement C3	CO3_HUMAN	1	1007.69	11.0769	Dengue	QC	NaN	NaN	NaN	20.3683	0.456607
Dengue / QC	_ELPQSIVYK_	Q12805;Q12805-2;Q12805-4	1.13694	1.13694	9.00676e-11	3.87963e-10	112	Q12805;Q12805-2;Q12805-4	EFEMP1	EGF-containing fibulin-like extracellular matrix protein 1;Isoform 2 of EGF-containing fibulin-like extracellular matrix protein 1;Isoform 4 of EGF-containing fibulin-like extracellular matrix protein 1	FBLN3_HUMAN	1	119.914	2.19914	Dengue	QC	NaN	NaN	NaN	104.375	0.157245
Dengue / QC	_NPDGDVGGPWC[Carbamidomethyl (C)]YTTNPRK_	P00747	1.71554	1.71554	9.17385e-11	3.94872e-10	58	P00747	PLG	Plasminogen	PLMN_HUMAN	1	228.42	3.2842	Dengue	QC	NaN	NaN	NaN	41.7861	0.176392
Dengue / QC	_VFLDC[Carbamidomethyl (C)]C[Carbamidomethyl (C)]NYITELR_	P01024	0.760194	0.760194	9.36974e-11	4.01833e-10	110	P01024	C3	Complement C3	CO3_HUMAN	1	69.3719	1.69372	Dengue	QC	NaN	NaN	NaN	95.0779	0.114487
Dengue / QC	_AFQPFFVELTMPYSVIRGEAFTLKATVLNYLPK_	P01023	1.47778	1.47778	9.63924e-11	4.1189e-10	58	P01023	A2M	Alpha-2-macroglobulin	A2MG_HUMAN	1	178.52	2.7852	Dengue	QC	NaN	NaN	NaN	48.642	0.166197
Dengue / QC	_VQQNVPSGTDTGDPQSKPLGDWAAGTMDPESSIFIEDAIK_	O14791;O14791-2	0.687858	0.687858	9.79656e-11	4.18006e-10	96	O14791;O14791-2	APOL1	Apolipoprotein L1;Isoform 2 of Apolipoprotein L1	APOL1_HUMAN	1	61.089	1.61089	Dengue	QC	NaN	NaN	NaN	67.8251	0.101694
Dengue / QC	_IEGSNKVPVDPATYGQFYGGDSYIILYNYR_	P06396	0.853101	0.853101	9.91683e-11	4.22524e-10	168	P06396	GSN	Gelsolin	GELS_HUMAN	1	80.638	1.80638	Dengue	QC	NaN	NaN	NaN	82.3559	0.0909405
Dengue / QC	_EDYLDVYVFGVGPLVNQVNINALASK_	B4E1Z4	1.2371	1.2371	1.00567e-10	4.27246e-10	140	B4E1Z4	NaN	cDNA FLJ55673, highly similar to Complement factor B (EC 3.4.21.47)	B4E1Z4_HUMAN	1	135.725	2.35725	Dengue	QC	NaN	NaN	NaN	34.3906	0.111678
Dengue / QC	_TLADLTLLDSPIK_	P04114	0.484379	0.484379	1.0236e-10	4.34238e-10	136	P04114	APOB	Apolipoprotein B-100	APOB_HUMAN	1	39.8984	1.39898	Dengue	QC	NaN	NaN	NaN	97.1755	0.0719615
Dengue / QC	_EEAPSLRPAPPPISGGGYR_	P02675	2.93624	2.93624	1.03895e-10	4.40431e-10	116	P02675	FGB	Fibrinogen beta chain	FIBB_HUMAN	1	665.415	7.65415	Dengue	QC	NaN	NaN	NaN	91.1721	0.358025
Dengue / QC	_GSFQC[Carbamidomethyl (C)]GPC[Carbamidomethyl (C)]QPGFVGDQASGC[Carbamidomethyl (C)]QR_	G3XAP6;P49747	1.64528	1.64528	1.04864e-10	4.439e-10	48	G3XAP6;P49747	COMP	Cartilage oligomeric matrix protein	G3XAP6_HUMAN;COMP_HUMAN	1	212.809	3.12809	Dengue	QC	NaN	NaN	NaN	33.8077	0.221475
Dengue / QC	_GFYPSDIAVEWESSGQPENNYNTTPPMLDSDGSFFLYSK_	P01860	2.26329	2.26329	1.07324e-10	4.52686e-10	42	P01860	IGHG3	Immunoglobulin heavy constant gamma 3	IGHG3_HUMAN	1	380.084	4.80084	Dengue	QC	NaN	NaN	NaN	34.2923	0.247465
Dengue / QC	_PVAFSVVPTAATAVSLK_	P0C0L5	2.7139	2.7139	1.07922e-10	4.54882e-10	14	P0C0L5	C4B	Complement C4-B	CO4B_HUMAN	1	556.095	6.56095	Dengue	QC	NaN	NaN	NaN	6.96651	0.150473
Dengue / QC	_LISVDTEHSNIYLQNGPDRIGR_	P00450	0.841151	0.841151	1.08194e-10	4.55699e-10	118	P00450	CP	Ceruloplasmin	CERU_HUMAN	1	79.1479	1.79148	Dengue	QC	NaN	NaN	NaN	81.7988	0.0914753
Dengue / QC	_LWAYLTIQELLAK_	P19827	1.04675	1.04675	1.15911e-10	4.86115e-10	118	P19827	ITIH1	Inter-alpha-trypsin inhibitor heavy chain H1	ITIH1_HUMAN	1	106.587	2.06587	Dengue	QC	NaN	NaN	NaN	83.1948	0.158657
Dengue / QC	_VLDAVRGSPAINVAVHVFRK_	P02766	1.18067	1.18067	1.16862e-10	4.89755e-10	86	P02766	TTR	Transthyretin	TTHY_HUMAN	1	126.681	2.26681	Dengue	QC	NaN	NaN	NaN	62.981	0.145548
Dengue / QC	_FC[Carbamidomethyl (C)]EAEFSVK_	Q16610	1.18902	1.18902	1.23823e-10	5.17455e-10	70	Q16610	ECM1	Extracellular matrix protein 1	ECM1_HUMAN	1	127.998	2.27998	Dengue	QC	NaN	NaN	NaN	60.3799	0.159643
Dengue / QC	_LNILNNNYK_	O14791;O14791-2	0.554855	0.554855	1.25501e-10	5.22611e-10	134	O14791;O14791-2	APOL1	Apolipoprotein L1;Isoform 2 of Apolipoprotein L1	APOL1_HUMAN	1	46.9021	1.46902	Dengue	QC	NaN	NaN	NaN	104.032	0.0935961
Dengue / QC	_C[Carbamidomethyl (C)]QKRPC[Carbamidomethyl (C)]GHPGDTPFGTFTLTGGNVFEYGVK_	P08603	2.13986	2.13986	1.26446e-10	5.258e-10	50	P08603	CFH	Complement factor H	CFAH_HUMAN	1	340.72	4.4072	Dengue	QC	NaN	NaN	NaN	43.5245	0.269153
Dengue / QC	_SIAYLQMNSLK_	A0A0A0MS15	-0.716846	0.716846	1.26908e-10	5.2735e-10	170	A0A0A0MS15	IGHV3-49	Immunoglobulin heavy variable 3-49	HV349_HUMAN	1	-39.1574	0.608426	Dengue	QC	NaN	NaN	NaN	74.1183	0.0912591
Dengue / QC	_IDQNVEELK_	P06727	0.419569	0.419569	1.27852e-10	5.30897e-10	154	P06727	APOA4	Apolipoprotein A-IV	APOA4_HUMAN	1	33.7528	1.33753	Dengue	QC	NaN	NaN	NaN	144.836	0.0712496
Dengue / QC	_YVMLPVADQDQC[Carbamidomethyl (C)]IRHYEGSTVPEKK_	P00738	3.69769	3.69769	1.31912e-10	5.46216e-10	72	P00738	HP	Haptoglobin	HPT_HUMAN	1	1197.52	12.9752	Dengue	QC	NaN	NaN	NaN	35.9965	0.389736
Dengue / QC	_YGIDWASGR_	O75636	-0.659399	0.659399	1.37877e-10	5.69312e-10	168	O75636	FCN3	Ficolin-3	FCN3_HUMAN	1	-36.6858	0.633142	Dengue	QC	NaN	NaN	NaN	60.3003	0.0876108
Dengue / QC	_ANLSSQALQMSLDYGFVTPLTSMSIR_	P19827	1.40422	1.40422	1.56404e-10	6.39973e-10	42	P19827	ITIH1	Inter-alpha-trypsin inhibitor heavy chain H1	ITIH1_HUMAN	1	164.675	2.64675	Dengue	QC	NaN	NaN	NaN	30.6924	0.148546
Dengue / QC	_FIAVGYVDDTQFVR_	P05534;P30447	1.95419	1.95419	1.64065e-10	6.68994e-10	24	P05534;P30447	HLA-A	HLA class I histocompatibility antigen, A-24 alpha chain;HLA class I histocompatibility antigen, A-23 alpha chain	1A24_HUMAN;1A23_HUMAN	1	287.499	3.87499	Dengue	QC	NaN	NaN	NaN	17.0321	0.218476
Dengue / QC	_DIFPNTVFADSNIDSVMAPDAFVC[Carbamidomethyl (C)]GR_	P03951	1.74833	1.74833	1.6669e-10	6.77819e-10	26	P03951	F11	Coagulation factor XI	FA11_HUMAN	1	235.969	3.35969	Dengue	QC	NaN	NaN	NaN	17.832	0.133605
Dengue / QC	_ASSIIDELFQDRFFTR_	P10909;P10909-2;P10909-4;P10909-5	0.836807	0.836807	1.69925e-10	6.9002e-10	152	P10909;P10909-2;P10909-4;P10909-5	CLU	Clusterin;Isoform 2 of Clusterin;Isoform 4 of Clusterin;Isoform 5 of Clusterin	CLUS_HUMAN	1	78.6092	1.78609	Dengue	QC	NaN	NaN	NaN	89.1517	0.128172
Dengue / QC	_VVTPLSPPTNLHLEANPDTGVLTVSWER_	P02751;P02751-15;P02751-3;P02751-7	0.919742	0.919742	1.7281e-10	7.01253e-10	110	P02751;P02751-15;P02751-3;P02751-7	FN1	Fibronectin;Isoform 15 of Fibronectin;Isoform 3 of Fibronectin;Isoform 7 of Fibronectin	FINC_HUMAN	1	89.1777	1.89178	Dengue	QC	NaN	NaN	NaN	71.6668	0.118516
Dengue / QC	_QFPFLASIQNQGR_	P20160	2.93646	2.93646	1.74631e-10	7.06689e-10	24	P20160	AZU1	Azurocidin	CAP7_HUMAN	1	665.529	7.65529	Dengue	QC	NaN	NaN	NaN	16.6449	0.246303
Dengue / QC	_NGFKSHALQLNNR_	P0C0L5	3.21215	3.21215	1.81405e-10	7.32089e-10	56	P0C0L5	C4B	Complement C4-B	CO4B_HUMAN	1	826.733	9.26733	Dengue	QC	NaN	NaN	NaN	44.7308	0.271464
Dengue / QC	_YGQPLPGYTTK_	A6XND0;P17936;P17936-2	0.586198	0.586198	1.84379e-10	7.43072e-10	46	A6XND0;P17936;P17936-2	IGFBP3	Insulin-like growth factor-binding protein 3;Insulin-like growth factor-binding protein 3;Isoform 2 of Insulin-like growth factor-binding protein 3	A6XND0_HUMAN;IBP3_HUMAN;IBP3_HUMAN	1	50.1285	1.50128	Dengue	QC	NaN	NaN	NaN	37.7821	0.0722699
Dengue / QC	_DSYYM[Oxidation (M)]TSSQLSTPLQQWR_	A0A0A0MS09;P01880;P01880-2	1.21748	1.21748	1.89887e-10	7.64225e-10	22	A0A0A0MS09;P01880;P01880-2	IGHD	Immunoglobulin heavy constant delta (Fragment);Immunoglobulin heavy constant delta;Isoform 2 of Immunoglobulin heavy constant delta	A0A0A0MS09_HUMAN;IGHD_HUMAN;IGHD_HUMAN	1	132.54	2.3254	Dengue	QC	NaN	NaN	NaN	11.7403	0.349362
Dengue / QC	_ILGEELGFASLHDLQLLGK_	P04114	0.902901	0.902901	1.97051e-10	7.89814e-10	80	P04114	APOB	Apolipoprotein B-100	APOB_HUMAN	1	86.9822	1.86982	Dengue	QC	NaN	NaN	NaN	62.735	0.114959
Dengue / QC	_YILQGVTSWGLGC[Carbamidomethyl (C)]ARPNKPGVYVR_	P00747	0.676394	0.676394	1.98565e-10	7.94799e-10	54	P00747	PLG	Plasminogen	PLMN_HUMAN	1	59.8141	1.59814	Dengue	QC	NaN	NaN	NaN	42.1163	0.0878812
Dengue / QC	_QLSLPETGELDSATLK_	P14780	0.659125	0.659125	2.00907e-10	8.03628e-10	58	P14780	MMP9	Matrix metalloproteinase-9	MMP9_HUMAN	1	57.9124	1.57912	Dengue	QC	NaN	NaN	NaN	33.5444	0.128548
Dengue / QC	_KVFLDC[Carbamidomethyl (C)]C[Carbamidomethyl (C)]NYITELRR_	P01024	0.583938	0.583938	2.05939e-10	8.2208e-10	74	P01024	C3	Complement C3	CO3_HUMAN	1	49.8935	1.49894	Dengue	QC	NaN	NaN	NaN	63.7096	0.0878732
Dengue / QC	_KQC[Carbamidomethyl (C)]SKEDGGGWWYNR_	P02675	1.75702	1.75702	2.06322e-10	8.23049e-10	40	P02675	FGB	Fibrinogen beta chain	FIBB_HUMAN	1	237.999	3.37999	Dengue	QC	NaN	NaN	NaN	35.6451	0.176293
Dengue / QC	_LNHQLEGLTFQMK_	P06727	0.556546	0.556546	2.10963e-10	8.40422e-10	134	P06727	APOA4	Apolipoprotein A-IV	APOA4_HUMAN	1	47.0744	1.47074	Dengue	QC	NaN	NaN	NaN	127.722	0.0796354
Dengue / QC	_LHLDYIGPC[Carbamidomethyl (C)]K_	P09486	0.622094	0.622094	2.11345e-10	8.41376e-10	56	P09486	SPARC	SPARC	SPRC_HUMAN	1	53.9108	1.53911	Dengue	QC	NaN	NaN	NaN	42.4967	0.104689
Dengue / QC	_PSETTLC[Carbamidomethyl (C)]QVAGWGHQFEGAEEYASFLQEAQVPFLSLER_	P00748	1.52089	1.52089	2.13612e-10	8.49827e-10	84	P00748	F12	Coagulation factor XII	FA12_HUMAN	1	186.968	2.86968	Dengue	QC	NaN	NaN	NaN	22.4163	0.108209
Dengue / QC	_SRLSSGLVTAALYGR_	P43251;P43251-2;P43251-3;P43251-4	0.465408	0.465408	2.14113e-10	8.51243e-10	126	P43251;P43251-2;P43251-3;P43251-4	BTD	Biotinidase;Isoform 2 of Biotinidase;Isoform 3 of Biotinidase;Isoform 4 of Biotinidase	BTD_HUMAN	1	38.0708	1.38071	Dengue	QC	NaN	NaN	NaN	100.315	0.120339
Dengue / QC	_EEM[Oxidation (M)]TKNQVSLTC[Carbamidomethyl (C)]LVK_	P01860	2.04304	2.04304	2.17814e-10	8.64206e-10	118	P01860	IGHG3	Immunoglobulin heavy constant gamma 3	IGHG3_HUMAN	1	312.112	4.12112	Dengue	QC	NaN	NaN	NaN	91.0016	0.232848
Dengue / QC	_LVTSKGDKELR_	P02671	2.83625	2.83625	2.19978e-10	8.71615e-10	142	P02671	FGA	Fibrinogen alpha chain	FIBA_HUMAN	1	614.161	7.14161	Dengue	QC	NaN	NaN	NaN	112.008	0.375848
Dengue / QC	_SAVTALWGKVNVDEVGGEALGR_	P68871	0.91173	0.91173	2.23347e-10	8.84369e-10	158	P68871	HBB	Hemoglobin subunit beta	HBB_HUMAN	1	88.13	1.8813	Dengue	QC	NaN	NaN	NaN	119.704	0.135702
Dengue / QC	_VTFHNKGAYPLSIEPIGVR_	P00450	1.39032	1.39032	2.32924e-10	9.19579e-10	142	P00450	CP	Ceruloplasmin	CERU_HUMAN	1	162.137	2.62137	Dengue	QC	NaN	NaN	NaN	119.76	0.187428
Dengue / QC	_ESDWLGQSM[Oxidation (M)]FTC[Carbamidomethyl (C)]R_	P01871	1.10962	1.10962	2.40469e-10	9.46407e-10	44	P01871	IGHM	Immunoglobulin heavy constant mu	IGHM_HUMAN	1	115.79	2.1579	Dengue	QC	NaN	NaN	NaN	30.8708	0.1489
Dengue / QC	_VSWIRQPPGKALEWLAR_	A0A0C4DH43	0.935464	0.935464	2.40623e-10	9.46407e-10	58	A0A0C4DH43	IGHV2-70D	Immunoglobulin heavy variable 2-70D	HV70D_HUMAN	1	91.2506	1.91251	Dengue	QC	NaN	NaN	NaN	26.341	0.140198
Dengue / QC	_RIPLYYPNAGLTR_	P08519	1.90412	1.90412	2.46183e-10	9.66985e-10	98	P08519	LPA	Apolipoprotein(a)	APOA_HUMAN	1	274.281	3.74281	Dengue	QC	NaN	NaN	NaN	68.2602	0.260383
Dengue / QC	_IDTINLFPATLFDAYMVAQNPGEWMLSC[Carbamidomethyl (C)]QNLNHLK_	P00450	0.849487	0.849487	2.61464e-10	1.02359e-09	90	P00450	CP	Ceruloplasmin	CERU_HUMAN	1	80.186	1.80186	Dengue	QC	NaN	NaN	NaN	39.6215	0.119372
Dengue / QC	_TMSGLEC[Carbamidomethyl (C)]QAWDSQSPHAHGYIPSKFPNKNLK_	P00747	1.09999	1.09999	2.681e-10	1.04748e-09	98	P00747	PLG	Plasminogen	PLMN_HUMAN	1	114.354	2.14354	Dengue	QC	NaN	NaN	NaN	86.6752	0.137168
Dengue / QC	_YVM[Oxidation (M)]LPVADQYDC[Carbamidomethyl (C)]ITHYEGSTC[Carbamidomethyl (C)]PK_	P00739	1.11173	1.11173	2.73735e-10	1.06878e-09	68	P00739	HPR	Haptoglobin-related protein	HPTR_HUMAN	1	116.105	2.16105	Dengue	QC	NaN	NaN	NaN	59.8038	0.170839
Dengue / QC	_GVTFLLR_	P04217	-0.507567	0.507567	2.75354e-10	1.07439e-09	174	P04217	A1BG	Alpha-1B-glycoprotein	A1BG_HUMAN	1	-29.6592	0.703408	Dengue	QC	NaN	NaN	NaN	80.8831	0.0699946
Dengue / QC	_DATC[Carbamidomethyl (C)]NC[Carbamidomethyl (C)]DYNC[Carbamidomethyl (C)]QHYMEC[Carbamidomethyl (C)]C[Carbamidomethyl (C)]PDFKR_	Q92954-3	1.38014	1.38014	2.78306e-10	1.08439e-09	42	Q92954-3	PRG4	Isoform C of Proteoglycan 4	PRG4_HUMAN	1	160.294	2.60294	Dengue	QC	NaN	NaN	NaN	37.338	0.17817
Dengue / QC	_ETTFNSLLC[Carbamidomethyl (C)]PSGGEVSEELSLK_	P01023	0.64217	0.64217	2.86314e-10	1.11415e-09	146	P01023	A2M	Alpha-2-macroglobulin	A2MG_HUMAN	1	56.0674	1.56067	Dengue	QC	NaN	NaN	NaN	133.497	0.104636
Dengue / QC	_KEDSC[Carbamidomethyl (C)]QLGYSAGPC[Carbamidomethyl (C)]M[Oxidation (M)]GMTSR_	P02760	1.51043	1.51043	2.87673e-10	1.11801e-09	32	P02760	AMBP	Protein AMBP	AMBP_HUMAN	1	184.896	2.84896	Dengue	QC	NaN	NaN	NaN	27.5349	0.150585
Dengue / QC	_KSISAALEHKVSALLTPAEQTGTWK_	P04114	2.90719	2.90719	2.90157e-10	1.12692e-09	38	P04114	APOB	Apolipoprotein B-100	APOB_HUMAN	1	650.157	7.50157	Dengue	QC	NaN	NaN	NaN	20.7053	0.249541
Dengue / QC	_LWAYLTIQQLLEQTVSASDADQQALR_	Q14624	1.09477	1.09477	2.90553e-10	1.12771e-09	64	Q14624	ITIH4	Inter-alpha-trypsin inhibitor heavy chain H4	ITIH4_HUMAN	1	113.578	2.13578	Dengue	QC	NaN	NaN	NaN	26.4754	0.122071
Dengue / QC	_VTM[Oxidation (M)]TEDTSTDTAYMELSSLR_	A0A0C4DH33	0.972158	0.972158	2.93189e-10	1.13719e-09	48	A0A0C4DH33	IGHV1-24	Immunoglobulin heavy variable 1-24	HV124_HUMAN	1	96.1773	1.96177	Dengue	QC	NaN	NaN	NaN	24.3601	0.455612
Dengue / QC	_RITEVWGIPSPIDTVFTR_	Q92954-3	0.874105	0.874105	3.01888e-10	1.16632e-09	132	Q92954-3	PRG4	Isoform C of Proteoglycan 4	PRG4_HUMAN	1	83.287	1.83287	Dengue	QC	NaN	NaN	NaN	64.3519	0.115733
Dengue / QC	_ALLVGEHLNIIVTPK_	P01031	0.526337	0.526337	3.02131e-10	1.1665e-09	98	P01031	C5	Complement C5	CO5_HUMAN	1	44.0268	1.44027	Dengue	QC	NaN	NaN	NaN	83.9984	0.101854
Dengue / QC	_LLIYSNNQR_	P01699	1.33703	1.33703	3.0508e-10	1.17711e-09	66	P01699	IGLV1-44	Immunoglobulin lambda variable 1-44	LV144_HUMAN	1	152.631	2.52631	Dengue	QC	NaN	NaN	NaN	55.3284	0.179595
Dengue / QC	_TVGSDTFYSFKYEIKEGDC[Carbamidomethyl (C)]PVQSGK_	P01042	1.00681	1.00681	3.07239e-10	1.18466e-09	102	P01042	KNG1	Kininogen-1	KNG1_HUMAN	1	100.946	2.00946	Dengue	QC	NaN	NaN	NaN	93.8025	0.133394
Dengue / QC	_ILEGFQPSGR_	P80108	0.472198	0.472198	3.12026e-10	1.20155e-09	120	P80108	GPLD1	Phosphatidylinositol-glycan-specific phospholipase D	PHLD_HUMAN	1	38.7221	1.38722	Dengue	QC	NaN	NaN	NaN	103.284	0.0595556
Dengue / QC	_FTISRDNAKNTLYLQMNSLR_	A0A0B4J1X5	0.329289	0.329289	3.19527e-10	1.22722e-09	156	A0A0B4J1X5	IGHV3-74	Immunoglobulin heavy variable 3-74	HV374_HUMAN	1	25.6394	1.25639	Dengue	QC	NaN	NaN	NaN	93.0705	0.20439
Dengue / QC	_HPEAK[Carboxy]RMPC[Carbamidomethyl (C)]AE[Carboxy]D[Carboxy]YLSVVLNQLC[Carbamidomethyl (C)]VLHEK_	P02768	0.50496	0.50496	3.20259e-10	1.22842e-09	146	P02768	ALB	Serum albumin	ALBU_HUMAN	1	41.9084	1.41908	Dengue	QC	NaN	NaN	NaN	109.66	0.143926
Dengue / QC	_SSVAAMHWMDGSVVTR_	P22891;P22891-2	0.890033	0.890033	3.2502e-10	1.24507e-09	70	P22891;P22891-2	PROZ	Vitamin K-dependent protein Z;Isoform 2 of Vitamin K-dependent protein Z	PROZ_HUMAN	1	85.3219	1.85322	Dengue	QC	NaN	NaN	NaN	33.8351	0.125956
Dengue / QC	_MGPTELLIEMEDWK_	P02675	3.29896	3.29896	3.25251e-10	1.24514e-09	40	P02675	FGB	Fibrinogen beta chain	FIBB_HUMAN	1	884.207	9.84207	Dengue	QC	NaN	NaN	NaN	25.9589	0.302639
Dengue / QC	_C[Carbamidomethyl (C)]VYLQTSMK_	P20742	3.68302	3.68302	3.34959e-10	1.27897e-09	38	P20742	PZP	Pregnancy zone protein	PZP_HUMAN	1	1184.4	12.844	Dengue	QC	NaN	NaN	NaN	31.9767	0.445252
Dengue / QC	_WYLFGMGNEVDVHAAFFHGQALTNK_	P00450	1.46364	1.46364	3.45718e-10	1.31834e-09	28	P00450	CP	Ceruloplasmin	CERU_HUMAN	1	175.803	2.75803	Dengue	QC	NaN	NaN	NaN	18.3022	0.104993
Dengue / QC	_TIKVPMMYGAGK_	G3V2W1;Q9UK55	0.576302	0.576302	3.51721e-10	1.34037e-09	52	G3V2W1;Q9UK55	SERPINA10	Protein Z-dependent protease inhibitor	G3V2W1_HUMAN;ZPI_HUMAN	1	49.1023	1.49102	Dengue	QC	NaN	NaN	NaN	38.2709	0.0889129
Dengue / QC	_S[Acetyl (Protein N-term)]ETAPAETATPAPVEK_	P16401	1.70473	1.70473	3.6408e-10	1.38477e-09	20	P16401	HIST1H1B	Histone H1.5	H15_HUMAN	1	225.969	3.25969	Dengue	QC	NaN	NaN	NaN	11.8733	0.393507
Dengue / QC	_WEDPGKQLYNVEATSYALLALLQLK_	P01024	0.386297	0.386297	3.68075e-10	1.39816e-09	46	P01024	C3	Complement C3	CO3_HUMAN	1	30.7034	1.30703	Dengue	QC	NaN	NaN	NaN	35.8992	0.115658
Dengue / QC	_GRTLEIPGNSDPNM[Oxidation (M)]IPDGDFNSYVR_	P0C0L5	1.65135	1.65135	3.77635e-10	1.43355e-09	110	P0C0L5	C4B	Complement C4-B	CO4B_HUMAN	1	214.128	3.14128	Dengue	QC	NaN	NaN	NaN	97.538	0.272586
Dengue / QC	_C[Carbamidomethyl (C)]NLLAEKQYGFC[Carbamidomethyl (C)]K_	P02765	1.79341	1.79341	3.88558e-10	1.47312e-09	150	P02765	AHSG	Alpha-2-HS-glycoprotein	FETUA_HUMAN	1	246.633	3.46633	Dengue	QC	NaN	NaN	NaN	119.714	0.238822
Dengue / QC	_EPC[Carbamidomethyl (C)]VESLVSQYFQTVTDYGKDLMEK_	P02652;V9GYM3	0.693852	0.693852	3.90662e-10	1.48014e-09	170	P02652;V9GYM3	APOA2	Apolipoprotein A-II	APOA2_HUMAN;V9GYM3_HUMAN	1	61.7597	1.6176	Dengue	QC	NaN	NaN	NaN	68.948	0.0909159
Dengue / QC	_M[Oxidation (M)]YYSAVEPTKDIFTGLIGPMK_	E9PFZ2	0.467922	0.467922	3.97063e-10	1.50053e-09	94	E9PFZ2	CP	Ceruloplasmin	E9PFZ2_HUMAN	1	38.3116	1.38312	Dengue	QC	NaN	NaN	NaN	65.8028	0.211119
Dengue / QC	_SRWQQGNIFSC[Carbamidomethyl (C)]SVMHEALHNRFTQK_	P01860	1.94838	1.94838	4.04134e-10	1.52431e-09	90	P01860	IGHG3	Immunoglobulin heavy constant gamma 3	IGHG3_HUMAN	1	285.94	3.8594	Dengue	QC	NaN	NaN	NaN	60.2497	0.205724
Dengue / QC	_GEWTC[Carbamidomethyl (C)]KPIAEK_	P02751;P02751-15;P02751-3;P02751-7	0.630171	0.630171	4.05313e-10	1.52778e-09	120	P02751;P02751-15;P02751-3;P02751-7	FN1	Fibronectin;Isoform 15 of Fibronectin;Isoform 3 of Fibronectin;Isoform 7 of Fibronectin	FINC_HUMAN	1	54.7749	1.54775	Dengue	QC	NaN	NaN	NaN	100.948	0.100761
Dengue / QC	_IGEKWDR_	P02751;P02751-15;P02751-3;P02751-7	1.53651	1.53651	4.29609e-10	1.61316e-09	62	P02751;P02751-15;P02751-3;P02751-7	FN1	Fibronectin;Isoform 15 of Fibronectin;Isoform 3 of Fibronectin;Isoform 7 of Fibronectin	FINC_HUMAN	1	190.093	2.90093	Dengue	QC	NaN	NaN	NaN	54.0207	0.177085
Dengue / QC	_GGGAGFISGLSYLELDNPAGNKRR_	P10643	3.07756	3.07756	4.42477e-10	1.65936e-09	36	P10643	C7	Complement component C7	CO7_HUMAN	1	744.188	8.44188	Dengue	QC	NaN	NaN	NaN	25.0884	0.272947
Dengue / QC	_EESSSGSSHAVMDISLPTGISANEEDLK_	P01031	0.711173	0.711173	4.54156e-10	1.70207e-09	86	P01031	C5	Complement C5	CO5_HUMAN	1	63.7135	1.63714	Dengue	QC	NaN	NaN	NaN	73.0891	0.0977957
Dengue / QC	_NSITLTNLTPGTEYVVSIVALNGR_	P02751;P02751-15;P02751-3;P02751-7	1.41339	1.41339	4.59258e-10	1.7201e-09	68	P02751;P02751-15;P02751-3;P02751-7	FN1	Fibronectin;Isoform 15 of Fibronectin;Isoform 3 of Fibronectin;Isoform 7 of Fibronectin	FINC_HUMAN	1	166.362	2.66362	Dengue	QC	NaN	NaN	NaN	45.3732	0.194408
Dengue / QC	_DYNLNDILLQLGIEEAFTSK_	P01011	1.44895	1.44895	4.85311e-10	1.8039e-09	138	P01011	SERPINA3	Alpha-1-antichymotrypsin	AACT_HUMAN	1	173.01	2.7301	Dengue	QC	NaN	NaN	NaN	61.2273	0.175665
Dengue / QC	_ITFELVYEELLK_	Q14624	0.688175	0.688175	4.96477e-10	1.84191e-09	150	Q14624	ITIH4	Inter-alpha-trypsin inhibitor heavy chain H4	ITIH4_HUMAN	1	61.1244	1.61124	Dengue	QC	NaN	NaN	NaN	81.7845	0.136874
Dengue / QC	_LTVDKSRWQQGNVFSC[Carbamidomethyl (C)]SVMHEALHNHYTQK_	P01857	1.89062	1.89062	5.07796e-10	1.8768e-09	72	P01857	IGHG1	Immunoglobulin heavy constant gamma 1	IGHG1_HUMAN	1	270.795	3.70795	Dengue	QC	NaN	NaN	NaN	59.8208	0.310119
Dengue / QC	_C[Carbamidomethyl (C)]C[Carbamidomethyl (C)]QDGVTR_	P0C0L5	0.761344	0.761344	5.16871e-10	1.90914e-09	134	P0C0L5	C4B	Complement C4-B	CO4B_HUMAN	1	69.5069	1.69507	Dengue	QC	NaN	NaN	NaN	104.73	0.117608
Dengue / QC	_QEALELMNQNLDIYEQQVMTAAQK_	P43251;P43251-2;P43251-3;P43251-4	0.879701	0.879701	5.22284e-10	1.92551e-09	36	P43251;P43251-2;P43251-3;P43251-4	BTD	Biotinidase;Isoform 2 of Biotinidase;Isoform 3 of Biotinidase;Isoform 4 of Biotinidase	BTD_HUMAN	1	83.9994	1.83999	Dengue	QC	NaN	NaN	NaN	18.6657	0.117596
Dengue / QC	_TLVQEWTVQRPGQTC[Carbamidomethyl (C)]QPILEEQC[Carbamidomethyl (C)]LVPDSSHC[Carbamidomethyl (C)]QVLLLPLFAEC[Carbamidomethyl (C)]HK_	P04275	0.889875	0.889875	5.44264e-10	2.00153e-09	44	P04275	VWF	von Willebrand factor	VWF_HUMAN	1	85.3016	1.85302	Dengue	QC	NaN	NaN	NaN	38.9286	0.162044
Dengue / QC	_IQC[Carbamidomethyl (C)]AAGYEQSEHNVC[Carbamidomethyl (C)]QDIDEC[Carbamidomethyl (C)]TAGTHNC[Carbamidomethyl (C)]R_	Q12805;Q12805-2;Q12805-4	1.03803	1.03803	5.63522e-10	2.06332e-09	110	Q12805;Q12805-2;Q12805-4	EFEMP1	EGF-containing fibulin-like extracellular matrix protein 1;Isoform 2 of EGF-containing fibulin-like extracellular matrix protein 1;Isoform 4 of EGF-containing fibulin-like extracellular matrix protein 1	FBLN3_HUMAN	1	105.342	2.05342	Dengue	QC	NaN	NaN	NaN	104.737	0.130744
Dengue / QC	_QGFGNVATNTDGKNYC[Carbamidomethyl (C)]GLPGEYWLGNDKISQLTR_	P02675	1.73299	1.73299	5.65834e-10	2.0705e-09	44	P02675	FGB	Fibrinogen beta chain	FIBB_HUMAN	1	232.417	3.32417	Dengue	QC	NaN	NaN	NaN	37.5859	0.224159
Dengue / QC	_GDK[Carboxy]VW[Carboxy]VYPPEKK_	P02790	0.85155	0.85155	5.70254e-10	2.08538e-09	60	P02790	HPX	Hemopexin	HEMO_HUMAN	1	80.4439	1.80444	Dengue	QC	NaN	NaN	NaN	39.0498	0.16927
Dengue / QC	_GGMRKFIC[Carbamidomethyl (C)]PLTGLWPINTLK_	P02749	1.37381	1.37381	5.87366e-10	2.14529e-09	162	P02749	APOH	Beta-2-glycoprotein 1	APOH_HUMAN	1	159.155	2.59155	Dengue	QC	NaN	NaN	NaN	145.044	0.16795
Dengue / QC	_KLFDYC[Carbamidomethyl (C)]DIPLC[Carbamidomethyl (C)]ASSSFDC[Carbamidomethyl (C)]GKPQVEPK_	P08519	1.92078	1.92078	5.98191e-10	2.18347e-09	46	P08519	LPA	Apolipoprotein(a)	APOA_HUMAN	1	278.628	3.78628	Dengue	QC	NaN	NaN	NaN	38.8119	0.220282
Dengue / QC	_NQGILEFYGDDIALLK_	B4E1Z4	1.22605	1.22605	6.10072e-10	2.22546e-09	44	B4E1Z4	NaN	cDNA FLJ55673, highly similar to Complement factor B (EC 3.4.21.47)	B4E1Z4_HUMAN	1	133.925	2.33925	Dengue	QC	NaN	NaN	NaN	32.4956	0.116408
Dengue / QC	_NLNEKDYELLC[Carbamidomethyl (C)]LDGTRK_	P02787	1.64925	1.64925	6.12336e-10	2.23233e-09	88	P02787	TF	Serotransferrin	TRFE_HUMAN	1	213.67	3.1367	Dengue	QC	NaN	NaN	NaN	46.9221	0.201606
Dengue / QC	_TPAYYPNAGLIK_	P08519	1.29323	1.29323	6.14035e-10	2.23714e-09	136	P08519	LPA	Apolipoprotein(a)	APOA_HUMAN	1	145.075	2.45075	Dengue	QC	NaN	NaN	NaN	112.608	0.201671
Dengue / QC	_DAHLTWEVAGK_	A0A0A0MS09;P01880;P01880-2	2.0548	2.0548	6.21554e-10	2.26174e-09	22	A0A0A0MS09;P01880;P01880-2	IGHD	Immunoglobulin heavy constant delta (Fragment);Immunoglobulin heavy constant delta;Isoform 2 of Immunoglobulin heavy constant delta	A0A0A0MS09_HUMAN;IGHD_HUMAN;IGHD_HUMAN	1	315.485	4.15485	Dengue	QC	NaN	NaN	NaN	16.0777	0.153408
Dengue / QC	_LKEEIGKELEELR_	P06727	1.13835	1.13835	6.43147e-10	2.33453e-09	44	P06727	APOA4	Apolipoprotein A-IV	APOA4_HUMAN	1	120.129	2.20129	Dengue	QC	NaN	NaN	NaN	30.3979	0.133776
Dengue / QC	_MEPFHFKNSVIKVPMMNSK_	P05155;P05155-3	1.3721	1.3721	6.5806e-10	2.38425e-09	120	P05155;P05155-3	SERPING1	Plasma protease C1 inhibitor;Isoform 3 of Plasma protease C1 inhibitor	IC1_HUMAN	1	158.846	2.58846	Dengue	QC	NaN	NaN	NaN	89.0825	0.201656
Dengue / QC	_GQYC[Carbamidomethyl (C)]YELDEKAVRPGYPK_	P04004	3.60923	3.60923	6.70002e-10	2.42453e-09	36	P04004	VTN	Vitronectin	VTNC_HUMAN	1	1120.35	12.2035	Dengue	QC	NaN	NaN	NaN	16.2559	0.206409
Dengue / QC	_SC[Carbamidomethyl (C)]DIPVFM[Oxidation (M)]NAR_	P08603	0.949295	0.949295	6.76492e-10	2.44501e-09	120	P08603	CFH	Complement factor H	CFAH_HUMAN	1	93.0929	1.93093	Dengue	QC	NaN	NaN	NaN	112.993	0.148609
Dengue / QC	_TVLSPVEPSC[Carbamidomethyl (C)]EGMQC[Carbamidomethyl (C)]AAGQR_	Q9Y6R7	2.23736	2.23736	6.77905e-10	2.44861e-09	40	Q9Y6R7	FCGBP	IgGFc-binding protein	FCGBP_HUMAN	1	371.535	4.71535	Dengue	QC	NaN	NaN	NaN	35.4508	0.252612
Dengue / QC	_ALEWLAR_	A0A0C4DH43	-0.703389	0.703389	6.7847e-10	2.44915e-09	174	A0A0C4DH43	IGHV2-70D	Immunoglobulin heavy variable 2-70D	HV70D_HUMAN	1	-38.5872	0.614128	Dengue	QC	NaN	NaN	NaN	76.5696	0.102061
Dengue / QC	_VLRENADSLQASLRPHADELK_	P06727	0.602527	0.602527	6.8372e-10	2.46659e-09	164	P06727	APOA4	Apolipoprotein A-IV	APOA4_HUMAN	1	51.8374	1.51837	Dengue	QC	NaN	NaN	NaN	114.829	0.0904037
Dengue / QC	_LKAKLPDATPTELAK_	D6RF35	1.59998	1.59998	7.28287e-10	2.61455e-09	78	D6RF35	GC	Vitamin D-binding protein	D6RF35_HUMAN	1	203.14	3.0314	Dengue	QC	NaN	NaN	NaN	64.6183	0.164713
Dengue / QC	_TAGYGINILGM[Oxidation (M)]DPLSTPFDNEFYNGLC[Carbamidomethyl (C)]NR_	P02748	0.393505	0.393505	7.40965e-10	2.65844e-09	46	P02748	C9	Complement component C9	CO9_HUMAN	1	31.3581	1.31358	Dengue	QC	NaN	NaN	NaN	23.2277	0.237674
Dengue / QC	_TPC[Carbamidomethyl (C)]TVSC[Carbamidomethyl (C)]NIPVVSGKEC[Carbamidomethyl (C)]EEIIRK_	P02675	2.7886	2.7886	7.41964e-10	2.6604e-09	86	P02675	FGB	Fibrinogen beta chain	FIBB_HUMAN	1	590.957	6.90957	Dengue	QC	NaN	NaN	NaN	65.6586	0.324276
Dengue / QC	_LVTDLTKVHTEC[Carbamidomethyl (C)]C[Carbamidomethyl (C)]HGDLLEC[Carbamidomethyl (C)]ADDRADLAK_	P02768	1.57329	1.57329	7.55351e-10	2.70675e-09	174	P02768	ALB	Serum albumin	ALBU_HUMAN	1	197.583	2.97583	Dengue	QC	NaN	NaN	NaN	144.981	0.211363
Dengue / QC	_DGFDISGNPWIC[Carbamidomethyl (C)]DQNLSDLYR_	P02750	0.56014	0.56014	7.69632e-10	2.75457e-09	136	P02750	LRG1	Leucine-rich alpha-2-glycoprotein	A2GL_HUMAN	1	47.4412	1.47441	Dengue	QC	NaN	NaN	NaN	115.459	0.107231
Dengue / QC	_VGFAEAARL_	A0A1B0GV23;A0A1B0GVD5;A0A1B0GWE8;P07339	0.959692	0.959692	7.85285e-10	2.80889e-09	46	A0A1B0GV23;A0A1B0GVD5;A0A1B0GWE8;P07339	CTSD	Cathepsin D	A0A1B0GV23_HUMAN;A0A1B0GVD5_HUMAN;A0A1B0GWE8_HUMAN;CATD_HUMAN	1	94.4895	1.9449	Dengue	QC	NaN	NaN	NaN	37.3311	0.160298
Dengue / QC	_LC[Carbamidomethyl (C)]MGSGLNLC[Carbamidomethyl (C)]E[Carboxy]PNNKEGYYGYTGAFR_	P02787	0.5671	0.5671	8.15654e-10	2.91397e-09	160	P02787	TF	Serotransferrin	TRFE_HUMAN	1	48.1543	1.48154	Dengue	QC	NaN	NaN	NaN	92.0872	0.404235
Dengue / QC	_FVTWIEGVMR_	P00747	0.236069	0.236069	8.26799e-10	2.952e-09	136	P00747	PLG	Plasminogen	PLMN_HUMAN	1	17.7779	1.17778	Dengue	QC	NaN	NaN	NaN	102.109	0.0912129
Dengue / QC	_VGLSGM[Oxidation (M)]AIADVTLLSGFHALR_	P0C0L5	-0.0091998	0.0091998	8.33161e-10	2.9729e-09	98	P0C0L5	C4B	Complement C4-B	CO4B_HUMAN	1	-0.635653	0.993643	Dengue	QC	NaN	NaN	NaN	72.4662	0.172579
Dengue / QC	_IQLVEEELDRAQER_	P67936	1.01471	1.01471	8.39165e-10	2.9907e-09	98	P67936	TPM4	Tropomyosin alpha-4 chain	TPM4_HUMAN	1	102.049	2.02049	Dengue	QC	NaN	NaN	NaN	71.6354	0.157418
Dengue / QC	_YSFTIELR_	A0A087WSY5;Q96IY4	0.688608	0.688608	8.94864e-10	3.17383e-09	140	A0A087WSY5;Q96IY4	CPB2	Carboxypeptidase B2	A0A087WSY5_HUMAN;CBPB2_HUMAN	1	61.1728	1.61173	Dengue	QC	NaN	NaN	NaN	70.8433	0.106892
Dengue / QC	_C[Carbamidomethyl (C)]VNSPGSFR_	P23142	1.00464	1.00464	9.08209e-10	3.21922e-09	88	P23142	FBLN1	Fibulin-1	FBLN1_HUMAN	1	100.644	2.00644	Dengue	QC	NaN	NaN	NaN	81.9436	0.158789
Dengue / QC	_TVIGPDGHKEVTK_	P02671	3.03793	3.03793	9.18288e-10	3.25299e-09	92	P02671	FGA	Fibrinogen alpha chain	FIBA_HUMAN	1	721.31	8.2131	Dengue	QC	NaN	NaN	NaN	65.0864	0.381267
Dengue / QC	_GTVIDVTDFVNWASSINDAPVLISQK_	P02748	0.626928	0.626928	9.23809e-10	3.27057e-09	116	P02748	C9	Complement component C9	CO9_HUMAN	1	54.4273	1.54427	Dengue	QC	NaN	NaN	NaN	105.923	0.104617
Dengue / QC	_PGQAPVLVIYGK_	P01714	1.20306	1.20306	9.25125e-10	3.27326e-09	42	P01714	IGLV3-19	Immunoglobulin lambda variable 3-19	LV319_HUMAN	1	130.228	2.30228	Dengue	QC	NaN	NaN	NaN	21.5607	0.368556
Dengue / QC	_VQYEC[Carbamidomethyl (C)]ATGYYTAGGK_	P05160	0.212117	0.212117	9.33034e-10	3.29728e-09	120	P05160	F13B	Coagulation factor XIII B chain	F13B_HUMAN	1	15.8387	1.15839	Dengue	QC	NaN	NaN	NaN	92.7667	0.0635179
Dengue / QC	_ADGSPVKVGVETTKPSK_	A0M8Q6	1.83546	1.83546	9.50786e-10	3.35397e-09	58	A0M8Q6	IGLC7	Immunoglobulin lambda constant 7	IGLC7_HUMAN	1	256.884	3.56884	Dengue	QC	NaN	NaN	NaN	44.3598	0.251606
Dengue / QC	_EVGPPLPQEAVPLQK_	Q16610	1.05846	1.05846	9.52545e-10	3.35816e-09	54	Q16610	ECM1	Extracellular matrix protein 1	ECM1_HUMAN	1	108.271	2.08271	Dengue	QC	NaN	NaN	NaN	43.3129	0.15965
Dengue / QC	_TEQWSTLPPETK_	P0C0L5	1.73619	1.73619	1.00045e-09	3.52285e-09	24	P0C0L5	C4B	Complement C4-B	CO4B_HUMAN	1	233.153	3.33153	Dengue	QC	NaN	NaN	NaN	19.7822	0.198894
Dengue / QC	_MELERPGGNEITR_	P02671	3.05048	3.05048	1.00651e-09	3.54205e-09	146	P02671	FGA	Fibrinogen alpha chain	FIBA_HUMAN	1	728.486	8.28486	Dengue	QC	NaN	NaN	NaN	119.605	0.384429
Dengue / QC	_GLEWVANIK_	P01780	-0.823453	0.823453	1.02305e-09	3.59811e-09	166	P01780	IGHV3-7	Immunoglobulin heavy variable 3-7	HV307_HUMAN	1	-43.4912	0.565088	Dengue	QC	NaN	NaN	NaN	65.5752	0.11281
Dengue / QC	_AEDLVGKSLYVSATVILHSGSDMVQAER_	P01024	1.48625	1.48625	1.04003e-09	3.64911e-09	126	P01024	C3	Complement C3	CO3_HUMAN	1	180.16	2.8016	Dengue	QC	NaN	NaN	NaN	101.861	0.183901
Dengue / QC	_INENTGSVSVTR_	P55290;P55290-4	0.863424	0.863424	1.07053e-09	3.74941e-09	108	P55290;P55290-4	CDH13	Cadherin-13;Isoform 4 of Cadherin-13	CAD13_HUMAN	1	81.9351	1.81935	Dengue	QC	NaN	NaN	NaN	36.5862	0.152541
Dengue / QC	_DNENVVNEYSSELEK_	P02675	2.0942	2.0942	1.09574e-09	3.83084e-09	134	P02675	FGB	Fibrinogen beta chain	FIBB_HUMAN	1	326.989	4.26989	Dengue	QC	NaN	NaN	NaN	107.986	0.333913
Dengue / QC	_YVTSAPMPEPQAPGR_	P01871	-0.719308	0.719308	1.10732e-09	3.86674e-09	176	P01871	IGHM	Immunoglobulin heavy constant mu	IGHM_HUMAN	1	-39.2611	0.607389	Dengue	QC	NaN	NaN	NaN	57.9292	0.0976237
Dengue / QC	_IALGGLLFPASNLRLPLVPALDGC[Carbamidomethyl (C)]LR_	I3L145;P04278	1.26459	1.26459	1.10967e-09	3.87267e-09	46	I3L145;P04278	SHBG	Sex hormone-binding globulin	I3L145_HUMAN;SHBG_HUMAN	1	140.259	2.40259	Dengue	QC	NaN	NaN	NaN	37.8874	0.19086
Dengue / QC	_DEPTYILNIKR_	P04114	2.13197	2.13197	1.1496e-09	4.00963e-09	20	P04114	APOB	Apolipoprotein B-100	APOB_HUMAN	1	338.316	4.38316	Dengue	QC	NaN	NaN	NaN	12.5527	0.134455
Dengue / QC	_IMADSGPIYDK_	P07996	1.05751	1.05751	1.15138e-09	4.01347e-09	42	P07996	THBS1	Thrombospondin-1	TSP1_HUMAN	1	108.134	2.08134	Dengue	QC	NaN	NaN	NaN	24.9349	0.130218
Dengue / QC	_SGIPIVTSPYQIHFTKTPK_	P01024	1.73481	1.73481	1.17981e-09	4.10768e-09	128	P01024	C3	Complement C3	CO3_HUMAN	1	232.837	3.32837	Dengue	QC	NaN	NaN	NaN	102.419	0.220272
Dengue / QC	_DLATVYVDVLKDSGR_	P02647	0.363744	0.363744	1.20768e-09	4.19232e-09	162	P02647	APOA1	Apolipoprotein A-I	APOA1_HUMAN	1	28.6761	1.28676	Dengue	QC	NaN	NaN	NaN	87.8419	0.0865457
Dengue / QC	_NFDEILR_	P30041	1.5641	1.5641	1.23716e-09	4.28707e-09	22	P30041	PRDX6	Peroxiredoxin-6	PRDX6_HUMAN	1	195.694	2.95694	Dengue	QC	NaN	NaN	NaN	13.3433	0.138136
Dengue / QC	_RYKAAFTEC[Carbamidomethyl (C)]C[Carbamidomethyl (C)]QAADK_	P02768	3.63919	3.63919	1.24261e-09	4.30344e-09	52	P02768	ALB	Serum albumin	ALBU_HUMAN	1	1145.97	12.4597	Dengue	QC	NaN	NaN	NaN	32.2678	0.355317
Dengue / QC	_AKVFKDVFLEMNIPYSVVR_	P01031	0.652569	0.652569	1.25505e-09	4.33885e-09	76	P01031	C5	Complement C5	CO5_HUMAN	1	57.1965	1.57196	Dengue	QC	NaN	NaN	NaN	56.2503	0.0948748
Dengue / QC	_VGLSGMAIADVTLLSGFHALRADLEK_	P0C0L5	0.710694	0.710694	1.25652e-09	4.34138e-09	48	P0C0L5	C4B	Complement C4-B	CO4B_HUMAN	1	63.6592	1.63659	Dengue	QC	NaN	NaN	NaN	21.9535	0.255393
Dengue / QC	_FTEDAKR_	P01011	1.03333	1.03333	1.26817e-09	4.37781e-09	82	P01011	SERPINA3	Alpha-1-antichymotrypsin	AACT_HUMAN	1	104.675	2.04675	Dengue	QC	NaN	NaN	NaN	61.5366	0.151645
Dengue / QC	_AIGYATAADC[Carbamidomethyl (C)]GR_	Q9Y6R7	1.28421	1.28421	1.26855e-09	4.37781e-09	98	Q9Y6R7	FCGBP	IgGFc-binding protein	FCGBP_HUMAN	1	143.549	2.43549	Dengue	QC	NaN	NaN	NaN	79.4953	0.208844
Dengue / QC	_LSSVTAVD[Carboxy]TAVYYC[Carbamidomethyl (C)]AR_	A0A0C4DH34	1.01312	1.01312	1.27611e-09	4.39873e-09	78	A0A0C4DH34	IGHV4-28	Immunoglobulin heavy variable 4-28	HV428_HUMAN	1	101.828	2.01828	Dengue	QC	NaN	NaN	NaN	28.9983	0.688747
Dengue / QC	_FGMHFC[Carbamidomethyl (C)]GGTLISPEWVLTAAHC[Carbamidomethyl (C)]LEK_	P00747	0.584057	0.584057	1.29672e-09	4.46194e-09	162	P00747	PLG	Plasminogen	PLMN_HUMAN	1	49.9059	1.49906	Dengue	QC	NaN	NaN	NaN	88.0971	0.090584
Dengue / QC	_ASQHGSDVVIETDFGLR_	Q9Y6R7	1.81448	1.81448	1.33494e-09	4.5854e-09	86	Q9Y6R7	FCGBP	IgGFc-binding protein	FCGBP_HUMAN	1	251.733	3.51733	Dengue	QC	NaN	NaN	NaN	66.1691	0.243984
Dengue / QC	_SLDFNTLVDNISVDPETGDLWVGC[Carbamidomethyl (C)]HPNGMK_	P27169	0.732411	0.732411	1.35105e-09	4.63531e-09	88	P27169	PON1	Serum paraoxonase/arylesterase 1	PON1_HUMAN	1	66.1413	1.66141	Dengue	QC	NaN	NaN	NaN	39.1669	0.0973702
Dengue / QC	_TLSDVLQYVK_	P48740-2	0.614365	0.614365	1.38937e-09	4.75848e-09	50	P48740-2	MASP1	Isoform 2 of Mannan-binding lectin serine protease 1	MASP1_HUMAN	1	53.0884	1.53088	Dengue	QC	NaN	NaN	NaN	33.3839	0.112707
Dengue / QC	_LWLEGNPWDC[Carbamidomethyl (C)]GC[Carbamidomethyl (C)]PLK_	P35858;P35858-2	0.500227	0.500227	1.40498e-09	4.80913e-09	136	P35858;P35858-2	IGFALS	Insulin-like growth factor-binding protein complex acid labile subunit;Isoform 2 of Insulin-like growth factor-binding protein complex acid labile subunit	ALS_HUMAN	1	41.4436	1.41444	Dengue	QC	NaN	NaN	NaN	107.587	0.0771879
Dengue / QC	_RLEVDIDIK_	P02671	3.29964	3.29964	1.41518e-09	4.84122e-09	72	P02671	FGA	Fibrinogen alpha chain	FIBA_HUMAN	1	884.668	9.84668	Dengue	QC	NaN	NaN	NaN	55.7317	0.433993
Dengue / QC	_VSITSITVENVFVK_	P01031	1.01359	1.01359	1.43123e-09	4.88761e-09	68	P01031	C5	Complement C5	CO5_HUMAN	1	101.893	2.01893	Dengue	QC	NaN	NaN	NaN	61.7662	0.145199
Dengue / QC	_WVMVPMMSLHHLTIPYFRDEELSC[Carbamidomethyl (C)]TVVELK_	P01011	1.33112	1.33112	1.4599e-09	4.97686e-09	86	P01011	SERPINA3	Alpha-1-antichymotrypsin	AACT_HUMAN	1	151.598	2.51598	Dengue	QC	NaN	NaN	NaN	74.6867	0.183668
Dengue / QC	_TVTINC[Carbamidomethyl (C)]PFKTENAQK_	P01833	1.9964	1.9964	1.49129e-09	5.07211e-09	24	P01833	PIGR	Polymeric immunoglobulin receptor	PIGR_HUMAN	1	299.004	3.99004	Dengue	QC	NaN	NaN	NaN	19.2191	0.215583
Dengue / QC	_VADALTNAVAHVDDMPNALSALSDLHAHK_	P69905	0.603974	0.603974	1.49736e-09	5.08687e-09	162	P69905	HBA1	Hemoglobin subunit alpha	HBA_HUMAN	1	51.9898	1.5199	Dengue	QC	NaN	NaN	NaN	143.573	0.0615676
Dengue / QC	_FRC[Carbamidomethyl (C)]PEALFQPSFLGMESC[Carbamidomethyl (C)]GIHETTFNSIMK_	P60709	2.73851	2.73851	1.62095e-09	5.48456e-09	30	P60709	ACTB	Actin, cytoplasmic 1	ACTB_HUMAN	1	567.381	6.67381	Dengue	QC	NaN	NaN	NaN	23.7425	0.300286
Dengue / QC	_LLDSLPSDTRLVLLNAIYLSAK_	P05155;P05155-3	0.588464	0.588464	1.62508e-09	5.49537e-09	56	P05155;P05155-3	SERPING1	Plasma protease C1 inhibitor;Isoform 3 of Plasma protease C1 inhibitor	IC1_HUMAN	1	50.3645	1.50365	Dengue	QC	NaN	NaN	NaN	35.6622	0.185026
Dengue / QC	_KYPVAHFIDQTLKAK_	P05155;P05155-3	2.66376	2.66376	1.63472e-09	5.52165e-09	26	P05155;P05155-3	SERPING1	Plasma protease C1 inhibitor;Isoform 3 of Plasma protease C1 inhibitor	IC1_HUMAN	1	533.683	6.33683	Dengue	QC	NaN	NaN	NaN	20.1622	0.20763
Dengue / QC	_AFLEVNEEGSEAAASTAVVIAGR_	P01008	0.699373	0.699373	1.72521e-09	5.81392e-09	168	P01008	SERPINC1	Antithrombin-III	ANT3_HUMAN	1	62.3799	1.6238	Dengue	QC	NaN	NaN	NaN	123.869	0.100369
Dengue / QC	_FTDHLKYVMLPVADQDQC[Carbamidomethyl (C)]IR_	P00738	2.69969	2.69969	1.7504e-09	5.87863e-09	72	P00738	HP	Haptoglobin	HPT_HUMAN	1	549.661	6.49661	Dengue	QC	NaN	NaN	NaN	53.7226	0.359441
Dengue / QC	_GQPREPQVYTLPPSQEEMTKNQVSLTC[Carbamidomethyl (C)]LVK_	P01861	1.64456	1.64456	1.77865e-09	5.96668e-09	80	P01861	IGHG4	Immunoglobulin heavy constant gamma 4	IGHG4_HUMAN	1	212.653	3.12653	Dengue	QC	NaN	NaN	NaN	63.3989	0.239335
Dengue / QC	_EHAVEGDC[Carbamidomethyl (C)]DFQLLKLDGK_	P02765	0.917837	0.917837	1.82963e-09	6.13423e-09	172	P02765	AHSG	Alpha-2-HS-glycoprotein	FETUA_HUMAN	1	88.9281	1.88928	Dengue	QC	NaN	NaN	NaN	164.562	0.129855
Dengue / QC	_TYTC[Carbamidomethyl (C)]NVDHKPSNTKVDK_	P01861	1.36986	1.36986	1.87858e-09	6.28043e-09	140	P01861	IGHG4	Immunoglobulin heavy constant gamma 4	IGHG4_HUMAN	1	158.445	2.58445	Dengue	QC	NaN	NaN	NaN	119.545	0.154306
Dengue / QC	_LEAGINQLSFPLSSEPIQGSYR_	P20742	3.13904	3.13904	1.87832e-09	6.28043e-09	68	P20742	PZP	Pregnancy zone protein	PZP_HUMAN	1	780.936	8.80936	Dengue	QC	NaN	NaN	NaN	43.781	0.352862
Dengue / QC	_VYPGEQYTYM[Oxidation (M)]LLATEEQSPGEGDGNC[Carbamidomethyl (C)]VTR_	P00450	0.348232	0.348232	1.88282e-09	6.28746e-09	126	P00450	CP	Ceruloplasmin	CERU_HUMAN	1	27.3	1.273	Dengue	QC	NaN	NaN	NaN	52.4027	0.638411
Dengue / QC	_NRNVHSGSTFFKYYLQGAK_	Q14624	2.02072	2.02072	1.8844e-09	6.28918e-09	32	Q14624	ITIH4	Inter-alpha-trypsin inhibitor heavy chain H4	ITIH4_HUMAN	1	305.786	4.05786	Dengue	QC	NaN	NaN	NaN	24.8703	0.240458
Dengue / QC	_VMPIC[Carbamidomethyl (C)]LPSKNYAEVGR_	P00739	1.04516	1.04516	1.9416e-09	6.46541e-09	138	P00739	HPR	Haptoglobin-related protein	HPTR_HUMAN	1	106.359	2.06359	Dengue	QC	NaN	NaN	NaN	118.576	0.138829
Dengue / QC	_KLWAYLTINQLLAER_	P19823	0.653957	0.653957	1.96978e-09	6.55182e-09	158	P19823	ITIH2	Inter-alpha-trypsin inhibitor heavy chain H2	ITIH2_HUMAN	1	57.3478	1.57348	Dengue	QC	NaN	NaN	NaN	118.505	0.108993
Dengue / QC	_IVSSAMEPDR_	P08603	0.832634	0.832634	1.98733e-09	6.60647e-09	74	P08603	CFH	Complement factor H	CFAH_HUMAN	1	78.0934	1.78093	Dengue	QC	NaN	NaN	NaN	28.4292	0.133634
Dengue / QC	_TLNLAQNLLAQLPEELFHPLTSLQTLK_	P22792	0.723378	0.723378	2.00319e-09	6.65545e-09	70	P22792	CPN2	Carboxypeptidase N subunit 2	CPN2_HUMAN	1	65.1043	1.65104	Dengue	QC	NaN	NaN	NaN	53.2956	0.119431
Dengue / QC	_SGSSTASWIQNVDTK_	P04114	0.54476	0.54476	2.06971e-09	6.86093e-09	90	P04114	APOB	Apolipoprotein B-100	APOB_HUMAN	1	45.8778	1.45878	Dengue	QC	NaN	NaN	NaN	64.4296	0.0938899
Dengue / QC	_FLFDTKEEILMHLWR_	Q96KN2	1.24841	1.24841	2.08216e-09	6.89056e-09	44	Q96KN2	CNDP1	Beta-Ala-His dipeptidase	CNDP1_HUMAN	1	137.579	2.37579	Dengue	QC	NaN	NaN	NaN	37.0097	0.177794
Dengue / QC	_C[Carbamidomethyl (C)]NPGTGQC[Carbamidomethyl (C)]VC[Carbamidomethyl (C)]PAGWVGEQC[Carbamidomethyl (C)]QHC[Carbamidomethyl (C)]GGR_	O75882;O75882-2	0.867686	0.867686	2.09515e-09	6.92418e-09	126	O75882;O75882-2	ATRN	Attractin;Isoform 2 of Attractin	ATRN_HUMAN	1	82.4734	1.82473	Dengue	QC	NaN	NaN	NaN	63.1209	0.117843
Dengue / QC	_QLYNVEATSYALLALLQLKDFDFVPPVVR_	P01024	0.966741	0.966741	2.13896e-09	7.05045e-09	70	P01024	C3	Complement C3	CO3_HUMAN	1	95.442	1.95442	Dengue	QC	NaN	NaN	NaN	36.5127	0.157632
Dengue / QC	_C[Carbamidomethyl (C)]GPASVQAIK_	P00488	3.29208	3.29208	2.13902e-09	7.05045e-09	30	P00488	F13A1	Coagulation factor XIII A chain	F13A_HUMAN	1	879.524	9.79524	Dengue	QC	NaN	NaN	NaN	18.8625	0.340802
Dengue / QC	_VTIM[Oxidation (M)]WTPPESAVTGYR_	P02751;P02751-15;P02751-3;P02751-7	2.71451	2.71451	2.13835e-09	7.05045e-09	22	P02751;P02751-15;P02751-3;P02751-7	FN1	Fibronectin;Isoform 15 of Fibronectin;Isoform 3 of Fibronectin;Isoform 7 of Fibronectin	FINC_HUMAN	1	556.372	6.56372	Dengue	QC	NaN	NaN	NaN	15.7498	0.344002
Dengue / QC	_WSHPPSC[Carbamidomethyl (C)]IKTDC[Carbamidomethyl (C)]LSLPSFENAIPMGEK_	P08603	1.36156	1.36156	2.24641e-09	7.39255e-09	106	P08603	CFH	Complement factor H	CFAH_HUMAN	1	156.963	2.56963	Dengue	QC	NaN	NaN	NaN	88.915	0.188995
Dengue / QC	_C[Carbamidomethyl (C)]LAYDFYPGKIDVHWTR_	P25311	1.70616	1.70616	2.3083e-09	7.58774e-09	120	P25311	AZGP1	Zinc-alpha-2-glycoprotein	ZA2G_HUMAN	1	226.291	3.26291	Dengue	QC	NaN	NaN	NaN	82.1597	0.188812
Dengue / QC	_QSTLVLFPGDLR_	P14780	1.25739	1.25739	2.34242e-09	7.68701e-09	68	P14780	MMP9	Matrix metalloproteinase-9	MMP9_HUMAN	1	139.063	2.39063	Dengue	QC	NaN	NaN	NaN	50.3396	0.212688
Dengue / QC	_EPC[Carbamidomethyl (C)]VESLVSQYFQTVTDYGK_	P02652;V9GYM3	0.591501	0.591501	2.45221e-09	8.0249e-09	156	P02652;V9GYM3	APOA2	Apolipoprotein A-II	APOA2_HUMAN;V9GYM3_HUMAN	1	50.6814	1.50681	Dengue	QC	NaN	NaN	NaN	124.734	0.0827127
Dengue / QC	_LDLQEINNWVQAQMK_	P36955	0.757569	0.757569	2.4794e-09	8.1094e-09	106	P36955	SERPINF1	Pigment epithelium-derived factor	PEDF_HUMAN	1	69.0639	1.69064	Dengue	QC	NaN	NaN	NaN	57.7477	0.157794
Dengue / QC	_SGLSTGWTQLSKLLELTGPKSLPAPWLSM[Oxidation (M)]APVSWITPGLK_	P04217	1.79579	1.79579	2.50211e-09	8.17005e-09	88	P04217	A1BG	Alpha-1B-glycoprotein	A1BG_HUMAN	1	247.206	3.47206	Dengue	QC	NaN	NaN	NaN	40.2178	0.411964
Dengue / QC	_IMADSGPIYDKTYAGGR_	P07996	1.01076	1.01076	2.53747e-09	8.2809e-09	28	P07996	THBS1	Thrombospondin-1	TSP1_HUMAN	1	101.497	2.01497	Dengue	QC	NaN	NaN	NaN	22.0549	0.116134
Dengue / QC	_MADEAGSEADHEGTHSTKR_	P02671	2.01075	2.01075	2.55078e-09	8.31972e-09	162	P02671	FGA	Fibrinogen alpha chain	FIBA_HUMAN	1	302.993	4.02993	Dengue	QC	NaN	NaN	NaN	117.525	0.274521
Dengue / QC	_SHC[Carbamidomethyl (C)]IAEVENDEMPADLPSLAADFVESKDVC[Carbamidomethyl (C)]K_	P02768	0.789715	0.789715	2.59639e-09	8.46381e-09	176	P02768	ALB	Serum albumin	ALBU_HUMAN	1	72.8733	1.72873	Dengue	QC	NaN	NaN	NaN	127.906	0.119306
Dengue / QC	_IYGNQDTSSQLKKFYNQVSTPLLR_	P19823	0.92147	0.92147	2.7392e-09	8.90466e-09	116	P19823	ITIH2	Inter-alpha-trypsin inhibitor heavy chain H2	ITIH2_HUMAN	1	89.4044	1.89404	Dengue	QC	NaN	NaN	NaN	97.3892	0.111946
Dengue / QC	_C[Carbamidomethyl (C)]LVNLIEK_	B4E1Z4	0.341085	0.341085	2.74984e-09	8.92938e-09	92	B4E1Z4	NaN	cDNA FLJ55673, highly similar to Complement factor B (EC 3.4.21.47)	B4E1Z4_HUMAN	1	26.6709	1.26671	Dengue	QC	NaN	NaN	NaN	77.2857	0.0657614
Dengue / QC	_HYYIAAEEIIWNYAPSGIDIFTK_	P00450	1.46484	1.46484	2.82463e-09	9.13695e-09	52	P00450	CP	Ceruloplasmin	CERU_HUMAN	1	176.034	2.76034	Dengue	QC	NaN	NaN	NaN	33.4742	0.167577
Dengue / QC	_VLSIAQAHSPAFSC[Carbamidomethyl (C)]EQVR_	P08571	0.73899	0.73899	2.84215e-09	9.18858e-09	50	P08571	CD14	Monocyte differentiation antigen CD14	CD14_HUMAN	1	66.9007	1.66901	Dengue	QC	NaN	NaN	NaN	21.5065	0.087578
Dengue / QC	_KNPREDYLDVYVFGVGPLVNQVNINALASK_	B4E1Z4	0.731803	0.731803	2.93893e-09	9.47336e-09	140	B4E1Z4	NaN	cDNA FLJ55673, highly similar to Complement factor B (EC 3.4.21.47)	B4E1Z4_HUMAN	1	66.0713	1.66071	Dengue	QC	NaN	NaN	NaN	109.498	0.10378
Dengue / QC	_YVGGQEHFAHLLILR_	P02763	-0.417376	0.417376	3.0477e-09	9.80464e-09	176	P02763	ORM1	Alpha-1-acid glycoprotein 1	A1AG1_HUMAN	1	-25.1215	0.748785	Dengue	QC	NaN	NaN	NaN	118.833	0.0661084
Dengue / QC	_GISSTTVTGR_	P08519	1.79594	1.79594	3.14027e-09	1.00859e-08	84	P08519	LPA	Apolipoprotein(a)	APOA_HUMAN	1	247.241	3.47241	Dengue	QC	NaN	NaN	NaN	71.555	0.255427
Dengue / QC	_GLVWVSR_	A0A075B7E8	-0.567559	0.567559	3.14524e-09	1.00963e-08	176	A0A075B7E8	IGHV3OR16-13	Immunoglobulin heavy variable 3/OR16-13 (non-functional) (Fragment)	A0A075B7E8_HUMAN	1	-32.5243	0.674757	Dengue	QC	NaN	NaN	NaN	66.7509	0.0823402
Dengue / QC	_VSNGAGTM[Oxidation (M)]SVSLVADENPFAQGALK_	P06396	0.898777	0.898777	3.21278e-09	1.03019e-08	16	P06396	GSN	Gelsolin	GELS_HUMAN	1	86.4485	1.86448	Dengue	QC	NaN	NaN	NaN	7.85972	0.159683
Dengue / QC	_IIPFNRLTIGEGQQHHLGGAK_	P02679;P02679-2	1.97575	1.97575	3.3284e-09	1.06263e-08	32	P02679;P02679-2	FGG	Fibrinogen gamma chain;Isoform Gamma-A of Fibrinogen gamma chain	FIBG_HUMAN	1	293.334	3.93334	Dengue	QC	NaN	NaN	NaN	23.0668	0.175159
Dengue / QC	_LYPIANGNNQSPVDIK_	P00915	1.13688	1.13688	3.41598e-09	1.08764e-08	56	P00915	CA1	Carbonic anhydrase 1	CAH1_HUMAN	1	119.905	2.19905	Dengue	QC	NaN	NaN	NaN	40.4071	0.152721
Dengue / QC	_LHELQEKLSPLGEEMRDR_	P02647	1.40909	1.40909	3.50801e-09	1.1135e-08	122	P02647	APOA1	Apolipoprotein A-I	APOA1_HUMAN	1	165.57	2.6557	Dengue	QC	NaN	NaN	NaN	111.034	0.183695
Dengue / QC	_LEEAEKAADESER_	P67936	1.0111	1.0111	3.55187e-09	1.12482e-08	36	P67936	TPM4	Tropomyosin alpha-4 chain	TPM4_HUMAN	1	101.545	2.01545	Dengue	QC	NaN	NaN	NaN	28.3626	0.120774
Dengue / QC	_LGYVTADGETSGSITC[Carbamidomethyl (C)]GKDGWSAQPTC[Carbamidomethyl (C)]IK_	P08603	2.08219	2.08219	3.74355e-09	1.18108e-08	140	P08603	CFH	Complement factor H	CFAH_HUMAN	1	323.448	4.23448	Dengue	QC	NaN	NaN	NaN	111.861	0.314333
Dengue / QC	_SMGGKEDLIWELLNQAQEHFGKDK_	P02787	0.580831	0.580831	3.95891e-09	1.24501e-08	176	P02787	TF	Serotransferrin	TRFE_HUMAN	1	49.571	1.49571	Dengue	QC	NaN	NaN	NaN	165.237	0.100299
Dengue / QC	_AHVDALRTHLAPYSDELRQR_	P02647	0.949232	0.949232	4.01432e-09	1.26109e-08	60	P02647	APOA1	Apolipoprotein A-I	APOA1_HUMAN	1	93.0845	1.93084	Dengue	QC	NaN	NaN	NaN	54.1311	0.119379
Dengue / QC	_GDKVWVYPPEK_	P02790	0.603402	0.603402	4.03165e-09	1.26495e-08	142	P02790	HPX	Hemopexin	HEMO_HUMAN	1	51.9295	1.5193	Dengue	QC	NaN	NaN	NaN	98.144	0.0923282
Dengue / QC	_SC[Carbamidomethyl (C)]RPNDVTC[Carbamidomethyl (C)]VFDPVHTISHTVISLPTFR_	P23142	0.820434	0.820434	4.07013e-09	1.27548e-08	142	P23142	FBLN1	Fibulin-1	FBLN1_HUMAN	1	76.5937	1.76594	Dengue	QC	NaN	NaN	NaN	133.095	0.163742
Dengue / QC	_AQTTVTC[Carbamidomethyl (C)]TEK_	Q02985;Q02985-2	1.22384	1.22384	4.17695e-09	1.30591e-08	74	Q02985;Q02985-2	CFHR3	Complement factor H-related protein 3;Isoform 2 of Complement factor H-related protein 3	FHR3_HUMAN	1	133.568	2.33568	Dengue	QC	NaN	NaN	NaN	33.163	0.142209
Dengue / QC	_NAIGGKFPLYNLGFGNNLNYNFLENMALENHGFARR_	Q06033;Q06033-2	2.32724	2.32724	4.19089e-09	1.30818e-08	44	Q06033;Q06033-2	ITIH3	Inter-alpha-trypsin inhibitor heavy chain H3;Isoform 2 of Inter-alpha-trypsin inhibitor heavy chain H3	ITIH3_HUMAN	1	401.845	5.01845	Dengue	QC	NaN	NaN	NaN	28.1957	0.272214
Dengue / QC	_LDVDQALNR_	I3L145;P04278	1.35578	1.35578	4.37241e-09	1.36051e-08	40	I3L145;P04278	SHBG	Sex hormone-binding globulin	I3L145_HUMAN;SHBG_HUMAN	1	155.936	2.55936	Dengue	QC	NaN	NaN	NaN	27.5299	0.288577
Dengue / QC	_SVPSDIFQIQATTIYANTINTFR_	Q12805;Q12805-2;Q12805-4	1.28787	1.28787	4.54932e-09	1.41257e-08	72	Q12805;Q12805-2;Q12805-4	EFEMP1	EGF-containing fibulin-like extracellular matrix protein 1;Isoform 2 of EGF-containing fibulin-like extracellular matrix protein 1;Isoform 4 of EGF-containing fibulin-like extracellular matrix protein 1	FBLN3_HUMAN	1	144.166	2.44166	Dengue	QC	NaN	NaN	NaN	44.8771	0.199505
Dengue / QC	_TLRVQGNDHSATR_	Q14624	1.87862	1.87862	4.64652e-09	1.44047e-08	96	Q14624	ITIH4	Inter-alpha-trypsin inhibitor heavy chain H4	ITIH4_HUMAN	1	267.722	3.67722	Dengue	QC	NaN	NaN	NaN	73.3415	0.28667
Dengue / QC	_KPIWLSQMSC[Carbamidomethyl (C)]SGR_	O43866	-0.417783	0.417783	4.74036e-09	1.46879e-08	174	O43866	CD5L	CD5 antigen-like	CD5L_HUMAN	1	-25.1426	0.748574	Dengue	QC	NaN	NaN	NaN	102.461	0.0673906
Dengue / QC	_TTSAKETQSIEK_	Q92954-3	2.40297	2.40297	4.82729e-09	1.49258e-08	34	Q92954-3	PRG4	Isoform C of Proteoglycan 4	PRG4_HUMAN	1	428.89	5.2889	Dengue	QC	NaN	NaN	NaN	25.8353	0.221006
Dengue / QC	_EQQALQTVC[Carbamidomethyl (C)]LK_	E9PHK0;P05452	0.415136	0.415136	4.83466e-09	1.49407e-08	64	E9PHK0;P05452	CLEC3B	Tetranectin	E9PHK0_HUMAN;TETN_HUMAN	1	33.3424	1.33342	Dengue	QC	NaN	NaN	NaN	31.752	0.112721
Dengue / QC	_IDWDDDKFYSTSLK_	A0A0C4DH43	0.859008	0.859008	4.86924e-09	1.50397e-08	68	A0A0C4DH43	IGHV2-70D	Immunoglobulin heavy variable 2-70D	HV70D_HUMAN	1	81.3791	1.81379	Dengue	QC	NaN	NaN	NaN	55.7474	0.101236
Dengue / QC	_YHFEALADTGISSEFYDNANDLLSK_	P07357	0.902495	0.902495	5.3696e-09	1.64813e-08	112	P07357	C8A	Complement component C8 alpha chain	CO8A_HUMAN	1	86.9296	1.8693	Dengue	QC	NaN	NaN	NaN	63.758	0.12775
Dengue / QC	_KGYTQQLAFR_	P01024	-0.503624	0.503624	5.45556e-09	1.6719e-08	174	P01024	C3	Complement C3	CO3_HUMAN	1	-29.4667	0.705333	Dengue	QC	NaN	NaN	NaN	95.6466	0.080232
Dengue / QC	_NNNEKDMALTAFVLISLQEAK_	P01024	0.940545	0.940545	5.52143e-09	1.69033e-08	140	P01024	C3	Complement C3	CO3_HUMAN	1	91.9253	1.91925	Dengue	QC	NaN	NaN	NaN	108.757	0.157128
Dengue / QC	_YDYC[Carbamidomethyl (C)]DILEC[Carbamidomethyl (C)]EEEC[Carbamidomethyl (C)]MHC[Carbamidomethyl (C)]SGENYDGKISK_	P00747	2.23512	2.23512	5.57981e-09	1.70643e-08	60	P00747	PLG	Plasminogen	PLMN_HUMAN	1	370.802	4.70802	Dengue	QC	NaN	NaN	NaN	46.9193	0.272114
Dengue / QC	_GYQLSDVDGVTC[Carbamidomethyl (C)]EDIDEC[Carbamidomethyl (C)]ALPTGGHIC[Carbamidomethyl (C)]SYR_	P23142	0.917619	0.917619	5.69356e-09	1.73795e-08	134	P23142	FBLN1	Fibulin-1	FBLN1_HUMAN	1	88.8995	1.889	Dengue	QC	NaN	NaN	NaN	90.6885	0.125173
Dengue / QC	_GVSAYLSRPSPFDLFIR_	A0A286YES5;P01854	3.38712	3.38712	5.6947e-09	1.73795e-08	36	A0A286YES5;P01854	IGHE	Immunoglobulin heavy constant epsilon (Fragment);Immunoglobulin heavy constant epsilon	A0A286YES5_HUMAN;IGHE_HUMAN	1	946.223	10.4622	Dengue	QC	NaN	NaN	NaN	24.5739	0.372165
Dengue / QC	_LGNWSAMPSC[Carbamidomethyl (C)]K_	P02749	1.511	1.511	5.72768e-09	1.74711e-08	56	P02749	APOH	Beta-2-glycoprotein 1	APOH_HUMAN	1	185.007	2.85007	Dengue	QC	NaN	NaN	NaN	19.8154	0.139274
Dengue / QC	_TQVNTQAEQLR_	P06727	1.1669	1.1669	5.76206e-09	1.75668e-08	70	P06727	APOA4	Apolipoprotein A-IV	APOA4_HUMAN	1	124.528	2.24528	Dengue	QC	NaN	NaN	NaN	40.9354	0.19845
Dengue / QC	_MGVSWIR_	A0A0B4J1V2	-0.633788	0.633788	5.84382e-09	1.78068e-08	160	A0A0B4J1V2	IGHV2-26	Immunoglobulin heavy variable 2-26	HV226_HUMAN	1	-35.5518	0.644482	Dengue	QC	NaN	NaN	NaN	88.1298	0.0968381
Dengue / QC	_IPLYYPNAGLTR_	P08519	1.19107	1.19107	6.00763e-09	1.82776e-08	88	P08519	LPA	Apolipoprotein(a)	APOA_HUMAN	1	128.321	2.28321	Dengue	QC	NaN	NaN	NaN	69.8145	0.197257
Dengue / QC	_TDELPQLVTLPHPNLHGPEILDVPSTVQK_	P02751;P02751-15;P02751-3;P02751-7	0.891427	0.891427	6.26561e-09	1.9033e-08	54	P02751;P02751-15;P02751-3;P02751-7	FN1	Fibronectin;Isoform 15 of Fibronectin;Isoform 3 of Fibronectin;Isoform 7 of Fibronectin	FINC_HUMAN	1	85.501	1.85501	Dengue	QC	NaN	NaN	NaN	43.714	0.108174
Dengue / QC	_YPLYVLK_	A0A087WSY5;Q96IY4	0.736494	0.736494	6.3553e-09	1.92955e-08	62	A0A087WSY5;Q96IY4	CPB2	Carboxypeptidase B2	A0A087WSY5_HUMAN;CBPB2_HUMAN	1	66.6122	1.66612	Dengue	QC	NaN	NaN	NaN	54.108	0.0971352
Dengue / QC	_LPVSLSEGR_	Q9Y6R7	2.25341	2.25341	6.4414e-09	1.95367e-08	22	Q9Y6R7	FCGBP	IgGFc-binding protein	FCGBP_HUMAN	1	376.809	4.76809	Dengue	QC	NaN	NaN	NaN	14.3346	0.179428
Dengue / QC	_EPQVYTLPPSQEEMTKNQVSLTC[Carbamidomethyl (C)]LVK_	P01861	0.911139	0.911139	6.5693e-09	1.98734e-08	148	P01861	IGHG4	Immunoglobulin heavy constant gamma 4	IGHG4_HUMAN	1	88.053	1.88053	Dengue	QC	NaN	NaN	NaN	129.493	0.122839
Dengue / QC	_SGLSTGWTQLSKLLELTGPKSLPAPWLSMAPVSWITPGLK_	P04217	0.425564	0.425564	6.83421e-09	2.06324e-08	150	P04217	A1BG	Alpha-1B-glycoprotein	A1BG_HUMAN	1	34.3097	1.3431	Dengue	QC	NaN	NaN	NaN	47.6367	0.16496
Dengue / QC	_TILGTMPAFEVSLQALQK_	P04114	1.28149	1.28149	6.86338e-09	2.06992e-08	12	P04114	APOB	Apolipoprotein B-100	APOB_HUMAN	1	143.09	2.4309	Dengue	QC	NaN	NaN	NaN	5.92191	0.113019
Dengue / QC	_C[Carbamidomethyl (C)]QFFTYSLLPEDC[Carbamidomethyl (C)]KEEK_	H0YAC1;P03952	0.667114	0.667114	6.96823e-09	2.09831e-08	144	H0YAC1;P03952	KLKB1	Plasma kallikrein (Fragment);Plasma kallikrein	H0YAC1_HUMAN;KLKB1_HUMAN	1	58.7893	1.58789	Dengue	QC	NaN	NaN	NaN	93.0323	0.085827
Dengue / QC	_SDVVYTDWK_	P02763	-0.497184	0.497184	7.00645e-09	2.10874e-08	176	P02763	ORM1	Alpha-1-acid glycoprotein 1	A1AG1_HUMAN	1	-29.1512	0.708488	Dengue	QC	NaN	NaN	NaN	74.4183	0.0784317
Dengue / QC	_LLLLDLSHNSLLALEPGILDTANVEALR_	Q6EMK4	1.28509	1.28509	7.31523e-09	2.19159e-08	66	Q6EMK4	VASN	Vasorin	VASN_HUMAN	1	143.697	2.43697	Dengue	QC	NaN	NaN	NaN	34.3663	0.15615
Dengue / QC	_AEGLEC[Carbamidomethyl (C)]TK_	P04275	2.38621	2.38621	7.63379e-09	2.28354e-08	28	P04275	VWF	von Willebrand factor	VWF_HUMAN	1	422.782	5.22782	Dengue	QC	NaN	NaN	NaN	21.7585	0.288748
Dengue / QC	_LLIYDASSR_	A0A0C4DH25	-1.19504	1.19504	7.74942e-09	2.31695e-08	176	A0A0C4DH25	IGKV3D-20	Immunoglobulin kappa variable 3D-20	KVD20_HUMAN	1	-56.3225	0.436775	Dengue	QC	NaN	NaN	NaN	60.0618	0.179875
Dengue / QC	_AQVSPTASDMLHMR_	Q6UXB8	0.849145	0.849145	7.79026e-09	2.32798e-08	54	Q6UXB8	PI16	Peptidase inhibitor 16	PI16_HUMAN	1	80.1433	1.80143	Dengue	QC	NaN	NaN	NaN	47.3043	0.13102
Dengue / QC	_HLVC[Carbamidomethyl (C)]NGDQDC[Carbamidomethyl (C)]LDGSDEDDC[Carbamidomethyl (C)]EDVR_	P07357	0.614189	0.614189	8.07671e-09	2.40991e-08	56	P07357	C8A	Complement component C8 alpha chain	CO8A_HUMAN	1	53.0697	1.5307	Dengue	QC	NaN	NaN	NaN	35.9929	0.0904603
Dengue / QC	_NIETIINTFHQYSVK_	P06702	2.78327	2.78327	8.2671e-09	2.46422e-08	64	P06702	S100A9	Protein S100-A9	S10A9_HUMAN	1	588.409	6.88409	Dengue	QC	NaN	NaN	NaN	45.1587	0.228665
Dengue / QC	_FGM[Oxidation (M)]HFC[Carbamidomethyl (C)]GGTLISPEWVLTAAHC[Carbamidomethyl (C)]LEK_	P00747	0.300909	0.300909	8.48588e-09	2.52559e-08	66	P00747	PLG	Plasminogen	PLMN_HUMAN	1	23.192	1.23192	Dengue	QC	NaN	NaN	NaN	54.7242	0.199859
Dengue / QC	_VGYVSGWGRNANFK_	P00738	1.06436	1.06436	8.52515e-09	2.536e-08	52	P00738	HP	Haptoglobin	HPT_HUMAN	1	109.124	2.09124	Dengue	QC	NaN	NaN	NaN	39.783	0.141366
Dengue / QC	_DSGVPDRFSGSGSGTDFTLK_	P06310	-0.462515	0.462515	8.62151e-09	2.56207e-08	176	P06310	IGKV2-30	Immunoglobulin kappa variable 2-30	KV230_HUMAN	1	-27.428	0.72572	Dengue	QC	NaN	NaN	NaN	101.358	0.0699477
Dengue / QC	_LFLEPTQADIALLK_	P08519	1.08332	1.08332	8.88461e-09	2.63759e-08	116	P08519	LPA	Apolipoprotein(a)	APOA_HUMAN	1	111.891	2.11891	Dengue	QC	NaN	NaN	NaN	92.0817	0.117472
Dengue / QC	_C[Carbamidomethyl (C)]QIAGWGHLDENVSGYSSSLR_	Q04756	0.558282	0.558282	9.03006e-09	2.67807e-08	102	Q04756	HGFAC	Hepatocyte growth factor activator	HGFA_HUMAN	1	47.2515	1.47251	Dengue	QC	NaN	NaN	NaN	73.4539	0.0756326
Dengue / QC	_LTGSC[Carbamidomethyl (C)]SYVLFQNK_	P04275	0.868631	0.868631	9.07651e-09	2.69049e-08	68	P04275	VWF	von Willebrand factor	VWF_HUMAN	1	82.593	1.82593	Dengue	QC	NaN	NaN	NaN	51.2529	0.164352
Dengue / QC	_VTASSPVAVLSGHSC[Carbamidomethyl (C)]AQK_	Q9Y6R7	1.41246	1.41246	9.33405e-09	2.75849e-08	62	Q9Y6R7	FCGBP	IgGFc-binding protein	FCGBP_HUMAN	1	166.19	2.6619	Dengue	QC	NaN	NaN	NaN	48.329	0.208243
Dengue / QC	_VSNKALPAPIEK_	P01857	2.45145	2.45145	9.34615e-09	2.76068e-08	172	P01857	IGHG1	Immunoglobulin heavy constant gamma 1	IGHG1_HUMAN	1	446.964	5.46964	Dengue	QC	NaN	NaN	NaN	144.683	0.378983
Dengue / QC	_RLPFIC[Carbamidomethyl (C)]SY_	P13727	3.00378	3.00378	9.44677e-09	2.789e-08	32	P13727	PRG2	Bone marrow proteoglycan	PRG2_HUMAN	1	702.1	8.021	Dengue	QC	NaN	NaN	NaN	19.6474	0.336326
Dengue / QC	_LYLQMSTHGK_	A0A0C4DFP6;Q9NQ79;Q9NQ79-2	0.824657	0.824657	9.52434e-09	2.80768e-08	48	A0A0C4DFP6;Q9NQ79;Q9NQ79-2	CRTAC1	Cartilage acidic protein 1;Cartilage acidic protein 1;Isoform 2 of Cartilage acidic protein 1	A0A0C4DFP6_HUMAN;CRAC1_HUMAN;CRAC1_HUMAN	1	77.1114	1.77111	Dengue	QC	NaN	NaN	NaN	38.8887	0.103403
Dengue / QC	_TLMFGSYLDDEKNWGLSFYADKPETTK_	P19652	0.486508	0.486508	9.5717e-09	2.8174e-08	162	P19652	ORM2	Alpha-1-acid glycoprotein 2	A1AG2_HUMAN	1	40.105	1.40105	Dengue	QC	NaN	NaN	NaN	133.204	0.0817801
Dengue / QC	_FQVDNNNR_	P01023	-0.517722	0.517722	9.72766e-09	2.86045e-08	172	P01023	A2M	Alpha-2-macroglobulin	A2MG_HUMAN	1	-30.1526	0.698474	Dengue	QC	NaN	NaN	NaN	101.119	0.0849998
Dengue / QC	_SLFTDLVAEK_	P20742	3.2634	3.2634	9.80639e-09	2.87928e-08	44	P20742	PZP	Pregnancy zone protein	PZP_HUMAN	1	860.243	9.60243	Dengue	QC	NaN	NaN	NaN	35.6736	0.478426
Dengue / QC	_NTFAEVTGLSPGVTYYFKVFAVSHGR_	P02751;P02751-15;P02751-3;P02751-7	0.843983	0.843983	9.84879e-09	2.88839e-08	76	P02751;P02751-15;P02751-3;P02751-7	FN1	Fibronectin;Isoform 15 of Fibronectin;Isoform 3 of Fibronectin;Isoform 7 of Fibronectin	FINC_HUMAN	1	79.4999	1.795	Dengue	QC	NaN	NaN	NaN	19.3759	0.098577
Dengue / QC	_FRVVSVDENFRPR_	P20742	2.17232	2.17232	9.89826e-09	2.89758e-08	96	P20742	PZP	Pregnancy zone protein	PZP_HUMAN	1	350.747	4.50747	Dengue	QC	NaN	NaN	NaN	70.5018	0.32706
Dengue / QC	_DVYKAGEQVTYTC[Carbamidomethyl (C)]ATYYK_	P08603	0.735499	0.735499	1.00426e-08	2.93547e-08	84	P08603	CFH	Complement factor H	CFAH_HUMAN	1	66.4973	1.66497	Dengue	QC	NaN	NaN	NaN	70.5567	0.115823
Dengue / QC	_EVKIDGQFR_	P04114	1.0444	1.0444	1.00699e-08	2.94198e-08	30	P04114	APOB	Apolipoprotein B-100	APOB_HUMAN	1	106.251	2.06251	Dengue	QC	NaN	NaN	NaN	17.7108	0.219422
Dengue / QC	_ELRYDSTC[Carbamidomethyl (C)]ER_	P07357	2.33474	2.33474	1.02562e-08	2.99194e-08	38	P07357	C8A	Complement component C8 alpha chain	CO8A_HUMAN	1	404.46	5.0446	Dengue	QC	NaN	NaN	NaN	31.1818	0.287918
Dengue / QC	_LQDAEIAR_	P06703;R4GN98	1.1396	1.1396	1.04409e-08	3.03828e-08	32	P06703;R4GN98	S100A6	Protein S100-A6;Protein S100 (Fragment)	S10A6_HUMAN;R4GN98_HUMAN	1	120.319	2.20319	Dengue	QC	NaN	NaN	NaN	24.1989	0.1231
Dengue / QC	_ALWEKPFISSR_	P29622	0.407054	0.407054	1.05315e-08	3.05861e-08	98	P29622	SERPINA4	Kallistatin	KAIN_HUMAN	1	32.5975	1.32598	Dengue	QC	NaN	NaN	NaN	60.1598	0.0808008
Dengue / QC	_C[Carbamidomethyl (C)]PEALFQPSFLGM[Oxidation (M)]ESC[Carbamidomethyl (C)]GIHETTFNSIM[Oxidation (M)]K_	P60709	-2.11406	2.11406	1.0892e-08	3.15553e-08	14	P60709	ACTB	Actin, cytoplasmic 1	ACTB_HUMAN	1	-76.9004	0.230996	Dengue	QC	NaN	NaN	NaN	8.06674	0.40589
Dengue / QC	_TFPGFFSPM[Oxidation (M)]LGEFVSETESR_	P02671	2.61104	2.61104	1.09841e-08	3.1797e-08	166	P02671	FGA	Fibrinogen alpha chain	FIBA_HUMAN	1	510.944	6.10944	Dengue	QC	NaN	NaN	NaN	122.984	0.341233
Dengue / QC	_TEDTALYYC[Carbamidomethyl (C)]AK_	A0A0B4J1X8	-0.495873	0.495873	1.12188e-08	3.24063e-08	176	A0A0B4J1X8	IGHV3-43	Immunoglobulin heavy variable 3-43	HV343_HUMAN	1	-29.0868	0.709132	Dengue	QC	NaN	NaN	NaN	92.7595	0.090462
Dengue / QC	_SNFLNC[Carbamidomethyl (C)]YVSGFHPSDIEVDLLK_	P61769	0.993363	0.993363	1.12934e-08	3.25898e-08	118	P61769	B2M	Beta-2-microglobulin	B2MG_HUMAN	1	99.0821	1.99082	Dengue	QC	NaN	NaN	NaN	90.546	0.162854
Dengue / QC	_AFWLDVSHNRLEALPNSLLAPLGR_	P35858;P35858-2	1.24242	1.24242	1.14237e-08	3.29172e-08	48	P35858;P35858-2	IGFALS	Insulin-like growth factor-binding protein complex acid labile subunit;Isoform 2 of Insulin-like growth factor-binding protein complex acid labile subunit	ALS_HUMAN	1	136.595	2.36595	Dengue	QC	NaN	NaN	NaN	41.9784	0.149457
Dengue / QC	_VLAPATFYAIC[Carbamidomethyl (C)]QQDSC[Carbamidomethyl (C)]HQEQVC[Carbamidomethyl (C)]EVIASYAHLC[Carbamidomethyl (C)]R_	P04275	1.39518	1.39518	1.1538e-08	3.31979e-08	68	P04275	VWF	von Willebrand factor	VWF_HUMAN	1	163.022	2.63022	Dengue	QC	NaN	NaN	NaN	57.7108	0.171832
Dengue / QC	_QLNYKHYDGSYSTFGER_	P01023	2.17595	2.17595	1.15797e-08	3.33016e-08	108	P01023	A2M	Alpha-2-macroglobulin	A2MG_HUMAN	1	351.883	4.51883	Dengue	QC	NaN	NaN	NaN	85.7231	0.318777
Dengue / QC	_C[Carbamidomethyl (C)]LPTAC[Carbamidomethyl (C)]TIQLR_	P04275	1.02029	1.02029	1.19493e-08	3.43308e-08	48	P04275	VWF	von Willebrand factor	VWF_HUMAN	1	102.833	2.02833	Dengue	QC	NaN	NaN	NaN	38.3716	0.164154
Dengue / QC	_AHYGGFTVQNEANKYQISVNK_	P02675	2.38762	2.38762	1.20655e-08	3.45984e-08	132	P02675	FGB	Fibrinogen beta chain	FIBB_HUMAN	1	423.292	5.23292	Dengue	QC	NaN	NaN	NaN	109.619	0.331703
Dengue / QC	_SQDILLSVENTVIYR_	P07225	0.762714	0.762714	1.20874e-08	3.4643e-08	108	P07225	PROS1	Vitamin K-dependent protein S	PROS_HUMAN	1	69.668	1.69668	Dengue	QC	NaN	NaN	NaN	73.6278	0.118954
Dengue / QC	_GKC[Carbamidomethyl (C)]VLFPYGGC[Carbamidomethyl (C)]QGNGNK_	P02760	0.634134	0.634134	1.24015e-08	3.54221e-08	48	P02760	AMBP	Protein AMBP	AMBP_HUMAN	1	55.2006	1.55201	Dengue	QC	NaN	NaN	NaN	39.1457	0.103755
Dengue / QC	_AGFEWNEDGAGTTPSPGLQPAHLTFPLDYHLNQPFIFVLR_	P36955	0.7051	0.7051	1.24064e-08	3.54221e-08	82	P36955	SERPINF1	Pigment epithelium-derived factor	PEDF_HUMAN	1	63.0257	1.63026	Dengue	QC	NaN	NaN	NaN	66.0752	0.133052
Dengue / QC	_DASGVTFTWTPSSGKSAVQGPPER_	P01876	1.8815	1.8815	1.24084e-08	3.54221e-08	44	P01876	IGHA1	Immunoglobulin heavy constant alpha 1	IGHA1_HUMAN	1	268.458	3.68458	Dengue	QC	NaN	NaN	NaN	33.192	0.274768
Dengue / QC	_QVPAHARDFHINLFQVLPWLK_	B4E1Z4	0.956986	0.956986	1.27902e-08	3.63738e-08	30	B4E1Z4	NaN	cDNA FLJ55673, highly similar to Complement factor B (EC 3.4.21.47)	B4E1Z4_HUMAN	1	94.125	1.94125	Dengue	QC	NaN	NaN	NaN	15.9611	0.145091
Dengue / QC	_SIAAATSALVK_	Q9Y490	1.1281	1.1281	1.30502e-08	3.70597e-08	28	Q9Y490	TLN1	Talin-1	TLN1_HUMAN	1	118.57	2.1857	Dengue	QC	NaN	NaN	NaN	21.1483	0.154753
Dengue / QC	_EDFTSLSLVLYSR_	P02774;P02774-3	0.607606	0.607606	1.31595e-08	3.73338e-08	138	P02774;P02774-3	GC	Vitamin D-binding protein;Isoform 3 of Vitamin D-binding protein	VTDB_HUMAN	1	52.3728	1.52373	Dengue	QC	NaN	NaN	NaN	105.347	0.104091
Dengue / QC	_GHFSISIPVKSDIAPVARLLIYAVLPTGDVIGDSAK_	P01023	2.50545	2.50545	1.32532e-08	3.75454e-08	74	P01023	A2M	Alpha-2-macroglobulin	A2MG_HUMAN	1	467.828	5.67828	Dengue	QC	NaN	NaN	NaN	45.3516	0.247156
Dengue / QC	_SSSYSKQFTSSTSYNRGDSTFESK_	P02671	1.28869	1.28869	1.34092e-08	3.7969e-08	118	P02671	FGA	Fibrinogen alpha chain	FIBA_HUMAN	1	144.307	2.44307	Dengue	QC	NaN	NaN	NaN	64.7936	0.302663
Dengue / QC	_YKPFSQVPTGEVFYYSC[Carbamidomethyl (C)]EYNFVSPSK_	Q03591	0.628188	0.628188	1.37662e-08	3.89236e-08	114	Q03591	CFHR1	Complement factor H-related protein 1	FHR1_HUMAN	1	54.5622	1.54562	Dengue	QC	NaN	NaN	NaN	96.0977	0.102325
Dengue / QC	_YELDKAFSDRNTLIIYLDK_	P01024	0.78568	0.78568	1.45081e-08	4.08706e-08	62	P01024	C3	Complement C3	CO3_HUMAN	1	72.3905	1.72391	Dengue	QC	NaN	NaN	NaN	23.9014	0.108185
Dengue / QC	_VTSTLTIK_	P01871	-0.537698	0.537698	1.45212e-08	4.08817e-08	176	P01871	IGHM	Immunoglobulin heavy constant mu	IGHM_HUMAN	1	-31.1131	0.688869	Dengue	QC	NaN	NaN	NaN	78.89	0.0872952
Dengue / QC	_NPDAEISPWC[Carbamidomethyl (C)]YTMDPNVR_	P08519	1.30341	1.30341	1.4645e-08	4.12061e-08	42	P08519	LPA	Apolipoprotein(a)	APOA_HUMAN	1	146.811	2.46811	Dengue	QC	NaN	NaN	NaN	25.0529	0.178873
Dengue / QC	_GLFIIDGK_	P32119	0.320359	0.320359	1.47161e-08	4.1371e-08	120	P32119	PRDX2	Peroxiredoxin-2	PRDX2_HUMAN	1	24.8641	1.24864	Dengue	QC	NaN	NaN	NaN	112.152	0.0611836
Dengue / QC	_FATTFYQHLADSKNDNDNIFLSPLSISTAFAMTK_	P01008	0.777196	0.777196	1.48911e-08	4.1823e-08	114	P01008	SERPINC1	Antithrombin-III	ANT3_HUMAN	1	71.3796	1.7138	Dengue	QC	NaN	NaN	NaN	76.457	0.132613
Dengue / QC	_VEPYGENFNK_	P06727	1.09526	1.09526	1.49417e-08	4.19451e-08	30	P06727	APOA4	Apolipoprotein A-IV	APOA4_HUMAN	1	113.652	2.13652	Dengue	QC	NaN	NaN	NaN	21.1987	0.169688
Dengue / QC	_GM[Oxidation (M)]C[Carbamidomethyl (C)]TSPPLIK_	P05160	0.359288	0.359288	1.49939e-08	4.20716e-08	34	P05160	F13B	Coagulation factor XIII B chain	F13B_HUMAN	1	28.2792	1.28279	Dengue	QC	NaN	NaN	NaN	14.4435	0.62993
Dengue / QC	_DLFHC[Carbamidomethyl (C)]VSFTLPR_	P20742	3.06089	3.06089	1.53737e-08	4.30552e-08	38	P20742	PZP	Pregnancy zone protein	PZP_HUMAN	1	734.486	8.34486	Dengue	QC	NaN	NaN	NaN	30.0736	0.430253
Dengue / QC	_FKDLGEENFKALVLIAFAQYLQQC[Carbamidomethyl (C)]PFEDHVK_	P02768	0.703675	0.703675	1.54735e-08	4.3314e-08	176	P02768	ALB	Serum albumin	ALBU_HUMAN	1	62.8648	1.62865	Dengue	QC	NaN	NaN	NaN	141.138	0.090449
Dengue / QC	_LLIYDASNR_	P04433	-0.690233	0.690233	1.59488e-08	4.44752e-08	176	P04433	IGKV3-11	Immunoglobulin kappa variable 3-11	KV311_HUMAN	1	-38.0246	0.619754	Dengue	QC	NaN	NaN	NaN	47.837	0.102422
Dengue / QC	_DDWFMLGLR_	I3L145;P04278	0.836515	0.836515	1.60592e-08	4.47196e-08	66	I3L145;P04278	SHBG	Sex hormone-binding globulin	I3L145_HUMAN;SHBG_HUMAN	1	78.5732	1.78573	Dengue	QC	NaN	NaN	NaN	34.545	0.235024
Dengue / QC	_AHVDALR_	P02647	0.615499	0.615499	1.61055e-08	4.48271e-08	152	P02647	APOA1	Apolipoprotein A-I	APOA1_HUMAN	1	53.2088	1.53209	Dengue	QC	NaN	NaN	NaN	107.7	0.106326
Dengue / QC	_VPQVSTPTLVEVSRNLGK_	P02768	3.88652	3.88652	1.63522e-08	4.5459e-08	68	P02768	ALB	Serum albumin	ALBU_HUMAN	1	1378.97	14.7897	Dengue	QC	NaN	NaN	NaN	45.6762	0.540179
Dengue / QC	_KFIC[Carbamidomethyl (C)]PLTGLWPINTLKC[Carbamidomethyl (C)]TPR_	P02749	5.15651	5.15651	1.64254e-08	4.56098e-08	26	P02749	APOH	Beta-2-glycoprotein 1	APOH_HUMAN	1	3466.68	35.6668	Dengue	QC	NaN	NaN	NaN	15.0989	0.385682
Dengue / QC	_C[Carbamidomethyl (C)]LLFSFLPASSINDMEKR_	H0YAC1;P03952	0.57829	0.57829	1.68391e-08	4.66483e-08	130	H0YAC1;P03952	KLKB1	Plasma kallikrein (Fragment);Plasma kallikrein	H0YAC1_HUMAN;KLKB1_HUMAN	1	49.3078	1.49308	Dengue	QC	NaN	NaN	NaN	79.1284	0.102914
Dengue / QC	_SDVMYTDWK_	P19652	-0.392972	0.392972	1.76637e-08	4.8756e-08	176	P19652	ORM2	Alpha-1-acid glycoprotein 2	A1AG2_HUMAN	1	-23.8441	0.761559	Dengue	QC	NaN	NaN	NaN	87.5432	0.0608209
Dengue / QC	_LGPNYLHIPVNC[Carbamidomethyl (C)]PYR_	P04040	1.36128	1.36128	1.84202e-08	5.06707e-08	54	P04040	CAT	Catalase	CATA_HUMAN	1	156.912	2.56912	Dengue	QC	NaN	NaN	NaN	32.2096	0.162582
Dengue / QC	_NKPGVYTDVAYYLAWIREHTVS_	P00748	1.4012	1.4012	1.84458e-08	5.07174e-08	94	P00748	F12	Coagulation factor XII	FA12_HUMAN	1	164.122	2.64122	Dengue	QC	NaN	NaN	NaN	75.0379	0.213107
Dengue / QC	_ALVQQMEQLR_	P06727	0.645787	0.645787	1.84674e-08	5.07531e-08	116	P06727	APOA4	Apolipoprotein A-IV	APOA4_HUMAN	1	56.4593	1.56459	Dengue	QC	NaN	NaN	NaN	98.8593	0.121526
Dengue / QC	_AEDM[Oxidation (M)]AVYYC[Carbamidomethyl (C)]TR_	A0A075B7E8	1.0015	1.0015	1.92112e-08	5.26497e-08	132	A0A075B7E8	IGHV3OR16-13	Immunoglobulin heavy variable 3/OR16-13 (non-functional) (Fragment)	A0A075B7E8_HUMAN	1	100.209	2.00209	Dengue	QC	NaN	NaN	NaN	75.9673	0.277134
Dengue / QC	_NTLYLQM[Oxidation (M)]NSLR_	A0A0J9YVT0;P0DP02	-0.604011	0.604011	1.95673e-08	5.36006e-08	164	A0A0J9YVT0;P0DP02	IGHV3-33;IGHV3-30-3	Immunoglobulin heavy variable 3-33 (Fragment);Immunoglobulin heavy variable 3-30-3	A0A0J9YVT0_HUMAN;HVC33_HUMAN	1	-34.2078	0.657922	Dengue	QC	NaN	NaN	NaN	62.3007	0.103134
Dengue / QC	_EC[Carbamidomethyl (C)]EEIIR_	P02675	2.46031	2.46031	2.01465e-08	5.50334e-08	116	P02675	FGB	Fibrinogen beta chain	FIBB_HUMAN	1	450.336	5.50336	Dengue	QC	NaN	NaN	NaN	96.66	0.374462
Dengue / QC	_GAQTLYVPNC[Carbamidomethyl (C)]DHR_	F8VYK9;P24592	1.47853	1.47853	2.0244e-08	5.51972e-08	16	F8VYK9;P24592	IGFBP6	Insulin-like growth factor-binding protein 6	F8VYK9_HUMAN;IBP6_HUMAN	1	178.665	2.78665	Dengue	QC	NaN	NaN	NaN	8.36056	0.406583
Dengue / QC	_EFQLFSSPHGK_	P02787	-0.376552	0.376552	2.05821e-08	5.60672e-08	176	P02787	TF	Serotransferrin	TRFE_HUMAN	1	-22.9724	0.770276	Dengue	QC	NaN	NaN	NaN	105.69	0.0659267
Dengue / QC	_GPTQDFR_	P20742	3.64239	3.64239	2.0855e-08	5.6758e-08	32	P20742	PZP	Pregnancy zone protein	PZP_HUMAN	1	1148.73	12.4873	Dengue	QC	NaN	NaN	NaN	23.4521	0.479693
Dengue / QC	_SPYIDKITHYNYLILSK_	P01031	0.611999	0.611999	2.09107e-08	5.68571e-08	70	P01031	C5	Complement C5	CO5_HUMAN	1	52.8375	1.52838	Dengue	QC	NaN	NaN	NaN	64.7117	0.0955931
Dengue / QC	_ALRLPPTTTC[Carbamidomethyl (C)]QQQKEELLPAQDIK_	B4E1Z4	0.648062	0.648062	2.11127e-08	5.7274e-08	174	B4E1Z4	NaN	cDNA FLJ55673, highly similar to Complement factor B (EC 3.4.21.47)	B4E1Z4_HUMAN	1	56.7061	1.56706	Dengue	QC	NaN	NaN	NaN	151.648	0.111112
Dengue / QC	_NELIPLIYLENPR_	P20742	2.16013	2.16013	2.13685e-08	5.7896e-08	54	P20742	PZP	Pregnancy zone protein	PZP_HUMAN	1	346.955	4.46955	Dengue	QC	NaN	NaN	NaN	40.1119	0.411357
Dengue / QC	_TLVLLMGK_	P07737	1.05826	1.05826	2.15509e-08	5.83283e-08	46	P07737	PFN1	Profilin-1	PROF1_HUMAN	1	108.241	2.08241	Dengue	QC	NaN	NaN	NaN	32.03	0.16605
Dengue / QC	_YAATSQVLLPSK_	P01871	-0.531066	0.531066	2.16978e-08	5.86718e-08	168	P01871	IGHM	Immunoglobulin heavy constant mu	IGHM_HUMAN	1	-30.7957	0.692043	Dengue	QC	NaN	NaN	NaN	135.409	0.0863547
Dengue / QC	_LSC[Carbamidomethyl (C)]AASGFTFDDYAM[Oxidation (M)]HWVR_	P01782	0.713148	0.713148	2.1821e-08	5.89508e-08	106	P01782	IGHV3-9	Immunoglobulin heavy variable 3-9	HV309_HUMAN	1	63.9377	1.63938	Dengue	QC	NaN	NaN	NaN	84.6099	0.128969
Dengue / QC	_TETITGFQVDAVPANGQTPIQR_	P02751;P02751-15;P02751-3;P02751-7	0.663427	0.663427	2.23996e-08	6.03753e-08	42	P02751;P02751-15;P02751-3;P02751-7	FN1	Fibronectin;Isoform 15 of Fibronectin;Isoform 3 of Fibronectin;Isoform 7 of Fibronectin	FINC_HUMAN	1	58.384	1.58384	Dengue	QC	NaN	NaN	NaN	13.6288	0.182473
Dengue / QC	_VLNYVDWIKKEMEEED_	B4DPQ0	0.841651	0.841651	2.41191e-08	6.48317e-08	88	B4DPQ0	C1R	Complement C1r subcomponent	B4DPQ0_HUMAN	1	79.21	1.7921	Dengue	QC	NaN	NaN	NaN	38.6661	0.0958298
Dengue / QC	_LPLVPALDGC[Carbamidomethyl (C)]LR_	I3L145;P04278	1.71036	1.71036	2.45433e-08	6.59419e-08	32	I3L145;P04278	SHBG	Sex hormone-binding globulin	I3L145_HUMAN;SHBG_HUMAN	1	227.243	3.27243	Dengue	QC	NaN	NaN	NaN	18.432	0.29225
Dengue / QC	_FSC[Carbamidomethyl (C)]MC[Carbamidomethyl (C)]PQGYQVVR_	Q12805;Q12805-2;Q12805-4	1.08379	1.08379	2.46558e-08	6.6214e-08	82	Q12805;Q12805-2;Q12805-4	EFEMP1	EGF-containing fibulin-like extracellular matrix protein 1;Isoform 2 of EGF-containing fibulin-like extracellular matrix protein 1;Isoform 4 of EGF-containing fibulin-like extracellular matrix protein 1	FBLN3_HUMAN	1	111.96	2.1196	Dengue	QC	NaN	NaN	NaN	54.5192	0.16787
Dengue / QC	_VNRNNLELSTPLKIETISHEDLQR_	P07225	0.691035	0.691035	2.47196e-08	6.63551e-08	100	P07225	PROS1	Vitamin K-dependent protein S	PROS_HUMAN	1	61.4441	1.61444	Dengue	QC	NaN	NaN	NaN	66.7261	0.108466
Dengue / QC	_VGVETTKPSK_	A0M8Q6	1.10238	1.10238	2.48474e-08	6.66068e-08	116	A0M8Q6	IGLC7	Immunoglobulin lambda constant 7	IGLC7_HUMAN	1	114.708	2.14708	Dengue	QC	NaN	NaN	NaN	71.6582	0.243076
Dengue / QC	_MAESGYDIALLK_	P03951	1.56286	1.56286	2.49239e-08	6.67207e-08	40	P03951	F11	Coagulation factor XI	FA11_HUMAN	1	195.439	2.95439	Dengue	QC	NaN	NaN	NaN	22.5416	0.198207
Dengue / QC	_DSMIWDC[Carbamidomethyl (C)]TC[Carbamidomethyl (C)]IGAGR_	P02751;P02751-15;P02751-3;P02751-7	0.711828	0.711828	2.50064e-08	6.69113e-08	156	P02751;P02751-15;P02751-3;P02751-7	FN1	Fibronectin;Isoform 15 of Fibronectin;Isoform 3 of Fibronectin;Isoform 7 of Fibronectin	FINC_HUMAN	1	63.7878	1.63788	Dengue	QC	NaN	NaN	NaN	141.905	0.113317
Dengue / QC	_QGENGQMMSC[Carbamidomethyl (C)]TC[Carbamidomethyl (C)]LGNGKGEFK_	P02751;P02751-15;P02751-3;P02751-7	1.21354	1.21354	2.52021e-08	6.74041e-08	44	P02751;P02751-15;P02751-3;P02751-7	FN1	Fibronectin;Isoform 15 of Fibronectin;Isoform 3 of Fibronectin;Isoform 7 of Fibronectin	FINC_HUMAN	1	131.907	2.31907	Dengue	QC	NaN	NaN	NaN	21.9872	0.143061
Dengue / QC	_ITINPDTSKNQFSLQLNSVTPEDTAVYYC[Carbamidomethyl (C)]AR_	A0A0B4J1U7	0.60594	0.60594	2.56921e-08	6.86522e-08	36	A0A0B4J1U7	IGHV6-1	Immunoglobulin heavy variable 6-1	HV601_HUMAN	1	52.197	1.52197	Dengue	QC	NaN	NaN	NaN	27.3191	0.256147
Dengue / QC	_IVEGSDAEIGMSPWQVMLFR_	P00734	0.537634	0.537634	2.62281e-08	7.00527e-08	174	P00734	F2	Prothrombin	THRB_HUMAN	1	45.159	1.45159	Dengue	QC	NaN	NaN	NaN	115.974	0.082007
Dengue / QC	_NSLFEYQK_	P02671	1.64135	1.64135	2.62826e-08	7.0162e-08	108	P02671	FGA	Fibrinogen alpha chain	FIBA_HUMAN	1	211.957	3.11957	Dengue	QC	NaN	NaN	NaN	86.6121	0.22911
Dengue / QC	_TIVTTLQDSIR_	P07996	0.467435	0.467435	2.71013e-08	7.20903e-08	94	P07996	THBS1	Thrombospondin-1	TSP1_HUMAN	1	38.2649	1.38265	Dengue	QC	NaN	NaN	NaN	83.5802	0.0950922
Dengue / QC	_MLEEIMKYEASILTHDSSIR_	P02679;P02679-2	3.48724	3.48724	2.81051e-08	7.45585e-08	50	P02679;P02679-2	FGG	Fibrinogen gamma chain;Isoform Gamma-A of Fibrinogen gamma chain	FIBG_HUMAN	1	1021.4	11.214	Dengue	QC	NaN	NaN	NaN	31.0054	0.580938
Dengue / QC	_FSGSGSGTDFTLTISSLEPEDFAVYYC[Carbamidomethyl (C)]QQR_	P04433	1.53737	1.53737	2.89543e-08	7.66038e-08	42	P04433	IGKV3-11	Immunoglobulin kappa variable 3-11	KV311_HUMAN	1	190.266	2.90266	Dengue	QC	NaN	NaN	NaN	25.1973	0.169615
Dengue / QC	_AAFTEC[Carbamidomethyl (C)]C[Carbamidomethyl (C)]QAADKAAC[Carbamidomethyl (C)]LLPK_	P02768	0.686418	0.686418	2.98155e-08	7.87406e-08	176	P02768	ALB	Serum albumin	ALBU_HUMAN	1	60.9282	1.60928	Dengue	QC	NaN	NaN	NaN	89.4652	0.120028
Dengue / QC	_LAKTYETTLEKC[Carbamidomethyl (C)]C[Carbamidomethyl (C)]AAADPHEC[Carbamidomethyl (C)]YAK_	P02768	1.91982	1.91982	3.02903e-08	7.98155e-08	154	P02768	ALB	Serum albumin	ALBU_HUMAN	1	278.377	3.78377	Dengue	QC	NaN	NaN	NaN	121.888	0.320908
Dengue / QC	_DSPIQC[Carbamidomethyl (C)]IQAIAENR_	E7ER44;P02788	1.67135	1.67135	3.12939e-08	8.22758e-08	48	E7ER44;P02788	LTF	Lactotransferrin	E7ER44_HUMAN;TRFL_HUMAN	1	218.513	3.18513	Dengue	QC	NaN	NaN	NaN	31.8137	0.242761
Dengue / QC	_STGSWSTLKTQDQK_	B4E1Z4	1.84805	1.84805	3.21896e-08	8.44421e-08	150	B4E1Z4	NaN	cDNA FLJ55673, highly similar to Complement factor B (EC 3.4.21.47)	B4E1Z4_HUMAN	1	260.012	3.60012	Dengue	QC	NaN	NaN	NaN	116.202	0.296751
Dengue / QC	_DQYKVGEVLK_	P08603	0.930361	0.930361	3.31619e-08	8.67991e-08	128	P08603	CFH	Complement factor H	CFAH_HUMAN	1	90.5753	1.90575	Dengue	QC	NaN	NaN	NaN	75.374	0.117366
Dengue / QC	_YVTC[Carbamidomethyl (C)]SNGDWSEPPR_	Q92496;Q92496-2	0.580202	0.580202	3.3575e-08	8.78024e-08	58	Q92496;Q92496-2	CFHR4	Complement factor H-related protein 4;Isoform 2 of Complement factor H-related protein 4	FHR4_HUMAN	1	49.5058	1.49506	Dengue	QC	NaN	NaN	NaN	24.0863	0.14447
Dengue / QC	_SITLFVQEDR_	P07996	0.576701	0.576701	3.36907e-08	8.80657e-08	94	P07996	THBS1	Thrombospondin-1	TSP1_HUMAN	1	49.1435	1.49144	Dengue	QC	NaN	NaN	NaN	87.8705	0.0888316
Dengue / QC	_GLESQTK_	P0C0L5	0.966848	0.966848	3.50273e-08	9.11949e-08	128	P0C0L5	C4B	Complement C4-B	CO4B_HUMAN	1	95.4565	1.95457	Dengue	QC	NaN	NaN	NaN	86.3736	0.163056
Dengue / QC	_VYTLNNEK_	H0Y300	1.96921	1.96921	3.54441e-08	9.21986e-08	22	H0Y300	HP	Haptoglobin	H0Y300_HUMAN	1	291.553	3.91553	Dengue	QC	NaN	NaN	NaN	14.4123	0.18098
Dengue / QC	_VKENFDKAR_	P02753;Q5VY30	2.41167	2.41167	3.55823e-08	9.25171e-08	80	P02753;Q5VY30	RBP4	Retinol-binding protein 4;Retinol binding protein 4, plasma, isoform CRA_b	RET4_HUMAN;Q5VY30_HUMAN	1	432.089	5.32089	Dengue	QC	NaN	NaN	NaN	67.7329	0.34327
Dengue / QC	_LATALQKLEEAEKAADESER_	P67936	0.720183	0.720183	3.5623e-08	9.2582e-08	34	P67936	TPM4	Tropomyosin alpha-4 chain	TPM4_HUMAN	1	64.7391	1.64739	Dengue	QC	NaN	NaN	NaN	23.8112	0.146179
Dengue / QC	_EFNPLVIVGLSK_	A0A0A0MRJ7;P12259	0.687238	0.687238	3.56663e-08	9.26538e-08	98	A0A0A0MRJ7;P12259	F5	Coagulation factor V	A0A0A0MRJ7_HUMAN;FA5_HUMAN	1	61.0198	1.6102	Dengue	QC	NaN	NaN	NaN	50.8833	0.174699
Dengue / QC	_TVM[Oxidation (M)]VNIENPEGIPVKQDSLSSQNQLGVLPLSWDIPELVNMGQWK_	P01024	1.56192	1.56192	3.63141e-08	9.42118e-08	64	P01024	C3	Complement C3	CO3_HUMAN	1	195.247	2.95247	Dengue	QC	NaN	NaN	NaN	55.7491	0.214794
Dengue / QC	_RPDFC[Carbamidomethyl (C)]PFQC[Carbamidomethyl (C)]PAHSHYELC[Carbamidomethyl (C)]GDSC[Carbamidomethyl (C)]PGSC[Carbamidomethyl (C)]PSLSAPEGC[Carbamidomethyl (C)]ESAC[Carbamidomethyl (C)]R_	Q9Y6R7	1.53904	1.53904	3.824e-08	9.8816e-08	50	Q9Y6R7	FCGBP	IgGFc-binding protein	FCGBP_HUMAN	1	190.6	2.906	Dengue	QC	NaN	NaN	NaN	39.707	0.252567
Dengue / QC	_GYTQQLAFR_	P01024	-0.430074	0.430074	3.84745e-08	9.93785e-08	176	P01024	C3	Complement C3	CO3_HUMAN	1	-25.7776	0.742224	Dengue	QC	NaN	NaN	NaN	104.961	0.0719348
Dengue / QC	_MFPGVPLDTHDVFQYR_	P14780	2.713	2.713	3.86918e-08	9.98082e-08	20	P14780	MMP9	Matrix metalloproteinase-9	MMP9_HUMAN	1	555.685	6.55685	Dengue	QC	NaN	NaN	NaN	12.1762	0.272493
Dengue / QC	_KGETFSC[Carbamidomethyl (C)]MVGHEALPLAFTQK_	A0A286YEY5;P01877	1.40226	1.40226	3.89816e-08	1.00424e-07	120	A0A286YEY5;P01877	IGHA2	Immunoglobulin heavy constant alpha 2 (Fragment);Immunoglobulin heavy constant alpha 2	A0A286YEY5_HUMAN;IGHA2_HUMAN	1	164.315	2.64315	Dengue	QC	NaN	NaN	NaN	83.6852	0.185354
Dengue / QC	_DKVTAWK_	P19827	0.746514	0.746514	3.94826e-08	1.01448e-07	46	P19827	ITIH1	Inter-alpha-trypsin inhibitor heavy chain H1	ITIH1_HUMAN	1	67.7734	1.67773	Dengue	QC	NaN	NaN	NaN	41.6546	0.124026
Dengue / QC	_YAASSYLSLTPEQWKSHR_	P0DOY2	0.561049	0.561049	4.0196e-08	1.03146e-07	156	P0DOY2	IGLC2	Immunoglobulin lambda constant 2	IGLC2_HUMAN	1	47.5342	1.47534	Dengue	QC	NaN	NaN	NaN	145.375	0.11528
Dengue / QC	_EAFQLFDR_	B7Z6Z4;F8W1R7;G3V1V0;G3V1Y7;G8JLA2;J3KND3;P60660;P60660-2	0.992478	0.992478	4.26848e-08	1.09104e-07	36	B7Z6Z4;F8W1R7;G3V1V0;G3V1Y7;G8JLA2;J3KND3;P60660;P60660-2	MYL6	Myosin light polypeptide 6;Myosin light polypeptide 6;Myosin light polypeptide 6;Myosin light polypeptide 6;Myosin light polypeptide 6;Myosin light polypeptide 6;Myosin light polypeptide 6;Isoform Smooth muscle of Myosin light polypeptide 6	B7Z6Z4_HUMAN;F8W1R7_HUMAN;G3V1V0_HUMAN;G3V1Y7_HUMAN;G8JLA2_HUMAN;J3KND3_HUMAN;MYL6_HUMAN;MYL6_HUMAN	1	98.9599	1.9896	Dengue	QC	NaN	NaN	NaN	16.1653	0.460882
Dengue / QC	_LVGGPMDASVEEEGVR_	P01034	1.46645	1.46645	4.30294e-08	1.09842e-07	26	P01034	CST3	Cystatin-C	CYTC_HUMAN	1	176.341	2.76341	Dengue	QC	NaN	NaN	NaN	19.2733	0.26147
Dengue / QC	_SGNTFRPEVHLLPPPSEELALNELVTLTC[Carbamidomethyl (C)]LAR_	A0A0G2JMB2	0.622399	0.622399	4.33467e-08	1.10556e-07	176	A0A0G2JMB2	IGHA2	Immunoglobulin heavy constant alpha 2 (Fragment)	A0A0G2JMB2_HUMAN	1	53.9433	1.53943	Dengue	QC	NaN	NaN	NaN	165.908	0.109287
Dengue / QC	_FLMKGPNK_	P08603	1.54008	1.54008	4.34808e-08	1.1085e-07	68	P08603	CFH	Complement factor H	CFAH_HUMAN	1	190.811	2.90811	Dengue	QC	NaN	NaN	NaN	46.0026	0.218738
Dengue / QC	_TEHGSEMLFFGNAIEGK_	P04114	0.606761	0.606761	4.51151e-08	1.14668e-07	134	P04114	APOB	Apolipoprotein B-100	APOB_HUMAN	1	52.2837	1.52284	Dengue	QC	NaN	NaN	NaN	123.025	0.101085
Dengue / QC	_EALQGVGDM[Oxidation (M)]GR_	A0A096LPE2	0.550792	0.550792	4.68673e-08	1.18661e-07	86	A0A096LPE2	SAA2-SAA4	SAA2-SAA4 readthrough	A0A096LPE2_HUMAN	1	46.4889	1.46489	Dengue	QC	NaN	NaN	NaN	53.9432	0.106659
Dengue / QC	_QQNAQGGFSSTQDTVVALHALSK_	P01023	-0.503164	0.503164	4.73132e-08	1.19686e-07	176	P01023	A2M	Alpha-2-macroglobulin	A2MG_HUMAN	1	-29.4442	0.705558	Dengue	QC	NaN	NaN	NaN	83.2966	0.0809199
Dengue / QC	_APDAGGC[Carbamidomethyl (C)]LHADPDLGVLC[Carbamidomethyl (C)]PTGC[Carbamidomethyl (C)]QLQEALLQQERPIR_	P02675	1.66813	1.66813	4.75647e-08	1.20219e-07	32	P02675	FGB	Fibrinogen beta chain	FIBB_HUMAN	1	217.803	3.17803	Dengue	QC	NaN	NaN	NaN	26.3701	0.235525
Dengue / QC	_YRC[Carbamidomethyl (C)]HPGYKPTTDEPTTVIC[Carbamidomethyl (C)]QK_	P04003	2.17877	2.17877	4.76424e-08	1.20364e-07	84	P04003	C4BPA	C4b-binding protein alpha chain	C4BPA_HUMAN	1	352.769	4.52769	Dengue	QC	NaN	NaN	NaN	67.4237	0.332107
Dengue / QC	_GVAGGSVAVLC[Carbamidomethyl (C)]PYNR_	P01833	1.60573	1.60573	4.86332e-08	1.22762e-07	92	P01833	PIGR	Polymeric immunoglobulin receptor	PIGR_HUMAN	1	204.35	3.0435	Dengue	QC	NaN	NaN	NaN	66.8378	0.265134
Dengue / QC	_LLIYD[Carboxy]ASSR_	A0A0C4DH25	2.49657	2.49657	4.87513e-08	1.23007e-07	12	A0A0C4DH25	IGKV3D-20	Immunoglobulin kappa variable 3D-20	KVD20_HUMAN	1	464.342	5.64342	Dengue	QC	NaN	NaN	NaN	5.98578	0.255461
Dengue / QC	_NYC[Carbamidomethyl (C)]RNPDGDVGGPWC[Carbamidomethyl (C)]YTTNPR_	P00747	1.00938	1.00938	5.27415e-08	1.32056e-07	142	P00747	PLG	Plasminogen	PLMN_HUMAN	1	101.305	2.01305	Dengue	QC	NaN	NaN	NaN	129.047	0.158536
Dengue / QC	_GATTSPGVYELSSR_	Q9Y6R7	0.948317	0.948317	5.3693e-08	1.34267e-07	138	Q9Y6R7	FCGBP	IgGFc-binding protein	FCGBP_HUMAN	1	92.962	1.92962	Dengue	QC	NaN	NaN	NaN	114.103	0.158046
Dengue / QC	_C[Carbamidomethyl (C)]LAFEC[Carbamidomethyl (C)]PENYRR_	P23142	0.661475	0.661475	5.4763e-08	1.36652e-07	170	P23142	FBLN1	Fibulin-1	FBLN1_HUMAN	1	58.1699	1.5817	Dengue	QC	NaN	NaN	NaN	163.115	0.111135
Dengue / QC	_VIPAC[Carbamidomethyl (C)]LPSPNYVVADRTEC[Carbamidomethyl (C)]FITGWGETQGTFGAGLLK_	P00747	0.491063	0.491063	5.53416e-08	1.37979e-07	132	P00747	PLG	Plasminogen	PLMN_HUMAN	1	40.548	1.40548	Dengue	QC	NaN	NaN	NaN	75.9156	0.0858527
Dengue / QC	_FSAEFDFR_	P07225	0.479432	0.479432	5.53893e-08	1.38039e-07	136	P07225	PROS1	Vitamin K-dependent protein S	PROS_HUMAN	1	39.4195	1.3942	Dengue	QC	NaN	NaN	NaN	84.2867	0.0743114
Dengue / QC	_TAGWNIPMGLLYNKINHC[Carbamidomethyl (C)]RFDEFFSEGC[Carbamidomethyl (C)]APGSK_	P02787	0.744552	0.744552	5.60561e-08	1.39583e-07	174	P02787	TF	Serotransferrin	TRFE_HUMAN	1	67.5454	1.67545	Dengue	QC	NaN	NaN	NaN	153.83	0.104134
Dengue / QC	_KLLETEC[Carbamidomethyl (C)]PQYIR_	P05109	1.14483	1.14483	5.69706e-08	1.4168e-07	36	P05109	S100A8	Protein S100-A8	S10A8_HUMAN	1	121.12	2.2112	Dengue	QC	NaN	NaN	NaN	28.2922	0.186408
Dengue / QC	_GSFAC[Carbamidomethyl (C)]QC[Carbamidomethyl (C)]PPGYQK_	Q12805;Q12805-2;Q12805-4	1.25593	1.25593	5.76073e-08	1.43203e-07	56	Q12805;Q12805-2;Q12805-4	EFEMP1	EGF-containing fibulin-like extracellular matrix protein 1;Isoform 2 of EGF-containing fibulin-like extracellular matrix protein 1;Isoform 4 of EGF-containing fibulin-like extracellular matrix protein 1	FBLN3_HUMAN	1	138.822	2.38822	Dengue	QC	NaN	NaN	NaN	43.756	0.175446
Dengue / QC	_EEMTKNQVSLTC[Carbamidomethyl (C)]LVK_	P01860	0.809778	0.809778	5.77924e-08	1.43542e-07	172	P01860	IGHG3	Immunoglobulin heavy constant gamma 3	IGHG3_HUMAN	1	75.2941	1.75294	Dengue	QC	NaN	NaN	NaN	136.955	0.118343
Dengue / QC	_DGHVILQLNSIPSSDFLC[Carbamidomethyl (C)]VR_	P01031	0.83411	0.83411	5.81304e-08	1.4432e-07	74	P01031	C5	Complement C5	CO5_HUMAN	1	78.2757	1.78276	Dengue	QC	NaN	NaN	NaN	40.7427	0.132756
Dengue / QC	_SC[Carbamidomethyl (C)]DVESNPGIFLPPGTQAEFNLR_	I3L145;P04278	1.20469	1.20469	5.8316e-08	1.4472e-07	74	I3L145;P04278	SHBG	Sex hormone-binding globulin	I3L145_HUMAN;SHBG_HUMAN	1	130.488	2.30488	Dengue	QC	NaN	NaN	NaN	42.8403	0.163242
Dengue / QC	_LEPYADQLR_	P06727	0.540054	0.540054	5.99311e-08	1.48353e-07	110	P06727	APOA4	Apolipoprotein A-IV	APOA4_HUMAN	1	45.4027	1.45403	Dengue	QC	NaN	NaN	NaN	91.6019	0.104252
Dengue / QC	_GSVFLRNPSRNNVPC[Carbamidomethyl (C)]SPK_	P0C0L5	1.00999	1.00999	6.01654e-08	1.48842e-07	122	P0C0L5	C4B	Complement C4-B	CO4B_HUMAN	1	101.39	2.0139	Dengue	QC	NaN	NaN	NaN	70.8027	0.136273
Dengue / QC	_NGIDIYSLTVDSR_	Q14624	0.535192	0.535192	6.03868e-08	1.49292e-07	82	Q14624	ITIH4	Inter-alpha-trypsin inhibitor heavy chain H4	ITIH4_HUMAN	1	44.9135	1.44914	Dengue	QC	NaN	NaN	NaN	51.1605	0.113666
Dengue / QC	_EATEAAKC[Carbamidomethyl (C)]NLLAEK_	P02765	1.14205	1.14205	6.35125e-08	1.56363e-07	138	P02765	AHSG	Alpha-2-HS-glycoprotein	FETUA_HUMAN	1	120.695	2.20695	Dengue	QC	NaN	NaN	NaN	121.76	0.18471
Dengue / QC	_LFDSDPITVTVPVEVSRK_	P10909;P10909-2;P10909-4;P10909-5	0.327756	0.327756	6.39061e-08	1.572e-07	114	P10909;P10909-2;P10909-4;P10909-5	CLU	Clusterin;Isoform 2 of Clusterin;Isoform 4 of Clusterin;Isoform 5 of Clusterin	CLUS_HUMAN	1	25.506	1.25506	Dengue	QC	NaN	NaN	NaN	91.3145	0.0666205
Dengue / QC	_TFVNITPAEVGVLVGK_	P07737	1.25531	1.25531	6.40621e-08	1.57518e-07	50	P07737	PFN1	Profilin-1	PROF1_HUMAN	1	138.718	2.38718	Dengue	QC	NaN	NaN	NaN	21.6487	0.199348
Dengue / QC	_ETEGLRQEMSKDLEEVK_	P02647	0.728605	0.728605	7.12265e-08	1.73683e-07	80	P02647	APOA1	Apolipoprotein A-I	APOA1_HUMAN	1	65.7036	1.65704	Dengue	QC	NaN	NaN	NaN	69.4508	0.0953536
Dengue / QC	_C[Carbamidomethyl (C)]DPHEATC[Carbamidomethyl (C)]YDDGK_	P02751;P02751-15;P02751-3;P02751-7	1.11552	1.11552	7.12202e-08	1.73683e-07	48	P02751;P02751-15;P02751-3;P02751-7	FN1	Fibronectin;Isoform 15 of Fibronectin;Isoform 3 of Fibronectin;Isoform 7 of Fibronectin	FINC_HUMAN	1	116.673	2.16673	Dengue	QC	NaN	NaN	NaN	30.5156	0.252871
Dengue / QC	_GSESGIFTNTK_	P02671	1.62554	1.62554	7.1461e-08	1.7411e-07	168	P02671	FGA	Fibrinogen alpha chain	FIBA_HUMAN	1	208.557	3.08557	Dengue	QC	NaN	NaN	NaN	127.34	0.250513
Dengue / QC	_A[Acetyl (Protein N-term)]GLNSLEAVKR_	P67936	0.756496	0.756496	7.35379e-08	1.788e-07	54	P67936	TPM4	Tropomyosin alpha-4 chain	TPM4_HUMAN	1	68.9382	1.68938	Dengue	QC	NaN	NaN	NaN	46.1122	0.130441
Dengue / QC	_VTISVDK_	A0A075B6R2	0.741062	0.741062	7.40079e-08	1.79795e-07	80	A0A075B6R2	IGHV4-4	Immunoglobulin heavy variable 4-4	HV404_HUMAN	1	67.1406	1.67141	Dengue	QC	NaN	NaN	NaN	53.7036	0.115569
Dengue / QC	_MYLGYEYVTAIRNLR_	P02787	2.40468	2.40468	7.42696e-08	1.80356e-07	66	P02787	TF	Serotransferrin	TRFE_HUMAN	1	429.519	5.29519	Dengue	QC	NaN	NaN	NaN	53.0607	0.262209
Dengue / QC	_SWPAVGNC[Carbamidomethyl (C)]SSALRWLGRYYC[Carbamidomethyl (C)]FQGNQFLR_	P02790	3.51372	3.51372	7.45251e-08	1.80902e-07	30	P02790	HPX	Hemopexin	HEMO_HUMAN	1	1042.18	11.4218	Dengue	QC	NaN	NaN	NaN	20.0141	0.260206
Dengue / QC	_TIHLTMPQLVLQGSYDLQDLLAQAELPAILHTELNLQK_	P01019	0.955735	0.955735	7.58694e-08	1.83484e-07	96	P01019	AGT	Angiotensinogen	ANGT_HUMAN	1	93.9568	1.93957	Dengue	QC	NaN	NaN	NaN	55.8979	0.137105
Dengue / QC	_C[Carbamidomethyl (C)]C[Carbamidomethyl (C)]VEC[Carbamidomethyl (C)]PPC[Carbamidomethyl (C)]PAPPVAGPSVFLFPPKPKDTLMISR_	P01859	1.95634	1.95634	7.63883e-08	1.84587e-07	46	P01859	IGHG2	Immunoglobulin heavy constant gamma 2	IGHG2_HUMAN	1	288.077	3.88077	Dengue	QC	NaN	NaN	NaN	39.4688	0.270998
Dengue / QC	_QYADC[Carbamidomethyl (C)]SEIFNDGYK_	Q08830	1.0171	1.0171	7.74058e-08	1.86969e-07	24	Q08830	FGL1	Fibrinogen-like protein 1	FGL1_HUMAN	1	102.385	2.02385	Dengue	QC	NaN	NaN	NaN	19.1434	0.27776
Dengue / QC	_HPYTGPSC[Carbamidomethyl (C)]SQVVPVC[Carbamidomethyl (C)]RPNPC[Carbamidomethyl (C)]QNGATC[Carbamidomethyl (C)]SR_	Q14520;Q14520-2	0.844588	0.844588	7.92889e-08	1.91125e-07	28	Q14520;Q14520-2	HABP2	Hyaluronan-binding protein 2;Isoform 2 of Hyaluronan-binding protein 2	HABP2_HUMAN	1	79.5752	1.79575	Dengue	QC	NaN	NaN	NaN	23.389	0.136308
Dengue / QC	_HPPSPTRDEC[Carbamidomethyl (C)]FAR_	Q16610	1.33305	1.33305	8.09722e-08	1.94624e-07	64	Q16610	ECM1	Extracellular matrix protein 1	ECM1_HUMAN	1	151.936	2.51936	Dengue	QC	NaN	NaN	NaN	50.9723	0.278631
Dengue / QC	_VVFLNTQLC[Carbamidomethyl (C)]QFRPDAFGGLPR_	P22792	0.340302	0.340302	8.15158e-08	1.95771e-07	140	P22792	CPN2	Carboxypeptidase N subunit 2	CPN2_HUMAN	1	26.6021	1.26602	Dengue	QC	NaN	NaN	NaN	89.4588	0.0676718
Dengue / QC	_QDSLSSQNQLGVLPLSWDIPELVNM[Oxidation (M)]GQWK_	P01024	1.76925	1.76925	8.18664e-08	1.96453e-07	70	P01024	C3	Complement C3	CO3_HUMAN	1	240.876	3.40876	Dengue	QC	NaN	NaN	NaN	39.7031	0.18722
Dengue / QC	_DGEKVSVLC[Carbamidomethyl (C)]QENYLIQEGEEITC[Carbamidomethyl (C)]KDGR_	P08603	1.0202	1.0202	8.3924e-08	2.0098e-07	100	P08603	CFH	Complement factor H	CFAH_HUMAN	1	102.819	2.02819	Dengue	QC	NaN	NaN	NaN	84.9167	0.132055
Dengue / QC	_KC[Carbamidomethyl (C)]C[Carbamidomethyl (C)]YDGAC[Carbamidomethyl (C)]VNNDETC[Carbamidomethyl (C)]EQR_	P01031	0.621715	0.621715	8.76034e-08	2.09066e-07	64	P01031	C5	Complement C5	CO5_HUMAN	1	53.8704	1.5387	Dengue	QC	NaN	NaN	NaN	41.8067	0.112571
Dengue / QC	_AVNRADTAKEVSFDVELPK_	Q06033;Q06033-2	0.911576	0.911576	8.8745e-08	2.11407e-07	104	Q06033;Q06033-2	ITIH3	Inter-alpha-trypsin inhibitor heavy chain H3;Isoform 2 of Inter-alpha-trypsin inhibitor heavy chain H3	ITIH3_HUMAN	1	88.1099	1.8811	Dengue	QC	NaN	NaN	NaN	89.7316	0.149002
Dengue / QC	_C[Carbamidomethyl (C)]VPVC[Carbamidomethyl (C)]GVPREPFEEKQR_	P09871	1.42503	1.42503	9.12719e-08	2.17251e-07	116	P09871	C1S	Complement C1s subcomponent	C1S_HUMAN	1	168.52	2.6852	Dengue	QC	NaN	NaN	NaN	102.867	0.191178
Dengue / QC	_NPNLPPETVDSLKNILTSNNIDVK_	P05090	0.574402	0.574402	9.56588e-08	2.2705e-07	140	P05090	APOD	Apolipoprotein D	APOD_HUMAN	1	48.906	1.48906	Dengue	QC	NaN	NaN	NaN	112.386	0.0788217
Dengue / QC	_WDFDNRPHILHGEYIEFIC[Carbamidomethyl (C)]R_	P05160	0.941345	0.941345	9.64905e-08	2.28747e-07	38	P05160	F13B	Coagulation factor XIII B chain	F13B_HUMAN	1	92.0318	1.92032	Dengue	QC	NaN	NaN	NaN	31.6064	0.140162
Dengue / QC	_HNEVWHLVGITSWGEGC[Carbamidomethyl (C)]AQR_	P03951	1.7355	1.7355	9.70212e-08	2.29728e-07	20	P03951	F11	Coagulation factor XI	FA11_HUMAN	1	232.996	3.32996	Dengue	QC	NaN	NaN	NaN	12.2354	0.200962
Dengue / QC	_TNLESILSYPKDFTC[Carbamidomethyl (C)]VHQALKGFTTK_	P05155;P05155-3	0.86166	0.86166	9.79671e-08	2.31394e-07	62	P05155;P05155-3	SERPING1	Plasma protease C1 inhibitor;Isoform 3 of Plasma protease C1 inhibitor	IC1_HUMAN	1	81.7129	1.81713	Dengue	QC	NaN	NaN	NaN	55.311	0.115245
Dengue / QC	_TPEVTC[Carbamidomethyl (C)]VVVDVSQEDPEVQFNWYVDGVEVHNAK_	P01861	0.608641	0.608641	9.79745e-08	2.31394e-07	26	P01861	IGHG4	Immunoglobulin heavy constant gamma 4	IGHG4_HUMAN	1	52.4822	1.52482	Dengue	QC	NaN	NaN	NaN	10.1474	0.168127
Dengue / QC	_GTHVDLGLASANVDFAFSLYK_	P01011	1.60557	1.60557	9.79717e-08	2.31394e-07	42	P01011	SERPINA3	Alpha-1-antichymotrypsin	AACT_HUMAN	1	204.315	3.04315	Dengue	QC	NaN	NaN	NaN	18.4613	0.168096
Dengue / QC	_LKQKVSVNER_	P00738	2.18995	2.18995	9.93445e-08	2.3438e-07	66	P00738	HP	Haptoglobin	HPT_HUMAN	1	356.29	4.5629	Dengue	QC	NaN	NaN	NaN	46.8052	0.267862
Dengue / QC	_NPNGYSFSIPVK_	P04114	0.377215	0.377215	9.95091e-08	2.34674e-07	62	P04114	APOB	Apolipoprotein B-100	APOB_HUMAN	1	29.8832	1.29883	Dengue	QC	NaN	NaN	NaN	51.7128	0.0591243
Dengue / QC	_LRC[Carbamidomethyl (C)]NGDNDC[Carbamidomethyl (C)]GDFSDEDDC[Carbamidomethyl (C)]ESEPRPPC[Carbamidomethyl (C)]R_	P02748	0.842353	0.842353	1.0173e-07	2.39624e-07	128	P02748	C9	Complement component C9	CO9_HUMAN	1	79.2972	1.79297	Dengue	QC	NaN	NaN	NaN	77.0015	0.117031
Dengue / QC	_GGSTSYGTGSETESPR_	P02671	2.07302	2.07302	1.02048e-07	2.40181e-07	120	P02671	FGA	Fibrinogen alpha chain	FIBA_HUMAN	1	320.768	4.20768	Dengue	QC	NaN	NaN	NaN	93.266	0.331178
Dengue / QC	_AVGSGATFSHYYYMILSRGQIVFMNREPK_	P0C0L5	0.52226	0.52226	1.03131e-07	2.42536e-07	118	P0C0L5	C4B	Complement C4-B	CO4B_HUMAN	1	43.6203	1.4362	Dengue	QC	NaN	NaN	NaN	79.4882	0.0951509
Dengue / QC	_EDFDVEAADSAGNC[Carbamidomethyl (C)]LDSLVFVAGDR_	P09871	2.82367	2.82367	1.03795e-07	2.43708e-07	54	P09871	C1S	Complement C1s subcomponent	C1S_HUMAN	1	607.961	7.07961	Dengue	QC	NaN	NaN	NaN	24.9409	0.27439
Dengue / QC	_TPENYPNAGLTR_	P08519	1.81092	1.81092	1.05182e-07	2.46767e-07	86	P08519	LPA	Apolipoprotein(a)	APOA_HUMAN	1	250.867	3.50867	Dengue	QC	NaN	NaN	NaN	74.0695	0.299561
Dengue / QC	_ALGISPFHEHAEVVFTANDSGPR_	P02766	0.361043	0.361043	1.06576e-07	2.49638e-07	176	P02766	TTR	Transthyretin	TTHY_HUMAN	1	28.4354	1.28435	Dengue	QC	NaN	NaN	NaN	112.236	0.0620497
Dengue / QC	_MADEAGSEADHEGTHSTK_	P02671	1.47041	1.47041	1.07642e-07	2.51836e-07	168	P02671	FGA	Fibrinogen alpha chain	FIBA_HUMAN	1	177.101	2.77101	Dengue	QC	NaN	NaN	NaN	142.098	0.258859
Dengue / QC	_LFGEVTSPLFPKPYPNNFETTTVITVPTGYR_	B4DPQ0	0.607367	0.607367	1.08282e-07	2.53132e-07	116	B4DPQ0	C1R	Complement C1r subcomponent	B4DPQ0_HUMAN	1	52.3477	1.52348	Dengue	QC	NaN	NaN	NaN	93.1527	0.103183
Dengue / QC	_NALTGLPPGLFQASATLDTLVLK_	P02750	0.512634	0.512634	1.09103e-07	2.54948e-07	120	P02750	LRG1	Leucine-rich alpha-2-glycoprotein	A2GL_HUMAN	1	42.6653	1.42665	Dengue	QC	NaN	NaN	NaN	91.605	0.110194
Dengue / QC	_TLLVEAEGIEQEK_	P20742	2.50248	2.50248	1.0948e-07	2.55669e-07	96	P20742	PZP	Pregnancy zone protein	PZP_HUMAN	1	466.659	5.66659	Dengue	QC	NaN	NaN	NaN	65.8169	0.434506
Dengue / QC	_VGSDSVQC[Carbamidomethyl (C)]YQFGWSPNFPTC[Carbamidomethyl (C)]K_	Q9BXR6	0.943541	0.943541	1.09529e-07	2.55669e-07	42	Q9BXR6	CFHR5	Complement factor H-related protein 5	FHR5_HUMAN	1	92.3243	1.92324	Dengue	QC	NaN	NaN	NaN	31.3025	0.187027
Dengue / QC	_NIPC[Carbamidomethyl (C)]AVTK_	P13671	0.633874	0.633874	1.11555e-07	2.59957e-07	44	P13671	C6	Complement component C6	CO6_HUMAN	1	55.1727	1.55173	Dengue	QC	NaN	NaN	NaN	29.4465	0.121626
Dengue / QC	_PAGLPEKY_	P0DJI8	1.57056	1.57056	1.11662e-07	2.60103e-07	46	P0DJI8	SAA1	Serum amyloid A-1 protein	SAA1_HUMAN	1	197.019	2.97019	Dengue	QC	NaN	NaN	NaN	27.0509	0.218608
Dengue / QC	_DSDWPFC[Carbamidomethyl (C)]SDEDWNYK_	P02671	2.3745	2.3745	1.12297e-07	2.61375e-07	44	P02671	FGA	Fibrinogen alpha chain	FIBA_HUMAN	1	418.556	5.18556	Dengue	QC	NaN	NaN	NaN	27.2057	0.279877
Dengue / QC	_AITPPHPASQANIIFDITEGNLRDSFDIIKR_	P23142	0.984236	0.984236	1.1285e-07	2.62558e-07	56	P23142	FBLN1	Fibulin-1	FBLN1_HUMAN	1	97.8266	1.97827	Dengue	QC	NaN	NaN	NaN	48.6029	0.144472
Dengue / QC	_FSC[Carbamidomethyl (C)]FQEEAPQPHYQLR_	Q16610	1.0437	1.0437	1.15522e-07	2.68562e-07	166	Q16610	ECM1	Extracellular matrix protein 1	ECM1_HUMAN	1	106.15	2.0615	Dengue	QC	NaN	NaN	NaN	150.488	0.15393
Dengue / QC	_EFHLHLRLPMSVR_	P0C0L5	0.615178	0.615178	1.1629e-07	2.70241e-07	66	P0C0L5	C4B	Complement C4-B	CO4B_HUMAN	1	53.1747	1.53175	Dengue	QC	NaN	NaN	NaN	27.2181	0.728645
Dengue / QC	_HQQTVTIPPKSSLSVPYVIVPLK_	P01024	0.907434	0.907434	1.1731e-07	2.72074e-07	32	P01024	C3	Complement C3	CO3_HUMAN	1	87.5706	1.87571	Dengue	QC	NaN	NaN	NaN	26.95	0.153642
Dengue / QC	_TPFVTHPGYDTGNGIQLPGTSGQQPSVGQQMIFEEHGFRR_	P02751;P02751-15;P02751-3;P02751-7	0.586013	0.586013	1.17666e-07	2.72622e-07	144	P02751;P02751-15;P02751-3;P02751-7	FN1	Fibronectin;Isoform 15 of Fibronectin;Isoform 3 of Fibronectin;Isoform 7 of Fibronectin	FINC_HUMAN	1	50.1093	1.50109	Dengue	QC	NaN	NaN	NaN	135.023	0.101469
Dengue / QC	_AIAANEADAVTLDAGLVYDAYLAPNNLKPVVAEFYGSK_	P02787	0.409919	0.409919	1.17937e-07	2.72991e-07	174	P02787	TF	Serotransferrin	TRFE_HUMAN	1	32.8611	1.32861	Dengue	QC	NaN	NaN	NaN	84.9697	0.0880054
Dengue / QC	_C[Carbamidomethyl (C)]C[Carbamidomethyl (C)]AAADPHEC[Carbamidomethyl (C)]YAKVFDEFKPLVEEPQNLIK_	P02768	0.920232	0.920232	1.17909e-07	2.72991e-07	52	P02768	ALB	Serum albumin	ALBU_HUMAN	1	89.2419	1.89242	Dengue	QC	NaN	NaN	NaN	27.9421	0.37278
Dengue / QC	_TNTNVNC[Carbamidomethyl (C)]PIEC[Carbamidomethyl (C)]FMPLDVQADREDSRE_	P02751;P02751-15;P02751-3;P02751-7	0.991288	0.991288	1.19296e-07	2.75919e-07	138	P02751;P02751-15;P02751-3;P02751-7	FN1	Fibronectin;Isoform 15 of Fibronectin;Isoform 3 of Fibronectin;Isoform 7 of Fibronectin	FINC_HUMAN	1	98.7958	1.98796	Dengue	QC	NaN	NaN	NaN	120.585	0.138905
Dengue / QC	_AVSM[Oxidation (M)]PSFSILGSDVRVPSYTLILPSLELPVLHVPR_	P04114	0.594256	0.594256	1.19601e-07	2.76516e-07	130	P04114	APOB	Apolipoprotein B-100	APOB_HUMAN	1	50.9694	1.50969	Dengue	QC	NaN	NaN	NaN	72.2491	0.230534
Dengue / QC	_GFPRGDKLFGPDLK_	P08697	-0.354468	0.354468	1.22103e-07	2.81966e-07	102	P08697	SERPINF2	Alpha-2-antiplasmin	A2AP_HUMAN	1	-21.7842	0.782158	Dengue	QC	NaN	NaN	NaN	53.2619	0.244218
Dengue / QC	_C[Carbamidomethyl (C)]GPLMDC[Carbamidomethyl (C)]R_	G3XAK1;P26927	0.982851	0.982851	1.2461e-07	2.86968e-07	50	G3XAK1;P26927	MST1	Hepatocyte growth factor-like protein	G3XAK1_HUMAN;HGFL_HUMAN	1	97.6367	1.97637	Dengue	QC	NaN	NaN	NaN	36.8638	0.234675
Dengue / QC	_GLEWMGR_	A0A0J9YXX1	0.446479	0.446479	1.24723e-07	2.87116e-07	164	A0A0J9YXX1	IGHV5-10-1	Immunoglobulin heavy variable 5-10-1	HV5X1_HUMAN	1	36.2711	1.36271	Dengue	QC	NaN	NaN	NaN	146.083	0.0873835
Dengue / QC	_QRPPDLDTSSNAVDLLFFTDESGDSR_	B4DPQ0	0.573179	0.573179	1.25542e-07	2.88438e-07	134	B4DPQ0	C1R	Complement C1r subcomponent	B4DPQ0_HUMAN	1	48.7799	1.4878	Dengue	QC	NaN	NaN	NaN	94.4989	0.105032
Dengue / QC	_GLLSGWAR_	P22891;P22891-2	0.491435	0.491435	1.28352e-07	2.94664e-07	162	P22891;P22891-2	PROZ	Vitamin K-dependent protein Z;Isoform 2 of Vitamin K-dependent protein Z	PROZ_HUMAN	1	40.5843	1.40584	Dengue	QC	NaN	NaN	NaN	67.7726	0.107525
Dengue / QC	_WTPPRAQITGYR_	P02751;P02751-15;P02751-3;P02751-7	1.23952	1.23952	1.285e-07	2.94888e-07	46	P02751;P02751-15;P02751-3;P02751-7	FN1	Fibronectin;Isoform 15 of Fibronectin;Isoform 3 of Fibronectin;Isoform 7 of Fibronectin	FINC_HUMAN	1	136.119	2.36119	Dengue	QC	NaN	NaN	NaN	38.9771	0.229606
Dengue / QC	_ISTSLPVLDLIDAIQPGSINYDLLK_	P13796	0.720645	0.720645	1.28772e-07	2.95398e-07	62	P13796	LCP1	Plastin-2	PLSL_HUMAN	1	64.7919	1.64792	Dengue	QC	NaN	NaN	NaN	55.335	0.101374
Dengue / QC	_LSGALHVYSLGSD_	P80108	0.880315	0.880315	1.29399e-07	2.9672e-07	50	P80108	GPLD1	Phosphatidylinositol-glycan-specific phospholipase D	PHLD_HUMAN	1	84.0778	1.84078	Dengue	QC	NaN	NaN	NaN	31.3698	0.108646
Dengue / QC	_YKNFATSNK_	P04114	0.986152	0.986152	1.30146e-07	2.97968e-07	34	P04114	APOB	Apolipoprotein B-100	APOB_HUMAN	1	98.0895	1.98089	Dengue	QC	NaN	NaN	NaN	28.6331	0.159103
Dengue / QC	_KGGETSEMYLIQPDSSVKPYR_	P02675	2.36997	2.36997	1.31876e-07	3.01578e-07	140	P02675	FGB	Fibrinogen beta chain	FIBB_HUMAN	1	416.93	5.1693	Dengue	QC	NaN	NaN	NaN	118.016	0.383228
Dengue / QC	_IGLDLPALNMQR_	P05164;P05164-2;P05164-3	0.990932	0.990932	1.32642e-07	3.03093e-07	58	P05164;P05164-2;P05164-3	MPO	Myeloperoxidase;Isoform H14 of Myeloperoxidase;Isoform H7 of Myeloperoxidase	PERM_HUMAN	1	98.7468	1.98747	Dengue	QC	NaN	NaN	NaN	41.1149	0.191506
Dengue / QC	_KALDNLAR_	O14791;O14791-2	1.18966	1.18966	1.34287e-07	3.06613e-07	28	O14791;O14791-2	APOL1	Apolipoprotein L1;Isoform 2 of Apolipoprotein L1	APOL1_HUMAN	1	128.1	2.281	Dengue	QC	NaN	NaN	NaN	10.7205	0.140525
Dengue / QC	_YYWGGQYTWDMAK_	P02675	3.14294	3.14294	1.35108e-07	3.08249e-07	104	P02675	FGB	Fibrinogen beta chain	FIBB_HUMAN	1	783.32	8.8332	Dengue	QC	NaN	NaN	NaN	69.2862	0.44345
Dengue / QC	_HQSAC[Carbamidomethyl (C)]KDSDWPFC[Carbamidomethyl (C)]SDEDWNYKC[Carbamidomethyl (C)]PSGC[Carbamidomethyl (C)]R_	P02671	1.74024	1.74024	1.35452e-07	3.08914e-07	42	P02671	FGA	Fibrinogen alpha chain	FIBA_HUMAN	1	234.09	3.3409	Dengue	QC	NaN	NaN	NaN	36.0555	0.254361
Dengue / QC	_LVDEDMNSFK_	Q06033;Q06033-2	-0.470626	0.470626	1.35709e-07	3.09381e-07	172	Q06033;Q06033-2	ITIH3	Inter-alpha-trypsin inhibitor heavy chain H3;Isoform 2 of Inter-alpha-trypsin inhibitor heavy chain H3	ITIH3_HUMAN	1	-27.8349	0.721651	Dengue	QC	NaN	NaN	NaN	62.4401	0.0761787
Dengue / QC	_SLGPNSC[Carbamidomethyl (C)]SANGPGLYLIHGPNLYC[Carbamidomethyl (C)]YSDVEK_	P02790	0.467071	0.467071	1.37507e-07	3.13358e-07	176	P02790	HPX	Hemopexin	HEMO_HUMAN	1	38.23	1.3823	Dengue	QC	NaN	NaN	NaN	88.8481	0.0680163
Dengue / QC	_LMIYEVSNRPSGVPDR_	A0A075B6J9	-0.474101	0.474101	1.37979e-07	3.14312e-07	116	A0A075B6J9	IGLV2-18	Immunoglobulin lambda variable 2-18	LV218_HUMAN	1	-28.0085	0.719915	Dengue	QC	NaN	NaN	NaN	91.2306	0.0989463
Dengue / QC	_SPLFMGK_	P01009	-0.356263	0.356263	1.41317e-07	3.21171e-07	176	P01009	SERPINA1	Alpha-1-antitrypsin	A1AT_HUMAN	1	-21.8814	0.781186	Dengue	QC	NaN	NaN	NaN	81.7759	0.0646506
Dengue / QC	_SGLSTGWTQLSKLLELTGPK_	P04217	1.58471	1.58471	1.43834e-07	3.26135e-07	142	P04217	A1BG	Alpha-1B-glycoprotein	A1BG_HUMAN	1	199.948	2.99948	Dengue	QC	NaN	NaN	NaN	127.16	0.238256
Dengue / QC	_AEPLAFTFSHDYK_	P04114	0.456664	0.456664	1.44941e-07	3.28392e-07	106	P04114	APOB	Apolipoprotein B-100	APOB_HUMAN	1	37.2365	1.37237	Dengue	QC	NaN	NaN	NaN	72.5895	0.0741019
Dengue / QC	_C[Carbamidomethyl (C)]C[Carbamidomethyl (C)]QDGVTRLPMMR_	P0C0L5	1.28733	1.28733	1.47106e-07	3.32784e-07	176	P0C0L5	C4B	Complement C4-B	CO4B_HUMAN	1	144.076	2.44076	Dengue	QC	NaN	NaN	NaN	141.148	0.201982
Dengue / QC	_HRHPDEAAFFDTASTGK_	P02671	2.36244	2.36244	1.48549e-07	3.35532e-07	170	P02671	FGA	Fibrinogen alpha chain	FIBA_HUMAN	1	414.239	5.14239	Dengue	QC	NaN	NaN	NaN	138.929	0.359836
Dengue / QC	_QAAGSGHLLALGTPENPSWLSLHLQDQK_	I3L145;P04278	0.766714	0.766714	1.50087e-07	3.38746e-07	56	I3L145;P04278	SHBG	Sex hormone-binding globulin	I3L145_HUMAN;SHBG_HUMAN	1	70.1391	1.70139	Dengue	QC	NaN	NaN	NaN	40.544	0.172236
Dengue / QC	_GLMAALC[Carbamidomethyl (C)]PHKFPAIQNLALR_	P08571	0.608142	0.608142	1.51435e-07	3.4151e-07	118	P08571	CD14	Monocyte differentiation antigen CD14	CD14_HUMAN	1	52.4295	1.5243	Dengue	QC	NaN	NaN	NaN	66.4299	0.103761
Dengue / QC	_SLALGTFAHTPALASLGLSNNR_	P35858;P35858-2	0.708927	0.708927	1.54626e-07	3.48189e-07	136	P35858;P35858-2	IGFALS	Insulin-like growth factor-binding protein complex acid labile subunit;Isoform 2 of Insulin-like growth factor-binding protein complex acid labile subunit	ALS_HUMAN	1	63.4587	1.63459	Dengue	QC	NaN	NaN	NaN	85.9291	0.112837
Dengue / QC	_DSHSLTTNIMEILR_	P02671	2.31153	2.31153	1.55029e-07	3.48963e-07	78	P02671	FGA	Fibrinogen alpha chain	FIBA_HUMAN	1	396.409	4.96409	Dengue	QC	NaN	NaN	NaN	57.287	0.249138
Dengue / QC	_ALRDFALQNPSAVPR_	P35858;P35858-2	0.396044	0.396044	1.55538e-07	3.49976e-07	120	P35858;P35858-2	IGFALS	Insulin-like growth factor-binding protein complex acid labile subunit;Isoform 2 of Insulin-like growth factor-binding protein complex acid labile subunit	ALS_HUMAN	1	31.5895	1.31589	Dengue	QC	NaN	NaN	NaN	111.386	0.0649411
Dengue / QC	_LKHELTDEELQSLFTNFANVVDK_	P43652	0.719806	0.719806	1.57026e-07	3.5265e-07	120	P43652	AFM	Afamin	AFAM_HUMAN	1	64.696	1.64696	Dengue	QC	NaN	NaN	NaN	94.2009	0.144534
Dengue / QC	_LSNLIKLAQKVPTADLEDVLPLAEDITNILSK_	P02774;P02774-3	1.85776	1.85776	1.58995e-07	3.56391e-07	46	P02774;P02774-3	GC	Vitamin D-binding protein;Isoform 3 of Vitamin D-binding protein	VTDB_HUMAN	1	262.445	3.62445	Dengue	QC	NaN	NaN	NaN	37.4603	0.310995
Dengue / QC	_ASQGISNSLAW[Carboxy]YQQKPGKAPK_	A0A0G2JRQ6	1.18672	1.18672	1.6017e-07	3.58889e-07	40	A0A0G2JRQ6	NaN	Uncharacterized protein (Fragment)	A0A0G2JRQ6_HUMAN	1	127.634	2.27634	Dengue	QC	NaN	NaN	NaN	16.674	0.864409
Dengue / QC	_NELIPLIYLENPRR_	P20742	1.81073	1.81073	1.62293e-07	3.63092e-07	148	P20742	PZP	Pregnancy zone protein	PZP_HUMAN	1	250.819	3.50819	Dengue	QC	NaN	NaN	NaN	107.785	0.303922
Dengue / QC	_AFQPFFVELTMPYSVIRGEAFTLK_	P01023	0.714017	0.714017	1.62414e-07	3.63224e-07	130	P01023	A2M	Alpha-2-macroglobulin	A2MG_HUMAN	1	64.0365	1.64037	Dengue	QC	NaN	NaN	NaN	99.6827	0.126808
Dengue / QC	_SLHTLFGDK_	P02768	-0.412107	0.412107	1.62521e-07	3.63326e-07	176	P02768	ALB	Serum albumin	ALBU_HUMAN	1	-24.8475	0.751525	Dengue	QC	NaN	NaN	NaN	91.7642	0.0724779
Dengue / QC	_FQLFGSPSGQK_	E7ER44;P02788	1.27947	1.27947	1.63967e-07	3.66418e-07	54	E7ER44;P02788	LTF	Lactotransferrin	E7ER44_HUMAN;TRFL_HUMAN	1	142.75	2.4275	Dengue	QC	NaN	NaN	NaN	38.4887	0.254389
Dengue / QC	_GFLLWYSGR_	Q15113	0.919324	0.919324	1.64244e-07	3.66898e-07	46	Q15113	PCOLCE	Procollagen C-endopeptidase enhancer 1	PCOC1_HUMAN	1	89.1229	1.89123	Dengue	QC	NaN	NaN	NaN	29.4809	0.184847
Dengue / QC	_STVELFKFQEEEKSLLHLK_	P27169	0.797575	0.797575	1.68675e-07	3.75514e-07	74	P27169	PON1	Serum paraoxonase/arylesterase 1	PON1_HUMAN	1	73.8177	1.73818	Dengue	QC	NaN	NaN	NaN	48.0434	0.123792
Dengue / QC	_EQVQSC[Carbamidomethyl (C)]GPPPELLNGNVKEK_	P08603	0.630719	0.630719	1.68669e-07	3.75514e-07	138	P08603	CFH	Complement factor H	CFAH_HUMAN	1	54.8337	1.54834	Dengue	QC	NaN	NaN	NaN	127.532	0.10293
Dengue / QC	_YIETDPANRDRR_	P06396	2.25974	2.25974	1.68609e-07	3.75514e-07	34	P06396	GSN	Gelsolin	GELS_HUMAN	1	378.906	4.78906	Dengue	QC	NaN	NaN	NaN	26.5203	0.243135
Dengue / QC	_HTLNQIDEVKVWPQQPSGELFEIEIDTLETTC[Carbamidomethyl (C)]HVLDPTPVAR_	P02765	0.723074	0.723074	1.69176e-07	3.76344e-07	162	P02765	AHSG	Alpha-2-HS-glycoprotein	FETUA_HUMAN	1	65.0696	1.6507	Dengue	QC	NaN	NaN	NaN	81.8094	0.102634
Dengue / QC	_LIQGAPTIR_	P18065	1.03858	1.03858	1.74654e-07	3.87652e-07	66	P18065	IGFBP2	Insulin-like growth factor-binding protein 2	IBP2_HUMAN	1	105.42	2.0542	Dengue	QC	NaN	NaN	NaN	49.6991	0.196798
Dengue / QC	_WEDPGKQLYNVEATSYALLALLQLKDFDFVPPVVR_	P01024	1.06417	1.06417	1.78228e-07	3.95286e-07	54	P01024	C3	Complement C3	CO3_HUMAN	1	109.096	2.09096	Dengue	QC	NaN	NaN	NaN	29.6116	0.223225
Dengue / QC	_FTIYNNMFC[Carbamidomethyl (C)]AGFHEGGR_	P00740	0.613333	0.613333	1.83988e-07	4.06528e-07	78	P00740	F9	Coagulation factor IX	FA9_HUMAN	1	52.9789	1.52979	Dengue	QC	NaN	NaN	NaN	58.0324	0.0818162
Dengue / QC	_DSITTWEILAVSM[Oxidation (M)]SDKK_	P01024	1.18093	1.18093	1.88588e-07	4.156e-07	36	P01024	C3	Complement C3	CO3_HUMAN	1	126.723	2.26723	Dengue	QC	NaN	NaN	NaN	28.0635	0.127484
Dengue / QC	_ELSYYSLEDLNNK_	P01031	0.235649	0.235649	1.90074e-07	4.18562e-07	110	P01031	C5	Complement C5	CO5_HUMAN	1	17.7437	1.17744	Dengue	QC	NaN	NaN	NaN	92.2129	0.0803773
Dengue / QC	_DIFTGLIGPM[Oxidation (M)]K_	P00450	0.909617	0.909617	1.93286e-07	4.24682e-07	38	P00450	CP	Ceruloplasmin	CERU_HUMAN	1	87.8546	1.87855	Dengue	QC	NaN	NaN	NaN	22.7179	0.158317
Dengue / QC	_YEKPGSPPREVVPR_	P02751;P02751-15;P02751-3;P02751-7	1.27024	1.27024	1.96693e-07	4.31522e-07	40	P02751;P02751-15;P02751-3;P02751-7	FN1	Fibronectin;Isoform 15 of Fibronectin;Isoform 3 of Fibronectin;Isoform 7 of Fibronectin	FINC_HUMAN	1	141.202	2.41202	Dengue	QC	NaN	NaN	NaN	25.5549	0.195107
Dengue / QC	_SSFQVTTC[Carbamidomethyl (C)]K_	P03950	0.926511	0.926511	1.99729e-07	4.37204e-07	72	P03950	ANG	Angiogenin	ANGI_HUMAN	1	90.0674	1.90067	Dengue	QC	NaN	NaN	NaN	67.5856	0.144215
Dengue / QC	_DRDGNTLTYYR_	P02748	-0.411311	0.411311	2.03274e-07	4.44302e-07	174	P02748	C9	Complement component C9	CO9_HUMAN	1	-24.806	0.75194	Dengue	QC	NaN	NaN	NaN	77.9884	0.0736621
Dengue / QC	_TFPGFFSPMLGEFVSETESR_	P02671	1.98472	1.98472	2.05333e-07	4.48303e-07	176	P02671	FGA	Fibrinogen alpha chain	FIBA_HUMAN	1	295.785	3.95785	Dengue	QC	NaN	NaN	NaN	139.117	0.366423
Dengue / QC	_SLNPNRVTFK_	P01008	1.00483	1.00483	2.07618e-07	4.52956e-07	168	P01008	SERPINC1	Antithrombin-III	ANT3_HUMAN	1	100.671	2.00671	Dengue	QC	NaN	NaN	NaN	151.079	0.166086
Dengue / QC	_GHMLENHVERLWAYLTIQELLAKR_	P19827	0.687819	0.687819	2.08719e-07	4.55022e-07	162	P19827	ITIH1	Inter-alpha-trypsin inhibitor heavy chain H1	ITIH1_HUMAN	1	61.0847	1.61085	Dengue	QC	NaN	NaN	NaN	118.304	0.115021
Dengue / QC	_TFGSGEADC[Carbamidomethyl (C)]GLRPLFEKK_	P00734	0.894325	0.894325	2.10471e-07	4.5867e-07	160	P00734	F2	Prothrombin	THRB_HUMAN	1	85.874	1.85874	Dengue	QC	NaN	NaN	NaN	142.455	0.12555
Dengue / QC	_ILDDLSPR_	Q14624	-0.535579	0.535579	2.11968e-07	4.6159e-07	174	Q14624	ITIH4	Inter-alpha-trypsin inhibitor heavy chain H4	ITIH4_HUMAN	1	-31.0118	0.689882	Dengue	QC	NaN	NaN	NaN	52.916	0.0911652
Dengue / QC	_SILFLGK_	P05543	-0.733871	0.733871	2.1308e-07	4.63669e-07	174	P05543	SERPINA7	Thyroxine-binding globulin	THBG_HUMAN	1	-39.8711	0.601289	Dengue	QC	NaN	NaN	NaN	44.0754	0.118306
Dengue / QC	_YDVENC[Carbamidomethyl (C)]LANK_	P01023	-0.43628	0.43628	2.1845e-07	4.73952e-07	172	P01023	A2M	Alpha-2-macroglobulin	A2MG_HUMAN	1	-26.0962	0.739038	Dengue	QC	NaN	NaN	NaN	121.232	0.0777596
Dengue / QC	_EESPLLIGQQSTVSDVPRDLEVVAATPTSLLISWDAPAVTVR_	P02751;P02751-15;P02751-3;P02751-7	0.741416	0.741416	2.22674e-07	4.82051e-07	110	P02751;P02751-15;P02751-3;P02751-7	FN1	Fibronectin;Isoform 15 of Fibronectin;Isoform 3 of Fibronectin;Isoform 7 of Fibronectin	FINC_HUMAN	1	67.1816	1.67182	Dengue	QC	NaN	NaN	NaN	29.2112	0.196667
Dengue / QC	_TFYEPGEEITYSC[Carbamidomethyl (C)]K_	P02749	0.515883	0.515883	2.24522e-07	4.85159e-07	70	P02749	APOH	Beta-2-glycoprotein 1	APOH_HUMAN	1	42.9869	1.42987	Dengue	QC	NaN	NaN	NaN	52.7603	0.101694
Dengue / QC	_C[Carbamidomethyl (C)]VLFPYGGC[Carbamidomethyl (C)]QGNGNKFYSEK_	P02760	2.45161	2.45161	2.26589e-07	4.89266e-07	18	P02760	AMBP	Protein AMBP	AMBP_HUMAN	1	447.027	5.47027	Dengue	QC	NaN	NaN	NaN	12.1327	0.188262
Dengue / QC	_FQILTLWLPDSLTTWEIHGLSLSK_	P0C0L5	0.706459	0.706459	2.2912e-07	4.94368e-07	62	P0C0L5	C4B	Complement C4-B	CO4B_HUMAN	1	63.1794	1.63179	Dengue	QC	NaN	NaN	NaN	41.5561	0.150107
Dengue / QC	_TLSPVLESPR_	A0A087X0I0;A0A140T8Y3;A0A140T8Z8;A0A140TA52;P22105;P22105-3;P22105-4	0.479587	0.479587	2.34043e-07	5.04435e-07	38	A0A087X0I0;A0A140T8Y3;A0A140T8Z8;A0A140TA52;P22105;P22105-3;P22105-4	TNXB	Tenascin-X;Tenascin-X;Tenascin-X (Fragment);Tenascin-X;Tenascin-X;Isoform 4 of Tenascin-X;Isoform 5 of Tenascin-X	A0A087X0I0_HUMAN;A0A140T8Y3_HUMAN;A0A140T8Z8_HUMAN;A0A140TA52_HUMAN;TENX_HUMAN;TENX_HUMAN;TENX_HUMAN	1	39.4345	1.39434	Dengue	QC	NaN	NaN	NaN	28.0702	0.19068
Dengue / QC	_ATGVLYDYVNK_	P04114	1.10859	1.10859	2.37943e-07	5.12279e-07	32	P04114	APOB	Apolipoprotein B-100	APOB_HUMAN	1	115.635	2.15635	Dengue	QC	NaN	NaN	NaN	22.4387	0.133369
Dengue / QC	_MVQEQC[Carbamidomethyl (C)]C[Carbamidomethyl (C)]HSQLEELHC[Carbamidomethyl (C)]ATGISLANEQDR_	P23142	0.88209	0.88209	2.4196e-07	5.20546e-07	144	P23142	FBLN1	Fibulin-1	FBLN1_HUMAN	1	84.3044	1.84304	Dengue	QC	NaN	NaN	NaN	119.237	0.156251
Dengue / QC	_EIGELYLPK_	P01011	-0.447397	0.447397	2.44438e-07	5.25684e-07	176	P01011	SERPINA3	Alpha-1-antichymotrypsin	AACT_HUMAN	1	-26.6635	0.733365	Dengue	QC	NaN	NaN	NaN	119.853	0.0752464
Dengue / QC	_QEDDLANINQWVK_	P08697	0.541822	0.541822	2.46892e-07	5.3038e-07	112	P08697	SERPINF2	Alpha-2-antiplasmin	A2AP_HUMAN	1	45.581	1.45581	Dengue	QC	NaN	NaN	NaN	76.8047	0.0847362
Dengue / QC	_YSQKFQGR_	A0A0C4DH29	1.41591	1.41591	2.49238e-07	5.35224e-07	60	A0A0C4DH29	IGHV1-3	Immunoglobulin heavy variable 1-3	HV103_HUMAN	1	166.829	2.66829	Dengue	QC	NaN	NaN	NaN	53.9323	0.201809
Dengue / QC	_LVNIAVDER_	A0A0C4DFP6;Q9NQ79;Q9NQ79-2	0.534706	0.534706	2.54274e-07	5.45044e-07	136	A0A0C4DFP6;Q9NQ79;Q9NQ79-2	CRTAC1	Cartilage acidic protein 1;Cartilage acidic protein 1;Isoform 2 of Cartilage acidic protein 1	A0A0C4DFP6_HUMAN;CRAC1_HUMAN;CRAC1_HUMAN	1	44.8647	1.44865	Dengue	QC	NaN	NaN	NaN	64.5495	0.113433
Dengue / QC	_FSGSGAGTDFTLK_	A0A0C4DH68	-0.534722	0.534722	2.54925e-07	5.45843e-07	176	A0A0C4DH68	IGKV2-24	Immunoglobulin kappa variable 2-24	KV224_HUMAN	1	-30.9708	0.690292	Dengue	QC	NaN	NaN	NaN	86.3461	0.0822981
Dengue / QC	_RPWNVASLIYETK_	P02748	-0.612556	0.612556	2.55162e-07	5.45919e-07	176	P02748	C9	Complement component C9	CO9_HUMAN	1	-34.5963	0.654037	Dengue	QC	NaN	NaN	NaN	51.3245	0.101915
Dengue / QC	_LC[Carbamidomethyl (C)]FFPFVENGHSESSGQTHLEGDTVQIIC[Carbamidomethyl (C)]NTGYR_	Q03591	0.549368	0.549368	2.60224e-07	5.55572e-07	140	Q03591	CFHR1	Complement factor H-related protein 1	FHR1_HUMAN	1	46.3444	1.46344	Dengue	QC	NaN	NaN	NaN	100.57	0.0827321
Dengue / QC	_RTFVLSALQPSPTHSSSNTQR_	P19827	1.18868	1.18868	2.61096e-07	5.57232e-07	30	P19827	ITIH1	Inter-alpha-trypsin inhibitor heavy chain H1	ITIH1_HUMAN	1	127.944	2.27944	Dengue	QC	NaN	NaN	NaN	16.8623	0.213422
Dengue / QC	_ATWSGAVLAGR_	P04217	-0.473918	0.473918	2.61871e-07	5.58684e-07	162	P04217	A1BG	Alpha-1B-glycoprotein	A1BG_HUMAN	1	-27.9994	0.720006	Dengue	QC	NaN	NaN	NaN	47.7533	0.0816223
Dengue / QC	_EC[Carbamidomethyl (C)]NNPPPSGGGR_	P10643	0.444571	0.444571	2.68703e-07	5.72843e-07	88	P10643	C7	Complement component C7	CO7_HUMAN	1	36.0909	1.36091	Dengue	QC	NaN	NaN	NaN	59.9005	0.112601
Dengue / QC	_VPQVSTPTLVEVSRNLGKVGSK_	P02768	2.04674	2.04674	2.7374e-07	5.82316e-07	48	P02768	ALB	Serum albumin	ALBU_HUMAN	1	313.172	4.13172	Dengue	QC	NaN	NaN	NaN	35.5934	0.295931
Dengue / QC	_TMSGLEC[Carbamidomethyl (C)]QAWDSQSPHAHGYIPSK_	P00747	0.357139	0.357139	2.75308e-07	5.85228e-07	70	P00747	PLG	Plasminogen	PLMN_HUMAN	1	28.0883	1.28088	Dengue	QC	NaN	NaN	NaN	58.7022	0.0762621
Dengue / QC	_EIPDEISILLLGVAHFK_	P36955	0.837616	0.837616	2.77012e-07	5.88212e-07	136	P36955	SERPINF1	Pigment epithelium-derived factor	PEDF_HUMAN	1	78.7095	1.78709	Dengue	QC	NaN	NaN	NaN	85.729	0.110106
Dengue / QC	_HLSQDTGSPSGMRPWEDLPSQDTGSPSR_	A0A0A0MRJ7;P12259	0.692602	0.692602	2.78242e-07	5.90611e-07	54	A0A0A0MRJ7;P12259	F5	Coagulation factor V	A0A0A0MRJ7_HUMAN;FA5_HUMAN	1	61.6196	1.6162	Dengue	QC	NaN	NaN	NaN	36.6717	0.13153
Dengue / QC	_SVQWC[Carbamidomethyl (C)]AVSQPEATK_	E7ER44;P02788	1.50839	1.50839	2.79177e-07	5.92382e-07	32	E7ER44;P02788	LTF	Lactotransferrin	E7ER44_HUMAN;TRFL_HUMAN	1	184.493	2.84493	Dengue	QC	NaN	NaN	NaN	23.7655	0.231524
Dengue / QC	_LKMLEVPYVDR_	P00742	1.11047	1.11047	2.90814e-07	6.15381e-07	54	P00742	F10	Coagulation factor X	FA10_HUMAN	1	115.916	2.15916	Dengue	QC	NaN	NaN	NaN	41.7892	0.154002
Dengue / QC	_YTTFEYPNTISFSC[Carbamidomethyl (C)]NTGFYLNGADSAK_	P02749	0.804632	0.804632	2.91392e-07	6.16301e-07	138	P02749	APOH	Beta-2-glycoprotein 1	APOH_HUMAN	1	74.67	1.7467	Dengue	QC	NaN	NaN	NaN	57.5015	0.12788
Dengue / QC	_KIKGVISIPR_	P04114	1.38655	1.38655	2.99701e-07	6.31605e-07	72	P04114	APOB	Apolipoprotein B-100	APOB_HUMAN	1	161.452	2.61452	Dengue	QC	NaN	NaN	NaN	33.3986	0.229984
Dengue / QC	_AWGESTPLANKPGK_	A0A0A0MRJ7;P12259	0.528232	0.528232	3.00925e-07	6.33956e-07	96	A0A0A0MRJ7;P12259	F5	Coagulation factor V	A0A0A0MRJ7_HUMAN;FA5_HUMAN	1	44.216	1.44216	Dengue	QC	NaN	NaN	NaN	60.0502	0.124495
Dengue / QC	_ASSIIDELFQDRFFTREPQDTYHYLPFSLPHR_	P10909;P10909-2;P10909-4;P10909-5	0.664429	0.664429	3.02258e-07	6.36081e-07	156	P10909;P10909-2;P10909-4;P10909-5	CLU	Clusterin;Isoform 2 of Clusterin;Isoform 4 of Clusterin;Isoform 5 of Clusterin	CLUS_HUMAN	1	58.4941	1.58494	Dengue	QC	NaN	NaN	NaN	100.955	0.114106
Dengue / QC	_FLLKAEPLAFTFSHDYK_	P04114	1.20599	1.20599	3.08599e-07	6.47805e-07	34	P04114	APOB	Apolipoprotein B-100	APOB_HUMAN	1	130.696	2.30696	Dengue	QC	NaN	NaN	NaN	28.0064	0.155877
Dengue / QC	_TSNFNAAISLK_	P02748	-0.436561	0.436561	3.30846e-07	6.90807e-07	176	P02748	C9	Complement component C9	CO9_HUMAN	1	-26.1106	0.738894	Dengue	QC	NaN	NaN	NaN	84.6427	0.0780574
Dengue / QC	_DDSK[Carboxy]SIAYLQMNSLK_	A0A0A0MS15	-0.012112	0.012112	3.30821e-07	6.90807e-07	44	A0A0A0MS15	IGHV3-49	Immunoglobulin heavy variable 3-49	HV349_HUMAN	1	-0.836025	0.99164	Dengue	QC	NaN	NaN	NaN	17.6353	0.514949
Dengue / QC	_FM[Oxidation (M)]QAVTGWK_	P01019	-0.971959	0.971959	3.3297e-07	6.94504e-07	46	P01019	AGT	Angiotensinogen	ANGT_HUMAN	1	-49.0187	0.509813	Dengue	QC	NaN	NaN	NaN	21.9554	0.390417
Dengue / QC	_KLISVDTEHSNIYLQNGPDRIGR_	P00450	0.952643	0.952643	3.34924e-07	6.98085e-07	124	P00450	CP	Ceruloplasmin	CERU_HUMAN	1	93.5416	1.93542	Dengue	QC	NaN	NaN	NaN	81.582	0.135627
Dengue / QC	_IRITDNMFC[Carbamidomethyl (C)]AGYKPDEGK_	P00734	0.722906	0.722906	3.44392e-07	7.16803e-07	102	P00734	F2	Prothrombin	THRB_HUMAN	1	65.0503	1.6505	Dengue	QC	NaN	NaN	NaN	86.3811	0.11958
Dengue / QC	_C[Carbamidomethyl (C)]AFSSQEPYFSYSGAFK_	E7ER44;P02788	1.16236	1.16236	3.47875e-07	7.23029e-07	28	E7ER44;P02788	LTF	Lactotransferrin	E7ER44_HUMAN;TRFL_HUMAN	1	123.823	2.23823	Dengue	QC	NaN	NaN	NaN	21.3083	0.173934
Dengue / QC	_VQQPDC[Carbamidomethyl (C)]R_	P0C0L5	0.596796	0.596796	3.50511e-07	7.27995e-07	112	P0C0L5	C4B	Complement C4-B	CO4B_HUMAN	1	51.2354	1.51235	Dengue	QC	NaN	NaN	NaN	53.4284	0.111361
Dengue / QC	_VYC[Carbamidomethyl (C)]DM[Oxidation (M)]NTENGGWTVIQNR_	P02675	2.31698	2.31698	3.51287e-07	7.29347e-07	38	P02675	FGB	Fibrinogen beta chain	FIBB_HUMAN	1	398.29	4.9829	Dengue	QC	NaN	NaN	NaN	9.0275	0.181827
Dengue / QC	_VLNYVDWIK_	B4DPQ0	0.535399	0.535399	3.53447e-07	7.33573e-07	74	B4DPQ0	C1R	Complement C1r subcomponent	B4DPQ0_HUMAN	1	44.9343	1.44934	Dengue	QC	NaN	NaN	NaN	61.8756	0.0913655
Dengue / QC	_NTLIIYLDKVSHSEDDC[Carbamidomethyl (C)]LAFK_	P01024	0.519755	0.519755	3.54493e-07	7.35485e-07	146	P01024	C3	Complement C3	CO3_HUMAN	1	43.3712	1.43371	Dengue	QC	NaN	NaN	NaN	123.125	0.10713
Dengue / QC	_QVFLYPEK_	P04114	0.864456	0.864456	3.5586e-07	7.37802e-07	34	P04114	APOB	Apolipoprotein B-100	APOB_HUMAN	1	82.0653	1.82065	Dengue	QC	NaN	NaN	NaN	28.1241	0.15238
Dengue / QC	_DSPSVWAAVPGK_	P07737	1.60696	1.60696	3.57699e-07	7.4083e-07	22	P07737	PFN1	Profilin-1	PROF1_HUMAN	1	204.61	3.0461	Dengue	QC	NaN	NaN	NaN	14.0058	0.148194
Dengue / QC	_SVLRPSQFGGQPC[Carbamidomethyl (C)]TAPLVAFQPC[Carbamidomethyl (C)]IPSKLC[Carbamidomethyl (C)]K_	P13671	1.31603	1.31603	3.57921e-07	7.4103e-07	88	P13671	C6	Complement component C6	CO6_HUMAN	1	148.98	2.4898	Dengue	QC	NaN	NaN	NaN	66.4113	0.221768
Dengue / QC	_TGDTIEFMC[Carbamidomethyl (C)]K_	Q92496;Q92496-2	1.33231	1.33231	3.59376e-07	7.43519e-07	38	Q92496;Q92496-2	CFHR4	Complement factor H-related protein 4;Isoform 2 of Complement factor H-related protein 4	FHR4_HUMAN	1	151.805	2.51805	Dengue	QC	NaN	NaN	NaN	26.0762	0.254507
Dengue / QC	_VTITADESTSTAYMELSSLR_	A0A0B4J2H0	0.819743	0.819743	3.62467e-07	7.49651e-07	106	A0A0B4J2H0	IGHV1-69D	Immunoglobulin heavy variable 1-69D	HV69D_HUMAN	1	76.5092	1.76509	Dengue	QC	NaN	NaN	NaN	92.3481	0.162819
Dengue / QC	_APNHAVVTR_	P02787	0.786032	0.786032	3.62976e-07	7.49912e-07	154	P02787	TF	Serotransferrin	TRFE_HUMAN	1	72.4326	1.72433	Dengue	QC	NaN	NaN	NaN	90.9411	0.141243
Dengue / QC	_NANFKFTDHLK_	P00738	2.28855	2.28855	3.65418e-07	7.54163e-07	88	P00738	HP	Haptoglobin	HPT_HUMAN	1	388.565	4.88565	Dengue	QC	NaN	NaN	NaN	62.0072	0.329697
Dengue / QC	_RLGVYELLLK_	Q14624	0.953007	0.953007	3.6902e-07	7.60755e-07	18	Q14624	ITIH4	Inter-alpha-trypsin inhibitor heavy chain H4	ITIH4_HUMAN	1	93.5904	1.9359	Dengue	QC	NaN	NaN	NaN	12.4892	0.121627
Dengue / QC	_AQLYIDC[Carbamidomethyl (C)]EK_	P07996	0.611977	0.611977	3.70899e-07	7.63867e-07	46	P07996	THBS1	Thrombospondin-1	TSP1_HUMAN	1	52.8352	1.52835	Dengue	QC	NaN	NaN	NaN	27.8226	0.15072
Dengue / QC	_GLASANVDFAFSLYKHLVALSPKK_	P08185	0.513887	0.513887	3.76122e-07	7.73542e-07	128	P08185	SERPINA6	Corticosteroid-binding globulin	CBG_HUMAN	1	42.7892	1.42789	Dengue	QC	NaN	NaN	NaN	90.1831	0.109536
Dengue / QC	_QLVEIEKVVLHPNYHQVDIGLIK_	P00739	0.967529	0.967529	3.79834e-07	7.80903e-07	106	P00739	HPR	Haptoglobin-related protein	HPTR_HUMAN	1	95.5489	1.95549	Dengue	QC	NaN	NaN	NaN	59.147	0.130416
Dengue / QC	_KGGVASGFKHVVPNEVVVQR_	P06396	0.86278	0.86278	3.81065e-07	7.8316e-07	94	P06396	GSN	Gelsolin	GELS_HUMAN	1	81.854	1.81854	Dengue	QC	NaN	NaN	NaN	23.9009	0.158939
Dengue / QC	_AIFYMNNPSR_	Q9UGM5	0.459278	0.459278	3.84139e-07	7.88376e-07	80	Q9UGM5	FETUB	Fetuin-B	FETUB_HUMAN	1	37.4853	1.37485	Dengue	QC	NaN	NaN	NaN	70.7768	0.0732366
Dengue / QC	_TRPHWC[Carbamidomethyl (C)]C[Carbamidomethyl (C)]TR_	Q16610	1.38101	1.38101	3.84019e-07	7.88376e-07	50	Q16610	ECM1	Extracellular matrix protein 1	ECM1_HUMAN	1	160.45	2.6045	Dengue	QC	NaN	NaN	NaN	43.7556	0.231233
Dengue / QC	_SGGRTEHPFTVEEFVLPK_	P01023	-0.448246	0.448246	3.85772e-07	7.91452e-07	176	P01023	A2M	Alpha-2-macroglobulin	A2MG_HUMAN	1	-26.7067	0.732933	Dengue	QC	NaN	NaN	NaN	62.1568	0.0821257
Dengue / QC	_LPGDIQVVPIGVGPNANVQELER_	P04275	0.682008	0.682008	3.85989e-07	7.91621e-07	110	P04275	VWF	von Willebrand factor	VWF_HUMAN	1	60.4371	1.60437	Dengue	QC	NaN	NaN	NaN	105.53	0.134654
Dengue / QC	_GGVASGFKHVVPNEVVVQR_	P06396	0.771401	0.771401	4.00342e-07	8.19343e-07	62	P06396	GSN	Gelsolin	GELS_HUMAN	1	70.6926	1.70693	Dengue	QC	NaN	NaN	NaN	55.5037	0.155831
Dengue / QC	_QTSPVSAMLVLVK_	Q12805;Q12805-2;Q12805-4	2.0866	2.0866	4.00481e-07	8.19344e-07	30	Q12805;Q12805-2;Q12805-4	EFEMP1	EGF-containing fibulin-like extracellular matrix protein 1;Isoform 2 of EGF-containing fibulin-like extracellular matrix protein 1;Isoform 4 of EGF-containing fibulin-like extracellular matrix protein 1	FBLN3_HUMAN	1	324.746	4.24746	Dengue	QC	NaN	NaN	NaN	20.5194	0.333384
Dengue / QC	_LALDNGGLAR_	Q14624	-0.383939	0.383939	4.03954e-07	8.25301e-07	176	Q14624	ITIH4	Inter-alpha-trypsin inhibitor heavy chain H4	ITIH4_HUMAN	1	-23.3657	0.766343	Dengue	QC	NaN	NaN	NaN	65.975	0.0651808
Dengue / QC	_KALQTEMAR_	P11226	1.30617	1.30617	4.13634e-07	8.42737e-07	30	P11226	MBL2	Mannose-binding protein C	MBL2_HUMAN	1	147.283	2.47283	Dengue	QC	NaN	NaN	NaN	21.9559	0.191179
Dengue / QC	_VTVSC[Carbamidomethyl (C)]SGGMSLEGPSAFLC[Carbamidomethyl (C)]GSSLK_	P10643	0.582952	0.582952	4.14619e-07	8.4445e-07	136	P10643	C7	Complement component C7	CO7_HUMAN	1	49.7911	1.49791	Dengue	QC	NaN	NaN	NaN	121.268	0.115016
Dengue / QC	_LVGGDNLC[Carbamidomethyl (C)]SGRLEVLHK_	O43866	1.41085	1.41085	4.19221e-07	8.53233e-07	62	O43866	CD5L	CD5 antigen-like	CD5L_HUMAN	1	165.894	2.65894	Dengue	QC	NaN	NaN	NaN	48.5914	0.17412
Dengue / QC	_EQLNLRESATITC[Carbamidomethyl (C)]LVTGFSPADVFVQWMQR_	P01871	0.826486	0.826486	4.19555e-07	8.53618e-07	22	P01871	IGHM	Immunoglobulin heavy constant mu	IGHM_HUMAN	1	77.3361	1.77336	Dengue	QC	NaN	NaN	NaN	10.1388	0.659784
Dengue / QC	_FRVVSMDENFHPLNELIPLVYIQDPKGNR_	P01023	1.69664	1.69664	4.21732e-07	8.57751e-07	88	P01023	A2M	Alpha-2-macroglobulin	A2MG_HUMAN	1	224.144	3.24144	Dengue	QC	NaN	NaN	NaN	71.194	0.232099
Dengue / QC	_EC[Carbamidomethyl (C)]SKLPLR_	P23142-4	1.67702	1.67702	4.39965e-07	8.93291e-07	18	P23142-4	FBLN1	Isoform C of Fibulin-1	FBLN1_HUMAN	1	219.766	3.19766	Dengue	QC	NaN	NaN	NaN	9.07313	0.173732
Dengue / QC	_TRRVDTVDPPYPR_	P04004	1.22033	1.22033	4.57009e-07	9.2566e-07	166	P04004	VTN	Vitronectin	VTNC_HUMAN	1	132.999	2.32999	Dengue	QC	NaN	NaN	NaN	155.851	0.200405
Dengue / QC	_C[Carbamidomethyl (C)]TSTGWIPAPR_	P08603	0.267324	0.267324	4.6423e-07	9.38993e-07	162	P08603	CFH	Complement factor H	CFAH_HUMAN	1	20.3573	1.20357	Dengue	QC	NaN	NaN	NaN	56.971	0.105847
Dengue / QC	_VVSVLTVLHQDWLNGKEYKC[Carbamidomethyl (C)]K_	P01857	2.57132	2.57132	4.74591e-07	9.58746e-07	18	P01857	IGHG1	Immunoglobulin heavy constant gamma 1	IGHG1_HUMAN	1	494.351	5.94351	Dengue	QC	NaN	NaN	NaN	12.2765	0.252721
Dengue / QC	_NNNEKDMALTAFVLISLQEAKDIC[Carbamidomethyl (C)]EEQVNSLPGSITK_	P01024	0.751098	0.751098	4.76295e-07	9.61414e-07	172	P01024	C3	Complement C3	CO3_HUMAN	1	68.3074	1.68307	Dengue	QC	NaN	NaN	NaN	84.112	0.117985
Dengue / QC	_AYIFIDEAHITQALIWLSQRQK_	P01023	1.15168	1.15168	4.7951e-07	9.67572e-07	84	P01023	A2M	Alpha-2-macroglobulin	A2MG_HUMAN	1	122.172	2.22172	Dengue	QC	NaN	NaN	NaN	51.5838	0.184096
Dengue / QC	_LFSLKPTSGPVLTVTLFGR_	O95497	2.21775	2.21775	4.86612e-07	9.80221e-07	28	O95497	VNN1	Pantetheinase	VNN1_HUMAN	1	365.167	4.65167	Dengue	QC	NaN	NaN	NaN	20.5079	0.290074
Dengue / QC	_FNKPFVFLM[Oxidation (M)]IEQNTKSPLFM[Oxidation (M)]GK_	P01009	1.02997	1.02997	4.98985e-07	1.00172e-06	20	P01009	SERPINA1	Alpha-1-antitrypsin	A1AT_HUMAN	1	104.199	2.04199	Dengue	QC	NaN	NaN	NaN	14.3184	0.184654
Dengue / QC	_SRLDTLAQEVALLKEQQALQTVC[Carbamidomethyl (C)]LK_	E9PHK0;P05452	0.940825	0.940825	5.02649e-07	1.00873e-06	36	E9PHK0;P05452	CLEC3B	Tetranectin	E9PHK0_HUMAN;TETN_HUMAN	1	91.9626	1.91963	Dengue	QC	NaN	NaN	NaN	17.3054	0.174586
Dengue / QC	_C[Carbamidomethyl (C)]KVSNKALPAPIEK_	P01857	1.75411	1.75411	5.15259e-07	1.03052e-06	24	P01857	IGHG1	Immunoglobulin heavy constant gamma 1	IGHG1_HUMAN	1	237.319	3.37319	Dengue	QC	NaN	NaN	NaN	15.7311	0.306113
Dengue / QC	_LFAC[Carbamidomethyl (C)]SNK_	P06396	0.58654	0.58654	5.18941e-07	1.03718e-06	128	P06396	GSN	Gelsolin	GELS_HUMAN	1	50.1641	1.50164	Dengue	QC	NaN	NaN	NaN	99.3559	0.117703
Dengue / QC	_C[Carbamidomethyl (C)]HTC[Carbamidomethyl (C)]QNGGTVILMDGK_	P02748	0.373403	0.373403	5.20298e-07	1.03954e-06	26	P02748	C9	Complement component C9	CO9_HUMAN	1	29.5405	1.2954	Dengue	QC	NaN	NaN	NaN	13.4736	0.260292
Dengue / QC	_QRAAC[Carbamidomethyl (C)]AQLNDFLQEYGTQGC[Carbamidomethyl (C)]QV_	P0C0L5	1.87407	1.87407	5.21253e-07	1.04109e-06	40	P0C0L5	C4B	Complement C4-B	CO4B_HUMAN	1	266.564	3.66564	Dengue	QC	NaN	NaN	NaN	29.2576	0.278922
Dengue / QC	_LASVSVSR_	Q9Y6R7	1.47613	1.47613	5.28449e-07	1.05475e-06	32	Q9Y6R7	FCGBP	IgGFc-binding protein	FCGBP_HUMAN	1	178.202	2.78202	Dengue	QC	NaN	NaN	NaN	22.6138	0.235932
Dengue / QC	_VVSVDENFRPR_	P20742	2.7289	2.7289	5.61637e-07	1.11871e-06	82	P20742	PZP	Pregnancy zone protein	PZP_HUMAN	1	562.948	6.62948	Dengue	QC	NaN	NaN	NaN	55.3115	0.437573
Dengue / QC	_ALTDMPQMR_	P02671	2.52085	2.52085	5.68996e-07	1.13145e-06	154	P02671	FGA	Fibrinogen alpha chain	FIBA_HUMAN	1	473.92	5.7392	Dengue	QC	NaN	NaN	NaN	129.505	0.43898
Dengue / QC	_ANRPFLVFIREVPLNTIIFMGR_	P01008	1.00799	1.00799	5.7537e-07	1.14336e-06	174	P01008	SERPINC1	Antithrombin-III	ANT3_HUMAN	1	101.111	2.01111	Dengue	QC	NaN	NaN	NaN	56.3241	0.135562
Dengue / QC	_ATVLNYLPK_	P01023	-0.47189	0.47189	5.80117e-07	1.1524e-06	172	P01023	A2M	Alpha-2-macroglobulin	A2MG_HUMAN	1	-27.898	0.72102	Dengue	QC	NaN	NaN	NaN	105.159	0.0827832
Dengue / QC	_THTC[Carbamidomethyl (C)]PPC[Carbamidomethyl (C)]PAPELLGGPSVFLFPPKPKDTLMISR_	P01857	2.31434	2.31434	5.84954e-07	1.16162e-06	70	P01857	IGHG1	Immunoglobulin heavy constant gamma 1	IGHG1_HUMAN	1	397.378	4.97378	Dengue	QC	NaN	NaN	NaN	57.0247	0.294801
Dengue / QC	_EKNVPLPVIAELPPK_	P01871	-0.68457	0.68457	5.85487e-07	1.16228e-06	152	P01871	IGHM	Immunoglobulin heavy constant mu	IGHM_HUMAN	1	-37.7809	0.622191	Dengue	QC	NaN	NaN	NaN	67.2289	0.114639
Dengue / QC	_VTISVDTSK_	P06331	-0.610323	0.610323	5.87467e-07	1.16582e-06	174	P06331	IGHV4-34	Immunoglobulin heavy variable 4-34	HV434_HUMAN	1	-34.495	0.65505	Dengue	QC	NaN	NaN	NaN	59.0614	0.114136
Dengue / QC	_TPC[Carbamidomethyl (C)]QQELDQVLER_	P18065	1.10849	1.10849	5.94132e-07	1.17825e-06	24	P18065	IGFBP2	Insulin-like growth factor-binding protein 2	IBP2_HUMAN	1	115.62	2.1562	Dengue	QC	NaN	NaN	NaN	18.8365	0.146823
Dengue / QC	_KVLLDGVQNPRAEDLVGK_	P01024	1.01582	1.01582	6.0058e-07	1.18824e-06	126	P01024	C3	Complement C3	CO3_HUMAN	1	102.206	2.02206	Dengue	QC	NaN	NaN	NaN	114.101	0.167338
Dengue / QC	_MRPWKDPPSDLLLLK_	A0A0A0MRJ7;P12259	0.695939	0.695939	6.00864e-07	1.1884e-06	38	A0A0A0MRJ7;P12259	F5	Coagulation factor V	A0A0A0MRJ7_HUMAN;FA5_HUMAN	1	61.9938	1.61994	Dengue	QC	NaN	NaN	NaN	33.5201	0.146463
Dengue / QC	_WTPPRAQITGYRLTVGLTR_	P02751;P02751-15;P02751-3;P02751-7	1.67251	1.67251	6.1949e-07	1.22359e-06	50	P02751;P02751-15;P02751-3;P02751-7	FN1	Fibronectin;Isoform 15 of Fibronectin;Isoform 3 of Fibronectin;Isoform 7 of Fibronectin	FINC_HUMAN	1	218.768	3.18768	Dengue	QC	NaN	NaN	NaN	44.5706	0.249879
Dengue / QC	_FFTREPQDTYHYLPFSLPHR_	P10909;P10909-2;P10909-4;P10909-5	0.490464	0.490464	6.24922e-07	1.23349e-06	104	P10909;P10909-2;P10909-4;P10909-5	CLU	Clusterin;Isoform 2 of Clusterin;Isoform 4 of Clusterin;Isoform 5 of Clusterin	CLUS_HUMAN	1	40.4896	1.4049	Dengue	QC	NaN	NaN	NaN	97.06	0.0850087
Dengue / QC	_VKIDQTVEELR_	P06727	1.42505	1.42505	6.29777e-07	1.24266e-06	24	P06727	APOA4	Apolipoprotein A-IV	APOA4_HUMAN	1	168.524	2.68524	Dengue	QC	NaN	NaN	NaN	15.2602	0.201255
Dengue / QC	_HSTIFENLANKADR_	P02787	-0.48248	0.48248	6.35719e-07	1.25396e-06	176	P02787	TF	Serotransferrin	TRFE_HUMAN	1	-28.4254	0.715746	Dengue	QC	NaN	NaN	NaN	52.2728	0.0886497
Dengue / QC	_ANSFLGEK_	A0A140TA49	0.292652	0.292652	6.48478e-07	1.27699e-06	126	A0A140TA49	C4A	Complement C4-A	A0A140TA49_HUMAN	1	22.489	1.22489	Dengue	QC	NaN	NaN	NaN	66.1268	0.101693
Dengue / QC	_SLEVTFTPVIEDIGK_	P19320	0.629855	0.629855	6.51886e-07	1.28284e-06	44	P19320	VCAM1	Vascular cell adhesion protein 1	VCAM1_HUMAN	1	54.741	1.54741	Dengue	QC	NaN	NaN	NaN	36.9602	0.142505
Dengue / QC	_AVVFLEPQWYSVLEKDSVTLK_	A0A087WZR4	2.10705	2.10705	6.54106e-07	1.28678e-06	36	A0A087WZR4	FCGR3B	Low affinity immunoglobulin gamma Fc region receptor III-B	A0A087WZR4_HUMAN	1	330.809	4.30809	Dengue	QC	NaN	NaN	NaN	20.3941	0.235102
Dengue / QC	_YLDSTFTK_	A0A0A0MRJ7;P12259	0.625859	0.625859	6.68194e-07	1.31099e-06	106	A0A0A0MRJ7;P12259	F5	Coagulation factor V	A0A0A0MRJ7_HUMAN;FA5_HUMAN	1	54.3129	1.54313	Dengue	QC	NaN	NaN	NaN	78.4584	0.128598
Dengue / QC	_APQLRETLLQDFR_	P02760	1.35511	1.35511	6.68129e-07	1.31099e-06	48	P02760	AMBP	Protein AMBP	AMBP_HUMAN	1	155.817	2.55817	Dengue	QC	NaN	NaN	NaN	25.7598	0.16644
Dengue / QC	_VGSPNAAVLWLWSSHNRVNAR_	O00391	0.918074	0.918074	6.75469e-07	1.32394e-06	62	O00391	QSOX1	Sulfhydryl oxidase 1	QSOX1_HUMAN	1	88.9591	1.88959	Dengue	QC	NaN	NaN	NaN	51.811	0.170507
Dengue / QC	_YWC[Carbamidomethyl (C)]NDGKTPGAVNAC[Carbamidomethyl (C)]HLSC[Carbamidomethyl (C)]SALLQDNIADAVAC[Carbamidomethyl (C)]AK_	P61626	0.597145	0.597145	6.77844e-07	1.32815e-06	38	P61626	LYZ	Lysozyme C	LYSC_HUMAN	1	51.272	1.51272	Dengue	QC	NaN	NaN	NaN	32.9894	0.157031
Dengue / QC	_QAPGQELGWM[Oxidation (M)]GR_	A0A075B7D0	0.581722	0.581722	6.8161e-07	1.33508e-06	100	A0A075B7D0	IGHV1OR15-1	Immunoglobulin heavy variable 1/OR15-1 (non-functional) (Fragment)	A0A075B7D0_HUMAN	1	49.6634	1.49663	Dengue	QC	NaN	NaN	NaN	87.1239	0.103356
Dengue / QC	_SGLSTGWTQLSK_	P04217	-0.422492	0.422492	6.89624e-07	1.34899e-06	176	P04217	A1BG	Alpha-1B-glycoprotein	A1BG_HUMAN	1	-25.3865	0.746135	Dengue	QC	NaN	NaN	NaN	51.5542	0.0725773
Dengue / QC	_YASQSFSGVPSR_	A0A0C4DH24	-0.696013	0.696013	6.94268e-07	1.35717e-06	148	A0A0C4DH24	IGKV6-21	Immunoglobulin kappa variable 6-21	KV621_HUMAN	1	-38.2724	0.617276	Dengue	QC	NaN	NaN	NaN	109.904	0.125269
Dengue / QC	_TPC[Carbamidomethyl (C)]EEILVK_	P21333;P21333-2;Q5HY54	0.568534	0.568534	7.05923e-07	1.37858e-06	78	P21333;P21333-2;Q5HY54	FLNA	Filamin-A;Isoform 2 of Filamin-A;Filamin-A	FLNA_HUMAN;FLNA_HUMAN;Q5HY54_HUMAN	1	48.3016	1.48302	Dengue	QC	NaN	NaN	NaN	64.3803	0.109009
Dengue / QC	_YISKYELDK_	P01024	-0.324104	0.324104	7.06653e-07	1.37954e-06	166	P01024	C3	Complement C3	CO3_HUMAN	1	-20.1206	0.798794	Dengue	QC	NaN	NaN	NaN	112.211	0.0755887
Dengue / QC	_GLLIFDASSSWGPQMSASVHLDSK_	P04114	1.77921	1.77921	7.07707e-07	1.38114e-06	30	P04114	APOB	Apolipoprotein B-100	APOB_HUMAN	1	243.239	3.43239	Dengue	QC	NaN	NaN	NaN	14.7865	0.310581
Dengue / QC	_GVALHRPDVYLLPPAR_	P01871	-0.58453	0.58453	7.1003e-07	1.38476e-06	176	P01871	IGHM	Immunoglobulin heavy constant mu	IGHM_HUMAN	1	-33.3133	0.666867	Dengue	QC	NaN	NaN	NaN	50.457	0.0998464
Dengue / QC	_YYTYLIMNK_	P01024	-0.406515	0.406515	7.22387e-07	1.40699e-06	172	P01024	C3	Complement C3	CO3_HUMAN	1	-24.5556	0.754444	Dengue	QC	NaN	NaN	NaN	83.6156	0.0761226
Dengue / QC	_VKEGMNIVEAMER_	P62937	0.54407	0.54407	7.27052e-07	1.41467e-06	78	P62937	PPIA	Peptidyl-prolyl cis-trans isomerase A	PPIA_HUMAN	1	45.808	1.45808	Dengue	QC	NaN	NaN	NaN	73.2908	0.0743652
Dengue / QC	_LPSNVVK_	P20742	1.25838	1.25838	7.28605e-07	1.41723e-06	34	P20742	PZP	Pregnancy zone protein	PZP_HUMAN	1	139.227	2.39227	Dengue	QC	NaN	NaN	NaN	12.354	0.12948
Dengue / QC	_LLIYYDDLLPSGVSDRFSGSK_	A0A0B4J1U3	1.07813	1.07813	7.32219e-07	1.42331e-06	84	A0A0B4J1U3	IGLV1-36	Immunoglobulin lambda variable 1-36	LV136_HUMAN	1	111.129	2.11129	Dengue	QC	NaN	NaN	NaN	52.2882	0.19078
Dengue / QC	_EC[Carbamidomethyl (C)]VGFEAVQEVPVGLVQPASATLYDYYNPER_	P0C0L5	0.4692	0.4692	7.47899e-07	1.45236e-06	162	P0C0L5	C4B	Complement C4-B	CO4B_HUMAN	1	38.4342	1.38434	Dengue	QC	NaN	NaN	NaN	118.358	0.102563
Dengue / QC	_LLGMETMAWQEIR_	B4E1Z4	0.70182	0.70182	7.54924e-07	1.46503e-06	68	B4E1Z4	NaN	cDNA FLJ55673, highly similar to Complement factor B (EC 3.4.21.47)	B4E1Z4_HUMAN	1	62.6555	1.62656	Dengue	QC	NaN	NaN	NaN	58.2938	0.126751
Dengue / QC	_GRFIISR_	A0A0C4DH35	1.19858	1.19858	7.65262e-07	1.48265e-06	112	A0A0C4DH35	IGHV3-35	Immunoglobulin heavy variable 3-35 (non-functional) (Fragment)	A0A0C4DH35_HUMAN	1	129.514	2.29514	Dengue	QC	NaN	NaN	NaN	96.5329	0.216077
Dengue / QC	_GQPLSPEK_	P01871	-0.646241	0.646241	7.68433e-07	1.4883e-06	170	P01871	IGHM	Immunoglobulin heavy constant mu	IGHM_HUMAN	1	-36.1057	0.638943	Dengue	QC	NaN	NaN	NaN	58.0676	0.11445
Dengue / QC	_NAEELKAR_	P06727	0.874194	0.874194	7.8715e-07	1.52205e-06	66	P06727	APOA4	Apolipoprotein A-IV	APOA4_HUMAN	1	83.2984	1.83298	Dengue	QC	NaN	NaN	NaN	45.9622	0.194886
Dengue / QC	_KEEYGHNEVVEYDC[Carbamidomethyl (C)]NPNFIINGPK_	Q9BXR6	0.948697	0.948697	7.93068e-07	1.53148e-06	56	Q9BXR6	CFHR5	Complement factor H-related protein 5	FHR5_HUMAN	1	93.0129	1.93013	Dengue	QC	NaN	NaN	NaN	44.6781	0.158035
Dengue / QC	_KGGVASGFK_	P06396	0.826821	0.826821	8.07221e-07	1.55779e-06	80	P06396	GSN	Gelsolin	GELS_HUMAN	1	77.3772	1.77377	Dengue	QC	NaN	NaN	NaN	56.3387	0.161311
Dengue / QC	_GMADQDGLKPTIDKPSEDSPPLEM[Oxidation (M)]LGPR_	P19827	0.680232	0.680232	8.168e-07	1.57472e-06	58	P19827	ITIH1	Inter-alpha-trypsin inhibitor heavy chain H1	ITIH1_HUMAN	1	60.2398	1.6024	Dengue	QC	NaN	NaN	NaN	39.6835	0.0991172
Dengue / QC	_YDYC[Carbamidomethyl (C)]DILEC[Carbamidomethyl (C)]EEEC[Carbamidomethyl (C)]M[Oxidation (M)]HC[Carbamidomethyl (C)]SGENYDGK_	P00747	1.19027	1.19027	8.18582e-07	1.57712e-06	22	P00747	PLG	Plasminogen	PLMN_HUMAN	1	128.195	2.28195	Dengue	QC	NaN	NaN	NaN	14.496	0.177263
Dengue / QC	_IEPSQAK_	P48740	0.50005	0.50005	8.19891e-07	1.57913e-06	24	P48740	MASP1	Mannan-binding lectin serine protease 1	MASP1_HUMAN	1	41.4262	1.41426	Dengue	QC	NaN	NaN	NaN	16.62	0.124572
Dengue / QC	_PGFTIVGPNSVQC[Carbamidomethyl (C)]YHFGLSPDLPIC[Carbamidomethyl (C)]K_	P08603	0.687817	0.687817	8.22503e-07	1.58364e-06	60	P08603	CFH	Complement factor H	CFAH_HUMAN	1	61.0845	1.61084	Dengue	QC	NaN	NaN	NaN	25.5922	0.177891
Dengue / QC	_DTEEEDFHVDQATTVKVPMMK_	A0A024R6I7	0.530934	0.530934	8.22911e-07	1.58391e-06	120	A0A024R6I7	SERPINA1	Alpha-1-antitrypsin	A0A024R6I7_HUMAN	1	44.4864	1.44486	Dengue	QC	NaN	NaN	NaN	98.4138	0.111205
Dengue / QC	_RNPFVFAPTLLTVAVHFEEVAK_	P43652	0.857655	0.857655	8.36423e-07	1.60676e-06	124	P43652	AFM	Afamin	AFAM_HUMAN	1	81.209	1.81209	Dengue	QC	NaN	NaN	NaN	51.677	0.157835
Dengue / QC	_IAYKNWETEITAQPDGGKTENC[Carbamidomethyl (C)]AVLSGAANGK_	E9PHK0;P05452	0.851776	0.851776	8.44493e-07	1.62121e-06	90	E9PHK0;P05452	CLEC3B	Tetranectin	E9PHK0_HUMAN;TETN_HUMAN	1	80.4722	1.80472	Dengue	QC	NaN	NaN	NaN	63.6617	0.125051
Dengue / QC	_GNPAVSYVR_	Q9Y6R7	0.98158	0.98158	8.47613e-07	1.62613e-06	106	Q9Y6R7	FCGBP	IgGFc-binding protein	FCGBP_HUMAN	1	97.4626	1.97463	Dengue	QC	NaN	NaN	NaN	94.9305	0.190877
Dengue / QC	_EC[Carbamidomethyl (C)]SKLPLRITYYHLSFPTNIQAPAVVFR_	P23142-4	1.20999	1.20999	8.68505e-07	1.6635e-06	62	P23142-4	FBLN1	Isoform C of Fibulin-1	FBLN1_HUMAN	1	131.335	2.31335	Dengue	QC	NaN	NaN	NaN	57.1752	0.212975
Dengue / QC	_ALSGFSLQSC[Carbamidomethyl (C)]R_	P03951	1.11747	1.11747	8.74908e-07	1.67468e-06	52	P03951	F11	Coagulation factor XI	FA11_HUMAN	1	116.966	2.16966	Dengue	QC	NaN	NaN	NaN	23.7147	0.153996
Dengue / QC	_LMIYDVSK_	P01706	-0.738919	0.738919	8.76494e-07	1.67717e-06	166	P01706	IGLV2-11	Immunoglobulin lambda variable 2-11	LV211_HUMAN	1	-40.0812	0.599188	Dengue	QC	NaN	NaN	NaN	117.264	0.140268
Dengue / QC	_RPVKLLSGGNTLHLVSTTK_	P04114	0.727796	0.727796	8.85714e-07	1.69371e-06	80	P04114	APOB	Apolipoprotein B-100	APOB_HUMAN	1	65.6108	1.65611	Dengue	QC	NaN	NaN	NaN	73.0392	0.152708
Dengue / QC	_TTEYYPNGGLTR_	P08519	1.9854	1.9854	8.92946e-07	1.70587e-06	116	P08519	LPA	Apolipoprotein(a)	APOA_HUMAN	1	295.973	3.95973	Dengue	QC	NaN	NaN	NaN	91.6449	0.275151
Dengue / QC	_SYTVAIAGYALAQMGRLKGPLLNK_	P01024	0.616825	0.616825	8.93355e-07	1.7061e-06	124	P01024	C3	Complement C3	CO3_HUMAN	1	53.3496	1.5335	Dengue	QC	NaN	NaN	NaN	63.9348	0.100477
Dengue / QC	_RQLTPYAQR_	P06727	0.5513	0.5513	8.99792e-07	1.71784e-06	42	P06727	APOA4	Apolipoprotein A-IV	APOA4_HUMAN	1	46.5405	1.46541	Dengue	QC	NaN	NaN	NaN	24.0949	0.117747
Dengue / QC	_C[Carbamidomethyl (C)]C[Carbamidomethyl (C)]EDGMR_	P01024	0.732719	0.732719	9.14495e-07	1.74308e-06	148	P01024	C3	Complement C3	CO3_HUMAN	1	66.1768	1.66177	Dengue	QC	NaN	NaN	NaN	44.0327	0.117374
Dengue / QC	_QIGSVYR_	P04196	-0.598621	0.598621	9.2231e-07	1.75684e-06	132	P04196	HRG	Histidine-rich glycoprotein	HRG_HUMAN	1	-33.9615	0.660385	Dengue	QC	NaN	NaN	NaN	59.6964	0.0995635
Dengue / QC	_RNPADPQRIPSNPSHR_	Q12805;Q12805-2;Q12805-4	2.3706	2.3706	9.24193e-07	1.75872e-06	38	Q12805;Q12805-2;Q12805-4	EFEMP1	EGF-containing fibulin-like extracellular matrix protein 1;Isoform 2 of EGF-containing fibulin-like extracellular matrix protein 1;Isoform 4 of EGF-containing fibulin-like extracellular matrix protein 1	FBLN3_HUMAN	1	417.155	5.17155	Dengue	QC	NaN	NaN	NaN	12.1526	0.242049
Dengue / QC	_EKAEAQAQYSAAVAK_	Q14624	-0.739715	0.739715	9.34481e-07	1.77714e-06	176	Q14624	ITIH4	Inter-alpha-trypsin inhibitor heavy chain H4	ITIH4_HUMAN	1	-40.1142	0.598858	Dengue	QC	NaN	NaN	NaN	42.1245	0.140781
Dengue / QC	_GGGAGFISGLSYLELDNPAGNK_	P10643	0.784914	0.784914	9.48173e-07	1.80144e-06	92	P10643	C7	Complement component C7	CO7_HUMAN	1	72.299	1.72299	Dengue	QC	NaN	NaN	NaN	78.0812	0.163413
Dengue / QC	_NIQEYLSILTDPDGKGKEK_	P04114	0.824713	0.824713	9.59927e-07	1.82142e-06	62	P04114	APOB	Apolipoprotein B-100	APOB_HUMAN	1	77.1183	1.77118	Dengue	QC	NaN	NaN	NaN	54.1243	0.14475
Dengue / QC	_QEPERNEC[Carbamidomethyl (C)]FLQHK_	P02768	-0.362447	0.362447	9.62495e-07	1.8257e-06	174	P02768	ALB	Serum albumin	ALBU_HUMAN	1	-22.2156	0.777844	Dengue	QC	NaN	NaN	NaN	59.4178	0.082354
Dengue / QC	_IEDLPTMVTLGNSFLHK_	P04275	0.447972	0.447972	9.82071e-07	1.85804e-06	122	P04275	VWF	von Willebrand factor	VWF_HUMAN	1	36.4121	1.36412	Dengue	QC	NaN	NaN	NaN	114.851	0.110322
Dengue / QC	_C[Carbamidomethyl (C)]DPVDQC[Carbamidomethyl (C)]QDSETGTFYQIGDSWEK_	P02751;P02751-15;P02751-3;P02751-7	0.820455	0.820455	9.8199e-07	1.85804e-06	118	P02751;P02751-15;P02751-3;P02751-7	FN1	Fibronectin;Isoform 15 of Fibronectin;Isoform 3 of Fibronectin;Isoform 7 of Fibronectin	FINC_HUMAN	1	76.5963	1.76596	Dengue	QC	NaN	NaN	NaN	109.943	0.1423
Dengue / QC	_SALVLQYLRVPLVDR_	P00740	1.67988	1.67988	9.91812e-07	1.87466e-06	36	P00740	F9	Coagulation factor IX	FA9_HUMAN	1	220.402	3.20402	Dengue	QC	NaN	NaN	NaN	27.8138	0.145149
Dengue / QC	_FAVLQENVAWGNGR_	Q9Y6R7	1.07214	1.07214	9.96476e-07	1.88287e-06	50	Q9Y6R7	FCGBP	IgGFc-binding protein	FCGBP_HUMAN	1	110.255	2.10255	Dengue	QC	NaN	NaN	NaN	43.4843	0.217524
Dengue / QC	_ADQVC[Carbamidomethyl (C)]INLR_	Q12805;Q12805-2;Q12805-4	0.457218	0.457218	1.01238e-06	1.90986e-06	166	Q12805;Q12805-2;Q12805-4	EFEMP1	EGF-containing fibulin-like extracellular matrix protein 1;Isoform 2 of EGF-containing fibulin-like extracellular matrix protein 1;Isoform 4 of EGF-containing fibulin-like extracellular matrix protein 1	FBLN3_HUMAN	1	37.2892	1.37289	Dengue	QC	NaN	NaN	NaN	157.453	0.111695
Dengue / QC	_ENQLEVLEVSWLHGLK_	P02750	0.510939	0.510939	1.01873e-06	1.9206e-06	136	P02750	LRG1	Leucine-rich alpha-2-glycoprotein	A2GL_HUMAN	1	42.4977	1.42498	Dengue	QC	NaN	NaN	NaN	100.12	0.123575
Dengue / QC	_LLC[Carbamidomethyl (C)]QC[Carbamidomethyl (C)]LGFGSGHFR_	P02751;P02751-15;P02751-3;P02751-7	0.481419	0.481419	1.04027e-06	1.95744e-06	124	P02751;P02751-15;P02751-3;P02751-7	FN1	Fibronectin;Isoform 15 of Fibronectin;Isoform 3 of Fibronectin;Isoform 7 of Fibronectin	FINC_HUMAN	1	39.6117	1.39612	Dengue	QC	NaN	NaN	NaN	114.39	0.0963541
Dengue / QC	_WVMVPMMSLHHLTIPYFR_	P01011	0.500081	0.500081	1.04026e-06	1.95744e-06	148	P01011	SERPINA3	Alpha-1-antichymotrypsin	AACT_HUMAN	1	41.4293	1.41429	Dengue	QC	NaN	NaN	NaN	97.6192	0.104777
Dengue / QC	_YNILPEKEDSPFALK_	P20742	2.05229	2.05229	1.04019e-06	1.95744e-06	114	P20742	PZP	Pregnancy zone protein	PZP_HUMAN	1	314.764	4.14764	Dengue	QC	NaN	NaN	NaN	78.3051	0.338766
Dengue / QC	_YFKPGMPFDLMVFVTNPDGSPAYRVPVAVQGEDTVQSLTQGDGVAK_	P01024	0.638834	0.638834	1.05221e-06	1.97865e-06	176	P01024	C3	Complement C3	CO3_HUMAN	1	55.707	1.55707	Dengue	QC	NaN	NaN	NaN	59.2833	0.105777
Dengue / QC	_REQPGVYTK_	H0YAC1;P03952	0.437541	0.437541	1.05438e-06	1.9821e-06	160	H0YAC1;P03952	KLKB1	Plasma kallikrein (Fragment);Plasma kallikrein	H0YAC1_HUMAN;KLKB1_HUMAN	1	35.4294	1.35429	Dengue	QC	NaN	NaN	NaN	55.801	0.0805503
Dengue / QC	_HPDEAAFFDTASTGK_	P02671	1.67653	1.67653	1.06653e-06	2.0043e-06	154	P02671	FGA	Fibrinogen alpha chain	FIBA_HUMAN	1	219.659	3.19659	Dengue	QC	NaN	NaN	NaN	124.477	0.301421
Dengue / QC	_GSRPQGPFLIADKWPALPR_	P14780	3.32554	3.32554	1.06926e-06	2.00879e-06	20	P14780	MMP9	Matrix metalloproteinase-9	MMP9_HUMAN	1	902.505	10.0251	Dengue	QC	NaN	NaN	NaN	12.3193	0.311556
Dengue / QC	_NLSVEDAAR_	P04040	1.67445	1.67445	1.07558e-06	2.01872e-06	28	P04040	CAT	Catalase	CATA_HUMAN	1	219.197	3.19197	Dengue	QC	NaN	NaN	NaN	19.4899	0.268842
Dengue / QC	_AYSDMREANYIGSDK_	P0DJI8	1.17823	1.17823	1.08243e-06	2.03093e-06	44	P0DJI8	SAA1	Serum amyloid A-1 protein	SAA1_HUMAN	1	126.299	2.26299	Dengue	QC	NaN	NaN	NaN	36.5364	0.20362
Dengue / QC	_GLEWVGR_	A0A0B4J1Y9	-0.374311	0.374311	1.10176e-06	2.06457e-06	176	A0A0B4J1Y9	IGHV3-72	Immunoglobulin heavy variable 3-72	HV372_HUMAN	1	-22.8526	0.771474	Dengue	QC	NaN	NaN	NaN	71.161	0.0751026
Dengue / QC	_EGVYTVFAPTNEAFR_	Q15582	0.788332	0.788332	1.10151e-06	2.06457e-06	50	Q15582	TGFBI	Transforming growth factor-beta-induced protein ig-h3	BGH3_HUMAN	1	72.7076	1.72708	Dengue	QC	NaN	NaN	NaN	40.9133	0.138784
Dengue / QC	_EPAAQAPVK_	A0A0A0MS09;P01880;P01880-2	2.13273	2.13273	1.11493e-06	2.08527e-06	24	A0A0A0MS09;P01880;P01880-2	IGHD	Immunoglobulin heavy constant delta (Fragment);Immunoglobulin heavy constant delta;Isoform 2 of Immunoglobulin heavy constant delta	A0A0A0MS09_HUMAN;IGHD_HUMAN;IGHD_HUMAN	1	338.545	4.38545	Dengue	QC	NaN	NaN	NaN	12.1082	0.274261
Dengue / QC	_LLFDGDAHLLMSIPSPFR_	Q9Y6R7	1.15573	1.15573	1.11835e-06	2.09099e-06	28	Q9Y6R7	FCGBP	IgGFc-binding protein	FCGBP_HUMAN	1	122.796	2.22796	Dengue	QC	NaN	NaN	NaN	11.5038	0.327843
Dengue / QC	_SHKSYSC[Carbamidomethyl (C)]QVTHEGSTVEK_	P0DOY3	1.26079	1.26079	1.13556e-06	2.12182e-06	154	P0DOY3	IGLC3	Immunoglobulin lambda constant 3	IGLC3_HUMAN	1	139.627	2.39627	Dengue	QC	NaN	NaN	NaN	143.453	0.263209
Dengue / QC	_DTDMDGVGDQC[Carbamidomethyl (C)]DNC[Carbamidomethyl (C)]PLEHNPDQLDSDSDR_	P07996	0.644621	0.644621	1.13665e-06	2.12318e-06	24	P07996	THBS1	Thrombospondin-1	TSP1_HUMAN	1	56.3328	1.56333	Dengue	QC	NaN	NaN	NaN	8.65684	0.141431
Dengue / QC	_LLIYDASNLETGVPSR_	P01593;P01594	-0.737905	0.737905	1.13863e-06	2.12621e-06	176	P01593;P01594	IGKV1D-33;IGKV1-33	Immunoglobulin kappa variable 1D-33;Immunoglobulin kappa variable 1-33	KVD33_HUMAN;KV133_HUMAN	1	-40.0391	0.599609	Dengue	QC	NaN	NaN	NaN	57.382	0.120704
Dengue / QC	_WLQGSQELPREK_	A0A0G2JMB2	-0.605001	0.605001	1.15628e-06	2.15781e-06	176	A0A0G2JMB2	IGHA2	Immunoglobulin heavy constant alpha 2 (Fragment)	A0A0G2JMB2_HUMAN	1	-34.2529	0.657471	Dengue	QC	NaN	NaN	NaN	77.9597	0.115256
Dengue / QC	_VSNKGLPAPIEK_	P01859	1.49927	1.49927	1.16739e-06	2.17508e-06	176	P01859	IGHG2	Immunoglobulin heavy constant gamma 2	IGHG2_HUMAN	1	182.699	2.82699	Dengue	QC	NaN	NaN	NaN	152.533	0.259885
Dengue / QC	_MNFKQELNGNTK_	P04114	0.957925	0.957925	1.1672e-06	2.17508e-06	106	P04114	APOB	Apolipoprotein B-100	APOB_HUMAN	1	94.2514	1.94251	Dengue	QC	NaN	NaN	NaN	63.9269	0.127149
Dengue / QC	_LTSLSDRYVSHFETEGPHVLLYFDSVPTSR_	P0C0L5	0.428696	0.428696	1.17703e-06	2.19028e-06	164	P0C0L5	C4B	Complement C4-B	CO4B_HUMAN	1	34.6016	1.34602	Dengue	QC	NaN	NaN	NaN	126.212	0.101954
Dengue / QC	_DTANLFPQTSLTLHM[Oxidation (M)]WPDTEGTFNVEC[Carbamidomethyl (C)]LTTDHYTGGMK_	P00450	0.424452	0.424452	1.19969e-06	2.23032e-06	92	P00450	CP	Ceruloplasmin	CERU_HUMAN	1	34.2062	1.34206	Dengue	QC	NaN	NaN	NaN	61.5141	0.20631
Dengue / QC	_GRYEFHSLNIHSC[Carbamidomethyl (C)]ELLHSALRPVPGQGLSLSISDSSIR_	P18428	1.27345	1.27345	1.21669e-06	2.25836e-06	40	P18428	LBP	Lipopolysaccharide-binding protein	LBP_HUMAN	1	141.74	2.4174	Dengue	QC	NaN	NaN	NaN	28.7906	0.175329
Dengue / QC	_EAC[Carbamidomethyl (C)]NAWLQKR_	Q9NZP8	2.29567	2.29567	1.23576e-06	2.2887e-06	40	Q9NZP8	C1RL	Complement C1r subcomponent-like protein	C1RL_HUMAN	1	390.983	4.90983	Dengue	QC	NaN	NaN	NaN	19.87	0.49701
Dengue / QC	_VPMM[Oxidation (M)]NSK_	P05155;P05155-3	-1.3229	1.3229	1.23867e-06	2.29337e-06	36	P05155;P05155-3	SERPING1	Plasma protease C1 inhibitor;Isoform 3 of Plasma protease C1 inhibitor	IC1_HUMAN	1	-60.027	0.39973	Dengue	QC	NaN	NaN	NaN	10.6198	0.112446
Dengue / QC	_GFQVVVTLR_	P09871	0.733845	0.733845	1.24071e-06	2.29643e-06	116	P09871	C1S	Complement C1s subcomponent	C1S_HUMAN	1	66.3066	1.66307	Dengue	QC	NaN	NaN	NaN	70.6727	0.140146
Dengue / QC	_LKFIIPSPK_	P04114	0.365487	0.365487	1.25199e-06	2.31584e-06	66	P04114	APOB	Apolipoprotein B-100	APOB_HUMAN	1	28.8316	1.28832	Dengue	QC	NaN	NaN	NaN	43.1707	0.0848614
Dengue / QC	_EAGIPEFYDYDVALIKLK_	B4E1Z4	1.35933	1.35933	1.26407e-06	2.33526e-06	36	B4E1Z4	NaN	cDNA FLJ55673, highly similar to Complement factor B (EC 3.4.21.47)	B4E1Z4_HUMAN	1	156.566	2.56566	Dengue	QC	NaN	NaN	NaN	25.8299	0.26951
Dengue / QC	_KC[Carbamidomethyl (C)]QC[Carbamidomethyl (C)]DELC[Carbamidomethyl (C)]SYYQSC[Carbamidomethyl (C)]C[Carbamidomethyl (C)]TDYTAEC[Carbamidomethyl (C)]KPQVTR_	P04004	0.391525	0.391525	1.27386e-06	2.35038e-06	70	P04004	VTN	Vitronectin	VTNC_HUMAN	1	31.1779	1.31178	Dengue	QC	NaN	NaN	NaN	34.1094	0.0818943
Dengue / QC	_HTFMGVVSLGSPSGEVSHPRK_	P02765	1.89008	1.89008	1.27963e-06	2.3603e-06	40	P02765	AHSG	Alpha-2-HS-glycoprotein	FETUA_HUMAN	1	270.657	3.70657	Dengue	QC	NaN	NaN	NaN	26.8795	0.265604
Dengue / QC	_LMIYEVSK_	P01709	-0.658703	0.658703	1.28017e-06	2.36055e-06	172	P01709	IGLV2-8	Immunoglobulin lambda variable 2-8	LV208_HUMAN	1	-36.6553	0.633447	Dengue	QC	NaN	NaN	NaN	99.9744	0.118174
Dengue / QC	_RAPDLQDLPWQVK_	P22891;P22891-2	0.348043	0.348043	1.28821e-06	2.3739e-06	120	P22891;P22891-2	PROZ	Vitamin K-dependent protein Z;Isoform 2 of Vitamin K-dependent protein Z	PROZ_HUMAN	1	27.2833	1.27283	Dengue	QC	NaN	NaN	NaN	105.3	0.0841102
Dengue / QC	_VTGVVLFR_	P08294	0.862638	0.862638	1.29999e-06	2.39486e-06	86	P08294	SOD3	Extracellular superoxide dismutase [Cu-Zn]	SODE_HUMAN	1	81.8361	1.81836	Dengue	QC	NaN	NaN	NaN	69.2237	0.172426
Dengue / QC	_KVETNM[Oxidation (M)]AFSPFSIASLLTQVLLGAGENTK_	P05155;P05155-3	0.229122	0.229122	1.30186e-06	2.39755e-06	60	P05155;P05155-3	SERPING1	Plasma protease C1 inhibitor;Isoform 3 of Plasma protease C1 inhibitor	IC1_HUMAN	1	17.2122	1.17212	Dengue	QC	NaN	NaN	NaN	8.82607	0.203438
Dengue / QC	_GEC[Carbamidomethyl (C)]QAEGVLFFQGDREWFWDLATGTMKER_	P02790	1.21773	1.21773	1.30955e-06	2.40718e-06	80	P02790	HPX	Hemopexin	HEMO_HUMAN	1	132.581	2.32581	Dengue	QC	NaN	NaN	NaN	22.2928	0.159073
Dengue / QC	_AGC[Carbamidomethyl (C)]VAESTAVC[Carbamidomethyl (C)]R_	Q9Y6R7	1.00923	1.00923	1.31329e-06	2.4133e-06	82	Q9Y6R7	FCGBP	IgGFc-binding protein	FCGBP_HUMAN	1	101.284	2.01284	Dengue	QC	NaN	NaN	NaN	46.8016	0.263873
Dengue / QC	_DFNIPGFPTVR_	O00391	0.706138	0.706138	1.31633e-06	2.41737e-06	62	O00391	QSOX1	Sulfhydryl oxidase 1	QSOX1_HUMAN	1	63.1431	1.63143	Dengue	QC	NaN	NaN	NaN	52.7872	0.136449
Dengue / QC	_NADLQVLKPEPELVYEDLR_	P01833	1.60512	1.60512	1.34055e-06	2.45573e-06	66	P01833	PIGR	Polymeric immunoglobulin receptor	PIGR_HUMAN	1	204.22	3.0422	Dengue	QC	NaN	NaN	NaN	45.506	0.296466
Dengue / QC	_SNTVASLHTEKNTLELSNGVIVK_	P04114	0.42301	0.42301	1.34948e-06	2.47054e-06	60	P04114	APOB	Apolipoprotein B-100	APOB_HUMAN	1	34.0722	1.34072	Dengue	QC	NaN	NaN	NaN	34.5426	0.228331
Dengue / QC	_SLAPYAQDTQEK_	P06727	0.516549	0.516549	1.35951e-06	2.48736e-06	110	P06727	APOA4	Apolipoprotein A-IV	APOA4_HUMAN	1	43.0529	1.43053	Dengue	QC	NaN	NaN	NaN	101.294	0.093156
Dengue / QC	_C[Carbamidomethyl (C)]KSSNLIILEEHLK_	P08603	1.11085	1.11085	1.38433e-06	2.5268e-06	122	P08603	CFH	Complement factor H	CFAH_HUMAN	1	115.973	2.15973	Dengue	QC	NaN	NaN	NaN	105.887	0.185043
Dengue / QC	_DVVLTTTFVDDIK_	P02748	0.425666	0.425666	1.3845e-06	2.5268e-06	148	P02748	C9	Complement component C9	CO9_HUMAN	1	34.3192	1.34319	Dengue	QC	NaN	NaN	NaN	102.339	0.0805674
Dengue / QC	_ASC[Carbamidomethyl (C)]KVPVK_	P02749	1.04197	1.04197	1.3917e-06	2.53916e-06	36	P02749	APOH	Beta-2-glycoprotein 1	APOH_HUMAN	1	105.904	2.05904	Dengue	QC	NaN	NaN	NaN	20.3853	0.142058
Dengue / QC	_FQVDNNNRLLLQQVSLPELPGEYSMK_	P01023	1.64687	1.64687	1.4023e-06	2.55531e-06	168	P01023	A2M	Alpha-2-macroglobulin	A2MG_HUMAN	1	213.153	3.13153	Dengue	QC	NaN	NaN	NaN	135.502	0.187338
Dengue / QC	_TQFNNNEYSQDLDAYNTKDKIGVELTGR_	P04114	0.628438	0.628438	1.42179e-06	2.59004e-06	138	P04114	APOB	Apolipoprotein B-100	APOB_HUMAN	1	54.5891	1.54589	Dengue	QC	NaN	NaN	NaN	121.974	0.144545
Dengue / QC	_GLLVGEILSAVLSQEGINILTHLPK_	P01031	1.29488	1.29488	1.4265e-06	2.59701e-06	44	P01031	C5	Complement C5	CO5_HUMAN	1	145.357	2.45357	Dengue	QC	NaN	NaN	NaN	8.11313	0.147318
Dengue / QC	_AGFSWIEVTFK_	Q14624	0.621581	0.621581	1.46072e-06	2.65601e-06	54	Q14624	ITIH4	Inter-alpha-trypsin inhibitor heavy chain H4	ITIH4_HUMAN	1	53.856	1.53856	Dengue	QC	NaN	NaN	NaN	25.6141	0.130857
Dengue / QC	_KADGSYAAWLSR_	P0C0L5	-0.406454	0.406454	1.46201e-06	2.65754e-06	174	P0C0L5	C4B	Complement C4-B	CO4B_HUMAN	1	-24.5524	0.754476	Dengue	QC	NaN	NaN	NaN	107.953	0.0807844
Dengue / QC	_WDEELAAFAK_	Q6UXB8	0.509886	0.509886	1.4665e-06	2.66303e-06	60	Q6UXB8	PI16	Peptidase inhibitor 16	PI16_HUMAN	1	42.3937	1.42394	Dengue	QC	NaN	NaN	NaN	45.7373	0.107878
Dengue / QC	_NNQKSEPLIGR_	P02751;P02751-15;P02751-3;P02751-7	1.01748	1.01748	1.47317e-06	2.6737e-06	56	P02751;P02751-15;P02751-3;P02751-7	FN1	Fibronectin;Isoform 15 of Fibronectin;Isoform 3 of Fibronectin;Isoform 7 of Fibronectin	FINC_HUMAN	1	102.438	2.02438	Dengue	QC	NaN	NaN	NaN	33.4777	0.242045
Dengue / QC	_SRWQQGNIFSC[Carbamidomethyl (C)]SVM[Oxidation (M)]HEALHNR_	P01860	0.452651	0.452651	1.47393e-06	2.67425e-06	22	P01860	IGHG3	Immunoglobulin heavy constant gamma 3	IGHG3_HUMAN	1	36.8553	1.36855	Dengue	QC	NaN	NaN	NaN	9.49226	0.381578
Dengue / QC	_TYM[Oxidation (M)]LAFDVNDEKNWGLSVYADKPETTK_	P02763	1.6251	1.6251	1.53878e-06	2.78848e-06	110	P02763	ORM1	Alpha-1-acid glycoprotein 1	A1AG1_HUMAN	1	208.463	3.08463	Dengue	QC	NaN	NaN	NaN	67.4286	0.191131
Dengue / QC	_MVSGFIPLKPTVK_	P01023	-0.498696	0.498696	1.55761e-06	2.81999e-06	176	P01023	A2M	Alpha-2-macroglobulin	A2MG_HUMAN	1	-29.2254	0.707746	Dengue	QC	NaN	NaN	NaN	57.5456	0.0876699
Dengue / QC	_C[Carbamidomethyl (C)]C[Carbamidomethyl (C)]ESASEDC[Carbamidomethyl (C)]MAKELPEHTVK_	P02774;P02774-3	1.22131	1.22131	1.58797e-06	2.87143e-06	128	P02774;P02774-3	GC	Vitamin D-binding protein;Isoform 3 of Vitamin D-binding protein	VTDB_HUMAN	1	133.158	2.33158	Dengue	QC	NaN	NaN	NaN	107.694	0.214727
Dengue / QC	_ETC[Carbamidomethyl (C)]FAEEGK_	P02768	2.22351	2.22351	1.59344e-06	2.87932e-06	130	P02768	ALB	Serum albumin	ALBU_HUMAN	1	367.029	4.67029	Dengue	QC	NaN	NaN	NaN	68.7142	0.295031
Dengue / QC	_GIETGSEDLEILPNGLAFISSGLKYPGIK_	P27169	0.859114	0.859114	1.60759e-06	2.90333e-06	166	P27169	PON1	Serum paraoxonase/arylesterase 1	PON1_HUMAN	1	81.3924	1.81392	Dengue	QC	NaN	NaN	NaN	87.9832	0.121368
Dengue / QC	_YNPIPSVQLMGNGFHFLAGEPR_	P13671	0.844203	0.844203	1.61039e-06	2.9075e-06	74	P13671	C6	Complement component C6	CO6_HUMAN	1	79.5273	1.79527	Dengue	QC	NaN	NaN	NaN	38.573	0.113657
Dengue / QC	_ITYYHLSFPTNIQAPAVVFR_	P23142-4	0.406242	0.406242	1.62478e-06	2.93079e-06	146	P23142-4	FBLN1	Isoform C of Fibulin-1	FBLN1_HUMAN	1	32.5229	1.32523	Dengue	QC	NaN	NaN	NaN	115.409	0.0767511
Dengue / QC	_TWC[Carbamidomethyl (C)]EGTR_	Q04756	0.51761	0.51761	1.62734e-06	2.93449e-06	68	Q04756	HGFAC	Hepatocyte growth factor activator	HGFA_HUMAN	1	43.1582	1.43158	Dengue	QC	NaN	NaN	NaN	58.624	0.121401
Dengue / QC	_C[Carbamidomethyl (C)]PLLVDSEGWVK_	P01833	2.00143	2.00143	1.65871e-06	2.98467e-06	32	P01833	PIGR	Polymeric immunoglobulin receptor	PIGR_HUMAN	1	300.396	4.00396	Dengue	QC	NaN	NaN	NaN	23.6774	0.37014
Dengue / QC	_GM[Oxidation (M)]TNINDGLLR_	Q06033;Q06033-2	1.09736	1.09736	1.66495e-06	2.99498e-06	22	Q06033;Q06033-2	ITIH3	Inter-alpha-trypsin inhibitor heavy chain H3;Isoform 2 of Inter-alpha-trypsin inhibitor heavy chain H3	ITIH3_HUMAN	1	113.962	2.13962	Dengue	QC	NaN	NaN	NaN	16.4787	0.242003
Dengue / QC	_DYWSTVK_	B0YIW2;P02656	1.79945	1.79945	1.66759e-06	2.99881e-06	22	B0YIW2;P02656	APOC3	Apolipoprotein C-III	B0YIW2_HUMAN;APOC3_HUMAN	1	248.089	3.48089	Dengue	QC	NaN	NaN	NaN	9.9425	0.219232
Dengue / QC	_NGQWSEPPKC[Carbamidomethyl (C)]LHPC[Carbamidomethyl (C)]VISR_	P08603	0.726458	0.726458	1.67037e-06	3.00288e-06	146	P08603	CFH	Complement factor H	CFAH_HUMAN	1	65.4572	1.65457	Dengue	QC	NaN	NaN	NaN	119.978	0.103498
Dengue / QC	_NVVFVIDK_	Q14624	-0.503747	0.503747	1.68209e-06	3.02212e-06	176	Q14624	ITIH4	Inter-alpha-trypsin inhibitor heavy chain H4	ITIH4_HUMAN	1	-29.4728	0.705272	Dengue	QC	NaN	NaN	NaN	39.1246	0.0967435
Dengue / QC	_ALNSIIDVYHK_	P05109	2.48675	2.48675	1.70808e-06	3.066e-06	28	P05109	S100A8	Protein S100-A8	S10A8_HUMAN	1	460.513	5.60513	Dengue	QC	NaN	NaN	NaN	13.0556	0.229363
Dengue / QC	_HHFPRHPNVFGFC[Carbamidomethyl (C)]R_	P04196	3.87374	3.87374	1.72166e-06	3.08849e-06	24	P04196	HRG	Histidine-rich glycoprotein	HRG_HUMAN	1	1365.93	14.6593	Dengue	QC	NaN	NaN	NaN	11.5865	0.432781
Dengue / QC	_VGSQYRLEDSVTYHC[Carbamidomethyl (C)]SR_	B4E1Z4	1.43487	1.43487	1.72517e-06	3.09383e-06	140	B4E1Z4	NaN	cDNA FLJ55673, highly similar to Complement factor B (EC 3.4.21.47)	B4E1Z4_HUMAN	1	170.357	2.70357	Dengue	QC	NaN	NaN	NaN	124.693	0.243917
Dengue / QC	_YEDGTLSLTSTSDLQSGIIK_	P04114	0.381644	0.381644	1.73277e-06	3.10652e-06	140	P04114	APOB	Apolipoprotein B-100	APOB_HUMAN	1	30.2825	1.30283	Dengue	QC	NaN	NaN	NaN	115.6	0.0873293
Dengue / QC	_QGYDLSPLTPLSELSVQC[Carbamidomethyl (C)]NR_	P05160	0.676666	0.676666	1.74145e-06	3.11838e-06	98	P05160	F13B	Coagulation factor XIII B chain	F13B_HUMAN	1	59.8441	1.59844	Dengue	QC	NaN	NaN	NaN	28.924	0.142276
Dengue / QC	_TKELTSELKENFIR_	P80188;P80188-2	1.56123	1.56123	1.7415e-06	3.11838e-06	34	P80188;P80188-2	LCN2	Neutrophil gelatinase-associated lipocalin;Isoform 2 of Neutrophil gelatinase-associated lipocalin	NGAL_HUMAN	1	195.106	2.95106	Dengue	QC	NaN	NaN	NaN	18.4627	0.231478
Dengue / QC	_NVVVAC[Carbamidomethyl (C)]ENGLPVHLDQSIFR_	P03950	1.10606	1.10606	1.75856e-06	3.14606e-06	22	P03950	ANG	Angiogenin	ANGI_HUMAN	1	115.257	2.15257	Dengue	QC	NaN	NaN	NaN	15.6652	0.193432
Dengue / QC	_LVTDLTKVHTEC[Carbamidomethyl (C)]C[Carbamidomethyl (C)]HGDLLEC[Carbamidomethyl (C)]ADDR_	P02768	0.968849	0.968849	1.76607e-06	3.15757e-06	148	P02768	ALB	Serum albumin	ALBU_HUMAN	1	95.7279	1.95728	Dengue	QC	NaN	NaN	NaN	133.063	0.180994
Dengue / QC	_LMALREPAAQAPVK_	A0A0A0MS09;P01880;P01880-2	1.07112	1.07112	1.78192e-06	3.18494e-06	28	A0A0A0MS09;P01880;P01880-2	IGHD	Immunoglobulin heavy constant delta (Fragment);Immunoglobulin heavy constant delta;Isoform 2 of Immunoglobulin heavy constant delta	A0A0A0MS09_HUMAN;IGHD_HUMAN;IGHD_HUMAN	1	110.107	2.10107	Dengue	QC	NaN	NaN	NaN	20.4494	0.169938
Dengue / QC	_AAC[Carbamidomethyl (C)]LLPKLDELRDEGK_	P02768	1.76433	1.76433	1.79869e-06	3.21199e-06	154	P02768	ALB	Serum albumin	ALBU_HUMAN	1	239.715	3.39715	Dengue	QC	NaN	NaN	NaN	137.851	0.27527
Dengue / QC	_FDSDAASQR_	P05534;P30447	3.01043	3.01043	1.80877e-06	3.22803e-06	20	P05534;P30447	HLA-A	HLA class I histocompatibility antigen, A-24 alpha chain;HLA class I histocompatibility antigen, A-23 alpha chain	1A24_HUMAN;1A23_HUMAN	1	705.803	8.05803	Dengue	QC	NaN	NaN	NaN	8.55477	0.229982
Dengue / QC	_NPDSSTTGPWC[Carbamidomethyl (C)]YTTDPTVRR_	P00734	0.279742	0.279742	1.80989e-06	3.22905e-06	166	P00734	F2	Prothrombin	THRB_HUMAN	1	21.3977	1.21398	Dengue	QC	NaN	NaN	NaN	103.373	0.0524015
Dengue / QC	_VGFYESDVMGR_	P01023	-0.372968	0.372968	1.8394e-06	3.27872e-06	174	P01023	A2M	Alpha-2-macroglobulin	A2MG_HUMAN	1	-22.7808	0.772192	Dengue	QC	NaN	NaN	NaN	70.8331	0.0732966
Dengue / QC	_VHVSEEGTEPEAMLQVLGPK_	P06396	0.216729	0.216729	1.84824e-06	3.29347e-06	88	P06396	GSN	Gelsolin	GELS_HUMAN	1	16.2096	1.1621	Dengue	QC	NaN	NaN	NaN	41.8017	0.0929447
Dengue / QC	_VFEAMNSYDLGC[Carbamidomethyl (C)]GPGGGDSALQVFQAAGLAFSDGDQWTLSR_	P0C0L5	1.28263	1.28263	1.88686e-06	3.3576e-06	124	P0C0L5	C4B	Complement C4-B	CO4B_HUMAN	1	143.281	2.43281	Dengue	QC	NaN	NaN	NaN	14.6496	0.150142
Dengue / QC	_TQNPMVTGTSVLGVK_	P28070	2.26502	2.26502	1.88617e-06	3.3576e-06	16	P28070	PSMB4	Proteasome subunit beta type-4	PSB4_HUMAN	1	380.661	4.80661	Dengue	QC	NaN	NaN	NaN	8.35613	0.222947
Dengue / QC	_LVVLPFPK_	Q9UGM5	-0.53365	0.53365	1.89257e-06	3.36635e-06	176	Q9UGM5	FETUB	Fetuin-B	FETUB_HUMAN	1	-30.9195	0.690805	Dengue	QC	NaN	NaN	NaN	58.1023	0.0921883
Dengue / QC	_YLYEIARRHPYFYAPELLFFAK_	P02768	0.495617	0.495617	1.93937e-06	3.44438e-06	144	P02768	ALB	Serum albumin	ALBU_HUMAN	1	40.9924	1.40992	Dengue	QC	NaN	NaN	NaN	86.8288	0.0937316
Dengue / QC	_LSC[Carbamidomethyl (C)]AASGFTFDDYGMSWVR_	A0A0C4DH32	0.796553	0.796553	1.94948e-06	3.4613e-06	46	A0A0C4DH32	IGHV3-20	Immunoglobulin heavy variable 3-20	HV320_HUMAN	1	73.6947	1.73695	Dengue	QC	NaN	NaN	NaN	33.4015	0.181389
Dengue / QC	_IVQIYKDLLR_	P43652	0.857326	0.857326	2.01286e-06	3.56093e-06	32	P43652	AFM	Afamin	AFAM_HUMAN	1	81.1677	1.81168	Dengue	QC	NaN	NaN	NaN	25.5853	0.155977
Dengue / QC	_TTPPMLDSDGSFFLYSKLTVDK_	P01859	0.454184	0.454184	2.03351e-06	3.59531e-06	92	P01859	IGHG2	Immunoglobulin heavy constant gamma 2	IGHG2_HUMAN	1	37.0008	1.37001	Dengue	QC	NaN	NaN	NaN	69.5172	0.124517
Dengue / QC	_YNPVVIDFEMQPIHEVLR_	P07357	0.36341	0.36341	2.05076e-06	3.62145e-06	164	P07357	C8A	Complement component C8 alpha chain	CO8A_HUMAN	1	28.6463	1.28646	Dengue	QC	NaN	NaN	NaN	94.6936	0.0897599
Dengue / QC	_NDNDNIFLSPLSISTAFAMTK_	P01008	0.95664	0.95664	2.06472e-06	3.64391e-06	26	P01008	SERPINC1	Antithrombin-III	ANT3_HUMAN	1	94.0785	1.94078	Dengue	QC	NaN	NaN	NaN	18.8438	0.15859
Dengue / QC	_TPC[Carbamidomethyl (C)]TVSC[Carbamidomethyl (C)]NIPVVSGKEC[Carbamidomethyl (C)]EEIIR_	P02675	1.90721	1.90721	2.07617e-06	3.66192e-06	114	P02675	FGB	Fibrinogen beta chain	FIBB_HUMAN	1	275.082	3.75082	Dengue	QC	NaN	NaN	NaN	103.027	0.360085
Dengue / QC	_SLTLGIEPVSPTSLR_	Q6EMK4	0.369827	0.369827	2.11556e-06	3.72694e-06	120	Q6EMK4	VASN	Vasorin	VASN_HUMAN	1	29.2198	1.2922	Dengue	QC	NaN	NaN	NaN	102.4	0.099756
Dengue / QC	_HLSLLTTLSNRVC[Carbamidomethyl (C)]SQYAAYGEKK_	P02774;P02774-3	0.604409	0.604409	2.11862e-06	3.72987e-06	102	P02774;P02774-3	GC	Vitamin D-binding protein;Isoform 3 of Vitamin D-binding protein	VTDB_HUMAN	1	52.0356	1.52036	Dengue	QC	NaN	NaN	NaN	76.3394	0.128203
Dengue / QC	_ALANSLAC[Carbamidomethyl (C)]QGK_	J3KPS3;P04075	1.94427	1.94427	2.12355e-06	3.73653e-06	22	J3KPS3;P04075	ALDOA	Fructose-bisphosphate aldolase;Fructose-bisphosphate aldolase A	J3KPS3_HUMAN;ALDOA_HUMAN	1	284.843	3.84843	Dengue	QC	NaN	NaN	NaN	13.584	0.326682
Dengue / QC	_STDTSC[Carbamidomethyl (C)]VNPPTVQNAHILSR_	Q03591	0.871821	0.871821	2.13225e-06	3.7496e-06	100	Q03591	CFHR1	Complement factor H-related protein 1	FHR1_HUMAN	1	82.9971	1.82997	Dengue	QC	NaN	NaN	NaN	68.2452	0.148277
Dengue / QC	_RSDFASNC[Carbamidomethyl (C)]C[Carbamidomethyl (C)]SINSPPLYC[Carbamidomethyl (C)]DSEIDAELKNIL_	P02774;P02774-3	1.04406	1.04406	2.1356e-06	3.75437e-06	70	P02774;P02774-3	GC	Vitamin D-binding protein;Isoform 3 of Vitamin D-binding protein	VTDB_HUMAN	1	106.202	2.06202	Dengue	QC	NaN	NaN	NaN	41.2366	0.154612
Dengue / QC	_LVPFATELHER_	P06727	0.453536	0.453536	2.14084e-06	3.76134e-06	98	P06727	APOA4	Apolipoprotein A-IV	APOA4_HUMAN	1	36.9393	1.36939	Dengue	QC	NaN	NaN	NaN	91.323	0.092872
Dengue / QC	_ALAEGVLLR_	P48637;P48637-2	1.81929	1.81929	2.18631e-06	3.83664e-06	26	P48637;P48637-2	GSS	Glutathione synthetase;Isoform 2 of Glutathione synthetase	GSHB_HUMAN	1	252.907	3.52907	Dengue	QC	NaN	NaN	NaN	11.5679	0.39428
Dengue / QC	_LTVAAPPSGGPGFLSIEWPDSRPPR_	A0A140TA49	12.4541	12.4541	2.19197e-06	3.84543e-06	12	A0A140TA49	C4A	Complement C4-A	A0A140TA49_HUMAN	1	561027	5611.27	Dengue	QC	NaN	NaN	NaN	5.49516	0.325651
Dengue / QC	_EVEGQILGTYVC[Carbamidomethyl (C)]IK_	P20851;P20851-2	0.601455	0.601455	2.22294e-06	3.89743e-06	162	P20851;P20851-2	C4BPB	C4b-binding protein beta chain;Isoform 2 of C4b-binding protein beta chain	C4BPB_HUMAN	1	51.7246	1.51725	Dengue	QC	NaN	NaN	NaN	109.926	0.109908
Dengue / QC	_GFPIKEDFLEQSEQLFGAKPVSLTGK_	P08697	0.342895	0.342895	2.23317e-06	3.91304e-06	132	P08697	SERPINF2	Alpha-2-antiplasmin	A2AP_HUMAN	1	26.8299	1.2683	Dengue	QC	NaN	NaN	NaN	102.084	0.0868932
Dengue / QC	_ILDELLQTC[Carbamidomethyl (C)]VDPEDC[Carbamidomethyl (C)]PVC[Carbamidomethyl (C)]EVAGRR_	P04275	0.666666	0.666666	2.24562e-06	3.93134e-06	84	P04275	VWF	von Willebrand factor	VWF_HUMAN	1	58.74	1.5874	Dengue	QC	NaN	NaN	NaN	61.6009	0.14905
Dengue / QC	_ASTPNGYDNGIIWATWK_	P02679;P02679-2	1.45301	1.45301	2.25209e-06	3.94032e-06	46	P02679;P02679-2	FGG	Fibrinogen gamma chain;Isoform Gamma-A of Fibrinogen gamma chain	FIBG_HUMAN	1	173.778	2.73778	Dengue	QC	NaN	NaN	NaN	38.3646	0.199814
Dengue / QC	_IALGGLLFPASNLR_	I3L145;P04278	1.17852	1.17852	2.27191e-06	3.96792e-06	58	I3L145;P04278	SHBG	Sex hormone-binding globulin	I3L145_HUMAN;SHBG_HUMAN	1	126.344	2.26344	Dengue	QC	NaN	NaN	NaN	38.8389	0.288713
Dengue / QC	_VVVQTESGGR_	P20742	3.21024	3.21024	2.30985e-06	4.03299e-06	66	P20742	PZP	Pregnancy zone protein	PZP_HUMAN	1	825.504	9.25504	Dengue	QC	NaN	NaN	NaN	30.4939	0.453682
Dengue / QC	_AYYHLLEQVAPKGDEEGVPAVVIDMSGLR_	P13796	0.428721	0.428721	2.31969e-06	4.04777e-06	96	P13796	LCP1	Plastin-2	PLSL_HUMAN	1	34.604	1.34604	Dengue	QC	NaN	NaN	NaN	88.5882	0.133021
Dengue / QC	_MPC[Carbamidomethyl (C)]AEDYLSVVLNQLC[Carbamidomethyl (C)]VLHEK_	P02768	0.57845	0.57845	2.33363e-06	4.06967e-06	176	P02768	ALB	Serum albumin	ALBU_HUMAN	1	49.3244	1.49324	Dengue	QC	NaN	NaN	NaN	110.694	0.129366
Dengue / QC	_LAAYLM[Oxidation (M)]LMR_	P04114	0.396354	0.396354	2.34532e-06	4.08765e-06	24	P04114	APOB	Apolipoprotein B-100	APOB_HUMAN	1	31.6177	1.31618	Dengue	QC	NaN	NaN	NaN	18.3366	0.108091
Dengue / QC	_YTLNKNSLKIEIPLPFGGK_	P04114	0.381993	0.381993	2.35564e-06	4.10441e-06	136	P04114	APOB	Apolipoprotein B-100	APOB_HUMAN	1	30.3141	1.30314	Dengue	QC	NaN	NaN	NaN	113.07	0.0910217
Dengue / QC	_SSGVPDRFSGSILGNK_	A0A075B6I0	-0.461191	0.461191	2.38376e-06	4.14726e-06	162	A0A075B6I0	IGLV8-61	Immunoglobulin lambda variable 8-61	LV861_HUMAN	1	-27.3614	0.726386	Dengue	QC	NaN	NaN	NaN	76.7348	0.0934753
Dengue / QC	_GGETSEMYLIQPDSSVKPYR_	P02675	1.85524	1.85524	2.39552e-06	4.16648e-06	142	P02675	FGB	Fibrinogen beta chain	FIBB_HUMAN	1	261.813	3.61813	Dengue	QC	NaN	NaN	NaN	134.011	0.348318
Dengue / QC	_AFQPFFVELTMPYSVIR_	P01023	0.436396	0.436396	2.39778e-06	4.16796e-06	176	P01023	A2M	Alpha-2-macroglobulin	A2MG_HUMAN	1	35.3219	1.35322	Dengue	QC	NaN	NaN	NaN	164.998	0.088988
Dengue / QC	_YEVSVYALKDTLTSRPAQGVVTTLENVSPPR_	P02751;P02751-15;P02751-3;P02751-7	0.907714	0.907714	2.41981e-06	4.20006e-06	60	P02751;P02751-15;P02751-3;P02751-7	FN1	Fibronectin;Isoform 15 of Fibronectin;Isoform 3 of Fibronectin;Isoform 7 of Fibronectin	FINC_HUMAN	1	87.607	1.87607	Dengue	QC	NaN	NaN	NaN	17.2059	0.153423
Dengue / QC	_HLIVTPSGC[Carbamidomethyl (C)]GEQNMIGMTPTVIAVHYLDETEQWEK_	P01024	0.413907	0.413907	2.45718e-06	4.25781e-06	170	P01024	C3	Complement C3	CO3_HUMAN	1	33.2289	1.33229	Dengue	QC	NaN	NaN	NaN	107.918	0.102748
Dengue / QC	_GWVTDGFSSLK_	B0YIW2;P02656	1.93434	1.93434	2.45599e-06	4.25781e-06	22	B0YIW2;P02656	APOC3	Apolipoprotein C-III	B0YIW2_HUMAN;APOC3_HUMAN	1	282.204	3.82204	Dengue	QC	NaN	NaN	NaN	15.0657	0.230085
Dengue / QC	_ELQETNAALQDVR_	G3XAP6;P49747	1.42314	1.42314	2.45743e-06	4.25781e-06	36	G3XAP6;P49747	COMP	Cartilage oligomeric matrix protein	G3XAP6_HUMAN;COMP_HUMAN	1	168.169	2.68169	Dengue	QC	NaN	NaN	NaN	18.7196	0.424692
Dengue / QC	_GGEGTGYFVDFSVR_	P04196	0.362215	0.362215	2.48396e-06	4.29744e-06	176	P04196	HRG	Histidine-rich glycoprotein	HRG_HUMAN	1	28.5397	1.2854	Dengue	QC	NaN	NaN	NaN	120.697	0.0729432
Dengue / QC	_YLLYYYSDSDKGQGSGVPSR_	A0A075B6J1	0.777424	0.777424	2.48973e-06	4.30617e-06	68	A0A075B6J1	IGLV5-37	Immunoglobulin lambda variable 5-37	LV537_HUMAN	1	71.4068	1.71407	Dengue	QC	NaN	NaN	NaN	49.6624	0.163182
Dengue / QC	_SIYKPGQTVKFR_	P01023	1.83909	1.83909	2.50836e-06	4.33584e-06	38	P01023	A2M	Alpha-2-macroglobulin	A2MG_HUMAN	1	257.784	3.57784	Dengue	QC	NaN	NaN	NaN	18.492	0.329069
Dengue / QC	_C[Carbamidomethyl (C)]QFFSYATQTFHKAEYR_	H0YAC1;P03952	1.65401	1.65401	2.51527e-06	4.3465e-06	30	H0YAC1;P03952	KLKB1	Plasma kallikrein (Fragment);Plasma kallikrein	H0YAC1_HUMAN;KLKB1_HUMAN	1	214.706	3.14706	Dengue	QC	NaN	NaN	NaN	25.404	0.230673
Dengue / QC	_SVDEALR_	P32119	1.24306	1.24306	2.52653e-06	4.36084e-06	102	P32119	PRDX2	Peroxiredoxin-2	PRDX2_HUMAN	1	136.7	2.367	Dengue	QC	NaN	NaN	NaN	67.6235	0.146234
Dengue / QC	_NIILEEGKEILVGDVGQTVDDPYATFVK_	P23528	1.52474	1.52474	2.53555e-06	4.37384e-06	26	P23528	CFL1	Cofilin-1	COF1_HUMAN	1	187.735	2.87735	Dengue	QC	NaN	NaN	NaN	17.6828	0.199078
Dengue / QC	_EEQFNSTYR_	P01861	0.968361	0.968361	2.56576e-06	4.42467e-06	32	P01861	IGHG4	Immunoglobulin heavy constant gamma 4	IGHG4_HUMAN	1	95.6617	1.95662	Dengue	QC	NaN	NaN	NaN	26.6984	0.214079
Dengue / QC	_GFPSVLRGGKYAATSQVLLPSK_	P01871	0.576008	0.576008	2.57824e-06	4.44358e-06	74	P01871	IGHM	Immunoglobulin heavy constant mu	IGHM_HUMAN	1	49.0719	1.49072	Dengue	QC	NaN	NaN	NaN	67.4814	0.112925
Dengue / QC	_AVLTIDEK_	P01009	-0.405642	0.405642	2.59067e-06	4.46239e-06	176	P01009	SERPINA1	Alpha-1-antitrypsin	A1AT_HUMAN	1	-24.51	0.7549	Dengue	QC	NaN	NaN	NaN	66.3211	0.0809318
Dengue / QC	_SQETGDLDVGGLQETDKIIEVEEEQEDPYLNDR_	P23142	0.916425	0.916425	2.59868e-06	4.47356e-06	86	P23142	FBLN1	Fibulin-1	FBLN1_HUMAN	1	88.7433	1.88743	Dengue	QC	NaN	NaN	NaN	27.3798	0.141583
Dengue / QC	_TSC[Carbamidomethyl (C)]LLFMGR_	P05546	0.354498	0.354498	2.61917e-06	4.50619e-06	134	P05546	SERPIND1	Heparin cofactor 2	HEP2_HUMAN	1	27.854	1.27854	Dengue	QC	NaN	NaN	NaN	104.266	0.0907806
Dengue / QC	_QINSYVK_	P08185	0.61626	0.61626	2.68164e-06	4.60829e-06	42	P08185	SERPINA6	Corticosteroid-binding globulin	CBG_HUMAN	1	53.2896	1.5329	Dengue	QC	NaN	NaN	NaN	34.0746	0.104222
Dengue / QC	_KAPDAGGC[Carbamidomethyl (C)]LHADPDLGVLC[Carbamidomethyl (C)]PTGC[Carbamidomethyl (C)]QLQEALLQQERPIR_	P02675	1.7472	1.7472	2.71313e-06	4.65968e-06	128	P02675	FGB	Fibrinogen beta chain	FIBB_HUMAN	1	235.707	3.35707	Dengue	QC	NaN	NaN	NaN	116.403	0.3544
Dengue / QC	_DYFPEPVTVSWNSGALTSGVHTFPAVLQSSGLYSLSSVVTVPSSSLGTK_	P01861	0.638134	0.638134	2.72791e-06	4.68233e-06	172	P01861	IGHG4	Immunoglobulin heavy constant gamma 4	IGHG4_HUMAN	1	55.6314	1.55631	Dengue	QC	NaN	NaN	NaN	62.9676	0.120874
Dengue / QC	_NMAEQIIQEIYSQIQSK_	A0A0B4J1R6;P29401;P29401-2	1.46466	1.46466	2.79393e-06	4.79007e-06	38	A0A0B4J1R6;P29401;P29401-2	TKT	Transketolase;Transketolase;Isoform 2 of Transketolase	A0A0B4J1R6_HUMAN;TKT_HUMAN;TKT_HUMAN	1	175.998	2.75998	Dengue	QC	NaN	NaN	NaN	20.3391	0.272918
Dengue / QC	_LMNIFLKDSITTWEILAVSMSDKK_	P01024	0.920549	0.920549	2.80432e-06	4.80507e-06	148	P01024	C3	Complement C3	CO3_HUMAN	1	89.2836	1.89284	Dengue	QC	NaN	NaN	NaN	84.4007	0.138537
Dengue / QC	_NAIGGKFPLYNLGFGNNLNYNFLENM[Oxidation (M)]ALENHGFAR_	Q06033;Q06033-2	0.638618	0.638618	2.83979e-06	4.86018e-06	60	Q06033;Q06033-2	ITIH3	Inter-alpha-trypsin inhibitor heavy chain H3;Isoform 2 of Inter-alpha-trypsin inhibitor heavy chain H3	ITIH3_HUMAN	1	55.6837	1.55684	Dengue	QC	NaN	NaN	NaN	20.2049	0.837817
Dengue / QC	_WSSPPVC[Carbamidomethyl (C)]LEPC[Carbamidomethyl (C)]TVNVDYMNR_	P05160	0.547228	0.547228	2.8418e-06	4.86222e-06	70	P05160	F13B	Coagulation factor XIII B chain	F13B_HUMAN	1	46.1276	1.46128	Dengue	QC	NaN	NaN	NaN	27.2722	0.119842
Dengue / QC	_ASVDSGSSEEQGGSSR_	P01833	2.75324	2.75324	2.85217e-06	4.8757e-06	18	P01833	PIGR	Polymeric immunoglobulin receptor	PIGR_HUMAN	1	574.23	6.7423	Dengue	QC	NaN	NaN	NaN	8.69001	0.23279
Dengue / QC	_LLIYGASIR_	A0A087WSY6	-0.400663	0.400663	2.85996e-06	4.88477e-06	176	A0A087WSY6	IGKV3D-15	Immunoglobulin kappa variable 3D-15	KVD15_HUMAN	1	-24.249	0.75751	Dengue	QC	NaN	NaN	NaN	85.766	0.0736242
Dengue / QC	_SC[Carbamidomethyl (C)]PTC[Carbamidomethyl (C)]TDSLLNGDFTITYDVNR_	Q06033;Q06033-2	7.93429	7.93429	2.90313e-06	4.94843e-06	26	Q06033;Q06033-2	ITIH3	Inter-alpha-trypsin inhibitor heavy chain H3;Isoform 2 of Inter-alpha-trypsin inhibitor heavy chain H3	ITIH3_HUMAN	1	24360.1	244.601	Dengue	QC	NaN	NaN	NaN	9.89824	0.384557
Dengue / QC	_SLGNVIM[Oxidation (M)]VC[Carbamidomethyl (C)]R_	P08603	0.92723	0.92723	2.96485e-06	5.03759e-06	46	P08603	CFH	Complement factor H	CFAH_HUMAN	1	90.1621	1.90162	Dengue	QC	NaN	NaN	NaN	18.6224	0.160901
Dengue / QC	_PQYMVLVPSLLHTETTEK_	P01023	0.543381	0.543381	2.96408e-06	5.03759e-06	118	P01023	A2M	Alpha-2-macroglobulin	A2MG_HUMAN	1	45.7384	1.45738	Dengue	QC	NaN	NaN	NaN	107.043	0.107067
Dengue / QC	_AGPHC[Carbamidomethyl (C)]PTAQLIATLKNGRK_	P10720	1.94626	1.94626	2.99285e-06	5.08369e-06	16	P10720	PF4V1	Platelet factor 4 variant	PF4V_HUMAN	1	285.375	3.85375	Dengue	QC	NaN	NaN	NaN	8.94033	0.201702
Dengue / QC	_AEFAEVSK_	P02768	-0.430692	0.430692	3.01878e-06	5.12627e-06	176	P02768	ALB	Serum albumin	ALBU_HUMAN	1	-25.8094	0.741906	Dengue	QC	NaN	NaN	NaN	44.4269	0.0895634
Dengue / QC	_LSQLSVTDVTTSSLR_	A0A087X0I0;A0A140T8Y3;A0A140T8Z8;A0A140TA52;P22105;P22105-3;P22105-4	0.467651	0.467651	3.04026e-06	5.15977e-06	78	A0A087X0I0;A0A140T8Y3;A0A140T8Z8;A0A140TA52;P22105;P22105-3;P22105-4	TNXB	Tenascin-X;Tenascin-X;Tenascin-X (Fragment);Tenascin-X;Tenascin-X;Isoform 4 of Tenascin-X;Isoform 5 of Tenascin-X	A0A087X0I0_HUMAN;A0A140T8Y3_HUMAN;A0A140T8Z8_HUMAN;A0A140TA52_HUMAN;TENX_HUMAN;TENX_HUMAN;TENX_HUMAN	1	38.2856	1.38286	Dengue	QC	NaN	NaN	NaN	59.2938	0.125025
Dengue / QC	_GADVWFK_	P05109	1.86802	1.86802	3.0732e-06	5.21115e-06	42	P05109	S100A8	Protein S100-A8	S10A8_HUMAN	1	265.03	3.6503	Dengue	QC	NaN	NaN	NaN	18.8996	0.256355
Dengue / QC	_QTLSWTVTPK_	P20742	2.305	2.305	3.20922e-06	5.42772e-06	102	P20742	PZP	Pregnancy zone protein	PZP_HUMAN	1	394.167	4.94167	Dengue	QC	NaN	NaN	NaN	55.6519	0.621187
Dengue / QC	_VPQVSTPTLVEVSR_	P02768	-0.262114	0.262114	3.24045e-06	5.47897e-06	176	P02768	ALB	Serum albumin	ALBU_HUMAN	1	-16.6135	0.833865	Dengue	QC	NaN	NaN	NaN	69.033	0.0498851
Dengue / QC	_VTEENKELANELR_	P07996	1.34038	1.34038	3.29512e-06	5.56181e-06	34	P07996	THBS1	Thrombospondin-1	TSP1_HUMAN	1	153.218	2.53218	Dengue	QC	NaN	NaN	NaN	7.01638	0.0901229
Dengue / QC	_IQALQQQADEAEDRAQGLQR_	P67936	0.88788	0.88788	3.37388e-06	5.68498e-06	66	P67936	TPM4	Tropomyosin alpha-4 chain	TPM4_HUMAN	1	85.0455	1.85045	Dengue	QC	NaN	NaN	NaN	48.9475	0.145301
Dengue / QC	_QLPGGQNPVSYVYLEVVSK_	P01031	0.528937	0.528937	3.37762e-06	5.68963e-06	148	P01031	C5	Complement C5	CO5_HUMAN	1	44.2865	1.44287	Dengue	QC	NaN	NaN	NaN	91.8707	0.103491
Dengue / QC	_SVTC[Carbamidomethyl (C)]HVK_	A0A0G2JMB2	1.24723	1.24723	3.44183e-06	5.78786e-06	104	A0A0G2JMB2	IGHA2	Immunoglobulin heavy constant alpha 2 (Fragment)	A0A0G2JMB2_HUMAN	1	137.386	2.37386	Dengue	QC	NaN	NaN	NaN	98.0432	0.245466
Dengue / QC	_NSADNKVVC[Carbamidomethyl (C)]SC[Carbamidomethyl (C)]TEGYR_	P00740	0.719986	0.719986	3.45548e-06	5.80915e-06	108	P00740	F9	Coagulation factor IX	FA9_HUMAN	1	64.7167	1.64717	Dengue	QC	NaN	NaN	NaN	92.7638	0.127175
Dengue / QC	_LLLFSPSVVHLGVPLSVGVQLQDVPRGQVVK_	P0C0L5	1.22967	1.22967	3.48115e-06	5.84896e-06	68	P0C0L5	C4B	Complement C4-B	CO4B_HUMAN	1	134.513	2.34513	Dengue	QC	NaN	NaN	NaN	58.5042	0.191349
Dengue / QC	_GEAFTLKATVLNYLPKC[Carbamidomethyl (C)]IR_	P01023	0.691773	0.691773	3.48317e-06	5.85069e-06	88	P01023	A2M	Alpha-2-macroglobulin	A2MG_HUMAN	1	61.5267	1.61527	Dengue	QC	NaN	NaN	NaN	75.327	0.14812
Dengue / QC	_NNLELSTPLK_	P07225	0.319013	0.319013	3.55999e-06	5.9661e-06	22	P07225	PROS1	Vitamin K-dependent protein S	PROS_HUMAN	1	24.7477	1.24748	Dengue	QC	NaN	NaN	NaN	9.19393	0.163004
Dengue / QC	_EIFRWPESPK_	A0A0A0MS09;P01880;P01880-2	0.806263	0.806263	3.65946e-06	6.12013e-06	126	A0A0A0MS09;P01880;P01880-2	IGHD	Immunoglobulin heavy constant delta (Fragment);Immunoglobulin heavy constant delta;Isoform 2 of Immunoglobulin heavy constant delta	A0A0A0MS09_HUMAN;IGHD_HUMAN;IGHD_HUMAN	1	74.8676	1.74868	Dengue	QC	NaN	NaN	NaN	105.46	0.147706
Dengue / QC	_SSGSLLNNAIK_	P01023	-0.430906	0.430906	3.67866e-06	6.14746e-06	176	P01023	A2M	Alpha-2-macroglobulin	A2MG_HUMAN	1	-25.8204	0.741796	Dengue	QC	NaN	NaN	NaN	89.8153	0.076778
Dengue / QC	_VASYAAWIDSVLA_	K7ERG9;P00746	0.791912	0.791912	3.70474e-06	6.1893e-06	138	K7ERG9;P00746	CFD	Complement factor D	K7ERG9_HUMAN;CFAD_HUMAN	1	73.1368	1.73137	Dengue	QC	NaN	NaN	NaN	128.995	0.147051
Dengue / QC	_ANRPFLVFIR_	P01008	-0.389993	0.389993	3.74702e-06	6.25282e-06	170	P01008	SERPINC1	Antithrombin-III	ANT3_HUMAN	1	-23.6866	0.763134	Dengue	QC	NaN	NaN	NaN	79.8056	0.0729225
Dengue / QC	_IAQWQSLK_	P20742	2.75902	2.75902	3.76415e-06	6.27785e-06	86	P20742	PZP	Pregnancy zone protein	PZP_HUMAN	1	576.936	6.76936	Dengue	QC	NaN	NaN	NaN	59.9181	0.514288
Dengue / QC	_IPC[Carbamidomethyl (C)]FLAGDTR_	P05164;P05164-2;P05164-3	1.78667	1.78667	3.80748e-06	6.34114e-06	26	P05164;P05164-2;P05164-3	MPO	Myeloperoxidase;Isoform H14 of Myeloperoxidase;Isoform H7 of Myeloperoxidase	PERM_HUMAN	1	245.018	3.45018	Dengue	QC	NaN	NaN	NaN	17.1546	0.22069
Dengue / QC	_NLRENGYEC[Carbamidomethyl (C)]EWR_	P04275	0.695018	0.695018	3.82499e-06	6.36424e-06	68	P04275	VWF	von Willebrand factor	VWF_HUMAN	1	61.8905	1.61891	Dengue	QC	NaN	NaN	NaN	51.3719	0.188172
Dengue / QC	_LRYHGDPMPC[Carbamidomethyl (C)]PK_	P09871	0.514439	0.514439	3.83508e-06	6.37807e-06	78	P09871	C1S	Complement C1s subcomponent	C1S_HUMAN	1	42.8439	1.42844	Dengue	QC	NaN	NaN	NaN	59.9311	0.129719
Dengue / QC	_IVDLVKELDRDTVFALVNYIFFK_	P01009	1.95943	1.95943	3.90712e-06	6.49053e-06	30	P01009	SERPINA1	Alpha-1-antitrypsin	A1AT_HUMAN	1	288.907	3.88907	Dengue	QC	NaN	NaN	NaN	25.0462	0.347539
Dengue / QC	_HYEGSTVPEKK_	P00738	0.691108	0.691108	3.91243e-06	6.49753e-06	172	P00738	HP	Haptoglobin	HPT_HUMAN	1	61.4524	1.61452	Dengue	QC	NaN	NaN	NaN	72.6279	0.148003
Dengue / QC	_IASFSQNC[Carbamidomethyl (C)]DIYPGK_	P01042	-0.321194	0.321194	3.91361e-06	6.49765e-06	174	P01042	KNG1	Kininogen-1	KNG1_HUMAN	1	-19.9593	0.800407	Dengue	QC	NaN	NaN	NaN	89.3515	0.0624844
Dengue / QC	_NTFAEVTGLSPGVTYYFK_	P02751;P02751-15;P02751-3;P02751-7	0.491241	0.491241	3.93965e-06	6.53351e-06	158	P02751;P02751-15;P02751-3;P02751-7	FN1	Fibronectin;Isoform 15 of Fibronectin;Isoform 3 of Fibronectin;Isoform 7 of Fibronectin	FINC_HUMAN	1	40.5653	1.40565	Dengue	QC	NaN	NaN	NaN	90.4927	0.102454
Dengue / QC	_TVRDTLPSC[Carbamidomethyl (C)]AVR_	Q96PD5	0.755449	0.755449	4.01232e-06	6.64466e-06	154	Q96PD5	PGLYRP2	N-acetylmuramoyl-L-alanine amidase	PGRP2_HUMAN	1	68.8156	1.68816	Dengue	QC	NaN	NaN	NaN	85.594	0.113103
Dengue / QC	_FQFPGKPGIYTR_	P04114	0.908125	0.908125	4.05112e-06	6.70327e-06	22	P04114	APOB	Apolipoprotein B-100	APOB_HUMAN	1	87.6605	1.8766	Dengue	QC	NaN	NaN	NaN	7.11438	0.0805442
Dengue / QC	_GALQNIIPASTGAAK_	P04406	0.750958	0.750958	4.07832e-06	6.74637e-06	46	P04406	GAPDH	Glyceraldehyde-3-phosphate dehydrogenase	G3P_HUMAN	1	68.291	1.68291	Dengue	QC	NaN	NaN	NaN	26.9947	0.135793
Dengue / QC	_WSSPPQC[Carbamidomethyl (C)]EGLPC[Carbamidomethyl (C)]KSPPEISHGVVAHMSDSYQYGEEVTYK_	P08603	1.28064	1.28064	4.11841e-06	6.80694e-06	80	P08603	CFH	Complement factor H	CFAH_HUMAN	1	142.946	2.42946	Dengue	QC	NaN	NaN	NaN	66.5584	0.230336
Dengue / QC	_ESGPTLVK_	P01817	0.625456	0.625456	4.13657e-06	6.83313e-06	42	P01817	IGHV2-5	Immunoglobulin heavy variable 2-5	HV205_HUMAN	1	54.2698	1.5427	Dengue	QC	NaN	NaN	NaN	36.3949	0.185004
Dengue / QC	_DSGEDPATC[Carbamidomethyl (C)]AFQR_	Q13103	0.368667	0.368667	4.16165e-06	6.86877e-06	70	Q13103	SPP2	Secreted phosphoprotein 24	SPP24_HUMAN	1	29.1159	1.29116	Dengue	QC	NaN	NaN	NaN	59.8664	0.112598
Dengue / QC	_QKLHELQEKLSPLGEEMR_	P02647	0.39944	0.39944	4.19275e-06	6.91815e-06	96	P02647	APOA1	Apolipoprotein A-I	APOA1_HUMAN	1	31.8996	1.319	Dengue	QC	NaN	NaN	NaN	62.4806	0.376285
Dengue / QC	_EQPGVYTK_	H0YAC1;P03952	0.323744	0.323744	4.20946e-06	6.94377e-06	98	H0YAC1;P03952	KLKB1	Plasma kallikrein (Fragment);Plasma kallikrein	H0YAC1_HUMAN;KLKB1_HUMAN	1	25.1574	1.25157	Dengue	QC	NaN	NaN	NaN	52.6124	0.0768754
Dengue / QC	_LLELTGPK_	P04217	-0.389785	0.389785	4.23098e-06	6.97536e-06	176	P04217	A1BG	Alpha-1B-glycoprotein	A1BG_HUMAN	1	-23.6757	0.763243	Dengue	QC	NaN	NaN	NaN	50.8035	0.0764028
Dengue / QC	_LQVVPVAANQR_	A0A087X0I0;A0A140T8Y3;A0A140T8Z8;A0A140TA52;P22105;P22105-3;P22105-4	0.14311	0.14311	4.25225e-06	7.00847e-06	84	A0A087X0I0;A0A140T8Y3;A0A140T8Z8;A0A140TA52;P22105;P22105-3;P22105-4	TNXB	Tenascin-X;Tenascin-X;Tenascin-X (Fragment);Tenascin-X;Tenascin-X;Isoform 4 of Tenascin-X;Isoform 5 of Tenascin-X	A0A087X0I0_HUMAN;A0A140T8Y3_HUMAN;A0A140T8Z8_HUMAN;A0A140TA52_HUMAN;TENX_HUMAN;TENX_HUMAN;TENX_HUMAN	1	10.4283	1.10428	Dengue	QC	NaN	NaN	NaN	55.4885	0.139666
Dengue / QC	_GEYEEHLGILGPIIR_	A0A0A0MRJ7;P12259	0.343698	0.343698	4.25445e-06	7.01014e-06	136	A0A0A0MRJ7;P12259	F5	Coagulation factor V	A0A0A0MRJ7_HUMAN;FA5_HUMAN	1	26.9005	1.26901	Dengue	QC	NaN	NaN	NaN	110.042	0.0905549
Dengue / QC	_SNVSDAVAQSTR_	P60174;P60174-1	2.42015	2.42015	4.39826e-06	7.23494e-06	26	P60174;P60174-1	TPI1	Triosephosphate isomerase;Isoform 2 of Triosephosphate isomerase	TPIS_HUMAN	1	435.226	5.35226	Dengue	QC	NaN	NaN	NaN	16.8559	0.392162
Dengue / QC	_NNNEKDM[Oxidation (M)]ALTAFVLISLQEAKDIC[Carbamidomethyl (C)]EEQVNSLPGSITK_	P01024	0.759609	0.759609	4.40914e-06	7.24878e-06	126	P01024	C3	Complement C3	CO3_HUMAN	1	69.3031	1.69303	Dengue	QC	NaN	NaN	NaN	79.5557	0.132421
Dengue / QC	_LGADM[Oxidation (M)]EDVC[Carbamidomethyl (C)]GR_	P02649	1.10221	1.10221	4.44255e-06	7.29759e-06	62	P02649	APOE	Apolipoprotein E	APOE_HUMAN	1	114.683	2.14683	Dengue	QC	NaN	NaN	NaN	39.8332	0.225069
Dengue / QC	_LNLVATPLFLKPGIPYPIK_	P01031	0.532134	0.532134	4.50698e-06	7.39105e-06	50	P01031	C5	Complement C5	CO5_HUMAN	1	44.6067	1.44607	Dengue	QC	NaN	NaN	NaN	29.1607	0.139222
Dengue / QC	_VAAGAFQGLR_	P02750	-0.358604	0.358604	4.51094e-06	7.39342e-06	172	P02750	LRG1	Leucine-rich alpha-2-glycoprotein	A2GL_HUMAN	1	-22.0081	0.779919	Dengue	QC	NaN	NaN	NaN	111.807	0.080184
Dengue / QC	_LLFKGSEMVVAGK_	Q14624	1.03596	1.03596	4.56941e-06	7.47676e-06	48	Q14624	ITIH4	Inter-alpha-trypsin inhibitor heavy chain H4	ITIH4_HUMAN	1	105.048	2.05048	Dengue	QC	NaN	NaN	NaN	36.9372	0.181038
Dengue / QC	_FNHLGHIFTFTPQNNEFQLQLSPK_	P04275	0.936538	0.936538	4.5834e-06	7.49757e-06	56	P04275	VWF	von Willebrand factor	VWF_HUMAN	1	91.393	1.91393	Dengue	QC	NaN	NaN	NaN	44.9107	0.221957
Dengue / QC	_TILDDLR_	P19823	0.740318	0.740318	4.62433e-06	7.56242e-06	50	P19823	ITIH2	Inter-alpha-trypsin inhibitor heavy chain H2	ITIH2_HUMAN	1	67.0544	1.67054	Dengue	QC	NaN	NaN	NaN	43.0143	0.132465
Dengue / QC	_EGFGHLSPTGTTEFWLGNEK_	P02679;P02679-2	1.63163	1.63163	4.65336e-06	7.60355e-06	122	P02679;P02679-2	FGG	Fibrinogen gamma chain;Isoform Gamma-A of Fibrinogen gamma chain	FIBG_HUMAN	1	209.864	3.09864	Dengue	QC	NaN	NaN	NaN	113.347	0.290498
Dengue / QC	_VTMSVDTSKNQFSLK_	A0A0C4DH34	-0.395253	0.395253	4.66517e-06	7.61861e-06	172	A0A0C4DH34	IGHV4-28	Immunoglobulin heavy variable 4-28	HV428_HUMAN	1	-23.9644	0.760356	Dengue	QC	NaN	NaN	NaN	47.6441	0.117464
Dengue / QC	_TGESAEFVC[Carbamidomethyl (C)]K_	Q03591	0.639596	0.639596	4.69172e-06	7.65771e-06	140	Q03591	CFHR1	Complement factor H-related protein 1	FHR1_HUMAN	1	55.7893	1.55789	Dengue	QC	NaN	NaN	NaN	98.0638	0.124042
Dengue / QC	_GISLANWMC[Carbamidomethyl (C)]LAK_	P61626	0.949814	0.949814	4.71847e-06	7.69498e-06	62	P61626	LYZ	Lysozyme C	LYSC_HUMAN	1	93.1623	1.93162	Dengue	QC	NaN	NaN	NaN	48.9416	0.157551
Dengue / QC	_AISGGSIQIENGYFVHYFAPEGLTTMPK_	Q14624	0.366823	0.366823	4.79593e-06	7.81481e-06	134	Q14624	ITIH4	Inter-alpha-trypsin inhibitor heavy chain H4	ITIH4_HUMAN	1	28.951	1.28951	Dengue	QC	NaN	NaN	NaN	94.7413	0.0882969
Dengue / QC	_ESDTSYVSLKAPLTKPLK_	P02741	1.03531	1.03531	4.82945e-06	7.86724e-06	42	P02741	CRP	C-reactive protein	CRP_HUMAN	1	104.955	2.04955	Dengue	QC	NaN	NaN	NaN	36.1829	0.17317
Dengue / QC	_WDRELISER_	P02790	0.423918	0.423918	4.86684e-06	7.915e-06	132	P02790	HPX	Hemopexin	HEMO_HUMAN	1	34.1566	1.34157	Dengue	QC	NaN	NaN	NaN	56.4755	0.0874164
Dengue / QC	_TYIYDHGFPYTDPVGVLYEDGDDTVATR_	P04180	0.519621	0.519621	4.89044e-06	7.94899e-06	162	P04180	LCAT	Phosphatidylcholine-sterol acyltransferase	LCAT_HUMAN	1	43.3579	1.43358	Dengue	QC	NaN	NaN	NaN	101.883	0.0900123
Dengue / QC	_VVWC[Carbamidomethyl (C)]AVGEQELRK_	E7ER44;P02788	1.94708	1.94708	4.89444e-06	7.95329e-06	36	E7ER44;P02788	LTF	Lactotransferrin	E7ER44_HUMAN;TRFL_HUMAN	1	285.595	3.85595	Dengue	QC	NaN	NaN	NaN	24.2795	0.281
Dengue / QC	_FDEFFSEGC[Carbamidomethyl (C)]APGSKK_	P02787	-0.315569	0.315569	4.90492e-06	7.96812e-06	176	P02787	TF	Serotransferrin	TRFE_HUMAN	1	-19.6466	0.803534	Dengue	QC	NaN	NaN	NaN	94.0794	0.0676249
Dengue / QC	_SSSNEEVMFLTVQVKGPTQEFK_	P01023	1.12428	1.12428	4.91001e-06	7.97199e-06	84	P01023	A2M	Alpha-2-macroglobulin	A2MG_HUMAN	1	117.993	2.17993	Dengue	QC	NaN	NaN	NaN	61.988	0.177481
Dengue / QC	_RRDGYLFQLLR_	P04196	0.301052	0.301052	4.90924e-06	7.97199e-06	114	P04196	HRG	Histidine-rich glycoprotein	HRG_HUMAN	1	23.2043	1.23204	Dengue	QC	NaN	NaN	NaN	99.9107	0.0869618
Dengue / QC	_QSGSEC[Carbamidomethyl (C)]IC[Carbamidomethyl (C)]MSPEEDC[Carbamidomethyl (C)]SHHSEDLC[Carbamidomethyl (C)]VFDTDSNDYFTSPAC[Carbamidomethyl (C)]K_	P13671	0.546025	0.546025	4.92323e-06	7.99125e-06	150	P13671	C6	Complement component C6	CO6_HUMAN	1	46.0057	1.46006	Dengue	QC	NaN	NaN	NaN	86.382	0.0880073
Dengue / QC	_S[Acetyl (Protein N-term)]DKPDM[Oxidation (M)]AEIEK_	P62328	2.11353	2.11353	4.98739e-06	8.08202e-06	22	P62328	TMSB4X	Thymosin beta-4	TYB4_HUMAN	1	332.748	4.32748	Dengue	QC	NaN	NaN	NaN	14.4731	0.337029
Dengue / QC	_WYQMGIVSWGEGC[Carbamidomethyl (C)]DR_	P00734	0.626674	0.626674	5.02178e-06	8.13326e-06	114	P00734	F2	Prothrombin	THRB_HUMAN	1	54.4001	1.544	Dengue	QC	NaN	NaN	NaN	33.9384	0.107949
Dengue / QC	_IDSLLENDR_	P10909;P10909-2;P10909-4;P10909-5	0.467193	0.467193	5.03201e-06	8.1476e-06	82	P10909;P10909-2;P10909-4;P10909-5	CLU	Clusterin;Isoform 2 of Clusterin;Isoform 4 of Clusterin;Isoform 5 of Clusterin	CLUS_HUMAN	1	38.2417	1.38242	Dengue	QC	NaN	NaN	NaN	45.6465	0.0738759
Dengue / QC	_QVC[Carbamidomethyl (C)]TDINEC[Carbamidomethyl (C)]ETGQHNC[Carbamidomethyl (C)]VPNSVC[Carbamidomethyl (C)]INTR_	G3XAP6;P49747	0.899035	0.899035	5.05777e-06	8.18254e-06	50	G3XAP6;P49747	COMP	Cartilage oligomeric matrix protein	G3XAP6_HUMAN;COMP_HUMAN	1	86.4818	1.86482	Dengue	QC	NaN	NaN	NaN	32.3432	0.210001
Dengue / QC	_M[Oxidation (M)]NFRPGVLSSR_	Q14624	3.23303	3.23303	5.067e-06	8.19523e-06	94	Q14624	ITIH4	Inter-alpha-trypsin inhibitor heavy chain H4	ITIH4_HUMAN	1	840.24	9.4024	Dengue	QC	NaN	NaN	NaN	50.2417	0.264919
Dengue / QC	_GHFSISIPVK_	P01023	-0.417135	0.417135	5.16869e-06	8.34593e-06	176	P01023	A2M	Alpha-2-macroglobulin	A2MG_HUMAN	1	-25.109	0.74891	Dengue	QC	NaN	NaN	NaN	115.133	0.0839912
Dengue / QC	_NSITLTNLTPGTEYVVSIVALNGREESPLLIGQQSTVSDVPR_	P02751;P02751-15;P02751-3;P02751-7	0.888857	0.888857	5.17279e-06	8.35026e-06	46	P02751;P02751-15;P02751-3;P02751-7	FN1	Fibronectin;Isoform 15 of Fibronectin;Isoform 3 of Fibronectin;Isoform 7 of Fibronectin	FINC_HUMAN	1	85.1709	1.85171	Dengue	QC	NaN	NaN	NaN	12.095	0.191007
Dengue / QC	_FPEVDVLTK_	P04114	-0.464884	0.464884	5.17818e-06	8.35572e-06	172	P04114	APOB	Apolipoprotein B-100	APOB_HUMAN	1	-27.5471	0.724529	Dengue	QC	NaN	NaN	NaN	59.9303	0.0873576
Dengue / QC	_IIC[Carbamidomethyl (C)]DNTGITTVSK_	P05164;P05164-2;P05164-3	0.689194	0.689194	5.17901e-06	8.35572e-06	74	P05164;P05164-2;P05164-3	MPO	Myeloperoxidase;Isoform H14 of Myeloperoxidase;Isoform H7 of Myeloperoxidase	PERM_HUMAN	1	61.2382	1.61238	Dengue	QC	NaN	NaN	NaN	54.5728	0.16286
Dengue / QC	_QGETLNFLEIGYSR_	Q16610	0.801543	0.801543	5.23938e-06	8.43923e-06	104	Q16610	ECM1	Extracellular matrix protein 1	ECM1_HUMAN	1	74.2964	1.74296	Dengue	QC	NaN	NaN	NaN	67.5588	0.182348
Dengue / QC	_EGGPSQIGDALGFAVR_	P04275	0.546332	0.546332	5.27304e-06	8.49112e-06	102	P04275	VWF	von Willebrand factor	VWF_HUMAN	1	46.0368	1.46037	Dengue	QC	NaN	NaN	NaN	88.5603	0.122825
Dengue / QC	_ASGYTFTGYYMHWVR_	P23083	0.782521	0.782521	5.28712e-06	8.51147e-06	56	P23083	IGHV1-2	Immunoglobulin heavy variable 1-2	HV102_HUMAN	1	72.0134	1.72013	Dengue	QC	NaN	NaN	NaN	44.3823	0.224458
Dengue / QC	_SYSC[Carbamidomethyl (C)]QVTHEGSTVEKTVAPTEC[Carbamidomethyl (C)]S_	P0DOY2	1.63141	1.63141	5.37711e-06	8.6516e-06	166	P0DOY2	IGLC2	Immunoglobulin lambda constant 2	IGLC2_HUMAN	1	209.815	3.09815	Dengue	QC	NaN	NaN	NaN	150.704	0.291907
Dengue / QC	_LLLQM[Oxidation (M)]DSSATAYGSTVSKR_	P04114	0.615136	0.615136	5.4201e-06	8.71839e-06	64	P04114	APOB	Apolipoprotein B-100	APOB_HUMAN	1	53.1702	1.5317	Dengue	QC	NaN	NaN	NaN	43.9625	0.167585
Dengue / QC	_YQC[Carbamidomethyl (C)]KNYYK_	P00738	4.36434	4.36434	5.42831e-06	8.72921e-06	44	P00738	HP	Haptoglobin	HPT_HUMAN	1	1959.66	20.5966	Dengue	QC	NaN	NaN	NaN	28.9604	0.604881
Dengue / QC	_MTVTDQVNC[Carbamidomethyl (C)]PK_	P05090	0.423173	0.423173	5.45379e-06	8.76778e-06	174	P05090	APOD	Apolipoprotein D	APOD_HUMAN	1	34.0873	1.34087	Dengue	QC	NaN	NaN	NaN	97.0696	0.0795853
Dengue / QC	_KITEVALMGHLSC[Carbamidomethyl (C)]DTKEER_	P04114	0.685564	0.685564	5.51116e-06	8.85277e-06	48	P04114	APOB	Apolipoprotein B-100	APOB_HUMAN	1	60.8331	1.60833	Dengue	QC	NaN	NaN	NaN	43.4046	0.11875
Dengue / QC	_SPRPSSYKVILGAHQEVNLEPHVQEIEVSR_	P00747	-1.34687	1.34687	5.60626e-06	8.9859e-06	52	P00747	PLG	Plasminogen	PLMN_HUMAN	1	-60.6855	0.393145	Dengue	QC	NaN	NaN	NaN	11.0333	0.328493
Dengue / QC	_DIPQPHAEPWAFSLDLGLK_	I3L145;P04278	0.910019	0.910019	5.61683e-06	9.00039e-06	120	I3L145;P04278	SHBG	Sex hormone-binding globulin	I3L145_HUMAN;SHBG_HUMAN	1	87.907	1.87907	Dengue	QC	NaN	NaN	NaN	91.9762	0.156733
Dengue / QC	_VAAEDWKKGDTFSC[Carbamidomethyl (C)]M[Oxidation (M)]VGHEALPLAFTQK_	A0A0G2JMB2	-0.3197	0.3197	5.66354e-06	9.06783e-06	146	A0A0G2JMB2	IGHA2	Immunoglobulin heavy constant alpha 2 (Fragment)	A0A0G2JMB2_HUMAN	1	-19.8764	0.801236	Dengue	QC	NaN	NaN	NaN	69.6779	0.299673
Dengue / QC	_ETAVDGELVVLYDVKREEK_	P19823	0.68774	0.68774	5.73023e-06	9.17211e-06	140	P19823	ITIH2	Inter-alpha-trypsin inhibitor heavy chain H2	ITIH2_HUMAN	1	61.0759	1.61076	Dengue	QC	NaN	NaN	NaN	70.7362	0.113571
Dengue / QC	_IGEHTPSALAIMENANVLAR_	J3KPS3;P04075	1.71053	1.71053	5.90166e-06	9.42088e-06	40	J3KPS3;P04075	ALDOA	Fructose-bisphosphate aldolase;Fructose-bisphosphate aldolase A	J3KPS3_HUMAN;ALDOA_HUMAN	1	227.281	3.27281	Dengue	QC	NaN	NaN	NaN	16.6877	0.265621
Dengue / QC	_RMPC[Carbamidomethyl (C)]AEDYLSVVLNQLC[Carbamidomethyl (C)]VLHEKTPVSDR_	P02768	0.608733	0.608733	5.94945e-06	9.48945e-06	176	P02768	ALB	Serum albumin	ALBU_HUMAN	1	52.492	1.52492	Dengue	QC	NaN	NaN	NaN	157.27	0.137074
Dengue / QC	_IEEADC[Carbamidomethyl (C)]K_	P13671	0.839503	0.839503	5.96386e-06	9.50728e-06	96	P13671	C6	Complement component C6	CO6_HUMAN	1	78.9434	1.78943	Dengue	QC	NaN	NaN	NaN	35.3997	0.145833
Dengue / QC	_AHLDIAGSLEGHLR_	P04114	0.527622	0.527622	5.97238e-06	9.51827e-06	60	P04114	APOB	Apolipoprotein B-100	APOB_HUMAN	1	44.1551	1.44155	Dengue	QC	NaN	NaN	NaN	53.6848	0.134151
Dengue / QC	_NKPGVYTDVAYYLAWIR_	P00748	1.06887	1.06887	6.01113e-06	9.57484e-06	58	P00748	F12	Coagulation factor XII	FA12_HUMAN	1	109.779	2.09779	Dengue	QC	NaN	NaN	NaN	37.3526	0.208029
Dengue / QC	_SFVHLEPMSHELPC[Carbamidomethyl (C)]GHTQTVQAHYILNGGTLLGLK_	P01023	0.557139	0.557139	6.02497e-06	9.5943e-06	146	P01023	A2M	Alpha-2-macroglobulin	A2MG_HUMAN	1	47.1348	1.47135	Dengue	QC	NaN	NaN	NaN	140.651	0.113177
Dengue / QC	_SC[Carbamidomethyl (C)]HLAMAPNHAVVSR_	E7ER44;P02788	1.5883	1.5883	6.09481e-06	9.68715e-06	26	E7ER44;P02788	LTF	Lactotransferrin	E7ER44_HUMAN;TRFL_HUMAN	1	200.694	3.00694	Dengue	QC	NaN	NaN	NaN	20.686	0.28036
Dengue / QC	_LYHSEAFTVNFGDTEEAKK_	P01009	-0.444781	0.444781	6.1911e-06	9.83754e-06	158	P01009	SERPINA1	Alpha-1-antitrypsin	A1AT_HUMAN	1	-26.5304	0.734696	Dengue	QC	NaN	NaN	NaN	60.1147	0.0950974
Dengue / QC	_NDLGWYQQK_	A0A0C4DH72	0.127486	0.127486	6.31939e-06	1.00333e-05	104	A0A0C4DH72	IGKV1-6	Immunoglobulin kappa variable 1-6	KV106_HUMAN	1	9.23883	1.09239	Dengue	QC	NaN	NaN	NaN	65.2182	0.148904
Dengue / QC	_YRGDQDATMSILDISM[Oxidation (M)]M[Oxidation (M)]TGFAPDTDDLK_	P01024	0.544986	0.544986	6.44404e-06	1.01982e-05	24	P01024	C3	Complement C3	CO3_HUMAN	1	45.9006	1.45901	Dengue	QC	NaN	NaN	NaN	12.1678	0.228536
Dengue / QC	_ETTDTEQTPGQEVVLSPGSFMSITFR_	P48740	0.426415	0.426415	6.50275e-06	1.02883e-05	94	P48740	MASP1	Mannan-binding lectin serine protease 1	MASP1_HUMAN	1	34.389	1.34389	Dengue	QC	NaN	NaN	NaN	38.1993	0.106869
Dengue / QC	_EYSTC[Carbamidomethyl (C)]TSEGR_	P14780	1.71144	1.71144	6.50862e-06	1.02948e-05	20	P14780	MMP9	Matrix metalloproteinase-9	MMP9_HUMAN	1	227.488	3.27488	Dengue	QC	NaN	NaN	NaN	10.2993	0.247181
Dengue / QC	_IDITLSSVK_	Q08380	0.998321	0.998321	6.53517e-06	1.0334e-05	58	Q08380	LGALS3BP	Galectin-3-binding protein	LG3BP_HUMAN	1	99.7674	1.99767	Dengue	QC	NaN	NaN	NaN	42.4064	0.203417
Dengue / QC	_FDHVITNMNNNYEPR_	D6R934;P02746	-0.427566	0.427566	6.68158e-06	1.05514e-05	174	D6R934;P02746	C1QB	Complement C1q subcomponent subunit B	D6R934_HUMAN;C1QB_HUMAN	1	-25.6485	0.743515	Dengue	QC	NaN	NaN	NaN	35.9909	0.0925238
Dengue / QC	_GVPIPNKVIFIR_	P01023	-0.457208	0.457208	6.73419e-06	1.06174e-05	176	P01023	A2M	Alpha-2-macroglobulin	A2MG_HUMAN	1	-27.1605	0.728395	Dengue	QC	NaN	NaN	NaN	115.169	0.0784863
Dengue / QC	_VDNALQSGNSQESVTEQDSK_	P01834	-0.390329	0.390329	6.74415e-06	1.06299e-05	176	P01834	IGKC	Immunoglobulin kappa constant	IGKC_HUMAN	1	-23.7044	0.762956	Dengue	QC	NaN	NaN	NaN	71.953	0.0857904
Dengue / QC	_TLPEC[Carbamidomethyl (C)]SK_	P43652	0.573269	0.573269	6.789e-06	1.06887e-05	98	P43652	AFM	Afamin	AFAM_HUMAN	1	48.7892	1.48789	Dengue	QC	NaN	NaN	NaN	83.4503	0.115557
Dengue / QC	_MVETTAYALLTSLNLK_	P01031	0.652319	0.652319	6.79034e-06	1.06887e-05	98	P01031	C5	Complement C5	CO5_HUMAN	1	57.1692	1.57169	Dengue	QC	NaN	NaN	NaN	58.1039	0.166139
Dengue / QC	_VLSNVESGFSLKPC[Carbamidomethyl (C)]ALSEIGC[Carbamidomethyl (C)]HMNIFQHLAFSDVDVAR_	H0YAC1;P03952	0.829464	0.829464	6.88434e-06	1.08251e-05	98	H0YAC1;P03952	KLKB1	Plasma kallikrein (Fragment);Plasma kallikrein	H0YAC1_HUMAN;KLKB1_HUMAN	1	77.7024	1.77702	Dengue	QC	NaN	NaN	NaN	39.2469	0.109247
Dengue / QC	_VDFTLSSER_	P0C0L5	-0.323096	0.323096	6.92215e-06	1.08765e-05	176	P0C0L5	C4B	Complement C4-B	CO4B_HUMAN	1	-20.0647	0.799353	Dengue	QC	NaN	NaN	NaN	100.181	0.0681049
Dengue / QC	_HLEVDVWVIEPQGLR_	P19823	0.597136	0.597136	6.93203e-06	1.08884e-05	176	P19823	ITIH2	Inter-alpha-trypsin inhibitor heavy chain H2	ITIH2_HUMAN	1	51.271	1.51271	Dengue	QC	NaN	NaN	NaN	79.0997	0.138655
Dengue / QC	_FFSLLSGSLNSHGLELNADILGTDKINSGAHK_	P04114	0.573992	0.573992	6.9512e-06	1.09098e-05	76	P04114	APOB	Apolipoprotein B-100	APOB_HUMAN	1	48.8637	1.48864	Dengue	QC	NaN	NaN	NaN	46.0051	0.138531
Dengue / QC	_VQYEC[Carbamidomethyl (C)]ATGYYTAGGKK_	P05160	0.559258	0.559258	6.96317e-06	1.09257e-05	76	P05160	F13B	Coagulation factor XIII B chain	F13B_HUMAN	1	47.3512	1.47351	Dengue	QC	NaN	NaN	NaN	32.4961	0.108199
Dengue / QC	_PIC[Carbamidomethyl (C)]LPC[Carbamidomethyl (C)]TMEANLALR_	B4E1Z4	0.662658	0.662658	7.00018e-06	1.09779e-05	96	B4E1Z4	NaN	cDNA FLJ55673, highly similar to Complement factor B (EC 3.4.21.47)	B4E1Z4_HUMAN	1	58.2996	1.583	Dengue	QC	NaN	NaN	NaN	63.3948	0.144988
Dengue / QC	_FFSASC[Carbamidomethyl (C)]VPGADKGQFPNLC[Carbamidomethyl (C)]R_	E7ER44;P02788	1.38416	1.38416	7.01478e-06	1.09979e-05	44	E7ER44;P02788	LTF	Lactotransferrin	E7ER44_HUMAN;TRFL_HUMAN	1	161.02	2.6102	Dengue	QC	NaN	NaN	NaN	25.1003	0.247428
Dengue / QC	_MENAELDVPIQSVFTR_	P07996	0.426643	0.426643	7.07918e-06	1.10959e-05	116	P07996	THBS1	Thrombospondin-1	TSP1_HUMAN	1	34.4102	1.3441	Dengue	QC	NaN	NaN	NaN	68.3088	0.0973345
Dengue / QC	_EWVAIESDSVQPVPR_	Q96KN2	0.749942	0.749942	7.10458e-06	1.11298e-05	46	Q96KN2	CNDP1	Beta-Ala-His dipeptidase	CNDP1_HUMAN	1	68.1726	1.68173	Dengue	QC	NaN	NaN	NaN	35.797	0.158256
Dengue / QC	_ISEITNIVSK_	P20742	2.90666	2.90666	7.17475e-06	1.12367e-05	56	P20742	PZP	Pregnancy zone protein	PZP_HUMAN	1	649.88	7.4988	Dengue	QC	NaN	NaN	NaN	42.0617	0.529327
Dengue / QC	_TRKGNVATEISTER_	P04114	1.58686	1.58686	7.19998e-06	1.12702e-05	60	P04114	APOB	Apolipoprotein B-100	APOB_HUMAN	1	200.396	3.00396	Dengue	QC	NaN	NaN	NaN	35.3416	0.218151
Dengue / QC	_EVVTSEDGSDC[Carbamidomethyl (C)]PEAMDLGTLSGIGTLDGFR_	P02671	1.16814	1.16814	7.34494e-06	1.14757e-05	158	P02671	FGA	Fibrinogen alpha chain	FIBA_HUMAN	1	124.722	2.24722	Dengue	QC	NaN	NaN	NaN	149.157	0.214957
Dengue / QC	_TLADLTLLDSPIKVPLLLSEPINIIDALEM[Oxidation (M)]R_	P04114	0.713772	0.713772	7.36318e-06	1.15012e-05	118	P04114	APOB	Apolipoprotein B-100	APOB_HUMAN	1	64.0087	1.64009	Dengue	QC	NaN	NaN	NaN	15.5107	0.114778
Dengue / QC	_SIAYLQMNSLKTEDTAVYYC[Carbamidomethyl (C)]TR_	A0A0A0MS15	1.12289	1.12289	7.39066e-06	1.1538e-05	44	A0A0A0MS15	IGHV3-49	Immunoglobulin heavy variable 3-49	HV349_HUMAN	1	117.782	2.17782	Dengue	QC	NaN	NaN	NaN	25.5236	0.223723
Dengue / QC	_FTNIGPDTM[Oxidation (M)]R_	P02751;P02751-15;P02751-3;P02751-7	1.61723	1.61723	7.4138e-06	1.1568e-05	18	P02751;P02751-15;P02751-3;P02751-7	FN1	Fibronectin;Isoform 15 of Fibronectin;Isoform 3 of Fibronectin;Isoform 7 of Fibronectin	FINC_HUMAN	1	206.786	3.06786	Dengue	QC	NaN	NaN	NaN	11.7559	0.276035
Dengue / QC	_TAGWNIPM[Oxidation (M)]GLLYNKINHC[Carbamidomethyl (C)]RFDEFFSEGC[Carbamidomethyl (C)]APGSK_	P02787	2.01166	2.01166	7.42895e-06	1.15885e-05	124	P02787	TF	Serotransferrin	TRFE_HUMAN	1	303.247	4.03247	Dengue	QC	NaN	NaN	NaN	86.9894	0.301765
Dengue / QC	_VLSPADKTNVK_	P69905	0.696792	0.696792	7.53346e-06	1.17484e-05	174	P69905	HBA1	Hemoglobin subunit alpha	HBA_HUMAN	1	62.0897	1.6209	Dengue	QC	NaN	NaN	NaN	154.863	0.154835
Dengue / QC	_TEQAAVAR_	P00748	0.600162	0.600162	7.56055e-06	1.17844e-05	162	P00748	F12	Coagulation factor XII	FA12_HUMAN	1	51.5887	1.51589	Dengue	QC	NaN	NaN	NaN	57.2757	0.113367
Dengue / QC	_M[Oxidation (M)]KYWGVASFLQK_	P02753;Q5VY30	0.684409	0.684409	7.58539e-06	1.182e-05	116	P02753;Q5VY30	RBP4	Retinol-binding protein 4;Retinol binding protein 4, plasma, isoform CRA_b	RET4_HUMAN;Q5VY30_HUMAN	1	60.7043	1.60704	Dengue	QC	NaN	NaN	NaN	98.6213	0.125585
Dengue / QC	_SILQMSLDHHIVTPLTSLVIENEAGDER_	P19823	0.458478	0.458478	7.65989e-06	1.1933e-05	176	P19823	ITIH2	Inter-alpha-trypsin inhibitor heavy chain H2	ITIH2_HUMAN	1	37.4092	1.37409	Dengue	QC	NaN	NaN	NaN	144.646	0.0949394
Dengue / QC	_TGESVEFVC[Carbamidomethyl (C)]K_	P08603	0.457344	0.457344	7.78465e-06	1.21145e-05	176	P08603	CFH	Complement factor H	CFAH_HUMAN	1	37.3012	1.37301	Dengue	QC	NaN	NaN	NaN	104.983	0.08109
Dengue / QC	_KQLGAGSIEEC[Carbamidomethyl (C)]AAKC[Carbamidomethyl (C)]EEDEEFTC[Carbamidomethyl (C)]R_	P00747	0.452159	0.452159	7.80776e-06	1.21472e-05	152	P00747	PLG	Plasminogen	PLMN_HUMAN	1	36.8086	1.36809	Dengue	QC	NaN	NaN	NaN	140.287	0.107932
Dengue / QC	_LVFQQFDLEPSEGC[Carbamidomethyl (C)]FYDYVK_	B4DPQ0	0.922969	0.922969	7.81204e-06	1.21507e-05	118	B4DPQ0	C1R	Complement C1r subcomponent	B4DPQ0_HUMAN	1	89.6014	1.89601	Dengue	QC	NaN	NaN	NaN	69.8768	0.151514
Dengue / QC	_ESGPVLVKPTETLTLTC[Carbamidomethyl (C)]TVSGFSLSNAR_	A0A0B4J1V2	0.733839	0.733839	7.85689e-06	1.22108e-05	82	A0A0B4J1V2	IGHV2-26	Immunoglobulin heavy variable 2-26	HV226_HUMAN	1	66.3058	1.66306	Dengue	QC	NaN	NaN	NaN	72.9509	0.174994
Dengue / QC	_RHLVPGAPFLLQALVREMSGSPASGIPVK_	P0C0L5	1.04474	1.04474	7.99983e-06	1.24165e-05	96	P0C0L5	C4B	Complement C4-B	CO4B_HUMAN	1	106.3	2.063	Dengue	QC	NaN	NaN	NaN	53.3841	0.148988
Dengue / QC	_ITC[Carbamidomethyl (C)]SGE[Carboxy]ALPK_	A0A075B6K0	1.06454	1.06454	8.25574e-06	1.27867e-05	30	A0A075B6K0	IGLV3-16	Immunoglobulin lambda variable 3-16	LV316_HUMAN	1	109.15	2.0915	Dengue	QC	NaN	NaN	NaN	18.8194	0.234153
Dengue / QC	_C[Carbamidomethyl (C)]SAPDVHGSSILPGMLC[Carbamidomethyl (C)]AGFLEGGTDAC[Carbamidomethyl (C)]QGDSGGPLVC[Carbamidomethyl (C)]EDQAAER_	P00748	0.841952	0.841952	8.29996e-06	1.28518e-05	24	P00748	F12	Coagulation factor XII	FA12_HUMAN	1	79.2473	1.79247	Dengue	QC	NaN	NaN	NaN	18.6036	0.190441
Dengue / QC	_TMQENSTPRED_	P09871	0.128081	0.128081	8.32199e-06	1.28826e-05	72	P09871	C1S	Complement C1s subcomponent	C1S_HUMAN	1	9.28394	1.09284	Dengue	QC	NaN	NaN	NaN	39.966	0.216267
Dengue / QC	_TEHYEEQIEAFK_	P02748	-0.444648	0.444648	8.32448e-06	1.2883e-05	170	P02748	C9	Complement component C9	CO9_HUMAN	1	-26.5237	0.734763	Dengue	QC	NaN	NaN	NaN	50.2701	0.091399
Dengue / QC	_DNSKNTLYLQMNSLR_	A0A0J9YVT0;P0DP02	-0.49355	0.49355	8.36477e-06	1.29386e-05	176	A0A0J9YVT0;P0DP02	IGHV3-33;IGHV3-30-3	Immunoglobulin heavy variable 3-33 (Fragment);Immunoglobulin heavy variable 3-30-3	A0A0J9YVT0_HUMAN;HVC33_HUMAN	1	-28.9725	0.710275	Dengue	QC	NaN	NaN	NaN	69.0548	0.0948688
Dengue / QC	_GEWPWQVTLHTTSPTQR_	P03951	1.22558	1.22558	8.38857e-06	1.2972e-05	24	P03951	F11	Coagulation factor XI	FA11_HUMAN	1	133.849	2.33849	Dengue	QC	NaN	NaN	NaN	17.712	0.189094
Dengue / QC	_NKRDTMVEDLVVLVR_	P07358	1.16549	1.16549	8.42665e-06	1.30274e-05	42	P07358	C8B	Complement component C8 beta chain	CO8B_HUMAN	1	124.309	2.24309	Dengue	QC	NaN	NaN	NaN	15.0302	0.208233
Dengue / QC	_GAVDHKLSLESLTSYFSIESSTKGDVK_	P04114	1.03149	1.03149	8.59552e-06	1.32606e-05	44	P04114	APOB	Apolipoprotein B-100	APOB_HUMAN	1	104.413	2.04413	Dengue	QC	NaN	NaN	NaN	22.7148	0.218659
Dengue / QC	_ISGLIYEETR_	P62805	1.88343	1.88343	8.60167e-06	1.32666e-05	28	P62805	HIST1H4A	Histone H4	H4_HUMAN	1	268.952	3.68952	Dengue	QC	NaN	NaN	NaN	15.3771	0.311561
Dengue / QC	_MATTM[Oxidation (M)]IQSK_	P19823	1.08099	1.08099	8.62039e-06	1.3292e-05	90	P19823	ITIH2	Inter-alpha-trypsin inhibitor heavy chain H2	ITIH2_HUMAN	1	111.549	2.11549	Dengue	QC	NaN	NaN	NaN	47.7298	0.264256
Dengue / QC	_DALSSVQESQVAQQAR_	B0YIW2;P02656	-0.330659	0.330659	8.62756e-06	1.32996e-05	176	B0YIW2;P02656	APOC3	Apolipoprotein C-III	B0YIW2_HUMAN;APOC3_HUMAN	1	-20.4827	0.795173	Dengue	QC	NaN	NaN	NaN	116.434	0.0756247
Dengue / QC	_PLVEEPQNLIKQNC[Carbamidomethyl (C)]ELFEQLGEYK_	P02768	0.877398	0.877398	8.6431e-06	1.33166e-05	46	P02768	ALB	Serum albumin	ALBU_HUMAN	1	83.7059	1.83706	Dengue	QC	NaN	NaN	NaN	20.5703	0.400654
Dengue / QC	_TMTIHNGMFFSTYDRDNDGWLTSDPRK_	P02675	1.40436	1.40436	8.74244e-06	1.34555e-05	44	P02675	FGB	Fibrinogen beta chain	FIBB_HUMAN	1	164.7	2.647	Dengue	QC	NaN	NaN	NaN	37.0618	0.212159
Dengue / QC	_ELSHLPSLYDYSAYRR_	P10643	0.68566	0.68566	8.75367e-06	1.34693e-05	38	P10643	C7	Complement component C7	CO7_HUMAN	1	60.8437	1.60844	Dengue	QC	NaN	NaN	NaN	25.835	0.122482
Dengue / QC	_NPNLPPETVDSLKNILTSNNIDVKK_	P05090	0.441188	0.441188	8.78379e-06	1.35051e-05	124	P05090	APOD	Apolipoprotein D	APOD_HUMAN	1	35.7721	1.35772	Dengue	QC	NaN	NaN	NaN	75.8297	0.0965141
Dengue / QC	_WKC[Carbamidomethyl (C)]DPVDQC[Carbamidomethyl (C)]QDSETGTFYQIGDSWEK_	P02751;P02751-15;P02751-3;P02751-7	0.520425	0.520425	8.84897e-06	1.35981e-05	166	P02751;P02751-15;P02751-3;P02751-7	FN1	Fibronectin;Isoform 15 of Fibronectin;Isoform 3 of Fibronectin;Isoform 7 of Fibronectin	FINC_HUMAN	1	43.4378	1.43438	Dengue	QC	NaN	NaN	NaN	110.757	0.095483
Dengue / QC	_APGELEHGLITFSTR_	P48740	-0.279368	0.279368	8.91384e-06	1.36871e-05	170	P48740	MASP1	Mannan-binding lectin serine protease 1	MASP1_HUMAN	1	-17.6048	0.823952	Dengue	QC	NaN	NaN	NaN	68.8561	0.0585725
Dengue / QC	_VFSNGADLSGVTEEAPLK_	P01009	-0.535097	0.535097	9.02344e-06	1.3841e-05	168	P01009	SERPINA1	Alpha-1-antitrypsin	A1AT_HUMAN	1	-30.9888	0.690112	Dengue	QC	NaN	NaN	NaN	102.397	0.0973631
Dengue / QC	_EELATFDPVDNIVFNMAAGSAPMQLHLR_	O95445	0.460651	0.460651	9.05787e-06	1.38829e-05	30	O95445	APOM	Apolipoprotein M	APOM_HUMAN	1	37.6163	1.37616	Dengue	QC	NaN	NaN	NaN	22.0191	0.148798
Dengue / QC	_QFTSSTSYNRGDSTFESK_	P02671	1.74254	1.74254	9.0626e-06	1.38834e-05	172	P02671	FGA	Fibrinogen alpha chain	FIBA_HUMAN	1	234.624	3.34624	Dengue	QC	NaN	NaN	NaN	150.854	0.324776
Dengue / QC	_ATAVVDGAFK_	P32119	0.987269	0.987269	9.08426e-06	1.39125e-05	54	P32119	PRDX2	Peroxiredoxin-2	PRDX2_HUMAN	1	98.2428	1.98243	Dengue	QC	NaN	NaN	NaN	19.5245	0.264595
Dengue / QC	_YIYGKPVQGVAYVR_	P0C0L5	-0.328579	0.328579	9.10794e-06	1.39451e-05	176	P0C0L5	C4B	Complement C4-B	CO4B_HUMAN	1	-20.368	0.79632	Dengue	QC	NaN	NaN	NaN	107.298	0.0619492
Dengue / QC	_SASNMAIVDVK_	P01023	-0.287435	0.287435	9.11857e-06	1.39578e-05	176	P01023	A2M	Alpha-2-macroglobulin	A2MG_HUMAN	1	-18.0643	0.819357	Dengue	QC	NaN	NaN	NaN	91.2898	0.0638958
Dengue / QC	_EHVAHLLFLRDTK_	P19652	1.58018	1.58018	9.15286e-06	1.39993e-05	74	P19652	ORM2	Alpha-1-acid glycoprotein 2	A1AG2_HUMAN	1	199.007	2.99007	Dengue	QC	NaN	NaN	NaN	51.8629	0.219171
Dengue / QC	_LNM[Oxidation (M)]GITDLQGLR_	P0C0L5	0.483008	0.483008	9.15552e-06	1.39998e-05	62	P0C0L5	C4B	Complement C4-B	CO4B_HUMAN	1	39.7655	1.39765	Dengue	QC	NaN	NaN	NaN	47.7935	0.105663
Dengue / QC	_MLADAPPQDPSC[Carbamidomethyl (C)]C[Carbamidomethyl (C)]SGALYYGSK_	P19823	0.340743	0.340743	9.15853e-06	1.40007e-05	176	P19823	ITIH2	Inter-alpha-trypsin inhibitor heavy chain H2	ITIH2_HUMAN	1	26.6409	1.26641	Dengue	QC	NaN	NaN	NaN	132.096	0.0678675
Dengue / QC	_C[Carbamidomethyl (C)]NM[Oxidation (M)]GYEYSER_	P08603	0.503562	0.503562	9.1818e-06	1.40327e-05	70	P08603	CFH	Complement factor H	CFAH_HUMAN	1	41.771	1.41771	Dengue	QC	NaN	NaN	NaN	36.5162	0.166213
Dengue / QC	_RPC[Carbamidomethyl (C)]FSALEVDETYVPKEFNAETFTFHADIC[Carbamidomethyl (C)]TLSEK_	P02768	0.54184	0.54184	9.18692e-06	1.40368e-05	170	P02768	ALB	Serum albumin	ALBU_HUMAN	1	45.5828	1.45583	Dengue	QC	NaN	NaN	NaN	76.5523	0.122265
Dengue / QC	_YEGGREHVAHLLFLRDTK_	P19652	1.00604	1.00604	9.20738e-06	1.40625e-05	126	P19652	ORM2	Alpha-1-acid glycoprotein 2	A1AG2_HUMAN	1	100.838	2.00838	Dengue	QC	NaN	NaN	NaN	110.385	0.178645
Dengue / QC	_AHFSPSNIILDFPAAGSAAR_	O00391	0.852686	0.852686	9.26488e-06	1.41449e-05	42	O00391	QSOX1	Sulfhydryl oxidase 1	QSOX1_HUMAN	1	80.5859	1.80586	Dengue	QC	NaN	NaN	NaN	29.6204	0.169117
Dengue / QC	_ASQSVSSYLAWYQQKPGQAPR_	P04433	-0.756195	0.756195	9.31941e-06	1.42171e-05	176	P04433	IGKV3-11	Immunoglobulin kappa variable 3-11	KV311_HUMAN	1	-40.7944	0.592056	Dengue	QC	NaN	NaN	NaN	41.9212	0.143665
Dengue / QC	_TC[Carbamidomethyl (C)]QAWSSMTPHSHSR_	P08519	1.24397	1.24397	9.35823e-06	1.42689e-05	156	P08519	LPA	Apolipoprotein(a)	APOA_HUMAN	1	136.849	2.36849	Dengue	QC	NaN	NaN	NaN	137.331	0.21896
Dengue / QC	_ITFELVYEELLKR_	Q14624	0.514155	0.514155	9.35657e-06	1.42689e-05	136	Q14624	ITIH4	Inter-alpha-trypsin inhibitor heavy chain H4	ITIH4_HUMAN	1	42.8157	1.42816	Dengue	QC	NaN	NaN	NaN	63.4158	0.102437
Dengue / QC	_NNEEYLALIFEK_	O00391	1.34421	1.34421	9.42604e-06	1.43686e-05	38	O00391	QSOX1	Sulfhydryl oxidase 1	QSOX1_HUMAN	1	153.891	2.53891	Dengue	QC	NaN	NaN	NaN	22.2927	0.191588
Dengue / QC	_DYFMPC[Carbamidomethyl (C)]PGRGHGHR_	P02790	1.10882	1.10882	9.47003e-06	1.44245e-05	88	P02790	HPX	Hemopexin	HEMO_HUMAN	1	115.669	2.15669	Dengue	QC	NaN	NaN	NaN	67.2739	0.20151
Dengue / QC	_GRFTISRDNAK_	P01782	1.09426	1.09426	9.49788e-06	1.44588e-05	78	P01782	IGHV3-9	Immunoglobulin heavy variable 3-9	HV309_HUMAN	1	113.503	2.13503	Dengue	QC	NaN	NaN	NaN	60.7474	0.235042
Dengue / QC	_MNVAPAC[Carbamidomethyl (C)]LPERDWAESTLMTQK_	P00742	0.374666	0.374666	9.54804e-06	1.45282e-05	140	P00742	F10	Coagulation factor X	FA10_HUMAN	1	29.654	1.29654	Dengue	QC	NaN	NaN	NaN	96.0775	0.0730588
Dengue / QC	_VIQTAFQR_	P11597;P11597-2	0.586244	0.586244	9.5935e-06	1.45861e-05	48	P11597;P11597-2	CETP	Cholesteryl ester transfer protein;Isoform 2 of Cholesteryl ester transfer protein	CETP_HUMAN	1	50.1333	1.50133	Dengue	QC	NaN	NaN	NaN	40.1003	0.107164
Dengue / QC	_IYGKWYNLAIGSTC[Carbamidomethyl (C)]PWLK_	P02760	1.87435	1.87435	9.64907e-06	1.46554e-05	26	P02760	AMBP	Protein AMBP	AMBP_HUMAN	1	266.637	3.66637	Dengue	QC	NaN	NaN	NaN	17.055	0.322106
Dengue / QC	_KYSDASDC[Carbamidomethyl (C)]HGEDSQAFC[Carbamidomethyl (C)]EK_	P01023	-0.55219	0.55219	9.68194e-06	1.47016e-05	176	P01023	A2M	Alpha-2-macroglobulin	A2MG_HUMAN	1	-31.8016	0.681984	Dengue	QC	NaN	NaN	NaN	51.1527	0.120304
Dengue / QC	_HRQGPVNLLSDPEQGVEVTGQYEREK_	Q14624	0.811283	0.811283	9.72282e-06	1.4756e-05	170	Q14624	ITIH4	Inter-alpha-trypsin inhibitor heavy chain H4	ITIH4_HUMAN	1	75.4771	1.75477	Dengue	QC	NaN	NaN	NaN	142.935	0.16103
Dengue / QC	_KC[Carbamidomethyl (C)]YFPYLENGYNQNHGRK_	Q5TFM2	2.15441	2.15441	9.75969e-06	1.48081e-05	36	Q5TFM2	CFH	Complement factor H	Q5TFM2_HUMAN	1	345.187	4.45187	Dengue	QC	NaN	NaN	NaN	13.6009	0.300287
Dengue / QC	_IALGGLLFPASNLRLPLVPALDGC[Carbamidomethyl (C)]LRR_	I3L145;P04278	0.86227	0.86227	9.79356e-06	1.48557e-05	88	I3L145;P04278	SHBG	Sex hormone-binding globulin	I3L145_HUMAN;SHBG_HUMAN	1	81.7896	1.8179	Dengue	QC	NaN	NaN	NaN	61.7057	0.203036
Dengue / QC	_SSSGLTYIAEWK_	P33908	0.751773	0.751773	9.90825e-06	1.50065e-05	30	P33908	MAN1A1	Mannosyl-oligosaccharide 1,2-alpha-mannosidase IA	MA1A1_HUMAN	1	68.3861	1.68386	Dengue	QC	NaN	NaN	NaN	9.01819	0.0902591
Dengue / QC	_SVGSQWASPENPC[Carbamidomethyl (C)]LINEC[Carbamidomethyl (C)]VR_	P04275	0.597637	0.597637	9.91911e-06	1.50191e-05	108	P04275	VWF	von Willebrand factor	VWF_HUMAN	1	51.3236	1.51324	Dengue	QC	NaN	NaN	NaN	95.7299	0.124122
Dengue / QC	_LLIYGNSNRPSGVPDR_	P01703	-0.743903	0.743903	9.92486e-06	1.50239e-05	170	P01703	IGLV1-40	Immunoglobulin lambda variable 1-40	LV140_HUMAN	1	-40.2878	0.597122	Dengue	QC	NaN	NaN	NaN	49.6977	0.149776
Dengue / QC	_SEDC[Carbamidomethyl (C)]FILDHGK_	P06396	0.369234	0.369234	9.99711e-06	1.51099e-05	90	P06396	GSN	Gelsolin	GELS_HUMAN	1	29.1667	1.29167	Dengue	QC	NaN	NaN	NaN	54.597	0.0750595
Dengue / QC	_IYEDHDATQQLQGFYSQVAK_	P19827	0.309476	0.309476	1.02756e-05	1.55109e-05	128	P19827	ITIH1	Inter-alpha-trypsin inhibitor heavy chain H1	ITIH1_HUMAN	1	23.9258	1.23926	Dengue	QC	NaN	NaN	NaN	111.056	0.0606992
Dengue / QC	_TLSLPELEQQQEQQQEQQQEQVQMLAPLES_	P06727	0.426893	0.426893	1.04272e-05	1.57277e-05	114	P06727	APOA4	Apolipoprotein A-IV	APOA4_HUMAN	1	34.4335	1.34434	Dengue	QC	NaN	NaN	NaN	99.1118	0.0928136
Dengue / QC	_NPDAVAAPYC[Carbamidomethyl (C)]YTRDPGVR_	P08519	2.52725	2.52725	1.04521e-05	1.57532e-05	18	P08519	LPA	Apolipoprotein(a)	APOA_HUMAN	1	476.47	5.7647	Dengue	QC	NaN	NaN	NaN	10.3448	0.285983
Dengue / QC	_QEELC[Carbamidomethyl (C)]LAR_	P02753;Q5VY30	0.519872	0.519872	1.04568e-05	1.57561e-05	156	P02753;Q5VY30	RBP4	Retinol-binding protein 4;Retinol binding protein 4, plasma, isoform CRA_b	RET4_HUMAN;Q5VY30_HUMAN	1	43.3828	1.43383	Dengue	QC	NaN	NaN	NaN	75.3087	0.0979508
Dengue / QC	_HSTIFENLANK_	P02787	-0.341307	0.341307	1.06671e-05	1.60402e-05	176	P02787	TF	Serotransferrin	TRFE_HUMAN	1	-21.0674	0.789326	Dengue	QC	NaN	NaN	NaN	96.7682	0.0668183
Dengue / QC	_QPSSAFAAFVK_	P01024	-0.384958	0.384958	1.0755e-05	1.61558e-05	164	P01024	C3	Complement C3	CO3_HUMAN	1	-23.4199	0.765801	Dengue	QC	NaN	NaN	NaN	98.0767	0.0740712
Dengue / QC	_C[Carbamidomethyl (C)]RGQSISVTSIRPC[Carbamidomethyl (C)]AAETQ_	P10643	0.896354	0.896354	1.09451e-05	1.6408e-05	126	P10643	C7	Complement component C7	CO7_HUMAN	1	86.1355	1.86136	Dengue	QC	NaN	NaN	NaN	117.587	0.171165
Dengue / QC	_MHSM[Oxidation (M)]NGFMYGNQPGLTMC[Carbamidomethyl (C)]K_	P00450	0.502842	0.502842	1.09546e-05	1.64138e-05	18	P00450	CP	Ceruloplasmin	CERU_HUMAN	1	41.7002	1.417	Dengue	QC	NaN	NaN	NaN	12.9303	0.167008
Dengue / QC	_SC[Carbamidomethyl (C)]VNAIPDQC[Carbamidomethyl (C)]SPLPC[Carbamidomethyl (C)]NEDGYMSC[Carbamidomethyl (C)]KDGK_	P07225	0.552872	0.552872	1.11339e-05	1.66642e-05	174	P07225	PROS1	Vitamin K-dependent protein S	PROS_HUMAN	1	46.7003	1.467	Dengue	QC	NaN	NaN	NaN	163.778	0.106287
Dengue / QC	_ANRPFLVFIREVPLNTIIFM[Oxidation (M)]GR_	P01008	1.79192	1.79192	1.11359e-05	1.66642e-05	82	P01008	SERPINC1	Antithrombin-III	ANT3_HUMAN	1	246.275	3.46275	Dengue	QC	NaN	NaN	NaN	38.5456	0.243836
Dengue / QC	_VSSFLPWIR_	P08311	0.782393	0.782393	1.13335e-05	1.69384e-05	62	P08311	CTSG	Cathepsin G	CATG_HUMAN	1	71.9982	1.71998	Dengue	QC	NaN	NaN	NaN	34.2281	0.252299
Dengue / QC	_SFNRGEC[Carbamidomethyl (C)]_	P01834	0.413188	0.413188	1.15091e-05	1.71659e-05	176	P01834	IGKC	Immunoglobulin kappa constant	IGKC_HUMAN	1	33.1625	1.33163	Dengue	QC	NaN	NaN	NaN	153.804	0.116899
Dengue / QC	_QITVNDLPVGR_	P32119	0.407456	0.407456	1.15609e-05	1.72094e-05	116	P32119	PRDX2	Peroxiredoxin-2	PRDX2_HUMAN	1	32.6345	1.32635	Dengue	QC	NaN	NaN	NaN	109.85	0.0820269
Dengue / QC	_RLAVYQAGAR_	P02649	0.934522	0.934522	1.1614e-05	1.72733e-05	60	P02649	APOE	Apolipoprotein E	APOE_HUMAN	1	91.1257	1.91126	Dengue	QC	NaN	NaN	NaN	49.2311	0.194519
Dengue / QC	_LLIYDNNKRPSGIPDR_	P01701	-0.425389	0.425389	1.16797e-05	1.73456e-05	162	P01701	IGLV1-51	Immunoglobulin lambda variable 1-51	LV151_HUMAN	1	-25.5362	0.744638	Dengue	QC	NaN	NaN	NaN	96.107	0.092936
Dengue / QC	_SYTITGLQPGTDYKIYLYTLNDNAR_	P02751;P02751-15;P02751-3;P02751-7	1.90822	1.90822	1.16829e-05	1.7346e-05	26	P02751;P02751-15;P02751-3;P02751-7	FN1	Fibronectin;Isoform 15 of Fibronectin;Isoform 3 of Fibronectin;Isoform 7 of Fibronectin	FINC_HUMAN	1	275.345	3.75345	Dengue	QC	NaN	NaN	NaN	20.1668	0.229151
Dengue / QC	_GPDFFTR_	P20160	1.1455	1.1455	1.17768e-05	1.74721e-05	34	P20160	AZU1	Azurocidin	CAP7_HUMAN	1	121.222	2.21222	Dengue	QC	NaN	NaN	NaN	23.2973	0.234596
Dengue / QC	_GQELC[Carbamidomethyl (C)]ADYSENTFTEYKK_	P02774;P02774-3	0.666353	0.666353	1.18361e-05	1.75468e-05	42	P02774;P02774-3	GC	Vitamin D-binding protein;Isoform 3 of Vitamin D-binding protein	VTDB_HUMAN	1	58.7056	1.58706	Dengue	QC	NaN	NaN	NaN	8.57133	0.0733877
Dengue / QC	_LLIYDASSLESGVPSR_	A0A0B4J2D9;P0DP09	-0.677911	0.677911	1.18945e-05	1.76109e-05	144	A0A0B4J2D9;P0DP09	IGKV1D-13;IGKV1-13	Immunoglobulin kappa variable 1D-13;Immunoglobulin kappa variable 1-13	KVD13_HUMAN;KV113_HUMAN	1	-37.493	0.62507	Dengue	QC	NaN	NaN	NaN	126.158	0.152084
Dengue / QC	_GQGTLSVVTMYHAK_	P01024	-0.296426	0.296426	1.21572e-05	1.79641e-05	176	P01024	C3	Complement C3	CO3_HUMAN	1	-18.5733	0.814267	Dengue	QC	NaN	NaN	NaN	74.4003	0.0560902
Dengue / QC	_GATDNKGPVLAWINAVSAFR_	Q96KN2	0.633182	0.633182	1.24019e-05	1.82889e-05	68	Q96KN2	CNDP1	Beta-Ala-His dipeptidase	CNDP1_HUMAN	1	55.0983	1.55098	Dengue	QC	NaN	NaN	NaN	56.8599	0.0971967
Dengue / QC	_VDVQAGAC[Carbamidomethyl (C)]EGKLELSVDGAK_	P0C0L5	0.839786	0.839786	1.25225e-05	1.84575e-05	136	P0C0L5	C4B	Complement C4-B	CO4B_HUMAN	1	78.9785	1.78979	Dengue	QC	NaN	NaN	NaN	107.405	0.154856
Dengue / QC	_DEPTYILNIK_	P04114	0.44912	0.44912	1.30009e-05	1.91148e-05	68	P04114	APOB	Apolipoprotein B-100	APOB_HUMAN	1	36.5208	1.36521	Dengue	QC	NaN	NaN	NaN	46.6646	0.138537
Dengue / QC	_LNRVNDAQEYR_	Q9UGM5	0.670391	0.670391	1.32061e-05	1.93729e-05	28	Q9UGM5	FETUB	Fetuin-B	FETUB_HUMAN	1	59.1505	1.5915	Dengue	QC	NaN	NaN	NaN	15.0954	0.1786
Dengue / QC	_SASNM[Oxidation (M)]AIVDVK_	P01023	-0.489902	0.489902	1.33861e-05	1.95933e-05	176	P01023	A2M	Alpha-2-macroglobulin	A2MG_HUMAN	1	-28.7927	0.712073	Dengue	QC	NaN	NaN	NaN	59.2113	0.1073
Dengue / QC	_C[Carbamidomethyl (C)]PPPPLPINSK_	P05160	0.351101	0.351101	1.33863e-05	1.95933e-05	104	P05160	F13B	Coagulation factor XIII B chain	F13B_HUMAN	1	27.5533	1.27553	Dengue	QC	NaN	NaN	NaN	53.2291	0.112559
Dengue / QC	_GDEC[Carbamidomethyl (C)]QLC[Carbamidomethyl (C)]EVENR_	O75882;O75882-2	0.501239	0.501239	1.34491e-05	1.96705e-05	102	O75882;O75882-2	ATRN	Attractin;Isoform 2 of Attractin	ATRN_HUMAN	1	41.5429	1.41543	Dengue	QC	NaN	NaN	NaN	18.7174	0.108875
Dengue / QC	_TLNQPDSQLQLTTGNGLFLSEGLK_	P01009	0.382154	0.382154	1.35604e-05	1.98087e-05	142	P01009	SERPINA1	Alpha-1-antitrypsin	A1AT_HUMAN	1	30.3286	1.30329	Dengue	QC	NaN	NaN	NaN	137.788	0.0997322
Dengue / QC	_YKEENDDFASFR_	P04196	-0.227896	0.227896	1.37365e-05	2.0041e-05	176	P04196	HRG	Histidine-rich glycoprotein	HRG_HUMAN	1	-14.612	0.85388	Dengue	QC	NaN	NaN	NaN	72.5357	0.0546025
Dengue / QC	_KC[Carbamidomethyl (C)]YFPYLENGYNQNYGRK_	P08603	0.567933	0.567933	1.37521e-05	2.00538e-05	132	P08603	CFH	Complement factor H	CFAH_HUMAN	1	48.2398	1.4824	Dengue	QC	NaN	NaN	NaN	73.2475	0.0965351
Dengue / QC	_AIPDLTAPVAAVQAAVSNLVR_	P18206;P18206-2	0.866003	0.866003	1.375e-05	2.00538e-05	78	P18206;P18206-2	VCL	Vinculin;Isoform 1 of Vinculin	VINC_HUMAN	1	82.2606	1.82261	Dengue	QC	NaN	NaN	NaN	67.2963	0.180253
Dengue / QC	_FPETLMEIEIPIVDHSTC[Carbamidomethyl (C)]QK_	P48740	1.03146	1.03146	1.37885e-05	2.00947e-05	34	P48740	MASP1	Mannan-binding lectin serine protease 1	MASP1_HUMAN	1	104.409	2.04409	Dengue	QC	NaN	NaN	NaN	20.1762	0.195032
Dengue / QC	_MKDGLC[Carbamidomethyl (C)]VPRK_	O95445	1.23516	1.23516	1.38353e-05	2.01552e-05	28	O95445	APOM	Apolipoprotein M	APOM_HUMAN	1	135.407	2.35407	Dengue	QC	NaN	NaN	NaN	23.7719	0.190629
Dengue / QC	_A[Acetyl (Protein N-term)]NRGPAYGLSR_	P37802;X6RJP6	1.86643	1.86643	1.39134e-05	2.0254e-05	24	P37802;X6RJP6	TAGLN2	Transgelin-2;Transgelin-2 (Fragment)	TAGL2_HUMAN;X6RJP6_HUMAN	1	264.63	3.6463	Dengue	QC	NaN	NaN	NaN	17.4191	0.319925
Dengue / QC	_NWGLGGHAFC[Carbamidomethyl (C)]R_	P00748	-0.314689	0.314689	1.42536e-05	2.07144e-05	150	P00748	F12	Coagulation factor XII	FA12_HUMAN	1	-19.5976	0.804024	Dengue	QC	NaN	NaN	NaN	69.3313	0.0645819
Dengue / QC	_IWDVVEK_	P01024	-0.255628	0.255628	1.43743e-05	2.0863e-05	176	P01024	C3	Complement C3	CO3_HUMAN	1	-16.2378	0.837622	Dengue	QC	NaN	NaN	NaN	59.1995	0.0556576
Dengue / QC	_MYYSAVDPTK_	P00450	-0.552076	0.552076	1.43692e-05	2.0863e-05	158	P00450	CP	Ceruloplasmin	CERU_HUMAN	1	-31.7962	0.682038	Dengue	QC	NaN	NaN	NaN	55.4466	0.111921
Dengue / QC	_FTC[Carbamidomethyl (C)]AC[Carbamidomethyl (C)]PDQFK_	Q14520;Q14520-2	0.34089	0.34089	1.43724e-05	2.0863e-05	100	Q14520;Q14520-2	HABP2	Hyaluronan-binding protein 2;Isoform 2 of Hyaluronan-binding protein 2	HABP2_HUMAN	1	26.6537	1.26654	Dengue	QC	NaN	NaN	NaN	81.528	0.06303
Dengue / QC	_AGLAASLAGPHSIVGR_	P08294	1.71337	1.71337	1.4712e-05	2.13163e-05	20	P08294	SOD3	Extracellular superoxide dismutase [Cu-Zn]	SODE_HUMAN	1	227.927	3.27927	Dengue	QC	NaN	NaN	NaN	12.9865	0.218699
Dengue / QC	_DM[Oxidation (M)]YSFLEDMGLK_	P01023	2.98963	2.98963	1.49423e-05	2.16233e-05	68	P01023	A2M	Alpha-2-macroglobulin	A2MG_HUMAN	1	694.271	7.94271	Dengue	QC	NaN	NaN	NaN	32.5298	0.321674
Dengue / QC	_AFIQLWAFDAVKGK_	P02760	1.46589	1.46589	1.5258e-05	2.20368e-05	130	P02760	AMBP	Protein AMBP	AMBP_HUMAN	1	176.233	2.76233	Dengue	QC	NaN	NaN	NaN	90.7869	0.219226
Dengue / QC	_TERELLESYIDGR_	P00734	0.422597	0.422597	1.53409e-05	2.21457e-05	34	P00734	F2	Prothrombin	THRB_HUMAN	1	34.0338	1.34034	Dengue	QC	NaN	NaN	NaN	24.8627	0.100465
Dengue / QC	_M[Oxidation (M)]GPKGEPGDPVNLLR_	O75636	-0.468393	0.468393	1.53729e-05	2.21864e-05	170	O75636	FCN3	Ficolin-3	FCN3_HUMAN	1	-27.7231	0.722769	Dengue	QC	NaN	NaN	NaN	69.7962	0.107284
Dengue / QC	_TSESGTPSSSTPQENTISGYSLLTC[Carbamidomethyl (C)]K_	H0YAC1;P03952	0.242098	0.242098	1.54154e-05	2.22423e-05	148	H0YAC1;P03952	KLKB1	Plasma kallikrein (Fragment);Plasma kallikrein	H0YAC1_HUMAN;KLKB1_HUMAN	1	18.2711	1.18271	Dengue	QC	NaN	NaN	NaN	102.958	0.0744559
Dengue / QC	_TFTC[Carbamidomethyl (C)]TAAYPESKTPLTATLSK_	P01876	2.03296	2.03296	1.54389e-05	2.22653e-05	156	P01876	IGHA1	Immunoglobulin heavy constant alpha 1	IGHA1_HUMAN	1	309.243	4.09243	Dengue	QC	NaN	NaN	NaN	134.009	0.40271
Dengue / QC	_SLEDLQLTHNKITK_	P51884	0.539952	0.539952	1.56989e-05	2.26126e-05	124	P51884	LUM	Lumican	LUM_HUMAN	1	45.3924	1.45392	Dengue	QC	NaN	NaN	NaN	104.655	0.105599
Dengue / QC	_QPSSAFAAFVKR_	P01024	-0.482088	0.482088	1.57576e-05	2.26876e-05	174	P01024	C3	Complement C3	CO3_HUMAN	1	-28.4059	0.715941	Dengue	QC	NaN	NaN	NaN	57.671	0.105717
Dengue / QC	_LVTDLTK_	P02768	-0.354457	0.354457	1.58901e-05	2.28711e-05	176	P02768	ALB	Serum albumin	ALBU_HUMAN	1	-21.7836	0.782164	Dengue	QC	NaN	NaN	NaN	44.1693	0.0784768
Dengue / QC	_SC[Carbamidomethyl (C)]GLHQLLRGPEVQLVAHSPWLKDSLSR_	P0C0L5	0.745761	0.745761	1.60274e-05	2.30463e-05	176	P0C0L5	C4B	Complement C4-B	CO4B_HUMAN	1	67.6859	1.67686	Dengue	QC	NaN	NaN	NaN	149.514	0.140503
Dengue / QC	_HRGVYSSDVFDIFPGTYQTLEMFPR_	P00450	0.638173	0.638173	1.60656e-05	2.30956e-05	176	P00450	CP	Ceruloplasmin	CERU_HUMAN	1	55.6357	1.55636	Dengue	QC	NaN	NaN	NaN	161.874	0.103732
Dengue / QC	_HPNVFGFC[Carbamidomethyl (C)]R_	P04196	-0.373849	0.373849	1.62153e-05	2.32879e-05	176	P04196	HRG	Histidine-rich glycoprotein	HRG_HUMAN	1	-22.8279	0.771721	Dengue	QC	NaN	NaN	NaN	62.968	0.0724092
Dengue / QC	_TC[Carbamidomethyl (C)]NHPVPQHGGPFC[Carbamidomethyl (C)]AGDATR_	P27918	0.429265	0.429265	1.65065e-05	2.36544e-05	146	P27918	CFP	Properdin	PROP_HUMAN	1	34.6547	1.34655	Dengue	QC	NaN	NaN	NaN	116.739	0.121263
Dengue / QC	_APGWDPLC[Carbamidomethyl (C)]WDEC[Carbamidomethyl (C)]R_	Q9Y6R7	1.27105	1.27105	1.67175e-05	2.39391e-05	76	Q9Y6R7	FCGBP	IgGFc-binding protein	FCGBP_HUMAN	1	141.336	2.41336	Dengue	QC	NaN	NaN	NaN	68.7179	0.255422
Dengue / QC	_LQDRGPDVLTATVSGK_	Q14624	-0.417446	0.417446	1.68543e-05	2.41292e-05	176	Q14624	ITIH4	Inter-alpha-trypsin inhibitor heavy chain H4	ITIH4_HUMAN	1	-25.1251	0.748749	Dengue	QC	NaN	NaN	NaN	50.459	0.089799
Dengue / QC	_EMEDTLNHLK_	A6XND0;P17936;P17936-2	0.623479	0.623479	1.71218e-05	2.44942e-05	104	A6XND0;P17936;P17936-2	IGFBP3	Insulin-like growth factor-binding protein 3;Insulin-like growth factor-binding protein 3;Isoform 2 of Insulin-like growth factor-binding protein 3	A6XND0_HUMAN;IBP3_HUMAN;IBP3_HUMAN	1	54.0586	1.54059	Dengue	QC	NaN	NaN	NaN	52.2286	0.204365
Dengue / QC	_YVVVSHTAGSSC[Carbamidomethyl (C)]NTPASC[Carbamidomethyl (C)]QQQAR_	O75594	1.23871	1.23871	1.73615e-05	2.47949e-05	24	O75594	PGLYRP1	Peptidoglycan recognition protein 1	PGRP1_HUMAN	1	135.987	2.35987	Dengue	QC	NaN	NaN	NaN	15.1195	0.253178
Dengue / QC	_SPC[Carbamidomethyl (C)]YGYQWVSEEHEEAHHTAYLVFSPSK_	P01023	-0.573309	0.573309	1.7472e-05	2.49286e-05	172	P01023	A2M	Alpha-2-macroglobulin	A2MG_HUMAN	1	-32.7926	0.672074	Dengue	QC	NaN	NaN	NaN	55.2342	0.120368
Dengue / QC	_NWETEITAQPDGGKTENC[Carbamidomethyl (C)]AVLSGAANGK_	E9PHK0;P05452	0.297477	0.297477	1.76677e-05	2.51772e-05	124	E9PHK0;P05452	CLEC3B	Tetranectin	E9PHK0_HUMAN;TETN_HUMAN	1	22.8993	1.22899	Dengue	QC	NaN	NaN	NaN	102.706	0.0655303
Dengue / QC	_GSFALSFPVESDVAPIAR_	P20742	1.22552	1.22552	1.76761e-05	2.51831e-05	122	P20742	PZP	Pregnancy zone protein	PZP_HUMAN	1	133.839	2.33839	Dengue	QC	NaN	NaN	NaN	91.9953	0.276422
Dengue / QC	_M[Oxidation (M)]FLSFPTTK_	P69905	0.515707	0.515707	1.78249e-05	2.53705e-05	162	P69905	HBA1	Hemoglobin subunit alpha	HBA_HUMAN	1	42.9694	1.42969	Dengue	QC	NaN	NaN	NaN	142.061	0.0864914
Dengue / QC	_TQSSDGKAQMQSPA_	H0YAC1;P03952	0.632723	0.632723	1.78455e-05	2.53937e-05	84	H0YAC1;P03952	KLKB1	Plasma kallikrein (Fragment);Plasma kallikrein	H0YAC1_HUMAN;KLKB1_HUMAN	1	55.0489	1.55049	Dengue	QC	NaN	NaN	NaN	51.6194	0.130358
Dengue / QC	_VQSTELC[Carbamidomethyl (C)]AGHLAGGTDSC[Carbamidomethyl (C)]QGDSGGPLVC[Carbamidomethyl (C)]FEKDK_	P00747	0.194571	0.194571	1.80043e-05	2.55887e-05	134	P00747	PLG	Plasminogen	PLMN_HUMAN	1	14.4384	1.14438	Dengue	QC	NaN	NaN	NaN	76.8391	0.0568105
Dengue / QC	_DTANLFPQTSLTLHMWPDTEGTFNVEC[Carbamidomethyl (C)]LTTDHYTGGMK_	P00450	0.539869	0.539869	1.80362e-05	2.56183e-05	148	P00450	CP	Ceruloplasmin	CERU_HUMAN	1	45.3841	1.45384	Dengue	QC	NaN	NaN	NaN	64.213	0.109698
Dengue / QC	_HQM[Oxidation (M)]DLVATLSQLGLQELFQAPDLR_	P08697	0.641796	0.641796	1.81398e-05	2.57502e-05	144	P08697	SERPINF2	Alpha-2-antiplasmin	A2AP_HUMAN	1	56.027	1.56027	Dengue	QC	NaN	NaN	NaN	110.006	0.110702
Dengue / QC	_EPQVYTLPPSRDELTKNQVSLTC[Carbamidomethyl (C)]LVK_	P01857	0.95654	0.95654	1.81359e-05	2.57502e-05	110	P01857	IGHG1	Immunoglobulin heavy constant gamma 1	IGHG1_HUMAN	1	94.0651	1.94065	Dengue	QC	NaN	NaN	NaN	99.6696	0.230802
Dengue / QC	_ILGGHLDAK_	P00738	-0.656773	0.656773	1.81556e-05	2.57664e-05	176	P00738	HP	Haptoglobin	HPT_HUMAN	1	-36.5705	0.634295	Dengue	QC	NaN	NaN	NaN	54.9711	0.157682
Dengue / QC	_AQTTVTC[Carbamidomethyl (C)]MENGWSPTPR_	P08603	0.280028	0.280028	1.83801e-05	2.60348e-05	176	P08603	CFH	Complement factor H	CFAH_HUMAN	1	21.4218	1.21422	Dengue	QC	NaN	NaN	NaN	120.747	0.0572579
Dengue / QC	_KEVYMPSSIFQDDFVIPDISEPGTWK_	P0C0L5	0.800102	0.800102	1.85329e-05	2.62449e-05	100	P0C0L5	C4B	Complement C4-B	CO4B_HUMAN	1	74.1224	1.74122	Dengue	QC	NaN	NaN	NaN	31.3101	0.14809
Dengue / QC	_GRTLEIPGNSDPNMIPDGDFNSYVR_	P0C0L5	0.966022	0.966022	1.86477e-05	2.63821e-05	170	P0C0L5	C4B	Complement C4-B	CO4B_HUMAN	1	95.3447	1.95345	Dengue	QC	NaN	NaN	NaN	157.979	0.166984
Dengue / QC	_AGFSWIEVTFKNPLVWVHASPEHVVVTR_	Q14624	0.617775	0.617775	1.88509e-05	2.6618e-05	158	Q14624	ITIH4	Inter-alpha-trypsin inhibitor heavy chain H4	ITIH4_HUMAN	1	53.4507	1.53451	Dengue	QC	NaN	NaN	NaN	89.4666	0.134936
Dengue / QC	_MYLGYEYVTAIR_	P02787	-0.38686	0.38686	1.91002e-05	2.69186e-05	176	P02787	TF	Serotransferrin	TRFE_HUMAN	1	-23.5208	0.764792	Dengue	QC	NaN	NaN	NaN	57.9583	0.0903953
Dengue / QC	_FPKAEFAEVSKLVTDLTK_	P02768	0.749049	0.749049	1.92706e-05	2.71394e-05	156	P02768	ALB	Serum albumin	ALBU_HUMAN	1	68.0685	1.68068	Dengue	QC	NaN	NaN	NaN	132.344	0.202822
Dengue / QC	_EAAC[Carbamidomethyl (C)]VWC[Carbamidomethyl (C)]NGEEYR_	G3XAK1;P26927	0.462828	0.462828	1.97034e-05	2.77157e-05	52	G3XAK1;P26927	MST1	Hepatocyte growth factor-like protein	G3XAK1_HUMAN;HGFL_HUMAN	1	37.824	1.37824	Dengue	QC	NaN	NaN	NaN	21.9146	0.118681
Dengue / QC	_NTGMETPTGVC[Carbamidomethyl (C)]AALAAAGVQPHSLDLSHNSLR_	P08571	0.341032	0.341032	2.00837e-05	2.82169e-05	114	P08571	CD14	Monocyte differentiation antigen CD14	CD14_HUMAN	1	26.6662	1.26666	Dengue	QC	NaN	NaN	NaN	51.2717	0.0985486
Dengue / QC	_NMATRPYSIHAHGVQTESSTVTPTLPGETLTYVWK_	P00450	-0.480522	0.480522	2.02705e-05	2.84726e-05	162	P00450	CP	Ceruloplasmin	CERU_HUMAN	1	-28.3282	0.716718	Dengue	QC	NaN	NaN	NaN	67.1908	0.0943317
Dengue / QC	_IVVVTAGVR_	P07195	-0.967224	0.967224	2.03669e-05	2.85812e-05	118	P07195	LDHB	L-lactate dehydrogenase B chain	LDHB_HUMAN	1	-48.8511	0.511489	Dengue	QC	NaN	NaN	NaN	102.001	0.20805
Dengue / QC	_LKC[Carbamidomethyl (C)]LAYDFYPGKIDVHWTR_	P25311	2.93006	2.93006	2.05265e-05	2.87758e-05	66	P25311	AZGP1	Zinc-alpha-2-glycoprotein	ZA2G_HUMAN	1	662.142	7.62142	Dengue	QC	NaN	NaN	NaN	48.8939	0.460872
Dengue / QC	_RGYQLSDVDGVTC[Carbamidomethyl (C)]EDIDEC[Carbamidomethyl (C)]ALPTGGHIC[Carbamidomethyl (C)]SYR_	P23142	0.752629	0.752629	2.05917e-05	2.88343e-05	142	P23142	FBLN1	Fibulin-1	FBLN1_HUMAN	1	68.486	1.68486	Dengue	QC	NaN	NaN	NaN	112.484	0.237853
Dengue / QC	_DLYANTVLSGGTTMYPGIADR_	P60709	0.282817	0.282817	2.07575e-05	2.90457e-05	92	P60709	ACTB	Actin, cytoplasmic 1	ACTB_HUMAN	1	21.6568	1.21657	Dengue	QC	NaN	NaN	NaN	82.4042	0.0922389
Dengue / QC	_LPPNVVEESAR_	P01023	-0.405491	0.405491	2.08356e-05	2.9148e-05	176	P01023	A2M	Alpha-2-macroglobulin	A2MG_HUMAN	1	-24.5021	0.754979	Dengue	QC	NaN	NaN	NaN	77.7577	0.0893028
Dengue / QC	_KIQALQQQADEAEDRAQGLQR_	P67936	0.967294	0.967294	2.08914e-05	2.92192e-05	32	P67936	TPM4	Tropomyosin alpha-4 chain	TPM4_HUMAN	1	95.517	1.95517	Dengue	QC	NaN	NaN	NaN	21.3952	0.163349
Dengue / QC	_QVGSGVTTDQVQAEAK_	P01871	-0.668673	0.668673	2.09322e-05	2.92693e-05	174	P01871	IGHM	Immunoglobulin heavy constant mu	IGHM_HUMAN	1	-37.0915	0.629085	Dengue	QC	NaN	NaN	NaN	50.9347	0.132698
Dengue / QC	_KLYDYC[Carbamidomethyl (C)]DVPQC[Carbamidomethyl (C)]AAPSFDC[Carbamidomethyl (C)]GKPQVEPK_	P00747	0.375692	0.375692	2.10874e-05	2.94653e-05	176	P00747	PLG	Plasminogen	PLMN_HUMAN	1	29.7462	1.29746	Dengue	QC	NaN	NaN	NaN	138.252	0.0743203
Dengue / QC	_GFNC[Carbamidomethyl (C)]ESKPEAEETC[Carbamidomethyl (C)]FDK_	P02751;P02751-15;P02751-3;P02751-7	0.752315	0.752315	2.12073e-05	2.96188e-05	80	P02751;P02751-15;P02751-3;P02751-7	FN1	Fibronectin;Isoform 15 of Fibronectin;Isoform 3 of Fibronectin;Isoform 7 of Fibronectin	FINC_HUMAN	1	68.4494	1.68449	Dengue	QC	NaN	NaN	NaN	70.2	0.176133
Dengue / QC	_YKDGDQC[Carbamidomethyl (C)]ETSPC[Carbamidomethyl (C)]QNQGK_	P00742	0.891512	0.891512	2.16126e-05	3.01276e-05	70	P00742	F10	Coagulation factor X	FA10_HUMAN	1	85.5119	1.85512	Dengue	QC	NaN	NaN	NaN	35.9791	0.126819
Dengue / QC	_AEAQAQYSAAVAK_	Q14624	-0.500178	0.500178	2.17354e-05	3.02773e-05	176	Q14624	ITIH4	Inter-alpha-trypsin inhibitor heavy chain H4	ITIH4_HUMAN	1	-29.2981	0.707019	Dengue	QC	NaN	NaN	NaN	45.2295	0.115596
Dengue / QC	_GQVVKGSVFLRNPSR_	P0C0L5	0.742137	0.742137	2.18447e-05	3.04211e-05	156	P0C0L5	C4B	Complement C4-B	CO4B_HUMAN	1	67.2652	1.67265	Dengue	QC	NaN	NaN	NaN	99.1862	0.116126
Dengue / QC	_TDASDVKPC[Carbamidomethyl (C)]_	P02749	0.464901	0.464901	2.193e-05	3.05123e-05	106	P02749	APOH	Beta-2-glycoprotein 1	APOH_HUMAN	1	38.0223	1.38022	Dengue	QC	NaN	NaN	NaN	80.2299	0.108972
Dengue / QC	_SSGLPNIPVQTISR_	G3V0E5;P02786	-0.697942	0.697942	2.20084e-05	3.06068e-05	156	G3V0E5;P02786	TFRC	Transferrin receptor (P90, CD71), isoform CRA_c;Transferrin receptor protein 1	G3V0E5_HUMAN;TFR1_HUMAN	1	-38.3549	0.616451	Dengue	QC	NaN	NaN	NaN	41.9238	0.146704
Dengue / QC	_MESLGITSR_	P07357	-0.256472	0.256472	2.21345e-05	3.07677e-05	176	P07357	C8A	Complement component C8 alpha chain	CO8A_HUMAN	1	-16.2867	0.837133	Dengue	QC	NaN	NaN	NaN	63.6869	0.0594776
Dengue / QC	_RLGNGVQC[Carbamidomethyl (C)]LAMGWGLLGR_	P08246	2.21649	2.21649	2.22541e-05	3.0912e-05	26	P08246	ELANE	Neutrophil elastase	ELNE_HUMAN	1	364.762	4.64762	Dengue	QC	NaN	NaN	NaN	13.5452	0.326996
Dengue / QC	_QAPGQELGWMGR_	A0A075B7D0	-0.377186	0.377186	2.24322e-05	3.113e-05	176	A0A075B7D0	IGHV1OR15-1	Immunoglobulin heavy variable 1/OR15-1 (non-functional) (Fragment)	A0A075B7D0_HUMAN	1	-23.0062	0.769938	Dengue	QC	NaN	NaN	NaN	136.352	0.0807164
Dengue / QC	_ELNQAGQETLVTGWGYHSSR_	E7END6;P04070;P04070-2	0.313329	0.313329	2.24601e-05	3.11613e-05	136	E7END6;P04070;P04070-2	PROC	Vitamin K-dependent protein C;Vitamin K-dependent protein C;Isoform 2 of Vitamin K-dependent protein C	E7END6_HUMAN;PROC_HUMAN;PROC_HUMAN	1	24.2572	1.24257	Dengue	QC	NaN	NaN	NaN	76.1328	0.0597893
Dengue / QC	_FLHVPDTFEGHFDGVPVISKGQQK_	P19823	2.01601	2.01601	2.24782e-05	3.11791e-05	90	P19823	ITIH2	Inter-alpha-trypsin inhibitor heavy chain H2	ITIH2_HUMAN	1	304.463	4.04463	Dengue	QC	NaN	NaN	NaN	75.3994	0.346641
Dengue / QC	_WEM[Oxidation (M)]PFDPQDTHQSR_	P01011	1.44275	1.44275	2.27612e-05	3.15122e-05	28	P01011	SERPINA3	Alpha-1-antichymotrypsin	AACT_HUMAN	1	171.838	2.71838	Dengue	QC	NaN	NaN	NaN	22.8509	0.262453
Dengue / QC	_GFYFSRPASR_	P01344;P01344-3	0.316019	0.316019	2.27719e-05	3.15196e-05	136	P01344;P01344-3	IGF2	Insulin-like growth factor II;Isoform 3 of Insulin-like growth factor II	IGF2_HUMAN	1	24.489	1.24489	Dengue	QC	NaN	NaN	NaN	56.8903	0.0905964
Dengue / QC	_FSGQLNSHGC[Carbamidomethyl (C)]FYQQVK_	P01023	-0.494639	0.494639	2.2813e-05	3.15691e-05	176	P01023	A2M	Alpha-2-macroglobulin	A2MG_HUMAN	1	-29.0261	0.709739	Dengue	QC	NaN	NaN	NaN	58.1269	0.103798
Dengue / QC	_EDPQTFYYAVAVVKK_	P02787	-0.244631	0.244631	2.29013e-05	3.16763e-05	176	P02787	TF	Serotransferrin	TRFE_HUMAN	1	-15.5968	0.844032	Dengue	QC	NaN	NaN	NaN	85.5933	0.0550219
Dengue / QC	_DNSKNSLYLQMNSLR_	A0A0B4J1X8	-0.307731	0.307731	2.29343e-05	3.17145e-05	174	A0A0B4J1X8	IGHV3-43	Immunoglobulin heavy variable 3-43	HV343_HUMAN	1	-19.2089	0.807911	Dengue	QC	NaN	NaN	NaN	69.7083	0.10595
Dengue / QC	_LPLEYSYGEYRDLFR_	P07358	0.516328	0.516328	2.2945e-05	3.1722e-05	82	P07358	C8B	Complement component C8 beta chain	CO8B_HUMAN	1	43.031	1.43031	Dengue	QC	NaN	NaN	NaN	69.791	0.0999273
Dengue / QC	_IEDGFSLKEQLQDMGLVDLFSPEK_	P01008	0.299018	0.299018	2.3239e-05	3.21208e-05	162	P01008	SERPINC1	Antithrombin-III	ANT3_HUMAN	1	23.0307	1.23031	Dengue	QC	NaN	NaN	NaN	45.1891	0.168637
Dengue / QC	_KYLDSTFTK_	A0A0A0MRJ7;P12259	0.34303	0.34303	2.34264e-05	3.23418e-05	34	A0A0A0MRJ7;P12259	F5	Coagulation factor V	A0A0A0MRJ7_HUMAN;FA5_HUMAN	1	26.8418	1.26842	Dengue	QC	NaN	NaN	NaN	29.45	0.127873
Dengue / QC	_STGGAPTFNVTVTK_	P07737	0.438506	0.438506	2.34633e-05	3.23851e-05	102	P07737	PFN1	Profilin-1	PROF1_HUMAN	1	35.52	1.3552	Dengue	QC	NaN	NaN	NaN	95.1227	0.096801
Dengue / QC	_SDIAPVAR_	P01023	-0.368391	0.368391	2.35524e-05	3.24929e-05	176	P01023	A2M	Alpha-2-macroglobulin	A2MG_HUMAN	1	-22.5354	0.774646	Dengue	QC	NaN	NaN	NaN	111.005	0.0863319
Dengue / QC	_ADSSPVKAGVETTTPSKQSNNK_	P0DOY2	1.96915	1.96915	2.38352e-05	3.28446e-05	88	P0DOY2	IGLC2	Immunoglobulin lambda constant 2	IGLC2_HUMAN	1	291.537	3.91537	Dengue	QC	NaN	NaN	NaN	73.2789	0.289937
Dengue / QC	_FSGSLLGGK_	P04211	-0.428046	0.428046	2.39494e-05	3.29788e-05	174	P04211	IGLV7-43	Immunoglobulin lambda variable 7-43	LV743_HUMAN	1	-25.6732	0.743268	Dengue	QC	NaN	NaN	NaN	69.4751	0.0887341
Dengue / QC	_HLIVTPSGC[Carbamidomethyl (C)]GEQNM[Oxidation (M)]IGMTPTVIAVHYLDETEQWEK_	P01024	1.39736	1.39736	2.39797e-05	3.30128e-05	26	P01024	C3	Complement C3	CO3_HUMAN	1	163.42	2.6342	Dengue	QC	NaN	NaN	NaN	13.788	0.223702
Dengue / QC	_TRFVYHLSDLC[Carbamidomethyl (C)]KK_	P01591	1.70442	1.70442	2.39869e-05	3.30149e-05	82	P01591	JCHAIN	Immunoglobulin J chain	IGJ_HUMAN	1	225.898	3.25898	Dengue	QC	NaN	NaN	NaN	69.2301	0.278747
Dengue / QC	_SGTHTLPVESGDMK_	P20742	2.88155	2.88155	2.42363e-05	3.33349e-05	98	P20742	PZP	Pregnancy zone protein	PZP_HUMAN	1	636.94	7.3694	Dengue	QC	NaN	NaN	NaN	68.5764	0.615024
Dengue / QC	_YKATLLDIYK_	P01031	0.720335	0.720335	2.43207e-05	3.34275e-05	32	P01031	C5	Complement C5	CO5_HUMAN	1	64.7564	1.64756	Dengue	QC	NaN	NaN	NaN	17.7937	0.143009
Dengue / QC	_LLNLDGTC[Carbamidomethyl (C)]ADSYSFVFSR_	P02753;Q5VY30	0.467616	0.467616	2.43809e-05	3.35024e-05	154	P02753;Q5VY30	RBP4	Retinol-binding protein 4;Retinol binding protein 4, plasma, isoform CRA_b	RET4_HUMAN;Q5VY30_HUMAN	1	38.2822	1.38282	Dengue	QC	NaN	NaN	NaN	96.5284	0.117653
Dengue / QC	_TIVRFNRPFLMIIVPTDTQNIFFM[Oxidation (M)]SK_	P01011	0.77024	0.77024	2.44482e-05	3.3587e-05	106	P01011	SERPINA3	Alpha-1-antichymotrypsin	AACT_HUMAN	1	70.5553	1.70555	Dengue	QC	NaN	NaN	NaN	74.1172	0.193337
Dengue / QC	_TVIEVDERGTEAVAGILSEITAYSMPPVIK_	G3V2W1;Q9UK55	0.796533	0.796533	2.45348e-05	3.36981e-05	28	G3V2W1;Q9UK55	SERPINA10	Protein Z-dependent protease inhibitor	G3V2W1_HUMAN;ZPI_HUMAN	1	73.6922	1.73692	Dengue	QC	NaN	NaN	NaN	7.42188	0.116191
Dengue / QC	_DGAGDVAFVK_	P02787	-0.29193	0.29193	2.4679e-05	3.38804e-05	176	P02787	TF	Serotransferrin	TRFE_HUMAN	1	-18.3192	0.816808	Dengue	QC	NaN	NaN	NaN	66.5176	0.071336
Dengue / QC	_TC[Carbamidomethyl (C)]QSLHINEMC[Carbamidomethyl (C)]QER_	P04275	1.94548	1.94548	2.47131e-05	3.39192e-05	28	P04275	VWF	von Willebrand factor	VWF_HUMAN	1	285.166	3.85166	Dengue	QC	NaN	NaN	NaN	20.5878	0.387068
Dengue / QC	_SQFVQPIC[Carbamidomethyl (C)]LPEPGSTFPAGHK_	Q04756	0.216319	0.216319	2.48903e-05	3.41387e-05	138	Q04756	HGFAC	Hepatocyte growth factor activator	HGFA_HUMAN	1	16.1765	1.16177	Dengue	QC	NaN	NaN	NaN	103.685	0.0714051
Dengue / QC	_QAPGQGLEWMGWINTNTGNPTYAQGFTGR_	A0A0J9YVY3	2.41441	2.41441	2.49144e-05	3.41637e-05	20	A0A0J9YVY3	IGHV7-4-1	Immunoglobulin heavy variable 7-4-1	HV741_HUMAN	1	433.103	5.33103	Dengue	QC	NaN	NaN	NaN	9.52212	0.249547
Dengue / QC	_SLLSNVEGDNAVPMQHNNRPTQPLKGR_	P00915	2.08816	2.08816	2.49225e-05	3.41668e-05	66	P00915	CA1	Carbonic anhydrase 1	CAH1_HUMAN	1	325.205	4.25205	Dengue	QC	NaN	NaN	NaN	53.9955	0.300269
Dengue / QC	_SDVM[Oxidation (M)]YTDWK_	P19652	-0.559913	0.559913	2.49719e-05	3.42027e-05	164	P19652	ORM2	Alpha-1-acid glycoprotein 2	A1AG2_HUMAN	1	-32.1657	0.678343	Dengue	QC	NaN	NaN	NaN	50.0175	0.121009
Dengue / QC	_IC[Carbamidomethyl (C)]LDPDAPR_	P02775	-0.322553	0.322553	2.4999e-05	3.42318e-05	176	P02775	PPBP	Platelet basic protein	CXCL7_HUMAN	1	-20.0346	0.799654	Dengue	QC	NaN	NaN	NaN	80.6579	0.0741714
Dengue / QC	_KVLLDGVQNPR_	P01024	-0.44808	0.44808	2.50444e-05	3.42859e-05	176	P01024	C3	Complement C3	CO3_HUMAN	1	-26.6983	0.733017	Dengue	QC	NaN	NaN	NaN	56.2023	0.105908
Dengue / QC	_M[Oxidation (M)]GLAFESTK_	P04114	0.271796	0.271796	2.51128e-05	3.43557e-05	34	P04114	APOB	Apolipoprotein B-100	APOB_HUMAN	1	20.731	1.20731	Dengue	QC	NaN	NaN	NaN	13.696	0.195805
Dengue / QC	_ASEQAELPR_	Q86UD1	0.530303	0.530303	2.51498e-05	3.43903e-05	74	Q86UD1	OAF	Out at first protein homolog	OAF_HUMAN	1	44.4233	1.44423	Dengue	QC	NaN	NaN	NaN	65.8941	0.134071
Dengue / QC	_YLYEIARR_	P02768	-0.335032	0.335032	2.54387e-05	3.47312e-05	176	P02768	ALB	Serum albumin	ALBU_HUMAN	1	-20.7234	0.792766	Dengue	QC	NaN	NaN	NaN	44.4906	0.076905
Dengue / QC	_SNLC[Carbamidomethyl (C)]ALC[Carbamidomethyl (C)]IGDEQGENKC[Carbamidomethyl (C)]VPNSNER_	E7ER44;P02788	1.71681	1.71681	2.58201e-05	3.51924e-05	24	E7ER44;P02788	LTF	Lactotransferrin	E7ER44_HUMAN;TRFL_HUMAN	1	228.709	3.28709	Dengue	QC	NaN	NaN	NaN	12.3479	0.305811
Dengue / QC	_LQSLFDSPDFSKITGKPIK_	P36955	0.308924	0.308924	2.64118e-05	3.59323e-05	50	P36955	SERPINF1	Pigment epithelium-derived factor	PEDF_HUMAN	1	23.8784	1.23878	Dengue	QC	NaN	NaN	NaN	26.2163	0.101934
Dengue / QC	_TPSC[Carbamidomethyl (C)]GDIC[Carbamidomethyl (C)]NFPPK_	P04003	-0.323305	0.323305	2.65e-05	3.6044e-05	176	P04003	C4BPA	C4b-binding protein alpha chain	C4BPA_HUMAN	1	-20.0763	0.799237	Dengue	QC	NaN	NaN	NaN	63.4987	0.0742825
Dengue / QC	_GQESSTDIKAPEGFAVR_	Q9NZP8	-0.419307	0.419307	2.65687e-05	3.6129e-05	144	Q9NZP8	C1RL	Complement C1r subcomponent-like protein	C1RL_HUMAN	1	-25.2216	0.747784	Dengue	QC	NaN	NaN	NaN	50.3295	0.0860805
Dengue / QC	_WLGRYYC[Carbamidomethyl (C)]FQGNQFLR_	P02790	0.256271	0.256271	2.67102e-05	3.62962e-05	152	P02790	HPX	Hemopexin	HEMO_HUMAN	1	19.4387	1.19439	Dengue	QC	NaN	NaN	NaN	103.881	0.0546236
Dengue / QC	_VVQGKEPAHLMSLFGGKPMIIYK_	P06396	0.325435	0.325435	2.68073e-05	3.64198e-05	118	P06396	GSN	Gelsolin	GELS_HUMAN	1	25.3042	1.25304	Dengue	QC	NaN	NaN	NaN	70.1495	0.0879505
Dengue / QC	_NTLYLQMGSLR_	A0A075B6Q5	-0.599711	0.599711	2.69105e-05	3.65516e-05	98	A0A075B6Q5	IGHV3-64	Immunoglobulin heavy variable 3-64	HV364_HUMAN	1	-34.0114	0.659886	Dengue	QC	NaN	NaN	NaN	73.5692	0.117003
Dengue / QC	_NTLELSNGVIVK_	P04114	0.433244	0.433244	2.70933e-05	3.67913e-05	114	P04114	APOB	Apolipoprotein B-100	APOB_HUMAN	1	35.0266	1.35027	Dengue	QC	NaN	NaN	NaN	100.998	0.104404
Dengue / QC	_TGAVSGHSLK_	H0YAC1;P03952	0.598492	0.598492	2.72055e-05	3.69353e-05	116	H0YAC1;P03952	KLKB1	Plasma kallikrein (Fragment);Plasma kallikrein	H0YAC1_HUMAN;KLKB1_HUMAN	1	51.4133	1.51413	Dengue	QC	NaN	NaN	NaN	45.7299	0.163883
Dengue / QC	_VVWC[Carbamidomethyl (C)]AVGEQELR_	E7ER44;P02788	1.16534	1.16534	2.74319e-05	3.72083e-05	62	E7ER44;P02788	LTF	Lactotransferrin	E7ER44_HUMAN;TRFL_HUMAN	1	124.286	2.24286	Dengue	QC	NaN	NaN	NaN	41.4754	0.246791
Dengue / QC	_LADFALLC[Carbamidomethyl (C)]LDGK_	E7ER44;P02788	1.02751	1.02751	2.77959e-05	3.76413e-05	56	E7ER44;P02788	LTF	Lactotransferrin	E7ER44_HUMAN;TRFL_HUMAN	1	103.851	2.03851	Dengue	QC	NaN	NaN	NaN	47.6492	0.237386
Dengue / QC	_KQTAC[Carbamidomethyl (C)]KPEIAYAYK_	P01031	3.03217	3.03217	2.8026e-05	3.79179e-05	34	P01031	C5	Complement C5	CO5_HUMAN	1	718.037	8.18037	Dengue	QC	NaN	NaN	NaN	19.7789	0.264462
Dengue / QC	_ARPHAWPFMVSLQLR_	P08246	1.49962	1.49962	2.83634e-05	3.83391e-05	56	P08246	ELANE	Neutrophil elastase	ELNE_HUMAN	1	182.769	2.82769	Dengue	QC	NaN	NaN	NaN	31.8446	0.40337
Dengue / QC	_DSVTETLPR_	P03951	0.738785	0.738785	2.86836e-05	3.87275e-05	40	P03951	F11	Coagulation factor XI	FA11_HUMAN	1	66.877	1.66877	Dengue	QC	NaN	NaN	NaN	29.0763	0.166825
Dengue / QC	_VSGYTFTDYYMHWVQQAPGK_	A0A0G2JMI3	1.37388	1.37388	2.87515e-05	3.88102e-05	36	A0A0G2JMI3	IGHV1-69-2	Immunoglobulin heavy variable 1-69-2	HV692_HUMAN	1	159.166	2.59166	Dengue	QC	NaN	NaN	NaN	20.4551	0.326536
Dengue / QC	_GKFC[Carbamidomethyl (C)]EIGSDDC[Carbamidomethyl (C)]YVGDGYSYR_	Q14520;Q14520-2	0.7369	0.7369	2.87873e-05	3.88497e-05	68	Q14520;Q14520-2	HABP2	Hyaluronan-binding protein 2;Isoform 2 of Hyaluronan-binding protein 2	HABP2_HUMAN	1	66.659	1.66659	Dengue	QC	NaN	NaN	NaN	59.5728	0.148507
Dengue / QC	_GIVEEC[Carbamidomethyl (C)]C[Carbamidomethyl (C)]FR_	P01344-2	0.28451	0.28451	2.891e-05	3.90063e-05	156	P01344-2	IGF2	Isoform 2 of Insulin-like growth factor II	IGF2_HUMAN	1	21.7996	1.218	Dengue	QC	NaN	NaN	NaN	105.399	0.067372
Dengue / QC	_AGALQLLLVGDKVPHDLDMLLR_	P55058	2.57688	2.57688	2.9007e-05	3.91192e-05	22	P55058	PLTP	Phospholipid transfer protein	PLTP_HUMAN	1	496.649	5.96649	Dengue	QC	NaN	NaN	NaN	14.1923	0.315006
Dengue / QC	_GFGSLNDEGEGEFWLGNDYLHLLTQR_	P02671	0.632779	0.632779	2.91152e-05	3.92562e-05	22	P02671	FGA	Fibrinogen alpha chain	FIBA_HUMAN	1	55.0549	1.55055	Dengue	QC	NaN	NaN	NaN	15.8601	0.189055
Dengue / QC	_LDVPVWDVEATLNFLK_	O00391	0.737769	0.737769	2.94806e-05	3.97124e-05	56	O00391	QSOX1	Sulfhydryl oxidase 1	QSOX1_HUMAN	1	66.7595	1.66759	Dengue	QC	NaN	NaN	NaN	9.78883	0.192604
Dengue / QC	_VRVELLHNPAFC[Carbamidomethyl (C)]SLATTKR_	P01024	0.529187	0.529187	2.97242e-05	4.00314e-05	166	P01024	C3	Complement C3	CO3_HUMAN	1	44.3116	1.44312	Dengue	QC	NaN	NaN	NaN	153.015	0.102551
Dengue / QC	_ISASAEELR_	P06727	0.416885	0.416885	2.97457e-05	4.0042e-05	162	P06727	APOA4	Apolipoprotein A-IV	APOA4_HUMAN	1	33.5042	1.33504	Dengue	QC	NaN	NaN	NaN	156.832	0.0937363
Dengue / QC	_HLIVTPSGC[Carbamidomethyl (C)]GEQNMIGM[Oxidation (M)]TPTVIAVHYLDETEQWEK_	P01024	0.880582	0.880582	2.98406e-05	4.01422e-05	44	P01024	C3	Complement C3	CO3_HUMAN	1	84.1118	1.84112	Dengue	QC	NaN	NaN	NaN	29.0305	0.196697
Dengue / QC	_DSDWPFC[Carbamidomethyl (C)]SDEDWNYKC[Carbamidomethyl (C)]PSGC[Carbamidomethyl (C)]R_	P02671	1.53293	1.53293	2.98646e-05	4.01631e-05	44	P02671	FGA	Fibrinogen alpha chain	FIBA_HUMAN	1	189.372	2.89372	Dengue	QC	NaN	NaN	NaN	36.0125	0.237793
Dengue / QC	_ARVQVVAGK_	P01042	0.779231	0.779231	3.02124e-05	4.06052e-05	42	P01042	KNG1	Kininogen-1	KNG1_HUMAN	1	71.6216	1.71622	Dengue	QC	NaN	NaN	NaN	35.5878	0.195671
Dengue / QC	_AIHLDLEEYR_	Q96KN2	0.399755	0.399755	3.03167e-05	4.07361e-05	86	Q96KN2	CNDP1	Beta-Ala-His dipeptidase	CNDP1_HUMAN	1	31.9284	1.31928	Dengue	QC	NaN	NaN	NaN	79.6719	0.104916
Dengue / QC	_TVAAPSVFIFPPSDEQLK_	P01834	-0.514567	0.514567	3.04098e-05	4.08333e-05	176	P01834	IGKC	Immunoglobulin kappa constant	IGKC_HUMAN	1	-29.9997	0.700003	Dengue	QC	NaN	NaN	NaN	64.4693	0.103464
Dengue / QC	_TVVQPSVGAAAGPVVPPC[Carbamidomethyl (C)]PGR_	P02765	0.432976	0.432976	3.0803e-05	4.12952e-05	176	P02765	AHSG	Alpha-2-HS-glycoprotein	FETUA_HUMAN	1	35.0016	1.35002	Dengue	QC	NaN	NaN	NaN	159.184	0.0926012
Dengue / QC	_AFQYHSK_	P00747	0.667072	0.667072	3.09966e-05	4.15359e-05	110	P00747	PLG	Plasminogen	PLMN_HUMAN	1	58.7847	1.58785	Dengue	QC	NaN	NaN	NaN	39.6386	0.212679
Dengue / QC	_FSGSNSGNTATLTISR_	A0A075B6K5	-0.616366	0.616366	3.09918e-05	4.15359e-05	176	A0A075B6K5	IGLV3-9	Immunoglobulin lambda variable 3-9	LV39_HUMAN	1	-34.7688	0.652312	Dengue	QC	NaN	NaN	NaN	64.6971	0.124969
Dengue / QC	_KLISVDTEHSNIYLQNGPDR_	P00450	-0.367152	0.367152	3.16629e-05	4.23515e-05	176	P00450	CP	Ceruloplasmin	CERU_HUMAN	1	-22.4688	0.775312	Dengue	QC	NaN	NaN	NaN	47.1053	0.0899104
Dengue / QC	_TQVNTQAEQLRR_	P06727	0.658756	0.658756	3.16991e-05	4.23834e-05	78	P06727	APOA4	Apolipoprotein A-IV	APOA4_HUMAN	1	57.872	1.57872	Dengue	QC	NaN	NaN	NaN	67.1047	0.141987
Dengue / QC	_LGLGADVAQVTGALR_	P14780	1.31948	1.31948	3.17325e-05	4.24158e-05	50	P14780	MMP9	Matrix metalloproteinase-9	MMP9_HUMAN	1	149.577	2.49577	Dengue	QC	NaN	NaN	NaN	38.0994	0.235555
Dengue / QC	_VSVFVPPRDGFFGNPR_	P01871	-0.661911	0.661911	3.17595e-05	4.24422e-05	176	P01871	IGHM	Immunoglobulin heavy constant mu	IGHM_HUMAN	1	-36.7959	0.632041	Dengue	QC	NaN	NaN	NaN	53.8996	0.134331
Dengue / QC	_C[Carbamidomethyl (C)]EELQGQK_	P27918	1.0889	1.0889	3.17735e-05	4.24513e-05	34	P27918	CFP	Properdin	PROP_HUMAN	1	112.711	2.12711	Dengue	QC	NaN	NaN	NaN	21.6933	0.154083
Dengue / QC	_YENC[Carbamidomethyl (C)]PKDNPMYYC[Carbamidomethyl (C)]NKK_	O75882;O75882-2	1.47495	1.47495	3.18095e-05	4.248e-05	30	O75882;O75882-2	ATRN	Attractin;Isoform 2 of Attractin	ATRN_HUMAN	1	177.974	2.77974	Dengue	QC	NaN	NaN	NaN	9.20279	0.255745
Dengue / QC	_C[Carbamidomethyl (C)]TSYPDGSWK_	P07996	0.427208	0.427208	3.19949e-05	4.26985e-05	96	P07996	THBS1	Thrombospondin-1	TSP1_HUMAN	1	34.4629	1.34463	Dengue	QC	NaN	NaN	NaN	32.4464	0.110266
Dengue / QC	_PVEEYANC[Carbamidomethyl (C)]HLAR_	P02787	1.54487	1.54487	3.20808e-05	4.27647e-05	54	P02787	TF	Serotransferrin	TRFE_HUMAN	1	191.778	2.91778	Dengue	QC	NaN	NaN	NaN	21.8051	0.8456
Dengue / QC	_YTKKVPQVSTPTLVEVSR_	P02768	1.51501	1.51501	3.24665e-05	4.32495e-05	176	P02768	ALB	Serum albumin	ALBU_HUMAN	1	185.801	2.85801	Dengue	QC	NaN	NaN	NaN	164.262	0.2971
Dengue / QC	_DTVIKPLLVEPEGLEK_	P01023	-0.444468	0.444468	3.28092e-05	4.36368e-05	176	P01023	A2M	Alpha-2-macroglobulin	A2MG_HUMAN	1	-26.5145	0.734855	Dengue	QC	NaN	NaN	NaN	69.75	0.0898847
Dengue / QC	_YYGGGYGSTQATFMVFQALAQYQK_	P01024	0.647188	0.647188	3.28021e-05	4.36368e-05	128	P01024	C3	Complement C3	CO3_HUMAN	1	56.6112	1.56611	Dengue	QC	NaN	NaN	NaN	80.6773	0.150925
Dengue / QC	_LVWEEAMSR_	Q16610	0.362028	0.362028	3.30005e-05	4.38615e-05	106	Q16610	ECM1	Extracellular matrix protein 1	ECM1_HUMAN	1	28.5231	1.28523	Dengue	QC	NaN	NaN	NaN	53.5584	0.0985296
Dengue / QC	_VYAC[Carbamidomethyl (C)]EVTHQGLSSPVTKSFNRGEC[Carbamidomethyl (C)]_	P01834	0.744199	0.744199	3.31294e-05	4.39931e-05	102	P01834	IGKC	Immunoglobulin kappa constant	IGKC_HUMAN	1	67.5044	1.67504	Dengue	QC	NaN	NaN	NaN	84.0412	0.137961
Dengue / QC	_VQPYLDDFQK_	P02647	-0.448828	0.448828	3.31731e-05	4.40412e-05	168	P02647	APOA1	Apolipoprotein A-I	APOA1_HUMAN	1	-26.7362	0.732638	Dengue	QC	NaN	NaN	NaN	50.2097	0.117539
Dengue / QC	_FTNIGPDTMR_	P02751;P02751-15;P02751-3;P02751-7	0.186938	0.186938	3.32427e-05	4.41236e-05	158	P02751;P02751-15;P02751-3;P02751-7	FN1	Fibronectin;Isoform 15 of Fibronectin;Isoform 3 of Fibronectin;Isoform 7 of Fibronectin	FINC_HUMAN	1	13.8345	1.13834	Dengue	QC	NaN	NaN	NaN	136.063	0.0717908
Dengue / QC	_SITC[Carbamidomethyl (C)]IHGVWTQLPQC[Carbamidomethyl (C)]VAIDKLKK_	P08603	0.777144	0.777144	3.33316e-05	4.42118e-05	170	P08603	CFH	Complement factor H	CFAH_HUMAN	1	71.3735	1.71373	Dengue	QC	NaN	NaN	NaN	127.336	0.16435
Dengue / QC	_EGGKDAC[Carbamidomethyl (C)]KGDSGGPLVC[Carbamidomethyl (C)]K_	H0YAC1;P03952	0.603055	0.603055	3.43697e-05	4.54885e-05	52	H0YAC1;P03952	KLKB1	Plasma kallikrein (Fragment);Plasma kallikrein	H0YAC1_HUMAN;KLKB1_HUMAN	1	51.893	1.51893	Dengue	QC	NaN	NaN	NaN	21.2443	0.151055
Dengue / QC	_IGDQWDKQHDMGHMMR_	P02751;P02751-15;P02751-3;P02751-7	0.559234	0.559234	3.43879e-05	4.54999e-05	174	P02751;P02751-15;P02751-3;P02751-7	FN1	Fibronectin;Isoform 15 of Fibronectin;Isoform 3 of Fibronectin;Isoform 7 of Fibronectin	FINC_HUMAN	1	47.3486	1.47349	Dengue	QC	NaN	NaN	NaN	156.108	0.111982
Dengue / QC	_TAFISDFAVTADGNAFIGDIKDKVTAWK_	P19827	0.642576	0.642576	3.45238e-05	4.56593e-05	98	P19827	ITIH1	Inter-alpha-trypsin inhibitor heavy chain H1	ITIH1_HUMAN	1	56.1114	1.56111	Dengue	QC	NaN	NaN	NaN	32.3471	0.108595
Dengue / QC	_TLQELKK_	P04114	0.999385	0.999385	3.48809e-05	4.61005e-05	30	P04114	APOB	Apolipoprotein B-100	APOB_HUMAN	1	99.9148	1.99915	Dengue	QC	NaN	NaN	NaN	10.6686	0.147889
Dengue / QC	_AFVNC[Carbamidomethyl (C)]DENSR_	P01833	0.977252	0.977252	3.59547e-05	4.73282e-05	102	P01833	PIGR	Polymeric immunoglobulin receptor	PIGR_HUMAN	1	96.8712	1.96871	Dengue	QC	NaN	NaN	NaN	80.9531	0.249229
Dengue / QC	_ASPAFLASQNTK_	P20742	2.18796	2.18796	3.60067e-05	4.73649e-05	126	P20742	PZP	Pregnancy zone protein	PZP_HUMAN	1	355.662	4.55662	Dengue	QC	NaN	NaN	NaN	86.1767	0.529548
Dengue / QC	_AAPGQEPPEHMAELQR_	O00391	0.572633	0.572633	3.60304e-05	4.73855e-05	74	O00391	QSOX1	Sulfhydryl oxidase 1	QSOX1_HUMAN	1	48.7235	1.48723	Dengue	QC	NaN	NaN	NaN	55.9268	0.162298
Dengue / QC	_QIQVSWLR_	P01871	-0.356768	0.356768	3.61646e-05	4.75195e-05	176	P01871	IGHM	Immunoglobulin heavy constant mu	IGHM_HUMAN	1	-21.9088	0.780912	Dengue	QC	NaN	NaN	NaN	123.51	0.081082
Dengue / QC	_QEMSKDLEEVK_	P02647	0.38678	0.38678	3.62353e-05	4.75753e-05	140	P02647	APOA1	Apolipoprotein A-I	APOA1_HUMAN	1	30.7472	1.30747	Dengue	QC	NaN	NaN	NaN	84.2453	0.0682536
Dengue / QC	_LC[Carbamidomethyl (C)]M[Oxidation (M)]GSGLNLC[Carbamidomethyl (C)]EPNNK_	P02787	-0.301184	0.301184	3.62394e-05	4.75753e-05	164	P02787	TF	Serotransferrin	TRFE_HUMAN	1	-18.8414	0.811586	Dengue	QC	NaN	NaN	NaN	76.3586	0.0774287
Dengue / QC	_FLEPFDIDDHQQVHC[Carbamidomethyl (C)]PYDQLQIYANGK_	B4DPQ0	0.342225	0.342225	3.65512e-05	4.79419e-05	150	B4DPQ0	C1R	Complement C1r subcomponent	B4DPQ0_HUMAN	1	26.771	1.26771	Dengue	QC	NaN	NaN	NaN	95.5195	0.0718653
Dengue / QC	_GQLKYPR_	P05160	0.484676	0.484676	3.67492e-05	4.81801e-05	98	P05160	F13B	Coagulation factor XIII B chain	F13B_HUMAN	1	39.9272	1.39927	Dengue	QC	NaN	NaN	NaN	30.4403	0.12151
Dengue / QC	_SLGPALLLLQK_	P14780	1.15186	1.15186	3.73068e-05	4.88241e-05	88	P14780	MMP9	Matrix metalloproteinase-9	MMP9_HUMAN	1	122.201	2.22201	Dengue	QC	NaN	NaN	NaN	55.1073	0.254132
Dengue / QC	_PLVEEPQNLIK_	P02768	-0.326675	0.326675	3.7919e-05	4.95702e-05	162	P02768	ALB	Serum albumin	ALBU_HUMAN	1	-20.2628	0.797372	Dengue	QC	NaN	NaN	NaN	91.4407	0.0663448
Dengue / QC	_EINLAPDSSSVVVSGLMVATK_	P02751;P02751-15;P02751-3;P02751-7	0.465464	0.465464	3.80265e-05	4.96886e-05	136	P02751;P02751-15;P02751-3;P02751-7	FN1	Fibronectin;Isoform 15 of Fibronectin;Isoform 3 of Fibronectin;Isoform 7 of Fibronectin	FINC_HUMAN	1	38.0761	1.38076	Dengue	QC	NaN	NaN	NaN	110.715	0.145708
Dengue / QC	_RSVAVYGQYGGQPC[Carbamidomethyl (C)]VGNAFETQSC[Carbamidomethyl (C)]EPTR_	P10643	0.523499	0.523499	3.81702e-05	4.983e-05	88	P10643	C7	Complement component C7	CO7_HUMAN	1	43.7437	1.43744	Dengue	QC	NaN	NaN	NaN	80.6677	0.145924
Dengue / QC	_SVSSDLQPYLQTLPVTTEIDSFADIDYSLVEAPR_	P18428	1.27026	1.27026	3.81899e-05	4.98358e-05	66	P18428	LBP	Lipopolysaccharide-binding protein	LBP_HUMAN	1	141.204	2.41204	Dengue	QC	NaN	NaN	NaN	18.1422	0.229674
Dengue / QC	_FEGIAC[Carbamidomethyl (C)]EISK_	P02748	-0.311249	0.311249	3.83025e-05	4.99717e-05	170	P02748	C9	Complement component C9	CO9_HUMAN	1	-19.4056	0.805944	Dengue	QC	NaN	NaN	NaN	73.626	0.0674582
Dengue / QC	_KLSSWVLLMK_	P01009	-0.312391	0.312391	3.83293e-05	4.99955e-05	162	P01009	SERPINA1	Alpha-1-antitrypsin	A1AT_HUMAN	1	-19.4694	0.805306	Dengue	QC	NaN	NaN	NaN	139.051	0.0777596
Dengue / QC	_TYTC[Carbamidomethyl (C)]NVDHKPSNTK_	P01861	0.471815	0.471815	3.84329e-05	5.01084e-05	174	P01861	IGHG4	Immunoglobulin heavy constant gamma 4	IGHG4_HUMAN	1	38.6853	1.38685	Dengue	QC	NaN	NaN	NaN	143.668	0.11952
Dengue / QC	_MQKEITALAPSTMK_	P60709	1.52815	1.52815	3.84759e-05	5.01423e-05	70	P60709	ACTB	Actin, cytoplasmic 1	ACTB_HUMAN	1	188.415	2.88415	Dengue	QC	NaN	NaN	NaN	40.798	0.300445
Dengue / QC	_GEWVALNPLR_	P08603	0.345574	0.345574	3.84737e-05	5.01423e-05	92	P08603	CFH	Complement factor H	CFAH_HUMAN	1	27.0656	1.27066	Dengue	QC	NaN	NaN	NaN	43.7414	0.0781646
Dengue / QC	_FFSAQTNR_	P29622	0.489202	0.489202	3.8564e-05	5.0246e-05	104	P29622	SERPINA4	Kallistatin	KAIN_HUMAN	1	40.3668	1.40367	Dengue	QC	NaN	NaN	NaN	46.1358	0.105191
Dengue / QC	_DMIC[Carbamidomethyl (C)]AGEKEGGKDAC[Carbamidomethyl (C)]AGDSGGPMVTLNR_	P48740	0.853085	0.853085	3.86641e-05	5.0343e-05	28	P48740	MASP1	Mannan-binding lectin serine protease 1	MASP1_HUMAN	1	80.6359	1.80636	Dengue	QC	NaN	NaN	NaN	17.4261	0.309439
Dengue / QC	_TVAAPSVFIFPPSDEQLKSGTASVVC[Carbamidomethyl (C)]LLNNFYPREAK_	P01834	1.30413	1.30413	3.90408e-05	5.07996e-05	102	P01834	IGKC	Immunoglobulin kappa constant	IGKC_HUMAN	1	146.934	2.46934	Dengue	QC	NaN	NaN	NaN	87.9503	0.258116
Dengue / QC	_SVLRPSQFGGQPC[Carbamidomethyl (C)]TAPLVAFQPC[Carbamidomethyl (C)]IPSK_	P13671	1.00622	1.00622	3.91143e-05	5.0884e-05	160	P13671	C6	Complement component C6	CO6_HUMAN	1	100.864	2.00864	Dengue	QC	NaN	NaN	NaN	86.8296	0.109226
Dengue / QC	_LRLEPLK_	P04114	0.775266	0.775266	4.00513e-05	5.2011e-05	36	P04114	APOB	Apolipoprotein B-100	APOB_HUMAN	1	71.1506	1.71151	Dengue	QC	NaN	NaN	NaN	13.1344	0.142849
Dengue / QC	_ILDELLQTC[Carbamidomethyl (C)]VDPEDC[Carbamidomethyl (C)]PVC[Carbamidomethyl (C)]EVAGR_	P04275	1.26897	1.26897	4.00709e-05	5.2025e-05	40	P04275	VWF	von Willebrand factor	VWF_HUMAN	1	140.99	2.4099	Dengue	QC	NaN	NaN	NaN	26.3406	0.26691
Dengue / QC	_ASGYTFTSYAMHWVR_	A0A0C4DH29	1.9681	1.9681	4.01398e-05	5.20914e-05	46	A0A0C4DH29	IGHV1-3	Immunoglobulin heavy variable 1-3	HV103_HUMAN	1	291.251	3.91251	Dengue	QC	NaN	NaN	NaN	25.2693	0.465821
Dengue / QC	_EDSC[Carbamidomethyl (C)]QLGYSAGPC[Carbamidomethyl (C)]M[Oxidation (M)]GMTSR_	P02760	1.15169	1.15169	4.02781e-05	5.22364e-05	20	P02760	AMBP	Protein AMBP	AMBP_HUMAN	1	122.174	2.22174	Dengue	QC	NaN	NaN	NaN	8.87737	0.210363
Dengue / QC	_FC[Carbamidomethyl (C)]PDGSPSEC[Carbamidomethyl (C)]HEHADC[Carbamidomethyl (C)]VLER_	G3XAP6;P49747	1.75844	1.75844	4.03512e-05	5.23196e-05	24	G3XAP6;P49747	COMP	Cartilage oligomeric matrix protein	G3XAP6_HUMAN;COMP_HUMAN	1	238.332	3.38332	Dengue	QC	NaN	NaN	NaN	18.1722	0.304902
Dengue / QC	_VLLDGVQNPRAEDLVGK_	P01024	0.803315	0.803315	4.03702e-05	5.23327e-05	112	P01024	C3	Complement C3	CO3_HUMAN	1	74.5106	1.74511	Dengue	QC	NaN	NaN	NaN	94.4454	0.172757
Dengue / QC	_AAMVGMLANFLGFR_	P01019	0.843152	0.843152	4.04925e-05	5.24569e-05	70	P01019	AGT	Angiotensinogen	ANGT_HUMAN	1	79.3965	1.79397	Dengue	QC	NaN	NaN	NaN	55.0849	0.167533
Dengue / QC	_FTISTDNSK_	A0A075B7B8	0.899929	0.899929	4.13835e-05	5.35873e-05	16	A0A075B7B8	IGHV3OR16-12	Immunoglobulin heavy variable 3/OR16-12 (non-functional) (Fragment)	A0A075B7B8_HUMAN	1	86.5975	1.86597	Dengue	QC	NaN	NaN	NaN	10.3437	0.148045
Dengue / QC	_AYIFIDEAHITQALIWLSQRQKDNGC[Carbamidomethyl (C)]FR_	P01023	0.823968	0.823968	4.15693e-05	5.38042e-05	140	P01023	A2M	Alpha-2-macroglobulin	A2MG_HUMAN	1	77.0268	1.77027	Dengue	QC	NaN	NaN	NaN	72.4282	0.150024
Dengue / QC	_GAYPLSIEPIGVR_	P00450	-0.533377	0.533377	4.20683e-05	5.44142e-05	176	P00450	CP	Ceruloplasmin	CERU_HUMAN	1	-30.9064	0.690936	Dengue	QC	NaN	NaN	NaN	47.2709	0.108182
Dengue / QC	_TC[Carbamidomethyl (C)]ESLGAGGYR_	P98160	0.526417	0.526417	4.25293e-05	5.49862e-05	28	P98160	HSPG2	Basement membrane-specific heparan sulfate proteoglycan core protein	PGBM_HUMAN	1	44.0348	1.44035	Dengue	QC	NaN	NaN	NaN	16.094	0.199031
Dengue / QC	_QRQEELC[Carbamidomethyl (C)]LAR_	P02753;Q5VY30	0.620485	0.620485	4.26985e-05	5.51808e-05	162	P02753;Q5VY30	RBP4	Retinol-binding protein 4;Retinol binding protein 4, plasma, isoform CRA_b	RET4_HUMAN;Q5VY30_HUMAN	1	53.7392	1.53739	Dengue	QC	NaN	NaN	NaN	143.536	0.124049
Dengue / QC	_ITENDIQIALDDAK_	P04114	0.167749	0.167749	4.29747e-05	5.55133e-05	142	P04114	APOB	Apolipoprotein B-100	APOB_HUMAN	1	12.3305	1.1233	Dengue	QC	NaN	NaN	NaN	59.8676	0.0802671
Dengue / QC	_NIQSLEVIGK_	P02775	-0.323549	0.323549	4.36144e-05	5.62409e-05	172	P02775	PPBP	Platelet basic protein	CXCL7_HUMAN	1	-20.0898	0.799102	Dengue	QC	NaN	NaN	NaN	65.0839	0.0719351
Dengue / QC	_EHLVQATPENLQEAR_	Q06033;Q06033-2	-0.496965	0.496965	4.42384e-05	5.69457e-05	164	Q06033;Q06033-2	ITIH3	Inter-alpha-trypsin inhibitor heavy chain H3;Isoform 2 of Inter-alpha-trypsin inhibitor heavy chain H3	ITIH3_HUMAN	1	-29.1404	0.708596	Dengue	QC	NaN	NaN	NaN	48.595	0.125707
Dengue / QC	_NSLYLQMNSLK_	A0A0B4J1Y9	-0.34464	0.34464	4.5326e-05	5.82692e-05	156	A0A0B4J1Y9	IGHV3-72	Immunoglobulin heavy variable 3-72	HV372_HUMAN	1	-21.2495	0.787505	Dengue	QC	NaN	NaN	NaN	94.8525	0.0754004
Dengue / QC	_LGQYASPTAKR_	P0C0L5	1.07618	1.07618	4.55987e-05	5.85814e-05	176	P0C0L5	C4B	Complement C4-B	CO4B_HUMAN	1	110.845	2.10845	Dengue	QC	NaN	NaN	NaN	154.552	0.183993
Dengue / QC	_VANYVDWINDR_	Q04756	0.549015	0.549015	4.57178e-05	5.87088e-05	50	Q04756	HGFAC	Hepatocyte growth factor activator	HGFA_HUMAN	1	46.3087	1.46309	Dengue	QC	NaN	NaN	NaN	39.9288	0.140837
Dengue / QC	_TATSEYQTFFNPR_	P00734	0.91359	0.91359	4.57296e-05	5.87111e-05	174	P00734	F2	Prothrombin	THRB_HUMAN	1	88.3728	1.88373	Dengue	QC	NaN	NaN	NaN	154.35	0.22077
Dengue / QC	_C[Carbamidomethyl (C)]NEYYLLR_	P05160	0.580561	0.580561	4.62344e-05	5.93204e-05	140	P05160	F13B	Coagulation factor XIII B chain	F13B_HUMAN	1	49.5431	1.49543	Dengue	QC	NaN	NaN	NaN	40.8797	0.107502
Dengue / QC	_MYYSAVEPTKDIFTGLIGPM[Oxidation (M)]K_	E9PFZ2	0.886403	0.886403	4.68208e-05	6.00335e-05	52	E9PFZ2	CP	Ceruloplasmin	E9PFZ2_HUMAN	1	84.8561	1.84856	Dengue	QC	NaN	NaN	NaN	6.46588	0.247897
Dengue / QC	_LTVGAAQVPAQLLVGALRVLAYSR_	P08571	1.0255	1.0255	4.68767e-05	6.00528e-05	60	P08571	CD14	Monocyte differentiation antigen CD14	CD14_HUMAN	1	103.567	2.03567	Dengue	QC	NaN	NaN	NaN	26.2467	0.130918
Dengue / QC	_KPVAFSDYIHPVC[Carbamidomethyl (C)]LPDRETAASLLQAGYK_	P00734	0.316743	0.316743	4.70449e-05	6.0242e-05	120	P00734	F2	Prothrombin	THRB_HUMAN	1	24.5516	1.24552	Dengue	QC	NaN	NaN	NaN	72.6226	0.0916093
Dengue / QC	_SMEDKGMTNINDGLLR_	Q06033;Q06033-2	-0.427341	0.427341	4.71463e-05	6.03588e-05	174	Q06033;Q06033-2	ITIH3	Inter-alpha-trypsin inhibitor heavy chain H3;Isoform 2 of Inter-alpha-trypsin inhibitor heavy chain H3	ITIH3_HUMAN	1	-25.6369	0.743631	Dengue	QC	NaN	NaN	NaN	38.9003	0.126888
Dengue / QC	_LPYTIITTPPLKDFSLWEK_	P04114	0.704716	0.704716	4.7352e-05	6.05825e-05	116	P04114	APOB	Apolipoprotein B-100	APOB_HUMAN	1	62.9824	1.62982	Dengue	QC	NaN	NaN	NaN	94.1477	0.104118
Dengue / QC	_GRYGTLFTMDR_	Q15582	0.800667	0.800667	4.75633e-05	6.08094e-05	24	Q15582	TGFBI	Transforming growth factor-beta-induced protein ig-h3	BGH3_HUMAN	1	74.1906	1.74191	Dengue	QC	NaN	NaN	NaN	17.3957	0.263883
Dengue / QC	_LGM[Oxidation (M)]FNIQHC[Carbamidomethyl (C)]KK_	P01009	4.26288	4.26288	4.77638e-05	6.1043e-05	32	P01009	SERPINA1	Alpha-1-antitrypsin	A1AT_HUMAN	1	1819.8	19.198	Dengue	QC	NaN	NaN	NaN	9.48553	0.396508
Dengue / QC	_FLLKAEPLAFTFSHDYKGSTSHHLVSR_	P04114	1.27322	1.27322	4.79208e-05	6.12039e-05	32	P04114	APOB	Apolipoprotein B-100	APOB_HUMAN	1	141.7	2.417	Dengue	QC	NaN	NaN	NaN	21.212	0.23467
Dengue / QC	_EPQVYTLPPSREEM[Oxidation (M)]TK_	P01860	-0.522528	0.522528	4.8218e-05	6.153e-05	176	P01860	IGHG3	Immunoglobulin heavy constant gamma 3	IGHG3_HUMAN	1	-30.3849	0.696151	Dengue	QC	NaN	NaN	NaN	77.4614	0.120008
Dengue / QC	_LVGGDNLC[Carbamidomethyl (C)]SGR_	O43866	-0.446552	0.446552	4.82605e-05	6.15709e-05	174	O43866	CD5L	CD5 antigen-like	CD5L_HUMAN	1	-26.6205	0.733795	Dengue	QC	NaN	NaN	NaN	65.1604	0.115503
Dengue / QC	_DSTLIMQLLR_	P62258	1.07504	1.07504	4.83701e-05	6.16705e-05	16	P62258	YWHAE	14-3-3 protein epsilon	1433E_HUMAN	1	110.678	2.10678	Dengue	QC	NaN	NaN	NaN	4.37925	0.222524
Dengue / QC	_MALEVYK_	P04003	-0.320294	0.320294	4.86555e-05	6.19941e-05	176	P04003	C4BPA	C4b-binding protein alpha chain	C4BPA_HUMAN	1	-19.9093	0.800907	Dengue	QC	NaN	NaN	NaN	42.3864	0.079976
Dengue / QC	_HQPQEFPTYVEPTNDEIC[Carbamidomethyl (C)]EAFRKDPK_	P02774;P02774-3	0.398328	0.398328	4.90544e-05	6.24753e-05	176	P02774;P02774-3	GC	Vitamin D-binding protein;Isoform 3 of Vitamin D-binding protein	VTDB_HUMAN	1	31.7979	1.31798	Dengue	QC	NaN	NaN	NaN	154.086	0.105407
Dengue / QC	_HC[Carbamidomethyl (C)]ETC[Carbamidomethyl (C)]ISGFYGDPTNGGK_	O75882;O75882-2	0.457321	0.457321	4.93991e-05	6.28191e-05	70	O75882;O75882-2	ATRN	Attractin;Isoform 2 of Attractin	ATRN_HUMAN	1	37.299	1.37299	Dengue	QC	NaN	NaN	NaN	34.1209	0.0958034
Dengue / QC	_LSFVKVDSHFR_	P01023	-0.679531	0.679531	4.94476e-05	6.28673e-05	172	P01023	A2M	Alpha-2-macroglobulin	A2MG_HUMAN	1	-37.5632	0.624368	Dengue	QC	NaN	NaN	NaN	45.7336	0.158808
Dengue / QC	_FGSGYVSGWGR_	P00740	0.356427	0.356427	5.01204e-05	6.36539e-05	72	P00740	F9	Coagulation factor IX	FA9_HUMAN	1	28.0252	1.28025	Dengue	QC	NaN	NaN	NaN	60.1464	0.0782628
Dengue / QC	_DYIEFNKEIPAWVPFDPAAQITK_	P25311	3.92322	3.92322	5.03779e-05	6.39165e-05	26	P25311	AZGP1	Zinc-alpha-2-glycoprotein	ZA2G_HUMAN	1	1417.07	15.1707	Dengue	QC	NaN	NaN	NaN	16.5679	0.518867
Dengue / QC	_YVGGQEHFAHLLILRDTK_	P02763	0.994991	0.994991	5.04074e-05	6.39356e-05	164	P02763	ORM1	Alpha-1-acid glycoprotein 1	A1AG1_HUMAN	1	99.3068	1.99307	Dengue	QC	NaN	NaN	NaN	153.886	0.21732
Dengue / QC	_LKC[Carbamidomethyl (C)]LAYDFYPGK_	P25311	1.13496	1.13496	5.07053e-05	6.42719e-05	46	P25311	AZGP1	Zinc-alpha-2-glycoprotein	ZA2G_HUMAN	1	119.613	2.19613	Dengue	QC	NaN	NaN	NaN	38.4229	0.235565
Dengue / QC	_C[Carbamidomethyl (C)]MADKTLPEC[Carbamidomethyl (C)]SKLPNNVLQEK_	P43652	0.0751175	0.0751175	5.1503e-05	6.51567e-05	82	P43652	AFM	Afamin	AFAM_HUMAN	1	5.34468	1.05345	Dengue	QC	NaN	NaN	NaN	43.0159	0.290615
Dengue / QC	_GLEEELQFSLGSK_	P0C0L5	0.490479	0.490479	5.26093e-05	6.64563e-05	154	P0C0L5	C4B	Complement C4-B	CO4B_HUMAN	1	40.4911	1.40491	Dengue	QC	NaN	NaN	NaN	120.439	0.0963779
Dengue / QC	_ADYEKHKVYAC[Carbamidomethyl (C)]EVTHQGLSSPVTK_	P01834	2.50553	2.50553	5.40217e-05	6.80796e-05	148	P01834	IGKC	Immunoglobulin kappa constant	IGKC_HUMAN	1	467.857	5.67857	Dengue	QC	NaN	NaN	NaN	96.514	0.466316
Dengue / QC	_VDAFC[Carbamidomethyl (C)]GGSIVNEK_	P00740	0.300328	0.300328	5.43622e-05	6.84794e-05	102	P00740	F9	Coagulation factor IX	FA9_HUMAN	1	23.1424	1.23142	Dengue	QC	NaN	NaN	NaN	79.7615	0.0840907
Dengue / QC	_INPNSGGTNYAQK_	A0A075B7D0	1.65646	1.65646	5.46463e-05	6.88078e-05	50	A0A075B7D0	IGHV1OR15-1	Immunoglobulin heavy variable 1/OR15-1 (non-functional) (Fragment)	A0A075B7D0_HUMAN	1	215.242	3.15242	Dengue	QC	NaN	NaN	NaN	25.2385	0.35934
Dengue / QC	_STDYGIFQINSR_	P61626	-0.434173	0.434173	5.50619e-05	6.93163e-05	168	P61626	LYZ	Lysozyme C	LYSC_HUMAN	1	-25.9882	0.740118	Dengue	QC	NaN	NaN	NaN	96.4674	0.098382
Dengue / QC	_IWHHTFYNELR_	P60709	0.873959	0.873959	5.57561e-05	7.01451e-05	28	P60709	ACTB	Actin, cytoplasmic 1	ACTB_HUMAN	1	83.2685	1.83268	Dengue	QC	NaN	NaN	NaN	22.4534	0.149667
Dengue / QC	_LFDEINPETK_	G3V2W1;Q9UK55	0.280194	0.280194	5.61313e-05	7.05719e-05	74	G3V2W1;Q9UK55	SERPINA10	Protein Z-dependent protease inhibitor	G3V2W1_HUMAN;ZPI_HUMAN	1	21.4358	1.21436	Dengue	QC	NaN	NaN	NaN	46.1039	0.104738
Dengue / QC	_GNSYFMVEVK_	Q96KN2	0.938202	0.938202	5.64826e-05	7.09681e-05	32	Q96KN2	CNDP1	Beta-Ala-His dipeptidase	CNDP1_HUMAN	1	91.6138	1.91614	Dengue	QC	NaN	NaN	NaN	15.5629	0.201136
Dengue / QC	_ADDKETC[Carbamidomethyl (C)]FAEEGK_	P02768	-0.422482	0.422482	5.65912e-05	7.10894e-05	158	P02768	ALB	Serum albumin	ALBU_HUMAN	1	-25.386	0.74614	Dengue	QC	NaN	NaN	NaN	55.6063	0.0871128
Dengue / QC	_LLIYKASSLESGVPSR_	P01602	0.701757	0.701757	5.66536e-05	7.11526e-05	62	P01602	IGKV1-5	Immunoglobulin kappa variable 1-5	KV105_HUMAN	1	62.6484	1.62648	Dengue	QC	NaN	NaN	NaN	40.7381	0.367439
Dengue / QC	_VNEPSILEMSR_	O14791;O14791-2	-0.247593	0.247593	5.67775e-05	7.12778e-05	174	O14791;O14791-2	APOL1	Apolipoprotein L1;Isoform 2 of Apolipoprotein L1	APOL1_HUMAN	1	-15.7699	0.842301	Dengue	QC	NaN	NaN	NaN	87.1229	0.0599391
Dengue / QC	_DNPMYYC[Carbamidomethyl (C)]NKK_	O75882;O75882-2	0.348431	0.348431	5.70609e-05	7.15419e-05	128	O75882;O75882-2	ATRN	Attractin;Isoform 2 of Attractin	ATRN_HUMAN	1	27.3175	1.27318	Dengue	QC	NaN	NaN	NaN	70.3142	0.0836144
Dengue / QC	_KC[Carbamidomethyl (C)]DPTEVELDNQIVTATQSNIC[Carbamidomethyl (C)]DEDSATETC[Carbamidomethyl (C)]YTYDR_	P01591	1.05239	1.05239	5.70533e-05	7.15419e-05	40	P01591	JCHAIN	Immunoglobulin J chain	IGJ_HUMAN	1	107.397	2.07397	Dengue	QC	NaN	NaN	NaN	29.0469	0.191892
Dengue / QC	_STSIVIM[Oxidation (M)]LTDGDANVGESRPEK_	Q06033;Q06033-2	-0.44924	0.44924	5.78455e-05	7.24176e-05	44	Q06033;Q06033-2	ITIH3	Inter-alpha-trypsin inhibitor heavy chain H3;Isoform 2 of Inter-alpha-trypsin inhibitor heavy chain H3	ITIH3_HUMAN	1	-26.7572	0.732428	Dengue	QC	NaN	NaN	NaN	24.3144	0.247758
Dengue / QC	_NTLYLQMSSLR_	A0A0J9YX35	-0.430698	0.430698	5.82916e-05	7.29296e-05	170	A0A0J9YX35	IGHV3-64D	Immunoglobulin heavy variable 3-64D	HV64D_HUMAN	1	-25.8097	0.741903	Dengue	QC	NaN	NaN	NaN	77.7225	0.0995441
Dengue / QC	_ENADSLQASLRPHADELKAK_	P06727	0.746979	0.746979	5.85481e-05	7.32102e-05	70	P06727	APOA4	Apolipoprotein A-IV	APOA4_HUMAN	1	67.8275	1.67828	Dengue	QC	NaN	NaN	NaN	60.7617	0.138408
Dengue / QC	_FSGSGSGTDFTLK_	A0A087X0Q4	-0.339118	0.339118	5.89962e-05	7.37014e-05	176	A0A087X0Q4	IGKV2-40	Immunoglobulin kappa variable 2-40	A0A087X0Q4_HUMAN	1	-20.9475	0.790525	Dengue	QC	NaN	NaN	NaN	73.4209	0.0735194
Dengue / QC	_APVGHFYEPQAPSAEVEM[Oxidation (M)]TSYVLLAYLTAQPAPTSEDLTSATNIVK_	P01023	0.372546	0.372546	5.95889e-05	7.44103e-05	120	P01023	A2M	Alpha-2-macroglobulin	A2MG_HUMAN	1	29.4636	1.29464	Dengue	QC	NaN	NaN	NaN	54.6207	0.195454
Dengue / QC	_TGLQEVEVK_	P01024	-0.642076	0.642076	6.18549e-05	7.69416e-05	174	P01024	C3	Complement C3	CO3_HUMAN	1	-35.921	0.64079	Dengue	QC	NaN	NaN	NaN	37.7697	0.153684
Dengue / QC	_IGDTWSKK_	P02751;P02751-15;P02751-3;P02751-7	1.4976	1.4976	6.18856e-05	7.69516e-05	18	P02751;P02751-15;P02751-3;P02751-7	FN1	Fibronectin;Isoform 15 of Fibronectin;Isoform 3 of Fibronectin;Isoform 7 of Fibronectin	FINC_HUMAN	1	182.373	2.82373	Dengue	QC	NaN	NaN	NaN	12.2283	0.275325
Dengue / QC	_VTMSVDTSK_	A0A0C4DH34	-0.371537	0.371537	6.23546e-05	7.74693e-05	174	A0A0C4DH34	IGHV4-28	Immunoglobulin heavy variable 4-28	HV428_HUMAN	1	-22.7041	0.772959	Dengue	QC	NaN	NaN	NaN	67.361	0.0991104
Dengue / QC	_VEGTAFVIFGIQDGEQR_	P01024	0.462823	0.462823	6.52932e-05	8.07451e-05	108	P01024	C3	Complement C3	CO3_HUMAN	1	37.8236	1.37824	Dengue	QC	NaN	NaN	NaN	63.8221	0.114157
Dengue / QC	_AKAYLEEEC[Carbamidomethyl (C)]PATLRK_	P25311	0.630693	0.630693	6.5497e-05	8.09461e-05	134	P25311	AZGP1	Zinc-alpha-2-glycoprotein	ZA2G_HUMAN	1	54.8309	1.54831	Dengue	QC	NaN	NaN	NaN	92.6673	0.143932
Dengue / QC	_NPDSGKQPWC[Carbamidomethyl (C)]YTTDPC[Carbamidomethyl (C)]VR_	P08519	2.30831	2.30831	6.55145e-05	8.09507e-05	62	P08519	LPA	Apolipoprotein(a)	APOA_HUMAN	1	395.303	4.95303	Dengue	QC	NaN	NaN	NaN	31.548	0.363916
Dengue / QC	_LWAYLTIEQLLEK_	Q06033;Q06033-2	0.849088	0.849088	6.6026e-05	8.15484e-05	56	Q06033;Q06033-2	ITIH3	Inter-alpha-trypsin inhibitor heavy chain H3;Isoform 2 of Inter-alpha-trypsin inhibitor heavy chain H3	ITIH3_HUMAN	1	80.1362	1.80136	Dengue	QC	NaN	NaN	NaN	33.5156	0.26252
Dengue / QC	_ARANLQSVPHASASRPR_	O14791;O14791-2	0.842329	0.842329	6.72815e-05	8.29549e-05	48	O14791;O14791-2	APOL1	Apolipoprotein L1;Isoform 2 of Apolipoprotein L1	APOL1_HUMAN	1	79.2942	1.79294	Dengue	QC	NaN	NaN	NaN	43.2584	0.162927
Dengue / QC	_VNVDAVGGEALGR_	P02042	0.285701	0.285701	6.72916e-05	8.29549e-05	154	P02042	HBD	Hemoglobin subunit delta	HBD_HUMAN	1	21.9002	1.219	Dengue	QC	NaN	NaN	NaN	142.586	0.0618067
Dengue / QC	_MVC[Carbamidomethyl (C)]AGYKEGGK_	H0YAC1;P03952	2.44692	2.44692	6.74374e-05	8.31172e-05	18	H0YAC1;P03952	KLKB1	Plasma kallikrein (Fragment);Plasma kallikrein	H0YAC1_HUMAN;KLKB1_HUMAN	1	445.25	5.4525	Dengue	QC	NaN	NaN	NaN	12.9312	0.407586
Dengue / QC	_C[Carbamidomethyl (C)]QAYESNR_	P43652	0.763874	0.763874	6.77718e-05	8.34944e-05	48	P43652	AFM	Afamin	AFAM_HUMAN	1	69.8044	1.69804	Dengue	QC	NaN	NaN	NaN	25.2661	0.128447
Dengue / QC	_GDTYPAELYITGSILR_	P05160	0.331782	0.331782	6.8056e-05	8.38172e-05	142	P05160	F13B	Coagulation factor XIII B chain	F13B_HUMAN	1	25.8567	1.25857	Dengue	QC	NaN	NaN	NaN	73.3086	0.0952356
Dengue / QC	_ENQKKPLIGTVLAMDPDAAR_	P33151	0.74798	0.74798	6.83371e-05	8.41028e-05	66	P33151	CDH5	Cadherin-5	CADH5_HUMAN	1	67.9439	1.67944	Dengue	QC	NaN	NaN	NaN	36.0916	0.156748
Dengue / QC	_DSFHLDEQFTVPVEM[Oxidation (M)]MQAR_	P08697	0.445959	0.445959	6.84797e-05	8.42607e-05	82	P08697	SERPINF2	Alpha-2-antiplasmin	A2AP_HUMAN	1	36.2219	1.36222	Dengue	QC	NaN	NaN	NaN	74.0204	0.100107
Dengue / QC	_IYISGMAPRPSLAKK_	P04004	0.552316	0.552316	6.85761e-05	8.43548e-05	174	P04004	VTN	Vitronectin	VTNC_HUMAN	1	46.6438	1.46644	Dengue	QC	NaN	NaN	NaN	115.243	0.101781
Dengue / QC	_VGSALFLSHNLK_	P29622	0.864379	0.864379	6.86101e-05	8.43682e-05	32	P29622	SERPINA4	Kallistatin	KAIN_HUMAN	1	82.0556	1.82056	Dengue	QC	NaN	NaN	NaN	6.39766	0.137709
Dengue / QC	_DVRDYFMPC[Carbamidomethyl (C)]PGRGHGHR_	P02790	0.896548	0.896548	6.86523e-05	8.44025e-05	154	P02790	HPX	Hemopexin	HEMO_HUMAN	1	86.1606	1.86161	Dengue	QC	NaN	NaN	NaN	137.215	0.174803
Dengue / QC	_YVYIAELLAHK_	P27169	0.194231	0.194231	7.09728e-05	8.70371e-05	112	P27169	PON1	Serum paraoxonase/arylesterase 1	PON1_HUMAN	1	14.4114	1.14411	Dengue	QC	NaN	NaN	NaN	77.8505	0.102153
Dengue / QC	_RQDGSVDFFR_	O75636	-0.532561	0.532561	7.26524e-05	8.893e-05	156	O75636	FCN3	Ficolin-3	FCN3_HUMAN	1	-30.8673	0.691327	Dengue	QC	NaN	NaN	NaN	39.5715	0.121714
Dengue / QC	_FIQVGVISWGVVDVC[Carbamidomethyl (C)]K_	B4E1Z4	1.31099	1.31099	7.38225e-05	9.02122e-05	20	B4E1Z4	NaN	cDNA FLJ55673, highly similar to Complement factor B (EC 3.4.21.47)	B4E1Z4_HUMAN	1	148.112	2.48112	Dengue	QC	NaN	NaN	NaN	11.0692	0.25822
Dengue / QC	_SVLGQLGITK_	P01009	-0.4026	0.4026	7.46558e-05	9.11547e-05	176	P01009	SERPINA1	Alpha-1-antitrypsin	A1AT_HUMAN	1	-24.3506	0.756494	Dengue	QC	NaN	NaN	NaN	107.472	0.0827999
Dengue / QC	_HC[Carbamidomethyl (C)]LVTVEK_	P07225	0.436728	0.436728	7.54822e-05	9.20543e-05	80	P07225	PROS1	Vitamin K-dependent protein S	PROS_HUMAN	1	35.3531	1.35353	Dengue	QC	NaN	NaN	NaN	73.6239	0.0934889
Dengue / QC	_FTISRDDSKNTAYLQMNSLK_	A0A0B4J1V6	0.406691	0.406691	7.54864e-05	9.20543e-05	32	A0A0B4J1V6	IGHV3-73	Immunoglobulin heavy variable 3-73	HV373_HUMAN	1	32.5642	1.32564	Dengue	QC	NaN	NaN	NaN	14.1475	0.771162
Dengue / QC	_VASYGVKPR_	B4E1Z4	-0.485744	0.485744	7.56842e-05	9.22764e-05	90	B4E1Z4	NaN	cDNA FLJ55673, highly similar to Complement factor B (EC 3.4.21.47)	B4E1Z4_HUMAN	1	-28.5871	0.714129	Dengue	QC	NaN	NaN	NaN	38.5171	0.14711
Dengue / QC	_SHC[Carbamidomethyl (C)]IAEVENDEMPADLPSLAADFVESKDVC[Carbamidomethyl (C)]KNYAEAK_	P02768	1.16272	1.16272	7.58434e-05	9.24322e-05	166	P02768	ALB	Serum albumin	ALBU_HUMAN	1	123.878	2.23878	Dengue	QC	NaN	NaN	NaN	140.256	0.264406
Dengue / QC	_VDDGVASFVLNLPSGVTVLEFNVK_	P01031	1.31313	1.31313	7.61414e-05	9.27377e-05	46	P01031	C5	Complement C5	CO5_HUMAN	1	148.479	2.48479	Dengue	QC	NaN	NaN	NaN	11.8951	0.237416
Dengue / QC	_IPGTC[Carbamidomethyl (C)]C[Carbamidomethyl (C)]DTC[Carbamidomethyl (C)]EEPEC[Carbamidomethyl (C)]NDITAR_	P04275	0.967726	0.967726	7.67627e-05	9.34364e-05	58	P04275	VWF	von Willebrand factor	VWF_HUMAN	1	95.5755	1.95576	Dengue	QC	NaN	NaN	NaN	39.3245	0.178911
Dengue / QC	_NPFVFAPTLLTVAVHFEEVAK_	P43652	0.634357	0.634357	7.6748e-05	9.34364e-05	66	P43652	AFM	Afamin	AFAM_HUMAN	1	55.2245	1.55225	Dengue	QC	NaN	NaN	NaN	13.8645	0.154393
Dengue / QC	_NFPDLNTYIYYNEK_	P15169	0.42724	0.42724	7.71762e-05	9.39009e-05	124	P15169	CPN1	Carboxypeptidase N catalytic chain	CBPN_HUMAN	1	34.4659	1.34466	Dengue	QC	NaN	NaN	NaN	33.8518	0.098134
Dengue / QC	_YIEKIQPSGGTNINEALLR_	P19823	0.44309	0.44309	7.74384e-05	9.42005e-05	114	P19823	ITIH2	Inter-alpha-trypsin inhibitor heavy chain H2	ITIH2_HUMAN	1	35.9513	1.35951	Dengue	QC	NaN	NaN	NaN	96.1127	0.0874133
Dengue / QC	_LAEGFPLPLLKR_	P18428	0.620482	0.620482	7.74863e-05	9.42392e-05	24	P18428	LBP	Lipopolysaccharide-binding protein	LBP_HUMAN	1	53.7389	1.53739	Dengue	QC	NaN	NaN	NaN	13.8663	0.271475
Dengue / QC	_VSVFVPPRDGFFGNPRK_	P01871	1.12639	1.12639	7.76932e-05	9.44518e-05	56	P01871	IGHM	Immunoglobulin heavy constant mu	IGHM_HUMAN	1	118.311	2.18311	Dengue	QC	NaN	NaN	NaN	19.4188	0.233988
Dengue / QC	_LSLEIEQLELQRDSAR_	P04003	1.18238	1.18238	7.90616e-05	9.59568e-05	50	P04003	C4BPA	C4b-binding protein alpha chain	C4BPA_HUMAN	1	126.951	2.26951	Dengue	QC	NaN	NaN	NaN	21.0037	0.20309
Dengue / QC	_HQDGSYSTFGER_	P20742	3.02264	3.02264	7.91342e-05	9.60053e-05	68	P20742	PZP	Pregnancy zone protein	PZP_HUMAN	1	712.655	8.12655	Dengue	QC	NaN	NaN	NaN	48.0155	0.716598
Dengue / QC	_VYFFKGK_	P04004	1.02909	1.02909	8.01146e-05	9.70946e-05	36	P04004	VTN	Vitronectin	VTNC_HUMAN	1	104.074	2.04074	Dengue	QC	NaN	NaN	NaN	14.6048	0.405773
Dengue / QC	_DLATVYVDVLK_	P02647	0.398956	0.398956	8.0242e-05	9.7229e-05	160	P02647	APOA1	Apolipoprotein A-I	APOA1_HUMAN	1	31.8553	1.31855	Dengue	QC	NaN	NaN	NaN	134.597	0.091903
Dengue / QC	_TLIEKTNEER_	P10909;P10909-2;P10909-4;P10909-5	0.561876	0.561876	8.05126e-05	9.75368e-05	142	P10909;P10909-2;P10909-4;P10909-5	CLU	Clusterin;Isoform 2 of Clusterin;Isoform 4 of Clusterin;Isoform 5 of Clusterin	CLUS_HUMAN	1	47.6188	1.47619	Dengue	QC	NaN	NaN	NaN	100.034	0.128027
Dengue / QC	_IIALDGDTK_	A0A0B4J1R6;P29401;P29401-2	1.86291	1.86291	8.12991e-05	9.83541e-05	14	A0A0B4J1R6;P29401;P29401-2	TKT	Transketolase;Transketolase;Isoform 2 of Transketolase	A0A0B4J1R6_HUMAN;TKT_HUMAN;TKT_HUMAN	1	263.741	3.63741	Dengue	QC	NaN	NaN	NaN	9.00278	0.279649
Dengue / QC	_FQSVFTVTR_	P02747	-0.282869	0.282869	8.1459e-05	9.85211e-05	176	P02747	C1QC	Complement C1q subcomponent subunit C	C1QC_HUMAN	1	-17.8045	0.821955	Dengue	QC	NaN	NaN	NaN	52.8026	0.0651162
Dengue / QC	_GQPREPQVYTLPPSREEMTK_	P01860	-0.412528	0.412528	8.17127e-05	9.87873e-05	176	P01860	IGHG3	Immunoglobulin heavy constant gamma 3	IGHG3_HUMAN	1	-24.8694	0.751306	Dengue	QC	NaN	NaN	NaN	69.7141	0.0994582
Dengue / QC	_ANVFVQLPR_	P35858;P35858-2	0.724846	0.724846	8.23882e-05	9.95425e-05	32	P35858;P35858-2	IGFALS	Insulin-like growth factor-binding protein complex acid labile subunit;Isoform 2 of Insulin-like growth factor-binding protein complex acid labile subunit	ALS_HUMAN	1	65.2724	1.65272	Dengue	QC	NaN	NaN	NaN	25.0889	0.117737
Dengue / QC	_LSSVTAADTAVYYC[Carbamidomethyl (C)]AR_	A0A075B6R2	-0.46254	0.46254	8.29656e-05	0.000100175	176	A0A075B6R2	IGHV4-4	Immunoglobulin heavy variable 4-4	HV404_HUMAN	1	-27.4293	0.725707	Dengue	QC	NaN	NaN	NaN	70.5225	0.108154
Dengue / QC	_RSDFASNC[Carbamidomethyl (C)]C[Carbamidomethyl (C)]SINSPPLYC[Carbamidomethyl (C)]DSEIDAELK_	P02774;P02774-3	0.553273	0.553273	8.33041e-05	0.000100505	88	P02774;P02774-3	GC	Vitamin D-binding protein;Isoform 3 of Vitamin D-binding protein	VTDB_HUMAN	1	46.7411	1.46741	Dengue	QC	NaN	NaN	NaN	26.0167	0.13601
Dengue / QC	_LYPTYSTK_	P80108	0.510257	0.510257	8.38058e-05	0.000101027	76	P80108	GPLD1	Phosphatidylinositol-glycan-specific phospholipase D	PHLD_HUMAN	1	42.4304	1.4243	Dengue	QC	NaN	NaN	NaN	38.3382	0.0922538
Dengue / QC	_ENLDRDIALMK_	P00734	-0.266645	0.266645	8.42529e-05	0.000101504	172	P00734	F2	Prothrombin	THRB_HUMAN	1	-16.875	0.83125	Dengue	QC	NaN	NaN	NaN	95.5092	0.0600336
Dengue / QC	_VVLSQGSK_	I3L145;P04278	1.1401	1.1401	8.47661e-05	0.000102018	26	I3L145;P04278	SHBG	Sex hormone-binding globulin	I3L145_HUMAN;SHBG_HUMAN	1	120.397	2.20397	Dengue	QC	NaN	NaN	NaN	19.8575	0.229774
Dengue / QC	_LLEPHC[Carbamidomethyl (C)]FPLSLVPTEFC[Carbamidomethyl (C)]PSPPALK_	P10643	0.425442	0.425442	8.49644e-05	0.000102214	122	P10643	C7	Complement component C7	CO7_HUMAN	1	34.2984	1.34298	Dengue	QC	NaN	NaN	NaN	74.3984	0.128895
Dengue / QC	_SQVVLTMTNMDPVDTATYYC[Carbamidomethyl (C)]AR_	A0A0B4J1V2	1.36214	1.36214	8.68643e-05	0.000104266	94	A0A0B4J1V2	IGHV2-26	Immunoglobulin heavy variable 2-26	HV226_HUMAN	1	157.066	2.57066	Dengue	QC	NaN	NaN	NaN	60.7457	0.218212
Dengue / QC	_HRGVYSSDVFDIFPGTYQTLEM[Oxidation (M)]FPR_	P00450	-0.390411	0.390411	8.693e-05	0.000104323	70	P00450	CP	Ceruloplasmin	CERU_HUMAN	1	-23.7088	0.762912	Dengue	QC	NaN	NaN	NaN	34.2025	0.259679
Dengue / QC	_SLSC[Carbamidomethyl (C)]RPPMVK_	P04275	2.70069	2.70069	8.72115e-05	0.000104618	26	P04275	VWF	von Willebrand factor	VWF_HUMAN	1	550.113	6.50113	Dengue	QC	NaN	NaN	NaN	18.0038	0.446178
Dengue / QC	_LLDLVFLLDGSSR_	P04275	0.618837	0.618837	8.74042e-05	0.000104807	38	P04275	VWF	von Willebrand factor	VWF_HUMAN	1	53.5636	1.53564	Dengue	QC	NaN	NaN	NaN	14.5811	0.169415
Dengue / QC	_SNLC[Carbamidomethyl (C)]ALC[Carbamidomethyl (C)]IGDEQGENK_	E7ER44;P02788	0.863113	0.863113	8.77633e-05	0.000105194	60	E7ER44;P02788	LTF	Lactotransferrin	E7ER44_HUMAN;TRFL_HUMAN	1	81.8959	1.81896	Dengue	QC	NaN	NaN	NaN	48.9562	0.211328
Dengue / QC	_TLDHDRC[Carbamidomethyl (C)]DQHTDC[Carbamidomethyl (C)]YSC[Carbamidomethyl (C)]TANTNDC[Carbamidomethyl (C)]HWC[Carbamidomethyl (C)]NDHC[Carbamidomethyl (C)]VPR_	O75882;O75882-2	0.695249	0.695249	8.77932e-05	0.000105209	40	O75882;O75882-2	ATRN	Attractin;Isoform 2 of Attractin	ATRN_HUMAN	1	61.9163	1.61916	Dengue	QC	NaN	NaN	NaN	12.8124	0.12777
Dengue / QC	_SLKYNPVVIDFEMQPIHEVLR_	P07357	0.564164	0.564164	8.8574e-05	0.000106101	142	P07357	C8A	Complement component C8 alpha chain	CO8A_HUMAN	1	47.853	1.47853	Dengue	QC	NaN	NaN	NaN	107.286	0.149922
Dengue / QC	_LLIYAASSLQSGVPSR_	A0A0C4DH72	-0.634026	0.634026	8.89636e-05	0.000106481	176	A0A0C4DH72	IGKV1-6	Immunoglobulin kappa variable 1-6	KV106_HUMAN	1	-35.5624	0.644376	Dengue	QC	NaN	NaN	NaN	95.4933	0.109096
Dengue / QC	_ESNEELTESC[Carbamidomethyl (C)]ETK_	P01042	1.51466	1.51466	8.89844e-05	0.000106485	150	P01042	KNG1	Kininogen-1	KNG1_HUMAN	1	185.732	2.85732	Dengue	QC	NaN	NaN	NaN	88.7497	0.168766
Dengue / QC	_YIETDPANRDR_	P06396	0.561922	0.561922	9.01475e-05	0.000107811	170	P06396	GSN	Gelsolin	GELS_HUMAN	1	47.6234	1.47623	Dengue	QC	NaN	NaN	NaN	119.376	0.126
Dengue / QC	_FSGVPDRFSGSGSGTDFTLK_	A0A075B6S2;A2NJV5	0.482821	0.482821	9.05323e-05	0.000108205	160	A0A075B6S2;A2NJV5	IGKV2D-29;IGKV2-29	Immunoglobulin kappa variable 2D-29;Immunoglobulin kappa variable 2-29	KVD29_HUMAN;KV229_HUMAN	1	39.7474	1.39747	Dengue	QC	NaN	NaN	NaN	124.254	0.115234
Dengue / QC	_DFALLSLQVPLKDAK_	P0C0L5	0.243078	0.243078	9.08342e-05	0.000108544	176	P0C0L5	C4B	Complement C4-B	CO4B_HUMAN	1	18.3515	1.18351	Dengue	QC	NaN	NaN	NaN	128.432	0.0822488
Dengue / QC	_YRGDQDATMSILDISM[Oxidation (M)]MTGFAPDTDDLKQLANGVDR_	P01024	1.58066	1.58066	9.13459e-05	0.000109133	38	P01024	C3	Complement C3	CO3_HUMAN	1	199.107	2.99107	Dengue	QC	NaN	NaN	NaN	7.96175	0.196925
Dengue / QC	_AQEGLRPGTLC[Carbamidomethyl (C)]TVAGWGR_	P08311	1.17663	1.17663	9.26919e-05	0.000110584	46	P08311	CTSG	Cathepsin G	CATG_HUMAN	1	126.048	2.26048	Dengue	QC	NaN	NaN	NaN	28.5723	0.224379
Dengue / QC	_LEDMEQALSPSVFK_	P05155;P05155-3	0.566656	0.566656	9.29867e-05	0.000110913	76	P05155;P05155-3	SERPING1	Plasma protease C1 inhibitor;Isoform 3 of Plasma protease C1 inhibitor	IC1_HUMAN	1	48.1086	1.48109	Dengue	QC	NaN	NaN	NaN	53.0513	0.156136
Dengue / QC	_KPVDEYK_	P02787	0.857374	0.857374	9.32445e-05	0.000111198	110	P02787	TF	Serotransferrin	TRFE_HUMAN	1	81.1737	1.81174	Dengue	QC	NaN	NaN	NaN	46.3537	0.189522
Dengue / QC	_LQEAAELEAVELPVPIR_	P02730	-0.228107	0.228107	9.36663e-05	0.00011161	12	P02730	SLC4A1	Band 3 anion transport protein	B3AT_HUMAN	1	-14.6246	0.853754	Dengue	QC	NaN	NaN	NaN	3.24313	0.0731625
Dengue / QC	_GRPKLLQLPLGFLYVHHTYVPAPPC[Carbamidomethyl (C)]TDFTR_	Q96PD5	0.923568	0.923568	9.37198e-05	0.000111629	82	Q96PD5	PGLYRP2	N-acetylmuramoyl-L-alanine amidase	PGRP2_HUMAN	1	89.6801	1.8968	Dengue	QC	NaN	NaN	NaN	67.6704	0.175604
Dengue / QC	_LTVDKSR_	P01857	0.812501	0.812501	9.43102e-05	0.000112287	156	P01857	IGHG1	Immunoglobulin heavy constant gamma 1	IGHG1_HUMAN	1	75.6254	1.75625	Dengue	QC	NaN	NaN	NaN	91.9039	0.196354
Dengue / QC	_NWGLGGHAFC[Carbamidomethyl (C)]RNPDNDIRPWC[Carbamidomethyl (C)]FVLNR_	P00748	1.58282	1.58282	9.4951e-05	0.000113004	22	P00748	F12	Coagulation factor XII	FA12_HUMAN	1	199.555	2.99555	Dengue	QC	NaN	NaN	NaN	17.0244	0.265193
Dengue / QC	_LDKPDVVNWMC[Carbamidomethyl (C)]YR_	P04180	0.239788	0.239788	9.66419e-05	0.000114923	68	P04180	LCAT	Phosphatidylcholine-sterol acyltransferase	LCAT_HUMAN	1	18.0819	1.18082	Dengue	QC	NaN	NaN	NaN	35.7725	0.0742243
Dengue / QC	_FISLGEAC[Carbamidomethyl (C)]KK_	P01024	0.217937	0.217937	9.7501e-05	0.000115828	114	P01024	C3	Complement C3	CO3_HUMAN	1	16.3069	1.16307	Dengue	QC	NaN	NaN	NaN	104.976	0.110838
Dengue / QC	_DTDLDGFPDEKLR_	G3XAP6;P49747	0.666526	0.666526	9.74912e-05	0.000115828	28	G3XAP6;P49747	COMP	Cartilage oligomeric matrix protein	G3XAP6_HUMAN;COMP_HUMAN	1	58.7246	1.58725	Dengue	QC	NaN	NaN	NaN	22.4994	0.210792
Dengue / QC	_NGVAQEPVHLDSPAIKHQFLLTGDTQGR_	P04217	0.671651	0.671651	9.98242e-05	0.000118301	168	P04217	A1BG	Alpha-1B-glycoprotein	A1BG_HUMAN	1	59.2895	1.59289	Dengue	QC	NaN	NaN	NaN	157.763	0.140534
Dengue / QC	_QALEEFQKEVSSC[Carbamidomethyl (C)]HC[Carbamidomethyl (C)]APC[Carbamidomethyl (C)]QGNGVPVLK_	P07358	0.538566	0.538566	0.000101222	0.000119813	40	P07358	C8B	Complement component C8 beta chain	CO8B_HUMAN	1	45.2528	1.45253	Dengue	QC	NaN	NaN	NaN	32.7994	0.141707
Dengue / QC	_DMYSFLEDM[Oxidation (M)]GLK_	P01023	0.627483	0.627483	0.000101287	0.000119842	68	P01023	A2M	Alpha-2-macroglobulin	A2MG_HUMAN	1	54.4867	1.54487	Dengue	QC	NaN	NaN	NaN	56.3513	0.121597
Dengue / QC	_YTHLSC[Carbamidomethyl (C)]DKVFC[Carbamidomethyl (C)]QPWQR_	E7ETH0;G3XAM2;P05156	0.590028	0.590028	0.000101386	0.000119935	108	E7ETH0;G3XAM2;P05156	CFI	Complement factor I	E7ETH0_HUMAN;G3XAM2_HUMAN;CFAI_HUMAN	1	50.5276	1.50528	Dengue	QC	NaN	NaN	NaN	87.5424	0.147197
Dengue / QC	_VSNKGLPSSIEK_	P01861	0.920915	0.920915	0.000103804	0.000122548	164	P01861	IGHG4	Immunoglobulin heavy constant gamma 4	IGHG4_HUMAN	1	89.3315	1.89332	Dengue	QC	NaN	NaN	NaN	116.283	0.279068
Dengue / QC	_YGTLFTMDR_	Q15582	0.527549	0.527549	0.000104005	0.000122737	36	Q15582	TGFBI	Transforming growth factor-beta-induced protein ig-h3	BGH3_HUMAN	1	44.1479	1.44148	Dengue	QC	NaN	NaN	NaN	26.295	0.129971
Dengue / QC	_ASSFLGEKASAGLLGAHAAAITAYALTLTKAPADLR_	P0C0L5	0.482698	0.482698	0.000104348	0.000123068	90	P0C0L5	C4B	Complement C4-B	CO4B_HUMAN	1	39.7355	1.39735	Dengue	QC	NaN	NaN	NaN	59.3355	0.14257
Dengue / QC	_DLHFLEELQLGHNR_	P35858;P35858-2	0.783238	0.783238	0.000104924	0.000123647	74	P35858;P35858-2	IGFALS	Insulin-like growth factor-binding protein complex acid labile subunit;Isoform 2 of Insulin-like growth factor-binding protein complex acid labile subunit	ALS_HUMAN	1	72.099	1.72099	Dengue	QC	NaN	NaN	NaN	33.4682	0.235895
Dengue / QC	_LDTLAQEVALLKEQQALQTVC[Carbamidomethyl (C)]LK_	E9PHK0;P05452	0.281681	0.281681	0.000105966	0.000124651	40	E9PHK0;P05452	CLEC3B	Tetranectin	E9PHK0_HUMAN;TETN_HUMAN	1	21.561	1.21561	Dengue	QC	NaN	NaN	NaN	25.8041	0.109938
Dengue / QC	_GDVAFVKHQTVPQNTGGKNPDPWAK_	P02787	0.67413	0.67413	0.000106458	0.00012518	154	P02787	TF	Serotransferrin	TRFE_HUMAN	1	59.5634	1.59563	Dengue	QC	NaN	NaN	NaN	142.728	0.142537
Dengue / QC	_LDNIYSSDK_	P04114	0.542453	0.542453	0.000106616	0.000125341	58	P04114	APOB	Apolipoprotein B-100	APOB_HUMAN	1	45.6447	1.45645	Dengue	QC	NaN	NaN	NaN	36.1248	0.0965907
Dengue / QC	_VNC[Carbamidomethyl (C)]LQTR_	P43652	0.878275	0.878275	0.000107264	0.000126026	18	P43652	AFM	Afamin	AFAM_HUMAN	1	83.8177	1.83818	Dengue	QC	NaN	NaN	NaN	11.1872	0.16279
Dengue / QC	_RPHETGGYMLEC[Carbamidomethyl (C)]VC[Carbamidomethyl (C)]LGNGK_	P02751;P02751-15;P02751-3;P02751-7	0.961314	0.961314	0.000107941	0.000126771	42	P02751;P02751-15;P02751-3;P02751-7	FN1	Fibronectin;Isoform 15 of Fibronectin;Isoform 3 of Fibronectin;Isoform 7 of Fibronectin	FINC_HUMAN	1	94.7082	1.94708	Dengue	QC	NaN	NaN	NaN	20.1753	0.165575
Dengue / QC	_EITALAPSTMK_	P60709	-0.376371	0.376371	0.000108835	0.000127694	172	P60709	ACTB	Actin, cytoplasmic 1	ACTB_HUMAN	1	-22.9627	0.770373	Dengue	QC	NaN	NaN	NaN	47.8506	0.115726
Dengue / QC	_QTAC[Carbamidomethyl (C)]KPEIAYAYK_	P01031	0.591188	0.591188	0.000109236	0.000128087	28	P01031	C5	Complement C5	CO5_HUMAN	1	50.6487	1.50649	Dengue	QC	NaN	NaN	NaN	13.2349	0.171203
Dengue / QC	_AITPPHPASQANIIFDITEGNLR_	P23142	0.48616	0.48616	0.000109302	0.000128139	152	P23142	FBLN1	Fibulin-1	FBLN1_HUMAN	1	40.0711	1.40071	Dengue	QC	NaN	NaN	NaN	107.376	0.103144
Dengue / QC	_MPYEC[Carbamidomethyl (C)]GPSLDVC[Carbamidomethyl (C)]AQDER_	P10643	0.302484	0.302484	0.000109684	0.000128562	174	P10643	C7	Complement component C7	CO7_HUMAN	1	23.3266	1.23327	Dengue	QC	NaN	NaN	NaN	128.676	0.0756296
Dengue / QC	_HSC[Carbamidomethyl (C)]QAEC[Carbamidomethyl (C)]SSELYTEASGYISSLEYPR_	B4DPQ0	0.342215	0.342215	0.000110318	0.000129279	176	B4DPQ0	C1R	Complement C1r subcomponent	B4DPQ0_HUMAN	1	26.7702	1.2677	Dengue	QC	NaN	NaN	NaN	73.966	0.0815059
Dengue / QC	_GPGGAWAAEVISNARENIQR_	P0DJI9	0.913553	0.913553	0.000110393	0.000129315	42	P0DJI9	SAA2	Serum amyloid A-2 protein	SAA2_HUMAN	1	88.3679	1.88368	Dengue	QC	NaN	NaN	NaN	37.7042	0.240156
Dengue / QC	_QAQC[Carbamidomethyl (C)]GQDFQC[Carbamidomethyl (C)]K_	P07357	0.537522	0.537522	0.000110643	0.000129582	100	P07357	C8A	Complement component C8 alpha chain	CO8A_HUMAN	1	45.1477	1.45148	Dengue	QC	NaN	NaN	NaN	46.0654	0.111239
Dengue / QC	_WQEEMELYRQK_	P02647	0.762319	0.762319	0.000110766	0.000129701	32	P02647	APOA1	Apolipoprotein A-I	APOA1_HUMAN	1	69.6215	1.69622	Dengue	QC	NaN	NaN	NaN	21.894	0.166138
Dengue / QC	_TVTAMDVVYALKR_	P62805	2.29908	2.29908	0.000111012	0.000129963	18	P62805	HIST1H4A	Histone H4	H4_HUMAN	1	392.145	4.92145	Dengue	QC	NaN	NaN	NaN	9.4186	0.410022
Dengue / QC	_LLIYAASTLQSGVPSR_	A0A0C4DH67	-0.517597	0.517597	0.000111203	0.00013016	160	A0A0C4DH67	IGKV1-8	Immunoglobulin kappa variable 1-8	KV108_HUMAN	1	-30.1465	0.698535	Dengue	QC	NaN	NaN	NaN	98.1593	0.113227
Dengue / QC	_VKENFDK_	P02753;Q5VY30	1.00734	1.00734	0.000111362	0.000130322	134	P02753;Q5VY30	RBP4	Retinol-binding protein 4;Retinol binding protein 4, plasma, isoform CRA_b	RET4_HUMAN;Q5VY30_HUMAN	1	101.021	2.01021	Dengue	QC	NaN	NaN	NaN	46.3352	0.171308
Dengue / QC	_KLTIFKTELR_	P04114	1.30301	1.30301	0.000111808	0.000130751	42	P04114	APOB	Apolipoprotein B-100	APOB_HUMAN	1	146.744	2.46744	Dengue	QC	NaN	NaN	NaN	26.9383	0.231699
Dengue / QC	_DNAK[Carboxy]NTLYLQMNSLR_	A0A075B7E8	0.868035	0.868035	0.000112272	0.000131229	70	A0A075B7E8	IGHV3OR16-13	Immunoglobulin heavy variable 3/OR16-13 (non-functional) (Fragment)	A0A075B7E8_HUMAN	1	82.5176	1.82518	Dengue	QC	NaN	NaN	NaN	55.0895	0.294011
Dengue / QC	_TPFDYC[Carbamidomethyl (C)]ALRR_	G3XAK1;P26927	0.89568	0.89568	0.00011262	0.00013161	98	G3XAK1;P26927	MST1	Hepatocyte growth factor-like protein	G3XAK1_HUMAN;HGFL_HUMAN	1	86.0486	1.86049	Dengue	QC	NaN	NaN	NaN	86.5496	0.173342
Dengue / QC	_ALRLPPTTTC[Carbamidomethyl (C)]QQQK_	B4E1Z4	0.524364	0.524364	0.000112861	0.000131813	110	B4E1Z4	NaN	cDNA FLJ55673, highly similar to Complement factor B (EC 3.4.21.47)	B4E1Z4_HUMAN	1	43.8299	1.4383	Dengue	QC	NaN	NaN	NaN	87.2237	0.123038
Dengue / QC	_NFATSNK_	P04114	0.600225	0.600225	0.000113015	0.00013194	20	P04114	APOB	Apolipoprotein B-100	APOB_HUMAN	1	51.5953	1.51595	Dengue	QC	NaN	NaN	NaN	14.1806	0.17654
Dengue / QC	_HQKTPENYPNAGLTMNYC[Carbamidomethyl (C)]R_	P00747	0.646203	0.646203	0.000113411	0.000132298	54	P00747	PLG	Plasminogen	PLMN_HUMAN	1	56.5044	1.56504	Dengue	QC	NaN	NaN	NaN	48.6287	0.137471
[truncated: 17,255 more rows]
