# Supplementary material for: Re-mining serum proteomics data reveals extensive post-translational modifications upon Zika and dengue infection
Source: Royal Society of Chemistry journal article supplement (doi:10.1039/d2mo00258b), 2023-02-15
Supplement: d2mo00258b4.xlsx [file d2mo00258b4.xlsx]

## Sheet: 200710_Zika_PTM_Formyl_HTRMS_ca
Comparison (group1/group2)	Group	ProteinGroups	AVG Log2 Ratio	Absolute AVG Log2 Ratio	Pvalue	Qvalue	# of Ratios	UniProtIds	Genes	ProteinDescriptions	ProteinNames	# Unique Total Peptides	% Change	Ratio	Condition Numerator	Condition Denominator	GO Cellular Component	GO Molecular Function	GO Biological Process	Degrees Of Freedom	Standard Error
Dengue / QC	_VEKFDLVPVPTNLYGDFFTGDAYVILK_	P06396	1.57684	1.57684	7.68576e-46	2.31572e-42	164	P06396	GSN	Gelsolin	GELS_HUMAN	1	198.316	2.98316	Dengue	QC	NaN	NaN	NaN	151.246	0.0727453
Dengue / QC	_DVDKEFYLFPTVFDENESLLLEDNIR_	P00450	1.63029	1.63029	8.23506e-42	1.65415e-38	168	P00450	CP	Ceruloplasmin	CERU_HUMAN	1	209.575	3.09575	Dengue	QC	NaN	NaN	NaN	162.857	0.087046
Dengue / QC	_TIDQMLNSELQWPVPDIYLR_	P04114	1.36676	1.36676	1.27711e-40	1.92397e-37	104	P04114	APOB	Apolipoprotein B-100	APOB_HUMAN	1	157.891	2.57891	Dengue	QC	NaN	NaN	NaN	92.7134	0.0650932
Dengue / QC	_YQEDTC[Carbamidomethyl (C)]YGDAGSAFAVHDLEEDTWYATGILSFDK_	P00738	1.51678	1.51678	1.40215e-37	9.38819e-35	164	P00738	HP	Haptoglobin	HPT_HUMAN	1	186.152	2.86152	Dengue	QC	NaN	NaN	NaN	153.758	0.0881584
Dengue / QC	_YSQPEDSLIPFFEITVPESQLTVSQFTLPK_	P04114	1.20012	1.20012	2.29131e-37	1.38074e-34	170	P04114	APOB	Apolipoprotein B-100	APOB_HUMAN	1	129.759	2.29759	Dengue	QC	NaN	NaN	NaN	115.892	0.064609
Dengue / QC	_AKSPPTMVDSLLAVTLAGNLGLTFLR_	Q96PD5	1.68331	1.68331	7.33766e-37	4.01971e-34	138	Q96PD5	PGLYRP2	N-acetylmuramoyl-L-alanine amidase	PGRP2_HUMAN	1	221.163	3.21163	Dengue	QC	NaN	NaN	NaN	130.006	0.0946839
Dengue / QC	_TLADLTLLDSPIKVPLLLSEPINIIDALEMR_	P04114	2.24284	2.24284	8.23149e-37	4.13358e-34	144	P04114	APOB	Apolipoprotein B-100	APOB_HUMAN	1	373.328	4.73328	Dengue	QC	NaN	NaN	NaN	123.97	0.137206
Dengue / QC	_AVYTC[Carbamidomethyl (C)]NEGYQLLGEINYREC[Carbamidomethyl (C)]DTDGWTNDIPIC[Carbamidomethyl (C)]EVVK_	P08603	-0.502352	0.502352	3.19904e-35	1.0146e-32	44	P08603	CFH	Complement factor H	CFAH_HUMAN	1	-29.4045	0.705955	Dengue	QC	NaN	NaN	NaN	36.9233	0.145608
Dengue / QC	_VFPLSLC[Carbamidomethyl (C)]STQPDGNVVIAC[Carbamidomethyl (C)]LVQGFFPQEPLSVTWSESGQGVTAR_	P01876	1.87444	1.87444	1.15266e-34	3.3076e-32	166	P01876	IGHA1	Immunoglobulin heavy constant alpha 1	IGHA1_HUMAN	1	266.658	3.66658	Dengue	QC	NaN	NaN	NaN	158.662	0.125387
Dengue / QC	_LYLKHQMDLVATLSQLGLQELFQAPDLR_	P08697	1.72194	1.72194	2.00802e-34	5.261e-32	164	P08697	SERPINF2	Alpha-2-antiplasmin	A2AP_HUMAN	1	229.88	3.2988	Dengue	QC	NaN	NaN	NaN	152.201	0.101107
Dengue / QC	_FFESFGDLSTPDAVM[Oxidation (M)]GNPK_	P68871	0.829225	0.829225	2.48058e-34	6.22833e-32	98	P68871	HBB	Hemoglobin subunit beta	HBB_HUMAN	1	77.6731	1.77673	Dengue	QC	NaN	NaN	NaN	90.0746	0.042389
Dengue / QC	_YDPSLKPLSVSYDQATSLR_	P00918	1.15732	1.15732	2.1691e-33	5.02731e-31	96	P00918	CA2	Carbonic anhydrase 2	CAH2_HUMAN	1	123.042	2.23042	Dengue	QC	NaN	NaN	NaN	77.9056	0.0620221
Dengue / QC	_QGQIIYNWQGAQSTQDEVAASAILTAQLDEELGGTPVQSR_	P06396	1.23187	1.23187	2.31472e-33	5.16611e-31	162	P06396	GSN	Gelsolin	GELS_HUMAN	1	134.871	2.34871	Dengue	QC	NaN	NaN	NaN	134.183	0.0770087
Dengue / QC	_TAMDVFVC[Carbamidomethyl (C)]TYFMPAAQLPELPDVELPTNKDVC[Carbamidomethyl (C)]DPGNTK_	P02774;P02774-3	1.17217	1.17217	3.14155e-33	6.76106e-31	168	P02774;P02774-3	GC	Vitamin D-binding protein;Isoform 3 of Vitamin D-binding protein	VTDB_HUMAN	1	125.35	2.2535	Dengue	QC	NaN	NaN	NaN	144.507	0.0783137
Dengue / QC	_LRLEPGKEYLIM[Oxidation (M)]GLDGATYDLEGHPQYLLDSNSWIEEMPSER_	P0C0L5	0.658503	0.658503	3.65164e-33	7.58786e-31	108	P0C0L5	C4B	Complement C4-B	CO4B_HUMAN	1	57.8444	1.57844	Dengue	QC	NaN	NaN	NaN	85.2996	0.158079
Dengue / QC	_SGAGTEDSAC[Carbamidomethyl (C)]IPWAYYSTVDQVKDLYSGLIGPLIVC[Carbamidomethyl (C)]R_	P00450	1.58549	1.58549	4.16993e-32	7.17943e-30	166	P00450	CP	Ceruloplasmin	CERU_HUMAN	1	200.109	3.00109	Dengue	QC	NaN	NaN	NaN	152.973	0.107159
Dengue / QC	_TAMDVFVC[Carbamidomethyl (C)]TYFMPAAQLPELPDVELPTNK_	P02774;P02774-3	1.15175	1.15175	6.11508e-32	9.95931e-30	146	P02774;P02774-3	GC	Vitamin D-binding protein;Isoform 3 of Vitamin D-binding protein	VTDB_HUMAN	1	122.183	2.22183	Dengue	QC	NaN	NaN	NaN	114.602	0.0734674
Dengue / QC	_IHEDSDSALQLQDFYQEVANPLLTAVTFEYPSNAVEEVTQNNFR_	Q14624	1.54746	1.54746	8.49232e-32	1.31217e-29	160	Q14624	ITIH4	Inter-alpha-trypsin inhibitor heavy chain H4	ITIH4_HUMAN	1	192.301	2.92301	Dengue	QC	NaN	NaN	NaN	148.795	0.0989104
Dengue / QC	_DVFLGMFLYEYAR_	P02768	1.05505	1.05505	2.01377e-31	3.03374e-29	176	P02768	ALB	Serum albumin	ALBU_HUMAN	1	107.78	2.0778	Dengue	QC	NaN	NaN	NaN	170.347	0.0753336
Dengue / QC	_TDGC[Carbamidomethyl (C)]QHFC[Carbamidomethyl (C)]LPGQESYTC[Carbamidomethyl (C)]SC[Carbamidomethyl (C)]AQGYR_	P22891;P22891-2	1.22267	1.22267	9.99258e-31	1.4337e-28	82	P22891;P22891-2	PROZ	Vitamin K-dependent protein Z;Isoform 2 of Vitamin K-dependent protein Z	PROZ_HUMAN	1	133.378	2.33378	Dengue	QC	NaN	NaN	NaN	68.6681	0.116038
Dengue / QC	_WNPEVDC[Carbamidomethyl (C)]TEKR_	Q9BXR6	1.1869	1.1869	1.13654e-30	1.59275e-28	38	Q9BXR6	CFHR5	Complement factor H-related protein 5	FHR5_HUMAN	1	127.663	2.27663	Dengue	QC	NaN	NaN	NaN	28.0511	0.144634
Dengue / QC	_GTELQHLLHAVVPGPWQEDVADAEEC[Carbamidomethyl (C)]AGR_	G3XAK1;P26927	1.20733	1.20733	1.94292e-30	2.61473e-28	130	G3XAK1;P26927	MST1	Hepatocyte growth factor-like protein	G3XAK1_HUMAN;HGFL_HUMAN	1	130.91	2.3091	Dengue	QC	NaN	NaN	NaN	117.627	0.100461
Dengue / QC	_GGPLDGTYR_	P00918	1.22219	1.22219	6.30515e-30	7.44997e-28	62	P00918	CA2	Carbonic anhydrase 2	CAH2_HUMAN	1	133.3	2.333	Dengue	QC	NaN	NaN	NaN	52.5139	0.0559033
Dengue / QC	_ESATITC[Carbamidomethyl (C)]LVTGFSPADVFVQWMQR_	P01871	1.28761	1.28761	6.75369e-30	7.82649e-28	172	P01871	IGHM	Immunoglobulin heavy constant mu	IGHM_HUMAN	1	144.123	2.44123	Dengue	QC	NaN	NaN	NaN	137.334	0.0871555
Dengue / QC	_LRVDPVNFK_	P69905	1.60817	1.60817	3.35092e-29	3.54257e-27	54	P69905	HBA1	Hemoglobin subunit alpha	HBA_HUMAN	1	204.864	3.04864	Dengue	QC	NaN	NaN	NaN	37.9104	0.0546687
Dengue / QC	_V[Formyl (Protein N-term)]LSPADKTNVK_	P69905	1.41111	1.41111	4.13431e-29	4.2226e-27	60	P69905	HBA1	Hemoglobin subunit alpha	HBA_HUMAN	1	165.942	2.65942	Dengue	QC	NaN	NaN	NaN	34.2275	0.20854
Dengue / QC	_KAGTELVNFLSYFVELGTQPATQ_	P02652;V9GYM3	1.12261	1.12261	7.27875e-29	7.19045e-27	138	P02652;V9GYM3	APOA2	Apolipoprotein A-II	APOA2_HUMAN;V9GYM3_HUMAN	1	117.741	2.17741	Dengue	QC	NaN	NaN	NaN	114.927	0.0859515
Dengue / QC	_EVYMPSSIFQDDFVIPDISEPGTWK_	P0C0L5	1.02096	1.02096	1.60319e-28	1.42071e-26	176	P0C0L5	C4B	Complement C4-B	CO4B_HUMAN	1	102.927	2.02927	Dengue	QC	NaN	NaN	NaN	135.451	0.0750976
Dengue / QC	_YRGDQDATMSILDISMMTGFAPDTDDLK_	P01024	1.10015	1.10015	1.72054e-28	1.48114e-26	146	P01024	C3	Complement C3	CO3_HUMAN	1	114.378	2.14378	Dengue	QC	NaN	NaN	NaN	130.031	0.0791994
Dengue / QC	_VLGAFSDGLAHLDNLK_	P68871	1.56943	1.56943	2.15556e-28	1.80409e-26	48	P68871	HBB	Hemoglobin subunit beta	HBB_HUMAN	1	196.788	2.96788	Dengue	QC	NaN	NaN	NaN	38.8457	0.0475151
Dengue / QC	_GAVYVYFGSK_	P80108	1.40366	1.40366	2.99636e-28	2.47343e-26	80	P80108	GPLD1	Phosphatidylinositol-glycan-specific phospholipase D	PHLD_HUMAN	1	164.572	2.64572	Dengue	QC	NaN	NaN	NaN	64.4073	0.109742
Dengue / QC	_DLEVVAATPTSLLISWDAPAVTVR_	P02751;P02751-15;P02751-3;P02751-7	1.32458	1.32458	3.66909e-28	2.94799e-26	166	P02751;P02751-15;P02751-3;P02751-7	FN1	Fibronectin;Isoform 15 of Fibronectin;Isoform 3 of Fibronectin;Isoform 7 of Fibronectin	FINC_HUMAN	1	150.46	2.5046	Dengue	QC	NaN	NaN	NaN	155.664	0.101936
Dengue / QC	_PYTFHSHGITYYK_	P00450	-0.245953	0.245953	4.26059e-28	3.33433e-26	74	P00450	CP	Ceruloplasmin	CERU_HUMAN	1	-15.6741	0.843259	Dengue	QC	NaN	NaN	NaN	38.2845	0.221254
Dengue / QC	_VADALTNAVAHVDDM[Oxidation (M)]PNALSALSDLHAHK_	P69905	1.32659	1.32659	4.80972e-28	3.62292e-26	98	P69905	HBA1	Hemoglobin subunit alpha	HBA_HUMAN	1	150.809	2.50809	Dengue	QC	NaN	NaN	NaN	81.4938	0.0610862
Dengue / QC	_QAQQMVQPQSPVAVSQSKPGC[Carbamidomethyl (C)]YDNGK_	P02751;P02751-15;P02751-3;P02751-7	0.372531	0.372531	6.70069e-27	4.58845e-25	126	P02751;P02751-15;P02751-3;P02751-7	FN1	Fibronectin;Isoform 15 of Fibronectin;Isoform 3 of Fibronectin;Isoform 7 of Fibronectin	FINC_HUMAN	1	29.4622	1.29462	Dengue	QC	NaN	NaN	NaN	54.3837	0.239251
Dengue / QC	_VPLLLSEPINIIDALEMR_	P04114	0.861079	0.861079	7.43552e-27	5.03443e-25	168	P04114	APOB	Apolipoprotein B-100	APOB_HUMAN	1	81.6397	1.8164	Dengue	QC	NaN	NaN	NaN	145.396	0.0713697
Dengue / QC	_LTVDKSRWQEGNVFSC[Carbamidomethyl (C)]SVMHEALHNHYTQK_	P01861	1.4487	1.4487	1.26277e-26	8.1822e-25	84	P01861	IGHG4	Immunoglobulin heavy constant gamma 4	IGHG4_HUMAN	1	172.962	2.72962	Dengue	QC	NaN	NaN	NaN	39.131	0.391684
Dengue / QC	_AAPSVTLFPPSSEELQANKATLVC[Carbamidomethyl (C)]LISDFYPGAVTVAWK_	P0DOY2	1.88047	1.88047	2.45525e-26	1.49448e-24	168	P0DOY2	IGLC2	Immunoglobulin lambda constant 2	IGLC2_HUMAN	1	268.195	3.68195	Dengue	QC	NaN	NaN	NaN	144.95	0.151634
Dengue / QC	_SWVPHTFESELSDPVELLVAES_	P04217	0.802551	0.802551	3.37308e-26	2.03262e-24	176	P04217	A1BG	Alpha-1B-glycoprotein	A1BG_HUMAN	1	74.4183	1.74418	Dengue	QC	NaN	NaN	NaN	139.44	0.0683651
Dengue / QC	_SLFTDLVAEKDLFHC[Carbamidomethyl (C)]VSFTLPR_	P20742	2.5647	2.5647	3.67562e-26	2.193e-24	66	P20742	PZP	Pregnancy zone protein	PZP_HUMAN	1	491.631	5.91631	Dengue	QC	NaN	NaN	NaN	53.3844	0.120738
Dengue / QC	_DC[Carbamidomethyl (C)]QDIANK_	P02679;P02679-2	5.77623	5.77623	5.99207e-26	3.34336e-24	44	P02679;P02679-2	FGG	Fibrinogen gamma chain;Isoform Gamma-A of Fibrinogen gamma chain	FIBG_HUMAN	1	5380.47	54.8047	Dengue	QC	NaN	NaN	NaN	35.7798	0.217038
Dengue / QC	_WTGRPTC[Carbamidomethyl (C)]RDTSC[Carbamidomethyl (C)]VNPPTVQNAYIVSR_	P08603	8.22148	8.22148	1.05075e-25	5.70432e-24	30	P08603	CFH	Complement factor H	CFAH_HUMAN	1	29747.8	298.478	Dengue	QC	NaN	NaN	NaN	23.9853	0.287861
Dengue / QC	_LHLETDSLALVALGALDTALYAAGSK_	P0C0L5	0.982511	0.982511	1.17651e-25	6.27405e-24	174	P0C0L5	C4B	Complement C4-B	CO4B_HUMAN	1	97.5902	1.9759	Dengue	QC	NaN	NaN	NaN	155.023	0.0831107
Dengue / QC	_VQLSNDFDEYIMAIEQTIK_	P01024	0.834155	0.834155	1.32595e-25	7.00894e-24	176	P01024	C3	Complement C3	CO3_HUMAN	1	78.2812	1.78281	Dengue	QC	NaN	NaN	NaN	113.182	0.0624806
Dengue / QC	_KDDIMLDEGMLQSLMELPDQYNYGMYAK_	P07357	0.888797	0.888797	1.84372e-25	9.33633e-24	112	P07357	C8A	Complement component C8 alpha chain	CO8A_HUMAN	1	85.1632	1.85163	Dengue	QC	NaN	NaN	NaN	78.7175	0.0657691
Dengue / QC	_RIHEDSDSALQLQDFYQEVANPLLTAVTFEYPSNAVEEVTQNNFR_	Q14624	1.23	1.23	4.25006e-25	2.08219e-23	166	Q14624	ITIH4	Inter-alpha-trypsin inhibitor heavy chain H4	ITIH4_HUMAN	1	134.567	2.34567	Dengue	QC	NaN	NaN	NaN	101.285	0.0927187
Dengue / QC	_VPTADLEDVLPLAEDITNILSK_	P02774;P02774-3	0.992726	0.992726	6.16934e-25	2.8379e-23	176	P02774;P02774-3	GC	Vitamin D-binding protein;Isoform 3 of Vitamin D-binding protein	VTDB_HUMAN	1	98.9942	1.98994	Dengue	QC	NaN	NaN	NaN	170.676	0.0869903
Dengue / QC	_KPLEKAVANFFSGSC[Carbamidomethyl (C)]APC[Carbamidomethyl (C)]ADGTDFPQLC[Carbamidomethyl (C)]QLC[Carbamidomethyl (C)]PGC[Carbamidomethyl (C)]GC[Carbamidomethyl (C)]STLNQYFGYSGAFK_	P02787	-0.828095	0.828095	6.93873e-25	3.14382e-23	60	P02787	TF	Serotransferrin	TRFE_HUMAN	1	-43.6728	0.563272	Dengue	QC	NaN	NaN	NaN	38.5586	0.167841
Dengue / QC	_YGGGFYSTQDTINAIEGLTEYSLLVK_	P01031	0.832893	0.832893	1.40996e-24	6.11251e-23	146	P01031	C5	Complement C5	CO5_HUMAN	1	78.1254	1.78125	Dengue	QC	NaN	NaN	NaN	119.648	0.0681114
Dengue / QC	_LYLKHQM[Oxidation (M)]DLVATLSQLGLQELFQAPDLR_	P08697	1.2926	1.2926	1.57811e-24	6.79265e-23	116	P08697	SERPINF2	Alpha-2-antiplasmin	A2AP_HUMAN	1	144.969	2.44969	Dengue	QC	NaN	NaN	NaN	92.0727	0.141434
Dengue / QC	_MDWLVPATC[Carbamidomethyl (C)]EPIQSVFFFSGDK_	P04004	0.975697	0.975697	1.68742e-24	7.21161e-23	132	P04004	VTN	Vitronectin	VTNC_HUMAN	1	96.6592	1.96659	Dengue	QC	NaN	NaN	NaN	125.809	0.0836133
Dengue / QC	_YIYPLDSLTWIEYWPR_	P01031	1.24612	1.24612	1.97367e-24	8.37558e-23	86	P01031	C5	Complement C5	CO5_HUMAN	1	137.203	2.37203	Dengue	QC	NaN	NaN	NaN	45.5374	0.0774974
Dengue / QC	_HQMDLVATLSQLGLQELFQAPDLR_	P08697	1.04528	1.04528	2.53313e-24	1.04552e-22	172	P08697	SERPINF2	Alpha-2-antiplasmin	A2AP_HUMAN	1	106.376	2.06376	Dengue	QC	NaN	NaN	NaN	152.597	0.0840123
Dengue / QC	_SGLSTGWTQLSKLLELTGPKSLPAPWLSMAPVSWITPGLK_	P04217	1.35637	1.35637	3.03168e-24	1.22798e-22	162	P04217	A1BG	Alpha-1B-glycoprotein	A1BG_HUMAN	1	156.04	2.5604	Dengue	QC	NaN	NaN	NaN	146.453	0.128582
Dengue / QC	_ANPTVTLFPPSSEELQANKATLVC[Carbamidomethyl (C)]LISDFYPGAVTVAWK_	A0A0B4J231;B9A064	1.7727	1.7727	4.2968e-24	1.71474e-22	166	A0A0B4J231;B9A064	IGLL5	Immunoglobulin lambda-like polypeptide 5	A0A0B4J231_HUMAN;IGLL5_HUMAN	1	241.693	3.41693	Dengue	QC	NaN	NaN	NaN	159.045	0.144006
Dengue / QC	_NGESVKLHLETDSLALVALGALDTALYAAGSK_	P0C0L5	1.50787	1.50787	6.83546e-24	2.64041e-22	158	P0C0L5	C4B	Complement C4-B	CO4B_HUMAN	1	184.389	2.84389	Dengue	QC	NaN	NaN	NaN	138.46	0.111361
Dengue / QC	_SDLGAVISLLLWGR_	P00739	1.03307	1.03307	8.95132e-24	3.41397e-22	134	P00739	HPR	Haptoglobin-related protein	HPTR_HUMAN	1	104.638	2.04638	Dengue	QC	NaN	NaN	NaN	101.479	0.103474
Dengue / QC	_TTENYPNAGLIMNYC[Carbamidomethyl (C)]R_	P08519	1.72362	1.72362	1.12854e-23	4.25036e-22	52	P08519	LPA	Apolipoprotein(a)	APOA_HUMAN	1	230.263	3.30263	Dengue	QC	NaN	NaN	NaN	44.2321	0.115591
Dengue / QC	_QDSLSSQNQLGVLPLSWDIPELVNMGQWK_	P01024	0.982783	0.982783	1.14344e-23	4.27974e-22	152	P01024	C3	Complement C3	CO3_HUMAN	1	97.6274	1.97627	Dengue	QC	NaN	NaN	NaN	139.349	0.0788467
Dengue / QC	_WVQTLSEQVQEELLSSQVTQELR_	P02649	1.54552	1.54552	1.29646e-23	4.7637e-22	74	P02649	APOE	Apolipoprotein E	APOE_HUMAN	1	191.909	2.91909	Dengue	QC	NaN	NaN	NaN	65.0549	0.117041
Dengue / QC	_LSLESLTSYFSIESSTKGDVK_	P04114	0.756911	0.756911	1.97812e-23	7.05336e-22	152	P04114	APOB	Apolipoprotein B-100	APOB_HUMAN	1	68.9869	1.68987	Dengue	QC	NaN	NaN	NaN	145.275	0.0752402
Dengue / QC	_SELTQQLNALFQDK_	P06727	1.19669	1.19669	2.47484e-23	8.77257e-22	72	P06727	APOA4	Apolipoprotein A-IV	APOA4_HUMAN	1	129.213	2.29213	Dengue	QC	NaN	NaN	NaN	65.8147	0.10066
Dengue / QC	_QSMTLSSEVQIPDFDVDLGTILR_	P04114	1.35001	1.35001	3.32242e-23	1.17081e-21	144	P04114	APOB	Apolipoprotein B-100	APOB_HUMAN	1	154.913	2.54913	Dengue	QC	NaN	NaN	NaN	81.9111	0.115591
Dengue / QC	_QSM[Oxidation (M)]TLSSEVQIPDFDVDLGTILR_	P04114	1.57116	1.57116	3.42071e-23	1.19844e-21	120	P04114	APOB	Apolipoprotein B-100	APOB_HUMAN	1	197.143	2.97143	Dengue	QC	NaN	NaN	NaN	53.3119	0.0710375
Dengue / QC	_DGWHSWPIAHQWPQGPSAVDAAFSWEEK_	P02790	1.16392	1.16392	4.55467e-23	1.56837e-21	146	P02790	HPX	Hemopexin	HEMO_HUMAN	1	124.065	2.24065	Dengue	QC	NaN	NaN	NaN	131.814	0.0944509
Dengue / QC	_TLLLVGSPTWK_	P80108	1.26808	1.26808	6.88402e-23	2.31749e-21	80	P80108	GPLD1	Phosphatidylinositol-glycan-specific phospholipase D	PHLD_HUMAN	1	140.841	2.40841	Dengue	QC	NaN	NaN	NaN	68.4135	0.0944358
Dengue / QC	_MRKDDIMLDEGMLQSLMELPDQYNYGMYAK_	P07357	0.913626	0.913626	8.58574e-23	2.85844e-21	102	P07357	C8A	Complement component C8 alpha chain	CO8A_HUMAN	1	88.3774	1.88377	Dengue	QC	NaN	NaN	NaN	62.4267	0.0742553
Dengue / QC	_VQLSNDFDEYIM[Oxidation (M)]AIEQTIK_	P01024	1.24502	1.24502	9.70905e-23	3.21465e-21	176	P01024	C3	Complement C3	CO3_HUMAN	1	137.022	2.37022	Dengue	QC	NaN	NaN	NaN	145.912	0.0776182
Dengue / QC	_GLPNVVTSAISLPNIR_	Q92954-3	1.29704	1.29704	1.18858e-22	3.90438e-21	80	Q92954-3	PRG4	Isoform C of Proteoglycan 4	PRG4_HUMAN	1	145.725	2.45725	Dengue	QC	NaN	NaN	NaN	65.1839	0.11508
Dengue / QC	_PGQAPVLVIYGK_	P01714	1.39055	1.39055	2.00425e-22	6.22556e-21	40	P01714	IGLV3-19	Immunoglobulin lambda variable 3-19	LV319_HUMAN	1	162.178	2.62178	Dengue	QC	NaN	NaN	NaN	33.7008	0.183695
Dengue / QC	_EPGQDLVVLPLSITTDFIPSFR_	P01024	0.879096	0.879096	2.03977e-22	6.30342e-21	176	P01024	C3	Complement C3	CO3_HUMAN	1	83.9222	1.83922	Dengue	QC	NaN	NaN	NaN	123.615	0.0748025
Dengue / QC	_VWPQQPSGELFEIEIDTLETTC[Carbamidomethyl (C)]HVLDPTPVAR_	P02765	0.992671	0.992671	2.06813e-22	6.35844e-21	154	P02765	AHSG	Alpha-2-HS-glycoprotein	FETUA_HUMAN	1	98.9865	1.98987	Dengue	QC	NaN	NaN	NaN	125.776	0.0838064
Dengue / QC	_VETVDRFQILTLWLPDSLTTWEIHGLSLSK_	P0C0L5	2.32058	2.32058	2.39436e-22	7.25949e-21	82	P0C0L5	C4B	Complement C4-B	CO4B_HUMAN	1	399.534	4.99534	Dengue	QC	NaN	NaN	NaN	66.6946	0.138595
Dengue / QC	_SSTSPTTNVLLSPLSVATALSALSLGAEQR_	P36955	0.921295	0.921295	2.67748e-22	8.06726e-21	172	P36955	SERPINF1	Pigment epithelium-derived factor	PEDF_HUMAN	1	89.3814	1.89381	Dengue	QC	NaN	NaN	NaN	142.373	0.111901
Dengue / QC	_LPEGSVSLIILLTDGDPTVGETNPR_	Q14624	1.01145	1.01145	2.80755e-22	8.41706e-21	126	Q14624	ITIH4	Inter-alpha-trypsin inhibitor heavy chain H4	ITIH4_HUMAN	1	101.594	2.01594	Dengue	QC	NaN	NaN	NaN	92.867	0.0878294
Dengue / QC	_PSETTLC[Carbamidomethyl (C)]QVAGWGHQFEGAEEYASFLQEAQVPFLSLER_	P00748	1.7312	1.7312	3.40494e-22	1.01575e-20	98	P00748	F12	Coagulation factor XII	FA12_HUMAN	1	232.004	3.32004	Dengue	QC	NaN	NaN	NaN	71.9688	0.103965
Dengue / QC	_EPC[Carbamidomethyl (C)]VESLVSQYFQTVTDYGKDLM[Oxidation (M)]EK_	P02652;V9GYM3	1.22403	1.22403	3.45989e-22	1.02706e-20	104	P02652;V9GYM3	APOA2	Apolipoprotein A-II	APOA2_HUMAN;V9GYM3_HUMAN	1	133.599	2.33599	Dengue	QC	NaN	NaN	NaN	82.3425	0.0756617
Dengue / QC	_AALTELSLGSAYQAMILGVDSK_	P04114	1.49204	1.49204	3.72901e-22	1.10152e-20	54	P04114	APOB	Apolipoprotein B-100	APOB_HUMAN	1	181.286	2.81286	Dengue	QC	NaN	NaN	NaN	39.9052	0.118176
Dengue / QC	_REDFDVEAADSAGNC[Carbamidomethyl (C)]LDSLVFVAGDR_	P09871	1.24943	1.24943	5.77171e-22	1.65621e-20	108	P09871	C1S	Complement C1s subcomponent	C1S_HUMAN	1	137.748	2.37748	Dengue	QC	NaN	NaN	NaN	94.8562	0.101896
Dengue / QC	_GSSTWLTAFVLKVLSLAQEQVGGSPEK_	P0C0L5	1.09215	1.09215	1.07832e-21	2.96711e-20	100	P0C0L5	C4B	Complement C4-B	CO4B_HUMAN	1	113.191	2.13191	Dengue	QC	NaN	NaN	NaN	60.9162	0.103737
Dengue / QC	_MYYSAVEPTK_	E9PFZ2	2.05852	2.05852	1.65929e-21	4.46378e-20	54	E9PFZ2	CP	Ceruloplasmin	E9PFZ2_HUMAN	1	316.559	4.16559	Dengue	QC	NaN	NaN	NaN	29.4436	0.0907294
Dengue / QC	_AVPPNNSNAAEDDLPTVELQGVVPR_	P00488	1.22327	1.22327	2.44612e-21	6.38108e-20	78	P00488	F13A1	Coagulation factor XIII A chain	F13A_HUMAN	1	133.475	2.33475	Dengue	QC	NaN	NaN	NaN	59.6521	0.114968
Dengue / QC	_SGLSTGWTQLSKLLELTGPKSLPAPWLSM[Oxidation (M)]APVSWITPGLK_	P04217	1.26994	1.26994	2.93303e-21	7.55318e-20	90	P04217	A1BG	Alpha-1B-glycoprotein	A1BG_HUMAN	1	141.152	2.41152	Dengue	QC	NaN	NaN	NaN	48.6923	0.232062
Dengue / QC	_LTVDKSRWQQGNVFSC[Carbamidomethyl (C)]SVM[Oxidation (M)]HEALHNHYTQK_	P01857	1.0898	1.0898	3.0039e-21	7.70277e-20	74	P01857	IGHG1	Immunoglobulin heavy constant gamma 1	IGHG1_HUMAN	1	112.844	2.12844	Dengue	QC	NaN	NaN	NaN	42.4942	0.510021
Dengue / QC	_QDGSVDFGRK_	P02675	5.33981	5.33981	3.3085e-21	8.41225e-20	36	P02675	FGB	Fibrinogen beta chain	FIBB_HUMAN	1	3949.9	40.499	Dengue	QC	NaN	NaN	NaN	31.2201	0.200064
Dengue / QC	_TSTADYAM[Oxidation (M)]FK_	P02679;P02679-2	4.24587	4.24587	7.2733e-21	1.76729e-19	32	P02679;P02679-2	FGG	Fibrinogen gamma chain;Isoform Gamma-A of Fibrinogen gamma chain	FIBG_HUMAN	1	1797.3	18.973	Dengue	QC	NaN	NaN	NaN	24.0744	0.12638
Dengue / QC	_TGC[Carbamidomethyl (C)]SLMGASVDSTLAFNTYVHFQGK_	P01019	0.15885	0.15885	7.82748e-21	1.88674e-19	48	P01019	AGT	Angiotensinogen	ANGT_HUMAN	1	11.6397	1.1164	Dengue	QC	NaN	NaN	NaN	24.6946	0.262827
Dengue / QC	_MYYSAVEPTKDIFTGLIGPM[Oxidation (M)]K_	E9PFZ2	2.49907	2.49907	8.52413e-21	2.04647e-19	62	E9PFZ2	CP	Ceruloplasmin	E9PFZ2_HUMAN	1	465.322	5.65322	Dengue	QC	NaN	NaN	NaN	45.5543	0.157083
Dengue / QC	_LVYHLGLPFSFLTFPYVEEAIK_	A0A182DWH7;P49908	0.913105	0.913105	1.03373e-20	2.44285e-19	96	A0A182DWH7;P49908	SELENOP	Selenoprotein P (Fragment);Selenoprotein P	A0A182DWH7_HUMAN;SEPP1_HUMAN	1	88.3094	1.88309	Dengue	QC	NaN	NaN	NaN	84.7538	0.0888402
Dengue / QC	_VFKDVFLEMNIPYSVVR_	P01031	0.836259	0.836259	1.07224e-20	2.51613e-19	114	P01031	C5	Complement C5	CO5_HUMAN	1	78.5415	1.78541	Dengue	QC	NaN	NaN	NaN	90.3119	0.0835414
Dengue / QC	_QVLLVGAPTYDDVSK_	P80108	0.734975	0.734975	1.08813e-20	2.54151e-19	56	P80108	GPLD1	Phosphatidylinositol-glycan-specific phospholipase D	PHLD_HUMAN	1	66.4368	1.66437	Dengue	QC	NaN	NaN	NaN	44.3067	0.0875362
Dengue / QC	_GYSFTTTAER_	P60709	1.23303	1.23303	1.43207e-20	3.29377e-19	24	P60709	ACTB	Actin, cytoplasmic 1	ACTB_HUMAN	1	135.06	2.3506	Dengue	QC	NaN	NaN	NaN	15.9404	0.102159
Dengue / QC	_VPLLLSEPINIIDALEM[Oxidation (M)]R_	P04114	1.03694	1.03694	1.47364e-20	3.37649e-19	92	P04114	APOB	Apolipoprotein B-100	APOB_HUMAN	1	105.187	2.05187	Dengue	QC	NaN	NaN	NaN	80.348	0.0959795
Dengue / QC	_FGGVLHLSDLDDDGLDEIIMAAPLR_	P80108	0.858722	0.858722	1.78112e-20	4.03971e-19	162	P80108	GPLD1	Phosphatidylinositol-glycan-specific phospholipase D	PHLD_HUMAN	1	81.3431	1.81343	Dengue	QC	NaN	NaN	NaN	133.142	0.0897501
Dengue / QC	_M[Oxidation (M)]ELERPGGNEITR_	P02671	5.8329	5.8329	1.78321e-20	4.03971e-19	38	P02671	FGA	Fibrinogen alpha chain	FIBA_HUMAN	1	5600.03	57.0003	Dengue	QC	NaN	NaN	NaN	27.8775	0.220415
Dengue / QC	_MGPTVSPIC[Carbamidomethyl (C)]LPGTSSDYNLMDGDLGLISGWGR_	P09871	0.644006	0.644006	1.8406e-20	4.15409e-19	172	P09871	C1S	Complement C1s subcomponent	C1S_HUMAN	1	56.2663	1.56266	Dengue	QC	NaN	NaN	NaN	111.835	0.0652786
Dengue / QC	_ALEFLQLHNGR_	P80108	1.12705	1.12705	1.85177e-20	4.16373e-19	60	P80108	GPLD1	Phosphatidylinositol-glycan-specific phospholipase D	PHLD_HUMAN	1	118.411	2.18411	Dengue	QC	NaN	NaN	NaN	52.1318	0.0924634
Dengue / QC	_ADSQAQLLLSTVVGVFTAPGLHLKQPFVQGLALYTPVVLPR_	P01019	0.795263	0.795263	1.86484e-20	4.17752e-19	162	P01019	AGT	Angiotensinogen	ANGT_HUMAN	1	73.5393	1.73539	Dengue	QC	NaN	NaN	NaN	148.157	0.083694
Dengue / QC	_SFEGLGQLEVLTLDHNQLQEVK_	P35858;P35858-2	1.07721	1.07721	1.89664e-20	4.23301e-19	96	P35858;P35858-2	IGFALS	Insulin-like growth factor-binding protein complex acid labile subunit;Isoform 2 of Insulin-like growth factor-binding protein complex acid labile subunit	ALS_HUMAN	1	110.994	2.10994	Dengue	QC	NaN	NaN	NaN	85.1662	0.0780062
Dengue / QC	_LNTDIAGLASAIDMSTNYNSDSLHFSNVFR_	P04114	1.64752	1.64752	2.00858e-20	4.43982e-19	84	P04114	APOB	Apolipoprotein B-100	APOB_HUMAN	1	213.295	3.13295	Dengue	QC	NaN	NaN	NaN	63.9181	0.116446
Dengue / QC	_PGQPPKLLIYWASTR_	P06312	0.153459	0.153459	2.07251e-20	4.55801e-19	108	P06312	IGKV4-1	Immunoglobulin kappa variable 4-1	KV401_HUMAN	1	11.2233	1.11223	Dengue	QC	NaN	NaN	NaN	44.5096	0.305661
Dengue / QC	_MVC[Carbamidomethyl (C)]AGYK_	H0YAC1;P03952	1.2759	1.2759	2.25401e-20	4.93465e-19	98	H0YAC1;P03952	KLKB1	Plasma kallikrein (Fragment);Plasma kallikrein	H0YAC1_HUMAN;KLKB1_HUMAN	1	142.15	2.4215	Dengue	QC	NaN	NaN	NaN	88.5494	0.092142
Dengue / QC	_NKYGM[Oxidation (M)]VAQVTQTLK_	P04114	-1.24369	1.24369	2.75875e-20	5.95851e-19	32	P04114	APOB	Apolipoprotein B-100	APOB_HUMAN	1	-57.7708	0.422292	Dengue	QC	NaN	NaN	NaN	24.19	0.207337
Dengue / QC	_KEGGLGPLNIPLLADVTR_	P32119	1.14031	1.14031	3.12031e-20	6.69145e-19	64	P32119	PRDX2	Peroxiredoxin-2	PRDX2_HUMAN	1	120.428	2.20428	Dengue	QC	NaN	NaN	NaN	54.4468	0.0839991
Dengue / QC	_ALTDMPQM[Oxidation (M)]R_	P02671	3.6174	3.6174	3.23041e-20	6.85439e-19	30	P02671	FGA	Fibrinogen alpha chain	FIBA_HUMAN	1	1127.29	12.2729	Dengue	QC	NaN	NaN	NaN	25.3692	0.131631
Dengue / QC	_IAQLPLTGSMSIIFFLPLK_	P36955	0.792168	0.792168	3.32732e-20	7.03524e-19	90	P36955	SERPINF1	Pigment epithelium-derived factor	PEDF_HUMAN	1	73.1675	1.73167	Dengue	QC	NaN	NaN	NaN	77.9122	0.094274
Dengue / QC	_DFHINLFQVLPWLKEKLQDEDLGFL_	B4E1Z4	4.29809	4.29809	3.44762e-20	7.26412e-19	48	B4E1Z4	NaN	cDNA FLJ55673, highly similar to Complement factor B (EC 3.4.21.47)	B4E1Z4_HUMAN	1	1867.23	19.6723	Dengue	QC	NaN	NaN	NaN	36.936	0.215686
Dengue / QC	_EDYLDVYVFGVGPLVNQVNINALASKK_	B4E1Z4	1.59872	1.59872	3.52563e-20	7.4026e-19	76	B4E1Z4	NaN	cDNA FLJ55673, highly similar to Complement factor B (EC 3.4.21.47)	B4E1Z4_HUMAN	1	202.875	3.02875	Dengue	QC	NaN	NaN	NaN	58.0624	0.107843
Dengue / QC	_AVLDVFEEGTEASAATAVKITLLSALVETR_	P01011	1.95365	1.95365	3.62405e-20	7.58283e-19	106	P01011	SERPINA3	Alpha-1-antichymotrypsin	AACT_HUMAN	1	287.354	3.87354	Dengue	QC	NaN	NaN	NaN	96.6599	0.15148
Dengue / QC	_NPDPVAAPWC[Carbamidomethyl (C)]YTTDPSVR_	P08519	1.44277	1.44277	3.66919e-20	7.6507e-19	46	P08519	LPA	Apolipoprotein(a)	APOA_HUMAN	1	171.842	2.71842	Dengue	QC	NaN	NaN	NaN	38.263	0.121141
Dengue / QC	_SLDFTELDVAAEKIDRFMQAVTGWK_	P01019	1.94099	1.94099	3.91769e-20	8.1407e-19	100	P01019	AGT	Angiotensinogen	ANGT_HUMAN	1	283.968	3.83968	Dengue	QC	NaN	NaN	NaN	79.3076	0.140441
Dengue / QC	_MDWLVPATC[Carbamidomethyl (C)]EPIQSVFFFSGDKYYR_	P04004	0.976873	0.976873	4.5433e-20	9.37599e-19	130	P04004	VTN	Vitronectin	VTNC_HUMAN	1	96.8195	1.9682	Dengue	QC	NaN	NaN	NaN	99.0509	0.0843946
Dengue / QC	_NKADYVETVLDSTC[Carbamidomethyl (C)]SSTVQFLEYELNVLGTHK_	P04114	1.25061	1.25061	5.77354e-20	1.1675e-18	92	P04114	APOB	Apolipoprotein B-100	APOB_HUMAN	1	137.943	2.37943	Dengue	QC	NaN	NaN	NaN	81.9716	0.11042
Dengue / QC	_FFESFGDLSTPDAVMGNPK_	P68871	0.538636	0.538636	8.38321e-20	1.66724e-18	170	P68871	HBB	Hemoglobin subunit beta	HBB_HUMAN	1	45.2598	1.4526	Dengue	QC	NaN	NaN	NaN	148.257	0.0541785
Dengue / QC	_ATNYNAGDR_	P61626	1.50113	1.50113	8.64273e-20	1.71319e-18	114	P61626	LYZ	Lysozyme C	LYSC_HUMAN	1	183.065	2.83065	Dengue	QC	NaN	NaN	NaN	104.558	0.133881
Dengue / QC	_TEC[Carbamidomethyl (C)]FITGWGETQGTFGAGLLK_	P00747	0.852573	0.852573	1.07063e-19	2.09467e-18	108	P00747	PLG	Plasminogen	PLMN_HUMAN	1	80.5719	1.80572	Dengue	QC	NaN	NaN	NaN	89.0896	0.0755658
Dengue / QC	_QPNC[Carbamidomethyl (C)]DDPETEEAALVAIDYINQNLPWGYK_	P02765	0.754131	0.754131	1.16701e-19	2.25398e-18	170	P02765	AHSG	Alpha-2-HS-glycoprotein	FETUA_HUMAN	1	68.6615	1.68662	Dengue	QC	NaN	NaN	NaN	90.195	0.0669194
Dengue / QC	_LGEVNTYAGDLQK_	P06727	0.843886	0.843886	1.43756e-19	2.74137e-18	106	P06727	APOA4	Apolipoprotein A-IV	APOA4_HUMAN	1	79.4878	1.79488	Dengue	QC	NaN	NaN	NaN	86.8709	0.0773496
Dengue / QC	_WNPSPPAC[Carbamidomethyl (C)]EPNSC[Carbamidomethyl (C)]INLPDIPHASWETYPRPTKEDVYVVGTVLR_	P04003	1.32547	1.32547	1.48731e-19	2.82731e-18	94	P04003	C4BPA	C4b-binding protein alpha chain	C4BPA_HUMAN	1	150.615	2.50615	Dengue	QC	NaN	NaN	NaN	82.2592	0.0946404
Dengue / QC	_QSNNKYAASSYLSLTPEQWKSHK_	P0DOY3	6.47184	6.47184	1.82949e-19	3.40262e-18	32	P0DOY3	IGLC3	Immunoglobulin lambda constant 3	IGLC3_HUMAN	1	8776.03	88.7603	Dengue	QC	NaN	NaN	NaN	26.5614	0.212608
Dengue / QC	_VGPEADKYR_	P02679;P02679-2	4.49882	4.49882	1.93667e-19	3.59088e-18	118	P02679;P02679-2	FGG	Fibrinogen gamma chain;Isoform Gamma-A of Fibrinogen gamma chain	FIBG_HUMAN	1	2160.89	22.6089	Dengue	QC	NaN	NaN	NaN	84.2766	0.357133
Dengue / QC	_DFHINLFQVLPWLK_	B4E1Z4	0.830331	0.830331	2.09776e-19	3.87671e-18	176	B4E1Z4	NaN	cDNA FLJ55673, highly similar to Complement factor B (EC 3.4.21.47)	B4E1Z4_HUMAN	1	77.8093	1.77809	Dengue	QC	NaN	NaN	NaN	155.322	0.0851877
Dengue / QC	_LNLVATPLFLKPGIPYPIKVQVK_	P01031	1.28539	1.28539	2.10369e-19	3.87671e-18	60	P01031	C5	Complement C5	CO5_HUMAN	1	143.748	2.43748	Dengue	QC	NaN	NaN	NaN	40.6251	0.107915
Dengue / QC	_NNNEKDM[Oxidation (M)]ALTAFVLISLQEAK_	P01024	-0.831925	0.831925	2.23001e-19	4.08452e-18	28	P01024	C3	Complement C3	CO3_HUMAN	1	-43.8221	0.561779	Dengue	QC	NaN	NaN	NaN	18.5801	0.193091
Dengue / QC	_VVAGVANALAHKYH_	P68871	1.27915	1.27915	3.2966e-19	5.92994e-18	52	P68871	HBB	Hemoglobin subunit beta	HBB_HUMAN	1	142.696	2.42696	Dengue	QC	NaN	NaN	NaN	40.4241	0.0881132
Dengue / QC	_EVVTSEDGSDC[Carbamidomethyl (C)]PEAM[Oxidation (M)]DLGTLSGIGTLDGFR_	P02671	1.25226	1.25226	3.62123e-19	6.47523e-18	48	P02671	FGA	Fibrinogen alpha chain	FIBA_HUMAN	1	138.214	2.38214	Dengue	QC	NaN	NaN	NaN	30.9467	0.399943
Dengue / QC	_VVYRQYTDSTFRVPVER_	P00450	4.58994	4.58994	4.20065e-19	7.46699e-18	30	P00450	CP	Ceruloplasmin	CERU_HUMAN	1	2308.3	24.083	Dengue	QC	NaN	NaN	NaN	22.0044	0.138137
Dengue / QC	_QHLPLIK_	P02671	3.70326	3.70326	4.57856e-19	8.06737e-18	32	P02671	FGA	Fibrinogen alpha chain	FIBA_HUMAN	1	1202.55	13.0255	Dengue	QC	NaN	NaN	NaN	23.4933	0.122345
Dengue / QC	_SSTSPTTNVLLSPLSVATALSALSLGAEQRTESIIHR_	P36955	2.05493	2.05493	4.86981e-19	8.53066e-18	70	P36955	SERPINF1	Pigment epithelium-derived factor	PEDF_HUMAN	1	315.525	4.15525	Dengue	QC	NaN	NaN	NaN	41.332	0.175002
Dengue / QC	_HRGVYSSDVFDIFPGTYQTLEM[Oxidation (M)]FPR_	P00450	-0.173063	0.173063	5.23466e-19	9.11678e-18	60	P00450	CP	Ceruloplasmin	CERU_HUMAN	1	-11.3042	0.886958	Dengue	QC	NaN	NaN	NaN	21.1181	0.240676
Dengue / QC	_LREQLGPVTQEFWDNLEK_	P02647	1.1901	1.1901	5.34362e-19	9.27972e-18	82	P02647	APOA1	Apolipoprotein A-I	APOA1_HUMAN	1	128.169	2.28169	Dengue	QC	NaN	NaN	NaN	71.0304	0.0836308
Dengue / QC	_TPENYPNDGLTMNYC[Carbamidomethyl (C)]R_	P08519	2.37844	2.37844	6.78157e-19	1.16096e-17	44	P08519	LPA	Apolipoprotein(a)	APOA_HUMAN	1	419.974	5.19974	Dengue	QC	NaN	NaN	NaN	31.099	0.141467
Dengue / QC	_WC[Carbamidomethyl (C)]AVSEHEATKC[Carbamidomethyl (C)]QSFRDHMK_	P02787	7.86399	7.86399	7.50543e-19	1.27762e-17	30	P02787	TF	Serotransferrin	TRFE_HUMAN	1	23196.9	232.969	Dengue	QC	NaN	NaN	NaN	21.1774	0.234406
Dengue / QC	_SYSC[Carbamidomethyl (C)]QVM[Oxidation (M)]HEGSTVEK_	P15814	1.32155	1.32155	9.15268e-19	1.54062e-17	132	P15814	IGLL1	Immunoglobulin lambda-like polypeptide 1	IGLL1_HUMAN	1	149.935	2.49935	Dengue	QC	NaN	NaN	NaN	58.3576	0.21023
Dengue / QC	_FYYLIASETPGK_	P29622	0.410991	0.410991	9.33217e-19	1.56645e-17	64	P29622	SERPINA4	Kallistatin	KAIN_HUMAN	1	32.9599	1.3296	Dengue	QC	NaN	NaN	NaN	50.2268	0.0744292
Dengue / QC	_DTWVEHWPEEDEC[Carbamidomethyl (C)]QDEENQKQC[Carbamidomethyl (C)]QDLGAFTESMVVFGC[Carbamidomethyl (C)]PN_	P01024	1.36198	1.36198	1.02269e-18	1.69772e-17	144	P01024	C3	Complement C3	CO3_HUMAN	1	157.037	2.57037	Dengue	QC	NaN	NaN	NaN	51.7827	0.109743
Dengue / QC	_IDTINLFPATLFDAYMVAQNPGEWMLSC[Carbamidomethyl (C)]QNLNHLK_	P00450	0.837014	0.837014	1.06504e-18	1.76052e-17	114	P00450	CP	Ceruloplasmin	CERU_HUMAN	1	78.635	1.78635	Dengue	QC	NaN	NaN	NaN	104.374	0.0986487
Dengue / QC	_GISTSAASPAVGTVGMDMDEDDDFSKWNFYYSPQSSPDKK_	P04114	1.24711	1.24711	1.19007e-18	1.94873e-17	114	P04114	APOB	Apolipoprotein B-100	APOB_HUMAN	1	137.365	2.37365	Dengue	QC	NaN	NaN	NaN	108.365	0.127992
Dengue / QC	_ATLVC[Carbamidomethyl (C)]LISDFYPGAVTVAWK_	P0DOY2	1.11655	1.11655	1.35424e-18	2.19372e-17	176	P0DOY2	IGLC2	Immunoglobulin lambda constant 2	IGLC2_HUMAN	1	116.828	2.16828	Dengue	QC	NaN	NaN	NaN	126.374	0.0990796
Dengue / QC	_LREQLGPVTQEFWDNLEKETEGLR_	P02647	1.852	1.852	1.41485e-18	2.28577e-17	42	P02647	APOA1	Apolipoprotein A-I	APOA1_HUMAN	1	261	3.61	Dengue	QC	NaN	NaN	NaN	36.6793	0.11709
Dengue / QC	_SFAAGIQALGGTNINDAMLMAVQLLDSSNQEER_	Q14624	1.34902	1.34902	2.4948e-18	3.94585e-17	138	Q14624	ITIH4	Inter-alpha-trypsin inhibitor heavy chain H4	ITIH4_HUMAN	1	154.738	2.54738	Dengue	QC	NaN	NaN	NaN	40.9004	0.0872941
Dengue / QC	_AYIFIDEAHITQALIWLSQR_	P01023	0.963964	0.963964	3.15662e-18	4.91519e-17	98	P01023	A2M	Alpha-2-macroglobulin	A2MG_HUMAN	1	95.0663	1.95066	Dengue	QC	NaN	NaN	NaN	87.0107	0.103303
Dengue / QC	_DQYYNIDVPSR_	Q92954-3	1.04273	1.04273	3.72901e-18	5.77661e-17	80	Q92954-3	PRG4	Isoform C of Proteoglycan 4	PRG4_HUMAN	1	106.012	2.06012	Dengue	QC	NaN	NaN	NaN	46.5406	0.0993581
Dengue / QC	_HLIVTPSGC[Carbamidomethyl (C)]GEQNMIGMTPTVIAVHYLDETEQWEKFGLEK_	P01024	0.795499	0.795499	3.85056e-18	5.94961e-17	134	P01024	C3	Complement C3	CO3_HUMAN	1	73.5678	1.73568	Dengue	QC	NaN	NaN	NaN	103.592	0.0967153
Dengue / QC	_SPAGPTVVSIGGGK_	P09172	1.63087	1.63087	4.82396e-18	7.3407e-17	48	P09172	DBH	Dopamine beta-hydroxylase	DOPO_HUMAN	1	209.7	3.097	Dengue	QC	NaN	NaN	NaN	41.5272	0.101756
Dengue / QC	_DPDQTDGLGLSYLSSHIANVER_	P06396	1.39376	1.39376	5.06744e-18	7.69178e-17	66	P06396	GSN	Gelsolin	GELS_HUMAN	1	162.763	2.62763	Dengue	QC	NaN	NaN	NaN	52.0699	0.10552
Dengue / QC	_C[Carbamidomethyl (C)]QHEMDQYWGIGSLASGINLFTNSFEGPVLDHR_	P07358	0.804907	0.804907	5.46232e-18	8.2496e-17	108	P07358	C8B	Complement component C8 beta chain	CO8B_HUMAN	1	74.7033	1.74703	Dengue	QC	NaN	NaN	NaN	84.1293	0.093646
Dengue / QC	_ILLMDLNEEDPTVLELGITGSK_	P27169	0.830742	0.830742	7.04106e-18	1.04249e-16	176	P27169	PON1	Serum paraoxonase/arylesterase 1	PON1_HUMAN	1	77.8599	1.7786	Dengue	QC	NaN	NaN	NaN	106.444	0.0709223
Dengue / QC	_SLGNVIMVC[Carbamidomethyl (C)]R_	P08603	0.820939	0.820939	7.18161e-18	1.0607e-16	140	P08603	CFH	Complement factor H	CFAH_HUMAN	1	76.6555	1.76656	Dengue	QC	NaN	NaN	NaN	119.437	0.0784127
Dengue / QC	_LGREGVQKEDIPPADLSDQVPDTESETR_	P01024	2.71691	2.71691	8.7046e-18	1.27625e-16	104	P01024	C3	Complement C3	CO3_HUMAN	1	557.464	6.57464	Dengue	QC	NaN	NaN	NaN	74.5929	0.242404
Dengue / QC	_GSGFFVFSR_	A0A286YES5;P01854	2.31916	2.31916	8.96758e-18	1.30985e-16	40	A0A286YES5;P01854	IGHE	Immunoglobulin heavy constant epsilon (Fragment);Immunoglobulin heavy constant epsilon	A0A286YES5_HUMAN;IGHE_HUMAN	1	399.042	4.99042	Dengue	QC	NaN	NaN	NaN	33.3547	0.203588
Dengue / QC	_VGDRNTEQEEGGEAVHEVEVVIK_	P00742	1.0989	1.0989	9.02282e-18	1.31332e-16	72	P00742	F10	Coagulation factor X	FA10_HUMAN	1	114.192	2.14192	Dengue	QC	NaN	NaN	NaN	59.0197	0.0889985
Dengue / QC	_QLEQVIAK_	P02671	4.16192	4.16192	1.03726e-17	1.49893e-16	84	P02671	FGA	Fibrinogen alpha chain	FIBA_HUMAN	1	1690.04	17.9004	Dengue	QC	NaN	NaN	NaN	56.9609	0.313901
Dengue / QC	_TVAAC[Carbamidomethyl (C)]NLPIVRGPC[Carbamidomethyl (C)]R_	P02760	3.72063	3.72063	1.06853e-17	1.53674e-16	30	P02760	AMBP	Protein AMBP	AMBP_HUMAN	1	1218.33	13.1833	Dengue	QC	NaN	NaN	NaN	22.0232	0.141935
Dengue / QC	_AFWLDVSHNR_	P35858;P35858-2	1.14463	1.14463	1.11096e-17	1.59384e-16	52	P35858;P35858-2	IGFALS	Insulin-like growth factor-binding protein complex acid labile subunit;Isoform 2 of Insulin-like growth factor-binding protein complex acid labile subunit	ALS_HUMAN	1	121.089	2.21089	Dengue	QC	NaN	NaN	NaN	44.5856	0.100776
Dengue / QC	_C[Carbamidomethyl (C)]AEENC[Carbamidomethyl (C)]FIQKSDDKVTLEER_	P01024	3.2547	3.2547	1.28311e-17	1.81077e-16	42	P01024	C3	Complement C3	CO3_HUMAN	1	854.469	9.54469	Dengue	QC	NaN	NaN	NaN	35.582	0.203235
Dengue / QC	_WQQGNIFSC[Carbamidomethyl (C)]SVMHEALHNRFTQK_	P01860	1.68721	1.68721	1.29084e-17	1.81744e-16	96	P01860	IGHG3	Immunoglobulin heavy constant gamma 3	IGHG3_HUMAN	1	222.032	3.22032	Dengue	QC	NaN	NaN	NaN	73.9468	0.140562
Dengue / QC	_LVSANRLFGDK_	P01008	2.88015	2.88015	1.42273e-17	1.99845e-16	42	P01008	SERPINC1	Antithrombin-III	ANT3_HUMAN	1	636.227	7.36227	Dengue	QC	NaN	NaN	NaN	36.4443	0.179197
Dengue / QC	_IFFPGVSEFGK_	F8WF14;P06276	0.835819	0.835819	1.63435e-17	2.27977e-16	72	F8WF14;P06276	BCHE	Carboxylic ester hydrolase;Cholinesterase	F8WF14_HUMAN;CHLE_HUMAN	1	78.487	1.78487	Dengue	QC	NaN	NaN	NaN	64.6584	0.0928247
Dengue / QC	_NIPGDFEC[Carbamidomethyl (C)]EC[Carbamidomethyl (C)]PEGYRYNLK_	P07225	2.31932	2.31932	1.72863e-17	2.40223e-16	68	P07225	PROS1	Vitamin K-dependent protein S	PROS_HUMAN	1	399.097	4.99097	Dengue	QC	NaN	NaN	NaN	58.5894	0.190463
Dengue / QC	_GLRQGYFVEAQPK_	P02743	3.91916	3.91916	2.20886e-17	3.03895e-16	36	P02743	APCS	Serum amyloid P-component	SAMP_HUMAN	1	1412.81	15.1281	Dengue	QC	NaN	NaN	NaN	26.4627	0.204408
Dengue / QC	_LTVSIEAR_	P22792	0.618472	0.618472	2.39086e-17	3.26696e-16	156	P22792	CPN2	Carboxypeptidase N subunit 2	CPN2_HUMAN	1	53.5248	1.53525	Dengue	QC	NaN	NaN	NaN	126.931	0.0680106
Dengue / QC	_NPSDPMPQAPALWIETTAYALLHLLLHEGK_	P0C0L5	1.33747	1.33747	2.73047e-17	3.70582e-16	36	P0C0L5	C4B	Complement C4-B	CO4B_HUMAN	1	152.708	2.52708	Dengue	QC	NaN	NaN	NaN	29.9897	0.124823
Dengue / QC	_NPSSAGSWNSGSSGPGSTGNR_	P02671	1.94725	1.94725	2.86898e-17	3.86767e-16	82	P02671	FGA	Fibrinogen alpha chain	FIBA_HUMAN	1	285.64	3.8564	Dengue	QC	NaN	NaN	NaN	76.1439	0.184406
Dengue / QC	_HQSAC[Carbamidomethyl (C)]KDSDWPFC[Carbamidomethyl (C)]SDEDWNYK_	P02671	2.78812	2.78812	3.09711e-17	4.16589e-16	50	P02671	FGA	Fibrinogen alpha chain	FIBA_HUMAN	1	590.728	6.90728	Dengue	QC	NaN	NaN	NaN	40.95	0.194328
Dengue / QC	_YTIAALLSPYSYSTTAVVTNPK_	P02766	0.90463	0.90463	3.28198e-17	4.39494e-16	88	P02766	TTR	Transthyretin	TTHY_HUMAN	1	87.2064	1.87206	Dengue	QC	NaN	NaN	NaN	46.491	0.0708672
Dengue / QC	_VETNM[Oxidation (M)]AFSPFSIASLLTQVLLGAGENTK_	P05155;P05155-3	0.764286	0.764286	3.38795e-17	4.52678e-16	96	P05155;P05155-3	SERPING1	Plasma protease C1 inhibitor;Isoform 3 of Plasma protease C1 inhibitor	IC1_HUMAN	1	69.8529	1.69853	Dengue	QC	NaN	NaN	NaN	52.3626	0.193547
Dengue / QC	_GFLLLASLR_	P07996	1.40511	1.40511	3.51436e-17	4.67496e-16	88	P07996	THBS1	Thrombospondin-1	TSP1_HUMAN	1	164.837	2.64837	Dengue	QC	NaN	NaN	NaN	58.0038	0.147084
Dengue / QC	_SLPMDHPDSSQHGPPFEGQSQVQPPPSQEATPLQQEK_	Q16610	1.68903	1.68903	3.6824e-17	4.86626e-16	86	Q16610	ECM1	Extracellular matrix protein 1	ECM1_HUMAN	1	222.44	3.2244	Dengue	QC	NaN	NaN	NaN	73.7522	0.139813
Dengue / QC	_FRIEDGFSLKEQLQDMGLVDLFSPEK_	P01008	1.69386	1.69386	3.80605e-17	5.01865e-16	134	P01008	SERPINC1	Antithrombin-III	ANT3_HUMAN	1	223.521	3.23521	Dengue	QC	NaN	NaN	NaN	96.8544	0.156519
Dengue / QC	_ATLDVDEAGTEAAAATSFAIK_	P29622	0.695209	0.695209	4.26351e-17	5.58519e-16	132	P29622	SERPINA4	Kallistatin	KAIN_HUMAN	1	61.9119	1.61912	Dengue	QC	NaN	NaN	NaN	96.1055	0.0789669
Dengue / QC	_ADDKETC[Carbamidomethyl (C)]FAEEPTMR_	A0A0C4DGB6	1.40316	1.40316	4.28643e-17	5.60304e-16	82	A0A0C4DGB6	ALB	Serum albumin	A0A0C4DGB6_HUMAN	1	164.48	2.6448	Dengue	QC	NaN	NaN	NaN	56.0693	0.103965
Dengue / QC	_SLLSNVEGDNAVPMQHNNRPTQPLK_	P00915	0.628422	0.628422	4.53013e-17	5.89602e-16	54	P00915	CA1	Carbonic anhydrase 1	CAH1_HUMAN	1	54.5873	1.54587	Dengue	QC	NaN	NaN	NaN	49.2554	0.0518306
Dengue / QC	_MSSINADFAFNLYR_	P05543	1.94996	1.94996	4.55906e-17	5.92088e-16	44	P05543	SERPINA7	Thyroxine-binding globulin	THBG_HUMAN	1	286.365	3.86365	Dengue	QC	NaN	NaN	NaN	36.6423	0.143708
Dengue / QC	_SDFASNC[Carbamidomethyl (C)]C[Carbamidomethyl (C)]SINSPPLYC[Carbamidomethyl (C)]DSEIDAELKNIL_	P02774;P02774-3	0.883221	0.883221	4.75144e-17	6.15746e-16	172	P02774;P02774-3	GC	Vitamin D-binding protein;Isoform 3 of Vitamin D-binding protein	VTDB_HUMAN	1	84.4488	1.84449	Dengue	QC	NaN	NaN	NaN	117.771	0.0974521
Dengue / QC	_ALTDM[Oxidation (M)]PQMR_	P02671	3.07122	3.07122	5.01536e-17	6.45781e-16	38	P02671	FGA	Fibrinogen alpha chain	FIBA_HUMAN	1	740.483	8.40483	Dengue	QC	NaN	NaN	NaN	30.3254	0.168953
Dengue / QC	_HYLM[Oxidation (M)]WGLSSDFWGEKPNLSYIIGK_	P01024	1.0245	1.0245	5.35065e-17	6.86022e-16	118	P01024	C3	Complement C3	CO3_HUMAN	1	103.425	2.03425	Dengue	QC	NaN	NaN	NaN	93.0742	0.096826
Dengue / QC	_DYFPEPVTVSWNSGALTSGVHTFPAVLQSSGLYSLSSVVTVPSSSLGTK_	P01861	0.959398	0.959398	5.45582e-17	6.98021e-16	170	P01861	IGHG4	Immunoglobulin heavy constant gamma 4	IGHG4_HUMAN	1	94.4498	1.9445	Dengue	QC	NaN	NaN	NaN	150.234	0.0993488
Dengue / QC	_FSGTWYAMAKK_	P02753;Q5VY30	2.4391	2.4391	5.72653e-17	7.31103e-16	56	P02753;Q5VY30	RBP4	Retinol-binding protein 4;Retinol binding protein 4, plasma, isoform CRA_b	RET4_HUMAN;Q5VY30_HUMAN	1	442.303	5.42303	Dengue	QC	NaN	NaN	NaN	46.1307	0.157741
Dengue / QC	_AAPSVTLFPPSSEELQANKATLVC[Carbamidomethyl (C)]LISDFYPGAVTVAWKADSSPVK_	P0DOY2	2.51676	2.51676	6.20045e-17	7.86609e-16	120	P0DOY2	IGLC2	Immunoglobulin lambda constant 2	IGLC2_HUMAN	1	472.296	5.72296	Dengue	QC	NaN	NaN	NaN	84.0331	0.24538
Dengue / QC	_TPENYPNAGLTENYC[Carbamidomethyl (C)]R_	P08519	1.95333	1.95333	6.34551e-17	8.0332e-16	52	P08519	LPA	Apolipoprotein(a)	APOA_HUMAN	1	287.268	3.87268	Dengue	QC	NaN	NaN	NaN	34.4256	0.15811
Dengue / QC	_AVHKAVLTIDEK_	P01009	3.09767	3.09767	6.9368e-17	8.76334e-16	46	P01009	SERPINA1	Alpha-1-antitrypsin	A1AT_HUMAN	1	756.032	8.56032	Dengue	QC	NaN	NaN	NaN	39.0512	0.228385
Dengue / QC	_GM[Oxidation (M)]TRPLSTLISSSQSC[Carbamidomethyl (C)]QYTLDAK_	P04114	1.10952	1.10952	8.03166e-17	1.00412e-15	40	P04114	APOB	Apolipoprotein B-100	APOB_HUMAN	1	115.774	2.15774	Dengue	QC	NaN	NaN	NaN	34.5851	0.0611003
Dengue / QC	_VSNQTLSLFFTVLQDVPVR_	P01023	1.01268	1.01268	8.21028e-17	1.02011e-15	78	P01023	A2M	Alpha-2-macroglobulin	A2MG_HUMAN	1	101.766	2.01766	Dengue	QC	NaN	NaN	NaN	64.2931	0.108931
Dengue / QC	_DAHLTWEVAGK_	A0A0A0MS09;P01880;P01880-2	1.24733	1.24733	8.38822e-17	1.03581e-15	20	A0A0A0MS09;P01880;P01880-2	IGHD	Immunoglobulin heavy constant delta (Fragment);Immunoglobulin heavy constant delta;Isoform 2 of Immunoglobulin heavy constant delta	A0A0A0MS09_HUMAN;IGHD_HUMAN;IGHD_HUMAN	1	137.402	2.37402	Dengue	QC	NaN	NaN	NaN	12.268	0.125657
Dengue / QC	_FGSSLITVR_	P80108	0.568046	0.568046	8.55099e-17	1.05375e-15	164	P80108	GPLD1	Phosphatidylinositol-glycan-specific phospholipase D	PHLD_HUMAN	1	48.2514	1.48251	Dengue	QC	NaN	NaN	NaN	112.921	0.0578041
Dengue / QC	_TAGYGINILGMDPLSTPFDNEFYNGLC[Carbamidomethyl (C)]NR_	P02748	0.830992	0.830992	9.32699e-17	1.14005e-15	168	P02748	C9	Complement component C9	CO9_HUMAN	1	77.8908	1.77891	Dengue	QC	NaN	NaN	NaN	111.179	0.0848128
Dengue / QC	_EVDLKDYEDQQK_	P02671	3.43453	3.43453	9.45424e-17	1.15326e-15	88	P02671	FGA	Fibrinogen alpha chain	FIBA_HUMAN	1	981.178	10.8118	Dengue	QC	NaN	NaN	NaN	63.7083	0.277209
Dengue / QC	_QTVNLQLQPYSLVTTLNSDLK_	P04114	1.07169	1.07169	9.73277e-17	1.18245e-15	126	P04114	APOB	Apolipoprotein B-100	APOB_HUMAN	1	110.19	2.1019	Dengue	QC	NaN	NaN	NaN	93.8767	0.0892962
Dengue / QC	_VTIM[Oxidation (M)]WTPPESAVTGYRVDVIPVNLPGEHGQR_	P02751;P02751-15;P02751-3;P02751-7	0.165023	0.165023	9.97444e-17	1.20938e-15	48	P02751;P02751-15;P02751-3;P02751-7	FN1	Fibronectin;Isoform 15 of Fibronectin;Isoform 3 of Fibronectin;Isoform 7 of Fibronectin	FINC_HUMAN	1	12.1184	1.12118	Dengue	QC	NaN	NaN	NaN	29.7831	0.217753
Dengue / QC	_QFTSSTSYNRGDSTFESKSYK_	P02671	3.0491	3.0491	1.07498e-16	1.30076e-15	30	P02671	FGA	Fibrinogen alpha chain	FIBA_HUMAN	1	727.695	8.27695	Dengue	QC	NaN	NaN	NaN	22.2483	0.130443
Dengue / QC	_A[Acetyl (Protein N-term)]SPDWGYDDKNGPEQWSK_	P00915	2.15237	2.15237	1.24281e-16	1.49484e-15	74	P00915	CA1	Carbonic anhydrase 1	CAH1_HUMAN	1	344.559	4.44559	Dengue	QC	NaN	NaN	NaN	61.2781	0.185665
Dengue / QC	_DC[Carbamidomethyl (C)]QDIANKGAK_	P02679;P02679-2	7.15614	7.15614	1.4377e-16	1.71556e-15	28	P02679;P02679-2	FGG	Fibrinogen gamma chain;Isoform Gamma-A of Fibrinogen gamma chain	FIBG_HUMAN	1	14163	142.63	Dengue	QC	NaN	NaN	NaN	19.6081	0.216957
Dengue / QC	_QGFGNVATNTDGKNYC[Carbamidomethyl (C)]GLPGEYWLGNDK_	P02675	2.92688	2.92688	1.50952e-16	1.79063e-15	32	P02675	FGB	Fibrinogen beta chain	FIBB_HUMAN	1	660.466	7.60466	Dengue	QC	NaN	NaN	NaN	25.8906	0.151586
Dengue / QC	_VVAEGFDFANGINISPDGK_	P27169	1.0151	1.0151	1.56395e-16	1.84791e-15	62	P27169	PON1	Serum paraoxonase/arylesterase 1	PON1_HUMAN	1	102.104	2.02104	Dengue	QC	NaN	NaN	NaN	50.4059	0.0880269
Dengue / QC	_C[Carbamidomethyl (C)]TLKPC[Carbamidomethyl (C)]DYPDIKHGGLYHENMR_	P08603	3.45152	3.45152	1.59904e-16	1.882e-15	48	P08603	CFH	Complement factor H	CFAH_HUMAN	1	993.987	10.9399	Dengue	QC	NaN	NaN	NaN	39.266	0.230091
Dengue / QC	_DC[Carbamidomethyl (C)]SLPYATESKEC[Carbamidomethyl (C)]R_	P23142	2.96628	2.96628	1.75918e-16	2.05714e-15	82	P23142	FBLN1	Fibulin-1	FBLN1_HUMAN	1	681.516	7.81516	Dengue	QC	NaN	NaN	NaN	61.7577	0.243191
Dengue / QC	_LTVDKSRWQQGNIFSC[Carbamidomethyl (C)]SVMHEALHNR_	P01860	0.125347	0.125347	1.79466e-16	2.08922e-15	126	P01860	IGHG3	Immunoglobulin heavy constant gamma 3	IGHG3_HUMAN	1	9.07697	1.09077	Dengue	QC	NaN	NaN	NaN	49.4881	0.59528
Dengue / QC	_TFSEWLESVKENPAVIDFELAPIVDLVR_	P13671	1.30177	1.30177	2.20644e-16	2.53741e-15	90	P13671	C6	Complement component C6	CO6_HUMAN	1	146.531	2.46531	Dengue	QC	NaN	NaN	NaN	69.9086	0.130011
Dengue / QC	_MYYSAVEPTKDIFTGLIGPMK_	E9PFZ2	1.4588	1.4588	2.42873e-16	2.77713e-15	106	E9PFZ2	CP	Ceruloplasmin	E9PFZ2_HUMAN	1	174.879	2.74879	Dengue	QC	NaN	NaN	NaN	66.1906	0.135479
Dengue / QC	_LTIGEGQQHHLGGAK_	P02679;P02679-2	7.67193	7.67193	2.52217e-16	2.87852e-15	32	P02679;P02679-2	FGG	Fibrinogen gamma chain;Isoform Gamma-A of Fibrinogen gamma chain	FIBG_HUMAN	1	20292.9	203.929	Dengue	QC	NaN	NaN	NaN	23.0868	0.31492
Dengue / QC	_NQFSLQLNSVTPEDTAVYYC[Carbamidomethyl (C)]AR_	A0A0B4J1U7	1.59663	1.59663	2.67627e-16	3.04287e-15	36	A0A0B4J1U7	IGHV6-1	Immunoglobulin heavy variable 6-1	HV601_HUMAN	1	202.435	3.02435	Dengue	QC	NaN	NaN	NaN	28.489	0.119432
Dengue / QC	_EGKEYGVVLAPDGSTVAVEPLLAGLEAGLQGR_	Q96PD5	0.966866	0.966866	2.76438e-16	3.12536e-15	174	Q96PD5	PGLYRP2	N-acetylmuramoyl-L-alanine amidase	PGRP2_HUMAN	1	95.459	1.95459	Dengue	QC	NaN	NaN	NaN	168.42	0.103681
Dengue / QC	_VQLSNDFDEYIM[Oxidation (M)]AIEQTIKSGSDEVQVGQQR_	P01024	2.6128	2.6128	2.79521e-16	3.1484e-15	36	P01024	C3	Complement C3	CO3_HUMAN	1	511.692	6.11692	Dengue	QC	NaN	NaN	NaN	20.9261	0.425241
Dengue / QC	_HDTSLKPISVSYNPATAK_	P00915	0.939038	0.939038	3.13674e-16	3.50037e-15	68	P00915	CA1	Carbonic anhydrase 1	CAH1_HUMAN	1	91.7249	1.91725	Dengue	QC	NaN	NaN	NaN	57.1162	0.0753394
Dengue / QC	_EYGVVLAPDGSTVAVEPLLAGLEAGLQGR_	Q96PD5	0.803607	0.803607	3.31331e-16	3.66349e-15	172	Q96PD5	PGLYRP2	N-acetylmuramoyl-L-alanine amidase	PGRP2_HUMAN	1	74.5459	1.74546	Dengue	QC	NaN	NaN	NaN	122.296	0.0774043
Dengue / QC	_QSNNKYAASSYLSLTPEQWR_	P15814	1.95702	1.95702	3.43305e-16	3.78894e-15	90	P15814	IGLL1	Immunoglobulin lambda-like polypeptide 1	IGLL1_HUMAN	1	288.26	3.8826	Dengue	QC	NaN	NaN	NaN	78.0481	0.169413
Dengue / QC	_GLQDEDGYRMK_	P0C0L5	4.27024	4.27024	3.51748e-16	3.87502e-15	62	P0C0L5	C4B	Complement C4-B	CO4B_HUMAN	1	1829.62	19.2962	Dengue	QC	NaN	NaN	NaN	36.0757	0.336783
Dengue / QC	_HRQIVVDKYYQENFC[Carbamidomethyl (C)]EQIC[Carbamidomethyl (C)]SK_	P13671	2.44877	2.44877	3.75204e-16	4.11836e-15	44	P13671	C6	Complement component C6	CO6_HUMAN	1	445.95	5.4595	Dengue	QC	NaN	NaN	NaN	38.4816	0.189802
Dengue / QC	_TLNLAQNLLAQLPEELFHPLTSLQTLK_	P22792	0.939875	0.939875	4.04963e-16	4.42887e-15	82	P22792	CPN2	Carboxypeptidase N subunit 2	CPN2_HUMAN	1	91.8361	1.91836	Dengue	QC	NaN	NaN	NaN	76.4977	0.0991021
Dengue / QC	_APVGHFYEPQAPSAEVEMTSYVLLAYLTAQPAPTSEDLTSATNIVK_	P01023	0.908143	0.908143	4.94775e-16	5.38179e-15	152	P01023	A2M	Alpha-2-macroglobulin	A2MG_HUMAN	1	87.6628	1.87663	Dengue	QC	NaN	NaN	NaN	133.012	0.102396
Dengue / QC	_DSYYM[Oxidation (M)]TSSQLSTPLQQWR_	A0A0A0MS09;P01880;P01880-2	0.971901	0.971901	5.87463e-16	6.34004e-15	28	A0A0A0MS09;P01880;P01880-2	IGHD	Immunoglobulin heavy constant delta (Fragment);Immunoglobulin heavy constant delta;Isoform 2 of Immunoglobulin heavy constant delta	A0A0A0MS09_HUMAN;IGHD_HUMAN;IGHD_HUMAN	1	96.1424	1.96142	Dengue	QC	NaN	NaN	NaN	19.3842	0.270747
Dengue / QC	_KGGETSEM[Oxidation (M)]YLIQPDSSVKPYR_	P02675	2.22462	2.22462	6.38329e-16	6.85315e-15	54	P02675	FGB	Fibrinogen beta chain	FIBB_HUMAN	1	367.387	4.67387	Dengue	QC	NaN	NaN	NaN	43.3256	0.191467
Dengue / QC	_GTFATLSELHC[Carbamidomethyl (C)]DKLHVDPENFR_	P68871	1.66119	1.66119	6.61211e-16	7.06464e-15	26	P68871	HBB	Hemoglobin subunit beta	HBB_HUMAN	1	216.277	3.16277	Dengue	QC	NaN	NaN	NaN	20.7206	0.0681107
Dengue / QC	_ALPAPIEKTISK_	P01857	7.11613	7.11613	6.77429e-16	7.21235e-15	32	P01857	IGHG1	Immunoglobulin heavy constant gamma 1	IGHG1_HUMAN	1	13773	138.73	Dengue	QC	NaN	NaN	NaN	23.9947	0.390922
Dengue / QC	_GRFPLYNLGFGHNVDFNFLEVMSMENNGR_	P19827	1.352	1.352	7.13764e-16	7.57243e-15	56	P19827	ITIH1	Inter-alpha-trypsin inhibitor heavy chain H1	ITIH1_HUMAN	1	155.266	2.55266	Dengue	QC	NaN	NaN	NaN	37.952	0.151392
Dengue / QC	_EYVLPSFEVIVEPTEKFYYIYNEK_	P01024	1.09215	1.09215	7.29659e-16	7.72746e-15	148	P01024	C3	Complement C3	CO3_HUMAN	1	113.192	2.13192	Dengue	QC	NaN	NaN	NaN	95.8348	0.107501
Dengue / QC	_VQLSNDFDEYIMAIEQTIKSGSDEVQVGQQR_	P01024	3.49353	3.49353	7.61897e-16	8.04062e-15	78	P01024	C3	Complement C3	CO3_HUMAN	1	1026.31	11.2631	Dengue	QC	NaN	NaN	NaN	49.5497	0.316664
Dengue / QC	_LYSVSYLLK_	P21333;P21333-2;Q5HY54	1.06022	1.06022	7.66834e-16	8.07857e-15	68	P21333;P21333-2;Q5HY54	FLNA	Filamin-A;Isoform 2 of Filamin-A;Filamin-A	FLNA_HUMAN;FLNA_HUMAN;Q5HY54_HUMAN	1	108.526	2.08526	Dengue	QC	NaN	NaN	NaN	62.2858	0.110633
Dengue / QC	_KMTVTDQVNC[Carbamidomethyl (C)]PKLS_	P05090	3.23845	3.23845	7.98022e-16	8.39246e-15	32	P05090	APOD	Apolipoprotein D	APOD_HUMAN	1	843.78	9.4378	Dengue	QC	NaN	NaN	NaN	23.359	0.169063
Dengue / QC	_SRWQQGNIFSC[Carbamidomethyl (C)]SVMHEALHNRFTQK_	P01860	1.99197	1.99197	8.16322e-16	8.56996e-15	104	P01860	IGHG3	Immunoglobulin heavy constant gamma 3	IGHG3_HUMAN	1	297.78	3.9778	Dengue	QC	NaN	NaN	NaN	84.6727	0.154153
Dengue / QC	_VVAGVANALAHK_	P68871	2.25098	2.25098	8.8102e-16	9.23308e-15	22	P68871	HBB	Hemoglobin subunit beta	HBB_HUMAN	1	376.006	4.76006	Dengue	QC	NaN	NaN	NaN	16.4359	0.0767895
Dengue / QC	_GIVAAFYSGPSLSDKEK_	P80108	1.32408	1.32408	9.04152e-16	9.44267e-15	66	P80108	GPLD1	Phosphatidylinositol-glycan-specific phospholipase D	PHLD_HUMAN	1	150.373	2.50373	Dengue	QC	NaN	NaN	NaN	54.2042	0.0999515
Dengue / QC	_QMPGKGLEWMGR_	A0A0J9YXX1	0.731088	0.731088	1.27333e-15	1.3184e-14	46	A0A0J9YXX1	IGHV5-10-1	Immunoglobulin heavy variable 5-10-1	HV5X1_HUMAN	1	65.9891	1.65989	Dengue	QC	NaN	NaN	NaN	37.8259	0.0612063
Dengue / QC	_IYLQPGRLAK_	P19823	3.7486	3.7486	1.4953e-15	1.53766e-14	48	P19823	ITIH2	Inter-alpha-trypsin inhibitor heavy chain H2	ITIH2_HUMAN	1	1244.13	13.4413	Dengue	QC	NaN	NaN	NaN	38.67	0.23127
Dengue / QC	_EQQALQTVC[Carbamidomethyl (C)]LK_	E9PHK0;P05452	0.887506	0.887506	1.50429e-15	1.54427e-14	62	E9PHK0;P05452	CLEC3B	Tetranectin	E9PHK0_HUMAN;TETN_HUMAN	1	84.9975	1.84997	Dengue	QC	NaN	NaN	NaN	42.239	0.106058
Dengue / QC	_AKGQPREPQVYTLPPSQEEMTK_	P01861	1.17736	1.17736	1.65572e-15	1.69683e-14	160	P01861	IGHG4	Immunoglobulin heavy constant gamma 4	IGHG4_HUMAN	1	126.162	2.26162	Dengue	QC	NaN	NaN	NaN	139.849	0.116099
Dengue / QC	_EVYM[Oxidation (M)]PSSIFQDDFVIPDISEPGTWK_	P0C0L5	1.26925	1.26925	1.69107e-15	1.73012e-14	170	P0C0L5	C4B	Complement C4-B	CO4B_HUMAN	1	141.036	2.41036	Dengue	QC	NaN	NaN	NaN	145.771	0.110022
Dengue / QC	_VTEENKELANELR_	P07996	1.78111	1.78111	1.8117e-15	1.85039e-14	40	P07996	THBS1	Thrombospondin-1	TSP1_HUMAN	1	243.69	3.4369	Dengue	QC	NaN	NaN	NaN	21.4481	0.0919468
Dengue / QC	_SMGGKEDLIWELLNQAQEHFGKDK_	P02787	0.784401	0.784401	1.85216e-15	1.88852e-14	176	P02787	TF	Serotransferrin	TRFE_HUMAN	1	72.2378	1.72238	Dengue	QC	NaN	NaN	NaN	170.021	0.0940293
Dengue / QC	_GGETAQSADPQWEQLNNK_	P05546	0.696606	0.696606	2.01832e-15	2.04755e-14	110	P05546	SERPIND1	Heparin cofactor 2	HEP2_HUMAN	1	62.0687	1.62069	Dengue	QC	NaN	NaN	NaN	66.5313	0.0725324
Dengue / QC	_HYDGSYSTFGERYGR_	P01023	4.02342	4.02342	2.19877e-15	2.22312e-14	54	P01023	A2M	Alpha-2-macroglobulin	A2MG_HUMAN	1	1526.19	16.2619	Dengue	QC	NaN	NaN	NaN	40.2578	0.271372
Dengue / QC	_NPDAEIRPWC[Carbamidomethyl (C)]YTMDPSVR_	P08519	1.04828	1.04828	2.34853e-15	2.3587e-14	78	P08519	LPA	Apolipoprotein(a)	APOA_HUMAN	1	106.806	2.06806	Dengue	QC	NaN	NaN	NaN	73.0905	0.0959302
Dengue / QC	_RAPYPNYDRDILTIDIGR_	Q16610	0.869118	0.869118	2.4695e-15	2.47196e-14	108	Q16610	ECM1	Extracellular matrix protein 1	ECM1_HUMAN	1	82.6546	1.82655	Dengue	QC	NaN	NaN	NaN	67.6873	0.0920677
Dengue / QC	_KC[Carbamidomethyl (C)]YFPYLENGYNQNHGR_	Q5TFM2	1.16213	1.16213	2.50816e-15	2.5065e-14	62	Q5TFM2	CFH	Complement factor H	Q5TFM2_HUMAN	1	123.788	2.23788	Dengue	QC	NaN	NaN	NaN	55.0243	0.106729
Dengue / QC	_KLVPFATELHER_	P06727	0.870839	0.870839	2.72624e-15	2.71543e-14	116	P06727	APOA4	Apolipoprotein A-IV	APOA4_HUMAN	1	82.8726	1.82873	Dengue	QC	NaN	NaN	NaN	110.602	0.084223
Dengue / QC	_VREYYFAEAQIADFSDPAFISK_	P05546	0.510459	0.510459	2.79006e-15	2.76983e-14	136	P05546	SERPIND1	Heparin cofactor 2	HEP2_HUMAN	1	42.4504	1.4245	Dengue	QC	NaN	NaN	NaN	118.671	0.0611839
Dengue / QC	_LGFTDLFSK_	P29622	0.61458	0.61458	2.91451e-15	2.87425e-14	72	P29622	SERPINA4	Kallistatin	KAIN_HUMAN	1	53.1112	1.53111	Dengue	QC	NaN	NaN	NaN	62.2423	0.0984036
Dengue / QC	_QC[Carbamidomethyl (C)]SKEDGGGWWYNR_	P02675	3.29766	3.29766	2.91909e-15	2.87425e-14	84	P02675	FGB	Fibrinogen beta chain	FIBB_HUMAN	1	883.317	9.83317	Dengue	QC	NaN	NaN	NaN	62.0531	0.290963
Dengue / QC	_QLEQVIAKDLLPSRDR_	P02671	5.7502	5.7502	3.11667e-15	3.05383e-14	26	P02671	FGA	Fibrinogen alpha chain	FIBA_HUMAN	1	5282.49	53.8249	Dengue	QC	NaN	NaN	NaN	18.1971	0.184948
Dengue / QC	_NIFISPVSISMALAMLSLGTC[Carbamidomethyl (C)]GHTR_	P08185	0.785793	0.785793	3.3332e-15	3.24489e-14	140	P08185	SERPINA6	Corticosteroid-binding globulin	CBG_HUMAN	1	72.404	1.72404	Dengue	QC	NaN	NaN	NaN	126.899	0.089364
Dengue / QC	_ESATITC[Carbamidomethyl (C)]LVTGFSPADVFVQWM[Oxidation (M)]QR_	P01871	0.866521	0.866521	3.51048e-15	3.41196e-14	102	P01871	IGHM	Immunoglobulin heavy constant mu	IGHM_HUMAN	1	82.3261	1.82326	Dengue	QC	NaN	NaN	NaN	65.0751	0.0840119
Dengue / QC	_GNLLQC[Carbamidomethyl (C)]IC[Carbamidomethyl (C)]TGNGRGEWK_	P02751;P02751-15;P02751-3;P02751-7	1.73558	1.73558	3.89075e-15	3.75131e-14	76	P02751;P02751-15;P02751-3;P02751-7	FN1	Fibronectin;Isoform 15 of Fibronectin;Isoform 3 of Fibronectin;Isoform 7 of Fibronectin	FINC_HUMAN	1	233.014	3.33014	Dengue	QC	NaN	NaN	NaN	66.2654	0.164445
Dengue / QC	_C[Carbamidomethyl (C)]PAPELLGGPSVFLFPPKPKDTLMISR_	P01860	4.10508	4.10508	3.95754e-15	3.8096e-14	44	P01860	IGHG3	Immunoglobulin heavy constant gamma 3	IGHG3_HUMAN	1	1620.88	17.2088	Dengue	QC	NaN	NaN	NaN	30.3862	0.268497
Dengue / QC	_DTLM[Oxidation (M)]ISRTPEVTC[Carbamidomethyl (C)]VVVDVSHEDPEVK_	P01857	0.0733015	0.0733015	4.12227e-15	3.94298e-14	144	P01857	IGHG1	Immunoglobulin heavy constant gamma 1	IGHG1_HUMAN	1	5.21216	1.05212	Dengue	QC	NaN	NaN	NaN	74.0818	0.651498
Dengue / QC	_ELISLVEDVSSNYDGC[Carbamidomethyl (C)]C[Carbamidomethyl (C)]EGDVVQC[Carbamidomethyl (C)]IR_	P43652	1.17194	1.17194	4.1791e-15	3.99101e-14	68	P43652	AFM	Afamin	AFAM_HUMAN	1	125.314	2.25314	Dengue	QC	NaN	NaN	NaN	58.0063	0.116457
Dengue / QC	_YVM[Oxidation (M)]LPVADQYDC[Carbamidomethyl (C)]ITHYEGSTC[Carbamidomethyl (C)]PK_	P00739	1.79874	1.79874	4.33976e-15	4.13788e-14	76	P00739	HPR	Haptoglobin-related protein	HPTR_HUMAN	1	247.917	3.47917	Dengue	QC	NaN	NaN	NaN	62.1335	0.175085
Dengue / QC	_LRLEPGKEYLIMGLDGATYDLEGHPQYLLDSNSWIEEMPSER_	P0C0L5	1.0533	1.0533	4.91388e-15	4.67051e-14	160	P0C0L5	C4B	Complement C4-B	CO4B_HUMAN	1	107.527	2.07527	Dengue	QC	NaN	NaN	NaN	113.663	0.135342
Dengue / QC	_REEAPSLRPAPPPISGGGYR_	P02675	3.65724	3.65724	5.10693e-15	4.84636e-14	88	P02675	FGB	Fibrinogen beta chain	FIBB_HUMAN	1	1161.65	12.6165	Dengue	QC	NaN	NaN	NaN	63.7927	0.310439
Dengue / QC	_VNWEEEAASGLLTSLKDNVPK_	P04114	0.726284	0.726284	5.1429e-15	4.8663e-14	136	P04114	APOB	Apolipoprotein B-100	APOB_HUMAN	1	65.4372	1.65437	Dengue	QC	NaN	NaN	NaN	104.707	0.083932
Dengue / QC	_TLMNLGGLAVAR_	P37802;X6RJP6	1.44973	1.44973	5.18869e-15	4.90079e-14	46	P37802;X6RJP6	TAGLN2	Transgelin-2;Transgelin-2 (Fragment)	TAGL2_HUMAN;X6RJP6_HUMAN	1	173.157	2.73157	Dengue	QC	NaN	NaN	NaN	30.1289	0.128408
Dengue / QC	_NYYKLRTEGDGVYTLNNEK_	P00738	3.66351	3.66351	5.55814e-15	5.21703e-14	46	P00738	HP	Haptoglobin	HPT_HUMAN	1	1167.14	12.6714	Dengue	QC	NaN	NaN	NaN	38.3199	0.325767
Dengue / QC	_MKFAC[Carbamidomethyl (C)]YYPR_	P0C0L5	1.79294	1.79294	5.68604e-15	5.32878e-14	78	P0C0L5	C4B	Complement C4-B	CO4B_HUMAN	1	246.521	3.46521	Dengue	QC	NaN	NaN	NaN	63.7865	0.201768
Dengue / QC	_LFLGALPGEDSSTSFC[Carbamidomethyl (C)]LNGLWAQGQR_	I3L145;P04278	1.53149	1.53149	6.18636e-15	5.76183e-14	84	I3L145;P04278	SHBG	Sex hormone-binding globulin	I3L145_HUMAN;SHBG_HUMAN	1	189.084	2.89084	Dengue	QC	NaN	NaN	NaN	71.3206	0.154328
Dengue / QC	_YEVSVYALKDTLTSRPAQGVVTTLENVSPPR_	P02751;P02751-15;P02751-3;P02751-7	1.41588	1.41588	6.27189e-15	5.829e-14	56	P02751;P02751-15;P02751-3;P02751-7	FN1	Fibronectin;Isoform 15 of Fibronectin;Isoform 3 of Fibronectin;Isoform 7 of Fibronectin	FINC_HUMAN	1	166.822	2.66822	Dengue	QC	NaN	NaN	NaN	44.3703	0.131536
Dengue / QC	_VPAPPSPQPATYTC[Carbamidomethyl (C)]VVSHEDSR_	A0A0A0MS09;P01880;P01880-2	1.2705	1.2705	6.36655e-15	5.90228e-14	76	A0A0A0MS09;P01880;P01880-2	IGHD	Immunoglobulin heavy constant delta (Fragment);Immunoglobulin heavy constant delta;Isoform 2 of Immunoglobulin heavy constant delta	A0A0A0MS09_HUMAN;IGHD_HUMAN;IGHD_HUMAN	1	141.245	2.41245	Dengue	QC	NaN	NaN	NaN	56.2601	0.120803
Dengue / QC	_SPLFMGKVVNPTQK_	P01009	2.88756	2.88756	6.44306e-15	5.94577e-14	62	P01009	SERPINA1	Alpha-1-antitrypsin	A1AT_HUMAN	1	640.017	7.40017	Dengue	QC	NaN	NaN	NaN	46.022	0.214603
Dengue / QC	_WADLSGITK_	P29622	0.771264	0.771264	6.5554e-15	6.04019e-14	42	P29622	SERPINA4	Kallistatin	KAIN_HUMAN	1	70.6764	1.70676	Dengue	QC	NaN	NaN	NaN	35.283	0.0873599
Dengue / QC	_SMQGGLVGNDETVALTAFVTIALHHGLAVFQDEGAEPLK_	P0C0L5	1.21466	1.21466	7.70452e-15	7.01321e-14	88	P0C0L5	C4B	Complement C4-B	CO4B_HUMAN	1	132.086	2.32086	Dengue	QC	NaN	NaN	NaN	81.2572	0.128001
Dengue / QC	_SM[Oxidation (M)]GGKEDLIWELLNQAQEHFGK_	P02787	1.14727	1.14727	8.70017e-15	7.86015e-14	144	P02787	TF	Serotransferrin	TRFE_HUMAN	1	121.494	2.21494	Dengue	QC	NaN	NaN	NaN	133.958	0.117648
Dengue / QC	_TMTIHNGMFFSTYDRDNDGWLTSDPR_	P02675	3.4704	3.4704	8.93497e-15	8.05204e-14	36	P02675	FGB	Fibrinogen beta chain	FIBB_HUMAN	1	1008.4	11.084	Dengue	QC	NaN	NaN	NaN	27.1167	0.20638
Dengue / QC	_HGTDDGVVWM[Oxidation (M)]NWK_	P02675	2.80385	2.80385	8.93928e-15	8.05204e-14	32	P02675	FGB	Fibrinogen beta chain	FIBB_HUMAN	1	598.3	6.983	Dengue	QC	NaN	NaN	NaN	26.8659	0.17246
Dengue / QC	_EESPLLIGQQSTVSDVPRDLEVVAATPTSLLISWDAPAVTVR_	P02751;P02751-15;P02751-3;P02751-7	0.870822	0.870822	8.96273e-15	8.0611e-14	104	P02751;P02751-15;P02751-3;P02751-7	FN1	Fibronectin;Isoform 15 of Fibronectin;Isoform 3 of Fibronectin;Isoform 7 of Fibronectin	FINC_HUMAN	1	82.8705	1.82871	Dengue	QC	NaN	NaN	NaN	66.5857	0.168552
Dengue / QC	_C[Carbamidomethyl (C)]IEGTC[Carbamidomethyl (C)]VC[Carbamidomethyl (C)]KLPYQC[Carbamidomethyl (C)]PK_	E7ETH0;G3XAM2;P05156	2.62415	2.62415	1.08597e-14	9.66624e-14	68	E7ETH0;G3XAM2;P05156	CFI	Complement factor I	E7ETH0_HUMAN;G3XAM2_HUMAN;CFAI_HUMAN	1	516.522	6.16522	Dengue	QC	NaN	NaN	NaN	48.2299	0.255594
Dengue / QC	_NFATSNKM[Oxidation (M)]DMTFSK_	P04114	1.14529	1.14529	1.105e-14	9.82109e-14	40	P04114	APOB	Apolipoprotein B-100	APOB_HUMAN	1	121.191	2.21191	Dengue	QC	NaN	NaN	NaN	25.0222	0.0922374
Dengue / QC	_EYVLPHFSVSIEPEYNFIGYK_	P01031	0.658253	0.658253	1.10919e-14	9.84389e-14	90	P01031	C5	Complement C5	CO5_HUMAN	1	57.8171	1.57817	Dengue	QC	NaN	NaN	NaN	77.9123	0.0966113
Dengue / QC	_GSFSTTVTGR_	P08519	1.61334	1.61334	1.13159e-14	1.0018e-13	136	P08519	LPA	Apolipoprotein(a)	APOA_HUMAN	1	205.96	3.0596	Dengue	QC	NaN	NaN	NaN	123.364	0.184345
Dengue / QC	_MC[Carbamidomethyl (C)]VDVNEC[Carbamidomethyl (C)]QRYPGR_	P23142	3.30943	3.30943	1.14483e-14	1.01154e-13	88	P23142	FBLN1	Fibulin-1	FBLN1_HUMAN	1	891.375	9.91375	Dengue	QC	NaN	NaN	NaN	65.2291	0.316207
Dengue / QC	_RC[Carbamidomethyl (C)]C[Carbamidomethyl (C)]QDGVTRLPMMR_	P0C0L5	2.96858	2.96858	1.1507e-14	1.01376e-13	86	P0C0L5	C4B	Complement C4-B	CO4B_HUMAN	1	682.766	7.82766	Dengue	QC	NaN	NaN	NaN	68.1446	0.245371
Dengue / QC	_EGGQTAPASTR_	P06396	1.1314	1.1314	1.19701e-14	1.05148e-13	112	P06396	GSN	Gelsolin	GELS_HUMAN	1	119.072	2.19072	Dengue	QC	NaN	NaN	NaN	97.299	0.118147
Dengue / QC	_SVAVYGQYGGQPC[Carbamidomethyl (C)]VGNAFETQSC[Carbamidomethyl (C)]EPTRGC[Carbamidomethyl (C)]PTEEGC[Carbamidomethyl (C)]GER_	P10643	2.67487	2.67487	1.24428e-14	1.08824e-13	50	P10643	C7	Complement component C7	CO7_HUMAN	1	538.583	6.38583	Dengue	QC	NaN	NaN	NaN	39.0737	0.189318
Dengue / QC	_FPSGTFEQVSQLVK_	P02774;P02774-3	0.861782	0.861782	1.30036e-14	1.134e-13	68	P02774;P02774-3	GC	Vitamin D-binding protein;Isoform 3 of Vitamin D-binding protein	VTDB_HUMAN	1	81.7281	1.81728	Dengue	QC	NaN	NaN	NaN	59.574	0.0757864
Dengue / QC	_KQC[Carbamidomethyl (C)]SKEDGGGWWYNR_	P02675	2.26949	2.26949	1.30404e-14	1.13557e-13	34	P02675	FGB	Fibrinogen beta chain	FIBB_HUMAN	1	382.153	4.82153	Dengue	QC	NaN	NaN	NaN	28.9627	0.142831
Dengue / QC	_VYC[Carbamidomethyl (C)]DMNTENGGWTVIQNR_	P02675	3.76898	3.76898	1.31379e-14	1.14077e-13	112	P02675	FGB	Fibrinogen beta chain	FIBB_HUMAN	1	1263.25	13.6325	Dengue	QC	NaN	NaN	NaN	74.1253	0.37162
Dengue / QC	_V[Acetyl (Protein N-term)]LSPADKTNVK_	P69905	1.42918	1.42918	1.32496e-14	1.14881e-13	136	P69905	HBA1	Hemoglobin subunit alpha	HBA_HUMAN	1	169.294	2.69294	Dengue	QC	NaN	NaN	NaN	101.621	0.13734
Dengue / QC	_ESGMTMEELK_	P20851;P20851-2	1.20247	1.20247	1.35756e-14	1.1737e-13	42	P20851;P20851-2	C4BPB	C4b-binding protein beta chain;Isoform 2 of C4b-binding protein beta chain	C4BPB_HUMAN	1	130.134	2.30134	Dengue	QC	NaN	NaN	NaN	32.5602	0.0980559
Dengue / QC	_GATLALTQVTPQDER_	P43121	1.30749	1.30749	1.3796e-14	1.18934e-13	64	P43121	MCAM	Cell surface glycoprotein MUC18	MUC18_HUMAN	1	147.511	2.47511	Dengue	QC	NaN	NaN	NaN	39.9735	0.131462
Dengue / QC	_KVFLDC[Carbamidomethyl (C)]C[Carbamidomethyl (C)]NYITELR_	P01024	1.09884	1.09884	1.43019e-14	1.22419e-13	60	P01024	C3	Complement C3	CO3_HUMAN	1	114.183	2.14183	Dengue	QC	NaN	NaN	NaN	49.3129	0.0932375
Dengue / QC	_AINEKLGQYASPTAKR_	P0C0L5	3.42515	3.42515	1.43755e-14	1.22875e-13	60	P0C0L5	C4B	Complement C4-B	CO4B_HUMAN	1	974.169	10.7417	Dengue	QC	NaN	NaN	NaN	40.6289	0.275908
Dengue / QC	_MGPSSAVPGDSMQLAITGGNEEGFFTTR_	P23142-4	1.18744	1.18744	1.68308e-14	1.42647e-13	126	P23142-4	FBLN1	Isoform C of Fibulin-1	FBLN1_HUMAN	1	127.749	2.27749	Dengue	QC	NaN	NaN	NaN	115.603	0.135152
Dengue / QC	_ILGDMQPGDYFDLVLFGTR_	P19827	0.859443	0.859443	1.72957e-14	1.46176e-13	110	P19827	ITIH1	Inter-alpha-trypsin inhibitor heavy chain H1	ITIH1_HUMAN	1	81.4338	1.81434	Dengue	QC	NaN	NaN	NaN	40.1406	0.102154
Dengue / QC	_GTLSTTITGR_	P08519	1.54327	1.54327	1.93005e-14	1.61759e-13	110	P08519	LPA	Apolipoprotein(a)	APOA_HUMAN	1	191.455	2.91455	Dengue	QC	NaN	NaN	NaN	81.1672	0.154502
Dengue / QC	_GDFSSANNRDNTYNR_	P02671	3.97388	3.97388	1.93579e-14	1.62015e-13	54	P02671	FGA	Fibrinogen alpha chain	FIBA_HUMAN	1	1471.3	15.713	Dengue	QC	NaN	NaN	NaN	35.9816	0.314908
Dengue / QC	_SVPMVPPGIKYLYLR_	P51884	3.32002	3.32002	1.94231e-14	1.6211e-13	34	P51884	LUM	Lumican	LUM_HUMAN	1	898.68	9.9868	Dengue	QC	NaN	NaN	NaN	24.3796	0.283985
Dengue / QC	_TAVNALWGK_	P02042	0.468103	0.468103	2.00363e-14	1.66536e-13	106	P02042	HBD	Hemoglobin subunit delta	HBD_HUMAN	1	38.329	1.38329	Dengue	QC	NaN	NaN	NaN	94.3027	0.0541374
Dengue / QC	_DYELLC[Carbamidomethyl (C)]LDGTRK_	P02787	2.17854	2.17854	2.28239e-14	1.88149e-13	82	P02787	TF	Serotransferrin	TRFE_HUMAN	1	352.694	4.52694	Dengue	QC	NaN	NaN	NaN	41.164	0.18419
Dengue / QC	_DNDGWLTSDPRK_	P02675	3.99639	3.99639	2.30037e-14	1.89372e-13	22	P02675	FGB	Fibrinogen beta chain	FIBB_HUMAN	1	1496	15.96	Dengue	QC	NaN	NaN	NaN	16.4846	0.147649
Dengue / QC	_SLKVVPEGIR_	P01024	2.08906	2.08906	2.35815e-14	1.936e-13	86	P01024	C3	Complement C3	CO3_HUMAN	1	325.47	4.2547	Dengue	QC	NaN	NaN	NaN	55.3272	0.226476
Dengue / QC	_GGGAGFISGLSYLELDNPAGNKRR_	P10643	2.24479	2.24479	2.40091e-14	1.96842e-13	34	P10643	C7	Complement component C7	CO7_HUMAN	1	373.967	4.73967	Dengue	QC	NaN	NaN	NaN	28.3384	0.16345
Dengue / QC	_TMFIGGSQLSQK_	P80108	1.12331	1.12331	2.42895e-14	1.9887e-13	36	P80108	GPLD1	Phosphatidylinositol-glycan-specific phospholipase D	PHLD_HUMAN	1	117.846	2.17846	Dengue	QC	NaN	NaN	NaN	29.1307	0.101749
Dengue / QC	_C[Carbamidomethyl (C)]C[Carbamidomethyl (C)]QDGVTR_	P0C0L5	0.901253	0.901253	2.51051e-14	2.05269e-13	136	P0C0L5	C4B	Complement C4-B	CO4B_HUMAN	1	86.7688	1.86769	Dengue	QC	NaN	NaN	NaN	89.976	0.10519
Dengue / QC	_YRGDQDATMSILDISMMTGFAPDTDDLKQLANGVDR_	P01024	0.805466	0.805466	2.55637e-14	2.08453e-13	140	P01024	C3	Complement C3	CO3_HUMAN	1	74.771	1.74771	Dengue	QC	NaN	NaN	NaN	94.5395	0.0932776
Dengue / QC	_C[Carbamidomethyl (C)]FDHAAGTSYVVGETWEKPYQGWMMVDC[Carbamidomethyl (C)]TC[Carbamidomethyl (C)]LGEGSGR_	P02751;P02751-15;P02751-3;P02751-7	1.49723	1.49723	2.60974e-14	2.12517e-13	56	P02751;P02751-15;P02751-3;P02751-7	FN1	Fibronectin;Isoform 15 of Fibronectin;Isoform 3 of Fibronectin;Isoform 7 of Fibronectin	FINC_HUMAN	1	182.299	2.82299	Dengue	QC	NaN	NaN	NaN	47.6399	0.137773
Dengue / QC	_EWFWDLATGTMKER_	P02790	0.602477	0.602477	3.20262e-14	2.59046e-13	122	P02790	HPX	Hemopexin	HEMO_HUMAN	1	51.8321	1.51832	Dengue	QC	NaN	NaN	NaN	60.6372	0.0714207
Dengue / QC	_IADVTSGLIGGEDGR_	P80108	0.387149	0.387149	3.23218e-14	2.606e-13	162	P80108	GPLD1	Phosphatidylinositol-glycan-specific phospholipase D	PHLD_HUMAN	1	30.7807	1.30781	Dengue	QC	NaN	NaN	NaN	153.6	0.0575219
Dengue / QC	_LLNNWDVC[Carbamidomethyl (C)]ADMVGTFTDTEDPAKFK_	P02753;Q5VY30	0.857324	0.857324	3.35806e-14	2.69809e-13	128	P02753;Q5VY30	RBP4	Retinol-binding protein 4;Retinol binding protein 4, plasma, isoform CRA_b	RET4_HUMAN;Q5VY30_HUMAN	1	81.1675	1.81167	Dengue	QC	NaN	NaN	NaN	97.595	0.0987814
Dengue / QC	_ATWSGAVLAGRDAVLR_	P04217	3.96924	3.96924	3.73664e-14	2.96667e-13	74	P04217	A1BG	Alpha-1B-glycoprotein	A1BG_HUMAN	1	1466.25	15.6625	Dengue	QC	NaN	NaN	NaN	51.2292	0.355697
Dengue / QC	_WNPSPPAC[Carbamidomethyl (C)]EPNSC[Carbamidomethyl (C)]INLPDIPHASWETYPRPTK_	P04003	1.20135	1.20135	3.77437e-14	2.99268e-13	80	P04003	C4BPA	C4b-binding protein alpha chain	C4BPA_HUMAN	1	129.954	2.29954	Dengue	QC	NaN	NaN	NaN	30.9859	0.123015
Dengue / QC	_QLSLPETGELDSATLK_	P14780	0.721344	0.721344	3.781e-14	2.994e-13	58	P14780	MMP9	Matrix metalloproteinase-9	MMP9_HUMAN	1	64.8718	1.64872	Dengue	QC	NaN	NaN	NaN	46.6798	0.123501
Dengue / QC	_MKPVPDLVPGNFK_	P02671	3.40734	3.40734	4.19724e-14	3.31055e-13	88	P02671	FGA	Fibrinogen alpha chain	FIBA_HUMAN	1	960.989	10.6099	Dengue	QC	NaN	NaN	NaN	65.1504	0.329242
Dengue / QC	_VISTLEEPTPQC[Carbamidomethyl (C)]PTSQGR_	P09172	0.922962	0.922962	4.78186e-14	3.72293e-13	86	P09172	DBH	Dopamine beta-hydroxylase	DOPO_HUMAN	1	89.6004	1.896	Dengue	QC	NaN	NaN	NaN	62.3529	0.130511
Dengue / QC	_LFLEPTRKDIALLK_	P00747	3.28683	3.28683	4.88152e-14	3.79562e-13	74	P00747	PLG	Plasminogen	PLMN_HUMAN	1	875.966	9.75966	Dengue	QC	NaN	NaN	NaN	45.4788	0.259591
Dengue / QC	_QGFGNVATNTDGK_	P02675	2.35764	2.35764	4.98073e-14	3.86507e-13	124	P02675	FGB	Fibrinogen beta chain	FIBB_HUMAN	1	412.532	5.12532	Dengue	QC	NaN	NaN	NaN	90.0896	0.26755
Dengue / QC	_QSGLYFIKPLK_	P02679;P02679-2	3.08204	3.08204	5.20842e-14	4.01355e-13	84	P02679;P02679-2	FGG	Fibrinogen gamma chain;Isoform Gamma-A of Fibrinogen gamma chain	FIBG_HUMAN	1	746.809	8.46809	Dengue	QC	NaN	NaN	NaN	62.1974	0.298053
Dengue / QC	_IIRSSEDPNEDIVER_	P01591	3.59997	3.59997	5.23175e-14	4.02638e-13	38	P01591	JCHAIN	Immunoglobulin J chain	IGJ_HUMAN	1	1112.55	12.1255	Dengue	QC	NaN	NaN	NaN	28.9053	0.236336
Dengue / QC	_M[Oxidation (M)]KPVPDLVPGNFK_	P02671	2.94529	2.94529	5.61314e-14	4.30889e-13	30	P02671	FGA	Fibrinogen alpha chain	FIBA_HUMAN	1	670.229	7.70229	Dengue	QC	NaN	NaN	NaN	21.3669	0.147111
Dengue / QC	_TPENYPNAGLTMNYC[Carbamidomethyl (C)]RNPDADKGPWC[Carbamidomethyl (C)]FTTDPSVR_	P00747	1.57109	1.57109	5.86369e-14	4.47273e-13	96	P00747	PLG	Plasminogen	PLMN_HUMAN	1	197.129	2.97129	Dengue	QC	NaN	NaN	NaN	78.984	0.172746
Dengue / QC	_TLLVFEVQQPFLFVLWDQQHKFPVFMGR_	P05155;P05155-3	3.22686	3.22686	5.90758e-14	4.50008e-13	40	P05155;P05155-3	SERPING1	Plasma protease C1 inhibitor;Isoform 3 of Plasma protease C1 inhibitor	IC1_HUMAN	1	836.228	9.36228	Dengue	QC	NaN	NaN	NaN	27.129	0.197247
Dengue / QC	_KWDPYKQGFGNVATNTDGK_	P02675	2.7147	2.7147	7.19605e-14	5.43401e-13	66	P02675	FGB	Fibrinogen beta chain	FIBB_HUMAN	1	556.458	6.56458	Dengue	QC	NaN	NaN	NaN	56.5184	0.245437
Dengue / QC	_HYEGSTVPEKKTPK_	P00738	4.63169	4.63169	7.22909e-14	5.45213e-13	32	P00738	HP	Haptoglobin	HPT_HUMAN	1	2379	24.79	Dengue	QC	NaN	NaN	NaN	25.9696	0.26496
Dengue / QC	_C[Carbamidomethyl (C)]VDVDEC[Carbamidomethyl (C)]APPAEPC[Carbamidomethyl (C)]GK_	P23142	0.771128	0.771128	7.24131e-14	5.45452e-13	148	P23142	FBLN1	Fibulin-1	FBLN1_HUMAN	1	70.6603	1.7066	Dengue	QC	NaN	NaN	NaN	139.028	0.0883313
Dengue / QC	_NGFKSHALQLNNR_	P0C0L5	3.1202	3.1202	7.37338e-14	5.54014e-13	64	P0C0L5	C4B	Complement C4-B	CO4B_HUMAN	1	769.507	8.69507	Dengue	QC	NaN	NaN	NaN	51.4801	0.240424
Dengue / QC	_SETAEELKK_	O14791;O14791-2	0.858294	0.858294	7.76346e-14	5.8115e-13	158	O14791;O14791-2	APOL1	Apolipoprotein L1;Isoform 2 of Apolipoprotein L1	APOL1_HUMAN	1	81.2893	1.81289	Dengue	QC	NaN	NaN	NaN	107.147	0.105071
Dengue / QC	_QSNNKYAASSYLSLTPEQWKSHR_	P0DOY2	3.45442	3.45442	7.98027e-14	5.95899e-13	94	P0DOY2	IGLC2	Immunoglobulin lambda constant 2	IGLC2_HUMAN	1	996.182	10.9618	Dengue	QC	NaN	NaN	NaN	66.0272	0.321097
Dengue / QC	_RYTIAALLSPYSYSTTAVVTNPK_	P02766	0.595196	0.595196	7.99479e-14	5.96245e-13	158	P02766	TTR	Transthyretin	TTHY_HUMAN	1	51.0678	1.51068	Dengue	QC	NaN	NaN	NaN	132.361	0.0785948
Dengue / QC	_FSDEGTHESQISFTIEGPLTSFGLSNK_	P04114	1.07893	1.07893	8.00537e-14	5.96297e-13	98	P04114	APOB	Apolipoprotein B-100	APOB_HUMAN	1	111.247	2.11247	Dengue	QC	NaN	NaN	NaN	82.6347	0.137815
Dengue / QC	_SQLQKVPPEWK_	P02671	4.59323	4.59323	8.40034e-14	6.24173e-13	22	P02671	FGA	Fibrinogen alpha chain	FIBA_HUMAN	1	2313.79	24.1379	Dengue	QC	NaN	NaN	NaN	14.5886	0.157765
Dengue / QC	_VAQLEAQC[Carbamidomethyl (C)]QEPC[Carbamidomethyl (C)]KDTVQIHDITGKDC[Carbamidomethyl (C)]QDIANK_	P02679;P02679-2	2.63374	2.63374	8.66177e-14	6.42015e-13	70	P02679;P02679-2	FGG	Fibrinogen gamma chain;Isoform Gamma-A of Fibrinogen gamma chain	FIBG_HUMAN	1	520.631	6.20631	Dengue	QC	NaN	NaN	NaN	54.727	0.250905
Dengue / QC	_VSFLSALEEYTK_	P02647	0.983387	0.983387	9.23918e-14	6.8146e-13	52	P02647	APOA1	Apolipoprotein A-I	APOA1_HUMAN	1	97.7101	1.9771	Dengue	QC	NaN	NaN	NaN	15.449	0.043943
Dengue / QC	_AHYGGFTVQNEANK_	P02675	3.17929	3.17929	9.60817e-14	7.0781e-13	72	P02675	FGB	Fibrinogen beta chain	FIBB_HUMAN	1	805.859	9.05859	Dengue	QC	NaN	NaN	NaN	53.5373	0.280747
Dengue / QC	_EPC[Carbamidomethyl (C)]VESLVSQYFQTVTDYGKDLMEK_	P02652;V9GYM3	0.843823	0.843823	9.72506e-14	7.14673e-13	168	P02652;V9GYM3	APOA2	Apolipoprotein A-II	APOA2_HUMAN;V9GYM3_HUMAN	1	79.48	1.7948	Dengue	QC	NaN	NaN	NaN	71.1843	0.0882399
Dengue / QC	_PLLVDVDLQYPQDAVLALTQNHHK_	P19827	0.854893	0.854893	1.08704e-13	7.9017e-13	110	P19827	ITIH1	Inter-alpha-trypsin inhibitor heavy chain H1	ITIH1_HUMAN	1	80.8624	1.80862	Dengue	QC	NaN	NaN	NaN	88.1814	0.114551
Dengue / QC	_VNIPLVTNEEC[Carbamidomethyl (C)]QK_	H0YAC1;P03952	1.2944	1.2944	1.1073e-13	8.02956e-13	44	H0YAC1;P03952	KLKB1	Plasma kallikrein (Fragment);Plasma kallikrein	H0YAC1_HUMAN;KLKB1_HUMAN	1	145.274	2.45274	Dengue	QC	NaN	NaN	NaN	31.0709	0.106549
Dengue / QC	_AC[Carbamidomethyl (C)]EPGVDYVYKTR_	P01024	3.1273	3.1273	1.19368e-13	8.5939e-13	36	P01024	C3	Complement C3	CO3_HUMAN	1	773.8	8.738	Dengue	QC	NaN	NaN	NaN	29.0349	0.182639
Dengue / QC	_AHYGGFTVQNEANKYQISVNKYR_	P02675	2.23187	2.23187	1.21106e-13	8.70864e-13	44	P02675	FGB	Fibrinogen beta chain	FIBB_HUMAN	1	369.744	4.69744	Dengue	QC	NaN	NaN	NaN	39.5474	0.194742
Dengue / QC	_SRLLATLC[Carbamidomethyl (C)]SAEVC[Carbamidomethyl (C)]QC[Carbamidomethyl (C)]AEGK_	P0C0L5	1.96045	1.96045	1.22759e-13	8.81703e-13	102	P0C0L5	C4B	Complement C4-B	CO4B_HUMAN	1	289.183	3.89183	Dengue	QC	NaN	NaN	NaN	78.6436	0.249217
Dengue / QC	_TC[Carbamidomethyl (C)]QSWSSMTPHWHQR_	P08519	2.38046	2.38046	1.2525e-13	8.96387e-13	80	P08519	LPA	Apolipoprotein(a)	APOA_HUMAN	1	420.701	5.20701	Dengue	QC	NaN	NaN	NaN	65.9996	0.221952
Dengue / QC	_EIEEVLTPEMLMR_	P29622	0.499664	0.499664	1.2879e-13	9.19533e-13	122	P29622	SERPINA4	Kallistatin	KAIN_HUMAN	1	41.3884	1.41388	Dengue	QC	NaN	NaN	NaN	93.4436	0.0769845
Dengue / QC	_YLGEEYVKAVGNLRK_	P02787	2.37229	2.37229	1.37879e-13	9.77484e-13	118	P02787	TF	Serotransferrin	TRFE_HUMAN	1	417.762	5.17762	Dengue	QC	NaN	NaN	NaN	87.0991	0.245799
Dengue / QC	_LLSHC[Carbamidomethyl (C)]LLVTLAAHLPAEFTPAVHASLDKFLASVSTVLTSKYR_	P69905	2.46441	2.46441	1.44593e-13	1.02147e-12	46	P69905	HBA1	Hemoglobin subunit alpha	HBA_HUMAN	1	451.901	5.51901	Dengue	QC	NaN	NaN	NaN	27.6378	0.120267
Dengue / QC	_RNFGYTLR_	P05546	1.01664	1.01664	1.48527e-13	1.04681e-12	96	P05546	SERPIND1	Heparin cofactor 2	HEP2_HUMAN	1	102.321	2.02321	Dengue	QC	NaN	NaN	NaN	46.0172	0.100245
Dengue / QC	_LSFYYLIMAK_	P01023	1.0687	1.0687	1.48953e-13	1.04859e-12	126	P01023	A2M	Alpha-2-macroglobulin	A2MG_HUMAN	1	109.754	2.09754	Dengue	QC	NaN	NaN	NaN	108.462	0.134372
Dengue / QC	_VQQNVPSGTDTGDPQSKPLGDWAAGTMDPESSIFIEDAIK_	O14791;O14791-2	0.741418	0.741418	1.51376e-13	1.06193e-12	108	O14791;O14791-2	APOL1	Apolipoprotein L1;Isoform 2 of Apolipoprotein L1	APOL1_HUMAN	1	67.1818	1.67182	Dengue	QC	NaN	NaN	NaN	96.7421	0.09245
Dengue / QC	_DGRWQSIPLC[Carbamidomethyl (C)]VEK_	P08603	2.09579	2.09579	1.52148e-13	1.0661e-12	36	P08603	CFH	Complement factor H	CFAH_HUMAN	1	327.461	4.27461	Dengue	QC	NaN	NaN	NaN	28.3644	0.140626
Dengue / QC	_QGLLPVLESFK_	P02647	1.49119	1.49119	1.54417e-13	1.07948e-12	46	P02647	APOA1	Apolipoprotein A-I	APOA1_HUMAN	1	181.12	2.8112	Dengue	QC	NaN	NaN	NaN	35.0047	0.10276
Dengue / QC	_EDYLDVYVFGVGPLVNQVNINALASK_	B4E1Z4	1.35934	1.35934	1.57325e-13	1.096e-12	136	B4E1Z4	NaN	cDNA FLJ55673, highly similar to Complement factor B (EC 3.4.21.47)	B4E1Z4_HUMAN	1	156.567	2.56567	Dengue	QC	NaN	NaN	NaN	50.0258	0.115941
Dengue / QC	_ALDYYMLR_	Q9Y490	1.48784	1.48784	1.59928e-13	1.11285e-12	44	Q9Y490	TLN1	Talin-1	TLN1_HUMAN	1	180.468	2.80468	Dengue	QC	NaN	NaN	NaN	34.0581	0.126037
Dengue / QC	_APDVFPIISGC[Carbamidomethyl (C)]R_	A0A0A0MS09;P01880;P01880-2	1.2793	1.2793	1.67094e-13	1.16004e-12	70	A0A0A0MS09;P01880;P01880-2	IGHD	Immunoglobulin heavy constant delta (Fragment);Immunoglobulin heavy constant delta;Isoform 2 of Immunoglobulin heavy constant delta	A0A0A0MS09_HUMAN;IGHD_HUMAN;IGHD_HUMAN	1	142.721	2.42721	Dengue	QC	NaN	NaN	NaN	59.1663	0.174446
Dengue / QC	_HVSSPLASYFLSFPYAR_	P80108	0.943288	0.943288	1.67944e-13	1.1646e-12	98	P80108	GPLD1	Phosphatidylinositol-glycan-specific phospholipase D	PHLD_HUMAN	1	92.2905	1.92291	Dengue	QC	NaN	NaN	NaN	54.5007	0.110077
Dengue / QC	_INC[Carbamidomethyl (C)]QGKTYLFKGSQYWR_	P04004	2.66159	2.66159	1.74865e-13	1.21119e-12	52	P04004	VTN	Vitronectin	VTNC_HUMAN	1	532.728	6.32728	Dengue	QC	NaN	NaN	NaN	42.2746	0.212341
Dengue / QC	_ETYDFDIAVLR_	P00742	0.837772	0.837772	1.81279e-13	1.25274e-12	140	P00742	F10	Coagulation factor X	FA10_HUMAN	1	78.7288	1.78729	Dengue	QC	NaN	NaN	NaN	71.5506	0.0929264
Dengue / QC	_GLASANVDFAFSLYKHLVALSPK_	P08185	0.529571	0.529571	1.87361e-13	1.29079e-12	116	P08185	SERPINA6	Corticosteroid-binding globulin	CBG_HUMAN	1	44.35	1.4435	Dengue	QC	NaN	NaN	NaN	75.4711	0.133846
Dengue / QC	_TLMFGSYLDDEKNWGLSFYADKPETTK_	P19652	0.548884	0.548884	1.97818e-13	1.35307e-12	164	P19652	ORM2	Alpha-1-acid glycoprotein 2	A1AG2_HUMAN	1	46.2954	1.46295	Dengue	QC	NaN	NaN	NaN	134.924	0.0705601
Dengue / QC	_TENC[Carbamidomethyl (C)]AVLSGAANGK_	E9PHK0;P05452	1.31952	1.31952	1.99016e-13	1.35942e-12	28	E9PHK0;P05452	CLEC3B	Tetranectin	E9PHK0_HUMAN;TETN_HUMAN	1	149.584	2.49584	Dengue	QC	NaN	NaN	NaN	13.2969	0.238839
Dengue / QC	_AGAAPYVQAFDSLLAGPVAEYLK_	Q01518;Q5T0R1;Q5T0R2;Q5T0R3;Q5T0R4;Q5T0R5;Q5T0R6;Q5T0R7	1.17935	1.17935	2.00883e-13	1.36782e-12	42	Q01518;Q5T0R1;Q5T0R2;Q5T0R3;Q5T0R4;Q5T0R5;Q5T0R6;Q5T0R7	CAP1	Adenylyl cyclase-associated protein 1;Adenylyl cyclase-associated protein 1 (Fragment);Adenylyl cyclase-associated protein 1 (Fragment);Adenylyl cyclase-associated protein 1 (Fragment);Adenylyl cyclase-associated protein 1 (Fragment);Adenylyl cyclase-associated protein 1 (Fragment);Adenylyl cyclase-associated protein 1 (Fragment);Adenylyl cyclase-associated protein 1 (Fragment)	CAP1_HUMAN;Q5T0R1_HUMAN;Q5T0R2_HUMAN;Q5T0R3_HUMAN;Q5T0R4_HUMAN;Q5T0R5_HUMAN;Q5T0R6_HUMAN;Q5T0R7_HUMAN	1	126.475	2.26475	Dengue	QC	NaN	NaN	NaN	32.2837	0.128122
Dengue / QC	_LRYTTEIIK_	B4DPQ0	1.30534	1.30534	2.11545e-13	1.43072e-12	46	B4DPQ0	C1R	Complement C1r subcomponent	B4DPQ0_HUMAN	1	147.142	2.47142	Dengue	QC	NaN	NaN	NaN	37.4091	0.171161
Dengue / QC	_IIYKENERFQYK_	P08603	4.10118	4.10118	2.20056e-13	1.48163e-12	64	P08603	CFH	Complement factor H	CFAH_HUMAN	1	1616.25	17.1625	Dengue	QC	NaN	NaN	NaN	43.6139	0.315282
Dengue / QC	_VAQLEAQC[Carbamidomethyl (C)]QEPC[Carbamidomethyl (C)]KDTVQIHDITGK_	P02679;P02679-2	2.5807	2.5807	2.2804e-13	1.53289e-12	96	P02679;P02679-2	FGG	Fibrinogen gamma chain;Isoform Gamma-A of Fibrinogen gamma chain	FIBG_HUMAN	1	498.228	5.98228	Dengue	QC	NaN	NaN	NaN	74.7106	0.276288
Dengue / QC	_QLFALYSGNDVTDISDDRFPKPPEIANGYVEHLFR_	P00739	1.53505	1.53505	2.28179e-13	1.53289e-12	46	P00739	HPR	Haptoglobin-related protein	HPTR_HUMAN	1	189.798	2.89798	Dengue	QC	NaN	NaN	NaN	37.396	0.131994
Dengue / QC	_SASDLTWDNLKGKK_	P02787	3.60389	3.60389	2.484e-13	1.66317e-12	86	P02787	TF	Serotransferrin	TRFE_HUMAN	1	1115.85	12.1585	Dengue	QC	NaN	NaN	NaN	56.538	0.344302
Dengue / QC	_PGMPFDLMVFVTNPDGSPAYR_	P01024	1.0242	1.0242	2.52871e-13	1.69123e-12	64	P01024	C3	Complement C3	CO3_HUMAN	1	103.383	2.03383	Dengue	QC	NaN	NaN	NaN	54.9339	0.120428
Dengue / QC	_GSWYSMR_	P02675	2.92737	2.92737	2.54881e-13	1.70278e-12	114	P02675	FGB	Fibrinogen beta chain	FIBB_HUMAN	1	660.72	7.6072	Dengue	QC	NaN	NaN	NaN	85.0802	0.323779
Dengue / QC	_TPKSPVGVQPILNEHTFC[Carbamidomethyl (C)]AGMSK_	P00738	2.83982	2.83982	2.57748e-13	1.72003e-12	108	P00738	HP	Haptoglobin	HPT_HUMAN	1	615.928	7.15928	Dengue	QC	NaN	NaN	NaN	66.9296	0.298233
Dengue / QC	_EGIVEYPRC[Carbamidomethyl (C)]E_	Q92496;Q92496-2	1.15338	1.15338	2.72825e-13	1.81662e-12	112	Q92496;Q92496-2	CFHR4	Complement factor H-related protein 4;Isoform 2 of Complement factor H-related protein 4	FHR4_HUMAN	1	122.435	2.22435	Dengue	QC	NaN	NaN	NaN	93.9491	0.138618
Dengue / QC	_GGASEHITTLAYQELPTADLM[Oxidation (M)]QEWGDAVQYNPAIIK_	P07358	-0.40798	0.40798	2.85942e-13	1.90186e-12	46	P07358	C8B	Complement component C8 beta chain	CO8B_HUMAN	1	-24.6322	0.753678	Dengue	QC	NaN	NaN	NaN	21.3781	0.371639
Dengue / QC	_LWAYLTIQELLAKR_	P19827	0.456147	0.456147	2.99182e-13	1.98554e-12	118	P19827	ITIH1	Inter-alpha-trypsin inhibitor heavy chain H1	ITIH1_HUMAN	1	37.1873	1.37187	Dengue	QC	NaN	NaN	NaN	84.933	0.127254
Dengue / QC	_LGNQEPGGQTALKSPPGVC[Carbamidomethyl (C)]SRDPTPEQTHR_	P08697	1.54601	1.54601	3.09799e-13	2.04698e-12	82	P08697	SERPINF2	Alpha-2-antiplasmin	A2AP_HUMAN	1	192.009	2.92009	Dengue	QC	NaN	NaN	NaN	66.4322	0.172199
Dengue / QC	_WFLLEQPEIQVAHFPFK_	P08697	1.20142	1.20142	3.16499e-13	2.08667e-12	26	P08697	SERPINF2	Alpha-2-antiplasmin	A2AP_HUMAN	1	129.966	2.29966	Dengue	QC	NaN	NaN	NaN	14.3999	0.156304
Dengue / QC	_LHELQEKLSPLGEEMRDR_	P02647	1.51763	1.51763	3.3178e-13	2.18265e-12	134	P02647	APOA1	Apolipoprotein A-I	APOA1_HUMAN	1	186.321	2.86321	Dengue	QC	NaN	NaN	NaN	117.684	0.163873
Dengue / QC	_NQEC[Carbamidomethyl (C)]IALPENIC[Carbamidomethyl (C)]GIGWHLVGNSC[Carbamidomethyl (C)]LK_	O75882;O75882-2	0.842881	0.842881	3.33956e-13	2.19457e-12	112	O75882;O75882-2	ATRN	Attractin;Isoform 2 of Attractin	ATRN_HUMAN	1	79.3629	1.79363	Dengue	QC	NaN	NaN	NaN	92.2361	0.103799
Dengue / QC	_SLEYLDLSFNQIAR_	P51884	0.819648	0.819648	3.48589e-13	2.27963e-12	136	P51884	LUM	Lumican	LUM_HUMAN	1	76.4975	1.76497	Dengue	QC	NaN	NaN	NaN	118.686	0.130006
Dengue / QC	_AVVEVDESGTR_	P05154	3.54833	3.54833	3.55835e-13	2.32063e-12	46	P05154	SERPINA5	Plasma serine protease inhibitor	IPSP_HUMAN	1	1069.91	11.6991	Dengue	QC	NaN	NaN	NaN	37.3638	0.318602
Dengue / QC	_GWSPTPR_	Q02985;Q02985-2	1.30751	1.30751	3.72556e-13	2.414e-12	62	Q02985;Q02985-2	CFHR3	Complement factor H-related protein 3;Isoform 2 of Complement factor H-related protein 3	FHR3_HUMAN	1	147.514	2.47514	Dengue	QC	NaN	NaN	NaN	57.1777	0.134978
Dengue / QC	_GEC[Carbamidomethyl (C)]QAEGVLFFQGDR_	P02790	0.895905	0.895905	3.91028e-13	2.52284e-12	96	P02790	HPX	Hemopexin	HEMO_HUMAN	1	86.0776	1.86078	Dengue	QC	NaN	NaN	NaN	74.1247	0.0955177
Dengue / QC	_FDEFFSEGC[Carbamidomethyl (C)]APGSKKDSSLC[Carbamidomethyl (C)]K_	P02787	2.40857	2.40857	3.97154e-13	2.55963e-12	60	P02787	TF	Serotransferrin	TRFE_HUMAN	1	430.949	5.30949	Dengue	QC	NaN	NaN	NaN	41.8917	0.204113
Dengue / QC	_SLWNGDTGEC[Carbamidomethyl (C)]TDNAYIDIQLR_	P01042	1.02349	1.02349	4.0661e-13	2.61498e-12	136	P01042	KNG1	Kininogen-1	KNG1_HUMAN	1	103.282	2.03282	Dengue	QC	NaN	NaN	NaN	43.6875	0.102965
Dengue / QC	_FATTFYQHLADSKNDNDNIFLSPLSISTAFAMTK_	P01008	0.928529	0.928529	4.2999e-13	2.76238e-12	104	P01008	SERPINC1	Antithrombin-III	ANT3_HUMAN	1	90.3335	1.90333	Dengue	QC	NaN	NaN	NaN	75.52	0.123706
Dengue / QC	_LDGSVDFKK_	P02679;P02679-2	3.15591	3.15591	4.3434e-13	2.7844e-12	24	P02679;P02679-2	FGG	Fibrinogen gamma chain;Isoform Gamma-A of Fibrinogen gamma chain	FIBG_HUMAN	1	791.302	8.91302	Dengue	QC	NaN	NaN	NaN	19.1983	0.158569
Dengue / QC	_ELLALIQLER_	Q16610	0.864323	0.864323	4.65122e-13	2.97224e-12	166	Q16610	ECM1	Extracellular matrix protein 1	ECM1_HUMAN	1	82.0485	1.82048	Dengue	QC	NaN	NaN	NaN	141.614	0.0975295
Dengue / QC	_LGPLVEQGRVR_	P02649	1.55677	1.55677	5.01341e-13	3.18679e-12	58	P02649	APOE	Apolipoprotein E	APOE_HUMAN	1	194.194	2.94194	Dengue	QC	NaN	NaN	NaN	51.4364	0.182796
Dengue / QC	_DLLYIGK_	B4E1Z4	1.03171	1.03171	5.09914e-13	3.23106e-12	56	B4E1Z4	NaN	cDNA FLJ55673, highly similar to Complement factor B (EC 3.4.21.47)	B4E1Z4_HUMAN	1	104.444	2.04444	Dengue	QC	NaN	NaN	NaN	34.9935	0.108874
Dengue / QC	_LFAC[Carbamidomethyl (C)]SNK_	P06396	0.953101	0.953101	5.58143e-13	3.52185e-12	116	P06396	GSN	Gelsolin	GELS_HUMAN	1	93.6029	1.93603	Dengue	QC	NaN	NaN	NaN	106.036	0.116371
Dengue / QC	_NPDGDVGGPWC[Carbamidomethyl (C)]YTTNPRK_	P00747	1.68038	1.68038	5.80639e-13	3.65812e-12	60	P00747	PLG	Plasminogen	PLMN_HUMAN	1	220.512	3.20512	Dengue	QC	NaN	NaN	NaN	52.3849	0.183376
Dengue / QC	_C[Carbamidomethyl (C)]STSSLLEAC[Carbamidomethyl (C)]TFRRP_	P02787	3.48028	3.48028	6.10444e-13	3.8358e-12	110	P02787	TF	Serotransferrin	TRFE_HUMAN	1	1016.01	11.1601	Dengue	QC	NaN	NaN	NaN	75.506	0.354846
Dengue / QC	_QGDVEC[Carbamidomethyl (C)]QR_	P13671	1.06418	1.06418	6.22218e-13	3.90165e-12	98	P13671	C6	Complement component C6	CO6_HUMAN	1	109.098	2.09098	Dengue	QC	NaN	NaN	NaN	32.8455	0.131371
Dengue / QC	_TC[Carbamidomethyl (C)]QDINEC[Carbamidomethyl (C)]ETTNEC[Carbamidomethyl (C)]REDEMC[Carbamidomethyl (C)]WNYHGGFR_	Q12805;Q12805-2;Q12805-4	2.41777	2.41777	6.68496e-13	4.18314e-12	32	Q12805;Q12805-2;Q12805-4	EFEMP1	EGF-containing fibulin-like extracellular matrix protein 1;Isoform 2 of EGF-containing fibulin-like extracellular matrix protein 1;Isoform 4 of EGF-containing fibulin-like extracellular matrix protein 1	FBLN3_HUMAN	1	434.344	5.34344	Dengue	QC	NaN	NaN	NaN	23.0463	0.173071
Dengue / QC	_NPDPVAAPYC[Carbamidomethyl (C)]YTRDPSVR_	P08519	2.3348	2.3348	9.9207e-13	6.0816e-12	38	P08519	LPA	Apolipoprotein(a)	APOA_HUMAN	1	404.48	5.0448	Dengue	QC	NaN	NaN	NaN	31.3198	0.261235
Dengue / QC	_GLEWLGR_	A0A0B4J1U7	-1.30635	1.30635	9.95736e-13	6.09787e-12	176	A0A0B4J1U7	IGHV6-1	Immunoglobulin heavy variable 6-1	HV601_HUMAN	1	-59.5658	0.404342	Dengue	QC	NaN	NaN	NaN	50.2447	0.136402
Dengue / QC	_LWAYLTIQQLLEQTVSASDADQQALR_	Q14624	1.13701	1.13701	1.00128e-12	6.12557e-12	70	Q14624	ITIH4	Inter-alpha-trypsin inhibitor heavy chain H4	ITIH4_HUMAN	1	119.925	2.19925	Dengue	QC	NaN	NaN	NaN	31.5241	0.11544
Dengue / QC	_MDYKGDATVFFILPNQGK_	P29622	0.551596	0.551596	1.05514e-12	6.41601e-12	142	P29622	SERPINA4	Kallistatin	KAIN_HUMAN	1	46.5707	1.46571	Dengue	QC	NaN	NaN	NaN	75.3521	0.073725
Dengue / QC	_QGENGQMMSC[Carbamidomethyl (C)]TC[Carbamidomethyl (C)]LGNGKGEFK_	P02751;P02751-15;P02751-3;P02751-7	1.49402	1.49402	1.1099e-12	6.72864e-12	40	P02751;P02751-15;P02751-3;P02751-7	FN1	Fibronectin;Isoform 15 of Fibronectin;Isoform 3 of Fibronectin;Isoform 7 of Fibronectin	FINC_HUMAN	1	181.673	2.81673	Dengue	QC	NaN	NaN	NaN	28.0827	0.123201
Dengue / QC	_VINLPLDSMAAPWETGDTFPDVVAIAPDVR_	Q96PD5	0.755531	0.755531	1.11445e-12	6.74941e-12	140	Q96PD5	PGLYRP2	N-acetylmuramoyl-L-alanine amidase	PGRP2_HUMAN	1	68.8252	1.68825	Dengue	QC	NaN	NaN	NaN	124.598	0.0851716
Dengue / QC	_QGDVEC[Carbamidomethyl (C)]QRTEC[Carbamidomethyl (C)]IKPVVQEVLTITPFQR_	P13671	3.10777	3.10777	1.15702e-12	6.98713e-12	46	P13671	C6	Complement component C6	CO6_HUMAN	1	762.052	8.62052	Dengue	QC	NaN	NaN	NaN	29.9632	0.272618
Dengue / QC	_WDPYKQGFGNVATNTDGKNYC[Carbamidomethyl (C)]GLPGEYWLGNDK_	P02675	3.30483	3.30483	1.15718e-12	6.98713e-12	26	P02675	FGB	Fibrinogen beta chain	FIBB_HUMAN	1	888.221	9.88221	Dengue	QC	NaN	NaN	NaN	16.618	0.153757
Dengue / QC	_LC[Carbamidomethyl (C)]NNPTPQFGGK_	P07996	1.24978	1.24978	1.22041e-12	7.33952e-12	32	P07996	THBS1	Thrombospondin-1	TSP1_HUMAN	1	137.806	2.37806	Dengue	QC	NaN	NaN	NaN	17.8679	0.0871645
Dengue / QC	_ENPAVIDFELAPIVDLVR_	P13671	0.742946	0.742946	1.2243e-12	7.35557e-12	142	P13671	C6	Complement component C6	CO6_HUMAN	1	67.359	1.67359	Dengue	QC	NaN	NaN	NaN	136.831	0.0980377
Dengue / QC	_LKAKLPDATPTELAK_	D6RF35	1.35485	1.35485	1.38912e-12	8.30441e-12	86	D6RF35	GC	Vitamin D-binding protein	D6RF35_HUMAN	1	155.771	2.55771	Dengue	QC	NaN	NaN	NaN	76.2017	0.132517
Dengue / QC	_HADPDFTRKLWAYLTINQLLAER_	P19823	1.59629	1.59629	1.52092e-12	9.04742e-12	80	P19823	ITIH2	Inter-alpha-trypsin inhibitor heavy chain H2	ITIH2_HUMAN	1	202.365	3.02365	Dengue	QC	NaN	NaN	NaN	49.3569	0.231225
Dengue / QC	_STAAMSTYTGIFTDQVLSVLKGEE_	A0A024R0T9;K7ER74;P02655	0.680156	0.680156	1.53711e-12	9.13476e-12	144	A0A024R0T9;K7ER74;P02655	APOC4-APOC2;APOC4-APOC2;APOC2	Apolipoprotein C-II isoform 1;APOC4-APOC2 readthrough (NMD candidate);Apolipoprotein C-II	A0A024R0T9_HUMAN;K7ER74_HUMAN;APOC2_HUMAN	1	60.2313	1.60231	Dengue	QC	NaN	NaN	NaN	92.8437	0.0771759
Dengue / QC	_GGVASGFKHVVPNEVVVQR_	P06396	1.10844	1.10844	1.67316e-12	9.89446e-12	90	P06396	GSN	Gelsolin	GELS_HUMAN	1	115.612	2.15612	Dengue	QC	NaN	NaN	NaN	66.1492	0.149477
Dengue / QC	_TPENFPC[Carbamidomethyl (C)]KNLDENYC[Carbamidomethyl (C)]R_	P00747	1.82784	1.82784	1.68131e-12	9.9329e-12	56	P00747	PLG	Plasminogen	PLMN_HUMAN	1	255.004	3.55004	Dengue	QC	NaN	NaN	NaN	47.8526	0.182853
Dengue / QC	_VTIMWTPPESAVTGYRVDVIPVNLPGEHGQR_	P02751;P02751-15;P02751-3;P02751-7	0.495377	0.495377	1.68541e-12	9.94738e-12	156	P02751;P02751-15;P02751-3;P02751-7	FN1	Fibronectin;Isoform 15 of Fibronectin;Isoform 3 of Fibronectin;Isoform 7 of Fibronectin	FINC_HUMAN	1	40.9689	1.40969	Dengue	QC	NaN	NaN	NaN	131.487	0.083009
Dengue / QC	_VWVYPPEK_	P02790	1.1993	1.1993	1.78589e-12	1.05095e-11	78	P02790	HPX	Hemopexin	HEMO_HUMAN	1	129.628	2.29628	Dengue	QC	NaN	NaN	NaN	71.0421	0.150276
Dengue / QC	_VELEDWNGRTSTADYAMFK_	P02679;P02679-2	3.43361	3.43361	1.79208e-12	1.05357e-11	24	P02679;P02679-2	FGG	Fibrinogen gamma chain;Isoform Gamma-A of Fibrinogen gamma chain	FIBG_HUMAN	1	980.485	10.8048	Dengue	QC	NaN	NaN	NaN	18.4956	0.174863
Dengue / QC	_C[Carbamidomethyl (C)]C[Carbamidomethyl (C)]VEC[Carbamidomethyl (C)]PPC[Carbamidomethyl (C)]PAPPVAGPSVFLFPPKPKDTLM[Oxidation (M)]ISR_	P01859	4.93155	4.93155	1.95535e-12	1.14176e-11	24	P01859	IGHG2	Immunoglobulin heavy constant gamma 2	IGHG2_HUMAN	1	2951.72	30.5172	Dengue	QC	NaN	NaN	NaN	15.6277	0.228256
Dengue / QC	_IKKWLTFSLGK_	P11226	1.25678	1.25678	2.08972e-12	1.21434e-11	58	P11226	MBL2	Mannose-binding protein C	MBL2_HUMAN	1	138.962	2.38962	Dengue	QC	NaN	NaN	NaN	53.2612	0.141779
Dengue / QC	_NVVFVIDKSGSMSGRK_	Q14624	1.42117	1.42117	2.13108e-12	1.23598e-11	72	Q14624	ITIH4	Inter-alpha-trypsin inhibitor heavy chain H4	ITIH4_HUMAN	1	167.802	2.67802	Dengue	QC	NaN	NaN	NaN	58.7917	0.16977
Dengue / QC	_M[Oxidation (M)]YYSAVEPTKDIFTGLIGPMK_	E9PFZ2	1.00047	1.00047	2.28409e-12	1.32091e-11	94	E9PFZ2	CP	Ceruloplasmin	E9PFZ2_HUMAN	1	100.065	2.00065	Dengue	QC	NaN	NaN	NaN	77.5784	0.220866
Dengue / QC	_EVTKEVVTSEDGSDC[Carbamidomethyl (C)]PEAM[Oxidation (M)]DLGTLSGIGTLDGFR_	P02671	4.12912	4.12912	2.28721e-12	1.32145e-11	112	P02671	FGA	Fibrinogen alpha chain	FIBA_HUMAN	1	1649.8	17.498	Dengue	QC	NaN	NaN	NaN	89.0652	0.369988
Dengue / QC	_LPSGLPVSLLTLYLDNNKISNIPDEYFK_	P51884	0.743449	0.743449	2.34204e-12	1.35054e-11	36	P51884	LUM	Lumican	LUM_HUMAN	1	67.4173	1.67417	Dengue	QC	NaN	NaN	NaN	31.0481	0.113527
Dengue / QC	_TLQGIPQMIGEVIR_	P04114	0.949668	0.949668	2.36913e-12	1.36485e-11	72	P04114	APOB	Apolipoprotein B-100	APOB_HUMAN	1	93.1429	1.93143	Dengue	QC	NaN	NaN	NaN	56.8694	0.126126
Dengue / QC	_YFKPGMPFDLM[Oxidation (M)]VFVTNPDGSPAYRVPVAVQGEDTVQSLTQGDGVAK_	P01024	0.710265	0.710265	2.40195e-12	1.38112e-11	94	P01024	C3	Complement C3	CO3_HUMAN	1	63.6105	1.6361	Dengue	QC	NaN	NaN	NaN	47.5511	0.224252
Dengue / QC	_QDGSVDFGR_	P02675	3.18921	3.18921	2.4743e-12	1.42001e-11	142	P02675	FGB	Fibrinogen beta chain	FIBB_HUMAN	1	812.112	9.12112	Dengue	QC	NaN	NaN	NaN	109.182	0.366218
Dengue / QC	_GFYPSDIAVEWESSGQPENNYNTTPPMLDSDGSFFLYSK_	P01860	1.7636	1.7636	2.49544e-12	1.42942e-11	44	P01860	IGHG3	Immunoglobulin heavy constant gamma 3	IGHG3_HUMAN	1	239.543	3.39543	Dengue	QC	NaN	NaN	NaN	30.1013	0.216438
Dengue / QC	_NNNEKDMALTAFVLISLQEAKDIC[Carbamidomethyl (C)]EEQVNSLPGSITK_	P01024	0.935039	0.935039	2.82209e-12	1.60888e-11	172	P01024	C3	Complement C3	CO3_HUMAN	1	91.1942	1.91194	Dengue	QC	NaN	NaN	NaN	117.979	0.103058
Dengue / QC	_WDPYKQGFGNVATNTDGK_	P02675	2.06331	2.06331	2.82805e-12	1.61076e-11	36	P02675	FGB	Fibrinogen beta chain	FIBB_HUMAN	1	317.944	4.17944	Dengue	QC	NaN	NaN	NaN	31.4294	0.171876
Dengue / QC	_HTASAWLM[Oxidation (M)]SAPNSGPHNR_	Q96PD5	0.310036	0.310036	2.94603e-12	1.67164e-11	40	Q96PD5	PGLYRP2	N-acetylmuramoyl-L-alanine amidase	PGRP2_HUMAN	1	23.9739	1.23974	Dengue	QC	NaN	NaN	NaN	14.6854	0.315127
Dengue / QC	_EC[Carbamidomethyl (C)]EEIIRK_	P02675	5.87638	5.87638	2.98884e-12	1.69274e-11	28	P02675	FGB	Fibrinogen beta chain	FIBB_HUMAN	1	5774.45	58.7445	Dengue	QC	NaN	NaN	NaN	18.7305	0.288169
Dengue / QC	_RLWWLDLKSGAQATWTELPWPHEK_	P02790	0.995683	0.995683	3.10081e-12	1.75451e-11	166	P02790	HPX	Hemopexin	HEMO_HUMAN	1	99.4024	1.99402	Dengue	QC	NaN	NaN	NaN	156.441	0.112858
Dengue / QC	_LKC[Carbamidomethyl (C)]QPVDC[Carbamidomethyl (C)]GIPESIENGKVEDPESTLFGSVIR_	P09871	1.896	1.896	3.1166e-12	1.76179e-11	58	P09871	C1S	Complement C1s subcomponent	C1S_HUMAN	1	272.179	3.72179	Dengue	QC	NaN	NaN	NaN	44.699	0.211271
Dengue / QC	_AKLPDATPK_	P02774;P02774-3	1.47457	1.47457	3.15626e-12	1.78253e-11	58	P02774;P02774-3	GC	Vitamin D-binding protein;Isoform 3 of Vitamin D-binding protein	VTDB_HUMAN	1	177.901	2.77901	Dengue	QC	NaN	NaN	NaN	36.7117	0.155611
Dengue / QC	_SMGGKEDLIWELLNQAQEHFGK_	P02787	0.966458	0.966458	3.20968e-12	1.811e-11	172	P02787	TF	Serotransferrin	TRFE_HUMAN	1	95.4038	1.95404	Dengue	QC	NaN	NaN	NaN	116.12	0.153367
Dengue / QC	_VRAATVGSLAGQPLQER_	P02649	0.72371	0.72371	3.28672e-12	1.85274e-11	80	P02649	APOE	Apolipoprotein E	APOE_HUMAN	1	65.1423	1.65142	Dengue	QC	NaN	NaN	NaN	70.5651	0.124522
Dengue / QC	_WERPFEVKDTEEEDFHVDQVTTVK_	P01009	1.07669	1.07669	3.30655e-12	1.86044e-11	92	P01009	SERPINA1	Alpha-1-antitrypsin	A1AT_HUMAN	1	110.919	2.10919	Dengue	QC	NaN	NaN	NaN	80.0639	0.11424
Dengue / QC	_SGKFTC[Carbamidomethyl (C)]KVPGLYYFTYHASSR_	D6R934;P02746	1.8954	1.8954	3.75193e-12	2.0915e-11	84	D6R934;P02746	C1QB	Complement C1q subcomponent subunit B	D6R934_HUMAN;C1QB_HUMAN	1	272.024	3.72024	Dengue	QC	NaN	NaN	NaN	64.8642	0.205588
Dengue / QC	_SETKDLLFRDDTVC[Carbamidomethyl (C)]LAK_	P02787	0.766188	0.766188	3.85973e-12	2.14564e-11	174	P02787	TF	Serotransferrin	TRFE_HUMAN	1	70.077	1.70077	Dengue	QC	NaN	NaN	NaN	129.906	0.0764779
Dengue / QC	_LIVVEYR_	Q9NPH3-5	0.449575	0.449575	4.07709e-12	2.25606e-11	86	Q9NPH3-5	IL1RAP	Isoform 4 of Interleukin-1 receptor accessory protein	IL1AP_HUMAN	1	36.5638	1.36564	Dengue	QC	NaN	NaN	NaN	57.5583	0.297208
Dengue / QC	_NQVVIAAGR_	P80108	0.671735	0.671735	4.07124e-12	2.25606e-11	154	P80108	GPLD1	Phosphatidylinositol-glycan-specific phospholipase D	PHLD_HUMAN	1	59.2987	1.59299	Dengue	QC	NaN	NaN	NaN	86.0784	0.0691862
Dengue / QC	_VAC[Carbamidomethyl (C)]EEPPFIENGAANLHSK_	P05160	0.560279	0.560279	4.18017e-12	2.31098e-11	90	P05160	F13B	Coagulation factor XIII B chain	F13B_HUMAN	1	47.4554	1.47455	Dengue	QC	NaN	NaN	NaN	58.2431	0.0701982
Dengue / QC	_GSFAC[Carbamidomethyl (C)]QC[Carbamidomethyl (C)]PPGYQK_	Q12805;Q12805-2;Q12805-4	1.1725	1.1725	4.35292e-12	2.39768e-11	52	Q12805;Q12805-2;Q12805-4	EFEMP1	EGF-containing fibulin-like extracellular matrix protein 1;Isoform 2 of EGF-containing fibulin-like extracellular matrix protein 1;Isoform 4 of EGF-containing fibulin-like extracellular matrix protein 1	FBLN3_HUMAN	1	125.402	2.25402	Dengue	QC	NaN	NaN	NaN	41.7956	0.144334
Dengue / QC	_MGPTELLIEMEDWKGDKVK_	P02675	4.60952	4.60952	4.51858e-12	2.48666e-11	54	P02675	FGB	Fibrinogen beta chain	FIBB_HUMAN	1	2341.21	24.4121	Dengue	QC	NaN	NaN	NaN	34.0088	0.357076
Dengue / QC	_NIPTVNENLENYYLEVNQLEKFDIK_	P51884	0.993121	0.993121	4.73144e-12	2.58961e-11	96	P51884	LUM	Lumican	LUM_HUMAN	1	99.0487	1.99049	Dengue	QC	NaN	NaN	NaN	70.198	0.111497
Dengue / QC	_LTVDKSRWQQGNVFSC[Carbamidomethyl (C)]SVMHEALHNHYTQK_	P01857	2.18805	2.18805	4.84669e-12	2.64456e-11	130	P01857	IGHG1	Immunoglobulin heavy constant gamma 1	IGHG1_HUMAN	1	355.69	4.5569	Dengue	QC	NaN	NaN	NaN	109.267	0.342828
Dengue / QC	_YEASILTHDSSIR_	P02679;P02679-2	2.2863	2.2863	4.84939e-12	2.64456e-11	78	P02679;P02679-2	FGG	Fibrinogen gamma chain;Isoform Gamma-A of Fibrinogen gamma chain	FIBG_HUMAN	1	387.805	4.87805	Dengue	QC	NaN	NaN	NaN	49.3018	0.215945
Dengue / QC	_LGNWSAMPSC[Carbamidomethyl (C)]K_	P02749	1.53285	1.53285	5.15207e-12	2.79643e-11	64	P02749	APOH	Beta-2-glycoprotein 1	APOH_HUMAN	1	189.356	2.89356	Dengue	QC	NaN	NaN	NaN	37.1258	0.133796
Dengue / QC	_RIFSPFADLSELSATGR_	G3V2W1;Q9UK55	1.10683	1.10683	5.30681e-12	2.87321e-11	40	G3V2W1;Q9UK55	SERPINA10	Protein Z-dependent protease inhibitor	G3V2W1_HUMAN;ZPI_HUMAN	1	115.371	2.15371	Dengue	QC	NaN	NaN	NaN	34.6072	0.0919291
Dengue / QC	_GLPAPIEKTISK_	P01859	3.82154	3.82154	5.45284e-12	2.94698e-11	70	P01859	IGHG2	Immunoglobulin heavy constant gamma 2	IGHG2_HUMAN	1	1313.83	14.1383	Dengue	QC	NaN	NaN	NaN	41.6544	0.38019
Dengue / QC	_ILSVKGLLVGEILSAVLSQEGINILTHLPK_	P01031	1.61162	1.61162	5.55671e-12	2.99774e-11	64	P01031	C5	Complement C5	CO5_HUMAN	1	205.595	3.05595	Dengue	QC	NaN	NaN	NaN	56.8568	0.164528
Dengue / QC	_GGSTSYGTGSETESPRNPSSAGSWNSGSSGPGSTGNR_	P02671	2.66344	2.66344	5.71153e-12	3.07575e-11	86	P02671	FGA	Fibrinogen alpha chain	FIBA_HUMAN	1	533.543	6.33543	Dengue	QC	NaN	NaN	NaN	64.6908	0.290155
Dengue / QC	_NIQEYLSILTDPDGKGK_	P04114	0.525947	0.525947	5.74135e-12	3.08888e-11	42	P04114	APOB	Apolipoprotein B-100	APOB_HUMAN	1	43.9879	1.43988	Dengue	QC	NaN	NaN	NaN	24.9524	0.0968323
Dengue / QC	_NTEQEEGGEAVHEVEVVIK_	P00742	0.514081	0.514081	5.79977e-12	3.11492e-11	112	P00742	F10	Coagulation factor X	FA10_HUMAN	1	42.8084	1.42808	Dengue	QC	NaN	NaN	NaN	104.464	0.0740416
Dengue / QC	_C[Carbamidomethyl (C)]VNSPGSFR_	P23142	1.17397	1.17397	5.88383e-12	3.1552e-11	80	P23142	FBLN1	Fibulin-1	FBLN1_HUMAN	1	125.632	2.25632	Dengue	QC	NaN	NaN	NaN	72.6241	0.152812
Dengue / QC	_LTVAAPPSGGPGFLSIEWPDSRPPR_	A0A140TA49	12.1594	12.1594	5.96323e-12	3.19417e-11	24	A0A140TA49	C4A	Complement C4-A	A0A140TA49_HUMAN	1	457343	4574.43	Dengue	QC	NaN	NaN	NaN	12.0997	0.255432
Dengue / QC	_RVELKTPLGDTTHTC[Carbamidomethyl (C)]PR_	P01860	3.56673	3.56673	6.08905e-12	3.25578e-11	70	P01860	IGHG3	Immunoglobulin heavy constant gamma 3	IGHG3_HUMAN	1	1084.93	11.8493	Dengue	QC	NaN	NaN	NaN	44.7439	0.368592
Dengue / QC	_KWQEEM[Oxidation (M)]ELYR_	P02647	0.682067	0.682067	6.51452e-12	3.46177e-11	112	P02647	APOA1	Apolipoprotein A-I	APOA1_HUMAN	1	60.4437	1.60444	Dengue	QC	NaN	NaN	NaN	82.929	0.0742026
Dengue / QC	_LKHLIVTPSGC[Carbamidomethyl (C)]GEQNMIGMTPTVIAVHYLDETEQWEK_	P01024	0.606691	0.606691	6.77715e-12	3.59499e-11	154	P01024	C3	Complement C3	CO3_HUMAN	1	52.2762	1.52276	Dengue	QC	NaN	NaN	NaN	74.029	0.0728605
Dengue / QC	_NTDNIIYPEEYSSC[Carbamidomethyl (C)]SR_	Q13201	0.593554	0.593554	6.80876e-12	3.60858e-11	30	Q13201	MMRN1	Multimerin-1	MMRN1_HUMAN	1	50.896	1.50896	Dengue	QC	NaN	NaN	NaN	11.5249	0.220399
Dengue / QC	_C[Carbamidomethyl (C)]HAGHLNGVYYQGGTYSK_	P02679;P02679-2	2.65979	2.65979	7.02656e-12	3.71421e-11	42	P02679;P02679-2	FGG	Fibrinogen gamma chain;Isoform Gamma-A of Fibrinogen gamma chain	FIBG_HUMAN	1	531.942	6.31942	Dengue	QC	NaN	NaN	NaN	34.2978	0.211886
Dengue / QC	_APQLRETLLQDFR_	P02760	1.56872	1.56872	7.1252e-12	3.75647e-11	62	P02760	AMBP	Protein AMBP	AMBP_HUMAN	1	196.642	2.96642	Dengue	QC	NaN	NaN	NaN	49.4852	0.151509
Dengue / QC	_IRPFFPQQ_	P02675	3.00137	3.00137	7.26136e-12	3.82491e-11	152	P02675	FGB	Fibrinogen beta chain	FIBB_HUMAN	1	700.759	8.00759	Dengue	QC	NaN	NaN	NaN	120.822	0.362842
Dengue / QC	_LLATLC[Carbamidomethyl (C)]SAEVC[Carbamidomethyl (C)]QC[Carbamidomethyl (C)]AEGKC[Carbamidomethyl (C)]PR_	P0C0L5	3.07686	3.07686	7.4066e-12	3.89801e-11	100	P0C0L5	C4B	Complement C4-B	CO4B_HUMAN	1	743.775	8.43775	Dengue	QC	NaN	NaN	NaN	69.4729	0.353689
Dengue / QC	_IDQTVEELR_	P06727	1.61456	1.61456	7.8374e-12	4.12113e-11	82	P06727	APOA4	Apolipoprotein A-IV	APOA4_HUMAN	1	206.219	3.06219	Dengue	QC	NaN	NaN	NaN	66.463	0.162616
Dengue / QC	_YLFPGEC[Carbamidomethyl (C)]QYVLVQDYC[Carbamidomethyl (C)]GSNPGTFR_	P04275	1.36321	1.36321	7.94823e-12	4.1685e-11	82	P04275	VWF	von Willebrand factor	VWF_HUMAN	1	157.257	2.57257	Dengue	QC	NaN	NaN	NaN	72.3724	0.181549
Dengue / QC	_ALVDTLKFVTQAEGAK_	P04114	1.64625	1.64625	7.94243e-12	4.1685e-11	94	P04114	APOB	Apolipoprotein B-100	APOB_HUMAN	1	213.018	3.13018	Dengue	QC	NaN	NaN	NaN	74.6672	0.181291
Dengue / QC	_C[Carbamidomethyl (C)]FSSDFMAYDIAC[Carbamidomethyl (C)]DR_	O75882;O75882-2	0.647493	0.647493	8.43658e-12	4.40545e-11	50	O75882;O75882-2	ATRN	Attractin;Isoform 2 of Attractin	ATRN_HUMAN	1	56.6444	1.56644	Dengue	QC	NaN	NaN	NaN	31.8958	0.103686
Dengue / QC	_TVMVNIENPEGIPVKQDSLSSQNQLGVLPLSWDIPELVNM[Oxidation (M)]GQWK_	P01024	0.638269	0.638269	8.61457e-12	4.4906e-11	160	P01024	C3	Complement C3	CO3_HUMAN	1	55.646	1.55646	Dengue	QC	NaN	NaN	NaN	75.5316	0.0939454
Dengue / QC	_C[Carbamidomethyl (C)]LPVTAPENGKIVSSAMEPDREYHFGQAVR_	P08603	2.43749	2.43749	8.78269e-12	4.57033e-11	74	P08603	CFH	Complement factor H	CFAH_HUMAN	1	441.699	5.41699	Dengue	QC	NaN	NaN	NaN	47.73	0.301527
Dengue / QC	_GIETGSEDLEILPNGLAFISSGLK_	P27169	0.752357	0.752357	8.91058e-12	4.63289e-11	168	P27169	PON1	Serum paraoxonase/arylesterase 1	PON1_HUMAN	1	68.4543	1.68454	Dengue	QC	NaN	NaN	NaN	95.5409	0.0871643
Dengue / QC	_SDLGC[Carbamidomethyl (C)]GAGGGLNNANVFHLAGLTFLTNANADDSQENDEPC[Carbamidomethyl (C)]KEILRPR_	P01031	0.669902	0.669902	8.95636e-12	4.65267e-11	68	P01031	C5	Complement C5	CO5_HUMAN	1	59.0965	1.59096	Dengue	QC	NaN	NaN	NaN	61.7615	0.0822507
Dengue / QC	_TLADLTLLDSPIK_	P04114	0.516294	0.516294	9.01819e-12	4.68076e-11	134	P04114	APOB	Apolipoprotein B-100	APOB_HUMAN	1	43.0276	1.43028	Dengue	QC	NaN	NaN	NaN	96.8209	0.0737801
Dengue / QC	_VELEDWNGR_	P02679;P02679-2	2.74879	2.74879	9.32433e-12	4.82718e-11	122	P02679;P02679-2	FGG	Fibrinogen gamma chain;Isoform Gamma-A of Fibrinogen gamma chain	FIBG_HUMAN	1	572.155	6.72155	Dengue	QC	NaN	NaN	NaN	88.1485	0.318342
Dengue / QC	_C[Carbamidomethyl (C)]VLFPYGGC[Carbamidomethyl (C)]QGNGNKFYSEKEC[Carbamidomethyl (C)]R_	P02760	2.46023	2.46023	9.32376e-12	4.82718e-11	34	P02760	AMBP	Protein AMBP	AMBP_HUMAN	1	450.303	5.50303	Dengue	QC	NaN	NaN	NaN	26.0131	0.231536
Dengue / QC	_HLIVTPSGC[Carbamidomethyl (C)]GEQNMIGMTPTVIAVHYLDETEQWEKFGLEKR_	P01024	0.734662	0.734662	9.55083e-12	4.93596e-11	112	P01024	C3	Complement C3	CO3_HUMAN	1	66.4007	1.66401	Dengue	QC	NaN	NaN	NaN	61.8755	0.0916695
Dengue / QC	_VFLDC[Carbamidomethyl (C)]C[Carbamidomethyl (C)]NYITELR_	P01024	0.799144	0.799144	9.93037e-12	5.12332e-11	112	P01024	C3	Complement C3	CO3_HUMAN	1	74.0068	1.74007	Dengue	QC	NaN	NaN	NaN	95.2932	0.115307
Dengue / QC	_VGLSGMAIADVTLLSGFHALRADLEK_	P0C0L5	0.86156	0.86156	9.94019e-12	5.124e-11	50	P0C0L5	C4B	Complement C4-B	CO4B_HUMAN	1	81.7001	1.817	Dengue	QC	NaN	NaN	NaN	27.7527	0.214223
Dengue / QC	_SRLSSGLVTAALYGR_	P43251;P43251-2;P43251-3;P43251-4	0.536916	0.536916	1.01953e-11	5.25104e-11	124	P43251;P43251-2;P43251-3;P43251-4	BTD	Biotinidase;Isoform 2 of Biotinidase;Isoform 3 of Biotinidase;Isoform 4 of Biotinidase	BTD_HUMAN	1	45.0868	1.45087	Dengue	QC	NaN	NaN	NaN	103.558	0.12177
Dengue / QC	_HATKTAKDALSSVQESQVAQQAR_	B0YIW2;P02656	1.50035	1.50035	1.16744e-11	5.9669e-11	72	B0YIW2;P02656	APOC3	Apolipoprotein C-III	B0YIW2_HUMAN;APOC3_HUMAN	1	182.911	2.82911	Dengue	QC	NaN	NaN	NaN	66.5804	0.164971
Dengue / QC	_VSVFVPPR_	P01871	-0.665142	0.665142	1.2256e-11	6.24829e-11	176	P01871	IGHM	Immunoglobulin heavy constant mu	IGHM_HUMAN	1	-36.9373	0.630627	Dengue	QC	NaN	NaN	NaN	92.6948	0.0865561
Dengue / QC	_ESDWLGQSM[Oxidation (M)]FTC[Carbamidomethyl (C)]R_	P01871	1.1611	1.1611	1.22865e-11	6.25852e-11	48	P01871	IGHM	Immunoglobulin heavy constant mu	IGHM_HUMAN	1	123.628	2.23628	Dengue	QC	NaN	NaN	NaN	33.7144	0.140088
Dengue / QC	_GRFIISR_	A0A0C4DH35	1.47497	1.47497	1.26953e-11	6.44495e-11	124	A0A0C4DH35	IGHV3-35	Immunoglobulin heavy variable 3-35 (non-functional) (Fragment)	A0A0C4DH35_HUMAN	1	177.977	2.77977	Dengue	QC	NaN	NaN	NaN	119.741	0.189784
Dengue / QC	_SFYFPMSIDK_	P05160	1.31031	1.31031	1.34385e-11	6.81079e-11	44	P05160	F13B	Coagulation factor XIII B chain	F13B_HUMAN	1	147.995	2.47995	Dengue	QC	NaN	NaN	NaN	31.7882	0.137019
Dengue / QC	_NYAEAKDVFLGMFLYEYARR_	P02768	1.52832	1.52832	1.37103e-11	6.93689e-11	68	P02768	ALB	Serum albumin	ALBU_HUMAN	1	188.45	2.8845	Dengue	QC	NaN	NaN	NaN	49.6192	0.152517
Dengue / QC	_FGMHFC[Carbamidomethyl (C)]GGTLISPEWVLTAAHC[Carbamidomethyl (C)]LEK_	P00747	0.65715	0.65715	1.51374e-11	7.58256e-11	166	P00747	PLG	Plasminogen	PLMN_HUMAN	1	57.6964	1.57696	Dengue	QC	NaN	NaN	NaN	108.924	0.0931956
Dengue / QC	_NYC[Carbamidomethyl (C)]GLPGEYWLGNDK_	P02675	2.33268	2.33268	1.53e-11	7.65763e-11	86	P02675	FGB	Fibrinogen beta chain	FIBB_HUMAN	1	403.739	5.03739	Dengue	QC	NaN	NaN	NaN	67.0066	0.272924
Dengue / QC	_GM[Oxidation (M)]ALFGEGK_	P04114	0.908002	0.908002	1.61051e-11	8.02723e-11	26	P04114	APOB	Apolipoprotein B-100	APOB_HUMAN	1	87.6446	1.87645	Dengue	QC	NaN	NaN	NaN	19.9759	0.160748
Dengue / QC	_SC[Carbamidomethyl (C)]ESNSPFPVHPGTAEC[Carbamidomethyl (C)]C[Carbamidomethyl (C)]TKEGLER_	P02774;P02774-3	2.73413	2.73413	1.62479e-11	8.09171e-11	136	P02774;P02774-3	GC	Vitamin D-binding protein;Isoform 3 of Vitamin D-binding protein	VTDB_HUMAN	1	565.359	6.65359	Dengue	QC	NaN	NaN	NaN	100.781	0.31025
Dengue / QC	_TVMVNIENPEGIPVKQDSLSSQNQLGVLPLSWDIPELVNMGQWK_	P01024	0.934421	0.934421	1.64303e-11	8.17579e-11	172	P01024	C3	Complement C3	CO3_HUMAN	1	91.1124	1.91112	Dengue	QC	NaN	NaN	NaN	82.3843	0.123854
Dengue / QC	_QLVHHFEIDVDIFEPQGISK_	P19827	0.938643	0.938643	1.64585e-11	8.1831e-11	170	P19827	ITIH1	Inter-alpha-trypsin inhibitor heavy chain H1	ITIH1_HUMAN	1	91.6724	1.91672	Dengue	QC	NaN	NaN	NaN	101.324	0.0955866
Dengue / QC	_IDQNVEELK_	P06727	0.452584	0.452584	1.66096e-11	8.25142e-11	158	P06727	APOA4	Apolipoprotein A-IV	APOA4_HUMAN	1	36.8489	1.36849	Dengue	QC	NaN	NaN	NaN	149.782	0.070929
Dengue / QC	_C[Carbamidomethyl (C)]QIAGWGHLDENVSGYSSSLR_	Q04756	0.574249	0.574249	1.70888e-11	8.48244e-11	110	Q04756	HGFAC	Hepatocyte growth factor activator	HGFA_HUMAN	1	48.8902	1.4889	Dengue	QC	NaN	NaN	NaN	81.3968	0.0728
Dengue / QC	_NTVLVLNTQSLVFVQTDKPMYKPGQTVR_	P20742	3.04465	3.04465	1.75844e-11	8.70694e-11	48	P20742	PZP	Pregnancy zone protein	PZP_HUMAN	1	725.149	8.25149	Dengue	QC	NaN	NaN	NaN	34.772	0.299082
Dengue / QC	_DRQHLPLIK_	P02671	2.15923	2.15923	1.77123e-11	8.76308e-11	36	P02671	FGA	Fibrinogen alpha chain	FIBA_HUMAN	1	346.675	4.46675	Dengue	QC	NaN	NaN	NaN	30.8712	0.182582
Dengue / QC	_TILGTMPAFEVSLQALQK_	P04114	0.950951	0.950951	1.77311e-11	8.76521e-11	14	P04114	APOB	Apolipoprotein B-100	APOB_HUMAN	1	93.3146	1.93315	Dengue	QC	NaN	NaN	NaN	8.73247	0.117721
Dengue / QC	_ERRLDYQEGPPGVEISC[Carbamidomethyl (C)]WSVEL_	Q14624	2.84215	2.84215	1.88494e-11	9.30274e-11	36	Q14624	ITIH4	Inter-alpha-trypsin inhibitor heavy chain H4	ITIH4_HUMAN	1	617.086	7.17086	Dengue	QC	NaN	NaN	NaN	27.8854	0.269511
Dengue / QC	_SIAAATSALVK_	Q9Y490	1.28786	1.28786	1.88868e-11	9.31355e-11	34	Q9Y490	TLN1	Talin-1	TLN1_HUMAN	1	144.166	2.44166	Dengue	QC	NaN	NaN	NaN	28.8823	0.161858
Dengue / QC	_C[Carbamidomethyl (C)]LPTAC[Carbamidomethyl (C)]TIQLR_	P04275	1.03723	1.03723	1.94426e-11	9.57982e-11	58	P04275	VWF	von Willebrand factor	VWF_HUMAN	1	105.229	2.05229	Dengue	QC	NaN	NaN	NaN	48.7575	0.148842
Dengue / QC	_NIPTVNENLENYYLEVNQLEK_	P51884	0.720305	0.720305	1.99013e-11	9.78181e-11	126	P51884	LUM	Lumican	LUM_HUMAN	1	64.753	1.64753	Dengue	QC	NaN	NaN	NaN	114.742	0.105663
Dengue / QC	_SLGNVIM[Oxidation (M)]VC[Carbamidomethyl (C)]R_	P08603	1.22835	1.22835	2.02399e-11	9.93205e-11	44	P08603	CFH	Complement factor H	CFAH_HUMAN	1	134.299	2.34299	Dengue	QC	NaN	NaN	NaN	30.6403	0.13704
Dengue / QC	_EDGGGWWYNR_	P02675	2.89026	2.89026	2.16322e-11	1.05498e-10	124	P02675	FGB	Fibrinogen beta chain	FIBB_HUMAN	1	641.402	7.41402	Dengue	QC	NaN	NaN	NaN	91.5835	0.352164
Dengue / QC	_QSSGENC[Carbamidomethyl (C)]DVVVNTLGK_	P01833	1.49597	1.49597	2.16388e-11	1.05498e-10	108	P01833	PIGR	Polymeric immunoglobulin receptor	PIGR_HUMAN	1	182.054	2.82054	Dengue	QC	NaN	NaN	NaN	82.515	0.200447
Dengue / QC	_TEDTIFLR_	P19652	-0.590746	0.590746	2.16661e-11	1.05546e-10	172	P19652	ORM2	Alpha-1-acid glycoprotein 2	A1AG2_HUMAN	1	-33.6	0.664	Dengue	QC	NaN	NaN	NaN	88.4948	0.0803738
Dengue / QC	_SQPM[Oxidation (M)]GLWR_	P25311	1.38982	1.38982	2.26137e-11	1.09895e-10	68	P25311	AZGP1	Zinc-alpha-2-glycoprotein	ZA2G_HUMAN	1	162.047	2.62047	Dengue	QC	NaN	NaN	NaN	53.2066	0.165895
Dengue / QC	_KMEILHPGK_	P13671	2.72674	2.72674	2.2696e-11	1.10206e-10	72	P13671	C6	Complement component C6	CO6_HUMAN	1	561.956	6.61956	Dengue	QC	NaN	NaN	NaN	55.9241	0.315589
Dengue / QC	_ENFVLTTAK_	P22891;P22891-2	0.699668	0.699668	2.27661e-11	1.10458e-10	76	P22891;P22891-2	PROZ	Vitamin K-dependent protein Z;Isoform 2 of Vitamin K-dependent protein Z	PROZ_HUMAN	1	62.4131	1.62413	Dengue	QC	NaN	NaN	NaN	67.9186	0.101739
Dengue / QC	_LGWAMTSADLNQDGHGDLVVGAPGYSRPGHIHIGR_	P80108	0.860564	0.860564	2.30013e-11	1.11419e-10	86	P80108	GPLD1	Phosphatidylinositol-glycan-specific phospholipase D	PHLD_HUMAN	1	81.5748	1.81575	Dengue	QC	NaN	NaN	NaN	35.3361	0.0827327
Dengue / QC	_GSWYSMRK_	P02675	2.96989	2.96989	2.40512e-11	1.16225e-10	46	P02675	FGB	Fibrinogen beta chain	FIBB_HUMAN	1	683.476	7.83476	Dengue	QC	NaN	NaN	NaN	33.799	0.287025
Dengue / QC	_LEEAEKAADESER_	P67936	1.06222	1.06222	2.53753e-11	1.22427e-10	38	P67936	TPM4	Tropomyosin alpha-4 chain	TPM4_HUMAN	1	108.815	2.08815	Dengue	QC	NaN	NaN	NaN	30.1105	0.100616
Dengue / QC	_GDMFLVANLGTK_	P43251;P43251-2;P43251-3;P43251-4	0.836271	0.836271	2.63349e-11	1.26551e-10	66	P43251;P43251-2;P43251-3;P43251-4	BTD	Biotinidase;Isoform 2 of Biotinidase;Isoform 3 of Biotinidase;Isoform 4 of Biotinidase	BTD_HUMAN	1	78.5429	1.78543	Dengue	QC	NaN	NaN	NaN	48.0091	0.100114
Dengue / QC	_SLAPYAQDTQEKLNHQLEGLTFQMK_	P06727	0.848544	0.848544	2.67937e-11	1.28448e-10	122	P06727	APOA4	Apolipoprotein A-IV	APOA4_HUMAN	1	80.0682	1.80068	Dengue	QC	NaN	NaN	NaN	111.019	0.112765
Dengue / QC	_NKC[Carbamidomethyl (C)]YTAVVPLVYGGETK_	P01591	2.76239	2.76239	2.7669e-11	1.32433e-10	70	P01591	JCHAIN	Immunoglobulin J chain	IGJ_HUMAN	1	578.517	6.78517	Dengue	QC	NaN	NaN	NaN	44.4643	0.28706
Dengue / QC	_GLIDEVNQDFTNR_	P02671	2.0855	2.0855	2.95837e-11	1.41038e-10	62	P02671	FGA	Fibrinogen alpha chain	FIBA_HUMAN	1	324.423	4.24423	Dengue	QC	NaN	NaN	NaN	43.2796	0.212707
Dengue / QC	_TTSAKETQSIEK_	Q92954-3	2.34395	2.34395	2.99449e-11	1.42534e-10	40	Q92954-3	PRG4	Isoform C of Proteoglycan 4	PRG4_HUMAN	1	407.691	5.07691	Dengue	QC	NaN	NaN	NaN	34.5574	0.213005
Dengue / QC	_NPDGDPGGPWC[Carbamidomethyl (C)]YTTDPAVR_	G3XAK1;P26927	-0.542282	0.542282	3.02137e-11	1.43587e-10	54	G3XAK1;P26927	MST1	Hepatocyte growth factor-like protein	G3XAK1_HUMAN;HGFL_HUMAN	1	-31.3316	0.686684	Dengue	QC	NaN	NaN	NaN	21.9226	0.159204
Dengue / QC	_LVPPM[Oxidation (M)]EEDYPQFGSPK_	P08697	-0.344195	0.344195	3.0443e-11	1.44562e-10	20	P08697	SERPINF2	Alpha-2-antiplasmin	A2AP_HUMAN	1	-21.2252	0.787748	Dengue	QC	NaN	NaN	NaN	12.8962	0.236974
Dengue / QC	_DFGTHYITEAVLGGIYEYTLVMNK_	P07358	1.18713	1.18713	3.26869e-11	1.54366e-10	58	P07358	C8B	Complement component C8 beta chain	CO8B_HUMAN	1	127.699	2.27699	Dengue	QC	NaN	NaN	NaN	52.0299	0.135963
Dengue / QC	_GEWTC[Carbamidomethyl (C)]KPIAEK_	P02751;P02751-15;P02751-3;P02751-7	0.549636	0.549636	3.3125e-11	1.56068e-10	128	P02751;P02751-15;P02751-3;P02751-7	FN1	Fibronectin;Isoform 15 of Fibronectin;Isoform 3 of Fibronectin;Isoform 7 of Fibronectin	FINC_HUMAN	1	46.3716	1.46372	Dengue	QC	NaN	NaN	NaN	117.815	0.094794
Dengue / QC	_EVGPPLPQEAVPLQK_	Q16610	0.932279	0.932279	3.34314e-11	1.57389e-10	64	Q16610	ECM1	Extracellular matrix protein 1	ECM1_HUMAN	1	90.8289	1.90829	Dengue	QC	NaN	NaN	NaN	55.1771	0.143468
Dengue / QC	_LPQQANDYLNSFNWER_	P04114	0.813254	0.813254	3.47335e-11	1.6301e-10	48	P04114	APOB	Apolipoprotein B-100	APOB_HUMAN	1	75.717	1.75717	Dengue	QC	NaN	NaN	NaN	43.79	0.105764
Dengue / QC	_HGTDDGVVWMNWK_	P02675	3.08454	3.08454	3.4935e-11	1.63827e-10	122	P02675	FGB	Fibrinogen beta chain	FIBB_HUMAN	1	748.279	8.48279	Dengue	QC	NaN	NaN	NaN	90.4332	0.384405
Dengue / QC	_YVTC[Carbamidomethyl (C)]SNGDWSEPPR_	Q92496;Q92496-2	0.67364	0.67364	3.63473e-11	1.70186e-10	54	Q92496;Q92496-2	CFHR4	Complement factor H-related protein 4;Isoform 2 of Complement factor H-related protein 4	FHR4_HUMAN	1	59.5092	1.59509	Dengue	QC	NaN	NaN	NaN	37.209	0.139467
Dengue / QC	_GGETSEM[Oxidation (M)]YLIQPDSSVKPYR_	P02675	4.03669	4.03669	3.72479e-11	1.73894e-10	38	P02675	FGB	Fibrinogen beta chain	FIBB_HUMAN	1	1541.21	16.4121	Dengue	QC	NaN	NaN	NaN	24.9418	0.282225
Dengue / QC	_ANPTVTLFPPSSEELQANKATLVC[Carbamidomethyl (C)]LISDFYPGAVTVAWKADGSPVK_	A0A0B4J231;B9A064	1.81048	1.81048	3.89232e-11	1.81261e-10	76	A0A0B4J231;B9A064	IGLL5	Immunoglobulin lambda-like polypeptide 5	A0A0B4J231_HUMAN;IGLL5_HUMAN	1	250.76	3.5076	Dengue	QC	NaN	NaN	NaN	62.0744	0.270522
Dengue / QC	_VLDAVRGSPAINVAVHVFRK_	P02766	1.2504	1.2504	3.90986e-11	1.81937e-10	98	P02766	TTR	Transthyretin	TTHY_HUMAN	1	137.907	2.37907	Dengue	QC	NaN	NaN	NaN	81.1845	0.14366
Dengue / QC	_FQVDNNNRLLLQQVSLPELPGEYSM[Oxidation (M)]K_	P01023	0.716182	0.716182	4.06657e-11	1.88792e-10	44	P01023	A2M	Alpha-2-macroglobulin	A2MG_HUMAN	1	64.2828	1.64283	Dengue	QC	NaN	NaN	NaN	21.5769	0.453748
Dengue / QC	_LWAYLTINQLLAER_	P19823	1.20985	1.20985	4.11812e-11	1.90891e-10	76	P19823	ITIH2	Inter-alpha-trypsin inhibitor heavy chain H2	ITIH2_HUMAN	1	131.314	2.31314	Dengue	QC	NaN	NaN	NaN	35.2363	0.180829
Dengue / QC	_M[Oxidation (M)]YYSAVEPTKDIFTGLIGPM[Oxidation (M)]K_	E9PFZ2	0.470101	0.470101	4.27177e-11	1.97709e-10	26	E9PFZ2	CP	Ceruloplasmin	E9PFZ2_HUMAN	1	38.5207	1.38521	Dengue	QC	NaN	NaN	NaN	15.3438	0.145454
Dengue / QC	_GQPREPQVYTLPPSQEEMTKNQVSLTC[Carbamidomethyl (C)]LVK_	P01861	1.63877	1.63877	4.28167e-11	1.98015e-10	96	P01861	IGHG4	Immunoglobulin heavy constant gamma 4	IGHG4_HUMAN	1	211.4	3.114	Dengue	QC	NaN	NaN	NaN	85.0237	0.219373
Dengue / QC	_QKTGLDSPTGIDFSDITANSFTVHWIAPR_	P02751;P02751-15;P02751-3;P02751-7	0.835462	0.835462	4.31841e-11	1.99561e-10	106	P02751;P02751-15;P02751-3;P02751-7	FN1	Fibronectin;Isoform 15 of Fibronectin;Isoform 3 of Fibronectin;Isoform 7 of Fibronectin	FINC_HUMAN	1	78.4428	1.78443	Dengue	QC	NaN	NaN	NaN	85.2332	0.126282
Dengue / QC	_VLSIAQAHSPAFSC[Carbamidomethyl (C)]EQVR_	P08571	0.777827	0.777827	4.36337e-11	2.01484e-10	60	P08571	CD14	Monocyte differentiation antigen CD14	CD14_HUMAN	1	71.4547	1.71455	Dengue	QC	NaN	NaN	NaN	45.6933	0.0859901
Dengue / QC	_VQFELHYQEVKWR_	P19823	3.3021	3.3021	4.61747e-11	2.12891e-10	26	P19823	ITIH2	Inter-alpha-trypsin inhibitor heavy chain H2	ITIH2_HUMAN	1	886.347	9.86347	Dengue	QC	NaN	NaN	NaN	19.0251	0.215681
Dengue / QC	_TYLFKGSQYWR_	P04004	2.41556	2.41556	4.64314e-11	2.13911e-10	70	P04004	VTN	Vitronectin	VTNC_HUMAN	1	433.526	5.33526	Dengue	QC	NaN	NaN	NaN	60.6428	0.236876
Dengue / QC	_HSTFIPGTNK_	P08519	1.04209	1.04209	4.65583e-11	2.1417e-10	68	P08519	LPA	Apolipoprotein(a)	APOA_HUMAN	1	105.92	2.0592	Dengue	QC	NaN	NaN	NaN	62.6095	0.139613
Dengue / QC	_TPC[Carbamidomethyl (C)]TVSC[Carbamidomethyl (C)]NIPVVSGK_	P02675	2.53077	2.53077	4.81701e-11	2.20908e-10	132	P02675	FGB	Fibrinogen beta chain	FIBB_HUMAN	1	477.879	5.77879	Dengue	QC	NaN	NaN	NaN	108.42	0.326673
Dengue / QC	_DC[Carbamidomethyl (C)]NTC[Carbamidomethyl (C)]IC[Carbamidomethyl (C)]R_	P04275	1.52816	1.52816	4.83693e-11	2.21653e-10	54	P04275	VWF	von Willebrand factor	VWF_HUMAN	1	188.418	2.88418	Dengue	QC	NaN	NaN	NaN	40.8261	0.184124
Dengue / QC	_WVMVPMMSLHHLTIPYFRDEELSC[Carbamidomethyl (C)]TVVELK_	P01011	1.40728	1.40728	5.01324e-11	2.29209e-10	98	P01011	SERPINA3	Alpha-1-antichymotrypsin	AACT_HUMAN	1	165.236	2.65236	Dengue	QC	NaN	NaN	NaN	88.0183	0.175777
Dengue / QC	_SEDTAMYYC[Carbamidomethyl (C)]VR_	A0A087WYE8;A0A0B4J2B8	0.181113	0.181113	5.1664e-11	2.35854e-10	58	A0A087WYE8;A0A0B4J2B8	IGHV1OR21-1;IGHV1OR15-9	Immunoglobulin heavy variable 1/OR21-1 (non-functional) (Fragment);Immunoglobulin heavy variable 1/OR15-9 (non-functional) (Fragment)	A0A087WYE8_HUMAN;A0A0B4J2B8_HUMAN	1	13.3758	1.13376	Dengue	QC	NaN	NaN	NaN	42.144	0.142447
Dengue / QC	_SAVTALWGKVNVDEVGGEALGR_	P68871	0.910436	0.910436	5.30853e-11	2.41976e-10	160	P68871	HBB	Hemoglobin subunit beta	HBB_HUMAN	1	87.9614	1.87961	Dengue	QC	NaN	NaN	NaN	129.002	0.132669
Dengue / QC	_TEQAAVAR_	P00748	0.830038	0.830038	5.50101e-11	2.50182e-10	164	P00748	F12	Coagulation factor XII	FA12_HUMAN	1	77.7732	1.77773	Dengue	QC	NaN	NaN	NaN	74.372	0.103563
Dengue / QC	_VPGTSTSATLTGLTR_	P02751;P02751-15;P02751-3;P02751-7	0.50329	0.50329	5.7244e-11	2.59168e-10	112	P02751;P02751-15;P02751-3;P02751-7	FN1	Fibronectin;Isoform 15 of Fibronectin;Isoform 3 of Fibronectin;Isoform 7 of Fibronectin	FINC_HUMAN	1	41.7443	1.41744	Dengue	QC	NaN	NaN	NaN	80.9707	0.155426
Dengue / QC	_RLEVDIDIK_	P02671	3.31486	3.31486	5.73636e-11	2.59514e-10	66	P02671	FGA	Fibrinogen alpha chain	FIBA_HUMAN	1	895.113	9.95113	Dengue	QC	NaN	NaN	NaN	49.2924	0.370933
Dengue / QC	_C[Carbamidomethyl (C)]EAC[Carbamidomethyl (C)]PPGYSGPTHQGVGLAFAK_	G3XAP6;P49747	1.2387	1.2387	5.92495e-11	2.67845e-10	52	G3XAP6;P49747	COMP	Cartilage oligomeric matrix protein	G3XAP6_HUMAN;COMP_HUMAN	1	135.986	2.35986	Dengue	QC	NaN	NaN	NaN	38.2866	0.189571
Dengue / QC	_FC[Carbamidomethyl (C)]EAEFSVK_	Q16610	1.05359	1.05359	6.21821e-11	2.80261e-10	78	Q16610	ECM1	Extracellular matrix protein 1	ECM1_HUMAN	1	107.568	2.07568	Dengue	QC	NaN	NaN	NaN	62.9446	0.153348
Dengue / QC	_GFNC[Carbamidomethyl (C)]ESKPEAEETC[Carbamidomethyl (C)]FDK_	P02751;P02751-15;P02751-3;P02751-7	1.19438	1.19438	6.22314e-11	2.80274e-10	78	P02751;P02751-15;P02751-3;P02751-7	FN1	Fibronectin;Isoform 15 of Fibronectin;Isoform 3 of Fibronectin;Isoform 7 of Fibronectin	FINC_HUMAN	1	128.846	2.28846	Dengue	QC	NaN	NaN	NaN	62.9494	0.136045
Dengue / QC	_GSFQC[Carbamidomethyl (C)]GPC[Carbamidomethyl (C)]QPGFVGDQASGC[Carbamidomethyl (C)]QR_	G3XAP6;P49747	1.4309	1.4309	6.48153e-11	2.91693e-10	48	G3XAP6;P49747	COMP	Cartilage oligomeric matrix protein	G3XAP6_HUMAN;COMP_HUMAN	1	169.615	2.69615	Dengue	QC	NaN	NaN	NaN	41.5801	0.191521
Dengue / QC	_DKVTAWK_	P19827	1.19613	1.19613	6.72527e-11	3.02211e-10	60	P19827	ITIH1	Inter-alpha-trypsin inhibitor heavy chain H1	ITIH1_HUMAN	1	129.124	2.29124	Dengue	QC	NaN	NaN	NaN	52.8459	0.147105
Dengue / QC	_TVIGPDGHK_	P02671	1.20773	1.20773	6.76975e-11	3.03983e-10	114	P02671	FGA	Fibrinogen alpha chain	FIBA_HUMAN	1	130.973	2.30973	Dengue	QC	NaN	NaN	NaN	101.77	0.231447
Dengue / QC	_LSPIYNLVPVK_	P02748	-0.716463	0.716463	6.85525e-11	3.07364e-10	160	P02748	C9	Complement component C9	CO9_HUMAN	1	-39.1413	0.608587	Dengue	QC	NaN	NaN	NaN	72.4953	0.0893549
Dengue / QC	_LELELRPTGEIEQYSVSATYELQR_	P04114	0.703506	0.703506	6.85189e-11	3.07364e-10	150	P04114	APOB	Apolipoprotein B-100	APOB_HUMAN	1	62.8457	1.62846	Dengue	QC	NaN	NaN	NaN	113.221	0.0922202
Dengue / QC	_SGNTFRPEVHLLPPPSEELALNELVTLTC[Carbamidomethyl (C)]LAR_	A0A0G2JMB2	1.2563	1.2563	6.87513e-11	3.08026e-10	176	A0A0G2JMB2	IGHA2	Immunoglobulin heavy constant alpha 2 (Fragment)	A0A0G2JMB2_HUMAN	1	138.882	2.38882	Dengue	QC	NaN	NaN	NaN	141.047	0.171789
Dengue / QC	_NAIGGKFPLYNLGFGNNLNYNFLENMALENHGFARR_	Q06033;Q06033-2	2.35169	2.35169	6.95512e-11	3.11378e-10	52	Q06033;Q06033-2	ITIH3	Inter-alpha-trypsin inhibitor heavy chain H3;Isoform 2 of Inter-alpha-trypsin inhibitor heavy chain H3	ITIH3_HUMAN	1	410.423	5.10423	Dengue	QC	NaN	NaN	NaN	33.9841	0.245334
Dengue / QC	_ANRPFLVFIREVPLNTIIFM[Oxidation (M)]GR_	P01008	1.1478	1.1478	6.9807e-11	3.12292e-10	78	P01008	SERPINC1	Antithrombin-III	ANT3_HUMAN	1	121.576	2.21576	Dengue	QC	NaN	NaN	NaN	52.6963	0.164222
Dengue / QC	_TLDHDRC[Carbamidomethyl (C)]DQHTDC[Carbamidomethyl (C)]YSC[Carbamidomethyl (C)]TANTNDC[Carbamidomethyl (C)]HWC[Carbamidomethyl (C)]NDHC[Carbamidomethyl (C)]VPR_	O75882;O75882-2	0.992191	0.992191	7.08829e-11	3.16635e-10	52	O75882;O75882-2	ATRN	Attractin;Isoform 2 of Attractin	ATRN_HUMAN	1	98.9203	1.9892	Dengue	QC	NaN	NaN	NaN	43.4171	0.113695
Dengue / QC	_SIYGEKFEDENFILK_	P62937	1.06818	1.06818	7.35565e-11	3.27849e-10	38	P62937	PPIA	Peptidyl-prolyl cis-trans isomerase A	PPIA_HUMAN	1	109.678	2.09678	Dengue	QC	NaN	NaN	NaN	32.3026	0.101354
Dengue / QC	_QLYNVEATSYALLALLQLK_	P01024	0.424053	0.424053	7.85585e-11	3.49885e-10	34	P01024	C3	Complement C3	CO3_HUMAN	1	34.1691	1.34169	Dengue	QC	NaN	NaN	NaN	28.0422	0.0825292
Dengue / QC	_LLIYDASNRATGIPAR_	P04433	4.8908	4.8908	7.96581e-11	3.5452e-10	60	P04433	IGKV3-11	Immunoglobulin kappa variable 3-11	KV311_HUMAN	1	2866.72	29.6672	Dengue	QC	NaN	NaN	NaN	29.5192	0.464662
Dengue / QC	_WSPELPVC[Carbamidomethyl (C)]APIIC[Carbamidomethyl (C)]PPPSIPTFATLR_	P02749	0.666777	0.666777	8.35013e-11	3.70257e-10	170	P02749	APOH	Beta-2-glycoprotein 1	APOH_HUMAN	1	58.7523	1.58752	Dengue	QC	NaN	NaN	NaN	96.7988	0.0883482
Dengue / QC	_VTM[Oxidation (M)]TEDTSTDTAYMELSSLR_	A0A0C4DH33	0.687322	0.687322	8.41904e-11	3.73038e-10	46	A0A0C4DH33	IGHV1-24	Immunoglobulin heavy variable 1-24	HV124_HUMAN	1	61.0291	1.61029	Dengue	QC	NaN	NaN	NaN	20.9365	0.395248
Dengue / QC	_AC[Carbamidomethyl (C)]GAC[Carbamidomethyl (C)]PLWGKC[Carbamidomethyl (C)]DAESSK_	P10643	3.50583	3.50583	8.64834e-11	3.82916e-10	46	P10643	C7	Complement component C7	CO7_HUMAN	1	1035.95	11.3595	Dengue	QC	NaN	NaN	NaN	27.2654	0.27664
Dengue / QC	_SYLSMVGSC[Carbamidomethyl (C)]C[Carbamidomethyl (C)]TSASPTVC[Carbamidomethyl (C)]FLK_	P02774;P02774-3	0.398156	0.398156	8.74869e-11	3.86791e-10	118	P02774;P02774-3	GC	Vitamin D-binding protein;Isoform 3 of Vitamin D-binding protein	VTDB_HUMAN	1	31.7822	1.31782	Dengue	QC	NaN	NaN	NaN	103.088	0.0786655
Dengue / QC	_GFPSVLR_	P01871	-0.67861	0.67861	9.44837e-11	4.16503e-10	176	P01871	IGHM	Immunoglobulin heavy constant mu	IGHM_HUMAN	1	-37.5233	0.624767	Dengue	QC	NaN	NaN	NaN	77.6767	0.088524
Dengue / QC	_QVKDNENVVNEYSSELEK_	P02675	1.66876	1.66876	9.79919e-11	4.30393e-10	42	P02675	FGB	Fibrinogen beta chain	FIBB_HUMAN	1	217.942	3.17942	Dengue	QC	NaN	NaN	NaN	37.1109	0.180612
Dengue / QC	_AQYVLISPEASSR_	P80108	0.335652	0.335652	9.84814e-11	4.32228e-10	172	P80108	GPLD1	Phosphatidylinositol-glycan-specific phospholipase D	PHLD_HUMAN	1	26.1948	1.26195	Dengue	QC	NaN	NaN	NaN	129.722	0.0600597
Dengue / QC	_YVMLPVADQDQC[Carbamidomethyl (C)]IRHYEGSTVPEKK_	P00738	3.47131	3.47131	9.9611e-11	4.36868e-10	78	P00738	HP	Haptoglobin	HPT_HUMAN	1	1009.1	11.091	Dengue	QC	NaN	NaN	NaN	42.2028	0.380115
Dengue / QC	_AAFGQGSGPIM[Oxidation (M)]LDEVQC[Carbamidomethyl (C)]TGTEASLADC[Carbamidomethyl (C)]K_	Q08380	0.500386	0.500386	9.97487e-11	4.37153e-10	40	Q08380	LGALS3BP	Galectin-3-binding protein	LG3BP_HUMAN	1	41.4592	1.41459	Dengue	QC	NaN	NaN	NaN	18.3476	0.335468
Dengue / QC	_FTDHLKYVMLPVADQDQC[Carbamidomethyl (C)]IR_	P00738	2.90365	2.90365	1.01923e-10	4.4592e-10	76	P00738	HP	Haptoglobin	HPT_HUMAN	1	648.319	7.48319	Dengue	QC	NaN	NaN	NaN	49.7753	0.367167
Dengue / QC	_VLNYVDWIKKEMEEED_	B4DPQ0	1.02922	1.02922	1.01971e-10	4.4592e-10	106	B4DPQ0	C1R	Complement C1r subcomponent	B4DPQ0_HUMAN	1	104.092	2.04092	Dengue	QC	NaN	NaN	NaN	38.5821	0.100258
Dengue / QC	_TILDDLRAEDHFSVIDFNQNIR_	P19823	0.629986	0.629986	1.02924e-10	4.49435e-10	132	P19823	ITIH2	Inter-alpha-trypsin inhibitor heavy chain H2	ITIH2_HUMAN	1	54.755	1.54755	Dengue	QC	NaN	NaN	NaN	100.888	0.089783
Dengue / QC	_GFQHLLHTLNLPGHGLETR_	P29622	0.711262	0.711262	1.09202e-10	4.75126e-10	130	P29622	SERPINA4	Kallistatin	KAIN_HUMAN	1	63.7236	1.63724	Dengue	QC	NaN	NaN	NaN	119.849	0.103302
Dengue / QC	_GSESGIFTNTKESSSHHPGIAEFPSR_	P02671	2.59211	2.59211	1.13747e-10	4.93478e-10	92	P02671	FGA	Fibrinogen alpha chain	FIBA_HUMAN	1	502.98	6.0298	Dengue	QC	NaN	NaN	NaN	66.5082	0.327208
Dengue / QC	_AQLVDMK_	P02671	2.63291	2.63291	1.16967e-10	5.05626e-10	148	P02671	FGA	Fibrinogen alpha chain	FIBA_HUMAN	1	520.274	6.20274	Dengue	QC	NaN	NaN	NaN	128.585	0.343692
Dengue / QC	_LC[Carbamidomethyl (C)]FFPFVENGHSESSGQTHLEGDTVQIIC[Carbamidomethyl (C)]NTGYR_	Q03591	0.7074	0.7074	1.17972e-10	5.08379e-10	138	Q03591	CFHR1	Complement factor H-related protein 1	FHR1_HUMAN	1	63.2859	1.63286	Dengue	QC	NaN	NaN	NaN	101.673	0.093763
Dengue / QC	_VTSTLTIKESDWLGQSMFTC[Carbamidomethyl (C)]R_	P01871	0.18458	0.18458	1.22239e-10	5.25017e-10	108	P01871	IGHM	Immunoglobulin heavy constant mu	IGHM_HUMAN	1	13.6486	1.13649	Dengue	QC	NaN	NaN	NaN	42.0809	0.393473
Dengue / QC	_VHVSEEGTEPEAMLQVLGPKPALPAGTEDTAK_	P06396	1.11967	1.11967	1.22324e-10	5.25017e-10	50	P06396	GSN	Gelsolin	GELS_HUMAN	1	117.298	2.17298	Dengue	QC	NaN	NaN	NaN	21.1593	0.0945121
Dengue / QC	_YELDKAFSDRNTLIIYLDK_	P01024	0.740398	0.740398	1.24608e-10	5.33681e-10	70	P01024	C3	Complement C3	CO3_HUMAN	1	67.0636	1.67064	Dengue	QC	NaN	NaN	NaN	61.192	0.100409
Dengue / QC	_TLM[Oxidation (M)]FGSYLDDEKNWGLSFYADKPETTK_	P19652	-0.0385374	0.0385374	1.25493e-10	5.37087e-10	148	P19652	ORM2	Alpha-1-acid glycoprotein 2	A1AG2_HUMAN	1	-2.63585	0.973642	Dengue	QC	NaN	NaN	NaN	90.1422	0.165673
Dengue / QC	_TDELPQLVTLPHPNLHGPEILDVPSTVQK_	P02751;P02751-15;P02751-3;P02751-7	0.971061	0.971061	1.30574e-10	5.56462e-10	72	P02751;P02751-15;P02751-3;P02751-7	FN1	Fibronectin;Isoform 15 of Fibronectin;Isoform 3 of Fibronectin;Isoform 7 of Fibronectin	FINC_HUMAN	1	96.0281	1.96028	Dengue	QC	NaN	NaN	NaN	50.5589	0.106599
Dengue / QC	_FTC[Carbamidomethyl (C)]TVTHTDLPSPLK_	P01871	-0.561027	0.561027	1.35228e-10	5.74267e-10	176	P01871	IGHM	Immunoglobulin heavy constant mu	IGHM_HUMAN	1	-32.2181	0.677819	Dengue	QC	NaN	NaN	NaN	93.1944	0.0703723
Dengue / QC	_DNC[Carbamidomethyl (C)]C[Carbamidomethyl (C)]ILDER_	P02679;P02679-2	2.94644	2.94644	1.41687e-10	6.00005e-10	142	P02679;P02679-2	FGG	Fibrinogen gamma chain;Isoform Gamma-A of Fibrinogen gamma chain	FIBG_HUMAN	1	670.845	7.70845	Dengue	QC	NaN	NaN	NaN	112.157	0.379983
Dengue / QC	_AHLNIKSPAFTDLHLR_	P04114	4.23545	4.23545	1.45483e-10	6.14354e-10	34	P04114	APOB	Apolipoprotein B-100	APOB_HUMAN	1	1783.64	18.8364	Dengue	QC	NaN	NaN	NaN	26.5119	0.359797
Dengue / QC	_LNILNNNYK_	O14791;O14791-2	0.588737	0.588737	1.46413e-10	6.17847e-10	136	O14791;O14791-2	APOL1	Apolipoprotein L1;Isoform 2 of Apolipoprotein L1	APOL1_HUMAN	1	50.393	1.50393	Dengue	QC	NaN	NaN	NaN	93.1158	0.102855
Dengue / QC	_DSSTWLTAFVLKVLSLAQEQVGGSPEK_	A0A140TA49	0.888713	0.888713	1.48123e-10	6.23752e-10	80	A0A140TA49	C4A	Complement C4-A	A0A140TA49_HUMAN	1	85.1523	1.85152	Dengue	QC	NaN	NaN	NaN	44.6682	0.15891
Dengue / QC	_EWFWDLATGTMK_	P02790	1.01706	1.01706	1.48951e-10	6.26362e-10	120	P02790	HPX	Hemopexin	HEMO_HUMAN	1	102.379	2.02379	Dengue	QC	NaN	NaN	NaN	63.8027	0.119542
Dengue / QC	_QDSLSSQNQLGVLPLSWDIPELVNM[Oxidation (M)]GQWK_	P01024	0.927348	0.927348	1.48925e-10	6.26362e-10	72	P01024	C3	Complement C3	CO3_HUMAN	1	90.1777	1.90178	Dengue	QC	NaN	NaN	NaN	40.9354	0.101948
Dengue / QC	_ILEGFQPSGR_	P80108	0.454759	0.454759	1.51138e-10	6.34673e-10	128	P80108	GPLD1	Phosphatidylinositol-glycan-specific phospholipase D	PHLD_HUMAN	1	37.0554	1.37055	Dengue	QC	NaN	NaN	NaN	108.291	0.0572624
Dengue / QC	_LWAYLTIQELLAK_	P19827	1.03587	1.03587	1.54735e-10	6.48423e-10	120	P19827	ITIH1	Inter-alpha-trypsin inhibitor heavy chain H1	ITIH1_HUMAN	1	105.035	2.05035	Dengue	QC	NaN	NaN	NaN	87.2451	0.157757
Dengue / QC	_MLQITNTGFEMK_	P20742	2.63885	2.63885	1.67342e-10	6.95449e-10	74	P20742	PZP	Pregnancy zone protein	PZP_HUMAN	1	522.834	6.22834	Dengue	QC	NaN	NaN	NaN	47.5966	0.290359
Dengue / QC	_TSTADYAMFK_	P02679;P02679-2	2.71942	2.71942	1.69394e-10	7.03493e-10	130	P02679;P02679-2	FGG	Fibrinogen gamma chain;Isoform Gamma-A of Fibrinogen gamma chain	FIBG_HUMAN	1	558.607	6.58607	Dengue	QC	NaN	NaN	NaN	106.102	0.333853
Dengue / QC	_MKGLIDEVNQDFTNR_	P02671	1.83844	1.83844	1.70029e-10	7.05645e-10	34	P02671	FGA	Fibrinogen alpha chain	FIBA_HUMAN	1	257.624	3.57624	Dengue	QC	NaN	NaN	NaN	27.2383	0.161051
Dengue / QC	_QGFGNVATNTDGKNYC[Carbamidomethyl (C)]GLPGEYWLGNDKISQLTR_	P02675	1.81521	1.81521	1.7087e-10	7.08648e-10	42	P02675	FGB	Fibrinogen beta chain	FIBB_HUMAN	1	251.911	3.51911	Dengue	QC	NaN	NaN	NaN	34.6404	0.198248
Dengue / QC	_GTFSTTVTGR_	P08519	1.41679	1.41679	1.74682e-10	7.22467e-10	132	P08519	LPA	Apolipoprotein(a)	APOA_HUMAN	1	166.991	2.66991	Dengue	QC	NaN	NaN	NaN	102.702	0.181006
Dengue / QC	_QNC[Carbamidomethyl (C)]ELFEQLGEYKFQNALLVR_	P02768	0.847371	0.847371	1.79638e-10	7.40929e-10	176	P02768	ALB	Serum albumin	ALBU_HUMAN	1	79.9219	1.79922	Dengue	QC	NaN	NaN	NaN	161.536	0.121868
Dengue / QC	_YGQPLPGYTTK_	A6XND0;P17936;P17936-2	0.654415	0.654415	1.79598e-10	7.40929e-10	44	A6XND0;P17936;P17936-2	IGFBP3	Insulin-like growth factor-binding protein 3;Insulin-like growth factor-binding protein 3;Isoform 2 of Insulin-like growth factor-binding protein 3	A6XND0_HUMAN;IBP3_HUMAN;IBP3_HUMAN	1	57.3977	1.57398	Dengue	QC	NaN	NaN	NaN	37.5693	0.0795552
Dengue / QC	_AQMDLSGR_	P00488	2.40699	2.40699	1.80603e-10	7.44401e-10	32	P00488	F13A1	Coagulation factor XIII A chain	F13A_HUMAN	1	430.366	5.30366	Dengue	QC	NaN	NaN	NaN	26.6542	0.245634
Dengue / QC	_ITFELVYEELLK_	Q14624	0.726235	0.726235	1.8141e-10	7.46703e-10	146	Q14624	ITIH4	Inter-alpha-trypsin inhibitor heavy chain H4	ITIH4_HUMAN	1	65.4316	1.65432	Dengue	QC	NaN	NaN	NaN	85.8419	0.133379
Dengue / QC	_DFALQNPSAVPR_	P35858;P35858-2	0.418635	0.418635	1.98075e-10	8.10871e-10	126	P35858;P35858-2	IGFALS	Insulin-like growth factor-binding protein complex acid labile subunit;Isoform 2 of Insulin-like growth factor-binding protein complex acid labile subunit	ALS_HUMAN	1	33.6662	1.33666	Dengue	QC	NaN	NaN	NaN	114.711	0.0685459
Dengue / QC	_GDDITMVLILPKPEK_	P01008	0.705895	0.705895	1.98525e-10	8.12162e-10	88	P01008	SERPINC1	Antithrombin-III	ANT3_HUMAN	1	63.1156	1.63116	Dengue	QC	NaN	NaN	NaN	80.2899	0.120081
Dengue / QC	_LTIFKTELR_	P04114	1.05089	1.05089	1.99417e-10	8.15256e-10	146	P04114	APOB	Apolipoprotein B-100	APOB_HUMAN	1	107.181	2.07181	Dengue	QC	NaN	NaN	NaN	133.623	0.148942
Dengue / QC	_AIFYMNNPSR_	Q9UGM5	0.575817	0.575817	1.99728e-10	8.15973e-10	78	Q9UGM5	FETUB	Fetuin-B	FETUB_HUMAN	1	49.0521	1.49052	Dengue	QC	NaN	NaN	NaN	60.7858	0.0695995
Dengue / QC	_NPNLPPETVDSLKNILTSNNIDVK_	P05090	0.635182	0.635182	2.14302e-10	8.69621e-10	146	P05090	APOD	Apolipoprotein D	APOD_HUMAN	1	55.3134	1.55313	Dengue	QC	NaN	NaN	NaN	121.908	0.0792142
Dengue / QC	_LHLDYIGPC[Carbamidomethyl (C)]K_	P09486	0.695771	0.695771	2.15406e-10	8.73511e-10	60	P09486	SPARC	SPARC	SPRC_HUMAN	1	61.975	1.61975	Dengue	QC	NaN	NaN	NaN	43.3899	0.110919
Dengue / QC	_WEDPGKQLYNVEATSYALLALLQLK_	P01024	0.408536	0.408536	2.16826e-10	8.78086e-10	46	P01024	C3	Complement C3	CO3_HUMAN	1	32.7338	1.32734	Dengue	QC	NaN	NaN	NaN	29.7726	0.124036
Dengue / QC	_TSESGELHGLTTEEEFVEGIYKVEIDTK_	P02766	1.1296	1.1296	2.18182e-10	8.82393e-10	176	P02766	TTR	Transthyretin	TTHY_HUMAN	1	118.799	2.18799	Dengue	QC	NaN	NaN	NaN	118.942	0.122959
Dengue / QC	_VLAPATFYAIC[Carbamidomethyl (C)]QQDSC[Carbamidomethyl (C)]HQEQVC[Carbamidomethyl (C)]EVIASYAHLC[Carbamidomethyl (C)]R_	P04275	1.52977	1.52977	2.19516e-10	8.86596e-10	68	P04275	VWF	von Willebrand factor	VWF_HUMAN	1	188.74	2.8874	Dengue	QC	NaN	NaN	NaN	53.5182	0.17416
Dengue / QC	_DGEKVSVLC[Carbamidomethyl (C)]QENYLIQEGEEITC[Carbamidomethyl (C)]KDGR_	P08603	1.1234	1.1234	2.20643e-10	8.90551e-10	122	P08603	CFH	Complement factor H	CFAH_HUMAN	1	117.859	2.17859	Dengue	QC	NaN	NaN	NaN	106.638	0.126198
Dengue / QC	_ETAVDGELVVLYDVKREEK_	P19823	0.818285	0.818285	2.29078e-10	9.22742e-10	136	P19823	ITIH2	Inter-alpha-trypsin inhibitor heavy chain H2	ITIH2_HUMAN	1	76.3308	1.76331	Dengue	QC	NaN	NaN	NaN	95.3986	0.109666
Dengue / QC	_YGIDWASGR_	O75636	-0.678906	0.678906	2.31741e-10	9.32843e-10	170	O75636	FCN3	Ficolin-3	FCN3_HUMAN	1	-37.5361	0.624639	Dengue	QC	NaN	NaN	NaN	57.1823	0.090257
Dengue / QC	_ITTGGDVINNGLWNMVSVEELEHSISIK_	P07225	0.593226	0.593226	2.34213e-10	9.41538e-10	138	P07225	PROS1	Vitamin K-dependent protein S	PROS_HUMAN	1	50.8617	1.50862	Dengue	QC	NaN	NaN	NaN	98.5347	0.0875952
Dengue / QC	_TFVLNFIK_	E7END6;P04070;P04070-2	1.10186	1.10186	2.37555e-10	9.54337e-10	34	E7END6;P04070;P04070-2	PROC	Vitamin K-dependent protein C;Vitamin K-dependent protein C;Isoform 2 of Vitamin K-dependent protein C	E7END6_HUMAN;PROC_HUMAN;PROC_HUMAN	1	114.631	2.14631	Dengue	QC	NaN	NaN	NaN	19.3086	0.136223
Dengue / QC	_LAEGFPLPLLK_	P18428	1.63195	1.63195	2.40396e-10	9.64465e-10	16	P18428	LBP	Lipopolysaccharide-binding protein	LBP_HUMAN	1	209.933	3.09933	Dengue	QC	NaN	NaN	NaN	9.88728	0.0709674
Dengue / QC	_ILGEELGFASLHDLQLLGK_	P04114	0.626474	0.626474	2.43765e-10	9.77331e-10	80	P04114	APOB	Apolipoprotein B-100	APOB_HUMAN	1	54.3787	1.54379	Dengue	QC	NaN	NaN	NaN	68.7839	0.102159
Dengue / QC	_YLQEIYNSNNQK_	P02679;P02679-2	1.5955	1.5955	2.57527e-10	1.0284e-09	126	P02679;P02679-2	FGG	Fibrinogen gamma chain;Isoform Gamma-A of Fibrinogen gamma chain	FIBG_HUMAN	1	202.199	3.02199	Dengue	QC	NaN	NaN	NaN	103.899	0.209402
Dengue / QC	_AIGYATAADC[Carbamidomethyl (C)]GR_	Q9Y6R7	1.18418	1.18418	2.66237e-10	1.06074e-09	114	Q9Y6R7	FCGBP	IgGFc-binding protein	FCGBP_HUMAN	1	127.235	2.27235	Dengue	QC	NaN	NaN	NaN	84.543	0.186185
Dengue / QC	_VKENFDK_	P02753;Q5VY30	1.3781	1.3781	2.77544e-10	1.10249e-09	124	P02753;Q5VY30	RBP4	Retinol-binding protein 4;Retinol binding protein 4, plasma, isoform CRA_b	RET4_HUMAN;Q5VY30_HUMAN	1	159.925	2.59925	Dengue	QC	NaN	NaN	NaN	76.2414	0.158548
Dengue / QC	_EVKIDGQFR_	P04114	0.886883	0.886883	2.91559e-10	1.15058e-09	40	P04114	APOB	Apolipoprotein B-100	APOB_HUMAN	1	84.9177	1.84918	Dengue	QC	NaN	NaN	NaN	26.0862	0.190859
Dengue / QC	_LSNLIKLAQKVPTADLEDVLPLAEDITNILSK_	P02774;P02774-3	2.39764	2.39764	2.97261e-10	1.17231e-09	60	P02774;P02774-3	GC	Vitamin D-binding protein;Isoform 3 of Vitamin D-binding protein	VTDB_HUMAN	1	426.942	5.26942	Dengue	QC	NaN	NaN	NaN	49.7275	0.31457
Dengue / QC	_LIVHNGYC[Carbamidomethyl (C)]DGRSER_	P02753;Q5VY30	3.04018	3.04018	3.03849e-10	1.19673e-09	68	P02753;Q5VY30	RBP4	Retinol-binding protein 4;Retinol binding protein 4, plasma, isoform CRA_b	RET4_HUMAN;Q5VY30_HUMAN	1	722.594	8.22594	Dengue	QC	NaN	NaN	NaN	45.7972	0.332361
Dengue / QC	_ALVQQMEQLR_	P06727	0.762848	0.762848	3.1152e-10	1.22454e-09	112	P06727	APOA4	Apolipoprotein A-IV	APOA4_HUMAN	1	69.6837	1.69684	Dengue	QC	NaN	NaN	NaN	95.6991	0.121256
Dengue / QC	_PSGVPDRFSGSK_	P01703	1.62456	1.62456	3.19687e-10	1.255e-09	26	P01703	IGLV1-40	Immunoglobulin lambda variable 1-40	LV140_HUMAN	1	208.349	3.08349	Dengue	QC	NaN	NaN	NaN	16.5781	0.571329
Dengue / QC	_VADALTNAVAHVDDMPNALSALSDLHAHKLR_	P69905	1.20568	1.20568	3.30535e-10	1.29422e-09	96	P69905	HBA1	Hemoglobin subunit alpha	HBA_HUMAN	1	130.647	2.30647	Dengue	QC	NaN	NaN	NaN	73.4874	0.119149
Dengue / QC	_EDLIWELLNQAQEHFGK_	P02787	1.00807	1.00807	3.322e-10	1.29905e-09	150	P02787	TF	Serotransferrin	TRFE_HUMAN	1	101.121	2.01121	Dengue	QC	NaN	NaN	NaN	131.425	0.124746
Dengue / QC	_LWLEGNPWDC[Carbamidomethyl (C)]GC[Carbamidomethyl (C)]PLK_	P35858;P35858-2	0.561402	0.561402	3.34861e-10	1.30861e-09	124	P35858;P35858-2	IGFALS	Insulin-like growth factor-binding protein complex acid labile subunit;Isoform 2 of Insulin-like growth factor-binding protein complex acid labile subunit	ALS_HUMAN	1	47.5703	1.4757	Dengue	QC	NaN	NaN	NaN	98.4107	0.08126
Dengue / QC	_VLNYVDWIK_	B4DPQ0	0.561808	0.561808	3.37899e-10	1.31792e-09	74	B4DPQ0	C1R	Complement C1r subcomponent	B4DPQ0_HUMAN	1	47.6118	1.47612	Dengue	QC	NaN	NaN	NaN	62.2322	0.0949871
Dengue / QC	_VTFHNKGAYPLSIEPIGVR_	P00450	1.43867	1.43867	3.52048e-10	1.37133e-09	132	P00450	CP	Ceruloplasmin	CERU_HUMAN	1	171.07	2.7107	Dengue	QC	NaN	NaN	NaN	106.746	0.187741
Dengue / QC	_YSFTIELR_	A0A087WSY5;Q96IY4	0.711057	0.711057	3.54539e-10	1.38014e-09	136	A0A087WSY5;Q96IY4	CPB2	Carboxypeptidase B2	A0A087WSY5_HUMAN;CBPB2_HUMAN	1	63.7003	1.637	Dengue	QC	NaN	NaN	NaN	62.3872	0.108791
Dengue / QC	_VLRENADSLQASLRPHADELK_	P06727	0.6949	0.6949	3.65176e-10	1.41971e-09	168	P06727	APOA4	Apolipoprotein A-IV	APOA4_HUMAN	1	61.8772	1.61877	Dengue	QC	NaN	NaN	NaN	126.412	0.0909817
Dengue / QC	_C[Carbamidomethyl (C)]LAYDFYPGKIDVHWTR_	P25311	1.82372	1.82372	3.71088e-10	1.43805e-09	118	P25311	AZGP1	Zinc-alpha-2-glycoprotein	ZA2G_HUMAN	1	253.993	3.53993	Dengue	QC	NaN	NaN	NaN	76.215	0.196781
Dengue / QC	_LFLEPTQADIALLK_	P08519	1.10652	1.10652	3.74504e-10	1.44943e-09	114	P08519	LPA	Apolipoprotein(a)	APOA_HUMAN	1	115.326	2.15326	Dengue	QC	NaN	NaN	NaN	91.1941	0.117493
Dengue / QC	_SIAYLQMNSLK_	A0A0A0MS15	-0.701958	0.701958	3.78276e-10	1.46121e-09	168	A0A0A0MS15	IGHV3-49	Immunoglobulin heavy variable 3-49	HV349_HUMAN	1	-38.5263	0.614737	Dengue	QC	NaN	NaN	NaN	73.1162	0.0923138
Dengue / QC	_AHVDALRTHLAPYSDELRQR_	P02647	1.03437	1.03437	3.89631e-10	1.4974e-09	64	P02647	APOA1	Apolipoprotein A-I	APOA1_HUMAN	1	104.821	2.04821	Dengue	QC	NaN	NaN	NaN	59.4203	0.117938
Dengue / QC	_TPAYYPNAGLIK_	P08519	1.29664	1.29664	3.89506e-10	1.4974e-09	140	P08519	LPA	Apolipoprotein(a)	APOA_HUMAN	1	145.657	2.45657	Dengue	QC	NaN	NaN	NaN	117.122	0.194986
Dengue / QC	_LGEDHKQC[Carbamidomethyl (C)]VPHDQC[Carbamidomethyl (C)]AC[Carbamidomethyl (C)]GVLTSEK_	P22891;P22891-2	1.8151	1.8151	3.91104e-10	1.5021e-09	40	P22891;P22891-2	PROZ	Vitamin K-dependent protein Z;Isoform 2 of Vitamin K-dependent protein Z	PROZ_HUMAN	1	251.885	3.51885	Dengue	QC	NaN	NaN	NaN	33.203	0.210192
Dengue / QC	_TAGYGINILGM[Oxidation (M)]DPLSTPFDNEFYNGLC[Carbamidomethyl (C)]NR_	P02748	0.394743	0.394743	4.04968e-10	1.55139e-09	48	P02748	C9	Complement component C9	CO9_HUMAN	1	31.4709	1.31471	Dengue	QC	NaN	NaN	NaN	28.0791	0.198464
Dengue / QC	_YTTEIIKC[Carbamidomethyl (C)]PQPK_	B4DPQ0	2.01451	2.01451	4.23567e-10	1.61648e-09	116	B4DPQ0	C1R	Complement C1r subcomponent	B4DPQ0_HUMAN	1	304.043	4.04043	Dengue	QC	NaN	NaN	NaN	93.109	0.230096
Dengue / QC	_DKDQEVLLQTFLDDASPGDK_	P04114	0.896661	0.896661	4.41284e-10	1.68196e-09	82	P04114	APOB	Apolipoprotein B-100	APOB_HUMAN	1	86.1752	1.86175	Dengue	QC	NaN	NaN	NaN	42.2935	0.0993676
Dengue / QC	_ILDELLQTC[Carbamidomethyl (C)]VDPEDC[Carbamidomethyl (C)]PVC[Carbamidomethyl (C)]EVAGRR_	P04275	0.915468	0.915468	4.46563e-10	1.69778e-09	86	P04275	VWF	von Willebrand factor	VWF_HUMAN	1	88.6181	1.88618	Dengue	QC	NaN	NaN	NaN	68.3468	0.142886
Dengue / QC	_AVSM[Oxidation (M)]PSFSILGSDVR_	P04114	0.708981	0.708981	4.47624e-10	1.70075e-09	36	P04114	APOB	Apolipoprotein B-100	APOB_HUMAN	1	63.465	1.63465	Dengue	QC	NaN	NaN	NaN	28.585	0.0741526
Dengue / QC	_AVGSGATFSHYYYMILSRGQIVFMNREPK_	P0C0L5	0.670736	0.670736	4.50415e-10	1.71027e-09	140	P0C0L5	C4B	Complement C4-B	CO4B_HUMAN	1	59.1884	1.59188	Dengue	QC	NaN	NaN	NaN	99.712	0.0867773
Dengue / QC	_C[Carbamidomethyl (C)]LVNLIEK_	B4E1Z4	0.376833	0.376833	4.56579e-10	1.73041e-09	86	B4E1Z4	NaN	cDNA FLJ55673, highly similar to Complement factor B (EC 3.4.21.47)	B4E1Z4_HUMAN	1	29.8488	1.29849	Dengue	QC	NaN	NaN	NaN	72.1048	0.0694672
Dengue / QC	_LNHQLEGLTFQMK_	P06727	0.578167	0.578167	4.5786e-10	1.73417e-09	122	P06727	APOA4	Apolipoprotein A-IV	APOA4_HUMAN	1	49.2951	1.49295	Dengue	QC	NaN	NaN	NaN	117.59	0.0825455
Dengue / QC	_LVTSKGDKELR_	P02671	2.88501	2.88501	4.75475e-10	1.7975e-09	140	P02671	FGA	Fibrinogen alpha chain	FIBA_HUMAN	1	638.712	7.38712	Dengue	QC	NaN	NaN	NaN	110.428	0.386904
Dengue / QC	_NQGILEFYGDDIALLK_	B4E1Z4	1.16699	1.16699	4.86941e-10	1.83969e-09	54	B4E1Z4	NaN	cDNA FLJ55673, highly similar to Complement factor B (EC 3.4.21.47)	B4E1Z4_HUMAN	1	124.542	2.24542	Dengue	QC	NaN	NaN	NaN	30.6477	0.121467
Dengue / QC	_TYTC[Carbamidomethyl (C)]NVDHKPSNTKVDK_	P01861	1.40514	1.40514	4.89938e-10	1.84754e-09	140	P01861	IGHG4	Immunoglobulin heavy constant gamma 4	IGHG4_HUMAN	1	164.843	2.64843	Dengue	QC	NaN	NaN	NaN	121.712	0.167464
Dengue / QC	_ETTFNSLLC[Carbamidomethyl (C)]PSGGEVSEELSLK_	P01023	0.65868	0.65868	5.05143e-10	1.90249e-09	152	P01023	A2M	Alpha-2-macroglobulin	A2MG_HUMAN	1	57.8637	1.57864	Dengue	QC	NaN	NaN	NaN	142.625	0.104839
Dengue / QC	_RPHETGGYMLEC[Carbamidomethyl (C)]VC[Carbamidomethyl (C)]LGNGK_	P02751;P02751-15;P02751-3;P02751-7	0.893911	0.893911	5.0681e-10	1.90758e-09	60	P02751;P02751-15;P02751-3;P02751-7	FN1	Fibronectin;Isoform 15 of Fibronectin;Isoform 3 of Fibronectin;Isoform 7 of Fibronectin	FINC_HUMAN	1	85.8206	1.85821	Dengue	QC	NaN	NaN	NaN	47.8362	0.126945
Dengue / QC	_TLAFPLTIR_	A0A0U1RQQ4;Q9UNN8	0.759089	0.759089	5.13303e-10	1.9284e-09	64	A0A0U1RQQ4;Q9UNN8	PROCR	Endothelial protein C receptor (Fragment);Endothelial protein C receptor	A0A0U1RQQ4_HUMAN;EPCR_HUMAN	1	69.2421	1.69242	Dengue	QC	NaN	NaN	NaN	32.1618	0.097166
Dengue / QC	_MELERPGGNEITR_	P02671	3.04643	3.04643	5.31701e-10	1.99504e-09	148	P02671	FGA	Fibrinogen alpha chain	FIBA_HUMAN	1	726.165	8.26165	Dengue	QC	NaN	NaN	NaN	121.191	0.37645
Dengue / QC	_ALRDFALQNPSAVPR_	P35858;P35858-2	0.454617	0.454617	5.35745e-10	2.00771e-09	124	P35858;P35858-2	IGFALS	Insulin-like growth factor-binding protein complex acid labile subunit;Isoform 2 of Insulin-like growth factor-binding protein complex acid labile subunit	ALS_HUMAN	1	37.0419	1.37042	Dengue	QC	NaN	NaN	NaN	116.969	0.0655165
Dengue / QC	_EYLIMGLDGATYDLEGHPQYLLDSNSWIEEMPSER_	P0C0L5	0.208175	0.208175	5.41115e-10	2.02406e-09	42	P0C0L5	C4B	Complement C4-B	CO4B_HUMAN	1	15.5226	1.15523	Dengue	QC	NaN	NaN	NaN	19.2471	0.387614
Dengue / QC	_ASSIIDELFQDRFFTR_	P10909;P10909-2;P10909-4;P10909-5	0.870487	0.870487	5.43757e-10	2.03016e-09	158	P10909;P10909-2;P10909-4;P10909-5	CLU	Clusterin;Isoform 2 of Clusterin;Isoform 4 of Clusterin;Isoform 5 of Clusterin	CLUS_HUMAN	1	82.8279	1.82828	Dengue	QC	NaN	NaN	NaN	86.2207	0.129364
Dengue / QC	_IMADSGPIYDKTYAGGR_	P07996	1.24987	1.24987	5.48119e-10	2.04518e-09	32	P07996	THBS1	Thrombospondin-1	TSP1_HUMAN	1	137.82	2.3782	Dengue	QC	NaN	NaN	NaN	25.8578	0.12195
Dengue / QC	_GGMRKFIC[Carbamidomethyl (C)]PLTGLWPINTLK_	P02749	1.38238	1.38238	5.48959e-10	2.04705e-09	170	P02749	APOH	Beta-2-glycoprotein 1	APOH_HUMAN	1	160.698	2.60698	Dengue	QC	NaN	NaN	NaN	152.232	0.170653
Dengue / QC	_KVETNMAFSPFSIASLLTQVLLGAGENTK_	P05155;P05155-3	0.690338	0.690338	5.64143e-10	2.10237e-09	106	P05155;P05155-3	SERPING1	Plasma protease C1 inhibitor;Isoform 3 of Plasma protease C1 inhibitor	IC1_HUMAN	1	61.3662	1.61366	Dengue	QC	NaN	NaN	NaN	37.5916	0.109537
Dengue / QC	_RITEVWGIPSPIDTVFTR_	Q92954-3	0.816659	0.816659	5.83715e-10	2.16726e-09	142	Q92954-3	PRG4	Isoform C of Proteoglycan 4	PRG4_HUMAN	1	76.1322	1.76132	Dengue	QC	NaN	NaN	NaN	73.0001	0.116618
Dengue / QC	_IQLVEEELDRAQER_	P67936	0.86015	0.86015	6.17127e-10	2.28288e-09	106	P67936	TPM4	Tropomyosin alpha-4 chain	TPM4_HUMAN	1	81.5227	1.81523	Dengue	QC	NaN	NaN	NaN	86.8822	0.145181
Dengue / QC	_LPLVPALDGC[Carbamidomethyl (C)]LR_	I3L145;P04278	1.7358	1.7358	6.19895e-10	2.29031e-09	32	I3L145;P04278	SHBG	Sex hormone-binding globulin	I3L145_HUMAN;SHBG_HUMAN	1	233.064	3.33064	Dengue	QC	NaN	NaN	NaN	20.0556	0.265972
Dengue / QC	_EYC[Carbamidomethyl (C)]GVPGDGDEELLRFSN_	P02760	2.48659	2.48659	6.21972e-10	2.29657e-09	46	P02760	AMBP	Protein AMBP	AMBP_HUMAN	1	460.451	5.60451	Dengue	QC	NaN	NaN	NaN	35.442	0.27221
Dengue / QC	_MADEAGSEADHEGTHSTKR_	P02671	2.10266	2.10266	6.26171e-10	2.30925e-09	172	P02671	FGA	Fibrinogen alpha chain	FIBA_HUMAN	1	329.501	4.29501	Dengue	QC	NaN	NaN	NaN	121.484	0.266917
Dengue / QC	_C[Carbamidomethyl (C)]NLLAEKQYGFC[Carbamidomethyl (C)]K_	P02765	1.80729	1.80729	6.36644e-10	2.34517e-09	146	P02765	AHSG	Alpha-2-HS-glycoprotein	FETUA_HUMAN	1	249.985	3.49985	Dengue	QC	NaN	NaN	NaN	116.338	0.242741
Dengue / QC	_RHLVPGAPFLLQALVREMSGSPASGIPVK_	P0C0L5	1.15438	1.15438	6.39998e-10	2.35591e-09	98	P0C0L5	C4B	Complement C4-B	CO4B_HUMAN	1	122.589	2.22589	Dengue	QC	NaN	NaN	NaN	65.5706	0.14994
Dengue / QC	_HHFPRHPNVFGFC[Carbamidomethyl (C)]R_	P04196	3.83288	3.83288	6.4129e-10	2.35923e-09	38	P04196	HRG	Histidine-rich glycoprotein	HRG_HUMAN	1	1324.99	14.2499	Dengue	QC	NaN	NaN	NaN	23.8032	0.417311
Dengue / QC	_RMPC[Carbamidomethyl (C)]AEDYLSVVLNQLC[Carbamidomethyl (C)]VLHEKTPVSDR_	P02768	0.910565	0.910565	6.5388e-10	2.40261e-09	176	P02768	ALB	Serum albumin	ALBU_HUMAN	1	87.9781	1.87978	Dengue	QC	NaN	NaN	NaN	154.533	0.140674
Dengue / QC	_NSITLTNLTPGTEYVVSIVALNGR_	P02751;P02751-15;P02751-3;P02751-7	1.47065	1.47065	6.67998e-10	2.45299e-09	68	P02751;P02751-15;P02751-3;P02751-7	FN1	Fibronectin;Isoform 15 of Fibronectin;Isoform 3 of Fibronectin;Isoform 7 of Fibronectin	FINC_HUMAN	1	177.146	2.77146	Dengue	QC	NaN	NaN	NaN	46.4682	0.19115
Dengue / QC	_IQC[Carbamidomethyl (C)]AAGYEQSEHNVC[Carbamidomethyl (C)]QDIDEC[Carbamidomethyl (C)]TAGTHNC[Carbamidomethyl (C)]R_	Q12805;Q12805-2;Q12805-4	0.970278	0.970278	7.00743e-10	2.56698e-09	120	Q12805;Q12805-2;Q12805-4	EFEMP1	EGF-containing fibulin-like extracellular matrix protein 1;Isoform 2 of EGF-containing fibulin-like extracellular matrix protein 1;Isoform 4 of EGF-containing fibulin-like extracellular matrix protein 1	FBLN3_HUMAN	1	95.9218	1.95922	Dengue	QC	NaN	NaN	NaN	111.508	0.123544
Dengue / QC	_LEPYADQLR_	P06727	0.559419	0.559419	7.03355e-10	2.57498e-09	120	P06727	APOA4	Apolipoprotein A-IV	APOA4_HUMAN	1	47.3676	1.47368	Dengue	QC	NaN	NaN	NaN	103.599	0.0988421
Dengue / QC	_YPLYVLK_	A0A087WSY5;Q96IY4	0.730507	0.730507	7.11192e-10	2.60209e-09	64	A0A087WSY5;Q96IY4	CPB2	Carboxypeptidase B2	A0A087WSY5_HUMAN;CBPB2_HUMAN	1	65.9223	1.65922	Dengue	QC	NaN	NaN	NaN	56.349	0.0927843
Dengue / QC	_YQKEEFC[Carbamidomethyl (C)]GLLSSPTGPLSSC[Carbamidomethyl (C)]HK_	Q9Y6R7	1.83216	1.83216	7.49962e-10	2.73729e-09	40	Q9Y6R7	FCGBP	IgGFc-binding protein	FCGBP_HUMAN	1	256.069	3.56069	Dengue	QC	NaN	NaN	NaN	33.776	0.235081
Dengue / QC	_VLTGNPRLDLQEINNWVQAQMKGK_	P36955	1.04963	1.04963	7.54639e-10	2.7527e-09	80	P36955	SERPINF1	Pigment epithelium-derived factor	PEDF_HUMAN	1	107	2.07	Dengue	QC	NaN	NaN	NaN	42.8637	0.104486
Dengue / QC	_TLVQEWTVQRPGQTC[Carbamidomethyl (C)]QPILEEQC[Carbamidomethyl (C)]LVPDSSHC[Carbamidomethyl (C)]QVLLLPLFAEC[Carbamidomethyl (C)]HK_	P04275	0.94421	0.94421	7.58851e-10	2.76639e-09	44	P04275	VWF	von Willebrand factor	VWF_HUMAN	1	92.4135	1.92414	Dengue	QC	NaN	NaN	NaN	38.7659	0.170402
Dengue / QC	_ITEVWGIPSPIDTVFTR_	Q92954-3	1.03728	1.03728	7.73413e-10	2.81606e-09	88	Q92954-3	PRG4	Isoform C of Proteoglycan 4	PRG4_HUMAN	1	105.236	2.05236	Dengue	QC	NaN	NaN	NaN	66.2856	0.15901
Dengue / QC	_WEDPGKQLYNVEATSYALLALLQLKDFDFVPPVVR_	P01024	0.994776	0.994776	7.90863e-10	2.87786e-09	74	P01024	C3	Complement C3	CO3_HUMAN	1	99.2771	1.99277	Dengue	QC	NaN	NaN	NaN	50.3798	0.222879
Dengue / QC	_VVTPLSPPTNLHLEANPDTGVLTVSWER_	P02751;P02751-15;P02751-3;P02751-7	0.937775	0.937775	7.97182e-10	2.89911e-09	102	P02751;P02751-15;P02751-3;P02751-7	FN1	Fibronectin;Isoform 15 of Fibronectin;Isoform 3 of Fibronectin;Isoform 7 of Fibronectin	FINC_HUMAN	1	91.5571	1.91557	Dengue	QC	NaN	NaN	NaN	61.5379	0.127799
Dengue / QC	_AVSM[Oxidation (M)]PSFSILGSDVRVPSYTLILPSLELPVLHVPR_	P04114	0.646412	0.646412	8.10635e-10	2.9427e-09	122	P04114	APOB	Apolipoprotein B-100	APOB_HUMAN	1	56.527	1.56527	Dengue	QC	NaN	NaN	NaN	91.2577	0.156277
Dengue / QC	_GVYSSDVFDIFPGTYQTLEMFPR_	P00450	0.516309	0.516309	8.29213e-10	3.00652e-09	176	P00450	CP	Ceruloplasmin	CERU_HUMAN	1	43.0291	1.43029	Dengue	QC	NaN	NaN	NaN	78.5452	0.0811463
Dengue / QC	_EHVAHLLFLRDTK_	P19652	1.35079	1.35079	8.3798e-10	3.03563e-09	80	P19652	ORM2	Alpha-1-acid glycoprotein 2	A1AG2_HUMAN	1	155.051	2.55051	Dengue	QC	NaN	NaN	NaN	72.5567	0.186323
Dengue / QC	_TVIGPDGHKEVTK_	P02671	2.86514	2.86514	8.94209e-10	3.22665e-09	106	P02671	FGA	Fibrinogen alpha chain	FIBA_HUMAN	1	628.605	7.28605	Dengue	QC	NaN	NaN	NaN	78.182	0.360617
Dengue / QC	_SVPPSASHVAPTETFTYEWTVPKEVGPTNADPVC[Carbamidomethyl (C)]LAK_	P00450	2.70511	2.70511	9.181e-10	3.30889e-09	70	P00450	CP	Ceruloplasmin	CERU_HUMAN	1	552.109	6.52109	Dengue	QC	NaN	NaN	NaN	48.9972	0.345896
Dengue / QC	_RPVKLLSGGNTLHLVSTTK_	P04114	1.01188	1.01188	9.55111e-10	3.43407e-09	88	P04114	APOB	Apolipoprotein B-100	APOB_HUMAN	1	101.654	2.01654	Dengue	QC	NaN	NaN	NaN	68.7187	0.148073
Dengue / QC	_AQTTVTC[Carbamidomethyl (C)]TEK_	Q02985;Q02985-2	1.16683	1.16683	9.59467e-10	3.44767e-09	72	Q02985;Q02985-2	CFHR3	Complement factor H-related protein 3;Isoform 2 of Complement factor H-related protein 3	FHR3_HUMAN	1	124.518	2.24518	Dengue	QC	NaN	NaN	NaN	36.438	0.141228
Dengue / QC	_LEALPNSLLAPLGR_	P35858;P35858-2	0.471384	0.471384	9.6236e-10	3.45601e-09	86	P35858;P35858-2	IGFALS	Insulin-like growth factor-binding protein complex acid labile subunit;Isoform 2 of Insulin-like growth factor-binding protein complex acid labile subunit	ALS_HUMAN	1	38.6438	1.38644	Dengue	QC	NaN	NaN	NaN	68.389	0.0831534
Dengue / QC	_LKEEIGKELEELR_	P06727	1.17817	1.17817	9.77462e-10	3.50606e-09	44	P06727	APOA4	Apolipoprotein A-IV	APOA4_HUMAN	1	126.29	2.2629	Dengue	QC	NaN	NaN	NaN	34.9064	0.13855
Dengue / QC	_TPFVTHPGYDTGNGIQLPGTSGQQPSVGQQMIFEEHGFR_	P02751;P02751-15;P02751-3;P02751-7	0.615769	0.615769	1.07473e-09	3.82534e-09	106	P02751;P02751-15;P02751-3;P02751-7	FN1	Fibronectin;Isoform 15 of Fibronectin;Isoform 3 of Fibronectin;Isoform 7 of Fibronectin	FINC_HUMAN	1	53.2374	1.53237	Dengue	QC	NaN	NaN	NaN	85.5643	0.0972826
Dengue / QC	_FIAVGYVDDTQFVR_	P05534;P30447	1.88395	1.88395	1.08618e-09	3.86155e-09	22	P05534;P30447	HLA-A	HLA class I histocompatibility antigen, A-24 alpha chain;HLA class I histocompatibility antigen, A-23 alpha chain	1A24_HUMAN;1A23_HUMAN	1	269.083	3.69083	Dengue	QC	NaN	NaN	NaN	15.1011	0.217949
Dengue / QC	_AEDLVGKSLYVSATVILHSGSDMVQAER_	P01024	1.4303	1.4303	1.0969e-09	3.89506e-09	138	P01024	C3	Complement C3	CO3_HUMAN	1	169.502	2.69502	Dengue	QC	NaN	NaN	NaN	105.561	0.175034
Dengue / QC	_ITEVALMGHLSC[Carbamidomethyl (C)]DTKEER_	P04114	0.351159	0.351159	1.20074e-09	4.2388e-09	130	P04114	APOB	Apolipoprotein B-100	APOB_HUMAN	1	27.5585	1.27558	Dengue	QC	NaN	NaN	NaN	90.2823	0.0616347
Dengue / QC	_SGIPIVTSPYQIHFTKTPK_	P01024	1.83996	1.83996	1.22886e-09	4.32796e-09	124	P01024	C3	Complement C3	CO3_HUMAN	1	257.999	3.57999	Dengue	QC	NaN	NaN	NaN	98.6916	0.234667
Dengue / QC	_HSITNPLAVLC[Carbamidomethyl (C)]EFISQSIK_	P04114	0.885575	0.885575	1.24616e-09	4.37865e-09	90	P04114	APOB	Apolipoprotein B-100	APOB_HUMAN	1	84.7501	1.8475	Dengue	QC	NaN	NaN	NaN	84.8282	0.136881
Dengue / QC	_RIPLYYPNAGLTR_	P08519	1.71545	1.71545	1.26883e-09	4.45568e-09	112	P08519	LPA	Apolipoprotein(a)	APOA_HUMAN	1	228.399	3.28399	Dengue	QC	NaN	NaN	NaN	78.8261	0.242743
Dengue / QC	_HTLNQIDEVKVWPQQPSGELFEIEIDTLETTC[Carbamidomethyl (C)]HVLDPTPVAR_	P02765	0.805935	0.805935	1.28093e-09	4.49558e-09	166	P02765	AHSG	Alpha-2-HS-glycoprotein	FETUA_HUMAN	1	74.8279	1.74828	Dengue	QC	NaN	NaN	NaN	75.9743	0.100526
Dengue / QC	_TPC[Carbamidomethyl (C)]TVSC[Carbamidomethyl (C)]NIPVVSGKEC[Carbamidomethyl (C)]EEIIRK_	P02675	2.91985	2.91985	1.29423e-09	4.53958e-09	82	P02675	FGB	Fibrinogen beta chain	FIBB_HUMAN	1	656.77	7.5677	Dengue	QC	NaN	NaN	NaN	59.9208	0.340582
Dengue / QC	_DNENVVNEYSSELEK_	P02675	2.15776	2.15776	1.3285e-09	4.64628e-09	130	P02675	FGB	Fibrinogen beta chain	FIBB_HUMAN	1	346.221	4.46221	Dengue	QC	NaN	NaN	NaN	102.357	0.343838
Dengue / QC	_GGGAGFISGLSYLELDNPAGNK_	P10643	0.85236	0.85236	1.3476e-09	4.70526e-09	112	P10643	C7	Complement component C7	CO7_HUMAN	1	80.5451	1.80545	Dengue	QC	NaN	NaN	NaN	88.0091	0.160123
Dengue / QC	_LLDSLPSDTRLVLLNAIYLSAK_	P05155;P05155-3	0.548215	0.548215	1.34747e-09	4.70526e-09	56	P05155;P05155-3	SERPING1	Plasma protease C1 inhibitor;Isoform 3 of Plasma protease C1 inhibitor	IC1_HUMAN	1	46.2276	1.46228	Dengue	QC	NaN	NaN	NaN	35.7656	0.184266
Dengue / QC	_C[Carbamidomethyl (C)]VGWNGQC[Carbamidomethyl (C)]SGK_	P27918	0.885788	0.885788	1.35271e-09	4.71998e-09	108	P27918	CFP	Properdin	PROP_HUMAN	1	84.7773	1.84777	Dengue	QC	NaN	NaN	NaN	80.4134	0.179708
Dengue / QC	_C[Carbamidomethyl (C)]YFPYLENGYNQNYGR_	P08603	0.513715	0.513715	1.35924e-09	4.74004e-09	120	P08603	CFH	Complement factor H	CFAH_HUMAN	1	42.7722	1.42772	Dengue	QC	NaN	NaN	NaN	76.6721	0.0716667
Dengue / QC	_GVTFLLR_	P04217	-0.498166	0.498166	1.36147e-09	4.74507e-09	172	P04217	A1BG	Alpha-1B-glycoprotein	A1BG_HUMAN	1	-29.1994	0.708006	Dengue	QC	NaN	NaN	NaN	76.847	0.0713876
Dengue / QC	_YKPFSQVPTGEVFYYSC[Carbamidomethyl (C)]EYNFVSPSK_	Q03591	0.671067	0.671067	1.41456e-09	4.91304e-09	116	Q03591	CFHR1	Complement factor H-related protein 1	FHR1_HUMAN	1	59.225	1.59225	Dengue	QC	NaN	NaN	NaN	94.0295	0.0998249
Dengue / QC	_MVQEQC[Carbamidomethyl (C)]C[Carbamidomethyl (C)]HSQLEELHC[Carbamidomethyl (C)]ATGISLANEQDR_	P23142	0.732219	0.732219	1.41842e-09	4.92362e-09	148	P23142	FBLN1	Fibulin-1	FBLN1_HUMAN	1	66.1192	1.66119	Dengue	QC	NaN	NaN	NaN	141.349	0.1066
Dengue / QC	_GLEWVANIK_	P01780	-0.831476	0.831476	1.47162e-09	5.08777e-09	166	P01780	IGHV3-7	Immunoglobulin heavy variable 3-7	HV307_HUMAN	1	-43.8046	0.561954	Dengue	QC	NaN	NaN	NaN	63.9569	0.114906
Dengue / QC	_TMSGLEC[Carbamidomethyl (C)]QAWDSQSPHAHGYIPSKFPNKNLK_	P00747	1.00313	1.00313	1.49504e-09	5.15986e-09	118	P00747	PLG	Plasminogen	PLMN_HUMAN	1	100.435	2.00435	Dengue	QC	NaN	NaN	NaN	105.502	0.13051
Dengue / QC	_VMPIC[Carbamidomethyl (C)]LPSKNYAEVGR_	P00739	1.06975	1.06975	1.51492e-09	5.22547e-09	136	P00739	HPR	Haptoglobin-related protein	HPTR_HUMAN	1	109.906	2.09906	Dengue	QC	NaN	NaN	NaN	114.884	0.146866
Dengue / QC	_ATLELSPWQMSALVQVHASQPSSFHDFPDLGQEVALNANTK_	P04114	1.1238	1.1238	1.53216e-09	5.27588e-09	82	P04114	APOB	Apolipoprotein B-100	APOB_HUMAN	1	117.921	2.17921	Dengue	QC	NaN	NaN	NaN	66.234	0.196732
Dengue / QC	_DMALTAFVLISLQEAKDIC[Carbamidomethyl (C)]EEQVNSLPGSITK_	P01024	1.14851	1.14851	1.62167e-09	5.56814e-09	88	P01024	C3	Complement C3	CO3_HUMAN	1	121.685	2.21685	Dengue	QC	NaN	NaN	NaN	21.248	0.161845
Dengue / QC	_GDIGETGVPGAEGPR_	Q15848	0.440576	0.440576	1.66762e-09	5.70645e-09	118	Q15848	ADIPOQ	Adiponectin	ADIPO_HUMAN	1	35.7146	1.35715	Dengue	QC	NaN	NaN	NaN	70.7422	0.0929925
Dengue / QC	_TTGGKDEEVVQC[Carbamidomethyl (C)]LSDGWSSQPTC[Carbamidomethyl (C)]RK_	P05160	2.70675	2.70675	1.6737e-09	5.72077e-09	20	P05160	F13B	Coagulation factor XIII B chain	F13B_HUMAN	1	552.849	6.52849	Dengue	QC	NaN	NaN	NaN	14.847	0.189911
Dengue / QC	_IYEDHDATQQLQGFYSQVAKPLLVDVDLQYPQDAVLALTQNHHK_	P19827	0.652408	0.652408	1.69547e-09	5.7886e-09	172	P19827	ITIH1	Inter-alpha-trypsin inhibitor heavy chain H1	ITIH1_HUMAN	1	57.179	1.57179	Dengue	QC	NaN	NaN	NaN	110.665	0.0824795
Dengue / QC	_SVPSDIFQIQATTIYANTINTFR_	Q12805;Q12805-2;Q12805-4	1.21453	1.21453	1.69913e-09	5.79781e-09	74	Q12805;Q12805-2;Q12805-4	EFEMP1	EGF-containing fibulin-like extracellular matrix protein 1;Isoform 2 of EGF-containing fibulin-like extracellular matrix protein 1;Isoform 4 of EGF-containing fibulin-like extracellular matrix protein 1	FBLN3_HUMAN	1	132.064	2.32064	Dengue	QC	NaN	NaN	NaN	48.894	0.201934
Dengue / QC	_ALQTEMAR_	P11226	1.91863	1.91863	1.71169e-09	5.83738e-09	26	P11226	MBL2	Mannose-binding protein C	MBL2_HUMAN	1	278.063	3.78063	Dengue	QC	NaN	NaN	NaN	16.9247	0.141611
Dengue / QC	_QLYNVEATSYALLALLQLKDFDFVPPVVR_	P01024	0.935951	0.935951	1.75085e-09	5.96753e-09	82	P01024	C3	Complement C3	CO3_HUMAN	1	91.3152	1.91315	Dengue	QC	NaN	NaN	NaN	31.0833	0.150505
Dengue / QC	_LELELRPTGEIEQYSVSATYELQREDR_	P04114	0.596225	0.596225	1.75328e-09	5.97247e-09	164	P04114	APOB	Apolipoprotein B-100	APOB_HUMAN	1	51.1756	1.51176	Dengue	QC	NaN	NaN	NaN	96.7695	0.0880635
Dengue / QC	_FTEDAKR_	P01011	1.1183	1.1183	1.81052e-09	6.16047e-09	78	P01011	SERPINA3	Alpha-1-antichymotrypsin	AACT_HUMAN	1	117.091	2.17091	Dengue	QC	NaN	NaN	NaN	52.9214	0.15967
Dengue / QC	_LYPIANGNNQSPVDIK_	P00915	1.17819	1.17819	1.84142e-09	6.255e-09	54	P00915	CA1	Carbonic anhydrase 1	CAH1_HUMAN	1	126.292	2.26292	Dengue	QC	NaN	NaN	NaN	41.8704	0.155361
Dengue / QC	_KC[Carbamidomethyl (C)]YFPYLENGYNQNHGRK_	Q5TFM2	2.33139	2.33139	1.84885e-09	6.27671e-09	38	Q5TFM2	CFH	Complement factor H	Q5TFM2_HUMAN	1	403.291	5.03291	Dengue	QC	NaN	NaN	NaN	32.4337	0.291799
Dengue / QC	_MMAVAADTLQR_	Q96KN2	0.69075	0.69075	1.8501e-09	6.27742e-09	16	Q96KN2	CNDP1	Beta-Ala-His dipeptidase	CNDP1_HUMAN	1	61.4123	1.61412	Dengue	QC	NaN	NaN	NaN	7.3448	0.202979
Dengue / QC	_IPLYYPNAGLTR_	P08519	1.14967	1.14967	1.87414e-09	6.35185e-09	90	P08519	LPA	Apolipoprotein(a)	APOA_HUMAN	1	121.864	2.21864	Dengue	QC	NaN	NaN	NaN	75.2459	0.177101
Dengue / QC	_SILQM[Oxidation (M)]SLDHHIVTPLTSLVIENEAGDER_	P19823	0.891242	0.891242	1.94654e-09	6.57871e-09	130	P19823	ITIH2	Inter-alpha-trypsin inhibitor heavy chain H2	ITIH2_HUMAN	1	85.4772	1.85477	Dengue	QC	NaN	NaN	NaN	92.6332	0.16037
Dengue / QC	_TIVTTLQDSIR_	P07996	0.512102	0.512102	2.0708e-09	6.97909e-09	102	P07996	THBS1	Thrombospondin-1	TSP1_HUMAN	1	42.6126	1.42613	Dengue	QC	NaN	NaN	NaN	92.5022	0.0939472
Dengue / QC	_C[Carbamidomethyl (C)]HTC[Carbamidomethyl (C)]QNGGTVILMDGK_	P02748	0.304425	0.304425	2.14836e-09	7.22032e-09	32	P02748	C9	Complement component C9	CO9_HUMAN	1	23.4926	1.23493	Dengue	QC	NaN	NaN	NaN	17.4621	0.22029
Dengue / QC	_SYTVAIAGYALAQMGRLKGPLLNK_	P01024	0.678575	0.678575	2.16156e-09	7.25659e-09	132	P01024	C3	Complement C3	CO3_HUMAN	1	60.0558	1.60056	Dengue	QC	NaN	NaN	NaN	90.1211	0.0916954
Dengue / QC	_LLIYSNNQR_	P01699	1.35297	1.35297	2.21548e-09	7.41694e-09	62	P01699	IGLV1-44	Immunoglobulin lambda variable 1-44	LV144_HUMAN	1	155.437	2.55437	Dengue	QC	NaN	NaN	NaN	52.379	0.18781
Dengue / QC	_VGVETTKPSK_	A0M8Q6	1.23774	1.23774	2.2177e-09	7.42026e-09	122	A0M8Q6	IGLC7	Immunoglobulin lambda constant 7	IGLC7_HUMAN	1	135.829	2.35829	Dengue	QC	NaN	NaN	NaN	72.5518	0.243659
Dengue / QC	_AFQPFFVELTMPYSVIRGEAFTLKATVLNYLPK_	P01023	1.39434	1.39434	2.21979e-09	7.42312e-09	58	P01023	A2M	Alpha-2-macroglobulin	A2MG_HUMAN	1	162.868	2.62868	Dengue	QC	NaN	NaN	NaN	48.5812	0.173493
Dengue / QC	_QGQGQSEPGEYEQR_	P43121	1.19437	1.19437	2.28106e-09	7.62378e-09	26	P43121	MCAM	Cell surface glycoprotein MUC18	MUC18_HUMAN	1	128.845	2.28845	Dengue	QC	NaN	NaN	NaN	19.6041	0.246613
Dengue / QC	_FKDLGEENFKALVLIAFAQYLQQC[Carbamidomethyl (C)]PFEDHVK_	P02768	0.756269	0.756269	2.37492e-09	7.91991e-09	176	P02768	ALB	Serum albumin	ALBU_HUMAN	1	68.9117	1.68912	Dengue	QC	NaN	NaN	NaN	127.511	0.0942461
Dengue / QC	_QAMGELSELSFHYLIMAK_	P20742	3.76097	3.76097	2.3781e-09	7.92613e-09	18	P20742	PZP	Pregnancy zone protein	PZP_HUMAN	1	1255.71	13.5571	Dengue	QC	NaN	NaN	NaN	7.86974	0.0968178
Dengue / QC	_YDYC[Carbamidomethyl (C)]DILEC[Carbamidomethyl (C)]EEEC[Carbamidomethyl (C)]MHC[Carbamidomethyl (C)]SGENYDGKISK_	P00747	1.87138	1.87138	2.44746e-09	8.14827e-09	78	P00747	PLG	Plasminogen	PLMN_HUMAN	1	265.883	3.65883	Dengue	QC	NaN	NaN	NaN	58.6432	0.247544
Dengue / QC	_MGVSWIR_	A0A0B4J1V2	-0.660481	0.660481	2.49082e-09	8.28807e-09	164	A0A0B4J1V2	IGHV2-26	Immunoglobulin heavy variable 2-26	HV226_HUMAN	1	-36.7333	0.632667	Dengue	QC	NaN	NaN	NaN	85.5441	0.0980052
Dengue / QC	_ALVLIAFAQYLQQC[Carbamidomethyl (C)]PFEDHVKLVNEVTEFAK_	P02768	0.740055	0.740055	2.59274e-09	8.61293e-09	170	P02768	ALB	Serum albumin	ALBU_HUMAN	1	67.0239	1.67024	Dengue	QC	NaN	NaN	NaN	139.341	0.103461
Dengue / QC	_TTMKIIPFNRLTIGEGQQHHLGGAK_	P02679;P02679-2	2.42215	2.42215	2.60019e-09	8.63292e-09	32	P02679;P02679-2	FGG	Fibrinogen gamma chain;Isoform Gamma-A of Fibrinogen gamma chain	FIBG_HUMAN	1	435.97	5.3597	Dengue	QC	NaN	NaN	NaN	22.0274	0.215122
Dengue / QC	_ANSFLGEK_	A0A140TA49	0.581675	0.581675	2.65745e-09	8.81817e-09	126	A0A140TA49	C4A	Complement C4-A	A0A140TA49_HUMAN	1	49.6586	1.49659	Dengue	QC	NaN	NaN	NaN	84.7773	0.0980149
Dengue / QC	_TFGSGEADC[Carbamidomethyl (C)]GLRPLFEKK_	P00734	0.967668	0.967668	2.66182e-09	8.82781e-09	160	P00734	F2	Prothrombin	THRB_HUMAN	1	95.5677	1.95568	Dengue	QC	NaN	NaN	NaN	150.098	0.121191
Dengue / QC	_SSVAAMHWMDGSVVTR_	P22891;P22891-2	0.782862	0.782862	2.71758e-09	9.00778e-09	72	P22891;P22891-2	PROZ	Vitamin K-dependent protein Z;Isoform 2 of Vitamin K-dependent protein Z	PROZ_HUMAN	1	72.0541	1.72054	Dengue	QC	NaN	NaN	NaN	31.6099	0.124004
Dengue / QC	_C[Carbamidomethyl (C)]VYLQTSMK_	P20742	3.59358	3.59358	2.82736e-09	9.35107e-09	42	P20742	PZP	Pregnancy zone protein	PZP_HUMAN	1	1107.19	12.0719	Dengue	QC	NaN	NaN	NaN	35.9701	0.491637
Dengue / QC	_NTDEDKWGDAC[Carbamidomethyl (C)]DNC[Carbamidomethyl (C)]R_	G3XAP6;P49747	1.63382	1.63382	2.84461e-09	9.40298e-09	66	G3XAP6;P49747	COMP	Cartilage oligomeric matrix protein	G3XAP6_HUMAN;COMP_HUMAN	1	210.333	3.10333	Dengue	QC	NaN	NaN	NaN	55.263	0.267241
Dengue / QC	_ITINPDTSKNQFSLQLNSVTPEDTAVYYC[Carbamidomethyl (C)]AR_	A0A0B4J1U7	1.24909	1.24909	2.93502e-09	9.68059e-09	38	A0A0B4J1U7	IGHV6-1	Immunoglobulin heavy variable 6-1	HV601_HUMAN	1	137.691	2.37691	Dengue	QC	NaN	NaN	NaN	31.3393	0.2223
Dengue / QC	_WTPPRAQITGYRLTVGLTR_	P02751;P02751-15;P02751-3;P02751-7	2.02945	2.02945	3.0276e-09	9.96411e-09	62	P02751;P02751-15;P02751-3;P02751-7	FN1	Fibronectin;Isoform 15 of Fibronectin;Isoform 3 of Fibronectin;Isoform 7 of Fibronectin	FINC_HUMAN	1	308.249	4.08249	Dengue	QC	NaN	NaN	NaN	50.1051	0.262233
Dengue / QC	_QGENGQMMSC[Carbamidomethyl (C)]TC[Carbamidomethyl (C)]LGNGK_	P02751;P02751-15;P02751-3;P02751-7	1.34659	1.34659	3.04324e-09	1.00047e-08	26	P02751;P02751-15;P02751-3;P02751-7	FN1	Fibronectin;Isoform 15 of Fibronectin;Isoform 3 of Fibronectin;Isoform 7 of Fibronectin	FINC_HUMAN	1	154.31	2.5431	Dengue	QC	NaN	NaN	NaN	17.2562	0.20536
Dengue / QC	_FQVDNNNR_	P01023	-0.542247	0.542247	3.0491e-09	1.00185e-08	176	P01023	A2M	Alpha-2-macroglobulin	A2MG_HUMAN	1	-31.33	0.6867	Dengue	QC	NaN	NaN	NaN	96.877	0.0865405
Dengue / QC	_VGYVSGWGQSDNFKLTDHLK_	P00739	1.01601	1.01601	3.07459e-09	1.00857e-08	146	P00739	HPR	Haptoglobin-related protein	HPTR_HUMAN	1	102.232	2.02232	Dengue	QC	NaN	NaN	NaN	111.954	0.140831
Dengue / QC	_GM[Oxidation (M)]TNINDGLLR_	Q06033;Q06033-2	0.793508	0.793508	3.08425e-09	1.01081e-08	28	Q06033;Q06033-2	ITIH3	Inter-alpha-trypsin inhibitor heavy chain H3;Isoform 2 of Inter-alpha-trypsin inhibitor heavy chain H3	ITIH3_HUMAN	1	73.3284	1.73328	Dengue	QC	NaN	NaN	NaN	19.3531	0.219148
Dengue / QC	_SDGSENFNR_	Q08830	1.59147	1.59147	3.23734e-09	1.05736e-08	28	Q08830	FGL1	Fibrinogen-like protein 1	FGL1_HUMAN	1	201.357	3.01357	Dengue	QC	NaN	NaN	NaN	21.8663	0.183624
Dengue / QC	_DSGVPDRFSGSGSGTDFTLK_	P06310	-0.47873	0.47873	3.24051e-09	1.05754e-08	176	P06310	IGKV2-30	Immunoglobulin kappa variable 2-30	KV230_HUMAN	1	-28.2391	0.717609	Dengue	QC	NaN	NaN	NaN	103.175	0.0699156
Dengue / QC	_SQDILLSVENTVIYR_	P07225	0.800947	0.800947	3.24739e-09	1.05892e-08	116	P07225	PROS1	Vitamin K-dependent protein S	PROS_HUMAN	1	74.2245	1.74224	Dengue	QC	NaN	NaN	NaN	78.5748	0.114615
Dengue / QC	_ALEWLAR_	A0A0C4DH43	-0.644086	0.644086	3.29459e-09	1.07315e-08	168	A0A0C4DH43	IGHV2-70D	Immunoglobulin heavy variable 2-70D	HV70D_HUMAN	1	-36.0102	0.639898	Dengue	QC	NaN	NaN	NaN	73.9434	0.0980614
Dengue / QC	_GPTQDFR_	P20742	3.82139	3.82139	3.29788e-09	1.07364e-08	36	P20742	PZP	Pregnancy zone protein	PZP_HUMAN	1	1313.69	14.1369	Dengue	QC	NaN	NaN	NaN	26.9853	0.46404
Dengue / QC	_AVLTIDEK_	P01009	-0.609252	0.609252	3.33782e-09	1.08605e-08	176	P01009	SERPINA1	Alpha-1-antitrypsin	A1AT_HUMAN	1	-34.4463	0.655537	Dengue	QC	NaN	NaN	NaN	65.4249	0.086509
Dengue / QC	_KVFLDC[Carbamidomethyl (C)]C[Carbamidomethyl (C)]NYITELRR_	P01024	0.602889	0.602889	3.34957e-09	1.08929e-08	80	P01024	C3	Complement C3	CO3_HUMAN	1	51.8754	1.51875	Dengue	QC	NaN	NaN	NaN	68.3317	0.094807
Dengue / QC	_KLFDYC[Carbamidomethyl (C)]DIPLC[Carbamidomethyl (C)]ASSSFDC[Carbamidomethyl (C)]GKPQVEPK_	P08519	1.77144	1.77144	3.4022e-09	1.10521e-08	46	P08519	LPA	Apolipoprotein(a)	APOA_HUMAN	1	241.394	3.41394	Dengue	QC	NaN	NaN	NaN	39.5859	0.23082
Dengue / QC	_RGYQLSDVDGVTC[Carbamidomethyl (C)]EDIDEC[Carbamidomethyl (C)]ALPTGGHIC[Carbamidomethyl (C)]SYR_	P23142	1.30351	1.30351	3.4105e-09	1.10731e-08	126	P23142	FBLN1	Fibulin-1	FBLN1_HUMAN	1	146.829	2.46829	Dengue	QC	NaN	NaN	NaN	94.5925	0.230938
Dengue / QC	_LAKTYETTLEKC[Carbamidomethyl (C)]C[Carbamidomethyl (C)]AAADPHEC[Carbamidomethyl (C)]YAK_	P02768	2.04424	2.04424	3.46098e-09	1.12252e-08	150	P02768	ALB	Serum albumin	ALBU_HUMAN	1	312.455	4.12455	Dengue	QC	NaN	NaN	NaN	116.467	0.32156
Dengue / QC	_DSMIWDC[Carbamidomethyl (C)]TC[Carbamidomethyl (C)]IGAGR_	P02751;P02751-15;P02751-3;P02751-7	0.745218	0.745218	3.46108e-09	1.12252e-08	154	P02751;P02751-15;P02751-3;P02751-7	FN1	Fibronectin;Isoform 15 of Fibronectin;Isoform 3 of Fibronectin;Isoform 7 of Fibronectin	FINC_HUMAN	1	67.6228	1.67623	Dengue	QC	NaN	NaN	NaN	139.14	0.115936
Dengue / QC	_KC[Carbamidomethyl (C)]YFPYLENGYNQNYGRK_	P08603	0.78228	0.78228	3.4743e-09	1.12621e-08	138	P08603	CFH	Complement factor H	CFAH_HUMAN	1	71.9847	1.71985	Dengue	QC	NaN	NaN	NaN	111.145	0.0974615
Dengue / QC	_NSLLGMEGANSIFSGFLLFPDMEA_	D6R934;P02746	2.51082	2.51082	3.51001e-09	1.13717e-08	38	D6R934;P02746	C1QB	Complement C1q subcomponent subunit B	D6R934_HUMAN;C1QB_HUMAN	1	469.945	5.69945	Dengue	QC	NaN	NaN	NaN	23.9708	0.313868
Dengue / QC	_EPAHLMSLFGGKPMIIYKGGTSR_	P06396	0.555293	0.555293	3.55666e-09	1.15104e-08	96	P06396	GSN	Gelsolin	GELS_HUMAN	1	46.9467	1.46947	Dengue	QC	NaN	NaN	NaN	86.2085	0.113788
Dengue / QC	_RLDYQEGPPGVEISC[Carbamidomethyl (C)]WSVEL_	Q14624	0.813589	0.813589	3.57174e-09	1.15468e-08	174	Q14624	ITIH4	Inter-alpha-trypsin inhibitor heavy chain H4	ITIH4_HUMAN	1	75.7578	1.75758	Dengue	QC	NaN	NaN	NaN	80.5526	0.111414
Dengue / QC	_VTISVDK_	A0A075B6R2	0.754829	0.754829	3.59978e-09	1.16312e-08	102	A0A075B6R2	IGHV4-4	Immunoglobulin heavy variable 4-4	HV404_HUMAN	1	68.7431	1.68743	Dengue	QC	NaN	NaN	NaN	88.7701	0.108315
Dengue / QC	_QYADC[Carbamidomethyl (C)]SEIFNDGYK_	Q08830	0.988246	0.988246	3.68603e-09	1.18781e-08	26	Q08830	FGL1	Fibrinogen-like protein 1	FGL1_HUMAN	1	98.3772	1.98377	Dengue	QC	NaN	NaN	NaN	20.9822	0.221184
Dengue / QC	_DTEEEDFHVDQATTVKVPMMK_	A0A024R6I7	0.725181	0.725181	3.80423e-09	1.22198e-08	118	A0A024R6I7	SERPINA1	Alpha-1-antitrypsin	A0A024R6I7_HUMAN	1	65.3108	1.65311	Dengue	QC	NaN	NaN	NaN	107.299	0.100384
Dengue / QC	_KFPSGTFEQVSQLVKEVVSLTEAC[Carbamidomethyl (C)]C[Carbamidomethyl (C)]AEGADPDC[Carbamidomethyl (C)]YDTR_	P02774;P02774-3	4.51372	4.51372	3.80684e-09	1.22216e-08	42	P02774;P02774-3	GC	Vitamin D-binding protein;Isoform 3 of Vitamin D-binding protein	VTDB_HUMAN	1	2184.36	22.8436	Dengue	QC	NaN	NaN	NaN	32.821	0.544796
Dengue / QC	_DYNLNDILLQLGIEEAFTSK_	P01011	1.3755	1.3755	3.8212e-09	1.22612e-08	144	P01011	SERPINA3	Alpha-1-antichymotrypsin	AACT_HUMAN	1	159.458	2.59458	Dengue	QC	NaN	NaN	NaN	59.7302	0.174684
Dengue / QC	_LSGALHVYSLGSD_	P80108	0.821725	0.821725	3.83854e-09	1.23103e-08	56	P80108	GPLD1	Phosphatidylinositol-glycan-specific phospholipase D	PHLD_HUMAN	1	76.7518	1.76752	Dengue	QC	NaN	NaN	NaN	40.914	0.10128
Dengue / QC	_SLFTDLVAEK_	P20742	3.16971	3.16971	3.85874e-09	1.23685e-08	46	P20742	PZP	Pregnancy zone protein	PZP_HUMAN	1	799.867	8.99867	Dengue	QC	NaN	NaN	NaN	37.7368	0.454313
Dengue / QC	_AVNRADTAKEVSFDVELPK_	Q06033;Q06033-2	1.14212	1.14212	3.96492e-09	1.26953e-08	106	Q06033;Q06033-2	ITIH3	Inter-alpha-trypsin inhibitor heavy chain H3;Isoform 2 of Inter-alpha-trypsin inhibitor heavy chain H3	ITIH3_HUMAN	1	120.705	2.20705	Dengue	QC	NaN	NaN	NaN	85.0647	0.169892
Dengue / QC	_ANVFVQLPR_	P35858;P35858-2	0.966047	0.966047	4.03262e-09	1.28915e-08	44	P35858;P35858-2	IGFALS	Insulin-like growth factor-binding protein complex acid labile subunit;Isoform 2 of Insulin-like growth factor-binding protein complex acid labile subunit	ALS_HUMAN	1	95.3481	1.95348	Dengue	QC	NaN	NaN	NaN	36.3774	0.105582
Dengue / QC	_IALGGLLFPASNLRLPLVPALDGC[Carbamidomethyl (C)]LR_	I3L145;P04278	1.04642	1.04642	4.08608e-09	1.30486e-08	50	I3L145;P04278	SHBG	Sex hormone-binding globulin	I3L145_HUMAN;SHBG_HUMAN	1	106.54	2.0654	Dengue	QC	NaN	NaN	NaN	43.3336	0.176535
Dengue / QC	_NLNEKDYELLC[Carbamidomethyl (C)]LDGTRK_	P02787	1.67881	1.67881	4.10159e-09	1.30912e-08	90	P02787	TF	Serotransferrin	TRFE_HUMAN	1	220.163	3.20163	Dengue	QC	NaN	NaN	NaN	49.3912	0.218257
Dengue / QC	_GGETSEMYLIQPDSSVKPYR_	P02675	2.34988	2.34988	4.17297e-09	1.33049e-08	132	P02675	FGB	Fibrinogen beta chain	FIBB_HUMAN	1	409.783	5.09783	Dengue	QC	NaN	NaN	NaN	106.809	0.342326
Dengue / QC	_TLVLLMGK_	P07737	1.18643	1.18643	4.20823e-09	1.34078e-08	44	P07737	PFN1	Profilin-1	PROF1_HUMAN	1	127.589	2.27589	Dengue	QC	NaN	NaN	NaN	31.1439	0.168663
Dengue / QC	_QEALELMNQNLDIYEQQVMTAAQK_	P43251;P43251-2;P43251-3;P43251-4	0.939965	0.939965	4.23215e-09	1.34722e-08	38	P43251;P43251-2;P43251-3;P43251-4	BTD	Biotinidase;Isoform 2 of Biotinidase;Isoform 3 of Biotinidase;Isoform 4 of Biotinidase	BTD_HUMAN	1	91.8482	1.91848	Dengue	QC	NaN	NaN	NaN	19.4002	0.125426
Dengue / QC	_MAESGYDIALLK_	P03951	1.48184	1.48184	4.45116e-09	1.41321e-08	44	P03951	F11	Coagulation factor XI	FA11_HUMAN	1	179.305	2.79305	Dengue	QC	NaN	NaN	NaN	27.1349	0.182469
Dengue / QC	_GYQLSDVDGVTC[Carbamidomethyl (C)]EDIDEC[Carbamidomethyl (C)]ALPTGGHIC[Carbamidomethyl (C)]SYR_	P23142	0.909095	0.909095	4.44937e-09	1.41321e-08	124	P23142	FBLN1	Fibulin-1	FBLN1_HUMAN	1	87.7868	1.87787	Dengue	QC	NaN	NaN	NaN	99.1232	0.120784
Dengue / QC	_LKFIIPSPK_	P04114	0.513145	0.513145	4.54013e-09	1.4407e-08	66	P04114	APOB	Apolipoprotein B-100	APOB_HUMAN	1	42.7158	1.42716	Dengue	QC	NaN	NaN	NaN	54.3734	0.0853298
Dengue / QC	_MGPTELLIEMEDWK_	P02675	2.99351	2.99351	4.55858e-09	1.44579e-08	42	P02675	FGB	Fibrinogen beta chain	FIBB_HUMAN	1	696.41	7.9641	Dengue	QC	NaN	NaN	NaN	27.9127	0.339175
Dengue / QC	_GTVIDVTDFVNWASSINDAPVLISQK_	P02748	0.582954	0.582954	4.72348e-09	1.49337e-08	124	P02748	C9	Complement component C9	CO9_HUMAN	1	49.7913	1.49791	Dengue	QC	NaN	NaN	NaN	112.696	0.102253
Dengue / QC	_VGDTYERPKDSMIWDC[Carbamidomethyl (C)]TC[Carbamidomethyl (C)]IGAGR_	P02751;P02751-15;P02751-3;P02751-7	2.0155	2.0155	4.76311e-09	1.50511e-08	44	P02751;P02751-15;P02751-3;P02751-7	FN1	Fibronectin;Isoform 15 of Fibronectin;Isoform 3 of Fibronectin;Isoform 7 of Fibronectin	FINC_HUMAN	1	304.319	4.04319	Dengue	QC	NaN	NaN	NaN	37.914	0.294338
Dengue / QC	_TVIEVDERGTEAVAGILSEITAYSMPPVIK_	G3V2W1;Q9UK55	1.28083	1.28083	4.82742e-09	1.52384e-08	26	G3V2W1;Q9UK55	SERPINA10	Protein Z-dependent protease inhibitor	G3V2W1_HUMAN;ZPI_HUMAN	1	142.978	2.42978	Dengue	QC	NaN	NaN	NaN	12.3683	0.0969036
Dengue / QC	_HQSAC[Carbamidomethyl (C)]KDSDWPFC[Carbamidomethyl (C)]SDEDWNYKC[Carbamidomethyl (C)]PSGC[Carbamidomethyl (C)]R_	P02671	1.83579	1.83579	4.86229e-09	1.53244e-08	42	P02671	FGA	Fibrinogen alpha chain	FIBA_HUMAN	1	256.967	3.56967	Dengue	QC	NaN	NaN	NaN	36.635	0.239108
Dengue / QC	_NIETIINTFHQYSVK_	P06702	2.69992	2.69992	4.88922e-09	1.53851e-08	68	P06702	S100A9	Protein S100-A9	S10A9_HUMAN	1	549.768	6.49768	Dengue	QC	NaN	NaN	NaN	50.9237	0.221953
Dengue / QC	_KLLETEC[Carbamidomethyl (C)]PQYIR_	P05109	1.16703	1.16703	5.22782e-09	1.63651e-08	32	P05109	S100A8	Protein S100-A8	S10A8_HUMAN	1	124.549	2.24549	Dengue	QC	NaN	NaN	NaN	26.2713	0.193637
Dengue / QC	_GLVWVSR_	A0A075B7E8	-0.573484	0.573484	5.28545e-09	1.65112e-08	176	A0A075B7E8	IGHV3OR16-13	Immunoglobulin heavy variable 3/OR16-13 (non-functional) (Fragment)	A0A075B7E8_HUMAN	1	-32.8008	0.671992	Dengue	QC	NaN	NaN	NaN	64.601	0.0844277
Dengue / QC	_C[Carbamidomethyl (C)]STSPLLEAC[Carbamidomethyl (C)]EFLRK_	E7ER44;P02788	2.46053	2.46053	5.30253e-09	1.6556e-08	28	E7ER44;P02788	LTF	Lactotransferrin	E7ER44_HUMAN;TRFL_HUMAN	1	450.419	5.50419	Dengue	QC	NaN	NaN	NaN	20.4071	0.270619
Dengue / QC	_HPYTGPSC[Carbamidomethyl (C)]SQVVPVC[Carbamidomethyl (C)]RPNPC[Carbamidomethyl (C)]QNGATC[Carbamidomethyl (C)]SR_	Q14520;Q14520-2	0.929705	0.929705	5.33326e-09	1.66347e-08	30	Q14520;Q14520-2	HABP2	Hyaluronan-binding protein 2;Isoform 2 of Hyaluronan-binding protein 2	HABP2_HUMAN	1	90.4887	1.90489	Dengue	QC	NaN	NaN	NaN	25.2167	0.123298
Dengue / QC	_VYPGEQYTYM[Oxidation (M)]LLATEEQSPGEGDGNC[Carbamidomethyl (C)]VTR_	P00450	0.071412	0.071412	5.42415e-09	1.69094e-08	124	P00450	CP	Ceruloplasmin	CERU_HUMAN	1	5.07446	1.05074	Dengue	QC	NaN	NaN	NaN	50.5107	0.515431
Dengue / QC	_KNPREDYLDVYVFGVGPLVNQVNINALASK_	B4E1Z4	0.658064	0.658064	5.46264e-09	1.70206e-08	146	B4E1Z4	NaN	cDNA FLJ55673, highly similar to Complement factor B (EC 3.4.21.47)	B4E1Z4_HUMAN	1	57.7964	1.57796	Dengue	QC	NaN	NaN	NaN	110.646	0.103798
Dengue / QC	_FVTWIEGVMR_	P00747	0.219938	0.219938	5.48395e-09	1.70694e-08	136	P00747	PLG	Plasminogen	PLMN_HUMAN	1	16.4683	1.16468	Dengue	QC	NaN	NaN	NaN	102.689	0.091928
Dengue / QC	_QC[Carbamidomethyl (C)]QDLGAFTESMVVFGC[Carbamidomethyl (C)]PN_	P01024	0.767758	0.767758	5.49246e-09	1.7087e-08	152	P01024	C3	Complement C3	CO3_HUMAN	1	70.2622	1.70262	Dengue	QC	NaN	NaN	NaN	85.1569	0.0892491
Dengue / QC	_KYPVAHFIDQTLKAK_	P05155;P05155-3	1.21603	1.21603	5.62452e-09	1.74888e-08	46	P05155;P05155-3	SERPING1	Plasma protease C1 inhibitor;Isoform 3 of Plasma protease C1 inhibitor	IC1_HUMAN	1	132.307	2.32307	Dengue	QC	NaN	NaN	NaN	23.1546	0.113025
Dengue / QC	_GISSTTVTGR_	P08519	1.82112	1.82112	5.70234e-09	1.77216e-08	82	P08519	LPA	Apolipoprotein(a)	APOA_HUMAN	1	253.355	3.53355	Dengue	QC	NaN	NaN	NaN	69.8842	0.262865
Dengue / QC	_C[Carbamidomethyl (C)]QFFTYSLLPEDC[Carbamidomethyl (C)]KEEK_	H0YAC1;P03952	0.591034	0.591034	5.72902e-09	1.77954e-08	158	H0YAC1;P03952	KLKB1	Plasma kallikrein (Fragment);Plasma kallikrein	H0YAC1_HUMAN;KLKB1_HUMAN	1	50.6326	1.50633	Dengue	QC	NaN	NaN	NaN	125.411	0.0832959
Dengue / QC	_YRGDQDATMSILDISM[Oxidation (M)]MTGFAPDTDDLKQLANGVDR_	P01024	0.650391	0.650391	5.94354e-09	1.84238e-08	24	P01024	C3	Complement C3	CO3_HUMAN	1	56.9594	1.56959	Dengue	QC	NaN	NaN	NaN	12.7544	0.080567
Dengue / QC	_GNPAVSYVR_	Q9Y6R7	1.05316	1.05316	6.00182e-09	1.85948e-08	114	Q9Y6R7	FCGBP	IgGFc-binding protein	FCGBP_HUMAN	1	107.508	2.07508	Dengue	QC	NaN	NaN	NaN	100.698	0.174154
Dengue / QC	_TPFVTHPGYDTGNGIQLPGTSGQQPSVGQQMIFEEHGFRR_	P02751;P02751-15;P02751-3;P02751-7	0.589772	0.589772	6.06283e-09	1.87453e-08	150	P02751;P02751-15;P02751-3;P02751-7	FN1	Fibronectin;Isoform 15 of Fibronectin;Isoform 3 of Fibronectin;Isoform 7 of Fibronectin	FINC_HUMAN	1	50.5009	1.50501	Dengue	QC	NaN	NaN	NaN	107.594	0.089542
Dengue / QC	_DVYKAGEQVTYTC[Carbamidomethyl (C)]ATYYK_	P08603	0.721577	0.721577	6.06168e-09	1.87453e-08	92	P08603	CFH	Complement factor H	CFAH_HUMAN	1	64.8984	1.64898	Dengue	QC	NaN	NaN	NaN	85.9222	0.110722
Dengue / QC	_EEM[Oxidation (M)]TKNQVSLTC[Carbamidomethyl (C)]LVK_	P01860	2.44838	2.44838	6.3148e-09	1.9479e-08	120	P01860	IGHG3	Immunoglobulin heavy constant gamma 3	IGHG3_HUMAN	1	445.801	5.45801	Dengue	QC	NaN	NaN	NaN	81.517	0.260079
Dengue / QC	_EHAVEGDC[Carbamidomethyl (C)]DFQLLKLDGK_	P02765	0.90222	0.90222	6.55277e-09	2.01419e-08	174	P02765	AHSG	Alpha-2-HS-glycoprotein	FETUA_HUMAN	1	86.894	1.86894	Dengue	QC	NaN	NaN	NaN	165.677	0.129715
Dengue / QC	_SLWDFLK_	P04114	0.59802	0.59802	6.65225e-09	2.0421e-08	104	P04114	APOB	Apolipoprotein B-100	APOB_HUMAN	1	51.3638	1.51364	Dengue	QC	NaN	NaN	NaN	69.1642	0.125385
Dengue / QC	_VKIDQTVEELR_	P06727	1.17028	1.17028	6.65595e-09	2.0422e-08	38	P06727	APOA4	Apolipoprotein A-IV	APOA4_HUMAN	1	125.055	2.25055	Dengue	QC	NaN	NaN	NaN	30.8357	0.154618
Dengue / QC	_SSSGLTYIAEWK_	P33908	1.07142	1.07142	6.70895e-09	2.05741e-08	26	P33908	MAN1A1	Mannosyl-oligosaccharide 1,2-alpha-mannosidase IA	MA1A1_HUMAN	1	110.151	2.10151	Dengue	QC	NaN	NaN	NaN	16.3292	0.0980797
Dengue / QC	_MYLGYEYVTAIRNLR_	P02787	2.51515	2.51515	6.97441e-09	2.13447e-08	78	P02787	TF	Serotransferrin	TRFE_HUMAN	1	471.657	5.71657	Dengue	QC	NaN	NaN	NaN	65.8632	0.261129
Dengue / QC	_TFYEPGEEITYSC[Carbamidomethyl (C)]K_	P02749	0.676442	0.676442	7.10528e-09	2.17039e-08	78	P02749	APOH	Beta-2-glycoprotein 1	APOH_HUMAN	1	59.8193	1.59819	Dengue	QC	NaN	NaN	NaN	41.0578	0.101947
Dengue / QC	_SC[Carbamidomethyl (C)]RPNDVTC[Carbamidomethyl (C)]VFDPVHTISHTVISLPTFR_	P23142	0.775961	0.775961	7.20018e-09	2.19687e-08	144	P23142	FBLN1	Fibulin-1	FBLN1_HUMAN	1	71.233	1.71233	Dengue	QC	NaN	NaN	NaN	131.948	0.158404
Dengue / QC	_GSQTVSYTR_	Q9Y6R7	0.860386	0.860386	7.32765e-09	2.23283e-08	38	Q9Y6R7	FCGBP	IgGFc-binding protein	FCGBP_HUMAN	1	81.5524	1.81552	Dengue	QC	NaN	NaN	NaN	29.4659	0.138436
Dengue / QC	_SLEVTFTPVIEDIGK_	P19320	0.836295	0.836295	7.39525e-09	2.25069e-08	46	P19320	VCAM1	Vascular cell adhesion protein 1	VCAM1_HUMAN	1	78.5459	1.78546	Dengue	QC	NaN	NaN	NaN	38.4877	0.160971
Dengue / QC	_TGESAEFVC[Carbamidomethyl (C)]K_	Q03591	0.72716	0.72716	7.5733e-09	2.3014e-08	142	Q03591	CFHR1	Complement factor H-related protein 1	FHR1_HUMAN	1	65.5377	1.65538	Dengue	QC	NaN	NaN	NaN	117.979	0.122549
Dengue / QC	_EEAPSLRPAPPPISGGGYR_	P02675	2.60769	2.60769	7.70288e-09	2.3396e-08	110	P02675	FGB	Fibrinogen beta chain	FIBB_HUMAN	1	509.526	6.09526	Dengue	QC	NaN	NaN	NaN	92.3244	0.361374
Dengue / QC	_LLIYDASSR_	A0A0C4DH25	-1.2043	1.2043	7.83396e-09	2.37462e-08	176	A0A0C4DH25	IGKV3D-20	Immunoglobulin kappa variable 3D-20	KVD20_HUMAN	1	-56.602	0.43398	Dengue	QC	NaN	NaN	NaN	57.1907	0.180347
Dengue / QC	_TAGWNIPMGLLYNKINHC[Carbamidomethyl (C)]RFDEFFSEGC[Carbamidomethyl (C)]APGSK_	P02787	0.79149	0.79149	7.90949e-09	2.39631e-08	176	P02787	TF	Serotransferrin	TRFE_HUMAN	1	73.0861	1.73086	Dengue	QC	NaN	NaN	NaN	128.006	0.100173
Dengue / QC	_GRTLEIPGNSDPNM[Oxidation (M)]IPDGDFNSYVR_	P0C0L5	1.61741	1.61741	7.95137e-09	2.40779e-08	106	P0C0L5	C4B	Complement C4-B	CO4B_HUMAN	1	206.824	3.06824	Dengue	QC	NaN	NaN	NaN	94.4456	0.286752
Dengue / QC	_TRPHWC[Carbamidomethyl (C)]C[Carbamidomethyl (C)]TR_	Q16610	1.62277	1.62277	7.98031e-09	2.41534e-08	48	Q16610	ECM1	Extracellular matrix protein 1	ECM1_HUMAN	1	207.967	3.07967	Dengue	QC	NaN	NaN	NaN	42.7351	0.23835
Dengue / QC	_LGYVTADGETSGSITC[Carbamidomethyl (C)]GKDGWSAQPTC[Carbamidomethyl (C)]IK_	P08603	2.02347	2.02347	8.09577e-09	2.44537e-08	138	P08603	CFH	Complement factor H	CFAH_HUMAN	1	306.561	4.06561	Dengue	QC	NaN	NaN	NaN	112.981	0.3099
Dengue / QC	_TAMDVFVC[Carbamidomethyl (C)]TYFM[Oxidation (M)]PAAQLPELPDVELPTNKDVC[Carbamidomethyl (C)]DPGNTK_	P02774;P02774-3	1.06464	1.06464	8.24317e-09	2.4874e-08	104	P02774;P02774-3	GC	Vitamin D-binding protein;Isoform 3 of Vitamin D-binding protein	VTDB_HUMAN	1	109.165	2.09165	Dengue	QC	NaN	NaN	NaN	59.4508	0.17938
Dengue / QC	_GVSAYLSRPSPFDLFIR_	A0A286YES5;P01854	3.07379	3.07379	8.24175e-09	2.4874e-08	38	A0A286YES5;P01854	IGHE	Immunoglobulin heavy constant epsilon (Fragment);Immunoglobulin heavy constant epsilon	A0A286YES5_HUMAN;IGHE_HUMAN	1	741.981	8.41981	Dengue	QC	NaN	NaN	NaN	24.0153	0.32942
Dengue / QC	_IMADSGPIYDK_	P07996	0.949213	0.949213	8.24799e-09	2.48761e-08	48	P07996	THBS1	Thrombospondin-1	TSP1_HUMAN	1	93.0819	1.93082	Dengue	QC	NaN	NaN	NaN	25.5287	0.130701
Dengue / QC	_IEGSNKVPVDPATYGQFYGGDSYIILYNYR_	P06396	0.76109	0.76109	8.48467e-09	2.55133e-08	166	P06396	GSN	Gelsolin	GELS_HUMAN	1	69.4771	1.69477	Dengue	QC	NaN	NaN	NaN	77.3789	0.0938609
Dengue / QC	_LLIYYDDLLPSGVSDRFSGSK_	A0A0B4J1U3	1.09268	1.09268	8.48205e-09	2.55133e-08	102	A0A0B4J1U3	IGLV1-36	Immunoglobulin lambda variable 1-36	LV136_HUMAN	1	113.27	2.1327	Dengue	QC	NaN	NaN	NaN	64.4933	0.176514
Dengue / QC	_AGELEVFNGYFVHFFAPDNLDPIPK_	P19823	0.690032	0.690032	8.5552e-09	2.57125e-08	174	P19823	ITIH2	Inter-alpha-trypsin inhibitor heavy chain H2	ITIH2_HUMAN	1	61.332	1.61332	Dengue	QC	NaN	NaN	NaN	104.698	0.0994322
Dengue / QC	_NFDEILR_	P30041	1.68573	1.68573	8.81707e-09	2.64074e-08	18	P30041	PRDX6	Peroxiredoxin-6	PRDX6_HUMAN	1	221.702	3.21702	Dengue	QC	NaN	NaN	NaN	10.6883	0.145403
Dengue / QC	_GMADQDGLKPTIDKPSEDSPPLEM[Oxidation (M)]LGPR_	P19827	1.02029	1.02029	8.85755e-09	2.65154e-08	56	P19827	ITIH1	Inter-alpha-trypsin inhibitor heavy chain H1	ITIH1_HUMAN	1	102.833	2.02833	Dengue	QC	NaN	NaN	NaN	48.7486	0.12665
Dengue / QC	_NSLFEYQK_	P02671	1.68085	1.68085	8.89563e-09	2.66162e-08	114	P02671	FGA	Fibrinogen alpha chain	FIBA_HUMAN	1	220.618	3.20618	Dengue	QC	NaN	NaN	NaN	90.9545	0.224142
Dengue / QC	_LMALREPAAQAPVK_	A0A0A0MS09;P01880;P01880-2	1.32084	1.32084	9.21757e-09	2.75112e-08	38	A0A0A0MS09;P01880;P01880-2	IGHD	Immunoglobulin heavy constant delta (Fragment);Immunoglobulin heavy constant delta;Isoform 2 of Immunoglobulin heavy constant delta	A0A0A0MS09_HUMAN;IGHD_HUMAN;IGHD_HUMAN	1	149.812	2.49812	Dengue	QC	NaN	NaN	NaN	27.3039	0.168838
Dengue / QC	_YVGGQEHFAHLLILR_	P02763	-0.39732	0.39732	9.51906e-09	2.83689e-08	176	P02763	ORM1	Alpha-1-acid glycoprotein 1	A1AG1_HUMAN	1	-24.0733	0.759267	Dengue	QC	NaN	NaN	NaN	116.54	0.0657092
Dengue / QC	_DLFHC[Carbamidomethyl (C)]VSFTLPR_	P20742	3.513	3.513	9.58149e-09	2.85408e-08	34	P20742	PZP	Pregnancy zone protein	PZP_HUMAN	1	1041.61	11.4161	Dengue	QC	NaN	NaN	NaN	26.0856	0.441456
Dengue / QC	_YAATSQVLLPSK_	P01871	-0.555547	0.555547	9.61781e-09	2.86348e-08	170	P01871	IGHM	Immunoglobulin heavy constant mu	IGHM_HUMAN	1	-31.9601	0.680399	Dengue	QC	NaN	NaN	NaN	134.233	0.0878846
Dengue / QC	_SDVVYTDWK_	P02763	-0.499157	0.499157	9.79702e-09	2.90965e-08	176	P02763	ORM1	Alpha-1-acid glycoprotein 1	A1AG1_HUMAN	1	-29.248	0.70752	Dengue	QC	NaN	NaN	NaN	73.32	0.0796845
Dengue / QC	_TNLESILSYPKDFTC[Carbamidomethyl (C)]VHQALKGFTTK_	P05155;P05155-3	0.730199	0.730199	9.88592e-09	2.93172e-08	70	P05155;P05155-3	SERPING1	Plasma protease C1 inhibitor;Isoform 3 of Plasma protease C1 inhibitor	IC1_HUMAN	1	65.8868	1.65887	Dengue	QC	NaN	NaN	NaN	55.1252	0.105426
Dengue / QC	_QVFLYPEK_	P04114	1.14445	1.14445	9.90869e-09	2.93558e-08	40	P04114	APOB	Apolipoprotein B-100	APOB_HUMAN	1	121.062	2.21062	Dengue	QC	NaN	NaN	NaN	33.1748	0.138829
Dengue / QC	_ALLFIPR_	P08238	0.999006	0.999006	9.90432e-09	2.93558e-08	44	P08238	HSP90AB1	Heat shock protein HSP 90-beta	HS90B_HUMAN	1	99.8623	1.99862	Dengue	QC	NaN	NaN	NaN	23.0819	0.313241
Dengue / QC	_GQELC[Carbamidomethyl (C)]ADYSENTFTEYKK_	P02774;P02774-3	0.769001	0.769001	1.00649e-08	2.97895e-08	48	P02774;P02774-3	GC	Vitamin D-binding protein;Isoform 3 of Vitamin D-binding protein	VTDB_HUMAN	1	70.409	1.70409	Dengue	QC	NaN	NaN	NaN	16.5775	0.0687564
Dengue / QC	_VSNKALPAPIEK_	P01857	2.45548	2.45548	1.04128e-08	3.07284e-08	170	P01857	IGHG1	Immunoglobulin heavy constant gamma 1	IGHG1_HUMAN	1	448.497	5.48497	Dengue	QC	NaN	NaN	NaN	141.986	0.378088
Dengue / QC	_DLATVYVDVLKDSGR_	P02647	0.336947	0.336947	1.08012e-08	3.17967e-08	162	P02647	APOA1	Apolipoprotein A-I	APOA1_HUMAN	1	26.3081	1.26308	Dengue	QC	NaN	NaN	NaN	84.3694	0.08629
Dengue / QC	_C[Carbamidomethyl (C)]VLFPYGGC[Carbamidomethyl (C)]QGNGNKFYSEK_	P02760	1.65385	1.65385	1.08124e-08	3.18142e-08	26	P02760	AMBP	Protein AMBP	AMBP_HUMAN	1	214.672	3.14672	Dengue	QC	NaN	NaN	NaN	18.5313	0.154062
Dengue / QC	_KEEYGHNEVVEYDC[Carbamidomethyl (C)]NPNFIINGPK_	Q9BXR6	0.908438	0.908438	1.08887e-08	3.2023e-08	56	Q9BXR6	CFHR5	Complement factor H-related protein 5	FHR5_HUMAN	1	87.7012	1.87701	Dengue	QC	NaN	NaN	NaN	40.0031	0.160695
Dengue / QC	_C[Carbamidomethyl (C)]NPGTGQC[Carbamidomethyl (C)]VC[Carbamidomethyl (C)]PAGWVGEQC[Carbamidomethyl (C)]QHC[Carbamidomethyl (C)]GGR_	O75882;O75882-2	0.798914	0.798914	1.09345e-08	3.21264e-08	136	O75882;O75882-2	ATRN	Attractin;Isoform 2 of Attractin	ATRN_HUMAN	1	73.9791	1.73979	Dengue	QC	NaN	NaN	NaN	59.3142	0.113998
Dengue / QC	_TLRVQGNDHSATR_	Q14624	2.05924	2.05924	1.12994e-08	3.31661e-08	100	Q14624	ITIH4	Inter-alpha-trypsin inhibitor heavy chain H4	ITIH4_HUMAN	1	316.768	4.16768	Dengue	QC	NaN	NaN	NaN	73.2811	0.319453
Dengue / QC	_QSGSEC[Carbamidomethyl (C)]IC[Carbamidomethyl (C)]MSPEEDC[Carbamidomethyl (C)]SHHSEDLC[Carbamidomethyl (C)]VFDTDSNDYFTSPAC[Carbamidomethyl (C)]K_	P13671	0.653291	0.653291	1.20196e-08	3.51431e-08	136	P13671	C6	Complement component C6	CO6_HUMAN	1	57.2752	1.57275	Dengue	QC	NaN	NaN	NaN	86.3152	0.0891084
Dengue / QC	_KLWAYLTINQLLAER_	P19823	0.606278	0.606278	1.23902e-08	3.60867e-08	162	P19823	ITIH2	Inter-alpha-trypsin inhibitor heavy chain H2	ITIH2_HUMAN	1	52.2327	1.52233	Dengue	QC	NaN	NaN	NaN	118.198	0.108808
Dengue / QC	_NPFVFAPTLLTVAVHFEEVAK_	P43652	1.045	1.045	1.25324e-08	3.64481e-08	74	P43652	AFM	Afamin	AFAM_HUMAN	1	106.337	2.06337	Dengue	QC	NaN	NaN	NaN	36.2924	0.144454
Dengue / QC	_SLALGTFAHTPALASLGLSNNR_	P35858;P35858-2	0.634062	0.634062	1.29008e-08	3.74832e-08	138	P35858;P35858-2	IGFALS	Insulin-like growth factor-binding protein complex acid labile subunit;Isoform 2 of Insulin-like growth factor-binding protein complex acid labile subunit	ALS_HUMAN	1	55.1928	1.55193	Dengue	QC	NaN	NaN	NaN	86.7281	0.10471
Dengue / QC	_DVVLTTTFVDDIK_	P02748	0.495812	0.495812	1.29231e-08	3.75299e-08	144	P02748	C9	Complement component C9	CO9_HUMAN	1	41.0114	1.41011	Dengue	QC	NaN	NaN	NaN	104.885	0.0814795
Dengue / QC	_KGGETSEMYLIQPDSSVKPYR_	P02675	2.42234	2.42234	1.31556e-08	3.815e-08	134	P02675	FGB	Fibrinogen beta chain	FIBB_HUMAN	1	436.04	5.3604	Dengue	QC	NaN	NaN	NaN	113.207	0.356708
Dengue / QC	_SSSYSKQFTSSTSYNRGDSTFESK_	P02671	1.32144	1.32144	1.32553e-08	3.84022e-08	114	P02671	FGA	Fibrinogen alpha chain	FIBA_HUMAN	1	149.915	2.49915	Dengue	QC	NaN	NaN	NaN	63.925	0.298216
Dengue / QC	_NPNLPPETVDSLKNILTSNNIDVKK_	P05090	0.516505	0.516505	1.33503e-08	3.86401e-08	124	P05090	APOD	Apolipoprotein D	APOD_HUMAN	1	43.0486	1.43049	Dengue	QC	NaN	NaN	NaN	104.638	0.0847752
Dengue / QC	_NRNVHSGSTFFKYYLQGAK_	Q14624	1.38662	1.38662	1.34232e-08	3.88139e-08	52	Q14624	ITIH4	Inter-alpha-trypsin inhibitor heavy chain H4	ITIH4_HUMAN	1	161.465	2.61465	Dengue	QC	NaN	NaN	NaN	46.1711	0.199799
Dengue / QC	_VGFAEAARL_	A0A1B0GV23;A0A1B0GVD5;A0A1B0GWE8;P07339	0.974459	0.974459	1.35465e-08	3.9133e-08	50	A0A1B0GV23;A0A1B0GVD5;A0A1B0GWE8;P07339	CTSD	Cathepsin D	A0A1B0GV23_HUMAN;A0A1B0GVD5_HUMAN;A0A1B0GWE8_HUMAN;CATD_HUMAN	1	96.4905	1.9649	Dengue	QC	NaN	NaN	NaN	40.0471	0.159662
Dengue / QC	_TTPPVLDSDGSFFLYSKLTVDK_	P01857	0.636334	0.636334	1.36898e-08	3.95279e-08	126	P01857	IGHG1	Immunoglobulin heavy constant gamma 1	IGHG1_HUMAN	1	55.4374	1.55437	Dengue	QC	NaN	NaN	NaN	119.254	0.096448
Dengue / QC	_C[Carbamidomethyl (C)]LLFSFLPASSINDMEKR_	H0YAC1;P03952	0.536573	0.536573	1.37851e-08	3.97841e-08	132	H0YAC1;P03952	KLKB1	Plasma kallikrein (Fragment);Plasma kallikrein	H0YAC1_HUMAN;KLKB1_HUMAN	1	45.0523	1.45052	Dengue	QC	NaN	NaN	NaN	79.0983	0.101164
Dengue / QC	_ITYYHLSFPTNIQAPAVVFR_	P23142-4	0.457757	0.457757	1.38352e-08	3.99095e-08	158	P23142-4	FBLN1	Isoform C of Fibulin-1	FBLN1_HUMAN	1	37.3405	1.3734	Dengue	QC	NaN	NaN	NaN	123.255	0.080003
Dengue / QC	_GSVFLRNPSRNNVPC[Carbamidomethyl (C)]SPK_	P0C0L5	1.04914	1.04914	1.38783e-08	3.99955e-08	116	P0C0L5	C4B	Complement C4-B	CO4B_HUMAN	1	106.929	2.06929	Dengue	QC	NaN	NaN	NaN	85.0291	0.138289
Dengue / QC	_AKVFKDVFLEMNIPYSVVR_	P01031	0.642626	0.642626	1.38896e-08	4.00091e-08	116	P01031	C5	Complement C5	CO5_HUMAN	1	56.1168	1.56117	Dengue	QC	NaN	NaN	NaN	86.2961	0.0926905
Dengue / QC	_QRPPDLDTSSNAVDLLFFTDESGDSR_	B4DPQ0	0.559155	0.559155	1.40642e-08	4.04772e-08	150	B4DPQ0	C1R	Complement C1r subcomponent	B4DPQ0_HUMAN	1	47.3406	1.47341	Dengue	QC	NaN	NaN	NaN	103.407	0.0992125
Dengue / QC	_STDTSC[Carbamidomethyl (C)]VNPPTVQNAHILSR_	Q03591	1.00396	1.00396	1.42e-08	4.08054e-08	100	Q03591	CFHR1	Complement factor H-related protein 1	FHR1_HUMAN	1	100.55	2.0055	Dengue	QC	NaN	NaN	NaN	68.0115	0.141
Dengue / QC	_KGYTQQLAFR_	P01024	-0.49262	0.49262	1.44423e-08	4.14624e-08	174	P01024	C3	Complement C3	CO3_HUMAN	1	-28.9267	0.710733	Dengue	QC	NaN	NaN	NaN	91.8969	0.0817023
Dengue / QC	_PGSAPTTVIYEDNQRPSGVPDR_	P01721	1.04798	1.04798	1.46482e-08	4.19933e-08	50	P01721	IGLV6-57	Immunoglobulin lambda variable 6-57	LV657_HUMAN	1	106.763	2.06763	Dengue	QC	NaN	NaN	NaN	38.2044	0.13293
Dengue / QC	_SITLFVQEDR_	P07996	0.589236	0.589236	1.51217e-08	4.32275e-08	94	P07996	THBS1	Thrombospondin-1	TSP1_HUMAN	1	50.445	1.50445	Dengue	QC	NaN	NaN	NaN	87.8533	0.0890408
Dengue / QC	_VNRNNLELSTPLK_	P07225	0.752985	0.752985	1.52588e-08	4.35987e-08	16	P07225	PROS1	Vitamin K-dependent protein S	PROS_HUMAN	1	68.5276	1.68528	Dengue	QC	NaN	NaN	NaN	10.8339	0.0844056
Dengue / QC	_NNNEKDMALTAFVLISLQEAK_	P01024	0.89749	0.89749	1.54951e-08	4.41482e-08	138	P01024	C3	Complement C3	CO3_HUMAN	1	86.2822	1.86282	Dengue	QC	NaN	NaN	NaN	102.574	0.156888
Dengue / QC	_KFIC[Carbamidomethyl (C)]PLTGLWPINTLKC[Carbamidomethyl (C)]TPR_	P02749	4.95868	4.95868	1.60488e-08	4.5532e-08	30	P02749	APOH	Beta-2-glycoprotein 1	APOH_HUMAN	1	3009.65	31.0965	Dengue	QC	NaN	NaN	NaN	19.2694	0.414119
Dengue / QC	_YTTFEYPNTISFSC[Carbamidomethyl (C)]NTGFYLNGADSAK_	P02749	0.903159	0.903159	1.60959e-08	4.56085e-08	144	P02749	APOH	Beta-2-glycoprotein 1	APOH_HUMAN	1	87.0156	1.87016	Dengue	QC	NaN	NaN	NaN	70.8417	0.128598
Dengue / QC	_ASSIIDELFQDRFFTREPQDTYHYLPFSLPHR_	P10909;P10909-2;P10909-4;P10909-5	0.725086	0.725086	1.6212e-08	4.58655e-08	152	P10909;P10909-2;P10909-4;P10909-5	CLU	Clusterin;Isoform 2 of Clusterin;Isoform 4 of Clusterin;Isoform 5 of Clusterin	CLUS_HUMAN	1	65.2999	1.653	Dengue	QC	NaN	NaN	NaN	106.033	0.112562
Dengue / QC	_TLNQPDSQLQLTTGNGLFLSEGLKLVDKFLEDVK_	P01009	0.798664	0.798664	1.62713e-08	4.60115e-08	78	P01009	SERPINA1	Alpha-1-antitrypsin	A1AT_HUMAN	1	73.949	1.73949	Dengue	QC	NaN	NaN	NaN	29.5831	0.111566
Dengue / QC	_TLADLTLLDSPIKVPLLLSEPINIIDALEM[Oxidation (M)]R_	P04114	0.871269	0.871269	1.65368e-08	4.67405e-08	116	P04114	APOB	Apolipoprotein B-100	APOB_HUMAN	1	82.9271	1.82927	Dengue	QC	NaN	NaN	NaN	22.6277	0.1178
Dengue / QC	_LVLLNAIYLSAK_	P05155;P05155-3	1.15933	1.15933	1.6606e-08	4.68921e-08	36	P05155;P05155-3	SERPING1	Plasma protease C1 inhibitor;Isoform 3 of Plasma protease C1 inhibitor	IC1_HUMAN	1	123.354	2.23354	Dengue	QC	NaN	NaN	NaN	13.7769	0.100213
Dengue / QC	_FFTREPQDTYHYLPFSLPHR_	P10909;P10909-2;P10909-4;P10909-5	0.507798	0.507798	1.68844e-08	4.76115e-08	102	P10909;P10909-2;P10909-4;P10909-5	CLU	Clusterin;Isoform 2 of Clusterin;Isoform 4 of Clusterin;Isoform 5 of Clusterin	CLUS_HUMAN	1	42.1878	1.42188	Dengue	QC	NaN	NaN	NaN	92.5155	0.0850322
Dengue / QC	_C[Carbamidomethyl (C)]C[Carbamidomethyl (C)]EDGMR_	P01024	0.777638	0.777638	1.69786e-08	4.78546e-08	158	P01024	C3	Complement C3	CO3_HUMAN	1	71.4322	1.71432	Dengue	QC	NaN	NaN	NaN	59.9883	0.106788
Dengue / QC	_EDFTSLSLVLYSR_	P02774;P02774-3	0.571402	0.571402	1.72657e-08	4.85729e-08	136	P02774;P02774-3	GC	Vitamin D-binding protein;Isoform 3 of Vitamin D-binding protein	VTDB_HUMAN	1	48.5967	1.48597	Dengue	QC	NaN	NaN	NaN	90.4984	0.10129
Dengue / QC	_LDVDQALNR_	I3L145;P04278	1.09961	1.09961	1.73593e-08	4.87906e-08	46	I3L145;P04278	SHBG	Sex hormone-binding globulin	I3L145_HUMAN;SHBG_HUMAN	1	114.296	2.14296	Dengue	QC	NaN	NaN	NaN	33.0513	0.256972
Dengue / QC	_TEDTALYYC[Carbamidomethyl (C)]AK_	A0A0B4J1X8	-0.504029	0.504029	1.75029e-08	4.91483e-08	174	A0A0B4J1X8	IGHV3-43	Immunoglobulin heavy variable 3-43	HV343_HUMAN	1	-29.4865	0.705135	Dengue	QC	NaN	NaN	NaN	90.2491	0.0923352
Dengue / QC	_YVTSAPMPEPQAPGR_	P01871	-0.649048	0.649048	1.75797e-08	4.9318e-08	176	P01871	IGHM	Immunoglobulin heavy constant mu	IGHM_HUMAN	1	-36.2299	0.637701	Dengue	QC	NaN	NaN	NaN	62.3921	0.0979207
Dengue / QC	_HYYESEVLAMNFQDWATASR_	P08185	0.726624	0.726624	1.76823e-08	4.95828e-08	50	P08185	SERPINA6	Corticosteroid-binding globulin	CBG_HUMAN	1	65.4762	1.65476	Dengue	QC	NaN	NaN	NaN	32.6491	0.115793
Dengue / QC	_TQVNTQAEQLR_	P06727	1.17044	1.17044	1.77285e-08	4.96537e-08	68	P06727	APOA4	Apolipoprotein A-IV	APOA4_HUMAN	1	125.081	2.25081	Dengue	QC	NaN	NaN	NaN	41.873	0.198996
Dengue / QC	_DKVQYEC[Carbamidomethyl (C)]ATGYYTAGGKK_	P05160	1.50786	1.50786	1.77323e-08	4.96537e-08	44	P05160	F13B	Coagulation factor XIII B chain	F13B_HUMAN	1	184.387	2.84387	Dengue	QC	NaN	NaN	NaN	13.1058	0.157697
Dengue / QC	_LQDAEIAR_	P06703;R4GN98	0.964762	0.964762	1.82654e-08	5.10043e-08	40	P06703;R4GN98	S100A6	Protein S100-A6;Protein S100 (Fragment)	S10A6_HUMAN;R4GN98_HUMAN	1	95.1742	1.95174	Dengue	QC	NaN	NaN	NaN	31.7128	0.118416
Dengue / QC	_EEIIYEC[Carbamidomethyl (C)]DKGYILVGQAK_	P04003	1.37169	1.37169	1.83477e-08	5.11937e-08	40	P04003	C4BPA	C4b-binding protein alpha chain	C4BPA_HUMAN	1	158.774	2.58774	Dengue	QC	NaN	NaN	NaN	23.6772	0.140992
Dengue / QC	_MEPFHFKNSVIKVPMMNSK_	P05155;P05155-3	0.894743	0.894743	1.9094e-08	5.31212e-08	132	P05155;P05155-3	SERPING1	Plasma protease C1 inhibitor;Isoform 3 of Plasma protease C1 inhibitor	IC1_HUMAN	1	85.9279	1.85928	Dengue	QC	NaN	NaN	NaN	92.065	0.199439
Dengue / QC	_DSPSVWAAVPGK_	P07737	1.10806	1.10806	1.92844e-08	5.35274e-08	44	P07737	PFN1	Profilin-1	PROF1_HUMAN	1	115.556	2.15556	Dengue	QC	NaN	NaN	NaN	29.6526	0.152201
Dengue / QC	_SLGPNSC[Carbamidomethyl (C)]SANGPGLYLIHGPNLYC[Carbamidomethyl (C)]YSDVEK_	P02790	0.537055	0.537055	1.97876e-08	5.47978e-08	176	P02790	HPX	Hemopexin	HEMO_HUMAN	1	45.1008	1.45101	Dengue	QC	NaN	NaN	NaN	95.2369	0.0713978
Dengue / QC	_AAEAAAAPAESAAPAAGEEPSKEEGEPK_	P80723	7.16013	7.16013	1.97832e-08	5.47978e-08	32	P80723	BASP1	Brain acid soluble protein 1	BASP1_HUMAN	1	14202.6	143.026	Dengue	QC	NaN	NaN	NaN	19.4755	0.39833
Dengue / QC	_SNRVTVFPIGIGDRYDAAQLR_	P04275	1.03807	1.03807	1.99725e-08	5.5259e-08	98	P04275	VWF	von Willebrand factor	VWF_HUMAN	1	105.348	2.05348	Dengue	QC	NaN	NaN	NaN	73.7598	0.200786
Dengue / QC	_GQLKYPR_	P05160	0.666994	0.666994	2.03949e-08	5.63759e-08	108	P05160	F13B	Coagulation factor XIII B chain	F13B_HUMAN	1	58.7762	1.58776	Dengue	QC	NaN	NaN	NaN	45.1564	0.109971
Dengue / QC	_AVLQLNEEGVDTAGSTGVTLNLTSKPIILR_	P08185	1.15597	1.15597	2.04449e-08	5.64883e-08	54	P08185	SERPINA6	Corticosteroid-binding globulin	CBG_HUMAN	1	122.834	2.22834	Dengue	QC	NaN	NaN	NaN	44.84	0.161288
Dengue / QC	_FKTGTTLKYTC[Carbamidomethyl (C)]LPGYVR_	P04003	1.10833	1.10833	2.08114e-08	5.74482e-08	140	P04003	C4BPA	C4b-binding protein alpha chain	C4BPA_HUMAN	1	115.596	2.15596	Dengue	QC	NaN	NaN	NaN	119.42	0.180611
Dengue / QC	_NTLYLQM[Oxidation (M)]NSLR_	A0A0J9YVT0;P0DP02	-0.632785	0.632785	2.08687e-08	5.75537e-08	162	A0A0J9YVT0;P0DP02	IGHV3-33;IGHV3-30-3	Immunoglobulin heavy variable 3-33 (Fragment);Immunoglobulin heavy variable 3-30-3	A0A0J9YVT0_HUMAN;HVC33_HUMAN	1	-35.507	0.64493	Dengue	QC	NaN	NaN	NaN	60.2448	0.102422
Dengue / QC	_SC[Carbamidomethyl (C)]DSLNNR_	P07996	1.22522	1.22522	2.12102e-08	5.83354e-08	46	P07996	THBS1	Thrombospondin-1	TSP1_HUMAN	1	133.791	2.33791	Dengue	QC	NaN	NaN	NaN	16.2333	0.14563
Dengue / QC	_NSLFFSAQPFEITASTNNEGNLK_	P04114	0.55088	0.55088	2.12251e-08	5.83496e-08	96	P04114	APOB	Apolipoprotein B-100	APOB_HUMAN	1	46.4979	1.46498	Dengue	QC	NaN	NaN	NaN	58.8658	0.110074
Dengue / QC	_ELSYYSLEDLNNK_	P01031	0.294599	0.294599	2.13142e-08	5.85678e-08	110	P01031	C5	Complement C5	CO5_HUMAN	1	22.6544	1.22654	Dengue	QC	NaN	NaN	NaN	96.525	0.0815933
Dengue / QC	_DTEEEDFHVDQVTTVKVPMMKR_	P01009	1.87912	1.87912	2.14138e-08	5.88148e-08	34	P01009	SERPINA1	Alpha-1-antitrypsin	A1AT_HUMAN	1	267.852	3.67852	Dengue	QC	NaN	NaN	NaN	24.6287	0.316809
Dengue / QC	_APDAGGC[Carbamidomethyl (C)]LHADPDLGVLC[Carbamidomethyl (C)]PTGC[Carbamidomethyl (C)]QLQEALLQQERPIR_	P02675	1.89266	1.89266	2.16942e-08	5.95035e-08	34	P02675	FGB	Fibrinogen beta chain	FIBB_HUMAN	1	271.32	3.7132	Dengue	QC	NaN	NaN	NaN	27.6358	0.255995
Dengue / QC	_YSQKFQGR_	A0A0C4DH29	1.76407	1.76407	2.17567e-08	5.96478e-08	46	A0A0C4DH29	IGHV1-3	Immunoglobulin heavy variable 1-3	HV103_HUMAN	1	239.655	3.39655	Dengue	QC	NaN	NaN	NaN	40.2489	0.211446
Dengue / QC	_VTASSPVAVLSGHSC[Carbamidomethyl (C)]AQK_	Q9Y6R7	1.28462	1.28462	2.20423e-08	6.03483e-08	66	Q9Y6R7	FCGBP	IgGFc-binding protein	FCGBP_HUMAN	1	143.619	2.43619	Dengue	QC	NaN	NaN	NaN	52.5016	0.226822
Dengue / QC	_C[Carbamidomethyl (C)]C[Carbamidomethyl (C)]VEC[Carbamidomethyl (C)]PPC[Carbamidomethyl (C)]PAPPVAGPSVFLFPPKPKDTLMISR_	P01859	1.93437	1.93437	2.20703e-08	6.03977e-08	46	P01859	IGHG2	Immunoglobulin heavy constant gamma 2	IGHG2_HUMAN	1	282.212	3.82212	Dengue	QC	NaN	NaN	NaN	39.651	0.253241
Dengue / QC	_EPC[Carbamidomethyl (C)]VESLVSQYFQTVTDYGK_	P02652;V9GYM3	0.621157	0.621157	2.23912e-08	6.11957e-08	158	P02652;V9GYM3	APOA2	Apolipoprotein A-II	APOA2_HUMAN;V9GYM3_HUMAN	1	53.8108	1.53811	Dengue	QC	NaN	NaN	NaN	118.995	0.083835
Dengue / QC	_TAFISDFAVTADGNAFIGDIKDK_	P19827	0.957818	0.957818	2.24658e-08	6.13591e-08	36	P19827	ITIH1	Inter-alpha-trypsin inhibitor heavy chain H1	ITIH1_HUMAN	1	94.237	1.94237	Dengue	QC	NaN	NaN	NaN	30.623	0.131674
Dengue / QC	_ETEGLRQEMSKDLEEVK_	P02647	0.612753	0.612753	2.30365e-08	6.28135e-08	90	P02647	APOA1	Apolipoprotein A-I	APOA1_HUMAN	1	52.9175	1.52917	Dengue	QC	NaN	NaN	NaN	73.7036	0.0977359
Dengue / QC	_LGDDLLQC[Carbamidomethyl (C)]HPAVK_	E7END6;P04070;P04070-2	0.470284	0.470284	2.41485e-08	6.56675e-08	38	E7END6;P04070;P04070-2	PROC	Vitamin K-dependent protein C;Vitamin K-dependent protein C;Isoform 2 of Vitamin K-dependent protein C	E7END6_HUMAN;PROC_HUMAN;PROC_HUMAN	1	38.5383	1.38538	Dengue	QC	NaN	NaN	NaN	26.8414	0.0688397
Dengue / QC	_AQVSPTASDMLHMR_	Q6UXB8	0.790395	0.790395	2.48762e-08	6.75851e-08	52	Q6UXB8	PI16	Peptidase inhibitor 16	PI16_HUMAN	1	72.9548	1.72955	Dengue	QC	NaN	NaN	NaN	44.185	0.129649
Dengue / QC	_DGFDISGNPWIC[Carbamidomethyl (C)]DQNLSDLYR_	P02750	0.492532	0.492532	2.53825e-08	6.88367e-08	134	P02750	LRG1	Leucine-rich alpha-2-glycoprotein	A2GL_HUMAN	1	40.6912	1.40691	Dengue	QC	NaN	NaN	NaN	94.7898	0.111811
Dengue / QC	_SDVMYTDWK_	P19652	-0.396839	0.396839	2.75994e-08	7.45803e-08	176	P19652	ORM2	Alpha-1-acid glycoprotein 2	A1AG2_HUMAN	1	-24.0479	0.759521	Dengue	QC	NaN	NaN	NaN	85.2346	0.0622472
Dengue / QC	_LASVSVSR_	Q9Y6R7	1.69145	1.69145	2.78696e-08	7.52766e-08	36	Q9Y6R7	FCGBP	IgGFc-binding protein	FCGBP_HUMAN	1	222.982	3.22982	Dengue	QC	NaN	NaN	NaN	25.0154	0.228478
Dengue / QC	_RVEPYGENFNK_	P06727	1.22361	1.22361	2.81892e-08	7.60377e-08	36	P06727	APOA4	Apolipoprotein A-IV	APOA4_HUMAN	1	133.531	2.33531	Dengue	QC	NaN	NaN	NaN	30.3452	0.219932
Dengue / QC	_EPQVYTLPPSQEEMTKNQVSLTC[Carbamidomethyl (C)]LVK_	P01861	0.868812	0.868812	2.85026e-08	7.678e-08	150	P01861	IGHG4	Immunoglobulin heavy constant gamma 4	IGHG4_HUMAN	1	82.6159	1.82616	Dengue	QC	NaN	NaN	NaN	124.215	0.118726
Dengue / QC	_DQYKVGEVLK_	P08603	0.657588	0.657588	2.90057e-08	7.79262e-08	136	P08603	CFH	Complement factor H	CFAH_HUMAN	1	57.7443	1.57744	Dengue	QC	NaN	NaN	NaN	99.0269	0.100579
Dengue / QC	_GVAGGSVAVLC[Carbamidomethyl (C)]PYNR_	P01833	1.57762	1.57762	2.97365e-08	7.97474e-08	96	P01833	PIGR	Polymeric immunoglobulin receptor	PIGR_HUMAN	1	198.478	2.98478	Dengue	QC	NaN	NaN	NaN	71.6359	0.25073
Dengue / QC	_FLFDTKEEILMHLWR_	Q96KN2	1.43523	1.43523	3.0046e-08	8.04342e-08	44	Q96KN2	CNDP1	Beta-Ala-His dipeptidase	CNDP1_HUMAN	1	170.426	2.70426	Dengue	QC	NaN	NaN	NaN	33.5532	0.197545
Dengue / QC	_ETEYGPC[Carbamidomethyl (C)]RR_	A6XND0;P17936;P17936-2	2.07102	2.07102	3.109e-08	8.29708e-08	20	A6XND0;P17936;P17936-2	IGFBP3	Insulin-like growth factor-binding protein 3;Insulin-like growth factor-binding protein 3;Isoform 2 of Insulin-like growth factor-binding protein 3	A6XND0_HUMAN;IBP3_HUMAN;IBP3_HUMAN	1	320.184	4.20184	Dengue	QC	NaN	NaN	NaN	14.2711	0.191279
Dengue / QC	_VYTLNNEK_	H0Y300	1.4918	1.4918	3.11744e-08	8.31595e-08	26	H0Y300	HP	Haptoglobin	H0Y300_HUMAN	1	181.241	2.81241	Dengue	QC	NaN	NaN	NaN	21.0888	0.175579
Dengue / QC	_EIVM[Oxidation (M)]TQSPPTLSLSPGER_	A0A075B6H7	0.415142	0.415142	3.15423e-08	8.40662e-08	120	A0A075B6H7	IGKV3-7	Immunoglobulin kappa variable 3-7 (non-functional) (Fragment)	A0A075B6H7_HUMAN	1	33.343	1.33343	Dengue	QC	NaN	NaN	NaN	55.3603	0.305094
Dengue / QC	_ATAVVDGAFK_	P32119	0.875204	0.875204	3.16054e-08	8.41974e-08	60	P32119	PRDX2	Peroxiredoxin-2	PRDX2_HUMAN	1	83.4267	1.83427	Dengue	QC	NaN	NaN	NaN	27.6335	0.157126
Dengue / QC	_QAKEPC[Carbamidomethyl (C)]VESLVSQYFQTVTDYGK_	P02652;V9GYM3	0.852072	0.852072	3.1954e-08	8.50018e-08	48	P02652;V9GYM3	APOA2	Apolipoprotein A-II	APOA2_HUMAN;V9GYM3_HUMAN	1	80.5092	1.80509	Dengue	QC	NaN	NaN	NaN	21.7208	0.291918
Dengue / QC	_QNC[Carbamidomethyl (C)]ELFEQLGEYKFQNALLVRYTK_	P02768	2.67149	2.67149	3.23945e-08	8.60331e-08	32	P02768	ALB	Serum albumin	ALBU_HUMAN	1	537.085	6.37085	Dengue	QC	NaN	NaN	NaN	23.5072	0.242207
Dengue / QC	_RLPFIC[Carbamidomethyl (C)]SY_	P13727	3.10948	3.10948	3.2417e-08	8.6055e-08	28	P13727	PRG2	Bone marrow proteoglycan	PRG2_HUMAN	1	763.071	8.63071	Dengue	QC	NaN	NaN	NaN	15.7506	0.330386
Dengue / QC	_C[Carbamidomethyl (C)]DVDIRKDLYANTVLSGGTTMYPGIADR_	P60709	4.28911	4.28911	3.26024e-08	8.6471e-08	22	P60709	ACTB	Actin, cytoplasmic 1	ACTB_HUMAN	1	1855.02	19.5502	Dengue	QC	NaN	NaN	NaN	13.8975	0.335408
Dengue / QC	_TFPGFFSPM[Oxidation (M)]LGEFVSETESR_	P02671	2.369	2.369	3.28884e-08	8.71527e-08	166	P02671	FGA	Fibrinogen alpha chain	FIBA_HUMAN	1	416.584	5.16584	Dengue	QC	NaN	NaN	NaN	89.6597	0.365564
Dengue / QC	_TNLESILSYPK_	P05155;P05155-3	0.587489	0.587489	3.32256e-08	8.79303e-08	34	P05155;P05155-3	SERPING1	Plasma protease C1 inhibitor;Isoform 3 of Plasma protease C1 inhibitor	IC1_HUMAN	1	50.2629	1.50263	Dengue	QC	NaN	NaN	NaN	19.0579	0.0840926
Dengue / QC	_GDKVWVYPPEK_	P02790	0.588247	0.588247	3.47397e-08	9.17762e-08	136	P02790	HPX	Hemopexin	HEMO_HUMAN	1	50.3418	1.50342	Dengue	QC	NaN	NaN	NaN	89.1056	0.0911581
Dengue / QC	_VFEAMNSYDLGC[Carbamidomethyl (C)]GPGGGDSALQVFQAAGLAFSDGDQWTLSR_	P0C0L5	1.0885	1.0885	3.49034e-08	9.21279e-08	128	P0C0L5	C4B	Complement C4-B	CO4B_HUMAN	1	112.653	2.12653	Dengue	QC	NaN	NaN	NaN	17.489	0.123373
Dengue / QC	_LKHELTDEELQSLFTNFANVVDK_	P43652	0.833692	0.833692	3.48914e-08	9.21279e-08	106	P43652	AFM	Afamin	AFAM_HUMAN	1	78.2241	1.78224	Dengue	QC	NaN	NaN	NaN	83.4618	0.149924
Dengue / QC	_C[Carbamidomethyl (C)]NM[Oxidation (M)]GYEYSER_	P08603	0.695174	0.695174	3.58171e-08	9.44568e-08	70	P08603	CFH	Complement factor H	CFAH_HUMAN	1	61.9079	1.61908	Dengue	QC	NaN	NaN	NaN	56.3048	0.170274
Dengue / QC	_GETFSC[Carbamidomethyl (C)]MVGHEALPLAFTQK_	A0A286YEY5;P01877	-0.0644982	0.0644982	3.66006e-08	9.63543e-08	148	A0A286YEY5;P01877	IGHA2	Immunoglobulin heavy constant alpha 2 (Fragment);Immunoglobulin heavy constant alpha 2	A0A286YEY5_HUMAN;IGHA2_HUMAN	1	-4.37221	0.956278	Dengue	QC	NaN	NaN	NaN	97.1133	0.216764
Dengue / QC	_ASQHGSDVVIETDFGLR_	Q9Y6R7	1.54677	1.54677	3.6921e-08	9.7113e-08	84	Q9Y6R7	FCGBP	IgGFc-binding protein	FCGBP_HUMAN	1	192.162	2.92162	Dengue	QC	NaN	NaN	NaN	65.0124	0.244144
Dengue / QC	_VSWIRQPPGKALEWLAR_	A0A0C4DH43	1.08044	1.08044	3.72115e-08	9.77916e-08	58	A0A0C4DH43	IGHV2-70D	Immunoglobulin heavy variable 2-70D	HV70D_HUMAN	1	111.468	2.11468	Dengue	QC	NaN	NaN	NaN	18.2534	0.143825
Dengue / QC	_EIPDEISILLLGVAHFK_	P36955	0.839791	0.839791	3.73174e-08	9.80273e-08	136	P36955	SERPINF1	Pigment epithelium-derived factor	PEDF_HUMAN	1	78.979	1.78979	Dengue	QC	NaN	NaN	NaN	96.6784	0.108227
Dengue / QC	_GRYEFHSLNIHSC[Carbamidomethyl (C)]ELLHSALRPVPGQGLSLSISDSSIR_	P18428	0.999096	0.999096	3.75978e-08	9.86779e-08	44	P18428	LBP	Lipopolysaccharide-binding protein	LBP_HUMAN	1	99.8748	1.99875	Dengue	QC	NaN	NaN	NaN	32.0935	0.181134
Dengue / QC	_LTLQGIISWGSGC[Carbamidomethyl (C)]GDR_	P00748	0.976347	0.976347	3.76851e-08	9.88209e-08	66	P00748	F12	Coagulation factor XII	FA12_HUMAN	1	96.7477	1.96748	Dengue	QC	NaN	NaN	NaN	36.9257	0.145538
Dengue / QC	_ALGISPFHEHAEVVFTANDSGPR_	P02766	0.365352	0.365352	3.83104e-08	1.0033e-07	176	P02766	TTR	Transthyretin	TTHY_HUMAN	1	28.8196	1.2882	Dengue	QC	NaN	NaN	NaN	118.599	0.0632833
Dengue / QC	_LTSLSDRYVSHFETEGPHVLLYFDSVPTSR_	P0C0L5	0.47022	0.47022	3.8578e-08	1.00943e-07	158	P0C0L5	C4B	Complement C4-B	CO4B_HUMAN	1	38.5321	1.38532	Dengue	QC	NaN	NaN	NaN	114.328	0.101698
Dengue / QC	_LFDSDPITVTVPVEVSRK_	P10909;P10909-2;P10909-4;P10909-5	0.369289	0.369289	3.89248e-08	1.01718e-07	118	P10909;P10909-2;P10909-4;P10909-5	CLU	Clusterin;Isoform 2 of Clusterin;Isoform 4 of Clusterin;Isoform 5 of Clusterin	CLUS_HUMAN	1	29.1716	1.29172	Dengue	QC	NaN	NaN	NaN	88.3285	0.0687854
Dengue / QC	_LYGPDVGQPR_	Q9Y251;Q9Y251-2;Q9Y251-3;Q9Y251-4	1.41368	1.41368	3.94329e-08	1.03001e-07	26	Q9Y251;Q9Y251-2;Q9Y251-3;Q9Y251-4	HPSE	Heparanase;Isoform 2 of Heparanase;Isoform 3 of Heparanase;Isoform 4 of Heparanase	HPSE_HUMAN	1	166.417	2.66417	Dengue	QC	NaN	NaN	NaN	18.6411	0.151256
Dengue / QC	_GLLSGWAR_	P22891;P22891-2	0.509937	0.509937	3.95061e-08	1.03147e-07	162	P22891;P22891-2	PROZ	Vitamin K-dependent protein Z;Isoform 2 of Vitamin K-dependent protein Z	PROZ_HUMAN	1	42.3988	1.42399	Dengue	QC	NaN	NaN	NaN	67.7598	0.106474
Dengue / QC	_GYTQQLAFR_	P01024	-0.438752	0.438752	4.00428e-08	1.04413e-07	176	P01024	C3	Complement C3	CO3_HUMAN	1	-26.2228	0.737772	Dengue	QC	NaN	NaN	NaN	101.339	0.0731513
Dengue / QC	_HNEVWHLVGITSWGEGC[Carbamidomethyl (C)]AQR_	P03951	1.56341	1.56341	4.08382e-08	1.06349e-07	24	P03951	F11	Coagulation factor XI	FA11_HUMAN	1	195.552	2.95552	Dengue	QC	NaN	NaN	NaN	14.7804	0.219527
Dengue / QC	_AHYGGFTVQNEANKYQISVNK_	P02675	2.45784	2.45784	4.09757e-08	1.06661e-07	134	P02675	FGB	Fibrinogen beta chain	FIBB_HUMAN	1	449.392	5.49392	Dengue	QC	NaN	NaN	NaN	112.71	0.353266
Dengue / QC	_LEAGINQLSFPLSSEPIQGSYR_	P20742	2.69675	2.69675	4.14157e-08	1.07713e-07	78	P20742	PZP	Pregnancy zone protein	PZP_HUMAN	1	548.338	6.48338	Dengue	QC	NaN	NaN	NaN	50.3558	0.389615
Dengue / QC	_LATALQKLEEAEKAADESER_	P67936	0.837766	0.837766	4.16141e-08	1.08089e-07	40	P67936	TPM4	Tropomyosin alpha-4 chain	TPM4_HUMAN	1	78.7281	1.78728	Dengue	QC	NaN	NaN	NaN	35.8322	0.135736
Dengue / QC	_EFQLFSSPHGK_	P02787	-0.391641	0.391641	4.25949e-08	1.10446e-07	176	P02787	TF	Serotransferrin	TRFE_HUMAN	1	-23.7738	0.762262	Dengue	QC	NaN	NaN	NaN	102.495	0.066515
Dengue / QC	_HYYIAAEEIIWNYAPSGIDIFTK_	P00450	1.13764	1.13764	4.27078e-08	1.10644e-07	60	P00450	CP	Ceruloplasmin	CERU_HUMAN	1	120.021	2.20021	Dengue	QC	NaN	NaN	NaN	42.0937	0.170474
Dengue / QC	_ETTDTEQTPGQEVVLSPGSFMSITFR_	P48740	0.535278	0.535278	4.27957e-08	1.10824e-07	104	P48740	MASP1	Mannan-binding lectin serine protease 1	MASP1_HUMAN	1	44.9221	1.44922	Dengue	QC	NaN	NaN	NaN	50.7366	0.111993
Dengue / QC	_GPLLVQDVVFTDEMAHFDRER_	P04040	2.46472	2.46472	4.53116e-08	1.16887e-07	18	P04040	CAT	Catalase	CATA_HUMAN	1	452.021	5.52021	Dengue	QC	NaN	NaN	NaN	10.6339	0.217544
Dengue / QC	_QPYSYDFPEDVAPALGTSFSHMLGATNPTQK_	B4E1Z4	1.15737	1.15737	4.5479e-08	1.17268e-07	72	B4E1Z4	NaN	cDNA FLJ55673, highly similar to Complement factor B (EC 3.4.21.47)	B4E1Z4_HUMAN	1	123.05	2.2305	Dengue	QC	NaN	NaN	NaN	30.1233	0.12435
Dengue / QC	_DNSKNTLYLQMNSLR_	A0A0J9YVT0;P0DP02	-0.586408	0.586408	4.60464e-08	1.18681e-07	176	A0A0J9YVT0;P0DP02	IGHV3-33;IGHV3-30-3	Immunoglobulin heavy variable 3-33 (Fragment);Immunoglobulin heavy variable 3-30-3	A0A0J9YVT0_HUMAN;HVC33_HUMAN	1	-33.4001	0.665999	Dengue	QC	NaN	NaN	NaN	82.5783	0.0867889
Dengue / QC	_EC[Carbamidomethyl (C)]EEIIR_	P02675	2.40266	2.40266	4.60714e-08	1.18694e-07	112	P02675	FGB	Fibrinogen beta chain	FIBB_HUMAN	1	428.778	5.28778	Dengue	QC	NaN	NaN	NaN	95.126	0.375055
Dengue / QC	_SEDC[Carbamidomethyl (C)]FILDHGK_	P06396	0.505917	0.505917	4.65821e-08	1.19856e-07	96	P06396	GSN	Gelsolin	GELS_HUMAN	1	42.0025	1.42003	Dengue	QC	NaN	NaN	NaN	35.4508	0.0835404
Dengue / QC	_KVETNM[Oxidation (M)]AFSPFSIASLLTQVLLGAGENTK_	P05155;P05155-3	0.343058	0.343058	4.68521e-08	1.205e-07	58	P05155;P05155-3	SERPING1	Plasma protease C1 inhibitor;Isoform 3 of Plasma protease C1 inhibitor	IC1_HUMAN	1	26.8443	1.26844	Dengue	QC	NaN	NaN	NaN	7.25466	0.237992
Dengue / QC	_PIC[Carbamidomethyl (C)]LPC[Carbamidomethyl (C)]TMEANLALR_	B4E1Z4	0.716465	0.716465	4.80784e-08	1.23496e-07	100	B4E1Z4	NaN	cDNA FLJ55673, highly similar to Complement factor B (EC 3.4.21.47)	B4E1Z4_HUMAN	1	64.315	1.64315	Dengue	QC	NaN	NaN	NaN	73.7586	0.125941
Dengue / QC	_SKMLTPEHVFIHPGWK_	P09871	2.81325	2.81325	4.81339e-08	1.23585e-07	32	P09871	C1S	Complement C1s subcomponent	C1S_HUMAN	1	602.864	7.02864	Dengue	QC	NaN	NaN	NaN	22.646	0.316393
Dengue / QC	_SIAQYWLGC[Carbamidomethyl (C)]PAPGHL_	P04004	0.583725	0.583725	4.85045e-08	1.24484e-07	176	P04004	VTN	Vitronectin	VTNC_HUMAN	1	49.8714	1.49871	Dengue	QC	NaN	NaN	NaN	105.327	0.0936
Dengue / QC	_AQTTVTC[Carbamidomethyl (C)]MENGWSPTPR_	P08603	0.351652	0.351652	4.86461e-08	1.24741e-07	176	P08603	CFH	Complement factor H	CFAH_HUMAN	1	27.6021	1.27602	Dengue	QC	NaN	NaN	NaN	121.552	0.0551104
Dengue / QC	_VVQGKEPAHLMSLFGGKPMIIYK_	P06396	0.3098	0.3098	4.87449e-08	1.24888e-07	134	P06396	GSN	Gelsolin	GELS_HUMAN	1	23.9536	1.23954	Dengue	QC	NaN	NaN	NaN	103.135	0.0777686
Dengue / QC	_GFPIKEDFLEQSEQLFGAKPVSLTGK_	P08697	0.445614	0.445614	4.88873e-08	1.252e-07	126	P08697	SERPINF2	Alpha-2-antiplasmin	A2AP_HUMAN	1	36.1893	1.36189	Dengue	QC	NaN	NaN	NaN	95.8063	0.0873301
Dengue / QC	_VTSTLTIK_	P01871	-0.52605	0.52605	4.91389e-08	1.25764e-07	174	P01871	IGHM	Immunoglobulin heavy constant mu	IGHM_HUMAN	1	-30.5546	0.694454	Dengue	QC	NaN	NaN	NaN	75.0321	0.0901814
Dengue / QC	_RNPFVFAPTLLTVAVHFEEVAK_	P43652	0.980429	0.980429	4.95386e-08	1.26706e-07	124	P43652	AFM	Afamin	AFAM_HUMAN	1	97.3052	1.97305	Dengue	QC	NaN	NaN	NaN	65.2704	0.151242
Dengue / QC	_VSVSQTSK_	P00740	0.870623	0.870623	4.97561e-08	1.27154e-07	92	P00740	F9	Coagulation factor IX	FA9_HUMAN	1	82.8452	1.82845	Dengue	QC	NaN	NaN	NaN	32.6785	0.117756
Dengue / QC	_VYC[Carbamidomethyl (C)]DM[Oxidation (M)]NTENGGWTVIQNR_	P02675	2.71229	2.71229	5.03805e-08	1.28503e-07	32	P02675	FGB	Fibrinogen beta chain	FIBB_HUMAN	1	555.361	6.55361	Dengue	QC	NaN	NaN	NaN	8.63735	0.155422
Dengue / QC	_GEAFTLKATVLNYLPKC[Carbamidomethyl (C)]IR_	P01023	0.792725	0.792725	5.07415e-08	1.29234e-07	106	P01023	A2M	Alpha-2-macroglobulin	A2MG_HUMAN	1	73.2343	1.73234	Dengue	QC	NaN	NaN	NaN	95.2025	0.143789
Dengue / QC	_FTIYNNMFC[Carbamidomethyl (C)]AGFHEGGR_	P00740	0.603102	0.603102	5.16195e-08	1.31415e-07	90	P00740	F9	Coagulation factor IX	FA9_HUMAN	1	51.8979	1.51898	Dengue	QC	NaN	NaN	NaN	72.1229	0.0858199
Dengue / QC	_FPKAEFAEVSKLVTDLTK_	P02768	1.15602	1.15602	5.16905e-08	1.3154e-07	168	P02768	ALB	Serum albumin	ALBU_HUMAN	1	122.841	2.22841	Dengue	QC	NaN	NaN	NaN	155.634	0.177995
Dengue / QC	_RNPADPQRIPSNPSHR_	Q12805;Q12805-2;Q12805-4	2.27751	2.27751	5.18504e-08	1.3184e-07	34	Q12805;Q12805-2;Q12805-4	EFEMP1	EGF-containing fibulin-like extracellular matrix protein 1;Isoform 2 of EGF-containing fibulin-like extracellular matrix protein 1;Isoform 4 of EGF-containing fibulin-like extracellular matrix protein 1	FBLN3_HUMAN	1	384.84	4.8484	Dengue	QC	NaN	NaN	NaN	26.1916	0.293717
Dengue / QC	_STGSWSTLKTQDQK_	B4E1Z4	1.87384	1.87384	5.21214e-08	1.32301e-07	150	B4E1Z4	NaN	cDNA FLJ55673, highly similar to Complement factor B (EC 3.4.21.47)	B4E1Z4_HUMAN	1	266.506	3.66506	Dengue	QC	NaN	NaN	NaN	116.67	0.301585
Dengue / QC	_VEPYGENFNK_	P06727	1.08023	1.08023	5.38161e-08	1.35973e-07	30	P06727	APOA4	Apolipoprotein A-IV	APOA4_HUMAN	1	111.437	2.11437	Dengue	QC	NaN	NaN	NaN	20.6808	0.173903
Dengue / QC	_ITTGGDVINNGLWNM[Oxidation (M)]VSVEELEHSISIK_	P07225	0.410436	0.410436	5.40437e-08	1.36491e-07	68	P07225	PROS1	Vitamin K-dependent protein S	PROS_HUMAN	1	32.9087	1.32909	Dengue	QC	NaN	NaN	NaN	27.9382	0.324311
Dengue / QC	_NGPM[Oxidation (M)]GPPGM[Oxidation (M)]PGVPGPM[Oxidation (M)]GIPGEPGEEGR_	P02747	0.954501	0.954501	5.47712e-08	1.3827e-07	24	P02747	C1QC	Complement C1q subcomponent subunit C	C1QC_HUMAN	1	93.791	1.93791	Dengue	QC	NaN	NaN	NaN	14.9797	0.146453
Dengue / QC	_DYWSTVK_	B0YIW2;P02656	1.17589	1.17589	5.49873e-08	1.38758e-07	26	B0YIW2;P02656	APOC3	Apolipoprotein C-III	B0YIW2_HUMAN;APOC3_HUMAN	1	125.933	2.25933	Dengue	QC	NaN	NaN	NaN	16.4757	0.171278
Dengue / QC	_FTVDRPFLFLIYEHR_	P05546	1.03683	1.03683	5.5133e-08	1.39009e-07	154	P05546	SERPIND1	Heparin cofactor 2	HEP2_HUMAN	1	105.171	2.05171	Dengue	QC	NaN	NaN	NaN	49.1475	0.121136
Dengue / QC	_SVQWC[Carbamidomethyl (C)]AVSQPEATK_	E7ER44;P02788	1.42316	1.42316	5.53845e-08	1.39468e-07	38	E7ER44;P02788	LTF	Lactotransferrin	E7ER44_HUMAN;TRFL_HUMAN	1	168.172	2.68172	Dengue	QC	NaN	NaN	NaN	29.523	0.234004
Dengue / QC	_QYTDSTFRVPVERK_	P00450	2.24243	2.24243	5.57365e-08	1.40237e-07	46	P00450	CP	Ceruloplasmin	CERU_HUMAN	1	373.193	4.73193	Dengue	QC	NaN	NaN	NaN	24.1371	0.24414
Dengue / QC	_NHRSPVTLLAAVMSLPEEHNK_	P18428	1.10643	1.10643	5.70176e-08	1.43221e-07	56	P18428	LBP	Lipopolysaccharide-binding protein	LBP_HUMAN	1	115.313	2.15313	Dengue	QC	NaN	NaN	NaN	46.4893	0.155218
Dengue / QC	_IVEGSDAEIGMSPWQVMLFR_	P00734	0.516168	0.516168	5.73069e-08	1.43888e-07	176	P00734	F2	Prothrombin	THRB_HUMAN	1	43.0151	1.43015	Dengue	QC	NaN	NaN	NaN	118.851	0.0806501
Dengue / QC	_SVSEINPTTQMK_	P01042	2.29879	2.29879	5.98539e-08	1.49784e-07	36	P01042	KNG1	Kininogen-1	KNG1_HUMAN	1	392.046	4.92046	Dengue	QC	NaN	NaN	NaN	16.2839	0.199903
Dengue / QC	_EC[Carbamidomethyl (C)]NNPPPSGGGR_	P10643	0.663459	0.663459	5.99884e-08	1.50058e-07	108	P10643	C7	Complement component C7	CO7_HUMAN	1	58.3876	1.58388	Dengue	QC	NaN	NaN	NaN	93.3249	0.124082
Dengue / QC	_SGGRTEHPFTVEEFVLPK_	P01023	-0.485115	0.485115	6.0982e-08	1.52228e-07	176	P01023	A2M	Alpha-2-macroglobulin	A2MG_HUMAN	1	-28.556	0.71444	Dengue	QC	NaN	NaN	NaN	59.695	0.0802991
Dengue / QC	_AFLEVNEEGSEAAASTAVVIAGR_	P01008	0.75126	0.75126	6.11507e-08	1.52585e-07	174	P01008	SERPINC1	Antithrombin-III	ANT3_HUMAN	1	68.3263	1.68326	Dengue	QC	NaN	NaN	NaN	145.89	0.114339
Dengue / QC	_EC[Carbamidomethyl (C)]SKLPLR_	P23142-4	1.58325	1.58325	6.18105e-08	1.54168e-07	20	P23142-4	FBLN1	Isoform C of Fibulin-1	FBLN1_HUMAN	1	199.644	2.99644	Dengue	QC	NaN	NaN	NaN	10.7079	0.157939
Dengue / QC	_AVDQSVLLMKPEAELSVSSVYNLLTVK_	P20742	0.592509	0.592509	6.24692e-08	1.55682e-07	96	P20742	PZP	Pregnancy zone protein	PZP_HUMAN	1	50.7867	1.50787	Dengue	QC	NaN	NaN	NaN	44.2685	0.208469
Dengue / QC	_QTSPVSAMLVLVK_	Q12805;Q12805-2;Q12805-4	2.07715	2.07715	6.3393e-08	1.57919e-07	34	Q12805;Q12805-2;Q12805-4	EFEMP1	EGF-containing fibulin-like extracellular matrix protein 1;Isoform 2 of EGF-containing fibulin-like extracellular matrix protein 1;Isoform 4 of EGF-containing fibulin-like extracellular matrix protein 1	FBLN3_HUMAN	1	321.972	4.21972	Dengue	QC	NaN	NaN	NaN	24.4735	0.296457
Dengue / QC	_S[Acetyl (Protein N-term)]DKPDM[Oxidation (M)]AEIEKFDK_	P62328	2.46028	2.46028	6.45063e-08	1.60255e-07	40	P62328	TMSB4X	Thymosin beta-4	TYB4_HUMAN	1	450.323	5.50323	Dengue	QC	NaN	NaN	NaN	31.3043	0.316666
Dengue / QC	_DRDGNTLTYYR_	P02748	-0.448041	0.448041	6.68389e-08	1.65749e-07	174	P02748	C9	Complement component C9	CO9_HUMAN	1	-26.6963	0.733037	Dengue	QC	NaN	NaN	NaN	73.2961	0.0756936
Dengue / QC	_LVGGPMDASVEEEGVR_	P01034	1.03858	1.03858	6.85865e-08	1.69734e-07	30	P01034	CST3	Cystatin-C	CYTC_HUMAN	1	105.421	2.05421	Dengue	QC	NaN	NaN	NaN	22.483	0.295431
Dengue / QC	_LVPFATELHER_	P06727	0.571843	0.571843	6.88722e-08	1.70371e-07	104	P06727	APOA4	Apolipoprotein A-IV	APOA4_HUMAN	1	48.6421	1.48642	Dengue	QC	NaN	NaN	NaN	96.8938	0.0949813
Dengue / QC	_DSDWPFC[Carbamidomethyl (C)]SDEDWNYK_	P02671	2.505	2.505	7.03542e-08	1.7361e-07	44	P02671	FGA	Fibrinogen alpha chain	FIBA_HUMAN	1	467.651	5.67651	Dengue	QC	NaN	NaN	NaN	27.5392	0.286035
Dengue / QC	_TEHGSEMLFFGNAIEGK_	P04114	0.61876	0.61876	7.2868e-08	1.78715e-07	132	P04114	APOB	Apolipoprotein B-100	APOB_HUMAN	1	53.5555	1.53556	Dengue	QC	NaN	NaN	NaN	122.636	0.101554
Dengue / QC	_LLIYDASNR_	P04433	-0.654077	0.654077	7.35288e-08	1.80042e-07	176	P04433	IGKV3-11	Immunoglobulin kappa variable 3-11	KV311_HUMAN	1	-36.4518	0.635482	Dengue	QC	NaN	NaN	NaN	47.5445	0.103271
Dengue / QC	_ALRLPPTTTC[Carbamidomethyl (C)]QQQKEELLPAQDIK_	B4E1Z4	0.633522	0.633522	7.53141e-08	1.84115e-07	176	B4E1Z4	NaN	cDNA FLJ55673, highly similar to Complement factor B (EC 3.4.21.47)	B4E1Z4_HUMAN	1	55.1348	1.55135	Dengue	QC	NaN	NaN	NaN	151.231	0.1121
Dengue / QC	_NIPC[Carbamidomethyl (C)]AVTK_	P13671	0.456937	0.456937	7.5309e-08	1.84115e-07	50	P13671	C6	Complement component C6	CO6_HUMAN	1	37.2625	1.37262	Dengue	QC	NaN	NaN	NaN	33.0177	0.0949437
Dengue / QC	_SQETGDLDVGGLQETDKIIEVEEEQEDPYLNDR_	P23142	0.890024	0.890024	7.68979e-08	1.87758e-07	114	P23142	FBLN1	Fibulin-1	FBLN1_HUMAN	1	85.3207	1.85321	Dengue	QC	NaN	NaN	NaN	75.6784	0.12943
Dengue / QC	_AGTELVNFLSYFVELGTQPATQ_	P02652;V9GYM3	1.67158	1.67158	7.69478e-08	1.87804e-07	70	P02652;V9GYM3	APOA2	Apolipoprotein A-II	APOA2_HUMAN;V9GYM3_HUMAN	1	218.563	3.18563	Dengue	QC	NaN	NaN	NaN	33.8438	0.234146
Dengue / QC	_NPDGSERPWC[Carbamidomethyl (C)]YTTDPQIER_	G3XAK1;P26927	0.656165	0.656165	7.72407e-08	1.88366e-07	28	G3XAK1;P26927	MST1	Hepatocyte growth factor-like protein	G3XAK1_HUMAN;HGFL_HUMAN	1	57.5888	1.57589	Dengue	QC	NaN	NaN	NaN	19.9115	0.0975428
Dengue / QC	_MPC[Carbamidomethyl (C)]AEDYLSVVLNQLC[Carbamidomethyl (C)]VLHEK_	P02768	0.798534	0.798534	7.8095e-08	1.90142e-07	176	P02768	ALB	Serum albumin	ALBU_HUMAN	1	73.9332	1.73933	Dengue	QC	NaN	NaN	NaN	138.373	0.159836
Dengue / QC	_EAC[Carbamidomethyl (C)]NAWLQKR_	Q9NZP8	2.30321	2.30321	7.81366e-08	1.90166e-07	42	Q9NZP8	C1RL	Complement C1r subcomponent-like protein	C1RL_HUMAN	1	393.554	4.93554	Dengue	QC	NaN	NaN	NaN	23.6904	0.430401
Dengue / QC	_NELIPLIYLENPRR_	P20742	1.81957	1.81957	7.83456e-08	1.90598e-07	142	P20742	PZP	Pregnancy zone protein	PZP_HUMAN	1	252.976	3.52976	Dengue	QC	NaN	NaN	NaN	103.734	0.302047
Dengue / QC	_VIPAC[Carbamidomethyl (C)]LPSPNYVVADRTEC[Carbamidomethyl (C)]FITGWGETQGTFGAGLLK_	P00747	0.511657	0.511657	7.87227e-08	1.91361e-07	142	P00747	PLG	Plasminogen	PLMN_HUMAN	1	42.5687	1.42569	Dengue	QC	NaN	NaN	NaN	83.3048	0.0870105
Dengue / QC	_LSINTHPSQKPLSITVR_	P01024	0.480696	0.480696	7.93647e-08	1.92766e-07	176	P01024	C3	Complement C3	CO3_HUMAN	1	39.5417	1.39542	Dengue	QC	NaN	NaN	NaN	134.036	0.0804701
Dengue / QC	_VADALTNAVAHVDDMPNALSALSDLHAHK_	P69905	0.538807	0.538807	8.08222e-08	1.95911e-07	164	P69905	HBA1	Hemoglobin subunit alpha	HBA_HUMAN	1	45.277	1.45277	Dengue	QC	NaN	NaN	NaN	148.288	0.0639681
Dengue / QC	_C[Carbamidomethyl (C)]FESFER_	Q92954-3	1.15958	1.15958	8.34491e-08	2.0171e-07	78	Q92954-3	PRG4	Isoform C of Proteoglycan 4	PRG4_HUMAN	1	123.393	2.23393	Dengue	QC	NaN	NaN	NaN	13.9324	0.130482
Dengue / QC	_YWC[Carbamidomethyl (C)]NDGKTPGAVNAC[Carbamidomethyl (C)]HLSC[Carbamidomethyl (C)]SALLQDNIADAVAC[Carbamidomethyl (C)]AK_	P61626	0.768844	0.768844	8.41426e-08	2.03305e-07	42	P61626	LYZ	Lysozyme C	LYSC_HUMAN	1	70.3904	1.7039	Dengue	QC	NaN	NaN	NaN	36.2437	0.162433
Dengue / QC	_SVDEALR_	P32119	1.27185	1.27185	8.42203e-08	2.03412e-07	118	P32119	PRDX2	Peroxiredoxin-2	PRDX2_HUMAN	1	141.471	2.41471	Dengue	QC	NaN	NaN	NaN	82.0155	0.139005
Dengue / QC	_AFQPFFVELTMPYSVIRGEAFTLK_	P01023	0.704612	0.704612	8.5573e-08	2.0643e-07	136	P01023	A2M	Alpha-2-macroglobulin	A2MG_HUMAN	1	62.9706	1.62971	Dengue	QC	NaN	NaN	NaN	110.232	0.123685
Dengue / QC	_NLC[Carbamidomethyl (C)]EAMENFMQQLK_	P20851;P20851-2	1.54714	1.54714	8.80081e-08	2.11711e-07	42	P20851;P20851-2	C4BPB	C4b-binding protein beta chain;Isoform 2 of C4b-binding protein beta chain	C4BPB_HUMAN	1	192.238	2.92238	Dengue	QC	NaN	NaN	NaN	22.7468	0.230761
Dengue / QC	_PLLEKSHC[Carbamidomethyl (C)]IAEVENDEMPADLPSLAADFVESK_	P02768	0.464771	0.464771	8.81879e-08	2.12059e-07	82	P02768	ALB	Serum albumin	ALBU_HUMAN	1	38.0098	1.3801	Dengue	QC	NaN	NaN	NaN	54.8422	0.262101
Dengue / QC	_C[Carbamidomethyl (C)]TDDVHC[Carbamidomethyl (C)]HFFTYATR_	P03951	1.46003	1.46003	9.02598e-08	2.16609e-07	20	P03951	F11	Coagulation factor XI	FA11_HUMAN	1	175.115	2.75115	Dengue	QC	NaN	NaN	NaN	11.2351	0.156272
Dengue / QC	_NNEEYLALIFEK_	O00391	1.18121	1.18121	9.20719e-08	2.20519e-07	46	O00391	QSOX1	Sulfhydryl oxidase 1	QSOX1_HUMAN	1	126.766	2.26766	Dengue	QC	NaN	NaN	NaN	26.9701	0.142501
Dengue / QC	_FDEYFSQSC[Carbamidomethyl (C)]APGSDPR_	E7ER44;P02788	1.53521	1.53521	9.29185e-08	2.22249e-07	26	E7ER44;P02788	LTF	Lactotransferrin	E7ER44_HUMAN;TRFL_HUMAN	1	189.83	2.8983	Dengue	QC	NaN	NaN	NaN	13.9567	0.296684
Dengue / QC	_AIQLTYNPDESSKPNM[Oxidation (M)]IDAATLK_	P02679;P02679-2	-0.575425	0.575425	9.29417e-08	2.22249e-07	22	P02679;P02679-2	FGG	Fibrinogen gamma chain;Isoform Gamma-A of Fibrinogen gamma chain	FIBG_HUMAN	1	-32.8912	0.671088	Dengue	QC	NaN	NaN	NaN	9.38603	0.544298
Dengue / QC	_SASNMAIVDVK_	P01023	-0.356727	0.356727	9.3063e-08	2.2245e-07	176	P01023	A2M	Alpha-2-macroglobulin	A2MG_HUMAN	1	-21.9066	0.780934	Dengue	QC	NaN	NaN	NaN	91.7367	0.0628501
Dengue / QC	_WKC[Carbamidomethyl (C)]DPVDQC[Carbamidomethyl (C)]QDSETGTFYQIGDSWEK_	P02751;P02751-15;P02751-3;P02751-7	0.594259	0.594259	9.56434e-08	2.28256e-07	166	P02751;P02751-15;P02751-3;P02751-7	FN1	Fibronectin;Isoform 15 of Fibronectin;Isoform 3 of Fibronectin;Isoform 7 of Fibronectin	FINC_HUMAN	1	50.9697	1.5097	Dengue	QC	NaN	NaN	NaN	125.842	0.0937025
Dengue / QC	_SNFLNC[Carbamidomethyl (C)]YVSGFHPSDIEVDLLK_	P61769	0.950036	0.950036	9.57042e-08	2.28311e-07	122	P61769	B2M	Beta-2-microglobulin	B2MG_HUMAN	1	93.1921	1.93192	Dengue	QC	NaN	NaN	NaN	95.6241	0.173142
Dengue / QC	_VDNALQSGNSQESVTEQDSK_	P01834	-0.477505	0.477505	9.99236e-08	2.37718e-07	176	P01834	IGKC	Immunoglobulin kappa constant	IGKC_HUMAN	1	-28.1782	0.718218	Dengue	QC	NaN	NaN	NaN	64.0663	0.0842557
Dengue / QC	_C[Carbamidomethyl (C)]TSTGWIPAPR_	P08603	0.375662	0.375662	1.00693e-07	2.3936e-07	152	P08603	CFH	Complement factor H	CFAH_HUMAN	1	29.7435	1.29743	Dengue	QC	NaN	NaN	NaN	48.5475	0.104775
Dengue / QC	_QKVLVNER_	P00739	1.36341	1.36341	1.03528e-07	2.45517e-07	100	P00739	HPR	Haptoglobin-related protein	HPTR_HUMAN	1	157.293	2.57293	Dengue	QC	NaN	NaN	NaN	56.7377	0.164596
Dengue / QC	_TPC[Carbamidomethyl (C)]QQELDQVLER_	P18065	1.45513	1.45513	1.03804e-07	2.45979e-07	22	P18065	IGFBP2	Insulin-like growth factor-binding protein 2	IBP2_HUMAN	1	174.182	2.74182	Dengue	QC	NaN	NaN	NaN	17.0012	0.151878
Dengue / QC	_TLQELKK_	P04114	1.09744	1.09744	1.05018e-07	2.48659e-07	40	P04114	APOB	Apolipoprotein B-100	APOB_HUMAN	1	113.974	2.13974	Dengue	QC	NaN	NaN	NaN	30.9417	0.154215
Dengue / QC	_TTEYYPNGGLTR_	P08519	1.96709	1.96709	1.0979e-07	2.58234e-07	120	P08519	LPA	Apolipoprotein(a)	APOA_HUMAN	1	290.978	3.90978	Dengue	QC	NaN	NaN	NaN	93.8842	0.260511
Dengue / QC	_QRAAC[Carbamidomethyl (C)]AQLNDFLQEYGTQGC[Carbamidomethyl (C)]QV_	P0C0L5	2.20106	2.20106	1.10994e-07	2.60659e-07	50	P0C0L5	C4B	Complement C4-B	CO4B_HUMAN	1	359.817	4.59817	Dengue	QC	NaN	NaN	NaN	37.953	0.323467
Dengue / QC	_SILQMSLDHHIVTPLTSLVIENEAGDER_	P19823	0.579335	0.579335	1.11184e-07	2.60902e-07	176	P19823	ITIH2	Inter-alpha-trypsin inhibitor heavy chain H2	ITIH2_HUMAN	1	49.4161	1.49416	Dengue	QC	NaN	NaN	NaN	144.119	0.0954987
Dengue / QC	_AHFSPSNIILDFPAAGSAAR_	O00391	0.665614	0.665614	1.1138e-07	2.61259e-07	48	O00391	QSOX1	Sulfhydryl oxidase 1	QSOX1_HUMAN	1	58.6243	1.58624	Dengue	QC	NaN	NaN	NaN	37.8609	0.147771
Dengue / QC	_RYKAAFTEC[Carbamidomethyl (C)]C[Carbamidomethyl (C)]QAADK_	P02768	3.38065	3.38065	1.11856e-07	2.62275e-07	50	P02768	ALB	Serum albumin	ALBU_HUMAN	1	941.542	10.4154	Dengue	QC	NaN	NaN	NaN	28.7436	0.413683
Dengue / QC	_VKLIANTLC[Carbamidomethyl (C)]NSR_	Q14520;Q14520-2	0.42173	0.42173	1.13954e-07	2.66779e-07	134	Q14520;Q14520-2	HABP2	Hyaluronan-binding protein 2;Isoform 2 of Hyaluronan-binding protein 2	HABP2_HUMAN	1	33.9533	1.33953	Dengue	QC	NaN	NaN	NaN	59.272	0.105656
Dengue / QC	_GLEWIGEIYHSGSTNYNPSLK_	A0A075B6R2	0.790985	0.790985	1.13935e-07	2.66779e-07	36	A0A075B6R2	IGHV4-4	Immunoglobulin heavy variable 4-4	HV404_HUMAN	1	73.0255	1.73025	Dengue	QC	NaN	NaN	NaN	27.597	0.20009
Dengue / QC	_QLNYKHYDGSYSTFGER_	P01023	1.95131	1.95131	1.14497e-07	2.6784e-07	114	P01023	A2M	Alpha-2-macroglobulin	A2MG_HUMAN	1	286.726	3.86726	Dengue	QC	NaN	NaN	NaN	90.9841	0.31701
Dengue / QC	_AM[Oxidation (M)]ISSPPFR_	Q9BXR6	2.56677	2.56677	1.17012e-07	2.73512e-07	18	Q9BXR6	CFHR5	Complement factor H-related protein 5	FHR5_HUMAN	1	492.481	5.92481	Dengue	QC	NaN	NaN	NaN	5.43319	0.107897
Dengue / QC	_EATEAAKC[Carbamidomethyl (C)]NLLAEK_	P02765	1.11106	1.11106	1.17981e-07	2.75669e-07	146	P02765	AHSG	Alpha-2-HS-glycoprotein	FETUA_HUMAN	1	116.004	2.16004	Dengue	QC	NaN	NaN	NaN	132.444	0.186285
Dengue / QC	_LMIYDVSK_	P01706	-0.802898	0.802898	1.19676e-07	2.79522e-07	176	P01706	IGLV2-11	Immunoglobulin lambda variable 2-11	LV211_HUMAN	1	-42.6803	0.573197	Dengue	QC	NaN	NaN	NaN	108.342	0.140474
Dengue / QC	_EALIQFLEQVHQGIK_	P15169	1.01066	1.01066	1.21064e-07	2.82217e-07	84	P15169	CPN1	Carboxypeptidase N catalytic chain	CBPN_HUMAN	1	101.483	2.01483	Dengue	QC	NaN	NaN	NaN	66.4187	0.132165
Dengue / QC	_TFVNITPAEVGVLVGK_	P07737	1.23532	1.23532	1.2476e-07	2.90384e-07	48	P07737	PFN1	Profilin-1	PROF1_HUMAN	1	135.433	2.35433	Dengue	QC	NaN	NaN	NaN	22.1101	0.204615
Dengue / QC	_LM[Oxidation (M)]NIFLKDSITTWEILAVSMSDKK_	P01024	1.13006	1.13006	1.25184e-07	2.91257e-07	88	P01024	C3	Complement C3	CO3_HUMAN	1	118.868	2.18868	Dengue	QC	NaN	NaN	NaN	58.8352	0.16678
Dengue / QC	_VKENFDKAR_	P02753;Q5VY30	2.20688	2.20688	1.25702e-07	2.9235e-07	82	P02753;Q5VY30	RBP4	Retinol-binding protein 4;Retinol binding protein 4, plasma, isoform CRA_b	RET4_HUMAN;Q5VY30_HUMAN	1	361.677	4.61677	Dengue	QC	NaN	NaN	NaN	72.26	0.329664
Dengue / QC	_TLLVEAEGIEQEK_	P20742	2.46453	2.46453	1.26861e-07	2.94819e-07	92	P20742	PZP	Pregnancy zone protein	PZP_HUMAN	1	451.948	5.51948	Dengue	QC	NaN	NaN	NaN	63.8889	0.426885
Dengue / QC	_QAAGSGHLLALGTPENPSWLSLHLQDQK_	I3L145;P04278	0.735544	0.735544	1.27096e-07	2.95251e-07	62	I3L145;P04278	SHBG	Sex hormone-binding globulin	I3L145_HUMAN;SHBG_HUMAN	1	66.5025	1.66503	Dengue	QC	NaN	NaN	NaN	42.4189	0.170488
Dengue / QC	_LVDEDMNSFK_	Q06033;Q06033-2	-0.487712	0.487712	1.28581e-07	2.9824e-07	174	Q06033;Q06033-2	ITIH3	Inter-alpha-trypsin inhibitor heavy chain H3;Isoform 2 of Inter-alpha-trypsin inhibitor heavy chain H3	ITIH3_HUMAN	1	-28.6845	0.713155	Dengue	QC	NaN	NaN	NaN	61.3714	0.0788155
Dengue / QC	_IALGGLLFPASNLR_	I3L145;P04278	1.36043	1.36043	1.32499e-07	3.06619e-07	62	I3L145;P04278	SHBG	Sex hormone-binding globulin	I3L145_HUMAN;SHBG_HUMAN	1	156.762	2.56762	Dengue	QC	NaN	NaN	NaN	38.6903	0.282662
Dengue / QC	_PVEEYANC[Carbamidomethyl (C)]HLAR_	P02787	1.90942	1.90942	1.33222e-07	3.07821e-07	32	P02787	TF	Serotransferrin	TRFE_HUMAN	1	275.657	3.75657	Dengue	QC	NaN	NaN	NaN	17.5087	0.683068
Dengue / QC	_IEPSQAK_	P48740	0.388849	0.388849	1.33932e-07	3.09225e-07	38	P48740	MASP1	Mannan-binding lectin serine protease 1	MASP1_HUMAN	1	30.9348	1.30935	Dengue	QC	NaN	NaN	NaN	30.6052	0.114499
Dengue / QC	_ASQGISNSLAWYQQKPGK_	A0A0G2JRQ6	1.46882	1.46882	1.34391e-07	3.10164e-07	50	A0A0G2JRQ6	NaN	Uncharacterized protein (Fragment)	A0A0G2JRQ6_HUMAN	1	176.796	2.76796	Dengue	QC	NaN	NaN	NaN	26.5471	0.209969
Dengue / QC	_DPTPEQTHR_	P08697	0.495517	0.495517	1.35444e-07	3.12116e-07	122	P08697	SERPINF2	Alpha-2-antiplasmin	A2AP_HUMAN	1	40.9826	1.40983	Dengue	QC	NaN	NaN	NaN	67.2179	0.104391
Dengue / QC	_TIKVPMMYGAGK_	G3V2W1;Q9UK55	0.456763	0.456763	1.36146e-07	3.13615e-07	78	G3V2W1;Q9UK55	SERPINA10	Protein Z-dependent protease inhibitor	G3V2W1_HUMAN;ZPI_HUMAN	1	37.2459	1.37246	Dengue	QC	NaN	NaN	NaN	51.3189	0.0945464
Dengue / QC	_NTLIIYLDKVSHSEDDC[Carbamidomethyl (C)]LAFK_	P01024	0.571137	0.571137	1.37493e-07	3.16354e-07	150	P01024	C3	Complement C3	CO3_HUMAN	1	48.5694	1.48569	Dengue	QC	NaN	NaN	NaN	122.624	0.108402
Dengue / QC	_GVALHRPDVYLLPPAR_	P01871	-0.631444	0.631444	1.38713e-07	3.19041e-07	176	P01871	IGHM	Immunoglobulin heavy constant mu	IGHM_HUMAN	1	-35.447	0.64553	Dengue	QC	NaN	NaN	NaN	48.0575	0.101428
Dengue / QC	_DASGVTFTWTPSSGKSAVQGPPER_	P01876	1.75669	1.75669	1.3899e-07	3.19554e-07	44	P01876	IGHA1	Immunoglobulin heavy constant alpha 1	IGHA1_HUMAN	1	237.923	3.37923	Dengue	QC	NaN	NaN	NaN	28.4614	0.320493
Dengue / QC	_SVLRPSQFGGQPC[Carbamidomethyl (C)]TAPLVAFQPC[Carbamidomethyl (C)]IPSKLC[Carbamidomethyl (C)]K_	P13671	1.39023	1.39023	1.39162e-07	3.19829e-07	90	P13671	C6	Complement component C6	CO6_HUMAN	1	162.121	2.62121	Dengue	QC	NaN	NaN	NaN	66.2669	0.227404
Dengue / QC	_YLYEIARRHPYFYAPELLFFAK_	P02768	0.50857	0.50857	1.40342e-07	3.21927e-07	148	P02768	ALB	Serum albumin	ALBU_HUMAN	1	42.2639	1.42264	Dengue	QC	NaN	NaN	NaN	91.7274	0.0892635
Dengue / QC	_DIFTGLIGPM[Oxidation (M)]K_	P00450	0.974668	0.974668	1.41287e-07	3.23972e-07	34	P00450	CP	Ceruloplasmin	CERU_HUMAN	1	96.5188	1.96519	Dengue	QC	NaN	NaN	NaN	21.7021	0.160034
Dengue / QC	_LISVDTEHSNIYLQNGPDRIGR_	P00450	0.630181	0.630181	1.43723e-07	3.29306e-07	120	P00450	CP	Ceruloplasmin	CERU_HUMAN	1	54.7759	1.54776	Dengue	QC	NaN	NaN	NaN	88.5481	0.0910837
Dengue / QC	_TVM[Oxidation (M)]VNIENPEGIPVKQDSLSSQNQLGVLPLSWDIPELVNM[Oxidation (M)]GQWK_	P01024	0.758575	0.758575	1.44327e-07	3.30565e-07	74	P01024	C3	Complement C3	CO3_HUMAN	1	69.1818	1.69182	Dengue	QC	NaN	NaN	NaN	55.2228	0.127972
Dengue / QC	_IIPFNRLTIGEGQQHHLGGAK_	P02679;P02679-2	1.43382	1.43382	1.45604e-07	3.32983e-07	30	P02679;P02679-2	FGG	Fibrinogen gamma chain;Isoform Gamma-A of Fibrinogen gamma chain	FIBG_HUMAN	1	170.162	2.70162	Dengue	QC	NaN	NaN	NaN	22.622	0.126538
Dengue / QC	_TPENYPNAGLTR_	P08519	1.69273	1.69273	1.46998e-07	3.35916e-07	90	P08519	LPA	Apolipoprotein(a)	APOA_HUMAN	1	223.268	3.23268	Dengue	QC	NaN	NaN	NaN	79.6105	0.288704
Dengue / QC	_EQLNLRESATITC[Carbamidomethyl (C)]LVTGFSPADVFVQWMQR_	P01871	0.85878	0.85878	1.49726e-07	3.41244e-07	30	P01871	IGHM	Immunoglobulin heavy constant mu	IGHM_HUMAN	1	81.3504	1.8135	Dengue	QC	NaN	NaN	NaN	12.4929	0.686573
Dengue / QC	_INENTGSVSVTR_	P55290;P55290-4	0.633803	0.633803	1.50227e-07	3.42127e-07	112	P55290;P55290-4	CDH13	Cadherin-13;Isoform 4 of Cadherin-13	CAD13_HUMAN	1	55.165	1.55165	Dengue	QC	NaN	NaN	NaN	39.1542	0.152637
Dengue / QC	_EC[Carbamidomethyl (C)]VGFEAVQEVPVGLVQPASATLYDYYNPER_	P0C0L5	0.516261	0.516261	1.51982e-07	3.45601e-07	160	P0C0L5	C4B	Complement C4-B	CO4B_HUMAN	1	43.0244	1.43024	Dengue	QC	NaN	NaN	NaN	118.657	0.10454
Dengue / QC	_LVGGDNLC[Carbamidomethyl (C)]SGRLEVLHK_	O43866	1.65971	1.65971	1.53154e-07	3.48135e-07	70	O43866	CD5L	CD5 antigen-like	CD5L_HUMAN	1	215.953	3.15953	Dengue	QC	NaN	NaN	NaN	59.7862	0.176317
Dengue / QC	_RLTLQGIISWGSGC[Carbamidomethyl (C)]GDR_	P00748	1.10748	1.10748	1.60997e-07	3.64861e-07	110	P00748	F12	Coagulation factor XII	FA12_HUMAN	1	115.469	2.15469	Dengue	QC	NaN	NaN	NaN	70.5929	0.220018
Dengue / QC	_ATWSGAVLAGR_	P04217	-0.518864	0.518864	1.63491e-07	3.69957e-07	160	P04217	A1BG	Alpha-1B-glycoprotein	A1BG_HUMAN	1	-30.2079	0.697921	Dengue	QC	NaN	NaN	NaN	44.8741	0.0860121
Dengue / QC	_FSGSGSGTDFTLTISSLEPEDFAVYYC[Carbamidomethyl (C)]QQR_	P04433	1.33136	1.33136	1.70047e-07	3.84071e-07	58	P04433	IGKV3-11	Immunoglobulin kappa variable 3-11	KV311_HUMAN	1	151.64	2.5164	Dengue	QC	NaN	NaN	NaN	19.312	0.151744
Dengue / QC	_VPMMYGAGK_	G3V2W1;Q9UK55	1.11594	1.11594	1.70935e-07	3.85788e-07	20	G3V2W1;Q9UK55	SERPINA10	Protein Z-dependent protease inhibitor	G3V2W1_HUMAN;ZPI_HUMAN	1	116.737	2.16737	Dengue	QC	NaN	NaN	NaN	9.54756	0.188531
Dengue / QC	_AGPHC[Carbamidomethyl (C)]PTAQLIATLKNGRK_	P10720	1.41514	1.41514	1.72085e-07	3.87661e-07	20	P10720	PF4V1	Platelet factor 4 variant	PF4V_HUMAN	1	166.686	2.66686	Dengue	QC	NaN	NaN	NaN	13.6761	0.187504
Dengue / QC	_EFNPLVIVGLSK_	A0A0A0MRJ7;P12259	0.687009	0.687009	1.73181e-07	3.8998e-07	100	A0A0A0MRJ7;P12259	F5	Coagulation factor V	A0A0A0MRJ7_HUMAN;FA5_HUMAN	1	60.9942	1.60994	Dengue	QC	NaN	NaN	NaN	48.2036	0.179994
Dengue / QC	_GSESGIFTNTK_	P02671	1.57576	1.57576	1.74903e-07	3.93417e-07	166	P02671	FGA	Fibrinogen alpha chain	FIBA_HUMAN	1	198.093	2.98093	Dengue	QC	NaN	NaN	NaN	126.388	0.250665
Dengue / QC	_EC[Carbamidomethyl (C)]ELPKIDVHLVPDRK_	P08603	0.997385	0.997385	1.75674e-07	3.95004e-07	32	P08603	CFH	Complement factor H	CFAH_HUMAN	1	99.6378	1.99638	Dengue	QC	NaN	NaN	NaN	21.6791	0.247613
Dengue / QC	_LGDVYVNDAFGTAHR_	P00558	2.28733	2.28733	1.77638e-07	3.98974e-07	30	P00558	PGK1	Phosphoglycerate kinase 1	PGK1_HUMAN	1	388.151	4.88151	Dengue	QC	NaN	NaN	NaN	19.5461	0.24503
Dengue / QC	_DEPTYILNIK_	P04114	0.588606	0.588606	1.79166e-07	4.02255e-07	62	P04114	APOB	Apolipoprotein B-100	APOB_HUMAN	1	50.3793	1.50379	Dengue	QC	NaN	NaN	NaN	50.54	0.148855
Dengue / QC	_C[Carbamidomethyl (C)]C[Carbamidomethyl (C)]QDGVTRLPMMR_	P0C0L5	1.28209	1.28209	1.82558e-07	4.09413e-07	176	P0C0L5	C4B	Complement C4-B	CO4B_HUMAN	1	143.191	2.43191	Dengue	QC	NaN	NaN	NaN	141.002	0.202049
Dengue / QC	_LVTDLTKVHTEC[Carbamidomethyl (C)]C[Carbamidomethyl (C)]HGDLLEC[Carbamidomethyl (C)]ADDRADLAK_	P02768	1.13121	1.13121	1.8305e-07	4.10365e-07	176	P02768	ALB	Serum albumin	ALBU_HUMAN	1	119.043	2.19043	Dengue	QC	NaN	NaN	NaN	154.074	0.188661
Dengue / QC	_NAIGGKFPLYNLGFGNNLNYNFLENM[Oxidation (M)]ALENHGFAR_	Q06033;Q06033-2	0.534179	0.534179	1.89281e-07	4.22918e-07	54	Q06033;Q06033-2	ITIH3	Inter-alpha-trypsin inhibitor heavy chain H3;Isoform 2 of Inter-alpha-trypsin inhibitor heavy chain H3	ITIH3_HUMAN	1	44.8118	1.44812	Dengue	QC	NaN	NaN	NaN	21.309	0.795682
Dengue / QC	_VTTVASHTSDSDVPSGVTEVVVKLFDSDPITVTVPVEVSR_	P10909;P10909-2;P10909-4;P10909-5	0.80922	0.80922	1.89626e-07	4.2353e-07	120	P10909;P10909-2;P10909-4;P10909-5	CLU	Clusterin;Isoform 2 of Clusterin;Isoform 4 of Clusterin;Isoform 5 of Clusterin	CLUS_HUMAN	1	75.2263	1.75226	Dengue	QC	NaN	NaN	NaN	80.8147	0.158781
Dengue / QC	_NLSVEDAAR_	P04040	1.71842	1.71842	1.89931e-07	4.23897e-07	28	P04040	CAT	Catalase	CATA_HUMAN	1	229.075	3.29075	Dengue	QC	NaN	NaN	NaN	21.0429	0.232686
Dengue / QC	_TNTNVNC[Carbamidomethyl (C)]PIEC[Carbamidomethyl (C)]FMPLDVQADREDSRE_	P02751;P02751-15;P02751-3;P02751-7	1.01899	1.01899	1.91629e-07	4.27055e-07	132	P02751;P02751-15;P02751-3;P02751-7	FN1	Fibronectin;Isoform 15 of Fibronectin;Isoform 3 of Fibronectin;Isoform 7 of Fibronectin	FINC_HUMAN	1	102.65	2.0265	Dengue	QC	NaN	NaN	NaN	116.018	0.148688
Dengue / QC	_KALDNLAR_	O14791;O14791-2	1.22737	1.22737	1.93859e-07	4.31546e-07	32	O14791;O14791-2	APOL1	Apolipoprotein L1;Isoform 2 of Apolipoprotein L1	APOL1_HUMAN	1	134.14	2.3414	Dengue	QC	NaN	NaN	NaN	8.84929	0.123975
Dengue / QC	_TFPGFFSPMLGEFVSETESR_	P02671	1.91351	1.91351	1.94253e-07	4.32264e-07	174	P02671	FGA	Fibrinogen alpha chain	FIBA_HUMAN	1	276.723	3.76723	Dengue	QC	NaN	NaN	NaN	138.889	0.354842
Dengue / QC	_LLIYDASNLETGVPSR_	P01593;P01594	-0.825486	0.825486	1.95291e-07	4.34253e-07	176	P01593;P01594	IGKV1D-33;IGKV1-33	Immunoglobulin kappa variable 1D-33;Immunoglobulin kappa variable 1-33	KVD33_HUMAN;KV133_HUMAN	1	-43.5708	0.564292	Dengue	QC	NaN	NaN	NaN	53.9551	0.123671
Dengue / QC	_C[Carbamidomethyl (C)]DPHEATC[Carbamidomethyl (C)]YDDGK_	P02751;P02751-15;P02751-3;P02751-7	1.00904	1.00904	1.99307e-07	4.42691e-07	50	P02751;P02751-15;P02751-3;P02751-7	FN1	Fibronectin;Isoform 15 of Fibronectin;Isoform 3 of Fibronectin;Isoform 7 of Fibronectin	FINC_HUMAN	1	101.257	2.01257	Dengue	QC	NaN	NaN	NaN	32.328	0.235143
Dengue / QC	_FGNADGAAC[Carbamidomethyl (C)]HFPFIFEGR_	P14780	2.01984	2.01984	2.00379e-07	4.4491e-07	20	P14780	MMP9	Matrix metalloproteinase-9	MMP9_HUMAN	1	305.54	4.0554	Dengue	QC	NaN	NaN	NaN	13.7757	0.284535
Dengue / QC	_WDEELAAFAK_	Q6UXB8	0.559117	0.559117	2.02947e-07	4.49984e-07	70	Q6UXB8	PI16	Peptidase inhibitor 16	PI16_HUMAN	1	47.3367	1.47337	Dengue	QC	NaN	NaN	NaN	50.8397	0.107765
Dengue / QC	_GQVVKGSVFLRNPSR_	P0C0L5	0.935142	0.935142	2.05845e-07	4.55703e-07	158	P0C0L5	C4B	Complement C4-B	CO4B_HUMAN	1	91.2078	1.91208	Dengue	QC	NaN	NaN	NaN	124.741	0.127851
Dengue / QC	_SPLFMGK_	P01009	-0.360237	0.360237	2.08529e-07	4.61306e-07	176	P01009	SERPINA1	Alpha-1-antitrypsin	A1AT_HUMAN	1	-22.0964	0.779036	Dengue	QC	NaN	NaN	NaN	80.9232	0.0658434
Dengue / QC	_GEYEEHLGILGPIIR_	A0A0A0MRJ7;P12259	0.426555	0.426555	2.11576e-07	4.67532e-07	138	A0A0A0MRJ7;P12259	F5	Coagulation factor V	A0A0A0MRJ7_HUMAN;FA5_HUMAN	1	34.402	1.34402	Dengue	QC	NaN	NaN	NaN	93.202	0.0851486
Dengue / QC	_C[Carbamidomethyl (C)]VPVC[Carbamidomethyl (C)]GVPREPFEEKQR_	P09871	1.36359	1.36359	2.13174e-07	4.70891e-07	120	P09871	C1S	Complement C1s subcomponent	C1S_HUMAN	1	157.324	2.57324	Dengue	QC	NaN	NaN	NaN	106.116	0.190079
Dengue / QC	_SLEDLQLTHNKITK_	P51884	0.625393	0.625393	2.17535e-07	4.79293e-07	130	P51884	LUM	Lumican	LUM_HUMAN	1	54.2631	1.54263	Dengue	QC	NaN	NaN	NaN	102.156	0.106753
Dengue / QC	_TILDDLR_	P19823	0.795115	0.795115	2.21248e-07	4.86164e-07	56	P19823	ITIH2	Inter-alpha-trypsin inhibitor heavy chain H2	ITIH2_HUMAN	1	73.5215	1.73522	Dengue	QC	NaN	NaN	NaN	49.1046	0.128937
Dengue / QC	_NELIPLIYLENPR_	P20742	1.90158	1.90158	2.21299e-07	4.86164e-07	66	P20742	PZP	Pregnancy zone protein	PZP_HUMAN	1	273.622	3.73622	Dengue	QC	NaN	NaN	NaN	43.8556	0.413487
Dengue / QC	_LVGGPM[Oxidation (M)]DASVEEEGVRR_	P01034	2.64771	2.64771	2.22243e-07	4.87882e-07	16	P01034	CST3	Cystatin-C	CYTC_HUMAN	1	526.673	6.26673	Dengue	QC	NaN	NaN	NaN	10.1994	0.298044
Dengue / QC	_C[Carbamidomethyl (C)]QKRPC[Carbamidomethyl (C)]GHPGDTPFGTFTLTGGNVFEYGVK_	P08603	1.94885	1.94885	2.23348e-07	4.8995e-07	62	P08603	CFH	Complement factor H	CFAH_HUMAN	1	286.066	3.86066	Dengue	QC	NaN	NaN	NaN	51.4128	0.279883
Dengue / QC	_ALSGFSLQSC[Carbamidomethyl (C)]R_	P03951	1.21542	1.21542	2.249e-07	4.92818e-07	56	P03951	F11	Coagulation factor XI	FA11_HUMAN	1	132.208	2.32208	Dengue	QC	NaN	NaN	NaN	32.1382	0.152093
Dengue / QC	_NALTGLPPGLFQASATLDTLVLK_	P02750	0.534662	0.534662	2.27202e-07	4.975e-07	128	P02750	LRG1	Leucine-rich alpha-2-glycoprotein	A2GL_HUMAN	1	44.8603	1.4486	Dengue	QC	NaN	NaN	NaN	105.27	0.112168
Dengue / QC	_RPDFC[Carbamidomethyl (C)]PFQC[Carbamidomethyl (C)]PAHSHYELC[Carbamidomethyl (C)]GDSC[Carbamidomethyl (C)]PGSC[Carbamidomethyl (C)]PSLSAPEGC[Carbamidomethyl (C)]ESAC[Carbamidomethyl (C)]R_	Q9Y6R7	1.55111	1.55111	2.29124e-07	5.01344e-07	52	Q9Y6R7	FCGBP	IgGFc-binding protein	FCGBP_HUMAN	1	193.042	2.93042	Dengue	QC	NaN	NaN	NaN	40.1143	0.274622
Dengue / QC	_GLMAALC[Carbamidomethyl (C)]PHKFPAIQNLALR_	P08571	0.52611	0.52611	2.30334e-07	5.03809e-07	124	P08571	CD14	Monocyte differentiation antigen CD14	CD14_HUMAN	1	44.0041	1.44004	Dengue	QC	NaN	NaN	NaN	74.4453	0.0987544
Dengue / QC	_DLATVYVDVLKDSGRDYVSQFEGSALGK_	P02647	0.652321	0.652321	2.30795e-07	5.0445e-07	120	P02647	APOA1	Apolipoprotein A-I	APOA1_HUMAN	1	57.1695	1.57169	Dengue	QC	NaN	NaN	NaN	41.681	0.102813
Dengue / QC	_VGYVSGWGRNANFK_	P00738	0.966856	0.966856	2.3333e-07	5.09252e-07	54	P00738	HP	Haptoglobin	HPT_HUMAN	1	95.4577	1.95458	Dengue	QC	NaN	NaN	NaN	44.1288	0.141359
Dengue / QC	_IQALQQQADEAEDRAQGLQR_	P67936	0.964043	0.964043	2.37028e-07	5.16576e-07	64	P67936	TPM4	Tropomyosin alpha-4 chain	TPM4_HUMAN	1	95.077	1.95077	Dengue	QC	NaN	NaN	NaN	45.2054	0.151627
Dengue / QC	_FRVVSVDENFRPR_	P20742	1.97971	1.97971	2.39912e-07	5.22294e-07	108	P20742	PZP	Pregnancy zone protein	PZP_HUMAN	1	294.413	3.94413	Dengue	QC	NaN	NaN	NaN	76.5706	0.336535
Dengue / QC	_AIAANEADAVTLDAGLVYDAYLAPNNLKPVVAEFYGSK_	P02787	0.426686	0.426686	2.40265e-07	5.22874e-07	174	P02787	TF	Serotransferrin	TRFE_HUMAN	1	34.4143	1.34414	Dengue	QC	NaN	NaN	NaN	82.4022	0.0931244
Dengue / QC	_GGSTSYGTGSETESPR_	P02671	2.0494	2.0494	2.40953e-07	5.24183e-07	122	P02671	FGA	Fibrinogen alpha chain	FIBA_HUMAN	1	313.934	4.13934	Dengue	QC	NaN	NaN	NaN	92.5713	0.338037
Dengue / QC	_MADEAGSEADHEGTHSTK_	P02671	1.45673	1.45673	2.41321e-07	5.24793e-07	164	P02671	FGA	Fibrinogen alpha chain	FIBA_HUMAN	1	174.485	2.74485	Dengue	QC	NaN	NaN	NaN	154.937	0.254978
Dengue / QC	_HPPSPTRDEC[Carbamidomethyl (C)]FAR_	Q16610	1.31831	1.31831	2.46469e-07	5.34446e-07	66	Q16610	ECM1	Extracellular matrix protein 1	ECM1_HUMAN	1	149.373	2.49373	Dengue	QC	NaN	NaN	NaN	53.7384	0.281132
Dengue / QC	_VSITSITVENVFVK_	P01031	0.878103	0.878103	2.46418e-07	5.34446e-07	62	P01031	C5	Complement C5	CO5_HUMAN	1	83.7957	1.83796	Dengue	QC	NaN	NaN	NaN	52.7366	0.145769
Dengue / QC	_YEGGREHVAHLLFLRDTK_	P19652	1.14178	1.14178	2.47694e-07	5.36909e-07	124	P19652	ORM2	Alpha-1-acid glycoprotein 2	A1AG2_HUMAN	1	120.653	2.20653	Dengue	QC	NaN	NaN	NaN	113.047	0.16914
Dengue / QC	_YYWGGQYTWDMAK_	P02675	2.94557	2.94557	2.48096e-07	5.37393e-07	102	P02675	FGB	Fibrinogen beta chain	FIBB_HUMAN	1	670.379	7.70379	Dengue	QC	NaN	NaN	NaN	73.2367	0.423772
Dengue / QC	_TNGVC[Carbamidomethyl (C)]VDWR_	P04275	1.09589	1.09589	2.51679e-07	5.44761e-07	64	P04275	VWF	von Willebrand factor	VWF_HUMAN	1	113.745	2.13745	Dengue	QC	NaN	NaN	NaN	51.4135	0.160357
Dengue / QC	_EQVQSC[Carbamidomethyl (C)]GPPPELLNGNVKEK_	P08603	0.588608	0.588608	2.568e-07	5.55248e-07	154	P08603	CFH	Complement factor H	CFAH_HUMAN	1	50.3795	1.50379	Dengue	QC	NaN	NaN	NaN	138.556	0.0978292
Dengue / QC	_ALNSIIDVYHK_	P05109	2.25535	2.25535	2.57234e-07	5.55988e-07	34	P05109	S100A8	Protein S100-A8	S10A8_HUMAN	1	377.451	4.77451	Dengue	QC	NaN	NaN	NaN	15.951	0.210001
Dengue / QC	_NSADNKVVC[Carbamidomethyl (C)]SC[Carbamidomethyl (C)]TEGYR_	P00740	0.836866	0.836866	2.57355e-07	5.56049e-07	108	P00740	F9	Coagulation factor IX	FA9_HUMAN	1	78.6166	1.78617	Dengue	QC	NaN	NaN	NaN	100.235	0.127106
Dengue / QC	_LVNIAVDER_	A0A0C4DFP6;Q9NQ79;Q9NQ79-2	0.508081	0.508081	2.5947e-07	5.59817e-07	136	A0A0C4DFP6;Q9NQ79;Q9NQ79-2	CRTAC1	Cartilage acidic protein 1;Cartilage acidic protein 1;Isoform 2 of Cartilage acidic protein 1	A0A0C4DFP6_HUMAN;CRAC1_HUMAN;CRAC1_HUMAN	1	42.2157	1.42216	Dengue	QC	NaN	NaN	NaN	73.1857	0.109998
Dengue / QC	_ILLM[Oxidation (M)]DLNEEDPTVLELGITGSK_	P27169	1.01928	1.01928	2.63884e-07	5.68321e-07	68	P27169	PON1	Serum paraoxonase/arylesterase 1	PON1_HUMAN	1	102.69	2.0269	Dengue	QC	NaN	NaN	NaN	21.5909	0.235514
Dengue / QC	_APGWDPLC[Carbamidomethyl (C)]WDEC[Carbamidomethyl (C)]R_	Q9Y6R7	1.36293	1.36293	2.64276e-07	5.68962e-07	72	Q9Y6R7	FCGBP	IgGFc-binding protein	FCGBP_HUMAN	1	157.207	2.57207	Dengue	QC	NaN	NaN	NaN	63.4615	0.239575
Dengue / QC	_FQILTLWLPDSLTTWEIHGLSLSK_	P0C0L5	0.517671	0.517671	2.65065e-07	5.70459e-07	70	P0C0L5	C4B	Complement C4-B	CO4B_HUMAN	1	43.1642	1.43164	Dengue	QC	NaN	NaN	NaN	52.1993	0.133274
Dengue / QC	_WYQMGIVSWGEGC[Carbamidomethyl (C)]DRDGK_	P00734	0.35836	0.35836	2.69206e-07	5.78542e-07	48	P00734	F2	Prothrombin	THRB_HUMAN	1	28.1968	1.28197	Dengue	QC	NaN	NaN	NaN	36.6473	0.0736371
Dengue / QC	_SLDFNTLVDNISVDPETGDLWVGC[Carbamidomethyl (C)]HPNGMK_	P27169	0.642375	0.642375	2.70393e-07	5.8068e-07	104	P27169	PON1	Serum paraoxonase/arylesterase 1	PON1_HUMAN	1	56.0896	1.5609	Dengue	QC	NaN	NaN	NaN	37.7034	0.104003
Dengue / QC	_GADVWFK_	P05109	1.69913	1.69913	2.71907e-07	5.83516e-07	52	P05109	S100A8	Protein S100-A8	S10A8_HUMAN	1	224.704	3.24704	Dengue	QC	NaN	NaN	NaN	25.2791	0.22639
Dengue / QC	_GEC[Carbamidomethyl (C)]QAEGVLFFQGDREWFWDLATGTMKER_	P02790	1.20973	1.20973	2.74439e-07	5.87903e-07	84	P02790	HPX	Hemopexin	HEMO_HUMAN	1	131.295	2.31295	Dengue	QC	NaN	NaN	NaN	30.281	0.161513
Dengue / QC	_YYGGGYGSTQATFMVFQALAQYQK_	P01024	0.647575	0.647575	2.83317e-07	6.04986e-07	136	P01024	C3	Complement C3	CO3_HUMAN	1	56.6532	1.56653	Dengue	QC	NaN	NaN	NaN	90.0484	0.117637
Dengue / QC	_AEPLAFTFSHDYK_	P04114	0.474169	0.474169	2.83927e-07	6.06073e-07	116	P04114	APOB	Apolipoprotein B-100	APOB_HUMAN	1	38.9118	1.38912	Dengue	QC	NaN	NaN	NaN	83.4221	0.0757802
Dengue / QC	_IPC[Carbamidomethyl (C)]FLAGDTR_	P05164;P05164-2;P05164-3	1.66184	1.66184	2.86881e-07	6.11729e-07	28	P05164;P05164-2;P05164-3	MPO	Myeloperoxidase;Isoform H14 of Myeloperoxidase;Isoform H7 of Myeloperoxidase	PERM_HUMAN	1	216.421	3.16421	Dengue	QC	NaN	NaN	NaN	20.3897	0.198934
Dengue / QC	_FQLFGSPSGQK_	E7ER44;P02788	1.32295	1.32295	2.91055e-07	6.1997e-07	48	E7ER44;P02788	LTF	Lactotransferrin	E7ER44_HUMAN;TRFL_HUMAN	1	150.176	2.50176	Dengue	QC	NaN	NaN	NaN	37.3047	0.251796
Dengue / QC	_KGGVASGFK_	P06396	0.872195	0.872195	2.9993e-07	6.37298e-07	80	P06396	GSN	Gelsolin	GELS_HUMAN	1	83.0445	1.83045	Dengue	QC	NaN	NaN	NaN	58.2263	0.16415
Dengue / QC	_YHFEALADTGISSEFYDNANDLLSK_	P07357	0.840443	0.840443	3.02328e-07	6.41716e-07	112	P07357	C8A	Complement component C8 alpha chain	CO8A_HUMAN	1	79.06	1.7906	Dengue	QC	NaN	NaN	NaN	49.6295	0.13199
Dengue / QC	_SC[Carbamidomethyl (C)]DIPVFM[Oxidation (M)]NAR_	P08603	0.802338	0.802338	3.10443e-07	6.58243e-07	122	P08603	CFH	Complement factor H	CFAH_HUMAN	1	74.3925	1.74393	Dengue	QC	NaN	NaN	NaN	106.672	0.146411
Dengue / QC	_DLLAGLPAPGVEVYC[Carbamidomethyl (C)]LYGVGLPTPR_	P04180	0.572262	0.572262	3.10672e-07	6.58498e-07	84	P04180	LCAT	Phosphatidylcholine-sterol acyltransferase	LCAT_HUMAN	1	48.6853	1.48685	Dengue	QC	NaN	NaN	NaN	18.0403	0.0952614
Dengue / QC	_WSHPPSC[Carbamidomethyl (C)]IKTDC[Carbamidomethyl (C)]LSLPSFENAIPMGEK_	P08603	1.17342	1.17342	3.10832e-07	6.58604e-07	106	P08603	CFH	Complement factor H	CFAH_HUMAN	1	125.546	2.25546	Dengue	QC	NaN	NaN	NaN	94.3165	0.195704
Dengue / QC	_AITPPHPASQANIIFDITEGNLRDSFDIIKR_	P23142	1.01166	1.01166	3.11161e-07	6.5884e-07	58	P23142	FBLN1	Fibulin-1	FBLN1_HUMAN	1	101.622	2.01622	Dengue	QC	NaN	NaN	NaN	47.5073	0.148816
Dengue / QC	_FRC[Carbamidomethyl (C)]PEALFQPSFLGMESC[Carbamidomethyl (C)]GIHETTFNSIMK_	P60709	1.63733	1.63733	3.15724e-07	6.67563e-07	46	P60709	ACTB	Actin, cytoplasmic 1	ACTB_HUMAN	1	211.089	3.11089	Dengue	QC	NaN	NaN	NaN	35.1133	0.240603
Dengue / QC	_YDVENC[Carbamidomethyl (C)]LANK_	P01023	-0.436965	0.436965	3.18907e-07	6.73348e-07	172	P01023	A2M	Alpha-2-macroglobulin	A2MG_HUMAN	1	-26.1313	0.738687	Dengue	QC	NaN	NaN	NaN	118.255	0.0791361
Dengue / QC	_A[Acetyl (Protein N-term)]GWNAYIDNLMADGTC[Carbamidomethyl (C)]QDAAIVGYK_	P07737	0.507138	0.507138	3.26611e-07	6.8865e-07	56	P07737	PFN1	Profilin-1	PROF1_HUMAN	1	42.1228	1.42123	Dengue	QC	NaN	NaN	NaN	49.0377	0.12498
Dengue / QC	_WDFDNRPHILHGEYIEFIC[Carbamidomethyl (C)]R_	P05160	0.962514	0.962514	3.33813e-07	7.03095e-07	40	P05160	F13B	Coagulation factor XIII B chain	F13B_HUMAN	1	94.8703	1.9487	Dengue	QC	NaN	NaN	NaN	32.6337	0.159548
Dengue / QC	_YRC[Carbamidomethyl (C)]HPGYKPTTDEPTTVIC[Carbamidomethyl (C)]QK_	P04003	2.22809	2.22809	3.35588e-07	7.06587e-07	72	P04003	C4BPA	C4b-binding protein alpha chain	C4BPA_HUMAN	1	368.514	4.68514	Dengue	QC	NaN	NaN	NaN	54.4352	0.370362
Dengue / QC	_LDTLAQEVALLKEQQALQTVC[Carbamidomethyl (C)]LK_	E9PHK0;P05452	0.386183	0.386183	3.36802e-07	7.08897e-07	44	E9PHK0;P05452	CLEC3B	Tetranectin	E9PHK0_HUMAN;TETN_HUMAN	1	30.6931	1.30693	Dengue	QC	NaN	NaN	NaN	31.2706	0.103502
Dengue / QC	_LLLLDLSHNSLLALEPGILDTANVEALR_	Q6EMK4	1.32172	1.32172	3.37206e-07	7.09499e-07	64	Q6EMK4	VASN	Vasorin	VASN_HUMAN	1	149.965	2.49965	Dengue	QC	NaN	NaN	NaN	26.3318	0.160612
Dengue / QC	_SGQSEDRQPVPGQQM[Oxidation (M)]TLKIEGDHGAR_	P01024	1.13742	1.13742	3.38751e-07	7.125e-07	44	P01024	C3	Complement C3	CO3_HUMAN	1	119.988	2.19988	Dengue	QC	NaN	NaN	NaN	15.5612	0.30416
Dengue / QC	_AQLYIDC[Carbamidomethyl (C)]EK_	P07996	0.627425	0.627425	3.414e-07	7.17571e-07	48	P07996	THBS1	Thrombospondin-1	TSP1_HUMAN	1	54.4805	1.5448	Dengue	QC	NaN	NaN	NaN	26.4138	0.163726
Dengue / QC	_ALTDMPQMR_	P02671	2.63218	2.63218	3.41682e-07	7.17913e-07	152	P02671	FGA	Fibrinogen alpha chain	FIBA_HUMAN	1	519.963	6.19963	Dengue	QC	NaN	NaN	NaN	125.941	0.445375
Dengue / QC	_RSDFASNC[Carbamidomethyl (C)]C[Carbamidomethyl (C)]SINSPPLYC[Carbamidomethyl (C)]DSEIDAELKNIL_	P02774;P02774-3	1.01331	1.01331	3.4615e-07	7.26541e-07	82	P02774;P02774-3	GC	Vitamin D-binding protein;Isoform 3 of Vitamin D-binding protein	VTDB_HUMAN	1	101.854	2.01854	Dengue	QC	NaN	NaN	NaN	68.6144	0.159042
Dengue / QC	_FNKPFVFLM[Oxidation (M)]IEQNTKSPLFM[Oxidation (M)]GK_	P01009	0.748198	0.748198	3.47094e-07	7.28269e-07	26	P01009	SERPINA1	Alpha-1-antitrypsin	A1AT_HUMAN	1	67.9693	1.67969	Dengue	QC	NaN	NaN	NaN	16.9702	0.198163
Dengue / QC	_ADGSPVKVGVETTKPSK_	A0M8Q6	1.39031	1.39031	3.48875e-07	7.31496e-07	68	A0M8Q6	IGLC7	Immunoglobulin lambda constant 7	IGLC7_HUMAN	1	162.136	2.62136	Dengue	QC	NaN	NaN	NaN	45.3805	0.24431
Dengue / QC	_DSHSLTTNIMEILR_	P02671	2.26324	2.26324	3.56056e-07	7.44906e-07	80	P02671	FGA	Fibrinogen alpha chain	FIBA_HUMAN	1	380.069	4.80069	Dengue	QC	NaN	NaN	NaN	58.2484	0.249192
Dengue / QC	_LNNGGSYNAWSVEK_	A0A0A0MRJ7;P12259	1.5705	1.5705	3.56136e-07	7.44906e-07	18	A0A0A0MRJ7;P12259	F5	Coagulation factor V	A0A0A0MRJ7_HUMAN;FA5_HUMAN	1	197.008	2.97008	Dengue	QC	NaN	NaN	NaN	12.4873	0.159362
Dengue / QC	_LNRVNDAQEYR_	Q9UGM5	1.40058	1.40058	3.64595e-07	7.61279e-07	38	Q9UGM5	FETUB	Fetuin-B	FETUB_HUMAN	1	164.008	2.64008	Dengue	QC	NaN	NaN	NaN	27.418	0.211447
Dengue / QC	_VQPYLDDFQKKWQEEM[Oxidation (M)]ELYR_	P02647	0.898936	0.898936	3.69301e-07	7.70304e-07	34	P02647	APOA1	Apolipoprotein A-I	APOA1_HUMAN	1	86.4691	1.86469	Dengue	QC	NaN	NaN	NaN	29.3858	0.124807
Dengue / QC	_TPSC[Carbamidomethyl (C)]GDIC[Carbamidomethyl (C)]NFPPK_	P04003	-0.3798	0.3798	3.70675e-07	7.72368e-07	174	P04003	C4BPA	C4b-binding protein alpha chain	C4BPA_HUMAN	1	-23.1456	0.768544	Dengue	QC	NaN	NaN	NaN	79.6403	0.0688435
Dengue / QC	_C[Carbamidomethyl (C)]RGQSISVTSIRPC[Carbamidomethyl (C)]AAETQ_	P10643	1.01135	1.01135	3.73493e-07	7.77791e-07	128	P10643	C7	Complement component C7	CO7_HUMAN	1	101.58	2.0158	Dengue	QC	NaN	NaN	NaN	108.751	0.158967
Dengue / QC	_QSTLVLFPGDLR_	P14780	1.14408	1.14408	3.77065e-07	7.83939e-07	72	P14780	MMP9	Matrix metalloproteinase-9	MMP9_HUMAN	1	121.005	2.21005	Dengue	QC	NaN	NaN	NaN	49.4663	0.233152
Dengue / QC	_SQWGKEFLIEK_	B4E1Z4	0.930026	0.930026	3.77139e-07	7.83939e-07	78	B4E1Z4	NaN	cDNA FLJ55673, highly similar to Complement factor B (EC 3.4.21.47)	B4E1Z4_HUMAN	1	90.5311	1.90531	Dengue	QC	NaN	NaN	NaN	39.3438	0.145783
Dengue / QC	_C[Carbamidomethyl (C)]LAFEC[Carbamidomethyl (C)]PENYRR_	P23142	0.615909	0.615909	3.7953e-07	7.88637e-07	168	P23142	FBLN1	Fibulin-1	FBLN1_HUMAN	1	53.2523	1.53252	Dengue	QC	NaN	NaN	NaN	163.072	0.118249
Dengue / QC	_LVNGQSHISLSKAEFQDALEKLNM[Oxidation (M)]GITDLQGLR_	P0C0L5	0.604069	0.604069	3.8483e-07	7.991e-07	128	P0C0L5	C4B	Complement C4-B	CO4B_HUMAN	1	51.9998	1.52	Dengue	QC	NaN	NaN	NaN	53.2404	0.130119
Dengue / QC	_C[Carbamidomethyl (C)]GPASVQAIK_	P00488	2.99017	2.99017	3.95667e-07	8.21036e-07	30	P00488	F13A1	Coagulation factor XIII A chain	F13A_HUMAN	1	694.569	7.94569	Dengue	QC	NaN	NaN	NaN	16.269	0.430277
Dengue / QC	_LLIYDASSLESGVPSR_	A0A0B4J2D9;P0DP09	-0.837323	0.837323	4.10521e-07	8.49811e-07	150	A0A0B4J2D9;P0DP09	IGKV1D-13;IGKV1-13	Immunoglobulin kappa variable 1D-13;Immunoglobulin kappa variable 1-13	KVD13_HUMAN;KV113_HUMAN	1	-44.0319	0.559681	Dengue	QC	NaN	NaN	NaN	125.251	0.156653
Dengue / QC	_NPDPVAAPYC[Carbamidomethyl (C)]YTR_	P08519	1.15099	1.15099	4.19974e-07	8.66107e-07	126	P08519	LPA	Apolipoprotein(a)	APOA_HUMAN	1	122.066	2.22066	Dengue	QC	NaN	NaN	NaN	106.268	0.179379
Dengue / QC	_SLNPNRVTFK_	P01008	0.987593	0.987593	4.22715e-07	8.70865e-07	170	P01008	SERPINC1	Antithrombin-III	ANT3_HUMAN	1	98.2874	1.98287	Dengue	QC	NaN	NaN	NaN	152.068	0.16575
Dengue / QC	_FSC[Carbamidomethyl (C)]MC[Carbamidomethyl (C)]PQGYQVVR_	Q12805;Q12805-2;Q12805-4	0.970807	0.970807	4.25956e-07	8.76643e-07	94	Q12805;Q12805-2;Q12805-4	EFEMP1	EGF-containing fibulin-like extracellular matrix protein 1;Isoform 2 of EGF-containing fibulin-like extracellular matrix protein 1;Isoform 4 of EGF-containing fibulin-like extracellular matrix protein 1	FBLN3_HUMAN	1	95.9937	1.95994	Dengue	QC	NaN	NaN	NaN	66.2274	0.163257
Dengue / QC	_FTNIGPDTM[Oxidation (M)]R_	P02751;P02751-15;P02751-3;P02751-7	1.5089	1.5089	4.29767e-07	8.83882e-07	22	P02751;P02751-15;P02751-3;P02751-7	FN1	Fibronectin;Isoform 15 of Fibronectin;Isoform 3 of Fibronectin;Isoform 7 of Fibronectin	FINC_HUMAN	1	184.593	2.84593	Dengue	QC	NaN	NaN	NaN	14.4127	0.242081
Dengue / QC	_VTGVVLFR_	P08294	0.80244	0.80244	4.347e-07	8.93722e-07	90	P08294	SOD3	Extracellular superoxide dismutase [Cu-Zn]	SODE_HUMAN	1	74.4048	1.74405	Dengue	QC	NaN	NaN	NaN	72.1464	0.165011
Dengue / QC	_M[Oxidation (M)]KYWGVASFLQK_	P02753;Q5VY30	0.980712	0.980712	4.46382e-07	9.15866e-07	126	P02753;Q5VY30	RBP4	Retinol-binding protein 4;Retinol binding protein 4, plasma, isoform CRA_b	RET4_HUMAN;Q5VY30_HUMAN	1	97.3439	1.97344	Dengue	QC	NaN	NaN	NaN	106.034	0.142727
Dengue / QC	_RPWNVASLIYETK_	P02748	-0.61556	0.61556	4.49038e-07	9.20375e-07	176	P02748	C9	Complement component C9	CO9_HUMAN	1	-34.7323	0.652677	Dengue	QC	NaN	NaN	NaN	49.9296	0.105575
Dengue / QC	_YASQSFSGVPSR_	A0A0C4DH24	-0.742864	0.742864	4.54056e-07	9.29713e-07	146	A0A0C4DH24	IGKV6-21	Immunoglobulin kappa variable 6-21	KV621_HUMAN	1	-40.2448	0.597552	Dengue	QC	NaN	NaN	NaN	98.9118	0.131135
Dengue / QC	_YVYIAELLAHK_	P27169	0.363259	0.363259	4.55471e-07	9.32291e-07	114	P27169	PON1	Serum paraoxonase/arylesterase 1	PON1_HUMAN	1	28.6329	1.28633	Dengue	QC	NaN	NaN	NaN	91.5087	0.089562
Dengue / QC	_NNQKSEPLIGR_	P02751;P02751-15;P02751-3;P02751-7	0.832011	0.832011	4.59702e-07	9.40314e-07	62	P02751;P02751-15;P02751-3;P02751-7	FN1	Fibronectin;Isoform 15 of Fibronectin;Isoform 3 of Fibronectin;Isoform 7 of Fibronectin	FINC_HUMAN	1	78.0166	1.78017	Dengue	QC	NaN	NaN	NaN	38.4282	0.21107
Dengue / QC	_C[Carbamidomethyl (C)]C[Carbamidomethyl (C)]ESASEDC[Carbamidomethyl (C)]MAKELPEHTVK_	P02774;P02774-3	1.29625	1.29625	4.65816e-07	9.5185e-07	126	P02774;P02774-3	GC	Vitamin D-binding protein;Isoform 3 of Vitamin D-binding protein	VTDB_HUMAN	1	145.59	2.4559	Dengue	QC	NaN	NaN	NaN	112.858	0.21428
Dengue / QC	_DFNIPGFPTVR_	O00391	0.569996	0.569996	4.68135e-07	9.55941e-07	66	O00391	QSOX1	Sulfhydryl oxidase 1	QSOX1_HUMAN	1	48.4519	1.48452	Dengue	QC	NaN	NaN	NaN	57.0383	0.125804
Dengue / QC	_HPDEAAFFDTASTGK_	P02671	1.71433	1.71433	4.68811e-07	9.56997e-07	156	P02671	FGA	Fibrinogen alpha chain	FIBA_HUMAN	1	228.144	3.28144	Dengue	QC	NaN	NaN	NaN	124.045	0.298985
Dengue / QC	_ASC[Carbamidomethyl (C)]KVPVK_	P02749	1.33722	1.33722	4.73619e-07	9.66157e-07	34	P02749	APOH	Beta-2-glycoprotein 1	APOH_HUMAN	1	152.663	2.52663	Dengue	QC	NaN	NaN	NaN	12.1186	0.157809
Dengue / QC	_GFYFSRPASR_	P01344;P01344-3	0.407359	0.407359	4.74712e-07	9.67811e-07	146	P01344;P01344-3	IGF2	Insulin-like growth factor II;Isoform 3 of Insulin-like growth factor II	IGF2_HUMAN	1	32.6255	1.32626	Dengue	QC	NaN	NaN	NaN	55.034	0.0922273
Dengue / QC	_IVDLVKELDRDTVFALVNYIFFK_	P01009	2.23567	2.23567	4.82365e-07	9.82336e-07	36	P01009	SERPINA1	Alpha-1-antitrypsin	A1AT_HUMAN	1	370.981	4.70981	Dengue	QC	NaN	NaN	NaN	29.6835	0.358462
Dengue / QC	_TRRVDTVDPPYPR_	P04004	1.21246	1.21246	4.846e-07	9.86221e-07	168	P04004	VTN	Vitronectin	VTNC_HUMAN	1	131.732	2.31732	Dengue	QC	NaN	NaN	NaN	156.004	0.205701
Dengue / QC	_LALDNGGLAR_	Q14624	-0.390773	0.390773	4.9499e-07	1.00533e-06	176	Q14624	ITIH4	Inter-alpha-trypsin inhibitor heavy chain H4	ITIH4_HUMAN	1	-23.7279	0.762721	Dengue	QC	NaN	NaN	NaN	64.2364	0.0666887
Dengue / QC	_GEWPWQVTLHTTSPTQR_	P03951	1.31901	1.31901	5.04504e-07	1.02258e-06	30	P03951	F11	Coagulation factor XI	FA11_HUMAN	1	149.494	2.49494	Dengue	QC	NaN	NaN	NaN	24.472	0.180114
Dengue / QC	_VVSVDENFRPR_	P20742	2.55972	2.55972	5.05124e-07	1.0235e-06	88	P20742	PZP	Pregnancy zone protein	PZP_HUMAN	1	489.595	5.89595	Dengue	QC	NaN	NaN	NaN	59.8685	0.415187
Dengue / QC	_WTPPRAQITGYR_	P02751;P02751-15;P02751-3;P02751-7	0.990518	0.990518	5.10247e-07	1.03284e-06	54	P02751;P02751-15;P02751-3;P02751-7	FN1	Fibronectin;Isoform 15 of Fibronectin;Isoform 3 of Fibronectin;Isoform 7 of Fibronectin	FINC_HUMAN	1	98.6898	1.9869	Dengue	QC	NaN	NaN	NaN	49.4167	0.208793
Dengue / QC	_LMIYEVSK_	P01709	-0.684564	0.684564	5.22252e-07	1.05607e-06	176	P01709	IGLV2-8	Immunoglobulin lambda variable 2-8	LV208_HUMAN	1	-37.7806	0.622194	Dengue	QC	NaN	NaN	NaN	98.8173	0.119544
Dengue / QC	_GHFSISIPVKSDIAPVARLLIYAVLPTGDVIGDSAK_	P01023	2.4524	2.4524	5.3294e-07	1.07552e-06	74	P01023	A2M	Alpha-2-macroglobulin	A2MG_HUMAN	1	447.327	5.47327	Dengue	QC	NaN	NaN	NaN	36.6783	0.265496
Dengue / QC	_DGHVILQLNSIPSSDFLC[Carbamidomethyl (C)]VR_	P01031	0.933788	0.933788	5.52415e-07	1.11221e-06	70	P01031	C5	Complement C5	CO5_HUMAN	1	91.0286	1.91029	Dengue	QC	NaN	NaN	NaN	33.4328	0.144125
Dengue / QC	_ALAQC[Carbamidomethyl (C)]APPPAVC[Carbamidomethyl (C)]AELVREPGC[Carbamidomethyl (C)]GC[Carbamidomethyl (C)]C[Carbamidomethyl (C)]LTC[Carbamidomethyl (C)]ALSEGQPC[Carbamidomethyl (C)]GIYTER_	A6XND0;P17936;P17936-2	0.684339	0.684339	5.58721e-07	1.12378e-06	42	A6XND0;P17936;P17936-2	IGFBP3	Insulin-like growth factor-binding protein 3;Insulin-like growth factor-binding protein 3;Isoform 2 of Insulin-like growth factor-binding protein 3	A6XND0_HUMAN;IBP3_HUMAN;IBP3_HUMAN	1	60.6966	1.60697	Dengue	QC	NaN	NaN	NaN	20.9015	0.147345
Dengue / QC	_AALGKLPQQANDYLNSFNWER_	P04114	1.1687	1.1687	5.63278e-07	1.13219e-06	48	P04114	APOB	Apolipoprotein B-100	APOB_HUMAN	1	124.809	2.24809	Dengue	QC	NaN	NaN	NaN	13.5251	0.1515
Dengue / QC	_GSRPQGPFLIADKWPALPR_	P14780	2.46069	2.46069	5.66028e-07	1.13696e-06	30	P14780	MMP9	Matrix metalloproteinase-9	MMP9_HUMAN	1	450.481	5.50481	Dengue	QC	NaN	NaN	NaN	16.9747	0.286681
Dengue / QC	_WVMVPM[Oxidation (M)]MSLHHLTIPYFR_	P01011	0.647166	0.647166	5.71698e-07	1.14797e-06	20	P01011	SERPINA3	Alpha-1-antichymotrypsin	AACT_HUMAN	1	56.6088	1.56609	Dengue	QC	NaN	NaN	NaN	10.4903	0.224505
Dengue / QC	_QGETLNFLEIGYSR_	Q16610	0.825727	0.825727	5.73603e-07	1.15104e-06	112	Q16610	ECM1	Extracellular matrix protein 1	ECM1_HUMAN	1	77.2428	1.77243	Dengue	QC	NaN	NaN	NaN	73.5616	0.170378
Dengue / QC	_C[Carbamidomethyl (C)]DPVDQC[Carbamidomethyl (C)]QDSETGTFYQIGDSWEK_	P02751;P02751-15;P02751-3;P02751-7	0.81574	0.81574	5.77123e-07	1.15688e-06	120	P02751;P02751-15;P02751-3;P02751-7	FN1	Fibronectin;Isoform 15 of Fibronectin;Isoform 3 of Fibronectin;Isoform 7 of Fibronectin	FINC_HUMAN	1	76.02	1.7602	Dengue	QC	NaN	NaN	NaN	111.545	0.14108
Dengue / QC	_TPEVTC[Carbamidomethyl (C)]VVVDVSQEDPEVQFNWYVDGVEVHNAK_	P01861	1.19601	1.19601	5.79759e-07	1.16144e-06	18	P01861	IGHG4	Immunoglobulin heavy constant gamma 4	IGHG4_HUMAN	1	129.105	2.29105	Dengue	QC	NaN	NaN	NaN	11.1806	0.234977
Dengue / QC	_SVGSQWASPENPC[Carbamidomethyl (C)]LINEC[Carbamidomethyl (C)]VR_	P04275	0.76851	0.76851	5.88332e-07	1.17705e-06	108	P04275	VWF	von Willebrand factor	VWF_HUMAN	1	70.3509	1.70351	Dengue	QC	NaN	NaN	NaN	96.4247	0.122052
Dengue / QC	_NTLYLQMGSLR_	A0A075B6Q5	-0.756606	0.756606	5.94422e-07	1.18806e-06	100	A0A075B6Q5	IGHV3-64	Immunoglobulin heavy variable 3-64	HV364_HUMAN	1	-40.8113	0.591887	Dengue	QC	NaN	NaN	NaN	67.0239	0.121503
Dengue / QC	_FSGSNSGNTATLTISR_	A0A075B6K5	-0.654376	0.654376	5.95719e-07	1.19025e-06	176	A0A075B6K5	IGLV3-9	Immunoglobulin lambda variable 3-9	LV39_HUMAN	1	-36.465	0.63535	Dengue	QC	NaN	NaN	NaN	66.9815	0.111886
Dengue / QC	_EPAAQAPVK_	A0A0A0MS09;P01880;P01880-2	2.0118	2.0118	5.99764e-07	1.19714e-06	26	A0A0A0MS09;P01880;P01880-2	IGHD	Immunoglobulin heavy constant delta (Fragment);Immunoglobulin heavy constant delta;Isoform 2 of Immunoglobulin heavy constant delta	A0A0A0MS09_HUMAN;IGHD_HUMAN;IGHD_HUMAN	1	303.286	4.03286	Dengue	QC	NaN	NaN	NaN	14.8232	0.278168
Dengue / QC	_ELPQSIVYK_	Q12805;Q12805-2;Q12805-4	0.923837	0.923837	6.02741e-07	1.20269e-06	96	Q12805;Q12805-2;Q12805-4	EFEMP1	EGF-containing fibulin-like extracellular matrix protein 1;Isoform 2 of EGF-containing fibulin-like extracellular matrix protein 1;Isoform 4 of EGF-containing fibulin-like extracellular matrix protein 1	FBLN3_HUMAN	1	89.7155	1.89715	Dengue	QC	NaN	NaN	NaN	90.524	0.181396
Dengue / QC	_VFGPGTK_	A0A0C4DH63	3.07689	3.07689	6.06904e-07	1.21019e-06	50	A0A0C4DH63	TRGJP	T-cell receptor gamma joining P (Fragment)	A0A0C4DH63_HUMAN	1	743.794	8.43794	Dengue	QC	NaN	NaN	NaN	24.2241	0.300968
Dengue / QC	_FDSDAASQR_	P05534;P30447	2.38645	2.38645	6.10187e-07	1.21634e-06	22	P05534;P30447	HLA-A	HLA class I histocompatibility antigen, A-24 alpha chain;HLA class I histocompatibility antigen, A-23 alpha chain	1A24_HUMAN;1A23_HUMAN	1	422.87	5.2287	Dengue	QC	NaN	NaN	NaN	10.892	0.219125
Dengue / QC	_QGYDLSPLTPLSELSVQC[Carbamidomethyl (C)]NR_	P05160	0.80344	0.80344	6.13191e-07	1.22071e-06	102	P05160	F13B	Coagulation factor XIII B chain	F13B_HUMAN	1	74.5258	1.74526	Dengue	QC	NaN	NaN	NaN	30.7414	0.132409
Dengue / QC	_ANRPFLVFIREVPLNTIIFMGR_	P01008	1.01911	1.01911	6.14807e-07	1.22312e-06	172	P01008	SERPINC1	Antithrombin-III	ANT3_HUMAN	1	102.667	2.02667	Dengue	QC	NaN	NaN	NaN	57.2018	0.134454
Dengue / QC	_LSEGASYLDHTFPAEKMDDAVAPGR_	A0A0A0MRJ7;P12259	0.503829	0.503829	6.14765e-07	1.22312e-06	14	A0A0A0MRJ7;P12259	F5	Coagulation factor V	A0A0A0MRJ7_HUMAN;FA5_HUMAN	1	41.7972	1.41797	Dengue	QC	NaN	NaN	NaN	5.88722	0.330473
Dengue / QC	_EQDLEVILHNGAC[Carbamidomethyl (C)]SPGAR_	P04275	0.984138	0.984138	6.25712e-07	1.24235e-06	38	P04275	VWF	von Willebrand factor	VWF_HUMAN	1	97.8131	1.97813	Dengue	QC	NaN	NaN	NaN	28.8217	0.147318
Dengue / QC	_DNAKNSLYLQM[Oxidation (M)]NSLRAEDTAVYYC[Carbamidomethyl (C)]AR_	P01762	1.37618	1.37618	6.40118e-07	1.27012e-06	118	P01762	IGHV3-11	Immunoglobulin heavy variable 3-11	HV311_HUMAN	1	159.58	2.5958	Dengue	QC	NaN	NaN	NaN	54.3605	0.712356
Dengue / QC	_TVTAMDVVYALKR_	P62805	2.23981	2.23981	6.44529e-07	1.27845e-06	16	P62805	HIST1H4A	Histone H4	H4_HUMAN	1	372.334	4.72334	Dengue	QC	NaN	NaN	NaN	9.35775	0.43075
Dengue / QC	_VSNGAGTM[Oxidation (M)]SVSLVADENPFAQGALK_	P06396	0.846737	0.846737	6.46164e-07	1.28085e-06	20	P06396	GSN	Gelsolin	GELS_HUMAN	1	79.8429	1.79843	Dengue	QC	NaN	NaN	NaN	7.39482	0.351441
Dengue / QC	_PLVEEPQNLIK_	P02768	-0.397256	0.397256	6.51931e-07	1.29058e-06	162	P02768	ALB	Serum albumin	ALBU_HUMAN	1	-24.0699	0.759301	Dengue	QC	NaN	NaN	NaN	94.1577	0.064716
Dengue / QC	_GVPIPNKVIFIR_	P01023	-0.484097	0.484097	6.57734e-07	1.30079e-06	176	P01023	A2M	Alpha-2-macroglobulin	A2MG_HUMAN	1	-28.5056	0.714944	Dengue	QC	NaN	NaN	NaN	114.557	0.078838
Dengue / QC	_VTVSC[Carbamidomethyl (C)]SGGMSLEGPSAFLC[Carbamidomethyl (C)]GSSLK_	P10643	0.549804	0.549804	6.64165e-07	1.31265e-06	142	P10643	C7	Complement component C7	CO7_HUMAN	1	46.3887	1.46389	Dengue	QC	NaN	NaN	NaN	123.191	0.115613
Dengue / QC	_TMSGLEC[Carbamidomethyl (C)]QAWDSQSPHAHGYIPSK_	P00747	0.266416	0.266416	6.87382e-07	1.35453e-06	84	P00747	PLG	Plasminogen	PLMN_HUMAN	1	20.2816	1.20282	Dengue	QC	NaN	NaN	NaN	61.6542	0.0709833
Dengue / QC	_KKTDELPQLVTLPHPNLHGPEILDVPSTVQK_	P02751;P02751-15;P02751-3;P02751-7	0.456611	0.456611	6.87829e-07	1.35456e-06	152	P02751;P02751-15;P02751-3;P02751-7	FN1	Fibronectin;Isoform 15 of Fibronectin;Isoform 3 of Fibronectin;Isoform 7 of Fibronectin	FINC_HUMAN	1	37.2314	1.37231	Dengue	QC	NaN	NaN	NaN	104.545	0.0837315
Dengue / QC	_YFKPGM[Oxidation (M)]PFDLM[Oxidation (M)]VFVTNPDGSPAYR_	P01024	0.389517	0.389517	7.00601e-07	1.37687e-06	56	P01024	C3	Complement C3	CO3_HUMAN	1	30.9954	1.30995	Dengue	QC	NaN	NaN	NaN	14.7026	0.278172
Dengue / QC	_KQLGAGSIEEC[Carbamidomethyl (C)]AAKC[Carbamidomethyl (C)]EEDEEFTC[Carbamidomethyl (C)]R_	P00747	0.533755	0.533755	7.05942e-07	1.38612e-06	160	P00747	PLG	Plasminogen	PLMN_HUMAN	1	44.7693	1.44769	Dengue	QC	NaN	NaN	NaN	138.486	0.100395
Dengue / QC	_LC[Carbamidomethyl (C)]NSPSPQMNGKPC[Carbamidomethyl (C)]EGEAR_	P07996	0.854526	0.854526	7.09572e-07	1.39189e-06	56	P07996	THBS1	Thrombospondin-1	TSP1_HUMAN	1	80.8164	1.80816	Dengue	QC	NaN	NaN	NaN	21.2686	0.109416
Dengue / QC	_TLPEC[Carbamidomethyl (C)]SK_	P43652	0.622446	0.622446	7.44564e-07	1.45673e-06	100	P43652	AFM	Afamin	AFAM_HUMAN	1	53.9483	1.53948	Dengue	QC	NaN	NaN	NaN	94.6415	0.115396
Dengue / QC	_LGPNYLHIPVNC[Carbamidomethyl (C)]PYR_	P04040	1.2694	1.2694	7.45704e-07	1.45849e-06	62	P04040	CAT	Catalase	CATA_HUMAN	1	141.062	2.41062	Dengue	QC	NaN	NaN	NaN	34.2644	0.192578
Dengue / QC	_SGLSTGWTQLSK_	P04217	-0.42631	0.42631	7.56226e-07	1.4762e-06	176	P04217	A1BG	Alpha-1B-glycoprotein	A1BG_HUMAN	1	-25.5838	0.744162	Dengue	QC	NaN	NaN	NaN	50.9042	0.07352
Dengue / QC	_NKPGVYTDVAYYLAWIR_	P00748	1.19841	1.19841	7.70932e-07	1.50295e-06	56	P00748	F12	Coagulation factor XII	FA12_HUMAN	1	129.487	2.29487	Dengue	QC	NaN	NaN	NaN	36.8681	0.217568
Dengue / QC	_AHLDIAGSLEGHLR_	P04114	0.581988	0.581988	7.71678e-07	1.50392e-06	68	P04114	APOB	Apolipoprotein B-100	APOB_HUMAN	1	49.691	1.49691	Dengue	QC	NaN	NaN	NaN	63.0986	0.124422
Dengue / QC	_TQILVGVNKDEGTAFLVYGAPGFSK_	F8WF14;P06276	0.95332	0.95332	7.87261e-07	1.53231e-06	40	F8WF14;P06276	BCHE	Carboxylic ester hydrolase;Cholinesterase	F8WF14_HUMAN;CHLE_HUMAN	1	93.6324	1.93632	Dengue	QC	NaN	NaN	NaN	21.8801	0.218437
Dengue / QC	_KALQTEMAR_	P11226	1.31798	1.31798	7.96116e-07	1.54905e-06	34	P11226	MBL2	Mannose-binding protein C	MBL2_HUMAN	1	149.317	2.49317	Dengue	QC	NaN	NaN	NaN	23.2455	0.193437
Dengue / QC	_FSGSGAGTDFTLK_	A0A0C4DH68	-0.514526	0.514526	8.14134e-07	1.58053e-06	172	A0A0C4DH68	IGKV2-24	Immunoglobulin kappa variable 2-24	KV224_HUMAN	1	-29.9977	0.700023	Dengue	QC	NaN	NaN	NaN	85.3978	0.0820355
Dengue / QC	_S[Acetyl (Protein N-term)]ETAPAETATPAPVEK_	P16401	1.80372	1.80372	8.18222e-07	1.58693e-06	18	P16401	HIST1H1B	Histone H1.5	H15_HUMAN	1	249.12	3.4912	Dengue	QC	NaN	NaN	NaN	8.36619	0.556218
Dengue / QC	_LRC[Carbamidomethyl (C)]NGDNDC[Carbamidomethyl (C)]GDFSDEDDC[Carbamidomethyl (C)]ESEPRPPC[Carbamidomethyl (C)]R_	P02748	0.774088	0.774088	8.19658e-07	1.58819e-06	124	P02748	C9	Complement component C9	CO9_HUMAN	1	71.0109	1.71011	Dengue	QC	NaN	NaN	NaN	68.8133	0.117842
Dengue / QC	_FSMPSPVR_	A0A0C4DFP6;Q9NQ79;Q9NQ79-2	0.758361	0.758361	8.34538e-07	1.61494e-06	62	A0A0C4DFP6;Q9NQ79;Q9NQ79-2	CRTAC1	Cartilage acidic protein 1;Cartilage acidic protein 1;Isoform 2 of Cartilage acidic protein 1	A0A0C4DFP6_HUMAN;CRAC1_HUMAN;CRAC1_HUMAN	1	69.1567	1.69157	Dengue	QC	NaN	NaN	NaN	28.7034	0.226262
Dengue / QC	_RLGVYELLLK_	Q14624	0.728451	0.728451	8.35418e-07	1.61561e-06	18	Q14624	ITIH4	Inter-alpha-trypsin inhibitor heavy chain H4	ITIH4_HUMAN	1	65.686	1.65686	Dengue	QC	NaN	NaN	NaN	13.0115	0.10776
Dengue / QC	_LIQGAPTIR_	P18065	0.960526	0.960526	8.35288e-07	1.61561e-06	64	P18065	IGFBP2	Insulin-like growth factor-binding protein 2	IBP2_HUMAN	1	94.6019	1.94602	Dengue	QC	NaN	NaN	NaN	53.7608	0.202239
Dengue / QC	_LKMLEVPYVDR_	P00742	0.998626	0.998626	8.37474e-07	1.61906e-06	60	P00742	F10	Coagulation factor X	FA10_HUMAN	1	99.8096	1.9981	Dengue	QC	NaN	NaN	NaN	46.5593	0.153566
Dengue / QC	_GWVTDGFSSLKDYWSTVK_	B0YIW2;P02656	2.12485	2.12485	8.39475e-07	1.62241e-06	24	B0YIW2;P02656	APOC3	Apolipoprotein C-III	B0YIW2_HUMAN;APOC3_HUMAN	1	336.159	4.36159	Dengue	QC	NaN	NaN	NaN	15.3366	0.23723
Dengue / QC	_ILDDLSPR_	Q14624	-0.483194	0.483194	8.40549e-07	1.62397e-06	172	Q14624	ITIH4	Inter-alpha-trypsin inhibitor heavy chain H4	ITIH4_HUMAN	1	-28.4608	0.715392	Dengue	QC	NaN	NaN	NaN	56.2142	0.0889962
Dengue / QC	_FFSLLSGSLNSHGLELNADILGTDKINSGAHK_	P04114	0.568611	0.568611	8.45808e-07	1.63255e-06	86	P04114	APOB	Apolipoprotein B-100	APOB_HUMAN	1	48.3095	1.48309	Dengue	QC	NaN	NaN	NaN	57.3543	0.134865
Dengue / QC	_FSC[Carbamidomethyl (C)]FQEEAPQPHYQLR_	Q16610	0.975432	0.975432	8.51942e-07	1.64177e-06	164	Q16610	ECM1	Extracellular matrix protein 1	ECM1_HUMAN	1	96.623	1.96623	Dengue	QC	NaN	NaN	NaN	146.684	0.155013
Dengue / QC	_WC[Carbamidomethyl (C)]AVSEHEATKC[Carbamidomethyl (C)]QSFR_	P02787	1.79924	1.79924	8.55912e-07	1.64889e-06	126	P02787	TF	Serotransferrin	TRFE_HUMAN	1	248.037	3.48037	Dengue	QC	NaN	NaN	NaN	105.992	0.312429
Dengue / QC	_ARANLQSVPHASASRPR_	O14791;O14791-2	1.02764	1.02764	8.60476e-07	1.65662e-06	48	O14791;O14791-2	APOL1	Apolipoprotein L1;Isoform 2 of Apolipoprotein L1	APOL1_HUMAN	1	103.868	2.03868	Dengue	QC	NaN	NaN	NaN	41.078	0.15742
Dengue / QC	_TFYSC[Carbamidomethyl (C)]TTEGR_	P02751;P02751-15;P02751-3;P02751-7	0.607184	0.607184	8.75935e-07	1.68531e-06	174	P02751;P02751-15;P02751-3;P02751-7	FN1	Fibronectin;Isoform 15 of Fibronectin;Isoform 3 of Fibronectin;Isoform 7 of Fibronectin	FINC_HUMAN	1	52.3283	1.52328	Dengue	QC	NaN	NaN	NaN	116.678	0.113206
Dengue / QC	_MNVAPAC[Carbamidomethyl (C)]LPERDWAESTLMTQK_	P00742	0.453836	0.453836	8.87425e-07	1.70524e-06	150	P00742	F10	Coagulation factor X	FA10_HUMAN	1	36.9677	1.36968	Dengue	QC	NaN	NaN	NaN	101.911	0.0755102
Dengue / QC	_IAYKNWETEITAQPDGGKTENC[Carbamidomethyl (C)]AVLSGAANGK_	E9PHK0;P05452	0.871473	0.871473	8.91319e-07	1.71217e-06	94	E9PHK0;P05452	CLEC3B	Tetranectin	E9PHK0_HUMAN;TETN_HUMAN	1	82.953	1.82953	Dengue	QC	NaN	NaN	NaN	65.3364	0.130626
Dengue / QC	_YQC[Carbamidomethyl (C)]KNYYK_	P00738	4.0399	4.0399	8.95045e-07	1.71878e-06	56	P00738	HP	Haptoglobin	HPT_HUMAN	1	1544.87	16.4487	Dengue	QC	NaN	NaN	NaN	43.1922	0.532809
Dengue / QC	_GHMLENHVERLWAYLTIQELLAKR_	P19827	0.599017	0.599017	8.96522e-07	1.72107e-06	166	P19827	ITIH1	Inter-alpha-trypsin inhibitor heavy chain H1	ITIH1_HUMAN	1	51.4684	1.51468	Dengue	QC	NaN	NaN	NaN	132.147	0.119707
Dengue / QC	_TSNFNAAISLK_	P02748	-0.420302	0.420302	9.15245e-07	1.75163e-06	174	P02748	C9	Complement component C9	CO9_HUMAN	1	-25.2732	0.747268	Dengue	QC	NaN	NaN	NaN	83.0309	0.0783577
Dengue / QC	_DGAGDVAFVK_	P02787	-0.349986	0.349986	9.40793e-07	1.79633e-06	176	P02787	TF	Serotransferrin	TRFE_HUMAN	1	-21.5408	0.784592	Dengue	QC	NaN	NaN	NaN	64.5846	0.0667452
Dengue / QC	_ILDELLQTC[Carbamidomethyl (C)]VDPEDC[Carbamidomethyl (C)]PVC[Carbamidomethyl (C)]EVAGR_	P04275	2.0986	2.0986	9.79652e-07	1.86698e-06	40	P04275	VWF	von Willebrand factor	VWF_HUMAN	1	328.294	4.28294	Dengue	QC	NaN	NaN	NaN	26.9043	0.280225
Dengue / QC	_GATTSPGVYELSSR_	Q9Y6R7	0.830761	0.830761	9.84964e-07	1.87591e-06	158	Q9Y6R7	FCGBP	IgGFc-binding protein	FCGBP_HUMAN	1	77.8623	1.77862	Dengue	QC	NaN	NaN	NaN	133.937	0.151065
Dengue / QC	_VEGTAFVIFGIQDGEQR_	P01024	0.601146	0.601146	9.98289e-07	1.89769e-06	116	P01024	C3	Complement C3	CO3_HUMAN	1	51.6921	1.51692	Dengue	QC	NaN	NaN	NaN	78.9956	0.112626
Dengue / QC	_LYHSEAFTVNFGDTEEAKK_	P01009	-0.505479	0.505479	1.00097e-06	1.9022e-06	158	P01009	SERPINA1	Alpha-1-antitrypsin	A1AT_HUMAN	1	-29.5574	0.704426	Dengue	QC	NaN	NaN	NaN	56.4341	0.0984622
Dengue / QC	_LGPHAGDVEGHLSFLEK_	P06727	2.31667	2.31667	1.00789e-06	1.91473e-06	20	P06727	APOA4	Apolipoprotein A-IV	APOA4_HUMAN	1	398.181	4.98181	Dengue	QC	NaN	NaN	NaN	14.3882	0.274358
Dengue / QC	_RPC[Carbamidomethyl (C)]FSALEVDETYVPKEFNAETFTFHADIC[Carbamidomethyl (C)]TLSEK_	P02768	0.500515	0.500515	1.02084e-06	1.9363e-06	174	P02768	ALB	Serum albumin	ALBU_HUMAN	1	41.4719	1.41472	Dengue	QC	NaN	NaN	NaN	83.1754	0.105836
Dengue / QC	_NPDNDIRPWC[Carbamidomethyl (C)]FVLNRDR_	P00748	1.13245	1.13245	1.02585e-06	1.94518e-06	40	P00748	F12	Coagulation factor XII	FA12_HUMAN	1	119.23	2.1923	Dengue	QC	NaN	NaN	NaN	31.3869	0.177955
Dengue / QC	_NYC[Carbamidomethyl (C)]RNPDGDVGGPWC[Carbamidomethyl (C)]YTTNPR_	P00747	0.961789	0.961789	1.03008e-06	1.95196e-06	144	P00747	PLG	Plasminogen	PLMN_HUMAN	1	94.7724	1.94772	Dengue	QC	NaN	NaN	NaN	130.261	0.171771
Dengue / QC	_DSPIQC[Carbamidomethyl (C)]IQAIAENR_	E7ER44;P02788	1.59777	1.59777	1.0353e-06	1.96124e-06	44	E7ER44;P02788	LTF	Lactotransferrin	E7ER44_HUMAN;TRFL_HUMAN	1	202.676	3.02676	Dengue	QC	NaN	NaN	NaN	33.5091	0.25482
Dengue / QC	_DTSTSTVYM[Oxidation (M)]ELSSLR_	P01743	1.33369	1.33369	1.04696e-06	1.98272e-06	50	P01743	IGHV1-46	Immunoglobulin heavy variable 1-46	HV146_HUMAN	1	152.046	2.52046	Dengue	QC	NaN	NaN	NaN	31.1557	0.30478
Dengue / QC	_NIILEEGKEILVGDVGQTVDDPYATFVK_	P23528	1.7734	1.7734	1.07641e-06	2.03528e-06	26	P23528	CFL1	Cofilin-1	COF1_HUMAN	1	241.859	3.41859	Dengue	QC	NaN	NaN	NaN	18.1381	0.196913
Dengue / QC	_QLPGGQNPVSYVYLEVVSK_	P01031	0.563927	0.563927	1.07981e-06	2.04107e-06	146	P01031	C5	Complement C5	CO5_HUMAN	1	47.8287	1.47829	Dengue	QC	NaN	NaN	NaN	83.283	0.106509
Dengue / QC	_NMATRPYSIHAHGVQTESSTVTPTLPGETLTYVWK_	P00450	-0.58131	0.58131	1.08211e-06	2.04477e-06	164	P00450	CP	Ceruloplasmin	CERU_HUMAN	1	-33.1644	0.668356	Dengue	QC	NaN	NaN	NaN	61.323	0.0968538
Dengue / QC	_NKPGVYTDVAYYLAWIREHTVS_	P00748	1.23929	1.23929	1.10257e-06	2.08148e-06	98	P00748	F12	Coagulation factor XII	FA12_HUMAN	1	136.082	2.36082	Dengue	QC	NaN	NaN	NaN	76.7874	0.226815
Dengue / QC	_GLEWVGR_	A0A0B4J1Y9	-0.366743	0.366743	1.10646e-06	2.08751e-06	174	A0A0B4J1Y9	IGHV3-72	Immunoglobulin heavy variable 3-72	HV372_HUMAN	1	-22.4469	0.775531	Dengue	QC	NaN	NaN	NaN	74.0578	0.0725227
Dengue / QC	_SNLC[Carbamidomethyl (C)]ALC[Carbamidomethyl (C)]IGDEQGENKC[Carbamidomethyl (C)]VPNSNER_	E7ER44;P02788	1.86054	1.86054	1.10736e-06	2.08856e-06	24	E7ER44;P02788	LTF	Lactotransferrin	E7ER44_HUMAN;TRFL_HUMAN	1	263.143	3.63143	Dengue	QC	NaN	NaN	NaN	15.9203	0.291183
Dengue / QC	_A[Acetyl (Protein N-term)]GLNSLEAVKR_	P67936	0.503532	0.503532	1.12645e-06	2.12124e-06	52	P67936	TPM4	Tropomyosin alpha-4 chain	TPM4_HUMAN	1	41.768	1.41768	Dengue	QC	NaN	NaN	NaN	44.5216	0.120129
Dengue / QC	_EVEGQILGTYVC[Carbamidomethyl (C)]IK_	P20851;P20851-2	0.622811	0.622811	1.13163e-06	2.13033e-06	160	P20851;P20851-2	C4BPB	C4b-binding protein beta chain;Isoform 2 of C4b-binding protein beta chain	C4BPB_HUMAN	1	53.9872	1.53987	Dengue	QC	NaN	NaN	NaN	112.15	0.111699
Dengue / QC	_SSFQVTTC[Carbamidomethyl (C)]K_	P03950	1.04233	1.04233	1.13784e-06	2.14068e-06	78	P03950	ANG	Angiogenin	ANGI_HUMAN	1	105.955	2.05955	Dengue	QC	NaN	NaN	NaN	69.8116	0.148413
Dengue / QC	_SALVLQYLRVPLVDR_	P00740	1.70083	1.70083	1.14952e-06	2.15997e-06	38	P00740	F9	Coagulation factor IX	FA9_HUMAN	1	225.088	3.25088	Dengue	QC	NaN	NaN	NaN	26.7749	0.14784
Dengue / QC	_C[Carbamidomethyl (C)]AFSSQEPYFSYSGAFK_	E7ER44;P02788	0.992833	0.992833	1.16707e-06	2.19226e-06	32	E7ER44;P02788	LTF	Lactotransferrin	E7ER44_HUMAN;TRFL_HUMAN	1	99.009	1.99009	Dengue	QC	NaN	NaN	NaN	27.0192	0.1684
Dengue / QC	_VVVQTESGGR_	P20742	3.33087	3.33087	1.19736e-06	2.24217e-06	68	P20742	PZP	Pregnancy zone protein	PZP_HUMAN	1	906.216	10.0622	Dengue	QC	NaN	NaN	NaN	30.5591	0.457269
Dengue / QC	_VIQTAFQR_	P11597;P11597-2	0.763321	0.763321	1.20338e-06	2.25274e-06	48	P11597;P11597-2	CETP	Cholesteryl ester transfer protein;Isoform 2 of Cholesteryl ester transfer protein	CETP_HUMAN	1	69.7393	1.69739	Dengue	QC	NaN	NaN	NaN	36.0432	0.111857
Dengue / QC	_EAVM[Oxidation (M)]DINKPGPLFKPENGLLETK_	P07225	0.308259	0.308259	1.22638e-06	2.29366e-06	14	P07225	PROS1	Vitamin K-dependent protein S	PROS_HUMAN	1	23.8212	1.23821	Dengue	QC	NaN	NaN	NaN	5.47279	0.104187
Dengue / QC	_VPQVSTPTLVEVSRNLGKVGSK_	P02768	2.27466	2.27466	1.23001e-06	2.29973e-06	50	P02768	ALB	Serum albumin	ALBU_HUMAN	1	383.885	4.83885	Dengue	QC	NaN	NaN	NaN	26.1729	0.288259
Dengue / QC	_TLSLPELEQQQEQQQEQQQEQVQMLAPLES_	P06727	0.50283	0.50283	1.23324e-06	2.30506e-06	118	P06727	APOA4	Apolipoprotein A-IV	APOA4_HUMAN	1	41.6991	1.41699	Dengue	QC	NaN	NaN	NaN	109.411	0.0937146
Dengue / QC	_EPQVYTLPPSRDELTKNQVSLTC[Carbamidomethyl (C)]LVK_	P01857	1.07315	1.07315	1.23456e-06	2.30609e-06	128	P01857	IGHG1	Immunoglobulin heavy constant gamma 1	IGHG1_HUMAN	1	110.402	2.10402	Dengue	QC	NaN	NaN	NaN	122.458	0.221178
Dengue / QC	_FPEVDVLTK_	P04114	-0.516461	0.516461	1.23934e-06	2.3123e-06	172	P04114	APOB	Apolipoprotein B-100	APOB_HUMAN	1	-30.0915	0.699085	Dengue	QC	NaN	NaN	NaN	58.8291	0.08888
Dengue / QC	_GKFC[Carbamidomethyl (C)]EIGSDDC[Carbamidomethyl (C)]YVGDGYSYR_	Q14520;Q14520-2	0.864971	0.864971	1.24597e-06	2.32368e-06	80	Q14520;Q14520-2	HABP2	Hyaluronan-binding protein 2;Isoform 2 of Hyaluronan-binding protein 2	HABP2_HUMAN	1	82.1303	1.8213	Dengue	QC	NaN	NaN	NaN	67.5569	0.149895
Dengue / QC	_FLMKGPNK_	P08603	1.34163	1.34163	1.25467e-06	2.33786e-06	78	P08603	CFH	Complement factor H	CFAH_HUMAN	1	153.438	2.53438	Dengue	QC	NaN	NaN	NaN	52.2877	0.225462
Dengue / QC	_NWGLSVYADKPETTKEQLGEFYEALDC[Carbamidomethyl (C)]LR_	P02763	1.67028	1.67028	1.25447e-06	2.33786e-06	132	P02763	ORM1	Alpha-1-acid glycoprotein 1	A1AG1_HUMAN	1	218.275	3.18275	Dengue	QC	NaN	NaN	NaN	87.8051	0.21092
Dengue / QC	_YILQGVTSWGLGC[Carbamidomethyl (C)]ARPNKPGVYVR_	P00747	0.552292	0.552292	1.25656e-06	2.34065e-06	54	P00747	PLG	Plasminogen	PLMN_HUMAN	1	46.6414	1.46641	Dengue	QC	NaN	NaN	NaN	38.3831	0.0835713
Dengue / QC	_EALQGVGDM[Oxidation (M)]GR_	A0A096LPE2	0.417378	0.417378	1.26187e-06	2.3491e-06	92	A0A096LPE2	SAA2-SAA4	SAA2-SAA4 readthrough	A0A096LPE2_HUMAN	1	33.5498	1.3355	Dengue	QC	NaN	NaN	NaN	51.0094	0.10873
Dengue / QC	_YDSTC[Carbamidomethyl (C)]ER_	P07357	0.809846	0.809846	1.26982e-06	2.36244e-06	120	P07357	C8A	Complement component C8 alpha chain	CO8A_HUMAN	1	75.3024	1.75302	Dengue	QC	NaN	NaN	NaN	41.54	0.138077
Dengue / QC	_SLKYNPVVIDFEMQPIHEVLR_	P07357	0.663836	0.663836	1.29141e-06	2.40038e-06	144	P07357	C8A	Complement component C8 alpha chain	CO8A_HUMAN	1	58.429	1.58429	Dengue	QC	NaN	NaN	NaN	118.171	0.143809
Dengue / QC	_YISKYELDK_	P01024	-0.328185	0.328185	1.31887e-06	2.44991e-06	166	P01024	C3	Complement C3	CO3_HUMAN	1	-20.3462	0.796538	Dengue	QC	NaN	NaN	NaN	105.5	0.0764127
Dengue / QC	_TPFDYC[Carbamidomethyl (C)]ALRR_	G3XAK1;P26927	0.995185	0.995185	1.32224e-06	2.45542e-06	112	G3XAK1;P26927	MST1	Hepatocyte growth factor-like protein	G3XAK1_HUMAN;HGFL_HUMAN	1	99.3336	1.99334	Dengue	QC	NaN	NaN	NaN	96.1247	0.158572
Dengue / QC	_NSITLTNLTPGTEYVVSIVALNGREESPLLIGQQSTVSDVPR_	P02751;P02751-15;P02751-3;P02751-7	0.645724	0.645724	1.32372e-06	2.4574e-06	60	P02751;P02751-15;P02751-3;P02751-7	FN1	Fibronectin;Isoform 15 of Fibronectin;Isoform 3 of Fibronectin;Isoform 7 of Fibronectin	FINC_HUMAN	1	56.4525	1.56452	Dengue	QC	NaN	NaN	NaN	23.1149	0.16327
Dengue / QC	_ASGYTFTGYYMHWVR_	P23083	0.950122	0.950122	1.34553e-06	2.49406e-06	58	P23083	IGHV1-2	Immunoglobulin heavy variable 1-2	HV102_HUMAN	1	93.2037	1.93204	Dengue	QC	NaN	NaN	NaN	46.9284	0.226076
Dengue / QC	_HLIVTPSGC[Carbamidomethyl (C)]GEQNMIGM[Oxidation (M)]TPTVIAVHYLDETEQWEK_	P01024	0.766457	0.766457	1.35283e-06	2.50604e-06	42	P01024	C3	Complement C3	CO3_HUMAN	1	70.1087	1.70109	Dengue	QC	NaN	NaN	NaN	26.0815	0.138662
Dengue / QC	_LTYTNWNEGEPNNAGSDEDC[Carbamidomethyl (C)]VLLLK_	P11226	1.40007	1.40007	1.3809e-06	2.55412e-06	54	P11226	MBL2	Mannose-binding protein C	MBL2_HUMAN	1	163.915	2.63915	Dengue	QC	NaN	NaN	NaN	14.4953	0.145922
Dengue / QC	_SFVHLEPMSHELPC[Carbamidomethyl (C)]GHTQTVQAHYILNGGTLLGLK_	P01023	0.573612	0.573612	1.38275e-06	2.55597e-06	154	P01023	A2M	Alpha-2-macroglobulin	A2MG_HUMAN	1	48.8245	1.48824	Dengue	QC	NaN	NaN	NaN	149.578	0.105526
Dengue / QC	_GLEWMGR_	A0A0J9YXX1	0.402945	0.402945	1.38322e-06	2.55605e-06	168	A0A0J9YXX1	IGHV5-10-1	Immunoglobulin heavy variable 5-10-1	HV5X1_HUMAN	1	32.2204	1.3222	Dengue	QC	NaN	NaN	NaN	152.52	0.0877611
Dengue / QC	_KITEVALMGHLSC[Carbamidomethyl (C)]DTKEER_	P04114	0.660916	0.660916	1.42476e-06	2.63119e-06	64	P04114	APOB	Apolipoprotein B-100	APOB_HUMAN	1	58.1086	1.58109	Dengue	QC	NaN	NaN	NaN	59.0513	0.111403
Dengue / QC	_LYIEYGIQR_	Q9NPH3-5	0.582059	0.582059	1.43404e-06	2.64752e-06	60	Q9NPH3-5	IL1RAP	Isoform 4 of Interleukin-1 receptor accessory protein	IL1AP_HUMAN	1	49.6985	1.49698	Dengue	QC	NaN	NaN	NaN	32.5826	0.130143
Dengue / QC	_TAFISDFAVTADGNAFIGDIKDKVTAWK_	P19827	0.665216	0.665216	1.44009e-06	2.65788e-06	110	P19827	ITIH1	Inter-alpha-trypsin inhibitor heavy chain H1	ITIH1_HUMAN	1	58.5806	1.58581	Dengue	QC	NaN	NaN	NaN	57.1312	0.107471
Dengue / QC	_ILGGHLDAKGSFPWQAK_	P00738	1.50255	1.50255	1.44507e-06	2.66625e-06	144	P00738	HP	Haptoglobin	HPT_HUMAN	1	183.342	2.83342	Dengue	QC	NaN	NaN	NaN	114.124	0.258014
Dengue / QC	_AYYENSPQQVFSTEFEVKEYVLPSFEVIVEPTEK_	P01024	1.14054	1.14054	1.46678e-06	2.70301e-06	56	P01024	C3	Complement C3	CO3_HUMAN	1	120.464	2.20464	Dengue	QC	NaN	NaN	NaN	8.20835	0.0990128
Dengue / QC	_GDSGGPLVC[Carbamidomethyl (C)]K_	H0YAC1;P03952	0.66461	0.66461	1.46917e-06	2.70657e-06	18	H0YAC1;P03952	KLKB1	Plasma kallikrein (Fragment);Plasma kallikrein	H0YAC1_HUMAN;KLKB1_HUMAN	1	58.514	1.58514	Dengue	QC	NaN	NaN	NaN	11.0535	0.111112
Dengue / QC	_IEEADC[Carbamidomethyl (C)]K_	P13671	0.896599	0.896599	1.46974e-06	2.7068e-06	102	P13671	C6	Complement component C6	CO6_HUMAN	1	86.1672	1.86167	Dengue	QC	NaN	NaN	NaN	33.7753	0.154537
Dengue / QC	_GPDFFTR_	P20160	1.24637	1.24637	1.49346e-06	2.74628e-06	32	P20160	AZU1	Azurocidin	CAP7_HUMAN	1	137.245	2.37245	Dengue	QC	NaN	NaN	NaN	24.6095	0.221844
Dengue / QC	_ASTPNGYDNGIIWATWK_	P02679;P02679-2	1.46794	1.46794	1.51353e-06	2.7815e-06	46	P02679;P02679-2	FGG	Fibrinogen gamma chain;Isoform Gamma-A of Fibrinogen gamma chain	FIBG_HUMAN	1	176.627	2.76627	Dengue	QC	NaN	NaN	NaN	38.1012	0.2013
Dengue / QC	_C[Carbamidomethyl (C)]GPLMDC[Carbamidomethyl (C)]R_	G3XAK1;P26927	0.841472	0.841472	1.51695e-06	2.78693e-06	56	G3XAK1;P26927	MST1	Hepatocyte growth factor-like protein	G3XAK1_HUMAN;HGFL_HUMAN	1	79.1878	1.79188	Dengue	QC	NaN	NaN	NaN	35.3304	0.204814
Dengue / QC	_MENAELDVPIQSVFTR_	P07996	0.407033	0.407033	1.52022e-06	2.79208e-06	124	P07996	THBS1	Thrombospondin-1	TSP1_HUMAN	1	32.5956	1.32596	Dengue	QC	NaN	NaN	NaN	79.0941	0.099611
Dengue / QC	_TNPC[Carbamidomethyl (C)]LHGGR_	P00748	1.60916	1.60916	1.52432e-06	2.79706e-06	80	P00748	F12	Coagulation factor XII	FA12_HUMAN	1	205.075	3.05075	Dengue	QC	NaN	NaN	NaN	63.104	0.269215
Dengue / QC	_KADGSYAAWLSR_	P0C0L5	-0.383173	0.383173	1.5338e-06	2.81352e-06	174	P0C0L5	C4B	Complement C4-B	CO4B_HUMAN	1	-23.3251	0.766749	Dengue	QC	NaN	NaN	NaN	131.333	0.0754999
Dengue / QC	_WSSPPQC[Carbamidomethyl (C)]EGLPC[Carbamidomethyl (C)]KSPPEISHGVVAHMSDSYQYGEEVTYK_	P08603	1.23251	1.23251	1.53668e-06	2.81546e-06	88	P08603	CFH	Complement factor H	CFAH_HUMAN	1	134.975	2.34975	Dengue	QC	NaN	NaN	NaN	76.2491	0.21262
Dengue / QC	_EMEC[Carbamidomethyl (C)]AGTYDGSIDAC[Carbamidomethyl (C)]K_	E7ETH0;G3XAM2;P05156	0.473949	0.473949	1.55942e-06	2.85366e-06	40	E7ETH0;G3XAM2;P05156	CFI	Complement factor I	E7ETH0_HUMAN;G3XAM2_HUMAN;CFAI_HUMAN	1	38.8907	1.38891	Dengue	QC	NaN	NaN	NaN	30.9567	0.103738
Dengue / QC	_EIGELYLPK_	P01011	-0.431561	0.431561	1.5772e-06	2.88268e-06	176	P01011	SERPINA3	Alpha-1-antichymotrypsin	AACT_HUMAN	1	-25.8541	0.741459	Dengue	QC	NaN	NaN	NaN	122.414	0.0775284
Dengue / QC	_GDELADSALEIFK_	Q15582	0.920653	0.920653	1.60102e-06	2.92267e-06	38	Q15582	TGFBI	Transforming growth factor-beta-induced protein ig-h3	BGH3_HUMAN	1	89.2972	1.89297	Dengue	QC	NaN	NaN	NaN	21.8606	0.174282
Dengue / QC	_ETTFNSLLC[Carbamidomethyl (C)]PSGGEVSEELSLKLPPNVVEESAR_	P01023	0.562879	0.562879	1.60912e-06	2.93568e-06	176	P01023	A2M	Alpha-2-macroglobulin	A2MG_HUMAN	1	47.7215	1.47721	Dengue	QC	NaN	NaN	NaN	117.166	0.118696
Dengue / QC	_VVFLNTQLC[Carbamidomethyl (C)]QFRPDAFGGLPR_	P22792	0.254844	0.254844	1.61805e-06	2.95109e-06	138	P22792	CPN2	Carboxypeptidase N subunit 2	CPN2_HUMAN	1	19.3207	1.19321	Dengue	QC	NaN	NaN	NaN	86.9255	0.0634472
Dengue / QC	_LLRDADDLQK_	P02649	0.96881	0.96881	1.62461e-06	2.96126e-06	74	P02649	APOE	Apolipoprotein E	APOE_HUMAN	1	95.7225	1.95722	Dengue	QC	NaN	NaN	NaN	50.0656	0.238514
Dengue / QC	_LVTDLTKVHTEC[Carbamidomethyl (C)]C[Carbamidomethyl (C)]HGDLLEC[Carbamidomethyl (C)]ADDR_	P02768	0.97229	0.97229	1.62677e-06	2.96365e-06	152	P02768	ALB	Serum albumin	ALBU_HUMAN	1	96.1952	1.96195	Dengue	QC	NaN	NaN	NaN	132.06	0.189525
Dengue / QC	_NSLYLQM[Oxidation (M)]NSLR_	P01782	-0.714376	0.714376	1.63783e-06	2.98174e-06	160	P01782	IGHV3-9	Immunoglobulin heavy variable 3-9	HV309_HUMAN	1	-39.0531	0.609469	Dengue	QC	NaN	NaN	NaN	55.9483	0.135498
Dengue / QC	_DEPTYILNIKR_	P04114	1.93704	1.93704	1.71429e-06	3.10872e-06	20	P04114	APOB	Apolipoprotein B-100	APOB_HUMAN	1	282.919	3.82919	Dengue	QC	NaN	NaN	NaN	10.9381	0.202319
Dengue / QC	_IPGTC[Carbamidomethyl (C)]C[Carbamidomethyl (C)]DTC[Carbamidomethyl (C)]EEPEC[Carbamidomethyl (C)]NDITAR_	P04275	0.872561	0.872561	1.71829e-06	3.11504e-06	66	P04275	VWF	von Willebrand factor	VWF_HUMAN	1	83.091	1.83091	Dengue	QC	NaN	NaN	NaN	57.9524	0.156569
Dengue / QC	_VPQVSTPTLVEVSRNLGK_	P02768	2.72342	2.72342	1.72813e-06	3.13194e-06	98	P02768	ALB	Serum albumin	ALBU_HUMAN	1	560.437	6.60437	Dengue	QC	NaN	NaN	NaN	69.7836	0.490926
Dengue / QC	_RDTANLFPQTSLTLHMWPDTEGTFNVEC[Carbamidomethyl (C)]LTTDHYTGGMK_	P00450	0.652147	0.652147	1.73531e-06	3.14213e-06	172	P00450	CP	Ceruloplasmin	CERU_HUMAN	1	57.1505	1.5715	Dengue	QC	NaN	NaN	NaN	125.626	0.110599
Dengue / QC	_GQPLSPEK_	P01871	-0.633709	0.633709	1.74245e-06	3.15315e-06	174	P01871	IGHM	Immunoglobulin heavy constant mu	IGHM_HUMAN	1	-35.5483	0.644517	Dengue	QC	NaN	NaN	NaN	56.0363	0.11694
Dengue / QC	_TVGSDTFYSFKYEIKEGDC[Carbamidomethyl (C)]PVQSGK_	P01042	0.830821	0.830821	1.74454e-06	3.15599e-06	110	P01042	KNG1	Kininogen-1	KNG1_HUMAN	1	77.8697	1.7787	Dengue	QC	NaN	NaN	NaN	100.451	0.134095
Dengue / QC	_GHFTEEDKATITSLWGK_	P69891;P69892	4.02612	4.02612	1.78201e-06	3.21955e-06	20	P69891;P69892	HBG1;HBG2	Hemoglobin subunit gamma-1;Hemoglobin subunit gamma-2	HBG1_HUMAN;HBG2_HUMAN	1	1529.23	16.2923	Dengue	QC	NaN	NaN	NaN	13.1279	0.47307
Dengue / QC	_NAEELKAR_	P06727	0.922786	0.922786	1.78406e-06	3.22168e-06	74	P06727	APOA4	Apolipoprotein A-IV	APOA4_HUMAN	1	89.5773	1.89577	Dengue	QC	NaN	NaN	NaN	35.9296	0.194472
Dengue / QC	_VNRNNLELSTPLKIETISHEDLQR_	P07225	0.47278	0.47278	1.79844e-06	3.24375e-06	120	P07225	PROS1	Vitamin K-dependent protein S	PROS_HUMAN	1	38.7781	1.38778	Dengue	QC	NaN	NaN	NaN	90.6415	0.0979273
Dengue / QC	_C[Carbamidomethyl (C)]PFPSRPDNGFVNYPAKPTLYYK_	P02749	0.272467	0.272467	1.82482e-06	3.2874e-06	176	P02749	APOH	Beta-2-glycoprotein 1	APOH_HUMAN	1	20.7872	1.20787	Dengue	QC	NaN	NaN	NaN	103.963	0.0552121
Dengue / QC	_THTC[Carbamidomethyl (C)]PPC[Carbamidomethyl (C)]PAPELLGGPSVFLFPPKPKDTLMISR_	P01857	2.21139	2.21139	1.83426e-06	3.30046e-06	82	P01857	IGHG1	Immunoglobulin heavy constant gamma 1	IGHG1_HUMAN	1	363.121	4.63121	Dengue	QC	NaN	NaN	NaN	69.1584	0.315341
Dengue / QC	_VSNKGLPAPIEK_	P01859	1.48689	1.48689	1.881e-06	3.38153e-06	176	P01859	IGHG2	Immunoglobulin heavy constant gamma 2	IGHG2_HUMAN	1	180.285	2.80285	Dengue	QC	NaN	NaN	NaN	153.758	0.26189
Dengue / QC	_EGMLSIMSYR_	P01031	0.16231	0.16231	1.89984e-06	3.41337e-06	116	P01031	C5	Complement C5	CO5_HUMAN	1	11.9078	1.11908	Dengue	QC	NaN	NaN	NaN	99.8076	0.0709444
Dengue / QC	_NANFKFTDHLK_	P00738	2.16306	2.16306	1.90446e-06	3.41964e-06	102	P00738	HP	Haptoglobin	HPT_HUMAN	1	347.865	4.47865	Dengue	QC	NaN	NaN	NaN	75.4858	0.335023
Dengue / QC	_KGETFSC[Carbamidomethyl (C)]MVGHEALPLAFTQK_	A0A286YEY5;P01877	1.16848	1.16848	1.9111e-06	3.43054e-06	114	A0A286YEY5;P01877	IGHA2	Immunoglobulin heavy constant alpha 2 (Fragment);Immunoglobulin heavy constant alpha 2	A0A286YEY5_HUMAN;IGHA2_HUMAN	1	124.774	2.24774	Dengue	QC	NaN	NaN	NaN	76.249	0.204323
Dengue / QC	_QKVEPLR_	P02647	0.408178	0.408178	1.9176e-06	3.44016e-06	128	P02647	APOA1	Apolipoprotein A-I	APOA1_HUMAN	1	32.7009	1.32701	Dengue	QC	NaN	NaN	NaN	55.8131	0.127172
Dengue / QC	_SDVM[Oxidation (M)]YTDWK_	P19652	-0.466159	0.466159	1.92312e-06	3.44902e-06	168	P19652	ORM2	Alpha-1-acid glycoprotein 2	A1AG2_HUMAN	1	-27.6111	0.723889	Dengue	QC	NaN	NaN	NaN	60.2837	0.0903795
Dengue / QC	_YGM[Oxidation (M)]VAQVTQTLK_	P04114	3.26092	3.26092	1.96783e-06	3.52396e-06	72	P04114	APOB	Apolipoprotein B-100	APOB_HUMAN	1	858.593	9.58593	Dengue	QC	NaN	NaN	NaN	31.3508	0.264386
Dengue / QC	_SRAPAVPAPIQAPSAILPLPGQSVER_	Q14624-2	1.27454	1.27454	1.96899e-06	3.52499e-06	54	Q14624-2	ITIH4	Isoform 2 of Inter-alpha-trypsin inhibitor heavy chain H4	ITIH4_HUMAN	1	141.921	2.41921	Dengue	QC	NaN	NaN	NaN	40.0777	0.212777
Dengue / QC	_DIYKGVDMR_	H0YAC1;P03952	0.339534	0.339534	1.97666e-06	3.53662e-06	124	H0YAC1;P03952	KLKB1	Plasma kallikrein (Fragment);Plasma kallikrein	H0YAC1_HUMAN;KLKB1_HUMAN	1	26.5348	1.26535	Dengue	QC	NaN	NaN	NaN	42.058	0.103943
Dengue / QC	_QKLHELQEKLSPLGEEMR_	P02647	0.741579	0.741579	1.99323e-06	3.56415e-06	106	P02647	APOA1	Apolipoprotein A-I	APOA1_HUMAN	1	67.2004	1.672	Dengue	QC	NaN	NaN	NaN	68.1921	0.347778
Dengue / QC	_LLC[Carbamidomethyl (C)]QC[Carbamidomethyl (C)]LGFGSGHFR_	P02751;P02751-15;P02751-3;P02751-7	0.448507	0.448507	1.99427e-06	3.56496e-06	148	P02751;P02751-15;P02751-3;P02751-7	FN1	Fibronectin;Isoform 15 of Fibronectin;Isoform 3 of Fibronectin;Isoform 7 of Fibronectin	FINC_HUMAN	1	36.4628	1.36463	Dengue	QC	NaN	NaN	NaN	136.989	0.090591
Dengue / QC	_AGFEWNEDGAGTTPSPGLQPAHLTFPLDYHLNQPFIFVLR_	P36955	0.701731	0.701731	2.01246e-06	3.59428e-06	84	P36955	SERPINF1	Pigment epithelium-derived factor	PEDF_HUMAN	1	62.6455	1.62646	Dengue	QC	NaN	NaN	NaN	56.9623	0.148256
Dengue / QC	_ENADSLQASLRPHADELKAK_	P06727	1.02638	1.02638	2.03101e-06	3.6231e-06	64	P06727	APOA4	Apolipoprotein A-IV	APOA4_HUMAN	1	103.691	2.03691	Dengue	QC	NaN	NaN	NaN	54.5127	0.151624
Dengue / QC	_TLSPVLESPR_	A0A087X0I0;A0A140T8Y3;A0A140T8Z8;A0A140TA52;P22105;P22105-3;P22105-4	0.49504	0.49504	2.03479e-06	3.62879e-06	44	A0A087X0I0;A0A140T8Y3;A0A140T8Z8;A0A140TA52;P22105;P22105-3;P22105-4	TNXB	Tenascin-X;Tenascin-X;Tenascin-X (Fragment);Tenascin-X;Tenascin-X;Isoform 4 of Tenascin-X;Isoform 5 of Tenascin-X	A0A087X0I0_HUMAN;A0A140T8Y3_HUMAN;A0A140T8Z8_HUMAN;A0A140TA52_HUMAN;TENX_HUMAN;TENX_HUMAN;TENX_HUMAN	1	40.936	1.40936	Dengue	QC	NaN	NaN	NaN	27.7489	0.193624
Dengue / QC	_FDHVITNMNNNYEPR_	D6R934;P02746	-0.512813	0.512813	2.05716e-06	3.66651e-06	172	D6R934;P02746	C1QB	Complement C1q subcomponent subunit B	D6R934_HUMAN;C1QB_HUMAN	1	-29.9145	0.700855	Dengue	QC	NaN	NaN	NaN	36.4646	0.0978061
Dengue / QC	_C[Carbamidomethyl (C)]EELQGQK_	P27918	0.740806	0.740806	2.07169e-06	3.68926e-06	36	P27918	CFP	Properdin	PROP_HUMAN	1	67.111	1.67111	Dengue	QC	NaN	NaN	NaN	27.2521	0.1291
Dengue / QC	_GSC[Carbamidomethyl (C)]ERDAQYAPGYDK_	B4E1Z4	1.49828	1.49828	2.0849e-06	3.70936e-06	38	B4E1Z4	NaN	cDNA FLJ55673, highly similar to Complement factor B (EC 3.4.21.47)	B4E1Z4_HUMAN	1	182.505	2.82505	Dengue	QC	NaN	NaN	NaN	30.7718	0.2546
Dengue / QC	_IGLDLPALNMQR_	P05164;P05164-2;P05164-3	0.966532	0.966532	2.0917e-06	3.72036e-06	50	P05164;P05164-2;P05164-3	MPO	Myeloperoxidase;Isoform H14 of Myeloperoxidase;Isoform H7 of Myeloperoxidase	PERM_HUMAN	1	95.4137	1.95414	Dengue	QC	NaN	NaN	NaN	33.9564	0.209078
Dengue / QC	_GFQVVVTLR_	P09871	0.723782	0.723782	2.10174e-06	3.73492e-06	120	P09871	C1S	Complement C1s subcomponent	C1S_HUMAN	1	65.1506	1.65151	Dengue	QC	NaN	NaN	NaN	72.8196	0.143218
Dengue / QC	_LQDRGPDVLTATVSGK_	Q14624	-0.542655	0.542655	2.16445e-06	3.83054e-06	174	Q14624	ITIH4	Inter-alpha-trypsin inhibitor heavy chain H4	ITIH4_HUMAN	1	-31.3494	0.686506	Dengue	QC	NaN	NaN	NaN	45.9163	0.0982565
Dengue / QC	_AGLAASLAGPHSIVGR_	P08294	1.48296	1.48296	2.17214e-06	3.84189e-06	30	P08294	SOD3	Extracellular superoxide dismutase [Cu-Zn]	SODE_HUMAN	1	179.522	2.79522	Dengue	QC	NaN	NaN	NaN	24.1352	0.230533
Dengue / QC	_GNRIAQWQSFQLEGGLKQFSFPLSSEPFQGSYK_	P01023	1.05618	1.05618	2.20008e-06	3.88902e-06	136	P01023	A2M	Alpha-2-macroglobulin	A2MG_HUMAN	1	107.942	2.07942	Dengue	QC	NaN	NaN	NaN	118.05	0.136187
Dengue / QC	_AYWDIM[Oxidation (M)]ISNHQNSNR_	A0A096LPE2	0.646206	0.646206	2.2422e-06	3.95883e-06	22	A0A096LPE2	SAA2-SAA4	SAA2-SAA4 readthrough	A0A096LPE2_HUMAN	1	56.5047	1.56505	Dengue	QC	NaN	NaN	NaN	17.1962	0.0878581
Dengue / QC	_KPIWLSQMSC[Carbamidomethyl (C)]SGR_	O43866	-0.492732	0.492732	2.28699e-06	4.03318e-06	174	O43866	CD5L	CD5 antigen-like	CD5L_HUMAN	1	-28.9322	0.710678	Dengue	QC	NaN	NaN	NaN	53.6168	0.0980692
Dengue / QC	_VLSLAQEQVGGSPEKLQETSNWLLSQQQADGSFQDPC[Carbamidomethyl (C)]PVLDR_	A0A140TA49	0.699383	0.699383	2.28873e-06	4.03508e-06	124	A0A140TA49	C4A	Complement C4-A	A0A140TA49_HUMAN	1	62.381	1.62381	Dengue	QC	NaN	NaN	NaN	109.649	0.149923
Dengue / QC	_VPTVEPLDSLTLFLFR_	J3QQR8;J3QQX6;J3QRQ1;P13598	1.09123	1.09123	2.30489e-06	4.06036e-06	48	J3QQR8;J3QQX6;J3QRQ1;P13598	ICAM2	Intercellular adhesion molecule 2 (Fragment);Intercellular adhesion molecule 2 (Fragment);Intercellular adhesion molecule 2 (Fragment);Intercellular adhesion molecule 2	J3QQR8_HUMAN;J3QQX6_HUMAN;J3QRQ1_HUMAN;ICAM2_HUMAN	1	113.056	2.13056	Dengue	QC	NaN	NaN	NaN	10.0078	0.120025
Dengue / QC	_EWVAIESDSVQPVPR_	Q96KN2	0.650857	0.650857	2.31098e-06	4.06836e-06	54	Q96KN2	CNDP1	Beta-Ala-His dipeptidase	CNDP1_HUMAN	1	57.0101	1.5701	Dengue	QC	NaN	NaN	NaN	44.2159	0.137328
Dengue / QC	_VQQPDC[Carbamidomethyl (C)]R_	P0C0L5	0.539919	0.539919	2.31711e-06	4.07677e-06	116	P0C0L5	C4B	Complement C4-B	CO4B_HUMAN	1	45.3891	1.45389	Dengue	QC	NaN	NaN	NaN	51.6019	0.113167
Dengue / QC	_VGSDSVQC[Carbamidomethyl (C)]YQFGWSPNFPTC[Carbamidomethyl (C)]K_	Q9BXR6	0.872429	0.872429	2.36761e-06	4.15833e-06	46	Q9BXR6	CFHR5	Complement factor H-related protein 5	FHR5_HUMAN	1	83.0743	1.83074	Dengue	QC	NaN	NaN	NaN	38.272	0.190476
Dengue / QC	_EKAEAQAQYSAAVAK_	Q14624	-0.70785	0.70785	2.37438e-06	4.16798e-06	176	Q14624	ITIH4	Inter-alpha-trypsin inhibitor heavy chain H4	ITIH4_HUMAN	1	-38.7768	0.612232	Dengue	QC	NaN	NaN	NaN	41.668	0.144559
Dengue / QC	_AYYHLLEQVAPKGDEEGVPAVVIDMSGLR_	P13796	0.462098	0.462098	2.37818e-06	4.17203e-06	94	P13796	LCP1	Plastin-2	PLSL_HUMAN	1	37.7543	1.37754	Dengue	QC	NaN	NaN	NaN	85.1606	0.140405
Dengue / QC	_IYISGMAPRPSLAKK_	P04004	0.635525	0.635525	2.38096e-06	4.17568e-06	170	P04004	VTN	Vitronectin	VTNC_HUMAN	1	55.3503	1.5535	Dengue	QC	NaN	NaN	NaN	118.803	0.100879
Dengue / QC	_LDLQEINNWVQAQMK_	P36955	0.702559	0.702559	2.39501e-06	4.19789e-06	118	P36955	SERPINF1	Pigment epithelium-derived factor	PEDF_HUMAN	1	62.7388	1.62739	Dengue	QC	NaN	NaN	NaN	81.5162	0.154784
Dengue / QC	_NSTFSEIFKK_	P29401;P29401-2	4.07164	4.07164	2.41061e-06	4.22278e-06	18	P29401;P29401-2	TKT	Transketolase;Isoform 2 of Transketolase	TKT_HUMAN	1	1581.46	16.8146	Dengue	QC	NaN	NaN	NaN	9.66992	0.385552
Dengue / QC	_NPDPWAKNLNEKDYELLC[Carbamidomethyl (C)]LDGTR_	P02787	0.715315	0.715315	2.41138e-06	4.22288e-06	44	P02787	TF	Serotransferrin	TRFE_HUMAN	1	64.1842	1.64184	Dengue	QC	NaN	NaN	NaN	26.5765	0.380833
Dengue / QC	_YAASSYLSLTPEQWKSHR_	P0DOY2	0.45517	0.45517	2.4275e-06	4.24865e-06	166	P0DOY2	IGLC2	Immunoglobulin lambda constant 2	IGLC2_HUMAN	1	37.0944	1.37094	Dengue	QC	NaN	NaN	NaN	158.773	0.11674
Dengue / QC	_FSAEFDFR_	P07225	0.404273	0.404273	2.43886e-06	4.2673e-06	140	P07225	PROS1	Vitamin K-dependent protein S	PROS_HUMAN	1	32.3422	1.32342	Dengue	QC	NaN	NaN	NaN	87.7221	0.0753777
Dengue / QC	_SILFLGK_	P05543	-0.644304	0.644304	2.45863e-06	4.29815e-06	172	P05543	SERPINA7	Thyroxine-binding globulin	THBG_HUMAN	1	-36.0199	0.639801	Dengue	QC	NaN	NaN	NaN	41.3577	0.115392
Dengue / QC	_KAFC[Carbamidomethyl (C)]SFQIYAVPWQGTMTLSK_	P01034	0.886694	0.886694	2.46366e-06	4.3057e-06	56	P01034	CST3	Cystatin-C	CYTC_HUMAN	1	84.8934	1.84893	Dengue	QC	NaN	NaN	NaN	51.0195	0.216062
Dengue / QC	_NSLYLQMNSLK_	A0A0B4J1Y9	-0.399515	0.399515	2.46538e-06	4.30745e-06	164	A0A0B4J1Y9	IGHV3-72	Immunoglobulin heavy variable 3-72	HV372_HUMAN	1	-24.1887	0.758113	Dengue	QC	NaN	NaN	NaN	92.2665	0.0773028
Dengue / QC	_MLADAPPQDPSC[Carbamidomethyl (C)]C[Carbamidomethyl (C)]SGALYYGSK_	P19823	0.342668	0.342668	2.47988e-06	4.3265e-06	176	P19823	ITIH2	Inter-alpha-trypsin inhibitor heavy chain H2	ITIH2_HUMAN	1	26.8099	1.2681	Dengue	QC	NaN	NaN	NaN	136.998	0.0660513
Dengue / QC	_AVVFLEPQWYSVLEKDSVTLK_	A0A087WZR4	1.65302	1.65302	2.52495e-06	4.39877e-06	36	A0A087WZR4	FCGR3B	Low affinity immunoglobulin gamma Fc region receptor III-B	A0A087WZR4_HUMAN	1	214.491	3.14491	Dengue	QC	NaN	NaN	NaN	21.0132	0.220805
Dengue / QC	_FNHLGHIFTFTPQNNEFQLQLSPK_	P04275	0.929212	0.929212	2.53348e-06	4.41236e-06	58	P04275	VWF	von Willebrand factor	VWF_HUMAN	1	90.4235	1.90424	Dengue	QC	NaN	NaN	NaN	47.6892	0.21943
Dengue / QC	_LLIYGASIR_	A0A087WSY6	-0.408873	0.408873	2.57295e-06	4.47721e-06	176	A0A087WSY6	IGKV3D-15	Immunoglobulin kappa variable 3D-15	KVD15_HUMAN	1	-24.6788	0.753212	Dengue	QC	NaN	NaN	NaN	82.4045	0.0745494
Dengue / QC	_KC[Carbamidomethyl (C)]C[Carbamidomethyl (C)]YDGAC[Carbamidomethyl (C)]VNNDETC[Carbamidomethyl (C)]EQR_	P01031	0.753505	0.753505	2.60881e-06	4.53177e-06	76	P01031	C5	Complement C5	CO5_HUMAN	1	68.5884	1.68588	Dengue	QC	NaN	NaN	NaN	68.317	0.126644
Dengue / QC	_DSTLIMQLLR_	P62258	0.856783	0.856783	2.66135e-06	4.61771e-06	16	P62258	YWHAE	14-3-3 protein epsilon	1433E_HUMAN	1	81.0996	1.811	Dengue	QC	NaN	NaN	NaN	7.97234	0.207472
Dengue / QC	_AIHLDLEEYR_	Q96KN2	0.457299	0.457299	2.68428e-06	4.65214e-06	94	Q96KN2	CNDP1	Beta-Ala-His dipeptidase	CNDP1_HUMAN	1	37.2969	1.37297	Dengue	QC	NaN	NaN	NaN	87.5802	0.104761
Dengue / QC	_NVVFVIDK_	Q14624	-0.50339	0.50339	2.69082e-06	4.66213e-06	176	Q14624	ITIH4	Inter-alpha-trypsin inhibitor heavy chain H4	ITIH4_HUMAN	1	-29.4553	0.705447	Dengue	QC	NaN	NaN	NaN	39.3936	0.101755
Dengue / QC	_KTDELPQLVTLPHPNLHGPEILDVPSTVQK_	P02751;P02751-15;P02751-3;P02751-7	1.74466	1.74466	2.76113e-06	4.77845e-06	48	P02751;P02751-15;P02751-3;P02751-7	FN1	Fibronectin;Isoform 15 of Fibronectin;Isoform 3 of Fibronectin;Isoform 7 of Fibronectin	FINC_HUMAN	1	235.116	3.35116	Dengue	QC	NaN	NaN	NaN	13.1421	0.1219
Dengue / QC	_TLIEKTNEER_	P10909;P10909-2;P10909-4;P10909-5	0.476687	0.476687	2.76986e-06	4.79219e-06	146	P10909;P10909-2;P10909-4;P10909-5	CLU	Clusterin;Isoform 2 of Clusterin;Isoform 4 of Clusterin;Isoform 5 of Clusterin	CLUS_HUMAN	1	39.1545	1.39154	Dengue	QC	NaN	NaN	NaN	125.217	0.111988
Dengue / QC	_KEDSC[Carbamidomethyl (C)]QLGYSAGPC[Carbamidomethyl (C)]M[Oxidation (M)]GMTSR_	P02760	1.05536	1.05536	2.78621e-06	4.81632e-06	22	P02760	AMBP	Protein AMBP	AMBP_HUMAN	1	107.824	2.07824	Dengue	QC	NaN	NaN	NaN	17.4345	0.176352
Dengue / QC	_AFQPFFVELTMPYSVIR_	P01023	0.43554	0.43554	2.78741e-06	4.81701e-06	176	P01023	A2M	Alpha-2-macroglobulin	A2MG_HUMAN	1	35.2417	1.35242	Dengue	QC	NaN	NaN	NaN	165.3	0.089695
Dengue / QC	_AARLPVAPLRK_	P09871	1.46029	1.46029	2.78996e-06	4.82003e-06	52	P09871	C1S	Complement C1s subcomponent	C1S_HUMAN	1	175.165	2.75165	Dengue	QC	NaN	NaN	NaN	42.9808	0.240805
Dengue / QC	_GGEGTGYFVDFSVR_	P04196	0.364848	0.364848	2.79532e-06	4.82791e-06	176	P04196	HRG	Histidine-rich glycoprotein	HRG_HUMAN	1	28.7746	1.28775	Dengue	QC	NaN	NaN	NaN	130.11	0.0753532
Dengue / QC	_IYGNQDTSSQLKKFYNQVSTPLLR_	P19823	0.710816	0.710816	2.9387e-06	5.05383e-06	124	P19823	ITIH2	Inter-alpha-trypsin inhibitor heavy chain H2	ITIH2_HUMAN	1	63.673	1.63673	Dengue	QC	NaN	NaN	NaN	107.043	0.116411
Dengue / QC	_ADDKETC[Carbamidomethyl (C)]FAEEGK_	P02768	-0.456238	0.456238	2.94686e-06	5.06641e-06	176	P02768	ALB	Serum albumin	ALBU_HUMAN	1	-27.1116	0.728884	Dengue	QC	NaN	NaN	NaN	60.6982	0.0839657
Dengue / QC	_IGEHTPSALAIMENANVLAR_	P04075	1.35985	1.35985	2.95563e-06	5.07859e-06	52	P04075	ALDOA	Fructose-bisphosphate aldolase A	ALDOA_HUMAN	1	156.659	2.56659	Dengue	QC	NaN	NaN	NaN	25.2565	0.228009
Dengue / QC	_TPGAVNAC[Carbamidomethyl (C)]HLSC[Carbamidomethyl (C)]SALLQDNIADAVAC[Carbamidomethyl (C)]AK_	P61626	1.18151	1.18151	2.9941e-06	5.13445e-06	26	P61626	LYZ	Lysozyme C	LYSC_HUMAN	1	126.815	2.26815	Dengue	QC	NaN	NaN	NaN	18.5562	0.154579
Dengue / QC	_C[Carbamidomethyl (C)]QFFSYATQTFHKAEYR_	H0YAC1;P03952	1.62199	1.62199	3.05227e-06	5.22083e-06	34	H0YAC1;P03952	KLKB1	Plasma kallikrein (Fragment);Plasma kallikrein	H0YAC1_HUMAN;KLKB1_HUMAN	1	207.799	3.07799	Dengue	QC	NaN	NaN	NaN	28.6568	0.230085
Dengue / QC	_NPDAVAAPYC[Carbamidomethyl (C)]YTRDPGVR_	P08519	2.29816	2.29816	3.18118e-06	5.4198e-06	22	P08519	LPA	Apolipoprotein(a)	APOA_HUMAN	1	391.83	4.9183	Dengue	QC	NaN	NaN	NaN	16.1599	0.293798
Dengue / QC	_DALSSVQESQVAQQAR_	B0YIW2;P02656	-0.349609	0.349609	3.23895e-06	5.51041e-06	176	B0YIW2;P02656	APOC3	Apolipoprotein C-III	B0YIW2_HUMAN;APOC3_HUMAN	1	-21.5203	0.784797	Dengue	QC	NaN	NaN	NaN	111.045	0.0747747
Dengue / QC	_SLEDKTER_	P00734	0.480235	0.480235	3.25051e-06	5.52697e-06	154	P00734	F2	Prothrombin	THRB_HUMAN	1	39.4971	1.39497	Dengue	QC	NaN	NaN	NaN	71.055	0.138682
Dengue / QC	_NDNDNIFLSPLSISTAFAMTK_	P01008	0.755637	0.755637	3.28334e-06	5.57335e-06	34	P01008	SERPINC1	Antithrombin-III	ANT3_HUMAN	1	68.8377	1.68838	Dengue	QC	NaN	NaN	NaN	26.8028	0.160323
Dengue / QC	_ALYYDLISSPDIHGTYKELLDTVTAPQK_	P36955	1.05854	1.05854	3.2924e-06	5.58716e-06	150	P36955	SERPINF1	Pigment epithelium-derived factor	PEDF_HUMAN	1	108.282	2.08282	Dengue	QC	NaN	NaN	NaN	92.023	0.179405
Dengue / QC	_ALANSLAC[Carbamidomethyl (C)]QGK_	P04075	1.98181	1.98181	3.33071e-06	5.64582e-06	20	P04075	ALDOA	Fructose-bisphosphate aldolase A	ALDOA_HUMAN	1	294.987	3.94987	Dengue	QC	NaN	NaN	NaN	10.6377	0.321525
Dengue / QC	_HRHPDEAAFFDTASTGK_	P02671	2.18604	2.18604	3.36897e-06	5.70265e-06	174	P02671	FGA	Fibrinogen alpha chain	FIBA_HUMAN	1	355.056	4.55056	Dengue	QC	NaN	NaN	NaN	142.583	0.370967
Dengue / QC	_DMIC[Carbamidomethyl (C)]AGEKEGGKDAC[Carbamidomethyl (C)]AGDSGGPMVTLNR_	P48740	0.80413	0.80413	3.40058e-06	5.7497e-06	40	P48740	MASP1	Mannan-binding lectin serine protease 1	MASP1_HUMAN	1	74.6093	1.74609	Dengue	QC	NaN	NaN	NaN	24.7299	0.23517
Dengue / QC	_HTFMGVVSLGSPSGEVSHPRK_	P02765	1.90736	1.90736	3.51499e-06	5.92817e-06	50	P02765	AHSG	Alpha-2-HS-glycoprotein	FETUA_HUMAN	1	275.121	3.75121	Dengue	QC	NaN	NaN	NaN	29.4059	0.281724
Dengue / QC	_GSWVNKFPVEMTHNHNFR_	P05546	0.891764	0.891764	3.58012e-06	6.02788e-06	84	P05546	SERPIND1	Heparin cofactor 2	HEP2_HUMAN	1	85.5443	1.85544	Dengue	QC	NaN	NaN	NaN	22.4402	0.125664
Dengue / QC	_STGGAPTFNVTVTK_	P07737	0.471996	0.471996	3.59874e-06	6.05585e-06	104	P07737	PFN1	Profilin-1	PROF1_HUMAN	1	38.7027	1.38703	Dengue	QC	NaN	NaN	NaN	95.6657	0.0911208
Dengue / QC	_TQNPMVTGTSVLGVK_	P28070	2.65921	2.65921	3.62868e-06	6.10113e-06	16	P28070	PSMB4	Proteasome subunit beta type-4	PSB4_HUMAN	1	531.686	6.31686	Dengue	QC	NaN	NaN	NaN	8.07615	0.242766
Dengue / QC	_SC[Carbamidomethyl (C)]PTC[Carbamidomethyl (C)]TDSLLNGDFTITYDVNR_	Q06033;Q06033-2	9.45734	9.45734	3.64152e-06	6.11929e-06	26	Q06033;Q06033-2	ITIH3	Inter-alpha-trypsin inhibitor heavy chain H3;Isoform 2 of Inter-alpha-trypsin inhibitor heavy chain H3	ITIH3_HUMAN	1	70198.1	702.981	Dengue	QC	NaN	NaN	NaN	9.94863	0.566405
Dengue / QC	_LPGDIQVVPIGVGPNANVQELER_	P04275	0.588202	0.588202	3.71185e-06	6.23054e-06	112	P04275	VWF	von Willebrand factor	VWF_HUMAN	1	50.3372	1.50337	Dengue	QC	NaN	NaN	NaN	107.913	0.132773
Dengue / QC	_C[Carbamidomethyl (C)]LVNLIEKVASYGVKPR_	B4E1Z4	0.480131	0.480131	3.72645e-06	6.25155e-06	122	B4E1Z4	NaN	cDNA FLJ55673, highly similar to Complement factor B (EC 3.4.21.47)	B4E1Z4_HUMAN	1	39.487	1.39487	Dengue	QC	NaN	NaN	NaN	58.6853	0.101598
Dengue / QC	_AGALQLLLVGDKVPHDLDMLLR_	P55058	1.67111	1.67111	3.73207e-06	6.25835e-06	32	P55058	PLTP	Phospholipid transfer protein	PLTP_HUMAN	1	218.46	3.1846	Dengue	QC	NaN	NaN	NaN	26.0486	0.26149
Dengue / QC	_IAQWQSLK_	P20742	2.82724	2.82724	3.79333e-06	6.34961e-06	86	P20742	PZP	Pregnancy zone protein	PZP_HUMAN	1	609.715	7.09715	Dengue	QC	NaN	NaN	NaN	59.9601	0.527751
Dengue / QC	_GWVTDGFSSLK_	B0YIW2;P02656	1.57136	1.57136	3.79227e-06	6.34961e-06	22	B0YIW2;P02656	APOC3	Apolipoprotein C-III	B0YIW2_HUMAN;APOC3_HUMAN	1	197.185	2.97185	Dengue	QC	NaN	NaN	NaN	15.72	0.211305
Dengue / QC	_GIVEEC[Carbamidomethyl (C)]C[Carbamidomethyl (C)]FR_	P01344;P01344-3	0.315074	0.315074	3.81369e-06	6.38015e-06	164	P01344;P01344-3	IGF2	Insulin-like growth factor II;Isoform 3 of Insulin-like growth factor II	IGF2_HUMAN	1	24.4075	1.24408	Dengue	QC	NaN	NaN	NaN	103.189	0.0686167
Dengue / QC	_ITITNDQNR_	P11021	1.66872	1.66872	3.81612e-06	6.38245e-06	20	P11021	HSPA5	78 kDa glucose-regulated protein	GRP78_HUMAN	1	217.932	3.17932	Dengue	QC	NaN	NaN	NaN	8.50497	0.767422
Dengue / QC	_LEPGKEYLIM[Oxidation (M)]GLDGATYDLEGHPQYLLDSNSWIEEMPSER_	P0C0L5	1.12343	1.12343	3.85247e-06	6.43609e-06	22	P0C0L5	C4B	Complement C4-B	CO4B_HUMAN	1	117.865	2.17865	Dengue	QC	NaN	NaN	NaN	11.1979	0.307034
Dengue / QC	_TIVRFNRPFLMIIVPTDTQNIFFM[Oxidation (M)]SK_	P01011	1.16968	1.16968	3.88046e-06	6.47567e-06	106	P01011	SERPINA3	Alpha-1-antichymotrypsin	AACT_HUMAN	1	124.962	2.24962	Dengue	QC	NaN	NaN	NaN	87.442	0.2292
Dengue / QC	_EPQVYTLPPSREEMTKNQVSLTC[Carbamidomethyl (C)]LVK_	P01860	1.47661	1.47661	3.88615e-06	6.48336e-06	140	P01860	IGHG3	Immunoglobulin heavy constant gamma 3	IGHG3_HUMAN	1	178.294	2.78294	Dengue	QC	NaN	NaN	NaN	114.484	0.256883
Dengue / QC	_DDWFMLGLR_	I3L145;P04278	0.818613	0.818613	3.92738e-06	6.54672e-06	64	I3L145;P04278	SHBG	Sex hormone-binding globulin	I3L145_HUMAN;SHBG_HUMAN	1	76.371	1.76371	Dengue	QC	NaN	NaN	NaN	32.6618	0.276083
Dengue / QC	_SGSSTASWIQNVDTK_	P04114	0.327346	0.327346	4.01373e-06	6.67958e-06	88	P04114	APOB	Apolipoprotein B-100	APOB_HUMAN	1	25.4703	1.2547	Dengue	QC	NaN	NaN	NaN	63.3854	0.1001
Dengue / QC	_PGGLLLGDVAPNFEANTTVGR_	P30041	1.17267	1.17267	4.05168e-06	6.73716e-06	20	P30041	PRDX6	Peroxiredoxin-6	PRDX6_HUMAN	1	125.429	2.25429	Dengue	QC	NaN	NaN	NaN	9.72386	0.110655
Dengue / QC	_GLLIFDASSSWGPQMSASVHLDSK_	P04114	1.68688	1.68688	4.11257e-06	6.83138e-06	30	P04114	APOB	Apolipoprotein B-100	APOB_HUMAN	1	221.96	3.2196	Dengue	QC	NaN	NaN	NaN	14.3068	0.370621
Dengue / QC	_C[Carbamidomethyl (C)]C[Carbamidomethyl (C)]AAADPHEC[Carbamidomethyl (C)]YAKVFDEFKPLVEEPQNLIK_	P02768	0.652513	0.652513	4.11402e-06	6.83138e-06	60	P02768	ALB	Serum albumin	ALBU_HUMAN	1	57.1904	1.5719	Dengue	QC	NaN	NaN	NaN	23.4484	0.397804
Dengue / QC	_KVLLDGVQNPRAEDLVGK_	P01024	0.93926	0.93926	4.13103e-06	6.85774e-06	134	P01024	C3	Complement C3	CO3_HUMAN	1	91.7544	1.91754	Dengue	QC	NaN	NaN	NaN	122.09	0.165758
Dengue / QC	_EGDDDRTVC[Carbamidomethyl (C)]R_	P10909;P10909-2;P10909-4;P10909-5	0.65712	0.65712	4.14626e-06	6.87923e-06	160	P10909;P10909-2;P10909-4;P10909-5	CLU	Clusterin;Isoform 2 of Clusterin;Isoform 4 of Clusterin;Isoform 5 of Clusterin	CLUS_HUMAN	1	57.6931	1.57693	Dengue	QC	NaN	NaN	NaN	79.5033	0.095733
Dengue / QC	_ANRPFLVFIR_	P01008	-0.389461	0.389461	4.15451e-06	6.89102e-06	172	P01008	SERPINC1	Antithrombin-III	ANT3_HUMAN	1	-23.6585	0.763415	Dengue	QC	NaN	NaN	NaN	78.5099	0.0742844
Dengue / QC	_TVIGPDGHKEVTKEVVTSEDGSDC[Carbamidomethyl (C)]PEAM[Oxidation (M)]DLGTLSGIGTLDGFR_	P02671	3.02837	3.02837	4.21569e-06	6.97714e-06	48	P02671	FGA	Fibrinogen alpha chain	FIBA_HUMAN	1	715.89	8.1589	Dengue	QC	NaN	NaN	NaN	12.1646	0.298411
Dengue / QC	_TC[Carbamidomethyl (C)]QAWSSMTPHSHSR_	P08519	1.26248	1.26248	4.2491e-06	7.02664e-06	160	P08519	LPA	Apolipoprotein(a)	APOA_HUMAN	1	139.908	2.39908	Dengue	QC	NaN	NaN	NaN	130.633	0.237349
Dengue / QC	_NTFAEVTGLSPGVTYYFK_	P02751;P02751-15;P02751-3;P02751-7	0.428268	0.428268	4.29684e-06	7.08808e-06	154	P02751;P02751-15;P02751-3;P02751-7	FN1	Fibronectin;Isoform 15 of Fibronectin;Isoform 3 of Fibronectin;Isoform 7 of Fibronectin	FINC_HUMAN	1	34.5617	1.34562	Dengue	QC	NaN	NaN	NaN	105.717	0.0971444
Dengue / QC	_QTAC[Carbamidomethyl (C)]KPEIAYAYK_	P01031	0.492022	0.492022	4.30659e-06	7.10222e-06	38	P01031	C5	Complement C5	CO5_HUMAN	1	40.6415	1.40641	Dengue	QC	NaN	NaN	NaN	20.5343	0.138299
Dengue / QC	_TEHYEEQIEAFK_	P02748	-0.438303	0.438303	4.32059e-06	7.12335e-06	168	P02748	C9	Complement component C9	CO9_HUMAN	1	-26.1998	0.738002	Dengue	QC	NaN	NaN	NaN	57.6471	0.087346
Dengue / QC	_YTHLSC[Carbamidomethyl (C)]DKVFC[Carbamidomethyl (C)]QPWQR_	E7ETH0;G3XAM2;P05156	0.551678	0.551678	4.33398e-06	7.14348e-06	116	E7ETH0;G3XAM2;P05156	CFI	Complement factor I	E7ETH0_HUMAN;G3XAM2_HUMAN;CFAI_HUMAN	1	46.579	1.46579	Dengue	QC	NaN	NaN	NaN	76.1227	0.126173
Dengue / QC	_AHVDALR_	P02647	0.448644	0.448644	4.39307e-06	7.23692e-06	158	P02647	APOA1	Apolipoprotein A-I	APOA1_HUMAN	1	36.4757	1.36476	Dengue	QC	NaN	NaN	NaN	97.253	0.105513
Dengue / QC	_LKC[Carbamidomethyl (C)]LAYDFYPGK_	P25311	1.33538	1.33538	4.43384e-06	7.28614e-06	48	P25311	AZGP1	Zinc-alpha-2-glycoprotein	ZA2G_HUMAN	1	152.342	2.52342	Dengue	QC	NaN	NaN	NaN	40.801	0.254492
Dengue / QC	_IVSSAMEPDR_	P08603	0.745725	0.745725	4.46181e-06	7.33011e-06	76	P08603	CFH	Complement factor H	CFAH_HUMAN	1	67.6816	1.67682	Dengue	QC	NaN	NaN	NaN	19.4072	0.148565
Dengue / QC	_SM[Oxidation (M)]QGGLVGNDETVALTAFVTIALHHGLAVFQDEGAEPLKQR_	P0C0L5	1.36082	1.36082	4.46495e-06	7.33327e-06	40	P0C0L5	C4B	Complement C4-B	CO4B_HUMAN	1	156.83	2.5683	Dengue	QC	NaN	NaN	NaN	24.7089	0.199367
Dengue / QC	_VKEGMNIVEAMER_	P62937	0.492724	0.492724	4.50746e-06	7.39704e-06	84	P62937	PPIA	Peptidyl-prolyl cis-trans isomerase A	PPIA_HUMAN	1	40.7099	1.4071	Dengue	QC	NaN	NaN	NaN	78.3715	0.0766362
Dengue / QC	_DQTIRFDHVITNM[Oxidation (M)]NNNYEPR_	D6R934;P02746	0.928458	0.928458	4.52605e-06	7.42352e-06	116	D6R934;P02746	C1QB	Complement C1q subcomponent subunit B	D6R934_HUMAN;C1QB_HUMAN	1	90.324	1.90324	Dengue	QC	NaN	NaN	NaN	69.0098	0.134037
Dengue / QC	_SRLDTLAQEVALLKEQQALQTVC[Carbamidomethyl (C)]LK_	E9PHK0;P05452	0.621222	0.621222	4.55544e-06	7.46968e-06	42	E9PHK0;P05452	CLEC3B	Tetranectin	E9PHK0_HUMAN;TETN_HUMAN	1	53.8177	1.53818	Dengue	QC	NaN	NaN	NaN	23.2833	0.185453
Dengue / QC	_MKGLIDEVNQDFTNRINK_	P02671	1.84721	1.84721	4.5972e-06	7.53333e-06	28	P02671	FGA	Fibrinogen alpha chain	FIBA_HUMAN	1	259.803	3.59803	Dengue	QC	NaN	NaN	NaN	10.44	0.223437
Dengue / QC	_KAPDAGGC[Carbamidomethyl (C)]LHADPDLGVLC[Carbamidomethyl (C)]PTGC[Carbamidomethyl (C)]QLQEALLQQERPIR_	P02675	1.69303	1.69303	4.63192e-06	7.58683e-06	138	P02675	FGB	Fibrinogen beta chain	FIBB_HUMAN	1	223.334	3.23334	Dengue	QC	NaN	NaN	NaN	127.079	0.349962
Dengue / QC	_KEDSC[Carbamidomethyl (C)]QLGYSAGPC[Carbamidomethyl (C)]MGM[Oxidation (M)]TSR_	P02760	1.06704	1.06704	4.64273e-06	7.60248e-06	26	P02760	AMBP	Protein AMBP	AMBP_HUMAN	1	109.513	2.09513	Dengue	QC	NaN	NaN	NaN	20.9042	0.177235
Dengue / QC	_TPEGLTLLFK_	P09172	1.59827	1.59827	4.6625e-06	7.63277e-06	32	P09172	DBH	Dopamine beta-hydroxylase	DOPO_HUMAN	1	202.779	3.02779	Dengue	QC	NaN	NaN	NaN	12.5335	0.211613
Dengue / QC	_VSSVEEC[Carbamidomethyl (C)]QKR_	H0YAC1;P03952	0.645153	0.645153	4.66959e-06	7.64231e-06	120	H0YAC1;P03952	KLKB1	Plasma kallikrein (Fragment);Plasma kallikrein	H0YAC1_HUMAN;KLKB1_HUMAN	1	56.3905	1.56391	Dengue	QC	NaN	NaN	NaN	48.5591	0.175082
Dengue / QC	_HC[Carbamidomethyl (C)]LVTVEK_	P07225	0.511073	0.511073	4.84193e-06	7.90717e-06	72	P07225	PROS1	Vitamin K-dependent protein S	PROS_HUMAN	1	42.511	1.42511	Dengue	QC	NaN	NaN	NaN	63.7176	0.0950985
Dengue / QC	_SVSSDLQPYLQTLPVTTEIDSFADIDYSLVEAPR_	P18428	1.30836	1.30836	4.85927e-06	7.93119e-06	68	P18428	LBP	Lipopolysaccharide-binding protein	LBP_HUMAN	1	147.66	2.4766	Dengue	QC	NaN	NaN	NaN	18.2835	0.203102
Dengue / QC	_LLLQM[Oxidation (M)]DSSATAYGSTVSKR_	P04114	0.537411	0.537411	4.86725e-06	7.94207e-06	58	P04114	APOB	Apolipoprotein B-100	APOB_HUMAN	1	45.1365	1.45137	Dengue	QC	NaN	NaN	NaN	34.9188	0.154258
Dengue / QC	_C[Carbamidomethyl (C)]C[Carbamidomethyl (C)]HC[Carbamidomethyl (C)]C[Carbamidomethyl (C)]LLGR_	P23142	1.37832	1.37832	4.92397e-06	8.02592e-06	78	P23142	FBLN1	Fibulin-1	FBLN1_HUMAN	1	159.965	2.59965	Dengue	QC	NaN	NaN	NaN	70.3983	0.30222
Dengue / QC	_RQDGSVDFFR_	O75636	-0.58017	0.58017	4.96997e-06	8.09779e-06	158	O75636	FCN3	Ficolin-3	FCN3_HUMAN	1	-33.1115	0.668885	Dengue	QC	NaN	NaN	NaN	43.8268	0.114656
Dengue / QC	_ATVLNYLPK_	P01023	-0.461675	0.461675	4.99641e-06	8.13739e-06	172	P01023	A2M	Alpha-2-macroglobulin	A2MG_HUMAN	1	-27.3857	0.726143	Dengue	QC	NaN	NaN	NaN	96.5218	0.0869323
Dengue / QC	_QIKKQTALVELVK_	P02768	1.3383	1.3383	5.00384e-06	8.1473e-06	176	P02768	ALB	Serum albumin	ALBU_HUMAN	1	152.853	2.52853	Dengue	QC	NaN	NaN	NaN	158.82	0.263281
Dengue / QC	_LLELTGPK_	P04217	-0.394531	0.394531	5.07023e-06	8.2487e-06	176	P04217	A1BG	Alpha-1B-glycoprotein	A1BG_HUMAN	1	-23.9263	0.760737	Dengue	QC	NaN	NaN	NaN	50.2274	0.0779996
Dengue / QC	_MYSVNGYTFGSLPGLSMC[Carbamidomethyl (C)]AEDR_	P00450	0.528123	0.528123	5.11435e-06	8.31454e-06	136	P00450	CP	Ceruloplasmin	CERU_HUMAN	1	44.2052	1.44205	Dengue	QC	NaN	NaN	NaN	84.294	0.132567
Dengue / QC	_SSGSLLNNAIK_	P01023	-0.427833	0.427833	5.20169e-06	8.44661e-06	176	P01023	A2M	Alpha-2-macroglobulin	A2MG_HUMAN	1	-25.6623	0.743377	Dengue	QC	NaN	NaN	NaN	90.9775	0.0776433
Dengue / QC	_TSC[Carbamidomethyl (C)]LLFMGR_	P05546	0.325429	0.325429	5.20957e-06	8.45714e-06	142	P05546	SERPIND1	Heparin cofactor 2	HEP2_HUMAN	1	25.3037	1.25304	Dengue	QC	NaN	NaN	NaN	109.806	0.0904908
Dengue / QC	_LLIYGNSNRPSGVPDR_	P01703	-0.803701	0.803701	5.25182e-06	8.51717e-06	172	P01703	IGLV1-40	Immunoglobulin lambda variable 1-40	LV140_HUMAN	1	-42.7122	0.572878	Dengue	QC	NaN	NaN	NaN	47.6152	0.155666
Dengue / QC	_FLLKAEPLAFTFSHDYK_	P04114	0.970259	0.970259	5.25822e-06	8.52463e-06	38	P04114	APOB	Apolipoprotein B-100	APOB_HUMAN	1	95.9193	1.95919	Dengue	QC	NaN	NaN	NaN	32.6356	0.158057
Dengue / QC	_QPPAWSIR_	A0A182DWH7;P49908	0.162577	0.162577	5.30411e-06	8.5921e-06	108	A0A182DWH7;P49908	SELENOP	Selenoprotein P (Fragment);Selenoprotein P	A0A182DWH7_HUMAN;SEPP1_HUMAN	1	11.9285	1.11928	Dengue	QC	NaN	NaN	NaN	57.1037	0.0772972
Dengue / QC	_SGLSTGWTQLSKLLELTGPK_	P04217	1.36496	1.36496	5.40136e-06	8.73085e-06	158	P04217	A1BG	Alpha-1B-glycoprotein	A1BG_HUMAN	1	157.569	2.57569	Dengue	QC	NaN	NaN	NaN	135.197	0.235595
Dengue / QC	_QAQC[Carbamidomethyl (C)]GQDFQC[Carbamidomethyl (C)]K_	P07357	0.549069	0.549069	5.43858e-06	8.78394e-06	98	P07357	C8A	Complement component C8 alpha chain	CO8A_HUMAN	1	46.3141	1.46314	Dengue	QC	NaN	NaN	NaN	43.3967	0.106431
Dengue / QC	_NADLQVLKPEPELVYEDLR_	P01833	1.53144	1.53144	5.48317e-06	8.85121e-06	60	P01833	PIGR	Polymeric immunoglobulin receptor	PIGR_HUMAN	1	189.074	2.89074	Dengue	QC	NaN	NaN	NaN	44.7557	0.299171
Dengue / QC	_LVVLPFPK_	Q9UGM5	-0.510805	0.510805	5.55632e-06	8.9621e-06	172	Q9UGM5	FETUB	Fetuin-B	FETUB_HUMAN	1	-29.8169	0.701831	Dengue	QC	NaN	NaN	NaN	57.0042	0.0933174
Dengue / QC	_PQYMVLVPSLLHTETTEK_	P01023	0.53133	0.53133	5.61916e-06	9.0586e-06	118	P01023	A2M	Alpha-2-macroglobulin	A2MG_HUMAN	1	44.5261	1.44526	Dengue	QC	NaN	NaN	NaN	107.179	0.109595
Dengue / QC	_NIQEYLSILTDPDGKGKEK_	P04114	0.457005	0.457005	5.73697e-06	9.23617e-06	82	P04114	APOB	Apolipoprotein B-100	APOB_HUMAN	1	37.2689	1.37269	Dengue	QC	NaN	NaN	NaN	77.3536	0.125407
Dengue / QC	_QLVEIEKVVLHPNYHQVDIGLIK_	P00739	1.22721	1.22721	5.79882e-06	9.32292e-06	114	P00739	HPR	Haptoglobin-related protein	HPTR_HUMAN	1	134.113	2.34113	Dengue	QC	NaN	NaN	NaN	53.2638	0.161
Dengue / QC	_SGQSEDRQPVPGQQMTLKIEGDHGAR_	P01024	0.748609	0.748609	5.91511e-06	9.49253e-06	140	P01024	C3	Complement C3	CO3_HUMAN	1	68.0172	1.68017	Dengue	QC	NaN	NaN	NaN	118.912	0.151676
Dengue / QC	_REQPGVYTK_	H0YAC1;P03952	0.391327	0.391327	5.99223e-06	9.60607e-06	162	H0YAC1;P03952	KLKB1	Plasma kallikrein (Fragment);Plasma kallikrein	H0YAC1_HUMAN;KLKB1_HUMAN	1	31.1599	1.3116	Dengue	QC	NaN	NaN	NaN	55.1868	0.0814215
Dengue / QC	_MFGNLQGLTMHVGDEVNWYLMGMGNEIDLHTVHFHGHSFQYK_	P00450	0.610412	0.610412	6.03666e-06	9.66943e-06	28	P00450	CP	Ceruloplasmin	CERU_HUMAN	1	52.6696	1.5267	Dengue	QC	NaN	NaN	NaN	16.4055	0.174038
Dengue / QC	_GLEEELQFSLGSK_	P0C0L5	0.51684	0.51684	6.11506e-06	9.77695e-06	170	P0C0L5	C4B	Complement C4-B	CO4B_HUMAN	1	43.0818	1.43082	Dengue	QC	NaN	NaN	NaN	124.009	0.0924066
Dengue / QC	_FTISTDNSK_	A0A075B7B8	0.755306	0.755306	6.16704e-06	9.84779e-06	20	A0A075B7B8	IGHV3OR16-12	Immunoglobulin heavy variable 3/OR16-12 (non-functional) (Fragment)	A0A075B7B8_HUMAN	1	68.7989	1.68799	Dengue	QC	NaN	NaN	NaN	14.7991	0.128848
Dengue / QC	_DIFPNTVFADSNIDSVMAPDAFVC[Carbamidomethyl (C)]GR_	P03951	1.32942	1.32942	6.18573e-06	9.87361e-06	26	P03951	F11	Coagulation factor XI	FA11_HUMAN	1	151.301	2.51301	Dengue	QC	NaN	NaN	NaN	8.87634	0.14143
Dengue / QC	_MDAHPPR_	P06396	0.620949	0.620949	6.18899e-06	9.87421e-06	126	P06396	GSN	Gelsolin	GELS_HUMAN	1	53.7887	1.53789	Dengue	QC	NaN	NaN	NaN	96.6106	0.138416
Dengue / QC	_LC[Carbamidomethyl (C)]FFYNKK_	P43652	0.579417	0.579417	6.19157e-06	9.87571e-06	106	P43652	AFM	Afamin	AFAM_HUMAN	1	49.4246	1.49425	Dengue	QC	NaN	NaN	NaN	78.6123	0.0904938
Dengue / QC	_IVQIYKDLLR_	P43652	0.745092	0.745092	6.23257e-06	9.93322e-06	30	P43652	AFM	Afamin	AFAM_HUMAN	1	67.6081	1.67608	Dengue	QC	NaN	NaN	NaN	22.9448	0.154691
Dengue / QC	_HLSQDTGSPSGMRPWEDLPSQDTGSPSR_	A0A0A0MRJ7;P12259	0.639397	0.639397	6.30127e-06	1.00374e-05	54	A0A0A0MRJ7;P12259	F5	Coagulation factor V	A0A0A0MRJ7_HUMAN;FA5_HUMAN	1	55.7678	1.55768	Dengue	QC	NaN	NaN	NaN	35.3791	0.146082
Dengue / QC	_FRVVSMDENFHPLNELIPLVYIQDPKGNR_	P01023	1.55144	1.55144	6.4094e-06	1.01935e-05	102	P01023	A2M	Alpha-2-macroglobulin	A2MG_HUMAN	1	193.11	2.9311	Dengue	QC	NaN	NaN	NaN	83.5865	0.22511
Dengue / QC	_AHSC[Carbamidomethyl (C)]PSVWKK_	P07225	0.565298	0.565298	6.58642e-06	1.04639e-05	104	P07225	PROS1	Vitamin K-dependent protein S	PROS_HUMAN	1	47.9694	1.47969	Dengue	QC	NaN	NaN	NaN	31.1321	0.157383
Dengue / QC	_GHFSISIPVK_	P01023	-0.421661	0.421661	6.64215e-06	1.05441e-05	176	P01023	A2M	Alpha-2-macroglobulin	A2MG_HUMAN	1	-25.3436	0.746564	Dengue	QC	NaN	NaN	NaN	113.269	0.0856736
Dengue / QC	_NFPDLNTYIYYNEK_	P15169	0.484381	0.484381	6.78919e-06	1.07577e-05	128	P15169	CPN1	Carboxypeptidase N catalytic chain	CBPN_HUMAN	1	39.8986	1.39899	Dengue	QC	NaN	NaN	NaN	38.4605	0.100859
Dengue / QC	_QAPGQELGWMGR_	A0A075B7D0	-0.428657	0.428657	6.80388e-06	1.07782e-05	176	A0A075B7D0	IGHV1OR15-1	Immunoglobulin heavy variable 1/OR15-1 (non-functional) (Fragment)	A0A075B7D0_HUMAN	1	-25.7047	0.742953	Dengue	QC	NaN	NaN	NaN	120.667	0.0858954
Dengue / QC	_ADQVC[Carbamidomethyl (C)]INLR_	Q12805;Q12805-2;Q12805-4	0.415708	0.415708	6.81442e-06	1.0792e-05	172	Q12805;Q12805-2;Q12805-4	EFEMP1	EGF-containing fibulin-like extracellular matrix protein 1;Isoform 2 of EGF-containing fibulin-like extracellular matrix protein 1;Isoform 4 of EGF-containing fibulin-like extracellular matrix protein 1	FBLN3_HUMAN	1	33.3953	1.33395	Dengue	QC	NaN	NaN	NaN	160.852	0.110731
Dengue / QC	_NPREDYLDVYVFGVGPLVNQVNINALASK_	B4E1Z4	0.78848	0.78848	6.93607e-06	1.09703e-05	44	B4E1Z4	NaN	cDNA FLJ55673, highly similar to Complement factor B (EC 3.4.21.47)	B4E1Z4_HUMAN	1	72.7253	1.72725	Dengue	QC	NaN	NaN	NaN	36.5956	0.16331
Dengue / QC	_VFEAM[Oxidation (M)]NSYDLGC[Carbamidomethyl (C)]GPGGGDSALQVFQAAGLAFSDGDQWTLSR_	P0C0L5	1.02515	1.02515	7.09442e-06	1.1202e-05	88	P0C0L5	C4B	Complement C4-B	CO4B_HUMAN	1	103.517	2.03517	Dengue	QC	NaN	NaN	NaN	20.792	0.167777
Dengue / QC	_FQFPGKPGIYTR_	P04114	0.735237	0.735237	7.21001e-06	1.13648e-05	22	P04114	APOB	Apolipoprotein B-100	APOB_HUMAN	1	66.4671	1.66467	Dengue	QC	NaN	NaN	NaN	9.46234	0.0953045
Dengue / QC	_TVRDTLPSC[Carbamidomethyl (C)]AVR_	Q96PD5	0.760991	0.760991	7.2416e-06	1.14086e-05	152	Q96PD5	PGLYRP2	N-acetylmuramoyl-L-alanine amidase	PGRP2_HUMAN	1	69.4655	1.69465	Dengue	QC	NaN	NaN	NaN	85.3134	0.116869
Dengue / QC	_GQGTLSVVTMYHAK_	P01024	-0.308124	0.308124	7.27509e-06	1.14584e-05	176	P01024	C3	Complement C3	CO3_HUMAN	1	-19.2309	0.807691	Dengue	QC	NaN	NaN	NaN	73.1152	0.0568425
Dengue / QC	_YGTLFTMDR_	Q15582	0.656709	0.656709	7.29204e-06	1.14791e-05	38	Q15582	TGFBI	Transforming growth factor-beta-induced protein ig-h3	BGH3_HUMAN	1	57.6482	1.57648	Dengue	QC	NaN	NaN	NaN	29.903	0.118781
Dengue / QC	_C[Carbamidomethyl (C)]QAYESNR_	P43652	0.919439	0.919439	7.45137e-06	1.17085e-05	48	P43652	AFM	Afamin	AFAM_HUMAN	1	89.138	1.89138	Dengue	QC	NaN	NaN	NaN	24.8216	0.127036
Dengue / QC	_TIHLTMPQLVLQGSYDLQDLLAQAELPAILHTELNLQK_	P01019	0.808892	0.808892	7.58878e-06	1.19088e-05	104	P01019	AGT	Angiotensinogen	ANGT_HUMAN	1	75.1865	1.75187	Dengue	QC	NaN	NaN	NaN	43.2459	0.135108
Dengue / QC	_VAAGAFQGLR_	P02750	-0.362343	0.362343	7.61661e-06	1.19463e-05	170	P02750	LRG1	Leucine-rich alpha-2-glycoprotein	A2GL_HUMAN	1	-22.21	0.7779	Dengue	QC	NaN	NaN	NaN	109.097	0.082011
Dengue / QC	_LHLETDSLALVALGALDTALYAAGSKSHKPLNMGK_	P0C0L5	1.21406	1.21406	7.65271e-06	1.19998e-05	74	P0C0L5	C4B	Complement C4-B	CO4B_HUMAN	1	131.99	2.3199	Dengue	QC	NaN	NaN	NaN	22.4832	0.236118
Dengue / QC	_AFIQLWAFDAVKGK_	P02760	1.47974	1.47974	7.65779e-06	1.20046e-05	138	P02760	AMBP	Protein AMBP	AMBP_HUMAN	1	178.898	2.78898	Dengue	QC	NaN	NaN	NaN	103.164	0.212673
Dengue / QC	_SIAPGAFDRLPNLSSLTLSR_	P40197	1.49268	1.49268	7.66746e-06	1.20135e-05	28	P40197	GP5	Platelet glycoprotein V	GPV_HUMAN	1	181.412	2.81412	Dengue	QC	NaN	NaN	NaN	22.4055	0.188699
Dengue / QC	_GFLLWYSGR_	Q15113	0.84171	0.84171	7.6756e-06	1.20191e-05	48	Q15113	PCOLCE	Procollagen C-endopeptidase enhancer 1	PCOC1_HUMAN	1	79.2173	1.79217	Dengue	QC	NaN	NaN	NaN	33.0216	0.18719
Dengue / QC	_FLDQGLDDNYC[Carbamidomethyl (C)]R_	G3XAK1;P26927	0.748436	0.748436	7.73864e-06	1.20999e-05	24	G3XAK1;P26927	MST1	Hepatocyte growth factor-like protein	G3XAK1_HUMAN;HGFL_HUMAN	1	67.9971	1.67997	Dengue	QC	NaN	NaN	NaN	14.5911	0.0566864
Dengue / QC	_TAC[Carbamidomethyl (C)]GDC[Carbamidomethyl (C)]TSGSSEC[Carbamidomethyl (C)]MWC[Carbamidomethyl (C)]SNMK_	O75882;O75882-2	0.69285	0.69285	8.09887e-06	1.26173e-05	96	O75882;O75882-2	ATRN	Attractin;Isoform 2 of Attractin	ATRN_HUMAN	1	61.6474	1.61647	Dengue	QC	NaN	NaN	NaN	80.9479	0.153008
Dengue / QC	_VIEKFPAPVHIC[Carbamidomethyl (C)]VSWESSSGIAEFWINGTPLVKK_	P02743	1.42849	1.42849	8.10324e-06	1.26209e-05	40	P02743	APCS	Serum amyloid P-component	SAMP_HUMAN	1	169.165	2.69165	Dengue	QC	NaN	NaN	NaN	6.61878	0.146706
Dengue / QC	_HRQGPVNLLSDPEQGVEVTGQYEREK_	Q14624	0.850585	0.850585	8.25518e-06	1.2831e-05	164	Q14624	ITIH4	Inter-alpha-trypsin inhibitor heavy chain H4	ITIH4_HUMAN	1	80.3232	1.80323	Dengue	QC	NaN	NaN	NaN	145.546	0.158809
Dengue / QC	_TGISPLALIKGM[Oxidation (M)]TRPLSTLISSSQSC[Carbamidomethyl (C)]QYTLDAK_	P04114	0.865663	0.865663	8.29995e-06	1.28906e-05	28	P04114	APOB	Apolipoprotein B-100	APOB_HUMAN	1	82.2176	1.82218	Dengue	QC	NaN	NaN	NaN	12.893	0.196173
Dengue / QC	_SPYIDKITHYNYLILSK_	P01031	0.65913	0.65913	8.35142e-06	1.29672e-05	74	P01031	C5	Complement C5	CO5_HUMAN	1	57.913	1.57913	Dengue	QC	NaN	NaN	NaN	62.7809	0.117209
Dengue / QC	_LTGSC[Carbamidomethyl (C)]SYVLFQNK_	P04275	0.600523	0.600523	8.4483e-06	1.31109e-05	66	P04275	VWF	von Willebrand factor	VWF_HUMAN	1	51.6266	1.51627	Dengue	QC	NaN	NaN	NaN	49.1314	0.17063
Dengue / QC	_NIGEFC[Carbamidomethyl (C)]GK_	B4DPQ0	0.575944	0.575944	8.53436e-06	1.32308e-05	132	B4DPQ0	C1R	Complement C1r subcomponent	B4DPQ0_HUMAN	1	49.0652	1.49065	Dengue	QC	NaN	NaN	NaN	45.9053	0.116224
Dengue / QC	_FEGIAC[Carbamidomethyl (C)]EISK_	P02748	-0.348398	0.348398	8.54219e-06	1.32395e-05	172	P02748	C9	Complement component C9	CO9_HUMAN	1	-21.4544	0.785456	Dengue	QC	NaN	NaN	NaN	71.7197	0.070591
Dengue / QC	_QIGSVYR_	P04196	-0.559985	0.559985	8.60551e-06	1.33191e-05	134	P04196	HRG	Histidine-rich glycoprotein	HRG_HUMAN	1	-32.1691	0.678309	Dengue	QC	NaN	NaN	NaN	61.0071	0.103187
Dengue / QC	_NPNGYSFSIPVK_	P04114	0.354823	0.354823	8.60329e-06	1.33191e-05	66	P04114	APOB	Apolipoprotein B-100	APOB_HUMAN	1	27.8829	1.27883	Dengue	QC	NaN	NaN	NaN	49.8444	0.0697641
Dengue / QC	_HDGNMVFSPFGMSLAMTGLMLGATGPTETQIKR_	G3V2W1;Q9UK55	0.958826	0.958826	8.60953e-06	1.33199e-05	28	G3V2W1;Q9UK55	SERPINA10	Protein Z-dependent protease inhibitor	G3V2W1_HUMAN;ZPI_HUMAN	1	94.3727	1.94373	Dengue	QC	NaN	NaN	NaN	17.88	0.195234
Dengue / QC	_IYGKWYNLAIGSTC[Carbamidomethyl (C)]PWLK_	P02760	1.16607	1.16607	8.806e-06	1.35994e-05	36	P02760	AMBP	Protein AMBP	AMBP_HUMAN	1	124.399	2.24399	Dengue	QC	NaN	NaN	NaN	27.5454	0.255433
Dengue / QC	_EMEDTLNHLK_	A6XND0;P17936;P17936-2	0.60811	0.60811	8.88475e-06	1.3714e-05	118	A6XND0;P17936;P17936-2	IGFBP3	Insulin-like growth factor-binding protein 3;Insulin-like growth factor-binding protein 3;Isoform 2 of Insulin-like growth factor-binding protein 3	A6XND0_HUMAN;IBP3_HUMAN;IBP3_HUMAN	1	52.4261	1.52426	Dengue	QC	NaN	NaN	NaN	65.1421	0.177421
Dengue / QC	_SHC[Carbamidomethyl (C)]IAEVENDEMPADLPSLAADFVESKDVC[Carbamidomethyl (C)]KNYAEAK_	P02768	0.964441	0.964441	8.90553e-06	1.3739e-05	176	P02768	ALB	Serum albumin	ALBU_HUMAN	1	95.1307	1.95131	Dengue	QC	NaN	NaN	NaN	156.354	0.192706
Dengue / QC	_ESDTSYVSLKAPLTKPLK_	P02741	0.96615	0.96615	8.97978e-06	1.38465e-05	58	P02741	CRP	C-reactive protein	CRP_HUMAN	1	95.3621	1.95362	Dengue	QC	NaN	NaN	NaN	47.9059	0.182325
Dengue / QC	_LLFDGDAHLLMSIPSPFR_	Q9Y6R7	1.19059	1.19059	9.13296e-06	1.40719e-05	26	Q9Y6R7	FCGBP	IgGFc-binding protein	FCGBP_HUMAN	1	128.246	2.28246	Dengue	QC	NaN	NaN	NaN	9.95962	0.376558
Dengue / QC	_VGFYESDVMGR_	P01023	-0.370546	0.370546	9.20119e-06	1.41698e-05	176	P01023	A2M	Alpha-2-macroglobulin	A2MG_HUMAN	1	-22.651	0.77349	Dengue	QC	NaN	NaN	NaN	60.7809	0.0814219
Dengue / QC	_LAAYLM[Oxidation (M)]LMR_	P04114	0.280896	0.280896	9.30821e-06	1.43309e-05	26	P04114	APOB	Apolipoprotein B-100	APOB_HUMAN	1	21.4949	1.21495	Dengue	QC	NaN	NaN	NaN	19.5508	0.10714
Dengue / QC	_VFSNGADLSGVTEEAPLK_	P01009	-0.534335	0.534335	9.31376e-06	1.43358e-05	168	P01009	SERPINA1	Alpha-1-antitrypsin	A1AT_HUMAN	1	-30.9523	0.690477	Dengue	QC	NaN	NaN	NaN	101.098	0.0971046
Dengue / QC	_TPC[Carbamidomethyl (C)]TVSC[Carbamidomethyl (C)]NIPVVSGKEC[Carbamidomethyl (C)]EEIIR_	P02675	1.73794	1.73794	9.38198e-06	1.44261e-05	116	P02675	FGB	Fibrinogen beta chain	FIBB_HUMAN	1	233.559	3.33559	Dengue	QC	NaN	NaN	NaN	107.822	0.352935
Dengue / QC	_AEDTALYYC[Carbamidomethyl (C)]AK_	P01782	-0.557287	0.557287	9.5785e-06	1.47132e-05	176	P01782	IGHV3-9	Immunoglobulin heavy variable 3-9	HV309_HUMAN	1	-32.0421	0.679579	Dengue	QC	NaN	NaN	NaN	55.9159	0.113719
Dengue / QC	_SSQSLLHSDGK_	A0A075B6S2;A2NJV5	0.892572	0.892572	9.61553e-06	1.47664e-05	86	A0A075B6S2;A2NJV5	IGKV2D-29;IGKV2-29	Immunoglobulin kappa variable 2D-29;Immunoglobulin kappa variable 2-29	KVD29_HUMAN;KV229_HUMAN	1	85.6483	1.85648	Dengue	QC	NaN	NaN	NaN	73.1958	0.173882
Dengue / QC	_ADLEKLTSLSDRYVSHFETEGPHVLLYFDSVPTSR_	P0C0L5	0.424203	0.424203	9.76505e-06	1.49845e-05	126	P0C0L5	C4B	Complement C4-B	CO4B_HUMAN	1	34.1831	1.34183	Dengue	QC	NaN	NaN	NaN	89.6329	0.105517
Dengue / QC	_HSTIFENLANK_	P02787	-0.350544	0.350544	9.80977e-06	1.50455e-05	176	P02787	TF	Serotransferrin	TRFE_HUMAN	1	-21.5712	0.784288	Dengue	QC	NaN	NaN	NaN	91.0236	0.0681367
Dengue / QC	_TDASDVKPC[Carbamidomethyl (C)]_	P02749	0.502245	0.502245	9.81295e-06	1.50465e-05	102	P02749	APOH	Beta-2-glycoprotein 1	APOH_HUMAN	1	41.6416	1.41642	Dengue	QC	NaN	NaN	NaN	77.7831	0.110065
Dengue / QC	_VQYEC[Carbamidomethyl (C)]ATGYYTAGGK_	P05160	0.105385	0.105385	9.97504e-06	1.52756e-05	128	P05160	F13B	Coagulation factor XIII B chain	F13B_HUMAN	1	7.57813	1.07578	Dengue	QC	NaN	NaN	NaN	87.8768	0.0719132
Dengue / QC	_LPSNVVK_	P20742	1.17376	1.17376	1.00435e-05	1.53766e-05	38	P20742	PZP	Pregnancy zone protein	PZP_HUMAN	1	125.599	2.25599	Dengue	QC	NaN	NaN	NaN	9.11117	0.128211
Dengue / QC	_NFATSNK_	P04114	1.43136	1.43136	1.00606e-05	1.53988e-05	26	P04114	APOB	Apolipoprotein B-100	APOB_HUMAN	1	169.7	2.697	Dengue	QC	NaN	NaN	NaN	18.9121	0.28578
Dengue / QC	_SDIAPVAR_	P01023	-0.411289	0.411289	1.01521e-05	1.55231e-05	172	P01023	A2M	Alpha-2-macroglobulin	A2MG_HUMAN	1	-24.8049	0.751951	Dengue	QC	NaN	NaN	NaN	89.5028	0.0907465
Dengue / QC	_ISEITNIVSK_	P20742	2.97515	2.97515	1.02097e-05	1.56032e-05	58	P20742	PZP	Pregnancy zone protein	PZP_HUMAN	1	686.336	7.86336	Dengue	QC	NaN	NaN	NaN	42.118	0.52799
Dengue / QC	_VTMSVDTSK_	A0A0C4DH34	-0.421278	0.421278	1.03114e-05	1.57466e-05	174	A0A0C4DH34	IGHV4-28	Immunoglobulin heavy variable 4-28	HV428_HUMAN	1	-25.3237	0.746763	Dengue	QC	NaN	NaN	NaN	65.7866	0.0976341
Dengue / QC	_NVVVAC[Carbamidomethyl (C)]ENGLPVHLDQSIFR_	P03950	0.596085	0.596085	1.04337e-05	1.59053e-05	34	P03950	ANG	Angiogenin	ANGI_HUMAN	1	51.1609	1.51161	Dengue	QC	NaN	NaN	NaN	26.4853	0.152719
Dengue / QC	_QSGSEC[Carbamidomethyl (C)]IC[Carbamidomethyl (C)]M[Oxidation (M)]SPEEDC[Carbamidomethyl (C)]SHHSEDLC[Carbamidomethyl (C)]VFDTDSNDYFTSPAC[Carbamidomethyl (C)]K_	P13671	1.11782	1.11782	1.04328e-05	1.59053e-05	28	P13671	C6	Complement component C6	CO6_HUMAN	1	117.018	2.17018	Dengue	QC	NaN	NaN	NaN	16.7419	0.111585
Dengue / QC	_VVWC[Carbamidomethyl (C)]AVGEQELRK_	E7ER44;P02788	1.47842	1.47842	1.05981e-05	1.61151e-05	34	E7ER44;P02788	LTF	Lactotransferrin	E7ER44_HUMAN;TRFL_HUMAN	1	178.644	2.78644	Dengue	QC	NaN	NaN	NaN	21.747	0.27229
Dengue / QC	_IRITDNMFC[Carbamidomethyl (C)]AGYKPDEGK_	P00734	0.55147	0.55147	1.06366e-05	1.61574e-05	112	P00734	F2	Prothrombin	THRB_HUMAN	1	46.5578	1.46558	Dengue	QC	NaN	NaN	NaN	106.078	0.105717
Dengue / QC	_KYSDASDC[Carbamidomethyl (C)]HGEDSQAFC[Carbamidomethyl (C)]EK_	P01023	-0.581496	0.581496	1.08494e-05	1.64474e-05	176	P01023	A2M	Alpha-2-macroglobulin	A2MG_HUMAN	1	-33.1729	0.668271	Dengue	QC	NaN	NaN	NaN	49.6279	0.124573
Dengue / QC	_SIYKPGQTVKFR_	P01023	2.69192	2.69192	1.08915e-05	1.64988e-05	48	P01023	A2M	Alpha-2-macroglobulin	A2MG_HUMAN	1	546.172	6.46172	Dengue	QC	NaN	NaN	NaN	22.4101	0.463242
Dengue / QC	_TIQNDIMLLQLSR_	P08311	1.3755	1.3755	1.08908e-05	1.64988e-05	22	P08311	CTSG	Cathepsin G	CATG_HUMAN	1	159.458	2.59458	Dengue	QC	NaN	NaN	NaN	15.7885	0.283144
Dengue / QC	_LDNIYSSDK_	P04114	0.60053	0.60053	1.09789e-05	1.66228e-05	64	P04114	APOB	Apolipoprotein B-100	APOB_HUMAN	1	51.6274	1.51627	Dengue	QC	NaN	NaN	NaN	44.4055	0.0966765
Dengue / QC	_LPPNVVEESAR_	P01023	-0.420706	0.420706	1.12004e-05	1.69369e-05	176	P01023	A2M	Alpha-2-macroglobulin	A2MG_HUMAN	1	-25.2941	0.747059	Dengue	QC	NaN	NaN	NaN	73.5852	0.0911098
Dengue / QC	_AEAEEDGDLQC[Carbamidomethyl (C)]LC[Carbamidomethyl (C)]VK_	P10720	0.58569	0.58569	1.12431e-05	1.69972e-05	60	P10720	PF4V1	Platelet factor 4 variant	PF4V_HUMAN	1	50.0757	1.50076	Dengue	QC	NaN	NaN	NaN	34.3474	0.146639
Dengue / QC	_TTPPMLDSDGSFFLYSKLTVDKSR_	P01859	1.37948	1.37948	1.12751e-05	1.70413e-05	48	P01859	IGHG2	Immunoglobulin heavy constant gamma 2	IGHG2_HUMAN	1	160.174	2.60174	Dengue	QC	NaN	NaN	NaN	31.7318	0.358947
Dengue / QC	_FPETLMEIEIPIVDHSTC[Carbamidomethyl (C)]QK_	P48740	0.735444	0.735444	1.12871e-05	1.70552e-05	48	P48740	MASP1	Mannan-binding lectin serine protease 1	MASP1_HUMAN	1	66.491	1.66491	Dengue	QC	NaN	NaN	NaN	31.066	0.1451
Dengue / QC	_RQLTPYAQR_	P06727	0.470295	0.470295	1.14038e-05	1.72099e-05	46	P06727	APOA4	Apolipoprotein A-IV	APOA4_HUMAN	1	38.5393	1.38539	Dengue	QC	NaN	NaN	NaN	25.7338	0.115121
Dengue / QC	_AKVQPYLDDFQKK_	P02647	0.323842	0.323842	1.14619e-05	1.72933e-05	144	P02647	APOA1	Apolipoprotein A-I	APOA1_HUMAN	1	25.1659	1.25166	Dengue	QC	NaN	NaN	NaN	78.023	0.0807623
Dengue / QC	_SHC[Carbamidomethyl (C)]IAEVENDEMPADLPSLAADFVESKDVC[Carbamidomethyl (C)]K_	P02768	0.575646	0.575646	1.1478e-05	1.73089e-05	176	P02768	ALB	Serum albumin	ALBU_HUMAN	1	49.0344	1.49034	Dengue	QC	NaN	NaN	NaN	129.009	0.127909
Dengue / QC	_PKNPANPVQR_	P00738	0.838596	0.838596	1.16066e-05	1.74854e-05	50	P00738	HP	Haptoglobin	HPT_HUMAN	1	78.8309	1.78831	Dengue	QC	NaN	NaN	NaN	42.1084	0.222356
Dengue / QC	_QFPFLASIQNQGR_	P20160	1.66684	1.66684	1.16283e-05	1.75136e-05	30	P20160	AZU1	Azurocidin	CAP7_HUMAN	1	217.518	3.17518	Dengue	QC	NaN	NaN	NaN	20.9338	0.300162
Dengue / QC	_NIPGDFEC[Carbamidomethyl (C)]EC[Carbamidomethyl (C)]PEGYR_	P07225	0.392576	0.392576	1.16793e-05	1.75861e-05	120	P07225	PROS1	Vitamin K-dependent protein S	PROS_HUMAN	1	31.2735	1.31273	Dengue	QC	NaN	NaN	NaN	54.3779	0.0845342
Dengue / QC	_SDVM[Oxidation (M)]YTDWKKDK_	P19652	0.993184	0.993184	1.17402e-05	1.7669e-05	40	P19652	ORM2	Alpha-1-acid glycoprotein 2	A1AG2_HUMAN	1	99.0574	1.99057	Dengue	QC	NaN	NaN	NaN	34.8883	0.297245
Dengue / QC	_NQVAMNPTNTVFDAK_	E9PKE3;P11142	0.681821	0.681821	1.17876e-05	1.77358e-05	14	E9PKE3;P11142	HSPA8	Heat shock cognate 71 kDa protein	E9PKE3_HUMAN;HSP7C_HUMAN	1	60.4163	1.60416	Dengue	QC	NaN	NaN	NaN	8.68029	0.140409
Dengue / QC	_NLRENGYEC[Carbamidomethyl (C)]EWR_	P04275	0.608807	0.608807	1.18446e-05	1.78127e-05	72	P04275	VWF	von Willebrand factor	VWF_HUMAN	1	52.4998	1.525	Dengue	QC	NaN	NaN	NaN	55.126	0.197786
Dengue / QC	_YYTYLIMNK_	P01024	-0.304522	0.304522	1.19435e-05	1.79524e-05	170	P01024	C3	Complement C3	CO3_HUMAN	1	-19.0289	0.809711	Dengue	QC	NaN	NaN	NaN	104.62	0.0671356
Dengue / QC	_LVNGQSHISLSKAEFQDALEKLNMGITDLQGLR_	P0C0L5	0.478373	0.478373	1.19894e-05	1.80081e-05	152	P0C0L5	C4B	Complement C4-B	CO4B_HUMAN	1	39.3172	1.39317	Dengue	QC	NaN	NaN	NaN	69.6299	0.109677
Dengue / QC	_SFNRGEC[Carbamidomethyl (C)]_	P01834	0.471132	0.471132	1.20454e-05	1.80831e-05	174	P01834	IGKC	Immunoglobulin kappa constant	IGKC_HUMAN	1	38.6197	1.3862	Dengue	QC	NaN	NaN	NaN	151.235	0.116178
Dengue / QC	_ELSHLPSLYDYSAYRR_	P10643	0.848099	0.848099	1.22133e-05	1.83078e-05	38	P10643	C7	Complement component C7	CO7_HUMAN	1	80.0127	1.80013	Dengue	QC	NaN	NaN	NaN	26.9502	0.146651
Dengue / QC	_QIQVSWLR_	P01871	-0.407688	0.407688	1.23438e-05	1.8485e-05	174	P01871	IGHM	Immunoglobulin heavy constant mu	IGHM_HUMAN	1	-24.6169	0.753831	Dengue	QC	NaN	NaN	NaN	99.5925	0.0835213
Dengue / QC	_YEKPGSPPREVVPR_	P02751;P02751-15;P02751-3;P02751-7	1.06799	1.06799	1.25345e-05	1.87427e-05	40	P02751;P02751-15;P02751-3;P02751-7	FN1	Fibronectin;Isoform 15 of Fibronectin;Isoform 3 of Fibronectin;Isoform 7 of Fibronectin	FINC_HUMAN	1	109.651	2.09651	Dengue	QC	NaN	NaN	NaN	14.5037	0.208714
Dengue / QC	_SRWQQGNIFSC[Carbamidomethyl (C)]SVMHEALHNR_	P01860	0.696079	0.696079	1.30673e-05	1.94765e-05	118	P01860	IGHG3	Immunoglobulin heavy constant gamma 3	IGHG3_HUMAN	1	62.0095	1.6201	Dengue	QC	NaN	NaN	NaN	106.18	0.102538
Dengue / QC	_HPNVFGFC[Carbamidomethyl (C)]R_	P04196	-0.386178	0.386178	1.30962e-05	1.95099e-05	176	P04196	HRG	Histidine-rich glycoprotein	HRG_HUMAN	1	-23.4846	0.765154	Dengue	QC	NaN	NaN	NaN	59.0025	0.0725182
Dengue / QC	_IIALDGDTK_	P29401;P29401-2	2.5547	2.5547	1.31772e-05	1.96209e-05	16	P29401;P29401-2	TKT	Transketolase;Isoform 2 of Transketolase	TKT_HUMAN	1	487.546	5.87546	Dengue	QC	NaN	NaN	NaN	8.14418	0.272802
Dengue / QC	_EDPQTFYYAVAVVKK_	P02787	-0.256282	0.256282	1.32506e-05	1.97108e-05	176	P02787	TF	Serotransferrin	TRFE_HUMAN	1	-16.2757	0.837243	Dengue	QC	NaN	NaN	NaN	86.3436	0.0550771
Dengue / QC	_NPDSSTTGPWC[Carbamidomethyl (C)]YTTDPTVRR_	P00734	0.266554	0.266554	1.32591e-05	1.97185e-05	170	P00734	F2	Prothrombin	THRB_HUMAN	1	20.2931	1.20293	Dengue	QC	NaN	NaN	NaN	113.529	0.0524125
Dengue / QC	_DSFHLDEQFTVPVEM[Oxidation (M)]MQAR_	P08697	0.558629	0.558629	1.33634e-05	1.9854e-05	88	P08697	SERPINF2	Alpha-2-antiplasmin	A2AP_HUMAN	1	47.2869	1.47287	Dengue	QC	NaN	NaN	NaN	70.841	0.0972242
Dengue / QC	_WLQGSQELPREK_	A0A0G2JMB2	-0.545395	0.545395	1.3405e-05	1.9906e-05	174	A0A0G2JMB2	IGHA2	Immunoglobulin heavy constant alpha 2 (Fragment)	A0A0G2JMB2_HUMAN	1	-31.4796	0.685204	Dengue	QC	NaN	NaN	NaN	77.4345	0.116434
Dengue / QC	_LNLVATPLFLKPGIPYPIK_	P01031	0.585257	0.585257	1.34407e-05	1.9954e-05	52	P01031	C5	Complement C5	CO5_HUMAN	1	50.0306	1.50031	Dengue	QC	NaN	NaN	NaN	29.3028	0.135231
Dengue / QC	_SFMLLILER_	P05543	0.469786	0.469786	1.34468e-05	1.99583e-05	76	P05543	SERPINA7	Thyroxine-binding globulin	THBG_HUMAN	1	38.4904	1.3849	Dengue	QC	NaN	NaN	NaN	40.4221	0.183527
Dengue / QC	_TVAAPSVFIFPPSDEQLKSGTASVVC[Carbamidomethyl (C)]LLNNFYPREAK_	P01834	1.27167	1.27167	1.36439e-05	2.02209e-05	118	P01834	IGKC	Immunoglobulin kappa constant	IGKC_HUMAN	1	141.441	2.41441	Dengue	QC	NaN	NaN	NaN	110.374	0.229006
Dengue / QC	_TAGWNIPM[Oxidation (M)]GLLYNKINHC[Carbamidomethyl (C)]RFDEFFSEGC[Carbamidomethyl (C)]APGSK_	P02787	1.88002	1.88002	1.36918e-05	2.02819e-05	150	P02787	TF	Serotransferrin	TRFE_HUMAN	1	268.08	3.6808	Dengue	QC	NaN	NaN	NaN	118.744	0.277371
Dengue / QC	_DVMQGTDEHVVC[Carbamidomethyl (C)]K_	P01871	-0.348647	0.348647	1.37674e-05	2.0374e-05	158	P01871	IGHM	Immunoglobulin heavy constant mu	IGHM_HUMAN	1	-21.468	0.78532	Dengue	QC	NaN	NaN	NaN	76.1442	0.0845761
Dengue / QC	_GLLVGEILSAVLSQEGINILTHLPK_	P01031	1.18494	1.18494	1.38006e-05	2.0418e-05	48	P01031	C5	Complement C5	CO5_HUMAN	1	127.353	2.27353	Dengue	QC	NaN	NaN	NaN	6.98057	0.158439
Dengue / QC	_LLIYKASSLESGVPSR_	P01602	0.294192	0.294192	1.38138e-05	2.04325e-05	66	P01602	IGKV1-5	Immunoglobulin kappa variable 1-5	KV105_HUMAN	1	22.6198	1.2262	Dengue	QC	NaN	NaN	NaN	34.5452	0.45003
Dengue / QC	_EC[Carbamidomethyl (C)]SKLPLRITYYHLSFPTNIQAPAVVFR_	P23142-4	0.866497	0.866497	1.38265e-05	2.0443e-05	84	P23142-4	FBLN1	Isoform C of Fibulin-1	FBLN1_HUMAN	1	82.323	1.82323	Dengue	QC	NaN	NaN	NaN	67.4635	0.173924
Dengue / QC	_IDITLSSVK_	Q08380	0.882244	0.882244	1.38829e-05	2.05196e-05	64	Q08380	LGALS3BP	Galectin-3-binding protein	LG3BP_HUMAN	1	84.324	1.84324	Dengue	QC	NaN	NaN	NaN	45.9139	0.201875
Dengue / QC	_DGTPPIDAHTR_	Q15582	-0.0494716	0.0494716	1.39933e-05	2.06777e-05	20	Q15582	TGFBI	Transforming growth factor-beta-induced protein ig-h3	BGH3_HUMAN	1	-3.37099	0.96629	Dengue	QC	NaN	NaN	NaN	12.8109	0.276613
Dengue / QC	_ISGLIYEETR_	P62805	1.89887	1.89887	1.4009e-05	2.06958e-05	32	P62805	HIST1H4A	Histone H4	H4_HUMAN	1	272.92	3.7292	Dengue	QC	NaN	NaN	NaN	15.1541	0.344359
Dengue / QC	_WDAQIPHQHR_	G3XAK1;P26927	0.872594	0.872594	1.40514e-05	2.07483e-05	22	G3XAK1;P26927	MST1	Hepatocyte growth factor-like protein	G3XAK1_HUMAN;HGFL_HUMAN	1	83.0953	1.83095	Dengue	QC	NaN	NaN	NaN	12.33	0.234798
Dengue / QC	_ITFELVYEELLKR_	Q14624	0.522267	0.522267	1.40651e-05	2.07635e-05	130	Q14624	ITIH4	Inter-alpha-trypsin inhibitor heavy chain H4	ITIH4_HUMAN	1	43.621	1.43621	Dengue	QC	NaN	NaN	NaN	60.9262	0.104118
Dengue / QC	_KLSSWVLLMK_	P01009	-0.333302	0.333302	1.40728e-05	2.07697e-05	164	P01009	SERPINA1	Alpha-1-antitrypsin	A1AT_HUMAN	1	-20.6282	0.793718	Dengue	QC	NaN	NaN	NaN	136.02	0.0785135
Dengue / QC	_WYQMGIVSWGEGC[Carbamidomethyl (C)]DR_	P00734	0.437986	0.437986	1.41954e-05	2.09301e-05	120	P00734	F2	Prothrombin	THRB_HUMAN	1	35.4712	1.35471	Dengue	QC	NaN	NaN	NaN	48.5779	0.115706
Dengue / QC	_DYFMPC[Carbamidomethyl (C)]PGRGHGHR_	P02790	1.13129	1.13129	1.4221e-05	2.09577e-05	88	P02790	HPX	Hemopexin	HEMO_HUMAN	1	119.055	2.19055	Dengue	QC	NaN	NaN	NaN	66.5627	0.205995
Dengue / QC	_IYYNGDKVTYAC[Carbamidomethyl (C)]K_	P05160	1.76045	1.76045	1.43085e-05	2.1066e-05	26	P05160	F13B	Coagulation factor XIII B chain	F13B_HUMAN	1	238.803	3.38803	Dengue	QC	NaN	NaN	NaN	21.3957	0.244338
Dengue / QC	_GSSTWLTAFVLK_	P0C0L5	2.53033	2.53033	1.43733e-05	2.11511e-05	18	P0C0L5	C4B	Complement C4-B	CO4B_HUMAN	1	477.704	5.77704	Dengue	QC	NaN	NaN	NaN	12.2783	0.262665
Dengue / QC	_EEMTKNQVSLTC[Carbamidomethyl (C)]LVK_	P01860	0.668081	0.668081	1.46221e-05	2.14804e-05	174	P01860	IGHG3	Immunoglobulin heavy constant gamma 3	IGHG3_HUMAN	1	58.8958	1.58896	Dengue	QC	NaN	NaN	NaN	159.467	0.132327
Dengue / QC	_ALWEKPFISSR_	P29622	0.180978	0.180978	1.4689e-05	2.15734e-05	92	P29622	SERPINA4	Kallistatin	KAIN_HUMAN	1	13.3652	1.13365	Dengue	QC	NaN	NaN	NaN	36.0776	0.0761827
Dengue / QC	_ADLSGITGAR_	P01011	-0.332873	0.332873	1.48184e-05	2.17529e-05	176	P01011	SERPINA3	Alpha-1-antichymotrypsin	AACT_HUMAN	1	-20.6046	0.793954	Dengue	QC	NaN	NaN	NaN	69.2092	0.0833267
Dengue / QC	_VGSQYRLEDSVTYHC[Carbamidomethyl (C)]SR_	B4E1Z4	1.24686	1.24686	1.51868e-05	2.2272e-05	136	B4E1Z4	NaN	cDNA FLJ55673, highly similar to Complement factor B (EC 3.4.21.47)	B4E1Z4_HUMAN	1	137.325	2.37325	Dengue	QC	NaN	NaN	NaN	120.581	0.236683
Dengue / QC	_VDFTLSSER_	P0C0L5	-0.308647	0.308647	1.52063e-05	2.22952e-05	174	P0C0L5	C4B	Complement C4-B	CO4B_HUMAN	1	-19.2601	0.807399	Dengue	QC	NaN	NaN	NaN	99.3082	0.0680128
Dengue / QC	_AYSDMREANYIGSDK_	P0DJI8	0.931125	0.931125	1.52717e-05	2.23747e-05	50	P0DJI8	SAA1	Serum amyloid A-1 protein	SAA1_HUMAN	1	90.6762	1.90676	Dengue	QC	NaN	NaN	NaN	43.0913	0.19397
Dengue / QC	_VLSPADKTNVK_	P69905	0.655451	0.655451	1.541e-05	2.25664e-05	174	P69905	HBA1	Hemoglobin subunit alpha	HBA_HUMAN	1	57.5109	1.57511	Dengue	QC	NaN	NaN	NaN	153.08	0.154882
Dengue / QC	_PAGLPEKY_	P0DJI8	1.22476	1.22476	1.55406e-05	2.27521e-05	54	P0DJI8	SAA1	Serum amyloid A-1 protein	SAA1_HUMAN	1	133.716	2.33716	Dengue	QC	NaN	NaN	NaN	28.5434	0.236658
Dengue / QC	_LGQYASPTAKR_	P0C0L5	0.989078	0.989078	1.57176e-05	2.30001e-05	174	P0C0L5	C4B	Complement C4-B	CO4B_HUMAN	1	98.4916	1.98492	Dengue	QC	NaN	NaN	NaN	147.395	0.171533
Dengue / QC	_VASYAAWIDSVLA_	K7ERG9;P00746	0.764488	0.764488	1.58847e-05	2.32051e-05	136	K7ERG9;P00746	CFD	Complement factor D	K7ERG9_HUMAN;CFAD_HUMAN	1	69.8768	1.69877	Dengue	QC	NaN	NaN	NaN	127.005	0.155963
Dengue / QC	_EIFRWPESPK_	A0A0A0MS09;P01880;P01880-2	0.780577	0.780577	1.59461e-05	2.32836e-05	128	A0A0A0MS09;P01880;P01880-2	IGHD	Immunoglobulin heavy constant delta (Fragment);Immunoglobulin heavy constant delta;Isoform 2 of Immunoglobulin heavy constant delta	A0A0A0MS09_HUMAN;IGHD_HUMAN;IGHD_HUMAN	1	71.7818	1.71782	Dengue	QC	NaN	NaN	NaN	109.112	0.146435
Dengue / QC	_SPC[Carbamidomethyl (C)]YGYQWVSEEHEEAHHTAYLVFSPSK_	P01023	-0.54208	0.54208	1.60036e-05	2.33562e-05	172	P01023	A2M	Alpha-2-macroglobulin	A2MG_HUMAN	1	-31.322	0.68678	Dengue	QC	NaN	NaN	NaN	58.8535	0.112576
Dengue / QC	_FSGVPDRFSGSGSGTDFTLK_	A0A075B6S2;A2NJV5	0.57008	0.57008	1.61658e-05	2.35757e-05	160	A0A075B6S2;A2NJV5	IGKV2D-29;IGKV2-29	Immunoglobulin kappa variable 2D-29;Immunoglobulin kappa variable 2-29	KVD29_HUMAN;KV229_HUMAN	1	48.4606	1.48461	Dengue	QC	NaN	NaN	NaN	140.59	0.114272
Dengue / QC	_AAFTEC[Carbamidomethyl (C)]C[Carbamidomethyl (C)]QAADK_	P02768	-0.451306	0.451306	1.62474e-05	2.36834e-05	176	P02768	ALB	Serum albumin	ALBU_HUMAN	1	-26.8619	0.731381	Dengue	QC	NaN	NaN	NaN	66.8691	0.0975009
Dengue / QC	_SLAPYAQDTQEK_	P06727	0.461738	0.461738	1.62772e-05	2.3721e-05	114	P06727	APOA4	Apolipoprotein A-IV	APOA4_HUMAN	1	37.72	1.3772	Dengue	QC	NaN	NaN	NaN	106.982	0.0943933
Dengue / QC	_VTITADESTSTAYMELSSLR_	A0A0B4J2H0	1.10692	1.10692	1.6306e-05	2.37573e-05	110	A0A0B4J2H0	IGHV1-69D	Immunoglobulin heavy variable 1-69D	HV69D_HUMAN	1	115.385	2.15385	Dengue	QC	NaN	NaN	NaN	84.8151	0.231894
Dengue / QC	_TGESVEFVC[Carbamidomethyl (C)]K_	P08603	0.452283	0.452283	1.6342e-05	2.37925e-05	176	P08603	CFH	Complement factor H	CFAH_HUMAN	1	36.8204	1.3682	Dengue	QC	NaN	NaN	NaN	103.593	0.0830242
Dengue / QC	_TVAAPSVFIFPPSDEQLKSGTASVVC[Carbamidomethyl (C)]LLNNFYPR_	P01834	0.468541	0.468541	1.64056e-05	2.38792e-05	176	P01834	IGKC	Immunoglobulin kappa constant	IGKC_HUMAN	1	38.3709	1.38371	Dengue	QC	NaN	NaN	NaN	78.3839	0.123717
Dengue / QC	_YKEENDDFASFR_	P04196	-0.231646	0.231646	1.64611e-05	2.39543e-05	176	P04196	HRG	Histidine-rich glycoprotein	HRG_HUMAN	1	-14.8337	0.851663	Dengue	QC	NaN	NaN	NaN	70.9398	0.0559913
Dengue / QC	_FSGSLLGGK_	P04211	-0.430796	0.430796	1.65287e-05	2.40352e-05	176	P04211	IGLV7-43	Immunoglobulin lambda variable 7-43	LV743_HUMAN	1	-25.8147	0.741853	Dengue	QC	NaN	NaN	NaN	66.1405	0.0912172
Dengue / QC	_C[Carbamidomethyl (C)]PLLVDSEGWVK_	P01833	1.55931	1.55931	1.67264e-05	2.42862e-05	32	P01833	PIGR	Polymeric immunoglobulin receptor	PIGR_HUMAN	1	194.712	2.94712	Dengue	QC	NaN	NaN	NaN	23.0279	0.374673
Dengue / QC	_ILGGHLDAK_	P00738	-0.664008	0.664008	1.686e-05	2.44697e-05	176	P00738	HP	Haptoglobin	HPT_HUMAN	1	-36.8878	0.631122	Dengue	QC	NaN	NaN	NaN	50.8644	0.162656
Dengue / QC	_C[Carbamidomethyl (C)]EDGKWTEPPKC[Carbamidomethyl (C)]IEGQEK_	P05160	0.417979	0.417979	1.69924e-05	2.46426e-05	104	P05160	F13B	Coagulation factor XIII B chain	F13B_HUMAN	1	33.6055	1.33605	Dengue	QC	NaN	NaN	NaN	54.631	0.0930551
Dengue / QC	_GEVKYPLC[Carbamidomethyl (C)]TR_	P05160	0.459444	0.459444	1.71403e-05	2.48466e-05	78	P05160	F13B	Coagulation factor XIII B chain	F13B_HUMAN	1	37.5012	1.37501	Dengue	QC	NaN	NaN	NaN	46.3568	0.159144
Dengue / QC	_FFSASC[Carbamidomethyl (C)]VPGADKGQFPNLC[Carbamidomethyl (C)]R_	E7ER44;P02788	1.25977	1.25977	1.75299e-05	2.53383e-05	44	E7ER44;P02788	LTF	Lactotransferrin	E7ER44_HUMAN;TRFL_HUMAN	1	139.458	2.39458	Dengue	QC	NaN	NaN	NaN	25.8518	0.265516
Dengue / QC	_IEDLPTMVTLGNSFLHK_	P04275	0.385694	0.385694	1.79253e-05	2.58601e-05	124	P04275	VWF	von Willebrand factor	VWF_HUMAN	1	30.6488	1.30649	Dengue	QC	NaN	NaN	NaN	118.72	0.113687
Dengue / QC	_LSQLSVTDVTTSSLR_	A0A087X0I0;A0A140T8Y3;A0A140T8Z8;A0A140TA52;P22105;P22105-3;P22105-4	0.383902	0.383902	1.79243e-05	2.58601e-05	88	A0A087X0I0;A0A140T8Y3;A0A140T8Z8;A0A140TA52;P22105;P22105-3;P22105-4	TNXB	Tenascin-X;Tenascin-X;Tenascin-X (Fragment);Tenascin-X;Tenascin-X;Isoform 4 of Tenascin-X;Isoform 5 of Tenascin-X	A0A087X0I0_HUMAN;A0A140T8Y3_HUMAN;A0A140T8Z8_HUMAN;A0A140TA52_HUMAN;TENX_HUMAN;TENX_HUMAN;TENX_HUMAN	1	30.4867	1.30487	Dengue	QC	NaN	NaN	NaN	65.6955	0.118372
Dengue / QC	_TC[Carbamidomethyl (C)]RVEC[Carbamidomethyl (C)]SDNLFTQR_	P48740	1.48527	1.48527	1.80817e-05	2.60484e-05	22	P48740	MASP1	Mannan-binding lectin serine protease 1	MASP1_HUMAN	1	179.97	2.7997	Dengue	QC	NaN	NaN	NaN	14.9317	0.406875
Dengue / QC	_VSSFLPWIR_	P08311	0.716546	0.716546	1.8264e-05	2.62859e-05	66	P08311	CTSG	Cathepsin G	CATG_HUMAN	1	64.3243	1.64324	Dengue	QC	NaN	NaN	NaN	35.2799	0.251872
Dengue / QC	_IWDVVEK_	P01024	-0.266227	0.266227	1.85935e-05	2.67281e-05	176	P01024	C3	Complement C3	CO3_HUMAN	1	-16.8508	0.831492	Dengue	QC	NaN	NaN	NaN	57.9732	0.0578295
Dengue / QC	_IQTHSTTYR_	P05160	0.684753	0.684753	1.86089e-05	2.67438e-05	128	P05160	F13B	Coagulation factor XIII B chain	F13B_HUMAN	1	60.7427	1.60743	Dengue	QC	NaN	NaN	NaN	47.9566	0.143027
Dengue / QC	_YVVVSHTAGSSC[Carbamidomethyl (C)]NTPASC[Carbamidomethyl (C)]QQQAR_	O75594	1.27365	1.27365	1.94435e-05	2.78619e-05	26	O75594	PGLYRP1	Peptidoglycan recognition protein 1	PGRP1_HUMAN	1	141.773	2.41773	Dengue	QC	NaN	NaN	NaN	15.0218	0.27653
Dengue / QC	_YNILPEKEDSPFALK_	P20742	1.75363	1.75363	1.95075e-05	2.79249e-05	126	P20742	PZP	Pregnancy zone protein	PZP_HUMAN	1	237.206	3.37206	Dengue	QC	NaN	NaN	NaN	84.6072	0.338703
Dengue / QC	_QTLSWTVTPK_	P20742	2.25983	2.25983	1.97165e-05	2.81878e-05	100	P20742	PZP	Pregnancy zone protein	PZP_HUMAN	1	378.936	4.78936	Dengue	QC	NaN	NaN	NaN	49.1271	0.717981
Dengue / QC	_VNEPSILEMSR_	O14791;O14791-2	-0.26684	0.26684	1.97627e-05	2.82405e-05	176	O14791;O14791-2	APOL1	Apolipoprotein L1;Isoform 2 of Apolipoprotein L1	APOL1_HUMAN	1	-16.8862	0.831138	Dengue	QC	NaN	NaN	NaN	92.9222	0.0593941
Dengue / QC	_M[Oxidation (M)]GVSWIR_	A0A0B4J1V2	0.362132	0.362132	2.05896e-05	2.93594e-05	18	A0A0B4J1V2	IGHV2-26	Immunoglobulin heavy variable 2-26	HV226_HUMAN	1	28.5324	1.28532	Dengue	QC	NaN	NaN	NaN	7.75264	0.415347
Dengue / QC	_DLSEAHFAPC[Carbamidomethyl (C)]_	P35858;P35858-2	0.662178	0.662178	2.06053e-05	2.93741e-05	102	P35858;P35858-2	IGFALS	Insulin-like growth factor-binding protein complex acid labile subunit;Isoform 2 of Insulin-like growth factor-binding protein complex acid labile subunit	ALS_HUMAN	1	58.247	1.58247	Dengue	QC	NaN	NaN	NaN	25.0799	0.113591
Dengue / QC	_M[Oxidation (M)]NFRPGVLSSR_	Q14624	2.97994	2.97994	2.06096e-05	2.93741e-05	100	Q14624	ITIH4	Inter-alpha-trypsin inhibitor heavy chain H4	ITIH4_HUMAN	1	688.953	7.88953	Dengue	QC	NaN	NaN	NaN	55.1567	0.254434
Dengue / QC	_ASEQAELPR_	Q86UD1	0.490504	0.490504	2.06398e-05	2.94032e-05	76	Q86UD1	OAF	Out at first protein homolog	OAF_HUMAN	1	40.4936	1.40494	Dengue	QC	NaN	NaN	NaN	65.0269	0.131185
Dengue / QC	_VLADKFIIPGLK_	P04114	0.114948	0.114948	2.06894e-05	2.94599e-05	70	P04114	APOB	Apolipoprotein B-100	APOB_HUMAN	1	8.29364	1.08294	Dengue	QC	NaN	NaN	NaN	52.6434	0.0858226
Dengue / QC	_NTLELSNGVIVK_	P04114	0.417257	0.417257	2.07716e-05	2.957e-05	112	P04114	APOB	Apolipoprotein B-100	APOB_HUMAN	1	33.5386	1.33539	Dengue	QC	NaN	NaN	NaN	88.4121	0.104278
Dengue / QC	_APKLLIYAASTLQSGVPSR_	A0A0C4DH67	1.67791	1.67791	2.08839e-05	2.97159e-05	32	A0A0C4DH67	IGKV1-8	Immunoglobulin kappa variable 1-8	KV108_HUMAN	1	219.963	3.19963	Dengue	QC	NaN	NaN	NaN	12.8264	0.727794
Dengue / QC	_GYTQQLAFRQPSSAFAAFVKR_	P01024	-0.416319	0.416319	2.09963e-05	2.98616e-05	174	P01024	C3	Complement C3	CO3_HUMAN	1	-25.0666	0.749334	Dengue	QC	NaN	NaN	NaN	63.8249	0.0808217
Dengue / QC	_TC[Carbamidomethyl (C)]QSLHINEMC[Carbamidomethyl (C)]QER_	P04275	2.24485	2.24485	2.11562e-05	3.00465e-05	36	P04275	VWF	von Willebrand factor	VWF_HUMAN	1	373.987	4.73987	Dengue	QC	NaN	NaN	NaN	27.6494	0.386358
Dengue / QC	_AGFSWIEVTFKNPLVWVHASPEHVVVTR_	Q14624	0.604371	0.604371	2.13515e-05	3.02953e-05	162	Q14624	ITIH4	Inter-alpha-trypsin inhibitor heavy chain H4	ITIH4_HUMAN	1	52.0316	1.52032	Dengue	QC	NaN	NaN	NaN	85.4133	0.13396
Dengue / QC	_DIPQPHAEPWAFSLDLGLK_	I3L145;P04278	0.913989	0.913989	2.15573e-05	3.05585e-05	112	I3L145;P04278	SHBG	Sex hormone-binding globulin	I3L145_HUMAN;SHBG_HUMAN	1	88.4249	1.88425	Dengue	QC	NaN	NaN	NaN	95.9842	0.162619
Dengue / QC	_LRLEPLK_	P04114	0.755648	0.755648	2.16039e-05	3.06174e-05	30	P04114	APOB	Apolipoprotein B-100	APOB_HUMAN	1	68.839	1.68839	Dengue	QC	NaN	NaN	NaN	13.6421	0.150675
Dengue / QC	_KLSFYYLIMAKGGIVR_	P01023	0.567278	0.567278	2.16718e-05	3.06992e-05	40	P01023	A2M	Alpha-2-macroglobulin	A2MG_HUMAN	1	48.1726	1.48173	Dengue	QC	NaN	NaN	NaN	24.0639	0.250781
Dengue / QC	_QVC[Carbamidomethyl (C)]TDINEC[Carbamidomethyl (C)]ETGQHNC[Carbamidomethyl (C)]VPNSVC[Carbamidomethyl (C)]INTR_	G3XAP6;P49747	0.778467	0.778467	2.17607e-05	3.08106e-05	42	G3XAP6;P49747	COMP	Cartilage oligomeric matrix protein	G3XAP6_HUMAN;COMP_HUMAN	1	71.5308	1.71531	Dengue	QC	NaN	NaN	NaN	29.7357	0.208115
Dengue / QC	_ILLQGTPVAQM[Oxidation (M)]TEDAVDAER_	P01024	-0.458899	0.458899	2.21119e-05	3.12931e-05	172	P01024	C3	Complement C3	CO3_HUMAN	1	-27.2459	0.727541	Dengue	QC	NaN	NaN	NaN	44.8325	0.116737
Dengue / QC	_DSLEFREIGELYLPK_	P01011	0.967955	0.967955	2.21663e-05	3.13628e-05	58	P01011	SERPINA3	Alpha-1-antichymotrypsin	AACT_HUMAN	1	95.6066	1.95607	Dengue	QC	NaN	NaN	NaN	39.415	0.153632
Dengue / QC	_KSISAALEHKVSALLTPAEQTGTWK_	P04114	1.3663	1.3663	2.24397e-05	3.17347e-05	44	P04114	APOB	Apolipoprotein B-100	APOB_HUMAN	1	157.808	2.57808	Dengue	QC	NaN	NaN	NaN	18.7215	0.255701
Dengue / QC	_MVETTAYALLTSLNLK_	P01031	0.505793	0.505793	2.31906e-05	3.27352e-05	98	P01031	C5	Complement C5	CO5_HUMAN	1	41.9903	1.4199	Dengue	QC	NaN	NaN	NaN	58.7087	0.158554
Dengue / QC	_SLHTLFGDK_	P02768	-0.332156	0.332156	2.33418e-05	3.29333e-05	176	P02768	ALB	Serum albumin	ALBU_HUMAN	1	-20.5651	0.794349	Dengue	QC	NaN	NaN	NaN	81.0999	0.075734
Dengue / QC	_DTANLFPQTSLTLHMWPDTEGTFNVEC[Carbamidomethyl (C)]LTTDHYTGGMK_	P00450	0.557773	0.557773	2.36108e-05	3.32737e-05	140	P00450	CP	Ceruloplasmin	CERU_HUMAN	1	47.1995	1.472	Dengue	QC	NaN	NaN	NaN	60.5559	0.106152
Dengue / QC	_TQFNNNEYSQDLDAYNTKDKIGVELTGR_	P04114	0.529549	0.529549	2.3836e-05	3.35285e-05	148	P04114	APOB	Apolipoprotein B-100	APOB_HUMAN	1	44.3478	1.44348	Dengue	QC	NaN	NaN	NaN	129.206	0.14469
Dengue / QC	_C[Carbamidomethyl (C)]KVSNKALPAPIEK_	P01857	1.59397	1.59397	2.42874e-05	3.40918e-05	28	P01857	IGHG1	Immunoglobulin heavy constant gamma 1	IGHG1_HUMAN	1	201.879	3.01879	Dengue	QC	NaN	NaN	NaN	21.9751	0.292792
Dengue / QC	_YFKPGM[Oxidation (M)]PFDLM[Oxidation (M)]VFVTNPDGSPAYRVPVAVQGEDTVQSLTQGDGVAK_	P01024	1.30298	1.30298	2.45234e-05	3.4399e-05	110	P01024	C3	Complement C3	CO3_HUMAN	1	146.739	2.46739	Dengue	QC	NaN	NaN	NaN	44.024	0.568707
Dengue / QC	_EGVYTVFAPTNEAFR_	Q15582	0.678389	0.678389	2.4601e-05	3.44837e-05	48	Q15582	TGFBI	Transforming growth factor-beta-induced protein ig-h3	BGH3_HUMAN	1	60.0351	1.60035	Dengue	QC	NaN	NaN	NaN	38.234	0.152249
Dengue / QC	_IIGGSDADIK_	P09871	0.431134	0.431134	2.46112e-05	3.449e-05	66	P09871	C1S	Complement C1s subcomponent	C1S_HUMAN	1	34.8293	1.34829	Dengue	QC	NaN	NaN	NaN	35.0521	0.178377
Dengue / QC	_EVTKEVVTSEDGSDC[Carbamidomethyl (C)]PEAMDLGTLSGIGTLDGFR_	P02671	2.61203	2.61203	2.48586e-05	3.47962e-05	68	P02671	FGA	Fibrinogen alpha chain	FIBA_HUMAN	1	511.363	6.11363	Dengue	QC	NaN	NaN	NaN	50.497	0.415038
Dengue / QC	_SNLISGSVMYIEEK_	Q9UHG3	0.43093	0.43093	2.53408e-05	3.54137e-05	42	Q9UHG3	PCYOX1	Prenylcysteine oxidase 1	PCYOX_HUMAN	1	34.8102	1.3481	Dengue	QC	NaN	NaN	NaN	28.1185	0.110135
Dengue / QC	_TPENYPNAGLTM[Oxidation (M)]NYC[Carbamidomethyl (C)]RNPDADKGPWC[Carbamidomethyl (C)]FTTDPSVR_	P00747	1.54264	1.54264	2.54205e-05	3.55169e-05	24	P00747	PLG	Plasminogen	PLMN_HUMAN	1	191.326	2.91326	Dengue	QC	NaN	NaN	NaN	15.1602	0.27571
Dengue / QC	_KLISVDTEHSNIYLQNGPDRIGR_	P00450	0.899542	0.899542	2.54312e-05	3.55236e-05	120	P00450	CP	Ceruloplasmin	CERU_HUMAN	1	86.5473	1.86547	Dengue	QC	NaN	NaN	NaN	70.6858	0.135556
Dengue / QC	_LADFALLC[Carbamidomethyl (C)]LDGK_	E7ER44;P02788	0.937795	0.937795	2.54772e-05	3.55795e-05	62	E7ER44;P02788	LTF	Lactotransferrin	E7ER44_HUMAN;TRFL_HUMAN	1	91.5598	1.9156	Dengue	QC	NaN	NaN	NaN	47.9297	0.228297
Dengue / QC	_YLYEIARR_	P02768	-0.347834	0.347834	2.56314e-05	3.577e-05	176	P02768	ALB	Serum albumin	ALBU_HUMAN	1	-21.4237	0.785763	Dengue	QC	NaN	NaN	NaN	44.5504	0.0787948
Dengue / QC	_QPSSAFAAFVKR_	P01024	-0.470295	0.470295	2.56828e-05	3.58251e-05	174	P01024	C3	Complement C3	CO3_HUMAN	1	-27.8183	0.721817	Dengue	QC	NaN	NaN	NaN	55.9376	0.106192
Dengue / QC	_SC[Carbamidomethyl (C)]HLAMAPNHAVVSR_	E7ER44;P02788	1.31816	1.31816	2.58127e-05	3.59897e-05	30	E7ER44;P02788	LTF	Lactotransferrin	E7ER44_HUMAN;TRFL_HUMAN	1	149.348	2.49348	Dengue	QC	NaN	NaN	NaN	23.9623	0.28631
Dengue / QC	_YFKPGMPFDLMVFVTNPDGSPAYRVPVAVQGEDTVQSLTQGDGVAK_	P01024	0.558293	0.558293	2.62616e-05	3.65479e-05	174	P01024	C3	Complement C3	CO3_HUMAN	1	47.2526	1.47253	Dengue	QC	NaN	NaN	NaN	54.065	0.112299
Dengue / QC	_ANTVQEATFQMELPK_	Q14624	-0.401098	0.401098	2.62695e-05	3.65505e-05	174	Q14624	ITIH4	Inter-alpha-trypsin inhibitor heavy chain H4	ITIH4_HUMAN	1	-24.2718	0.757282	Dengue	QC	NaN	NaN	NaN	50.653	0.0764133
Dengue / QC	_AFQYHSK_	P00747	0.668934	0.668934	2.62946e-05	3.65769e-05	112	P00747	PLG	Plasminogen	PLMN_HUMAN	1	58.9898	1.5899	Dengue	QC	NaN	NaN	NaN	41.8003	0.214157
Dengue / QC	_LFGEVTSPLFPKPYPNNFETTTVITVPTGYR_	B4DPQ0	0.493574	0.493574	2.64418e-05	3.67393e-05	134	B4DPQ0	C1R	Complement C1r subcomponent	B4DPQ0_HUMAN	1	40.7929	1.40793	Dengue	QC	NaN	NaN	NaN	105.347	0.0958126
Dengue / QC	_ESGPVLVKPTETLTLTC[Carbamidomethyl (C)]TVSGFSLSNAR_	A0A0B4J1V2	0.636716	0.636716	2.64789e-05	3.67823e-05	88	A0A0B4J1V2	IGHV2-26	Immunoglobulin heavy variable 2-26	HV226_HUMAN	1	55.4786	1.55479	Dengue	QC	NaN	NaN	NaN	77.3014	0.168524
Dengue / QC	_KLISVDTEHSNIYLQNGPDR_	P00450	-0.372305	0.372305	2.65371e-05	3.6823e-05	176	P00450	CP	Ceruloplasmin	CERU_HUMAN	1	-22.7453	0.772547	Dengue	QC	NaN	NaN	NaN	49.2816	0.089489
Dengue / QC	_MFPGVPLDTHDVFQYR_	P14780	2.44347	2.44347	2.65473e-05	3.68264e-05	18	P14780	MMP9	Matrix metalloproteinase-9	MMP9_HUMAN	1	443.95	5.4395	Dengue	QC	NaN	NaN	NaN	9.2774	0.353001
Dengue / QC	_ADVKGHGATNDLTFTEEVDMKEMEK_	Q06033;Q06033-2	1.65341	1.65341	2.67493e-05	3.7081e-05	30	Q06033;Q06033-2	ITIH3	Inter-alpha-trypsin inhibitor heavy chain H3;Isoform 2 of Inter-alpha-trypsin inhibitor heavy chain H3	ITIH3_HUMAN	1	214.575	3.14575	Dengue	QC	NaN	NaN	NaN	17.6056	0.264331
Dengue / QC	_GISEQSLVVSGVQHQSTLELSEVGVEAAAATSIAMSR_	P08697	0.719553	0.719553	2.7162e-05	3.76272e-05	80	P08697	SERPINF2	Alpha-2-antiplasmin	A2AP_HUMAN	1	64.6672	1.64667	Dengue	QC	NaN	NaN	NaN	40.6893	0.125875
Dengue / QC	_GHVLFRPTVSQQQSC[Carbamidomethyl (C)]PTC[Carbamidomethyl (C)]STSLLNGHFK_	P19827	0.777487	0.777487	2.73673e-05	3.78594e-05	22	P19827	ITIH1	Inter-alpha-trypsin inhibitor heavy chain H1	ITIH1_HUMAN	1	71.4143	1.71414	Dengue	QC	NaN	NaN	NaN	17.2959	0.126762
Dengue / QC	_EGTC[Carbamidomethyl (C)]PEAPTDEC[Carbamidomethyl (C)]K_	P02787	0.714735	0.714735	2.74679e-05	3.79898e-05	38	P02787	TF	Serotransferrin	TRFE_HUMAN	1	64.1182	1.64118	Dengue	QC	NaN	NaN	NaN	27.227	0.11804
Dengue / QC	_SC[Carbamidomethyl (C)]GLHQLLRGPEVQLVAHSPWLKDSLSR_	P0C0L5	0.711323	0.711323	2.75877e-05	3.81204e-05	176	P0C0L5	C4B	Complement C4-B	CO4B_HUMAN	1	63.7305	1.6373	Dengue	QC	NaN	NaN	NaN	147.879	0.142221
Dengue / QC	_TVAAPSVFIFPPSDEQLK_	P01834	-0.520685	0.520685	2.76763e-05	3.82255e-05	176	P01834	IGKC	Immunoglobulin kappa constant	IGKC_HUMAN	1	-30.2959	0.697041	Dengue	QC	NaN	NaN	NaN	63.7312	0.103866
Dengue / QC	_ASQSISSYLNWYQQK_	P01597;P04432	1.08718	1.08718	2.77796e-05	3.83593e-05	34	P01597;P04432	IGKV1-39;IGKV1D-39	Immunoglobulin kappa variable 1-39;Immunoglobulin kappa variable 1D-39	KV139_HUMAN;KVD39_HUMAN	1	112.459	2.12459	Dengue	QC	NaN	NaN	NaN	25.8522	0.210948
Dengue / QC	_LDVPVWDVEATLNFLK_	O00391	0.536712	0.536712	2.82921e-05	3.90222e-05	62	O00391	QSOX1	Sulfhydryl oxidase 1	QSOX1_HUMAN	1	45.0662	1.45066	Dengue	QC	NaN	NaN	NaN	9.73416	0.174401
Dengue / QC	_VSGYTFTDYYMHWVQQAPGK_	A0A0G2JMI3	1.52827	1.52827	2.83359e-05	3.90737e-05	40	A0A0G2JMI3	IGHV1-69-2	Immunoglobulin heavy variable 1-69-2	HV692_HUMAN	1	188.44	2.8844	Dengue	QC	NaN	NaN	NaN	21.3453	0.332199
Dengue / QC	_DKSKEFQLFSSPHGK_	P02787	-0.45523	0.45523	2.83608e-05	3.90991e-05	170	P02787	TF	Serotransferrin	TRFE_HUMAN	1	-27.0606	0.729394	Dengue	QC	NaN	NaN	NaN	53.967	0.119612
Dengue / QC	_GSFALSFPVESDVAPIAR_	P20742	1.18712	1.18712	2.84809e-05	3.92377e-05	128	P20742	PZP	Pregnancy zone protein	PZP_HUMAN	1	127.698	2.27698	Dengue	QC	NaN	NaN	NaN	93.497	0.276155
Dengue / QC	_RDTANLFPQTSLTLHM[Oxidation (M)]WPDTEGTFNVEC[Carbamidomethyl (C)]LTTDHYTGGMK_	P00450	-0.0336627	0.0336627	2.8516e-05	3.92701e-05	62	P00450	CP	Ceruloplasmin	CERU_HUMAN	1	-2.30631	0.976937	Dengue	QC	NaN	NaN	NaN	41.3177	0.150861
Dengue / QC	_GM[Oxidation (M)]ADQDGLKPTIDKPSEDSPPLEMLGPR_	P19827	1.26217	1.26217	2.85309e-05	3.92797e-05	174	P19827	ITIH1	Inter-alpha-trypsin inhibitor heavy chain H1	ITIH1_HUMAN	1	139.856	2.39856	Dengue	QC	NaN	NaN	NaN	127.662	0.17529
Dengue / QC	_WLGRYYC[Carbamidomethyl (C)]FQGNQFLR_	P02790	0.252471	0.252471	2.85556e-05	3.92958e-05	154	P02790	HPX	Hemopexin	HEMO_HUMAN	1	19.1245	1.19125	Dengue	QC	NaN	NaN	NaN	89.2913	0.0557813
Dengue / QC	_HQQTVTIPPKSSLSVPYVIVPLK_	P01024	1.23884	1.23884	2.86911e-05	3.94731e-05	40	P01024	C3	Complement C3	CO3_HUMAN	1	136.008	2.36008	Dengue	QC	NaN	NaN	NaN	32.8011	0.215799
Dengue / QC	_QAPGQGLEWMGWINTNTGNPTYAQGFTGR_	A0A0J9YVY3	2.27513	2.27513	2.88703e-05	3.97107e-05	16	A0A0J9YVY3	IGHV7-4-1	Immunoglobulin heavy variable 7-4-1	HV741_HUMAN	1	384.042	4.84042	Dengue	QC	NaN	NaN	NaN	9.81424	0.270648
Dengue / QC	_SNLC[Carbamidomethyl (C)]ALC[Carbamidomethyl (C)]IGDEQGENK_	E7ER44;P02788	0.887728	0.887728	2.8883e-05	3.97191e-05	62	E7ER44;P02788	LTF	Lactotransferrin	E7ER44_HUMAN;TRFL_HUMAN	1	85.026	1.85026	Dengue	QC	NaN	NaN	NaN	48.1337	0.200242
Dengue / QC	_LLIYAASSLQSGVPSR_	A0A0C4DH72	-0.665401	0.665401	2.8964e-05	3.98214e-05	172	A0A0C4DH72	IGKV1-6	Immunoglobulin kappa variable 1-6	KV106_HUMAN	1	-36.9487	0.630513	Dengue	QC	NaN	NaN	NaN	73.3663	0.120415
Dengue / QC	_MESLGITSR_	P07357	-0.260464	0.260464	2.90723e-05	3.99157e-05	176	P07357	C8A	Complement component C8 alpha chain	CO8A_HUMAN	1	-16.518	0.83482	Dengue	QC	NaN	NaN	NaN	61.9912	0.0607892
Dengue / QC	_SC[Carbamidomethyl (C)]DVESNPGIFLPPGTQAEFNLR_	I3L145;P04278	0.973506	0.973506	2.94577e-05	4.03896e-05	78	I3L145;P04278	SHBG	Sex hormone-binding globulin	I3L145_HUMAN;SHBG_HUMAN	1	96.3607	1.96361	Dengue	QC	NaN	NaN	NaN	40.404	0.17366
Dengue / QC	_ELRYDSTC[Carbamidomethyl (C)]ER_	P07357	1.72598	1.72598	2.94548e-05	4.03896e-05	40	P07357	C8A	Complement component C8 alpha chain	CO8A_HUMAN	1	230.804	3.30804	Dengue	QC	NaN	NaN	NaN	27.492	0.32147
Dengue / QC	_LKSEC[Carbamidomethyl (C)]FSKR_	O75882;O75882-2	1.93849	1.93849	2.94943e-05	4.04305e-05	14	O75882;O75882-2	ATRN	Attractin;Isoform 2 of Attractin	ATRN_HUMAN	1	283.304	3.83304	Dengue	QC	NaN	NaN	NaN	8.55191	0.389681
Dengue / QC	_SGTHTLPVESGDMK_	P20742	2.91044	2.91044	2.96267e-05	4.05935e-05	98	P20742	PZP	Pregnancy zone protein	PZP_HUMAN	1	651.847	7.51847	Dengue	QC	NaN	NaN	NaN	66.5148	0.632293
Dengue / QC	_ADSSPVKAGVETTTPSKQSNNK_	P0DOY2	2.18161	2.18161	2.96905e-05	4.06625e-05	98	P0DOY2	IGLC2	Immunoglobulin lambda constant 2	IGLC2_HUMAN	1	353.661	4.53661	Dengue	QC	NaN	NaN	NaN	71.8319	0.302071
Dengue / QC	_AFSDRNTLIIYLDKVSHSEDDC[Carbamidomethyl (C)]LAFK_	P01024	0.666962	0.666962	2.98175e-05	4.08272e-05	68	P01024	C3	Complement C3	CO3_HUMAN	1	58.7726	1.58773	Dengue	QC	NaN	NaN	NaN	14.8599	0.17489
Dengue / QC	_EQQC[Carbamidomethyl (C)]VIM[Oxidation (M)]AENR_	P00747	0.372176	0.372176	2.98376e-05	4.08454e-05	126	P00747	PLG	Plasminogen	PLMN_HUMAN	1	29.4304	1.2943	Dengue	QC	NaN	NaN	NaN	107.73	0.0950697
Dengue / QC	_DNIQGITKPAIR_	P62805	1.56579	1.56579	2.98529e-05	4.0854e-05	38	P62805	HIST1H4A	Histone H4	H4_HUMAN	1	196.039	2.96039	Dengue	QC	NaN	NaN	NaN	15.6978	0.469326
Dengue / QC	_EVTVPVFYPTEK_	P43121	0.63542	0.63542	2.99395e-05	4.09305e-05	72	P43121	MCAM	Cell surface glycoprotein MUC18	MUC18_HUMAN	1	55.339	1.55339	Dengue	QC	NaN	NaN	NaN	53.701	0.116474
Dengue / QC	_ADYEKHKVYAC[Carbamidomethyl (C)]EVTHQGLSSPVTK_	P01834	2.45027	2.45027	2.99668e-05	4.09571e-05	152	P01834	IGKC	Immunoglobulin kappa constant	IGKC_HUMAN	1	446.517	5.46517	Dengue	QC	NaN	NaN	NaN	109.796	0.454612
Dengue / QC	_LVTDLTK_	P02768	-0.362207	0.362207	3.00047e-05	4.09996e-05	176	P02768	ALB	Serum albumin	ALBU_HUMAN	1	-22.2027	0.777973	Dengue	QC	NaN	NaN	NaN	44.016	0.082506
Dengue / QC	_ASPAFLASQNTK_	P20742	2.17753	2.17753	3.05243e-05	4.16341e-05	126	P20742	PZP	Pregnancy zone protein	PZP_HUMAN	1	352.379	4.52379	Dengue	QC	NaN	NaN	NaN	86.1785	0.52065
Dengue / QC	_SQIFSTASDNQPTVTIK_	P11021	0.815293	0.815293	3.06149e-05	4.17482e-05	32	P11021	HSPA5	78 kDa glucose-regulated protein	GRP78_HUMAN	1	75.9655	1.75966	Dengue	QC	NaN	NaN	NaN	18.3746	0.252046
Dengue / QC	_LMIYEVSNRPSGVPDR_	A0A075B6J9	-0.444645	0.444645	3.08202e-05	4.20003e-05	124	A0A075B6J9	IGLV2-18	Immunoglobulin lambda variable 2-18	LV218_HUMAN	1	-26.5235	0.734765	Dengue	QC	NaN	NaN	NaN	87.2511	0.111568
Dengue / QC	_SPLNDFQVLR_	G3XAK1;P26927	1.04491	1.04491	3.08207e-05	4.20003e-05	20	G3XAK1;P26927	MST1	Hepatocyte growth factor-like protein	G3XAK1_HUMAN;HGFL_HUMAN	1	106.323	2.06323	Dengue	QC	NaN	NaN	NaN	15.8756	0.182453
Dengue / QC	_DTLMISRTPEVTC[Carbamidomethyl (C)]VVVDVSHEDPEVK_	P01857	1.54093	1.54093	3.10851e-05	4.23224e-05	162	P01857	IGHG1	Immunoglobulin heavy constant gamma 1	IGHG1_HUMAN	1	190.981	2.90981	Dengue	QC	NaN	NaN	NaN	89.2467	0.244072
Dengue / QC	_SNTVASLHTEKNTLELSNGVIVK_	P04114	-0.131354	0.131354	3.13372e-05	4.26368e-05	70	P04114	APOB	Apolipoprotein B-100	APOB_HUMAN	1	-8.70256	0.912974	Dengue	QC	NaN	NaN	NaN	37.8478	0.206643
Dengue / QC	_IVVVTAGVR_	P07195	-0.951414	0.951414	3.13771e-05	4.26717e-05	114	P07195	LDHB	L-lactate dehydrogenase B chain	LDHB_HUMAN	1	-48.2875	0.517125	Dengue	QC	NaN	NaN	NaN	100.097	0.205456
Dengue / QC	_GLASANVDFAFSLYKHLVALSPKK_	P08185	0.471899	0.471899	3.15364e-05	4.28353e-05	134	P08185	SERPINA6	Corticosteroid-binding globulin	CBG_HUMAN	1	38.6934	1.38693	Dengue	QC	NaN	NaN	NaN	71.0297	0.120771
Dengue / QC	_NGPM[Oxidation (M)]GPPGM[Oxidation (M)]PGVPGPM[Oxidation (M)]GIPGEPGEEGRYK_	P02747	0.695693	0.695693	3.154e-05	4.28353e-05	18	P02747	C1QC	Complement C1q subcomponent subunit C	C1QC_HUMAN	1	61.9662	1.61966	Dengue	QC	NaN	NaN	NaN	11.765	0.140073
Dengue / QC	_LLDLVFLLDGSSR_	P04275	0.647921	0.647921	3.16072e-05	4.29168e-05	34	P04275	VWF	von Willebrand factor	VWF_HUMAN	1	56.6909	1.56691	Dengue	QC	NaN	NaN	NaN	15.7535	0.165528
Dengue / QC	_AAPGQEPPEHMAELQR_	O00391	0.609589	0.609589	3.18549e-05	4.32337e-05	82	O00391	QSOX1	Sulfhydryl oxidase 1	QSOX1_HUMAN	1	52.5825	1.52582	Dengue	QC	NaN	NaN	NaN	67.2816	0.155604
Dengue / QC	_KVSPHSGVVALTKPVPEPR_	P23142-4	0.691983	0.691983	3.19484e-05	4.33313e-05	118	P23142-4	FBLN1	Isoform C of Fibulin-1	FBLN1_HUMAN	1	61.5502	1.6155	Dengue	QC	NaN	NaN	NaN	88.4341	0.125026
Dengue / QC	_AEAQAQYSAAVAK_	Q14624	-0.481934	0.481934	3.19995e-05	4.33812e-05	176	Q14624	ITIH4	Inter-alpha-trypsin inhibitor heavy chain H4	ITIH4_HUMAN	1	-28.3983	0.716017	Dengue	QC	NaN	NaN	NaN	44.8175	0.11735
Dengue / QC	_SSGLPNIPVQTISR_	G3V0E5;P02786	-0.677233	0.677233	3.21356e-05	4.35479e-05	160	G3V0E5;P02786	TFRC	Transferrin receptor (P90, CD71), isoform CRA_c;Transferrin receptor protein 1	G3V0E5_HUMAN;TFR1_HUMAN	1	-37.4636	0.625364	Dengue	QC	NaN	NaN	NaN	44.3934	0.142503
Dengue / QC	_QVGSGVTTDQVQAEAK_	P01871	-0.529215	0.529215	3.21448e-05	4.35487e-05	174	P01871	IGHM	Immunoglobulin heavy constant mu	IGHM_HUMAN	1	-30.7068	0.692932	Dengue	QC	NaN	NaN	NaN	60.9727	0.110797
Dengue / QC	_QALEEFQKEVSSC[Carbamidomethyl (C)]HC[Carbamidomethyl (C)]APC[Carbamidomethyl (C)]QGNGVPVLK_	P07358	0.596865	0.596865	3.25372e-05	4.40308e-05	48	P07358	C8B	Complement component C8 beta chain	CO8B_HUMAN	1	51.2427	1.51243	Dengue	QC	NaN	NaN	NaN	26.4369	0.131385
Dengue / QC	_MDMTFSK_	P04114	0.304959	0.304959	3.26994e-05	4.41908e-05	122	P04114	APOB	Apolipoprotein B-100	APOB_HUMAN	1	23.5384	1.23538	Dengue	QC	NaN	NaN	NaN	116.459	0.0640131
Dengue / QC	_RRDGYLFQLLR_	P04196	0.320704	0.320704	3.28093e-05	4.43293e-05	128	P04196	HRG	Histidine-rich glycoprotein	HRG_HUMAN	1	24.894	1.24894	Dengue	QC	NaN	NaN	NaN	121.037	0.104216
Dengue / QC	_QEELC[Carbamidomethyl (C)]LAR_	P02753;Q5VY30	0.488989	0.488989	3.28871e-05	4.44145e-05	158	P02753;Q5VY30	RBP4	Retinol-binding protein 4;Retinol binding protein 4, plasma, isoform CRA_b	RET4_HUMAN;Q5VY30_HUMAN	1	40.3461	1.40346	Dengue	QC	NaN	NaN	NaN	68.9713	0.10092
Dengue / QC	_SRLSNLIK_	P02774;P02774-3	0.756117	0.756117	3.29221e-05	4.44519e-05	136	P02774;P02774-3	GC	Vitamin D-binding protein;Isoform 3 of Vitamin D-binding protein	VTDB_HUMAN	1	68.8939	1.68894	Dengue	QC	NaN	NaN	NaN	77.914	0.145736
Dengue / QC	_AEFAEVSK_	P02768	-0.367473	0.367473	3.30738e-05	4.46367e-05	176	P02768	ALB	Serum albumin	ALBU_HUMAN	1	-22.4861	0.775139	Dengue	QC	NaN	NaN	NaN	39.6661	0.0908958
Dengue / QC	_TVVQPSVGAAAGPVVPPC[Carbamidomethyl (C)]PGR_	P02765	0.430527	0.430527	3.38998e-05	4.56595e-05	176	P02765	AHSG	Alpha-2-HS-glycoprotein	FETUA_HUMAN	1	34.7725	1.34773	Dengue	QC	NaN	NaN	NaN	162.919	0.0927696
Dengue / QC	_DSDWPFC[Carbamidomethyl (C)]SDEDWNYKC[Carbamidomethyl (C)]PSGC[Carbamidomethyl (C)]R_	P02671	1.45958	1.45958	3.39576e-05	4.5727e-05	42	P02671	FGA	Fibrinogen alpha chain	FIBA_HUMAN	1	175.028	2.75028	Dengue	QC	NaN	NaN	NaN	32.557	0.215703
Dengue / QC	_RLGNGVQC[Carbamidomethyl (C)]LAMGWGLLGR_	P08246	1.92559	1.92559	3.43357e-05	4.62052e-05	30	P08246	ELANE	Neutrophil elastase	ELNE_HUMAN	1	279.893	3.79893	Dengue	QC	NaN	NaN	NaN	15.1331	0.322847
Dengue / QC	_ESSSHHPGIAEFPSRGK_	P02671	1.89578	1.89578	3.46614e-05	4.66018e-05	44	P02671	FGA	Fibrinogen alpha chain	FIBA_HUMAN	1	272.123	3.72123	Dengue	QC	NaN	NaN	NaN	18.4434	0.29712
Dengue / QC	_TWC[Carbamidomethyl (C)]EGTR_	Q04756	0.66492	0.66492	3.47343e-05	4.66686e-05	62	Q04756	HGFAC	Hepatocyte growth factor activator	HGFA_HUMAN	1	58.5481	1.58548	Dengue	QC	NaN	NaN	NaN	48.3089	0.137372
Dengue / QC	_DM[Oxidation (M)]YSFLEDMGLK_	P01023	3.169	3.169	3.51352e-05	4.71548e-05	66	P01023	A2M	Alpha-2-macroglobulin	A2MG_HUMAN	1	799.423	8.99423	Dengue	QC	NaN	NaN	NaN	28.0742	0.344547
Dengue / QC	_NIQSLEVIGK_	P02775	-0.355359	0.355359	3.54415e-05	4.75446e-05	174	P02775	PPBP	Platelet basic protein	CXCL7_HUMAN	1	-21.8325	0.781675	Dengue	QC	NaN	NaN	NaN	61.8647	0.0752957
Dengue / QC	_KEVYMPSSIFQDDFVIPDISEPGTWK_	P0C0L5	1.41949	1.41949	3.55393e-05	4.76545e-05	128	P0C0L5	C4B	Complement C4-B	CO4B_HUMAN	1	167.49	2.6749	Dengue	QC	NaN	NaN	NaN	78.4704	0.330087
Dengue / QC	_AVGYLITGYQR_	P20742	2.04138	2.04138	3.56538e-05	4.77763e-05	68	P20742	PZP	Pregnancy zone protein	PZP_HUMAN	1	311.64	4.1164	Dengue	QC	NaN	NaN	NaN	43.3578	0.473091
Dengue / QC	_LLNLDGTC[Carbamidomethyl (C)]ADSYSFVFSR_	P02753;Q5VY30	0.387686	0.387686	3.57224e-05	4.78486e-05	166	P02753;Q5VY30	RBP4	Retinol-binding protein 4;Retinol binding protein 4, plasma, isoform CRA_b	RET4_HUMAN;Q5VY30_HUMAN	1	30.8294	1.30829	Dengue	QC	NaN	NaN	NaN	97.5023	0.106082
Dengue / QC	_LMNIFLKDSITTWEILAVSMSDKK_	P01024	0.815942	0.815942	3.59229e-05	4.80834e-05	156	P01024	C3	Complement C3	CO3_HUMAN	1	76.0447	1.76045	Dengue	QC	NaN	NaN	NaN	78.4813	0.138262
Dengue / QC	_GTEAVAGILSEITAYSMPPVIK_	G3V2W1;Q9UK55	1.2841	1.2841	3.61216e-05	4.83279e-05	42	G3V2W1;Q9UK55	SERPINA10	Protein Z-dependent protease inhibitor	G3V2W1_HUMAN;ZPI_HUMAN	1	143.529	2.43529	Dengue	QC	NaN	NaN	NaN	20.5319	0.209274
Dengue / QC	_DTSASTAYM[Oxidation (M)]ELSSLR_	A0A0C4DH29	0.761268	0.761268	3.66524e-05	4.8962e-05	28	A0A0C4DH29	IGHV1-3	Immunoglobulin heavy variable 1-3	HV103_HUMAN	1	69.4979	1.69498	Dengue	QC	NaN	NaN	NaN	21.521	0.240619
Dengue / QC	_NWGLGGHAFC[Carbamidomethyl (C)]RNPDNDIRPWC[Carbamidomethyl (C)]FVLNR_	P00748	1.77205	1.77205	3.67624e-05	4.9098e-05	36	P00748	F12	Coagulation factor XII	FA12_HUMAN	1	241.539	3.41539	Dengue	QC	NaN	NaN	NaN	13.8254	0.245201
Dengue / QC	_IDSLLENDR_	P10909;P10909-2;P10909-4;P10909-5	0.399517	0.399517	3.69195e-05	4.92693e-05	82	P10909;P10909-2;P10909-4;P10909-5	CLU	Clusterin;Isoform 2 of Clusterin;Isoform 4 of Clusterin;Isoform 5 of Clusterin	CLUS_HUMAN	1	31.9067	1.31907	Dengue	QC	NaN	NaN	NaN	42.8584	0.0764317
Dengue / QC	_ISTSLPVLDLIDAIQPGSINYDLLK_	P13796	0.461096	0.461096	3.69234e-05	4.92693e-05	70	P13796	LCP1	Plastin-2	PLSL_HUMAN	1	37.6587	1.37659	Dengue	QC	NaN	NaN	NaN	64.5108	0.119718
Dengue / QC	_NPDSSTTGPWC[Carbamidomethyl (C)]YTTDPTVR_	P00734	0.425599	0.425599	3.71026e-05	4.94538e-05	166	P00734	F2	Prothrombin	THRB_HUMAN	1	34.313	1.34313	Dengue	QC	NaN	NaN	NaN	96.8632	0.0831592
Dengue / QC	_EAAC[Carbamidomethyl (C)]VWC[Carbamidomethyl (C)]NGEEYR_	G3XAK1;P26927	0.49792	0.49792	3.7513e-05	4.99455e-05	62	G3XAK1;P26927	MST1	Hepatocyte growth factor-like protein	G3XAK1_HUMAN;HGFL_HUMAN	1	41.2176	1.41218	Dengue	QC	NaN	NaN	NaN	18.614	0.125191
Dengue / QC	_IC[Carbamidomethyl (C)]LDPDAPR_	P02775	-0.324727	0.324727	3.79915e-05	5.05268e-05	176	P02775	PPBP	Platelet basic protein	CXCL7_HUMAN	1	-20.1551	0.798449	Dengue	QC	NaN	NaN	NaN	79.1535	0.0760717
Dengue / QC	_YKATLLDIYK_	P01031	0.490162	0.490162	3.81155e-05	5.06805e-05	46	P01031	C5	Complement C5	CO5_HUMAN	1	40.4603	1.4046	Dengue	QC	NaN	NaN	NaN	31.7988	0.104308
Dengue / QC	_AAC[Carbamidomethyl (C)]LLPKLDELRDEGK_	P02768	1.96753	1.96753	3.82777e-05	5.08849e-05	154	P02768	ALB	Serum albumin	ALBU_HUMAN	1	291.099	3.91099	Dengue	QC	NaN	NaN	NaN	120.212	0.296544
Dengue / QC	_SQFVQPIC[Carbamidomethyl (C)]LPEPGSTFPAGHK_	Q04756	0.203464	0.203464	3.83014e-05	5.09052e-05	140	Q04756	HGFAC	Hepatocyte growth factor activator	HGFA_HUMAN	1	15.146	1.15146	Dengue	QC	NaN	NaN	NaN	110.861	0.0711791
Dengue / QC	_QPSSAFAAFVK_	P01024	-0.369066	0.369066	3.83342e-05	5.09376e-05	162	P01024	C3	Complement C3	CO3_HUMAN	1	-22.5716	0.774284	Dengue	QC	NaN	NaN	NaN	93.8122	0.0748619
Dengue / QC	_KLYDYC[Carbamidomethyl (C)]DVPQC[Carbamidomethyl (C)]AAPSFDC[Carbamidomethyl (C)]GKPQVEPK_	P00747	0.373963	0.373963	3.8552e-05	5.12044e-05	176	P00747	PLG	Plasminogen	PLMN_HUMAN	1	29.5908	1.29591	Dengue	QC	NaN	NaN	NaN	141.357	0.0751598
Dengue / QC	_VQPYLDDFQK_	P02647	-0.495061	0.495061	3.86754e-05	5.13569e-05	172	P02647	APOA1	Apolipoprotein A-I	APOA1_HUMAN	1	-29.0468	0.709532	Dengue	QC	NaN	NaN	NaN	51.2452	0.1233
Dengue / QC	_DGEDQTQDTELVETRPAGDGTFQK_	P05534;P30447	0.897298	0.897298	3.90545e-05	5.18034e-05	62	P05534;P30447	HLA-A	HLA class I histocompatibility antigen, A-24 alpha chain;HLA class I histocompatibility antigen, A-23 alpha chain	1A24_HUMAN;1A23_HUMAN	1	86.2574	1.86257	Dengue	QC	NaN	NaN	NaN	20.6117	0.151519
Dengue / QC	_HQPQEFPTYVEPTNDEIC[Carbamidomethyl (C)]EAFRKDPK_	P02774;P02774-3	0.404282	0.404282	3.92556e-05	5.20242e-05	176	P02774;P02774-3	GC	Vitamin D-binding protein;Isoform 3 of Vitamin D-binding protein	VTDB_HUMAN	1	32.343	1.32343	Dengue	QC	NaN	NaN	NaN	155.27	0.102182
Dengue / QC	_C[Carbamidomethyl (C)]GLVPVLAENYK_	E7ER44;P02788	0.81128	0.81128	3.92546e-05	5.20242e-05	56	E7ER44;P02788	LTF	Lactotransferrin	E7ER44_HUMAN;TRFL_HUMAN	1	75.4767	1.75477	Dengue	QC	NaN	NaN	NaN	39.6693	0.204586
Dengue / QC	_TC[Carbamidomethyl (C)]ESLGAGGYR_	P98160	0.618905	0.618905	3.9246e-05	5.20242e-05	28	P98160	HSPG2	Basement membrane-specific heparan sulfate proteoglycan core protein	PGBM_HUMAN	1	53.5709	1.53571	Dengue	QC	NaN	NaN	NaN	18.3439	0.211184
Dengue / QC	_NFFNPPIISR_	A0A0A0MRJ7;P12259	0.652595	0.652595	3.95693e-05	5.24285e-05	34	A0A0A0MRJ7;P12259	F5	Coagulation factor V	A0A0A0MRJ7_HUMAN;FA5_HUMAN	1	57.1993	1.57199	Dengue	QC	NaN	NaN	NaN	23.328	0.172886
Dengue / QC	_M[Oxidation (M)]TVTDQVNC[Carbamidomethyl (C)]PK_	P05090	2.36534	2.36534	3.96479e-05	5.24979e-05	90	P05090	APOD	Apolipoprotein D	APOD_HUMAN	1	415.275	5.15275	Dengue	QC	NaN	NaN	NaN	44.2562	0.370294
Dengue / QC	_FSGQLNSHGC[Carbamidomethyl (C)]FYQQVK_	P01023	-0.489532	0.489532	3.97716e-05	5.26501e-05	176	P01023	A2M	Alpha-2-macroglobulin	A2MG_HUMAN	1	-28.7744	0.712256	Dengue	QC	NaN	NaN	NaN	57.3701	0.106194
Dengue / QC	_WDRELISER_	P02790	0.449401	0.449401	3.99373e-05	5.28463e-05	134	P02790	HPX	Hemopexin	HEMO_HUMAN	1	36.5474	1.36547	Dengue	QC	NaN	NaN	NaN	62.4244	0.102855
Dengue / QC	_TPC[Carbamidomethyl (C)]EEILVK_	P21333;P21333-2;Q5HY54	0.466464	0.466464	3.99629e-05	5.28686e-05	84	P21333;P21333-2;Q5HY54	FLNA	Filamin-A;Isoform 2 of Filamin-A;Filamin-A	FLNA_HUMAN;FLNA_HUMAN;Q5HY54_HUMAN	1	38.1719	1.38172	Dengue	QC	NaN	NaN	NaN	74.3665	0.110592
Dengue / QC	_LPKLYLKHQMDLVATLSQLGLQELFQAPDLR_	P08697	1.54321	1.54321	4.03551e-05	5.33406e-05	46	P08697	SERPINF2	Alpha-2-antiplasmin	A2AP_HUMAN	1	191.441	2.91441	Dengue	QC	NaN	NaN	NaN	25.5552	0.205473
Dengue / QC	_FC[Carbamidomethyl (C)]GTFRPAPLVAPGNQVTLR_	Q15113	0.758429	0.758429	4.03862e-05	5.33583e-05	32	Q15113	PCOLCE	Procollagen C-endopeptidase enhancer 1	PCOC1_HUMAN	1	69.1648	1.69165	Dengue	QC	NaN	NaN	NaN	23.1081	0.221054
Dengue / QC	_YGFIEGHVVIPR_	H0Y2P0;H0Y5E4;H0YCV9;H0YDW7;H0YDX6;P16070;P16070-10;P16070-11;P16070-12;P16070-13;P16070-14;P16070-15;P16070-16;P16070-17;P16070-18;P16070-3;P16070-4;P16070-5;P16070-6;P16070-7;P16070-8;P16070-9	-0.24495	0.24495	4.07737e-05	5.38466e-05	148	H0Y2P0;H0Y5E4;H0YCV9;H0YDW7;H0YDX6;P16070;P16070-10;P16070-11;P16070-12;P16070-13;P16070-14;P16070-15;P16070-16;P16070-17;P16070-18;P16070-3;P16070-4;P16070-5;P16070-6;P16070-7;P16070-8;P16070-9	CD44	CD44 antigen (Fragment);CD44 antigen (Fragment);CD44 antigen (Fragment);CD44 antigen (Fragment);CD44 antigen (Fragment);CD44 antigen;Isoform 10 of CD44 antigen;Isoform 11 of CD44 antigen;Isoform 12 of CD44 antigen;Isoform 13 of CD44 antigen;Isoform 14 of CD44 antigen;Isoform 15 of CD44 antigen;Isoform 16 of CD44 antigen;Isoform 17 of CD44 antigen;Isoform 18 of CD44 antigen;Isoform 3 of CD44 antig…	H0Y2P0_HUMAN;H0Y5E4_HUMAN;H0YCV9_HUMAN;H0YDW7_HUMAN;H0YDX6_HUMAN;CD44_HUMAN;CD44_HUMAN;CD44_HUMAN;CD44_HUMAN;CD44_HUMAN;CD44_HUMAN;CD44_HUMAN;CD44_HUMAN;CD44_HUMAN;CD44_HUMAN;CD44_HUMAN;CD44_HUMAN;CD44_HUMAN;CD44_HUMAN;CD44_HUMAN;CD44_HUMAN;CD44_HUMAN	1	-15.6155	0.843845	Dengue	QC	NaN	NaN	NaN	79.6008	0.0605518
Dengue / QC	_ASQSISSYLNWYQQKPGKAPK_	P01597;P04432	-0.376387	0.376387	4.09436e-05	5.40592e-05	148	P01597;P04432	IGKV1-39;IGKV1D-39	Immunoglobulin kappa variable 1-39;Immunoglobulin kappa variable 1D-39	KV139_HUMAN;KVD39_HUMAN	1	-22.9635	0.770365	Dengue	QC	NaN	NaN	NaN	93.8732	0.108005
Dengue / QC	_VNVDAVGGEALGR_	P02042	0.288486	0.288486	4.09864e-05	5.4092e-05	152	P02042	HBD	Hemoglobin subunit delta	HBD_HUMAN	1	22.1358	1.22136	Dengue	QC	NaN	NaN	NaN	137.496	0.0638736
Dengue / QC	_SITC[Carbamidomethyl (C)]IHGVWTQLPQC[Carbamidomethyl (C)]VAIDKLKK_	P08603	0.77909	0.77909	4.10735e-05	5.41951e-05	170	P08603	CFH	Complement factor H	CFAH_HUMAN	1	71.6048	1.71605	Dengue	QC	NaN	NaN	NaN	120.916	0.169098
Dengue / QC	_GQYC[Carbamidomethyl (C)]YELDEKAVRPGYPK_	P04004	2.78976	2.78976	4.11155e-05	5.42387e-05	34	P04004	VTN	Vitronectin	VTNC_HUMAN	1	591.517	6.91517	Dengue	QC	NaN	NaN	NaN	7.06764	0.219463
Dengue / QC	_AQLVPLPPSTYVEFTVSGTDC[Carbamidomethyl (C)]VAKEATEAAK_	P02765	0.953114	0.953114	4.15515e-05	5.47539e-05	150	P02765	AHSG	Alpha-2-HS-glycoprotein	FETUA_HUMAN	1	93.6047	1.93605	Dengue	QC	NaN	NaN	NaN	110.265	0.173836
Dengue / QC	_YIYGKPVQGVAYVR_	P0C0L5	-0.30597	0.30597	4.28177e-05	5.63238e-05	176	P0C0L5	C4B	Complement C4-B	CO4B_HUMAN	1	-19.1102	0.808898	Dengue	QC	NaN	NaN	NaN	104.075	0.0620185
Dengue / QC	_STAAM[Oxidation (M)]STYTGIFTDQVLSVLKGEE_	A0A024R0T9;K7ER74;P02655	-0.14156	0.14156	4.30274e-05	5.65873e-05	18	A0A024R0T9;K7ER74;P02655	APOC4-APOC2;APOC4-APOC2;APOC2	Apolipoprotein C-II isoform 1;APOC4-APOC2 readthrough (NMD candidate);Apolipoprotein C-II	A0A024R0T9_HUMAN;K7ER74_HUMAN;APOC2_HUMAN	1	-9.34613	0.906539	Dengue	QC	NaN	NaN	NaN	5.90604	0.375249
Dengue / QC	_AQWANPFDPSKTEDSSSFLIDK_	P05543	0.917113	0.917113	4.33257e-05	5.68927e-05	34	P05543	SERPINA7	Thyroxine-binding globulin	THBG_HUMAN	1	88.8333	1.88833	Dengue	QC	NaN	NaN	NaN	23.2286	0.13463
Dengue / QC	_FGSYC[Carbamidomethyl (C)]PTTC[Carbamidomethyl (C)]GIADFLSTYQTK_	P02679;P02679-2	1.51907	1.51907	4.39451e-05	5.76182e-05	72	P02679;P02679-2	FGG	Fibrinogen gamma chain;Isoform Gamma-A of Fibrinogen gamma chain	FIBG_HUMAN	1	186.607	2.86607	Dengue	QC	NaN	NaN	NaN	54.7334	0.246881
Dengue / QC	_AAPSVTLFPPSSEELQANK_	P0DOY2	-0.434685	0.434685	4.43651e-05	5.8131e-05	174	P0DOY2	IGLC2	Immunoglobulin lambda constant 2	IGLC2_HUMAN	1	-26.0144	0.739856	Dengue	QC	NaN	NaN	NaN	90.2876	0.0905901
Dengue / QC	_ISASAEELR_	P06727	0.415339	0.415339	4.43782e-05	5.81354e-05	164	P06727	APOA4	Apolipoprotein A-IV	APOA4_HUMAN	1	33.3612	1.33361	Dengue	QC	NaN	NaN	NaN	158.723	0.0940783
Dengue / QC	_VGSALFLSHNLK_	P29622	0.936512	0.936512	4.46557e-05	5.84481e-05	30	P29622	SERPINA4	Kallistatin	KAIN_HUMAN	1	91.3896	1.9139	Dengue	QC	NaN	NaN	NaN	7.49275	0.148605
Dengue / QC	_HYLMWGLSSDFWGEKPNLSYIIGK_	P01024	0.651315	0.651315	4.57537e-05	5.97555e-05	88	P01024	C3	Complement C3	CO3_HUMAN	1	57.0599	1.5706	Dengue	QC	NaN	NaN	NaN	29.8502	0.156249
Dengue / QC	_NKRDTMVEDLVVLVR_	P07358	0.870527	0.870527	4.57908e-05	5.9765e-05	44	P07358	C8B	Complement component C8 beta chain	CO8B_HUMAN	1	82.8331	1.82833	Dengue	QC	NaN	NaN	NaN	20.957	0.20447
Dengue / QC	_HQDGSYSTFGER_	P20742	3.0537	3.0537	4.61559e-05	6.02285e-05	70	P20742	PZP	Pregnancy zone protein	PZP_HUMAN	1	730.336	8.30336	Dengue	QC	NaN	NaN	NaN	50.0139	0.68619
Dengue / QC	_ASVDSGSSEEQGGSSR_	P01833	1.12866	1.12866	4.63079e-05	6.03876e-05	20	P01833	PIGR	Polymeric immunoglobulin receptor	PIGR_HUMAN	1	118.655	2.18655	Dengue	QC	NaN	NaN	NaN	11.574	0.264239
Dengue / QC	_DSVTETLPR_	P03951	0.630803	0.630803	4.66066e-05	6.07378e-05	52	P03951	F11	Coagulation factor XI	FA11_HUMAN	1	54.8426	1.54843	Dengue	QC	NaN	NaN	NaN	42.648	0.1468
Dengue / QC	_EKNVPLPVIAELPPK_	P01871	-0.614446	0.614446	4.68705e-05	6.10289e-05	156	P01871	IGHM	Immunoglobulin heavy constant mu	IGHM_HUMAN	1	-34.6819	0.653181	Dengue	QC	NaN	NaN	NaN	69.4134	0.126851
Dengue / QC	_SQC[Carbamidomethyl (C)]TYSNPEGTVVLAC[Carbamidomethyl (C)]DQAQC[Carbamidomethyl (C)]R_	P22792	0.397984	0.397984	4.72248e-05	6.1477e-05	176	P22792	CPN2	Carboxypeptidase N subunit 2	CPN2_HUMAN	1	31.7665	1.31767	Dengue	QC	NaN	NaN	NaN	115.079	0.0827064
Dengue / QC	_HLEVDVWVIEPQGLR_	P19823	0.579482	0.579482	4.74969e-05	6.17911e-05	176	P19823	ITIH2	Inter-alpha-trypsin inhibitor heavy chain H2	ITIH2_HUMAN	1	49.4312	1.49431	Dengue	QC	NaN	NaN	NaN	76.3049	0.144054
Dengue / QC	_VHVSEEGTEPEAMLQVLGPK_	P06396	0.160323	0.160323	4.86355e-05	6.31768e-05	82	P06396	GSN	Gelsolin	GELS_HUMAN	1	11.7537	1.11754	Dengue	QC	NaN	NaN	NaN	28.2066	0.0972915
Dengue / QC	_EPQVYTLPPSREEM[Oxidation (M)]TK_	P01860	-0.666066	0.666066	4.8738e-05	6.32963e-05	176	P01860	IGHG3	Immunoglobulin heavy constant gamma 3	IGHG3_HUMAN	1	-36.9777	0.630223	Dengue	QC	NaN	NaN	NaN	51.253	0.15532
Dengue / QC	_C[Carbamidomethyl (C)]LDPC[Carbamidomethyl (C)]VVSEENMNKNNIQLK_	Q9BXR6	0.651214	0.651214	4.87497e-05	6.32979e-05	54	Q9BXR6	CFHR5	Complement factor H-related protein 5	FHR5_HUMAN	1	57.049	1.57049	Dengue	QC	NaN	NaN	NaN	44.1909	0.159187
Dengue / QC	_ALDLINK_	P04196	-0.492868	0.492868	4.97762e-05	6.45612e-05	154	P04196	HRG	Histidine-rich glycoprotein	HRG_HUMAN	1	-28.9389	0.710611	Dengue	QC	NaN	NaN	NaN	31.4783	0.103197
Dengue / QC	_ASQSISSWLAWYQQKPGKAPK_	P01602	-0.73045	0.73045	4.97696e-05	6.45612e-05	176	P01602	IGKV1-5	Immunoglobulin kappa variable 1-5	KV105_HUMAN	1	-39.7284	0.602716	Dengue	QC	NaN	NaN	NaN	48.8201	0.169063
Dengue / QC	_VGTGGIVGSKGDGIPDR_	A0A0B4J1Y8	0.551556	0.551556	4.99206e-05	6.47233e-05	32	A0A0B4J1Y8	IGLV9-49	Immunoglobulin lambda variable 9-49	LV949_HUMAN	1	46.5666	1.46567	Dengue	QC	NaN	NaN	NaN	21.7413	0.1447
Dengue / QC	_AQLVPLPPSTYVEFTVSGTDC[Carbamidomethyl (C)]VAKEATEAAKC[Carbamidomethyl (C)]NLLAEK_	P02765	2.34246	2.34246	4.99227e-05	6.47233e-05	18	P02765	AHSG	Alpha-2-HS-glycoprotein	FETUA_HUMAN	1	407.167	5.07167	Dengue	QC	NaN	NaN	NaN	9.26201	0.329582
Dengue / QC	_LGNGVQC[Carbamidomethyl (C)]LAMGWGLLGR_	P08246	1.84281	1.84281	5.08163e-05	6.57969e-05	24	P08246	ELANE	Neutrophil elastase	ELNE_HUMAN	1	258.708	3.58708	Dengue	QC	NaN	NaN	NaN	9.01129	0.980256
Dengue / QC	_FAVLQENVAWGNGR_	Q9Y6R7	0.96084	0.96084	5.0963e-05	6.59444e-05	46	Q9Y6R7	FCGBP	IgGFc-binding protein	FCGBP_HUMAN	1	94.6443	1.94644	Dengue	QC	NaN	NaN	NaN	39.3356	0.24385
Dengue / QC	_FDTISEK_	P01008	1.17287	1.17287	5.12218e-05	6.62224e-05	26	P01008	SERPINC1	Antithrombin-III	ANT3_HUMAN	1	125.46	2.2546	Dengue	QC	NaN	NaN	NaN	18.406	0.199813
Dengue / QC	_LIVHNGYC[Carbamidomethyl (C)]DGR_	P02753;Q5VY30	0.496799	0.496799	5.13556e-05	6.63669e-05	148	P02753;Q5VY30	RBP4	Retinol-binding protein 4;Retinol binding protein 4, plasma, isoform CRA_b	RET4_HUMAN;Q5VY30_HUMAN	1	41.1079	1.41108	Dengue	QC	NaN	NaN	NaN	98.4207	0.0960478
Dengue / QC	_IMNGEADAM[Oxidation (M)]SLDGGFVYIAGK_	P02787	0.980351	0.980351	5.20606e-05	6.7134e-05	108	P02787	TF	Serotransferrin	TRFE_HUMAN	1	97.2945	1.97294	Dengue	QC	NaN	NaN	NaN	77.0483	0.126766
Dengue / QC	_DFALLSLQVPLKDAK_	P0C0L5	0.256618	0.256618	5.21625e-05	6.72383e-05	174	P0C0L5	C4B	Complement C4-B	CO4B_HUMAN	1	19.4675	1.19468	Dengue	QC	NaN	NaN	NaN	129.389	0.082738
Dengue / QC	_FALVREDR_	P04217	0.397446	0.397446	5.23068e-05	6.73887e-05	174	P04217	A1BG	Alpha-1B-glycoprotein	A1BG_HUMAN	1	31.7174	1.31717	Dengue	QC	NaN	NaN	NaN	142.33	0.0919889
Dengue / QC	_VVWC[Carbamidomethyl (C)]AVGEQELR_	E7ER44;P02788	1.0236	1.0236	5.24818e-05	6.75759e-05	72	E7ER44;P02788	LTF	Lactotransferrin	E7ER44_HUMAN;TRFL_HUMAN	1	103.299	2.03299	Dengue	QC	NaN	NaN	NaN	49.0564	0.23018
Dengue / QC	_TRKGNVATEISTER_	P04114	1.35619	1.35619	5.28123e-05	6.79579e-05	60	P04114	APOB	Apolipoprotein B-100	APOB_HUMAN	1	156.008	2.56008	Dengue	QC	NaN	NaN	NaN	34.6917	0.225531
Dengue / QC	_STDYGIFQINSR_	P61626	-0.43418	0.43418	5.35115e-05	6.87989e-05	168	P61626	LYZ	Lysozyme C	LYSC_HUMAN	1	-25.9886	0.740114	Dengue	QC	NaN	NaN	NaN	98.1226	0.0982742
Dengue / QC	_SLIYAASSLQSGVPSK_	P04430	-0.595153	0.595153	5.39386e-05	6.92446e-05	170	P04430	IGKV1-16	Immunoglobulin kappa variable 1-16	KV116_HUMAN	1	-33.8026	0.661974	Dengue	QC	NaN	NaN	NaN	43.9241	0.146129
Dengue / QC	_ALLVGEHLNIIVTPK_	P01031	0.251871	0.251871	5.43639e-05	6.97311e-05	98	P01031	C5	Complement C5	CO5_HUMAN	1	19.075	1.19075	Dengue	QC	NaN	NaN	NaN	43.3178	0.131146
Dengue / QC	_QAGLGNHLSGSER_	Q15582	0.725456	0.725456	5.48252e-05	7.0293e-05	48	Q15582	TGFBI	Transforming growth factor-beta-induced protein ig-h3	BGH3_HUMAN	1	65.3423	1.65342	Dengue	QC	NaN	NaN	NaN	30.2896	0.15152
Dengue / QC	_NMAEQIIQEIYSQIQSK_	P29401;P29401-2	1.26145	1.26145	5.4825e-05	7.0293e-05	42	P29401;P29401-2	TKT	Transketolase;Isoform 2 of Transketolase	TKT_HUMAN	1	139.737	2.39737	Dengue	QC	NaN	NaN	NaN	21.0463	0.306787
Dengue / QC	_IIC[Carbamidomethyl (C)]DNTGITTVSK_	P05164;P05164-2;P05164-3	0.671351	0.671351	5.49887e-05	7.04726e-05	78	P05164;P05164-2;P05164-3	MPO	Myeloperoxidase;Isoform H14 of Myeloperoxidase;Isoform H7 of Myeloperoxidase	PERM_HUMAN	1	59.2564	1.59256	Dengue	QC	NaN	NaN	NaN	56.6487	0.168465
Dengue / QC	_HLDSVLQQLQTEVYR_	F8VYK9;P24592	1.27286	1.27286	5.62745e-05	7.1952e-05	56	F8VYK9;P24592	IGFBP6	Insulin-like growth factor-binding protein 6	F8VYK9_HUMAN;IBP6_HUMAN	1	141.639	2.41639	Dengue	QC	NaN	NaN	NaN	42.7519	0.231922
Dengue / QC	_VDLSFSPSQSLPASHAHLR_	P01023	-0.351986	0.351986	5.70042e-05	7.27956e-05	176	P01023	A2M	Alpha-2-macroglobulin	A2MG_HUMAN	1	-21.6495	0.783505	Dengue	QC	NaN	NaN	NaN	93.3885	0.0713627
Dengue / QC	_LLIYDNNKRPSGIPDR_	P01701	-0.39764	0.39764	5.71493e-05	7.29622e-05	162	P01701	IGLV1-51	Immunoglobulin lambda variable 1-51	LV151_HUMAN	1	-24.0901	0.759099	Dengue	QC	NaN	NaN	NaN	105.249	0.0957999
Dengue / QC	_QFTSSTSYNRGDSTFESK_	P02671	1.67398	1.67398	5.72879e-05	7.31082e-05	170	P02671	FGA	Fibrinogen alpha chain	FIBA_HUMAN	1	219.093	3.19093	Dengue	QC	NaN	NaN	NaN	149.238	0.340068
Dengue / QC	_TYTC[Carbamidomethyl (C)]NVDHKPSNTK_	P01861	0.503731	0.503731	5.7972e-05	7.39342e-05	176	P01861	IGHG4	Immunoglobulin heavy constant gamma 4	IGHG4_HUMAN	1	41.7875	1.41788	Dengue	QC	NaN	NaN	NaN	151.129	0.117465
Dengue / QC	_VAAEDWK_	A0A0G2JMB2	-0.395191	0.395191	5.80839e-05	7.40613e-05	176	A0A0G2JMB2	IGHA2	Immunoglobulin heavy constant alpha 2 (Fragment)	A0A0G2JMB2_HUMAN	1	-23.9611	0.760389	Dengue	QC	NaN	NaN	NaN	104.106	0.0912516
Dengue / QC	_SRVTM[Oxidation (M)]SVDTSK_	A0A0C4DH34	-1.38383	1.38383	5.81675e-05	7.41522e-05	16	A0A0C4DH34	IGHV4-28	Immunoglobulin heavy variable 4-28	HV428_HUMAN	1	-61.6799	0.383201	Dengue	QC	NaN	NaN	NaN	5.45212	0.500496
Dengue / QC	_EGFGHLSPTGTTEFWLGNEK_	P02679;P02679-2	1.43843	1.43843	5.85107e-05	7.45423e-05	138	P02679;P02679-2	FGG	Fibrinogen gamma chain;Isoform Gamma-A of Fibrinogen gamma chain	FIBG_HUMAN	1	171.026	2.71026	Dengue	QC	NaN	NaN	NaN	130.518	0.29032
Dengue / QC	_LGLGADVAQVTGALR_	P14780	1.27062	1.27062	5.85065e-05	7.45423e-05	50	P14780	MMP9	Matrix metalloproteinase-9	MMP9_HUMAN	1	141.265	2.41265	Dengue	QC	NaN	NaN	NaN	39.56	0.24135
Dengue / QC	_GSPAINVAVHVFR_	P02766	0.397038	0.397038	5.89192e-05	7.49994e-05	164	P02766	TTR	Transthyretin	TTHY_HUMAN	1	31.6802	1.3168	Dengue	QC	NaN	NaN	NaN	151.174	0.0938736
Dengue / QC	_LSSVTAADTAVYYC[Carbamidomethyl (C)]AR_	A0A075B6R2	-0.459052	0.459052	5.93069e-05	7.54133e-05	176	A0A075B6R2	IGHV4-4	Immunoglobulin heavy variable 4-4	HV404_HUMAN	1	-27.2536	0.727464	Dengue	QC	NaN	NaN	NaN	73.4592	0.105104
Dengue / QC	_TRFVYHLSDLC[Carbamidomethyl (C)]K_	P01591	0.920612	0.920612	5.94012e-05	7.55172e-05	134	P01591	JCHAIN	Immunoglobulin J chain	IGJ_HUMAN	1	89.2919	1.89292	Dengue	QC	NaN	NaN	NaN	115.632	0.185522
Dengue / QC	_ETSNFGFSLLRK_	G3V2W1;Q9UK55	0.571435	0.571435	6.03932e-05	7.6649e-05	46	G3V2W1;Q9UK55	SERPINA10	Protein Z-dependent protease inhibitor	G3V2W1_HUMAN;ZPI_HUMAN	1	48.6001	1.486	Dengue	QC	NaN	NaN	NaN	20.2438	0.137733
Dengue / QC	_HSTIFENLANKADR_	P02787	-0.38449	0.38449	6.08037e-05	7.71375e-05	176	P02787	TF	Serotransferrin	TRFE_HUMAN	1	-23.395	0.76605	Dengue	QC	NaN	NaN	NaN	54.3369	0.0942629
Dengue / QC	_AEDTAVYYC[Carbamidomethyl (C)]AK_	A0A0J9YY99	-0.372883	0.372883	6.09906e-05	7.73583e-05	176	A0A0J9YY99	NaN	Uncharacterized protein (Fragment)	A0A0J9YY99_HUMAN	1	-22.7762	0.772238	Dengue	QC	NaN	NaN	NaN	61.1306	0.0960467
Dengue / QC	_VVLGAHNLSR_	P08246	1.3903	1.3903	6.14896e-05	7.78472e-05	22	P08246	ELANE	Neutrophil elastase	ELNE_HUMAN	1	162.133	2.62133	Dengue	QC	NaN	NaN	NaN	13.2465	0.339079
Dengue / QC	_STGKPTLYNVSLVM[Oxidation (M)]SDTAGTC[Carbamidomethyl (C)]Y_	P01871	-0.381304	0.381304	6.15853e-05	7.79322e-05	28	P01871	IGHM	Immunoglobulin heavy constant mu	IGHM_HUMAN	1	-23.2257	0.767743	Dengue	QC	NaN	NaN	NaN	12.6442	0.224725
Dengue / QC	_LYPTYSTK_	P80108	0.388296	0.388296	6.16396e-05	7.79684e-05	84	P80108	GPLD1	Phosphatidylinositol-glycan-specific phospholipase D	PHLD_HUMAN	1	30.8847	1.30885	Dengue	QC	NaN	NaN	NaN	43.9527	0.0831626
Dengue / QC	_EVVTSEDGSDC[Carbamidomethyl (C)]PEAMDLGTLSGIGTLDGFR_	P02671	1.12842	1.12842	6.16795e-05	7.79858e-05	162	P02671	FGA	Fibrinogen alpha chain	FIBA_HUMAN	1	118.619	2.18619	Dengue	QC	NaN	NaN	NaN	152.505	0.227818
Dengue / QC	_LLGMETMAWQEIR_	B4E1Z4	0.542229	0.542229	6.17802e-05	7.80968e-05	72	B4E1Z4	NaN	cDNA FLJ55673, highly similar to Complement factor B (EC 3.4.21.47)	B4E1Z4_HUMAN	1	45.6221	1.45622	Dengue	QC	NaN	NaN	NaN	62.0834	0.128208
Dengue / QC	_DSITTWEILAVSM[Oxidation (M)]SDKK_	P01024	0.730713	0.730713	6.23573e-05	7.87603e-05	44	P01024	C3	Complement C3	CO3_HUMAN	1	65.9459	1.65946	Dengue	QC	NaN	NaN	NaN	28.6166	0.132779
Dengue / QC	_LLFKGSEMVVAGK_	Q14624	0.697168	0.697168	6.27523e-05	7.91761e-05	68	Q14624	ITIH4	Inter-alpha-trypsin inhibitor heavy chain H4	ITIH4_HUMAN	1	62.1319	1.62132	Dengue	QC	NaN	NaN	NaN	59.1938	0.163134
Dengue / QC	_VAEGTQVLELPFKGDDITM[Oxidation (M)]VLILPKPEK_	P01008	0.632647	0.632647	6.27674e-05	7.91786e-05	162	P01008	SERPINC1	Antithrombin-III	ANT3_HUMAN	1	55.0407	1.55041	Dengue	QC	NaN	NaN	NaN	111.617	0.200746
Dengue / QC	_NSLYLQM[Oxidation (M)]NSLRAEDTAVYYC[Carbamidomethyl (C)]AR_	P01762	-0.2815	0.2815	6.31486e-05	7.95928e-05	22	P01762	IGHV3-11	Immunoglobulin heavy variable 3-11	HV311_HUMAN	1	-17.7265	0.822735	Dengue	QC	NaN	NaN	NaN	8.3099	1.05039
Dengue / QC	_VQYEC[Carbamidomethyl (C)]ATGYYTAGGKK_	P05160	0.488137	0.488137	6.34569e-05	7.9948e-05	82	P05160	F13B	Coagulation factor XIII B chain	F13B_HUMAN	1	40.2633	1.40263	Dengue	QC	NaN	NaN	NaN	35.627	0.101864
Dengue / QC	_LNM[Oxidation (M)]GITDLQGLR_	P0C0L5	0.419333	0.419333	6.36434e-05	8.00992e-05	68	P0C0L5	C4B	Complement C4-B	CO4B_HUMAN	1	33.7309	1.33731	Dengue	QC	NaN	NaN	NaN	58.3276	0.0990681
Dengue / QC	_TRFISLGEAC[Carbamidomethyl (C)]K_	P01024	2.06204	2.06204	6.37821e-05	8.02403e-05	16	P01024	C3	Complement C3	CO3_HUMAN	1	317.576	4.17576	Dengue	QC	NaN	NaN	NaN	10.0111	0.263206
Dengue / QC	_FTNIGPDTMR_	P02751;P02751-15;P02751-3;P02751-7	0.180773	0.180773	6.47184e-05	8.13333e-05	162	P02751;P02751-15;P02751-3;P02751-7	FN1	Fibronectin;Isoform 15 of Fibronectin;Isoform 3 of Fibronectin;Isoform 7 of Fibronectin	FINC_HUMAN	1	13.3491	1.13349	Dengue	QC	NaN	NaN	NaN	128.68	0.0738428
Dengue / QC	_MALEVYK_	P04003	-0.315584	0.315584	6.49934e-05	8.16449e-05	176	P04003	C4BPA	C4b-binding protein alpha chain	C4BPA_HUMAN	1	-19.6474	0.803526	Dengue	QC	NaN	NaN	NaN	41.4578	0.0813996
Dengue / QC	_QINSYVK_	P08185	0.744455	0.744455	6.51766e-05	8.18409e-05	48	P08185	SERPINA6	Corticosteroid-binding globulin	CBG_HUMAN	1	67.5341	1.67534	Dengue	QC	NaN	NaN	NaN	25.6453	0.130864
Dengue / QC	_LPGGLEPK_	P22692;P22692-2	1.84376	1.84376	6.56629e-05	8.24172e-05	14	P22692;P22692-2	IGFBP4	Insulin-like growth factor-binding protein 4;Isoform 2 of Insulin-like growth factor-binding protein 4	IBP4_HUMAN	1	258.945	3.58945	Dengue	QC	NaN	NaN	NaN	9.14667	0.301887
Dengue / QC	_NGNMAGISDQR_	P05546	0.393813	0.393813	6.58171e-05	8.25935e-05	108	P05546	SERPIND1	Heparin cofactor 2	HEP2_HUMAN	1	31.3861	1.31386	Dengue	QC	NaN	NaN	NaN	91.516	0.0804875
Dengue / QC	_GEWVALNPLR_	P08603	0.372063	0.372063	6.60359e-05	8.28163e-05	86	P08603	CFH	Complement factor H	CFAH_HUMAN	1	29.4203	1.2942	Dengue	QC	NaN	NaN	NaN	32.1532	0.0844935
Dengue / QC	_GQESSTDIKAPEGFAVR_	Q9NZP8	-0.388787	0.388787	6.60688e-05	8.28403e-05	140	Q9NZP8	C1RL	Complement C1r subcomponent-like protein	C1RL_HUMAN	1	-23.6228	0.763772	Dengue	QC	NaN	NaN	NaN	52.8802	0.0847198
Dengue / QC	_WQEEMELYRQK_	P02647	0.601275	0.601275	6.60978e-05	8.28594e-05	36	P02647	APOA1	Apolipoprotein A-I	APOA1_HUMAN	1	51.7057	1.51706	Dengue	QC	NaN	NaN	NaN	25.4368	0.127433
Dengue / QC	_SVLRPSQFGGQPC[Carbamidomethyl (C)]TAPLVAFQPC[Carbamidomethyl (C)]IPSK_	P13671	0.926028	0.926028	6.67263e-05	8.34564e-05	164	P13671	C6	Complement component C6	CO6_HUMAN	1	90.0037	1.90004	Dengue	QC	NaN	NaN	NaN	102.269	0.110028
Dengue / QC	_GFYPSDIAVEWESNGQPENNYKTTPPVLDSDGSFFLYSK_	P01857	1.11029	1.11029	6.68981e-05	8.36365e-05	28	P01857	IGHG1	Immunoglobulin heavy constant gamma 1	IGHG1_HUMAN	1	115.888	2.15888	Dengue	QC	NaN	NaN	NaN	12.0674	0.2617
Dengue / QC	_M[Oxidation (M)]LADAPPQDPSC[Carbamidomethyl (C)]C[Carbamidomethyl (C)]SGALYYGSK_	P19823	1.30021	1.30021	6.95243e-05	8.66861e-05	64	P19823	ITIH2	Inter-alpha-trypsin inhibitor heavy chain H2	ITIH2_HUMAN	1	146.264	2.46264	Dengue	QC	NaN	NaN	NaN	39.855	0.298801
Dengue / QC	_TEIDKPSQM[Oxidation (M)]QVTDVQDNSISVK_	P02751;P02751-15;P02751-3;P02751-7	1.28808	1.28808	6.95512e-05	8.66982e-05	34	P02751;P02751-15;P02751-3;P02751-7	FN1	Fibronectin;Isoform 15 of Fibronectin;Isoform 3 of Fibronectin;Isoform 7 of Fibronectin	FINC_HUMAN	1	144.203	2.44203	Dengue	QC	NaN	NaN	NaN	16.8464	0.235784
Dengue / QC	_MHSM[Oxidation (M)]NGFMYGNQPGLTMC[Carbamidomethyl (C)]K_	P00450	0.124907	0.124907	6.99697e-05	8.71512e-05	28	P00450	CP	Ceruloplasmin	CERU_HUMAN	1	9.04374	1.09044	Dengue	QC	NaN	NaN	NaN	21.2885	0.149712
Dengue / QC	_DGNTLTYYR_	P02748	-0.461849	0.461849	7.06677e-05	8.7966e-05	168	P02748	C9	Complement component C9	CO9_HUMAN	1	-27.3945	0.726055	Dengue	QC	NaN	NaN	NaN	45.6488	0.105366
Dengue / QC	_AIPDLTAPVAAVQAAVSNLVR_	P18206;P18206-2	0.859639	0.859639	7.07528e-05	8.80537e-05	64	P18206;P18206-2	VCL	Vinculin;Isoform 1 of Vinculin	VINC_HUMAN	1	81.4584	1.81458	Dengue	QC	NaN	NaN	NaN	52.4669	0.20014
Dengue / QC	_SHKSYSC[Carbamidomethyl (C)]QVTHEGSTVEK_	P0DOY3	0.988001	0.988001	7.11739e-05	8.84865e-05	162	P0DOY3	IGLC3	Immunoglobulin lambda constant 3	IGLC3_HUMAN	1	98.3435	1.98344	Dengue	QC	NaN	NaN	NaN	156.602	0.258145
Dengue / QC	_M[Oxidation (M)]GPKGEPGDPVNLLR_	O75636	-0.481961	0.481961	7.23211e-05	8.98015e-05	172	O75636	FCN3	Ficolin-3	FCN3_HUMAN	1	-28.3996	0.716004	Dengue	QC	NaN	NaN	NaN	63.6848	0.113023
Dengue / QC	_VQSTELC[Carbamidomethyl (C)]AGHLAGGTDSC[Carbamidomethyl (C)]QGDSGGPLVC[Carbamidomethyl (C)]FEKDK_	P00747	0.180992	0.180992	7.24598e-05	8.99367e-05	136	P00747	PLG	Plasminogen	PLMN_HUMAN	1	13.3663	1.13366	Dengue	QC	NaN	NaN	NaN	78.9885	0.0571868
Dengue / QC	_MQKEITALAPSTMK_	P60709	1.36668	1.36668	7.25905e-05	9.00804e-05	76	P60709	ACTB	Actin, cytoplasmic 1	ACTB_HUMAN	1	157.876	2.57876	Dengue	QC	NaN	NaN	NaN	47.2236	0.282109
Dengue / QC	_SSPVVIDASTAIDAPSNLR_	P02751;P02751-15;P02751-3;P02751-7	0.174118	0.174118	7.28062e-05	9.02551e-05	176	P02751;P02751-15;P02751-3;P02751-7	FN1	Fibronectin;Isoform 15 of Fibronectin;Isoform 3 of Fibronectin;Isoform 7 of Fibronectin	FINC_HUMAN	1	12.8275	1.12827	Dengue	QC	NaN	NaN	NaN	149.29	0.0721208
Dengue / QC	_LVGGDNLC[Carbamidomethyl (C)]SGR_	O43866	-0.435095	0.435095	7.28384e-05	9.02765e-05	172	O43866	CD5L	CD5 antigen-like	CD5L_HUMAN	1	-26.0355	0.739645	Dengue	QC	NaN	NaN	NaN	64.7092	0.118025
Dengue / QC	_A[Acetyl (Protein N-term)]DSRDPASDQMQHWK_	P04040	0.997872	0.997872	7.29987e-05	9.04565e-05	46	P04040	CAT	Catalase	CATA_HUMAN	1	99.7052	1.99705	Dengue	QC	NaN	NaN	NaN	32.4878	0.211506
Dengue / QC	_M[Oxidation (M)]GLAFESTK_	P04114	0.622486	0.622486	7.31521e-05	9.06094e-05	36	P04114	APOB	Apolipoprotein B-100	APOB_HUMAN	1	53.9526	1.53953	Dengue	QC	NaN	NaN	NaN	7.99796	0.204082
Dengue / QC	_TAAISGYSFK_	P03951	0.428598	0.428598	7.37634e-05	9.12915e-05	84	P03951	F11	Coagulation factor XI	FA11_HUMAN	1	34.5925	1.34592	Dengue	QC	NaN	NaN	NaN	77.9822	0.107249
Dengue / QC	_LKQVLLHQQAK_	E7ER44;P02788	0.281246	0.281246	7.44048e-05	9.19909e-05	24	E7ER44;P02788	LTF	Lactotransferrin	E7ER44_HUMAN;TRFL_HUMAN	1	21.5244	1.21524	Dengue	QC	NaN	NaN	NaN	17.061	0.261622
Dengue / QC	_NNLELSTPLK_	P07225	0.291341	0.291341	7.49539e-05	9.26127e-05	20	P07225	PROS1	Vitamin K-dependent protein S	PROS_HUMAN	1	22.3777	1.22378	Dengue	QC	NaN	NaN	NaN	7.54372	0.19888
Dengue / QC	_DGTVLC[Carbamidomethyl (C)]ELINALYPEGQAPVK_	P37802;X6RJP6	-1.47335	1.47335	7.5377e-05	9.30973e-05	12	P37802;X6RJP6	TAGLN2	Transgelin-2;Transgelin-2 (Fragment)	TAGL2_HUMAN;X6RJP6_HUMAN	1	-63.9854	0.360146	Dengue	QC	NaN	NaN	NaN	5.78508	0.181475
Dengue / QC	_YVGGQEHFAHLLILRDTK_	P02763	1.0485	1.0485	7.66717e-05	9.45607e-05	160	P02763	ORM1	Alpha-1-acid glycoprotein 1	A1AG1_HUMAN	1	106.838	2.06838	Dengue	QC	NaN	NaN	NaN	149.443	0.221073
Dengue / QC	_STVISYEC[Carbamidomethyl (C)]C[Carbamidomethyl (C)]PGYEK_	Q15582	0.781808	0.781808	7.7444e-05	9.53961e-05	38	Q15582	TGFBI	Transforming growth factor-beta-induced protein ig-h3	BGH3_HUMAN	1	71.9284	1.71928	Dengue	QC	NaN	NaN	NaN	29.4236	0.196719
Dengue / QC	_TKELTSELKENFIR_	P80188	1.02673	1.02673	7.82722e-05	9.63768e-05	40	P80188	LCN2	Neutrophil gelatinase-associated lipocalin	NGAL_HUMAN	1	103.74	2.0374	Dengue	QC	NaN	NaN	NaN	26.1854	0.222345
Dengue / QC	_TDGEGALSEPSATVTIEELAAPPPPVLM[Oxidation (M)]HHGESSQVLHPGNK_	P04217	0.505824	0.505824	7.8292e-05	9.63815e-05	142	P04217	A1BG	Alpha-1B-glycoprotein	A1BG_HUMAN	1	41.9934	1.41993	Dengue	QC	NaN	NaN	NaN	100.859	0.10095
Dengue / QC	_ENLDRDIALMK_	P00734	-0.275848	0.275848	7.86329e-05	9.67471e-05	172	P00734	F2	Prothrombin	THRB_HUMAN	1	-17.4035	0.825965	Dengue	QC	NaN	NaN	NaN	92.2983	0.0616779
Dengue / QC	_ELNQAGQETLVTGWGYHSSR_	E7END6;P04070;P04070-2	0.305428	0.305428	7.9186e-05	9.7323e-05	142	E7END6;P04070;P04070-2	PROC	Vitamin K-dependent protein C;Vitamin K-dependent protein C;Isoform 2 of Vitamin K-dependent protein C	E7END6_HUMAN;PROC_HUMAN;PROC_HUMAN	1	23.5786	1.23579	Dengue	QC	NaN	NaN	NaN	83.0114	0.0609758
Dengue / QC	_PC[Carbamidomethyl (C)]GHPGDTPFGTFTLTGGNVFEYGVK_	P08603	7.95986	7.95986	7.93914e-05	9.75556e-05	24	P08603	CFH	Complement factor H	CFAH_HUMAN	1	24797.5	248.975	Dengue	QC	NaN	NaN	NaN	8.95881	0.571278
Dengue / QC	_GISLANWMC[Carbamidomethyl (C)]LAK_	P61626	0.873395	0.873395	7.94109e-05	9.75596e-05	60	P61626	LYZ	Lysozyme C	LYSC_HUMAN	1	83.1968	1.83197	Dengue	QC	NaN	NaN	NaN	48.1303	0.180703
Dengue / QC	_VPFDAATLHTSTAM[Oxidation (M)]AAQHGMDDDGTGQK_	P06396	0.73403	0.73403	7.99207e-05	9.81259e-05	36	P06396	GSN	Gelsolin	GELS_HUMAN	1	66.3278	1.66328	Dengue	QC	NaN	NaN	NaN	25.137	0.181099
Dengue / QC	_GRTLEIPGNSDPNMIPDGDFNSYVR_	P0C0L5	0.730451	0.730451	8.06727e-05	9.90089e-05	170	P0C0L5	C4B	Complement C4-B	CO4B_HUMAN	1	65.9157	1.65916	Dengue	QC	NaN	NaN	NaN	142.257	0.133108
Dengue / QC	_IPKSDVVYTDWK_	P02763	0.96058	0.96058	8.09262e-05	9.92796e-05	50	P02763	ORM1	Alpha-1-acid glycoprotein 1	A1AG1_HUMAN	1	94.6092	1.94609	Dengue	QC	NaN	NaN	NaN	38.0121	0.171384
Dengue / QC	_NTLYLQMSSLR_	A0A0J9YX35	-0.431174	0.431174	8.14205e-05	9.98047e-05	170	A0A0J9YX35	IGHV3-64D	Immunoglobulin heavy variable 3-64D	HV64D_HUMAN	1	-25.8342	0.741658	Dengue	QC	NaN	NaN	NaN	75.9762	0.102318
Dengue / QC	_LRYHGDPMPC[Carbamidomethyl (C)]PK_	P09871	0.406513	0.406513	8.24927e-05	0.000100955	84	P09871	C1S	Complement C1s subcomponent	C1S_HUMAN	1	32.5478	1.32548	Dengue	QC	NaN	NaN	NaN	46.0538	0.126077
Dengue / QC	_AFVNC[Carbamidomethyl (C)]DENSR_	P01833	0.836042	0.836042	8.25156e-05	0.000100962	120	P01833	PIGR	Polymeric immunoglobulin receptor	PIGR_HUMAN	1	78.5146	1.78515	Dengue	QC	NaN	NaN	NaN	98.0646	0.216601
Dengue / QC	_KIQC[Carbamidomethyl (C)]VDGEWTTLPTC[Carbamidomethyl (C)]VEQVK_	Q9BXR6	0.875756	0.875756	8.30926e-05	0.000101565	60	Q9BXR6	CFHR5	Complement factor H-related protein 5	FHR5_HUMAN	1	83.497	1.83497	Dengue	QC	NaN	NaN	NaN	48.0282	0.201648
Dengue / QC	_NILDRQDPPSVVVTSHQAPGEK_	P25311	-0.241192	0.241192	8.33233e-05	0.000101806	176	P25311	AZGP1	Zinc-alpha-2-glycoprotein	ZA2G_HUMAN	1	-15.3954	0.846046	Dengue	QC	NaN	NaN	NaN	74.7803	0.064069
Dengue / QC	_TVM[Oxidation (M)]VNIENPEGIPVKQDSLSSQNQLGVLPLSWDIPELVNMGQWK_	P01024	1.46033	1.46033	8.3596e-05	0.000102079	72	P01024	C3	Complement C3	CO3_HUMAN	1	175.172	2.75172	Dengue	QC	NaN	NaN	NaN	36.6188	0.25175
Dengue / QC	_AWQDC[Carbamidomethyl (C)]GMR_	Q9UGM5	1.60135	1.60135	8.35976e-05	0.000102079	16	Q9UGM5	FETUB	Fetuin-B	FETUB_HUMAN	1	203.426	3.03426	Dengue	QC	NaN	NaN	NaN	8.34332	0.263584
Dengue / QC	_ALVEQGFTVPEIK_	P04114	0.487301	0.487301	8.43907e-05	0.000103006	20	P04114	APOB	Apolipoprotein B-100	APOB_HUMAN	1	40.182	1.40182	Dengue	QC	NaN	NaN	NaN	4.63677	0.0800126
Dengue / QC	_C[Carbamidomethyl (C)]REILSVDC[Carbamidomethyl (C)]STNNPSQAK_	P10909;P10909-2;P10909-4;P10909-5	0.534346	0.534346	8.63418e-05	0.000105217	138	P10909;P10909-2;P10909-4;P10909-5	CLU	Clusterin;Isoform 2 of Clusterin;Isoform 4 of Clusterin;Isoform 5 of Clusterin	CLUS_HUMAN	1	44.8285	1.44829	Dengue	QC	NaN	NaN	NaN	87.9208	0.111172
Dengue / QC	_LSFVKVDSHFR_	P01023	-0.649832	0.649832	8.71629e-05	0.000106131	170	P01023	A2M	Alpha-2-macroglobulin	A2MG_HUMAN	1	-36.2645	0.637355	Dengue	QC	NaN	NaN	NaN	43.3272	0.154644
Dengue / QC	_SFTIEC[Carbamidomethyl (C)]R_	J3QQR8;J3QQX6;J3QRQ1;P13598	0.217838	0.217838	8.74273e-05	0.000106367	60	J3QQR8;J3QQX6;J3QRQ1;P13598	ICAM2	Intercellular adhesion molecule 2 (Fragment);Intercellular adhesion molecule 2 (Fragment);Intercellular adhesion molecule 2 (Fragment);Intercellular adhesion molecule 2	J3QQR8_HUMAN;J3QQX6_HUMAN;J3QRQ1_HUMAN;ICAM2_HUMAN	1	16.299	1.16299	Dengue	QC	NaN	NaN	NaN	42.1933	0.122344
Dengue / QC	_FSSHVGGTLGQFYQEVLWGSPAASDDGRR_	Q14624	0.329218	0.329218	8.76943e-05	0.000106628	146	Q14624	ITIH4	Inter-alpha-trypsin inhibitor heavy chain H4	ITIH4_HUMAN	1	25.6332	1.25633	Dengue	QC	NaN	NaN	NaN	110.497	0.0886744
Dengue / QC	_ADVLTTGAGNPVGDKLNVITVGPR_	P04040	1.56363	1.56363	8.80633e-05	0.000107033	30	P04040	CAT	Catalase	CATA_HUMAN	1	195.597	2.95597	Dengue	QC	NaN	NaN	NaN	19.889	0.263701
Dengue / QC	_TGKAAQVTIQSSGTFSSK_	P01023	-0.7523	0.7523	8.87451e-05	0.000107796	146	P01023	A2M	Alpha-2-macroglobulin	A2MG_HUMAN	1	-40.6344	0.593656	Dengue	QC	NaN	NaN	NaN	46.1075	0.193541
Dengue / QC	_LELHVDGPPPRPQLR_	P04217	-0.260943	0.260943	8.88845e-05	0.000107944	176	P04217	A1BG	Alpha-1B-glycoprotein	A1BG_HUMAN	1	-16.5458	0.834542	Dengue	QC	NaN	NaN	NaN	57.6275	0.070529
Dengue / QC	_LLIYAASTLQSGVPSR_	A0A0C4DH67	-0.52963	0.52963	8.9449e-05	0.000108498	168	A0A0C4DH67	IGKV1-8	Immunoglobulin kappa variable 1-8	KV108_HUMAN	1	-30.7268	0.692732	Dengue	QC	NaN	NaN	NaN	100.898	0.110301
Dengue / QC	_SSSNEEVMFLTVQVKGPTQEFK_	P01023	0.918311	0.918311	9.03054e-05	0.000109377	94	P01023	A2M	Alpha-2-macroglobulin	A2MG_HUMAN	1	88.9901	1.8899	Dengue	QC	NaN	NaN	NaN	71.1761	0.180152
Dengue / QC	_ARPHAWPFMVSLQLR_	P08246	1.5625	1.5625	9.04652e-05	0.000109489	56	P08246	ELANE	Neutrophil elastase	ELNE_HUMAN	1	195.365	2.95365	Dengue	QC	NaN	NaN	NaN	33.7221	0.401531
Dengue / QC	_YNPIPSVQLMGNGFHFLAGEPR_	P13671	0.559934	0.559934	9.08928e-05	0.000109984	82	P13671	C6	Complement component C6	CO6_HUMAN	1	47.4202	1.4742	Dengue	QC	NaN	NaN	NaN	42.6199	0.134389
Dengue / QC	_FQSVFTVTR_	P02747	-0.290262	0.290262	9.16137e-05	0.000110745	176	P02747	C1QC	Complement C1q subcomponent subunit C	C1QC_HUMAN	1	-18.2247	0.817753	Dengue	QC	NaN	NaN	NaN	51.7127	0.0673372
Dengue / QC	_ELQETNAALQDVR_	G3XAP6;P49747	1.38	1.38	9.1667e-05	0.000110787	46	G3XAP6;P49747	COMP	Cartilage oligomeric matrix protein	G3XAP6_HUMAN;COMP_HUMAN	1	160.269	2.60269	Dengue	QC	NaN	NaN	NaN	29.6062	0.377742
Dengue / QC	_EELATFDPVDNIVFNMAAGSAPMQLHLR_	O95445	0.491843	0.491843	9.19039e-05	0.000111029	30	O95445	APOM	Apolipoprotein M	APOM_HUMAN	1	40.624	1.40624	Dengue	QC	NaN	NaN	NaN	20.4431	0.144826
Dengue / QC	_TETQEKNPLPSKETIEQEK_	P62328	1.05319	1.05319	9.24992e-05	0.000111681	20	P62328	TMSB4X	Thymosin beta-4	TYB4_HUMAN	1	107.512	2.07512	Dengue	QC	NaN	NaN	NaN	13.629	0.178769
Dengue / QC	_VTISVDTSK_	P06331	-0.743806	0.743806	9.27689e-05	0.000111939	174	P06331	IGHV4-34	Immunoglobulin heavy variable 4-34	HV434_HUMAN	1	-40.2838	0.597162	Dengue	QC	NaN	NaN	NaN	42.486	0.182273
Dengue / QC	_AAFTEC[Carbamidomethyl (C)]C[Carbamidomethyl (C)]QAADKAAC[Carbamidomethyl (C)]LLPK_	P02768	0.47765	0.47765	9.3327e-05	0.000112523	176	P02768	ALB	Serum albumin	ALBU_HUMAN	1	39.2474	1.39247	Dengue	QC	NaN	NaN	NaN	92.262	0.123572
Dengue / QC	_SLTLGIEPVSPTSLR_	Q6EMK4	0.281318	0.281318	9.34863e-05	0.00011267	136	Q6EMK4	VASN	Vasorin	VASN_HUMAN	1	21.5304	1.2153	Dengue	QC	NaN	NaN	NaN	105.429	0.0972193
Dengue / QC	_FSPATHPSEGLEENYC[Carbamidomethyl (C)]RNPDNDPQGPWC[Carbamidomethyl (C)]YTTDPEK_	P00747	0.163833	0.163833	9.39317e-05	0.000113093	140	P00747	PLG	Plasminogen	PLMN_HUMAN	1	12.0259	1.12026	Dengue	QC	NaN	NaN	NaN	66.0139	0.0494213
Dengue / QC	_AGC[Carbamidomethyl (C)]VAESTAVC[Carbamidomethyl (C)]R_	Q9Y6R7	0.782792	0.782792	9.39819e-05	0.000113109	96	Q9Y6R7	FCGBP	IgGFc-binding protein	FCGBP_HUMAN	1	72.0457	1.72046	Dengue	QC	NaN	NaN	NaN	46.3626	0.382773
Dengue / QC	_AMAVEDIISR_	P07357	-0.521704	0.521704	9.42881e-05	0.000113432	160	P07357	C8A	Complement component C8 alpha chain	CO8A_HUMAN	1	-30.3452	0.696548	Dengue	QC	NaN	NaN	NaN	44.201	0.114303
Dengue / QC	_TQVNTQAEQLRR_	P06727	0.733328	0.733328	9.44797e-05	0.000113617	76	P06727	APOA4	Apolipoprotein A-IV	APOA4_HUMAN	1	66.247	1.66247	Dengue	QC	NaN	NaN	NaN	60.9209	0.159325
Dengue / QC	_FTDSENVC[Carbamidomethyl (C)]QERDADPDTFFAK_	P43652	0.560435	0.560435	9.45738e-05	0.000113707	94	P43652	AFM	Afamin	AFAM_HUMAN	1	47.4713	1.47471	Dengue	QC	NaN	NaN	NaN	54.9455	0.102285
Dengue / QC	_WEM[Oxidation (M)]PFDPQDTHQSR_	P01011	1.18733	1.18733	9.46049e-05	0.000113722	30	P01011	SERPINA3	Alpha-1-antichymotrypsin	AACT_HUMAN	1	127.73	2.2773	Dengue	QC	NaN	NaN	NaN	23.1883	0.258835
Dengue / QC	_AAANQMR_	P0C0L5	1.30204	1.30204	9.48499e-05	0.000113949	38	P0C0L5	C4B	Complement C4-B	CO4B_HUMAN	1	146.578	2.46578	Dengue	QC	NaN	NaN	NaN	27.121	0.252252
Dengue / QC	_EHLVQATPENLQEAR_	Q06033;Q06033-2	-0.429484	0.429484	9.61889e-05	0.000115488	158	Q06033;Q06033-2	ITIH3	Inter-alpha-trypsin inhibitor heavy chain H3;Isoform 2 of Inter-alpha-trypsin inhibitor heavy chain H3	ITIH3_HUMAN	1	-25.7472	0.742528	Dengue	QC	NaN	NaN	NaN	45.246	0.124
Dengue / QC	_YRLHDNQNGWSGDSAPVELILSDETLPAPEFSPEPESGR_	P04217	0.704552	0.704552	9.62995e-05	0.000115598	146	P04217	A1BG	Alpha-1B-glycoprotein	A1BG_HUMAN	1	62.9639	1.62964	Dengue	QC	NaN	NaN	NaN	98.7289	0.13153
Dengue / QC	_IKNQADC[Carbamidomethyl (C)]IPFFR_	P05164;P05164-2;P05164-3	1.208	1.208	9.64182e-05	0.000115717	34	P05164;P05164-2;P05164-3	MPO	Myeloperoxidase;Isoform H14 of Myeloperoxidase;Isoform H7 of Myeloperoxidase	PERM_HUMAN	1	131.017	2.31017	Dengue	QC	NaN	NaN	NaN	20.5642	0.285955
Dengue / QC	_GDEC[Carbamidomethyl (C)]QLC[Carbamidomethyl (C)]EVENR_	O75882;O75882-2	0.422726	0.422726	9.77281e-05	0.000117173	96	O75882;O75882-2	ATRN	Attractin;Isoform 2 of Attractin	ATRN_HUMAN	1	34.0458	1.34046	Dengue	QC	NaN	NaN	NaN	14.6933	0.118372
Dengue / QC	_ENQLEVLEVSWLHGLK_	P02750	0.3597	0.3597	9.77979e-05	0.000117233	144	P02750	LRG1	Leucine-rich alpha-2-glycoprotein	A2GL_HUMAN	1	28.3159	1.28316	Dengue	QC	NaN	NaN	NaN	100.919	0.12408
Dengue / QC	_SNVSDAVAQSTR_	P60174;P60174-1	2.46235	2.46235	9.83657e-05	0.00011782	22	P60174;P60174-1	TPI1	Triosephosphate isomerase;Isoform 2 of Triosephosphate isomerase	TPIS_HUMAN	1	451.113	5.51113	Dengue	QC	NaN	NaN	NaN	14.7361	0.484129
Dengue / QC	_VTM[Oxidation (M)]TTDTSTSTAYMELR_	A0A0C4DH31	1.14467	1.14467	0.000100451	0.000120127	52	A0A0C4DH31	IGHV1-18	Immunoglobulin heavy variable 1-18	HV118_HUMAN	1	121.096	2.21096	Dengue	QC	NaN	NaN	NaN	34.2906	0.277671
Dengue / QC	_DKGQAGLQR_	P0C0L5	0.891745	0.891745	0.000100734	0.000120441	100	P0C0L5	C4B	Complement C4-B	CO4B_HUMAN	1	85.5419	1.85542	Dengue	QC	NaN	NaN	NaN	64.9448	0.215955
[truncated: 17,508 more rows]
