# Supplementary material for: Re-mining serum proteomics data reveals extensive post-translational modifications upon Zika and dengue infection
Source: Royal Society of Chemistry journal article supplement (doi:10.1039/d2mo00258b), 2023-02-15
Supplement: d2mo00258b5.xlsx [file d2mo00258b5.xlsx]

## Sheet: 2020_09_13_Zika_PTM_HTRMS_Hex_S
Comparison (group1/group2)	Group	ProteinGroups	AVG Log2 Ratio	Absolute AVG Log2 Ratio	Pvalue	Qvalue	# of Ratios	UniProtIds	Genes	ProteinDescriptions	ProteinNames	# Unique Total Peptides	% Change	Ratio	Condition Numerator	Condition Denominator	GO Cellular Component	GO Molecular Function	GO Biological Process	Degrees Of Freedom	Standard Error
Dengue / QC	_VEKFDLVPVPTNLYGDFFTGDAYVILK_	P06396	1.69553	1.69553	7.80561e-48	4.59438e-44	158	P06396	GSN	Gelsolin	GELS_HUMAN	1	223.896	3.23896	Dengue	QC	NaN	NaN	NaN	142.157	0.0726564
Dengue / QC	_DVDKEFYLFPTVFDENESLLLEDNIR_	P00450	1.7213	1.7213	4.48847e-47	1.32096e-43	168	P00450	CP	Ceruloplasmin	CERU_HUMAN	1	229.734	3.29734	Dengue	QC	NaN	NaN	NaN	163.277	0.0827743
Dengue / QC	_YSQPEDSLIPFFEITVPESQLTVSQFTLPK_	P04114	1.22406	1.22406	3.19273e-41	3.75848e-38	170	P04114	APOB	Apolipoprotein B-100	APOB_HUMAN	1	133.603	2.33603	Dengue	QC	NaN	NaN	NaN	120.709	0.060523
Dengue / QC	_TIDQMLNSELQWPVPDIYLR_	P04114	1.18911	1.18911	2.88389e-40	2.8291e-37	114	P04114	APOB	Apolipoprotein B-100	APOB_HUMAN	1	128.012	2.28012	Dengue	QC	NaN	NaN	NaN	100.677	0.0631423
Dengue / QC	_VFPLSLC[Carbamidomethyl (C)]STQPDGNVVIAC[Carbamidomethyl (C)]LVQGFFPQEPLSVTWSESGQGVTAR_	P01876	1.93085	1.93085	9.10545e-40	7.65638e-37	160	P01876	IGHA1	Immunoglobulin heavy constant alpha 1	IGHA1_HUMAN	1	281.279	3.81279	Dengue	QC	NaN	NaN	NaN	151.608	0.110551
Dengue / QC	_TAMDVFVC[Carbamidomethyl (C)]TYFMPAAQLPELPDVELPTNKDVC[Carbamidomethyl (C)]DPGNTK_	P02774;P02774-3	1.22491	1.22491	2.14734e-36	1.05327e-33	170	P02774;P02774-3	GC	Vitamin D-binding protein;Isoform 3 of Vitamin D-binding protein	VTDB_HUMAN	1	133.741	2.33741	Dengue	QC	NaN	NaN	NaN	148.155	0.0760443
Dengue / QC	_AKSPPTMVDSLLAVTLAGNLGLTFLR_	Q96PD5	1.70021	1.70021	2.97984e-36	1.2566e-33	118	Q96PD5	PGLYRP2	N-acetylmuramoyl-L-alanine amidase	PGRP2_HUMAN	1	224.949	3.24949	Dengue	QC	NaN	NaN	NaN	108.265	0.0883485
Dengue / QC	_TAGPDQTEM[Oxidation (M)]TIEGLQPTVEYVVSVYAQNPSGESQPLVQTAVTTIPAPTDLK_	P02751-14;P02751-8	0.927944	0.927944	2.98886e-36	1.2566e-33	94	P02751-14;P02751-8	FN1	Isoform 14 of Fibronectin;Isoform 8 of Fibronectin	FINC_HUMAN	1	90.2563	1.90256	Dengue	QC	NaN	NaN	NaN	69.2845	0.262911
Dengue / QC	_SGLSTGWTQLSKLLELTGPKSLPAPWLSM[Oxidation (M)]APVSWITPGLK_	P04217	1.04694	1.04694	1.75319e-35	6.87951e-33	64	P04217	A1BG	Alpha-1B-glycoprotein	A1BG_HUMAN	1	106.615	2.06615	Dengue	QC	NaN	NaN	NaN	48.9477	0.163666
Dengue / QC	_FFESFGDLSTPDAVM[Oxidation (M)]GNPK_	P68871	0.972688	0.972688	2.2277e-35	8.19517e-33	82	P68871	HBB	Hemoglobin subunit beta	HBB_HUMAN	1	96.2494	1.96249	Dengue	QC	NaN	NaN	NaN	69.8948	0.0418512
Dengue / QC	_LYLKHQM[Oxidation (M)]DLVATLSQLGLQELFQAPDLR_	P08697	1.22183	1.22183	7.61766e-35	2.49097e-32	94	P08697	SERPINF2	Alpha-2-antiplasmin	A2AP_HUMAN	1	133.242	2.33242	Dengue	QC	NaN	NaN	NaN	82.8784	0.126908
Dengue / QC	_TAGPDQTEMTIEGLQPTVEYVVSVYAQNPSGESQPLVQTAVTTIPAPTDLK_	P02751-14;P02751-8	1.49957	1.49957	9.89005e-34	2.53099e-31	162	P02751-14;P02751-8	FN1	Isoform 14 of Fibronectin;Isoform 8 of Fibronectin	FINC_HUMAN	1	182.759	2.82759	Dengue	QC	NaN	NaN	NaN	149.721	0.0934341
Dengue / QC	_PYTFHSHGITYYK_	P00450	-0.287427	0.287427	2.03475e-33	4.79063e-31	84	P00450	CP	Ceruloplasmin	CERU_HUMAN	1	-18.0638	0.819362	Dengue	QC	NaN	NaN	NaN	43.6913	0.163811
Dengue / QC	_TLADLTLLDSPIKVPLLLSEPINIIDALEMR_	P04114	2.09426	2.09426	2.70157e-33	6.11595e-31	140	P04114	APOB	Apolipoprotein B-100	APOB_HUMAN	1	327.006	4.27006	Dengue	QC	NaN	NaN	NaN	112.174	0.136798
Dengue / QC	_LYLKHQMDLVATLSQLGLQELFQAPDLR_	P08697	1.68779	1.68779	1.43425e-32	3.12666e-30	158	P08697	SERPINF2	Alpha-2-antiplasmin	A2AP_HUMAN	1	222.162	3.22162	Dengue	QC	NaN	NaN	NaN	146.214	0.103037
Dengue / QC	_SGAGTEDSAC[Carbamidomethyl (C)]IPWAYYSTVDQVKDLYSGLIGPLIVC[Carbamidomethyl (C)]R_	P00450	1.59064	1.59064	2.77505e-32	5.83355e-30	164	P00450	CP	Ceruloplasmin	CERU_HUMAN	1	201.183	3.01183	Dengue	QC	NaN	NaN	NaN	149.112	0.107986
Dengue / QC	_DVFLGMFLYEYAR_	P02768	1.02552	1.02552	6.36228e-32	1.24828e-29	176	P02768	ALB	Serum albumin	ALBU_HUMAN	1	103.569	2.03569	Dengue	QC	NaN	NaN	NaN	171.79	0.0723751
Dengue / QC	_YDPSLKPLSVSYDQATSLR_	P00918	1.80711	1.80711	7.95971e-32	1.51132e-29	80	P00918	CA2	Carbonic anhydrase 2	CAH2_HUMAN	1	249.941	3.49941	Dengue	QC	NaN	NaN	NaN	61.0967	0.061156
Dengue / QC	_LRLEPGKEYLIM[Oxidation (M)]GLDGATYDLEGHPQYLLDSNSWIEEMPSER_	P0C0L5	0.697397	0.697397	1.63988e-31	2.92495e-29	126	P0C0L5	C4B	Complement C4-B	CO4B_HUMAN	1	62.1576	1.62158	Dengue	QC	NaN	NaN	NaN	87.8044	0.160282
Dengue / QC	_ESATITC[Carbamidomethyl (C)]LVTGFSPADVFVQWMQR_	P01871	1.30666	1.30666	2.49595e-31	4.19748e-29	172	P01871	IGHM	Immunoglobulin heavy constant mu	IGHM_HUMAN	1	147.368	2.47368	Dengue	QC	NaN	NaN	NaN	134.159	0.0855572
Dengue / QC	_IHEDSDSALQLQDFYQEVANPLLTAVTFEYPSNAVEEVTQNNFR_	Q14624	1.51441	1.51441	2.77853e-31	4.54289e-29	158	Q14624	ITIH4	Inter-alpha-trypsin inhibitor heavy chain H4	ITIH4_HUMAN	1	185.681	2.85681	Dengue	QC	NaN	NaN	NaN	148.069	0.0984073
Dengue / QC	_TAGYGINILGMDPLSTPFDNEFYNGLC[Carbamidomethyl (C)]NR_	P02748	1.04022	1.04022	3.12342e-30	4.27546e-28	164	P02748	C9	Complement component C9	CO9_HUMAN	1	105.655	2.05655	Dengue	QC	NaN	NaN	NaN	143.511	0.0718864
Dengue / QC	_QGQIIYNWQGAQSTQDEVAASAILTAQLDEELGGTPVQSR_	P06396	1.12995	1.12995	3.55249e-29	4.02114e-27	136	P06396	GSN	Gelsolin	GELS_HUMAN	1	118.851	2.18851	Dengue	QC	NaN	NaN	NaN	119.266	0.0804257
Dengue / QC	_GGPLDGTYR_	P00918	1.22176	1.22176	4.02073e-29	4.3826e-27	62	P00918	CA2	Carbonic anhydrase 2	CAH2_HUMAN	1	133.231	2.33231	Dengue	QC	NaN	NaN	NaN	49.5521	0.0555022
Dengue / QC	_ANPTVTLFPPSSEELQANKATLVC[Carbamidomethyl (C)]LISDFYPGAVTVAWK_	A0A0B4J231;B9A064	1.89494	1.89494	3.96979e-29	4.3826e-27	166	A0A0B4J231;B9A064	IGLL5	Immunoglobulin lambda-like polypeptide 5	A0A0B4J231_HUMAN;IGLL5_HUMAN	1	271.906	3.71906	Dengue	QC	NaN	NaN	NaN	150.47	0.133546
Dengue / QC	_LHLETDSLALVALGALDTALYAAGSK_	P0C0L5	1.03925	1.03925	5.81423e-29	6.00396e-27	174	P0C0L5	C4B	Complement C4-B	CO4B_HUMAN	1	105.515	2.05515	Dengue	QC	NaN	NaN	NaN	162.31	0.0817851
Dengue / QC	_FFESFGDLSTPDAVMGNPK_	P68871	0.645676	0.645676	1.42003e-28	1.37022e-26	160	P68871	HBB	Hemoglobin subunit beta	HBB_HUMAN	1	56.4472	1.56447	Dengue	QC	NaN	NaN	NaN	134.567	0.0482964
Dengue / QC	_TVMVNIENPEGIPVKQDSLSSQNQLGVLPLSWDIPELVNMGQWK_	P01024	1.13877	1.13877	1.57612e-28	1.4963e-26	172	P01024	C3	Complement C3	CO3_HUMAN	1	120.193	2.20193	Dengue	QC	NaN	NaN	NaN	148.298	0.0849779
Dengue / QC	_KAGTELVNFLSYFVELGTQPATQ_	P02652;V9GYM3	1.21722	1.21722	1.63028e-28	1.52315e-26	120	P02652;V9GYM3	APOA2	Apolipoprotein A-II	APOA2_HUMAN;V9GYM3_HUMAN	1	132.499	2.32499	Dengue	QC	NaN	NaN	NaN	100.602	0.089409
Dengue / QC	_DLEVVAATPTSLLISWDAPAVTVR_	P02751;P02751-15;P02751-3;P02751-7	1.36939	1.36939	3.00808e-28	2.52936e-26	168	P02751;P02751-15;P02751-3;P02751-7	FN1	Fibronectin;Isoform 15 of Fibronectin;Isoform 3 of Fibronectin;Isoform 7 of Fibronectin	FINC_HUMAN	1	158.362	2.58362	Dengue	QC	NaN	NaN	NaN	163.215	0.10475
Dengue / QC	_DQYYNIDVPSR_	Q92954-3	1.39493	1.39493	4.47726e-28	3.71171e-26	76	Q92954-3	PRG4	Isoform C of Proteoglycan 4	PRG4_HUMAN	1	162.976	2.62976	Dengue	QC	NaN	NaN	NaN	58.0041	0.0860102
Dengue / QC	_MPC[Carbamidomethyl (C)]AEDY[Hex]LS[Hex]VVLNQLC[Carbamidomethyl (C)]VLHEKTPVSDR_	P02768	0.804315	0.804315	5.57317e-28	4.55606e-26	106	P02768	ALB	Serum albumin	ALBU_HUMAN	1	74.6317	1.74632	Dengue	QC	NaN	NaN	NaN	79.6204	0.0970893
Dengue / QC	_EVYMPSSIFQDDFVIPDISEPGTWK_	P0C0L5	0.994119	0.994119	1.13704e-27	8.69171e-26	174	P0C0L5	C4B	Complement C4-B	CO4B_HUMAN	1	99.1864	1.99186	Dengue	QC	NaN	NaN	NaN	132.064	0.0751368
Dengue / QC	_KDDIMLDEGMLQSLMELPDQYNYGMYAK_	P07357	1.17788	1.17788	1.25667e-27	9.36295e-26	94	P07357	C8A	Complement component C8 alpha chain	CO8A_HUMAN	1	126.244	2.26244	Dengue	QC	NaN	NaN	NaN	70.6533	0.0676351
Dengue / QC	_SWVPHTFESELSDPVELLVAES_	P04217	0.813267	0.813267	3.19628e-27	2.29431e-25	176	P04217	A1BG	Alpha-1B-glycoprotein	A1BG_HUMAN	1	75.7186	1.75719	Dengue	QC	NaN	NaN	NaN	139.912	0.0670495
Dengue / QC	_AAPSVTLFPPSSEELQANKATLVC[Carbamidomethyl (C)]LISDFYPGAVTVAWK_	P0DOY2	1.9334	1.9334	4.97198e-27	3.40292e-25	170	P0DOY2	IGLC2	Immunoglobulin lambda constant 2	IGLC2_HUMAN	1	281.954	3.81954	Dengue	QC	NaN	NaN	NaN	145.126	0.151161
Dengue / QC	_VLGAFSDGLAHLDNLK_	P68871	2.12051	2.12051	6.51962e-27	4.26383e-25	34	P68871	HBB	Hemoglobin subunit beta	HBB_HUMAN	1	334.847	4.34847	Dengue	QC	NaN	NaN	NaN	28.4712	0.0483247
Dengue / QC	_GTELQHLLHAVVPGPWQEDVADAEEC[Carbamidomethyl (C)]AGR_	G3XAK1;P26927	1.15337	1.15337	8.57084e-27	5.48347e-25	122	G3XAK1;P26927	MST1	Hepatocyte growth factor-like protein	G3XAK1_HUMAN;HGFL_HUMAN	1	122.433	2.22433	Dengue	QC	NaN	NaN	NaN	111.918	0.104783
Dengue / QC	_VQLSNDFDEYIMAIEQTIK_	P01024	0.853704	0.853704	9.62376e-27	6.09091e-25	176	P01024	C3	Complement C3	CO3_HUMAN	1	80.7135	1.80714	Dengue	QC	NaN	NaN	NaN	115.379	0.0616788
Dengue / QC	_YGGGFYSTQDTINAIEGLTEYSLLVK_	P01031	0.920197	0.920197	1.04167e-26	6.52262e-25	146	P01031	C5	Complement C5	CO5_HUMAN	1	89.2374	1.89237	Dengue	QC	NaN	NaN	NaN	135.431	0.0717842
Dengue / QC	_VPLLLSEPINIIDALEMR_	P04114	0.841343	0.841343	1.89605e-26	1.13879e-24	162	P04114	APOB	Apolipoprotein B-100	APOB_HUMAN	1	79.1717	1.79172	Dengue	QC	NaN	NaN	NaN	140.476	0.0706822
Dengue / QC	_DC[Carbamidomethyl (C)]QDIANK_	P02679;P02679-2	5.64478	5.64478	2.7891e-26	1.65825e-24	44	P02679;P02679-2	FGG	Fibrinogen gamma chain;Isoform Gamma-A of Fibrinogen gamma chain	FIBG_HUMAN	1	4903.22	50.0322	Dengue	QC	NaN	NaN	NaN	35.8742	0.20539
Dengue / QC	_QDSLSSQNQLGVLPLSWDIPELVNMGQWK_	P01024	1.10195	1.10195	3.7281e-26	2.19436e-24	150	P01024	C3	Complement C3	CO3_HUMAN	1	114.644	2.14644	Dengue	QC	NaN	NaN	NaN	135.933	0.080316
Dengue / QC	_TAMDVFVC[Carbamidomethyl (C)]TYFMPAAQLPELPDVELPTNK_	P02774;P02774-3	1.14314	1.14314	8.07599e-26	4.48446e-24	128	P02774;P02774-3	GC	Vitamin D-binding protein;Isoform 3 of Vitamin D-binding protein	VTDB_HUMAN	1	120.862	2.20862	Dengue	QC	NaN	NaN	NaN	82.9857	0.0775239
Dengue / QC	_SLFTDLVAEKDLFHC[Carbamidomethyl (C)]VSFTLPR_	P20742	2.3882	2.3882	8.75128e-26	4.76945e-24	58	P20742	PZP	Pregnancy zone protein	PZP_HUMAN	1	423.505	5.23505	Dengue	QC	NaN	NaN	NaN	49.0334	0.121369
Dengue / QC	_ATLVC[Carbamidomethyl (C)]LISDFYPGAVTVAWK_	P0DOY2	1.22468	1.22468	9.89024e-26	5.34073e-24	176	P0DOY2	IGLC2	Immunoglobulin lambda constant 2	IGLC2_HUMAN	1	133.703	2.33703	Dengue	QC	NaN	NaN	NaN	140.312	0.0867744
Dengue / QC	_YRGDQDATMSILDISMMTGFAPDTDDLK_	P01024	1.11466	1.11466	1.20216e-25	6.37468e-24	140	P01024	C3	Complement C3	CO3_HUMAN	1	116.544	2.16544	Dengue	QC	NaN	NaN	NaN	124.591	0.0877963
Dengue / QC	_ITTGGDVINNGLWNM[Oxidation (M)]VSVEELEHSISIK_	P07225	0.786014	0.786014	1.62018e-25	8.22104e-24	54	P07225	PROS1	Vitamin K-dependent protein S	PROS_HUMAN	1	72.4303	1.7243	Dengue	QC	NaN	NaN	NaN	31.7887	0.123959
Dengue / QC	_FGGVLHLSDLDDDGLDEIIMAAPLR_	P80108	1.03383	1.03383	1.6885e-25	8.42247e-24	160	P80108	GPLD1	Phosphatidylinositol-glycan-specific phospholipase D	PHLD_HUMAN	1	104.745	2.04745	Dengue	QC	NaN	NaN	NaN	137.971	0.0859574
Dengue / QC	_GAVYVYFGSK_	P80108	1.2808	1.2808	3.97005e-25	1.8256e-23	70	P80108	GPLD1	Phosphatidylinositol-glycan-specific phospholipase D	PHLD_HUMAN	1	142.974	2.42974	Dengue	QC	NaN	NaN	NaN	57.8205	0.11053
Dengue / QC	_LSLESLTSYFSIESSTKGDVK_	P04114	0.793282	0.793282	7.97698e-25	3.58416e-23	144	P04114	APOB	Apolipoprotein B-100	APOB_HUMAN	1	73.3013	1.73301	Dengue	QC	NaN	NaN	NaN	137.943	0.0735226
Dengue / QC	_DGWHSWPIAHQWPQGPSAVDAAFSWEEK_	P02790	1.17563	1.17563	1.08497e-24	4.76577e-23	144	P02790	HPX	Hemopexin	HEMO_HUMAN	1	125.891	2.25891	Dengue	QC	NaN	NaN	NaN	124.827	0.0903466
Dengue / QC	_SDLGAVISLLLWGR_	P00739	1.09644	1.09644	1.29212e-24	5.5514e-23	130	P00739	HPR	Haptoglobin-related protein	HPTR_HUMAN	1	113.827	2.13827	Dengue	QC	NaN	NaN	NaN	106.018	0.108308
Dengue / QC	_LRVDPVNFK_	P69905	1.93104	1.93104	1.61538e-24	6.84036e-23	42	P69905	HBA1	Hemoglobin subunit alpha	HBA_HUMAN	1	281.33	3.8133	Dengue	QC	NaN	NaN	NaN	27.9721	0.0596184
Dengue / QC	_VADALTNAVAHVDDM[Oxidation (M)]PNALSALSDLHAHK_	P69905	2.08831	2.08831	1.7333e-24	7.23562e-23	60	P69905	HBA1	Hemoglobin subunit alpha	HBA_HUMAN	1	325.251	4.25251	Dengue	QC	NaN	NaN	NaN	45.4331	0.0643318
Dengue / QC	_VPTADLEDVLPLAEDITNILSK_	P02774;P02774-3	0.996268	0.996268	1.93546e-24	7.91119e-23	176	P02774;P02774-3	GC	Vitamin D-binding protein;Isoform 3 of Vitamin D-binding protein	VTDB_HUMAN	1	99.4833	1.99483	Dengue	QC	NaN	NaN	NaN	170.882	0.0875574
Dengue / QC	_YEVSVYALKDTLTSRPAQGVVTTLENVSPPR_	P02751;P02751-15;P02751-3;P02751-7	2.64215	2.64215	4.2775e-24	1.70117e-22	48	P02751;P02751-15;P02751-3;P02751-7	FN1	Fibronectin;Isoform 15 of Fibronectin;Isoform 3 of Fibronectin;Isoform 7 of Fibronectin	FINC_HUMAN	1	524.26	6.2426	Dengue	QC	NaN	NaN	NaN	42.3078	0.113811
Dengue / QC	_WNPEVDC[Carbamidomethyl (C)]TEKR_	Q9BXR6	1.03618	1.03618	4.83122e-24	1.89577e-22	32	Q9BXR6	CFHR5	Complement factor H-related protein 5	FHR5_HUMAN	1	105.079	2.05079	Dengue	QC	NaN	NaN	NaN	23.2668	0.183535
Dengue / QC	_TDGC[Carbamidomethyl (C)]QHFC[Carbamidomethyl (C)]LPGQESYTC[Carbamidomethyl (C)]SC[Carbamidomethyl (C)]AQGYR_	P22891;P22891-2	1.54527	1.54527	5.36855e-24	2.09267e-22	66	P22891;P22891-2	PROZ	Vitamin K-dependent protein Z;Isoform 2 of Vitamin K-dependent protein Z	PROZ_HUMAN	1	191.859	2.91859	Dengue	QC	NaN	NaN	NaN	45.455	0.122022
Dengue / QC	_HQMDLVATLSQLGLQELFQAPDLR_	P08697	1.03684	1.03684	1.34165e-23	4.90493e-22	168	P08697	SERPINF2	Alpha-2-antiplasmin	A2AP_HUMAN	1	105.173	2.05173	Dengue	QC	NaN	NaN	NaN	155.287	0.0857653
Dengue / QC	_GLPNVVTSAISLPNIR_	Q92954-3	1.45102	1.45102	1.39079e-23	5.05321e-22	78	Q92954-3	PRG4	Isoform C of Proteoglycan 4	PRG4_HUMAN	1	173.402	2.73402	Dengue	QC	NaN	NaN	NaN	56.8002	0.116164
Dengue / QC	_TLLLVGSPTWK_	P80108	1.15971	1.15971	1.59814e-23	5.70099e-22	86	P80108	GPLD1	Phosphatidylinositol-glycan-specific phospholipase D	PHLD_HUMAN	1	123.413	2.23413	Dengue	QC	NaN	NaN	NaN	71.6863	0.0885993
Dengue / QC	_EPGQDLVVLPLSITTDFIPSFR_	P01024	0.925818	0.925818	2.86042e-23	1.00217e-21	176	P01024	C3	Complement C3	CO3_HUMAN	1	89.9761	1.89976	Dengue	QC	NaN	NaN	NaN	140.174	0.077702
Dengue / QC	_LPEGSVSLIILLTDGDPTVGETNPR_	Q14624	1.05094	1.05094	4.14455e-23	1.4183e-21	110	Q14624	ITIH4	Inter-alpha-trypsin inhibitor heavy chain H4	ITIH4_HUMAN	1	107.187	2.07187	Dengue	QC	NaN	NaN	NaN	81.0352	0.0898629
Dengue / QC	_MGPTVSPIC[Carbamidomethyl (C)]LPGTSSDYNLMDGDLGLISGWGR_	P09871	0.684438	0.684438	6.06198e-23	2.0389e-21	172	P09871	C1S	Complement C1s subcomponent	C1S_HUMAN	1	60.7076	1.60708	Dengue	QC	NaN	NaN	NaN	109.922	0.0630267
Dengue / QC	_EC[Carbamidomethyl (C)]C[Carbamidomethyl (C)]EKPLLEKSHC[Carbamidomethyl (C)]IAEVEN[HexNAc]DEM[Oxidation (M)]PADLPSLAADFVESK_	P02768	0.171397	0.171397	6.63145e-23	2.20639e-21	134	P02768	ALB	Serum albumin	ALBU_HUMAN	1	12.6148	1.12615	Dengue	QC	NaN	NaN	NaN	62.0225	0.234315
Dengue / QC	_YQEDTC[Carbamidomethyl (C)]YGDAGSAFAVHDLEEDTWYATGILSFDK_	P00738	1.32228	1.32228	9.04224e-23	2.94048e-21	162	P00738	HP	Haptoglobin	HPT_HUMAN	1	150.06	2.5006	Dengue	QC	NaN	NaN	NaN	96.0433	0.0965935
Dengue / QC	_MDWLVPATC[Carbamidomethyl (C)]EPIQSVFFFSGDK_	P04004	1.14612	1.14612	1.02198e-22	3.2871e-21	104	P04004	VTN	Vitronectin	VTNC_HUMAN	1	121.318	2.21318	Dengue	QC	NaN	NaN	NaN	98.8189	0.0941297
Dengue / QC	_NGESVKLHLETDSLALVALGALDTALYAAGSK_	P0C0L5	1.63559	1.63559	1.37327e-22	4.3225e-21	142	P0C0L5	C4B	Complement C4-B	CO4B_HUMAN	1	210.715	3.10715	Dengue	QC	NaN	NaN	NaN	133.833	0.127504
Dengue / QC	_VETVDRFQILTLWLPDSLTTWEIHGLSLSK_	P0C0L5	2.41723	2.41723	2.49686e-22	7.65444e-21	74	P0C0L5	C4B	Complement C4-B	CO4B_HUMAN	1	434.144	5.34144	Dengue	QC	NaN	NaN	NaN	58.7523	0.132392
Dengue / QC	_QPNC[Carbamidomethyl (C)]DDPETEEAALVAIDYINQNLPWGYK_	P02765	0.855689	0.855689	3.09939e-22	9.30765e-21	170	P02765	AHSG	Alpha-2-HS-glycoprotein	FETUA_HUMAN	1	80.9623	1.80962	Dengue	QC	NaN	NaN	NaN	125.069	0.0738405
Dengue / QC	_TSTADYAM[Oxidation (M)]FK_	P02679;P02679-2	4.33847	4.33847	3.13314e-22	9.36126e-21	30	P02679;P02679-2	FGG	Fibrinogen gamma chain;Isoform Gamma-A of Fibrinogen gamma chain	FIBG_HUMAN	1	1923.06	20.2306	Dengue	QC	NaN	NaN	NaN	22.044	0.0981748
Dengue / QC	_ADSQAQLLLSTVVGVFTAPGLHLKQPFVQGLALYTPVVLPR_	P01019	0.867721	0.867721	3.43144e-22	1.02007e-20	150	P01019	AGT	Angiotensinogen	ANGT_HUMAN	1	82.4779	1.82478	Dengue	QC	NaN	NaN	NaN	137.341	0.0834443
Dengue / QC	_TTENYPNAGLIMNYC[Carbamidomethyl (C)]R_	P08519	1.90153	1.90153	3.71994e-22	1.09478e-20	42	P08519	LPA	Apolipoprotein(a)	APOA_HUMAN	1	273.61	3.7361	Dengue	QC	NaN	NaN	NaN	33.4679	0.102456
Dengue / QC	_LLSHC[Carbamidomethyl (C)]LLVTLAAHLPAEFTPAVHASLDKFLASVSTVLTSKYR_	P69905	2.87209	2.87209	5.18104e-22	1.50225e-20	38	P69905	HBA1	Hemoglobin subunit alpha	HBA_HUMAN	1	632.124	7.32124	Dengue	QC	NaN	NaN	NaN	28.0562	0.0866709
Dengue / QC	_FGM[Oxidation (M)]HFC[Carbamidomethyl (C)]GGTLISPEWVLTAAHC[Carbamidomethyl (C)]LEK_	P00747	-0.264482	0.264482	6.39771e-22	1.81918e-20	38	P00747	PLG	Plasminogen	PLMN_HUMAN	1	-16.7503	0.832497	Dengue	QC	NaN	NaN	NaN	23.8624	0.231693
Dengue / QC	_QVLLVGAPTYDDVSK_	P80108	0.793126	0.793126	8.79788e-22	2.4515e-20	60	P80108	GPLD1	Phosphatidylinositol-glycan-specific phospholipase D	PHLD_HUMAN	1	73.2825	1.73283	Dengue	QC	NaN	NaN	NaN	47.4965	0.0857456
Dengue / QC	_YIYPLDSLTWIEYWPR_	P01031	1.22887	1.22887	8.95573e-22	2.47481e-20	80	P01031	C5	Complement C5	CO5_HUMAN	1	134.383	2.34383	Dengue	QC	NaN	NaN	NaN	37.0888	0.0774822
Dengue / QC	_ALEFLQLHNGR_	P80108	1.4117	1.4117	1.42244e-21	3.84059e-20	48	P80108	GPLD1	Phosphatidylinositol-glycan-specific phospholipase D	PHLD_HUMAN	1	166.05	2.6605	Dengue	QC	NaN	NaN	NaN	42.2533	0.0956315
Dengue / QC	_MVC[Carbamidomethyl (C)]AGYK_	H0YAC1;P03952	1.22756	1.22756	1.56589e-21	4.20859e-20	92	H0YAC1;P03952	KLKB1	Plasma kallikrein (Fragment);Plasma kallikrein	H0YAC1_HUMAN;KLKB1_HUMAN	1	134.17	2.3417	Dengue	QC	NaN	NaN	NaN	84.4253	0.0871266
Dengue / QC	_MRKDDIMLDEGMLQSLMELPDQYNYGMYAK_	P07357	0.969252	0.969252	1.64028e-21	4.3885e-20	90	P07357	C8A	Complement component C8 alpha chain	CO8A_HUMAN	1	95.7826	1.95783	Dengue	QC	NaN	NaN	NaN	55.4625	0.0756788
Dengue / QC	_VQLSNDFDEYIM[Oxidation (M)]AIEQTIK_	P01024	1.14349	1.14349	2.44157e-21	6.27559e-20	176	P01024	C3	Complement C3	CO3_HUMAN	1	120.915	2.20915	Dengue	QC	NaN	NaN	NaN	144.331	0.0762722
Dengue / QC	_SSTSPTTNVLLSPLSVATALSALSLGAEQR_	P36955	0.982203	0.982203	2.48821e-21	6.34008e-20	176	P36955	SERPINF1	Pigment epithelium-derived factor	PEDF_HUMAN	1	97.548	1.97548	Dengue	QC	NaN	NaN	NaN	138.393	0.107804
Dengue / QC	_LGEVNTYAGDLQK_	P06727	0.904228	0.904228	2.54453e-21	6.42794e-20	98	P06727	APOA4	Apolipoprotein A-IV	APOA4_HUMAN	1	87.1542	1.87154	Dengue	QC	NaN	NaN	NaN	79.3446	0.0778184
Dengue / QC	_QAQQMVQPQSPVAVSQSKPGC[Carbamidomethyl (C)]YDNGK_	P02751;P02751-15;P02751-3;P02751-7	0.367189	0.367189	2.53971e-21	6.42794e-20	150	P02751;P02751-15;P02751-3;P02751-7	FN1	Fibronectin;Isoform 15 of Fibronectin;Isoform 3 of Fibronectin;Isoform 7 of Fibronectin	FINC_HUMAN	1	28.9838	1.28984	Dengue	QC	NaN	NaN	NaN	59.2794	0.325176
Dengue / QC	_EVYM[Oxidation (M)]PSSIFQDDFVIPDISEPGTWK_	P0C0L5	1.29459	1.29459	7.82278e-21	1.89485e-19	170	P0C0L5	C4B	Complement C4-B	CO4B_HUMAN	1	145.308	2.45308	Dengue	QC	NaN	NaN	NaN	154.722	0.0967558
Dengue / QC	_AYIFIDEAHITQALIWLSQR_	P01023	1.00436	1.00436	8.42082e-21	2.03135e-19	96	P01023	A2M	Alpha-2-macroglobulin	A2MG_HUMAN	1	100.605	2.00605	Dengue	QC	NaN	NaN	NaN	86.4558	0.0993483
Dengue / QC	_LTVDKSRWQQGNVFSC[Carbamidomethyl (C)]SVMHEALHNHYTQK_	P01857	5.98765	5.98765	9.19604e-21	2.20032e-19	48	P01857	IGHG1	Immunoglobulin heavy constant gamma 1	IGHG1_HUMAN	1	6245.44	63.4544	Dengue	QC	NaN	NaN	NaN	39.8612	0.345921
Dengue / QC	_VSWIRQPPGKALEWLAR_	A0A0C4DH43	1.80214	1.80214	1.00367e-20	2.39174e-19	52	A0A0C4DH43	IGHV2-70D	Immunoglobulin heavy variable 2-70D	HV70D_HUMAN	1	248.737	3.48737	Dengue	QC	NaN	NaN	NaN	45.8486	0.113199
Dengue / QC	_LREQLGPVTQEFWDNLEK_	P02647	1.33517	1.33517	1.15905e-20	2.73983e-19	68	P02647	APOA1	Apolipoprotein A-I	APOA1_HUMAN	1	152.304	2.52304	Dengue	QC	NaN	NaN	NaN	62.9563	0.0787765
Dengue / QC	_AVPPNNSNAAEDDLPTVELQGVVPR_	P00488	1.21799	1.21799	2.06342e-20	4.76285e-19	64	P00488	F13A1	Coagulation factor XIII A chain	F13A_HUMAN	1	132.622	2.32622	Dengue	QC	NaN	NaN	NaN	52.7744	0.119473
Dengue / QC	_DFHINLFQVLPWLK_	B4E1Z4	0.85048	0.85048	3.00234e-20	6.84954e-19	176	B4E1Z4	NaN	cDNA FLJ55673, highly similar to Complement factor B (EC 3.4.21.47)	B4E1Z4_HUMAN	1	80.3101	1.8031	Dengue	QC	NaN	NaN	NaN	155.548	0.0855623
Dengue / QC	_DYFPEPVTVSWNSGALTSGVHTFPAVLQSSGLYSLSSVVTVPSSSLGTK_	P01861	1.12926	1.12926	3.52919e-20	7.98954e-19	170	P01861	IGHG4	Immunoglobulin heavy constant gamma 4	IGHG4_HUMAN	1	118.746	2.18746	Dengue	QC	NaN	NaN	NaN	154.559	0.10393
Dengue / QC	_SFEGLGQLEVLTLDHNQLQEVK_	P35858;P35858-2	1.06675	1.06675	3.79956e-20	8.56866e-19	82	P35858;P35858-2	IGFALS	Insulin-like growth factor-binding protein complex acid labile subunit;Isoform 2 of Insulin-like growth factor-binding protein complex acid labile subunit	ALS_HUMAN	1	109.47	2.0947	Dengue	QC	NaN	NaN	NaN	73.3612	0.0776922
Dengue / QC	_EVVTSEDGSDC[Carbamidomethyl (C)]PEAM[Oxidation (M)]DLGTLSGIGTLDGFR_	P02671	1.15444	1.15444	4.18751e-20	9.40751e-19	52	P02671	FGA	Fibrinogen alpha chain	FIBA_HUMAN	1	122.597	2.22597	Dengue	QC	NaN	NaN	NaN	33.6826	0.378127
Dengue / QC	_LVYHLGLPFSFLTFPYVEEAIK_	A0A182DWH7;P49908	1.02393	1.02393	4.28328e-20	9.58608e-19	88	A0A182DWH7;P49908	SELENOP	Selenoprotein P (Fragment);Selenoprotein P	A0A182DWH7_HUMAN;SEPP1_HUMAN	1	103.345	2.03345	Dengue	QC	NaN	NaN	NaN	71.8693	0.0889346
Dengue / QC	_QDGSVDFGRK_	P02675	5.40687	5.40687	5.15873e-20	1.14151e-18	34	P02675	FGB	Fibrinogen beta chain	FIBB_HUMAN	1	4142.59	42.4259	Dengue	QC	NaN	NaN	NaN	29.1883	0.208165
Dengue / QC	_WDPYKQGFGNVATNTDGK_	P02675	2.46944	2.46944	7.26795e-20	1.57857e-18	30	P02675	FGB	Fibrinogen beta chain	FIBB_HUMAN	1	453.827	5.53827	Dengue	QC	NaN	NaN	NaN	25.6413	0.0991257
Dengue / QC	_TVMVNIENPEGIPVKQDSLSSQNQLGVLPLSWDIPELVNM[Oxidation (M)]GQWK_	P01024	0.772096	0.772096	7.74697e-20	1.66418e-18	146	P01024	C3	Complement C3	CO3_HUMAN	1	70.7749	1.70775	Dengue	QC	NaN	NaN	NaN	102.74	0.0760136
Dengue / QC	_EPC[Carbamidomethyl (C)]VESLVSQYFQTVTDYGKDLMEK_	P02652;V9GYM3	0.886043	0.886043	7.77765e-20	1.6647e-18	172	P02652;V9GYM3	APOA2	Apolipoprotein A-II	APOA2_HUMAN;V9GYM3_HUMAN	1	84.8101	1.8481	Dengue	QC	NaN	NaN	NaN	113.934	0.076467
Dengue / QC	_RAPYPNYDRDILTIDIGR_	Q16610	1.14551	1.14551	7.96412e-20	1.69844e-18	96	Q16610	ECM1	Extracellular matrix protein 1	ECM1_HUMAN	1	121.225	2.21225	Dengue	QC	NaN	NaN	NaN	85.5877	0.0977285
Dengue / QC	_LHLETDSLALVALGALDTALYAAGSKSHKPLNMGK_	P0C0L5	1.19055	1.19055	9.61802e-20	2.02909e-18	70	P0C0L5	C4B	Complement C4-B	CO4B_HUMAN	1	128.24	2.2824	Dengue	QC	NaN	NaN	NaN	50.9571	0.183243
Dengue / QC	_QSMTLSSEVQIPDFDVDLGTILR_	P04114	1.30464	1.30464	9.95622e-20	2.09294e-18	136	P04114	APOB	Apolipoprotein B-100	APOB_HUMAN	1	147.023	2.47023	Dengue	QC	NaN	NaN	NaN	65.407	0.118367
Dengue / QC	_REDFDVEAADSAGNC[Carbamidomethyl (C)]LDSLVFVAGDR_	P09871	1.06808	1.06808	1.26887e-19	2.64843e-18	90	P09871	C1S	Complement C1s subcomponent	C1S_HUMAN	1	109.664	2.09664	Dengue	QC	NaN	NaN	NaN	76.5319	0.104582
Dengue / QC	_IDTINLFPATLFDAYMVAQNPGEWMLSC[Carbamidomethyl (C)]QNLNHLK_	P00450	0.876845	0.876845	1.72461e-19	3.51248e-18	102	P00450	CP	Ceruloplasmin	CERU_HUMAN	1	83.6355	1.83635	Dengue	QC	NaN	NaN	NaN	92.0392	0.0929024
Dengue / QC	_HLIVTPSGC[Carbamidomethyl (C)]GEQNMIGMTPTVIAVHYLDETEQWEKFGLEK_	P01024	0.886224	0.886224	1.98862e-19	3.9813e-18	122	P01024	C3	Complement C3	CO3_HUMAN	1	84.8332	1.84833	Dengue	QC	NaN	NaN	NaN	99.6007	0.0993404
Dengue / QC	_C[Carbamidomethyl (C)]AEENC[Carbamidomethyl (C)]FIQKSDDKVTLEER_	P01024	3.36894	3.36894	2.05036e-19	4.09098e-18	38	P01024	C3	Complement C3	CO3_HUMAN	1	933.12	10.3312	Dengue	QC	NaN	NaN	NaN	31.5751	0.168249
Dengue / QC	_VVYRQYTDSTFRVPVER_	P00450	4.56985	4.56985	2.09137e-19	4.15871e-18	30	P00450	CP	Ceruloplasmin	CERU_HUMAN	1	2274.98	23.7498	Dengue	QC	NaN	NaN	NaN	22.2389	0.135403
Dengue / QC	_MYYSAVEPTK_	E9PFZ2	2.04749	2.04749	2.62238e-19	5.16233e-18	54	E9PFZ2	CP	Ceruloplasmin	E9PFZ2_HUMAN	1	313.387	4.13387	Dengue	QC	NaN	NaN	NaN	27.044	0.0974516
Dengue / QC	_ALTDMPQM[Oxidation (M)]R_	P02671	3.46623	3.46623	3.37047e-19	6.52586e-18	34	P02671	FGA	Fibrinogen alpha chain	FIBA_HUMAN	1	1005.19	11.0519	Dengue	QC	NaN	NaN	NaN	28.2275	0.144024
Dengue / QC	_MDWLVPATC[Carbamidomethyl (C)]EPIQSVFFFSGDKYYR_	P04004	1.06338	1.06338	3.67196e-19	7.08628e-18	106	P04004	VTN	Vitronectin	VTNC_HUMAN	1	108.982	2.08982	Dengue	QC	NaN	NaN	NaN	84.6499	0.0931316
Dengue / QC	_WC[Carbamidomethyl (C)]AVSEHEATKC[Carbamidomethyl (C)]QSFRDHMK_	P02787	8.68207	8.68207	4.08328e-19	7.77806e-18	26	P02787	TF	Serotransferrin	TRFE_HUMAN	1	40973.7	410.737	Dengue	QC	NaN	NaN	NaN	20.0151	0.219801
Dengue / QC	_VGPEADKYR_	P02679;P02679-2	4.52303	4.52303	4.81952e-19	9.15086e-18	112	P02679;P02679-2	FGG	Fibrinogen gamma chain;Isoform Gamma-A of Fibrinogen gamma chain	FIBG_HUMAN	1	2199.14	22.9914	Dengue	QC	NaN	NaN	NaN	80.0774	0.36002
Dengue / QC	_VPLLLSEPINIIDALEM[Oxidation (M)]R_	P04114	0.915356	0.915356	9.55686e-19	1.74695e-17	88	P04114	APOB	Apolipoprotein B-100	APOB_HUMAN	1	88.6035	1.88603	Dengue	QC	NaN	NaN	NaN	67.3069	0.095187
Dengue / QC	_FRIEDGFSLKEQLQDMGLVDLFSPEK_	P01008	1.71574	1.71574	1.05334e-18	1.9195e-17	124	P01008	SERPINC1	Antithrombin-III	ANT3_HUMAN	1	228.464	3.28464	Dengue	QC	NaN	NaN	NaN	94.9031	0.151171
Dengue / QC	_GM[Oxidation (M)]TRPLSTLISSSQSC[Carbamidomethyl (C)]QYTLDAK_	P04114	1.40209	1.40209	1.26695e-18	2.27356e-17	44	P04114	APOB	Apolipoprotein B-100	APOB_HUMAN	1	164.284	2.64284	Dengue	QC	NaN	NaN	NaN	29.963	0.0618872
Dengue / QC	_KGGVASGFKHVVPNEVVVQR_	P06396	1.16862	1.16862	1.41973e-18	2.53998e-17	84	P06396	GSN	Gelsolin	GELS_HUMAN	1	124.797	2.24797	Dengue	QC	NaN	NaN	NaN	74.6809	0.100801
Dengue / QC	_IFFPGVSEFGK_	F8WF14;P06276	1.07664	1.07664	1.4308e-18	2.55203e-17	58	F8WF14;P06276	BCHE	Carboxylic ester hydrolase;Cholinesterase	F8WF14_HUMAN;CHLE_HUMAN	1	110.912	2.10912	Dengue	QC	NaN	NaN	NaN	45.4486	0.0945102
Dengue / QC	_SLGNVIMVC[Carbamidomethyl (C)]R_	P08603	0.832841	0.832841	1.50339e-18	2.67339e-17	138	P08603	CFH	Complement factor H	CFAH_HUMAN	1	78.119	1.78119	Dengue	QC	NaN	NaN	NaN	120.341	0.0777799
Dengue / QC	_NPDPVAAPWC[Carbamidomethyl (C)]YTTDPSVR_	P08519	1.24228	1.24228	1.99123e-18	3.5091e-17	42	P08519	LPA	Apolipoprotein(a)	APOA_HUMAN	1	136.573	2.36573	Dengue	QC	NaN	NaN	NaN	35.632	0.11396
Dengue / QC	_SILQM[Oxidation (M)]SLDHHIVTPLTSLVIENEAGDER_	P19823	1.85385	1.85385	2.1709e-18	3.8143e-17	118	P19823	ITIH2	Inter-alpha-trypsin inhibitor heavy chain H2	ITIH2_HUMAN	1	261.464	3.61464	Dengue	QC	NaN	NaN	NaN	109.741	0.149488
Dengue / QC	_WNPSPPAC[Carbamidomethyl (C)]EPNSC[Carbamidomethyl (C)]INLPDIPHASWETYPRPTKEDVYVVGTVLR_	P04003	1.32303	1.32303	2.34171e-18	4.09001e-17	80	P04003	C4BPA	C4b-binding protein alpha chain	C4BPA_HUMAN	1	150.191	2.50191	Dengue	QC	NaN	NaN	NaN	72.2351	0.0889508
Dengue / QC	_SSTSPTTNVLLSPLSVATALSALSLGAEQRTESIIHR_	P36955	1.76654	1.76654	2.74695e-18	4.76949e-17	62	P36955	SERPINF1	Pigment epithelium-derived factor	PEDF_HUMAN	1	240.237	3.40237	Dengue	QC	NaN	NaN	NaN	41.5569	0.172519
Dengue / QC	_SELTQQLNALFQDK_	P06727	0.993992	0.993992	2.7679e-18	4.79172e-17	62	P06727	APOA4	Apolipoprotein A-IV	APOA4_HUMAN	1	99.1688	1.99169	Dengue	QC	NaN	NaN	NaN	57.3925	0.107877
Dengue / QC	_LGREGVQKEDIPPADLSDQVPDTESETR_	P01024	2.73316	2.73316	2.89305e-18	4.97909e-17	94	P01024	C3	Complement C3	CO3_HUMAN	1	564.913	6.64913	Dengue	QC	NaN	NaN	NaN	65.5773	0.226969
Dengue / QC	_A[Acetyl (Protein N-term)]SPDWGYDDKNGPEQWSK_	P00915	2.37829	2.37829	2.91557e-18	5.00322e-17	70	P00915	CA1	Carbonic anhydrase 1	CAH1_HUMAN	1	419.922	5.19922	Dengue	QC	NaN	NaN	NaN	57.7606	0.184496
Dengue / QC	_HYLM[Oxidation (M)]WGLSSDFWGEKPNLSYIIGK_	P01024	1.13984	1.13984	3.04611e-18	5.21203e-17	98	P01024	C3	Complement C3	CO3_HUMAN	1	120.356	2.20356	Dengue	QC	NaN	NaN	NaN	71.2841	0.0995323
Dengue / QC	_VYC[Carbamidomethyl (C)]DM[Oxidation (M)]NTENGGWTVIQNR_	P02675	2.97459	2.97459	3.31047e-18	5.63162e-17	34	P02675	FGB	Fibrinogen beta chain	FIBB_HUMAN	1	686.034	7.86034	Dengue	QC	NaN	NaN	NaN	25.621	0.143042
Dengue / QC	_TVAAC[Carbamidomethyl (C)]NLPIVRGPC[Carbamidomethyl (C)]R_	P02760	3.36291	3.36291	3.89632e-18	6.59015e-17	26	P02760	AMBP	Protein AMBP	AMBP_HUMAN	1	928.815	10.2881	Dengue	QC	NaN	NaN	NaN	18.7375	0.101071
Dengue / QC	_ADDKETC[Carbamidomethyl (C)]FAEEPTMR_	A0A0C4DGB6	1.45378	1.45378	4.42515e-18	7.39956e-17	64	A0A0C4DGB6	ALB	Serum albumin	A0A0C4DGB6_HUMAN	1	173.925	2.73925	Dengue	QC	NaN	NaN	NaN	50.3434	0.100977
Dengue / QC	_VWPQQPSGELFEIEIDTLETTC[Carbamidomethyl (C)]HVLDPTPVAR_	P02765	0.819757	0.819757	4.65047e-18	7.73238e-17	136	P02765	AHSG	Alpha-2-HS-glycoprotein	FETUA_HUMAN	1	76.5108	1.76511	Dengue	QC	NaN	NaN	NaN	118.08	0.0783534
Dengue / QC	_WVQTLSEQVQEELLSSQVTQELR_	P02649	1.22059	1.22059	7.00546e-18	1.14222e-16	62	P02649	APOE	Apolipoprotein E	APOE_HUMAN	1	133.042	2.33042	Dengue	QC	NaN	NaN	NaN	54.6736	0.119576
Dengue / QC	_ILLMDLNEEDPTVLELGITGSK_	P27169	0.815207	0.815207	7.21022e-18	1.17236e-16	176	P27169	PON1	Serum paraoxonase/arylesterase 1	PON1_HUMAN	1	75.9551	1.75955	Dengue	QC	NaN	NaN	NaN	110.374	0.0721179
Dengue / QC	_SPAGPTVVSIGGGK_	P09172	1.6661	1.6661	8.28907e-18	1.33304e-16	50	P09172	DBH	Dopamine beta-hydroxylase	DOPO_HUMAN	1	217.356	3.17356	Dengue	QC	NaN	NaN	NaN	43.9262	0.104596
Dengue / QC	_AVLDVFEEGTEASAATAVKITLLSALVETR_	P01011	1.81081	1.81081	8.73038e-18	1.40019e-16	94	P01011	SERPINA3	Alpha-1-antichymotrypsin	AACT_HUMAN	1	250.839	3.50839	Dengue	QC	NaN	NaN	NaN	88.8097	0.148711
Dengue / QC	_VFKDVFLEMNIPYSVVR_	P01031	0.826288	0.826288	9.93645e-18	1.5807e-16	104	P01031	C5	Complement C5	CO5_HUMAN	1	77.3117	1.77312	Dengue	QC	NaN	NaN	NaN	77.9007	0.0893311
Dengue / QC	_LWAYLTIQELLAKR_	P19827	0.706103	0.706103	1.02139e-17	1.62046e-16	96	P19827	ITIH1	Inter-alpha-trypsin inhibitor heavy chain H1	ITIH1_HUMAN	1	63.1391	1.63139	Dengue	QC	NaN	NaN	NaN	69.4914	0.12413
Dengue / QC	_HDTSLKPISVSYNPATAK_	P00915	1.21707	1.21707	1.19166e-17	1.86545e-16	52	P00915	CA1	Carbonic anhydrase 1	CAH1_HUMAN	1	132.475	2.32475	Dengue	QC	NaN	NaN	NaN	41.6863	0.0791529
Dengue / QC	_APVGHFYEPQAPSAEVEMTSYVLLAYLTAQPAPTSEDLTSATNIVK_	P01023	0.977669	0.977669	1.25189e-17	1.94422e-16	146	P01023	A2M	Alpha-2-macroglobulin	A2MG_HUMAN	1	96.9281	1.96928	Dengue	QC	NaN	NaN	NaN	131.125	0.102483
Dengue / QC	_HADPDFTRKLWAYLTINQLLAER_	P19823	1.93484	1.93484	1.69602e-17	2.61364e-16	74	P19823	ITIH2	Inter-alpha-trypsin inhibitor heavy chain H2	ITIH2_HUMAN	1	282.335	3.82335	Dengue	QC	NaN	NaN	NaN	48.0103	0.229652
Dengue / QC	_NKADYVETVLDSTC[Carbamidomethyl (C)]SSTVQFLEYELNVLGTHK_	P04114	1.27032	1.27032	1.69625e-17	2.61364e-16	70	P04114	APOB	Apolipoprotein B-100	APOB_HUMAN	1	141.215	2.41215	Dengue	QC	NaN	NaN	NaN	60.8802	0.114004
Dengue / QC	_QHLPLIK_	P02671	4.31742	4.31742	1.81525e-17	2.78244e-16	26	P02671	FGA	Fibrinogen alpha chain	FIBA_HUMAN	1	1893.76	19.9376	Dengue	QC	NaN	NaN	NaN	19.724	0.13271
Dengue / QC	_GLQDEDGYRMK_	P0C0L5	4.19741	4.19741	1.86124e-17	2.84552e-16	58	P0C0L5	C4B	Complement C4-B	CO4B_HUMAN	1	1734.62	18.3462	Dengue	QC	NaN	NaN	NaN	36.6742	0.315112
Dengue / QC	_KC[Carbamidomethyl (C)]C[Carbamidomethyl (C)]VEC[Carbamidomethyl (C)]PPC[Carbamidomethyl (C)]PAPPVAGPS[HexNAc]VFLFPPKPK_	P01859	0.592461	0.592461	2.07915e-17	3.16225e-16	172	P01859	IGHG2	Immunoglobulin heavy constant gamma 2	IGHG2_HUMAN	1	50.7817	1.50782	Dengue	QC	NaN	NaN	NaN	163.702	0.150908
Dengue / QC	_EDYLDVYVFGVGPLVNQVNINALASKK_	B4E1Z4	1.47881	1.47881	2.14055e-17	3.23889e-16	66	B4E1Z4	NaN	cDNA FLJ55673, highly similar to Complement factor B (EC 3.4.21.47)	B4E1Z4_HUMAN	1	178.719	2.78719	Dengue	QC	NaN	NaN	NaN	40.6222	0.108434
Dengue / QC	_MYYSAVEPTKDIFTGLIGPMK_	E9PFZ2	1.55104	1.55104	2.22248e-17	3.34566e-16	96	E9PFZ2	CP	Ceruloplasmin	E9PFZ2_HUMAN	1	193.027	2.93027	Dengue	QC	NaN	NaN	NaN	59.9613	0.129582
Dengue / QC	_EPC[Carbamidomethyl (C)]VESLVSQYFQTVTDYGKDLM[Oxidation (M)]EK_	P02652;V9GYM3	0.90434	0.90434	2.66806e-17	3.97575e-16	76	P02652;V9GYM3	APOA2	Apolipoprotein A-II	APOA2_HUMAN;V9GYM3_HUMAN	1	87.1688	1.87169	Dengue	QC	NaN	NaN	NaN	64.4684	0.0776214
Dengue / QC	_GLRQGYFVEAQPK_	P02743	4.43837	4.43837	2.98862e-17	4.43099e-16	34	P02743	APCS	Serum amyloid P-component	SAMP_HUMAN	1	2068.12	21.6812	Dengue	QC	NaN	NaN	NaN	24.1005	0.203744
Dengue / QC	_LTIGEGQQHHLGGAK_	P02679;P02679-2	8.49415	8.49415	3.36671e-17	4.91724e-16	28	P02679;P02679-2	FGG	Fibrinogen gamma chain;Isoform Gamma-A of Fibrinogen gamma chain	FIBG_HUMAN	1	35957.5	360.575	Dengue	QC	NaN	NaN	NaN	21.3082	0.320776
Dengue / QC	_LFLEPTRKDIALLK_	P00747	3.66481	3.66481	3.78666e-17	5.48973e-16	66	P00747	PLG	Plasminogen	PLMN_HUMAN	1	1168.29	12.6829	Dengue	QC	NaN	NaN	NaN	44.8946	0.226652
Dengue / QC	_TPENYPNDGLTMNYC[Carbamidomethyl (C)]R_	P08519	2.58861	2.58861	3.80677e-17	5.50531e-16	36	P08519	LPA	Apolipoprotein(a)	APOA_HUMAN	1	501.519	6.01519	Dengue	QC	NaN	NaN	NaN	27.9759	0.15412
Dengue / QC	_EYGVVLAPDGSTVAVEPLLAGLEAGLQGR_	Q96PD5	0.781286	0.781286	3.97783e-17	5.7386e-16	172	Q96PD5	PGLYRP2	N-acetylmuramoyl-L-alanine amidase	PGRP2_HUMAN	1	71.8663	1.71866	Dengue	QC	NaN	NaN	NaN	109.874	0.0715044
Dengue / QC	_FGSSLITVR_	P80108	0.56394	0.56394	4.07782e-17	5.86846e-16	164	P80108	GPLD1	Phosphatidylinositol-glycan-specific phospholipase D	PHLD_HUMAN	1	47.8301	1.4783	Dengue	QC	NaN	NaN	NaN	113.933	0.0567459
Dengue / QC	_VGFYESDVMGRGHAR_	P01023	4.66087	4.66087	4.16431e-17	5.96378e-16	24	P01023	A2M	Alpha-2-macroglobulin	A2MG_HUMAN	1	2429.66	25.2966	Dengue	QC	NaN	NaN	NaN	17.8131	0.124909
Dengue / QC	_ALTDM[Oxidation (M)]PQMR_	P02671	3.04482	3.04482	4.55205e-17	6.50324e-16	38	P02671	FGA	Fibrinogen alpha chain	FIBA_HUMAN	1	725.246	8.25246	Dengue	QC	NaN	NaN	NaN	30.4009	0.167265
Dengue / QC	_AVHEAASPSQTVQR_	A0A286YES5;P01854	1.89301	1.89301	5.29128e-17	7.45083e-16	22	A0A286YES5;P01854	IGHE	Immunoglobulin heavy constant epsilon (Fragment);Immunoglobulin heavy constant epsilon	A0A286YES5_HUMAN;IGHE_HUMAN	1	271.41	3.7141	Dengue	QC	NaN	NaN	NaN	14.8411	0.189916
Dengue / QC	_LTVSIEAR_	P22792	0.589616	0.589616	5.64516e-17	7.91128e-16	156	P22792	CPN2	Carboxypeptidase N subunit 2	CPN2_HUMAN	1	50.4847	1.50485	Dengue	QC	NaN	NaN	NaN	135.34	0.0662274
Dengue / QC	_DC[Carbamidomethyl (C)]SLPYATESKEC[Carbamidomethyl (C)]R_	P23142	2.97409	2.97409	5.80963e-17	8.12244e-16	82	P23142	FBLN1	Fibulin-1	FBLN1_HUMAN	1	685.763	7.85763	Dengue	QC	NaN	NaN	NaN	61.3752	0.238408
Dengue / QC	_VQLSNDFDEYIM[Oxidation (M)]AIEQTIKSGSDEVQVGQQR_	P01024	1.49003	1.49003	7.42431e-17	1.02341e-15	34	P01024	C3	Complement C3	CO3_HUMAN	1	180.894	2.80894	Dengue	QC	NaN	NaN	NaN	23.2969	0.393725
Dengue / QC	_EC[Carbamidomethyl (C)]EEIIRK_	P02675	8.71658	8.71658	7.91343e-17	1.0782e-15	22	P02675	FGB	Fibrinogen beta chain	FIBB_HUMAN	1	41968	420.68	Dengue	QC	NaN	NaN	NaN	15.9609	0.274951
Dengue / QC	_PGQAPVLVIYGK_	P01714	1.47426	1.47426	8.79919e-17	1.19336e-15	32	P01714	IGLV3-19	Immunoglobulin lambda variable 3-19	LV319_HUMAN	1	177.841	2.77841	Dengue	QC	NaN	NaN	NaN	25.5015	0.239872
Dengue / QC	_IQQIPNVR_	Q6UX71	0.816423	0.816423	9.0817e-17	1.22885e-15	30	Q6UX71	PLXDC2	Plexin domain-containing protein 2	PXDC2_HUMAN	1	76.1034	1.76103	Dengue	QC	NaN	NaN	NaN	14.236	0.154548
Dengue / QC	_ATNYNAGDR_	P61626	1.25669	1.25669	9.50484e-17	1.28022e-15	112	P61626	LYZ	Lysozyme C	LYSC_HUMAN	1	138.946	2.38946	Dengue	QC	NaN	NaN	NaN	102.087	0.134671
Dengue / QC	_AAPSVTLFPPSSEELQANKATLVC[Carbamidomethyl (C)]LISDFYPGAVTVAWKADSSPVK_	P0DOY2	2.06242	2.06242	1.02323e-16	1.3688e-15	90	P0DOY2	IGLC2	Immunoglobulin lambda constant 2	IGLC2_HUMAN	1	317.686	4.17686	Dengue	QC	NaN	NaN	NaN	73.2744	0.184052
Dengue / QC	_TC[Carbamidomethyl (C)]QAWSSM[Oxidation (M)]TPHSHSR_	P08519	3.40903	3.40903	1.03333e-16	1.37918e-15	46	P08519	LPA	Apolipoprotein(a)	APOA_HUMAN	1	962.233	10.6223	Dengue	QC	NaN	NaN	NaN	39.4846	0.267328
Dengue / QC	_TLQGIPQMIGEVIR_	P04114	1.38456	1.38456	1.13207e-16	1.49962e-15	74	P04114	APOB	Apolipoprotein B-100	APOB_HUMAN	1	161.092	2.61092	Dengue	QC	NaN	NaN	NaN	58.8984	0.129218
Dengue / QC	_HQSAC[Carbamidomethyl (C)]KDSDWPFC[Carbamidomethyl (C)]SDEDWNYK_	P02671	2.54863	2.54863	1.13376e-16	1.49962e-15	50	P02671	FGA	Fibrinogen alpha chain	FIBA_HUMAN	1	485.077	5.85077	Dengue	QC	NaN	NaN	NaN	43.2934	0.192682
Dengue / QC	_LRLEPGKEYLIMGLDGATYDLEGHPQYLLDSNSWIEEMPSER_	P0C0L5	1.11955	1.11955	1.15106e-16	1.51569e-15	160	P0C0L5	C4B	Complement C4-B	CO4B_HUMAN	1	117.279	2.17279	Dengue	QC	NaN	NaN	NaN	112.685	0.131279
Dengue / QC	_AVHKAVLTIDEK_	P01009	3.23184	3.23184	1.15557e-16	1.51823e-15	48	P01009	SERPINA1	Alpha-1-antitrypsin	A1AT_HUMAN	1	839.467	9.39467	Dengue	QC	NaN	NaN	NaN	39.9418	0.223123
Dengue / QC	_HLIVTPSGC[Carbamidomethyl (C)]GEQNMIGM[Oxidation (M)]TPTVIAVHYLDETEQWEK_	P01024	1.0119	1.0119	1.17709e-16	1.54306e-15	34	P01024	C3	Complement C3	CO3_HUMAN	1	101.656	2.01656	Dengue	QC	NaN	NaN	NaN	21.9933	0.0832637
Dengue / QC	_ATLDVDEAGTEAAAATSFAIK_	P29622	0.660792	0.660792	1.18864e-16	1.55475e-15	128	P29622	SERPINA4	Kallistatin	KAIN_HUMAN	1	58.095	1.58095	Dengue	QC	NaN	NaN	NaN	92.7619	0.0768466
Dengue / QC	_EYVLPSFEVIVEPTEKFYYIYNEK_	P01024	1.09192	1.09192	1.55527e-16	1.99876e-15	150	P01024	C3	Complement C3	CO3_HUMAN	1	113.157	2.13157	Dengue	QC	NaN	NaN	NaN	100.017	0.106593
Dengue / QC	_VHVSEEGTEPEAMLQVLGPKPALPAGTEDTAK_	P06396	0.94419	0.94419	1.5765e-16	2.02162e-15	54	P06396	GSN	Gelsolin	GELS_HUMAN	1	92.4109	1.92411	Dengue	QC	NaN	NaN	NaN	49.2578	0.0842139
Dengue / QC	_LLNNWDVC[Carbamidomethyl (C)]ADMVGTFTDTEDPAKFK_	P02753;Q5VY30	0.868285	0.868285	1.93215e-16	2.45099e-15	132	P02753;Q5VY30	RBP4	Retinol-binding protein 4;Retinol binding protein 4, plasma, isoform CRA_b	RET4_HUMAN;Q5VY30_HUMAN	1	82.5491	1.82549	Dengue	QC	NaN	NaN	NaN	114.309	0.0930289
Dengue / QC	_YRGDQDATMSILDISMMTGFAPDTDDLKQLANGVDR_	P01024	0.840669	0.840669	2.0202e-16	2.55719e-15	132	P01024	C3	Complement C3	CO3_HUMAN	1	79.088	1.79088	Dengue	QC	NaN	NaN	NaN	107.213	0.093774
Dengue / QC	_DTWVEHWPEEDEC[Carbamidomethyl (C)]QDEENQKQC[Carbamidomethyl (C)]QDLGAFTESMVVFGC[Carbamidomethyl (C)]PN_	P01024	1.23794	1.23794	2.67036e-16	3.3442e-15	138	P01024	C3	Complement C3	CO3_HUMAN	1	135.861	2.35861	Dengue	QC	NaN	NaN	NaN	45.2594	0.108993
Dengue / QC	_ELISLVEDVSSNYDGC[Carbamidomethyl (C)]C[Carbamidomethyl (C)]EGDVVQC[Carbamidomethyl (C)]IR_	P43652	1.11708	1.11708	2.9312e-16	3.63988e-15	72	P43652	AFM	Afamin	AFAM_HUMAN	1	116.907	2.16907	Dengue	QC	NaN	NaN	NaN	62.616	0.10556
Dengue / QC	_SPLFMGKVVNPTQK_	P01009	2.84188	2.84188	3.03493e-16	3.73716e-15	56	P01009	SERPINA1	Alpha-1-antitrypsin	A1AT_HUMAN	1	616.954	7.16954	Dengue	QC	NaN	NaN	NaN	45.9748	0.200177
Dengue / QC	_KWDPYKQGFGNVATNTDGK_	P02675	3.10856	3.10856	3.72715e-16	4.57042e-15	62	P02675	FGB	Fibrinogen beta chain	FIBB_HUMAN	1	762.518	8.62518	Dengue	QC	NaN	NaN	NaN	47.7758	0.231976
Dengue / QC	_LSLEIEQLELQRDSAR_	P04003	1.97239	1.97239	3.84572e-16	4.70601e-15	44	P04003	C4BPA	C4b-binding protein alpha chain	C4BPA_HUMAN	1	292.419	3.92419	Dengue	QC	NaN	NaN	NaN	34.7295	0.12303
Dengue / QC	_QLEQVIAK_	P02671	3.51981	3.51981	4.87601e-16	5.91423e-15	74	P02671	FGA	Fibrinogen alpha chain	FIBA_HUMAN	1	1047.01	11.4701	Dengue	QC	NaN	NaN	NaN	56.9642	0.278446
Dengue / QC	_GGSTSYGTGSETESPRNPSSAGSWNSGSSGPGSTGNR_	P02671	3.13669	3.13669	5.25835e-16	6.3036e-15	78	P02671	FGA	Fibrinogen alpha chain	FIBA_HUMAN	1	779.506	8.79506	Dengue	QC	NaN	NaN	NaN	61.0518	0.258501
Dengue / QC	_DDWFMLGLR_	I3L145;P04278	0.74866	0.74866	5.33872e-16	6.37398e-15	54	I3L145;P04278	SHBG	Sex hormone-binding globulin	I3L145_HUMAN;SHBG_HUMAN	1	68.0231	1.68023	Dengue	QC	NaN	NaN	NaN	29.4645	0.233802
Dengue / QC	_SLEYLDLSFNQIAR_	P51884	1.01319	1.01319	5.54086e-16	6.60192e-15	124	P51884	LUM	Lumican	LUM_HUMAN	1	101.837	2.01837	Dengue	QC	NaN	NaN	NaN	98.0239	0.133271
Dengue / QC	_KMTVTDQVNC[Carbamidomethyl (C)]PKLS_	P05090	2.96752	2.96752	5.81026e-16	6.90893e-15	28	P05090	APOD	Apolipoprotein D	APOD_HUMAN	1	682.191	7.82191	Dengue	QC	NaN	NaN	NaN	20.722	0.1329
Dengue / QC	_TPENYPNAGLTENYC[Carbamidomethyl (C)]R_	P08519	2.13771	2.13771	5.84243e-16	6.93317e-15	44	P08519	LPA	Apolipoprotein(a)	APOA_HUMAN	1	340.063	4.40063	Dengue	QC	NaN	NaN	NaN	29.4756	0.160872
Dengue / QC	_ASTKGPSVFPLAPSSK_	P01857	1.75232	1.75232	7.64272e-16	8.96117e-15	70	P01857	IGHG1	Immunoglobulin heavy constant gamma 1	IGHG1_HUMAN	1	236.901	3.36901	Dengue	QC	NaN	NaN	NaN	54.7137	0.14932
Dengue / QC	_LFLGALPGEDSSTSFC[Carbamidomethyl (C)]LNGLWAQGQR_	I3L145;P04278	1.52826	1.52826	1.04854e-15	1.19145e-14	80	I3L145;P04278	SHBG	Sex hormone-binding globulin	I3L145_HUMAN;SHBG_HUMAN	1	188.438	2.88438	Dengue	QC	NaN	NaN	NaN	72.3075	0.148564
Dengue / QC	_EVDLKDYEDQQK_	P02671	3.05201	3.05201	1.25336e-15	1.40787e-14	82	P02671	FGA	Fibrinogen alpha chain	FIBA_HUMAN	1	729.368	8.29368	Dengue	QC	NaN	NaN	NaN	67.064	0.265776
Dengue / QC	_NIPTVNENLENYYLEVNQLEK_	P51884	0.815082	0.815082	1.31076e-15	1.46675e-14	116	P51884	LUM	Lumican	LUM_HUMAN	1	75.9398	1.7594	Dengue	QC	NaN	NaN	NaN	107.231	0.0989987
Dengue / QC	_QC[Carbamidomethyl (C)]SKEDGGGWWYNR_	P02675	2.94086	2.94086	1.40891e-15	1.57359e-14	64	P02675	FGB	Fibrinogen beta chain	FIBB_HUMAN	1	667.867	7.67867	Dengue	QC	NaN	NaN	NaN	53.3825	0.239474
Dengue / QC	_GFLLLASLR_	P07996	1.46457	1.46457	1.56285e-15	1.72307e-14	72	P07996	THBS1	Thrombospondin-1	TSP1_HUMAN	1	175.982	2.75982	Dengue	QC	NaN	NaN	NaN	43.7281	0.162775
Dengue / QC	_KEGGLGPLNIPLLADVTR_	P32119	0.990838	0.990838	1.56323e-15	1.72307e-14	62	P32119	PRDX2	Peroxiredoxin-2	PRDX2_HUMAN	1	98.7339	1.98734	Dengue	QC	NaN	NaN	NaN	48.5179	0.0856548
Dengue / QC	_V[Acetyl (Protein N-term)]LSPADKTNVK_	P69905	1.52512	1.52512	1.59947e-15	1.75971e-14	134	P69905	HBA1	Hemoglobin subunit alpha	HBA_HUMAN	1	187.81	2.8781	Dengue	QC	NaN	NaN	NaN	101.179	0.137844
Dengue / QC	_VVAGVANALAHKYH_	P68871	0.974136	0.974136	1.63605e-15	1.79661e-14	54	P68871	HBB	Hemoglobin subunit beta	HBB_HUMAN	1	96.4465	1.96446	Dengue	QC	NaN	NaN	NaN	44.0251	0.0796697
Dengue / QC	_VPAPPSPQPATYTC[Carbamidomethyl (C)]VVSHEDSR_	A0A0A0MS09;P01880;P01880-2	1.37889	1.37889	1.63999e-15	1.79758e-14	68	A0A0A0MS09;P01880;P01880-2	IGHD	Immunoglobulin heavy constant delta (Fragment);Immunoglobulin heavy constant delta;Isoform 2 of Immunoglobulin heavy constant delta	A0A0A0MS09_HUMAN;IGHD_HUMAN;IGHD_HUMAN	1	160.068	2.60068	Dengue	QC	NaN	NaN	NaN	53.0425	0.12067
Dengue / QC	_TPENYPNAGLTMNYC[Carbamidomethyl (C)]RNPDADKGPWC[Carbamidomethyl (C)]FTTDPSVR_	P00747	1.81468	1.81468	1.86576e-15	2.02618e-14	66	P00747	PLG	Plasminogen	PLMN_HUMAN	1	251.781	3.51781	Dengue	QC	NaN	NaN	NaN	57.015	0.173096
Dengue / QC	_C[Carbamidomethyl (C)]TLKPC[Carbamidomethyl (C)]DYPDIKHGGLYHENMR_	P08603	3.40757	3.40757	1.87392e-15	2.03129e-14	32	P08603	CFH	Complement factor H	CFAH_HUMAN	1	961.163	10.6116	Dengue	QC	NaN	NaN	NaN	27.3241	0.201751
Dengue / QC	_NPDAEIRPWC[Carbamidomethyl (C)]YTMDPSVR_	P08519	1.01178	1.01178	2.17295e-15	2.33821e-14	70	P08519	LPA	Apolipoprotein(a)	APOA_HUMAN	1	101.64	2.0164	Dengue	QC	NaN	NaN	NaN	64.6457	0.0884932
Dengue / QC	_LYSVSYLLK_	P21333;P21333-2;Q5HY54	1.0418	1.0418	2.24104e-15	2.38964e-14	68	P21333;P21333-2;Q5HY54	FLNA	Filamin-A;Isoform 2 of Filamin-A;Filamin-A	FLNA_HUMAN;FLNA_HUMAN;Q5HY54_HUMAN	1	105.879	2.05879	Dengue	QC	NaN	NaN	NaN	62.3679	0.109015
Dengue / QC	_QTVNLQLQPYSLVTTLNSDLK_	P04114	1.16016	1.16016	2.24096e-15	2.38964e-14	120	P04114	APOB	Apolipoprotein B-100	APOB_HUMAN	1	123.482	2.23482	Dengue	QC	NaN	NaN	NaN	91.1865	0.0929644
Dengue / QC	_STAAMSTYTGIFTDQVLSVLKGEE_	A0A024R0T9;K7ER74;P02655	0.736001	0.736001	2.35105e-15	2.49789e-14	142	A0A024R0T9;K7ER74;P02655	APOC4-APOC2;APOC4-APOC2;APOC2	Apolipoprotein C-II isoform 1;APOC4-APOC2 readthrough (NMD candidate);Apolipoprotein C-II	A0A024R0T9_HUMAN;K7ER74_HUMAN;APOC2_HUMAN	1	66.5553	1.66555	Dengue	QC	NaN	NaN	NaN	107.184	0.0716083
Dengue / QC	_TGC[Carbamidomethyl (C)]SLMGASVDSTLAFNTYVHFQGK_	P01019	-0.0720277	0.0720277	2.55018e-15	2.69971e-14	34	P01019	AGT	Angiotensinogen	ANGT_HUMAN	1	-4.87	0.9513	Dengue	QC	NaN	NaN	NaN	27.8501	0.245793
Dengue / QC	_NPDGDVGGPWC[Carbamidomethyl (C)]YTTNPRK_	P00747	1.72713	1.72713	2.60534e-15	2.75314e-14	44	P00747	PLG	Plasminogen	PLMN_HUMAN	1	231.068	3.31068	Dengue	QC	NaN	NaN	NaN	37.0683	0.176799
Dengue / QC	_SLDFTELDVAAEKIDRFMQAVTGWK_	P01019	1.73265	1.73265	2.63051e-15	2.77477e-14	78	P01019	AGT	Angiotensinogen	ANGT_HUMAN	1	232.337	3.32337	Dengue	QC	NaN	NaN	NaN	71.16	0.152368
Dengue / QC	_DLLPSRDR_	P02671	3.64487	3.64487	3.11925e-15	3.24954e-14	74	P02671	FGA	Fibrinogen alpha chain	FIBA_HUMAN	1	1150.88	12.5088	Dengue	QC	NaN	NaN	NaN	50.8996	0.295507
Dengue / QC	_SVAVYGQYGGQPC[Carbamidomethyl (C)]VGNAFETQSC[Carbamidomethyl (C)]EPTRGC[Carbamidomethyl (C)]PTEEGC[Carbamidomethyl (C)]GER_	P10643	2.09328	2.09328	3.15515e-15	3.27535e-14	60	P10643	C7	Complement component C7	CO7_HUMAN	1	326.716	4.26716	Dengue	QC	NaN	NaN	NaN	49.0384	0.172314
Dengue / QC	_NSLFFSAQPFEITASTNNEGNLK_	P04114	0.834062	0.834062	3.57766e-15	3.68793e-14	92	P04114	APOB	Apolipoprotein B-100	APOB_HUMAN	1	78.2698	1.7827	Dengue	QC	NaN	NaN	NaN	64.3099	0.104212
Dengue / QC	_TLMFGSYLDDEKNWGLSFYADKPETTK_	P19652	0.638066	0.638066	3.63046e-15	3.73582e-14	162	P19652	ORM2	Alpha-1-acid glycoprotein 2	A1AG2_HUMAN	1	55.6241	1.55624	Dengue	QC	NaN	NaN	NaN	148.231	0.0754577
Dengue / QC	_TFVLNFIK_	E7END6;P04070;P04070-2	0.701984	0.701984	3.68874e-15	3.78916e-14	32	E7END6;P04070;P04070-2	PROC	Vitamin K-dependent protein C;Vitamin K-dependent protein C;Isoform 2 of Vitamin K-dependent protein C	E7END6_HUMAN;PROC_HUMAN;PROC_HUMAN	1	62.6741	1.62674	Dengue	QC	NaN	NaN	NaN	25.7518	0.112253
Dengue / QC	_VYC[Carbamidomethyl (C)]DMNTENGGWTVIQNR_	P02675	3.58831	3.58831	3.89306e-15	3.98514e-14	110	P02675	FGB	Fibrinogen beta chain	FIBB_HUMAN	1	1102.79	12.0279	Dengue	QC	NaN	NaN	NaN	74.4075	0.34809
Dengue / QC	_GWSPTPR_	Q02985;Q02985-2	1.65543	1.65543	4.00647e-15	4.08701e-14	50	Q02985;Q02985-2	CFHR3	Complement factor H-related protein 3;Isoform 2 of Complement factor H-related protein 3	FHR3_HUMAN	1	215.017	3.15017	Dengue	QC	NaN	NaN	NaN	45.1005	0.141772
Dengue / QC	_SLKVVPEGIR_	P01024	2.25787	2.25787	4.03858e-15	4.11264e-14	76	P01024	C3	Complement C3	CO3_HUMAN	1	378.285	4.78285	Dengue	QC	NaN	NaN	NaN	50.0527	0.214931
Dengue / QC	_MSSINADFAFNLYR_	P05543	1.51045	1.51045	4.09156e-15	4.1594e-14	48	P05543	SERPINA7	Thyroxine-binding globulin	THBG_HUMAN	1	184.899	2.84899	Dengue	QC	NaN	NaN	NaN	40.8176	0.137581
Dengue / QC	_LVSANRLFGDK_	P01008	3.21058	3.21058	4.25923e-15	4.30753e-14	30	P01008	SERPINC1	Antithrombin-III	ANT3_HUMAN	1	825.722	9.25722	Dengue	QC	NaN	NaN	NaN	25.5242	0.1862
Dengue / QC	_AKGQPREPQVYTLPPSQEEMTK_	P01861	1.16561	1.16561	4.34031e-15	4.3745e-14	162	P01861	IGHG4	Immunoglobulin heavy constant gamma 4	IGHG4_HUMAN	1	124.329	2.24329	Dengue	QC	NaN	NaN	NaN	143.707	0.115326
Dengue / QC	_TAVNALWGK_	P02042	0.495174	0.495174	4.66758e-15	4.68829e-14	104	P02042	HBD	Hemoglobin subunit delta	HBD_HUMAN	1	40.9491	1.40949	Dengue	QC	NaN	NaN	NaN	89.5091	0.0539901
Dengue / QC	_HQDGSYSTFGER_	P20742	1.53241	1.53241	4.68376e-15	4.69653e-14	60	P20742	PZP	Pregnancy zone protein	PZP_HUMAN	1	189.268	2.89268	Dengue	QC	NaN	NaN	NaN	40.9199	0.13008
Dengue / QC	_EGGQTAPASTR_	P06396	1.05741	1.05741	4.86053e-15	4.85723e-14	118	P06396	GSN	Gelsolin	GELS_HUMAN	1	108.12	2.0812	Dengue	QC	NaN	NaN	NaN	110.854	0.116114
Dengue / QC	_QLEQVIAKDLLPSRDR_	P02671	5.06468	5.06468	5.15182e-15	5.13959e-14	24	P02671	FGA	Fibrinogen alpha chain	FIBA_HUMAN	1	3246.73	33.4673	Dengue	QC	NaN	NaN	NaN	17.8961	0.173687
Dengue / QC	_LTVDKSRWQEGNVFSC[Carbamidomethyl (C)]SVMHEALHNHYTQK_	P01861	1.02657	1.02657	5.35366e-15	5.32291e-14	140	P01861	IGHG4	Immunoglobulin heavy constant gamma 4	IGHG4_HUMAN	1	103.717	2.03717	Dengue	QC	NaN	NaN	NaN	79.0376	0.492412
Dengue / QC	_TLMNLGGLAVAR_	P37802;X6RJP6	1.27868	1.27868	5.36667e-15	5.32685e-14	46	P37802;X6RJP6	TAGLN2	Transgelin-2;Transgelin-2 (Fragment)	TAGL2_HUMAN;X6RJP6_HUMAN	1	142.616	2.42616	Dengue	QC	NaN	NaN	NaN	33.5968	0.119261
Dengue / QC	_QGFGNVATNTDGK_	P02675	2.56052	2.56052	5.67852e-15	5.60089e-14	112	P02675	FGB	Fibrinogen beta chain	FIBB_HUMAN	1	489.92	5.8992	Dengue	QC	NaN	NaN	NaN	78.6846	0.263407
Dengue / QC	_ETYDFDIAVLR_	P00742	0.826357	0.826357	5.68082e-15	5.60089e-14	132	P00742	F10	Coagulation factor X	FA10_HUMAN	1	77.3202	1.7732	Dengue	QC	NaN	NaN	NaN	77.9294	0.089748
Dengue / QC	_NIFISPVSISMALAMLSLGTC[Carbamidomethyl (C)]GHTR_	P08185	0.785201	0.785201	5.8298e-15	5.73817e-14	134	P08185	SERPINA6	Corticosteroid-binding globulin	CBG_HUMAN	1	72.3332	1.72333	Dengue	QC	NaN	NaN	NaN	125.083	0.0914845
Dengue / QC	_VAQLEAQC[Carbamidomethyl (C)]QEPC[Carbamidomethyl (C)]KDTVQIHDITGK_	P02679;P02679-2	2.67447	2.67447	6.0007e-15	5.88669e-14	94	P02679;P02679-2	FGG	Fibrinogen gamma chain;Isoform Gamma-A of Fibrinogen gamma chain	FIBG_HUMAN	1	538.405	6.38405	Dengue	QC	NaN	NaN	NaN	71.458	0.256836
Dengue / QC	_HVSSPLASYFLSFPYAR_	P80108	1.16859	1.16859	6.34977e-15	6.19813e-14	86	P80108	GPLD1	Phosphatidylinositol-glycan-specific phospholipase D	PHLD_HUMAN	1	124.792	2.24792	Dengue	QC	NaN	NaN	NaN	41.2906	0.108487
Dengue / QC	_C[Carbamidomethyl (C)]QKRPC[Carbamidomethyl (C)]GHPGDTPFGTFTLTGGNVFEYGVK_	P08603	3.23809	3.23809	6.60963e-15	6.41985e-14	40	P08603	CFH	Complement factor H	CFAH_HUMAN	1	843.546	9.43546	Dengue	QC	NaN	NaN	NaN	33.804	0.241786
Dengue / QC	_TEC[Carbamidomethyl (C)]FITGWGETQGTFGAGLLK_	P00747	0.590568	0.590568	7.33578e-15	7.09005e-14	102	P00747	PLG	Plasminogen	PLMN_HUMAN	1	50.584	1.50584	Dengue	QC	NaN	NaN	NaN	90.9218	0.0746434
Dengue / QC	_WSPELPVC[Carbamidomethyl (C)]APIIC[Carbamidomethyl (C)]PPPSIPTFATLR_	P02749	0.664105	0.664105	7.40976e-15	7.14981e-14	170	P02749	APOH	Beta-2-glycoprotein 1	APOH_HUMAN	1	58.4585	1.58459	Dengue	QC	NaN	NaN	NaN	138.882	0.0817967
Dengue / QC	_KGGETSEM[Oxidation (M)]YLIQPDSSVKPYR_	P02675	2.35641	2.35641	7.89368e-15	7.57948e-14	42	P02675	FGB	Fibrinogen beta chain	FIBB_HUMAN	1	412.093	5.12093	Dengue	QC	NaN	NaN	NaN	34.1204	0.176164
Dengue / QC	_QSNNKYAASSYLSLTPEQWR_	P15814	2.23908	2.23908	8.23777e-15	7.89699e-14	68	P15814	IGLL1	Immunoglobulin lambda-like polypeptide 1	IGLL1_HUMAN	1	372.096	4.72096	Dengue	QC	NaN	NaN	NaN	55.2879	0.187848
Dengue / QC	_GSSTWLTAFVLKVLSLAQEQVGGSPEK_	P0C0L5	0.912133	0.912133	8.44297e-15	8.08054e-14	90	P0C0L5	C4B	Complement C4-B	CO4B_HUMAN	1	88.1825	1.88183	Dengue	QC	NaN	NaN	NaN	36.0967	0.11244
Dengue / QC	_VSFLSALEEYTK_	P02647	1.09585	1.09585	9.19728e-15	8.75974e-14	44	P02647	APOA1	Apolipoprotein A-I	APOA1_HUMAN	1	113.738	2.13738	Dengue	QC	NaN	NaN	NaN	15.6721	0.041888
Dengue / QC	_SM[Oxidation (M)]GGKEDLIWELLNQAQEHFGK_	P02787	1.14102	1.14102	9.82853e-15	9.33076e-14	140	P02787	TF	Serotransferrin	TRFE_HUMAN	1	120.537	2.20537	Dengue	QC	NaN	NaN	NaN	129.889	0.121168
Dengue / QC	_QSGLYFIKPLK_	P02679;P02679-2	3.0217	3.0217	1.03932e-14	9.85091e-14	80	P02679;P02679-2	FGG	Fibrinogen gamma chain;Isoform Gamma-A of Fibrinogen gamma chain	FIBG_HUMAN	1	712.123	8.12123	Dengue	QC	NaN	NaN	NaN	59.9505	0.277436
Dengue / QC	_AQYVLISPEASSR_	P80108	0.373711	0.373711	1.13196e-14	1.06433e-13	166	P80108	GPLD1	Phosphatidylinositol-glycan-specific phospholipase D	PHLD_HUMAN	1	29.5682	1.29568	Dengue	QC	NaN	NaN	NaN	144.557	0.0544941
Dengue / QC	_FYYLIASETPGK_	P29622	0.356286	0.356286	1.43142e-14	1.33735e-13	60	P29622	SERPINA4	Kallistatin	KAIN_HUMAN	1	28.0126	1.28013	Dengue	QC	NaN	NaN	NaN	40.8268	0.0752941
Dengue / QC	_LGNQEPGGQTALKSPPGVC[Carbamidomethyl (C)]SRDPTPEQTHR_	P08697	1.68121	1.68121	1.4398e-14	1.34093e-13	72	P08697	SERPINF2	Alpha-2-antiplasmin	A2AP_HUMAN	1	220.696	3.20696	Dengue	QC	NaN	NaN	NaN	58.7972	0.168668
Dengue / QC	_NPSSAGSWNSGSSGPGSTGNR_	P02671	1.97446	1.97446	1.45872e-14	1.35426e-13	64	P02671	FGA	Fibrinogen alpha chain	FIBA_HUMAN	1	292.98	3.9298	Dengue	QC	NaN	NaN	NaN	58.8518	0.195333
Dengue / QC	_YLGEEYVKAVGNLRK_	P02787	2.23962	2.23962	1.51632e-14	1.40331e-13	122	P02787	TF	Serotransferrin	TRFE_HUMAN	1	372.273	4.72273	Dengue	QC	NaN	NaN	NaN	89.5377	0.234345
Dengue / QC	_ESDWLGQSM[Oxidation (M)]FTC[Carbamidomethyl (C)]R_	P01871	1.30252	1.30252	1.66392e-14	1.52552e-13	52	P01871	IGHM	Immunoglobulin heavy constant mu	IGHM_HUMAN	1	146.659	2.46659	Dengue	QC	NaN	NaN	NaN	34.5676	0.130602
Dengue / QC	_NLC[Carbamidomethyl (C)]EAMENFMQQLK_	P20851;P20851-2	1.43209	1.43209	1.7198e-14	1.56808e-13	38	P20851;P20851-2	C4BPB	C4b-binding protein beta chain;Isoform 2 of C4b-binding protein beta chain	C4BPB_HUMAN	1	169.837	2.69837	Dengue	QC	NaN	NaN	NaN	16.2037	0.159053
Dengue / QC	_WQQGNIFSC[Carbamidomethyl (C)]SVMHEALHNRFTQK_	P01860	1.47205	1.47205	1.76754e-14	1.608e-13	86	P01860	IGHG3	Immunoglobulin heavy constant gamma 3	IGHG3_HUMAN	1	177.415	2.77415	Dengue	QC	NaN	NaN	NaN	66.824	0.149155
Dengue / QC	_AHYGGFTVQNEANKYQISVNKYR_	P02675	2.50234	2.50234	1.84973e-14	1.67758e-13	42	P02675	FGB	Fibrinogen beta chain	FIBB_HUMAN	1	466.602	5.66602	Dengue	QC	NaN	NaN	NaN	35.4593	0.195596
Dengue / QC	_DSSTWLTAFVLKVLSLAQEQVGGSPEK_	A0A140TA49	1.59611	1.59611	2.40709e-14	2.14344e-13	66	A0A140TA49	C4A	Complement C4-A	A0A140TA49_HUMAN	1	202.327	3.02327	Dengue	QC	NaN	NaN	NaN	51.7763	0.164269
Dengue / QC	_VQLSNDFDEYIMAIEQTIKSGSDEVQVGQQR_	P01024	3.84158	3.84158	2.46285e-14	2.18978e-13	66	P01024	C3	Complement C3	CO3_HUMAN	1	1333.6	14.336	Dengue	QC	NaN	NaN	NaN	37.1321	0.336477
Dengue / QC	_VINLPLDSMAAPWETGDTFPDVVAIAPDVR_	Q96PD5	0.830536	0.830536	2.48574e-14	2.2068e-13	136	Q96PD5	PGLYRP2	N-acetylmuramoyl-L-alanine amidase	PGRP2_HUMAN	1	77.8346	1.77835	Dengue	QC	NaN	NaN	NaN	119.423	0.0858468
Dengue / QC	_AC[Carbamidomethyl (C)]EPGVDYVYKTR_	P01024	3.25391	3.25391	2.529e-14	2.24182e-13	34	P01024	C3	Complement C3	CO3_HUMAN	1	853.949	9.53949	Dengue	QC	NaN	NaN	NaN	27.0607	0.169083
Dengue / QC	_KLVPFATELHER_	P06727	0.838465	0.838465	2.64159e-14	2.33811e-13	114	P06727	APOA4	Apolipoprotein A-IV	APOA4_HUMAN	1	78.8147	1.78815	Dengue	QC	NaN	NaN	NaN	108.864	0.0854898
Dengue / QC	_HYDGSYSTFGERYGR_	P01023	4.16393	4.16393	2.74301e-14	2.41697e-13	52	P01023	A2M	Alpha-2-macroglobulin	A2MG_HUMAN	1	1692.53	17.9253	Dengue	QC	NaN	NaN	NaN	35.3739	0.293901
Dengue / QC	_ALVDTLKFVTQAEGAK_	P04114	2.19561	2.19561	2.76679e-14	2.43428e-13	68	P04114	APOB	Apolipoprotein B-100	APOB_HUMAN	1	358.085	4.58085	Dengue	QC	NaN	NaN	NaN	53.4466	0.187268
Dengue / QC	_QLVHHFEIDVDIFEPQGISK_	P19827	1.02687	1.02687	2.82029e-14	2.47765e-13	164	P19827	ITIH1	Inter-alpha-trypsin inhibitor heavy chain H1	ITIH1_HUMAN	1	103.76	2.0376	Dengue	QC	NaN	NaN	NaN	113.944	0.0934397
Dengue / QC	_LLRDADDLQK_	P02649	1.08495	1.08495	2.93352e-14	2.56563e-13	50	P02649	APOE	Apolipoprotein E	APOE_HUMAN	1	112.13	2.1213	Dengue	QC	NaN	NaN	NaN	34.6775	0.179594
Dengue / QC	_AVVEVDESGTR_	P05154	3.19693	3.19693	3.06159e-14	2.66971e-13	48	P05154	SERPINA5	Plasma serine protease inhibitor	IPSP_HUMAN	1	817.005	9.17005	Dengue	QC	NaN	NaN	NaN	39.7295	0.282724
Dengue / QC	_IAQLPLTGSMSIIFFLPLK_	P36955	0.966414	0.966414	3.20465e-14	2.77799e-13	84	P36955	SERPINF1	Pigment epithelium-derived factor	PEDF_HUMAN	1	95.3978	1.95398	Dengue	QC	NaN	NaN	NaN	47.0811	0.0993218
Dengue / QC	_GSWYSMR_	P02675	2.96747	2.96747	3.41569e-14	2.93929e-13	112	P02675	FGB	Fibrinogen beta chain	FIBB_HUMAN	1	682.162	7.82162	Dengue	QC	NaN	NaN	NaN	82.5009	0.311062
Dengue / QC	_C[Carbamidomethyl (C)]STSSLLEAC[Carbamidomethyl (C)]TFRRP_	P02787	3.8458	3.8458	3.47607e-14	2.98253e-13	102	P02787	TF	Serotransferrin	TRFE_HUMAN	1	1337.81	14.3781	Dengue	QC	NaN	NaN	NaN	63.8838	0.354329
Dengue / QC	_AGELEVFNGYFVHFFAPDNLDPIPK_	P19823	0.920134	0.920134	3.53405e-14	3.02786e-13	168	P19823	ITIH2	Inter-alpha-trypsin inhibitor heavy chain H2	ITIH2_HUMAN	1	89.2291	1.89229	Dengue	QC	NaN	NaN	NaN	117.247	0.0950648
Dengue / QC	_QFPILLDFKTK_	P05546	0.92736	0.92736	3.54188e-14	3.03016e-13	92	P05546	SERPIND1	Heparin cofactor 2	HEP2_HUMAN	1	90.1792	1.90179	Dengue	QC	NaN	NaN	NaN	82.3778	0.0978814
Dengue / QC	_GEC[Carbamidomethyl (C)]QAEGVLFFQGDR_	P02790	0.827411	0.827411	3.54799e-14	3.03098e-13	90	P02790	HPX	Hemopexin	HEMO_HUMAN	1	77.4498	1.7745	Dengue	QC	NaN	NaN	NaN	67.7415	0.0947614
Dengue / QC	_GIVAAFYSGPSLSDKEK_	P80108	0.868034	0.868034	3.82841e-14	3.2423e-13	48	P80108	GPLD1	Phosphatidylinositol-glycan-specific phospholipase D	PHLD_HUMAN	1	82.5174	1.82517	Dengue	QC	NaN	NaN	NaN	40.7022	0.0990687
Dengue / QC	_SLAPYAQDTQEKLNHQLEGLTFQMK_	P06727	1.06677	1.06677	4.24926e-14	3.56792e-13	112	P06727	APOA4	Apolipoprotein A-IV	APOA4_HUMAN	1	109.474	2.09474	Dengue	QC	NaN	NaN	NaN	105.705	0.115981
Dengue / QC	_DYELLC[Carbamidomethyl (C)]LDGTRK_	P02787	2.059	2.059	4.33288e-14	3.63295e-13	78	P02787	TF	Serotransferrin	TRFE_HUMAN	1	316.697	4.16697	Dengue	QC	NaN	NaN	NaN	40.9163	0.18006
Dengue / QC	_C[Carbamidomethyl (C)]PAPELLGGPSVFLFPPKPKDTLMISR_	P01860	4.14876	4.14876	4.60576e-14	3.85078e-13	34	P01860	IGHG3	Immunoglobulin heavy constant gamma 3	IGHG3_HUMAN	1	1673.79	17.7379	Dengue	QC	NaN	NaN	NaN	23.997	0.250385
Dengue / QC	_M[Oxidation (M)]YSVNGYTFGSLPGLSMC[Carbamidomethyl (C)]AEDR_	P00450	-0.097324	0.097324	4.61391e-14	3.85212e-13	40	P00450	CP	Ceruloplasmin	CERU_HUMAN	1	-6.52347	0.934765	Dengue	QC	NaN	NaN	NaN	19.9514	0.268211
Dengue / QC	_ALDYYMLR_	Q9Y490	1.48638	1.48638	5.46475e-14	4.52398e-13	34	Q9Y490	TLN1	Talin-1	TLN1_HUMAN	1	180.184	2.80184	Dengue	QC	NaN	NaN	NaN	27.695	0.123787
Dengue / QC	_SYLSMVGSC[Carbamidomethyl (C)]C[Carbamidomethyl (C)]TSASPTVC[Carbamidomethyl (C)]FLK_	P02774;P02774-3	0.572598	0.572598	5.47864e-14	4.52911e-13	116	P02774;P02774-3	GC	Vitamin D-binding protein;Isoform 3 of Vitamin D-binding protein	VTDB_HUMAN	1	48.72	1.4872	Dengue	QC	NaN	NaN	NaN	105.731	0.0780228
Dengue / QC	_LELELRPTGEIEQYSVSATYELQR_	P04114	0.742183	0.742183	5.76422e-14	4.7452e-13	150	P04114	APOB	Apolipoprotein B-100	APOB_HUMAN	1	67.2705	1.6727	Dengue	QC	NaN	NaN	NaN	121.746	0.0860897
Dengue / QC	_ITTGGDVINNGLWNMVSVEELEHSISIK_	P07225	0.718534	0.718534	6.06441e-14	4.97146e-13	132	P07225	PROS1	Vitamin K-dependent protein S	PROS_HUMAN	1	64.5509	1.64551	Dengue	QC	NaN	NaN	NaN	112.467	0.0932793
Dengue / QC	_AINEKLGQYASPTAKR_	P0C0L5	3.3632	3.3632	6.20514e-14	5.0727e-13	52	P0C0L5	C4B	Complement C4-B	CO4B_HUMAN	1	929.022	10.2902	Dengue	QC	NaN	NaN	NaN	34.1874	0.264153
Dengue / QC	_RC[Carbamidomethyl (C)]C[Carbamidomethyl (C)]QDGVTRLPMMR_	P0C0L5	2.88358	2.88358	6.69957e-14	5.45613e-13	74	P0C0L5	C4B	Complement C4-B	CO4B_HUMAN	1	637.978	7.37978	Dengue	QC	NaN	NaN	NaN	64.2997	0.237661
Dengue / QC	_REEAPSLRPAPPPISGGGYR_	P02675	3.49842	3.49842	6.70198e-14	5.45613e-13	72	P02675	FGB	Fibrinogen beta chain	FIBB_HUMAN	1	1030.13	11.3013	Dengue	QC	NaN	NaN	NaN	55.7179	0.29966
Dengue / QC	_MKPVPDLVPGNFK_	P02671	3.19809	3.19809	6.87671e-14	5.59065e-13	90	P02671	FGA	Fibrinogen alpha chain	FIBA_HUMAN	1	817.745	9.17745	Dengue	QC	NaN	NaN	NaN	70.2169	0.318256
Dengue / QC	_GTLSTTITGR_	P08519	1.5565	1.5565	7.01827e-14	5.69002e-13	96	P08519	LPA	Apolipoprotein(a)	APOA_HUMAN	1	194.139	2.94139	Dengue	QC	NaN	NaN	NaN	70.6842	0.157517
Dengue / QC	_TFSEWLESVKENPAVIDFELAPIVDLVR_	P13671	1.20323	1.20323	7.48631e-14	6.04451e-13	78	P13671	C6	Complement component C6	CO6_HUMAN	1	130.255	2.30255	Dengue	QC	NaN	NaN	NaN	58.5577	0.13139
Dengue / QC	_VTISVDK_	A0A075B6R2	0.908272	0.908272	8.06773e-14	6.48725e-13	72	A0A075B6R2	IGHV4-4	Immunoglobulin heavy variable 4-4	HV404_HUMAN	1	87.6796	1.8768	Dengue	QC	NaN	NaN	NaN	63.176	0.0918155
Dengue / QC	_MC[Carbamidomethyl (C)]VDVNEC[Carbamidomethyl (C)]QRYPGR_	P23142	3.39834	3.39834	8.70486e-14	6.94266e-13	78	P23142	FBLN1	Fibulin-1	FBLN1_HUMAN	1	954.395	10.544	Dengue	QC	NaN	NaN	NaN	56.7489	0.323277
Dengue / QC	_GGETSEM[Oxidation (M)]YLIQPDSSVKPYR_	P02675	4.09162	4.09162	9.10468e-14	7.25171e-13	52	P02675	FGB	Fibrinogen beta chain	FIBB_HUMAN	1	1604.91	17.0491	Dengue	QC	NaN	NaN	NaN	35.9847	0.3069
Dengue / QC	_KVFLDC[Carbamidomethyl (C)]C[Carbamidomethyl (C)]NYITELR_	P01024	1.14306	1.14306	9.35005e-14	7.42704e-13	46	P01024	C3	Complement C3	CO3_HUMAN	1	120.849	2.20849	Dengue	QC	NaN	NaN	NaN	34.0759	0.0910341
Dengue / QC	_GRFPLYNLGFGHNVDFNFLEVMSMENNGR_	P19827	1.42966	1.42966	9.90882e-14	7.84971e-13	42	P19827	ITIH1	Inter-alpha-trypsin inhibitor heavy chain H1	ITIH1_HUMAN	1	169.383	2.69383	Dengue	QC	NaN	NaN	NaN	25.2083	0.156915
Dengue / QC	_ALVLIAFAQY[Hex]LQQC[Carbamidomethyl (C)]PFEDHVKLVNEVTEFAK_	P02768	0.935692	0.935692	1.2339e-13	9.56878e-13	82	P02768	ALB	Serum albumin	ALBU_HUMAN	1	91.2808	1.91281	Dengue	QC	NaN	NaN	NaN	65.3435	0.120406
Dengue / QC	_DLLAGLPAPGVEVYC[Carbamidomethyl (C)]LYGVGLPTPR_	P04180	0.709098	0.709098	1.24274e-13	9.62472e-13	82	P04180	LCAT	Phosphatidylcholine-sterol acyltransferase	LCAT_HUMAN	1	63.4781	1.63478	Dengue	QC	NaN	NaN	NaN	33.4592	0.0756524
Dengue / QC	_VTEENKELANELR_	P07996	1.24313	1.24313	1.35301e-13	1.04512e-12	36	P07996	THBS1	Thrombospondin-1	TSP1_HUMAN	1	136.712	2.36712	Dengue	QC	NaN	NaN	NaN	18.4951	0.0730412
Dengue / QC	_NNNEKDMALTAFVLISLQEAKDIC[Carbamidomethyl (C)]EEQVNSLPGSITK_	P01024	0.949806	0.949806	1.36103e-13	1.04994e-12	172	P01024	C3	Complement C3	CO3_HUMAN	1	93.1614	1.93161	Dengue	QC	NaN	NaN	NaN	131.216	0.100436
Dengue / QC	_ESSSHHPGIAEFPSRGK_	P02671	3.57268	3.57268	1.3779e-13	1.06156e-12	34	P02671	FGA	Fibrinogen alpha chain	FIBA_HUMAN	1	1089.83	11.8983	Dengue	QC	NaN	NaN	NaN	27.4236	0.217457
Dengue / QC	_NVVFVIDKSGSMSGRK_	Q14624	1.55154	1.55154	1.38844e-13	1.06829e-12	64	Q14624	ITIH4	Inter-alpha-trypsin inhibitor heavy chain H4	ITIH4_HUMAN	1	193.13	2.9313	Dengue	QC	NaN	NaN	NaN	52.2564	0.169863
Dengue / QC	_FVC[Carbamidomethyl (C)]NSGYKIEGDEEM[Oxidation (M)]HC[Carbamidomethyl (C)]SDDGFWSK_	P08603	0.205875	0.205875	1.48029e-13	1.1345e-12	28	P08603	CFH	Complement factor H	CFAH_HUMAN	1	15.3386	1.15339	Dengue	QC	NaN	NaN	NaN	13.8421	0.269754
Dengue / QC	_SETAEELKK_	O14791;O14791-2	0.85696	0.85696	1.48647e-13	1.13628e-12	156	O14791;O14791-2	APOL1	Apolipoprotein L1;Isoform 2 of Apolipoprotein L1	APOL1_HUMAN	1	81.1217	1.81122	Dengue	QC	NaN	NaN	NaN	115.658	0.105109
Dengue / QC	_ATWSGAVLAGRDAVLR_	P04217	3.96927	3.96927	1.53252e-13	1.16996e-12	60	P04217	A1BG	Alpha-1B-glycoprotein	A1BG_HUMAN	1	1466.28	15.6628	Dengue	QC	NaN	NaN	NaN	40.9751	0.343594
Dengue / QC	_NYAEAKDVFLGMFLYEYARR_	P02768	1.92642	1.92642	1.56717e-13	1.19177e-12	64	P02768	ALB	Serum albumin	ALBU_HUMAN	1	280.111	3.80111	Dengue	QC	NaN	NaN	NaN	47.4507	0.163812
Dengue / QC	_HRQIVVDKYYQENFC[Carbamidomethyl (C)]EQIC[Carbamidomethyl (C)]SK_	P13671	2.7025	2.7025	1.78692e-13	1.34155e-12	32	P13671	C6	Complement component C6	CO6_HUMAN	1	550.93	6.5093	Dengue	QC	NaN	NaN	NaN	24.635	0.197404
Dengue / QC	_KC[Carbamidomethyl (C)]YFPYLENGYNQNHGR_	Q5TFM2	1.37448	1.37448	1.84304e-13	1.38156e-12	60	Q5TFM2	CFH	Complement factor H	Q5TFM2_HUMAN	1	159.275	2.59275	Dengue	QC	NaN	NaN	NaN	50.9714	0.130646
Dengue / QC	_SGKFTC[Carbamidomethyl (C)]KVPGLYYFTYHASSR_	D6R934;P02746	2.34169	2.34169	1.89154e-13	1.4112e-12	58	D6R934;P02746	C1QB	Complement C1q subcomponent subunit B	D6R934_HUMAN;C1QB_HUMAN	1	406.896	5.06896	Dengue	QC	NaN	NaN	NaN	46.9818	0.21624
Dengue / QC	_GSFSTTVTGR_	P08519	1.55555	1.55555	1.93344e-13	1.43872e-12	138	P08519	LPA	Apolipoprotein(a)	APOA_HUMAN	1	193.947	2.93947	Dengue	QC	NaN	NaN	NaN	122.755	0.188257
Dengue / QC	_IIRSSEDPNEDIVER_	P01591	4.19049	4.19049	2.00353e-13	1.48523e-12	34	P01591	JCHAIN	Immunoglobulin J chain	IGJ_HUMAN	1	1725.84	18.2584	Dengue	QC	NaN	NaN	NaN	22.5861	0.24539
Dengue / QC	_QSNNKYAASSYLSLTPEQWKSHR_	P0DOY2	3.35493	3.35493	2.04936e-13	1.5173e-12	80	P0DOY2	IGLC2	Immunoglobulin lambda constant 2	IGLC2_HUMAN	1	923.141	10.2314	Dengue	QC	NaN	NaN	NaN	61.6096	0.302351
Dengue / QC	_AGAAPYVQAFDSLLAGPVAEYLK_	Q01518;Q5T0R1;Q5T0R2;Q5T0R3;Q5T0R4;Q5T0R5;Q5T0R6;Q5T0R7	1.17903	1.17903	2.27917e-13	1.68321e-12	42	Q01518;Q5T0R1;Q5T0R2;Q5T0R3;Q5T0R4;Q5T0R5;Q5T0R6;Q5T0R7	CAP1	Adenylyl cyclase-associated protein 1;Adenylyl cyclase-associated protein 1 (Fragment);Adenylyl cyclase-associated protein 1 (Fragment);Adenylyl cyclase-associated protein 1 (Fragment);Adenylyl cyclase-associated protein 1 (Fragment);Adenylyl cyclase-associated protein 1 (Fragment);Adenylyl cyclase-associated protein 1 (Fragment);Adenylyl cyclase-associated protein 1 (Fragment)	CAP1_HUMAN;Q5T0R1_HUMAN;Q5T0R2_HUMAN;Q5T0R3_HUMAN;Q5T0R4_HUMAN;Q5T0R5_HUMAN;Q5T0R6_HUMAN;Q5T0R7_HUMAN	1	126.425	2.26425	Dengue	QC	NaN	NaN	NaN	32.2178	0.128899
Dengue / QC	_LWAYLTINQLLAER_	P19823	1.5072	1.5072	2.36582e-13	1.74501e-12	68	P19823	ITIH2	Inter-alpha-trypsin inhibitor heavy chain H2	ITIH2_HUMAN	1	184.258	2.84258	Dengue	QC	NaN	NaN	NaN	37.0428	0.180137
Dengue / QC	_SRWQQGNIFSC[Carbamidomethyl (C)]SVM[Oxidation (M)]HEALHNR_	P01860	0.374879	0.374879	2.44123e-13	1.79166e-12	22	P01860	IGHG3	Immunoglobulin heavy constant gamma 3	IGHG3_HUMAN	1	29.6731	1.29673	Dengue	QC	NaN	NaN	NaN	13.1004	0.135046
Dengue / QC	_GDIGETGVPGAEGPR_	Q15848	0.548466	0.548466	2.45163e-13	1.79704e-12	106	Q15848	ADIPOQ	Adiponectin	ADIPO_HUMAN	1	46.253	1.46253	Dengue	QC	NaN	NaN	NaN	78.5698	0.0898091
Dengue / QC	_ENFVLTTAK_	P22891;P22891-2	0.825181	0.825181	2.67418e-13	1.94805e-12	62	P22891;P22891-2	PROZ	Vitamin K-dependent protein Z;Isoform 2 of Vitamin K-dependent protein Z	PROZ_HUMAN	1	77.1758	1.77176	Dengue	QC	NaN	NaN	NaN	55.9271	0.0993392
Dengue / QC	_YTIAALLSPYSYSTTAVVTNPK_	P02766	0.964522	0.964522	2.75995e-13	2.00265e-12	74	P02766	TTR	Transthyretin	TTHY_HUMAN	1	95.1417	1.95142	Dengue	QC	NaN	NaN	NaN	32.4954	0.0797177
Dengue / QC	_MGPSSAVPGDSMQLAITGGNEEGFFTTR_	P23142-4	1.08264	1.08264	2.76275e-13	2.00265e-12	116	P23142-4	FBLN1	Isoform C of Fibulin-1	FBLN1_HUMAN	1	111.791	2.11791	Dengue	QC	NaN	NaN	NaN	104.85	0.134674
Dengue / QC	_TPKSPVGVQPILNEHTFC[Carbamidomethyl (C)]AGMSK_	P00738	3.05558	3.05558	2.79142e-13	2.02094e-12	94	P00738	HP	Haptoglobin	HPT_HUMAN	1	731.424	8.31424	Dengue	QC	NaN	NaN	NaN	54.6002	0.304942
Dengue / QC	_LTVDKSRWQQGNVFSC[Carbamidomethyl (C)]SVM[Oxidation (M)]HEALHNHYTQK_	P01857	0.877536	0.877536	2.96002e-13	2.13513e-12	66	P01857	IGHG1	Immunoglobulin heavy constant gamma 1	IGHG1_HUMAN	1	83.7234	1.83723	Dengue	QC	NaN	NaN	NaN	31.0502	0.678599
Dengue / QC	_C[Carbamidomethyl (C)]FDHAAGTSYVVGETWEKPYQGWMMVDC[Carbamidomethyl (C)]TC[Carbamidomethyl (C)]LGEGSGR_	P02751;P02751-15;P02751-3;P02751-7	1.63907	1.63907	3.01146e-13	2.16693e-12	50	P02751;P02751-15;P02751-3;P02751-7	FN1	Fibronectin;Isoform 15 of Fibronectin;Isoform 3 of Fibronectin;Isoform 7 of Fibronectin	FINC_HUMAN	1	211.465	3.11465	Dengue	QC	NaN	NaN	NaN	45.0987	0.154582
Dengue / QC	_YEASILTHDSSIR_	P02679;P02679-2	2.32284	2.32284	3.07492e-13	2.20989e-12	66	P02679;P02679-2	FGG	Fibrinogen gamma chain;Isoform Gamma-A of Fibrinogen gamma chain	FIBG_HUMAN	1	400.316	5.00316	Dengue	QC	NaN	NaN	NaN	43.8126	0.200919
Dengue / QC	_NFATSNKM[Oxidation (M)]DMTFSK_	P04114	1.19049	1.19049	3.34739e-13	2.38821e-12	36	P04114	APOB	Apolipoprotein B-100	APOB_HUMAN	1	128.231	2.28231	Dengue	QC	NaN	NaN	NaN	20.466	0.0860265
Dengue / QC	_EDGGGWWYNR_	P02675	2.86824	2.86824	3.46349e-13	2.46507e-12	120	P02675	FGB	Fibrinogen beta chain	FIBB_HUMAN	1	630.172	7.30172	Dengue	QC	NaN	NaN	NaN	89.7672	0.312514
Dengue / QC	_SFAAGIQALGGTNINDAMLMAVQLLDSSNQEER_	Q14624	0.897025	0.897025	3.6862e-13	2.61724e-12	128	Q14624	ITIH4	Inter-alpha-trypsin inhibitor heavy chain H4	ITIH4_HUMAN	1	86.2222	1.86222	Dengue	QC	NaN	NaN	NaN	33.4218	0.0796971
Dengue / QC	_DRQHLPLIK_	P02671	2.17266	2.17266	3.76197e-13	2.66782e-12	34	P02671	FGA	Fibrinogen alpha chain	FIBA_HUMAN	1	350.854	4.50854	Dengue	QC	NaN	NaN	NaN	29.4951	0.152799
Dengue / QC	_LSFYYLIMAK_	P01023	0.907598	0.907598	3.91171e-13	2.76402e-12	122	P01023	A2M	Alpha-2-macroglobulin	A2MG_HUMAN	1	87.592	1.87592	Dengue	QC	NaN	NaN	NaN	104.027	0.130384
Dengue / QC	_RLWWLDLKSGAQATWTELPWPHEK_	P02790	1.12618	1.12618	3.94868e-13	2.78681e-12	146	P02790	HPX	Hemopexin	HEMO_HUMAN	1	118.28	2.1828	Dengue	QC	NaN	NaN	NaN	139.795	0.119324
Dengue / QC	_VTIM[Oxidation (M)]WTPPESAVTGYRVDVIPVNLPGEHGQR_	P02751;P02751-15;P02751-3;P02751-7	0.447482	0.447482	4.41796e-13	3.08837e-12	100	P02751;P02751-15;P02751-3;P02751-7	FN1	Fibronectin;Isoform 15 of Fibronectin;Isoform 3 of Fibronectin;Isoform 7 of Fibronectin	FINC_HUMAN	1	36.3658	1.36366	Dengue	QC	NaN	NaN	NaN	52.7659	0.195767
Dengue / QC	_IYEDHDATQQLQGFYSQVAKPLLVDVDLQYPQDAVLALTQNHHK_	P19827	0.751063	0.751063	4.81989e-13	3.33371e-12	170	P19827	ITIH1	Inter-alpha-trypsin inhibitor heavy chain H1	ITIH1_HUMAN	1	68.3033	1.68303	Dengue	QC	NaN	NaN	NaN	127.524	0.0795625
Dengue / QC	_RMPC[Carbamidomethyl (C)]AEDYLSVVLN[Hex]QLC[Carbamidomethyl (C)]VLHEKTPVSDR_	P02768	0.0646068	0.0646068	4.81614e-13	3.33371e-12	158	P02768	ALB	Serum albumin	ALBU_HUMAN	1	4.57999	1.0458	Dengue	QC	NaN	NaN	NaN	64.0903	0.0676304
Dengue / QC	_VAQLEAQC[Carbamidomethyl (C)]QEPC[Carbamidomethyl (C)]KDTVQIHDITGKDC[Carbamidomethyl (C)]QDIANK_	P02679;P02679-2	2.5722	2.5722	5.08415e-13	3.51236e-12	40	P02679;P02679-2	FGG	Fibrinogen gamma chain;Isoform Gamma-A of Fibrinogen gamma chain	FIBG_HUMAN	1	494.714	5.94714	Dengue	QC	NaN	NaN	NaN	33.4729	0.203367
Dengue / QC	_TVIGPDGHKEVTK_	P02671	2.87769	2.87769	5.09895e-13	3.51846e-12	90	P02671	FGA	Fibrinogen alpha chain	FIBA_HUMAN	1	634.972	7.34972	Dengue	QC	NaN	NaN	NaN	67.6016	0.335797
Dengue / QC	_GGETAQSADPQWEQLNNK_	P05546	0.615481	0.615481	5.15184e-13	3.54663e-12	98	P05546	SERPIND1	Heparin cofactor 2	HEP2_HUMAN	1	53.2069	1.53207	Dengue	QC	NaN	NaN	NaN	43.1797	0.0685086
Dengue / QC	_ATEVPVSWESFNNGDC[Carbamidomethyl (C)]FILDLGNNIHQWC[Carbamidomethyl (C)]GSNSNRYER_	P06396	1.27098	1.27098	5.4493e-13	3.7383e-12	42	P06396	GSN	Gelsolin	GELS_HUMAN	1	141.326	2.41326	Dengue	QC	NaN	NaN	NaN	30.0841	0.11176
Dengue / QC	_QGDVEC[Carbamidomethyl (C)]QR_	P13671	1.16625	1.16625	5.4663e-13	3.74559e-12	90	P13671	C6	Complement component C6	CO6_HUMAN	1	124.428	2.24428	Dengue	QC	NaN	NaN	NaN	34.004	0.132314
Dengue / QC	_RVELKTPLGDTTHTC[Carbamidomethyl (C)]PR_	P01860	3.50966	3.50966	5.6667e-13	3.87389e-12	58	P01860	IGHG3	Immunoglobulin heavy constant gamma 3	IGHG3_HUMAN	1	1038.98	11.3898	Dengue	QC	NaN	NaN	NaN	38.8448	0.318283
Dengue / QC	_C[Carbamidomethyl (C)]C[Carbamidomethyl (C)]AAADPHEC[Carbamidomethyl (C)]YAKVFDEFKPLVEEPQNLIK_	P02768	3.64695	3.64695	5.71017e-13	3.89048e-12	40	P02768	ALB	Serum albumin	ALBU_HUMAN	1	1152.69	12.5269	Dengue	QC	NaN	NaN	NaN	32.6023	0.294348
Dengue / QC	_IADVTSGLIGGEDGR_	P80108	0.350034	0.350034	5.77238e-13	3.92789e-12	158	P80108	GPLD1	Phosphatidylinositol-glycan-specific phospholipase D	PHLD_HUMAN	1	27.459	1.27459	Dengue	QC	NaN	NaN	NaN	146.127	0.0550773
Dengue / QC	_LELELRPTGEIEQYSVSATYELQREDR_	P04114	0.712766	0.712766	5.95888e-13	4.05011e-12	152	P04114	APOB	Apolipoprotein B-100	APOB_HUMAN	1	63.8943	1.63894	Dengue	QC	NaN	NaN	NaN	100.979	0.0850677
Dengue / QC	_VLTGNPRLDLQEINNWVQAQMKGK_	P36955	1.21373	1.21373	6.02524e-13	4.09049e-12	68	P36955	SERPINF1	Pigment epithelium-derived factor	PEDF_HUMAN	1	131.936	2.31936	Dengue	QC	NaN	NaN	NaN	52.4937	0.109265
Dengue / QC	_GGASEHITTLAYQELPTADLM[Oxidation (M)]QEWGDAVQYNPAIIK_	P07358	0.354514	0.354514	6.08725e-13	4.12783e-12	28	P07358	C8B	Complement component C8 beta chain	CO8B_HUMAN	1	27.8555	1.27856	Dengue	QC	NaN	NaN	NaN	14.6914	0.166625
Dengue / QC	_AEDLVGKSLYVSATVILHSGSDMVQAER_	P01024	1.68648	1.68648	6.58282e-13	4.43832e-12	118	P01024	C3	Complement C3	CO3_HUMAN	1	221.871	3.21871	Dengue	QC	NaN	NaN	NaN	104.543	0.175713
Dengue / QC	_ELLALIQLER_	Q16610	0.865129	0.865129	6.88375e-13	4.6359e-12	160	Q16610	ECM1	Extracellular matrix protein 1	ECM1_HUMAN	1	82.1503	1.8215	Dengue	QC	NaN	NaN	NaN	135.241	0.0985287
Dengue / QC	_QMPGKGLEWMGR_	A0A0J9YXX1	0.739384	0.739384	7.19847e-13	4.83127e-12	36	A0A0J9YXX1	IGHV5-10-1	Immunoglobulin heavy variable 5-10-1	HV5X1_HUMAN	1	66.9463	1.66946	Dengue	QC	NaN	NaN	NaN	26.7535	0.0626803
Dengue / QC	_QGENGQMMSC[Carbamidomethyl (C)]TC[Carbamidomethyl (C)]LGNGKGEFK_	P02751;P02751-15;P02751-3;P02751-7	1.9338	1.9338	7.53025e-13	5.03671e-12	36	P02751;P02751-15;P02751-3;P02751-7	FN1	Fibronectin;Isoform 15 of Fibronectin;Isoform 3 of Fibronectin;Isoform 7 of Fibronectin	FINC_HUMAN	1	282.06	3.8206	Dengue	QC	NaN	NaN	NaN	26.3066	0.120796
Dengue / QC	_GLPAPIEKTISK_	P01859	3.70492	3.70492	7.57353e-13	5.05417e-12	68	P01859	IGHG2	Immunoglobulin heavy constant gamma 2	IGHG2_HUMAN	1	1204.04	13.0404	Dengue	QC	NaN	NaN	NaN	40.0177	0.37948
Dengue / QC	_QVKDNENVVNEYSSELEK_	P02675	2.07844	2.07844	7.56537e-13	5.05417e-12	44	P02675	FGB	Fibrinogen beta chain	FIBB_HUMAN	1	322.349	4.22349	Dengue	QC	NaN	NaN	NaN	39.3353	0.192987
Dengue / QC	_TMTIHNGMFFSTYDRDNDGWLTSDPR_	P02675	3.33364	3.33364	7.68868e-13	5.12521e-12	32	P02675	FGB	Fibrinogen beta chain	FIBB_HUMAN	1	908.151	10.0815	Dengue	QC	NaN	NaN	NaN	22.0098	0.201287
Dengue / QC	_WADLSGITK_	P29622	0.884063	0.884063	8.03021e-13	5.34077e-12	36	P29622	SERPINA4	Kallistatin	KAIN_HUMAN	1	84.5566	1.84557	Dengue	QC	NaN	NaN	NaN	29.5115	0.0886639
Dengue / QC	_GVYSSDVFDIFPGTYQTLEMFPR_	P00450	0.590968	0.590968	8.32062e-13	5.52767e-12	176	P00450	CP	Ceruloplasmin	CERU_HUMAN	1	50.6257	1.50626	Dengue	QC	NaN	NaN	NaN	83.242	0.0780984
Dengue / QC	_SRLLATLC[Carbamidomethyl (C)]SAEVC[Carbamidomethyl (C)]QC[Carbamidomethyl (C)]AEGK_	P0C0L5	1.9491	1.9491	9.19352e-13	6.04615e-12	96	P0C0L5	C4B	Complement C4-B	CO4B_HUMAN	1	286.134	3.86134	Dengue	QC	NaN	NaN	NaN	72.2547	0.256734
Dengue / QC	_DLLYIGK_	B4E1Z4	0.864327	0.864327	9.69953e-13	6.36471e-12	62	B4E1Z4	NaN	cDNA FLJ55673, highly similar to Complement factor B (EC 3.4.21.47)	B4E1Z4_HUMAN	1	82.049	1.82049	Dengue	QC	NaN	NaN	NaN	42.8558	0.103146
Dengue / QC	_VTIMWTPPESAVTGYRVDVIPVNLPGEHGQR_	P02751;P02751-15;P02751-3;P02751-7	0.455108	0.455108	9.79438e-13	6.41979e-12	148	P02751;P02751-15;P02751-3;P02751-7	FN1	Fibronectin;Isoform 15 of Fibronectin;Isoform 3 of Fibronectin;Isoform 7 of Fibronectin	FINC_HUMAN	1	37.0885	1.37089	Dengue	QC	NaN	NaN	NaN	119.237	0.0734317
Dengue / QC	_FVTWIEGVMR_	P00747	0.332636	0.332636	1.06555e-12	6.96097e-12	130	P00747	PLG	Plasminogen	PLMN_HUMAN	1	25.9312	1.25931	Dengue	QC	NaN	NaN	NaN	100.922	0.0895043
Dengue / QC	_GDFSSANNRDNTYNR_	P02671	3.68233	3.68233	1.08037e-12	7.02657e-12	52	P02671	FGA	Fibrinogen alpha chain	FIBA_HUMAN	1	1183.78	12.8378	Dengue	QC	NaN	NaN	NaN	36.0627	0.33808
Dengue / QC	_AHYGGFTVQNEANK_	P02675	3.07832	3.07832	1.11682e-12	7.25562e-12	68	P02675	FGB	Fibrinogen beta chain	FIBB_HUMAN	1	744.632	8.44632	Dengue	QC	NaN	NaN	NaN	52.888	0.279673
Dengue / QC	_DGEDQTQDTELVETRPAGDGTFQK_	P05534;P30447	1.27891	1.27891	1.13698e-12	7.37034e-12	46	P05534;P30447	HLA-A	HLA class I histocompatibility antigen, A-24 alpha chain;HLA class I histocompatibility antigen, A-23 alpha chain	1A24_HUMAN;1A23_HUMAN	1	142.656	2.42656	Dengue	QC	NaN	NaN	NaN	37.5884	0.135239
Dengue / QC	_QNC[Carbamidomethyl (C)]ELFEQLGEYKFQNALLVR_	P02768	0.965795	0.965795	1.14692e-12	7.41054e-12	176	P02768	ALB	Serum albumin	ALBU_HUMAN	1	95.3139	1.95314	Dengue	QC	NaN	NaN	NaN	146.336	0.118006
Dengue / QC	_TILDDLRAEDHFSVIDFNQNIR_	P19823	0.78034	0.78034	1.18852e-12	7.67063e-12	120	P19823	ITIH2	Inter-alpha-trypsin inhibitor heavy chain H2	ITIH2_HUMAN	1	71.7535	1.71754	Dengue	QC	NaN	NaN	NaN	99.2825	0.100636
Dengue / QC	_QNC[Carbamidomethyl (C)]ELFEQLGEY[Hex]KFQNALLVR_	P02768	-0.817138	0.817138	1.28945e-12	8.2857e-12	92	P02768	ALB	Serum albumin	ALBU_HUMAN	1	-43.2433	0.567567	Dengue	QC	NaN	NaN	NaN	34.9619	0.457286
Dengue / QC	_ILSVKGLLVGEILSAVLSQEGINILTHLPK_	P01031	1.80014	1.80014	1.30051e-12	8.34764e-12	56	P01031	C5	Complement C5	CO5_HUMAN	1	248.254	3.48254	Dengue	QC	NaN	NaN	NaN	51.3988	0.165883
Dengue / QC	_TAMDVFVC[Carbamidomethyl (C)]TYFM[Oxidation (M)]PAAQLPELPDVELPTNKDVC[Carbamidomethyl (C)]DPGNTK_	P02774;P02774-3	1.18575	1.18575	1.36073e-12	8.7152e-12	110	P02774;P02774-3	GC	Vitamin D-binding protein;Isoform 3 of Vitamin D-binding protein	VTDB_HUMAN	1	127.482	2.27482	Dengue	QC	NaN	NaN	NaN	67.0208	0.158442
Dengue / QC	_C[Carbamidomethyl (C)]LPVTAPENGKIVSSAMEPDREYHFGQAVR_	P08603	3.2832	3.2832	1.47277e-12	9.38175e-12	56	P08603	CFH	Complement factor H	CFAH_HUMAN	1	873.511	9.73511	Dengue	QC	NaN	NaN	NaN	33.2886	0.289637
Dengue / QC	_SDFASNC[Carbamidomethyl (C)]C[Carbamidomethyl (C)]SINSPPLYC[Carbamidomethyl (C)]DSEIDAELKNIL_	P02774;P02774-3	0.824278	0.824278	1.66029e-12	1.05194e-11	152	P02774;P02774-3	GC	Vitamin D-binding protein;Isoform 3 of Vitamin D-binding protein	VTDB_HUMAN	1	77.0649	1.77065	Dengue	QC	NaN	NaN	NaN	125.556	0.117458
Dengue / QC	_QC[Carbamidomethyl (C)]QDLGAFTESMVVFGC[Carbamidomethyl (C)]PN_	P01024	0.905235	0.905235	1.68499e-12	1.06529e-11	140	P01024	C3	Complement C3	CO3_HUMAN	1	87.285	1.87285	Dengue	QC	NaN	NaN	NaN	80.7445	0.0889495
Dengue / QC	_NIPTVNENLENYYLEVNQLEKFDIK_	P51884	1.08674	1.08674	1.69738e-12	1.07197e-11	74	P51884	LUM	Lumican	LUM_HUMAN	1	112.393	2.12393	Dengue	QC	NaN	NaN	NaN	50.6741	0.11678
Dengue / QC	_QLFALYSGNDVTDISDDRFPKPPEIANGYVEHLFR_	P00739	1.85046	1.85046	1.73359e-12	1.09249e-11	28	P00739	HPR	Haptoglobin-related protein	HPTR_HUMAN	1	260.616	3.60616	Dengue	QC	NaN	NaN	NaN	19.0204	0.123937
Dengue / QC	_GSESGIFTNTKESSSHHPGIAEFPSR_	P02671	2.78219	2.78219	1.7505e-12	1.10197e-11	88	P02671	FGA	Fibrinogen alpha chain	FIBA_HUMAN	1	587.896	6.87896	Dengue	QC	NaN	NaN	NaN	60.4839	0.300838
Dengue / QC	_M[Oxidation (M)]KYWGVASFLQK_	P02753;Q5VY30	0.937221	0.937221	1.83699e-12	1.15519e-11	84	P02753;Q5VY30	RBP4	Retinol-binding protein 4;Retinol binding protein 4, plasma, isoform CRA_b	RET4_HUMAN;Q5VY30_HUMAN	1	91.4836	1.91484	Dengue	QC	NaN	NaN	NaN	72.4243	0.105103
Dengue / QC	_LNTDIAGLASAIDMSTNYNSDSLHFSNVFR_	P04114	1.66178	1.66178	1.87214e-12	1.17353e-11	66	P04114	APOB	Apolipoprotein B-100	APOB_HUMAN	1	216.407	3.16407	Dengue	QC	NaN	NaN	NaN	23.8908	0.122264
Dengue / QC	_ENPAVIDFELAPIVDLVR_	P13671	0.649859	0.649859	2.04378e-12	1.2703e-11	136	P13671	C6	Complement component C6	CO6_HUMAN	1	56.9015	1.56901	Dengue	QC	NaN	NaN	NaN	131.096	0.0880316
Dengue / QC	_M[Oxidation (M)]KPVPDLVPGNFK_	P02671	3.2033	3.2033	2.12862e-12	1.31608e-11	30	P02671	FGA	Fibrinogen alpha chain	FIBA_HUMAN	1	821.062	9.21062	Dengue	QC	NaN	NaN	NaN	18.7688	0.162818
Dengue / QC	_TAGWNIPMGLLYNKINHC[Carbamidomethyl (C)]RFDEFFSEGC[Carbamidomethyl (C)]APGSK_	P02787	0.901684	0.901684	2.19112e-12	1.34575e-11	176	P02787	TF	Serotransferrin	TRFE_HUMAN	1	86.8246	1.86825	Dengue	QC	NaN	NaN	NaN	155.849	0.098874
Dengue / QC	_VAC[Carbamidomethyl (C)]EEPPFIENGAANLHSK_	P05160	0.705985	0.705985	2.30035e-12	1.40747e-11	88	P05160	F13B	Coagulation factor XIII B chain	F13B_HUMAN	1	63.1258	1.63126	Dengue	QC	NaN	NaN	NaN	51.1636	0.0696287
Dengue / QC	_VSVFVPPR_	P01871	-0.655367	0.655367	2.47595e-12	1.50864e-11	176	P01871	IGHM	Immunoglobulin heavy constant mu	IGHM_HUMAN	1	-36.5086	0.634914	Dengue	QC	NaN	NaN	NaN	99.8477	0.0825906
Dengue / QC	_TNLESILSYPK_	P05155;P05155-3	1.07966	1.07966	2.73953e-12	1.66407e-11	26	P05155;P05155-3	SERPING1	Plasma protease C1 inhibitor;Isoform 3 of Plasma protease C1 inhibitor	IC1_HUMAN	1	111.353	2.11353	Dengue	QC	NaN	NaN	NaN	20.3801	0.0731339
Dengue / QC	_SASDLTWDNLKGKK_	P02787	3.4988	3.4988	2.75403e-12	1.67115e-11	66	P02787	TF	Serotransferrin	TRFE_HUMAN	1	1030.43	11.3043	Dengue	QC	NaN	NaN	NaN	41.9737	0.337581
Dengue / QC	_HGTDDGVVWMNWK_	P02675	3.34707	3.34707	2.85031e-12	1.72425e-11	116	P02675	FGB	Fibrinogen beta chain	FIBB_HUMAN	1	917.578	10.1758	Dengue	QC	NaN	NaN	NaN	82.95	0.385446
Dengue / QC	_VFLDC[Carbamidomethyl (C)]C[Carbamidomethyl (C)]NYITELR_	P01024	0.827676	0.827676	2.90862e-12	1.75591e-11	106	P01024	C3	Complement C3	CO3_HUMAN	1	77.4824	1.77482	Dengue	QC	NaN	NaN	NaN	89.6452	0.113365
Dengue / QC	_TLNLAQNLLAQLPEELFHPLTSLQTLK_	P22792	0.936834	0.936834	2.91296e-12	1.75673e-11	66	P22792	CPN2	Carboxypeptidase N subunit 2	CPN2_HUMAN	1	91.4323	1.91432	Dengue	QC	NaN	NaN	NaN	60.8833	0.11731
Dengue / QC	_VISTLEEPTPQC[Carbamidomethyl (C)]PTSQGR_	P09172	0.881535	0.881535	3.04485e-12	1.83251e-11	72	P09172	DBH	Dopamine beta-hydroxylase	DOPO_HUMAN	1	84.2334	1.84233	Dengue	QC	NaN	NaN	NaN	35.8861	0.129419
Dengue / QC	_HATKTAKDALSSVQESQVAQQAR_	B0YIW2;P02656	1.6552	1.6552	3.08548e-12	1.85507e-11	52	B0YIW2;P02656	APOC3	Apolipoprotein C-III	B0YIW2_HUMAN;APOC3_HUMAN	1	214.968	3.14968	Dengue	QC	NaN	NaN	NaN	44.2325	0.171115
Dengue / QC	_IQC[Carbamidomethyl (C)]AAGYEQSEHNVC[Carbamidomethyl (C)]QDIDEC[Carbamidomethyl (C)]TAGTHNC[Carbamidomethyl (C)]R_	Q12805;Q12805-2;Q12805-4	1.08706	1.08706	3.15918e-12	1.89358e-11	112	Q12805;Q12805-2;Q12805-4	EFEMP1	EGF-containing fibulin-like extracellular matrix protein 1;Isoform 2 of EGF-containing fibulin-like extracellular matrix protein 1;Isoform 4 of EGF-containing fibulin-like extracellular matrix protein 1	FBLN3_HUMAN	1	112.441	2.12441	Dengue	QC	NaN	NaN	NaN	101.331	0.120027
Dengue / QC	_NPDPVAAPYC[Carbamidomethyl (C)]YTRDPSVR_	P08519	2.54676	2.54676	3.19023e-12	1.91024e-11	34	P08519	LPA	Apolipoprotein(a)	APOA_HUMAN	1	484.321	5.84321	Dengue	QC	NaN	NaN	NaN	29.4818	0.244383
Dengue / QC	_WDPYKQGFGNVATNTDGKNYC[Carbamidomethyl (C)]GLPGEYWLGNDK_	P02675	3.27186	3.27186	3.20807e-12	1.91703e-11	28	P02675	FGB	Fibrinogen beta chain	FIBB_HUMAN	1	865.891	9.65891	Dengue	QC	NaN	NaN	NaN	16.2582	0.156225
Dengue / QC	_SAVTALWGKVNVDEVGGEALGR_	P68871	0.906381	0.906381	3.27479e-12	1.95491e-11	162	P68871	HBB	Hemoglobin subunit beta	HBB_HUMAN	1	87.4338	1.87434	Dengue	QC	NaN	NaN	NaN	139.406	0.130458
Dengue / QC	_VRAATVGSLAGQPLQER_	P02649	0.719168	0.719168	3.35853e-12	1.9968e-11	80	P02649	APOE	Apolipoprotein E	APOE_HUMAN	1	64.6233	1.64623	Dengue	QC	NaN	NaN	NaN	70.6224	0.124251
Dengue / QC	_GIETGSEDLEILPNGLAFISSGLK_	P27169	0.783615	0.783615	3.51343e-12	2.0784e-11	168	P27169	PON1	Serum paraoxonase/arylesterase 1	PON1_HUMAN	1	72.1439	1.72144	Dengue	QC	NaN	NaN	NaN	103.094	0.0861495
Dengue / QC	_AVDQSVLLMKPEAELSVSSVYNLLTVK_	P20742	1.39132	1.39132	3.59868e-12	2.12456e-11	78	P20742	PZP	Pregnancy zone protein	PZP_HUMAN	1	162.319	2.62319	Dengue	QC	NaN	NaN	NaN	56.8039	0.208473
Dengue / QC	_LNLVATPLFLKPGIPYPIKVQVK_	P01031	1.34957	1.34957	3.60377e-12	2.12543e-11	52	P01031	C5	Complement C5	CO5_HUMAN	1	154.836	2.54836	Dengue	QC	NaN	NaN	NaN	20.327	0.112799
Dengue / QC	_SRLSSGLVTAALYGR_	P43251;P43251-2;P43251-3;P43251-4	0.504443	0.504443	3.62835e-12	2.13779e-11	122	P43251;P43251-2;P43251-3;P43251-4	BTD	Biotinidase;Isoform 2 of Biotinidase;Isoform 3 of Biotinidase;Isoform 4 of Biotinidase	BTD_HUMAN	1	41.8575	1.41858	Dengue	QC	NaN	NaN	NaN	102.019	0.118156
Dengue / QC	_GNTEGLQK_	P06727	1.95797	1.95797	3.6447e-12	2.14452e-11	54	P06727	APOA4	Apolipoprotein A-IV	APOA4_HUMAN	1	288.516	3.88516	Dengue	QC	NaN	NaN	NaN	42.11	0.183669
Dengue / QC	_SC[Carbamidomethyl (C)]ESNSPFPVHPGTAEC[Carbamidomethyl (C)]C[Carbamidomethyl (C)]TKEGLER_	P02774;P02774-3	2.86114	2.86114	3.64708e-12	2.14452e-11	130	P02774;P02774-3	GC	Vitamin D-binding protein;Isoform 3 of Vitamin D-binding protein	VTDB_HUMAN	1	626.59	7.2659	Dengue	QC	NaN	NaN	NaN	93.0065	0.314636
Dengue / QC	_WVMVPMMSLHHLTIPYFRDEELSC[Carbamidomethyl (C)]TVVELK_	P01011	1.5837	1.5837	3.71474e-12	2.17562e-11	86	P01011	SERPINA3	Alpha-1-antichymotrypsin	AACT_HUMAN	1	199.738	2.99738	Dengue	QC	NaN	NaN	NaN	74.8763	0.192901
Dengue / QC	_IDQNVEELK_	P06727	0.497631	0.497631	3.75332e-12	2.19603e-11	148	P06727	APOA4	Apolipoprotein A-IV	APOA4_HUMAN	1	41.1893	1.41189	Dengue	QC	NaN	NaN	NaN	138.512	0.0710687
Dengue / QC	_AC[Carbamidomethyl (C)]GAC[Carbamidomethyl (C)]PLWGKC[Carbamidomethyl (C)]DAESSK_	P10643	2.88658	2.88658	3.81737e-12	2.23051e-11	44	P10643	C7	Complement component C7	CO7_HUMAN	1	639.515	7.39515	Dengue	QC	NaN	NaN	NaN	34.9868	0.219771
Dengue / QC	_FPSGTFEQVSQLVK_	P02774;P02774-3	0.780951	0.780951	3.84718e-12	2.24425e-11	56	P02774;P02774-3	GC	Vitamin D-binding protein;Isoform 3 of Vitamin D-binding protein	VTDB_HUMAN	1	71.8263	1.71826	Dengue	QC	NaN	NaN	NaN	45.0277	0.0792738
Dengue / QC	_DPDQTDGLGLSYLSSHIANVER_	P06396	1.26711	1.26711	3.89197e-12	2.26813e-11	54	P06396	GSN	Gelsolin	GELS_HUMAN	1	140.679	2.40679	Dengue	QC	NaN	NaN	NaN	34.5306	0.122456
Dengue / QC	_NYC[Carbamidomethyl (C)]GLPGEYWLGNDK_	P02675	2.28861	2.28861	3.90739e-12	2.27487e-11	82	P02675	FGB	Fibrinogen beta chain	FIBB_HUMAN	1	388.586	4.88586	Dengue	QC	NaN	NaN	NaN	65.6547	0.255028
Dengue / QC	_QGLLPVLESFK_	P02647	1.3758	1.3758	3.95232e-12	2.29875e-11	40	P02647	APOA1	Apolipoprotein A-I	APOA1_HUMAN	1	159.511	2.59511	Dengue	QC	NaN	NaN	NaN	31.6168	0.103277
Dengue / QC	_VELEDWNGR_	P02679;P02679-2	2.77262	2.77262	3.98646e-12	2.31632e-11	122	P02679;P02679-2	FGG	Fibrinogen gamma chain;Isoform Gamma-A of Fibrinogen gamma chain	FIBG_HUMAN	1	583.35	6.8335	Dengue	QC	NaN	NaN	NaN	87.9757	0.31272
Dengue / QC	_RIHEDSDSALQLQDFYQEVANPLLTAVTFEYPSNAVEEVTQNNFR_	Q14624	1.07487	1.07487	4.28796e-12	2.48171e-11	166	Q14624	ITIH4	Inter-alpha-trypsin inhibitor heavy chain H4	ITIH4_HUMAN	1	110.653	2.10653	Dengue	QC	NaN	NaN	NaN	51.2803	0.123443
Dengue / QC	_LLATLC[Carbamidomethyl (C)]SAEVC[Carbamidomethyl (C)]QC[Carbamidomethyl (C)]AEGKC[Carbamidomethyl (C)]PR_	P0C0L5	2.97321	2.97321	4.36991e-12	2.52665e-11	88	P0C0L5	C4B	Complement C4-B	CO4B_HUMAN	1	685.28	7.8528	Dengue	QC	NaN	NaN	NaN	63.7021	0.3293
Dengue / QC	_NIQEYLSILTDPDGKGK_	P04114	0.58122	0.58122	4.50359e-12	2.59629e-11	42	P04114	APOB	Apolipoprotein B-100	APOB_HUMAN	1	49.6113	1.49611	Dengue	QC	NaN	NaN	NaN	25.7868	0.0942598
Dengue / QC	_VQQNVPSGTDTGDPQSKPLGDWAAGTMDPESSIFIEDAIK_	O14791;O14791-2	0.750491	0.750491	4.5651e-12	2.62918e-11	88	O14791;O14791-2	APOL1	Apolipoprotein L1;Isoform 2 of Apolipoprotein L1	APOL1_HUMAN	1	68.2365	1.68237	Dengue	QC	NaN	NaN	NaN	67.0771	0.101279
Dengue / QC	_DC[Carbamidomethyl (C)]NTC[Carbamidomethyl (C)]IC[Carbamidomethyl (C)]R_	P04275	1.58529	1.58529	4.67035e-12	2.67795e-11	42	P04275	VWF	von Willebrand factor	VWF_HUMAN	1	200.069	3.00069	Dengue	QC	NaN	NaN	NaN	36.9803	0.169782
Dengue / QC	_VTFHNKGAYPLSIEPIGVR_	P00450	1.57944	1.57944	4.78603e-12	2.74033e-11	128	P00450	CP	Ceruloplasmin	CERU_HUMAN	1	198.853	2.98853	Dengue	QC	NaN	NaN	NaN	98.4896	0.182755
Dengue / QC	_VVAGVANALAHK_	P68871	2.36018	2.36018	4.79965e-12	2.74545e-11	16	P68871	HBB	Hemoglobin subunit beta	HBB_HUMAN	1	413.435	5.13435	Dengue	QC	NaN	NaN	NaN	11.2473	0.0758594
Dengue / QC	_LTIFKTELR_	P04114	1.13117	1.13117	4.81957e-12	2.75418e-11	138	P04114	APOB	Apolipoprotein B-100	APOB_HUMAN	1	119.037	2.19037	Dengue	QC	NaN	NaN	NaN	124.456	0.149614
Dengue / QC	_SITLFVQEDR_	P07996	0.69084	0.69084	5.02745e-12	2.86186e-11	94	P07996	THBS1	Thrombospondin-1	TSP1_HUMAN	1	61.4223	1.61422	Dengue	QC	NaN	NaN	NaN	89.8221	0.0856278
Dengue / QC	_LKHLIVTPSGC[Carbamidomethyl (C)]GEQNMIGMTPTVIAVHYLDETEQWEK_	P01024	0.672795	0.672795	5.21899e-12	2.96229e-11	118	P01024	C3	Complement C3	CO3_HUMAN	1	59.4158	1.59416	Dengue	QC	NaN	NaN	NaN	76.8875	0.070784
Dengue / QC	_AGAEPASER_	P01042-2	1.85238	1.85238	5.27963e-12	2.99382e-11	74	P01042-2	KNG1	Isoform LMW of Kininogen-1	KNG1_HUMAN	1	261.097	3.61097	Dengue	QC	NaN	NaN	NaN	46.9225	0.168255
Dengue / QC	_DGRWQSIPLC[Carbamidomethyl (C)]VEK_	P08603	2.16407	2.16407	5.34015e-12	3.02523e-11	30	P08603	CFH	Complement factor H	CFAH_HUMAN	1	348.176	4.48176	Dengue	QC	NaN	NaN	NaN	23.3656	0.146067
Dengue / QC	_SVPPSASHVAPTETFTYEWTVPKEVGPTNADPVC[Carbamidomethyl (C)]LAK_	P00450	3.14359	3.14359	5.43511e-12	3.07606e-11	62	P00450	CP	Ceruloplasmin	CERU_HUMAN	1	783.719	8.83719	Dengue	QC	NaN	NaN	NaN	42.5892	0.314295
Dengue / QC	_FTISRDNAKNTLYLQMNSLR_	A0A0B4J1X5	0.51599	0.51599	5.58641e-12	3.14958e-11	156	A0A0B4J1X5	IGHV3-74	Immunoglobulin heavy variable 3-74	HV374_HUMAN	1	42.9975	1.42997	Dengue	QC	NaN	NaN	NaN	112.22	0.186431
Dengue / QC	_LIVHNGYC[Carbamidomethyl (C)]DGRSER_	P02753;Q5VY30	2.86509	2.86509	5.65895e-12	3.18742e-11	66	P02753;Q5VY30	RBP4	Retinol-binding protein 4;Retinol binding protein 4, plasma, isoform CRA_b	RET4_HUMAN;Q5VY30_HUMAN	1	628.581	7.28581	Dengue	QC	NaN	NaN	NaN	54.4851	0.311905
Dengue / QC	_ILGDMQPGDYFDLVLFGTR_	P19827	0.795818	0.795818	5.69668e-12	3.20561e-11	106	P19827	ITIH1	Inter-alpha-trypsin inhibitor heavy chain H1	ITIH1_HUMAN	1	73.6061	1.73606	Dengue	QC	NaN	NaN	NaN	30.8636	0.0982565
Dengue / QC	_EYVLPHFSVSIEPEYNFIGYK_	P01031	0.644017	0.644017	5.80734e-12	3.26164e-11	80	P01031	C5	Complement C5	CO5_HUMAN	1	56.2674	1.56267	Dengue	QC	NaN	NaN	NaN	71.0144	0.100722
Dengue / QC	_EWFWDLATGTMK_	P02790	1.09709	1.09709	5.94194e-12	3.33406e-11	118	P02790	HPX	Hemopexin	HEMO_HUMAN	1	113.923	2.13923	Dengue	QC	NaN	NaN	NaN	69.5705	0.1204
Dengue / QC	_NKC[Carbamidomethyl (C)]YTAVVPLVYGGETK_	P01591	2.89985	2.89985	6.17464e-12	3.46132e-11	62	P01591	JCHAIN	Immunoglobulin J chain	IGJ_HUMAN	1	646.35	7.4635	Dengue	QC	NaN	NaN	NaN	38.2124	0.268478
Dengue / QC	_VREYYFAEAQIADFSDPAFISK_	P05546	0.505029	0.505029	6.20623e-12	3.47572e-11	122	P05546	SERPIND1	Heparin cofactor 2	HEP2_HUMAN	1	41.9152	1.41915	Dengue	QC	NaN	NaN	NaN	106.229	0.0660784
Dengue / QC	_APDVFPIISGC[Carbamidomethyl (C)]R_	A0A0A0MS09;P01880;P01880-2	1.35446	1.35446	6.44324e-12	3.59478e-11	54	A0A0A0MS09;P01880;P01880-2	IGHD	Immunoglobulin heavy constant delta (Fragment);Immunoglobulin heavy constant delta;Isoform 2 of Immunoglobulin heavy constant delta	A0A0A0MS09_HUMAN;IGHD_HUMAN;IGHD_HUMAN	1	155.701	2.55701	Dengue	QC	NaN	NaN	NaN	47.6491	0.17944
Dengue / QC	_QDGSVDFGR_	P02675	3.09578	3.09578	6.60858e-12	3.68005e-11	128	P02675	FGB	Fibrinogen beta chain	FIBB_HUMAN	1	754.916	8.54916	Dengue	QC	NaN	NaN	NaN	101.179	0.361591
Dengue / QC	_VGDRNTEQEEGGEAVHEVEVVIK_	P00742	0.889549	0.889549	6.67645e-12	3.71433e-11	50	P00742	F10	Coagulation factor X	FA10_HUMAN	1	85.2597	1.8526	Dengue	QC	NaN	NaN	NaN	44.4709	0.096079
Dengue / QC	_YSFTIELR_	A0A087WSY5;Q96IY4	0.745748	0.745748	6.85649e-12	3.80729e-11	130	A0A087WSY5;Q96IY4	CPB2	Carboxypeptidase B2	A0A087WSY5_HUMAN;CBPB2_HUMAN	1	67.6844	1.67684	Dengue	QC	NaN	NaN	NaN	75.4673	0.101553
Dengue / QC	_SQDILLSVENTVIYR_	P07225	0.953558	0.953558	7.1388e-12	3.94915e-11	112	P07225	PROS1	Vitamin K-dependent protein S	PROS_HUMAN	1	93.6642	1.93664	Dengue	QC	NaN	NaN	NaN	76.3117	0.117644
Dengue / QC	_VGLSGMAIADVTLLSGFHALRADLEK_	P0C0L5	0.807731	0.807731	7.39689e-12	4.08042e-11	46	P0C0L5	C4B	Complement C4-B	CO4B_HUMAN	1	75.0456	1.75046	Dengue	QC	NaN	NaN	NaN	22.1221	0.225622
Dengue / QC	_WTGRPTC[Carbamidomethyl (C)]RDTSC[Carbamidomethyl (C)]VNPPTVQNAYIVSR_	P08603	3.07076	3.07076	7.71018e-12	4.24132e-11	28	P08603	CFH	Complement factor H	CFAH_HUMAN	1	740.214	8.40214	Dengue	QC	NaN	NaN	NaN	22.9382	0.223374
Dengue / QC	_GNLLQC[Carbamidomethyl (C)]IC[Carbamidomethyl (C)]TGNGRGEWK_	P02751;P02751-15;P02751-3;P02751-7	1.28335	1.28335	7.7351e-12	4.25106e-11	58	P02751;P02751-15;P02751-3;P02751-7	FN1	Fibronectin;Isoform 15 of Fibronectin;Isoform 3 of Fibronectin;Isoform 7 of Fibronectin	FINC_HUMAN	1	143.404	2.43404	Dengue	QC	NaN	NaN	NaN	50.3035	0.165237
Dengue / QC	_KWQEEM[Oxidation (M)]ELYR_	P02647	0.67574	0.67574	7.82766e-12	4.29791e-11	98	P02647	APOA1	Apolipoprotein A-I	APOA1_HUMAN	1	59.7416	1.59742	Dengue	QC	NaN	NaN	NaN	80.2656	0.0747225
Dengue / QC	_TEDTIFLR_	P19652	-0.57823	0.57823	7.95828e-12	4.36556e-11	172	P19652	ORM2	Alpha-1-acid glycoprotein 2	A1AG2_HUMAN	1	-33.0215	0.669785	Dengue	QC	NaN	NaN	NaN	96.9268	0.0773946
Dengue / QC	_ALGISPFHEHAEVVFTANDSGPR_	P02766	0.524091	0.524091	8.36065e-12	4.57775e-11	176	P02766	TTR	Transthyretin	TTHY_HUMAN	1	43.8027	1.43803	Dengue	QC	NaN	NaN	NaN	117.146	0.0639546
Dengue / QC	_GATLALTQVTPQDER_	P43121	0.899312	0.899312	8.90274e-12	4.8475e-11	68	P43121	MCAM	Cell surface glycoprotein MUC18	MUC18_HUMAN	1	86.5176	1.86518	Dengue	QC	NaN	NaN	NaN	31.8933	0.133607
Dengue / QC	_TSTADYAMFK_	P02679;P02679-2	2.84476	2.84476	9.14841e-12	4.97667e-11	132	P02679;P02679-2	FGG	Fibrinogen gamma chain;Isoform Gamma-A of Fibrinogen gamma chain	FIBG_HUMAN	1	618.387	7.18387	Dengue	QC	NaN	NaN	NaN	103.836	0.324676
Dengue / QC	_EAFQLFDR_	B7Z6Z4;F8W1R7;G3V1V0;G3V1Y7;G8JLA2;J3KND3;P60660;P60660-2	0.509614	0.509614	9.166e-12	4.97704e-11	42	B7Z6Z4;F8W1R7;G3V1V0;G3V1Y7;G8JLA2;J3KND3;P60660;P60660-2	MYL6	Myosin light polypeptide 6;Myosin light polypeptide 6;Myosin light polypeptide 6;Myosin light polypeptide 6;Myosin light polypeptide 6;Myosin light polypeptide 6;Myosin light polypeptide 6;Isoform Smooth muscle of Myosin light polypeptide 6	B7Z6Z4_HUMAN;F8W1R7_HUMAN;G3V1V0_HUMAN;G3V1Y7_HUMAN;G8JLA2_HUMAN;J3KND3_HUMAN;MYL6_HUMAN;MYL6_HUMAN	1	42.367	1.42367	Dengue	QC	NaN	NaN	NaN	19.9322	0.315658
Dengue / QC	_ESATITC[Carbamidomethyl (C)]LVTGFSPADVFVQWM[Oxidation (M)]QR_	P01871	1.02546	1.02546	9.36435e-12	5.08005e-11	64	P01871	IGHM	Immunoglobulin heavy constant mu	IGHM_HUMAN	1	103.561	2.03561	Dengue	QC	NaN	NaN	NaN	28.5919	0.0876793
Dengue / QC	_GLEWLGR_	A0A0B4J1U7	-1.13304	1.13304	9.86975e-12	5.33456e-11	176	A0A0B4J1U7	IGHV6-1	Immunoglobulin heavy variable 6-1	HV601_HUMAN	1	-54.4046	0.455954	Dengue	QC	NaN	NaN	NaN	84.827	0.142961
Dengue / QC	_FSDEGTHESQISFTIEGPLTSFGLSNK_	P04114	1.05835	1.05835	1.00591e-11	5.42696e-11	86	P04114	APOB	Apolipoprotein B-100	APOB_HUMAN	1	108.254	2.08254	Dengue	QC	NaN	NaN	NaN	56.6756	0.148597
Dengue / QC	_SMGGKEDLIWELLNQAQEHFGK_	P02787	0.975331	0.975331	1.02579e-11	5.50897e-11	172	P02787	TF	Serotransferrin	TRFE_HUMAN	1	96.6093	1.96609	Dengue	QC	NaN	NaN	NaN	113.05	0.163089
Dengue / QC	_LPSGLPVSLLTLYLDNNKISNIPDEYFK_	P51884	0.70583	0.70583	1.02564e-11	5.50897e-11	38	P51884	LUM	Lumican	LUM_HUMAN	1	63.1083	1.63108	Dengue	QC	NaN	NaN	NaN	32.7159	0.111894
Dengue / QC	_GSWYSMRK_	P02675	2.93559	2.93559	1.0435e-11	5.59896e-11	40	P02675	FGB	Fibrinogen beta chain	FIBB_HUMAN	1	665.07	7.6507	Dengue	QC	NaN	NaN	NaN	29.4079	0.257922
Dengue / QC	_DFALQNPSAVPR_	P35858;P35858-2	0.420205	0.420205	1.06972e-11	5.71878e-11	126	P35858;P35858-2	IGFALS	Insulin-like growth factor-binding protein complex acid labile subunit;Isoform 2 of Insulin-like growth factor-binding protein complex acid labile subunit	ALS_HUMAN	1	33.8118	1.33812	Dengue	QC	NaN	NaN	NaN	118.53	0.0637314
Dengue / QC	_C[Carbamidomethyl (C)]C[Carbamidomethyl (C)]HC[Carbamidomethyl (C)]C[Carbamidomethyl (C)]LLGR_	P23142	1.77561	1.77561	1.06958e-11	5.71878e-11	76	P23142	FBLN1	Fibulin-1	FBLN1_HUMAN	1	242.384	3.42384	Dengue	QC	NaN	NaN	NaN	70.0184	0.242931
Dengue / QC	_EDFTSLSLVLYSR_	P02774;P02774-3	0.807327	0.807327	1.08584e-11	5.79443e-11	136	P02774;P02774-3	GC	Vitamin D-binding protein;Isoform 3 of Vitamin D-binding protein	VTDB_HUMAN	1	74.9966	1.74997	Dengue	QC	NaN	NaN	NaN	120.722	0.114251
Dengue / QC	_VNWEEEAASGLLTSLKDNVPK_	P04114	0.629035	0.629035	1.13188e-11	6.02921e-11	120	P04114	APOB	Apolipoprotein B-100	APOB_HUMAN	1	54.653	1.54653	Dengue	QC	NaN	NaN	NaN	92.3061	0.0914307
Dengue / QC	_VWVYPPEK_	P02790	1.04443	1.04443	1.14354e-11	6.08576e-11	72	P02790	HPX	Hemopexin	HEMO_HUMAN	1	106.256	2.06256	Dengue	QC	NaN	NaN	NaN	58.6126	0.143623
Dengue / QC	_SMGGKEDLIWELLNQAQEHFGKDK_	P02787	0.658074	0.658074	1.14483e-11	6.08715e-11	176	P02787	TF	Serotransferrin	TRFE_HUMAN	1	57.7975	1.57797	Dengue	QC	NaN	NaN	NaN	163.461	0.0959699
Dengue / QC	_LKC[Carbamidomethyl (C)]QPVDC[Carbamidomethyl (C)]GIPESIENGKVEDPESTLFGSVIR_	P09871	1.81918	1.81918	1.14867e-11	6.10205e-11	48	P09871	C1S	Complement C1s subcomponent	C1S_HUMAN	1	252.881	3.52881	Dengue	QC	NaN	NaN	NaN	42.6067	0.217545
Dengue / QC	_SQLQKVPPEWK_	P02671	3.90585	3.90585	1.19383e-11	6.31914e-11	22	P02671	FGA	Fibrinogen alpha chain	FIBA_HUMAN	1	1398.92	14.9892	Dengue	QC	NaN	NaN	NaN	16.4845	0.211505
Dengue / QC	_MDYKGDATVFFILPNQGK_	P29622	0.521242	0.521242	1.20251e-11	6.35404e-11	146	P29622	SERPINA4	Kallistatin	KAIN_HUMAN	1	43.519	1.43519	Dengue	QC	NaN	NaN	NaN	72.5651	0.0736672
Dengue / QC	_NNEEYLALIFEK_	O00391	1.46228	1.46228	1.20258e-11	6.35404e-11	50	O00391	QSOX1	Sulfhydryl oxidase 1	QSOX1_HUMAN	1	175.544	2.75544	Dengue	QC	NaN	NaN	NaN	42.7596	0.130277
Dengue / QC	_TLADLTLLDSPIK_	P04114	0.522624	0.522624	1.29539e-11	6.80776e-11	124	P04114	APOB	Apolipoprotein B-100	APOB_HUMAN	1	43.6565	1.43657	Dengue	QC	NaN	NaN	NaN	81.1131	0.0736371
Dengue / QC	_PLLVDVDLQYPQDAVLALTQNHHK_	P19827	0.867812	0.867812	1.30433e-11	6.8486e-11	108	P19827	ITIH1	Inter-alpha-trypsin inhibitor heavy chain H1	ITIH1_HUMAN	1	82.4894	1.82489	Dengue	QC	NaN	NaN	NaN	93.8906	0.130173
Dengue / QC	_LGFTDLFSK_	P29622	0.533345	0.533345	1.32334e-11	6.93603e-11	64	P29622	SERPINA4	Kallistatin	KAIN_HUMAN	1	44.728	1.44728	Dengue	QC	NaN	NaN	NaN	46.9874	0.102547
Dengue / QC	_LHLDYIGPC[Carbamidomethyl (C)]K_	P09486	0.695148	0.695148	1.33348e-11	6.97675e-11	54	P09486	SPARC	SPARC	SPRC_HUMAN	1	61.9051	1.61905	Dengue	QC	NaN	NaN	NaN	40.9514	0.104707
Dengue / QC	_SVPMVPPGIKYLYLR_	P51884	3.67837	3.67837	1.36256e-11	7.12259e-11	26	P51884	LUM	Lumican	LUM_HUMAN	1	1180.27	12.8027	Dengue	QC	NaN	NaN	NaN	15.2113	0.275324
Dengue / QC	_TENC[Carbamidomethyl (C)]AVLSGAANGK_	E9PHK0;P05452	1.37636	1.37636	1.36774e-11	7.14331e-11	20	E9PHK0;P05452	CLEC3B	Tetranectin	E9PHK0_HUMAN;TETN_HUMAN	1	159.613	2.59613	Dengue	QC	NaN	NaN	NaN	9.68932	0.202015
Dengue / QC	_LLIYDASNRATGIPAR_	P04433	4.96502	4.96502	1.41702e-11	7.3717e-11	56	P04433	IGKV3-11	Immunoglobulin kappa variable 3-11	KV311_HUMAN	1	3023.35	31.2335	Dengue	QC	NaN	NaN	NaN	27.3935	0.42059
Dengue / QC	_FATTFYQHLADSKNDNDNIFLSPLSISTAFAMTK_	P01008	0.79595	0.79595	1.45614e-11	7.55803e-11	104	P01008	SERPINC1	Antithrombin-III	ANT3_HUMAN	1	73.6221	1.73622	Dengue	QC	NaN	NaN	NaN	74.1358	0.121403
Dengue / QC	_RYKAAFTEC[Carbamidomethyl (C)]C[Carbamidomethyl (C)]QAADK_	P02768	3.65717	3.65717	1.49672e-11	7.74821e-11	56	P02768	ALB	Serum albumin	ALBU_HUMAN	1	1161.59	12.6159	Dengue	QC	NaN	NaN	NaN	38.9067	0.317836
Dengue / QC	_LLNLDGTC[Carbamidomethyl (C)]ADSYSFVFSR_	P02753;Q5VY30	0.750605	0.750605	1.61244e-11	8.28893e-11	146	P02753;Q5VY30	RBP4	Retinol-binding protein 4;Retinol binding protein 4, plasma, isoform CRA_b	RET4_HUMAN;Q5VY30_HUMAN	1	68.2499	1.6825	Dengue	QC	NaN	NaN	NaN	105.766	0.10233
Dengue / QC	_YLQEIYNSNNQK_	P02679;P02679-2	1.70221	1.70221	1.6563e-11	8.48473e-11	110	P02679;P02679-2	FGG	Fibrinogen gamma chain;Isoform Gamma-A of Fibrinogen gamma chain	FIBG_HUMAN	1	225.399	3.25399	Dengue	QC	NaN	NaN	NaN	88.6489	0.204852
Dengue / QC	_TPC[Carbamidomethyl (C)]TVSC[Carbamidomethyl (C)]NIPVVSGK_	P02675	2.66121	2.66121	1.70399e-11	8.70524e-11	130	P02675	FGB	Fibrinogen beta chain	FIBB_HUMAN	1	532.563	6.32563	Dengue	QC	NaN	NaN	NaN	101.273	0.332861
Dengue / QC	_LVNEVTEFAKTC[Carbamidomethyl (C)]VADESAENC[Carbamidomethyl (C)]DK_	P02768	2.26725	2.26725	1.70249e-11	8.70524e-11	144	P02768	ALB	Serum albumin	ALBU_HUMAN	1	381.406	4.81406	Dengue	QC	NaN	NaN	NaN	109.094	0.278026
Dengue / QC	_HGTDDGVVWM[Oxidation (M)]NWK_	P02675	3.34895	3.34895	1.76792e-11	9.01729e-11	30	P02675	FGB	Fibrinogen beta chain	FIBB_HUMAN	1	918.904	10.189	Dengue	QC	NaN	NaN	NaN	24.332	0.246346
Dengue / QC	_WEDPGKQLYNVEATSYALLALLQLK_	P01024	0.665256	0.665256	1.8095e-11	9.22139e-11	38	P01024	C3	Complement C3	CO3_HUMAN	1	58.585	1.58585	Dengue	QC	NaN	NaN	NaN	29.5978	0.119609
Dengue / QC	_VSITSITVENVFVK_	P01031	1.19495	1.19495	1.84107e-11	9.36604e-11	58	P01031	C5	Complement C5	CO5_HUMAN	1	128.937	2.28937	Dengue	QC	NaN	NaN	NaN	47.0383	0.145697
Dengue / QC	_N[HexNAc]YAEAKDVFLGM[Oxidation (M)]FLYEYAR_	P02768	1.38643	1.38643	2.07867e-11	1.04752e-10	44	P02768	ALB	Serum albumin	ALBU_HUMAN	1	161.43	2.6143	Dengue	QC	NaN	NaN	NaN	16.0357	0.271253
Dengue / QC	_SYTVAIAGYALAQMGRLKGPLLNK_	P01024	0.761009	0.761009	2.08455e-11	1.04959e-10	122	P01024	C3	Complement C3	CO3_HUMAN	1	69.4676	1.69468	Dengue	QC	NaN	NaN	NaN	79.9453	0.0876382
Dengue / QC	_YLFPGEC[Carbamidomethyl (C)]QYVLVQDYC[Carbamidomethyl (C)]GSNPGTFR_	P04275	1.39015	1.39015	2.10747e-11	1.06022e-10	70	P04275	VWF	von Willebrand factor	VWF_HUMAN	1	162.106	2.62106	Dengue	QC	NaN	NaN	NaN	61.9199	0.185895
Dengue / QC	_FTVDRPFLFLIYEHR_	P05546	0.949981	0.949981	2.13372e-11	1.07251e-10	138	P05546	SERPIND1	Heparin cofactor 2	HEP2_HUMAN	1	93.1848	1.93185	Dengue	QC	NaN	NaN	NaN	71.5186	0.105828
Dengue / QC	_LC[Carbamidomethyl (C)]FFPFVENGHSESSGQTHLEGDTVQIIC[Carbamidomethyl (C)]NTGYR_	Q03591	0.759753	0.759753	2.17956e-11	1.09089e-10	140	Q03591	CFHR1	Complement factor H-related protein 1	FHR1_HUMAN	1	69.3201	1.6932	Dengue	QC	NaN	NaN	NaN	107.513	0.0894441
Dengue / QC	_FSGTWYAMAKK_	P02753;Q5VY30	2.8621	2.8621	2.19692e-11	1.09865e-10	42	P02753;Q5VY30	RBP4	Retinol-binding protein 4;Retinol binding protein 4, plasma, isoform CRA_b	RET4_HUMAN;Q5VY30_HUMAN	1	627.071	7.27071	Dengue	QC	NaN	NaN	NaN	33.606	0.238763
Dengue / QC	_QKTGLDSPTGIDFSDITANSFTVHWIAPR_	P02751;P02751-15;P02751-3;P02751-7	0.907728	0.907728	2.24059e-11	1.11953e-10	86	P02751;P02751-15;P02751-3;P02751-7	FN1	Fibronectin;Isoform 15 of Fibronectin;Isoform 3 of Fibronectin;Isoform 7 of Fibronectin	FINC_HUMAN	1	87.6088	1.87609	Dengue	QC	NaN	NaN	NaN	44.2958	0.126835
Dengue / QC	_GGGAGFISGLSYLELDNPAGNKRR_	P10643	2.68038	2.68038	2.2951e-11	1.1458e-10	30	P10643	C7	Complement component C7	CO7_HUMAN	1	541.024	6.41024	Dengue	QC	NaN	NaN	NaN	24.1477	0.235023
Dengue / QC	_AQLVDMK_	P02671	2.72334	2.72334	2.34776e-11	1.17109e-10	142	P02671	FGA	Fibrinogen alpha chain	FIBA_HUMAN	1	560.402	6.60402	Dengue	QC	NaN	NaN	NaN	119.914	0.340949
Dengue / QC	_AKLPDATPK_	P02774;P02774-3	1.39861	1.39861	2.3572e-11	1.17481e-10	62	P02774;P02774-3	GC	Vitamin D-binding protein;Isoform 3 of Vitamin D-binding protein	VTDB_HUMAN	1	163.647	2.63647	Dengue	QC	NaN	NaN	NaN	35.4486	0.161579
Dengue / QC	_KVFLDC[Carbamidomethyl (C)]C[Carbamidomethyl (C)]NYITELRR_	P01024	0.666377	0.666377	2.37211e-11	1.17925e-10	68	P01024	C3	Complement C3	CO3_HUMAN	1	58.7083	1.58708	Dengue	QC	NaN	NaN	NaN	55.4744	0.0906065
Dengue / QC	_YVM[Oxidation (M)]LPVADQYDC[Carbamidomethyl (C)]ITHYEGSTC[Carbamidomethyl (C)]PK_	P00739	1.05309	1.05309	2.37133e-11	1.17925e-10	56	P00739	HPR	Haptoglobin-related protein	HPTR_HUMAN	1	107.497	2.07497	Dengue	QC	NaN	NaN	NaN	49.7221	0.157773
Dengue / QC	_DMALTAFVLISLQEAKDIC[Carbamidomethyl (C)]EEQVNSLPGSITK_	P01024	1.43863	1.43863	2.41446e-11	1.19525e-10	74	P01024	C3	Complement C3	CO3_HUMAN	1	171.063	2.71063	Dengue	QC	NaN	NaN	NaN	19.9309	0.149943
Dengue / QC	_MEPFHFKNSVIKVPMMNSK_	P05155;P05155-3	1.18826	1.18826	2.43247e-11	1.20214e-10	98	P05155;P05155-3	SERPING1	Plasma protease C1 inhibitor;Isoform 3 of Plasma protease C1 inhibitor	IC1_HUMAN	1	127.878	2.27878	Dengue	QC	NaN	NaN	NaN	69.7732	0.198691
Dengue / QC	_ESGMTMEELK_	P20851;P20851-2	1.05845	1.05845	2.46046e-11	1.21496e-10	36	P20851;P20851-2	C4BPB	C4b-binding protein beta chain;Isoform 2 of C4b-binding protein beta chain	C4BPB_HUMAN	1	108.269	2.08269	Dengue	QC	NaN	NaN	NaN	28.2259	0.095246
Dengue / QC	_FTC[Carbamidomethyl (C)]TVTHTDLPSPLK_	P01871	-0.544598	0.544598	2.60329e-11	1.28056e-10	176	P01871	IGHM	Immunoglobulin heavy constant mu	IGHM_HUMAN	1	-31.4418	0.685582	Dengue	QC	NaN	NaN	NaN	97.8035	0.068127
Dengue / QC	_M[Oxidation (M)]YYSAVEPTKDIFTGLIGPMK_	E9PFZ2	0.561318	0.561318	2.60419e-11	1.28056e-10	90	E9PFZ2	CP	Ceruloplasmin	E9PFZ2_HUMAN	1	47.5617	1.47562	Dengue	QC	NaN	NaN	NaN	65.3858	0.205643
Dengue / QC	_TIHLTMPQLVLQGSYDLQDLLAQAELPAILHTELNLQK_	P01019	1.23228	1.23228	2.73521e-11	1.33827e-10	86	P01019	AGT	Angiotensinogen	ANGT_HUMAN	1	134.937	2.34937	Dengue	QC	NaN	NaN	NaN	64.3431	0.140686
Dengue / QC	_TVIGPDGHK_	P02671	1.74451	1.74451	2.85139e-11	1.38934e-10	72	P02671	FGA	Fibrinogen alpha chain	FIBA_HUMAN	1	235.082	3.35082	Dengue	QC	NaN	NaN	NaN	65.0956	0.244772
Dengue / QC	_GDMFLVANLGTK_	P43251;P43251-2;P43251-3;P43251-4	0.855615	0.855615	2.87333e-11	1.39888e-10	60	P43251;P43251-2;P43251-3;P43251-4	BTD	Biotinidase;Isoform 2 of Biotinidase;Isoform 3 of Biotinidase;Isoform 4 of Biotinidase	BTD_HUMAN	1	80.9529	1.80953	Dengue	QC	NaN	NaN	NaN	46.6376	0.102227
Dengue / QC	_AIFYMNNPSR_	Q9UGM5	0.561662	0.561662	2.93379e-11	1.4236e-10	78	Q9UGM5	FETUB	Fetuin-B	FETUB_HUMAN	1	47.5969	1.47597	Dengue	QC	NaN	NaN	NaN	71.7607	0.066692
Dengue / QC	_LDGSVDFKK_	P02679;P02679-2	3.15622	3.15622	3.0816e-11	1.49286e-10	22	P02679;P02679-2	FGG	Fibrinogen gamma chain;Isoform Gamma-A of Fibrinogen gamma chain	FIBG_HUMAN	1	791.492	8.91492	Dengue	QC	NaN	NaN	NaN	17.1059	0.18095
Dengue / QC	_LEALPNSLLAPLGR_	P35858;P35858-2	0.581485	0.581485	3.12564e-11	1.51295e-10	78	P35858;P35858-2	IGFALS	Insulin-like growth factor-binding protein complex acid labile subunit;Isoform 2 of Insulin-like growth factor-binding protein complex acid labile subunit	ALS_HUMAN	1	49.6389	1.49639	Dengue	QC	NaN	NaN	NaN	56.7101	0.0977504
Dengue / QC	_TSESGELHGLTTEEEFVEGIYKVEIDTK_	P02766	1.17941	1.17941	3.17997e-11	1.53673e-10	176	P02766	TTR	Transthyretin	TTHY_HUMAN	1	126.484	2.26484	Dengue	QC	NaN	NaN	NaN	122.802	0.122259
Dengue / QC	_QLYNVEATSYALLALLQLK_	P01024	0.949525	0.949525	3.27745e-11	1.58124e-10	32	P01024	C3	Complement C3	CO3_HUMAN	1	93.1236	1.93124	Dengue	QC	NaN	NaN	NaN	18.9048	0.103227
Dengue / QC	_NNNEKDMALTAFVLISLQEAK_	P01024	1.14239	1.14239	3.29595e-11	1.58886e-10	142	P01024	C3	Complement C3	CO3_HUMAN	1	120.747	2.20747	Dengue	QC	NaN	NaN	NaN	112.731	0.155753
Dengue / QC	_LVTSKGDKELR_	P02671	3.1307	3.1307	3.37167e-11	1.6227e-10	132	P02671	FGA	Fibrinogen alpha chain	FIBA_HUMAN	1	775.862	8.75862	Dengue	QC	NaN	NaN	NaN	99.187	0.391964
Dengue / QC	_C[Carbamidomethyl (C)]IEGTC[Carbamidomethyl (C)]VC[Carbamidomethyl (C)]KLPYQC[Carbamidomethyl (C)]PK_	E7ETH0;G3XAM2;P05156	2.51881	2.51881	3.42865e-11	1.64743e-10	52	E7ETH0;G3XAM2;P05156	CFI	Complement factor I	E7ETH0_HUMAN;G3XAM2_HUMAN;CFAI_HUMAN	1	473.109	5.73109	Dengue	QC	NaN	NaN	NaN	34.8078	0.263025
Dengue / QC	_DQYKVGEVLK_	P08603	0.857387	0.857387	3.4911e-11	1.67607e-10	130	P08603	CFH	Complement factor H	CFAH_HUMAN	1	81.1754	1.81175	Dengue	QC	NaN	NaN	NaN	94.9776	0.105247
Dengue / QC	_C[Carbamidomethyl (C)]VDVDEC[Carbamidomethyl (C)]APPAEPC[Carbamidomethyl (C)]GK_	P23142	0.679118	0.679118	3.55606e-11	1.70309e-10	142	P23142	FBLN1	Fibulin-1	FBLN1_HUMAN	1	60.1161	1.60116	Dengue	QC	NaN	NaN	NaN	132.688	0.0925921
Dengue / QC	_TC[Carbamidomethyl (C)]QSWSSMTPHWHQR_	P08519	2.31092	2.31092	3.60392e-11	1.72331e-10	58	P08519	LPA	Apolipoprotein(a)	APOA_HUMAN	1	396.199	4.96199	Dengue	QC	NaN	NaN	NaN	44.5204	0.244428
Dengue / QC	_C[Carbamidomethyl (C)]FSSDFMAYDIAC[Carbamidomethyl (C)]DR_	O75882;O75882-2;O75882-3	0.666063	0.666063	3.92843e-11	1.86926e-10	46	O75882;O75882-2;O75882-3	ATRN	Attractin;Isoform 2 of Attractin;Isoform 3 of Attractin	ATRN_HUMAN	1	58.6737	1.58674	Dengue	QC	NaN	NaN	NaN	32.7296	0.0956316
Dengue / QC	_NQGILEFYGDDIALLK_	B4E1Z4	1.15685	1.15685	3.93207e-11	1.86948e-10	46	B4E1Z4	NaN	cDNA FLJ55673, highly similar to Complement factor B (EC 3.4.21.47)	B4E1Z4_HUMAN	1	122.97	2.2297	Dengue	QC	NaN	NaN	NaN	37.1751	0.100101
Dengue / QC	_VGYVSGWGQSDNFKLTDHLK_	P00739	1.2028	1.2028	3.95755e-11	1.87856e-10	134	P00739	HPR	Haptoglobin-related protein	HPTR_HUMAN	1	130.187	2.30187	Dengue	QC	NaN	NaN	NaN	98.6725	0.144044
Dengue / QC	_RLEVDIDIK_	P02671	3.07641	3.07641	4.1322e-11	1.95673e-10	60	P02671	FGA	Fibrinogen alpha chain	FIBA_HUMAN	1	743.512	8.43512	Dengue	QC	NaN	NaN	NaN	47.4257	0.332386
Dengue / QC	_TMFIGGSQLSQK_	P80108	1.28148	1.28148	4.37231e-11	2.05719e-10	26	P80108	GPLD1	Phosphatidylinositol-glycan-specific phospholipase D	PHLD_HUMAN	1	143.088	2.43088	Dengue	QC	NaN	NaN	NaN	16.7079	0.103061
Dengue / QC	_EVGPPLPQEAVPLQK_	Q16610	0.946668	0.946668	4.38883e-11	2.06331e-10	60	Q16610	ECM1	Extracellular matrix protein 1	ECM1_HUMAN	1	92.7416	1.92742	Dengue	QC	NaN	NaN	NaN	52.4271	0.149952
Dengue / QC	_NQVVIAAGR_	P80108	0.623596	0.623596	4.67397e-11	2.18688e-10	150	P80108	GPLD1	Phosphatidylinositol-glycan-specific phospholipase D	PHLD_HUMAN	1	54.0711	1.54071	Dengue	QC	NaN	NaN	NaN	88.763	0.0678718
Dengue / QC	_YTTEIIKC[Carbamidomethyl (C)]PQPK_	B4DPQ0	2.23186	2.23186	4.73209e-11	2.21056e-10	98	B4DPQ0	C1R	Complement C1r subcomponent	B4DPQ0_HUMAN	1	369.74	4.6974	Dengue	QC	NaN	NaN	NaN	73.7803	0.230341
Dengue / QC	_TC[Carbamidomethyl (C)]QDINEC[Carbamidomethyl (C)]ETTNEC[Carbamidomethyl (C)]REDEMC[Carbamidomethyl (C)]WNYHGGFR_	Q12805;Q12805-2;Q12805-4	2.24804	2.24804	4.76728e-11	2.22524e-10	22	Q12805;Q12805-2;Q12805-4	EFEMP1	EGF-containing fibulin-like extracellular matrix protein 1;Isoform 2 of EGF-containing fibulin-like extracellular matrix protein 1;Isoform 4 of EGF-containing fibulin-like extracellular matrix protein 1	FBLN3_HUMAN	1	375.037	4.75037	Dengue	QC	NaN	NaN	NaN	15.9876	0.141024
Dengue / QC	_TPC[Carbamidomethyl (C)]TVSC[Carbamidomethyl (C)]NIPVVSGKEC[Carbamidomethyl (C)]EEIIRK_	P02675	2.9385	2.9385	4.85096e-11	2.2625e-10	80	P02675	FGB	Fibrinogen beta chain	FIBB_HUMAN	1	666.614	7.66614	Dengue	QC	NaN	NaN	NaN	58.1194	0.327042
Dengue / QC	_VLRENADSLQASLRPHADELK_	P06727	0.680068	0.680068	5.10368e-11	2.37097e-10	162	P06727	APOA4	Apolipoprotein A-IV	APOA4_HUMAN	1	60.2215	1.60221	Dengue	QC	NaN	NaN	NaN	111.698	0.0891806
Dengue / QC	_SWFEPLVEDMQR_	P02649	2.00137	2.00137	5.20814e-11	2.41569e-10	20	P02649	APOE	Apolipoprotein E	APOE_HUMAN	1	300.38	4.0038	Dengue	QC	NaN	NaN	NaN	14.5306	0.106952
Dengue / QC	_NPNLPPETVDSLKNILTSNNIDVK_	P05090	0.631067	0.631067	5.29957e-11	2.45065e-10	138	P05090	APOD	Apolipoprotein D	APOD_HUMAN	1	54.871	1.54871	Dengue	QC	NaN	NaN	NaN	117.541	0.0801449
Dengue / QC	_LNILNNNYK_	O14791;O14791-2	0.605974	0.605974	5.57208e-11	2.57032e-10	130	O14791;O14791-2	APOL1	Apolipoprotein L1;Isoform 2 of Apolipoprotein L1	APOL1_HUMAN	1	52.2006	1.52201	Dengue	QC	NaN	NaN	NaN	87.3739	0.101466
Dengue / QC	_LTLQGIISWGSGC[Carbamidomethyl (C)]GDR_	P00748	1.23138	1.23138	5.68841e-11	2.61782e-10	62	P00748	F12	Coagulation factor XII	FA12_HUMAN	1	134.792	2.34792	Dengue	QC	NaN	NaN	NaN	29.318	0.123051
Dengue / QC	_M[Oxidation (M)]PC[Carbamidomethyl (C)]AEDY[Hex]LSVVLNQLC[Carbamidomethyl (C)]VLHEKTPVSDR_	P02768	1.36603	1.36603	5.78947e-11	2.6581e-10	126	P02768	ALB	Serum albumin	ALBU_HUMAN	1	157.761	2.57761	Dengue	QC	NaN	NaN	NaN	117.448	0.205612
Dengue / QC	_VADALTNAVAHVDDMPNALSALSDLHAHKLR_	P69905	1.75608	1.75608	6.24163e-11	2.85235e-10	72	P69905	HBA1	Hemoglobin subunit alpha	HBA_HUMAN	1	237.779	3.37779	Dengue	QC	NaN	NaN	NaN	38.7379	0.143809
Dengue / QC	_TTMKIIPFNRLTIGEGQQHHLGGAK_	P02679;P02679-2	2.60928	2.60928	6.30402e-11	2.87863e-10	32	P02679;P02679-2	FGG	Fibrinogen gamma chain;Isoform Gamma-A of Fibrinogen gamma chain	FIBG_HUMAN	1	510.199	6.10199	Dengue	QC	NaN	NaN	NaN	22.0385	0.193127
Dengue / QC	_APQLRETLLQDFR_	P02760	1.29161	1.29161	6.34451e-11	2.89487e-10	40	P02760	AMBP	Protein AMBP	AMBP_HUMAN	1	144.802	2.44802	Dengue	QC	NaN	NaN	NaN	29.2124	0.140601
Dengue / QC	_YPLYVLK_	A0A087WSY5;Q96IY4	0.967021	0.967021	6.35686e-11	2.89825e-10	48	A0A087WSY5;Q96IY4	CPB2	Carboxypeptidase B2	A0A087WSY5_HUMAN;CBPB2_HUMAN	1	95.48	1.9548	Dengue	QC	NaN	NaN	NaN	38.8809	0.101055
Dengue / QC	_MLQITNTGFEMK_	P20742	2.70308	2.70308	6.55267e-11	2.98291e-10	76	P20742	PZP	Pregnancy zone protein	PZP_HUMAN	1	551.193	6.51193	Dengue	QC	NaN	NaN	NaN	48.9718	0.286625
Dengue / QC	_EDLIWELLNQAQEHFGK_	P02787	1.00502	1.00502	7.06704e-11	3.20961e-10	146	P02787	TF	Serotransferrin	TRFE_HUMAN	1	100.698	2.00698	Dengue	QC	NaN	NaN	NaN	128.8	0.122838
Dengue / QC	_ANPTVTLFPPSSEELQANKATLVC[Carbamidomethyl (C)]LISDFYPGAVTVAWKADGSPVK_	A0A0B4J231;B9A064	2.04469	2.04469	7.28796e-11	3.30485e-10	52	A0A0B4J231;B9A064	IGLL5	Immunoglobulin lambda-like polypeptide 5	A0A0B4J231_HUMAN;IGLL5_HUMAN	1	312.584	4.12584	Dengue	QC	NaN	NaN	NaN	36.1045	0.271594
Dengue / QC	_LGPLVEQGRVR_	P02649	1.69766	1.69766	7.33104e-11	3.32183e-10	46	P02649	APOE	Apolipoprotein E	APOE_HUMAN	1	224.374	3.24374	Dengue	QC	NaN	NaN	NaN	36.0722	0.190226
Dengue / QC	_FTIYNNMFC[Carbamidomethyl (C)]AGFHEGGR_	P00740	0.67039	0.67039	7.66606e-11	3.46562e-10	80	P00740	F9	Coagulation factor IX	FA9_HUMAN	1	59.1503	1.5915	Dengue	QC	NaN	NaN	NaN	73.1942	0.0758111
Dengue / QC	_LEVDIDIK_	P02671	4.13269	4.13269	7.89437e-11	3.56063e-10	26	P02671	FGA	Fibrinogen alpha chain	FIBA_HUMAN	1	1654.13	17.5413	Dengue	QC	NaN	NaN	NaN	19.9536	0.296027
Dengue / QC	_GTGGVVTDFDGDGMLDLILSHGESMAQPLSVFR_	A0A0C4DFP6;Q9NQ79;Q9NQ79-2	2.29682	2.29682	8.06429e-11	3.62893e-10	48	A0A0C4DFP6;Q9NQ79;Q9NQ79-2	CRTAC1	Cartilage acidic protein 1;Cartilage acidic protein 1;Isoform 2 of Cartilage acidic protein 1	A0A0C4DFP6_HUMAN;CRAC1_HUMAN;CRAC1_HUMAN	1	391.373	4.91373	Dengue	QC	NaN	NaN	NaN	36.582	0.210271
Dengue / QC	_C[Carbamidomethyl (C)]EAC[Carbamidomethyl (C)]PPGYSGPTHQGVGLAFAK_	G3XAP6;P49747	1.45127	1.45127	8.16925e-11	3.66775e-10	40	G3XAP6;P49747	COMP	Cartilage oligomeric matrix protein	G3XAP6_HUMAN;COMP_HUMAN	1	173.449	2.73449	Dengue	QC	NaN	NaN	NaN	31.1331	0.216826
Dengue / QC	_N[HexN]YAEAK[Hex(2)]DVFLGM[Oxidation (M)]FLYEYAR_	P02768	0.518013	0.518013	8.17737e-11	3.6686e-10	28	P02768	ALB	Serum albumin	ALBU_HUMAN	1	43.1982	1.43198	Dengue	QC	NaN	NaN	NaN	13.2367	0.296219
Dengue / QC	_FKTGTTLKYTC[Carbamidomethyl (C)]LPGYVR_	P04003	1.55379	1.55379	8.48458e-11	3.80063e-10	126	P04003	C4BPA	C4b-binding protein alpha chain	C4BPA_HUMAN	1	193.587	2.93587	Dengue	QC	NaN	NaN	NaN	96.8504	0.195306
Dengue / QC	_IPLYYPNAGLTR_	P08519	1.475	1.475	8.86724e-11	3.95998e-10	78	P08519	LPA	Apolipoprotein(a)	APOA_HUMAN	1	177.983	2.77983	Dengue	QC	NaN	NaN	NaN	59.6073	0.196582
Dengue / QC	_LWLEGNPWDC[Carbamidomethyl (C)]GC[Carbamidomethyl (C)]PLK_	P35858;P35858-2	0.479025	0.479025	8.99788e-11	4.01528e-10	134	P35858;P35858-2	IGFALS	Insulin-like growth factor-binding protein complex acid labile subunit;Isoform 2 of Insulin-like growth factor-binding protein complex acid labile subunit	ALS_HUMAN	1	39.3801	1.3938	Dengue	QC	NaN	NaN	NaN	111.771	0.0749641
Dengue / QC	_LSPIYNLVPVK_	P02748	-0.624259	0.624259	9.79866e-11	4.32995e-10	152	P02748	C9	Complement component C9	CO9_HUMAN	1	-35.1247	0.648753	Dengue	QC	NaN	NaN	NaN	88.8934	0.0817195
Dengue / QC	_TPFVTHPGYDTGNGIQLPGTSGQQPSVGQQMIFEEHGFR_	P02751;P02751-15;P02751-3;P02751-7	0.753499	0.753499	9.87909e-11	4.35894e-10	94	P02751;P02751-15;P02751-3;P02751-7	FN1	Fibronectin;Isoform 15 of Fibronectin;Isoform 3 of Fibronectin;Isoform 7 of Fibronectin	FINC_HUMAN	1	68.5877	1.68588	Dengue	QC	NaN	NaN	NaN	87.4526	0.104795
Dengue / QC	_AQVSPTASDMLHMR_	Q6UXB8;Q6UXB8-2	1.00969	1.00969	9.99772e-11	4.40798e-10	50	Q6UXB8;Q6UXB8-2	PI16	Peptidase inhibitor 16;Isoform 2 of Peptidase inhibitor 16	PI16_HUMAN	1	101.348	2.01348	Dengue	QC	NaN	NaN	NaN	38.6703	0.122558
Dengue / QC	_DNENVVNEYSSELEK_	P02675	2.26059	2.26059	1.01079e-10	4.45323e-10	128	P02675	FGB	Fibrinogen beta chain	FIBB_HUMAN	1	379.186	4.79186	Dengue	QC	NaN	NaN	NaN	101.403	0.332142
Dengue / QC	_QSSGENC[Carbamidomethyl (C)]DVVVNTLGK_	P01833	1.54641	1.54641	1.02713e-10	4.51847e-10	98	P01833	PIGR	Polymeric immunoglobulin receptor	PIGR_HUMAN	1	192.089	2.92089	Dengue	QC	NaN	NaN	NaN	72.0001	0.217973
Dengue / QC	_GGMRKFIC[Carbamidomethyl (C)]PLTGLWPINTLK_	P02749	1.50098	1.50098	1.0291e-10	4.52374e-10	154	P02749	APOH	Beta-2-glycoprotein 1	APOH_HUMAN	1	183.035	2.83035	Dengue	QC	NaN	NaN	NaN	134.84	0.175729
Dengue / QC	_TLAFPLTIR_	A0A0U1RQQ4;Q9UNN8	0.946341	0.946341	1.03094e-10	4.52843e-10	60	A0A0U1RQQ4;Q9UNN8	PROCR	Endothelial protein C receptor (Fragment);Endothelial protein C receptor	A0A0U1RQQ4_HUMAN;EPCR_HUMAN	1	92.698	1.92698	Dengue	QC	NaN	NaN	NaN	40.4131	0.109397
Dengue / QC	_WLTFSLGK_	P11226	1.63227	1.63227	1.03625e-10	4.54839e-10	26	P11226	MBL2	Mannose-binding protein C	MBL2_HUMAN	1	210	3.1	Dengue	QC	NaN	NaN	NaN	21.115	0.188987
Dengue / QC	_GLIDEVNQDFTNR_	P02671	2.03875	2.03875	1.04998e-10	4.60178e-10	50	P02671	FGA	Fibrinogen alpha chain	FIBA_HUMAN	1	310.889	4.10889	Dengue	QC	NaN	NaN	NaN	34.5829	0.207342
Dengue / QC	_C[Carbamidomethyl (C)]QIAGWGHLDENVSGYSSSLR_	Q04756	0.569668	0.569668	1.0813e-10	4.72144e-10	94	Q04756	HGFAC	Hepatocyte growth factor activator	HGFA_HUMAN	1	48.4182	1.48418	Dengue	QC	NaN	NaN	NaN	75.461	0.0812133
Dengue / QC	_FGMHFC[Carbamidomethyl (C)]GGTLISPEWVLTAAHC[Carbamidomethyl (C)]LEK_	P00747	0.601039	0.601039	1.21784e-10	5.28627e-10	162	P00747	PLG	Plasminogen	PLMN_HUMAN	1	51.6808	1.51681	Dengue	QC	NaN	NaN	NaN	91.6175	0.0895636
Dengue / QC	_RITEVWGIPSPIDTVFTR_	Q92954-3	0.901396	0.901396	1.26709e-10	5.48388e-10	126	Q92954-3	PRG4	Isoform C of Proteoglycan 4	PRG4_HUMAN	1	86.7873	1.86787	Dengue	QC	NaN	NaN	NaN	73.8735	0.120772
Dengue / QC	_SSVAAMHWMDGSVVTR_	P22891;P22891-2	0.80622	0.80622	1.27697e-10	5.5226e-10	68	P22891;P22891-2	PROZ	Vitamin K-dependent protein Z;Isoform 2 of Vitamin K-dependent protein Z	PROZ_HUMAN	1	74.8624	1.74862	Dengue	QC	NaN	NaN	NaN	40.5365	0.109544
Dengue / QC	_HTASAWLM[Oxidation (M)]SAPNSGPHNR_	Q96PD5	0.471897	0.471897	1.31732e-10	5.68455e-10	34	Q96PD5	PGLYRP2	N-acetylmuramoyl-L-alanine amidase	PGRP2_HUMAN	1	38.6932	1.38693	Dengue	QC	NaN	NaN	NaN	13.1367	0.381179
Dengue / QC	_MVETTAYALLTSLNLKDINYVNPVIK_	P01031	0.760441	0.760441	1.36491e-10	5.8684e-10	64	P01031	C5	Complement C5	CO5_HUMAN	1	69.4008	1.69401	Dengue	QC	NaN	NaN	NaN	34.0801	0.14604
Dengue / QC	_QGFGNVATNTDGKNYC[Carbamidomethyl (C)]GLPGEYWLGNDKISQLTR_	P02675	1.99694	1.99694	1.43157e-10	6.14155e-10	40	P02675	FGB	Fibrinogen beta chain	FIBB_HUMAN	1	299.152	3.99152	Dengue	QC	NaN	NaN	NaN	32.7663	0.20415
Dengue / QC	_NTDEDKWGDAC[Carbamidomethyl (C)]DNC[Carbamidomethyl (C)]R_	G3XAP6;P49747	1.67725	1.67725	1.43316e-10	6.1439e-10	66	G3XAP6;P49747	COMP	Cartilage oligomeric matrix protein	G3XAP6_HUMAN;COMP_HUMAN	1	219.818	3.19818	Dengue	QC	NaN	NaN	NaN	54.875	0.234913
Dengue / QC	_RIPLYYPNAGLTR_	P08519	1.99969	1.99969	1.44949e-10	6.20486e-10	100	P08519	LPA	Apolipoprotein(a)	APOA_HUMAN	1	299.914	3.99914	Dengue	QC	NaN	NaN	NaN	66.0611	0.258815
Dengue / QC	_DATC[Carbamidomethyl (C)]NC[Carbamidomethyl (C)]DYNC[Carbamidomethyl (C)]QHYMEC[Carbamidomethyl (C)]C[Carbamidomethyl (C)]PDFKR_	Q92954-3	1.58197	1.58197	1.46478e-10	6.26121e-10	38	Q92954-3	PRG4	Isoform C of Proteoglycan 4	PRG4_HUMAN	1	199.378	2.99378	Dengue	QC	NaN	NaN	NaN	33.2623	0.183682
Dengue / QC	_LPLVPALDGC[Carbamidomethyl (C)]LR_	I3L145;P04278	1.76618	1.76618	1.49702e-10	6.38048e-10	28	I3L145;P04278	SHBG	Sex hormone-binding globulin	I3L145_HUMAN;SHBG_HUMAN	1	240.153	3.40153	Dengue	QC	NaN	NaN	NaN	17.8269	0.247291
Dengue / QC	_VDVQAGAC[Carbamidomethyl (C)]EGKLELSVDGAK_	P0C0L5	1.08892	1.08892	1.51343e-10	6.44575e-10	132	P0C0L5	C4B	Complement C4-B	CO4B_HUMAN	1	112.714	2.12714	Dengue	QC	NaN	NaN	NaN	125.879	0.141226
Dengue / QC	_EWFWDLATGTMKER_	P02790	0.681298	0.681298	1.53552e-10	6.53513e-10	122	P02790	HPX	Hemopexin	HEMO_HUMAN	1	60.3581	1.60358	Dengue	QC	NaN	NaN	NaN	46.5618	0.082326
Dengue / QC	_DNC[Carbamidomethyl (C)]C[Carbamidomethyl (C)]ILDER_	P02679;P02679-2	2.94904	2.94904	1.55806e-10	6.61669e-10	142	P02679;P02679-2	FGG	Fibrinogen gamma chain;Isoform Gamma-A of Fibrinogen gamma chain	FIBG_HUMAN	1	672.233	7.72233	Dengue	QC	NaN	NaN	NaN	112.145	0.381682
Dengue / QC	_C[Carbamidomethyl (C)]QFFTYSLLPEDC[Carbamidomethyl (C)]KEEK_	H0YAC1;P03952	0.704016	0.704016	1.56584e-10	6.64495e-10	146	H0YAC1;P03952	KLKB1	Plasma kallikrein (Fragment);Plasma kallikrein	H0YAC1_HUMAN;KLKB1_HUMAN	1	62.9033	1.62903	Dengue	QC	NaN	NaN	NaN	107.36	0.0838946
Dengue / QC	_FPKAEFAEVSKLVTDLTK_	P02768	1.43271	1.43271	1.6269e-10	6.88422e-10	154	P02768	ALB	Serum albumin	ALBU_HUMAN	1	169.954	2.69954	Dengue	QC	NaN	NaN	NaN	128.884	0.187217
Dengue / QC	_ITFELVYEELLK_	Q14624	0.704438	0.704438	1.69211e-10	7.14472e-10	150	Q14624	ITIH4	Inter-alpha-trypsin inhibitor heavy chain H4	ITIH4_HUMAN	1	62.951	1.62951	Dengue	QC	NaN	NaN	NaN	87.0101	0.129342
Dengue / QC	_RYTIAALLSPYSYSTTAVVTNPK_	P02766	0.454515	0.454515	1.70005e-10	7.1731e-10	158	P02766	TTR	Transthyretin	TTHY_HUMAN	1	37.0322	1.37032	Dengue	QC	NaN	NaN	NaN	129.166	0.0759063
Dengue / QC	_HYYIAAEEIIWNYAPSGIDIFTK_	P00450	1.4785	1.4785	1.75173e-10	7.37002e-10	42	P00450	CP	Ceruloplasmin	CERU_HUMAN	1	178.66	2.7866	Dengue	QC	NaN	NaN	NaN	29.8731	0.148518
Dengue / QC	_ELSHLPSLYDYSAYR_	P10643	0.846734	0.846734	1.85383e-10	7.77737e-10	30	P10643	C7	Complement component C7	CO7_HUMAN	1	79.8425	1.79842	Dengue	QC	NaN	NaN	NaN	23.9593	0.146034
Dengue / QC	_YSQKFQGR_	A0A0C4DH29	2.04952	2.04952	1.87304e-10	7.85236e-10	44	A0A0C4DH29	IGHV1-3	Immunoglobulin heavy variable 1-3	HV103_HUMAN	1	313.969	4.13969	Dengue	QC	NaN	NaN	NaN	39.3565	0.208549
Dengue / QC	_VSNKALPAPIEK_	P01857	2.77655	2.77655	1.89108e-10	7.92233e-10	166	P01857	IGHG1	Immunoglobulin heavy constant gamma 1	IGHG1_HUMAN	1	585.21	6.8521	Dengue	QC	NaN	NaN	NaN	138.639	0.369548
Dengue / QC	_IDQTVEELR_	P06727	1.72354	1.72354	1.9324e-10	8.08971e-10	66	P06727	APOA4	Apolipoprotein A-IV	APOA4_HUMAN	1	230.245	3.30245	Dengue	QC	NaN	NaN	NaN	51.2217	0.175382
Dengue / QC	_HQSAC[Carbamidomethyl (C)]KDSDWPFC[Carbamidomethyl (C)]SDEDWNYKC[Carbamidomethyl (C)]PSGC[Carbamidomethyl (C)]R_	P02671	2.10829	2.10829	1.93795e-10	8.10715e-10	40	P02671	FGA	Fibrinogen alpha chain	FIBA_HUMAN	1	331.181	4.31181	Dengue	QC	NaN	NaN	NaN	33.3549	0.231489
Dengue / QC	_YHFEALADTGISSEFYDNANDLLSK_	P07357	0.907504	0.907504	1.95262e-10	8.16274e-10	120	P07357	C8A	Complement component C8 alpha chain	CO8A_HUMAN	1	87.5797	1.8758	Dengue	QC	NaN	NaN	NaN	78.6305	0.116357
Dengue / QC	_GTVIDVTDFVNWASSINDAPVLISQK_	P02748	0.683513	0.683513	1.98017e-10	8.26615e-10	114	P02748	C9	Complement component C9	CO9_HUMAN	1	60.6046	1.60605	Dengue	QC	NaN	NaN	NaN	103.499	0.104115
Dengue / QC	_PGQPPKLLIYWASTR_	P06312	0.292828	0.292828	2.00784e-10	8.37573e-10	98	P06312	IGKV4-1	Immunoglobulin kappa variable 4-1	KV401_HUMAN	1	22.504	1.22504	Dengue	QC	NaN	NaN	NaN	42.4458	0.241272
Dengue / QC	_YKPFSQVPTGEVFYYSC[Carbamidomethyl (C)]EYNFVSPSK_	Q03591	0.730575	0.730575	2.03983e-10	8.50313e-10	112	Q03591	CFHR1	Complement factor H-related protein 1	FHR1_HUMAN	1	65.93	1.6593	Dengue	QC	NaN	NaN	NaN	98.8566	0.10136
Dengue / QC	_EDYLDVYVFGVGPLVNQVNINALASK_	B4E1Z4	1.23949	1.23949	2.20699e-10	9.14813e-10	136	B4E1Z4	NaN	cDNA FLJ55673, highly similar to Complement factor B (EC 3.4.21.47)	B4E1Z4_HUMAN	1	136.114	2.36114	Dengue	QC	NaN	NaN	NaN	42.4194	0.121931
Dengue / QC	_GLFIIDGK_	P32119	0.418801	0.418801	2.20885e-10	9.14942e-10	112	P32119	PRDX2	Peroxiredoxin-2	PRDX2_HUMAN	1	33.6816	1.33682	Dengue	QC	NaN	NaN	NaN	106.92	0.0617931
Dengue / QC	_TPAYYPNAGLIK_	P08519	1.30128	1.30128	2.24421e-10	9.27629e-10	134	P08519	LPA	Apolipoprotein(a)	APOA_HUMAN	1	146.447	2.46447	Dengue	QC	NaN	NaN	NaN	109.43	0.196389
Dengue / QC	_TFYEPGEEITYSC[Carbamidomethyl (C)]K_	P02749	0.616217	0.616217	2.28214e-10	9.42645e-10	72	P02749	APOH	Beta-2-glycoprotein 1	APOH_HUMAN	1	53.285	1.53285	Dengue	QC	NaN	NaN	NaN	62.4139	0.0953606
Dengue / QC	_EC[Carbamidomethyl (C)]VGFEAVQEVPVGLVQPASATLYDYYNPER_	P0C0L5	0.598063	0.598063	2.29377e-10	9.46785e-10	164	P0C0L5	C4B	Complement C4-B	CO4B_HUMAN	1	51.3683	1.51368	Dengue	QC	NaN	NaN	NaN	139.415	0.0977044
Dengue / QC	_WSHPPSC[Carbamidomethyl (C)]IKTDC[Carbamidomethyl (C)]LSLPSFENAIPMGEK_	P08603	1.43536	1.43536	2.344e-10	9.66838e-10	106	P08603	CFH	Complement factor H	CFAH_HUMAN	1	170.449	2.70449	Dengue	QC	NaN	NaN	NaN	94.1752	0.186899
Dengue / QC	_NGFKSHALQLNNR_	P0C0L5	3.00899	3.00899	2.41526e-10	9.94836e-10	50	P0C0L5	C4B	Complement C4-B	CO4B_HUMAN	1	705.002	8.05002	Dengue	QC	NaN	NaN	NaN	38.9195	0.250815
Dengue / QC	_PGSAPTTVIYEDNQRPSGVPDR_	P01721	1.16703	1.16703	2.42637e-10	9.98714e-10	42	P01721	IGLV6-57	Immunoglobulin lambda variable 6-57	LV657_HUMAN	1	124.548	2.24548	Dengue	QC	NaN	NaN	NaN	33.7261	0.13986
Dengue / QC	_EGIVEYPRC[Carbamidomethyl (C)]E_	Q92496;Q92496-2	1.17737	1.17737	2.43152e-10	1.00013e-09	100	Q92496;Q92496-2	CFHR4	Complement factor H-related protein 4;Isoform 2 of Complement factor H-related protein 4	FHR4_HUMAN	1	126.164	2.26164	Dengue	QC	NaN	NaN	NaN	82.6642	0.156697
Dengue / QC	_VETNM[Oxidation (M)]AFSPFSIASLLTQVLLGAGENTK_	P05155;P05155-3	0.990324	0.990324	2.46533e-10	1.01192e-09	68	P05155;P05155-3	SERPING1	Plasma protease C1 inhibitor;Isoform 3 of Plasma protease C1 inhibitor	IC1_HUMAN	1	98.6631	1.98663	Dengue	QC	NaN	NaN	NaN	36.7607	0.236957
Dengue / QC	_DKGQAGLQR_	P0C0L5	1.42409	1.42409	2.53096e-10	1.03741e-09	88	P0C0L5	C4B	Complement C4-B	CO4B_HUMAN	1	168.345	2.68345	Dengue	QC	NaN	NaN	NaN	68.4053	0.174356
Dengue / QC	_KNPREDYLDVYVFGVGPLVNQVNINALASK_	B4E1Z4	0.764304	0.764304	2.54569e-10	1.04239e-09	136	B4E1Z4	NaN	cDNA FLJ55673, highly similar to Complement factor B (EC 3.4.21.47)	B4E1Z4_HUMAN	1	69.855	1.69855	Dengue	QC	NaN	NaN	NaN	107.935	0.101929
Dengue / QC	_LKHELTDEELQSLFTNFANVVDK_	P43652	0.892486	0.892486	2.63812e-10	1.07833e-09	108	P43652	AFM	Afamin	AFAM_HUMAN	1	85.6372	1.85637	Dengue	QC	NaN	NaN	NaN	90.6156	0.141498
Dengue / QC	_SQPM[Oxidation (M)]GLWR_	P25311	1.55798	1.55798	2.68067e-10	1.09388e-09	48	P25311	AZGP1	Zinc-alpha-2-glycoprotein	ZA2G_HUMAN	1	194.44	2.9444	Dengue	QC	NaN	NaN	NaN	41.1584	0.181096
Dengue / QC	_E[Acetyl (Protein N-term)]EEIAALVIDNGSGMC[Carbamidomethyl (C)]K_	P63261	1.73458	1.73458	2.68174e-10	1.09388e-09	64	P63261	ACTG1	Actin, cytoplasmic 2	ACTG_HUMAN	1	232.782	3.32782	Dengue	QC	NaN	NaN	NaN	47.3802	0.237593
Dengue / QC	_MGPTELLIEMEDWKGDKVK_	P02675	4.12664	4.12664	2.74459e-10	1.11875e-09	46	P02675	FGB	Fibrinogen beta chain	FIBB_HUMAN	1	1646.8	17.468	Dengue	QC	NaN	NaN	NaN	29.2741	0.348094
Dengue / QC	_YGIDWASGR_	O75636	-0.611452	0.611452	2.76629e-10	1.12681e-09	164	O75636	FCN3	Ficolin-3	FCN3_HUMAN	1	-34.5462	0.654538	Dengue	QC	NaN	NaN	NaN	61.8375	0.0836777
Dengue / QC	_EGKEYGVVLAPDGSTVAVEPLLAGLEAGLQGR_	Q96PD5	0.845506	0.845506	2.84834e-10	1.15943e-09	172	Q96PD5	PGLYRP2	N-acetylmuramoyl-L-alanine amidase	PGRP2_HUMAN	1	79.6895	1.7969	Dengue	QC	NaN	NaN	NaN	97.4829	0.11321
Dengue / QC	_LDPQGAVR_	Q9Y6R7	1.19067	1.19067	2.92375e-10	1.18848e-09	44	Q9Y6R7	FCGBP	IgGFc-binding protein	FCGBP_HUMAN	1	128.259	2.28259	Dengue	QC	NaN	NaN	NaN	34.5146	0.208378
Dengue / QC	_LATALQKLEEAEKAADESER_	A0A087WWU8;P06753-2	1.29498	1.29498	2.9461e-10	1.19591e-09	24	A0A087WWU8;P06753-2	TPM3	Tropomyosin alpha-3 chain;Isoform 2 of Tropomyosin alpha-3 chain	A0A087WWU8_HUMAN;TPM3_HUMAN	1	145.374	2.45374	Dengue	QC	NaN	NaN	NaN	17.7757	0.129246
Dengue / QC	_QN[HexN]C[Carbamidomethyl (C)]ELFEQLGEYKFQNALLVR_	P02768	-0.840747	0.840747	3.04589e-10	1.23217e-09	74	P02768	ALB	Serum albumin	ALBU_HUMAN	1	-44.1646	0.558354	Dengue	QC	NaN	NaN	NaN	31.593	0.599185
Dengue / QC	_ASSIIDELFQDRFFTR_	P10909;P10909-2;P10909-4;P10909-5	0.81517	0.81517	3.1313e-10	1.26499e-09	156	P10909;P10909-2;P10909-4;P10909-5	CLU	Clusterin;Isoform 2 of Clusterin;Isoform 4 of Clusterin;Isoform 5 of Clusterin	CLUS_HUMAN	1	75.9505	1.75951	Dengue	QC	NaN	NaN	NaN	91.1115	0.127165
Dengue / QC	_GDDITMVLILPKPEK_	P01008	0.802274	0.802274	3.14651e-10	1.26939e-09	70	P01008	SERPINC1	Antithrombin-III	ANT3_HUMAN	1	74.3847	1.74385	Dengue	QC	NaN	NaN	NaN	52.828	0.137569
Dengue / QC	_NIPGDFEC[Carbamidomethyl (C)]EC[Carbamidomethyl (C)]PEGYRYNLK_	P07225	2.13077	2.13077	3.20848e-10	1.29262e-09	52	P07225	PROS1	Vitamin K-dependent protein S	PROS_HUMAN	1	337.95	4.3795	Dengue	QC	NaN	NaN	NaN	42.7818	0.236089
Dengue / QC	_LKAKLPDATPTELAK_	D6RF35	1.27412	1.27412	3.26518e-10	1.31366e-09	64	D6RF35	GC	Vitamin D-binding protein	D6RF35_HUMAN	1	141.852	2.41852	Dengue	QC	NaN	NaN	NaN	51.857	0.155274
Dengue / QC	_SC[Carbamidomethyl (C)]DIPVFM[Oxidation (M)]NAR_	P08603	0.971627	0.971627	3.38143e-10	1.35857e-09	114	P08603	CFH	Complement factor H	CFAH_HUMAN	1	96.1051	1.96105	Dengue	QC	NaN	NaN	NaN	106.901	0.1417
Dengue / QC	_NTVLVLNTQSLVFVQTDKPMYKPGQTVR_	P20742	3.18907	3.18907	3.39034e-10	1.36122e-09	42	P20742	PZP	Pregnancy zone protein	PZP_HUMAN	1	812.023	9.12023	Dengue	QC	NaN	NaN	NaN	28.8691	0.321038
Dengue / QC	_IGEKWDR_	P02751;P02751-15;P02751-3;P02751-7	1.49894	1.49894	3.41381e-10	1.36971e-09	62	P02751;P02751-15;P02751-3;P02751-7	FN1	Fibronectin;Isoform 15 of Fibronectin;Isoform 3 of Fibronectin;Isoform 7 of Fibronectin	FINC_HUMAN	1	182.635	2.82635	Dengue	QC	NaN	NaN	NaN	57.6028	0.1735
Dengue / QC	_FC[Carbamidomethyl (C)]EAEFSVK_	Q16610	1.19949	1.19949	3.42656e-10	1.37389e-09	62	Q16610	ECM1	Extracellular matrix protein 1	ECM1_HUMAN	1	129.658	2.29658	Dengue	QC	NaN	NaN	NaN	48.2903	0.170034
Dengue / QC	_EIEEVLTPEMLMR_	P29622	0.510987	0.510987	3.44851e-10	1.38081e-09	120	P29622	SERPINA4	Kallistatin	KAIN_HUMAN	1	42.5025	1.42502	Dengue	QC	NaN	NaN	NaN	66.2611	0.0832085
Dengue / QC	_KQC[Carbamidomethyl (C)]SKEDGGGWWYNR_	P02675	1.93508	1.93508	3.44712e-10	1.38081e-09	34	P02675	FGB	Fibrinogen beta chain	FIBB_HUMAN	1	282.401	3.82401	Dengue	QC	NaN	NaN	NaN	27.7169	0.181746
Dengue / QC	_MADEAGSEADHEGTHSTKR_	P02671	2.06433	2.06433	3.51979e-10	1.40648e-09	168	P02671	FGA	Fibrinogen alpha chain	FIBA_HUMAN	1	318.241	4.18241	Dengue	QC	NaN	NaN	NaN	121.124	0.265943
Dengue / QC	_ATAVVDGAFK_	P32119	0.975732	0.975732	3.54182e-10	1.41145e-09	44	P32119	PRDX2	Peroxiredoxin-2	PRDX2_HUMAN	1	96.6639	1.96664	Dengue	QC	NaN	NaN	NaN	22.5255	0.11883
Dengue / QC	_A[Acetyl (Protein N-term)]GLNSLEAVKR_	P67936	0.859518	0.859518	3.56265e-10	1.41879e-09	50	P67936	TPM4	Tropomyosin alpha-4 chain	TPM4_HUMAN	1	81.4433	1.81443	Dengue	QC	NaN	NaN	NaN	41.8558	0.121233
Dengue / QC	_DGEKVSVLC[Carbamidomethyl (C)]QENYLIQEGEEITC[Carbamidomethyl (C)]KDGR_	P08603	1.11574	1.11574	3.64327e-10	1.44796e-09	96	P08603	CFH	Complement factor H	CFAH_HUMAN	1	116.706	2.16706	Dengue	QC	NaN	NaN	NaN	85.2563	0.129096
Dengue / QC	_C[Carbamidomethyl (C)]LAYDFYPGKIDVHWTR_	P25311	1.85323	1.85323	3.64757e-10	1.44869e-09	116	P25311	AZGP1	Zinc-alpha-2-glycoprotein	ZA2G_HUMAN	1	261.308	3.61308	Dengue	QC	NaN	NaN	NaN	71.6576	0.192622
Dengue / QC	_LWAYLTIQELLAK_	P19827	1.01952	1.01952	3.71458e-10	1.47232e-09	114	P19827	ITIH1	Inter-alpha-trypsin inhibitor heavy chain H1	ITIH1_HUMAN	1	102.724	2.02724	Dengue	QC	NaN	NaN	NaN	80.1027	0.159778
Dengue / QC	_DLATVYVDVLKDSGR_	P02647	0.333443	0.333443	3.7315e-10	1.47804e-09	162	P02647	APOA1	Apolipoprotein A-I	APOA1_HUMAN	1	26.0017	1.26002	Dengue	QC	NaN	NaN	NaN	91.7591	0.0843886
Dengue / QC	_MKFAC[Carbamidomethyl (C)]YYPR_	P0C0L5	1.76301	1.76301	3.84646e-10	1.5205e-09	62	P0C0L5	C4B	Complement C4-B	CO4B_HUMAN	1	239.407	3.39407	Dengue	QC	NaN	NaN	NaN	47.7813	0.234992
Dengue / QC	_NAIGGKFPLYNLGFGNNLNYNFLENMALENHGFARR_	Q06033;Q06033-2	2.22933	2.22933	3.85183e-10	1.5216e-09	40	Q06033;Q06033-2	ITIH3	Inter-alpha-trypsin inhibitor heavy chain H3;Isoform 2 of Inter-alpha-trypsin inhibitor heavy chain H3	ITIH3_HUMAN	1	368.915	4.68915	Dengue	QC	NaN	NaN	NaN	31.9308	0.227859
Dengue / QC	_WYLFGMGNEVDVHAAFFHGQALTNK_	P00450	1.52142	1.52142	3.87383e-10	1.52824e-09	28	P00450	CP	Ceruloplasmin	CERU_HUMAN	1	187.073	2.87073	Dengue	QC	NaN	NaN	NaN	17.4844	0.104192
Dengue / QC	_RLDYQEGPPGVEISC[Carbamidomethyl (C)]WSVEL_	Q14624	0.869351	0.869351	3.88139e-10	1.52972e-09	176	Q14624	ITIH4	Inter-alpha-trypsin inhibitor heavy chain H4	ITIH4_HUMAN	1	82.6841	1.82684	Dengue	QC	NaN	NaN	NaN	83.4722	0.111897
Dengue / QC	_KLWAYLTINQLLAER_	P19823	0.677398	0.677398	3.8916e-10	1.53217e-09	156	P19823	ITIH2	Inter-alpha-trypsin inhibitor heavy chain H2	ITIH2_HUMAN	1	59.9253	1.59925	Dengue	QC	NaN	NaN	NaN	118.805	0.108112
Dengue / QC	_C[Carbamidomethyl (C)]NLLAEKQYGFC[Carbamidomethyl (C)]K_	P02765	1.76954	1.76954	4.06931e-10	1.6e-09	148	P02765	AHSG	Alpha-2-HS-glycoprotein	FETUA_HUMAN	1	240.946	3.40946	Dengue	QC	NaN	NaN	NaN	117.708	0.233602
Dengue / QC	_DYNLNDILLQLGIEEAFTSK_	P01011	1.4429	1.4429	4.33049e-10	1.69476e-09	142	P01011	SERPINA3	Alpha-1-antichymotrypsin	AACT_HUMAN	1	171.866	2.71866	Dengue	QC	NaN	NaN	NaN	61.4732	0.173489
Dengue / QC	_GSFAC[Carbamidomethyl (C)]QC[Carbamidomethyl (C)]PPGYQK_	Q12805;Q12805-2;Q12805-4	1.20372	1.20372	4.38587e-10	1.71302e-09	50	Q12805;Q12805-2;Q12805-4	EFEMP1	EGF-containing fibulin-like extracellular matrix protein 1;Isoform 2 of EGF-containing fibulin-like extracellular matrix protein 1;Isoform 4 of EGF-containing fibulin-like extracellular matrix protein 1	FBLN3_HUMAN	1	130.333	2.30333	Dengue	QC	NaN	NaN	NaN	43.6511	0.165043
Dengue / QC	_IEGNLIFDPNNYLPKESMLK_	P04114	1.15426	1.15426	4.48437e-10	1.74686e-09	62	P04114	APOB	Apolipoprotein B-100	APOB_HUMAN	1	122.569	2.22569	Dengue	QC	NaN	NaN	NaN	44.6226	0.117147
Dengue / QC	_ETTFNSLLC[Carbamidomethyl (C)]PSGGEVSEELSLK_	P01023	0.654459	0.654459	4.58517e-10	1.78258e-09	146	P01023	A2M	Alpha-2-macroglobulin	A2MG_HUMAN	1	57.4026	1.57403	Dengue	QC	NaN	NaN	NaN	136.896	0.10523
Dengue / QC	_VLNYVDWIK_	B4DPQ0	0.66828	0.66828	4.62179e-10	1.79563e-09	72	B4DPQ0	C1R	Complement C1r subcomponent	B4DPQ0_HUMAN	1	58.9178	1.58918	Dengue	QC	NaN	NaN	NaN	58.9318	0.0985847
Dengue / QC	_C[Carbamidomethyl (C)]HAGHLNGVYYQGGTYSK_	P02679;P02679-2	2.30902	2.30902	4.84476e-10	1.88102e-09	36	P02679;P02679-2	FGG	Fibrinogen gamma chain;Isoform Gamma-A of Fibrinogen gamma chain	FIBG_HUMAN	1	395.547	4.95547	Dengue	QC	NaN	NaN	NaN	30.871	0.208706
Dengue / QC	_KFPSGTFEQVSQLVKEVVSLTEAC[Carbamidomethyl (C)]C[Carbamidomethyl (C)]AEGADPDC[Carbamidomethyl (C)]YDTR_	P02774;P02774-3	4.59956	4.59956	4.9662e-10	1.92436e-09	42	P02774;P02774-3	GC	Vitamin D-binding protein;Isoform 3 of Vitamin D-binding protein	VTDB_HUMAN	1	2324.41	24.2441	Dengue	QC	NaN	NaN	NaN	32.7673	0.513696
Dengue / QC	_ALRDFALQNPSAVPR_	P35858;P35858-2	0.481759	0.481759	5.19321e-10	2.00572e-09	112	P35858;P35858-2	IGFALS	Insulin-like growth factor-binding protein complex acid labile subunit;Isoform 2 of Insulin-like growth factor-binding protein complex acid labile subunit	ALS_HUMAN	1	39.6445	1.39645	Dengue	QC	NaN	NaN	NaN	103.725	0.0648147
Dengue / QC	_IDWDDDKFYSTSLK_	A0A0C4DH43	0.893586	0.893586	5.30207e-10	2.04319e-09	62	A0A0C4DH43	IGHV2-70D	Immunoglobulin heavy variable 2-70D	HV70D_HUMAN	1	85.7789	1.85779	Dengue	QC	NaN	NaN	NaN	49.7746	0.108155
Dengue / QC	_SVPSDIFQIQATTIYANTINTFR_	Q12805;Q12805-2;Q12805-4	1.38318	1.38318	5.36191e-10	2.05738e-09	62	Q12805;Q12805-2;Q12805-4	EFEMP1	EGF-containing fibulin-like extracellular matrix protein 1;Isoform 2 of EGF-containing fibulin-like extracellular matrix protein 1;Isoform 4 of EGF-containing fibulin-like extracellular matrix protein 1	FBLN3_HUMAN	1	160.843	2.60843	Dengue	QC	NaN	NaN	NaN	39.1116	0.209785
Dengue / QC	_TDELPQLVTLPHPNLHGPEILDVPSTVQK_	P02751;P02751-15;P02751-3;P02751-7	1.13478	1.13478	5.46353e-10	2.09092e-09	46	P02751;P02751-15;P02751-3;P02751-7	FN1	Fibronectin;Isoform 15 of Fibronectin;Isoform 3 of Fibronectin;Isoform 7 of Fibronectin	FINC_HUMAN	1	119.585	2.19585	Dengue	QC	NaN	NaN	NaN	36.5714	0.124798
Dengue / QC	_TTPPMLDSDGSFFLYSKLTVDK_	P01859	0.52702	0.52702	5.47535e-10	2.09408e-09	80	P01859	IGHG2	Immunoglobulin heavy constant gamma 2	IGHG2_HUMAN	1	44.095	1.44095	Dengue	QC	NaN	NaN	NaN	60.7094	0.123278
Dengue / QC	_ASC[Carbamidomethyl (C)]KVPVK_	P02749	0.9127	0.9127	5.63318e-10	2.15025e-09	30	P02749	APOH	Beta-2-glycoprotein 1	APOH_HUMAN	1	88.2566	1.88257	Dengue	QC	NaN	NaN	NaN	22.4944	0.109741
Dengue / QC	_C[Carbamidomethyl (C)]LVNLIEK_	B4E1Z4	0.391234	0.391234	5.76635e-10	2.19824e-09	82	B4E1Z4	NaN	cDNA FLJ55673, highly similar to Complement factor B (EC 3.4.21.47)	B4E1Z4_HUMAN	1	31.1514	1.31151	Dengue	QC	NaN	NaN	NaN	68.5858	0.0696128
Dengue / QC	_AFQPFFVELTMPYSVIRGEAFTLKATVLNYLPK_	P01023	1.5892	1.5892	5.79581e-10	2.20661e-09	52	P01023	A2M	Alpha-2-macroglobulin	A2MG_HUMAN	1	200.882	3.00882	Dengue	QC	NaN	NaN	NaN	41.2884	0.174552
Dengue / QC	_GLESQTK_	P0C0L5	0.946222	0.946222	5.99838e-10	2.27784e-09	128	P0C0L5	C4B	Complement C4-B	CO4B_HUMAN	1	92.682	1.92682	Dengue	QC	NaN	NaN	NaN	90.3724	0.140805
Dengue / QC	_DSLDQLVGGVPVTLNAQTIDVNQETSDLDPSK_	P01031	0.455894	0.455894	6.12238e-10	2.32193e-09	118	P01031	C5	Complement C5	CO5_HUMAN	1	37.1633	1.37163	Dengue	QC	NaN	NaN	NaN	80.6909	0.0898112
Dengue / QC	_YRC[Carbamidomethyl (C)]HPGYKPTTDEPTTVIC[Carbamidomethyl (C)]QK_	P04003	2.39591	2.39591	6.95731e-10	2.62337e-09	80	P04003	C4BPA	C4b-binding protein alpha chain	C4BPA_HUMAN	1	426.308	5.26308	Dengue	QC	NaN	NaN	NaN	62.0416	0.306268
Dengue / QC	_VTSTLTIKESDWLGQSMFTC[Carbamidomethyl (C)]R_	P01871	0.0562777	0.0562777	7.11508e-10	2.676e-09	124	P01871	IGHM	Immunoglobulin heavy constant mu	IGHM_HUMAN	1	3.97796	1.03978	Dengue	QC	NaN	NaN	NaN	44.922	0.402258
Dengue / QC	_ANRPFLVFIREVPLNTIIFM[Oxidation (M)]GR_	P01008	1.25626	1.25626	7.18139e-10	2.69921e-09	62	P01008	SERPINC1	Antithrombin-III	ANT3_HUMAN	1	138.876	2.38876	Dengue	QC	NaN	NaN	NaN	45.2146	0.169322
Dengue / QC	_RRDGYLFQLLR_	P04196	0.868101	0.868101	7.25519e-10	2.72521e-09	82	P04196	HRG	Histidine-rich glycoprotein	HRG_HUMAN	1	82.5259	1.82526	Dengue	QC	NaN	NaN	NaN	73.5787	0.103536
Dengue / QC	_RQLTPYAQR_	P06727	0.679828	0.679828	7.31294e-10	2.73991e-09	40	P06727	APOA4	Apolipoprotein A-IV	APOA4_HUMAN	1	60.1949	1.60195	Dengue	QC	NaN	NaN	NaN	31.2015	0.0878624
Dengue / QC	_SIAYLQMNSLK_	A0A0A0MS15	-0.668146	0.668146	7.59939e-10	2.8418e-09	166	A0A0A0MS15	IGHV3-49	Immunoglobulin heavy variable 3-49	HV349_HUMAN	1	-37.0685	0.629315	Dengue	QC	NaN	NaN	NaN	75.5979	0.0899139
Dengue / QC	_VPGTSTSATLTGLTR_	P02751;P02751-15;P02751-3;P02751-7	0.44322	0.44322	7.72523e-10	2.8852e-09	114	P02751;P02751-15;P02751-3;P02751-7	FN1	Fibronectin;Isoform 15 of Fibronectin;Isoform 3 of Fibronectin;Isoform 7 of Fibronectin	FINC_HUMAN	1	35.9635	1.35964	Dengue	QC	NaN	NaN	NaN	76.4914	0.162962
Dengue / QC	_TVTINC[Carbamidomethyl (C)]PFKTENAQK_	P01833	2.90878	2.90878	7.8282e-10	2.91995e-09	22	P01833	PIGR	Polymeric immunoglobulin receptor	PIGR_HUMAN	1	650.983	7.50983	Dengue	QC	NaN	NaN	NaN	16.9075	0.236445
Dengue / QC	_NSITLTNLTPGTEYVVSIVALNGR_	P02751;P02751-15;P02751-3;P02751-7	1.41589	1.41589	7.99096e-10	2.97877e-09	64	P02751;P02751-15;P02751-3;P02751-7	FN1	Fibronectin;Isoform 15 of Fibronectin;Isoform 3 of Fibronectin;Isoform 7 of Fibronectin	FINC_HUMAN	1	166.823	2.66823	Dengue	QC	NaN	NaN	NaN	40.1277	0.199951
Dengue / QC	_FQVDNNNR_	P01023	-0.549493	0.549493	8.21752e-10	3.05858e-09	176	P01023	A2M	Alpha-2-macroglobulin	A2MG_HUMAN	1	-31.674	0.68326	Dengue	QC	NaN	NaN	NaN	101.886	0.0849448
Dengue / QC	_QNC[Carbamidomethyl (C)]ELFEQLGEYKFQNALLVRYTK_	P02768	2.8479	2.8479	8.22066e-10	3.05858e-09	28	P02768	ALB	Serum albumin	ALBU_HUMAN	1	619.954	7.19954	Dengue	QC	NaN	NaN	NaN	19.9173	0.201121
Dengue / QC	_YTLNKNSLKIEIPLPFGGK_	P04114	0.577024	0.577024	8.44549e-10	3.13431e-09	122	P04114	APOB	Apolipoprotein B-100	APOB_HUMAN	1	49.1769	1.49177	Dengue	QC	NaN	NaN	NaN	105.163	0.0944091
Dengue / QC	_LLIYSNNQR_	P01699	1.30792	1.30792	8.47381e-10	3.14284e-09	68	P01699	IGLV1-44	Immunoglobulin lambda variable 1-44	LV144_HUMAN	1	147.585	2.47585	Dengue	QC	NaN	NaN	NaN	54.2614	0.168257
Dengue / QC	_SSSYSKQFTSSTSYNRGDSTFESK_	P02671	1.41202	1.41202	8.526e-10	3.1602e-09	108	P02671	FGA	Fibrinogen alpha chain	FIBA_HUMAN	1	166.11	2.6611	Dengue	QC	NaN	NaN	NaN	62.1732	0.268764
Dengue / QC	_WERPFEVKDTEEEDFHVDQVTTVK_	P01009	1.14431	1.14431	8.84778e-10	3.27535e-09	78	P01009	SERPINA1	Alpha-1-antitrypsin	A1AT_HUMAN	1	121.04	2.2104	Dengue	QC	NaN	NaN	NaN	54.6013	0.137756
Dengue / QC	_SGIPIVTSPYQIHFTKTPK_	P01024	1.85674	1.85674	8.99808e-10	3.3268e-09	122	P01024	C3	Complement C3	CO3_HUMAN	1	262.188	3.62188	Dengue	QC	NaN	NaN	NaN	96.1546	0.234026
Dengue / QC	_YVMLPVADQDQC[Carbamidomethyl (C)]IRHYEGSTVPEKK_	P00738	3.60529	3.60529	9.39868e-10	3.46621e-09	72	P00738	HP	Haptoglobin	HPT_HUMAN	1	1117.03	12.1703	Dengue	QC	NaN	NaN	NaN	36.2237	0.412373
Dengue / QC	_EYC[Carbamidomethyl (C)]GVPGDGDEELLRFSN_	P02760	2.20269	2.20269	9.43758e-10	3.47837e-09	40	P02760	AMBP	Protein AMBP	AMBP_HUMAN	1	360.335	4.60335	Dengue	QC	NaN	NaN	NaN	33.3872	0.237556
Dengue / QC	_LISVDTEHSNIYLQNGPDRIGR_	P00450	0.732259	0.732259	9.85835e-10	3.62438e-09	108	P00450	CP	Ceruloplasmin	CERU_HUMAN	1	66.1238	1.66124	Dengue	QC	NaN	NaN	NaN	68.5653	0.0909424
Dengue / QC	_WEDPGKQLYNVEATSYALLALLQLKDFDFVPPVVR_	P01024	1.0513	1.0513	1.04286e-09	3.81972e-09	64	P01024	C3	Complement C3	CO3_HUMAN	1	107.239	2.07239	Dengue	QC	NaN	NaN	NaN	36.2249	0.200351
Dengue / QC	_YQKEEFC[Carbamidomethyl (C)]GLLSSPTGPLSSC[Carbamidomethyl (C)]HK_	Q9Y6R7	2.31498	2.31498	1.06186e-09	3.87966e-09	34	Q9Y6R7	FCGBP	IgGFc-binding protein	FCGBP_HUMAN	1	397.597	4.97597	Dengue	QC	NaN	NaN	NaN	29.1639	0.276212
Dengue / QC	_C[Carbamidomethyl (C)]TSTGWIPAPR_	P08603	0.250117	0.250117	1.06466e-09	3.88746e-09	168	P08603	CFH	Complement factor H	CFAH_HUMAN	1	18.9304	1.1893	Dengue	QC	NaN	NaN	NaN	79.0642	0.0984906
Dengue / QC	_TTSAKETQSIEK_	Q92954-3	3.57295	3.57295	1.0665e-09	3.89177e-09	28	Q92954-3	PRG4	Isoform C of Proteoglycan 4	PRG4_HUMAN	1	1090.05	11.9005	Dengue	QC	NaN	NaN	NaN	21.3593	0.265313
Dengue / QC	_GFQHLLHTLNLPGHGLETR_	P29622	0.674626	0.674626	1.07396e-09	3.91657e-09	126	P29622	SERPINA4	Kallistatin	KAIN_HUMAN	1	59.6183	1.59618	Dengue	QC	NaN	NaN	NaN	118.239	0.104149
Dengue / QC	_AQMDLSGR_	P00488	2.4032	2.4032	1.07945e-09	3.93416e-09	28	P00488	F13A1	Coagulation factor XIII A chain	F13A_HUMAN	1	428.976	5.28976	Dengue	QC	NaN	NaN	NaN	22.545	0.245998
Dengue / QC	_SLEVTFTPVIEDIGK_	P19320	0.812746	0.812746	1.0927e-09	3.97997e-09	44	P19320	VCAM1	Vascular cell adhesion protein 1	VCAM1_HUMAN	1	75.6552	1.75655	Dengue	QC	NaN	NaN	NaN	38.5677	0.148327
Dengue / QC	_AIGYATAADC[Carbamidomethyl (C)]GR_	Q9Y6R7	1.24922	1.24922	1.09578e-09	3.98873e-09	104	Q9Y6R7	FCGBP	IgGFc-binding protein	FCGBP_HUMAN	1	137.713	2.37713	Dengue	QC	NaN	NaN	NaN	81.4775	0.199348
Dengue / QC	_IIPFNRLTIGEGQQHHLGGAK_	P02679;P02679-2	1.66028	1.66028	1.14796e-09	4.16579e-09	26	P02679;P02679-2	FGG	Fibrinogen gamma chain;Isoform Gamma-A of Fibrinogen gamma chain	FIBG_HUMAN	1	216.079	3.16079	Dengue	QC	NaN	NaN	NaN	17.9319	0.113003
Dengue / QC	_FDEFFSEGC[Carbamidomethyl (C)]APGSKKDSSLC[Carbamidomethyl (C)]K_	P02787	2.01733	2.01733	1.15477e-09	4.18792e-09	40	P02787	TF	Serotransferrin	TRFE_HUMAN	1	304.834	4.04834	Dengue	QC	NaN	NaN	NaN	33.3415	0.220054
Dengue / QC	_VKEGMNIVEAMER_	P62937	0.641537	0.641537	1.15808e-09	4.19732e-09	66	P62937	PPIA	Peptidyl-prolyl cis-trans isomerase A	PPIA_HUMAN	1	55.999	1.55999	Dengue	QC	NaN	NaN	NaN	58.2685	0.0730886
Dengue / QC	_GISTSAASPAVGTVGMDMDEDDDFSKWNFYYSPQSSPDKK_	P04114	1.03104	1.03104	1.1593e-09	4.19918e-09	104	P04114	APOB	Apolipoprotein B-100	APOB_HUMAN	1	104.35	2.0435	Dengue	QC	NaN	NaN	NaN	58.1267	0.154006
Dengue / QC	_QEALELMNQNLDIYEQQVMTAAQK_	P43251;P43251-2;P43251-3;P43251-4	1.00333	1.00333	1.16035e-09	4.20037e-09	38	P43251;P43251-2;P43251-3;P43251-4	BTD	Biotinidase;Isoform 2 of Biotinidase;Isoform 3 of Biotinidase;Isoform 4 of Biotinidase	BTD_HUMAN	1	100.462	2.00462	Dengue	QC	NaN	NaN	NaN	19.5245	0.121555
Dengue / QC	_EPQVYTLPPSQEEM[Oxidation (M)]TK_	P01861	1.19008	1.19008	1.18971e-09	4.29873e-09	84	P01861	IGHG4	Immunoglobulin heavy constant gamma 4	IGHG4_HUMAN	1	128.165	2.28165	Dengue	QC	NaN	NaN	NaN	79.8302	0.179648
Dengue / QC	_LR[Hex(2)]T[HexN]SSFALN[HexN]LPTLPEVKFPEVDVLTK_	P04114	0.168518	0.168518	1.19249e-09	4.30348e-09	26	P04114	APOB	Apolipoprotein B-100	APOB_HUMAN	1	12.3903	1.1239	Dengue	QC	NaN	NaN	NaN	12.815	0.217482
Dengue / QC	_VNIPLVTNEEC[Carbamidomethyl (C)]QK_	H0YAC1;P03952	1.26456	1.26456	1.24136e-09	4.46618e-09	34	H0YAC1;P03952	KLKB1	Plasma kallikrein (Fragment);Plasma kallikrein	H0YAC1_HUMAN;KLKB1_HUMAN	1	140.254	2.40254	Dengue	QC	NaN	NaN	NaN	22.0312	0.13375
Dengue / QC	_TQVNTQAEQLR_	P06727	1.16251	1.16251	1.25633e-09	4.51727e-09	70	P06727	APOA4	Apolipoprotein A-IV	APOA4_HUMAN	1	123.847	2.23847	Dengue	QC	NaN	NaN	NaN	43.0341	0.19955
Dengue / QC	_LWAYLTIQQLLEQTVSASDADQQALR_	Q14624	0.995043	0.995043	1.26463e-09	4.54433e-09	68	Q14624	ITIH4	Inter-alpha-trypsin inhibitor heavy chain H4	ITIH4_HUMAN	1	99.3139	1.99314	Dengue	QC	NaN	NaN	NaN	25.622	0.12116
Dengue / QC	_GISSTTVTGR_	P08519	1.87629	1.87629	1.27157e-09	4.56648e-09	80	P08519	LPA	Apolipoprotein(a)	APOA_HUMAN	1	267.13	3.6713	Dengue	QC	NaN	NaN	NaN	66.5823	0.255463
Dengue / QC	_DGFDISGNPWIC[Carbamidomethyl (C)]DQNLSDLYR_	P02750	0.57613	0.57613	1.30158e-09	4.66571e-09	132	P02750	LRG1	Leucine-rich alpha-2-glycoprotein	A2GL_HUMAN	1	49.0844	1.49084	Dengue	QC	NaN	NaN	NaN	106.246	0.107161
Dengue / QC	_DTEEEDFHVDQATTVKVPMMK_	A0A024R6I7	0.735566	0.735566	1.32398e-09	4.73449e-09	114	A0A024R6I7	SERPINA1	Alpha-1-antitrypsin	A0A024R6I7_HUMAN	1	66.505	1.66505	Dengue	QC	NaN	NaN	NaN	104.412	0.0973422
Dengue / QC	_AT[HexNAc]KEQLKAVMDDFAAFVEK_	P02768	0.500558	0.500558	1.3272e-09	4.74311e-09	114	P02768	ALB	Serum albumin	ALBU_HUMAN	1	41.4761	1.41476	Dengue	QC	NaN	NaN	NaN	77.592	0.180726
Dengue / QC	_SMQGGLVGNDETVALTAFVTIALHHGLAVFQDEGAEPLK_	P0C0L5	1.01957	1.01957	1.33213e-09	4.75783e-09	74	P0C0L5	C4B	Complement C4-B	CO4B_HUMAN	1	102.731	2.02731	Dengue	QC	NaN	NaN	NaN	47.5879	0.138697
Dengue / QC	_GFYPSDIAVEWESSGQPENNYNTTPPMLDSDGSFFLYSK_	P01860	1.89832	1.89832	1.36594e-09	4.87268e-09	40	P01860	IGHG3	Immunoglobulin heavy constant gamma 3	IGHG3_HUMAN	1	272.778	3.72778	Dengue	QC	NaN	NaN	NaN	29.8608	0.246359
Dengue / QC	_THTC[Carbamidomethyl (C)]PPC[Carbamidomethyl (C)]PAPELLGGPSVFLFPPKPKDTLMISR_	P01857	2.66737	2.66737	1.45323e-09	5.15905e-09	72	P01857	IGHG1	Immunoglobulin heavy constant gamma 1	IGHG1_HUMAN	1	535.27	6.3527	Dengue	QC	NaN	NaN	NaN	59.6654	0.274364
Dengue / QC	_EATEAAKC[Carbamidomethyl (C)]NLLAEK_	P02765	1.23774	1.23774	1.45958e-09	5.17846e-09	136	P02765	AHSG	Alpha-2-HS-glycoprotein	FETUA_HUMAN	1	135.829	2.35829	Dengue	QC	NaN	NaN	NaN	115.512	0.175636
Dengue / QC	_LFGEVTSPLFPKPYPNNFETTTVITVPTGYR_	B4DPQ0	0.674627	0.674627	1.51968e-09	5.37874e-09	118	B4DPQ0	C1R	Complement C1r subcomponent	B4DPQ0_HUMAN	1	59.6184	1.59618	Dengue	QC	NaN	NaN	NaN	95.7889	0.0967324
Dengue / QC	_VQYEC[Carbamidomethyl (C)]ATGYYTAGGK_	P05160	0.223425	0.223425	1.55325e-09	5.49096e-09	118	P05160	F13B	Coagulation factor XIII B chain	F13B_HUMAN	1	16.7502	1.1675	Dengue	QC	NaN	NaN	NaN	86.9707	0.068013
Dengue / QC	_LPVSLSEGR_	Q9Y6R7	2.28294	2.28294	1.59191e-09	5.61414e-09	22	Q9Y6R7	FCGBP	IgGFc-binding protein	FCGBP_HUMAN	1	386.668	4.86668	Dengue	QC	NaN	NaN	NaN	13.9455	0.159427
Dengue / QC	_SLPMDHPDSSQHGPPFEGQSQVQPPPSQEATPLQQEK_	Q16610	1.80959	1.80959	1.6027e-09	5.6488e-09	64	Q16610	ECM1	Extracellular matrix protein 1	ECM1_HUMAN	1	250.543	3.50543	Dengue	QC	NaN	NaN	NaN	21.9344	0.164013
Dengue / QC	_AFWLDVSHNR_	P35858;P35858-2	0.91262	0.91262	1.62179e-09	5.70028e-09	42	P35858;P35858-2	IGFALS	Insulin-like growth factor-binding protein complex acid labile subunit;Isoform 2 of Insulin-like growth factor-binding protein complex acid labile subunit	ALS_HUMAN	1	88.2461	1.88246	Dengue	QC	NaN	NaN	NaN	23.3724	0.108201
Dengue / QC	_FLFDTKEEILMHLWR_	Q96KN2	1.37643	1.37643	1.62215e-09	5.70028e-09	36	Q96KN2	CNDP1	Beta-Ala-His dipeptidase	CNDP1_HUMAN	1	159.625	2.59625	Dengue	QC	NaN	NaN	NaN	29.7946	0.179135
Dengue / QC	_KKTDELPQLVTLPHPNLHGPEILDVPSTVQK_	P02751;P02751-15;P02751-3;P02751-7	0.638855	0.638855	1.63604e-09	5.74223e-09	138	P02751;P02751-15;P02751-3;P02751-7	FN1	Fibronectin;Isoform 15 of Fibronectin;Isoform 3 of Fibronectin;Isoform 7 of Fibronectin	FINC_HUMAN	1	55.7093	1.55709	Dengue	QC	NaN	NaN	NaN	109.17	0.0935802
Dengue / QC	_GLMAALC[Carbamidomethyl (C)]PHKFPAIQNLALR_	P08571	0.789139	0.789139	1.64893e-09	5.78404e-09	110	P08571	CD14	Monocyte differentiation antigen CD14	CD14_HUMAN	1	72.8043	1.72804	Dengue	QC	NaN	NaN	NaN	74.3939	0.0907694
Dengue / QC	_MGPTELLIEMEDWK_	P02675	3.24705	3.24705	1.66181e-09	5.82574e-09	38	P02675	FGB	Fibrinogen beta chain	FIBB_HUMAN	1	849.42	9.4942	Dengue	QC	NaN	NaN	NaN	23.9518	0.317923
Dengue / QC	_HSITNPLAVLC[Carbamidomethyl (C)]EFISQSIK_	P04114	1.02029	1.02029	1.70523e-09	5.96729e-09	74	P04114	APOB	Apolipoprotein B-100	APOB_HUMAN	1	102.833	2.02833	Dengue	QC	NaN	NaN	NaN	69.0296	0.144848
Dengue / QC	_TLVLLMGK_	P07737	1.41072	1.41072	1.70751e-09	5.97172e-09	42	P07737	PFN1	Profilin-1	PROF1_HUMAN	1	165.87	2.6587	Dengue	QC	NaN	NaN	NaN	28.8483	0.174194
Dengue / QC	_ILGEELGFASLHDLQLLGK_	P04114	0.716342	0.716342	1.7439e-09	6.09175e-09	82	P04114	APOB	Apolipoprotein B-100	APOB_HUMAN	1	64.301	1.64301	Dengue	QC	NaN	NaN	NaN	63.5526	0.119256
Dengue / QC	_TLLVFEVQQPFLFVLWDQQHKFPVFMGR_	P05155;P05155-3	3.21531	3.21531	1.77735e-09	6.20123e-09	26	P05155;P05155-3	SERPING1	Plasma protease C1 inhibitor;Isoform 3 of Plasma protease C1 inhibitor	IC1_HUMAN	1	828.763	9.28763	Dengue	QC	NaN	NaN	NaN	16.152	0.226159
Dengue / QC	_GLEWVANIK_	P01780	-0.796717	0.796717	1.83222e-09	6.37378e-09	164	P01780	IGHV3-7	Immunoglobulin heavy variable 3-7	HV307_HUMAN	1	-42.4342	0.575658	Dengue	QC	NaN	NaN	NaN	66.0513	0.111348
Dengue / QC	_NSLFEYQK_	P02671	1.74244	1.74244	1.84778e-09	6.41655e-09	92	P02671	FGA	Fibrinogen alpha chain	FIBA_HUMAN	1	234.601	3.34601	Dengue	QC	NaN	NaN	NaN	70.1341	0.215435
Dengue / QC	_KLFDYC[Carbamidomethyl (C)]DIPLC[Carbamidomethyl (C)]ASSSFDC[Carbamidomethyl (C)]GKPQVEPK_	P08519	1.9426	1.9426	1.85325e-09	6.43174e-09	44	P08519	LPA	Apolipoprotein(a)	APOA_HUMAN	1	284.398	3.84398	Dengue	QC	NaN	NaN	NaN	36.4404	0.228876
Dengue / QC	_DLFHC[Carbamidomethyl (C)]VSFTLPR_	P20742	3.31404	3.31404	1.8754e-09	6.49711e-09	36	P20742	PZP	Pregnancy zone protein	PZP_HUMAN	1	894.545	9.94545	Dengue	QC	NaN	NaN	NaN	28.1068	0.437658
Dengue / QC	_GSFQC[Carbamidomethyl (C)]GPC[Carbamidomethyl (C)]QPGFVGDQASGC[Carbamidomethyl (C)]QR_	G3XAP6;P49747	1.21027	1.21027	1.88038e-09	6.51053e-09	38	G3XAP6;P49747	COMP	Cartilage oligomeric matrix protein	G3XAP6_HUMAN;COMP_HUMAN	1	131.381	2.31381	Dengue	QC	NaN	NaN	NaN	32.3842	0.21415
Dengue / QC	_ALEWLAR_	A0A0C4DH43	-0.605332	0.605332	1.89247e-09	6.5447e-09	166	A0A0C4DH43	IGHV2-70D	Immunoglobulin heavy variable 2-70D	HV70D_HUMAN	1	-34.268	0.65732	Dengue	QC	NaN	NaN	NaN	80.457	0.0913235
Dengue / QC	_QLNYKHYDGSYSTFGER_	P01023	2.30044	2.30044	1.89226e-09	6.5447e-09	104	P01023	A2M	Alpha-2-macroglobulin	A2MG_HUMAN	1	392.606	4.92606	Dengue	QC	NaN	NaN	NaN	77.8013	0.309304
Dengue / QC	_TFGSGEADC[Carbamidomethyl (C)]GLRPLFEKK_	P00734	0.944833	0.944833	1.9162e-09	6.62288e-09	152	P00734	F2	Prothrombin	THRB_HUMAN	1	92.4966	1.92497	Dengue	QC	NaN	NaN	NaN	141.154	0.121262
Dengue / QC	_TLRVQGNDHSATR_	Q14624	2.14757	2.14757	1.9776e-09	6.82308e-09	90	Q14624	ITIH4	Inter-alpha-trypsin inhibitor heavy chain H4	ITIH4_HUMAN	1	343.079	4.43079	Dengue	QC	NaN	NaN	NaN	64.1607	0.304771
Dengue / QC	_GLVWVSR_	A0A0B4J1X5	-0.563711	0.563711	2.08036e-09	7.13577e-09	176	A0A0B4J1X5	IGHV3-74	Immunoglobulin heavy variable 3-74	HV374_HUMAN	1	-32.344	0.67656	Dengue	QC	NaN	NaN	NaN	68.2504	0.0807545
Dengue / QC	_LGNWSAMPSC[Carbamidomethyl (C)]K_	P02749	1.28393	1.28393	2.2455e-09	7.65316e-09	52	P02749	APOH	Beta-2-glycoprotein 1	APOH_HUMAN	1	143.502	2.43502	Dengue	QC	NaN	NaN	NaN	24.3031	0.140743
Dengue / QC	_ALRLPPTTTC[Carbamidomethyl (C)]QQQKEELLPAQDIK_	B4E1Z4	0.693136	0.693136	2.33424e-09	7.9235e-09	172	B4E1Z4	NaN	cDNA FLJ55673, highly similar to Complement factor B (EC 3.4.21.47)	B4E1Z4_HUMAN	1	61.6794	1.61679	Dengue	QC	NaN	NaN	NaN	153.797	0.109101
Dengue / QC	_LQDEDLGFL_	B4E1Z4	0.424571	0.424571	2.35554e-09	7.98198e-09	124	B4E1Z4	NaN	cDNA FLJ55673, highly similar to Complement factor B (EC 3.4.21.47)	B4E1Z4_HUMAN	1	34.2174	1.34217	Dengue	QC	NaN	NaN	NaN	73.7745	0.112616
Dengue / QC	_HSTFIPGTNK_	P08519	1.20085	1.20085	2.51045e-09	8.47278e-09	60	P08519	LPA	Apolipoprotein(a)	APOA_HUMAN	1	129.875	2.29875	Dengue	QC	NaN	NaN	NaN	47.4119	0.155638
Dengue / QC	_EQQALQTVC[Carbamidomethyl (C)]LK_	E9PHK0;P05452	0.558277	0.558277	2.53351e-09	8.53593e-09	50	E9PHK0;P05452	CLEC3B	Tetranectin	E9PHK0_HUMAN;TETN_HUMAN	1	47.2509	1.47251	Dengue	QC	NaN	NaN	NaN	25.8292	0.112239
Dengue / QC	_NFDEILR_	P30041	1.79591	1.79591	2.55023e-09	8.58735e-09	18	P30041	PRDX6	Peroxiredoxin-6	PRDX6_HUMAN	1	247.234	3.47234	Dengue	QC	NaN	NaN	NaN	11.5774	0.139483
Dengue / QC	_GLEWIGEIYHSGSTNYNPSLK_	A0A075B6R2	1.10519	1.10519	2.57467e-09	8.65478e-09	40	A0A075B6R2	IGHV4-4	Immunoglobulin heavy variable 4-4	HV404_HUMAN	1	115.127	2.15127	Dengue	QC	NaN	NaN	NaN	27.1319	0.185094
Dengue / QC	_LM[Oxidation (M)]NIFLKDSITTWEILAVSMSDKK_	P01024	1.16606	1.16606	2.72038e-09	9.08747e-09	86	P01024	C3	Complement C3	CO3_HUMAN	1	124.398	2.24398	Dengue	QC	NaN	NaN	NaN	56.4173	0.178204
Dengue / QC	_YVTC[Carbamidomethyl (C)]SNGDWSEPPR_	Q92496;Q92496-2	0.602206	0.602206	2.72319e-09	9.09171e-09	50	Q92496;Q92496-2	CFHR4	Complement factor H-related protein 4;Isoform 2 of Complement factor H-related protein 4	FHR4_HUMAN	1	51.8036	1.51804	Dengue	QC	NaN	NaN	NaN	35.398	0.145198
Dengue / QC	_IIYKENERFQYK_	P08603	5.2562	5.2562	2.94684e-09	9.7995e-09	20	P08603	CFH	Complement factor H	CFAH_HUMAN	1	3721.85	38.2185	Dengue	QC	NaN	NaN	NaN	12.9492	0.225358
Dengue / QC	_MKGLIDEVNQDFTNR_	P02671	1.23141	1.23141	3.01444e-09	1.00017e-08	34	P02671	FGA	Fibrinogen alpha chain	FIBA_HUMAN	1	134.797	2.34797	Dengue	QC	NaN	NaN	NaN	25.4326	0.145605
Dengue / QC	_QGDVEC[Carbamidomethyl (C)]QRTEC[Carbamidomethyl (C)]IKPVVQEVLTITPFQR_	P13671	2.67313	2.67313	3.05243e-09	1.01163e-08	36	P13671	C6	Complement component C6	CO6_HUMAN	1	537.811	6.37811	Dengue	QC	NaN	NaN	NaN	23.7222	0.295059
Dengue / QC	_FSAEFDFR_	P07225	0.508366	0.508366	3.08817e-09	1.02233e-08	134	P07225	PROS1	Vitamin K-dependent protein S	PROS_HUMAN	1	42.2438	1.42244	Dengue	QC	NaN	NaN	NaN	83.3836	0.0729807
Dengue / QC	_NTLIIYLDKVSHSEDDC[Carbamidomethyl (C)]LAFK_	P01024	0.627475	0.627475	3.17792e-09	1.05086e-08	150	P01024	C3	Complement C3	CO3_HUMAN	1	54.4859	1.54486	Dengue	QC	NaN	NaN	NaN	130.86	0.106539
Dengue / QC	_LLIYYDDLLPSGVSDRFSGSK_	A0A0B4J1U3	1.09738	1.09738	3.19196e-09	1.05491e-08	88	A0A0B4J1U3	IGLV1-36	Immunoglobulin lambda variable 1-36	LV136_HUMAN	1	113.966	2.13966	Dengue	QC	NaN	NaN	NaN	56.7336	0.169251
Dengue / QC	_S[Acetyl (Protein N-term)]ETAPAETATPAPVEK_	P16401	1.88896	1.88896	3.2247e-09	1.06453e-08	18	P16401	HIST1H1B	Histone H1.5	H15_HUMAN	1	270.367	3.70367	Dengue	QC	NaN	NaN	NaN	9.97761	0.388151
Dengue / QC	_DSMIWDC[Carbamidomethyl (C)]TC[Carbamidomethyl (C)]IGAGR_	P02751;P02751-15;P02751-3;P02751-7	0.766368	0.766368	3.24425e-09	1.07038e-08	150	P02751;P02751-15;P02751-3;P02751-7	FN1	Fibronectin;Isoform 15 of Fibronectin;Isoform 3 of Fibronectin;Isoform 7 of Fibronectin	FINC_HUMAN	1	70.0982	1.70098	Dengue	QC	NaN	NaN	NaN	135.093	0.116952
Dengue / QC	_SRWQQGNIFSC[Carbamidomethyl (C)]SVMHEALHNRFTQK_	P01860	0.964771	0.964771	3.28413e-09	1.08233e-08	72	P01860	IGHG3	Immunoglobulin heavy constant gamma 3	IGHG3_HUMAN	1	95.1754	1.95175	Dengue	QC	NaN	NaN	NaN	56.5842	0.1842
Dengue / QC	_SC[Carbamidomethyl (C)]RPNDVTC[Carbamidomethyl (C)]VFDPVHTISHTVISLPTFR_	P23142	0.873121	0.873121	3.31083e-09	1.0893e-08	128	P23142	FBLN1	Fibulin-1	FBLN1_HUMAN	1	83.1621	1.83162	Dengue	QC	NaN	NaN	NaN	111.254	0.173286
Dengue / QC	_KPIWLSQMSC[Carbamidomethyl (C)]SGR_	O43866	-0.439518	0.439518	3.39163e-09	1.11339e-08	176	O43866	CD5L	CD5 antigen-like	CD5L_HUMAN	1	-26.2619	0.737381	Dengue	QC	NaN	NaN	NaN	102.175	0.0686782
Dengue / QC	_LVPPM[Oxidation (M)]EEDYPQFGSPK_	P08697	-0.278117	0.278117	3.48281e-09	1.14078e-08	20	P08697	SERPINF2	Alpha-2-antiplasmin	A2AP_HUMAN	1	-17.5333	0.824667	Dengue	QC	NaN	NaN	NaN	9.74817	0.25391
Dengue / QC	_ELSYYSLEDLNNK_	P01031	0.328549	0.328549	3.488e-09	1.14179e-08	102	P01031	C5	Complement C5	CO5_HUMAN	1	25.575	1.25575	Dengue	QC	NaN	NaN	NaN	80.4299	0.0829987
Dengue / QC	_ANLSSQALQMSLDYGFVTPLTSMSIR_	P19827	1.43353	1.43353	3.50579e-09	1.14639e-08	38	P19827	ITIH1	Inter-alpha-trypsin inhibitor heavy chain H1	ITIH1_HUMAN	1	170.106	2.70106	Dengue	QC	NaN	NaN	NaN	24.7879	0.153256
Dengue / QC	_VLNYVDWIKKEMEEED_	B4DPQ0	0.831459	0.831459	3.55123e-09	1.16061e-08	80	B4DPQ0	C1R	Complement C1r subcomponent	B4DPQ0_HUMAN	1	77.9484	1.77948	Dengue	QC	NaN	NaN	NaN	32.7571	0.0964036
Dengue / QC	_LLIYDASSR_	A0A0C4DH25	-1.21809	1.21809	3.55812e-09	1.16222e-08	176	A0A0C4DH25	IGKV3D-20	Immunoglobulin kappa variable 3D-20	KVD20_HUMAN	1	-57.0148	0.429852	Dengue	QC	NaN	NaN	NaN	59.8889	0.177363
Dengue / QC	_NIPC[Carbamidomethyl (C)]AVTK_	P13671	0.860673	0.860673	3.56863e-09	1.165e-08	42	P13671	C6	Complement component C6	CO6_HUMAN	1	81.5885	1.81588	Dengue	QC	NaN	NaN	NaN	24.4036	0.113802
Dengue / QC	_TYLFKGSQYWR_	P04004	2.18636	2.18636	3.7434e-09	1.2207e-08	68	P04004	VTN	Vitronectin	VTNC_HUMAN	1	355.155	4.55155	Dengue	QC	NaN	NaN	NaN	55.5412	0.240244
Dengue / QC	_IALGGLLFPASNLRLPLVPALDGC[Carbamidomethyl (C)]LR_	I3L145;P04278	1.03586	1.03586	3.76968e-09	1.22845e-08	48	I3L145;P04278	SHBG	Sex hormone-binding globulin	I3L145_HUMAN;SHBG_HUMAN	1	105.034	2.05034	Dengue	QC	NaN	NaN	NaN	41.8016	0.173162
Dengue / QC	_QITVNDLPVGR_	P32119	0.540324	0.540324	3.91961e-09	1.27112e-08	102	P32119	PRDX2	Peroxiredoxin-2	PRDX2_HUMAN	1	45.4299	1.4543	Dengue	QC	NaN	NaN	NaN	89.8873	0.0811738
Dengue / QC	_LNHQLEGLTFQMK_	P06727	0.534996	0.534996	3.94569e-09	1.27746e-08	130	P06727	APOA4	Apolipoprotein A-IV	APOA4_HUMAN	1	44.8938	1.44894	Dengue	QC	NaN	NaN	NaN	125.292	0.0822822
Dengue / QC	_VNRNNLELSTPLKIETISHEDLQR_	P07225	0.836509	0.836509	3.94518e-09	1.27746e-08	96	P07225	PROS1	Vitamin K-dependent protein S	PROS_HUMAN	1	78.5723	1.78572	Dengue	QC	NaN	NaN	NaN	73.5732	0.107096
Dengue / QC	_C[Carbamidomethyl (C)]LLFSFLPASSINDMEKR_	H0YAC1;P03952	0.54996	0.54996	4.03356e-09	1.30376e-08	130	H0YAC1;P03952	KLKB1	Plasma kallikrein (Fragment);Plasma kallikrein	H0YAC1_HUMAN;KLKB1_HUMAN	1	46.4045	1.46404	Dengue	QC	NaN	NaN	NaN	79.6055	0.100183
Dengue / QC	_ALVQQMEQLR_	P06727	0.680568	0.680568	4.03787e-09	1.30444e-08	112	P06727	APOA4	Apolipoprotein A-IV	APOA4_HUMAN	1	60.2771	1.60277	Dengue	QC	NaN	NaN	NaN	94.5407	0.119681
Dengue / QC	_AQTTVTC[Carbamidomethyl (C)]TEK_	Q02985;Q02985-2	0.927714	0.927714	4.15885e-09	1.34131e-08	66	Q02985;Q02985-2	CFHR3	Complement factor H-related protein 3;Isoform 2 of Complement factor H-related protein 3	FHR3_HUMAN	1	90.2259	1.90226	Dengue	QC	NaN	NaN	NaN	36.5878	0.15033
Dengue / QC	_NRNVHSGSTFFKYYLQGAK_	Q14624	1.74896	1.74896	4.22071e-09	1.36052e-08	46	Q14624	ITIH4	Inter-alpha-trypsin inhibitor heavy chain H4	ITIH4_HUMAN	1	236.116	3.36116	Dengue	QC	NaN	NaN	NaN	34.4252	0.213957
Dengue / QC	_NIQEYLSILTDPDGKGKEK_	P04114	1.05891	1.05891	4.36683e-09	1.40301e-08	56	P04114	APOB	Apolipoprotein B-100	APOB_HUMAN	1	108.336	2.08336	Dengue	QC	NaN	NaN	NaN	50.247	0.134452
Dengue / QC	_PGMPFDLMVFVTNPDGSPAYR_	P01024	0.792854	0.792854	4.46132e-09	1.43181e-08	48	P01024	C3	Complement C3	CO3_HUMAN	1	73.2498	1.7325	Dengue	QC	NaN	NaN	NaN	29.7531	0.140066
Dengue / QC	_FTEDAKR_	P01011	1.05889	1.05889	4.47072e-09	1.43404e-08	74	P01011	SERPINA3	Alpha-1-antichymotrypsin	AACT_HUMAN	1	108.333	2.08333	Dengue	QC	NaN	NaN	NaN	63.4342	0.163502
Dengue / QC	_FQVDNNNRLLLQQVSLPELPGEYSM[Oxidation (M)]K_	P01023	0.850974	0.850974	4.63309e-09	1.4837e-08	36	P01023	A2M	Alpha-2-macroglobulin	A2MG_HUMAN	1	80.3719	1.80372	Dengue	QC	NaN	NaN	NaN	15.6745	0.582171
Dengue / QC	_YVTSAPMPEPQAPGR_	P01871	-0.665391	0.665391	4.81133e-09	1.5366e-08	176	P01871	IGHM	Immunoglobulin heavy constant mu	IGHM_HUMAN	1	-36.9482	0.630518	Dengue	QC	NaN	NaN	NaN	59.1123	0.0952949
Dengue / QC	_AHVDALRTHLAPYSDELRQR_	P02647	1.32001	1.32001	4.87824e-09	1.55628e-08	40	P02647	APOA1	Apolipoprotein A-I	APOA1_HUMAN	1	149.668	2.49668	Dengue	QC	NaN	NaN	NaN	31.149	0.138408
Dengue / QC	_DKDQEVLLQTFLDDASPGDK_	P04114	0.951227	0.951227	4.88551e-09	1.55775e-08	76	P04114	APOB	Apolipoprotein B-100	APOB_HUMAN	1	93.3516	1.93352	Dengue	QC	NaN	NaN	NaN	43.4209	0.0905894
Dengue / QC	_DKVQYEC[Carbamidomethyl (C)]ATGYYTAGGKK_	P05160	1.40748	1.40748	5.00042e-09	1.5918e-08	36	P05160	F13B	Coagulation factor XIII B chain	F13B_HUMAN	1	165.273	2.65273	Dengue	QC	NaN	NaN	NaN	17.9499	0.181342
Dengue / QC	_GGETSEMYLIQPDSSVKPYR_	P02675	2.30966	2.30966	5.12009e-09	1.62814e-08	132	P02675	FGB	Fibrinogen beta chain	FIBB_HUMAN	1	395.766	4.95766	Dengue	QC	NaN	NaN	NaN	106.689	0.34547
Dengue / QC	_NQFSLQLNSVTPEDTAVYYC[Carbamidomethyl (C)]AR_	A0A0B4J1U7	0.829445	0.829445	5.33037e-09	1.68953e-08	32	A0A0B4J1U7	IGHV6-1	Immunoglobulin heavy variable 6-1	HV601_HUMAN	1	77.7002	1.777	Dengue	QC	NaN	NaN	NaN	13.6074	0.10681
Dengue / QC	_VYTLNNEK_	H0Y300	1.90023	1.90023	5.39651e-09	1.70865e-08	20	H0Y300	HP	Haptoglobin	H0Y300_HUMAN	1	273.273	3.73273	Dengue	QC	NaN	NaN	NaN	14.8382	0.162486
Dengue / QC	_TIVTTLQDSIR_	P07996	0.47314	0.47314	5.44625e-09	1.72255e-08	90	P07996	THBS1	Thrombospondin-1	TSP1_HUMAN	1	38.8127	1.38813	Dengue	QC	NaN	NaN	NaN	80.4257	0.0926726
Dengue / QC	_YDYC[Carbamidomethyl (C)]DILEC[Carbamidomethyl (C)]EEEC[Carbamidomethyl (C)]MHC[Carbamidomethyl (C)]SGENYDGKISK_	P00747	2.29811	2.29811	5.55293e-09	1.75252e-08	50	P00747	PLG	Plasminogen	PLMN_HUMAN	1	391.814	4.91814	Dengue	QC	NaN	NaN	NaN	38.2809	0.263548
Dengue / QC	_GC[Carbamidomethyl (C)]PAALPLSNLYETLGVVGSTTTQLYTDR_	Q15582	0.893942	0.893942	5.6086e-09	1.76819e-08	52	Q15582	TGFBI	Transforming growth factor-beta-induced protein ig-h3	BGH3_HUMAN	1	85.8246	1.85825	Dengue	QC	NaN	NaN	NaN	38.961	0.132402
Dengue / QC	_VKENFDKAR_	P02753;Q5VY30	2.54315	2.54315	5.67391e-09	1.78687e-08	74	P02753;Q5VY30	RBP4	Retinol-binding protein 4;Retinol binding protein 4, plasma, isoform CRA_b	RET4_HUMAN;Q5VY30_HUMAN	1	482.86	5.8286	Dengue	QC	NaN	NaN	NaN	61.2112	0.339028
Dengue / QC	_C[Carbamidomethyl (C)]C[Carbamidomethyl (C)]VEC[Carbamidomethyl (C)]PPC[Carbamidomethyl (C)]PAPPVAGPSVFLFPPKPKDTLMISR_	P01859	1.99071	1.99071	5.69283e-09	1.79091e-08	46	P01859	IGHG2	Immunoglobulin heavy constant gamma 2	IGHG2_HUMAN	1	297.431	3.97431	Dengue	QC	NaN	NaN	NaN	39.5578	0.246251
Dengue / QC	_LGYVTADGETSGSITC[Carbamidomethyl (C)]GKDGWSAQPTC[Carbamidomethyl (C)]IK_	P08603	2.0769	2.0769	5.74296e-09	1.80572e-08	134	P08603	CFH	Complement factor H	CFAH_HUMAN	1	321.899	4.21899	Dengue	QC	NaN	NaN	NaN	104.027	0.31499
Dengue / QC	_NELIPLIYLENPR_	P20742	2.33481	2.33481	5.84574e-09	1.83412e-08	54	P20742	PZP	Pregnancy zone protein	PZP_HUMAN	1	404.483	5.04483	Dengue	QC	NaN	NaN	NaN	39.8636	0.399188
Dengue / QC	_FFTREPQDTYHYLPFSLPHR_	P10909;P10909-2;P10909-4;P10909-5	0.578462	0.578462	5.88921e-09	1.84677e-08	92	P10909;P10909-2;P10909-4;P10909-5	CLU	Clusterin;Isoform 2 of Clusterin;Isoform 4 of Clusterin;Isoform 5 of Clusterin	CLUS_HUMAN	1	49.3256	1.49326	Dengue	QC	NaN	NaN	NaN	87.4319	0.085904
Dengue / QC	_LHELQEKLSPLGEEMRDR_	P02647	1.37779	1.37779	5.9207e-09	1.85566e-08	114	P02647	APOA1	Apolipoprotein A-I	APOA1_HUMAN	1	159.871	2.59871	Dengue	QC	NaN	NaN	NaN	102.994	0.183297
Dengue / QC	_KEDSC[Carbamidomethyl (C)]QLGYSAGPC[Carbamidomethyl (C)]M[Oxidation (M)]GMTSR_	P02760	1.21666	1.21666	5.96073e-09	1.86721e-08	28	P02760	AMBP	Protein AMBP	AMBP_HUMAN	1	132.409	2.32409	Dengue	QC	NaN	NaN	NaN	21.8645	0.157538
Dengue / QC	_C[Carbamidomethyl (C)]NPGTGQC[Carbamidomethyl (C)]VC[Carbamidomethyl (C)]PAGWVGEQC[Carbamidomethyl (C)]QHC[Carbamidomethyl (C)]GGR_	O75882;O75882-2;O75882-3	0.826653	0.826653	5.98299e-09	1.87219e-08	130	O75882;O75882-2;O75882-3	ATRN	Attractin;Isoform 2 of Attractin;Isoform 3 of Attractin	ATRN_HUMAN	1	77.3566	1.77357	Dengue	QC	NaN	NaN	NaN	60.1218	0.112955
Dengue / QC	_KGYTQQLAFR_	P01024	-0.501369	0.501369	6.00891e-09	1.8783e-08	174	P01024	C3	Complement C3	CO3_HUMAN	1	-29.3564	0.706436	Dengue	QC	NaN	NaN	NaN	96.6756	0.0797849
Dengue / QC	_SDVVYTDWK_	P02763	-0.488619	0.488619	6.17227e-09	1.9263e-08	176	P02763	ORM1	Alpha-1-acid glycoprotein 1	A1AG1_HUMAN	1	-28.7293	0.712707	Dengue	QC	NaN	NaN	NaN	78.0475	0.0771547
Dengue / QC	_KALQTEMAR_	P11226	1.54096	1.54096	6.34078e-09	1.97679e-08	28	P11226	MBL2	Mannose-binding protein C	MBL2_HUMAN	1	190.989	2.90989	Dengue	QC	NaN	NaN	NaN	20.6339	0.15968
Dengue / QC	_TEDTALYYC[Carbamidomethyl (C)]AK_	A0A0B4J1X8	-0.511603	0.511603	6.44089e-09	2.00588e-08	174	A0A0B4J1X8	IGHV3-43	Immunoglobulin heavy variable 3-43	HV343_HUMAN	1	-29.8557	0.701443	Dengue	QC	NaN	NaN	NaN	95.8505	0.0888279
Dengue / QC	_FTDHLKYVMLPVADQDQC[Carbamidomethyl (C)]IR_	P00738	1.06938	1.06938	6.60083e-09	2.05026e-08	70	P00738	HP	Haptoglobin	HPT_HUMAN	1	109.853	2.09853	Dengue	QC	NaN	NaN	NaN	46.6205	0.40507
Dengue / QC	_VEPYGENFNK_	P06727	0.999468	0.999468	6.8704e-09	2.12614e-08	32	P06727	APOA4	Apolipoprotein A-IV	APOA4_HUMAN	1	99.9263	1.99926	Dengue	QC	NaN	NaN	NaN	23.2221	0.156837
Dengue / QC	_ASQHGSDVVIETDFGLR_	Q9Y6R7	1.76949	1.76949	6.96378e-09	2.15277e-08	80	Q9Y6R7	FCGBP	IgGFc-binding protein	FCGBP_HUMAN	1	240.933	3.40933	Dengue	QC	NaN	NaN	NaN	59.5123	0.255441
Dengue / QC	_KLLETEC[Carbamidomethyl (C)]PQYIR_	P05109	1.16896	1.16896	7.10261e-09	2.19145e-08	32	P05109	S100A8	Protein S100-A8	S10A8_HUMAN	1	124.85	2.2485	Dengue	QC	NaN	NaN	NaN	25	0.190293
Dengue / QC	_AVVFLEPQWYSVLEKDSVTLK_	A0A087WZR4	2.37459	2.37459	7.13266e-09	2.1992e-08	32	A0A087WZR4	FCGR3B	Low affinity immunoglobulin gamma Fc region receptor III-B	A0A087WZR4_HUMAN	1	418.589	5.18589	Dengue	QC	NaN	NaN	NaN	24.9262	0.234757
Dengue / QC	_NLNEKDYELLC[Carbamidomethyl (C)]LDGTRK_	P02787	1.74322	1.74322	7.33924e-09	2.25817e-08	90	P02787	TF	Serotransferrin	TRFE_HUMAN	1	234.782	3.34782	Dengue	QC	NaN	NaN	NaN	48.9337	0.232968
Dengue / QC	_LEPYADQLR_	P06727	0.545196	0.545196	7.39933e-09	2.27428e-08	110	P06727	APOA4	Apolipoprotein A-IV	APOA4_HUMAN	1	45.9218	1.45922	Dengue	QC	NaN	NaN	NaN	91.3602	0.099288
Dengue / QC	_VSNK[Hex]GLPAPIEK_	P01859	1.25247	1.25247	7.84407e-09	2.40095e-08	94	P01859	IGHG2	Immunoglobulin heavy constant gamma 2	IGHG2_HUMAN	1	138.248	2.38248	Dengue	QC	NaN	NaN	NaN	69.9174	0.159895
Dengue / QC	_VADALTNAVAHVDDMPNALSALSDLHAHK_	P69905	0.599003	0.599003	7.94881e-09	2.4308e-08	164	P69905	HBA1	Hemoglobin subunit alpha	HBA_HUMAN	1	51.4669	1.51467	Dengue	QC	NaN	NaN	NaN	143.4	0.0620645
Dengue / QC	_TMSGLEC[Carbamidomethyl (C)]QAWDSQSPHAHGYIPSKFPNKNLK_	P00747	1.1824	1.1824	7.94986e-09	2.4308e-08	90	P00747	PLG	Plasminogen	PLMN_HUMAN	1	126.953	2.26953	Dengue	QC	NaN	NaN	NaN	75.9254	0.153412
Dengue / QC	_C[Carbamidomethyl (C)]VLFPYGGC[Carbamidomethyl (C)]QGNGNKFYSEKEC[Carbamidomethyl (C)]R_	P02760	2.74358	2.74358	8.12751e-09	2.47868e-08	22	P02760	AMBP	Protein AMBP	AMBP_HUMAN	1	569.732	6.69732	Dengue	QC	NaN	NaN	NaN	14.0081	0.24874
Dengue / QC	_ILEGFQPSGR_	P80108	0.449921	0.449921	8.2256e-09	2.5073e-08	118	P80108	GPLD1	Phosphatidylinositol-glycan-specific phospholipase D	PHLD_HUMAN	1	36.5966	1.36597	Dengue	QC	NaN	NaN	NaN	95.1476	0.0573574
Dengue / QC	_YQC[Carbamidomethyl (C)]KNYYK_	P00738	3.78721	3.78721	8.44431e-09	2.57263e-08	56	P00738	HP	Haptoglobin	HPT_HUMAN	1	1280.59	13.8059	Dengue	QC	NaN	NaN	NaN	41.1412	0.430724
Dengue / QC	_EPC[Carbamidomethyl (C)]VESLVSQYFQTVTDYGK_	P02652;V9GYM3	0.544445	0.544445	8.47964e-09	2.58206e-08	154	P02652;V9GYM3	APOA2	Apolipoprotein A-II	APOA2_HUMAN;V9GYM3_HUMAN	1	45.8459	1.45846	Dengue	QC	NaN	NaN	NaN	122.128	0.0824115
Dengue / QC	_ETAVDGELVVLYDVKREEK_	P19823	0.783983	0.783983	8.6598e-09	2.63419e-08	128	P19823	ITIH2	Inter-alpha-trypsin inhibitor heavy chain H2	ITIH2_HUMAN	1	72.1878	1.72188	Dengue	QC	NaN	NaN	NaN	84.9124	0.105609
Dengue / QC	_C[Carbamidomethyl (C)]FESFER_	Q92954-3	0.917191	0.917191	8.74891e-09	2.65972e-08	60	Q92954-3	PRG4	Isoform C of Proteoglycan 4	PRG4_HUMAN	1	88.8435	1.88844	Dengue	QC	NaN	NaN	NaN	26.0977	0.140022
Dengue / QC	_IVEGSDAEIGMSPWQVMLFR_	P00734	0.543043	0.543043	8.77486e-09	2.66506e-08	176	P00734	F2	Prothrombin	THRB_HUMAN	1	45.7043	1.45704	Dengue	QC	NaN	NaN	NaN	111.503	0.080878
Dengue / QC	_LPQQANDYLNSFNWER_	P04114	0.942938	0.942938	8.9148e-09	2.70338e-08	38	P04114	APOB	Apolipoprotein B-100	APOB_HUMAN	1	92.2439	1.92244	Dengue	QC	NaN	NaN	NaN	29.92	0.11617
Dengue / QC	_TLVQEWTVQRPGQTC[Carbamidomethyl (C)]QPILEEQC[Carbamidomethyl (C)]LVPDSSHC[Carbamidomethyl (C)]QVLLLPLFAEC[Carbamidomethyl (C)]HK_	P04275	0.722879	0.722879	9.03948e-09	2.73836e-08	44	P04275	VWF	von Willebrand factor	VWF_HUMAN	1	65.0473	1.65047	Dengue	QC	NaN	NaN	NaN	36.681	0.16051
Dengue / QC	_GVSAYLSRPSPFDLFIR_	A0A286YES5;P01854	3.27933	3.27933	9.27257e-09	2.80609e-08	34	A0A286YES5;P01854	IGHE	Immunoglobulin heavy constant epsilon (Fragment);Immunoglobulin heavy constant epsilon	A0A286YES5_HUMAN;IGHE_HUMAN	1	870.904	9.70904	Dengue	QC	NaN	NaN	NaN	21.7043	0.361694
Dengue / QC	_TEHGSEMLFFGNAIEGK_	P04114	0.648045	0.648045	9.29889e-09	2.81239e-08	126	P04114	APOB	Apolipoprotein B-100	APOB_HUMAN	1	56.7044	1.56704	Dengue	QC	NaN	NaN	NaN	114.876	0.10256
Dengue / QC	_EYLIMGLDGATYDLEGHPQYLLDSNSWIEEMPSER_	P0C0L5	0.555384	0.555384	9.30296e-09	2.81239e-08	34	P0C0L5	C4B	Complement C4-B	CO4B_HUMAN	1	46.9559	1.46956	Dengue	QC	NaN	NaN	NaN	14.4086	0.414715
Dengue / QC	_EC[Carbamidomethyl (C)]EEIIR_	P02675	2.4434	2.4434	9.9271e-09	2.99032e-08	88	P02675	FGB	Fibrinogen beta chain	FIBB_HUMAN	1	443.921	5.43921	Dengue	QC	NaN	NaN	NaN	73.056	0.350758
Dengue / QC	_EC[Carbamidomethyl (C)]NNPPPSGGGR_	P10643	0.694573	0.694573	1.00198e-08	3.01671e-08	102	P10643	C7	Complement component C7	CO7_HUMAN	1	61.8405	1.61841	Dengue	QC	NaN	NaN	NaN	96.5669	0.128866
Dengue / QC	_VTASSPVAVLSGHSC[Carbamidomethyl (C)]AQK_	Q9Y6R7	1.43634	1.43634	1.0325e-08	3.1054e-08	56	Q9Y6R7	FCGBP	IgGFc-binding protein	FCGBP_HUMAN	1	170.634	2.70634	Dengue	QC	NaN	NaN	NaN	41.4838	0.216719
Dengue / QC	_VGVETTKPSK_	A0M8Q6	1.24948	1.24948	1.10779e-08	3.30149e-08	108	A0M8Q6	IGLC7	Immunoglobulin lambda constant 7	IGLC7_HUMAN	1	137.756	2.37756	Dengue	QC	NaN	NaN	NaN	65.2967	0.259942
Dengue / QC	_LAKTYETTLEKC[Carbamidomethyl (C)]C[Carbamidomethyl (C)]AAADPHEC[Carbamidomethyl (C)]YAK_	P02768	2.15018	2.15018	1.12363e-08	3.34702e-08	150	P02768	ALB	Serum albumin	ALBU_HUMAN	1	343.882	4.43882	Dengue	QC	NaN	NaN	NaN	113.529	0.328883
Dengue / QC	_FSC[Carbamidomethyl (C)]MC[Carbamidomethyl (C)]PQGYQVVR_	Q12805;Q12805-2;Q12805-4	1.13175	1.13175	1.14886e-08	3.41351e-08	80	Q12805;Q12805-2;Q12805-4	EFEMP1	EGF-containing fibulin-like extracellular matrix protein 1;Isoform 2 of EGF-containing fibulin-like extracellular matrix protein 1;Isoform 4 of EGF-containing fibulin-like extracellular matrix protein 1	FBLN3_HUMAN	1	119.124	2.19124	Dengue	QC	NaN	NaN	NaN	49.3301	0.164303
Dengue / QC	_FIAVGYVDDTQFVR_	P05534;P30447	2.20721	2.20721	1.15612e-08	3.43336e-08	18	P05534;P30447	HLA-A	HLA class I histocompatibility antigen, A-24 alpha chain;HLA class I histocompatibility antigen, A-23 alpha chain	1A24_HUMAN;1A23_HUMAN	1	361.782	4.61782	Dengue	QC	NaN	NaN	NaN	10.7699	0.210829
Dengue / QC	_VGYVSGWGRNANFK_	P00738	0.99385	0.99385	1.16268e-08	3.44936e-08	48	P00738	HP	Haptoglobin	HPT_HUMAN	1	99.1492	1.99149	Dengue	QC	NaN	NaN	NaN	40.5296	0.137347
Dengue / QC	_PSETTLC[Carbamidomethyl (C)]QVAGWGHQFEGAEEYASFLQEAQVPFLSLER_	P00748	1.77361	1.77361	1.16653e-08	3.4573e-08	58	P00748	F12	Coagulation factor XII	FA12_HUMAN	1	241.907	3.41907	Dengue	QC	NaN	NaN	NaN	13.3713	0.108615
Dengue / QC	_SSSGLTYIAEWK_	P33908	1.16719	1.16719	1.16943e-08	3.46414e-08	22	P33908	MAN1A1	Mannosyl-oligosaccharide 1,2-alpha-mannosidase IA	MA1A1_HUMAN	1	124.574	2.24574	Dengue	QC	NaN	NaN	NaN	15.7402	0.103592
Dengue / QC	_SDLGC[Carbamidomethyl (C)]GAGGGLNNANVFHLAGLTFLTNANADDSQENDEPC[Carbamidomethyl (C)]KEILRPR_	P01031	0.662942	0.662942	1.17228e-08	3.47085e-08	54	P01031	C5	Complement C5	CO5_HUMAN	1	58.3308	1.58331	Dengue	QC	NaN	NaN	NaN	48.6033	0.099458
Dengue / QC	_SKMLTPEHVFIHPGWK_	P09871	3.01094	3.01094	1.18653e-08	3.50422e-08	24	P09871	C1S	Complement C1s subcomponent	C1S_HUMAN	1	706.092	8.06092	Dengue	QC	NaN	NaN	NaN	16.1275	0.256848
Dengue / QC	_TVAAPSVFIFPPS[Hex]DEQLKSGTASVVC[Carbamidomethyl (C)]LLNNFYPR_	P01834	0.520446	0.520446	1.19099e-08	3.51564e-08	66	P01834	IGKC	Immunoglobulin kappa constant	IGKC_HUMAN	1	43.4398	1.4344	Dengue	QC	NaN	NaN	NaN	49.0994	0.151897
Dengue / QC	_FFSLLSGSLNSHGLELNADILGTDKINSGAHK_	P04114	0.636705	0.636705	1.20346e-08	3.54709e-08	74	P04114	APOB	Apolipoprotein B-100	APOB_HUMAN	1	55.4774	1.55477	Dengue	QC	NaN	NaN	NaN	57.7223	0.132451
Dengue / QC	_QRAAC[Carbamidomethyl (C)]AQLNDFLQEYGTQGC[Carbamidomethyl (C)]QV_	P0C0L5	2.40582	2.40582	1.23969e-08	3.64114e-08	44	P0C0L5	C4B	Complement C4-B	CO4B_HUMAN	1	429.936	5.29936	Dengue	QC	NaN	NaN	NaN	30.2044	0.298356
Dengue / QC	_HYYESEVLAMNFQDWATASR_	P08185	1.23554	1.23554	1.27303e-08	3.72602e-08	40	P08185	SERPINA6	Corticosteroid-binding globulin	CBG_HUMAN	1	135.469	2.35469	Dengue	QC	NaN	NaN	NaN	18.1914	0.126499
Dengue / QC	_ELRYDSTC[Carbamidomethyl (C)]ER_	P07357	2.24348	2.24348	1.27562e-08	3.73175e-08	38	P07357	C8A	Complement component C8 alpha chain	CO8A_HUMAN	1	373.538	4.73538	Dengue	QC	NaN	NaN	NaN	29.9119	0.279964
Dengue / QC	_IQLVEEELDRAQER_	A0A087WWU8;P06753-2	0.971769	0.971769	1.33493e-08	3.88981e-08	82	A0A087WWU8;P06753-2	TPM3	Tropomyosin alpha-3 chain;Isoform 2 of Tropomyosin alpha-3 chain	A0A087WWU8_HUMAN;TPM3_HUMAN	1	96.1244	1.96124	Dengue	QC	NaN	NaN	NaN	58.9168	0.168715
Dengue / QC	_LFDSDPITVTVPVEVSRK_	P10909;P10909-2;P10909-4;P10909-5	0.335109	0.335109	1.3423e-08	3.90935e-08	112	P10909;P10909-2;P10909-4;P10909-5	CLU	Clusterin;Isoform 2 of Clusterin;Isoform 4 of Clusterin;Isoform 5 of Clusterin	CLUS_HUMAN	1	26.1473	1.26147	Dengue	QC	NaN	NaN	NaN	92.6026	0.0658605
Dengue / QC	_C[Carbamidomethyl (C)]VYLQTSMK_	P20742	3.7518	3.7518	1.35277e-08	3.93594e-08	38	P20742	PZP	Pregnancy zone protein	PZP_HUMAN	1	1247.11	13.4711	Dengue	QC	NaN	NaN	NaN	29.9484	0.533354
Dengue / QC	_YVGGQEHFAHLLILR_	P02763	-0.38436	0.38436	1.36397e-08	3.96656e-08	176	P02763	ORM1	Alpha-1-acid glycoprotein 1	A1AG1_HUMAN	1	-23.3881	0.766119	Dengue	QC	NaN	NaN	NaN	119.838	0.0643205
Dengue / QC	_ALTDMPQMR_	P02671	2.9937	2.9937	1.37545e-08	3.99601e-08	154	P02671	FGA	Fibrinogen alpha chain	FIBA_HUMAN	1	696.516	7.96516	Dengue	QC	NaN	NaN	NaN	117.875	0.451098
Dengue / QC	_YAATSQVLLPSK_	P01871	-0.526862	0.526862	1.39026e-08	4.03504e-08	168	P01871	IGHM	Immunoglobulin heavy constant mu	IGHM_HUMAN	1	-30.5937	0.694063	Dengue	QC	NaN	NaN	NaN	137.778	0.0844145
Dengue / QC	_NHSC[Carbamidomethyl (C)]EPC[Carbamidomethyl (C)]QTLAVR_	P00748	2.09781	2.09781	1.39524e-08	4.0475e-08	24	P00748	F12	Coagulation factor XII	FA12_HUMAN	1	328.059	4.28059	Dengue	QC	NaN	NaN	NaN	16.8222	0.277192
Dengue / QC	_GQYC[Carbamidomethyl (C)]YELDEKAVRPGYPK_	P04004	3.95166	3.95166	1.41463e-08	4.09971e-08	32	P04004	VTN	Vitronectin	VTNC_HUMAN	1	1447.28	15.4728	Dengue	QC	NaN	NaN	NaN	11.3632	0.215699
Dengue / QC	_GQELC[Carbamidomethyl (C)]ADYSENTFTEYKK_	P02774;P02774-3	0.813399	0.813399	1.43841e-08	4.16248e-08	34	P02774;P02774-3	GC	Vitamin D-binding protein;Isoform 3 of Vitamin D-binding protein	VTDB_HUMAN	1	75.7346	1.75735	Dengue	QC	NaN	NaN	NaN	24.8709	0.0862018
Dengue / QC	_KGGVASGFK_	P06396	0.950575	0.950575	1.49741e-08	4.31624e-08	76	P06396	GSN	Gelsolin	GELS_HUMAN	1	93.2643	1.93264	Dengue	QC	NaN	NaN	NaN	59.2224	0.156319
Dengue / QC	_ITYYHLSFPTNIQAPAVVFR_	P23142-4	0.488079	0.488079	1.50221e-08	4.32794e-08	152	P23142-4	FBLN1	Isoform C of Fibulin-1	FBLN1_HUMAN	1	40.2576	1.40258	Dengue	QC	NaN	NaN	NaN	125.748	0.0819817
Dengue / QC	_SDVMYTDWK_	P19652	-0.388197	0.388197	1.51944e-08	4.37544e-08	176	P19652	ORM2	Alpha-1-acid glycoprotein 2	A1AG2_HUMAN	1	-23.5916	0.764084	Dengue	QC	NaN	NaN	NaN	90.5899	0.059851
Dengue / QC	_VELK[Hex]TPLGDTTHTC[Carbamidomethyl (C)]PR_	P01860	1.70377	1.70377	1.55395e-08	4.46826e-08	22	P01860	IGHG3	Immunoglobulin heavy constant gamma 3	IGHG3_HUMAN	1	225.751	3.25751	Dengue	QC	NaN	NaN	NaN	10.1938	0.42775
Dengue / QC	_SLFTDLVAEK_	P20742	3.381	3.381	1.57529e-08	4.52743e-08	40	P20742	PZP	Pregnancy zone protein	PZP_HUMAN	1	941.792	10.4179	Dengue	QC	NaN	NaN	NaN	31.6889	0.488061
Dengue / QC	_HQPQEFPTYVEPTNDEIC[Carbamidomethyl (C)]EAFRKDPK_	P02774;P02774-3	0.552027	0.552027	1.59291e-08	4.57583e-08	176	P02774;P02774-3	GC	Vitamin D-binding protein;Isoform 3 of Vitamin D-binding protein	VTDB_HUMAN	1	46.6144	1.46614	Dengue	QC	NaN	NaN	NaN	170.865	0.103478
Dengue / QC	_KQLGAGSIEEC[Carbamidomethyl (C)]AAKC[Carbamidomethyl (C)]EEDEEFTC[Carbamidomethyl (C)]R_	P00747	0.657654	0.657654	1.65434e-08	4.74073e-08	146	P00747	PLG	Plasminogen	PLMN_HUMAN	1	57.7515	1.57752	Dengue	QC	NaN	NaN	NaN	132.964	0.110813
Dengue / QC	_C[Carbamidomethyl (C)]PPPPLPINSK_	P05160	0.499474	0.499474	1.66975e-08	4.78023e-08	82	P05160	F13B	Coagulation factor XIII B chain	F13B_HUMAN	1	41.3698	1.4137	Dengue	QC	NaN	NaN	NaN	60.9054	0.116035
Dengue / QC	_RLPFIC[Carbamidomethyl (C)]SY_	P13727	2.9874	2.9874	1.67954e-08	4.79891e-08	30	P13727	PRG2	Bone marrow proteoglycan	PRG2_HUMAN	1	693.041	7.93041	Dengue	QC	NaN	NaN	NaN	17.6498	0.334846
Dengue / QC	_LLLLDLSHNSLLALEPGILDTANVEALR_	Q6EMK4	1.37541	1.37541	1.72867e-08	4.93169e-08	60	Q6EMK4	VASN	Vasorin	VASN_HUMAN	1	159.441	2.59441	Dengue	QC	NaN	NaN	NaN	28.283	0.172972
Dengue / QC	_EESPLLIGQQSTVSDVPRDLEVVAATPTSLLISWDAPAVTVR_	P02751;P02751-15;P02751-3;P02751-7	1.09518	1.09518	1.73226e-08	4.93757e-08	94	P02751;P02751-15;P02751-3;P02751-7	FN1	Fibronectin;Isoform 15 of Fibronectin;Isoform 3 of Fibronectin;Isoform 7 of Fibronectin	FINC_HUMAN	1	113.64	2.1364	Dengue	QC	NaN	NaN	NaN	31.2568	0.20464
Dengue / QC	_HHFPRHPNVFGFC[Carbamidomethyl (C)]R_	P04196	3.74205	3.74205	1.81032e-08	5.14513e-08	26	P04196	HRG	Histidine-rich glycoprotein	HRG_HUMAN	1	1238.04	13.3804	Dengue	QC	NaN	NaN	NaN	16.8444	0.367476
Dengue / QC	_SNFLNC[Carbamidomethyl (C)]YVSGFHPSDIEVDLLK_	P61769	1.15157	1.15157	1.82249e-08	5.17223e-08	102	P61769	B2M	Beta-2-microglobulin	B2MG_HUMAN	1	122.156	2.22156	Dengue	QC	NaN	NaN	NaN	79.5411	0.180742
Dengue / QC	_C[Carbamidomethyl (C)]KVSNKALPAPIEK_	P01857	2.43871	2.43871	1.83315e-08	5.19706e-08	26	P01857	IGHG1	Immunoglobulin heavy constant gamma 1	IGHG1_HUMAN	1	442.155	5.42155	Dengue	QC	NaN	NaN	NaN	20.5486	0.312004
Dengue / QC	_KGGETSEMYLIQPDSSVKPYR_	P02675	2.4991	2.4991	1.87946e-08	5.31339e-08	132	P02675	FGB	Fibrinogen beta chain	FIBB_HUMAN	1	465.334	5.65334	Dengue	QC	NaN	NaN	NaN	106.622	0.374555
Dengue / QC	_LYLQMSTHGK_	A0A0C4DFP6;Q9NQ79;Q9NQ79-2	1.28394	1.28394	1.90591e-08	5.38558e-08	48	A0A0C4DFP6;Q9NQ79;Q9NQ79-2	CRTAC1	Cartilage acidic protein 1;Cartilage acidic protein 1;Isoform 2 of Cartilage acidic protein 1	A0A0C4DFP6_HUMAN;CRAC1_HUMAN;CRAC1_HUMAN	1	143.502	2.43502	Dengue	QC	NaN	NaN	NaN	16.5932	0.12415
Dengue / QC	_EFQLFSSPHGK_	P02787	-0.374207	0.374207	1.90767e-08	5.38798e-08	176	P02787	TF	Serotransferrin	TRFE_HUMAN	1	-22.8471	0.771529	Dengue	QC	NaN	NaN	NaN	106.892	0.0651943
Dengue / QC	_IGDQWDK_	P02751;P02751-15;P02751-3;P02751-7	1.17295	1.17295	1.93857e-08	5.47001e-08	52	P02751;P02751-15;P02751-3;P02751-7	FN1	Fibronectin;Isoform 15 of Fibronectin;Isoform 3 of Fibronectin;Isoform 7 of Fibronectin	FINC_HUMAN	1	125.472	2.25472	Dengue	QC	NaN	NaN	NaN	44.504	0.149691
Dengue / QC	_EC[Carbamidomethyl (C)]C[Carbamidomethyl (C)]EK[Hex]PLLEK_	P02768	2.18393	2.18393	1.98592e-08	5.5822e-08	130	P02768	ALB	Serum albumin	ALBU_HUMAN	1	354.39	4.5439	Dengue	QC	NaN	NaN	NaN	105.952	0.410969
Dengue / QC	_SGLSTGWTQLSKLLELTGPKSLPAPWLSMAPVSWITPGLK_	P04217	0.505326	0.505326	1.99699e-08	5.60796e-08	152	P04217	A1BG	Alpha-1B-glycoprotein	A1BG_HUMAN	1	41.9444	1.41944	Dengue	QC	NaN	NaN	NaN	46.4376	0.173245
Dengue / QC	_GLEWMGR_	A0A0J9YXX1	0.478895	0.478895	2.10816e-08	5.89483e-08	162	A0A0J9YXX1	IGHV5-10-1	Immunoglobulin heavy variable 5-10-1	HV5X1_HUMAN	1	39.3676	1.39368	Dengue	QC	NaN	NaN	NaN	142.74	0.0870807
Dengue / QC	_EHAVEGDC[Carbamidomethyl (C)]DFQLLKLDGK_	P02765	0.812937	0.812937	2.12638e-08	5.94296e-08	172	P02765	AHSG	Alpha-2-HS-glycoprotein	FETUA_HUMAN	1	75.6784	1.75678	Dengue	QC	NaN	NaN	NaN	161.491	0.128019
Dengue / QC	_QRPPDLDTSSNAVDLLFFTDESGDSR_	B4DPQ0	0.563774	0.563774	2.15382e-08	6.00825e-08	140	B4DPQ0	C1R	Complement C1r subcomponent	B4DPQ0_HUMAN	1	47.8131	1.47813	Dengue	QC	NaN	NaN	NaN	99.2719	0.101251
Dengue / QC	_ITEVALMGHLSC[Carbamidomethyl (C)]DTKEER_	P04114	0.486778	0.486778	2.16206e-08	6.02838e-08	116	P04114	APOB	Apolipoprotein B-100	APOB_HUMAN	1	40.1312	1.40131	Dengue	QC	NaN	NaN	NaN	83.6599	0.065725
Dengue / QC	_MELERPGGNEITR_	P02671	2.98745	2.98745	2.16745e-08	6.04054e-08	142	P02671	FGA	Fibrinogen alpha chain	FIBA_HUMAN	1	693.068	7.93068	Dengue	QC	NaN	NaN	NaN	115.143	0.407062
Dengue / QC	_GGSTSYGTGSETESPR_	P02671	2.15049	2.15049	2.18445e-08	6.07927e-08	120	P02671	FGA	Fibrinogen alpha chain	FIBA_HUMAN	1	343.98	4.4398	Dengue	QC	NaN	NaN	NaN	89.3312	0.327531
Dengue / QC	_AHYGGFTVQNEANKYQISVNK_	P02675	2.42051	2.42051	2.19652e-08	6.09559e-08	132	P02675	FGB	Fibrinogen beta chain	FIBB_HUMAN	1	435.362	5.35362	Dengue	QC	NaN	NaN	NaN	110.189	0.338705
Dengue / QC	_C[Carbamidomethyl (C)]VPVC[Carbamidomethyl (C)]GVPREPFEEKQR_	P09871	1.49448	1.49448	2.20493e-08	6.11604e-08	120	P09871	C1S	Complement C1s subcomponent	C1S_HUMAN	1	181.762	2.81762	Dengue	QC	NaN	NaN	NaN	104.018	0.196495
Dengue / QC	_AVSM[Oxidation (M)]PSFSILGSDVRVPSYTLILPSLELPVLHVPR_	P04114	0.676854	0.676854	2.2369e-08	6.19014e-08	110	P04114	APOB	Apolipoprotein B-100	APOB_HUMAN	1	59.865	1.59865	Dengue	QC	NaN	NaN	NaN	68.8354	0.181655
Dengue / QC	_LTYTNWNEGEPNNAGSDEDC[Carbamidomethyl (C)]VLLLK_	P11226	1.29762	1.29762	2.27665e-08	6.29126e-08	44	P11226	MBL2	Mannose-binding protein C	MBL2_HUMAN	1	145.823	2.45823	Dengue	QC	NaN	NaN	NaN	21.1723	0.131424
Dengue / QC	_VTSTLTIK_	P01871	-0.514649	0.514649	2.36245e-08	6.51306e-08	174	P01871	IGHM	Immunoglobulin heavy constant mu	IGHM_HUMAN	1	-30.0037	0.699963	Dengue	QC	NaN	NaN	NaN	80.721	0.0852768
Dengue / QC	_DFGTHYITEAVLGGIYEYTLVMNK_	P07358	0.899569	0.899569	2.40657e-08	6.6224e-08	38	P07358	C8B	Complement component C8 beta chain	CO8B_HUMAN	1	86.5508	1.86551	Dengue	QC	NaN	NaN	NaN	29.9516	0.134425
Dengue / QC	_FQILTLWLPDSLTTWEIHGLSLSK_	P0C0L5	0.742714	0.742714	2.44507e-08	6.71253e-08	62	P0C0L5	C4B	Complement C4-B	CO4B_HUMAN	1	67.3321	1.67332	Dengue	QC	NaN	NaN	NaN	40.3923	0.140209
Dengue / QC	_GQPREPQVYTLPPSQEEMTKNQVSLTC[Carbamidomethyl (C)]LVK_	P01861	1.54785	1.54785	2.47289e-08	6.77941e-08	74	P01861	IGHG4	Immunoglobulin heavy constant gamma 4	IGHG4_HUMAN	1	192.381	2.92381	Dengue	QC	NaN	NaN	NaN	60.639	0.250565
Dengue / QC	_SLALGTFAHTPALASLGLSNNR_	P35858;P35858-2	0.726538	0.726538	2.54093e-08	6.94332e-08	132	P35858;P35858-2	IGFALS	Insulin-like growth factor-binding protein complex acid labile subunit;Isoform 2 of Insulin-like growth factor-binding protein complex acid labile subunit	ALS_HUMAN	1	65.4664	1.65466	Dengue	QC	NaN	NaN	NaN	85.2888	0.109856
Dengue / QC	_LFLEPTQADIALLK_	P08519	1.04564	1.04564	2.61251e-08	7.11908e-08	108	P08519	LPA	Apolipoprotein(a)	APOA_HUMAN	1	106.429	2.06429	Dengue	QC	NaN	NaN	NaN	84.8972	0.116604
Dengue / QC	_TRRVDTVDPPYPR_	P04004	1.34768	1.34768	2.73046e-08	7.39599e-08	158	P04004	VTN	Vitronectin	VTNC_HUMAN	1	154.503	2.54503	Dengue	QC	NaN	NaN	NaN	142.042	0.203327
Dengue / QC	_PQYMVLVPSLLHTETTEK_	P01023	0.646373	0.646373	2.77453e-08	7.50499e-08	114	P01023	A2M	Alpha-2-macroglobulin	A2MG_HUMAN	1	56.5229	1.56523	Dengue	QC	NaN	NaN	NaN	101.148	0.107137
Dengue / QC	_TLSLPELEQQQEQQQEQQQEQVQMLAPLES_	P06727	0.558005	0.558005	2.79175e-08	7.54464e-08	116	P06727	APOA4	Apolipoprotein A-IV	APOA4_HUMAN	1	47.2232	1.47223	Dengue	QC	NaN	NaN	NaN	106.42	0.0933611
Dengue / QC	_ASSIIDELFQDRFFTREPQDTYHYLPFSLPHR_	P10909;P10909-2;P10909-4;P10909-5	0.727772	0.727772	2.79522e-08	7.55055e-08	152	P10909;P10909-2;P10909-4;P10909-5	CLU	Clusterin;Isoform 2 of Clusterin;Isoform 4 of Clusterin;Isoform 5 of Clusterin	CLUS_HUMAN	1	65.6079	1.65608	Dengue	QC	NaN	NaN	NaN	109.015	0.113916
Dengue / QC	_AITPPHPASQANIIFDITEGNLRDSFDIIKR_	P23142	1.17608	1.17608	2.87045e-08	7.73603e-08	46	P23142	FBLN1	Fibulin-1	FBLN1_HUMAN	1	125.962	2.25962	Dengue	QC	NaN	NaN	NaN	38.9495	0.164008
Dengue / QC	_VIPAC[Carbamidomethyl (C)]LPSPNYVVADRTEC[Carbamidomethyl (C)]FITGWGETQGTFGAGLLK_	P00747	0.580533	0.580533	2.95241e-08	7.94235e-08	126	P00747	PLG	Plasminogen	PLMN_HUMAN	1	49.5402	1.4954	Dengue	QC	NaN	NaN	NaN	58.6648	0.0804654
Dengue / QC	_YEGGREHVAHLLFLRDTK_	P19652	1.2323	1.2323	2.95758e-08	7.95263e-08	114	P19652	ORM2	Alpha-1-acid glycoprotein 2	A1AG2_HUMAN	1	134.941	2.34941	Dengue	QC	NaN	NaN	NaN	99.3603	0.175059
Dengue / QC	_HNEVWHLVGITSWGEGC[Carbamidomethyl (C)]AQR_	P03951	1.56973	1.56973	2.96415e-08	7.96303e-08	22	P03951	F11	Coagulation factor XI	FA11_HUMAN	1	196.849	2.96849	Dengue	QC	NaN	NaN	NaN	13.5912	0.200279
Dengue / QC	_GVAGGSVAVLC[Carbamidomethyl (C)]PYNR_	P01833	1.74877	1.74877	2.97102e-08	7.9718e-08	84	P01833	PIGR	Polymeric immunoglobulin receptor	PIGR_HUMAN	1	236.072	3.36072	Dengue	QC	NaN	NaN	NaN	58.8014	0.274384
Dengue / QC	_LSNLIKLAQKVPTADLEDVLPLAEDITNILSK_	P02774;P02774-3	2.35434	2.35434	3.00029e-08	8.03811e-08	44	P02774;P02774-3	GC	Vitamin D-binding protein;Isoform 3 of Vitamin D-binding protein	VTDB_HUMAN	1	411.362	5.11362	Dengue	QC	NaN	NaN	NaN	34.8695	0.34366
Dengue / QC	_YLTWASR_	A0A0G2JMB2	-0.627126	0.627126	3.02016e-08	8.08767e-08	168	A0A0G2JMB2	IGHA2	Immunoglobulin heavy constant alpha 2 (Fragment)	A0A0G2JMB2_HUMAN	1	-35.2535	0.647465	Dengue	QC	NaN	NaN	NaN	84.3172	0.0966473
Dengue / QC	_GHMLENHVERLWAYLTIQELLAKR_	P19827	0.753322	0.753322	3.08067e-08	8.23844e-08	164	P19827	ITIH1	Inter-alpha-trypsin inhibitor heavy chain H1	ITIH1_HUMAN	1	68.567	1.68567	Dengue	QC	NaN	NaN	NaN	122.808	0.118318
Dengue / QC	_SYSC[Carbamidomethyl (C)]QVM[Oxidation (M)]HEGSTVEK_	P15814	1.18002	1.18002	3.08394e-08	8.24345e-08	142	P15814	IGLL1	Immunoglobulin lambda-like polypeptide 1	IGLL1_HUMAN	1	126.58	2.2658	Dengue	QC	NaN	NaN	NaN	63.4575	0.762474
Dengue / QC	_LLIYDASNR_	P04433	-0.644444	0.644444	3.14663e-08	8.39398e-08	176	P04433	IGKV3-11	Immunoglobulin kappa variable 3-11	KV311_HUMAN	1	-36.0261	0.639739	Dengue	QC	NaN	NaN	NaN	48.7755	0.0985457
Dengue / QC	_ASPAFLASQNTKGEESYC[Carbamidomethyl (C)]IC[Carbamidomethyl (C)]GNER_	P20742	3.53717	3.53717	3.14739e-08	8.39398e-08	34	P20742	PZP	Pregnancy zone protein	PZP_HUMAN	1	1060.9	11.609	Dengue	QC	NaN	NaN	NaN	27.9987	0.465339
Dengue / QC	_NTEQEEGGEAVHEVEVVIK_	P00742	1.10224	1.10224	3.18377e-08	8.47949e-08	54	P00742	F10	Coagulation factor X	FA10_HUMAN	1	114.688	2.14688	Dengue	QC	NaN	NaN	NaN	48.2088	0.121449
Dengue / QC	_AGFSWIEVTFK_	Q14624	0.762545	0.762545	3.38208e-08	8.98732e-08	44	Q14624	ITIH4	Inter-alpha-trypsin inhibitor heavy chain H4	ITIH4_HUMAN	1	69.648	1.69648	Dengue	QC	NaN	NaN	NaN	38.2246	0.10744
Dengue / QC	_GRYEFHSLNIHSC[Carbamidomethyl (C)]ELLHSALRPVPGQGLSLSISDSSIR_	P18428	0.9656	0.9656	3.41206e-08	9.05473e-08	40	P18428	LBP	Lipopolysaccharide-binding protein	LBP_HUMAN	1	95.2876	1.95288	Dengue	QC	NaN	NaN	NaN	27.0137	0.150074
Dengue / QC	_QEELC[Carbamidomethyl (C)]LAR_	P02753;Q5VY30	0.625867	0.625867	3.42268e-08	9.07882e-08	158	P02753;Q5VY30	RBP4	Retinol-binding protein 4;Retinol binding protein 4, plasma, isoform CRA_b	RET4_HUMAN;Q5VY30_HUMAN	1	54.3138	1.54314	Dengue	QC	NaN	NaN	NaN	89.2105	0.0955801
Dengue / QC	_TPENYPNAGLTR_	P08519	1.81158	1.81158	3.42453e-08	9.07962e-08	84	P08519	LPA	Apolipoprotein(a)	APOA_HUMAN	1	251.026	3.51026	Dengue	QC	NaN	NaN	NaN	70.8427	0.286847
Dengue / QC	_TVLSPVEPSC[Carbamidomethyl (C)]EGMQC[Carbamidomethyl (C)]AAGQR_	Q9Y6R7	1.32322	1.32322	3.4365e-08	9.10318e-08	40	Q9Y6R7	FCGBP	IgGFc-binding protein	FCGBP_HUMAN	1	150.224	2.50224	Dengue	QC	NaN	NaN	NaN	27.9186	0.218761
Dengue / QC	_TEQAAVAR_	P00748	0.641669	0.641669	3.47882e-08	9.21114e-08	162	P00748	F12	Coagulation factor XII	FA12_HUMAN	1	56.0133	1.56013	Dengue	QC	NaN	NaN	NaN	71.3208	0.100557
Dengue / QC	_GYTQQLAFR_	P01024	-0.426043	0.426043	3.50448e-08	9.27408e-08	176	P01024	C3	Complement C3	CO3_HUMAN	1	-25.5699	0.744301	Dengue	QC	NaN	NaN	NaN	109.286	0.0710795
Dengue / QC	_YILQGVTSWGLGC[Carbamidomethyl (C)]ARPNKPGVYVR_	P00747	0.654437	0.654437	3.56522e-08	9.42717e-08	50	P00747	PLG	Plasminogen	PLMN_HUMAN	1	57.4001	1.574	Dengue	QC	NaN	NaN	NaN	32.1782	0.0871379
Dengue / QC	_AFQPFFVELTMPYSVIRGEAFTLK_	P01023	0.865721	0.865721	3.63942e-08	9.61472e-08	116	P01023	A2M	Alpha-2-macroglobulin	A2MG_HUMAN	1	82.2251	1.82225	Dengue	QC	NaN	NaN	NaN	84.8451	0.141012
Dengue / QC	_INHGILYDEEKYKPFSQVPTGEVFYYSC[Carbamidomethyl (C)]EYNFVSPSK_	Q03591	0.808742	0.808742	3.64412e-08	9.62283e-08	70	Q03591	CFHR1	Complement factor H-related protein 1	FHR1_HUMAN	1	75.1684	1.75168	Dengue	QC	NaN	NaN	NaN	61.6884	0.113006
Dengue / QC	_PGFT[HexN]IVGPN[HexN]SVQC[Carbamidomethyl (C)]YHFGLS[HexNAc]PDLPIC[Carbamidomethyl (C)]K_	P08603	1.17858	1.17858	3.81314e-08	1.00287e-07	54	P08603	CFH	Complement factor H	CFAH_HUMAN	1	126.353	2.26353	Dengue	QC	NaN	NaN	NaN	49.3654	0.196816
Dengue / QC	_LDVDQALNR_	I3L145;P04278	1.27316	1.27316	3.82815e-08	1.00547e-07	38	I3L145;P04278	SHBG	Sex hormone-binding globulin	I3L145_HUMAN;SHBG_HUMAN	1	141.691	2.41691	Dengue	QC	NaN	NaN	NaN	26.7203	0.290049
Dengue / QC	_AFLEVNEEGSEAAASTAVVIAGR_	P01008	0.758866	0.758866	3.83829e-08	1.00723e-07	176	P01008	SERPINC1	Antithrombin-III	ANT3_HUMAN	1	69.216	1.69216	Dengue	QC	NaN	NaN	NaN	148.799	0.115823
Dengue / QC	_VGSDSVQC[Carbamidomethyl (C)]YQFGWSPNFPTC[Carbamidomethyl (C)]K_	Q9BXR6	1.0259	1.0259	3.84199e-08	1.0073e-07	36	Q9BXR6	CFHR5	Complement factor H-related protein 5	FHR5_HUMAN	1	103.623	2.03623	Dengue	QC	NaN	NaN	NaN	29.7021	0.178246
Dengue / QC	_DEPTYILNIK_	P04114	0.550953	0.550953	3.90965e-08	1.02367e-07	60	P04114	APOB	Apolipoprotein B-100	APOB_HUMAN	1	46.5053	1.46505	Dengue	QC	NaN	NaN	NaN	42.351	0.134916
Dengue / QC	_GGGAGFISGLSYLELDNPAGNK_	P10643	0.946846	0.946846	3.91552e-08	1.02451e-07	98	P10643	C7	Complement component C7	CO7_HUMAN	1	92.7654	1.92765	Dengue	QC	NaN	NaN	NaN	84.9385	0.15866
Dengue / QC	_K[Hex]ASYLDC[Carbamidomethyl (C)]IR_	P02787	0.766756	0.766756	4.00447e-08	1.04571e-07	116	P02787	TF	Serotransferrin	TRFE_HUMAN	1	70.144	1.70144	Dengue	QC	NaN	NaN	NaN	99.0652	0.15523
Dengue / QC	_LTSLSDRYVSHFETEGPHVLLYFDSVPTSR_	P0C0L5	0.464134	0.464134	4.01667e-08	1.04843e-07	154	P0C0L5	C4B	Complement C4-B	CO4B_HUMAN	1	37.9489	1.37949	Dengue	QC	NaN	NaN	NaN	107.326	0.101093
Dengue / QC	_LQDAEIAR_	P06703;R4GN98	1.13742	1.13742	4.03492e-08	1.05273e-07	34	P06703;R4GN98	S100A6	Protein S100-A6;Protein S100 (Fragment)	S10A6_HUMAN;R4GN98_HUMAN	1	119.987	2.19987	Dengue	QC	NaN	NaN	NaN	24.8179	0.125097
Dengue / QC	_ASQSVSSYLAWYQQKPGQAPR_	P04433	-0.586188	0.586188	4.11493e-08	1.07218e-07	176	P04433	IGKV3-11	Immunoglobulin kappa variable 3-11	KV311_HUMAN	1	-33.39	0.6661	Dengue	QC	NaN	NaN	NaN	75.8411	0.0952413
Dengue / QC	_VVFLNTQLC[Carbamidomethyl (C)]QFRPDAFGGLPR_	P22792	0.310159	0.310159	4.12085e-08	1.07277e-07	136	P22792	CPN2	Carboxypeptidase N subunit 2	CPN2_HUMAN	1	23.9845	1.23984	Dengue	QC	NaN	NaN	NaN	99.6503	0.0625766
Dengue / QC	_FTISRDDSKNTLYLQMNSLK_	A0A0B4J1V0	0.737807	0.737807	4.16382e-08	1.083e-07	18	A0A0B4J1V0	IGHV3-15	Immunoglobulin heavy variable 3-15	HV315_HUMAN	1	66.7639	1.66764	Dengue	QC	NaN	NaN	NaN	6.49047	0.182681
Dengue / QC	_IKKWLTFSLGK_	P11226	1.13419	1.13419	4.1724e-08	1.08475e-07	42	P11226	MBL2	Mannose-binding protein C	MBL2_HUMAN	1	119.495	2.19495	Dengue	QC	NaN	NaN	NaN	26.4672	0.162051
Dengue / QC	_VGDTYERPKDSMIWDC[Carbamidomethyl (C)]TC[Carbamidomethyl (C)]IGAGR_	P02751;P02751-15;P02751-3;P02751-7	2.46237	2.46237	4.18846e-08	1.08844e-07	34	P02751;P02751-15;P02751-3;P02751-7	FN1	Fibronectin;Isoform 15 of Fibronectin;Isoform 3 of Fibronectin;Isoform 7 of Fibronectin	FINC_HUMAN	1	451.122	5.51122	Dengue	QC	NaN	NaN	NaN	28.0065	0.340945
Dengue / QC	_VMPIC[Carbamidomethyl (C)]LPSKNYAEVGR_	P00739	0.856322	0.856322	4.1984e-08	1.09055e-07	134	P00739	HPR	Haptoglobin-related protein	HPTR_HUMAN	1	81.0417	1.81042	Dengue	QC	NaN	NaN	NaN	111.736	0.13684
Dengue / QC	_YTTFEYPNTISFSC[Carbamidomethyl (C)]NTGFYLNGADSAK_	P02749	0.884903	0.884903	4.21186e-08	1.09334e-07	110	P02749	APOH	Beta-2-glycoprotein 1	APOH_HUMAN	1	84.6641	1.84664	Dengue	QC	NaN	NaN	NaN	55.5577	0.134929
Dengue / QC	_EEMTKNQVSLTC[Carbamidomethyl (C)]LVK_	P01860	0.87519	0.87519	4.25984e-08	1.10504e-07	174	P01860	IGHG3	Immunoglobulin heavy constant gamma 3	IGHG3_HUMAN	1	83.4249	1.83425	Dengue	QC	NaN	NaN	NaN	146.095	0.120781
Dengue / QC	_AVLTIDEK_	P01009	-0.498874	0.498874	4.26894e-08	1.10692e-07	176	P01009	SERPINA1	Alpha-1-antitrypsin	A1AT_HUMAN	1	-29.2341	0.707659	Dengue	QC	NaN	NaN	NaN	68.3412	0.0784797
Dengue / QC	_MENAELDVPIQSVFTR_	P07996	0.433103	0.433103	4.30989e-08	1.11606e-07	122	P07996	THBS1	Thrombospondin-1	TSP1_HUMAN	1	35.0134	1.35013	Dengue	QC	NaN	NaN	NaN	91.2356	0.095357
Dengue / QC	_WDFDNRPHILHGEYIEFIC[Carbamidomethyl (C)]R_	P05160	1.24495	1.24495	4.36229e-08	1.12863e-07	32	P05160	F13B	Coagulation factor XIII B chain	F13B_HUMAN	1	137.01	2.3701	Dengue	QC	NaN	NaN	NaN	24.0325	0.151413
Dengue / QC	_AHVDALR_	P02647	0.541314	0.541314	4.50396e-08	1.16273e-07	148	P02647	APOA1	Apolipoprotein A-I	APOA1_HUMAN	1	45.5297	1.4553	Dengue	QC	NaN	NaN	NaN	104.622	0.101856
Dengue / QC	_KC[Carbamidomethyl (C)]YFPYLENGYNQNYGRK_	P08603	0.890753	0.890753	4.51558e-08	1.16522e-07	124	P08603	CFH	Complement factor H	CFAH_HUMAN	1	85.4143	1.85414	Dengue	QC	NaN	NaN	NaN	98.4443	0.120295
Dengue / QC	_KVLLDGVQNPRAEDLVGK_	P01024	1.07362	1.07362	4.61602e-08	1.18958e-07	122	P01024	C3	Complement C3	CO3_HUMAN	1	110.471	2.10471	Dengue	QC	NaN	NaN	NaN	106.388	0.160814
Dengue / QC	_LVNGQSHISLSKAEFQDALEKLNMGITDLQGLR_	P0C0L5	0.519295	0.519295	4.62545e-08	1.19096e-07	150	P0C0L5	C4B	Complement C4-B	CO4B_HUMAN	1	43.3254	1.43325	Dengue	QC	NaN	NaN	NaN	82.3938	0.102997
Dengue / QC	_FRVVSVDENFRPR_	P20742	2.07991	2.07991	4.71946e-08	1.21304e-07	106	P20742	PZP	Pregnancy zone protein	PZP_HUMAN	1	322.78	4.2278	Dengue	QC	NaN	NaN	NaN	75.9437	0.321994
Dengue / QC	_DSGVPDRFSGSGSGTDFTLK_	P06310	-0.434242	0.434242	5.07384e-08	1.29959e-07	176	P06310	IGKV2-30	Immunoglobulin kappa variable 2-30	KV230_HUMAN	1	-25.9918	0.740082	Dengue	QC	NaN	NaN	NaN	97.5113	0.0699169
Dengue / QC	_MGVSWIR_	A0A0B4J1V2	-0.574231	0.574231	5.24453e-08	1.33923e-07	154	A0A0B4J1V2	IGHV2-26	Immunoglobulin heavy variable 2-26	HV226_HUMAN	1	-32.8356	0.671644	Dengue	QC	NaN	NaN	NaN	89.6588	0.0948187
Dengue / QC	_SSSNEEVMFLTVQVKGPTQEFK_	P01023	1.29187	1.29187	5.41898e-08	1.37899e-07	74	P01023	A2M	Alpha-2-macroglobulin	A2MG_HUMAN	1	144.845	2.44845	Dengue	QC	NaN	NaN	NaN	48.7289	0.174951
Dengue / QC	_RHLVPGAPFLLQALVREMSGSPASGIPVK_	P0C0L5	0.926437	0.926437	5.56359e-08	1.41274e-07	88	P0C0L5	C4B	Complement C4-B	CO4B_HUMAN	1	90.0576	1.90058	Dengue	QC	NaN	NaN	NaN	71.9713	0.167638
Dengue / QC	_NALTGLPPGLFQASATLDTLVLK_	P02750	0.564913	0.564913	5.66305e-08	1.43428e-07	114	P02750	LRG1	Leucine-rich alpha-2-glycoprotein	A2GL_HUMAN	1	47.9298	1.4793	Dengue	QC	NaN	NaN	NaN	85.1681	0.114263
Dengue / QC	_MPC[Carbamidomethyl (C)]AEDYLSVVLNQLC[Carbamidomethyl (C)]VLHEK_	P02768	0.717255	0.717255	5.94227e-08	1.50048e-07	176	P02768	ALB	Serum albumin	ALBU_HUMAN	1	64.4051	1.64405	Dengue	QC	NaN	NaN	NaN	107.848	0.13291
Dengue / QC	_TVM[Oxidation (M)]VNIENPEGIPVKQDSLSSQNQLGVLPLSWDIPELVNMGQWK_	P01024	0.774088	0.774088	6.12697e-08	1.54504e-07	64	P01024	C3	Complement C3	CO3_HUMAN	1	71.0109	1.71011	Dengue	QC	NaN	NaN	NaN	48.082	0.185968
Dengue / QC	_LRC[Carbamidomethyl (C)]NGDNDC[Carbamidomethyl (C)]GDFSDEDDC[Carbamidomethyl (C)]ESEPRPPC[Carbamidomethyl (C)]R_	P02748	0.730694	0.730694	6.14874e-08	1.54929e-07	112	P02748	C9	Complement component C9	CO9_HUMAN	1	65.9437	1.65944	Dengue	QC	NaN	NaN	NaN	53.1375	0.106428
Dengue / QC	_QQNAQGGFSSTQDTVVALHALSK_	P01023	-0.398745	0.398745	6.29451e-08	1.58331e-07	176	P01023	A2M	Alpha-2-macroglobulin	A2MG_HUMAN	1	-24.1482	0.758518	Dengue	QC	NaN	NaN	NaN	138.289	0.0678725
Dengue / QC	_MAESGYDIALLK_	P03951	1.50614	1.50614	6.41371e-08	1.61192e-07	38	P03951	F11	Coagulation factor XI	FA11_HUMAN	1	184.049	2.84049	Dengue	QC	NaN	NaN	NaN	22.5831	0.199982
Dengue / QC	_GSESGIFTNTK_	P02671	1.60606	1.60606	6.43843e-08	1.61744e-07	166	P02671	FGA	Fibrinogen alpha chain	FIBA_HUMAN	1	204.42	3.0442	Dengue	QC	NaN	NaN	NaN	125.444	0.24843
Dengue / QC	_C[Carbamidomethyl (C)]RGQSISVTSIRPC[Carbamidomethyl (C)]AAETQ_	P10643	1.12185	1.12185	6.46329e-08	1.62299e-07	108	P10643	C7	Complement component C7	CO7_HUMAN	1	117.626	2.17626	Dengue	QC	NaN	NaN	NaN	94.2698	0.170446
Dengue / QC	_DVVLTTTFVDDIK_	P02748	0.441322	0.441322	6.56974e-08	1.64902e-07	146	P02748	C9	Complement component C9	CO9_HUMAN	1	35.7848	1.35785	Dengue	QC	NaN	NaN	NaN	109.748	0.0761515
Dengue / QC	_MADEAGSEADHEGTHSTK_	P02671	1.47639	1.47639	6.64903e-08	1.66821e-07	168	P02671	FGA	Fibrinogen alpha chain	FIBA_HUMAN	1	178.251	2.78251	Dengue	QC	NaN	NaN	NaN	149.878	0.258392
Dengue / QC	_YEDGTLSLTSTSDLQSGIIK_	P04114	0.453955	0.453955	6.68884e-08	1.67748e-07	138	P04114	APOB	Apolipoprotein B-100	APOB_HUMAN	1	36.979	1.36979	Dengue	QC	NaN	NaN	NaN	121.275	0.0879984
Dengue / QC	_NKPGVYTDVAYYLAWIREHTVS_	P00748	1.53292	1.53292	6.88222e-08	1.72012e-07	90	P00748	F12	Coagulation factor XII	FA12_HUMAN	1	189.371	2.89371	Dengue	QC	NaN	NaN	NaN	74.8565	0.241588
Dengue / QC	_EVEGQILGTYVC[Carbamidomethyl (C)]IK_	P20851;P20851-2	0.661888	0.661888	7.02699e-08	1.75258e-07	154	P20851;P20851-2	C4BPB	C4b-binding protein beta chain;Isoform 2 of C4b-binding protein beta chain	C4BPB_HUMAN	1	58.2151	1.58215	Dengue	QC	NaN	NaN	NaN	115.133	0.106567
Dengue / QC	_APNHAVVTR_	P02787	0.890541	0.890541	7.07482e-08	1.76301e-07	136	P02787	TF	Serotransferrin	TRFE_HUMAN	1	85.3872	1.85387	Dengue	QC	NaN	NaN	NaN	87.6205	0.146885
Dengue / QC	_VLDAVRGSPAINVAVHVFRK_	P02766	1.07413	1.07413	7.19849e-08	1.79307e-07	64	P02766	TTR	Transthyretin	TTHY_HUMAN	1	110.545	2.10545	Dengue	QC	NaN	NaN	NaN	48.4365	0.183269
Dengue / QC	_SNRVTVFPIGIGDRYDAAQLR_	P04275	0.895723	0.895723	7.232e-08	1.7999e-07	94	P04275	VWF	von Willebrand factor	VWF_HUMAN	1	86.0542	1.86054	Dengue	QC	NaN	NaN	NaN	73.0886	0.202801
Dengue / QC	_LVTDLTKVHTEC[Carbamidomethyl (C)]C[Carbamidomethyl (C)]HGDLLEC[Carbamidomethyl (C)]ADDR_	P02768	1.07736	1.07736	7.29272e-08	1.81424e-07	140	P02768	ALB	Serum albumin	ALBU_HUMAN	1	111.017	2.11017	Dengue	QC	NaN	NaN	NaN	118.346	0.18429
Dengue / QC	_YDRLEIWDGFPDVGPHIGR_	E7EX60;E9PEP6;O14786;O14786-2;O14786-3;Q5JWQ6;Q5T7F0	0.733293	0.733293	7.35075e-08	1.82636e-07	32	E7EX60;E9PEP6;O14786;O14786-2;O14786-3;Q5JWQ6;Q5T7F0	NRP1	Neuropilin-1;Neuropilin;Neuropilin-1;Isoform 2 of Neuropilin-1;Isoform 3 of Neuropilin-1;Neuropilin;Neuropilin	E7EX60_HUMAN;E9PEP6_HUMAN;NRP1_HUMAN;NRP1_HUMAN;NRP1_HUMAN;Q5JWQ6_HUMAN;Q5T7F0_HUMAN	1	66.2429	1.66243	Dengue	QC	NaN	NaN	NaN	16.3337	0.200431
Dengue / QC	_IDSLLENDR_	P10909;P10909-2;P10909-4;P10909-5	0.489691	0.489691	7.42599e-08	1.8435e-07	78	P10909;P10909-2;P10909-4;P10909-5	CLU	Clusterin;Isoform 2 of Clusterin;Isoform 4 of Clusterin;Isoform 5 of Clusterin	CLUS_HUMAN	1	40.4144	1.40414	Dengue	QC	NaN	NaN	NaN	56.7041	0.0711921
Dengue / QC	_RNFGYTLR_	P05546	0.853726	0.853726	7.50899e-08	1.86175e-07	86	P05546	SERPIND1	Heparin cofactor 2	HEP2_HUMAN	1	80.7162	1.80716	Dengue	QC	NaN	NaN	NaN	42.4769	0.11343
Dengue / QC	_RPC[Carbamidomethyl (C)]FSALEVDETYVPKEFNAETFTFHADIC[Carbamidomethyl (C)]TLSEK_	P02768	0.546963	0.546963	7.60665e-08	1.88279e-07	164	P02768	ALB	Serum albumin	ALBU_HUMAN	1	46.1007	1.46101	Dengue	QC	NaN	NaN	NaN	86.6142	0.105823
Dengue / QC	_TLSPVLESPR_	A0A087X0I0;A0A140T8Y3;A0A140T8Z8;A0A140T9C0;A0A140T9L7;A0A140TA41;A0A140TA52;P22105;P22105-3;P22105-4	0.657902	0.657902	7.62948e-08	1.88765e-07	38	A0A087X0I0;A0A140T8Y3;A0A140T8Z8;A0A140T9C0;A0A140T9L7;A0A140TA41;A0A140TA52;P22105;P22105-3;P22105-4	TNXB	Tenascin-X;Tenascin-X;Tenascin-X (Fragment);Tenascin-X;Tenascin-X (Fragment);Tenascin-X;Tenascin-X;Tenascin-X;Isoform 4 of Tenascin-X;Isoform 5 of Tenascin-X	A0A087X0I0_HUMAN;A0A140T8Y3_HUMAN;A0A140T8Z8_HUMAN;A0A140T9C0_HUMAN;A0A140T9L7_HUMAN;A0A140TA41_HUMAN;A0A140TA52_HUMAN;TENX_HUMAN;TENX_HUMAN;TENX_HUMAN	1	57.7787	1.57779	Dengue	QC	NaN	NaN	NaN	26.6213	0.189167
Dengue / QC	_INENTGSVSVTR_	P55290;P55290-4	0.648097	0.648097	7.7528e-08	1.91413e-07	96	P55290;P55290-4	CDH13	Cadherin-13;Isoform 4 of Cadherin-13	CAD13_HUMAN	1	56.71	1.5671	Dengue	QC	NaN	NaN	NaN	34.798	0.166061
Dengue / QC	_VTITADESTSTAYMELSSLR_	A0A0B4J2H0	0.875065	0.875065	7.77079e-08	1.91777e-07	104	A0A0B4J2H0	IGHV1-69D	Immunoglobulin heavy variable 1-69D	HV69D_HUMAN	1	83.4091	1.83409	Dengue	QC	NaN	NaN	NaN	81.5953	0.133867
Dengue / QC	_YFKPGMPFDLMVFVTNPDGSPAYRVPVAVQGEDTVQSLTQGDGVAK_	P01024	0.606994	0.606994	7.97712e-08	1.96457e-07	176	P01024	C3	Complement C3	CO3_HUMAN	1	52.3082	1.52308	Dengue	QC	NaN	NaN	NaN	78.0248	0.0907097
Dengue / QC	_SLTLGIEPVSPTSLR_	Q6EMK4	0.505231	0.505231	8.0623e-08	1.98472e-07	116	Q6EMK4	VASN	Vasorin	VASN_HUMAN	1	41.9351	1.41935	Dengue	QC	NaN	NaN	NaN	102.68	0.0942235
Dengue / QC	_GPTQDFR_	P20742	4.13754	4.13754	8.22563e-08	2.02239e-07	28	P20742	PZP	Pregnancy zone protein	PZP_HUMAN	1	1660.05	17.6005	Dengue	QC	NaN	NaN	NaN	19.4377	0.52021
Dengue / QC	_TYTC[Carbamidomethyl (C)]NVDHKPSNTKVDK_	P01861	1.43948	1.43948	8.37777e-08	2.05551e-07	130	P01861	IGHG4	Immunoglobulin heavy constant gamma 4	IGHG4_HUMAN	1	171.224	2.71224	Dengue	QC	NaN	NaN	NaN	102.351	0.173629
Dengue / QC	_NELIPLIYLENPRR_	P20742	1.88389	1.88389	8.38837e-08	2.05725e-07	142	P20742	PZP	Pregnancy zone protein	PZP_HUMAN	1	269.068	3.69068	Dengue	QC	NaN	NaN	NaN	101.419	0.30874
Dengue / QC	_VNVDAVGGEALGR_	P02042	0.353168	0.353168	8.46752e-08	2.07579e-07	148	P02042	HBD	Hemoglobin subunit delta	HBD_HUMAN	1	27.7362	1.27736	Dengue	QC	NaN	NaN	NaN	133.603	0.0562344
Dengue / QC	_MKGLIDEVNQDFTNRINK_	P02671	2.53067	2.53067	8.4746e-08	2.07667e-07	28	P02671	FGA	Fibrinogen alpha chain	FIBA_HUMAN	1	477.841	5.77841	Dengue	QC	NaN	NaN	NaN	14.4136	0.216124
Dengue / QC	_SLHTLFGDK_	P02768	-0.41435	0.41435	8.62164e-08	2.11182e-07	176	P02768	ALB	Serum albumin	ALBU_HUMAN	1	-24.9642	0.750358	Dengue	QC	NaN	NaN	NaN	91.4002	0.0714032
Dengue / QC	_HQM[Oxidation (M)]DLVATLSQLGLQELFQAPDLR_	P08697	0.743746	0.743746	8.66922e-08	2.12259e-07	144	P08697	SERPINF2	Alpha-2-antiplasmin	A2AP_HUMAN	1	67.4518	1.67452	Dengue	QC	NaN	NaN	NaN	115.887	0.105224
Dengue / QC	_SM[Oxidation (M)]QGGLVGNDETVALTAFVTIALHHGLAVFQDEGAEPLKQR_	P0C0L5	2.2886	2.2886	8.67914e-08	2.12413e-07	28	P0C0L5	C4B	Complement C4-B	CO4B_HUMAN	1	388.582	4.88582	Dengue	QC	NaN	NaN	NaN	18.1283	0.192493
Dengue / QC	_EIPDEISILLLGVAHFK_	P36955	0.877345	0.877345	8.7315e-08	2.13606e-07	134	P36955	SERPINF1	Pigment epithelium-derived factor	PEDF_HUMAN	1	83.6991	1.83699	Dengue	QC	NaN	NaN	NaN	87.8644	0.110797
Dengue / QC	_SLGPNSC[Carbamidomethyl (C)]SANGPGLYLIHGPNLYC[Carbamidomethyl (C)]YSDVEK_	P02790	0.474919	0.474919	8.77596e-08	2.14605e-07	176	P02790	HPX	Hemopexin	HEMO_HUMAN	1	38.984	1.38984	Dengue	QC	NaN	NaN	NaN	101.752	0.0680091
Dengue / QC	_VAQVIIPSTYVPGTTNHDIALLR_	F5H8B0;P08709;P08709-2	0.682761	0.682761	8.82332e-08	2.15592e-07	112	F5H8B0;P08709;P08709-2	F7	Coagulation factor VII;Coagulation factor VII;Isoform B of Coagulation factor VII	F5H8B0_HUMAN;FA7_HUMAN;FA7_HUMAN	1	60.5209	1.60521	Dengue	QC	NaN	NaN	NaN	59.4894	0.109852
Dengue / QC	_AINEKLGQYASPTAK_	P0C0L5	3.87858	3.87858	8.82368e-08	2.15592e-07	42	P0C0L5	C4B	Complement C4-B	CO4B_HUMAN	1	1370.85	14.7085	Dengue	QC	NaN	NaN	NaN	21.5409	0.367219
Dengue / QC	_SGGRTEHPFTVEEFVLPK_	P01023	-0.424161	0.424161	8.89452e-08	2.17058e-07	176	P01023	A2M	Alpha-2-macroglobulin	A2MG_HUMAN	1	-25.4728	0.745272	Dengue	QC	NaN	NaN	NaN	70.3	0.0730631
Dengue / QC	_HQQTVTIPPKSSLSVPYVIVPLKTGLQEVEVK_	P01024	1.23381	1.23381	8.8984e-08	2.17058e-07	112	P01024	C3	Complement C3	CO3_HUMAN	1	135.188	2.35188	Dengue	QC	NaN	NaN	NaN	97.0044	0.175711
Dengue / QC	_EAC[Carbamidomethyl (C)]NAWLQKR_	Q9NZP8	2.00986	2.00986	9.03962e-08	2.20411e-07	40	Q9NZP8	C1RL	Complement C1r subcomponent-like protein	C1RL_HUMAN	1	302.744	4.02744	Dengue	QC	NaN	NaN	NaN	26.8203	0.351587
Dengue / QC	_GATDNKGPVLAWINAVSAFR_	Q96KN2	0.600837	0.600837	9.09877e-08	2.2167e-07	60	Q96KN2	CNDP1	Beta-Ala-His dipeptidase	CNDP1_HUMAN	1	51.6597	1.5166	Dengue	QC	NaN	NaN	NaN	48.7633	0.0970166
Dengue / QC	_LYIEYGIQR_	Q9NPH3-5	0.688275	0.688275	9.15966e-08	2.23061e-07	64	Q9NPH3-5	IL1RAP	Isoform 4 of Interleukin-1 receptor accessory protein	IL1AP_HUMAN	1	61.1355	1.61136	Dengue	QC	NaN	NaN	NaN	43.0773	0.131093
Dengue / QC	_LMIYEVSNRPSGVPDR_	A0A075B6J9	-0.501296	0.501296	9.22582e-08	2.24486e-07	114	A0A075B6J9	IGLV2-18	Immunoglobulin lambda variable 2-18	LV218_HUMAN	1	-29.3528	0.706472	Dengue	QC	NaN	NaN	NaN	96.8783	0.0968871
Dengue / QC	_GSVFLRNPSRNNVPC[Carbamidomethyl (C)]SPK_	P0C0L5	0.965853	0.965853	9.27612e-08	2.2543e-07	112	P0C0L5	C4B	Complement C4-B	CO4B_HUMAN	1	95.3217	1.95322	Dengue	QC	NaN	NaN	NaN	74.657	0.137916
Dengue / QC	_HRHPDEAAFFDTASTGK_	P02671	2.35237	2.35237	9.34786e-08	2.26987e-07	170	P02671	FGA	Fibrinogen alpha chain	FIBA_HUMAN	1	410.664	5.10664	Dengue	QC	NaN	NaN	NaN	138.63	0.351923
Dengue / QC	_SVQWC[Carbamidomethyl (C)]AVSQPEATK_	E7ER44;P02788	1.40959	1.40959	9.58281e-08	2.32404e-07	34	E7ER44;P02788	LTF	Lactotransferrin	E7ER44_HUMAN;TRFL_HUMAN	1	165.662	2.65662	Dengue	QC	NaN	NaN	NaN	24.6926	0.240483
Dengue / QC	_TSC[Carbamidomethyl (C)]LLFMGR_	P05546	0.428567	0.428567	9.74342e-08	2.36105e-07	126	P05546	SERPIND1	Heparin cofactor 2	HEP2_HUMAN	1	34.5896	1.3459	Dengue	QC	NaN	NaN	NaN	105.006	0.091227
Dengue / QC	_C[Carbamidomethyl (C)]C[Carbamidomethyl (C)]QDGVTRLPMMR_	P0C0L5	1.2882	1.2882	9.80217e-08	2.3743e-07	174	P0C0L5	C4B	Complement C4-B	CO4B_HUMAN	1	144.224	2.44224	Dengue	QC	NaN	NaN	NaN	138.728	0.199494
Dengue / QC	_VAAEDWKKGETFSC[Carbamidomethyl (C)]MVGHEALPLAFTQK_	A0A286YEY5;P01877	0.870706	0.870706	9.81981e-08	2.37662e-07	28	A0A286YEY5;P01877	IGHA2	Immunoglobulin heavy constant alpha 2 (Fragment);Immunoglobulin heavy constant alpha 2	A0A286YEY5_HUMAN;IGHA2_HUMAN	1	82.8557	1.82856	Dengue	QC	NaN	NaN	NaN	18.6098	0.375294
Dengue / QC	_SVDEALR_	P32119	1.32059	1.32059	9.90608e-08	2.39651e-07	100	P32119	PRDX2	Peroxiredoxin-2	PRDX2_HUMAN	1	149.769	2.49769	Dengue	QC	NaN	NaN	NaN	71.0706	0.138227
Dengue / QC	_LASQAC[Carbamidomethyl (C)]R_	P00748	2.13148	2.13148	1.00642e-07	2.43037e-07	30	P00748	F12	Coagulation factor XII	FA12_HUMAN	1	338.167	4.38167	Dengue	QC	NaN	NaN	NaN	19.2493	0.308308
Dengue / QC	_MYLGYEYVTAIRNLR_	P02787	2.35666	2.35666	1.00667e-07	2.43037e-07	66	P02787	TF	Serotransferrin	TRFE_HUMAN	1	412.183	5.12183	Dengue	QC	NaN	NaN	NaN	54.9953	0.253493
Dengue / QC	_AGFEWNEDGAGTTPSPGLQPAHLTFPLDYHLNQPFIFVLR_	P36955	0.755254	0.755254	1.00996e-07	2.43732e-07	76	P36955	SERPINF1	Pigment epithelium-derived factor	PEDF_HUMAN	1	68.7928	1.68793	Dengue	QC	NaN	NaN	NaN	65.1876	0.14591
Dengue / QC	_YWC[Carbamidomethyl (C)]NDGKTPGAVNAC[Carbamidomethyl (C)]HLSC[Carbamidomethyl (C)]SALLQDNIADAVAC[Carbamidomethyl (C)]AK_	P61626	0.734197	0.734197	1.06e-07	2.54971e-07	32	P61626	LYZ	Lysozyme C	LYSC_HUMAN	1	66.3472	1.66347	Dengue	QC	NaN	NaN	NaN	23.5716	0.165805
Dengue / QC	_SGYLLHGSNEITC[Carbamidomethyl (C)]NR_	P05160	0.341086	0.341086	1.07388e-07	2.57888e-07	168	P05160	F13B	Coagulation factor XIII B chain	F13B_HUMAN	1	26.671	1.26671	Dengue	QC	NaN	NaN	NaN	126.32	0.0705418
Dengue / QC	_SQFVQPIC[Carbamidomethyl (C)]LPEPGSTFPAGHK_	Q04756	0.300405	0.300405	1.07777e-07	2.58718e-07	116	Q04756	HGFAC	Hepatocyte growth factor activator	HGFA_HUMAN	1	23.149	1.23149	Dengue	QC	NaN	NaN	NaN	101.103	0.0757094
Dengue / QC	_IEGSNKVPVDPATYGQFYGGDSYIILYNYR_	P06396	0.726064	0.726064	1.11193e-07	2.66375e-07	162	P06396	GSN	Gelsolin	GELS_HUMAN	1	65.4121	1.65412	Dengue	QC	NaN	NaN	NaN	71.3749	0.0970079
Dengue / QC	_LVNIAVDER_	A0A0C4DFP6;Q9NQ79;Q9NQ79-2	0.540091	0.540091	1.14306e-07	2.73388e-07	118	A0A0C4DFP6;Q9NQ79;Q9NQ79-2	CRTAC1	Cartilage acidic protein 1;Cartilage acidic protein 1;Isoform 2 of Cartilage acidic protein 1	A0A0C4DFP6_HUMAN;CRAC1_HUMAN;CRAC1_HUMAN	1	45.4065	1.45406	Dengue	QC	NaN	NaN	NaN	63.0146	0.105383
Dengue / QC	_FGFC[Carbamidomethyl (C)]PM[Oxidation (M)]AAHEEIC[Carbamidomethyl (C)]TTNEGVMYR_	P02751;P02751-15;P02751-3;P02751-7	2.20829	2.20829	1.14481e-07	2.73695e-07	40	P02751;P02751-15;P02751-3;P02751-7	FN1	Fibronectin;Isoform 15 of Fibronectin;Isoform 3 of Fibronectin;Isoform 7 of Fibronectin	FINC_HUMAN	1	362.128	4.62128	Dengue	QC	NaN	NaN	NaN	28.5052	0.255447
Dengue / QC	_WDEELAAFAK_	Q6UXB8;Q6UXB8-2	0.626622	0.626622	1.14978e-07	2.74659e-07	54	Q6UXB8;Q6UXB8-2	PI16	Peptidase inhibitor 16;Isoform 2 of Peptidase inhibitor 16	PI16_HUMAN	1	54.3946	1.54395	Dengue	QC	NaN	NaN	NaN	47.4874	0.115751
Dengue / QC	_FKDLGEENFKALVLIAFAQYLQQC[Carbamidomethyl (C)]PFEDHVK_	P02768	0.736767	0.736767	1.15683e-07	2.762e-07	176	P02768	ALB	Serum albumin	ALBU_HUMAN	1	66.6438	1.66644	Dengue	QC	NaN	NaN	NaN	133.551	0.104135
Dengue / QC	_C[Carbamidomethyl (C)]PFPSRPDNGFVNYPAKPTLYYK_	P02749	0.336816	0.336816	1.15717e-07	2.762e-07	160	P02749	APOH	Beta-2-glycoprotein 1	APOH_HUMAN	1	26.2966	1.26297	Dengue	QC	NaN	NaN	NaN	92.9743	0.0572138
Dengue / QC	_ESGPVLVKPTETLTLTC[Carbamidomethyl (C)]TVSGFSLSNAR_	A0A0B4J1V2	0.877309	0.877309	1.19731e-07	2.85319e-07	80	A0A0B4J1V2	IGHV2-26	Immunoglobulin heavy variable 2-26	HV226_HUMAN	1	83.6946	1.83695	Dengue	QC	NaN	NaN	NaN	66.144	0.166857
Dengue / QC	_EVKIDGQFR_	P04114	0.821492	0.821492	1.20988e-07	2.87731e-07	32	P04114	APOB	Apolipoprotein B-100	APOB_HUMAN	1	76.7233	1.76723	Dengue	QC	NaN	NaN	NaN	19.5046	0.222739
Dengue / QC	_GLASANVDFAFSLYKHLVALSPKK_	P08185	0.574412	0.574412	1.21676e-07	2.88669e-07	124	P08185	SERPINA6	Corticosteroid-binding globulin	CBG_HUMAN	1	48.907	1.48907	Dengue	QC	NaN	NaN	NaN	85.8042	0.111592
Dengue / QC	_EPQVYTLPPSREEM[Oxidation (M)]TK_	P01860	-0.659752	0.659752	1.22643e-07	2.907e-07	176	P01860	IGHG3	Immunoglobulin heavy constant gamma 3	IGHG3_HUMAN	1	-36.7013	0.632987	Dengue	QC	NaN	NaN	NaN	67.9082	0.112636
Dengue / QC	_DIFTGLIGPM[Oxidation (M)]K_	P00450	1.03602	1.03602	1.22819e-07	2.90911e-07	34	P00450	CP	Ceruloplasmin	CERU_HUMAN	1	105.057	2.05057	Dengue	QC	NaN	NaN	NaN	23.5697	0.147492
Dengue / QC	_IPC[Carbamidomethyl (C)]FLAGDTR_	P05164;P05164-2;P05164-3	1.9725	1.9725	1.26462e-07	2.98579e-07	22	P05164;P05164-2;P05164-3	MPO	Myeloperoxidase;Isoform H14 of Myeloperoxidase;Isoform H7 of Myeloperoxidase	PERM_HUMAN	1	292.447	3.92447	Dengue	QC	NaN	NaN	NaN	16.215	0.191371
Dengue / QC	_LNM[Oxidation (M)]GITDLQGLR_	P0C0L5	0.528705	0.528705	1.27034e-07	2.99689e-07	62	P0C0L5	C4B	Complement C4-B	CO4B_HUMAN	1	44.2634	1.44263	Dengue	QC	NaN	NaN	NaN	52.6628	0.0957681
Dengue / QC	_TLSDVLQYVK_	P48740-2	0.790419	0.790419	1.3046e-07	3.07033e-07	38	P48740-2	MASP1	Isoform 2 of Mannan-binding lectin serine protease 1	MASP1_HUMAN	1	72.9577	1.72958	Dengue	QC	NaN	NaN	NaN	16.9949	0.123645
Dengue / QC	_NTDNIIYPEEYSSC[Carbamidomethyl (C)]SR_	Q13201	0.719875	0.719875	1.35778e-07	3.18657e-07	26	Q13201	MMRN1	Multimerin-1	MMRN1_HUMAN	1	64.7039	1.64704	Dengue	QC	NaN	NaN	NaN	8.39671	0.352949
Dengue / QC	_RLGVYELLLK_	Q14624	1.03323	1.03323	1.36176e-07	3.19186e-07	18	Q14624	ITIH4	Inter-alpha-trypsin inhibitor heavy chain H4	ITIH4_HUMAN	1	104.661	2.04661	Dengue	QC	NaN	NaN	NaN	12.5321	0.107606
Dengue / QC	_GNPAVSYVR_	Q9Y6R7	1.05308	1.05308	1.40549e-07	3.28543e-07	92	Q9Y6R7	FCGBP	IgGFc-binding protein	FCGBP_HUMAN	1	107.495	2.07495	Dengue	QC	NaN	NaN	NaN	79.8172	0.207288
Dengue / QC	_AVNRADTAKEVSFDVELPK_	Q06033;Q06033-2	1.0666	1.0666	1.42099e-07	3.31771e-07	100	Q06033;Q06033-2	ITIH3	Inter-alpha-trypsin inhibitor heavy chain H3;Isoform 2 of Inter-alpha-trypsin inhibitor heavy chain H3	ITIH3_HUMAN	1	109.45	2.0945	Dengue	QC	NaN	NaN	NaN	84.922	0.160655
Dengue / QC	_C[Carbamidomethyl (C)]LPTAC[Carbamidomethyl (C)]TIQLR_	P04275	1.29164	1.29164	1.42067e-07	3.31771e-07	44	P04275	VWF	von Willebrand factor	VWF_HUMAN	1	144.807	2.44807	Dengue	QC	NaN	NaN	NaN	19.3228	0.18173
Dengue / QC	_YASQSFSGVPSR_	A0A0C4DH24	-0.735224	0.735224	1.44769e-07	3.37603e-07	146	A0A0C4DH24	IGKV6-21	Immunoglobulin kappa variable 6-21	KV621_HUMAN	1	-39.9275	0.600725	Dengue	QC	NaN	NaN	NaN	102.937	0.126023
Dengue / QC	_YYWGGQYTWDMAK_	P02675	2.84913	2.84913	1.47594e-07	3.43374e-07	102	P02675	FGB	Fibrinogen beta chain	FIBB_HUMAN	1	620.563	7.20563	Dengue	QC	NaN	NaN	NaN	77.1696	0.395419
Dengue / QC	_S[Acetyl (Protein N-term)]DKPDM[Oxidation (M)]AEIEKFDK_	P62328	2.1991	2.1991	1.4806e-07	3.44323e-07	34	P62328	TMSB4X	Thymosin beta-4	TYB4_HUMAN	1	359.194	4.59194	Dengue	QC	NaN	NaN	NaN	27.046	0.324676
Dengue / QC	_VLAPATFYAIC[Carbamidomethyl (C)]QQDSC[Carbamidomethyl (C)]HQEQVC[Carbamidomethyl (C)]EVIASYAHLC[Carbamidomethyl (C)]R_	P04275	1.53864	1.53864	1.48924e-07	3.45921e-07	52	P04275	VWF	von Willebrand factor	VWF_HUMAN	1	190.52	2.9052	Dengue	QC	NaN	NaN	NaN	41.5913	0.205379
Dengue / QC	_FSC[Carbamidomethyl (C)]FQEEAPQPHYQLR_	Q16610	1.01714	1.01714	1.49699e-07	3.47448e-07	164	Q16610	ECM1	Extracellular matrix protein 1	ECM1_HUMAN	1	102.39	2.0239	Dengue	QC	NaN	NaN	NaN	147.741	0.151583
Dengue / QC	_EC[Carbamidomethyl (C)]ELPKIDVHLVPDRK_	P08603	1.90031	1.90031	1.51308e-07	3.50491e-07	22	P08603	CFH	Complement factor H	CFAH_HUMAN	1	273.294	3.73294	Dengue	QC	NaN	NaN	NaN	13.2434	0.25691
Dengue / QC	_QAPGQELGWM[Oxidation (M)]GR_	A0A075B7D0	0.607788	0.607788	1.51726e-07	3.51184e-07	94	A0A075B7D0	IGHV1OR15-1	Immunoglobulin heavy variable 1/OR15-1 (non-functional) (Fragment)	A0A075B7D0_HUMAN	1	52.3921	1.52392	Dengue	QC	NaN	NaN	NaN	72.8787	0.107887
Dengue / QC	_NPDPVAAPYC[Carbamidomethyl (C)]YTR_	P08519	1.30226	1.30226	1.52203e-07	3.52148e-07	102	P08519	LPA	Apolipoprotein(a)	APOA_HUMAN	1	146.615	2.46615	Dengue	QC	NaN	NaN	NaN	71.3519	0.190777
Dengue / QC	_SPLFMGK_	P01009	-0.349674	0.349674	1.56101e-07	3.60318e-07	176	P01009	SERPINA1	Alpha-1-antitrypsin	A1AT_HUMAN	1	-21.5239	0.784761	Dengue	QC	NaN	NaN	NaN	89.6877	0.0631414
Dengue / QC	_SLNPNRVTFK_	P01008	1.00418	1.00418	1.58685e-07	3.65708e-07	168	P01008	SERPINC1	Antithrombin-III	ANT3_HUMAN	1	100.58	2.0058	Dengue	QC	NaN	NaN	NaN	151.382	0.162965
Dengue / QC	_C[Carbamidomethyl (C)]VNSPGSFR_	P23142	1.17241	1.17241	1.59073e-07	3.6603e-07	64	P23142	FBLN1	Fibulin-1	FBLN1_HUMAN	1	125.388	2.25388	Dengue	QC	NaN	NaN	NaN	54.8883	0.19926
Dengue / QC	_HRGVYSSDVFDIFPGTYQTLEMFPR_	P00450	0.790565	0.790565	1.5907e-07	3.6603e-07	174	P00450	CP	Ceruloplasmin	CERU_HUMAN	1	72.9752	1.72975	Dengue	QC	NaN	NaN	NaN	151.251	0.108096
Dengue / QC	_LFAC[Carbamidomethyl (C)]SNK_	P06396	0.65432	0.65432	1.59002e-07	3.6603e-07	118	P06396	GSN	Gelsolin	GELS_HUMAN	1	57.3874	1.57387	Dengue	QC	NaN	NaN	NaN	112.742	0.121316
Dengue / QC	_GGVASGFKHVVPNEVVVQR_	P06396	1.02099	1.02099	1.5938e-07	3.66592e-07	72	P06396	GSN	Gelsolin	GELS_HUMAN	1	102.931	2.02931	Dengue	QC	NaN	NaN	NaN	44.3153	0.219777
Dengue / QC	_EALQGVGDM[Oxidation (M)]GR_	A0A096LPE2	0.651569	0.651569	1.59537e-07	3.66694e-07	74	A0A096LPE2	SAA2-SAA4	SAA2-SAA4 readthrough	A0A096LPE2_HUMAN	1	57.0876	1.57088	Dengue	QC	NaN	NaN	NaN	41.4177	0.117296
Dengue / QC	_ANRPFLVFIREVPLNTIIFMGR_	P01008	1.00544	1.00544	1.59549e-07	3.66694e-07	174	P01008	SERPINC1	Antithrombin-III	ANT3_HUMAN	1	100.756	2.00756	Dengue	QC	NaN	NaN	NaN	59.5277	0.129453
Dengue / QC	_EPQVYTLPPSRDELTKNQVSLTC[Carbamidomethyl (C)]LVK_	P01857	1.36818	1.36818	1.60677e-07	3.69e-07	100	P01857	IGHG1	Immunoglobulin heavy constant gamma 1	IGHG1_HUMAN	1	158.145	2.58145	Dengue	QC	NaN	NaN	NaN	90.0253	0.260204
Dengue / QC	_FC[Carbamidomethyl (C)]PFAER_	P78417;P78417-2;P78417-3;Q5TA01;Q5TA02	1.33968	1.33968	1.62686e-07	3.72885e-07	28	P78417;P78417-2;P78417-3;Q5TA01;Q5TA02	GSTO1	Glutathione S-transferase omega-1;Isoform 2 of Glutathione S-transferase omega-1;Isoform 3 of Glutathione S-transferase omega-1;Glutathione S-transferase omega-1 (Fragment);Glutathione S-transferase omega-1 (Fragment)	GSTO1_HUMAN;GSTO1_HUMAN;GSTO1_HUMAN;Q5TA01_HUMAN;Q5TA02_HUMAN	1	153.094	2.53094	Dengue	QC	NaN	NaN	NaN	14.6503	0.170251
Dengue / QC	_TFPGFFSPMLGEFVSETESR_	P02671	1.98475	1.98475	1.79938e-07	4.09398e-07	176	P02671	FGA	Fibrinogen alpha chain	FIBA_HUMAN	1	295.795	3.95795	Dengue	QC	NaN	NaN	NaN	138.986	0.364735
Dengue / QC	_NANFKFTDHLK_	P00738	2.62829	2.62829	1.80118e-07	4.0965e-07	82	P00738	HP	Haptoglobin	HPT_HUMAN	1	518.294	6.18294	Dengue	QC	NaN	NaN	NaN	50.8569	0.349931
Dengue / QC	_HC[Carbamidomethyl (C)]LVTVEK_	P07225	0.618382	0.618382	1.80202e-07	4.09683e-07	74	P07225	PROS1	Vitamin K-dependent protein S	PROS_HUMAN	1	53.5153	1.53515	Dengue	QC	NaN	NaN	NaN	66.9444	0.0903676
Dengue / QC	_TVGSDTFYSFKYEIKEGDC[Carbamidomethyl (C)]PVQSGK_	P01042	0.872194	0.872194	1.80687e-07	4.10628e-07	86	P01042	KNG1	Kininogen-1	KNG1_HUMAN	1	83.0445	1.83044	Dengue	QC	NaN	NaN	NaN	75.2978	0.140739
Dengue / QC	_SIYGEKFEDENFILK_	P62937	0.974316	0.974316	1.82763e-07	4.14705e-07	26	P62937	PPIA	Peptidyl-prolyl cis-trans isomerase A	PPIA_HUMAN	1	96.471	1.96471	Dengue	QC	NaN	NaN	NaN	20.5756	0.11141
Dengue / QC	_ILDELLQTC[Carbamidomethyl (C)]VDPEDC[Carbamidomethyl (C)]PVC[Carbamidomethyl (C)]EVAGR_	P04275	2.21962	2.21962	1.91394e-07	4.32288e-07	34	P04275	VWF	von Willebrand factor	VWF_HUMAN	1	365.772	4.65772	Dengue	QC	NaN	NaN	NaN	21.7098	0.288841
Dengue / QC	_C[Carbamidomethyl (C)]C[Carbamidomethyl (C)]EDGMR_	P01024	0.676708	0.676708	1.92257e-07	4.34071e-07	150	P01024	C3	Complement C3	CO3_HUMAN	1	59.8488	1.59849	Dengue	QC	NaN	NaN	NaN	51.4753	0.10981
Dengue / QC	_TTPPVLDSDGSFFLYSKLTVDK_	P01857	0.561502	0.561502	1.93901e-07	4.37615e-07	96	P01857	IGHG1	Immunoglobulin heavy constant gamma 1	IGHG1_HUMAN	1	47.5804	1.4758	Dengue	QC	NaN	NaN	NaN	89.4687	0.0877675
Dengue / QC	_ETEGLRQEMSK_	P02647	0.846742	0.846742	1.94642e-07	4.39121e-07	56	P02647	APOA1	Apolipoprotein A-I	APOA1_HUMAN	1	79.8435	1.79843	Dengue	QC	NaN	NaN	NaN	39.4139	0.149789
Dengue / QC	_AEFAEVSK_	P02768	-0.294792	0.294792	1.98201e-07	4.45441e-07	176	P02768	ALB	Serum albumin	ALBU_HUMAN	1	-18.481	0.81519	Dengue	QC	NaN	NaN	NaN	69.3635	0.0579392
Dengue / QC	_LKFIIPSPK_	P04114	0.354949	0.354949	1.9887e-07	4.46605e-07	54	P04114	APOB	Apolipoprotein B-100	APOB_HUMAN	1	27.8941	1.27894	Dengue	QC	NaN	NaN	NaN	34.7066	0.0863107
Dengue / QC	_LGPNYLHIPVNC[Carbamidomethyl (C)]PYR_	P04040	1.25613	1.25613	2.02391e-07	4.53819e-07	52	P04040	CAT	Catalase	CATA_HUMAN	1	138.854	2.38854	Dengue	QC	NaN	NaN	NaN	26.3869	0.178265
Dengue / QC	_LVDEDMNSFK_	Q06033;Q06033-2	-0.445462	0.445462	2.03799e-07	4.56628e-07	168	Q06033;Q06033-2	ITIH3	Inter-alpha-trypsin inhibitor heavy chain H3;Isoform 2 of Inter-alpha-trypsin inhibitor heavy chain H3	ITIH3_HUMAN	1	-26.5651	0.734349	Dengue	QC	NaN	NaN	NaN	65.8722	0.0750932
Dengue / QC	_IGLDLPALNMQR_	P05164;P05164-2;P05164-3	1.05074	1.05074	2.07262e-07	4.63681e-07	52	P05164;P05164-2;P05164-3	MPO	Myeloperoxidase;Isoform H14 of Myeloperoxidase;Isoform H7 of Myeloperoxidase	PERM_HUMAN	1	107.16	2.0716	Dengue	QC	NaN	NaN	NaN	37.2774	0.19851
Dengue / QC	_A[Acetyl (Protein N-term)]NRGPAYGLSR_	P37802;X6RJP6	2.24442	2.24442	2.10513e-07	4.70239e-07	22	P37802;X6RJP6	TAGLN2	Transgelin-2;Transgelin-2 (Fragment)	TAGL2_HUMAN;X6RJP6_HUMAN	1	373.848	4.73848	Dengue	QC	NaN	NaN	NaN	15.6368	0.281306
Dengue / QC	_LEPGKEYLIMGLDGATYDLEGHPQYLLDSNSWIEEMPSER_	P0C0L5	1.47113	1.47113	2.1135e-07	4.71929e-07	64	P0C0L5	C4B	Complement C4-B	CO4B_HUMAN	1	177.239	2.77239	Dengue	QC	NaN	NaN	NaN	17.2553	0.183117
Dengue / QC	_RPVKLLSGGNTLHLVSTTK_	P04114	0.829784	0.829784	2.11663e-07	4.72269e-07	84	P04114	APOB	Apolipoprotein B-100	APOB_HUMAN	1	77.7419	1.77742	Dengue	QC	NaN	NaN	NaN	69.2237	0.155157
Dengue / QC	_LGNGVQC[Carbamidomethyl (C)]LAMGWGLLGR_	P08246	2.87728	2.87728	2.12008e-07	4.72697e-07	16	P08246	ELANE	Neutrophil elastase	ELNE_HUMAN	1	634.761	7.34761	Dengue	QC	NaN	NaN	NaN	5.95702	0.196943
Dengue / QC	_ALNSIIDVYHK_	P05109	2.27735	2.27735	2.13227e-07	4.75039e-07	22	P05109	S100A8	Protein S100-A8	S10A8_HUMAN	1	384.786	4.84786	Dengue	QC	NaN	NaN	NaN	12.3124	0.185611
Dengue / QC	_C[Carbamidomethyl (C)]YFPYLENGYNQNYGR_	P08603	0.520572	0.520572	2.20109e-07	4.89815e-07	94	P08603	CFH	Complement factor H	CFAH_HUMAN	1	43.4524	1.43452	Dengue	QC	NaN	NaN	NaN	41.4755	0.0790511
Dengue / QC	_LVNGQSHISLSKAEFQDALEKLNM[Oxidation (M)]GITDLQGLR_	P0C0L5	0.901008	0.901008	2.22243e-07	4.93817e-07	130	P0C0L5	C4B	Complement C4-B	CO4B_HUMAN	1	86.737	1.86737	Dengue	QC	NaN	NaN	NaN	76.6335	0.182759
Dengue / QC	_IMADSGPIYDK_	P07996	1.15536	1.15536	2.22825e-07	4.9455e-07	38	P07996	THBS1	Thrombospondin-1	TSP1_HUMAN	1	122.74	2.2274	Dengue	QC	NaN	NaN	NaN	15.0655	0.130906
Dengue / QC	_IEDLPTMVTLGNSFLHK_	P04275	0.517044	0.517044	2.23012e-07	4.94592e-07	118	P04275	VWF	von Willebrand factor	VWF_HUMAN	1	43.102	1.43102	Dengue	QC	NaN	NaN	NaN	109.988	0.112465
Dengue / QC	_QAAGSGHLLALGTPENPSWLSLHLQDQK_	I3L145;P04278	0.654515	0.654515	2.23915e-07	4.96409e-07	56	I3L145;P04278	SHBG	Sex hormone-binding globulin	I3L145_HUMAN;SHBG_HUMAN	1	57.4087	1.57409	Dengue	QC	NaN	NaN	NaN	27.5552	0.171185
Dengue / QC	_AWGESTPLANKPGK_	A0A0A0MRJ7;P12259	0.484042	0.484042	2.25105e-07	4.9867e-07	98	A0A0A0MRJ7;P12259	F5	Coagulation factor V	A0A0A0MRJ7_HUMAN;FA5_HUMAN	1	39.8657	1.39866	Dengue	QC	NaN	NaN	NaN	55.2931	0.121301
Dengue / QC	_LEAGINQLSFPLSSEPIQGSYR_	P20742	2.32592	2.32592	2.29142e-07	5.07422e-07	62	P20742	PZP	Pregnancy zone protein	PZP_HUMAN	1	401.385	5.01385	Dengue	QC	NaN	NaN	NaN	44.3705	0.370066
Dengue / QC	_FSGVPDRFSGSGSGTDFTLK_	A0A075B6S2;A2NJV5	0.636024	0.636024	2.30237e-07	5.09657e-07	154	A0A075B6S2;A2NJV5	IGKV2D-29;IGKV2-29	Immunoglobulin kappa variable 2D-29;Immunoglobulin kappa variable 2-29	KVD29_HUMAN;KV229_HUMAN	1	55.404	1.55404	Dengue	QC	NaN	NaN	NaN	136.209	0.109502
Dengue / QC	_AAFT[Hex]EC[Carbamidomethyl (C)]C[Carbamidomethyl (C)]QAADKAAC[Carbamidomethyl (C)]LLPK_	P02768	-0.0975287	0.0975287	2.30694e-07	5.10146e-07	138	P02768	ALB	Serum albumin	ALBU_HUMAN	1	-6.53674	0.934633	Dengue	QC	NaN	NaN	NaN	71.7593	0.203256
Dengue / QC	_GGEGTGYFVDFSVR_	P04196	0.39511	0.39511	2.30718e-07	5.10146e-07	176	P04196	HRG	Histidine-rich glycoprotein	HRG_HUMAN	1	31.5043	1.31504	Dengue	QC	NaN	NaN	NaN	133.765	0.0733205
Dengue / QC	_EEAPSLRPAPPPISGGGYR_	P02675	2.4495	2.4495	2.3424e-07	5.16962e-07	120	P02675	FGB	Fibrinogen beta chain	FIBB_HUMAN	1	446.228	5.46228	Dengue	QC	NaN	NaN	NaN	102.82	0.386293
Dengue / QC	_AVSM[Oxidation (M)]PSFSILGSDVR_	P04114	0.661103	0.661103	2.38425e-07	5.25803e-07	30	P04114	APOB	Apolipoprotein B-100	APOB_HUMAN	1	58.1291	1.58129	Dengue	QC	NaN	NaN	NaN	15.0792	0.0965864
Dengue / QC	_NTLYLQM[Oxidation (M)]NSLR_	A0A0J9YVT0;P0DP02	-0.522979	0.522979	2.41298e-07	5.31342e-07	154	A0A0J9YVT0;P0DP02	IGHV3-33;IGHV3-30-3	Immunoglobulin heavy variable 3-33 (Fragment);Immunoglobulin heavy variable 3-30-3	A0A0J9YVT0_HUMAN;HVC33_HUMAN	1	-30.4067	0.695933	Dengue	QC	NaN	NaN	NaN	62.3468	0.095927
Dengue / QC	_STDTSC[Carbamidomethyl (C)]VNPPTVQNAHILSR_	Q03591	0.913819	0.913819	2.4121e-07	5.31342e-07	100	Q03591	CFHR1	Complement factor H-related protein 1	FHR1_HUMAN	1	88.4026	1.88403	Dengue	QC	NaN	NaN	NaN	68.0366	0.141168
Dengue / QC	_FSGSGSGTDFTLTISSLEPEDFAVYYC[Carbamidomethyl (C)]QQR_	P04433	1.24552	1.24552	2.45766e-07	5.39971e-07	42	P04433	IGKV3-11	Immunoglobulin kappa variable 3-11	KV311_HUMAN	1	137.104	2.37104	Dengue	QC	NaN	NaN	NaN	26.0394	0.172045
Dengue / QC	_LSGALHVYSLGSD_	P80108	0.867873	0.867873	2.5246e-07	5.53851e-07	48	P80108	GPLD1	Phosphatidylinositol-glycan-specific phospholipase D	PHLD_HUMAN	1	82.4971	1.82497	Dengue	QC	NaN	NaN	NaN	29.0785	0.106018
Dengue / QC	_RLAVYQAGAR_	P02649	1.32795	1.32795	2.58609e-07	5.65442e-07	46	P02649	APOE	Apolipoprotein E	APOE_HUMAN	1	151.046	2.51046	Dengue	QC	NaN	NaN	NaN	36.209	0.194124
Dengue / QC	_TTEYYPNGGLTR_	P08519	1.90884	1.90884	2.59208e-07	5.66543e-07	114	P08519	LPA	Apolipoprotein(a)	APOA_HUMAN	1	275.506	3.75506	Dengue	QC	NaN	NaN	NaN	92.0439	0.258554
Dengue / QC	_YELDKAFSDRNTLIIYLDK_	P01024	0.887155	0.887155	2.63571e-07	5.75223e-07	54	P01024	C3	Complement C3	CO3_HUMAN	1	84.9526	1.84953	Dengue	QC	NaN	NaN	NaN	25.2379	0.119337
Dengue / QC	_VVSVDENFRPR_	P20742	2.65212	2.65212	2.6809e-07	5.84437e-07	78	P20742	PZP	Pregnancy zone protein	PZP_HUMAN	1	528.592	6.28592	Dengue	QC	NaN	NaN	NaN	56.2575	0.418981
Dengue / QC	_GFNC[Carbamidomethyl (C)]ESKPEAEETC[Carbamidomethyl (C)]FDK_	P02751;P02751-15;P02751-3;P02751-7	1.16425	1.16425	2.68464e-07	5.85035e-07	66	P02751;P02751-15;P02751-3;P02751-7	FN1	Fibronectin;Isoform 15 of Fibronectin;Isoform 3 of Fibronectin;Isoform 7 of Fibronectin	FINC_HUMAN	1	124.117	2.24117	Dengue	QC	NaN	NaN	NaN	56.0845	0.157059
Dengue / QC	_IRITDNMFC[Carbamidomethyl (C)]AGYKPDEGK_	P00734	0.73732	0.73732	2.69388e-07	5.86831e-07	92	P00734	F2	Prothrombin	THRB_HUMAN	1	66.7076	1.66708	Dengue	QC	NaN	NaN	NaN	80.554	0.121195
Dengue / QC	_VVSVLTVLHQDWLNGKEYKC[Carbamidomethyl (C)]K_	P01857	3.51086	3.51086	2.7654e-07	6.01457e-07	18	P01857	IGHG1	Immunoglobulin heavy constant gamma 1	IGHG1_HUMAN	1	1039.92	11.3992	Dengue	QC	NaN	NaN	NaN	10.2819	0.230064
Dengue / QC	_WYQMGIVSWGEGC[Carbamidomethyl (C)]DRDGK_	P00734	0.516149	0.516149	2.76613e-07	6.01457e-07	36	P00734	F2	Prothrombin	THRB_HUMAN	1	43.0133	1.43013	Dengue	QC	NaN	NaN	NaN	24.4153	0.0755025
Dengue / QC	_YVLSPYKLNLVATPLFLKPGIPYPIK_	P01031	0.545655	0.545655	2.84705e-07	6.17455e-07	68	P01031	C5	Complement C5	CO5_HUMAN	1	45.9683	1.45968	Dengue	QC	NaN	NaN	NaN	40.5303	0.122069
Dengue / QC	_MFPGVPLDTHDVFQYR_	P14780	2.42253	2.42253	2.86883e-07	6.2172e-07	18	P14780	MMP9	Matrix metalloproteinase-9	MMP9_HUMAN	1	436.109	5.36109	Dengue	QC	NaN	NaN	NaN	8.81716	0.290166
Dengue / QC	_LLGMETMAWQEIR_	B4E1Z4	0.707724	0.707724	2.91122e-07	6.3021e-07	68	B4E1Z4	NaN	cDNA FLJ55673, highly similar to Complement factor B (EC 3.4.21.47)	B4E1Z4_HUMAN	1	63.3225	1.63323	Dengue	QC	NaN	NaN	NaN	58.0586	0.125335
Dengue / QC	_VAAEDWKKGDTFSC[Carbamidomethyl (C)]M[Oxidation (M)]VGHEALPLAFTQK_	A0A0G2JMB2	0.921503	0.921503	2.92434e-07	6.32586e-07	82	A0A0G2JMB2	IGHA2	Immunoglobulin heavy constant alpha 2 (Fragment)	A0A0G2JMB2_HUMAN	1	89.4087	1.89409	Dengue	QC	NaN	NaN	NaN	61.2433	0.270344
Dengue / QC	_FSGSGAGTDFTLK_	A0A0C4DH68	-0.516291	0.516291	2.96374e-07	6.40402e-07	174	A0A0C4DH68	IGKV2-24	Immunoglobulin kappa variable 2-24	KV224_HUMAN	1	-30.0833	0.699167	Dengue	QC	NaN	NaN	NaN	89.8452	0.0796133
Dengue / QC	_GLLSGWAR_	P22891;P22891-2	0.474015	0.474015	2.99043e-07	6.45933e-07	158	P22891;P22891-2	PROZ	Vitamin K-dependent protein Z;Isoform 2 of Vitamin K-dependent protein Z	PROZ_HUMAN	1	38.8969	1.38897	Dengue	QC	NaN	NaN	NaN	62.5649	0.106301
Dengue / QC	_DSDWPFC[Carbamidomethyl (C)]SDEDWNYK_	P02671	2.23339	2.23339	2.99965e-07	6.47687e-07	40	P02671	FGA	Fibrinogen alpha chain	FIBA_HUMAN	1	370.236	4.70236	Dengue	QC	NaN	NaN	NaN	23.9499	0.261693
Dengue / QC	_WDRELISER_	P02790	0.498849	0.498849	3.01518e-07	6.50802e-07	124	P02790	HPX	Hemopexin	HEMO_HUMAN	1	41.3086	1.41309	Dengue	QC	NaN	NaN	NaN	50.152	0.0925128
Dengue / QC	_ALWEKPFISSR_	P29622	0.27547	0.27547	3.12831e-07	6.72998e-07	86	P29622	SERPINA4	Kallistatin	KAIN_HUMAN	1	21.0389	1.21039	Dengue	QC	NaN	NaN	NaN	49.6484	0.0777308
Dengue / QC	_EEM[Oxidation (M)]TKNQVSLTC[Carbamidomethyl (C)]LVK_	P01860	2.35011	2.35011	3.1389e-07	6.75029e-07	122	P01860	IGHG3	Immunoglobulin heavy constant gamma 3	IGHG3_HUMAN	1	409.862	5.09862	Dengue	QC	NaN	NaN	NaN	78.8592	0.271625
Dengue / QC	_LPGDIQVVPIGVGPNANVQELER_	P04275	0.699227	0.699227	3.15452e-07	6.774e-07	106	P04275	VWF	von Willebrand factor	VWF_HUMAN	1	62.3635	1.62363	Dengue	QC	NaN	NaN	NaN	100.092	0.130861
Dengue / QC	_VFDEFK[Hex(2)]PLVEEPQNLIKQNC[Carbamidomethyl (C)]ELFEQLGEYK_	P02768	1.68252	1.68252	3.21331e-07	6.89017e-07	16	P02768	ALB	Serum albumin	ALBU_HUMAN	1	220.987	3.20987	Dengue	QC	NaN	NaN	NaN	9.62011	0.369253
Dengue / QC	_MNVAPAC[Carbamidomethyl (C)]LPERDWAESTLMTQK_	P00742	0.423553	0.423553	3.27024e-07	6.99544e-07	134	P00742	F10	Coagulation factor X	FA10_HUMAN	1	34.1227	1.34123	Dengue	QC	NaN	NaN	NaN	96.7816	0.0742611
Dengue / QC	_INC[Carbamidomethyl (C)]QGKTYLFKGSQYWR_	P04004	2.32113	2.32113	3.27705e-07	7.00389e-07	56	P04004	VTN	Vitronectin	VTNC_HUMAN	1	399.723	4.99723	Dengue	QC	NaN	NaN	NaN	37.9503	0.274191
Dengue / QC	_QINSYVK_	P08185	1.04347	1.04347	3.3124e-07	7.07431e-07	40	P08185	SERPINA6	Corticosteroid-binding globulin	CBG_HUMAN	1	106.118	2.06118	Dengue	QC	NaN	NaN	NaN	28.3163	0.133707
Dengue / QC	_DKVTAWK_	P19827	0.74435	0.74435	3.31568e-07	7.07874e-07	48	P19827	ITIH1	Inter-alpha-trypsin inhibitor heavy chain H1	ITIH1_HUMAN	1	67.5219	1.67522	Dengue	QC	NaN	NaN	NaN	41.6176	0.133142
Dengue / QC	_FGNADGAAC[Carbamidomethyl (C)]HFPFIFEGR_	P14780	2.26976	2.26976	3.3259e-07	7.09799e-07	18	P14780	MMP9	Matrix metalloproteinase-9	MMP9_HUMAN	1	382.243	4.82243	Dengue	QC	NaN	NaN	NaN	11.6638	0.241567
Dengue / QC	_NAIGGKFPLYNLGFGNNLNYNFLENM[Oxidation (M)]ALENHGFAR_	Q06033;Q06033-2	0.907601	0.907601	3.36608e-07	7.17592e-07	34	Q06033;Q06033-2	ITIH3	Inter-alpha-trypsin inhibitor heavy chain H3;Isoform 2 of Inter-alpha-trypsin inhibitor heavy chain H3	ITIH3_HUMAN	1	87.5924	1.87592	Dengue	QC	NaN	NaN	NaN	14.4874	0.715891
Dengue / QC	_YGQPLPGYTTK_	A6XND0;P17936;P17936-2	0.723421	0.723421	3.44268e-07	7.32067e-07	30	A6XND0;P17936;P17936-2	IGFBP3	Insulin-like growth factor-binding protein 3;Insulin-like growth factor-binding protein 3;Isoform 2 of Insulin-like growth factor-binding protein 3	A6XND0_HUMAN;IBP3_HUMAN;IBP3_HUMAN	1	65.1093	1.65109	Dengue	QC	NaN	NaN	NaN	24.7386	0.0974707
Dengue / QC	_VNRNNLELSTPLK_	P07225	0.590651	0.590651	3.44591e-07	7.32224e-07	16	P07225	PROS1	Vitamin K-dependent protein S	PROS_HUMAN	1	50.5926	1.50593	Dengue	QC	NaN	NaN	NaN	11.1539	0.104439
Dengue / QC	_QSTLVLFPGDLR_	P14780	1.10731	1.10731	3.55351e-07	7.53457e-07	66	P14780	MMP9	Matrix metalloproteinase-9	MMP9_HUMAN	1	115.444	2.15444	Dengue	QC	NaN	NaN	NaN	48.0537	0.21308
Dengue / QC	_C[Carbamidomethyl (C)]QHEMDQYWGIGSLASGINLFTNSFEGPVLDHR_	P07358	0.805497	0.805497	3.59085e-07	7.60279e-07	86	P07358	C8B	Complement component C8 beta chain	CO8B_HUMAN	1	74.7748	1.74775	Dengue	QC	NaN	NaN	NaN	25.0855	0.133945
Dengue / QC	_ILDDLSPR_	Q14624	-0.511914	0.511914	3.59974e-07	7.61615e-07	176	Q14624	ITIH4	Inter-alpha-trypsin inhibitor heavy chain H4	ITIH4_HUMAN	1	-29.8708	0.701292	Dengue	QC	NaN	NaN	NaN	56.2044	0.0902368
Dengue / QC	_DGRPEIQLHNHWAQLTVGAGPR_	I3L145;P04278	0.758921	0.758921	3.59975e-07	7.61615e-07	104	I3L145;P04278	SHBG	Sex hormone-binding globulin	I3L145_HUMAN;SHBG_HUMAN	1	69.2224	1.69222	Dengue	QC	NaN	NaN	NaN	89.5306	0.12529
Dengue / QC	_KLISVDTEHSNIYLQNGPDRIGR_	P00450	0.992413	0.992413	3.61828e-07	7.64711e-07	110	P00450	CP	Ceruloplasmin	CERU_HUMAN	1	98.951	1.98951	Dengue	QC	NaN	NaN	NaN	64.3083	0.138726
Dengue / QC	_STGSWSTLKTQDQK_	B4E1Z4	1.79827	1.79827	3.62154e-07	7.65126e-07	150	B4E1Z4	NaN	cDNA FLJ55673, highly similar to Complement factor B (EC 3.4.21.47)	B4E1Z4_HUMAN	1	247.803	3.47803	Dengue	QC	NaN	NaN	NaN	125.328	0.300413
Dengue / QC	_QLPGGQNPVSYVYLEVVSK_	P01031	0.577125	0.577125	3.65713e-07	7.71813e-07	146	P01031	C5	Complement C5	CO5_HUMAN	1	49.1874	1.49187	Dengue	QC	NaN	NaN	NaN	92.7184	0.0949347
Dengue / QC	_LMIYDVSK_	P01706	-0.758191	0.758191	3.79637e-07	8.00052e-07	172	P01706	IGLV2-11	Immunoglobulin lambda variable 2-11	LV211_HUMAN	1	-40.8763	0.591237	Dengue	QC	NaN	NaN	NaN	111.159	0.138074
Dengue / QC	_WLGRYYC[Carbamidomethyl (C)]FQGNQFLR_	P02790	0.304056	0.304056	3.87336e-07	8.15401e-07	146	P02790	HPX	Hemopexin	HEMO_HUMAN	1	23.4611	1.23461	Dengue	QC	NaN	NaN	NaN	87.9181	0.0539146
Dengue / QC	_VILGAHQEVNLESHVQEIEVSR_	P08519	1.03311	1.03311	3.87653e-07	8.15777e-07	14	P08519	LPA	Apolipoprotein(a)	APOA_HUMAN	1	104.643	2.04643	Dengue	QC	NaN	NaN	NaN	6.09159	0.379406
Dengue / QC	_NTLELSNGVIVK_	P04114	0.475733	0.475733	3.90219e-07	8.20589e-07	102	P04114	APOB	Apolipoprotein B-100	APOB_HUMAN	1	39.0624	1.39062	Dengue	QC	NaN	NaN	NaN	93.6016	0.104445
Dengue / QC	_TLADLTLLDSPIKVPLLLSEPINIIDALEM[Oxidation (M)]R_	P04114	0.686715	0.686715	4.06198e-07	8.52061e-07	116	P04114	APOB	Apolipoprotein B-100	APOB_HUMAN	1	60.9614	1.60961	Dengue	QC	NaN	NaN	NaN	20.4499	0.12103
Dengue / QC	_DSPIQC[Carbamidomethyl (C)]IQAIAENR_	E7ER44;P02788	2.14854	2.14854	4.0801e-07	8.55251e-07	34	E7ER44;P02788	LTF	Lactotransferrin	E7ER44_HUMAN;TRFL_HUMAN	1	343.378	4.43378	Dengue	QC	NaN	NaN	NaN	20.0139	0.294545
Dengue / QC	_LALDNGGLAR_	Q14624	-0.378076	0.378076	4.14904e-07	8.68324e-07	176	Q14624	ITIH4	Inter-alpha-trypsin inhibitor heavy chain H4	ITIH4_HUMAN	1	-23.0537	0.769463	Dengue	QC	NaN	NaN	NaN	67.6667	0.0643514
Dengue / QC	_EIGELYLPK_	P01011	-0.435133	0.435133	4.14984e-07	8.68324e-07	176	P01011	SERPINA3	Alpha-1-antichymotrypsin	AACT_HUMAN	1	-26.0374	0.739626	Dengue	QC	NaN	NaN	NaN	125.702	0.0747985
Dengue / QC	_TIKVPMMYGAGK_	G3V2W1;Q9UK55	0.39354	0.39354	4.15596e-07	8.69295e-07	82	G3V2W1;Q9UK55	SERPINA10	Protein Z-dependent protease inhibitor	G3V2W1_HUMAN;ZPI_HUMAN	1	31.3613	1.31361	Dengue	QC	NaN	NaN	NaN	59.912	0.0917305
Dengue / QC	_GRTLEIPGNSDPNM[Oxidation (M)]IPDGDFNSYVR_	P0C0L5	1.84495	1.84495	4.16497e-07	8.70871e-07	100	P0C0L5	C4B	Complement C4-B	CO4B_HUMAN	1	259.24	3.5924	Dengue	QC	NaN	NaN	NaN	87.6692	0.29167
Dengue / QC	_VTISVDTSK_	P06331	-0.608657	0.608657	4.17567e-07	8.72797e-07	174	P06331	IGHV4-34	Immunoglobulin heavy variable 4-34	HV434_HUMAN	1	-34.4193	0.655807	Dengue	QC	NaN	NaN	NaN	60.1627	0.111901
Dengue / QC	_TLIEKTNEER_	P10909;P10909-2;P10909-4;P10909-5	0.547593	0.547593	4.17804e-07	8.72983e-07	144	P10909;P10909-2;P10909-4;P10909-5	CLU	Clusterin;Isoform 2 of Clusterin;Isoform 4 of Clusterin;Isoform 5 of Clusterin	CLUS_HUMAN	1	46.1645	1.46164	Dengue	QC	NaN	NaN	NaN	124.376	0.116778
Dengue / QC	_YLYEIARRHPYFYAPELLFFAK_	P02768	0.493928	0.493928	4.22965e-07	8.82826e-07	140	P02768	ALB	Serum albumin	ALBU_HUMAN	1	40.8274	1.40827	Dengue	QC	NaN	NaN	NaN	88.3831	0.0915884
Dengue / QC	_VKIDQTVEELR_	P06727	1.55198	1.55198	4.28777e-07	8.93294e-07	28	P06727	APOA4	Apolipoprotein A-IV	APOA4_HUMAN	1	193.219	2.93219	Dengue	QC	NaN	NaN	NaN	21.07	0.251176
Dengue / QC	_WTPPRAQITGYRLTVGLTR_	P02751;P02751-15;P02751-3;P02751-7	1.93671	1.93671	4.42594e-07	9.18908e-07	44	P02751;P02751-15;P02751-3;P02751-7	FN1	Fibronectin;Isoform 15 of Fibronectin;Isoform 3 of Fibronectin;Isoform 7 of Fibronectin	FINC_HUMAN	1	282.831	3.82831	Dengue	QC	NaN	NaN	NaN	35.8192	0.280904
Dengue / QC	_QGYDLSPLTPLSELSVQC[Carbamidomethyl (C)]NR_	P05160	0.714357	0.714357	4.43539e-07	9.20547e-07	94	P05160	F13B	Coagulation factor XIII B chain	F13B_HUMAN	1	64.0751	1.64075	Dengue	QC	NaN	NaN	NaN	28.8216	0.130518
Dengue / QC	_RLTLQGIISWGSGC[Carbamidomethyl (C)]GDR_	P00748	1.1976	1.1976	4.45299e-07	9.23875e-07	106	P00748	F12	Coagulation factor XII	FA12_HUMAN	1	129.359	2.29359	Dengue	QC	NaN	NaN	NaN	68.5505	0.218803
Dengue / QC	_AQTTVTC[Carbamidomethyl (C)]MENGWSPTPR_	P08603	0.325929	0.325929	4.46103e-07	9.25215e-07	176	P08603	CFH	Complement factor H	CFAH_HUMAN	1	25.3471	1.25347	Dengue	QC	NaN	NaN	NaN	126.6	0.0543697
Dengue / QC	_AAFGQGSGPIM[Oxidation (M)]LDEVQC[Carbamidomethyl (C)]TGTEASLADC[Carbamidomethyl (C)]K_	Q08380	0.312846	0.312846	4.50838e-07	9.34707e-07	36	Q08380	LGALS3BP	Galectin-3-binding protein	LG3BP_HUMAN	1	24.2156	1.24216	Dengue	QC	NaN	NaN	NaN	15.2715	0.418483
Dengue / QC	_STGGAPTFNVTVTK_	P07737	0.561645	0.561645	4.55548e-07	9.43807e-07	84	P07737	PFN1	Profilin-1	PROF1_HUMAN	1	47.5951	1.47595	Dengue	QC	NaN	NaN	NaN	72.325	0.0994344
Dengue / QC	_VNGVLTALPVSVADGR_	Q9Y6R7	0.674031	0.674031	4.56762e-07	9.45988e-07	88	Q9Y6R7	FCGBP	IgGFc-binding protein	FCGBP_HUMAN	1	59.5525	1.59552	Dengue	QC	NaN	NaN	NaN	82.042	0.144071
Dengue / QC	_TPFVTHPGYDTGNGIQLPGTSGQQPSVGQQMIFEEHGFRR_	P02751;P02751-15;P02751-3;P02751-7	0.57197	0.57197	4.5768e-07	9.47558e-07	138	P02751;P02751-15;P02751-3;P02751-7	FN1	Fibronectin;Isoform 15 of Fibronectin;Isoform 3 of Fibronectin;Isoform 7 of Fibronectin	FINC_HUMAN	1	48.6552	1.48655	Dengue	QC	NaN	NaN	NaN	122.905	0.104323
Dengue / QC	_DMYSFLEDM[Oxidation (M)]GLK_	P01023	0.795028	0.795028	4.59322e-07	9.50288e-07	66	P01023	A2M	Alpha-2-macroglobulin	A2MG_HUMAN	1	73.5111	1.73511	Dengue	QC	NaN	NaN	NaN	55.7262	0.114906
Dengue / QC	_LC[Carbamidomethyl (C)]M[Oxidation (M)]GSGLNLC[Carbamidomethyl (C)]EPNNK_	P02787	-0.359449	0.359449	4.617e-07	9.54873e-07	158	P02787	TF	Serotransferrin	TRFE_HUMAN	1	-22.0538	0.779462	Dengue	QC	NaN	NaN	NaN	72.2492	0.0748241
Dengue / QC	_LKC[Carbamidomethyl (C)]LAYDFYPGK_	P25311	1.48585	1.48585	4.62123e-07	9.55412e-07	44	P25311	AZGP1	Zinc-alpha-2-glycoprotein	ZA2G_HUMAN	1	180.082	2.80082	Dengue	QC	NaN	NaN	NaN	38.9376	0.247638
Dengue / QC	_C[Carbamidomethyl (C)]DPHEATC[Carbamidomethyl (C)]YDDGK_	P02751;P02751-15;P02751-3;P02751-7	1.05299	1.05299	4.66581e-07	9.63612e-07	44	P02751;P02751-15;P02751-3;P02751-7	FN1	Fibronectin;Isoform 15 of Fibronectin;Isoform 3 of Fibronectin;Isoform 7 of Fibronectin	FINC_HUMAN	1	107.482	2.07482	Dengue	QC	NaN	NaN	NaN	26.8651	0.222737
Dengue / QC	_SGLSTGWTQLSK_	P04217	-0.419044	0.419044	4.73225e-07	9.75622e-07	176	P04217	A1BG	Alpha-1B-glycoprotein	A1BG_HUMAN	1	-25.208	0.74792	Dengue	QC	NaN	NaN	NaN	52.8517	0.0706525
Dengue / QC	_RPWNVASLIYETK_	P02748	-0.601348	0.601348	4.7363e-07	9.76116e-07	176	P02748	C9	Complement component C9	CO9_HUMAN	1	-34.0862	0.659138	Dengue	QC	NaN	NaN	NaN	51.0734	0.103674
Dengue / QC	_TNGVC[Carbamidomethyl (C)]VDWR_	P04275	1.22187	1.22187	4.81666e-07	9.90597e-07	44	P04275	VWF	von Willebrand factor	VWF_HUMAN	1	133.248	2.33248	Dengue	QC	NaN	NaN	NaN	32.4554	0.191885
Dengue / QC	_TLLVEAEGIEQEK_	P20742	2.78351	2.78351	4.89589e-07	1.00619e-06	82	P20742	PZP	Pregnancy zone protein	PZP_HUMAN	1	588.526	6.88526	Dengue	QC	NaN	NaN	NaN	51.8455	0.498224
Dengue / QC	_A[Acetyl (Protein N-term)]GWNAYIDNLMADGTC[Carbamidomethyl (C)]QDAAIVGYK_	P07737	0.512622	0.512622	4.90534e-07	1.00778e-06	52	P07737	PFN1	Profilin-1	PROF1_HUMAN	1	42.664	1.42664	Dengue	QC	NaN	NaN	NaN	43.8651	0.132108
Dengue / QC	_AFQYHSK_	P00747	0.867784	0.867784	4.96513e-07	1.01899e-06	116	P00747	PLG	Plasminogen	PLMN_HUMAN	1	82.4857	1.82486	Dengue	QC	NaN	NaN	NaN	52.2713	0.209818
Dengue / QC	_DLYANTVLSGGTTMYPGIADR_	P60709	0.363339	0.363339	4.99441e-07	1.02465e-06	84	P60709	ACTB	Actin, cytoplasmic 1	ACTB_HUMAN	1	28.64	1.2864	Dengue	QC	NaN	NaN	NaN	65.6404	0.0977807
Dengue / QC	_SFVHLEPMSHELPC[Carbamidomethyl (C)]GHTQTVQAHYILNGGTLLGLK_	P01023	0.630295	0.630295	5.13272e-07	1.05083e-06	144	P01023	A2M	Alpha-2-macroglobulin	A2MG_HUMAN	1	54.7881	1.54788	Dengue	QC	NaN	NaN	NaN	138.296	0.108096
Dengue / QC	_SGSSTASWIQNVDTK_	P04114	0.465557	0.465557	5.19173e-07	1.06143e-06	82	P04114	APOB	Apolipoprotein B-100	APOB_HUMAN	1	38.0851	1.38085	Dengue	QC	NaN	NaN	NaN	51.4128	0.0901718
Dengue / QC	_VTVSC[Carbamidomethyl (C)]SGGMSLEGPSAFLC[Carbamidomethyl (C)]GSSLK_	P10643	0.674292	0.674292	5.21646e-07	1.06611e-06	126	P10643	C7	Complement component C7	CO7_HUMAN	1	59.5813	1.59581	Dengue	QC	NaN	NaN	NaN	117.846	0.120186
Dengue / QC	_IGEHTPSALAIMENANVLAR_	J3KPS3;P04075	1.73949	1.73949	5.22316e-07	1.06674e-06	46	J3KPS3;P04075	ALDOA	Fructose-bisphosphate aldolase;Fructose-bisphosphate aldolase A	J3KPS3_HUMAN;ALDOA_HUMAN	1	233.917	3.33917	Dengue	QC	NaN	NaN	NaN	19.9408	0.217694
Dengue / QC	_TPC[Carbamidomethyl (C)]TVSC[Carbamidomethyl (C)]NIPVVSGKEC[Carbamidomethyl (C)]EEIIR_	P02675	1.8928	1.8928	5.2375e-07	1.0693e-06	110	P02675	FGB	Fibrinogen beta chain	FIBB_HUMAN	1	271.355	3.71355	Dengue	QC	NaN	NaN	NaN	98.2009	0.347397
Dengue / QC	_QKVLVNER_	P00739	1.31065	1.31065	5.28775e-07	1.07881e-06	70	P00739	HPR	Haptoglobin-related protein	HPTR_HUMAN	1	148.053	2.48053	Dengue	QC	NaN	NaN	NaN	57.5386	0.196026
Dengue / QC	_QSM[Oxidation (M)]TLSSEVQIPDFDVDLGTILR_	P04114	1.22616	1.22616	5.36813e-07	1.09407e-06	104	P04114	APOB	Apolipoprotein B-100	APOB_HUMAN	1	133.944	2.33944	Dengue	QC	NaN	NaN	NaN	13.5507	0.0923117
Dengue / QC	_ALAQC[Carbamidomethyl (C)]APPPAVC[Carbamidomethyl (C)]AELVREPGC[Carbamidomethyl (C)]GC[Carbamidomethyl (C)]C[Carbamidomethyl (C)]LTC[Carbamidomethyl (C)]ALSEGQPC[Carbamidomethyl (C)]GIYTER_	A6XND0;P17936;P17936-2	0.676718	0.676718	5.38089e-07	1.09629e-06	28	A6XND0;P17936;P17936-2	IGFBP3	Insulin-like growth factor-binding protein 3;Insulin-like growth factor-binding protein 3;Isoform 2 of Insulin-like growth factor-binding protein 3	A6XND0_HUMAN;IBP3_HUMAN;IBP3_HUMAN	1	59.8499	1.5985	Dengue	QC	NaN	NaN	NaN	20.9976	0.144329
Dengue / QC	_C[Carbamidomethyl (C)]DPVDQC[Carbamidomethyl (C)]QDSETGTFYQIGDSWEK_	P02751;P02751-15;P02751-3;P02751-7	0.82303	0.82303	5.51169e-07	1.11984e-06	116	P02751;P02751-15;P02751-3;P02751-7	FN1	Fibronectin;Isoform 15 of Fibronectin;Isoform 3 of Fibronectin;Isoform 7 of Fibronectin	FINC_HUMAN	1	76.9118	1.76912	Dengue	QC	NaN	NaN	NaN	104.315	0.148068
Dengue / QC	_VTGVVLFR_	P08294	0.947795	0.947795	5.53685e-07	1.12418e-06	72	P08294	SOD3	Extracellular superoxide dismutase [Cu-Zn]	SODE_HUMAN	1	92.8923	1.92892	Dengue	QC	NaN	NaN	NaN	56.5274	0.170209
Dengue / QC	_TRPHWC[Carbamidomethyl (C)]C[Carbamidomethyl (C)]TR_	Q16610	1.62425	1.62425	5.57971e-07	1.13132e-06	38	Q16610	ECM1	Extracellular matrix protein 1	ECM1_HUMAN	1	208.281	3.08281	Dengue	QC	NaN	NaN	NaN	33.3617	0.262397
Dengue / QC	_DRDGNTLTYYR_	P02748	-0.384477	0.384477	5.59434e-07	1.1335e-06	172	P02748	C9	Complement component C9	CO9_HUMAN	1	-23.3944	0.766056	Dengue	QC	NaN	NaN	NaN	78.4396	0.0719295
Dengue / QC	_WSSPPVC[Carbamidomethyl (C)]LEPC[Carbamidomethyl (C)]TVNVDYMNR_	P05160	0.462499	0.462499	5.82601e-07	1.17559e-06	78	P05160	F13B	Coagulation factor XIII B chain	F13B_HUMAN	1	37.7926	1.37793	Dengue	QC	NaN	NaN	NaN	34.214	0.12351
Dengue / QC	_ASTPNGYDNGIIWATWK_	P02679;P02679-2	1.53991	1.53991	5.87449e-07	1.18496e-06	46	P02679;P02679-2	FGG	Fibrinogen gamma chain;Isoform Gamma-A of Fibrinogen gamma chain	FIBG_HUMAN	1	190.776	2.90776	Dengue	QC	NaN	NaN	NaN	38.5935	0.198443
Dengue / QC	_GLEWMGGFDPEDGETIYAQK_	A0A0C4DH33	1.21494	1.21494	5.91168e-07	1.19165e-06	54	A0A0C4DH33	IGHV1-24	Immunoglobulin heavy variable 1-24	HV124_HUMAN	1	132.131	2.32131	Dengue	QC	NaN	NaN	NaN	43.3425	0.206165
Dengue / QC	_TYM[Oxidation (M)]LAFDVNDEKNWGLSVYADKPETTK_	P02763	1.77987	1.77987	5.94369e-07	1.19769e-06	100	P02763	ORM1	Alpha-1-acid glycoprotein 1	A1AG1_HUMAN	1	243.396	3.43396	Dengue	QC	NaN	NaN	NaN	54.753	0.207021
Dengue / QC	_SRWQQGNIFSC[Carbamidomethyl (C)]SVMHEALHNR_	P01860	0.612351	0.612351	6.06882e-07	1.22207e-06	110	P01860	IGHG3	Immunoglobulin heavy constant gamma 3	IGHG3_HUMAN	1	52.8748	1.52875	Dengue	QC	NaN	NaN	NaN	99.0168	0.0980216
Dengue / QC	_NDNDNIFLSPLSISTAFAMTK_	P01008	1.44455	1.44455	6.08115e-07	1.22371e-06	24	P01008	SERPINC1	Antithrombin-III	ANT3_HUMAN	1	172.177	2.72177	Dengue	QC	NaN	NaN	NaN	13.9856	0.17848
Dengue / QC	_SC[Carbamidomethyl (C)]DKTHT[Hex]C[Carbamidomethyl (C)]PPC[Carbamidomethyl (C)]PAPELLGGPSVFLFPPKPK_	P01857	-0.212385	0.212385	6.11892e-07	1.23089e-06	122	P01857	IGHG1	Immunoglobulin heavy constant gamma 1	IGHG1_HUMAN	1	-13.6891	0.863109	Dengue	QC	NaN	NaN	NaN	84.883	0.188348
Dengue / QC	_C[Carbamidomethyl (C)]LDPC[Carbamidomethyl (C)]VVSEENMNKNNIQLK_	Q9BXR6	0.844597	0.844597	6.12536e-07	1.23135e-06	46	Q9BXR6	CFHR5	Complement factor H-related protein 5	FHR5_HUMAN	1	79.5763	1.79576	Dengue	QC	NaN	NaN	NaN	36.69	0.153633
Dengue / QC	_GFPRGDKLFGPDLK_	P08697	-0.359683	0.359683	6.1812e-07	1.24215e-06	74	P08697	SERPINF2	Alpha-2-antiplasmin	A2AP_HUMAN	1	-22.0664	0.779336	Dengue	QC	NaN	NaN	NaN	33.9268	0.324884
Dengue / QC	_NPNLPPETVDSLKNILTSNNIDVKK_	P05090	0.430031	0.430031	6.18988e-07	1.24347e-06	110	P05090	APOD	Apolipoprotein D	APOD_HUMAN	1	34.7262	1.34726	Dengue	QC	NaN	NaN	NaN	62.6115	0.083078
Dengue / QC	_WHWSSGSLVSYK_	P05451	-0.263655	0.263655	6.3724e-07	1.27665e-06	68	P05451	REG1A	Lithostathine-1-alpha	REG1A_HUMAN	1	-16.7025	0.832975	Dengue	QC	NaN	NaN	NaN	10.8969	0.0808309
Dengue / QC	_C[Carbamidomethyl (C)]LAFEC[Carbamidomethyl (C)]PENYRR_	P23142	0.73912	0.73912	6.44724e-07	1.28989e-06	162	P23142	FBLN1	Fibulin-1	FBLN1_HUMAN	1	66.9158	1.66916	Dengue	QC	NaN	NaN	NaN	151.345	0.127358
Dengue / QC	_MYSVNGYTFGSLPGLSMC[Carbamidomethyl (C)]AEDR_	P00450	0.571676	0.571676	6.44588e-07	1.28989e-06	136	P00450	CP	Ceruloplasmin	CERU_HUMAN	1	48.6249	1.48625	Dengue	QC	NaN	NaN	NaN	85.5831	0.129603
Dengue / QC	_THTC[Carbamidomethyl (C)]PPC[Carbamidomethyl (C)]PAPELLGGPS[Hex]VFLFPPKPKDTLMISR_	P01857	1.33134	1.33134	6.47066e-07	1.29413e-06	126	P01857	IGHG1	Immunoglobulin heavy constant gamma 1	IGHG1_HUMAN	1	151.635	2.51635	Dengue	QC	NaN	NaN	NaN	84.9045	0.160664
Dengue / QC	_SGLSTGWTQLSKLLELTGPK_	P04217	1.49911	1.49911	6.47788e-07	1.29514e-06	142	P04217	A1BG	Alpha-1B-glycoprotein	A1BG_HUMAN	1	182.669	2.82669	Dengue	QC	NaN	NaN	NaN	126.164	0.234981
Dengue / QC	_VYFFKGK_	P04004	0.972023	0.972023	6.52768e-07	1.30376e-06	38	P04004	VTN	Vitronectin	VTNC_HUMAN	1	96.1589	1.96159	Dengue	QC	NaN	NaN	NaN	20.1444	0.257536
Dengue / QC	_GEAFTLKATVLNYLPKC[Carbamidomethyl (C)]IR_	P01023	0.771419	0.771419	6.61673e-07	1.32065e-06	84	P01023	A2M	Alpha-2-macroglobulin	A2MG_HUMAN	1	70.6948	1.70695	Dengue	QC	NaN	NaN	NaN	73.3056	0.1396
Dengue / QC	_VFDEFKPLVEEPQNLIKQN[Hex]C[Carbamidomethyl (C)]ELFEQLGEYK_	P02768	1.69082	1.69082	6.65783e-07	1.32706e-06	44	P02768	ALB	Serum albumin	ALBU_HUMAN	1	222.84	3.2284	Dengue	QC	NaN	NaN	NaN	21.2623	0.420292
Dengue / QC	_GVPIPNKVIFIR_	P01023	-0.472758	0.472758	6.70721e-07	1.33582e-06	174	P01023	A2M	Alpha-2-macroglobulin	A2MG_HUMAN	1	-27.9414	0.720586	Dengue	QC	NaN	NaN	NaN	121.593	0.0778036
Dengue / QC	_APVGHFYEPQAPSAEVEM[Oxidation (M)]TSYVLLAYLTAQPAPTSEDLTSATNIVK_	P01023	0.644445	0.644445	6.77489e-07	1.34811e-06	114	P01023	A2M	Alpha-2-macroglobulin	A2MG_HUMAN	1	56.3138	1.56314	Dengue	QC	NaN	NaN	NaN	93.7924	0.232771
Dengue / QC	_VPEARPNSM[Oxidation (M)]VVEHPEFLK_	P06396	1.61715	1.61715	6.80565e-07	1.35331e-06	34	P06396	GSN	Gelsolin	GELS_HUMAN	1	206.769	3.06769	Dengue	QC	NaN	NaN	NaN	27.5937	0.22224
Dengue / QC	_EWVAIESDSVQPVPR_	Q96KN2	0.787286	0.787286	6.85162e-07	1.36107e-06	44	Q96KN2	CNDP1	Beta-Ala-His dipeptidase	CNDP1_HUMAN	1	72.5825	1.72583	Dengue	QC	NaN	NaN	NaN	32.9526	0.149685
Dengue / QC	_ADGSPVKVGVETTKPSK_	A0M8Q6	2.01509	2.01509	6.86674e-07	1.36362e-06	36	A0M8Q6	IGLC7	Immunoglobulin lambda constant 7	IGLC7_HUMAN	1	304.205	4.04205	Dengue	QC	NaN	NaN	NaN	25.8305	0.296975
Dengue / QC	_SHC[Carbamidomethyl (C)]IAEVENDEMPADLPS[HexNAc]LAADFVES[HexNAc]K[Hex(2)]DVC[Carbamidomethyl (C)]K_	P02768	1.64295	1.64295	6.88123e-07	1.36603e-06	58	P02768	ALB	Serum albumin	ALBU_HUMAN	1	212.303	3.12303	Dengue	QC	NaN	NaN	NaN	51.4435	0.383397
Dengue / QC	_C[Carbamidomethyl (C)]PLLVDSEGWVK_	P01833	2.41444	2.41444	6.90477e-07	1.37025e-06	30	P01833	PIGR	Polymeric immunoglobulin receptor	PIGR_HUMAN	1	433.114	5.33114	Dengue	QC	NaN	NaN	NaN	21.8462	0.384165
Dengue / QC	_C[Carbamidomethyl (C)]C[Carbamidomethyl (C)]VEC[Carbamidomethyl (C)]PPC[Carbamidomethyl (C)]PAPPVAGPS[Hex]VFLFPPKPK_	P01859	0.0405184	0.0405184	7.04152e-07	1.3955e-06	160	P01859	IGHG2	Immunoglobulin heavy constant gamma 2	IGHG2_HUMAN	1	2.84833	1.02848	Dengue	QC	NaN	NaN	NaN	102.12	0.219381
Dengue / QC	_HPDEAAFFDTASTGK_	P02671	1.70001	1.70001	7.11026e-07	1.40818e-06	152	P02671	FGA	Fibrinogen alpha chain	FIBA_HUMAN	1	224.903	3.24903	Dengue	QC	NaN	NaN	NaN	121.955	0.299989
Dengue / QC	_AKVFKDVFLEMNIPYSVVR_	P01031	0.603946	0.603946	7.11371e-07	1.40838e-06	84	P01031	C5	Complement C5	CO5_HUMAN	1	51.9868	1.51987	Dengue	QC	NaN	NaN	NaN	52.5056	0.105133
Dengue / QC	_FSGSNSGNTATLTISR_	A0A075B6K5	-0.644917	0.644917	7.3047e-07	1.44425e-06	176	A0A075B6K5	IGLV3-9	Immunoglobulin lambda variable 3-9	LV39_HUMAN	1	-36.047	0.63953	Dengue	QC	NaN	NaN	NaN	72.2768	0.110905
Dengue / QC	_DGHVILQLNSIPSSDFLC[Carbamidomethyl (C)]VR_	P01031	0.860414	0.860414	7.3278e-07	1.44741e-06	70	P01031	C5	Complement C5	CO5_HUMAN	1	81.556	1.81556	Dengue	QC	NaN	NaN	NaN	34.2807	0.140432
Dengue / QC	_ITINPDTSKNQFSLQLNSVTPEDTAVYYC[Carbamidomethyl (C)]AR_	A0A0B4J1U7	1.25793	1.25793	7.3393e-07	1.44866e-06	22	A0A0B4J1U7	IGHV6-1	Immunoglobulin heavy variable 6-1	HV601_HUMAN	1	139.152	2.39152	Dengue	QC	NaN	NaN	NaN	15.2582	0.274084
Dengue / QC	_TVAAPS[Hex]VFIFPPSDEQLKSGTASVVC[Carbamidomethyl (C)]LLNNFYPR_	P01834	0.407047	0.407047	7.43699e-07	1.46696e-06	142	P01834	IGKC	Immunoglobulin kappa constant	IGKC_HUMAN	1	32.5969	1.32597	Dengue	QC	NaN	NaN	NaN	113.614	0.119352
Dengue / QC	_YISKYELDK_	P01024	-0.330715	0.330715	7.49608e-07	1.47713e-06	166	P01024	C3	Complement C3	CO3_HUMAN	1	-20.4858	0.795142	Dengue	QC	NaN	NaN	NaN	115.155	0.0751373
Dengue / QC	_EPAAQAPVK_	A0A0A0MS09;P01880;P01880-2	2.19095	2.19095	7.56759e-07	1.48973e-06	22	A0A0A0MS09;P01880;P01880-2	IGHD	Immunoglobulin heavy constant delta (Fragment);Immunoglobulin heavy constant delta;Isoform 2 of Immunoglobulin heavy constant delta	A0A0A0MS09_HUMAN;IGHD_HUMAN;IGHD_HUMAN	1	356.606	4.56606	Dengue	QC	NaN	NaN	NaN	14.5574	0.288537
Dengue / QC	_GVALHRPDVYLLPPAR_	P01871	-0.561349	0.561349	7.65166e-07	1.50276e-06	176	P01871	IGHM	Immunoglobulin heavy constant mu	IGHM_HUMAN	1	-32.2332	0.677668	Dengue	QC	NaN	NaN	NaN	51.0368	0.0978676
Dengue / QC	_SVLRPSQFGGQPC[Carbamidomethyl (C)]TAPLVAFQPC[Carbamidomethyl (C)]IPSKLC[Carbamidomethyl (C)]K_	P13671	1.26128	1.26128	7.7113e-07	1.51296e-06	88	P13671	C6	Complement component C6	CO6_HUMAN	1	139.708	2.39708	Dengue	QC	NaN	NaN	NaN	63.4785	0.219735
Dengue / QC	_PSLSHLLSQYYGAGVARDPGFR_	Q96PD5	0.586148	0.586148	7.7777e-07	1.52344e-06	42	Q96PD5	PGLYRP2	N-acetylmuramoyl-L-alanine amidase	PGRP2_HUMAN	1	50.1233	1.50123	Dengue	QC	NaN	NaN	NaN	32.4825	0.110948
Dengue / QC	_LIQGAPTIR_	P18065	1.09275	1.09275	7.79801e-07	1.52641e-06	52	P18065	IGFBP2	Insulin-like growth factor-binding protein 2	IBP2_HUMAN	1	113.28	2.1328	Dengue	QC	NaN	NaN	NaN	44.8293	0.216442
Dengue / QC	_GLLVGEILSAVLSQEGINILTHLPK_	P01031	1.50588	1.50588	7.87717e-07	1.54037e-06	40	P01031	C5	Complement C5	CO5_HUMAN	1	183.997	2.83997	Dengue	QC	NaN	NaN	NaN	7.58982	0.146533
Dengue / QC	_AGC[Carbamidomethyl (C)]VAESTAVC[Carbamidomethyl (C)]R_	Q9Y6R7	0.934564	0.934564	8.09774e-07	1.57982e-06	82	Q9Y6R7	FCGBP	IgGFc-binding protein	FCGBP_HUMAN	1	91.1313	1.91131	Dengue	QC	NaN	NaN	NaN	48.8659	0.248878
Dengue / QC	_ETTFNSLLC[Carbamidomethyl (C)]PSGGEVSEELSLKLPPNVVEESAR_	P01023	0.778605	0.778605	8.15855e-07	1.59063e-06	150	P01023	A2M	Alpha-2-macroglobulin	A2MG_HUMAN	1	71.5472	1.71547	Dengue	QC	NaN	NaN	NaN	107.744	0.124014
Dengue / QC	_MVQEQC[Carbamidomethyl (C)]C[Carbamidomethyl (C)]HSQLEELHC[Carbamidomethyl (C)]ATGISLANEQDR_	P23142	0.858842	0.858842	8.18766e-07	1.59578e-06	126	P23142	FBLN1	Fibulin-1	FBLN1_HUMAN	1	81.3582	1.81358	Dengue	QC	NaN	NaN	NaN	108.108	0.160802
Dengue / QC	_SHC[Carbamidomethyl (C)]IAEVENDEMPADLPSLAADFVESKDVC[Carbamidomethyl (C)]K_	P02768	0.59067	0.59067	8.2505e-07	1.60696e-06	176	P02768	ALB	Serum albumin	ALBU_HUMAN	1	50.5946	1.50595	Dengue	QC	NaN	NaN	NaN	130.871	0.124488
Dengue / QC	_LLLFSPSVVHLGVPLSVGVQLQDVPRGQVVK_	P0C0L5	1.50895	1.50895	8.28858e-07	1.61331e-06	56	P0C0L5	C4B	Complement C4-B	CO4B_HUMAN	1	184.602	2.84602	Dengue	QC	NaN	NaN	NaN	44.0817	0.216541
Dengue / QC	_LMIYEVSK_	P01709	-0.672321	0.672321	8.30254e-07	1.61496e-06	174	P01709	IGLV2-8	Immunoglobulin lambda variable 2-8	LV208_HUMAN	1	-37.2503	0.627497	Dengue	QC	NaN	NaN	NaN	98.112	0.118351
Dengue / QC	_PLVEEPQNLIK_	P02768	-0.385668	0.385668	8.35365e-07	1.62383e-06	162	P02768	ALB	Serum albumin	ALBU_HUMAN	1	-23.4576	0.765424	Dengue	QC	NaN	NaN	NaN	97.0683	0.0634364
Dengue / QC	_TQILVGVNKDEGTAFLVYGAPGFSK_	F8WF14;P06276	1.10377	1.10377	8.48093e-07	1.64694e-06	38	F8WF14;P06276	BCHE	Carboxylic ester hydrolase;Cholinesterase	F8WF14_HUMAN;CHLE_HUMAN	1	114.915	2.14915	Dengue	QC	NaN	NaN	NaN	26.4428	0.218338
Dengue / QC	_SILQMSLDHHIVTPLTSLVIENEAGDER_	P19823	0.50519	0.50519	8.55493e-07	1.66021e-06	176	P19823	ITIH2	Inter-alpha-trypsin inhibitor heavy chain H2	ITIH2_HUMAN	1	41.9311	1.41931	Dengue	QC	NaN	NaN	NaN	144.287	0.0931025
Dengue / QC	_TSNFNAAISLK_	P02748	-0.406834	0.406834	8.71773e-07	1.68958e-06	174	P02748	C9	Complement component C9	CO9_HUMAN	1	-24.5723	0.754277	Dengue	QC	NaN	NaN	NaN	87.908	0.0761515
Dengue / QC	_DTANLFPQTSLTLHMWPDTEGTFNVEC[Carbamidomethyl (C)]LTTDHYTGGMK_	P00450	0.598691	0.598691	8.7222e-07	1.68989e-06	144	P00450	CP	Ceruloplasmin	CERU_HUMAN	1	51.4342	1.51434	Dengue	QC	NaN	NaN	NaN	62.1817	0.102998
Dengue / QC	_VSNKGLPAPIEK_	P01859	1.50913	1.50913	8.90447e-07	1.72011e-06	176	P01859	IGHG2	Immunoglobulin heavy constant gamma 2	IGHG2_HUMAN	1	184.638	2.84638	Dengue	QC	NaN	NaN	NaN	152.579	0.258111
Dengue / QC	_LLQDEFPGIPSPLDAAVEC[Carbamidomethyl (C)]HRGEC[Carbamidomethyl (C)]QAEGVLFFQGDR_	P02790	0.527911	0.527911	8.95051e-07	1.72787e-06	42	P02790	HPX	Hemopexin	HEMO_HUMAN	1	44.184	1.44184	Dengue	QC	NaN	NaN	NaN	25.8864	0.108444
Dengue / QC	_TLPEC[Carbamidomethyl (C)]SK_	P43652	0.636031	0.636031	8.98496e-07	1.73338e-06	98	P43652	AFM	Afamin	AFAM_HUMAN	1	55.4048	1.55405	Dengue	QC	NaN	NaN	NaN	90.4554	0.115566
Dengue / QC	_LVGGDNLC[Carbamidomethyl (C)]SGRLEVLHK_	O43866	1.63138	1.63138	9.01114e-07	1.73729e-06	52	O43866	CD5L	CD5 antigen-like	CD5L_HUMAN	1	209.809	3.09809	Dengue	QC	NaN	NaN	NaN	40.8554	0.203748
Dengue / QC	_TNTNVNC[Carbamidomethyl (C)]PIEC[Carbamidomethyl (C)]FMPLDVQADREDSRE_	P02751;P02751-15;P02751-3;P02751-7	0.811779	0.811779	9.09353e-07	1.7526e-06	128	P02751;P02751-15;P02751-3;P02751-7	FN1	Fibronectin;Isoform 15 of Fibronectin;Isoform 3 of Fibronectin;Isoform 7 of Fibronectin	FINC_HUMAN	1	75.5374	1.75537	Dengue	QC	NaN	NaN	NaN	112.068	0.142328
Dengue / QC	_QEDDLANINQWVK_	P08697	0.485783	0.485783	9.15394e-07	1.76252e-06	108	P08697	SERPINF2	Alpha-2-antiplasmin	A2AP_HUMAN	1	40.0345	1.40035	Dengue	QC	NaN	NaN	NaN	87.5555	0.0869128
Dengue / QC	_GHFSISIPVKSDIAPVARLLIYAVLPTGDVIGDSAK_	P01023	2.68952	2.68952	9.20074e-07	1.77095e-06	62	P01023	A2M	Alpha-2-macroglobulin	A2MG_HUMAN	1	545.097	6.45097	Dengue	QC	NaN	NaN	NaN	28.8801	0.279733
Dengue / QC	_TEHPFTVEEFVLPK_	P01023	-0.615531	0.615531	9.21908e-07	1.7739e-06	176	P01023	A2M	Alpha-2-macroglobulin	A2MG_HUMAN	1	-34.731	0.65269	Dengue	QC	NaN	NaN	NaN	75.488	0.0868722
Dengue / QC	_VSVLC[Carbamidomethyl (C)]QENYLIQEGEEITC[Carbamidomethyl (C)]K_	P08603	0.377343	0.377343	9.32125e-07	1.79121e-06	128	P08603	CFH	Complement factor H	CFAH_HUMAN	1	29.8947	1.29895	Dengue	QC	NaN	NaN	NaN	106.216	0.0756335
Dengue / QC	_DASGVTFTWTPSSGKSAVQGPPER_	P01876	1.92818	1.92818	9.35785e-07	1.79707e-06	36	P01876	IGHA1	Immunoglobulin heavy constant alpha 1	IGHA1_HUMAN	1	280.574	3.80574	Dengue	QC	NaN	NaN	NaN	26.4845	0.300729
Dengue / QC	_VPQVSTPTLVEVSRNLGKVGSK_	P02768	1.88611	1.88611	9.54099e-07	1.83045e-06	48	P02768	ALB	Serum albumin	ALBU_HUMAN	1	269.637	3.69637	Dengue	QC	NaN	NaN	NaN	35.6616	0.272368
Dengue / QC	_NLSVEDAAR_	P04040	1.81063	1.81063	9.63965e-07	1.84757e-06	22	P04040	CAT	Catalase	CATA_HUMAN	1	250.795	3.50795	Dengue	QC	NaN	NaN	NaN	16.4497	0.245535
Dengue / QC	_GQPLSPEK_	P01871	-0.579636	0.579636	9.69608e-07	1.85718e-06	170	P01871	IGHM	Immunoglobulin heavy constant mu	IGHM_HUMAN	1	-33.0868	0.669132	Dengue	QC	NaN	NaN	NaN	61.4101	0.107295
Dengue / QC	_DGAGDVAFVK_	P02787	-0.330145	0.330145	9.83246e-07	1.88208e-06	176	P02787	TF	Serotransferrin	TRFE_HUMAN	1	-20.4543	0.795457	Dengue	QC	NaN	NaN	NaN	66.9554	0.063999
Dengue / QC	_LSC[Carbamidomethyl (C)]AASGFT[HexN]FSGSAMHWVR_	A0A0B4J1V6	-0.372564	0.372564	9.87851e-07	1.89028e-06	20	A0A0B4J1V6	IGHV3-73	Immunoglobulin heavy variable 3-73	HV373_HUMAN	1	-22.7592	0.772408	Dengue	QC	NaN	NaN	NaN	8.65214	0.478248
Dengue / QC	_EIFRWPESPK_	A0A0A0MS09;P01880;P01880-2	0.875352	0.875352	9.89757e-07	1.89331e-06	122	A0A0A0MS09;P01880;P01880-2	IGHD	Immunoglobulin heavy constant delta (Fragment);Immunoglobulin heavy constant delta;Isoform 2 of Immunoglobulin heavy constant delta	A0A0A0MS09_HUMAN;IGHD_HUMAN;IGHD_HUMAN	1	83.4455	1.83446	Dengue	QC	NaN	NaN	NaN	98.3546	0.147738
Dengue / QC	_LLIYDASNLETGVPSR_	P01593;P01594	-0.74111	0.74111	1.00174e-06	1.91498e-06	176	P01593;P01594	IGKV1D-33;IGKV1-33	Immunoglobulin kappa variable 1D-33;Immunoglobulin kappa variable 1-33	KVD33_HUMAN;KV133_HUMAN	1	-40.1721	0.598279	Dengue	QC	NaN	NaN	NaN	55.3245	0.120276
Dengue / QC	_DIPQPHAEPWAFSLDLGLK_	I3L145;P04278	0.926521	0.926521	1.03435e-06	1.97156e-06	122	I3L145;P04278	SHBG	Sex hormone-binding globulin	I3L145_HUMAN;SHBG_HUMAN	1	90.0687	1.90069	Dengue	QC	NaN	NaN	NaN	91.7324	0.151719
Dengue / QC	_YDVENC[Carbamidomethyl (C)]LANK_	P01023	-0.400075	0.400075	1.07238e-06	2.03877e-06	170	P01023	A2M	Alpha-2-macroglobulin	A2MG_HUMAN	1	-24.2181	0.757819	Dengue	QC	NaN	NaN	NaN	127.271	0.0768926
Dengue / QC	_GEWPWQVTLHTTSPTQR_	P03951	1.25615	1.25615	1.07527e-06	2.04361e-06	26	P03951	F11	Coagulation factor XI	FA11_HUMAN	1	138.858	2.38858	Dengue	QC	NaN	NaN	NaN	20.6358	0.170764
Dengue / QC	_ALYYDLISSPDIHGTYKELLDTVTAPQK_	P36955	1.12151	1.12151	1.10342e-06	2.09372e-06	148	P36955	SERPINF1	Pigment epithelium-derived factor	PEDF_HUMAN	1	117.574	2.17574	Dengue	QC	NaN	NaN	NaN	93.745	0.178664
Dengue / QC	_EAGIPEFYDYDVALIKLK_	B4E1Z4	1.57982	1.57982	1.1074e-06	2.09925e-06	32	B4E1Z4	NaN	cDNA FLJ55673, highly similar to Complement factor B (EC 3.4.21.47)	B4E1Z4_HUMAN	1	198.932	2.98932	Dengue	QC	NaN	NaN	NaN	24.0704	0.29266
Dengue / QC	_ISC[Carbamidomethyl (C)]PEGTNAYR_	P05451	0.837378	0.837378	1.12195e-06	2.12477e-06	34	P05451	REG1A	Lithostathine-1-alpha	REG1A_HUMAN	1	78.68	1.7868	Dengue	QC	NaN	NaN	NaN	28.9551	0.189601
Dengue / QC	_LGLGADVAQVTGALR_	P14780	1.67121	1.67121	1.12261e-06	2.12533e-06	40	P14780	MMP9	Matrix metalloproteinase-9	MMP9_HUMAN	1	218.483	3.18483	Dengue	QC	NaN	NaN	NaN	30.6462	0.244973
Dengue / QC	_ELSSFIDKGQELC[Carbamidomethyl (C)]ADYSENTFTEYKK_	P02774;P02774-3	0.298218	0.298218	1.12559e-06	2.1303e-06	144	P02774;P02774-3	GC	Vitamin D-binding protein;Isoform 3 of Vitamin D-binding protein	VTDB_HUMAN	1	22.9625	1.22962	Dengue	QC	NaN	NaN	NaN	114.829	0.0679584
Dengue / QC	_TQVNTQAEQLRR_	P06727	0.890805	0.890805	1.12736e-06	2.13296e-06	68	P06727	APOA4	Apolipoprotein A-IV	APOA4_HUMAN	1	85.4211	1.85421	Dengue	QC	NaN	NaN	NaN	53.561	0.151334
Dengue / QC	_LLC[Carbamidomethyl (C)]QC[Carbamidomethyl (C)]LGFGSGHFR_	P02751;P02751-15;P02751-3;P02751-7	0.460219	0.460219	1.12957e-06	2.13646e-06	136	P02751;P02751-15;P02751-3;P02751-7	FN1	Fibronectin;Isoform 15 of Fibronectin;Isoform 3 of Fibronectin;Isoform 7 of Fibronectin	FINC_HUMAN	1	37.575	1.37575	Dengue	QC	NaN	NaN	NaN	129.256	0.0898484
Dengue / QC	_DYWSTVK_	B0YIW2;P02656	1.64265	1.64265	1.14119e-06	2.15773e-06	20	B0YIW2;P02656	APOC3	Apolipoprotein C-III	B0YIW2_HUMAN;APOC3_HUMAN	1	212.239	3.12239	Dengue	QC	NaN	NaN	NaN	10.0662	0.195746
Dengue / QC	_C[Carbamidomethyl (C)]C[Carbamidomethyl (C)]QDGVTR_	P0C0L5	0.513965	0.513965	1.14944e-06	2.17195e-06	140	P0C0L5	C4B	Complement C4-B	CO4B_HUMAN	1	42.797	1.42797	Dengue	QC	NaN	NaN	NaN	85.9601	0.10788
Dengue / QC	_AYYHLLEQVAPKGDEEGVPAVVIDMSGLR_	P13796	0.445548	0.445548	1.14936e-06	2.17195e-06	94	P13796	LCP1	Plastin-2	PLSL_HUMAN	1	36.1831	1.36183	Dengue	QC	NaN	NaN	NaN	83.058	0.127006
Dengue / QC	_NWGLSVYADKPETTKEQLGEFYEALDC[Carbamidomethyl (C)]LR_	P02763	1.60711	1.60711	1.15261e-06	2.17654e-06	126	P02763	ORM1	Alpha-1-acid glycoprotein 1	A1AG1_HUMAN	1	204.641	3.04641	Dengue	QC	NaN	NaN	NaN	78.6038	0.211522
Dengue / QC	_AGFSWIEVTFKNPLVWVHASPEHVVVTR_	Q14624	0.695599	0.695599	1.15488e-06	2.17873e-06	154	Q14624	ITIH4	Inter-alpha-trypsin inhibitor heavy chain H4	ITIH4_HUMAN	1	61.9557	1.61956	Dengue	QC	NaN	NaN	NaN	86.4522	0.136039
Dengue / QC	_LAAYLM[Oxidation (M)]LMR_	P04114	0.397121	0.397121	1.18127e-06	2.22494e-06	24	P04114	APOB	Apolipoprotein B-100	APOB_HUMAN	1	31.6878	1.31688	Dengue	QC	NaN	NaN	NaN	18.5215	0.103435
Dengue / QC	_LYPIANGNNQSPVDIK_	P00915	0.926098	0.926098	1.18737e-06	2.23572e-06	48	P00915	CA1	Carbonic anhydrase 1	CAH1_HUMAN	1	90.013	1.90013	Dengue	QC	NaN	NaN	NaN	32.985	0.157598
Dengue / QC	_IYISGMAPRPSLAKK_	P04004	0.640775	0.640775	1.20158e-06	2.26103e-06	168	P04004	VTN	Vitronectin	VTNC_HUMAN	1	55.9166	1.55917	Dengue	QC	NaN	NaN	NaN	135.58	0.0993421
Dengue / QC	_VFEAMNSYDLGC[Carbamidomethyl (C)]GPGGGDSALQVFQAAGLAFSDGDQWTLSR_	P0C0L5	1.30327	1.30327	1.20473e-06	2.26622e-06	124	P0C0L5	C4B	Complement C4-B	CO4B_HUMAN	1	146.788	2.46788	Dengue	QC	NaN	NaN	NaN	15.2823	0.146355
Dengue / QC	_WTPPRAQITGYR_	P02751;P02751-15;P02751-3;P02751-7	1.24191	1.24191	1.22916e-06	2.3085e-06	38	P02751;P02751-15;P02751-3;P02751-7	FN1	Fibronectin;Isoform 15 of Fibronectin;Isoform 3 of Fibronectin;Isoform 7 of Fibronectin	FINC_HUMAN	1	136.512	2.36512	Dengue	QC	NaN	NaN	NaN	30.833	0.245176
Dengue / QC	_VLSIAQAHSPAFSC[Carbamidomethyl (C)]EQVR_	P08571	0.802463	0.802463	1.26018e-06	2.36073e-06	46	P08571	CD14	Monocyte differentiation antigen CD14	CD14_HUMAN	1	74.4076	1.74408	Dengue	QC	NaN	NaN	NaN	26.3675	0.101593
Dengue / QC	_NSLYLQM[Oxidation (M)]NSLR_	P01782	-0.686673	0.686673	1.28072e-06	2.39387e-06	154	P01782	IGHV3-9	Immunoglobulin heavy variable 3-9	HV309_HUMAN	1	-37.8715	0.621285	Dengue	QC	NaN	NaN	NaN	58.5263	0.127435
Dengue / QC	_SDGSENFNR_	Q08830	1.52358	1.52358	1.28608e-06	2.40238e-06	26	Q08830	FGL1	Fibrinogen-like protein 1	FGL1_HUMAN	1	187.504	2.87504	Dengue	QC	NaN	NaN	NaN	10.0697	0.172356
Dengue / QC	_VVQGKEPAHLMSLFGGKPMIIYK_	P06396	0.395209	0.395209	1.30873e-06	2.44236e-06	102	P06396	GSN	Gelsolin	GELS_HUMAN	1	31.5133	1.31513	Dengue	QC	NaN	NaN	NaN	66.0098	0.0914208
Dengue / QC	_IYGKWYNLAIGSTC[Carbamidomethyl (C)]PWLK_	P02760	1.48508	1.48508	1.30931e-06	2.44265e-06	30	P02760	AMBP	Protein AMBP	AMBP_HUMAN	1	179.934	2.79934	Dengue	QC	NaN	NaN	NaN	22.3005	0.268422
Dengue / QC	_LLIYGNSNRPSGVPDR_	P01703	-0.859917	0.859917	1.3111e-06	2.44523e-06	170	P01703	IGLV1-40	Immunoglobulin lambda variable 1-40	LV140_HUMAN	1	-44.9016	0.550984	Dengue	QC	NaN	NaN	NaN	50.7234	0.153208
Dengue / QC	_IYGNQDTSSQLKKFYNQVSTPLLR_	P19823	0.92762	0.92762	1.35617e-06	2.52529e-06	98	P19823	ITIH2	Inter-alpha-trypsin inhibitor heavy chain H2	ITIH2_HUMAN	1	90.2136	1.90214	Dengue	QC	NaN	NaN	NaN	72.4804	0.128192
Dengue / QC	_AFSDRNTLIIYLDKVSHSEDDC[Carbamidomethyl (C)]LAFK_	P01024	1.01863	1.01863	1.35935e-06	2.5304e-06	52	P01024	C3	Complement C3	CO3_HUMAN	1	102.6	2.026	Dengue	QC	NaN	NaN	NaN	16.56	0.187698
Dengue / QC	_IRPFFPQQ_	P02675	2.16678	2.16678	1.36844e-06	2.54411e-06	150	P02675	FGB	Fibrinogen beta chain	FIBB_HUMAN	1	349.02	4.4902	Dengue	QC	NaN	NaN	NaN	137.227	0.381819
Dengue / QC	_FDSDAASQR_	P05534;P30447	3.01857	3.01857	1.39905e-06	2.59774e-06	20	P05534;P30447	HLA-A	HLA class I histocompatibility antigen, A-24 alpha chain;HLA class I histocompatibility antigen, A-23 alpha chain	1A24_HUMAN;1A23_HUMAN	1	710.364	8.10364	Dengue	QC	NaN	NaN	NaN	8.6528	0.22645
Dengue / QC	_HTFMGVVSLGSPSGEVSHPRK_	P02765	2.0059	2.0059	1.40662e-06	2.61096e-06	44	P02765	AHSG	Alpha-2-HS-glycoprotein	FETUA_HUMAN	1	301.64	4.0164	Dengue	QC	NaN	NaN	NaN	24.2655	0.278414
Dengue / QC	_NTFAEVTGLSPGVTYYFKVFAVSHGR_	P02751;P02751-15;P02751-3;P02751-7	0.764844	0.764844	1.41155e-06	2.61928e-06	72	P02751;P02751-15;P02751-3;P02751-7	FN1	Fibronectin;Isoform 15 of Fibronectin;Isoform 3 of Fibronectin;Isoform 7 of Fibronectin	FINC_HUMAN	1	69.9187	1.69919	Dengue	QC	NaN	NaN	NaN	32.451	0.127136
Dengue / QC	_LMNIFLKDSITTWEILAVSMSDKK_	P01024	0.94148	0.94148	1.43295e-06	2.65732e-06	144	P01024	C3	Complement C3	CO3_HUMAN	1	92.0497	1.9205	Dengue	QC	NaN	NaN	NaN	84.2594	0.145303
Dengue / QC	_HRQGPVNLLSDPEQGVEVTGQYEREK_	Q14624	0.930239	0.930239	1.44997e-06	2.6855e-06	164	Q14624	ITIH4	Inter-alpha-trypsin inhibitor heavy chain H4	ITIH4_HUMAN	1	90.5592	1.90559	Dengue	QC	NaN	NaN	NaN	147.188	0.165033
Dengue / QC	_FLLKAEPLAFTFSHDYK_	P04114	1.36714	1.36714	1.47e-06	2.71832e-06	28	P04114	APOB	Apolipoprotein B-100	APOB_HUMAN	1	157.959	2.57959	Dengue	QC	NaN	NaN	NaN	20.5613	0.179755
Dengue / QC	_DIYKGVDMR_	H0YAC1;P03952	0.254432	0.254432	1.47333e-06	2.72278e-06	124	H0YAC1;P03952	KLKB1	Plasma kallikrein (Fragment);Plasma kallikrein	H0YAC1_HUMAN;KLKB1_HUMAN	1	19.2866	1.19287	Dengue	QC	NaN	NaN	NaN	46.2861	0.0990323
Dengue / QC	_C[Carbamidomethyl (C)]C[Carbamidomethyl (C)]ESASEDC[Carbamidomethyl (C)]MAKELPEHTVK_	P02774;P02774-3	1.35929	1.35929	1.50802e-06	2.78252e-06	120	P02774;P02774-3	GC	Vitamin D-binding protein;Isoform 3 of Vitamin D-binding protein	VTDB_HUMAN	1	156.559	2.56559	Dengue	QC	NaN	NaN	NaN	100.443	0.232313
Dengue / QC	_NKPGVYTDVAYYLAWIR_	P00748	1.25337	1.25337	1.51923e-06	2.79871e-06	50	P00748	F12	Coagulation factor XII	FA12_HUMAN	1	138.397	2.38397	Dengue	QC	NaN	NaN	NaN	31.8281	0.227662
Dengue / QC	_C[Carbamidomethyl (C)]STSPLLEAC[Carbamidomethyl (C)]EFLRK_	E7ER44;P02788	1.98394	1.98394	1.51965e-06	2.79871e-06	20	E7ER44;P02788	LTF	Lactotransferrin	E7ER44_HUMAN;TRFL_HUMAN	1	295.572	3.95572	Dengue	QC	NaN	NaN	NaN	15.8809	0.266786
Dengue / QC	_SHC[Carbamidomethyl (C)]IAEVENDEM[Oxidation (M)]PADLPS[Hex]LAADFVESKDVC[Carbamidomethyl (C)]KNYAEAK_	P02768	1.24232	1.24232	1.52646e-06	2.80861e-06	92	P02768	ALB	Serum albumin	ALBU_HUMAN	1	136.579	2.36579	Dengue	QC	NaN	NaN	NaN	65.7464	0.354153
Dengue / QC	_GRFIISR_	A0A0C4DH35	1.21445	1.21445	1.54073e-06	2.8331e-06	112	A0A0C4DH35	IGHV3-35	Immunoglobulin heavy variable 3-35 (non-functional) (Fragment)	A0A0C4DH35_HUMAN	1	132.053	2.32053	Dengue	QC	NaN	NaN	NaN	96.5499	0.221194
Dengue / QC	_IVSSAMEPDR_	P08603	0.428586	0.428586	1.54153e-06	2.83369e-06	68	P08603	CFH	Complement factor H	CFAH_HUMAN	1	34.5913	1.34591	Dengue	QC	NaN	NaN	NaN	20.5964	0.131489
Dengue / QC	_ISTSLPVLDLIDAIQPGSINYDLLK_	P13796	0.585337	0.585337	1.54712e-06	2.84219e-06	56	P13796	LCP1	Plastin-2	PLSL_HUMAN	1	50.039	1.50039	Dengue	QC	NaN	NaN	NaN	49.1301	0.114739
Dengue / QC	_HPPSPTRDEC[Carbamidomethyl (C)]FAR_	Q16610	1.15722	1.15722	1.57071e-06	2.88191e-06	56	Q16610	ECM1	Extracellular matrix protein 1	ECM1_HUMAN	1	123.028	2.23028	Dengue	QC	NaN	NaN	NaN	48.7701	0.299222
Dengue / QC	_AEFAEVSK[Hex]LVTDLTK_	P02768	0.946413	0.946413	1.57878e-06	2.89492e-06	120	P02768	ALB	Serum albumin	ALBU_HUMAN	1	92.7076	1.92708	Dengue	QC	NaN	NaN	NaN	71.6308	0.140581
Dengue / QC	_YGTLFTMDR_	Q15582	0.773625	0.773625	1.589e-06	2.91276e-06	38	Q15582	TGFBI	Transforming growth factor-beta-induced protein ig-h3	BGH3_HUMAN	1	70.956	1.70956	Dengue	QC	NaN	NaN	NaN	30.4985	0.119834
Dengue / QC	_AFIQLWAFDAVKGK_	P02760	1.55234	1.55234	1.59109e-06	2.91478e-06	128	P02760	AMBP	Protein AMBP	AMBP_HUMAN	1	193.292	2.93292	Dengue	QC	NaN	NaN	NaN	100.943	0.215681
Dengue / QC	_RAPDLQDLPWQVK_	P22891;P22891-2	0.31508	0.31508	1.61418e-06	2.95432e-06	114	P22891;P22891-2	PROZ	Vitamin K-dependent protein Z;Isoform 2 of Vitamin K-dependent protein Z	PROZ_HUMAN	1	24.408	1.24408	Dengue	QC	NaN	NaN	NaN	99.9138	0.0858294
Dengue / QC	_ELPQSIVYK_	Q12805;Q12805-2;Q12805-4	1.29008	1.29008	1.63454e-06	2.98971e-06	68	Q12805;Q12805-2;Q12805-4	EFEMP1	EGF-containing fibulin-like extracellular matrix protein 1;Isoform 2 of EGF-containing fibulin-like extracellular matrix protein 1;Isoform 4 of EGF-containing fibulin-like extracellular matrix protein 1	FBLN3_HUMAN	1	144.541	2.44541	Dengue	QC	NaN	NaN	NaN	50.0108	0.252062
Dengue / QC	_LVTDLTKVHTEC[Carbamidomethyl (C)]C[Carbamidomethyl (C)]HGDLLEC[Carbamidomethyl (C)]ADDRADLAK_	P02768	1.05594	1.05594	1.64349e-06	3.00421e-06	174	P02768	ALB	Serum albumin	ALBU_HUMAN	1	107.907	2.07907	Dengue	QC	NaN	NaN	NaN	159.942	0.196095
Dengue / QC	_AQLYIDC[Carbamidomethyl (C)]EK_	P07996	0.549548	0.549548	1.64488e-06	3.00582e-06	42	P07996	THBS1	Thrombospondin-1	TSP1_HUMAN	1	46.3627	1.46363	Dengue	QC	NaN	NaN	NaN	25.1998	0.154753
Dengue / QC	_FTC[Carbamidomethyl (C)]AC[Carbamidomethyl (C)]PDQFK_	Q14520;Q14520-2	0.429884	0.429884	1.67757e-06	3.05986e-06	92	Q14520;Q14520-2	HABP2	Hyaluronan-binding protein 2;Isoform 2 of Hyaluronan-binding protein 2	HABP2_HUMAN	1	34.7125	1.34713	Dengue	QC	NaN	NaN	NaN	54.5066	0.0765519
Dengue / QC	_FDEFFSEGC[Carbamidomethyl (C)]APGSKK_	P02787	-0.318748	0.318748	1.68454e-06	3.07068e-06	176	P02787	TF	Serotransferrin	TRFE_HUMAN	1	-19.8235	0.801765	Dengue	QC	NaN	NaN	NaN	106.421	0.0653096
Dengue / QC	_AFQPFFVELTMPYSVIR_	P01023	0.445113	0.445113	1.69737e-06	3.09118e-06	176	P01023	A2M	Alpha-2-macroglobulin	A2MG_HUMAN	1	36.1421	1.36142	Dengue	QC	NaN	NaN	NaN	165.331	0.0895104
Dengue / QC	_HLEVDVWVIEPQGLR_	P19823	0.666619	0.666619	1.69893e-06	3.09307e-06	176	P19823	ITIH2	Inter-alpha-trypsin inhibitor heavy chain H2	ITIH2_HUMAN	1	58.7349	1.58735	Dengue	QC	NaN	NaN	NaN	79.2946	0.138957
Dengue / QC	_IPKSDVVYTDWK_	P02763	1.16927	1.16927	1.70854e-06	3.10961e-06	40	P02763	ORM1	Alpha-1-acid glycoprotein 1	A1AG1_HUMAN	1	124.898	2.24898	Dengue	QC	NaN	NaN	NaN	33.3569	0.159314
Dengue / QC	_EKAEAQAQYSAAVAK_	Q14624	-0.682847	0.682847	1.71976e-06	3.12906e-06	174	Q14624	ITIH4	Inter-alpha-trypsin inhibitor heavy chain H4	ITIH4_HUMAN	1	-37.7065	0.622935	Dengue	QC	NaN	NaN	NaN	42.3747	0.135988
Dengue / QC	_VVVQTESGGR_	P20742	3.31756	3.31756	1.7343e-06	3.15208e-06	62	P20742	PZP	Pregnancy zone protein	PZP_HUMAN	1	896.978	9.96978	Dengue	QC	NaN	NaN	NaN	29.2339	0.451091
Dengue / QC	_SALVLQYLRVPLVDR_	P00740	1.71296	1.71296	1.74896e-06	3.17532e-06	32	P00740	F9	Coagulation factor IX	FA9_HUMAN	1	227.832	3.27832	Dengue	QC	NaN	NaN	NaN	22.195	0.15908
Dengue / QC	_DSVTETLPR_	P03951	0.823952	0.823952	1.76459e-06	3.20171e-06	38	P03951	F11	Coagulation factor XI	FA11_HUMAN	1	77.0249	1.77025	Dengue	QC	NaN	NaN	NaN	29.0916	0.157094
Dengue / QC	_SASNMAIVDVK_	P01023	-0.297894	0.297894	1.7666e-06	3.20439e-06	176	P01023	A2M	Alpha-2-macroglobulin	A2MG_HUMAN	1	-18.6561	0.813439	Dengue	QC	NaN	NaN	NaN	103.038	0.0613768
Dengue / QC	_KC[Carbamidomethyl (C)]YFPYLENGYNQNHGRK_	Q5TFM2	2.30787	2.30787	1.77063e-06	3.21069e-06	32	Q5TFM2	CFH	Complement factor H	Q5TFM2_HUMAN	1	395.153	4.95153	Dengue	QC	NaN	NaN	NaN	15.4159	0.292819
Dengue / QC	_KGETFSC[Carbamidomethyl (C)]MVGHEALPLAFTQK_	A0A286YEY5;P01877	0.848352	0.848352	1.81225e-06	3.28314e-06	108	A0A286YEY5;P01877	IGHA2	Immunoglobulin heavy constant alpha 2 (Fragment);Immunoglobulin heavy constant alpha 2	A0A286YEY5_HUMAN;IGHA2_HUMAN	1	80.0443	1.80044	Dengue	QC	NaN	NaN	NaN	73.6428	0.18493
Dengue / QC	_YLLYYYSDSDKGQGSGVPSR_	A0A075B6J1	0.77668	0.77668	1.8281e-06	3.30879e-06	70	A0A075B6J1	IGLV5-37	Immunoglobulin lambda variable 5-37	LV537_HUMAN	1	71.3184	1.71318	Dengue	QC	NaN	NaN	NaN	50.5498	0.159245
Dengue / QC	_GPLLVQDVVFTDEMAHFDRER_	P04040	2.0715	2.0715	1.83883e-06	3.32617e-06	14	P04040	CAT	Catalase	CATA_HUMAN	1	320.322	4.20322	Dengue	QC	NaN	NaN	NaN	8.45416	0.243107
Dengue / QC	_KADGSYAAWLSR_	P0C0L5	-0.408185	0.408185	1.84175e-06	3.32941e-06	174	P0C0L5	C4B	Complement C4-B	CO4B_HUMAN	1	-24.6429	0.753571	Dengue	QC	NaN	NaN	NaN	109.739	0.0809818
Dengue / QC	_VVWC[Carbamidomethyl (C)]AVGEQELRK_	E7ER44;P02788	1.93535	1.93535	1.84602e-06	3.33508e-06	34	E7ER44;P02788	LTF	Lactotransferrin	E7ER44_HUMAN;TRFL_HUMAN	1	282.47	3.8247	Dengue	QC	NaN	NaN	NaN	24.6429	0.269967
Dengue / QC	_APGWDPLC[Carbamidomethyl (C)]WDEC[Carbamidomethyl (C)]R_	Q9Y6R7	1.48922	1.48922	1.8591e-06	3.35561e-06	58	Q9Y6R7	FCGBP	IgGFc-binding protein	FCGBP_HUMAN	1	180.737	2.80737	Dengue	QC	NaN	NaN	NaN	41.7242	0.252215
Dengue / QC	_HLIVTPSGC[Carbamidomethyl (C)]GEQNM[Oxidation (M)]IGMTPTVIAVHYLDETEQWEK_	P01024	1.15409	1.15409	1.89059e-06	3.40932e-06	28	P01024	C3	Complement C3	CO3_HUMAN	1	122.545	2.22545	Dengue	QC	NaN	NaN	NaN	18.5223	0.203242
Dengue / QC	_YNILPEKEDSPFALK_	P20742	2.04976	2.04976	1.91649e-06	3.44863e-06	110	P20742	PZP	Pregnancy zone protein	PZP_HUMAN	1	314.036	4.14036	Dengue	QC	NaN	NaN	NaN	74.3101	0.344964
Dengue / QC	_SVGSQWASPENPC[Carbamidomethyl (C)]LINEC[Carbamidomethyl (C)]VR_	P04275	0.696961	0.696961	1.93057e-06	3.46971e-06	102	P04275	VWF	von Willebrand factor	VWF_HUMAN	1	62.1086	1.62109	Dengue	QC	NaN	NaN	NaN	92.2072	0.127749
Dengue / QC	_KPLEKAVANFFSGSC[Carbamidomethyl (C)]APC[Carbamidomethyl (C)]ADGTDFPQLC[Carbamidomethyl (C)]QLC[Carbamidomethyl (C)]PGC[Carbamidomethyl (C)]GC[Carbamidomethyl (C)]STLNQYFGYSGAFK_	P02787	1.57037	1.57037	1.99703e-06	3.58479e-06	20	P02787	TF	Serotransferrin	TRFE_HUMAN	1	196.982	2.96982	Dengue	QC	NaN	NaN	NaN	14.8456	0.176333
Dengue / QC	_SEDC[Carbamidomethyl (C)]FILDHGK_	P06396	0.436298	0.436298	2.00354e-06	3.59537e-06	74	P06396	GSN	Gelsolin	GELS_HUMAN	1	35.3128	1.35313	Dengue	QC	NaN	NaN	NaN	38.1412	0.0802402
Dengue / QC	_IKSLLPK_	E7ETH0;G3XAM2;P05156	0.916276	0.916276	2.00612e-06	3.59781e-06	98	E7ETH0;G3XAM2;P05156	CFI	Complement factor I	E7ETH0_HUMAN;G3XAM2_HUMAN;CFAI_HUMAN	1	88.7237	1.88724	Dengue	QC	NaN	NaN	NaN	74.8067	0.149543
Dengue / QC	_GQVVKGSVFLRNPSR_	P0C0L5	0.800897	0.800897	2.00589e-06	3.59781e-06	156	P0C0L5	C4B	Complement C4-B	CO4B_HUMAN	1	74.2184	1.74218	Dengue	QC	NaN	NaN	NaN	129.691	0.126063
Dengue / QC	_EVVTSEDGSDC[Carbamidomethyl (C)]PEAMDLGTLSGIGTLDGFR_	P02671	1.2832	1.2832	2.05e-06	3.66756e-06	154	P02671	FGA	Fibrinogen alpha chain	FIBA_HUMAN	1	143.378	2.43378	Dengue	QC	NaN	NaN	NaN	142.166	0.225385
Dengue / QC	_K[Hex]LVAASQAALGL_	P02768	0.469576	0.469576	2.08255e-06	3.72014e-06	90	P02768	ALB	Serum albumin	ALBU_HUMAN	1	38.4702	1.3847	Dengue	QC	NaN	NaN	NaN	81.1475	0.0800313
Dengue / QC	_LDLQEINNWVQAQMK_	P36955	0.900618	0.900618	2.09952e-06	3.74591e-06	106	P36955	SERPINF1	Pigment epithelium-derived factor	PEDF_HUMAN	1	86.6865	1.86687	Dengue	QC	NaN	NaN	NaN	57.6595	0.167359
Dengue / QC	_NPREDYLDVYVFGVGPLVNQVNINALASKK_	B4E1Z4	1.02707	1.02707	2.09918e-06	3.74591e-06	46	B4E1Z4	NaN	cDNA FLJ55673, highly similar to Complement factor B (EC 3.4.21.47)	B4E1Z4_HUMAN	1	103.788	2.03788	Dengue	QC	NaN	NaN	NaN	23.9684	0.131464
Dengue / QC	_LPLEYSYGEYRDLFR_	P07358	0.530696	0.530696	2.11555e-06	3.77108e-06	86	P07358	C8B	Complement component C8 beta chain	CO8B_HUMAN	1	44.4626	1.44463	Dengue	QC	NaN	NaN	NaN	79.3623	0.0921165
Dengue / QC	_AIAANEADAVTLDAGLVYDAYLAPNNLKPVVAEFYGSK_	P02787	0.368701	0.368701	2.20666e-06	3.92281e-06	168	P02787	TF	Serotransferrin	TRFE_HUMAN	1	29.119	1.29119	Dengue	QC	NaN	NaN	NaN	87.9148	0.0898283
Dengue / QC	_AQLVPLPPSTYVEFTVSGTDC[Carbamidomethyl (C)]VAKEATEAAK_	P02765	1.09025	1.09025	2.25158e-06	3.99061e-06	138	P02765	AHSG	Alpha-2-HS-glycoprotein	FETUA_HUMAN	1	112.911	2.12911	Dengue	QC	NaN	NaN	NaN	109.288	0.175173
Dengue / QC	_GC[Carbamidomethyl (C)]GEQTM[Oxidation (M)]IYLAPTLAASR_	P0C0L5	-0.168177	0.168177	2.26111e-06	4.00508e-06	46	P0C0L5	C4B	Complement C4-B	CO4B_HUMAN	1	-11.0033	0.889967	Dengue	QC	NaN	NaN	NaN	10.4143	0.265501
Dengue / QC	_VDNALQSGNSQESVTEQDSK_	P01834	-0.414416	0.414416	2.27681e-06	4.02926e-06	176	P01834	IGKC	Immunoglobulin kappa constant	IGKC_HUMAN	1	-24.9677	0.750323	Dengue	QC	NaN	NaN	NaN	73.4854	0.0835294
Dengue / QC	_RMPC[Carbamidomethyl (C)]AEDYLSVVLNQLC[Carbamidomethyl (C)]VLHEKTPVSDR_	P02768	0.61616	0.61616	2.29979e-06	4.06869e-06	176	P02768	ALB	Serum albumin	ALBU_HUMAN	1	53.279	1.53279	Dengue	QC	NaN	NaN	NaN	154.026	0.137643
Dengue / QC	_TEHYEEQIEAFK_	P02748	-0.433095	0.433095	2.32036e-06	4.10139e-06	168	P02748	C9	Complement component C9	CO9_HUMAN	1	-25.9329	0.740671	Dengue	QC	NaN	NaN	NaN	62.468	0.0831865
Dengue / QC	_GPDFFTR_	P20160	1.18298	1.18298	2.33192e-06	4.11936e-06	38	P20160	AZU1	Azurocidin	CAP7_HUMAN	1	127.046	2.27046	Dengue	QC	NaN	NaN	NaN	22.6909	0.219293
Dengue / QC	_GWVTDGFSSLK_	B0YIW2;P02656	1.8514	1.8514	2.33407e-06	4.12191e-06	22	B0YIW2;P02656	APOC3	Apolipoprotein C-III	B0YIW2_HUMAN;APOC3_HUMAN	1	260.851	3.60851	Dengue	QC	NaN	NaN	NaN	15.3446	0.229994
Dengue / QC	_VVTPLSPPTNLHLEANPDTGVLTVSWER_	P02751;P02751-15;P02751-3;P02751-7	0.717936	0.717936	2.36109e-06	4.16339e-06	100	P02751;P02751-15;P02751-3;P02751-7	FN1	Fibronectin;Isoform 15 of Fibronectin;Isoform 3 of Fibronectin;Isoform 7 of Fibronectin	FINC_HUMAN	1	64.4827	1.64483	Dengue	QC	NaN	NaN	NaN	39.1027	0.132876
Dengue / QC	_ADLEKLTSLSDRYVSHFETEGPHVLLYFDSVPTSR_	P0C0L5	0.413946	0.413946	2.37697e-06	4.18494e-06	120	P0C0L5	C4B	Complement C4-B	CO4B_HUMAN	1	33.2325	1.33233	Dengue	QC	NaN	NaN	NaN	87.4436	0.105465
Dengue / QC	_VTM[Oxidation (M)]TEDTSTDTAYMELSSLR_	A0A0C4DH33	0.540107	0.540107	2.37745e-06	4.18494e-06	30	A0A0C4DH33	IGHV1-24	Immunoglobulin heavy variable 1-24	HV124_HUMAN	1	45.4081	1.45408	Dengue	QC	NaN	NaN	NaN	12.7377	0.884079
Dengue / QC	_KEEYGHNEVVEYDC[Carbamidomethyl (C)]NPNFIINGPK_	Q9BXR6	0.729141	0.729141	2.40045e-06	4.22141e-06	54	Q9BXR6	CFHR5	Complement factor H-related protein 5	FHR5_HUMAN	1	65.7652	1.65765	Dengue	QC	NaN	NaN	NaN	43.229	0.160765
Dengue / QC	_FPETLMEIEIPIVDHSTC[Carbamidomethyl (C)]QK_	P48740	0.925897	0.925897	2.40034e-06	4.22141e-06	30	P48740	MASP1	Mannan-binding lectin serine protease 1	MASP1_HUMAN	1	89.9865	1.89986	Dengue	QC	NaN	NaN	NaN	22.0323	0.178721
Dengue / QC	_APDAGGC[Carbamidomethyl (C)]LHADPDLGVLC[Carbamidomethyl (C)]PTGC[Carbamidomethyl (C)]QLQEALLQQERPIR_	P02675	2.10691	2.10691	2.40382e-06	4.2248e-06	32	P02675	FGB	Fibrinogen beta chain	FIBB_HUMAN	1	330.769	4.30769	Dengue	QC	NaN	NaN	NaN	25.1642	0.318336
Dengue / QC	_PSGVPDRFSGSK_	P01703	1.30482	1.30482	2.4173e-06	4.24596e-06	20	P01703	IGLV1-40	Immunoglobulin lambda variable 1-40	LV140_HUMAN	1	147.052	2.47052	Dengue	QC	NaN	NaN	NaN	10.5156	0.836458
Dengue / QC	_TPFDYC[Carbamidomethyl (C)]ALRR_	G3XAK1;P26927	1.03247	1.03247	2.43536e-06	4.27514e-06	98	G3XAK1;P26927	MST1	Hepatocyte growth factor-like protein	G3XAK1_HUMAN;HGFL_HUMAN	1	104.553	2.04553	Dengue	QC	NaN	NaN	NaN	88.1141	0.159236
Dengue / QC	_ISASAEELR_	P06727	0.471461	0.471461	2.46902e-06	4.33294e-06	158	P06727	APOA4	Apolipoprotein A-IV	APOA4_HUMAN	1	38.6512	1.38651	Dengue	QC	NaN	NaN	NaN	150.474	0.0924499
Dengue / QC	_GDTYPAELYITGSILR_	P05160	0.380578	0.380578	2.48138e-06	4.35203e-06	142	P05160	F13B	Coagulation factor XIII B chain	F13B_HUMAN	1	30.1863	1.30186	Dengue	QC	NaN	NaN	NaN	71.5695	0.0880313
Dengue / QC	_GISLANWMC[Carbamidomethyl (C)]LAK_	P61626	1.06563	1.06563	2.50891e-06	4.39768e-06	52	P61626	LYZ	Lysozyme C	LYSC_HUMAN	1	109.308	2.09308	Dengue	QC	NaN	NaN	NaN	39.6974	0.179887
Dengue / QC	_C[Carbamidomethyl (C)]GPLMDC[Carbamidomethyl (C)]R_	G3XAK1;P26927	0.983885	0.983885	2.54748e-06	4.45998e-06	42	G3XAK1;P26927	MST1	Hepatocyte growth factor-like protein	G3XAK1_HUMAN;HGFL_HUMAN	1	97.7784	1.97778	Dengue	QC	NaN	NaN	NaN	25.7393	0.228566
Dengue / QC	_LLDSLPSDTRLVLLNAIYLSAK_	P05155;P05155-3	0.668043	0.668043	2.59944e-06	4.53746e-06	52	P05155;P05155-3	SERPING1	Plasma protease C1 inhibitor;Isoform 3 of Plasma protease C1 inhibitor	IC1_HUMAN	1	58.8916	1.58892	Dengue	QC	NaN	NaN	NaN	31.1777	0.205195
Dengue / QC	_C[Carbamidomethyl (C)]AFSSQEPYFSYSGAFK_	E7ER44;P02788	1.06244	1.06244	2.67534e-06	4.66304e-06	26	E7ER44;P02788	LTF	Lactotransferrin	E7ER44_HUMAN;TRFL_HUMAN	1	108.846	2.08846	Dengue	QC	NaN	NaN	NaN	20.7956	0.170139
Dengue / QC	_LYPTYSTK_	P80108	0.534357	0.534357	2.71035e-06	4.72125e-06	76	P80108	GPLD1	Phosphatidylinositol-glycan-specific phospholipase D	PHLD_HUMAN	1	44.8297	1.4483	Dengue	QC	NaN	NaN	NaN	42.7493	0.0829035
Dengue / QC	_ALVLIAFAQYLQQC[Carbamidomethyl (C)]PFEDHVKLVNEVTEFAK_	P02768	0.727404	0.727404	2.78847e-06	4.84729e-06	164	P02768	ALB	Serum albumin	ALBU_HUMAN	1	65.5658	1.65566	Dengue	QC	NaN	NaN	NaN	119.15	0.126056
Dengue / QC	_GAVDHKLSLESLTSYFSIESSTKGDVK_	P04114	0.897051	0.897051	2.79234e-06	4.85106e-06	38	P04114	APOB	Apolipoprotein B-100	APOB_HUMAN	1	86.2255	1.86225	Dengue	QC	NaN	NaN	NaN	26.0377	0.204932
Dengue / QC	_QLYNVEATSYALLALLQLKDFDFVPPVVR_	P01024	0.830028	0.830028	2.80848e-06	4.87345e-06	64	P01024	C3	Complement C3	CO3_HUMAN	1	77.772	1.77772	Dengue	QC	NaN	NaN	NaN	21.0133	0.173315
Dengue / QC	_KC[Carbamidomethyl (C)]C[Carbamidomethyl (C)]YDGAC[Carbamidomethyl (C)]VNNDETC[Carbamidomethyl (C)]EQR_	P01031	0.647764	0.647764	2.87831e-06	4.97701e-06	66	P01031	C5	Complement C5	CO5_HUMAN	1	56.6738	1.56674	Dengue	QC	NaN	NaN	NaN	49.9236	0.111659
Dengue / QC	_NADLQVLKPEPELVYEDLR_	P01833	1.62603	1.62603	2.93085e-06	5.06637e-06	56	P01833	PIGR	Polymeric immunoglobulin receptor	PIGR_HUMAN	1	208.662	3.08662	Dengue	QC	NaN	NaN	NaN	40.6532	0.301306
Dengue / QC	_LLIYGASIR_	A0A087WSY6	-0.395312	0.395312	2.93348e-06	5.06942e-06	176	A0A087WSY6	IGKV3D-15	Immunoglobulin kappa variable 3D-15	KVD15_HUMAN	1	-23.9675	0.760325	Dengue	QC	NaN	NaN	NaN	88.4569	0.0727846
Dengue / QC	_TYIYDHGFPYTDPVGVLYEDGDDTVATR_	P04180	0.533585	0.533585	2.98496e-06	5.15385e-06	152	P04180	LCAT	Phosphatidylcholine-sterol acyltransferase	LCAT_HUMAN	1	44.7522	1.44752	Dengue	QC	NaN	NaN	NaN	101.154	0.0904165
Dengue / QC	_SC[Carbamidomethyl (C)]DVESNPGIFLPPGTQAEFNLR_	I3L145;P04278	1.12658	1.12658	3.04452e-06	5.24899e-06	74	I3L145;P04278	SHBG	Sex hormone-binding globulin	I3L145_HUMAN;SHBG_HUMAN	1	118.341	2.18341	Dengue	QC	NaN	NaN	NaN	37.2373	0.164143
Dengue / QC	_QRQEELC[Carbamidomethyl (C)]LAR_	P02753;Q5VY30	0.663856	0.663856	3.09633e-06	5.33519e-06	150	P02753;Q5VY30	RBP4	Retinol-binding protein 4;Retinol binding protein 4, plasma, isoform CRA_b	RET4_HUMAN;Q5VY30_HUMAN	1	58.4312	1.58431	Dengue	QC	NaN	NaN	NaN	121.235	0.113908
Dengue / QC	_QDSLSSQNQLGVLPLSWDIPELVNM[Oxidation (M)]GQWK_	P01024	1.11254	1.11254	3.10997e-06	5.35713e-06	50	P01024	C3	Complement C3	CO3_HUMAN	1	116.226	2.16226	Dengue	QC	NaN	NaN	NaN	41.8467	0.138384
Dengue / QC	_TDC[Carbamidomethyl (C)]LSLPSFENAIPMGEK_	P08603	0.299841	0.299841	3.12076e-06	5.37257e-06	172	P08603	CFH	Complement factor H	CFAH_HUMAN	1	23.1008	1.23101	Dengue	QC	NaN	NaN	NaN	111.394	0.0630976
Dengue / QC	_GDEC[Carbamidomethyl (C)]QLC[Carbamidomethyl (C)]EVENR_	O75882;O75882-2;O75882-3	0.25538	0.25538	3.13446e-06	5.39458e-06	94	O75882;O75882-2;O75882-3	ATRN	Attractin;Isoform 2 of Attractin;Isoform 3 of Attractin	ATRN_HUMAN	1	19.365	1.19365	Dengue	QC	NaN	NaN	NaN	25.5571	0.109286
Dengue / QC	_TC[Carbamidomethyl (C)]QAWSSMTPHSHSR_	P08519	1.32473	1.32473	3.18805e-06	5.47879e-06	150	P08519	LPA	Apolipoprotein(a)	APOA_HUMAN	1	150.486	2.50486	Dengue	QC	NaN	NaN	NaN	126.351	0.225807
Dengue / QC	_FEGIAC[Carbamidomethyl (C)]EISK_	P02748	-0.353238	0.353238	3.20813e-06	5.50847e-06	174	P02748	C9	Complement component C9	CO9_HUMAN	1	-21.7175	0.782825	Dengue	QC	NaN	NaN	NaN	81.4086	0.0671401
Dengue / QC	_C[Carbamidomethyl (C)]HTC[Carbamidomethyl (C)]QNGGTVILMDGK_	P02748	0.16623	0.16623	3.22281e-06	5.53207e-06	24	P02748	C9	Complement component C9	CO9_HUMAN	1	12.2122	1.12212	Dengue	QC	NaN	NaN	NaN	11.1309	0.29093
Dengue / QC	_EHVAHLLFLRDTK_	P19652	2.60618	2.60618	3.25053e-06	5.57473e-06	46	P19652	ORM2	Alpha-1-acid glycoprotein 2	A1AG2_HUMAN	1	508.888	6.08888	Dengue	QC	NaN	NaN	NaN	29.0104	0.266629
Dengue / QC	_GIVEEC[Carbamidomethyl (C)]C[Carbamidomethyl (C)]FR_	P01344-2	0.313184	0.313184	3.25374e-06	5.57703e-06	160	P01344-2	IGF2	Isoform 2 of Insulin-like growth factor II	IGF2_HUMAN	1	24.2447	1.24245	Dengue	QC	NaN	NaN	NaN	105.191	0.0655611
Dengue / QC	_IALGGLLFPASNLR_	I3L145;P04278	1.02899	1.02899	3.25934e-06	5.58338e-06	58	I3L145;P04278	SHBG	Sex hormone-binding globulin	I3L145_HUMAN;SHBG_HUMAN	1	104.059	2.04059	Dengue	QC	NaN	NaN	NaN	38.7388	0.266001
Dengue / QC	_DALSSVQESQVAQQAR_	B0YIW2;P02656	-0.338387	0.338387	3.30389e-06	5.64818e-06	176	B0YIW2;P02656	APOC3	Apolipoprotein C-III	B0YIW2_HUMAN;APOC3_HUMAN	1	-20.9075	0.790925	Dengue	QC	NaN	NaN	NaN	118.614	0.0728201
Dengue / QC	_GHESC[Carbamidomethyl (C)]MGAVVSEYFVLTAAHC[Carbamidomethyl (C)]FTVDDKEHSIK_	B4E1Z4	0.530297	0.530297	3.30371e-06	5.64818e-06	90	B4E1Z4	NaN	cDNA FLJ55673, highly similar to Complement factor B (EC 3.4.21.47)	B4E1Z4_HUMAN	1	44.4226	1.44423	Dengue	QC	NaN	NaN	NaN	53.3528	0.104046
Dengue / QC	_NMAEQIIQEIYSQIQSK_	A0A0B4J1R6;P29401;P29401-2	1.3538	1.3538	3.30612e-06	5.65035e-06	36	A0A0B4J1R6;P29401;P29401-2	TKT	Transketolase;Transketolase;Isoform 2 of Transketolase	A0A0B4J1R6_HUMAN;TKT_HUMAN;TKT_HUMAN	1	155.584	2.55584	Dengue	QC	NaN	NaN	NaN	21.0817	0.267416
Dengue / QC	_PAGLPEKY_	P0DJI8	1.33012	1.33012	3.33521e-06	5.69842e-06	50	P0DJI8	SAA1	Serum amyloid A-1 protein	SAA1_HUMAN	1	151.424	2.51424	Dengue	QC	NaN	NaN	NaN	27.4848	0.235643
Dengue / QC	_LEEAEKAADESER_	A0A087WWU8;P06753-2	0.793311	0.793311	3.37453e-06	5.75892e-06	34	A0A087WWU8;P06753-2	TPM3	Tropomyosin alpha-3 chain;Isoform 2 of Tropomyosin alpha-3 chain	A0A087WWU8_HUMAN;TPM3_HUMAN	1	73.3048	1.73305	Dengue	QC	NaN	NaN	NaN	27.0706	0.131902
Dengue / QC	_YYTYLIMNK_	P01024	-0.339673	0.339673	3.45435e-06	5.8883e-06	174	P01024	C3	Complement C3	CO3_HUMAN	1	-20.9779	0.790221	Dengue	QC	NaN	NaN	NaN	117.015	0.0672146
Dengue / QC	_FRVVSMDENFHPLNELIPLVYIQDPKGNR_	P01023	1.62917	1.62917	3.47541e-06	5.92078e-06	82	P01023	A2M	Alpha-2-macroglobulin	A2MG_HUMAN	1	209.336	3.09336	Dengue	QC	NaN	NaN	NaN	56.8873	0.253613
Dengue / QC	_TERELLESYIDGR_	P00734	0.644575	0.644575	3.48831e-06	5.9393e-06	28	P00734	F2	Prothrombin	THRB_HUMAN	1	56.3279	1.56328	Dengue	QC	NaN	NaN	NaN	18.9522	0.113685
Dengue / QC	_AYSDMREANYIGSDK_	P0DJI8	1.02576	1.02576	3.51921e-06	5.98846e-06	44	P0DJI8	SAA1	Serum amyloid A-1 protein	SAA1_HUMAN	1	103.603	2.03603	Dengue	QC	NaN	NaN	NaN	38.9252	0.18738
Dengue / QC	_GEWVALNPLR_	P08603	0.489758	0.489758	3.53633e-06	6.01251e-06	84	P08603	CFH	Complement factor H	CFAH_HUMAN	1	40.4209	1.40421	Dengue	QC	NaN	NaN	NaN	28.8595	0.0806945
Dengue / QC	_NFPDLNTYIYYNEK_	P15169	0.509452	0.509452	3.60548e-06	6.1211e-06	124	P15169	CPN1	Carboxypeptidase N catalytic chain	CBPN_HUMAN	1	42.3509	1.42351	Dengue	QC	NaN	NaN	NaN	40.0513	0.0928752
Dengue / QC	_VSVSQTSK_	P00740	0.929523	0.929523	3.64065e-06	6.17725e-06	64	P00740	F9	Coagulation factor IX	FA9_HUMAN	1	90.4646	1.90465	Dengue	QC	NaN	NaN	NaN	21.364	0.126508
Dengue / QC	_EGFGHLSPTGTTEFWLGNEK_	P02679;P02679-2	1.64688	1.64688	3.68798e-06	6.25283e-06	128	P02679;P02679-2	FGG	Fibrinogen gamma chain;Isoform Gamma-A of Fibrinogen gamma chain	FIBG_HUMAN	1	213.157	3.13157	Dengue	QC	NaN	NaN	NaN	118.955	0.288723
Dengue / QC	_SSFQVTTC[Carbamidomethyl (C)]K_	P03950	0.846903	0.846903	3.68838e-06	6.25283e-06	70	P03950	ANG	Angiogenin	ANGI_HUMAN	1	79.8635	1.79864	Dengue	QC	NaN	NaN	NaN	64.9192	0.141661
Dengue / QC	_AFWLDVSHNRLEALPNSLLAPLGR_	P35858;P35858-2	1.10237	1.10237	3.73592e-06	6.32978e-06	52	P35858;P35858-2	IGFALS	Insulin-like growth factor-binding protein complex acid labile subunit;Isoform 2 of Insulin-like growth factor-binding protein complex acid labile subunit	ALS_HUMAN	1	114.707	2.14707	Dengue	QC	NaN	NaN	NaN	41.8501	0.136043
Dengue / QC	_ASQSISSYLNWYQQKPGKAPK_	P01597;P04432	-0.335041	0.335041	3.75944e-06	6.36779e-06	136	P01597;P04432	IGKV1-39;IGKV1D-39	Immunoglobulin kappa variable 1-39;Immunoglobulin kappa variable 1D-39	KV139_HUMAN;KVD39_HUMAN	1	-20.7238	0.792762	Dengue	QC	NaN	NaN	NaN	114.605	0.107397
Dengue / QC	_AGLAASLAGPHSIVGR_	P08294	1.89104	1.89104	3.82357e-06	6.46712e-06	22	P08294	SOD3	Extracellular superoxide dismutase [Cu-Zn]	SODE_HUMAN	1	270.903	3.70903	Dengue	QC	NaN	NaN	NaN	15.7197	0.238755
Dengue / QC	_LGADM[Oxidation (M)]EDVC[Carbamidomethyl (C)]GR_	P02649	1.05345	1.05345	3.85701e-06	6.51993e-06	60	P02649	APOE	Apolipoprotein E	APOE_HUMAN	1	107.549	2.07549	Dengue	QC	NaN	NaN	NaN	36.8781	0.220356
Dengue / QC	_GDVAFVKHQTVPQNTGGKNPDPWAK_	P02787	0.791143	0.791143	3.86894e-06	6.53445e-06	152	P02787	TF	Serotransferrin	TRFE_HUMAN	1	73.0445	1.73045	Dengue	QC	NaN	NaN	NaN	137.076	0.136299
Dengue / QC	_IAC[Carbamidomethyl (C)]VLPVLM[Oxidation (M)]DGIQSHPQKPFYTVGEK_	P10643	-0.661788	0.661788	3.97051e-06	6.69639e-06	20	P10643	C7	Complement component C7	CO7_HUMAN	1	-36.7905	0.632095	Dengue	QC	NaN	NaN	NaN	7.46826	0.694703
Dengue / QC	_LDNIYSSDK_	P04114	0.596316	0.596316	4.06054e-06	6.83648e-06	60	P04114	APOB	Apolipoprotein B-100	APOB_HUMAN	1	51.1851	1.51185	Dengue	QC	NaN	NaN	NaN	48.3968	0.0893429
Dengue / QC	_IYEDHDATQQLQGFYSQVAK_	P19827	0.318488	0.318488	4.094e-06	6.88695e-06	132	P19827	ITIH1	Inter-alpha-trypsin inhibitor heavy chain H1	ITIH1_HUMAN	1	24.7023	1.24702	Dengue	QC	NaN	NaN	NaN	119.867	0.0570564
Dengue / QC	_ILDELLQTC[Carbamidomethyl (C)]VDPEDC[Carbamidomethyl (C)]PVC[Carbamidomethyl (C)]EVAGRR_	P04275	0.687058	0.687058	4.09403e-06	6.88695e-06	86	P04275	VWF	von Willebrand factor	VWF_HUMAN	1	60.9997	1.61	Dengue	QC	NaN	NaN	NaN	67.184	0.139073
Dengue / QC	_EPQVYTLPPSQEEMTKNQVSLTC[Carbamidomethyl (C)]LVK_	P01861	0.751007	0.751007	4.15101e-06	6.97284e-06	142	P01861	IGHG4	Immunoglobulin heavy constant gamma 4	IGHG4_HUMAN	1	68.2967	1.68297	Dengue	QC	NaN	NaN	NaN	119.682	0.11704
Dengue / QC	_SLDFNTLVDNISVDPETGDLWVGC[Carbamidomethyl (C)]HPNGMK_	P27169	0.556836	0.556836	4.15333e-06	6.97476e-06	84	P27169	PON1	Serum paraoxonase/arylesterase 1	PON1_HUMAN	1	47.1039	1.47104	Dengue	QC	NaN	NaN	NaN	28.8292	0.105297
Dengue / QC	_LLELTGPK_	P04217	-0.388442	0.388442	4.2553e-06	7.13175e-06	176	P04217	A1BG	Alpha-1B-glycoprotein	A1BG_HUMAN	1	-23.6046	0.763954	Dengue	QC	NaN	NaN	NaN	51.5175	0.0757196
Dengue / QC	_QFTSSTSYNRGDSTFESK_	P02671	1.80116	1.80116	4.25895e-06	7.13584e-06	166	P02671	FGA	Fibrinogen alpha chain	FIBA_HUMAN	1	248.499	3.48499	Dengue	QC	NaN	NaN	NaN	143.223	0.323777
Dengue / QC	_VQQPDC[Carbamidomethyl (C)]R_	P0C0L5	0.565981	0.565981	4.29434e-06	7.18695e-06	112	P0C0L5	C4B	Complement C4-B	CO4B_HUMAN	1	48.0393	1.48039	Dengue	QC	NaN	NaN	NaN	62.5365	0.112686
Dengue / QC	_FSSHVGGTLGQFYQEVLWGSPAASDDGRR_	Q14624	0.335649	0.335649	4.33497e-06	7.25289e-06	128	Q14624	ITIH4	Inter-alpha-trypsin inhibitor heavy chain H4	ITIH4_HUMAN	1	26.1945	1.26194	Dengue	QC	NaN	NaN	NaN	88.8477	0.091296
Dengue / QC	_SC[Carbamidomethyl (C)]GLHQLLRGPEVQLVAHSPWLKDSLSR_	P0C0L5	0.736723	0.736723	4.40009e-06	7.35347e-06	174	P0C0L5	C4B	Complement C4-B	CO4B_HUMAN	1	66.6386	1.66639	Dengue	QC	NaN	NaN	NaN	154.06	0.137955
Dengue / QC	_NVVFVIDK_	Q14624	-0.432573	0.432573	4.61807e-06	7.68504e-06	176	Q14624	ITIH4	Inter-alpha-trypsin inhibitor heavy chain H4	ITIH4_HUMAN	1	-25.9061	0.740939	Dengue	QC	NaN	NaN	NaN	40.5242	0.0885222
Dengue / QC	_VGSQYRLEDSVTYHC[Carbamidomethyl (C)]SR_	B4E1Z4	1.38535	1.38535	4.63608e-06	7.70847e-06	138	B4E1Z4	NaN	cDNA FLJ55673, highly similar to Complement factor B (EC 3.4.21.47)	B4E1Z4_HUMAN	1	161.236	2.61236	Dengue	QC	NaN	NaN	NaN	122.915	0.248972
Dengue / QC	_TDASDVKPC[Carbamidomethyl (C)]_	P02749	0.51558	0.51558	4.63812e-06	7.70968e-06	102	P02749	APOH	Beta-2-glycoprotein 1	APOH_HUMAN	1	42.9569	1.42957	Dengue	QC	NaN	NaN	NaN	89.0599	0.105376
Dengue / QC	_C[Carbamidomethyl (C)]QPVDC[Carbamidomethyl (C)]GIPESIENGKVEDPESTLFGSVIR_	P09871	1.89385	1.89385	4.64879e-06	7.72524e-06	46	P09871	C1S	Complement C1s subcomponent	C1S_HUMAN	1	271.626	3.71626	Dengue	QC	NaN	NaN	NaN	37.0426	0.363137
Dengue / QC	_GATTSPGVYELSSR_	Q9Y6R7	0.803097	0.803097	4.65525e-06	7.73379e-06	152	Q9Y6R7	FCGBP	IgGFc-binding protein	FCGBP_HUMAN	1	74.4842	1.74484	Dengue	QC	NaN	NaN	NaN	126.463	0.158458
Dengue / QC	_LGVYELLLK_	Q14624	0.30533	0.30533	4.65947e-06	7.73861e-06	136	Q14624	ITIH4	Inter-alpha-trypsin inhibitor heavy chain H4	ITIH4_HUMAN	1	23.5701	1.2357	Dengue	QC	NaN	NaN	NaN	102.073	0.089793
Dengue / QC	_ENQLEVLEVSWLHGLK_	P02750	0.441094	0.441094	4.73446e-06	7.85208e-06	136	P02750	LRG1	Leucine-rich alpha-2-glycoprotein	A2GL_HUMAN	1	35.7633	1.35763	Dengue	QC	NaN	NaN	NaN	97.3471	0.121878
Dengue / QC	_TQSSDGKAQMQSPA_	H0YAC1;P03952	0.514325	0.514325	4.78373e-06	7.92709e-06	80	H0YAC1;P03952	KLKB1	Plasma kallikrein (Fragment);Plasma kallikrein	H0YAC1_HUMAN;KLKB1_HUMAN	1	42.8326	1.42833	Dengue	QC	NaN	NaN	NaN	50.1392	0.121272
Dengue / QC	_VFREFHLHLRLPMSVR_	P0C0L5	0.688297	0.688297	4.7973e-06	7.9451e-06	100	P0C0L5	C4B	Complement C4-B	CO4B_HUMAN	1	61.1381	1.61138	Dengue	QC	NaN	NaN	NaN	85.2594	0.135318
Dengue / QC	_IIC[Carbamidomethyl (C)]DNTGITTVSK_	P05164;P05164-2;P05164-3	0.805626	0.805626	4.83791e-06	8.00786e-06	72	P05164;P05164-2;P05164-3	MPO	Myeloperoxidase;Isoform H14 of Myeloperoxidase;Isoform H7 of Myeloperoxidase	PERM_HUMAN	1	74.7904	1.7479	Dengue	QC	NaN	NaN	NaN	52.2976	0.172976
Dengue / QC	_ASGYTFTGYYMHWVR_	P23083	0.940084	0.940084	4.9252e-06	8.14547e-06	46	P23083	IGHV1-2	Immunoglobulin heavy variable 1-2	HV102_HUMAN	1	91.8639	1.91864	Dengue	QC	NaN	NaN	NaN	35.5785	0.247902
Dengue / QC	_TGESVEFVC[Carbamidomethyl (C)]K_	P08603	0.457197	0.457197	4.95705e-06	8.19124e-06	176	P08603	CFH	Complement factor H	CFAH_HUMAN	1	37.2872	1.37287	Dengue	QC	NaN	NaN	NaN	106.159	0.0794093
Dengue / QC	_GFPIKEDFLEQSEQLFGAKPVSLTGK_	P08697	0.332343	0.332343	4.95669e-06	8.19124e-06	130	P08697	SERPINF2	Alpha-2-antiplasmin	A2AP_HUMAN	1	25.9056	1.25906	Dengue	QC	NaN	NaN	NaN	102.411	0.0868836
Dengue / QC	_AHLDIAGSLEGHLR_	P04114	0.49253	0.49253	5.0149e-06	8.27754e-06	60	P04114	APOB	Apolipoprotein B-100	APOB_HUMAN	1	40.691	1.40691	Dengue	QC	NaN	NaN	NaN	54.56	0.114248
Dengue / QC	_SQETGDLDVGGLQETDKIIEVEEEQEDPYLNDR_	P23142	0.950489	0.950489	5.03251e-06	8.30195e-06	74	P23142	FBLN1	Fibulin-1	FBLN1_HUMAN	1	93.2528	1.93253	Dengue	QC	NaN	NaN	NaN	38.5887	0.133419
Dengue / QC	_LASVSVSR_	Q9Y6R7	1.58492	1.58492	5.09415e-06	8.39658e-06	30	Q9Y6R7	FCGBP	IgGFc-binding protein	FCGBP_HUMAN	1	199.992	2.99992	Dengue	QC	NaN	NaN	NaN	19.3178	0.266527
Dengue / QC	_ADDKETC[Carbamidomethyl (C)]FAEEGK_	P02768	-0.455927	0.455927	5.09388e-06	8.39658e-06	164	P02768	ALB	Serum albumin	ALBU_HUMAN	1	-27.0959	0.729041	Dengue	QC	NaN	NaN	NaN	54.3659	0.0871898
Dengue / QC	_SSGSLLNNAIK_	P01023	-0.458246	0.458246	5.17413e-06	8.51172e-06	176	P01023	A2M	Alpha-2-macroglobulin	A2MG_HUMAN	1	-27.2129	0.727871	Dengue	QC	NaN	NaN	NaN	83.887	0.0810809
Dengue / QC	_TPSC[Carbamidomethyl (C)]GDIC[Carbamidomethyl (C)]NFPPK_	P04003	-0.287988	0.287988	5.20238e-06	8.55581e-06	174	P04003	C4BPA	C4b-binding protein alpha chain	C4BPA_HUMAN	1	-18.0956	0.819044	Dengue	QC	NaN	NaN	NaN	84.0778	0.0597459
Dengue / QC	_NTLYLQMGSLR_	A0A075B6Q5	-0.609549	0.609549	5.21231e-06	8.56816e-06	102	A0A075B6Q5	IGHV3-64	Immunoglobulin heavy variable 3-64	HV364_HUMAN	1	-34.4599	0.655401	Dengue	QC	NaN	NaN	NaN	75.4004	0.110982
Dengue / QC	_LVVLPFPK_	Q9UGM5	-0.497782	0.497782	5.2292e-06	8.59271e-06	172	Q9UGM5	FETUB	Fetuin-B	FETUB_HUMAN	1	-29.1805	0.708195	Dengue	QC	NaN	NaN	NaN	59.6175	0.090235
Dengue / QC	_GQGTLSVVTMYHAK_	P01024	-0.304784	0.304784	5.24087e-06	8.60708e-06	176	P01024	C3	Complement C3	CO3_HUMAN	1	-19.0437	0.809563	Dengue	QC	NaN	NaN	NaN	75.9083	0.0558003
Dengue / QC	_NTGMETPTGVC[Carbamidomethyl (C)]AALAAAGVQPHSLDLSHNSLR_	P08571	0.327598	0.327598	5.27199e-06	8.65576e-06	140	P08571	CD14	Monocyte differentiation antigen CD14	CD14_HUMAN	1	25.4922	1.25492	Dengue	QC	NaN	NaN	NaN	91.7136	0.093722
Dengue / QC	_SLEDLQLTHNKITK_	P51884	0.541578	0.541578	5.27837e-06	8.66383e-06	126	P51884	LUM	Lumican	LUM_HUMAN	1	45.5564	1.45556	Dengue	QC	NaN	NaN	NaN	90.1157	0.104987
Dengue / QC	_SFTIEC[Carbamidomethyl (C)]R_	J3QQR8;J3QQX6;J3QRQ1;P13598	0.359682	0.359682	5.39486e-06	8.84517e-06	44	J3QQR8;J3QQX6;J3QRQ1;P13598	ICAM2	Intercellular adhesion molecule 2 (Fragment);Intercellular adhesion molecule 2 (Fragment);Intercellular adhesion molecule 2 (Fragment);Intercellular adhesion molecule 2	J3QQR8_HUMAN;J3QQX6_HUMAN;J3QRQ1_HUMAN;ICAM2_HUMAN	1	28.3143	1.28314	Dengue	QC	NaN	NaN	NaN	35.4743	0.121066
Dengue / QC	_NAEELKAR_	P06727	0.801664	0.801664	5.41012e-06	8.86771e-06	56	P06727	APOA4	Apolipoprotein A-IV	APOA4_HUMAN	1	74.3111	1.74311	Dengue	QC	NaN	NaN	NaN	41.0893	0.196287
Dengue / QC	_NFATSNK_	P04114	1.27618	1.27618	5.42902e-06	8.89622e-06	16	P04114	APOB	Apolipoprotein B-100	APOB_HUMAN	1	142.196	2.42196	Dengue	QC	NaN	NaN	NaN	9.54596	0.153126
Dengue / QC	_GISEQSLVVSGVQHQSTLELSEVGVEAAAATSIAMSR_	P08697	0.857365	0.857365	5.46815e-06	8.95037e-06	64	P08697	SERPINF2	Alpha-2-antiplasmin	A2AP_HUMAN	1	81.1727	1.81173	Dengue	QC	NaN	NaN	NaN	33.648	0.136668
Dengue / QC	_LVPFATELHER_	P06727	0.482304	0.482304	5.49752e-06	8.99095e-06	90	P06727	APOA4	Apolipoprotein A-IV	APOA4_HUMAN	1	39.6973	1.39697	Dengue	QC	NaN	NaN	NaN	79.7025	0.0997768
Dengue / QC	_TAFISDFAVTADGNAFIGDIKDKVTAWK_	P19827	0.801431	0.801431	5.52357e-06	9.02603e-06	84	P19827	ITIH1	Inter-alpha-trypsin inhibitor heavy chain H1	ITIH1_HUMAN	1	74.2829	1.74283	Dengue	QC	NaN	NaN	NaN	17.6041	0.121323
Dengue / QC	_LQVVPVAANQR_	A0A087X0I0;A0A140T8Y3;A0A140T8Z8;A0A140T9C0;A0A140T9L7;A0A140TA41;A0A140TA52;P22105;P22105-3;P22105-4	0.320589	0.320589	5.56873e-06	9.08972e-06	84	A0A087X0I0;A0A140T8Y3;A0A140T8Z8;A0A140T9C0;A0A140T9L7;A0A140TA41;A0A140TA52;P22105;P22105-3;P22105-4	TNXB	Tenascin-X;Tenascin-X;Tenascin-X (Fragment);Tenascin-X;Tenascin-X (Fragment);Tenascin-X;Tenascin-X;Tenascin-X;Isoform 4 of Tenascin-X;Isoform 5 of Tenascin-X	A0A087X0I0_HUMAN;A0A140T8Y3_HUMAN;A0A140T8Z8_HUMAN;A0A140T9C0_HUMAN;A0A140T9L7_HUMAN;A0A140TA41_HUMAN;A0A140TA52_HUMAN;TENX_HUMAN;TENX_HUMAN;TENX_HUMAN	1	24.884	1.24884	Dengue	QC	NaN	NaN	NaN	54.2251	0.157538
Dengue / QC	_VAAGAFQGLR_	P02750	-0.353265	0.353265	5.57432e-06	9.09633e-06	172	P02750	LRG1	Leucine-rich alpha-2-glycoprotein	A2GL_HUMAN	1	-21.7189	0.782811	Dengue	QC	NaN	NaN	NaN	115.153	0.079635
Dengue / QC	_MYYSAVDPTK_	P00450	-0.542221	0.542221	5.65072e-06	9.21589e-06	156	P00450	CP	Ceruloplasmin	CERU_HUMAN	1	-31.3287	0.686713	Dengue	QC	NaN	NaN	NaN	58.4635	0.103952
Dengue / QC	_LNLVATPLFLKPGIPYPIK_	P01031	0.656333	0.656333	5.67908e-06	9.25701e-06	46	P01031	C5	Complement C5	CO5_HUMAN	1	57.6071	1.57607	Dengue	QC	NaN	NaN	NaN	29.6763	0.140759
Dengue / QC	_FAVLQENVAWGNGR_	Q9Y6R7	1.22939	1.22939	5.68591e-06	9.26558e-06	38	Q9Y6R7	FCGBP	IgGFc-binding protein	FCGBP_HUMAN	1	134.468	2.34468	Dengue	QC	NaN	NaN	NaN	25.0968	0.23816
Dengue / QC	_DTLMISRTPEVTC[Carbamidomethyl (C)]VVVDVSHEDPEVK_	P01857	1.5152	1.5152	5.68981e-06	9.26937e-06	156	P01857	IGHG1	Immunoglobulin heavy constant gamma 1	IGHG1_HUMAN	1	185.839	2.85839	Dengue	QC	NaN	NaN	NaN	85.0082	0.244934
Dengue / QC	_TPC[Carbamidomethyl (C)]EEILVK_	P21333;P21333-2;Q5HY54	0.541986	0.541986	5.69871e-06	9.28129e-06	76	P21333;P21333-2;Q5HY54	FLNA	Filamin-A;Isoform 2 of Filamin-A;Filamin-A	FLNA_HUMAN;FLNA_HUMAN;Q5HY54_HUMAN	1	45.5976	1.45598	Dengue	QC	NaN	NaN	NaN	61.6907	0.112905
Dengue / QC	_GSPAINVAVHVFR_	P02766	0.421427	0.421427	5.79511e-06	9.42265e-06	164	P02766	TTR	Transthyretin	TTHY_HUMAN	1	33.9252	1.33925	Dengue	QC	NaN	NaN	NaN	150.719	0.0928123
Dengue / QC	_DFALLSLQVPLKDAK_	P0C0L5	0.276331	0.276331	5.84013e-06	9.47753e-06	172	P0C0L5	C4B	Complement C4-B	CO4B_HUMAN	1	21.1111	1.21111	Dengue	QC	NaN	NaN	NaN	130.48	0.0805548
Dengue / QC	_QSSSYSFFKEEIIYEC[Carbamidomethyl (C)]DKGYILVGQAK_	P04003	0.404321	0.404321	5.83861e-06	9.47753e-06	148	P04003	C4BPA	C4b-binding protein alpha chain	C4BPA_HUMAN	1	32.3466	1.32347	Dengue	QC	NaN	NaN	NaN	76.9476	0.0920905
Dengue / QC	_ARANLQSVPHASASRPR_	O14791;O14791-2	0.896884	0.896884	6.29634e-06	1.01507e-05	42	O14791;O14791-2	APOL1	Apolipoprotein L1;Isoform 2 of Apolipoprotein L1	APOL1_HUMAN	1	86.204	1.86204	Dengue	QC	NaN	NaN	NaN	37.9125	0.167612
Dengue / QC	_LTVGAAQVPAQLLVGALRVLAYSR_	P08571	0.969853	0.969853	6.36727e-06	1.0251e-05	52	P08571	CD14	Monocyte differentiation antigen CD14	CD14_HUMAN	1	95.8641	1.95864	Dengue	QC	NaN	NaN	NaN	23.6194	0.132423
Dengue / QC	_HSTIFENLANK_	P02787	-0.328771	0.328771	6.45474e-06	1.03748e-05	176	P02787	TF	Serotransferrin	TRFE_HUMAN	1	-20.3785	0.796215	Dengue	QC	NaN	NaN	NaN	104.755	0.0636292
Dengue / QC	_RGDAC[Carbamidomethyl (C)]EGDSGGPFVMK_	P00734	0.479698	0.479698	6.50755e-06	1.0454e-05	88	P00734	F2	Prothrombin	THRB_HUMAN	1	39.4451	1.39445	Dengue	QC	NaN	NaN	NaN	75.1623	0.119845
Dengue / QC	_VDFTLSSER_	P0C0L5	-0.315837	0.315837	6.52971e-06	1.04867e-05	176	P0C0L5	C4B	Complement C4-B	CO4B_HUMAN	1	-19.6615	0.803385	Dengue	QC	NaN	NaN	NaN	110.654	0.0661593
Dengue / QC	_HSTIFENLANKADR_	P02787	-0.414945	0.414945	6.5788e-06	1.05598e-05	176	P02787	TF	Serotransferrin	TRFE_HUMAN	1	-24.9952	0.750048	Dengue	QC	NaN	NaN	NaN	53.3164	0.0897439
Dengue / QC	_C[Carbamidomethyl (C)]QC[Carbamidomethyl (C)]DELC[Carbamidomethyl (C)]SYYQSC[Carbamidomethyl (C)]C[Carbamidomethyl (C)]TDYTAEC[Carbamidomethyl (C)]KPQVTR_	P04004	0.350172	0.350172	6.58385e-06	1.0565e-05	176	P04004	VTN	Vitronectin	VTNC_HUMAN	1	27.4712	1.27471	Dengue	QC	NaN	NaN	NaN	99.5766	0.0636005
Dengue / QC	_AAPSVTLFPPSSEELQANK_	P0DOY2	-0.452828	0.452828	6.6474e-06	1.06509e-05	176	P0DOY2	IGLC2	Immunoglobulin lambda constant 2	IGLC2_HUMAN	1	-26.9391	0.730609	Dengue	QC	NaN	NaN	NaN	93.7611	0.0844626
Dengue / QC	_YNPIPSVQLMGNGFHFLAGEPR_	P13671	0.769372	0.769372	6.78754e-06	1.08623e-05	64	P13671	C6	Complement component C6	CO6_HUMAN	1	70.4528	1.70453	Dengue	QC	NaN	NaN	NaN	29.2789	0.110916
Dengue / QC	_ADQVC[Carbamidomethyl (C)]INLR_	Q12805;Q12805-2;Q12805-4	0.420153	0.420153	6.90538e-06	1.10329e-05	166	Q12805;Q12805-2;Q12805-4	EFEMP1	EGF-containing fibulin-like extracellular matrix protein 1;Isoform 2 of EGF-containing fibulin-like extracellular matrix protein 1;Isoform 4 of EGF-containing fibulin-like extracellular matrix protein 1	FBLN3_HUMAN	1	33.807	1.33807	Dengue	QC	NaN	NaN	NaN	157.681	0.108999
Dengue / QC	_LEDMEQALSPSVFK_	P05155;P05155-3	0.566717	0.566717	7.09294e-06	1.13141e-05	74	P05155;P05155-3	SERPING1	Plasma protease C1 inhibitor;Isoform 3 of Plasma protease C1 inhibitor	IC1_HUMAN	1	48.1149	1.48115	Dengue	QC	NaN	NaN	NaN	51.9646	0.153352
Dengue / QC	_TAFISDFAVTADGNAFIGDIKDK_	P19827	1.76146	1.76146	7.09172e-06	1.13141e-05	12	P19827	ITIH1	Inter-alpha-trypsin inhibitor heavy chain H1	ITIH1_HUMAN	1	239.041	3.39041	Dengue	QC	NaN	NaN	NaN	6.0568	0.139562
Dengue / QC	_DFNIPGFPTVR_	O00391	0.514703	0.514703	7.17185e-06	1.14214e-05	56	O00391	QSOX1	Sulfhydryl oxidase 1	QSOX1_HUMAN	1	42.87	1.4287	Dengue	QC	NaN	NaN	NaN	46.3219	0.130855
Dengue / QC	_MVETTAYALLTSLNLK_	P01031	0.60291	0.60291	7.1899e-06	1.14378e-05	96	P01031	C5	Complement C5	CO5_HUMAN	1	51.8777	1.51878	Dengue	QC	NaN	NaN	NaN	57.3037	0.159274
Dengue / QC	_KAPDAGGC[Carbamidomethyl (C)]LHADPDLGVLC[Carbamidomethyl (C)]PTGC[Carbamidomethyl (C)]QLQEALLQQERPIR_	P02675	1.68614	1.68614	7.19335e-06	1.14402e-05	128	P02675	FGB	Fibrinogen beta chain	FIBB_HUMAN	1	221.794	3.21794	Dengue	QC	NaN	NaN	NaN	114.26	0.355935
Dengue / QC	_VLSPADKTNVK_	P69905	0.567852	0.567852	7.20148e-06	1.14469e-05	172	P69905	HBA1	Hemoglobin subunit alpha	HBA_HUMAN	1	48.2315	1.48231	Dengue	QC	NaN	NaN	NaN	158.32	0.147751
Dengue / QC	_IAQWQSLK_	P20742	2.71908	2.71908	7.20068e-06	1.14469e-05	66	P20742	PZP	Pregnancy zone protein	PZP_HUMAN	1	558.453	6.58453	Dengue	QC	NaN	NaN	NaN	50.0237	0.536145
Dengue / QC	_KYSDASDC[Carbamidomethyl (C)]HGEDSQAFC[Carbamidomethyl (C)]EK_	P01023	-0.547044	0.547044	7.25908e-06	1.1526e-05	176	P01023	A2M	Alpha-2-macroglobulin	A2MG_HUMAN	1	-31.5579	0.684421	Dengue	QC	NaN	NaN	NaN	50.5955	0.116139
Dengue / QC	_TRFVYHLSDLC[Carbamidomethyl (C)]KK_	P01591	1.63226	1.63226	7.3246e-06	1.16238e-05	78	P01591	JCHAIN	Immunoglobulin J chain	IGJ_HUMAN	1	209.998	3.09998	Dengue	QC	NaN	NaN	NaN	66.2239	0.270248
Dengue / QC	_NPDSSTTGPWC[Carbamidomethyl (C)]YTTDPTVRR_	P00734	0.269067	0.269067	7.33276e-06	1.16308e-05	166	P00734	F2	Prothrombin	THRB_HUMAN	1	20.5028	1.20503	Dengue	QC	NaN	NaN	NaN	113.904	0.0524092
Dengue / QC	_HLSLLTTLSNRVC[Carbamidomethyl (C)]SQYAAYGEKK_	P02774;P02774-3	0.571198	0.571198	7.3493e-06	1.16473e-05	94	P02774;P02774-3	GC	Vitamin D-binding protein;Isoform 3 of Vitamin D-binding protein	VTDB_HUMAN	1	48.5756	1.48576	Dengue	QC	NaN	NaN	NaN	75.7886	0.129302
Dengue / QC	_KC[Carbamidomethyl (C)]DPTEVELDNQIVTATQSNIC[Carbamidomethyl (C)]DEDSATETC[Carbamidomethyl (C)]YTYDR_	P01591	1.07971	1.07971	7.37594e-06	1.16863e-05	40	P01591	JCHAIN	Immunoglobulin J chain	IGJ_HUMAN	1	111.361	2.11361	Dengue	QC	NaN	NaN	NaN	35.8556	0.184617
Dengue / QC	_SGVQM[Oxidation (M)]NTNFFHESGLEAHVALK_	P04114	-0.202951	0.202951	7.47457e-06	1.18394e-05	48	P04114	APOB	Apolipoprotein B-100	APOB_HUMAN	1	-13.1228	0.868772	Dengue	QC	NaN	NaN	NaN	30.7193	0.0806228
Dengue / QC	_DTLTSRPAQGVVTTLENVSPPRR_	P02751;P02751-15;P02751-3;P02751-7	0.585652	0.585652	7.53576e-06	1.19331e-05	90	P02751;P02751-15;P02751-3;P02751-7	FN1	Fibronectin;Isoform 15 of Fibronectin;Isoform 3 of Fibronectin;Isoform 7 of Fibronectin	FINC_HUMAN	1	50.0717	1.50072	Dengue	QC	NaN	NaN	NaN	70.1066	0.105518
Dengue / QC	_LLLQM[Oxidation (M)]DSSATAYGSTVSKR_	P04114	0.750923	0.750923	7.57471e-06	1.1989e-05	50	P04114	APOB	Apolipoprotein B-100	APOB_HUMAN	1	68.2869	1.68287	Dengue	QC	NaN	NaN	NaN	35.5041	0.180758
Dengue / QC	_ETEGLRQEMSKDLEEVK_	P02647	0.709581	0.709581	7.58525e-06	1.19922e-05	74	P02647	APOA1	Apolipoprotein A-I	APOA1_HUMAN	1	63.5329	1.63533	Dengue	QC	NaN	NaN	NaN	60.3986	0.114458
Dengue / QC	_FSGVPDRFSGSGAGTDFTLK_	A0A0C4DH68	1.11376	1.11376	7.6055e-06	1.20209e-05	48	A0A0C4DH68	IGKV2-24	Immunoglobulin kappa variable 2-24	KV224_HUMAN	1	116.409	2.16409	Dengue	QC	NaN	NaN	NaN	39.434	0.16655
Dengue / QC	_NYC[Carbamidomethyl (C)]RNPDGDVGGPWC[Carbamidomethyl (C)]YTTNPR_	P00747	0.795259	0.795259	7.61533e-06	1.20332e-05	140	P00747	PLG	Plasminogen	PLMN_HUMAN	1	73.5389	1.73539	Dengue	QC	NaN	NaN	NaN	132.321	0.160485
Dengue / QC	_ASVDSGSSEEQGGSSR_	P01833	2.82027	2.82027	7.68373e-06	1.21316e-05	14	P01833	PIGR	Polymeric immunoglobulin receptor	PIGR_HUMAN	1	606.293	7.06293	Dengue	QC	NaN	NaN	NaN	7.95793	0.271177
Dengue / QC	_C[Carbamidomethyl (C)]LVNLIEKVASYGVKPR_	B4E1Z4	0.332872	0.332872	7.72384e-06	1.21851e-05	102	B4E1Z4	NaN	cDNA FLJ55673, highly similar to Complement factor B (EC 3.4.21.47)	B4E1Z4_HUMAN	1	25.9518	1.25952	Dengue	QC	NaN	NaN	NaN	58.0179	0.103026
Dengue / QC	_DTANLFPQTSLTLHM[Oxidation (M)]WPDTEGTFNVEC[Carbamidomethyl (C)]LTTDHYTGGMK_	P00450	0.38789	0.38789	7.90207e-06	1.24496e-05	100	P00450	CP	Ceruloplasmin	CERU_HUMAN	1	30.8479	1.30848	Dengue	QC	NaN	NaN	NaN	61.2595	0.188116
Dengue / QC	_FSPATHPSEGLEENYC[Carbamidomethyl (C)]RNPDNDPQGPWC[Carbamidomethyl (C)]YTTDPEKR_	P00747	0.336326	0.336326	7.9663e-06	1.25373e-05	174	P00747	PLG	Plasminogen	PLMN_HUMAN	1	26.2537	1.26254	Dengue	QC	NaN	NaN	NaN	96.3864	0.0648385
Dengue / QC	_TIYTPGSTVLYRIFTVNHKLLPVGR_	P01024	0.637421	0.637421	7.97967e-06	1.2555e-05	164	P01024	C3	Complement C3	CO3_HUMAN	1	55.5545	1.55555	Dengue	QC	NaN	NaN	NaN	102.263	0.116454
Dengue / QC	_GLEEELQFSLGSK_	P0C0L5	0.541546	0.541546	8.0062e-06	1.259e-05	176	P0C0L5	C4B	Complement C4-B	CO4B_HUMAN	1	45.5531	1.45553	Dengue	QC	NaN	NaN	NaN	141.77	0.0936736
Dengue / QC	_SVSSDLQPYLQTLPVTTEIDSFADIDYSLVEAPR_	P18428	1.37659	1.37659	8.02885e-06	1.26155e-05	66	P18428	LBP	Lipopolysaccharide-binding protein	LBP_HUMAN	1	159.653	2.59653	Dengue	QC	NaN	NaN	NaN	19.8213	0.224626
Dengue / QC	_GQESSTDIKAPEGFAVR_	Q9NZP8	-0.410884	0.410884	8.04782e-06	1.2642e-05	138	Q9NZP8	C1RL	Complement C1r subcomponent-like protein	C1RL_HUMAN	1	-24.7838	0.752162	Dengue	QC	NaN	NaN	NaN	57.1225	0.0796119
Dengue / QC	_QAPGQELGWMGR_	A0A075B7D0	-0.384017	0.384017	8.12083e-06	1.27465e-05	176	A0A075B7D0	IGHV1OR15-1	Immunoglobulin heavy variable 1/OR15-1 (non-functional) (Fragment)	A0A075B7D0_HUMAN	1	-23.3699	0.766301	Dengue	QC	NaN	NaN	NaN	125.518	0.0783575
Dengue / QC	_ASEQAELPR_	Q86UD1	0.454152	0.454152	8.14661e-06	1.27835e-05	66	Q86UD1	OAF	Out at first protein homolog	OAF_HUMAN	1	36.9977	1.36998	Dengue	QC	NaN	NaN	NaN	60.1003	0.106048
Dengue / QC	_TMQALPYSTVGNSNNYLHLSVLRTELRPGETLNVNFLLR_	P01024	1.30305	1.30305	8.23182e-06	1.29069e-05	28	P01024	C3	Complement C3	CO3_HUMAN	1	146.75	2.4675	Dengue	QC	NaN	NaN	NaN	20.3994	0.225493
Dengue / QC	_AVLQLNEEGVDTAGSTGVTLNLTSKPIILR_	P08185	0.78259	0.78259	8.35934e-06	1.30964e-05	46	P08185	SERPINA6	Corticosteroid-binding globulin	CBG_HUMAN	1	72.0216	1.72022	Dengue	QC	NaN	NaN	NaN	29.028	0.157552
Dengue / QC	_DMIC[Carbamidomethyl (C)]AGEKEGGKDAC[Carbamidomethyl (C)]AGDSGGPMVTLNR_	P48740	0.839503	0.839503	8.39349e-06	1.314e-05	24	P48740	MASP1	Mannan-binding lectin serine protease 1	MASP1_HUMAN	1	78.9433	1.78943	Dengue	QC	NaN	NaN	NaN	16.2156	0.26704
Dengue / QC	_SNLC[Carbamidomethyl (C)]ALC[Carbamidomethyl (C)]IGDEQGENK_	E7ER44;P02788	0.992937	0.992937	8.49604e-06	1.32858e-05	56	E7ER44;P02788	LTF	Lactotransferrin	E7ER44_HUMAN;TRFL_HUMAN	1	99.0233	1.99023	Dengue	QC	NaN	NaN	NaN	47.4945	0.20151
Dengue / QC	_AEDTAVYYC[Carbamidomethyl (C)]AK_	A0A0J9YY99	-0.371681	0.371681	8.5719e-06	1.33902e-05	176	A0A0J9YY99	NaN	Uncharacterized protein (Fragment)	A0A0J9YY99_HUMAN	1	-22.7119	0.772881	Dengue	QC	NaN	NaN	NaN	64.8094	0.0791777
Dengue / QC	_FISLGEAC[Carbamidomethyl (C)]KK_	P01024	0.238351	0.238351	8.58816e-06	1.34085e-05	108	P01024	C3	Complement C3	CO3_HUMAN	1	17.9643	1.17964	Dengue	QC	NaN	NaN	NaN	94.4916	0.115579
Dengue / QC	_LADFALLC[Carbamidomethyl (C)]LDGK_	E7ER44;P02788	1.10708	1.10708	8.58773e-06	1.34085e-05	56	E7ER44;P02788	LTF	Lactotransferrin	E7ER44_HUMAN;TRFL_HUMAN	1	115.41	2.1541	Dengue	QC	NaN	NaN	NaN	42.8003	0.238566
Dengue / QC	_ASQSISSYLNWYQQK_	P01597;P04432	1.11149	1.11149	8.64364e-06	1.34879e-05	36	P01597;P04432	IGKV1-39;IGKV1D-39	Immunoglobulin kappa variable 1-39;Immunoglobulin kappa variable 1D-39	KV139_HUMAN;KVD39_HUMAN	1	116.069	2.16069	Dengue	QC	NaN	NaN	NaN	27.7941	0.193826
Dengue / QC	_AYIFIDEAHITQALIWLSQRQK_	P01023	1.04287	1.04287	8.66986e-06	1.35253e-05	68	P01023	A2M	Alpha-2-macroglobulin	A2MG_HUMAN	1	106.032	2.06032	Dengue	QC	NaN	NaN	NaN	43.2104	0.193079
Dengue / QC	_GRPKLLQLPLGFLYVHHTYVPAPPC[Carbamidomethyl (C)]TDFTR_	Q96PD5	1.27594	1.27594	8.72185e-06	1.35956e-05	76	Q96PD5	PGLYRP2	N-acetylmuramoyl-L-alanine amidase	PGRP2_HUMAN	1	142.157	2.42157	Dengue	QC	NaN	NaN	NaN	58.4779	0.22745
Dengue / QC	_TQFNNNEYSQDLDAYNTKDKIGVELTGR_	P04114	0.578161	0.578161	8.94528e-06	1.39364e-05	136	P04114	APOB	Apolipoprotein B-100	APOB_HUMAN	1	49.2945	1.49295	Dengue	QC	NaN	NaN	NaN	120.414	0.148523
Dengue / QC	_ALSGFSLQSC[Carbamidomethyl (C)]R_	P03951	1.26506	1.26506	8.97914e-06	1.39781e-05	48	P03951	F11	Coagulation factor XI	FA11_HUMAN	1	140.337	2.40337	Dengue	QC	NaN	NaN	NaN	17.966	0.161013
Dengue / QC	_AEAQAQYSAAVAK_	Q14624	-0.491594	0.491594	9.21177e-06	1.43137e-05	176	Q14624	ITIH4	Inter-alpha-trypsin inhibitor heavy chain H4	ITIH4_HUMAN	1	-28.8761	0.711239	Dengue	QC	NaN	NaN	NaN	45.4865	0.110627
Dengue / QC	_GFYFSRPASR_	P01344;P01344-3	0.312066	0.312066	9.25375e-06	1.43752e-05	136	P01344;P01344-3	IGF2	Insulin-like growth factor II;Isoform 3 of Insulin-like growth factor II	IGF2_HUMAN	1	24.1484	1.24148	Dengue	QC	NaN	NaN	NaN	67.3036	0.0892984
Dengue / QC	_GKFC[Carbamidomethyl (C)]EIGSDDC[Carbamidomethyl (C)]YVGDGYSYR_	Q14520;Q14520-2	0.927925	0.927925	9.38701e-06	1.45707e-05	62	Q14520;Q14520-2	HABP2	Hyaluronan-binding protein 2;Isoform 2 of Hyaluronan-binding protein 2	HABP2_HUMAN	1	90.2538	1.90254	Dengue	QC	NaN	NaN	NaN	51.7658	0.161259
Dengue / QC	_FNHLGHIFTFTPQNNEFQLQLSPK_	P04275	0.725262	0.725262	9.63263e-06	1.49283e-05	58	P04275	VWF	von Willebrand factor	VWF_HUMAN	1	65.3201	1.6532	Dengue	QC	NaN	NaN	NaN	48.6252	0.212032
Dengue / QC	_C[Carbamidomethyl (C)]EELQGQK_	P27918	0.869814	0.869814	9.72226e-06	1.50472e-05	28	P27918	CFP	Properdin	PROP_HUMAN	1	82.7428	1.82743	Dengue	QC	NaN	NaN	NaN	18.9504	0.119244
Dengue / QC	_NSADNKVVC[Carbamidomethyl (C)]SC[Carbamidomethyl (C)]TEGYR_	P00740	0.662701	0.662701	9.84614e-06	1.5223e-05	96	P00740	F9	Coagulation factor IX	FA9_HUMAN	1	58.3043	1.58304	Dengue	QC	NaN	NaN	NaN	87.5901	0.129729
Dengue / QC	_ISEITNIVSK_	P20742	3.00659	3.00659	9.96176e-06	1.53857e-05	52	P20742	PZP	Pregnancy zone protein	PZP_HUMAN	1	703.663	8.03663	Dengue	QC	NaN	NaN	NaN	38.0432	0.551825
Dengue / QC	_MLEEIMKYEASILTHDSSIR_	P02679;P02679-2	3.44786	3.44786	9.99047e-06	1.54179e-05	38	P02679;P02679-2	FGG	Fibrinogen gamma chain;Isoform Gamma-A of Fibrinogen gamma chain	FIBG_HUMAN	1	991.209	10.9121	Dengue	QC	NaN	NaN	NaN	20.4003	0.730021
Dengue / QC	_SLHTLFGDK[Hex]LC[Carbamidomethyl (C)]TVATLRETYGEMADC[Carbamidomethyl (C)]C[Carbamidomethyl (C)]AK_	P02768	-0.24311	0.24311	1.00341e-05	1.54731e-05	14	P02768	ALB	Serum albumin	ALBU_HUMAN	1	-15.5078	0.844922	Dengue	QC	NaN	NaN	NaN	5.41103	0.240154
Dengue / QC	_FPEVDVLTK_	P04114	-0.447741	0.447741	1.00787e-05	1.55377e-05	172	P04114	APOB	Apolipoprotein B-100	APOB_HUMAN	1	-26.681	0.73319	Dengue	QC	NaN	NaN	NaN	62.1581	0.0851379
Dengue / QC	_GHFSISIPVK_	P01023	-0.409868	0.409868	1.01185e-05	1.5591e-05	176	P01023	A2M	Alpha-2-macroglobulin	A2MG_HUMAN	1	-24.7308	0.752692	Dengue	QC	NaN	NaN	NaN	116.859	0.084974
Dengue / QC	_RQDGSVDFFR_	O75636	-0.620295	0.620295	1.01776e-05	1.56779e-05	160	O75636	FCN3	Ficolin-3	FCN3_HUMAN	1	-34.9462	0.650538	Dengue	QC	NaN	NaN	NaN	44.1476	0.117955
Dengue / QC	_RDTANLFPQTSLTLHMWPDTEGTFNVEC[Carbamidomethyl (C)]LTTDHYTGGMK_	P00450	0.652976	0.652976	1.01899e-05	1.56927e-05	166	P00450	CP	Ceruloplasmin	CERU_HUMAN	1	57.2408	1.57241	Dengue	QC	NaN	NaN	NaN	104.002	0.119981
Dengue / QC	_NGQWSEPPKC[Carbamidomethyl (C)]LHPC[Carbamidomethyl (C)]VISR_	P08603	0.676392	0.676392	1.02127e-05	1.57215e-05	158	P08603	CFH	Complement factor H	CFAH_HUMAN	1	59.8138	1.59814	Dengue	QC	NaN	NaN	NaN	126.096	0.101155
Dengue / QC	_IQALQQQADEAEDRAQGLQR_	P67936	0.866689	0.866689	1.04709e-05	1.6094e-05	56	P67936	TPM4	Tropomyosin alpha-4 chain	TPM4_HUMAN	1	82.3473	1.82347	Dengue	QC	NaN	NaN	NaN	44.3316	0.157193
Dengue / QC	_SDVM[Oxidation (M)]YTDWK_	P19652	-0.511235	0.511235	1.06812e-05	1.6398e-05	162	P19652	ORM2	Alpha-1-acid glycoprotein 2	A1AG2_HUMAN	1	-29.8378	0.701622	Dengue	QC	NaN	NaN	NaN	50.7202	0.107125
Dengue / QC	_YTKKVPQVSTPTLVEVSR_	P02768	1.59415	1.59415	1.07725e-05	1.65208e-05	176	P02768	ALB	Serum albumin	ALBU_HUMAN	1	201.916	3.01916	Dengue	QC	NaN	NaN	NaN	163.207	0.296798
Dengue / QC	_GLEWVGR_	A0A0B4J1Y9	-0.309158	0.309158	1.08452e-05	1.66236e-05	174	A0A0B4J1Y9	IGHV3-72	Immunoglobulin heavy variable 3-72	HV372_HUMAN	1	-19.2887	0.807113	Dengue	QC	NaN	NaN	NaN	85.2675	0.0699181
Dengue / QC	_EQPGVYTK_	H0YAC1;P03952	0.26593	0.26593	1.08924e-05	1.66829e-05	94	H0YAC1;P03952	KLKB1	Plasma kallikrein (Fragment);Plasma kallikrein	H0YAC1_HUMAN;KLKB1_HUMAN	1	20.2411	1.20241	Dengue	QC	NaN	NaN	NaN	56.346	0.0785129
Dengue / QC	_ATWSGAVLAGR_	P04217	-0.483942	0.483942	1.09041e-05	1.66965e-05	174	P04217	A1BG	Alpha-1B-glycoprotein	A1BG_HUMAN	1	-28.4979	0.715021	Dengue	QC	NaN	NaN	NaN	51.5547	0.102064
Dengue / QC	_VKENFDK_	P02753;Q5VY30	1.06484	1.06484	1.09091e-05	1.66998e-05	112	P02753;Q5VY30	RBP4	Retinol-binding protein 4;Retinol binding protein 4, plasma, isoform CRA_b	RET4_HUMAN;Q5VY30_HUMAN	1	109.194	2.09194	Dengue	QC	NaN	NaN	NaN	63.2493	0.166553
Dengue / QC	_VFSNGADLSGVTEEAPLK_	P01009	-0.526185	0.526185	1.09595e-05	1.67727e-05	168	P01009	SERPINA1	Alpha-1-antitrypsin	A1AT_HUMAN	1	-30.5612	0.694388	Dengue	QC	NaN	NaN	NaN	104.198	0.0963537
Dengue / QC	_TPEVTC[Carbamidomethyl (C)]VVVDVSQEDPEVQFNWYVDGVEVHNAK_	P01861	0.753675	0.753675	1.11647e-05	1.70467e-05	16	P01861	IGHG4	Immunoglobulin heavy constant gamma 4	IGHG4_HUMAN	1	68.6082	1.68608	Dengue	QC	NaN	NaN	NaN	8.32955	0.214381
Dengue / QC	_QKVEPLR_	P02647	0.40924	0.40924	1.11712e-05	1.70523e-05	122	P02647	APOA1	Apolipoprotein A-I	APOA1_HUMAN	1	32.7986	1.32799	Dengue	QC	NaN	NaN	NaN	52.0243	0.138069
Dengue / QC	_TLQELKK_	P04114	1.31058	1.31058	1.14687e-05	1.74929e-05	24	P04114	APOB	Apolipoprotein B-100	APOB_HUMAN	1	148.042	2.48042	Dengue	QC	NaN	NaN	NaN	15.4288	0.186715
Dengue / QC	_LDTLAQEVALLKEQQALQTVC[Carbamidomethyl (C)]LK_	E9PHK0;P05452	0.314312	0.314312	1.15255e-05	1.75704e-05	38	E9PHK0;P05452	CLEC3B	Tetranectin	E9PHK0_HUMAN;TETN_HUMAN	1	24.3419	1.24342	Dengue	QC	NaN	NaN	NaN	25.7242	0.104853
Dengue / QC	_LLDLVFLLDGSSR_	P04275	0.779738	0.779738	1.16016e-05	1.76726e-05	34	P04275	VWF	von Willebrand factor	VWF_HUMAN	1	71.6819	1.71682	Dengue	QC	NaN	NaN	NaN	16.692	0.167352
Dengue / QC	_C[Carbamidomethyl (C)]GLVPVLAENYK_	E7ER44;P02788	0.943164	0.943164	1.16156e-05	1.76868e-05	50	E7ER44;P02788	LTF	Lactotransferrin	E7ER44_HUMAN;TRFL_HUMAN	1	92.2741	1.92274	Dengue	QC	NaN	NaN	NaN	34.4354	0.210678
Dengue / QC	_RGYQLSDVDGVTC[Carbamidomethyl (C)]EDIDEC[Carbamidomethyl (C)]ALPTGGHIC[Carbamidomethyl (C)]SYR_	P23142	0.85455	0.85455	1.16169e-05	1.76868e-05	128	P23142	FBLN1	Fibulin-1	FBLN1_HUMAN	1	80.8195	1.80819	Dengue	QC	NaN	NaN	NaN	100.594	0.256375
Dengue / QC	_SLKYNPVVIDFEMQPIHEVLR_	P07357	0.691417	0.691417	1.16442e-05	1.77192e-05	132	P07357	C8A	Complement component C8 alpha chain	CO8A_HUMAN	1	61.4869	1.61487	Dengue	QC	NaN	NaN	NaN	107.758	0.1595
Dengue / QC	_DNSKNTLYLQMNSLR_	A0A0J9YVT0;P0DP02	-0.483455	0.483455	1.17077e-05	1.78067e-05	176	A0A0J9YVT0;P0DP02	IGHV3-33;IGHV3-30-3	Immunoglobulin heavy variable 3-33 (Fragment);Immunoglobulin heavy variable 3-30-3	A0A0J9YVT0_HUMAN;HVC33_HUMAN	1	-28.4737	0.715263	Dengue	QC	NaN	NaN	NaN	72.5416	0.0917359
Dengue / QC	_GSFALSFPVESDVAPIAR_	P20742	1.28374	1.28374	1.17285e-05	1.78336e-05	126	P20742	PZP	Pregnancy zone protein	PZP_HUMAN	1	143.47	2.4347	Dengue	QC	NaN	NaN	NaN	91.0197	0.280213
Dengue / QC	_MNFKQELNGNTK_	P04114	0.845957	0.845957	1.18368e-05	1.79843e-05	108	P04114	APOB	Apolipoprotein B-100	APOB_HUMAN	1	79.7456	1.79746	Dengue	QC	NaN	NaN	NaN	74.1415	0.13058
Dengue / QC	_ANSFLGEK_	A0A140TA49	0.368382	0.368382	1.20658e-05	1.83039e-05	122	A0A140TA49	C4A	Complement C4-A	A0A140TA49_HUMAN	1	29.0905	1.2909	Dengue	QC	NaN	NaN	NaN	61.233	0.102509
Dengue / QC	_LTITKDTSK_	P01817	-0.934704	0.934704	1.21704e-05	1.84341e-05	86	P01817	IGHV2-5	Immunoglobulin heavy variable 2-5	HV205_HUMAN	1	-47.685	0.52315	Dengue	QC	NaN	NaN	NaN	19.2541	0.178177
Dengue / QC	_RLLC[Carbamidomethyl (C)]NGDNDC[Carbamidomethyl (C)]GDQSDEANC[Carbamidomethyl (C)]RR_	P07358	1.41741	1.41741	1.22123e-05	1.84833e-05	24	P07358	C8B	Complement component C8 beta chain	CO8B_HUMAN	1	167.106	2.67106	Dengue	QC	NaN	NaN	NaN	17.691	0.395804
Dengue / QC	_VQSTELC[Carbamidomethyl (C)]AGHLAGGTDSC[Carbamidomethyl (C)]QGDSGGPLVC[Carbamidomethyl (C)]FEKDK_	P00747	0.211329	0.211329	1.2224e-05	1.84963e-05	128	P00747	PLG	Plasminogen	PLMN_HUMAN	1	15.7754	1.15775	Dengue	QC	NaN	NaN	NaN	77.3262	0.0541912
Dengue / QC	_VVWC[Carbamidomethyl (C)]AVGEQELR_	E7ER44;P02788	1.1912	1.1912	1.23496e-05	1.86623e-05	64	E7ER44;P02788	LTF	Lactotransferrin	E7ER44_HUMAN;TRFL_HUMAN	1	128.343	2.28343	Dengue	QC	NaN	NaN	NaN	40.402	0.239721
Dengue / QC	_YVGGQEHFAHLLILRDTK_	P02763	1.17546	1.17546	1.24903e-05	1.88508e-05	148	P02763	ORM1	Alpha-1-acid glycoprotein 1	A1AG1_HUMAN	1	125.865	2.25865	Dengue	QC	NaN	NaN	NaN	134.74	0.228325
Dengue / QC	_MKDGLC[Carbamidomethyl (C)]VPRK_	O95445	1.51166	1.51166	1.28152e-05	1.93015e-05	18	O95445	APOM	Apolipoprotein M	APOM_HUMAN	1	185.138	2.85138	Dengue	QC	NaN	NaN	NaN	11.5611	0.188566
Dengue / QC	_EPGLQIWR_	P06396	0.304872	0.304872	1.28457e-05	1.93424e-05	96	P06396	GSN	Gelsolin	GELS_HUMAN	1	23.5309	1.23531	Dengue	QC	NaN	NaN	NaN	65.2216	0.0614831
Dengue / QC	_EGQEC[Carbamidomethyl (C)]GVYTPNC[Carbamidomethyl (C)]APGLQC[Carbamidomethyl (C)]HPPKDDEAPLR_	F8VYK9;P24592	1.40172	1.40172	1.28732e-05	1.9374e-05	20	F8VYK9;P24592	IGFBP6	Insulin-like growth factor-binding protein 6	F8VYK9_HUMAN;IBP6_HUMAN	1	164.216	2.64216	Dengue	QC	NaN	NaN	NaN	13.8946	0.264009
Dengue / QC	_GADFQC[Carbamidomethyl (C)]FQQAR_	H7BXV5;H7C457;P39060;P39060-1;P39060-2	1.67106	1.67106	1.29225e-05	1.94332e-05	20	H7BXV5;H7C457;P39060;P39060-1;P39060-2	COL18A1	Collagen alpha-1(XVIII) chain (Fragment);Collagen alpha-1(XVIII) chain (Fragment);Collagen alpha-1(XVIII) chain;Isoform 2 of Collagen alpha-1(XVIII) chain;Isoform 3 of Collagen alpha-1(XVIII) chain	H7BXV5_HUMAN;H7C457_HUMAN;COIA1_HUMAN;COIA1_HUMAN;COIA1_HUMAN	1	218.448	3.18448	Dengue	QC	NaN	NaN	NaN	9.73755	0.244364
Dengue / QC	_TC[Carbamidomethyl (C)]NHPVPQHGGPFC[Carbamidomethyl (C)]AGDATR_	P27918	0.471587	0.471587	1.29614e-05	1.94818e-05	140	P27918	CFP	Properdin	PROP_HUMAN	1	38.6634	1.38663	Dengue	QC	NaN	NaN	NaN	73.8772	0.126698
Dengue / QC	_EVTKEVVTSEDGSDC[Carbamidomethyl (C)]PEAM[Oxidation (M)]DLGTLSGIGTLDGFR_	P02671	2.26349	2.26349	1.29842e-05	1.95111e-05	78	P02671	FGA	Fibrinogen alpha chain	FIBA_HUMAN	1	380.153	4.80153	Dengue	QC	NaN	NaN	NaN	32.3053	0.745363
Dengue / QC	_STVELFKFQEEEKSLLHLK_	P27169	0.646389	0.646389	1.29906e-05	1.95157e-05	50	P27169	PON1	Serum paraoxonase/arylesterase 1	PON1_HUMAN	1	56.5245	1.56525	Dengue	QC	NaN	NaN	NaN	19.2917	0.135938
Dengue / QC	_MLADAPPQDPSC[Carbamidomethyl (C)]C[Carbamidomethyl (C)]SGALYYGSK_	P19823	0.324053	0.324053	1.31776e-05	1.97714e-05	176	P19823	ITIH2	Inter-alpha-trypsin inhibitor heavy chain H2	ITIH2_HUMAN	1	25.1843	1.25184	Dengue	QC	NaN	NaN	NaN	130.392	0.0663792
Dengue / QC	_DPTPEQTHR_	P08697	0.501198	0.501198	1.32281e-05	1.98371e-05	110	P08697	SERPINF2	Alpha-2-antiplasmin	A2AP_HUMAN	1	41.5388	1.41539	Dengue	QC	NaN	NaN	NaN	58.2747	0.118822
Dengue / QC	_YVVVSHTAGSSC[Carbamidomethyl (C)]NTPASC[Carbamidomethyl (C)]QQQAR_	O75594	1.41871	1.41871	1.32762e-05	1.9894e-05	22	O75594	PGLYRP1	Peptidoglycan recognition protein 1	PGRP1_HUMAN	1	167.346	2.67346	Dengue	QC	NaN	NaN	NaN	14.9432	0.25878
Dengue / QC	_NWETEITAQPDGGKTENC[Carbamidomethyl (C)]AVLSGAANGK_	E9PHK0;P05452	0.336793	0.336793	1.33576e-05	1.99905e-05	124	E9PHK0;P05452	CLEC3B	Tetranectin	E9PHK0_HUMAN;TETN_HUMAN	1	26.2946	1.26295	Dengue	QC	NaN	NaN	NaN	96.257	0.0650906
Dengue / QC	_YIETDPANRDRR_	P06396	1.66683	1.66683	1.3378e-05	2.00108e-05	32	P06396	GSN	Gelsolin	GELS_HUMAN	1	217.517	3.17517	Dengue	QC	NaN	NaN	NaN	20.7508	0.287922
Dengue / QC	_IDITLSSVK_	Q08380	0.958783	0.958783	1.35184e-05	2.02004e-05	62	Q08380	LGALS3BP	Galectin-3-binding protein	LG3BP_HUMAN	1	94.367	1.94367	Dengue	QC	NaN	NaN	NaN	42.9178	0.208827
Dengue / QC	_DNPMYYC[Carbamidomethyl (C)]NKK_	O75882;O75882-2;O75882-3	0.334904	0.334904	1.36928e-05	2.04248e-05	122	O75882;O75882-2;O75882-3	ATRN	Attractin;Isoform 2 of Attractin;Isoform 3 of Attractin	ATRN_HUMAN	1	26.1294	1.26129	Dengue	QC	NaN	NaN	NaN	80.2536	0.0809818
Dengue / QC	_SRLSNLIK_	P02774;P02774-3	0.877658	0.877658	1.37187e-05	2.04529e-05	118	P02774;P02774-3	GC	Vitamin D-binding protein;Isoform 3 of Vitamin D-binding protein	VTDB_HUMAN	1	83.739	1.83739	Dengue	QC	NaN	NaN	NaN	55.7479	0.15315
Dengue / QC	_NPFVFAPTLLTVAVHFEEVAK_	P43652	0.721783	0.721783	1.38105e-05	2.05743e-05	56	P43652	AFM	Afamin	AFAM_HUMAN	1	64.9219	1.64922	Dengue	QC	NaN	NaN	NaN	17.2098	0.1568
Dengue / QC	_YKEENDDFASFR_	P04196	-0.226186	0.226186	1.38255e-05	2.05914e-05	176	P04196	HRG	Histidine-rich glycoprotein	HRG_HUMAN	1	-14.5108	0.854892	Dengue	QC	NaN	NaN	NaN	74.5918	0.0537953
Dengue / QC	_RLGNGVQC[Carbamidomethyl (C)]LAMGWGLLGR_	P08246	2.26423	2.26423	1.38487e-05	2.06154e-05	26	P08246	ELANE	Neutrophil elastase	ELNE_HUMAN	1	380.397	4.80397	Dengue	QC	NaN	NaN	NaN	14.5367	0.338911
Dengue / QC	_LLGIETPLPK_	P05362	1.32411	1.32411	1.45168e-05	2.15446e-05	28	P05362	ICAM1	Intercellular adhesion molecule 1	ICAM1_HUMAN	1	150.379	2.50379	Dengue	QC	NaN	NaN	NaN	13.5433	0.173822
Dengue / QC	_NSTFSEIFKK_	A0A0B4J1R6;P29401;P29401-2	3.48847	3.48847	1.48071e-05	2.19423e-05	14	A0A0B4J1R6;P29401;P29401-2	TKT	Transketolase;Transketolase;Isoform 2 of Transketolase	A0A0B4J1R6_HUMAN;TKT_HUMAN;TKT_HUMAN	1	1022.36	11.2236	Dengue	QC	NaN	NaN	NaN	8.02464	0.387094
Dengue / QC	_ITEVWGIPSPIDTVFTR_	Q92954-3	0.923464	0.923464	1.48839e-05	2.20504e-05	66	Q92954-3	PRG4	Isoform C of Proteoglycan 4	PRG4_HUMAN	1	89.6664	1.89666	Dengue	QC	NaN	NaN	NaN	55.1665	0.214338
Dengue / QC	_S[Acetyl (Protein N-term)]DKPDM[Oxidation (M)]AEIEK_	P62328	2.06984	2.06984	1.48896e-05	2.20534e-05	20	P62328	TMSB4X	Thymosin beta-4	TYB4_HUMAN	1	319.839	4.19839	Dengue	QC	NaN	NaN	NaN	13.9967	0.326541
Dengue / QC	_QTLSWTVTPK_	P20742	2.39427	2.39427	1.49095e-05	2.20774e-05	100	P20742	PZP	Pregnancy zone protein	PZP_HUMAN	1	425.71	5.2571	Dengue	QC	NaN	NaN	NaN	49.5666	0.723346
Dengue / QC	_FGQTPVQER_	O95497	0.422214	0.422214	1.50236e-05	2.22351e-05	40	O95497	VNN1	Pantetheinase	VNN1_HUMAN	1	33.9982	1.33998	Dengue	QC	NaN	NaN	NaN	15.3844	0.169227
Dengue / QC	_TYMLAFDVNDEKNWGLSVYADKPETTK_	P02763	0.37508	0.37508	1.53983e-05	2.27268e-05	172	P02763	ORM1	Alpha-1-acid glycoprotein 1	A1AG1_HUMAN	1	29.6912	1.29691	Dengue	QC	NaN	NaN	NaN	130.785	0.0945477
Dengue / QC	_QEPERNEC[Carbamidomethyl (C)]FLQHK_	P02768	-0.302336	0.302336	1.54755e-05	2.28236e-05	176	P02768	ALB	Serum albumin	ALBU_HUMAN	1	-18.9062	0.810938	Dengue	QC	NaN	NaN	NaN	60.9673	0.0882131
Dengue / QC	_QAQC[Carbamidomethyl (C)]GQDFQC[Carbamidomethyl (C)]K_	P07357	0.476208	0.476208	1.55619e-05	2.29394e-05	94	P07357	C8A	Complement component C8 alpha chain	CO8A_HUMAN	1	39.1082	1.39108	Dengue	QC	NaN	NaN	NaN	43.5285	0.105925
Dengue / QC	_IWDVVEK_	P01024	-0.253982	0.253982	1.57345e-05	2.31648e-05	176	P01024	C3	Complement C3	CO3_HUMAN	1	-16.1422	0.838578	Dengue	QC	NaN	NaN	NaN	61.7184	0.0546401
Dengue / QC	_FSGSLLGGK_	P04211	-0.417722	0.417722	1.57442e-05	2.31734e-05	176	P04211	IGLV7-43	Immunoglobulin lambda variable 7-43	LV743_HUMAN	1	-25.1394	0.748606	Dengue	QC	NaN	NaN	NaN	69.1069	0.0879452
Dengue / QC	_GDELADSALEIFK_	Q15582	1.09086	1.09086	1.58509e-05	2.33071e-05	38	Q15582	TGFBI	Transforming growth factor-beta-induced protein ig-h3	BGH3_HUMAN	1	113.001	2.13001	Dengue	QC	NaN	NaN	NaN	13.2191	0.16655
Dengue / QC	_ITFELVYEELLKR_	Q14624	0.407327	0.407327	1.61148e-05	2.36597e-05	122	Q14624	ITIH4	Inter-alpha-trypsin inhibitor heavy chain H4	ITIH4_HUMAN	1	32.6226	1.32623	Dengue	QC	NaN	NaN	NaN	63.7827	0.0980975
Dengue / QC	_HYLMWGLSSDFWGEKPNLSYIIGK_	P01024	0.920987	0.920987	1.62573e-05	2.3857e-05	102	P01024	C3	Complement C3	CO3_HUMAN	1	89.3411	1.89341	Dengue	QC	NaN	NaN	NaN	32.577	0.152093
Dengue / QC	_IVVVTAGVR_	P07195	-0.980389	0.980389	1.64886e-05	2.41724e-05	112	P07195	LDHB	L-lactate dehydrogenase B chain	LDHB_HUMAN	1	-49.3157	0.506843	Dengue	QC	NaN	NaN	NaN	98.5782	0.204629
Dengue / QC	_YAASSYLSLTPEQWKSHR_	P0DOY2	0.642941	0.642941	1.65432e-05	2.42343e-05	160	P0DOY2	IGLC2	Immunoglobulin lambda constant 2	IGLC2_HUMAN	1	56.1509	1.56151	Dengue	QC	NaN	NaN	NaN	119.383	0.137265
Dengue / QC	_LVTDLTK_	P02768	-0.348381	0.348381	1.68599e-05	2.46737e-05	176	P02768	ALB	Serum albumin	ALBU_HUMAN	1	-21.4535	0.785465	Dengue	QC	NaN	NaN	NaN	45.2135	0.0766797
Dengue / QC	_KFIC[Carbamidomethyl (C)]PLTGLWPINTLKC[Carbamidomethyl (C)]TPR_	P02749	4.83689	4.83689	1.69498e-05	2.47929e-05	20	P02749	APOH	Beta-2-glycoprotein 1	APOH_HUMAN	1	2757.91	28.5791	Dengue	QC	NaN	NaN	NaN	10.8995	0.513315
Dengue / QC	_TTPPMLDSDGSFFLYSKLTVDKSR_	P01859	1.51489	1.51489	1.71437e-05	2.50454e-05	36	P01859	IGHG2	Immunoglobulin heavy constant gamma 2	IGHG2_HUMAN	1	185.778	2.85778	Dengue	QC	NaN	NaN	NaN	26.7942	0.366134
Dengue / QC	_ITPGKPYILTVPGHLDEM[Oxidation (M)]QLDIQAR_	P0C0L5	0.838725	0.838725	1.71678e-05	2.50743e-05	150	P0C0L5	C4B	Complement C4-B	CO4B_HUMAN	1	78.8469	1.78847	Dengue	QC	NaN	NaN	NaN	125.533	0.134603
Dengue / QC	_TAGWNIPM[Oxidation (M)]GLLYNKINHC[Carbamidomethyl (C)]RFDEFFSEGC[Carbamidomethyl (C)]APGSK_	P02787	1.85072	1.85072	1.72088e-05	2.51173e-05	136	P02787	TF	Serotransferrin	TRFE_HUMAN	1	260.68	3.6068	Dengue	QC	NaN	NaN	NaN	104.253	0.290299
Dengue / QC	_LKSWFEPLVEDMQR_	P02649	0.290592	0.290592	1.76058e-05	2.56441e-05	124	P02649	APOE	Apolipoprotein E	APOE_HUMAN	1	22.3142	1.22314	Dengue	QC	NaN	NaN	NaN	82.074	0.0951224
Dengue / QC	_TSESGTPSSSTPQENTISGYSLLTC[Carbamidomethyl (C)]K_	H0YAC1;P03952	0.235057	0.235057	1.77852e-05	2.5862e-05	146	H0YAC1;P03952	KLKB1	Plasma kallikrein (Fragment);Plasma kallikrein	H0YAC1_HUMAN;KLKB1_HUMAN	1	17.6953	1.17695	Dengue	QC	NaN	NaN	NaN	108.502	0.0692921
Dengue / QC	_WKC[Carbamidomethyl (C)]DPVDQC[Carbamidomethyl (C)]QDSETGTFYQIGDSWEK_	P02751;P02751-15;P02751-3;P02751-7	0.494098	0.494098	1.79145e-05	2.60421e-05	164	P02751;P02751-15;P02751-3;P02751-7	FN1	Fibronectin;Isoform 15 of Fibronectin;Isoform 3 of Fibronectin;Isoform 7 of Fibronectin	FINC_HUMAN	1	40.844	1.40844	Dengue	QC	NaN	NaN	NaN	122.414	0.0936317
Dengue / QC	_TGESAEFVC[Carbamidomethyl (C)]K_	Q03591	0.604964	0.604964	1.7939e-05	2.60649e-05	136	Q03591	CFHR1	Complement factor H-related protein 1	FHR1_HUMAN	1	52.0941	1.52094	Dengue	QC	NaN	NaN	NaN	93.9735	0.123379
Dengue / QC	_QN[Hex]C[Carbamidomethyl (C)]ELFEQLGEYK_	P02768	2.85029	2.85029	1.79485e-05	2.60722e-05	120	P02768	ALB	Serum albumin	ALBU_HUMAN	1	621.143	7.21143	Dengue	QC	NaN	NaN	NaN	77.2721	0.326748
Dengue / QC	_EDPQTFYYAVAVVKK_	P02787	-0.246541	0.246541	1.79919e-05	2.61225e-05	176	P02787	TF	Serotransferrin	TRFE_HUMAN	1	-15.7085	0.842915	Dengue	QC	NaN	NaN	NaN	89.201	0.0541131
Dengue / QC	_NGIDIYSLTVDSR_	Q14624	0.638395	0.638395	1.8145e-05	2.63188e-05	78	Q14624	ITIH4	Inter-alpha-trypsin inhibitor heavy chain H4	ITIH4_HUMAN	1	55.6596	1.5566	Dengue	QC	NaN	NaN	NaN	44.3665	0.117612
Dengue / QC	_SSQSLLHSDGK_	A0A075B6S2;A2NJV5	0.877026	0.877026	1.8297e-05	2.64936e-05	76	A0A075B6S2;A2NJV5	IGKV2D-29;IGKV2-29	Immunoglobulin kappa variable 2D-29;Immunoglobulin kappa variable 2-29	KVD29_HUMAN;KV229_HUMAN	1	83.6586	1.83659	Dengue	QC	NaN	NaN	NaN	65.1667	0.173853
Dengue / QC	_RNPFVFAPTLLTVAVHFEEVAK_	P43652	0.839512	0.839512	1.8677e-05	2.70105e-05	120	P43652	AFM	Afamin	AFAM_HUMAN	1	78.9445	1.78944	Dengue	QC	NaN	NaN	NaN	47.6091	0.161116
Dengue / QC	_GETFSC[Carbamidomethyl (C)]MVGHEALPLAFTQK_	A0A286YEY5;P01877	-0.213691	0.213691	1.87007e-05	2.70382e-05	150	A0A286YEY5;P01877	IGHA2	Immunoglobulin heavy constant alpha 2 (Fragment);Immunoglobulin heavy constant alpha 2	A0A286YEY5_HUMAN;IGHA2_HUMAN	1	-13.7672	0.862328	Dengue	QC	NaN	NaN	NaN	67.6044	0.305581
Dengue / QC	_ISGLIYEETR_	P62805	1.94582	1.94582	1.88495e-05	2.72332e-05	30	P62805	HIST1H4A	Histone H4	H4_HUMAN	1	285.256	3.85256	Dengue	QC	NaN	NaN	NaN	15.5337	0.347412
Dengue / QC	_SSPVVIDASTAIDAPSNLR_	P02751;P02751-15;P02751-3;P02751-7	0.228509	0.228509	1.88786e-05	2.72619e-05	176	P02751;P02751-15;P02751-3;P02751-7	FN1	Fibronectin;Isoform 15 of Fibronectin;Isoform 3 of Fibronectin;Isoform 7 of Fibronectin	FINC_HUMAN	1	17.1623	1.17162	Dengue	QC	NaN	NaN	NaN	141.585	0.0721448
Dengue / QC	_SYSC[Carbamidomethyl (C)]QVTHEGSTVEKTVAPTEC[Carbamidomethyl (C)]S_	P0DOY2	1.55508	1.55508	1.88905e-05	2.72724e-05	166	P0DOY2	IGLC2	Immunoglobulin lambda constant 2	IGLC2_HUMAN	1	193.85	2.9385	Dengue	QC	NaN	NaN	NaN	150.806	0.296097
Dengue / QC	_C[Carbamidomethyl (C)]KSSNLIILEEHLK_	P08603	1.01057	1.01057	1.89614e-05	2.73681e-05	118	P08603	CFH	Complement factor H	CFAH_HUMAN	1	101.47	2.0147	Dengue	QC	NaN	NaN	NaN	107.832	0.184266
Dengue / QC	_DYFMPC[Carbamidomethyl (C)]PGRGHGHR_	P02790	1.23024	1.23024	1.91332e-05	2.76025e-05	80	P02790	HPX	Hemopexin	HEMO_HUMAN	1	134.605	2.34605	Dengue	QC	NaN	NaN	NaN	54.7503	0.222004
Dengue / QC	_MESLGITSR_	P07357	-0.252767	0.252767	1.93189e-05	2.78413e-05	176	P07357	C8A	Complement component C8 alpha chain	CO8A_HUMAN	1	-16.0715	0.839285	Dengue	QC	NaN	NaN	NaN	67.2593	0.058006
Dengue / QC	_FFSASC[Carbamidomethyl (C)]VPGADKGQFPNLC[Carbamidomethyl (C)]R_	E7ER44;P02788	1.3329	1.3329	1.93224e-05	2.78413e-05	42	E7ER44;P02788	LTF	Lactotransferrin	E7ER44_HUMAN;TRFL_HUMAN	1	151.908	2.51908	Dengue	QC	NaN	NaN	NaN	25.5069	0.241577
Dengue / QC	_QPSSAFAAFVK_	P01024	-0.362412	0.362412	1.94404e-05	2.79976e-05	164	P01024	C3	Complement C3	CO3_HUMAN	1	-22.2137	0.777863	Dengue	QC	NaN	NaN	NaN	101.66	0.0706114
Dengue / QC	_TLNQPDSQLQLTTGNGLFLSEGLK_	P01009	0.373877	0.373877	2.00522e-05	2.88293e-05	144	P01009	SERPINA1	Alpha-1-antitrypsin	A1AT_HUMAN	1	29.5831	1.29583	Dengue	QC	NaN	NaN	NaN	139.631	0.0982625
Dengue / QC	_GFLLWYSGR_	Q15113	0.816562	0.816562	2.0461e-05	2.93812e-05	44	Q15113	PCOLCE	Procollagen C-endopeptidase enhancer 1	PCOC1_HUMAN	1	76.1204	1.7612	Dengue	QC	NaN	NaN	NaN	32.6571	0.193531
Dengue / QC	_GVYSSDVFDIFPGTYQTLEM[Oxidation (M)]FPR_	P00450	0.35285	0.35285	2.09472e-05	3.00061e-05	172	P00450	CP	Ceruloplasmin	CERU_HUMAN	1	27.7081	1.27708	Dengue	QC	NaN	NaN	NaN	133.547	0.0691925
Dengue / QC	_WYQMGIVSWGEGC[Carbamidomethyl (C)]DR_	P00734	0.403094	0.403094	2.1223e-05	3.03643e-05	120	P00734	F2	Prothrombin	THRB_HUMAN	1	32.234	1.32234	Dengue	QC	NaN	NaN	NaN	57.0651	0.104499
Dengue / QC	_MRPWKDPPSDLLLLK_	A0A0A0MRJ7;P12259	0.691393	0.691393	2.12298e-05	3.03666e-05	30	A0A0A0MRJ7;P12259	F5	Coagulation factor V	A0A0A0MRJ7_HUMAN;FA5_HUMAN	1	61.4842	1.61484	Dengue	QC	NaN	NaN	NaN	22.8698	0.14105
Dengue / QC	_SC[Carbamidomethyl (C)]HLAMAPNHAVVSR_	E7ER44;P02788	1.72411	1.72411	2.12558e-05	3.03964e-05	22	E7ER44;P02788	LTF	Lactotransferrin	E7ER44_HUMAN;TRFL_HUMAN	1	230.375	3.30375	Dengue	QC	NaN	NaN	NaN	16.9443	0.325101
Dengue / QC	_AKM[Oxidation (M)]GNFPWQVFTNIHGR_	B4DPQ0	-0.67218	0.67218	2.129e-05	3.04305e-05	26	B4DPQ0	C1R	Complement C1r subcomponent	B4DPQ0_HUMAN	1	-37.2442	0.627558	Dengue	QC	NaN	NaN	NaN	11.0086	0.691615
Dengue / QC	_DKATFGC[Carbamidomethyl (C)]HDGYSLDGPEEIEC[Carbamidomethyl (C)]TK_	P02749	0.359099	0.359099	2.13648e-05	3.05078e-05	176	P02749	APOH	Beta-2-glycoprotein 1	APOH_HUMAN	1	28.2624	1.28262	Dengue	QC	NaN	NaN	NaN	103.594	0.0737436
Dengue / QC	_AQAWGER_	P02649	0.53247	0.53247	2.1432e-05	3.05889e-05	126	P02649	APOE	Apolipoprotein E	APOE_HUMAN	1	44.6403	1.4464	Dengue	QC	NaN	NaN	NaN	94.5462	0.107604
Dengue / QC	_SLAPYAQDTQEK_	P06727	0.436567	0.436567	2.15048e-05	3.06853e-05	110	P06727	APOA4	Apolipoprotein A-IV	APOA4_HUMAN	1	35.338	1.35338	Dengue	QC	NaN	NaN	NaN	103.351	0.096669
Dengue / QC	_LKC[Carbamidomethyl (C)]LAYDFYPGKIDVHWTR_	P25311	2.89064	2.89064	2.15947e-05	3.0784e-05	66	P25311	AZGP1	Zinc-alpha-2-glycoprotein	ZA2G_HUMAN	1	641.6	7.416	Dengue	QC	NaN	NaN	NaN	48.6437	0.454103
Dengue / QC	_LC[Carbamidomethyl (C)]NSPSPQMNGKPC[Carbamidomethyl (C)]EGEAR_	P07996	0.770121	0.770121	2.15948e-05	3.0784e-05	44	P07996	THBS1	Thrombospondin-1	TSP1_HUMAN	1	70.5413	1.70541	Dengue	QC	NaN	NaN	NaN	16.8035	0.120781
Dengue / QC	_AGVETTTPSKQSNNKYAASSYLSLTPEQWK_	P0DOY2	1.16989	1.16989	2.18959e-05	3.11678e-05	160	P0DOY2	IGLC2	Immunoglobulin lambda constant 2	IGLC2_HUMAN	1	124.995	2.24995	Dengue	QC	NaN	NaN	NaN	145.204	0.267348
Dengue / QC	_EVTVPVFYPTEK_	P43121	0.483598	0.483598	2.21213e-05	3.14812e-05	52	P43121	MCAM	Cell surface glycoprotein MUC18	MUC18_HUMAN	1	39.8226	1.39823	Dengue	QC	NaN	NaN	NaN	34.5298	0.127879
Dengue / QC	_QPSSAFAAFVKR_	P01024	-0.453035	0.453035	2.2162e-05	3.15248e-05	174	P01024	C3	Complement C3	CO3_HUMAN	1	-26.9496	0.730504	Dengue	QC	NaN	NaN	NaN	58.152	0.101574
Dengue / QC	_TLDHDRC[Carbamidomethyl (C)]DQHTDC[Carbamidomethyl (C)]YSC[Carbamidomethyl (C)]TANTNDC[Carbamidomethyl (C)]HWC[Carbamidomethyl (C)]NDHC[Carbamidomethyl (C)]VPR_	O75882;O75882-2;O75882-3	0.855401	0.855401	2.22476e-05	3.1638e-05	36	O75882;O75882-2;O75882-3	ATRN	Attractin;Isoform 2 of Attractin;Isoform 3 of Attractin	ATRN_HUMAN	1	80.9262	1.80926	Dengue	QC	NaN	NaN	NaN	12.7293	0.14985
Dengue / QC	_AEPLAFTFSHDYKGSTSHHLVSR_	P04114	0.485131	0.485131	2.23759e-05	3.17973e-05	86	P04114	APOB	Apolipoprotein B-100	APOB_HUMAN	1	39.9713	1.39971	Dengue	QC	NaN	NaN	NaN	77.4721	0.1062
Dengue / QC	_WLQGSQELPREK_	A0A0G2JMB2	-0.53166	0.53166	2.25281e-05	3.2006e-05	176	A0A0G2JMB2	IGHA2	Immunoglobulin heavy constant alpha 2 (Fragment)	A0A0G2JMB2_HUMAN	1	-30.8242	0.691758	Dengue	QC	NaN	NaN	NaN	75.289	0.114991
Dengue / QC	_NNQKSEPLIGR_	P02751;P02751-15;P02751-3;P02751-7	0.697731	0.697731	2.25695e-05	3.20414e-05	60	P02751;P02751-15;P02751-3;P02751-7	FN1	Fibronectin;Isoform 15 of Fibronectin;Isoform 3 of Fibronectin;Isoform 7 of Fibronectin	FINC_HUMAN	1	62.1952	1.62195	Dengue	QC	NaN	NaN	NaN	41.5025	0.213269
Dengue / QC	_EFNPLVIVGLSK_	A0A0A0MRJ7;P12259	0.641811	0.641811	2.25783e-05	3.20463e-05	96	A0A0A0MRJ7;P12259	F5	Coagulation factor V	A0A0A0MRJ7_HUMAN;FA5_HUMAN	1	56.0286	1.56029	Dengue	QC	NaN	NaN	NaN	34.9028	0.188988
Dengue / QC	_QTVEAMK_	P19823	1.15843	1.15843	2.33914e-05	3.30886e-05	22	P19823	ITIH2	Inter-alpha-trypsin inhibitor heavy chain H2	ITIH2_HUMAN	1	123.214	2.23214	Dengue	QC	NaN	NaN	NaN	11.7208	0.181043
Dengue / QC	_TPDFC[Carbamidomethyl (C)]AMSC[Carbamidomethyl (C)]PPSLVYNHC[Carbamidomethyl (C)]EHGC[Carbamidomethyl (C)]PR_	P04275	0.746916	0.746916	2.35383e-05	3.32725e-05	90	P04275	VWF	von Willebrand factor	VWF_HUMAN	1	67.8202	1.6782	Dengue	QC	NaN	NaN	NaN	60.0719	0.15801
Dengue / QC	_TSALSAK_	P02774;P02774-3	0.691372	0.691372	2.38208e-05	3.36234e-05	98	P02774;P02774-3	GC	Vitamin D-binding protein;Isoform 3 of Vitamin D-binding protein	VTDB_HUMAN	1	61.4818	1.61482	Dengue	QC	NaN	NaN	NaN	87.0424	0.242538
Dengue / QC	_NNNEKDM[Oxidation (M)]ALTAFVLISLQEAKDIC[Carbamidomethyl (C)]EEQVNSLPGSITK_	P01024	1.10909	1.10909	2.40401e-05	3.38855e-05	102	P01024	C3	Complement C3	CO3_HUMAN	1	115.709	2.15709	Dengue	QC	NaN	NaN	NaN	63.1263	0.161728
Dengue / QC	_IGFPWSEIR_	P26038	1.87253	1.87253	2.40411e-05	3.38855e-05	18	P26038	MSN	Moesin	MOES_HUMAN	1	266.175	3.66175	Dengue	QC	NaN	NaN	NaN	12.5287	0.348412
Dengue / QC	_SLIYAASSLQSGVPSK_	P04430	-0.573341	0.573341	2.41126e-05	3.397e-05	166	P04430	IGKV1-16	Immunoglobulin kappa variable 1-16	KV116_HUMAN	1	-32.7942	0.672058	Dengue	QC	NaN	NaN	NaN	52.9551	0.129179
Dengue / QC	_SLWNGDTGEC[Carbamidomethyl (C)]TDNAYIDIQLR_	P01042	0.902041	0.902041	2.43152e-05	3.42281e-05	130	P01042	KNG1	Kininogen-1	KNG1_HUMAN	1	86.8708	1.86871	Dengue	QC	NaN	NaN	NaN	22.7988	0.143808
Dengue / QC	_VNEPSILEMSR_	O14791;O14791-2	-0.260065	0.260065	2.4559e-05	3.4508e-05	176	O14791;O14791-2	APOL1	Apolipoprotein L1;Isoform 2 of Apolipoprotein L1	APOL1_HUMAN	1	-16.495	0.83505	Dengue	QC	NaN	NaN	NaN	98.3356	0.0573513
Dengue / QC	_NDLGWYQQK_	A0A0C4DH72	0.147844	0.147844	2.46828e-05	3.46572e-05	102	A0A0C4DH72	IGKV1-6	Immunoglobulin kappa variable 1-6	KV106_HUMAN	1	10.7913	1.10791	Dengue	QC	NaN	NaN	NaN	57.9514	0.169607
Dengue / QC	_YLYEIARR_	P02768	-0.329426	0.329426	2.46963e-05	3.46679e-05	176	P02768	ALB	Serum albumin	ALBU_HUMAN	1	-20.4147	0.795853	Dengue	QC	NaN	NaN	NaN	46.3599	0.0756732
Dengue / QC	_PYSIHAHGVQTESSTVTPTLPGETLTYVWK_	P00450	0.962209	0.962209	2.47932e-05	3.47956e-05	24	P00450	CP	Ceruloplasmin	CERU_HUMAN	1	94.8291	1.94829	Dengue	QC	NaN	NaN	NaN	16.9553	0.165954
Dengue / QC	_KVADALTNAVAHVDDMPNALSALSDLHAHK_	P69905	0.484955	0.484955	2.49046e-05	3.49436e-05	106	P69905	HBA1	Hemoglobin subunit alpha	HBA_HUMAN	1	39.9542	1.39954	Dengue	QC	NaN	NaN	NaN	77.1089	0.0690148
Dengue / QC	_TFVNITPAEVGVLVGK_	P07737	1.34969	1.34969	2.62279e-05	3.6678e-05	36	P07737	PFN1	Profilin-1	PROF1_HUMAN	1	154.857	2.54857	Dengue	QC	NaN	NaN	NaN	10.8281	0.273342
Dengue / QC	_TFTC[Carbamidomethyl (C)]TAAYPESKTPLTATLSK_	P01876	1.98349	1.98349	2.63066e-05	3.67617e-05	156	P01876	IGHA1	Immunoglobulin heavy constant alpha 1	IGHA1_HUMAN	1	295.448	3.95448	Dengue	QC	NaN	NaN	NaN	133.946	0.397549
Dengue / QC	_TVAAPSVFIFPPSDEQLK_	P01834	-0.509861	0.509861	2.6431e-05	3.69181e-05	176	P01834	IGKC	Immunoglobulin kappa constant	IGKC_HUMAN	1	-29.771	0.70229	Dengue	QC	NaN	NaN	NaN	65.0908	0.101555
Dengue / QC	_TDC[Carbamidomethyl (C)]LSLPSFENAIPMGEKKDVYK_	P08603	0.398663	0.398663	2.68889e-05	3.75132e-05	144	P08603	CFH	Complement factor H	CFAH_HUMAN	1	31.8285	1.31829	Dengue	QC	NaN	NaN	NaN	105.905	0.0841459
Dengue / QC	_VTMSVDTSKNQFSLK_	A0A0C4DH34	-0.44845	0.44845	2.71875e-05	3.78849e-05	170	A0A0C4DH34	IGHV4-28	Immunoglobulin heavy variable 4-28	HV428_HUMAN	1	-26.717	0.73283	Dengue	QC	NaN	NaN	NaN	43.8213	0.121024
Dengue / QC	_DSLEFREIGELYLPK_	P01011	0.942999	0.942999	2.72184e-05	3.79098e-05	44	P01011	SERPINA3	Alpha-1-antichymotrypsin	AACT_HUMAN	1	92.2521	1.92252	Dengue	QC	NaN	NaN	NaN	23.6122	0.156232
Dengue / QC	_GADVWFK_	P05109	1.8031	1.8031	2.73703e-05	3.81035e-05	38	P05109	S100A8	Protein S100-A8	S10A8_HUMAN	1	248.969	3.48969	Dengue	QC	NaN	NaN	NaN	16.2848	0.276925
Dengue / QC	_VPQVSTPTLVEVSRNLGK_	P02768	3.04609	3.04609	2.77062e-05	3.85438e-05	78	P02768	ALB	Serum albumin	ALBU_HUMAN	1	725.971	8.25971	Dengue	QC	NaN	NaN	NaN	49.7593	0.641103
Dengue / QC	_VSTLPAITLK_	A0A1B0GV23;A0A1B0GVD5;A0A1B0GWE8;P07339	0.593327	0.593327	2.77511e-05	3.85972e-05	44	A0A1B0GV23;A0A1B0GVD5;A0A1B0GWE8;P07339	CTSD	Cathepsin D	A0A1B0GV23_HUMAN;A0A1B0GVD5_HUMAN;A0A1B0GWE8_HUMAN;CATD_HUMAN	1	50.8722	1.50872	Dengue	QC	NaN	NaN	NaN	37.2678	0.150675
Dengue / QC	_C[Carbamidomethyl (C)]QAYESNRESLLNHFLYEVAR_	P43652	0.570362	0.570362	2.79188e-05	3.88121e-05	90	P43652	AFM	Afamin	AFAM_HUMAN	1	48.4896	1.4849	Dengue	QC	NaN	NaN	NaN	43.5255	0.142203
Dengue / QC	_ARPHAWPFMVSLQLR_	P08246	1.81366	1.81366	2.79644e-05	3.88662e-05	52	P08246	ELANE	Neutrophil elastase	ELNE_HUMAN	1	251.533	3.51533	Dengue	QC	NaN	NaN	NaN	29.4593	0.410993
Dengue / QC	_VGFYESDVMGR_	P01023	-0.325819	0.325819	2.81438e-05	3.90879e-05	176	P01023	A2M	Alpha-2-macroglobulin	A2MG_HUMAN	1	-20.2155	0.797845	Dengue	QC	NaN	NaN	NaN	72.9289	0.0785396
Dengue / QC	_LLEPHC[Carbamidomethyl (C)]FPLSLVPTEFC[Carbamidomethyl (C)]PSPPALK_	P10643	0.476806	0.476806	2.84783e-05	3.95059e-05	114	P10643	C7	Complement component C7	CO7_HUMAN	1	39.1659	1.39166	Dengue	QC	NaN	NaN	NaN	76.7698	0.128042
Dengue / QC	_GQWGTVC[Carbamidomethyl (C)]DNLWDLTDASVVC[Carbamidomethyl (C)]R_	Q08380	0.880445	0.880445	2.85253e-05	3.95617e-05	122	Q08380	LGALS3BP	Galectin-3-binding protein	LG3BP_HUMAN	1	84.0943	1.84094	Dengue	QC	NaN	NaN	NaN	88.5316	0.16414
Dengue / QC	_RNHMQYEIVIK_	P19827	0.412816	0.412816	2.85328e-05	3.95627e-05	54	P19827	ITIH1	Inter-alpha-trypsin inhibitor heavy chain H1	ITIH1_HUMAN	1	33.1282	1.33128	Dengue	QC	NaN	NaN	NaN	38.7943	0.13123
Dengue / QC	_AEAEEDGDLQC[Carbamidomethyl (C)]LC[Carbamidomethyl (C)]VK_	P10720	0.576838	0.576838	2.86183e-05	3.9672e-05	58	P10720	PF4V1	Platelet factor 4 variant	PF4V_HUMAN	1	49.1577	1.49158	Dengue	QC	NaN	NaN	NaN	32.0449	0.153628
Dengue / QC	_VASYAAWIDSVLA_	K7ERG9;P00746	0.729337	0.729337	2.9085e-05	4.02526e-05	122	K7ERG9;P00746	CFD	Complement factor D	K7ERG9_HUMAN;CFAD_HUMAN	1	65.7877	1.65788	Dengue	QC	NaN	NaN	NaN	112.361	0.165354
Dengue / QC	_GRTLEIPGNSDPNMIPDGDFNSYVR_	P0C0L5	0.950249	0.950249	2.91338e-05	4.03107e-05	170	P0C0L5	C4B	Complement C4-B	CO4B_HUMAN	1	93.2207	1.93221	Dengue	QC	NaN	NaN	NaN	157.079	0.165205
Dengue / QC	_YIC[Carbamidomethyl (C)]ENQDSISSKLK_	P02768	0.62629	0.62629	2.92544e-05	4.04394e-05	176	P02768	ALB	Serum albumin	ALBU_HUMAN	1	54.3591	1.54359	Dengue	QC	NaN	NaN	NaN	158.975	0.130099
Dengue / QC	_VMDKYTFELSRR_	P02774;P02774-3	0.500809	0.500809	2.95305e-05	4.07828e-05	154	P02774;P02774-3	GC	Vitamin D-binding protein;Isoform 3 of Vitamin D-binding protein	VTDB_HUMAN	1	41.5007	1.41501	Dengue	QC	NaN	NaN	NaN	142.924	0.108536
Dengue / QC	_IYPTVNC[Carbamidomethyl (C)]QPLGMISLMK_	P01042	0.409084	0.409084	2.962e-05	4.08969e-05	170	P01042	KNG1	Kininogen-1	KNG1_HUMAN	1	32.7842	1.32784	Dengue	QC	NaN	NaN	NaN	78.727	0.082857
Dengue / QC	_DVYKAGEQVTYTC[Carbamidomethyl (C)]ATYYK_	P08603	0.653227	0.653227	2.98316e-05	4.11214e-05	62	P08603	CFH	Complement factor H	CFAH_HUMAN	1	57.2682	1.57268	Dengue	QC	NaN	NaN	NaN	30.3584	0.146408
Dengue / QC	_EGDDDRTVC[Carbamidomethyl (C)]R_	P10909;P10909-2;P10909-4;P10909-5	0.63038	0.63038	2.99583e-05	4.12768e-05	150	P10909;P10909-2;P10909-4;P10909-5	CLU	Clusterin;Isoform 2 of Clusterin;Isoform 4 of Clusterin;Isoform 5 of Clusterin	CLUS_HUMAN	1	54.7973	1.54797	Dengue	QC	NaN	NaN	NaN	72.3683	0.0998334
Dengue / QC	_GIETGSEDLEILPNGLAFISSGLKYPGIK_	P27169	0.647722	0.647722	3.00642e-05	4.14034e-05	158	P27169	PON1	Serum paraoxonase/arylesterase 1	PON1_HUMAN	1	56.6693	1.56669	Dengue	QC	NaN	NaN	NaN	97.9858	0.126362
Dengue / QC	_AAC[Carbamidomethyl (C)]LLPKLDELRDEGK_	P02768	2.08279	2.08279	3.01481e-05	4.15092e-05	148	P02768	ALB	Serum albumin	ALBU_HUMAN	1	323.625	4.23625	Dengue	QC	NaN	NaN	NaN	106.434	0.281688
Dengue / QC	_TLNQPDSQLQLTTGNGLFLSEGLKLVDKFLEDVK_	P01009	0.828741	0.828741	3.0645e-05	4.21736e-05	66	P01009	SERPINA1	Alpha-1-antitrypsin	A1AT_HUMAN	1	77.6135	1.77613	Dengue	QC	NaN	NaN	NaN	14.3675	0.122366
Dengue / QC	_QIGSVYR_	P04196	-0.478148	0.478148	3.08707e-05	4.24544e-05	118	P04196	HRG	Histidine-rich glycoprotein	HRG_HUMAN	1	-28.2102	0.717898	Dengue	QC	NaN	NaN	NaN	64.5812	0.0975338
Dengue / QC	_ASPAFLASQNTK_	P20742	2.27237	2.27237	3.08957e-05	4.24789e-05	120	P20742	PZP	Pregnancy zone protein	PZP_HUMAN	1	383.115	4.83115	Dengue	QC	NaN	NaN	NaN	80.1211	0.543026
Dengue / QC	_NIETIINTFHQYSVK_	P06702	2.01302	2.01302	3.11064e-05	4.27386e-05	52	P06702	S100A9	Protein S100-A9	S10A9_HUMAN	1	303.625	4.03625	Dengue	QC	NaN	NaN	NaN	31.5714	0.291139
Dengue / QC	_VRVELLHNPAFC[Carbamidomethyl (C)]SLATTKR_	P01024	0.527182	0.527182	3.12727e-05	4.2947e-05	160	P01024	C3	Complement C3	CO3_HUMAN	1	44.1111	1.44111	Dengue	QC	NaN	NaN	NaN	146.329	0.101598
Dengue / QC	_VKLIANTLC[Carbamidomethyl (C)]NSR_	Q14520;Q14520-2	0.339634	0.339634	3.13751e-05	4.30776e-05	116	Q14520;Q14520-2	HABP2	Hyaluronan-binding protein 2;Isoform 2 of Hyaluronan-binding protein 2	HABP2_HUMAN	1	26.5435	1.26544	Dengue	QC	NaN	NaN	NaN	58.8617	0.10343
Dengue / QC	_MHSM[Oxidation (M)]NGFMYGNQPGLTMC[Carbamidomethyl (C)]K_	P00450	0.339932	0.339932	3.14089e-05	4.3114e-05	26	P00450	CP	Ceruloplasmin	CERU_HUMAN	1	26.5697	1.2657	Dengue	QC	NaN	NaN	NaN	19.4632	0.160685
Dengue / QC	_KLYDYC[Carbamidomethyl (C)]DVPQC[Carbamidomethyl (C)]AAPSFDC[Carbamidomethyl (C)]GKPQVEPK_	P00747	0.364843	0.364843	3.14727e-05	4.31915e-05	176	P00747	PLG	Plasminogen	PLMN_HUMAN	1	28.7742	1.28774	Dengue	QC	NaN	NaN	NaN	141.268	0.073377
Dengue / QC	_FQLFGSPSGQK_	E7ER44;P02788	1.22059	1.22059	3.15996e-05	4.33555e-05	44	E7ER44;P02788	LTF	Lactotransferrin	E7ER44_HUMAN;TRFL_HUMAN	1	133.042	2.33042	Dengue	QC	NaN	NaN	NaN	33.4084	0.282568
Dengue / QC	_TIVRFNRPFLMIIVPTDTQNIFFM[Oxidation (M)]SK_	P01011	1.10718	1.10718	3.16321e-05	4.339e-05	102	P01011	SERPINA3	Alpha-1-antichymotrypsin	AACT_HUMAN	1	115.424	2.15424	Dengue	QC	NaN	NaN	NaN	79.9885	0.238745
Dengue / QC	_SDTSLTWNSVK_	E7ER44;P02788	1.28944	1.28944	3.16847e-05	4.34521e-05	50	E7ER44;P02788	LTF	Lactotransferrin	E7ER44_HUMAN;TRFL_HUMAN	1	144.433	2.44433	Dengue	QC	NaN	NaN	NaN	27.8453	0.272235
Dengue / QC	_NPDAVAAPYC[Carbamidomethyl (C)]YTRDPGVR_	P08519	2.38211	2.38211	3.17792e-05	4.35715e-05	18	P08519	LPA	Apolipoprotein(a)	APOA_HUMAN	1	421.298	5.21298	Dengue	QC	NaN	NaN	NaN	10.2444	0.306066
Dengue / QC	_VAEGTQVLELPFKGDDITM[Oxidation (M)]VLILPKPEK_	P01008	0.368091	0.368091	3.20905e-05	4.39471e-05	162	P01008	SERPINC1	Antithrombin-III	ANT3_HUMAN	1	29.0644	1.29064	Dengue	QC	NaN	NaN	NaN	104.191	0.203846
Dengue / QC	_DKSKEFQLFSSPHGK_	P02787	-0.372831	0.372831	3.23526e-05	4.42648e-05	162	P02787	TF	Serotransferrin	TRFE_HUMAN	1	-22.7734	0.772266	Dengue	QC	NaN	NaN	NaN	60.9297	0.106373
Dengue / QC	_LRYTTEIIK_	B4DPQ0	1.10577	1.10577	3.26881e-05	4.47135e-05	30	B4DPQ0	C1R	Complement C1r subcomponent	B4DPQ0_HUMAN	1	115.213	2.15213	Dengue	QC	NaN	NaN	NaN	11.8346	0.248511
Dengue / QC	_EEQFNSTYR_	P01861	1.24283	1.24283	3.29615e-05	4.50455e-05	22	P01861	IGHG4	Immunoglobulin heavy constant gamma 4	IGHG4_HUMAN	1	136.662	2.36662	Dengue	QC	NaN	NaN	NaN	14.7198	0.249623
Dengue / QC	_AIHLDLEEYR_	Q96KN2	0.378722	0.378722	3.29978e-05	4.50848e-05	88	Q96KN2	CNDP1	Beta-Ala-His dipeptidase	CNDP1_HUMAN	1	30.019	1.30019	Dengue	QC	NaN	NaN	NaN	82.5194	0.102164
Dengue / QC	_NGNMAGISDQR_	P05546	0.371788	0.371788	3.33859e-05	4.55726e-05	100	P05546	SERPIND1	Heparin cofactor 2	HEP2_HUMAN	1	29.3955	1.29396	Dengue	QC	NaN	NaN	NaN	86.9329	0.0802786
Dengue / QC	_LAAYLMLMR_	P04114	0.372217	0.372217	3.34665e-05	4.5651e-05	148	P04114	APOB	Apolipoprotein B-100	APOB_HUMAN	1	29.434	1.29434	Dengue	QC	NaN	NaN	NaN	111.637	0.100326
Dengue / QC	_SNSSMHITDC[Carbamidomethyl (C)]R_	P07998	1.95425	1.95425	3.35832e-05	4.57889e-05	16	P07998	RNASE1	Ribonuclease pancreatic	RNAS1_HUMAN	1	287.514	3.87514	Dengue	QC	NaN	NaN	NaN	11.1144	0.354135
Dengue / QC	_LSC[Carbamidomethyl (C)]AASGFTFDDYGMSWVR_	A0A0C4DH32	0.666226	0.666226	3.39664e-05	4.62899e-05	40	A0A0C4DH32	IGHV3-20	Immunoglobulin heavy variable 3-20	HV320_HUMAN	1	58.6917	1.58692	Dengue	QC	NaN	NaN	NaN	21.3851	0.166445
Dengue / QC	_TFPEIQR_	A0A0A0MS09;P01880;P01880-2	0.585485	0.585485	3.39965e-05	4.63095e-05	82	A0A0A0MS09;P01880;P01880-2	IGHD	Immunoglobulin heavy constant delta (Fragment);Immunoglobulin heavy constant delta;Isoform 2 of Immunoglobulin heavy constant delta	A0A0A0MS09_HUMAN;IGHD_HUMAN;IGHD_HUMAN	1	50.0544	1.50054	Dengue	QC	NaN	NaN	NaN	73.7893	0.153586
Dengue / QC	_VNIPLVTNEEC[Carbamidomethyl (C)]QKR_	H0YAC1;P03952	0.34517	0.34517	3.39918e-05	4.63095e-05	128	H0YAC1;P03952	KLKB1	Plasma kallikrein (Fragment);Plasma kallikrein	H0YAC1_HUMAN;KLKB1_HUMAN	1	27.0301	1.2703	Dengue	QC	NaN	NaN	NaN	76.0829	0.0734441
Dengue / QC	_LGQYASPTAKR_	P0C0L5	0.987472	0.987472	3.40642e-05	4.63802e-05	172	P0C0L5	C4B	Complement C4-B	CO4B_HUMAN	1	98.2708	1.98271	Dengue	QC	NaN	NaN	NaN	142.969	0.170475
Dengue / QC	_VIQTAFQR_	P11597;P11597-2	0.620751	0.620751	3.40924e-05	4.64079e-05	42	P11597;P11597-2	CETP	Cholesteryl ester transfer protein;Isoform 2 of Cholesteryl ester transfer protein	CETP_HUMAN	1	53.7675	1.53768	Dengue	QC	NaN	NaN	NaN	30.8087	0.121401
Dengue / QC	_VDFTLSSERDFALLSLQVPLKDAK_	P0C0L5	0.549854	0.549854	3.41281e-05	4.64457e-05	176	P0C0L5	C4B	Complement C4-B	CO4B_HUMAN	1	46.3938	1.46394	Dengue	QC	NaN	NaN	NaN	108.362	0.105891
Dengue / QC	_DTVIKPLLVEPEGLEK_	P01023	-0.413194	0.413194	3.45111e-05	4.69127e-05	176	P01023	A2M	Alpha-2-macroglobulin	A2MG_HUMAN	1	-24.9041	0.750959	Dengue	QC	NaN	NaN	NaN	75.9016	0.0837281
Dengue / QC	_MQKEITALAPSTMK_	P60709	1.62689	1.62689	3.46753e-05	4.71143e-05	64	P60709	ACTB	Actin, cytoplasmic 1	ACTB_HUMAN	1	208.846	3.08846	Dengue	QC	NaN	NaN	NaN	34.8206	0.311271
Dengue / QC	_TYETTLEKC[Carbamidomethyl (C)]C[Carbamidomethyl (C)]AAADPHEC[Carbamidomethyl (C)]YAK_	P02768	1.35394	1.35394	3.48255e-05	4.73074e-05	176	P02768	ALB	Serum albumin	ALBU_HUMAN	1	155.61	2.5561	Dengue	QC	NaN	NaN	NaN	143.505	0.27858
Dengue / QC	_SPC[Carbamidomethyl (C)]YGYQWVSEEHEEAHHTAYLVFSPSK_	P01023	-0.464768	0.464768	3.52569e-05	4.78234e-05	172	P01023	A2M	Alpha-2-macroglobulin	A2MG_HUMAN	1	-27.5413	0.724587	Dengue	QC	NaN	NaN	NaN	62.579	0.102672
Dengue / QC	_DNSKNTLYLQMNSLRAEDTAVYYC[Carbamidomethyl (C)]AR_	A0A0J9YVT0;P0DP02	1.96611	1.96611	3.52623e-05	4.78234e-05	12	A0A0J9YVT0;P0DP02	IGHV3-33;IGHV3-30-3	Immunoglobulin heavy variable 3-33 (Fragment);Immunoglobulin heavy variable 3-30-3	A0A0J9YVT0_HUMAN;HVC33_HUMAN	1	290.712	3.90712	Dengue	QC	NaN	NaN	NaN	6.51503	0.191566
Dengue / QC	_EC[Carbamidomethyl (C)]SKLPLRITYYHLSFPTNIQAPAVVFR_	P23142-4	1.24848	1.24848	3.54042e-05	4.79828e-05	52	P23142-4	FBLN1	Isoform C of Fibulin-1	FBLN1_HUMAN	1	137.591	2.37591	Dengue	QC	NaN	NaN	NaN	46.6783	0.241334
Dengue / QC	_AHFSPSNIILDFPAAGSAAR_	O00391	0.504206	0.504206	3.54172e-05	4.79894e-05	52	O00391	QSOX1	Sulfhydryl oxidase 1	QSOX1_HUMAN	1	41.8343	1.41834	Dengue	QC	NaN	NaN	NaN	43.1936	0.129132
Dengue / QC	_KIQALQQQADEAEDRAQGLQR_	P67936	0.978753	0.978753	3.54388e-05	4.80075e-05	26	P67936	TPM4	Tropomyosin alpha-4 chain	TPM4_HUMAN	1	97.0762	1.97076	Dengue	QC	NaN	NaN	NaN	20.7827	0.186945
Dengue / QC	_SHRSYSC[Carbamidomethyl (C)]QVTHEGSTVEK_	P0DOY2	1.47548	1.47548	3.55082e-05	4.80795e-05	108	P0DOY2	IGLC2	Immunoglobulin lambda constant 2	IGLC2_HUMAN	1	178.076	2.78076	Dengue	QC	NaN	NaN	NaN	84.6215	0.327153
Dengue / QC	_LTGSC[Carbamidomethyl (C)]SYVLFQNK_	P04275	0.579622	0.579622	3.57135e-05	4.83352e-05	54	P04275	VWF	von Willebrand factor	VWF_HUMAN	1	49.4458	1.49446	Dengue	QC	NaN	NaN	NaN	45.9238	0.165445
Dengue / QC	_DFYVDENTTVR_	P29622	0.725025	0.725025	3.61553e-05	4.88545e-05	44	P29622	SERPINA4	Kallistatin	KAIN_HUMAN	1	65.2929	1.65293	Dengue	QC	NaN	NaN	NaN	20.9394	0.110611
Dengue / QC	_GYGFYTK_	B4DPQ0	-0.382611	0.382611	3.65815e-05	4.93624e-05	138	B4DPQ0	C1R	Complement C1r subcomponent	B4DPQ0_HUMAN	1	-23.2952	0.767048	Dengue	QC	NaN	NaN	NaN	38.7384	0.0879679
Dengue / QC	_NKRDTMVEDLVVLVR_	P07358	0.628536	0.628536	3.66744e-05	4.94651e-05	42	P07358	C8B	Complement component C8 beta chain	CO8B_HUMAN	1	54.5995	1.546	Dengue	QC	NaN	NaN	NaN	26.1531	0.198768
Dengue / QC	_ALGISPFHEHAEVVFTANDSGPRR_	P02766	0.367552	0.367552	3.76005e-05	5.0633e-05	172	P02766	TTR	Transthyretin	TTHY_HUMAN	1	29.0161	1.29016	Dengue	QC	NaN	NaN	NaN	99.4208	0.0749454
Dengue / QC	_SSGLPNIPVQTISR_	G3V0E5;P02786	-0.671196	0.671196	3.83138e-05	5.14756e-05	148	G3V0E5;P02786	TFRC	Transferrin receptor (P90, CD71), isoform CRA_c;Transferrin receptor protein 1	G3V0E5_HUMAN;TFR1_HUMAN	1	-37.2014	0.627986	Dengue	QC	NaN	NaN	NaN	42.9473	0.142496
Dengue / QC	_YNPVVIDFEMQPIHEVLR_	P07357	0.326508	0.326508	3.86374e-05	5.18631e-05	166	P07357	C8A	Complement component C8 alpha chain	CO8A_HUMAN	1	25.3974	1.25397	Dengue	QC	NaN	NaN	NaN	108.549	0.0907992
Dengue / QC	_STDYGIFQINSR_	P61626	-0.445722	0.445722	3.89201e-05	5.22306e-05	168	P61626	LYZ	Lysozyme C	LYSC_HUMAN	1	-26.5783	0.734217	Dengue	QC	NaN	NaN	NaN	103.322	0.0974591
Dengue / QC	_ATAQMLEVMFK_	P18428	0.443829	0.443829	3.92094e-05	5.2595e-05	120	P18428	LBP	Lipopolysaccharide-binding protein	LBP_HUMAN	1	36.021	1.36021	Dengue	QC	NaN	NaN	NaN	102.166	0.105292
Dengue / QC	_GALQNIIPASTGAAK_	P04406	0.899541	0.899541	3.92731e-05	5.26683e-05	34	P04406	GAPDH	Glyceraldehyde-3-phosphate dehydrogenase	G3P_HUMAN	1	86.5473	1.86547	Dengue	QC	NaN	NaN	NaN	19.8556	0.15357
Dengue / QC	_ATVLNYLPK_	P01023	-0.420713	0.420713	3.94843e-05	5.29396e-05	174	P01023	A2M	Alpha-2-macroglobulin	A2MG_HUMAN	1	-25.2945	0.747055	Dengue	QC	NaN	NaN	NaN	106.24	0.0866589
Dengue / QC	_ADLSGITGAR_	P01011	-0.29262	0.29262	3.96537e-05	5.31183e-05	172	P01011	SERPINA3	Alpha-1-antichymotrypsin	AACT_HUMAN	1	-18.3582	0.816418	Dengue	QC	NaN	NaN	NaN	69.0061	0.08154
Dengue / QC	_ATLELSPWQMSALVQVHASQPSSFHDFPDLGQEVALNANTK_	P04114	1.32064	1.32064	3.99326e-05	5.34432e-05	56	P04114	APOB	Apolipoprotein B-100	APOB_HUMAN	1	149.777	2.49777	Dengue	QC	NaN	NaN	NaN	39.8707	0.36031
Dengue / QC	_YEVSVYALK_	P02751;P02751-15;P02751-3;P02751-7	0.450668	0.450668	4.03262e-05	5.39332e-05	116	P02751;P02751-15;P02751-3;P02751-7	FN1	Fibronectin;Isoform 15 of Fibronectin;Isoform 3 of Fibronectin;Isoform 7 of Fibronectin	FINC_HUMAN	1	36.6673	1.36667	Dengue	QC	NaN	NaN	NaN	108.942	0.109844
Dengue / QC	_GEYEEHLGILGPIIR_	A0A0A0MRJ7;P12259	0.331289	0.331289	4.03821e-05	5.39902e-05	140	A0A0A0MRJ7;P12259	F5	Coagulation factor V	A0A0A0MRJ7_HUMAN;FA5_HUMAN	1	25.8137	1.25814	Dengue	QC	NaN	NaN	NaN	96.7829	0.0842228
Dengue / QC	_DLATVYVDVLK_	P02647	0.401119	0.401119	4.04083e-05	5.4002e-05	160	P02647	APOA1	Apolipoprotein A-I	APOA1_HUMAN	1	32.0532	1.32053	Dengue	QC	NaN	NaN	NaN	133.849	0.0903434
Dengue / QC	_KC[Carbamidomethyl (C)]QC[Carbamidomethyl (C)]DELC[Carbamidomethyl (C)]SYYQSC[Carbamidomethyl (C)]C[Carbamidomethyl (C)]TDYTAEC[Carbamidomethyl (C)]KPQVTR_	P04004	0.369336	0.369336	4.04144e-05	5.4002e-05	56	P04004	VTN	Vitronectin	VTNC_HUMAN	1	29.1758	1.29176	Dengue	QC	NaN	NaN	NaN	22.0349	0.0860407
Dengue / QC	_HLSQDTGSPSGMRPWEDLPSQDTGSPSR_	A0A0A0MRJ7;P12259	0.532073	0.532073	4.08082e-05	5.44788e-05	48	A0A0A0MRJ7;P12259	F5	Coagulation factor V	A0A0A0MRJ7_HUMAN;FA5_HUMAN	1	44.6005	1.44601	Dengue	QC	NaN	NaN	NaN	28.8513	0.149774
Dengue / QC	_QAPGKGLEWVGFIR_	A0A0A0MS15	-0.595452	0.595452	4.09432e-05	5.46466e-05	154	A0A0A0MS15	IGHV3-49	Immunoglobulin heavy variable 3-49	HV349_HUMAN	1	-33.8163	0.661837	Dengue	QC	NaN	NaN	NaN	49.9937	0.14051
Dengue / QC	_YIYGKPVQGVAYVR_	P0C0L5	-0.294062	0.294062	4.12923e-05	5.50751e-05	176	P0C0L5	C4B	Complement C4-B	CO4B_HUMAN	1	-18.4397	0.815603	Dengue	QC	NaN	NaN	NaN	104.559	0.0621954
Dengue / QC	_VAAEDWK_	A0A0G2JMB2	-0.37069	0.37069	4.15829e-05	5.54376e-05	176	A0A0G2JMB2	IGHA2	Immunoglobulin heavy constant alpha 2 (Fragment)	A0A0G2JMB2_HUMAN	1	-22.6587	0.773413	Dengue	QC	NaN	NaN	NaN	111.377	0.0875939
Dengue / QC	_DSALSWEYC[Carbamidomethyl (C)]R_	Q04756	0.292749	0.292749	4.21457e-05	5.61243e-05	122	Q04756	HGFAC	Hepatocyte growth factor activator	HGFA_HUMAN	1	22.4972	1.22497	Dengue	QC	NaN	NaN	NaN	59.4916	0.0799781
Dengue / QC	_VQYEC[Carbamidomethyl (C)]ATGYYTAGGKK_	P05160	0.552938	0.552938	4.23797e-05	5.63722e-05	80	P05160	F13B	Coagulation factor XIII B chain	F13B_HUMAN	1	46.707	1.46707	Dengue	QC	NaN	NaN	NaN	36.2915	0.104738
Dengue / QC	_DSDWPFC[Carbamidomethyl (C)]SDEDWNYKC[Carbamidomethyl (C)]PSGC[Carbamidomethyl (C)]R_	P02671	1.51426	1.51426	4.28919e-05	5.69891e-05	42	P02671	FGA	Fibrinogen alpha chain	FIBA_HUMAN	1	185.652	2.85652	Dengue	QC	NaN	NaN	NaN	32.482	0.219599
Dengue / QC	_AVGYLITGYQR_	P20742	2.03074	2.03074	4.36588e-05	5.79165e-05	68	P20742	PZP	Pregnancy zone protein	PZP_HUMAN	1	308.614	4.08614	Dengue	QC	NaN	NaN	NaN	43.2976	0.478476
Dengue / QC	_RSVAVYGQYGGQPC[Carbamidomethyl (C)]VGNAFETQSC[Carbamidomethyl (C)]EPTR_	P10643	0.447764	0.447764	4.37697e-05	5.80113e-05	94	P10643	C7	Complement component C7	CO7_HUMAN	1	36.3925	1.36392	Dengue	QC	NaN	NaN	NaN	88.0197	0.12855
Dengue / QC	_SC[Carbamidomethyl (C)]VNAIPDQC[Carbamidomethyl (C)]SPLPC[Carbamidomethyl (C)]NEDGYMSC[Carbamidomethyl (C)]KDGK_	P07225	0.516654	0.516654	4.38299e-05	5.8065e-05	170	P07225	PROS1	Vitamin K-dependent protein S	PROS_HUMAN	1	43.0633	1.43063	Dengue	QC	NaN	NaN	NaN	153.392	0.104686
Dengue / QC	_DSFHLDEQFTVPVEM[Oxidation (M)]MQAR_	P08697	0.538625	0.538625	4.39702e-05	5.82116e-05	82	P08697	SERPINF2	Alpha-2-antiplasmin	A2AP_HUMAN	1	45.2588	1.45259	Dengue	QC	NaN	NaN	NaN	62.7372	0.100581
Dengue / QC	_MSPW[Hex]SEW[Hex]SQC[Carbamidomethyl (C)]DPC[Carbamidomethyl (C)]LR_	P02748	0.51338	0.51338	4.4277e-05	5.85913e-05	62	P02748	C9	Complement component C9	CO9_HUMAN	1	42.7391	1.42739	Dengue	QC	NaN	NaN	NaN	41.693	0.110174
Dengue / QC	_STSPPKQAEAVLK_	P04114	0.31654	0.31654	4.45499e-05	5.88995e-05	118	P04114	APOB	Apolipoprotein B-100	APOB_HUMAN	1	24.534	1.24534	Dengue	QC	NaN	NaN	NaN	46.7397	0.114161
Dengue / QC	_EHLVQATPENLQEAR_	Q06033;Q06033-2	-0.431296	0.431296	4.46266e-05	5.89745e-05	160	Q06033;Q06033-2	ITIH3	Inter-alpha-trypsin inhibitor heavy chain H3;Isoform 2 of Inter-alpha-trypsin inhibitor heavy chain H3	ITIH3_HUMAN	1	-25.8405	0.741595	Dengue	QC	NaN	NaN	NaN	48.2076	0.117116
Dengue / QC	_LTGRGAEDSLADQAANKWGR_	P0DJI9	1.0239	1.0239	4.50334e-05	5.94719e-05	52	P0DJI9	SAA2	Serum amyloid A-2 protein	SAA2_HUMAN	1	103.341	2.03341	Dengue	QC	NaN	NaN	NaN	44.931	0.407006
Dengue / QC	_NIILEEGKEILVGDVGQTVDDPYATFVK_	P23528	1.80932	1.80932	4.51327e-05	5.95897e-05	20	P23528	CFL1	Cofilin-1	COF1_HUMAN	1	250.476	3.50476	Dengue	QC	NaN	NaN	NaN	11.7232	0.242621
Dengue / QC	_AEPLAFTFSHDYK_	P04114	0.337219	0.337219	4.51898e-05	5.96517e-05	102	P04114	APOB	Apolipoprotein B-100	APOB_HUMAN	1	26.3319	1.26332	Dengue	QC	NaN	NaN	NaN	65.7378	0.0761227
Dengue / QC	_VAQELEEK_	O14791;O14791-2	0.387019	0.387019	4.5586e-05	6.01612e-05	88	O14791;O14791-2	APOL1	Apolipoprotein L1;Isoform 2 of Apolipoprotein L1	APOL1_HUMAN	1	30.7688	1.30769	Dengue	QC	NaN	NaN	NaN	61.4204	0.09932
Dengue / QC	_SDIAPVAR_	P01023	-0.354626	0.354626	4.56048e-05	6.01725e-05	176	P01023	A2M	Alpha-2-macroglobulin	A2MG_HUMAN	1	-21.7927	0.782073	Dengue	QC	NaN	NaN	NaN	115.32	0.0863134
Dengue / QC	_TATSEYQTFFNPR_	P00734	0.891916	0.891916	4.6643e-05	6.14185e-05	174	P00734	F2	Prothrombin	THRB_HUMAN	1	85.5639	1.85564	Dengue	QC	NaN	NaN	NaN	152.936	0.217132
Dengue / QC	_RGHLFLQTDQPIYNPGQR_	P0C0L5	-0.249641	0.249641	4.67583e-05	6.15428e-05	176	P0C0L5	C4B	Complement C4-B	CO4B_HUMAN	1	-15.8895	0.841105	Dengue	QC	NaN	NaN	NaN	64.2177	0.0704763
Dengue / QC	_VSSFLPWIR_	P08311	0.811423	0.811423	4.71506e-05	6.20314e-05	54	P08311	CTSG	Cathepsin G	CATG_HUMAN	1	75.4941	1.75494	Dengue	QC	NaN	NaN	NaN	28.678	0.279078
Dengue / QC	_LQDRGPDVLTATVSGK_	Q14624	-0.406869	0.406869	4.71896e-05	6.20549e-05	174	Q14624	ITIH4	Inter-alpha-trypsin inhibitor heavy chain H4	ITIH4_HUMAN	1	-24.5742	0.754258	Dengue	QC	NaN	NaN	NaN	51.2758	0.0875416
Dengue / QC	_DNIQGITKPAIR_	P62805	1.53858	1.53858	4.73912e-05	6.22922e-05	46	P62805	HIST1H4A	Histone H4	H4_HUMAN	1	190.509	2.90509	Dengue	QC	NaN	NaN	NaN	17.9391	0.450325
Dengue / QC	_IEDGFSLKEQLQDMGLVDLFSPEK_	P01008	0.334497	0.334497	4.77161e-05	6.27053e-05	158	P01008	SERPINC1	Antithrombin-III	ANT3_HUMAN	1	26.0938	1.26094	Dengue	QC	NaN	NaN	NaN	53.8432	0.169114
Dengue / QC	_RMPC[Carbamidomethyl (C)]AEDY[Hex]LS[Hex]VVLNQLC[Carbamidomethyl (C)]VLHEKTPVSDR_	P02768	1.33309	1.33309	4.80173e-05	6.30544e-05	88	P02768	ALB	Serum albumin	ALBU_HUMAN	1	151.942	2.51942	Dengue	QC	NaN	NaN	NaN	33.345	0.188568
Dengue / QC	_QAKEPC[Carbamidomethyl (C)]VESLVSQYFQTVTDYGK_	P02652;V9GYM3	0.892448	0.892448	4.85658e-05	6.36656e-05	62	P02652;V9GYM3	APOA2	Apolipoprotein A-II	APOA2_HUMAN;V9GYM3_HUMAN	1	85.6324	1.85632	Dengue	QC	NaN	NaN	NaN	29.793	0.345836
Dengue / QC	_LDVPVWDVEATLNFLK_	O00391	0.752377	0.752377	4.86823e-05	6.3804e-05	54	O00391	QSOX1	Sulfhydryl oxidase 1	QSOX1_HUMAN	1	68.4566	1.68457	Dengue	QC	NaN	NaN	NaN	9.45545	0.204264
Dengue / QC	_AFVNC[Carbamidomethyl (C)]DENSR_	P01833	0.934462	0.934462	4.89271e-05	6.40963e-05	110	P01833	PIGR	Polymeric immunoglobulin receptor	PIGR_HUMAN	1	91.1178	1.91118	Dengue	QC	NaN	NaN	NaN	87.6282	0.236038
Dengue / QC	_FSGQLNSHGC[Carbamidomethyl (C)]FYQQVK_	P01023	-0.47834	0.47834	4.90529e-05	6.42469e-05	176	P01023	A2M	Alpha-2-macroglobulin	A2MG_HUMAN	1	-28.2197	0.717803	Dengue	QC	NaN	NaN	NaN	58.2897	0.102961
Dengue / QC	_TPVSDRVTK[Hex]C[Carbamidomethyl (C)]C[Carbamidomethyl (C)]TESLVNR_	P02768	0.186041	0.186041	4.93055e-05	6.45634e-05	16	P02768	ALB	Serum albumin	ALBU_HUMAN	1	13.7637	1.13764	Dengue	QC	NaN	NaN	NaN	4.78139	0.646373
Dengue / QC	_YKAAFT[Hex]EC[Carbamidomethyl (C)]C[Carbamidomethyl (C)]QAADK_	P02768	-0.119448	0.119448	4.93259e-05	6.4572e-05	38	P02768	ALB	Serum albumin	ALBU_HUMAN	1	-7.94601	0.92054	Dengue	QC	NaN	NaN	NaN	9.14621	0.229421
Dengue / QC	_LLIYGASSR_	P01619	0.51275	0.51275	4.94957e-05	6.47548e-05	174	P01619	IGKV3-20	Immunoglobulin kappa variable 3-20	KV320_HUMAN	1	42.6767	1.42677	Dengue	QC	NaN	NaN	NaN	51.7877	0.115707
Dengue / QC	_TVVQPSVGAAAGPVVPPC[Carbamidomethyl (C)]PGR_	P02765	0.417455	0.417455	4.97473e-05	6.5055e-05	176	P02765	AHSG	Alpha-2-HS-glycoprotein	FETUA_HUMAN	1	33.5569	1.33557	Dengue	QC	NaN	NaN	NaN	165.25	0.0916418
Dengue / QC	_C[Carbamidomethyl (C)]SGTEASVVAPPPVVLLPDVETPSEEDC[Carbamidomethyl (C)]MFGNGK_	P00747	0.773483	0.773483	4.98267e-05	6.51299e-05	52	P00747	PLG	Plasminogen	PLMN_HUMAN	1	70.9391	1.70939	Dengue	QC	NaN	NaN	NaN	25.9132	0.127328
Dengue / QC	_LLFDGDAHLLMSIPSPFR_	Q9Y6R7	1.36376	1.36376	5.08674e-05	6.6387e-05	20	Q9Y6R7	FCGBP	IgGFc-binding protein	FCGBP_HUMAN	1	157.355	2.57355	Dengue	QC	NaN	NaN	NaN	7.83146	0.418646
Dengue / QC	_SLGPALLLLQK_	P14780	1.09759	1.09759	5.13574e-05	6.69819e-05	88	P14780	MMP9	Matrix metalloproteinase-9	MMP9_HUMAN	1	113.997	2.13997	Dengue	QC	NaN	NaN	NaN	57.3914	0.249277
Dengue / QC	_FLMKGPNK_	P08603	0.919054	0.919054	5.14001e-05	6.7008e-05	64	P08603	CFH	Complement factor H	CFAH_HUMAN	1	89.0875	1.89088	Dengue	QC	NaN	NaN	NaN	52.944	0.188909
Dengue / QC	_MATTM[Oxidation (M)]IQSK_	P19823	0.931103	0.931103	5.15022e-05	6.71263e-05	90	P19823	ITIH2	Inter-alpha-trypsin inhibitor heavy chain H2	ITIH2_HUMAN	1	90.6733	1.90673	Dengue	QC	NaN	NaN	NaN	49.8225	0.267301
Dengue / QC	_LQLKHLSLLTTLSNRVC[Carbamidomethyl (C)]SQYAAYGEK_	P02774;P02774-3	0.306964	0.306964	5.21439e-05	6.78875e-05	172	P02774;P02774-3	GC	Vitamin D-binding protein;Isoform 3 of Vitamin D-binding protein	VTDB_HUMAN	1	23.7102	1.2371	Dengue	QC	NaN	NaN	NaN	77.7054	0.121374
Dengue / QC	_SGTHTLPVESGDMK_	P20742	2.82613	2.82613	5.22986e-05	6.80737e-05	96	P20742	PZP	Pregnancy zone protein	PZP_HUMAN	1	609.167	7.09167	Dengue	QC	NaN	NaN	NaN	66.6826	0.619927
Dengue / QC	_SFYFPMSIDK_	P05160	0.858647	0.858647	5.24447e-05	6.82489e-05	40	P05160	F13B	Coagulation factor XIII B chain	F13B_HUMAN	1	81.3337	1.81334	Dengue	QC	NaN	NaN	NaN	7.1418	0.124703
Dengue / QC	_C[Carbamidomethyl (C)]C[Carbamidomethyl (C)]T[Hex]ESLVNR_	P02768	-0.305457	0.305457	5.26806e-05	6.84953e-05	126	P02768	ALB	Serum albumin	ALBU_HUMAN	1	-19.0814	0.809186	Dengue	QC	NaN	NaN	NaN	39.4471	0.255262
Dengue / QC	_RDPPQYPVVPVHLDR_	P10153	1.23748	1.23748	5.27766e-05	6.86049e-05	34	P10153	RNASE2	Non-secretory ribonuclease	RNAS2_HUMAN	1	135.787	2.35787	Dengue	QC	NaN	NaN	NaN	27.3146	0.276877
Dengue / QC	_KPDVSHGEM[Oxidation (M)]VSGFGPIYNYK_	P04003	1.43583	1.43583	5.31054e-05	6.90019e-05	16	P04003	C4BPA	C4b-binding protein alpha chain	C4BPA_HUMAN	1	170.538	2.70538	Dengue	QC	NaN	NaN	NaN	9.20865	0.1276
Dengue / QC	_VGFAEAARL_	A0A1B0GV23;A0A1B0GVD5;A0A1B0GWE8;P07339	0.733863	0.733863	5.31272e-05	6.9015e-05	34	A0A1B0GV23;A0A1B0GVD5;A0A1B0GWE8;P07339	CTSD	Cathepsin D	A0A1B0GV23_HUMAN;A0A1B0GVD5_HUMAN;A0A1B0GWE8_HUMAN;CATD_HUMAN	1	66.3087	1.66309	Dengue	QC	NaN	NaN	NaN	12.3588	0.206094
Dengue / QC	_TMSGLEC[Carbamidomethyl (C)]QAWDSQSPHAHGYIPSK_	P00747	0.263681	0.263681	5.44918e-05	7.06473e-05	68	P00747	PLG	Plasminogen	PLMN_HUMAN	1	20.0538	1.20054	Dengue	QC	NaN	NaN	NaN	52.1089	0.077976
Dengue / QC	_HPYTGPSC[Carbamidomethyl (C)]SQVVPVC[Carbamidomethyl (C)]RPNPC[Carbamidomethyl (C)]QNGATC[Carbamidomethyl (C)]SR_	Q14520;Q14520-2	0.781955	0.781955	5.47986e-05	7.09875e-05	18	Q14520;Q14520-2	HABP2	Hyaluronan-binding protein 2;Isoform 2 of Hyaluronan-binding protein 2	HABP2_HUMAN	1	71.946	1.71946	Dengue	QC	NaN	NaN	NaN	12.9659	0.187271
Dengue / QC	_QFPFLASIQNQGR_	P20160	1.46697	1.46697	5.48044e-05	7.09875e-05	26	P20160	AZU1	Azurocidin	CAP7_HUMAN	1	176.44	2.7644	Dengue	QC	NaN	NaN	NaN	19.1152	0.29071
Dengue / QC	_ENADSLQASLRPHADELKAK_	P06727	0.461921	0.461921	5.49296e-05	7.11053e-05	62	P06727	APOA4	Apolipoprotein A-IV	APOA4_HUMAN	1	37.7374	1.37737	Dengue	QC	NaN	NaN	NaN	57.1638	0.130019
Dengue / QC	_ASQGISSW[HexN]LAWYQQKPGK_	A0A0C4DH73;P01611	0.784647	0.784647	5.52636e-05	7.14905e-05	60	A0A0C4DH73;P01611	IGKV1-12;IGKV1D-12	Immunoglobulin kappa variable 1-12;Immunoglobulin kappa variable 1D-12	KV112_HUMAN;KVD12_HUMAN	1	72.2671	1.72267	Dengue	QC	NaN	NaN	NaN	21.6267	1.00446
Dengue / QC	_NTVISVNPSTK_	P19320	0.478782	0.478782	5.55956e-05	7.18883e-05	98	P19320	VCAM1	Vascular cell adhesion protein 1	VCAM1_HUMAN	1	39.3567	1.39357	Dengue	QC	NaN	NaN	NaN	78.9595	0.155649
Dengue / QC	_PC[Carbamidomethyl (C)]FSALEVDET[HexN]YVPKEFNAETFTFHADIC[Carbamidomethyl (C)]TLSEKER_	P02768	0.862023	0.862023	5.5706e-05	7.19996e-05	82	P02768	ALB	Serum albumin	ALBU_HUMAN	1	81.7585	1.81758	Dengue	QC	NaN	NaN	NaN	26.7798	0.194012
Dengue / QC	_SPVGVQPILNEHTFC[Carbamidomethyl (C)]AGMSK_	P00738	0.522789	0.522789	5.59862e-05	7.23298e-05	176	P00738	HP	Haptoglobin	HPT_HUMAN	1	43.673	1.43673	Dengue	QC	NaN	NaN	NaN	85.9388	0.140748
Dengue / QC	_YVYIAELLAHK_	P27169	0.163764	0.163764	5.62116e-05	7.25573e-05	108	P27169	PON1	Serum paraoxonase/arylesterase 1	PON1_HUMAN	1	12.0206	1.12021	Dengue	QC	NaN	NaN	NaN	77.7801	0.0954524
Dengue / QC	_IIGGSDADIK_	P09871	0.176178	0.176178	5.65307e-05	7.28893e-05	56	P09871	C1S	Complement C1s subcomponent	C1S_HUMAN	1	12.9886	1.12989	Dengue	QC	NaN	NaN	NaN	45.8642	0.0809446
Dengue / QC	_NLRENGYEC[Carbamidomethyl (C)]EWR_	P04275	0.835077	0.835077	5.67844e-05	7.32004e-05	68	P04275	VWF	von Willebrand factor	VWF_HUMAN	1	78.3952	1.78395	Dengue	QC	NaN	NaN	NaN	51.5636	0.193298
Dengue / QC	_SHKSYSC[Carbamidomethyl (C)]QVTHEGSTVEK_	P0DOY3	0.988646	0.988646	5.68445e-05	7.32458e-05	150	P0DOY3	IGLC3	Immunoglobulin lambda constant 3	IGLC3_HUMAN	1	98.4322	1.98432	Dengue	QC	NaN	NaN	NaN	143.275	0.259394
Dengue / QC	_EYESYSDFER_	P07358	0.175906	0.175906	5.68342e-05	7.32458e-05	90	P07358	C8B	Complement component C8 beta chain	CO8B_HUMAN	1	12.9673	1.12967	Dengue	QC	NaN	NaN	NaN	70.4257	0.0926255
Dengue / QC	_ASQSISSWLAWYQQKPGKAPK_	P01602	-0.667953	0.667953	5.69994e-05	7.34132e-05	176	P01602	IGKV1-5	Immunoglobulin kappa variable 1-5	KV105_HUMAN	1	-37.0601	0.629399	Dengue	QC	NaN	NaN	NaN	50.339	0.160557
Dengue / QC	_DSHSLTTNIMEILR_	P02671	1.88673	1.88673	5.70465e-05	7.3448e-05	72	P02671	FGA	Fibrinogen alpha chain	FIBA_HUMAN	1	269.797	3.69797	Dengue	QC	NaN	NaN	NaN	43.6168	0.256671
Dengue / QC	_SFMLLILER_	P05543	0.226868	0.226868	5.75789e-05	7.40624e-05	80	P05543	SERPINA7	Thyroxine-binding globulin	THBG_HUMAN	1	17.0292	1.17029	Dengue	QC	NaN	NaN	NaN	27.3334	0.171317
Dengue / QC	_SSPYYALR_	A0A0C4DFP6;Q9NQ79;Q9NQ79-2	0.720499	0.720499	5.76447e-05	7.41309e-05	98	A0A0C4DFP6;Q9NQ79;Q9NQ79-2	CRTAC1	Cartilage acidic protein 1;Cartilage acidic protein 1;Isoform 2 of Cartilage acidic protein 1	A0A0C4DFP6_HUMAN;CRAC1_HUMAN;CRAC1_HUMAN	1	64.7752	1.64775	Dengue	QC	NaN	NaN	NaN	60.6394	0.14596
Dengue / QC	_YKAAFT[Hex]EC[Carbamidomethyl (C)]C[Carbamidomethyl (C)]QAADKAAC[Carbamidomethyl (C)]LLPK_	P02768	0.683639	0.683639	5.76781e-05	7.41576e-05	66	P02768	ALB	Serum albumin	ALBU_HUMAN	1	60.6186	1.60619	Dengue	QC	NaN	NaN	NaN	54.9034	0.146717
Dengue / QC	_EYVLPSFEVIVEPTEK_	P01024	0.437831	0.437831	5.78632e-05	7.43792e-05	168	P01024	C3	Complement C3	CO3_HUMAN	1	35.4567	1.35457	Dengue	QC	NaN	NaN	NaN	139.388	0.0830848
Dengue / QC	_SC[Carbamidomethyl (C)]DSLNNRC[Carbamidomethyl (C)]EGSSVQTR_	P07996	1.91164	1.91164	5.86106e-05	7.52908e-05	36	P07996	THBS1	Thrombospondin-1	TSP1_HUMAN	1	276.236	3.76236	Dengue	QC	NaN	NaN	NaN	24.9002	0.328974
Dengue / QC	_TRKGNVATEISTER_	P04114	1.53925	1.53925	5.91101e-05	7.58661e-05	52	P04114	APOB	Apolipoprotein B-100	APOB_HUMAN	1	190.643	2.90643	Dengue	QC	NaN	NaN	NaN	26.9856	0.250893
Dengue / QC	_ASQGISS[Hex]ALAWYQQKPGKAPK_	A0A0B4J2D9;P0DP09	0.853393	0.853393	6.08942e-05	7.7986e-05	30	A0A0B4J2D9;P0DP09	IGKV1D-13;IGKV1-13	Immunoglobulin kappa variable 1D-13;Immunoglobulin kappa variable 1-13	KVD13_HUMAN;KV113_HUMAN	1	80.6746	1.80675	Dengue	QC	NaN	NaN	NaN	19.1116	0.209533
Dengue / QC	_HKVY[Hex]AC[Carbamidomethyl (C)]EVTHQGLSSPVTK_	P01834	0.27819	0.27819	6.12623e-05	7.84022e-05	126	P01834	IGKC	Immunoglobulin kappa constant	IGKC_HUMAN	1	21.2673	1.21267	Dengue	QC	NaN	NaN	NaN	69.5616	0.249949
Dengue / QC	_FTNIGPDTMR_	P02751;P02751-15;P02751-3;P02751-7	0.19277	0.19277	6.18508e-05	7.90734e-05	160	P02751;P02751-15;P02751-3;P02751-7	FN1	Fibronectin;Isoform 15 of Fibronectin;Isoform 3 of Fibronectin;Isoform 7 of Fibronectin	FINC_HUMAN	1	14.2956	1.14296	Dengue	QC	NaN	NaN	NaN	137.606	0.0716655
Dengue / QC	_GRFTISRDNAK_	P01782	1.47539	1.47539	6.18999e-05	7.91019e-05	74	P01782	IGHV3-9	Immunoglobulin heavy variable 3-9	HV309_HUMAN	1	178.058	2.78058	Dengue	QC	NaN	NaN	NaN	47.3017	0.329782
Dengue / QC	_ASGYTFTSYAMHWVR_	A0A0C4DH29	2.11726	2.11726	6.19954e-05	7.91894e-05	50	A0A0C4DH29	IGHV1-3	Immunoglobulin heavy variable 1-3	HV103_HUMAN	1	333.87	4.3387	Dengue	QC	NaN	NaN	NaN	28.063	0.467698
Dengue / QC	_SQC[Carbamidomethyl (C)]TYSNPEGTVVLAC[Carbamidomethyl (C)]DQAQC[Carbamidomethyl (C)]R_	P22792	0.377621	0.377621	6.20181e-05	7.92013e-05	176	P22792	CPN2	Carboxypeptidase N subunit 2	CPN2_HUMAN	1	29.9198	1.2992	Dengue	QC	NaN	NaN	NaN	109.436	0.0804581
Dengue / QC	_ELSHLPSLYDYSAYRR_	P10643	0.621766	0.621766	6.23736e-05	7.96379e-05	38	P10643	C7	Complement component C7	CO7_HUMAN	1	53.8758	1.53876	Dengue	QC	NaN	NaN	NaN	27.8251	0.131867
Dengue / QC	_TRFVYHLSDLC[Carbamidomethyl (C)]K_	P01591	0.994079	0.994079	6.28951e-05	8.02341e-05	126	P01591	JCHAIN	Immunoglobulin J chain	IGJ_HUMAN	1	99.1809	1.99181	Dengue	QC	NaN	NaN	NaN	105.801	0.202436
Dengue / QC	_ALRLPPTTTC[Carbamidomethyl (C)]QQQK_	B4E1Z4	0.530353	0.530353	6.29239e-05	8.02535e-05	98	B4E1Z4	NaN	cDNA FLJ55673, highly similar to Complement factor B (EC 3.4.21.47)	B4E1Z4_HUMAN	1	44.4283	1.44428	Dengue	QC	NaN	NaN	NaN	88.1536	0.120017
Dengue / QC	_C[Carbamidomethyl (C)]MADKTLPEC[Carbamidomethyl (C)]SKLPNNVLQEK_	P43652	0.516687	0.516687	6.32533e-05	8.06038e-05	84	P43652	AFM	Afamin	AFAM_HUMAN	1	43.0666	1.43067	Dengue	QC	NaN	NaN	NaN	45.2183	0.296771
Dengue / QC	_ANVFVQLPR_	P35858;P35858-2	0.650222	0.650222	6.34523e-05	8.08133e-05	36	P35858;P35858-2	IGFALS	Insulin-like growth factor-binding protein complex acid labile subunit;Isoform 2 of Insulin-like growth factor-binding protein complex acid labile subunit	ALS_HUMAN	1	56.9409	1.56941	Dengue	QC	NaN	NaN	NaN	30.1565	0.10538
Dengue / QC	_NILTSNNIDVK_	P05090	-0.309996	0.309996	6.35558e-05	8.09192e-05	162	P05090	APOD	Apolipoprotein D	APOD_HUMAN	1	-19.3356	0.806644	Dengue	QC	NaN	NaN	NaN	102.419	0.0692219
Dengue / QC	_LSSVTAADTAVYYC[Carbamidomethyl (C)]AR_	A0A075B6R2	-0.464354	0.464354	6.43073e-05	8.17699e-05	176	A0A075B6R2	IGHV4-4	Immunoglobulin heavy variable 4-4	HV404_HUMAN	1	-27.5204	0.724796	Dengue	QC	NaN	NaN	NaN	73.3743	0.105614
Dengue / QC	_T[HexN]PRDK[HexN]LAAC[Carbamidomethyl (C)]LEGNC[Carbamidomethyl (C)]AEGLGTNYR_	P00734	-0.133899	0.133899	6.48507e-05	8.24075e-05	34	P00734	F2	Prothrombin	THRB_HUMAN	1	-8.86352	0.911365	Dengue	QC	NaN	NaN	NaN	10.0773	0.854494
Dengue / QC	_AGDFLEANYM[Oxidation (M)]NLQR_	P01024	-0.604324	0.604324	6.49551e-05	8.25223e-05	160	P01024	C3	Complement C3	CO3_HUMAN	1	-34.2221	0.657779	Dengue	QC	NaN	NaN	NaN	49.939	0.131661
Dengue / QC	_AGNNMLLVGVHGPR_	P21333;P21333-2;Q5HY54	0.383208	0.383208	6.52722e-05	8.2838e-05	86	P21333;P21333-2;Q5HY54	FLNA	Filamin-A;Isoform 2 of Filamin-A;Filamin-A	FLNA_HUMAN;FLNA_HUMAN;Q5HY54_HUMAN	1	30.4239	1.30424	Dengue	QC	NaN	NaN	NaN	78.2602	0.0981296
Dengue / QC	_KEVYMPSSIFQDDFVIPDISEPGTWK_	P0C0L5	0.705313	0.705313	6.55375e-05	8.31545e-05	96	P0C0L5	C4B	Complement C4-B	CO4B_HUMAN	1	63.0498	1.6305	Dengue	QC	NaN	NaN	NaN	33.0852	0.14436
Dengue / QC	_STATISGLKPGVDYTITVYAVTGR_	P02751;P02751-15;P02751-3;P02751-7	0.442001	0.442001	6.60497e-05	8.36961e-05	154	P02751;P02751-15;P02751-3;P02751-7	FN1	Fibronectin;Isoform 15 of Fibronectin;Isoform 3 of Fibronectin;Isoform 7 of Fibronectin	FINC_HUMAN	1	35.8488	1.35849	Dengue	QC	NaN	NaN	NaN	106.83	0.107694
Dengue / QC	_HPNVFGFC[Carbamidomethyl (C)]R_	P04196	-0.342849	0.342849	6.60776e-05	8.36984e-05	176	P04196	HRG	Histidine-rich glycoprotein	HRG_HUMAN	1	-21.1517	0.788483	Dengue	QC	NaN	NaN	NaN	64.5586	0.0704891
Dengue / QC	_DSITTWEILAVSM[Oxidation (M)]SDKK_	P01024	1.0992	1.0992	6.61098e-05	8.37002e-05	30	P01024	C3	Complement C3	CO3_HUMAN	1	114.235	2.14235	Dengue	QC	NaN	NaN	NaN	14.5814	0.150366
Dengue / QC	_VTIMWTPPESAVTGYR_	P02751;P02751-15;P02751-3;P02751-7	0.431714	0.431714	6.66549e-05	8.42997e-05	152	P02751;P02751-15;P02751-3;P02751-7	FN1	Fibronectin;Isoform 15 of Fibronectin;Isoform 3 of Fibronectin;Isoform 7 of Fibronectin	FINC_HUMAN	1	34.8835	1.34884	Dengue	QC	NaN	NaN	NaN	145.92	0.103983
Dengue / QC	_ELNELGSK_	B4E1Z4	0.440704	0.440704	6.74524e-05	8.51985e-05	32	B4E1Z4	NaN	cDNA FLJ55673, highly similar to Complement factor B (EC 3.4.21.47)	B4E1Z4_HUMAN	1	35.7266	1.35727	Dengue	QC	NaN	NaN	NaN	22.4903	0.125434
Dengue / QC	_NSITLTNLTPGTEYVVSIVALNGREESPLLIGQQSTVSDVPR_	P02751;P02751-15;P02751-3;P02751-7	1.0087	1.0087	6.76065e-05	8.53748e-05	40	P02751;P02751-15;P02751-3;P02751-7	FN1	Fibronectin;Isoform 15 of Fibronectin;Isoform 3 of Fibronectin;Isoform 7 of Fibronectin	FINC_HUMAN	1	101.21	2.0121	Dengue	QC	NaN	NaN	NaN	6.86521	0.175127
Dengue / QC	_ALLVGEHLNIIVTPK_	P01031	0.29872	0.29872	6.77137e-05	8.54919e-05	88	P01031	C5	Complement C5	CO5_HUMAN	1	23.0053	1.23005	Dengue	QC	NaN	NaN	NaN	31.4588	0.138942
Dengue / QC	_FQSVFTVTR_	P02747	-0.279673	0.279673	6.81702e-05	8.60313e-05	176	P02747	C1QC	Complement C1q subcomponent subunit C	C1QC_HUMAN	1	-17.6222	0.823778	Dengue	QC	NaN	NaN	NaN	54.6041	0.063263
Dengue / QC	_KLSSWVLLMK_	P01009	-0.301567	0.301567	6.97338e-05	8.78539e-05	162	P01009	SERPINA1	Alpha-1-antitrypsin	A1AT_HUMAN	1	-18.8629	0.811371	Dengue	QC	NaN	NaN	NaN	137.796	0.0777319
Dengue / QC	_HLVC[Carbamidomethyl (C)]NGDQDC[Carbamidomethyl (C)]LDGSDEDDC[Carbamidomethyl (C)]EDVR_	P07357	0.480698	0.480698	6.97545e-05	8.78611e-05	82	P07357	C8A	Complement component C8 alpha chain	CO8A_HUMAN	1	39.5418	1.39542	Dengue	QC	NaN	NaN	NaN	24.7913	0.0979517
Dengue / QC	_WVMVPMMSLHHLTIPYFR_	P01011	0.428758	0.428758	7.05889e-05	8.88361e-05	140	P01011	SERPINA3	Alpha-1-antichymotrypsin	AACT_HUMAN	1	34.6074	1.34607	Dengue	QC	NaN	NaN	NaN	78.873	0.108199
Dengue / QC	_M[Oxidation (M)]PC[Carbamidomethyl (C)]AEDYLSVVLNQLC[Carbamidomethyl (C)]VLHEKTPVSDRVTK_	P02768	1.30458	1.30458	7.06867e-05	8.89402e-05	48	P02768	ALB	Serum albumin	ALBU_HUMAN	1	147.011	2.47011	Dengue	QC	NaN	NaN	NaN	37.0324	0.268694
Dengue / QC	_VSGYTFTDYYMHWVQQAPGK_	A0A0G2JMI3	1.70244	1.70244	7.07118e-05	8.89527e-05	30	A0A0G2JMI3	IGHV1-69-2	Immunoglobulin heavy variable 1-69-2	HV692_HUMAN	1	225.45	3.2545	Dengue	QC	NaN	NaN	NaN	16.5407	0.309503
Dengue / QC	_EYSTC[Carbamidomethyl (C)]TSEGR_	P14780	1.7489	1.7489	7.13828e-05	8.96435e-05	18	P14780	MMP9	Matrix metalloproteinase-9	MMP9_HUMAN	1	236.102	3.36102	Dengue	QC	NaN	NaN	NaN	9.53252	0.310403
Dengue / QC	_LSC[Carbamidomethyl (C)]AASGFTFDDYAM[Oxidation (M)]HWVR_	P01782	0.553697	0.553697	7.17195e-05	9.00279e-05	92	P01782	IGHV3-9	Immunoglobulin heavy variable 3-9	HV309_HUMAN	1	46.7842	1.46784	Dengue	QC	NaN	NaN	NaN	73.594	0.130342
Dengue / QC	_YFKPGM[Oxidation (M)]PFDLM[Oxidation (M)]VFVTNPDGSPAYR_	P01024	-0.12124	0.12124	7.18802e-05	9.02104e-05	38	P01024	C3	Complement C3	CO3_HUMAN	1	-8.06031	0.919397	Dengue	QC	NaN	NaN	NaN	4.06516	0.371024
Dengue / QC	_M[Oxidation (M)]GPKGEPGDPVNLLR_	O75636	-0.463779	0.463779	7.27115e-05	9.11177e-05	170	O75636	FCN3	Ficolin-3	FCN3_HUMAN	1	-27.4915	0.725085	Dengue	QC	NaN	NaN	NaN	64.151	0.110005
Dengue / QC	_AVGSGATFSHYYYMILSRGQIVFMNREPK_	P0C0L5	0.376338	0.376338	7.279e-05	9.11773e-05	108	P0C0L5	C4B	Complement C4-B	CO4B_HUMAN	1	29.8043	1.29804	Dengue	QC	NaN	NaN	NaN	56.4197	0.104798
Dengue / QC	_SPLNDFQVLR_	G3XAK1;P26927	1.26968	1.26968	7.27795e-05	9.11773e-05	14	G3XAK1;P26927	MST1	Hepatocyte growth factor-like protein	G3XAK1_HUMAN;HGFL_HUMAN	1	141.107	2.41107	Dengue	QC	NaN	NaN	NaN	8.88835	0.22009
Dengue / QC	_WEM[Oxidation (M)]PFDPQDTHQSR_	P01011	1.28371	1.28371	7.32877e-05	9.17617e-05	22	P01011	SERPINA3	Alpha-1-antichymotrypsin	AACT_HUMAN	1	143.464	2.43464	Dengue	QC	NaN	NaN	NaN	14.0932	0.275276
Dengue / QC	_ETTLGDMTGK_	P80108	0.403753	0.403753	7.39396e-05	9.2422e-05	50	P80108	GPLD1	Phosphatidylinositol-glycan-specific phospholipase D	PHLD_HUMAN	1	32.2945	1.32295	Dengue	QC	NaN	NaN	NaN	38.9796	0.09331
Dengue / QC	_SVSDGIAALDLNAVANKIADFELPTIIVPEQTIEIPSIK_	P04114	0.673028	0.673028	7.44142e-05	9.29546e-05	124	P04114	APOB	Apolipoprotein B-100	APOB_HUMAN	1	59.4416	1.59442	Dengue	QC	NaN	NaN	NaN	12.6731	0.193586
Dengue / QC	_LLIYDASSLESGVPSR_	A0A0B4J2D9;P0DP09	-0.601472	0.601472	7.46569e-05	9.32182e-05	142	A0A0B4J2D9;P0DP09	IGKV1D-13;IGKV1-13	Immunoglobulin kappa variable 1D-13;Immunoglobulin kappa variable 1-13	KVD13_HUMAN;KV113_HUMAN	1	-34.0919	0.659081	Dengue	QC	NaN	NaN	NaN	128.599	0.150337
Dengue / QC	_LPYTIITTPPLKDFSLWEK_	P04114	0.545657	0.545657	7.51238e-05	9.3682e-05	116	P04114	APOB	Apolipoprotein B-100	APOB_HUMAN	1	45.9685	1.45969	Dengue	QC	NaN	NaN	NaN	91.2394	0.0970989
Dengue / QC	_AGMQTPFLIMDR_	A0A0A0MRJ7;P12259	0.351693	0.351693	7.5387e-05	9.39703e-05	30	A0A0A0MRJ7;P12259	F5	Coagulation factor V	A0A0A0MRJ7_HUMAN;FA5_HUMAN	1	27.6057	1.27606	Dengue	QC	NaN	NaN	NaN	16.3056	0.11451
Dengue / QC	_ESSSHHPGIAEFPSR_	P02671	1.54225	1.54225	7.72445e-05	9.59808e-05	168	P02671	FGA	Fibrinogen alpha chain	FIBA_HUMAN	1	191.248	2.91248	Dengue	QC	NaN	NaN	NaN	152.685	0.314332
Dengue / QC	_FQEEEKSLLHLK_	P27169	0.377301	0.377301	7.74064e-05	9.61617e-05	96	P27169	PON1	Serum paraoxonase/arylesterase 1	PON1_HUMAN	1	29.8909	1.29891	Dengue	QC	NaN	NaN	NaN	70.7626	0.0855558
Dengue / QC	_LYHSEAFTVNFGDTEEAKK_	P01009	-0.35213	0.35213	7.75184e-05	9.62602e-05	158	P01009	SERPINA1	Alpha-1-antitrypsin	A1AT_HUMAN	1	-21.6574	0.783426	Dengue	QC	NaN	NaN	NaN	66.8936	0.0907705
Dengue / QC	_VAFPLEVVQK_	Q9NPH3-5	0.586269	0.586269	7.75411e-05	9.62681e-05	40	Q9NPH3-5	IL1RAP	Isoform 4 of Interleukin-1 receptor accessory protein	IL1AP_HUMAN	1	50.1359	1.50136	Dengue	QC	NaN	NaN	NaN	26.3453	0.129647
Dengue / QC	_DVMQGTDEHVVC[Carbamidomethyl (C)]K_	P01871	-0.267881	0.267881	7.80132e-05	9.67726e-05	154	P01871	IGHM	Immunoglobulin heavy constant mu	IGHM_HUMAN	1	-16.9461	0.830539	Dengue	QC	NaN	NaN	NaN	81.4424	0.0820341
Dengue / QC	_NIQSLEVIGK_	P02775	-0.313967	0.313967	7.81379e-05	9.69068e-05	172	P02775	PPBP	Platelet basic protein	CXCL7_HUMAN	1	-19.5573	0.804427	Dengue	QC	NaN	NaN	NaN	65.9192	0.0702917
Dengue / QC	_VTMSVDTSK_	A0A0C4DH34	-0.366778	0.366778	7.87416e-05	9.75938e-05	174	A0A0C4DH34	IGHV4-28	Immunoglobulin heavy variable 4-28	HV428_HUMAN	1	-22.4488	0.775512	Dengue	QC	NaN	NaN	NaN	66.745	0.0973804
Dengue / QC	_FTISTDNSK_	A0A075B7B8	0.850992	0.850992	7.96007e-05	9.85134e-05	16	A0A075B7B8	IGHV3OR16-12	Immunoglobulin heavy variable 3/OR16-12 (non-functional) (Fragment)	A0A075B7B8_HUMAN	1	80.3741	1.80374	Dengue	QC	NaN	NaN	NaN	9.90087	0.151048
Dengue / QC	_IIPGFMC[Carbamidomethyl (C)]QGGDFTR_	P62937	0.743488	0.743488	8.03451e-05	9.93511e-05	52	P62937	PPIA	Peptidyl-prolyl cis-trans isomerase A	PPIA_HUMAN	1	67.4218	1.67422	Dengue	QC	NaN	NaN	NaN	39.7431	0.144092
Dengue / QC	_GYQLSDVDGVTC[Carbamidomethyl (C)]EDIDEC[Carbamidomethyl (C)]ALPTGGHIC[Carbamidomethyl (C)]SYR_	P23142	0.571459	0.571459	8.19331e-05	0.000101166	108	P23142	FBLN1	Fibulin-1	FBLN1_HUMAN	1	48.6025	1.48603	Dengue	QC	NaN	NaN	NaN	77.5446	0.124317
Dengue / QC	_DGNTLTYYR_	P02748	-0.45735	0.45735	8.30571e-05	0.00010239	168	P02748	C9	Complement component C9	CO9_HUMAN	1	-27.1677	0.728323	Dengue	QC	NaN	NaN	NaN	52.1726	0.0977427
Dengue / QC	_FSMPSPVR_	A0A0C4DFP6;Q9NQ79;Q9NQ79-2	0.61254	0.61254	8.33945e-05	0.000102776	56	A0A0C4DFP6;Q9NQ79;Q9NQ79-2	CRTAC1	Cartilage acidic protein 1;Cartilage acidic protein 1;Isoform 2 of Cartilage acidic protein 1	A0A0C4DFP6_HUMAN;CRAC1_HUMAN;CRAC1_HUMAN	1	52.8949	1.52895	Dengue	QC	NaN	NaN	NaN	33.1835	0.182831
Dengue / QC	_LSFVKVDSHFR_	P01023	-0.606453	0.606453	8.35384e-05	0.000102932	170	P01023	A2M	Alpha-2-macroglobulin	A2MG_HUMAN	1	-34.319	0.65681	Dengue	QC	NaN	NaN	NaN	49.9352	0.149866
Dengue / QC	_GAYPLSIEPIGVR_	P00450	-0.501502	0.501502	8.42311e-05	0.000103634	176	P00450	CP	Ceruloplasmin	CERU_HUMAN	1	-29.3629	0.706371	Dengue	QC	NaN	NaN	NaN	48.3191	0.106241
Dengue / QC	_SASNM[Oxidation (M)]AIVDVK_	P01023	-0.539236	0.539236	8.44663e-05	0.000103853	176	P01023	A2M	Alpha-2-macroglobulin	A2MG_HUMAN	1	-31.1865	0.688135	Dengue	QC	NaN	NaN	NaN	50.1293	0.131596
Dengue / QC	_WC[Carbamidomethyl (C)]AVSEHEATKC[Carbamidomethyl (C)]QSFR_	P02787	1.73289	1.73289	8.44839e-05	0.000103853	104	P02787	TF	Serotransferrin	TRFE_HUMAN	1	232.392	3.32392	Dengue	QC	NaN	NaN	NaN	87.2675	0.35569
Dengue / QC	_TNTGLALR_	P04275	0.532978	0.532978	8.52471e-05	0.000104709	46	P04275	VWF	von Willebrand factor	VWF_HUMAN	1	44.6913	1.44691	Dengue	QC	NaN	NaN	NaN	40.8981	0.128032
Dengue / QC	_LFDSDPITVTVPVEVSR_	P10909;P10909-2;P10909-4;P10909-5	0.254299	0.254299	8.53918e-05	0.000104865	172	P10909;P10909-2;P10909-4;P10909-5	CLU	Clusterin;Isoform 2 of Clusterin;Isoform 4 of Clusterin;Isoform 5 of Clusterin	CLUS_HUMAN	1	19.2756	1.19276	Dengue	QC	NaN	NaN	NaN	121.703	0.0732635
Dengue / QC	_LLIYDNNKRPSGIPDR_	P01701	-0.379319	0.379319	8.5428e-05	0.000104887	162	P01701	IGLV1-51	Immunoglobulin lambda variable 1-51	LV151_HUMAN	1	-23.12	0.7688	Dengue	QC	NaN	NaN	NaN	109.231	0.0926267
Dengue / QC	_YYGGGYGSTQATFMVFQALAQYQK_	P01024	0.534558	0.534558	8.57847e-05	0.000105303	130	P01024	C3	Complement C3	CO3_HUMAN	1	44.8498	1.4485	Dengue	QC	NaN	NaN	NaN	92.8408	0.166926
Dengue / QC	_ADSSPVKAGVETTTPSKQSNNK_	P0DOY2	2.01605	2.01605	8.58739e-05	0.000105391	78	P0DOY2	IGLC2	Immunoglobulin lambda constant 2	IGLC2_HUMAN	1	304.476	4.04476	Dengue	QC	NaN	NaN	NaN	59.0994	0.32416
Dengue / QC	_AQTTVTC[Carbamidomethyl (C)]M[Oxidation (M)]ENGWSPTPR_	P08603	0.533218	0.533218	8.61069e-05	0.000105611	128	P08603	CFH	Complement factor H	CFAH_HUMAN	1	44.7153	1.44715	Dengue	QC	NaN	NaN	NaN	75.474	0.117506
Dengue / QC	_LNRVNDAQEYR_	Q9UGM5	0.821277	0.821277	8.63749e-05	0.000105889	28	Q9UGM5	FETUB	Fetuin-B	FETUB_HUMAN	1	76.6969	1.76697	Dengue	QC	NaN	NaN	NaN	15.2728	0.185801
Dengue / QC	_HDGNMVFSPFGMSLAMTGLMLGATGPTETQIKR_	G3V2W1;Q9UK55	0.986901	0.986901	8.63878e-05	0.000105889	24	G3V2W1;Q9UK55	SERPINA10	Protein Z-dependent protease inhibitor	G3V2W1_HUMAN;ZPI_HUMAN	1	98.1923	1.98192	Dengue	QC	NaN	NaN	NaN	12.6376	0.243251
Dengue / QC	_RIFSPFADLSELSATGR_	G3V2W1;Q9UK55	0.626202	0.626202	8.67095e-05	0.000106208	40	G3V2W1;Q9UK55	SERPINA10	Protein Z-dependent protease inhibitor	G3V2W1_HUMAN;ZPI_HUMAN	1	54.3496	1.5435	Dengue	QC	NaN	NaN	NaN	15.3182	0.124645
Dengue / QC	_LKQVLLHQQAK_	E7ER44;P02788	0.363962	0.363962	8.68273e-05	0.000106317	26	E7ER44;P02788	LTF	Lactotransferrin	E7ER44_HUMAN;TRFL_HUMAN	1	28.6955	1.28696	Dengue	QC	NaN	NaN	NaN	18.9301	0.259595
Dengue / QC	_SQIFSTASDNQPTVTIK_	P11021	1.09836	1.09836	8.83674e-05	0.000107956	22	P11021	HSPA5	78 kDa glucose-regulated protein	GRP78_HUMAN	1	114.111	2.14111	Dengue	QC	NaN	NaN	NaN	13.1547	0.264015
Dengue / QC	_TC[Carbamidomethyl (C)]RVEC[Carbamidomethyl (C)]SDNLFTQR_	P48740	1.56606	1.56606	8.8925e-05	0.000108592	24	P48740	MASP1	Mannan-binding lectin serine protease 1	MASP1_HUMAN	1	196.095	2.96095	Dengue	QC	NaN	NaN	NaN	14.4386	0.400821
Dengue / QC	_SLLSNVEGDNAVPMQHNNRPTQPLKGR_	P00915	2.17287	2.17287	9.00546e-05	0.000109903	52	P00915	CA1	Carbonic anhydrase 1	CAH1_HUMAN	1	350.92	4.5092	Dengue	QC	NaN	NaN	NaN	41.8292	0.315951
Dengue / QC	_ANRPFLVFIR_	P01008	-0.315175	0.315175	9.02503e-05	0.000110119	166	P01008	SERPINC1	Antithrombin-III	ANT3_HUMAN	1	-19.6247	0.803753	Dengue	QC	NaN	NaN	NaN	88.9601	0.0691722
Dengue / QC	_EPAHLMSLFGGKPMIIYK_	P06396	0.297293	0.297293	9.14431e-05	0.000111436	116	P06396	GSN	Gelsolin	GELS_HUMAN	1	22.8837	1.22884	Dengue	QC	NaN	NaN	NaN	70.5759	0.0829193
Dengue / QC	_AVGNLRKC[Carbamidomethyl (C)]STSSLLEAC[Carbamidomethyl (C)]TFR_	P02787	0.0147524	0.0147524	9.15833e-05	0.00011156	96	P02787	TF	Serotransferrin	TRFE_HUMAN	1	1.0278	1.01028	Dengue	QC	NaN	NaN	NaN	36.4791	0.488478
Dengue / QC	_LPPNVVEESAR_	P01023	-0.358193	0.358193	9.24131e-05	0.000112524	176	P01023	A2M	Alpha-2-macroglobulin	A2MG_HUMAN	1	-21.9859	0.780141	Dengue	QC	NaN	NaN	NaN	83.0314	0.0880581
Dengue / QC	_TPGIWLLHC[Carbamidomethyl (C)]HVTDHIHAGM[Oxidation (M)]ETTYTVLQNEDTK_	P00450	0.318469	0.318469	9.2736e-05	0.000112848	36	P00450	CP	Ceruloplasmin	CERU_HUMAN	1	24.7007	1.24701	Dengue	QC	NaN	NaN	NaN	3.4	0.379083
Dengue / QC	_AITPPHPASQANIIFDITEGNLR_	P23142	0.489026	0.489026	9.27729e-05	0.000112869	150	P23142	FBLN1	Fibulin-1	FBLN1_HUMAN	1	40.3497	1.4035	Dengue	QC	NaN	NaN	NaN	109.175	0.102938
Dengue / QC	_ATLVC[Carbamidomethyl (C)]LISDFYPGAVTVAWKADGSPVK_	A0A0B4J231;B9A064	1.13501	1.13501	9.31419e-05	0.000113248	148	A0A0B4J231;B9A064	IGLL5	Immunoglobulin lambda-like polypeptide 5	A0A0B4J231_HUMAN;IGLL5_HUMAN	1	119.62	2.1962	Dengue	QC	NaN	NaN	NaN	38.0206	0.181544
Dengue / QC	_QVC[Carbamidomethyl (C)]TDINEC[Carbamidomethyl (C)]ETGQHNC[Carbamidomethyl (C)]VPNSVC[Carbamidomethyl (C)]INTR_	G3XAP6;P49747	0.902185	0.902185	9.50072e-05	0.000115349	36	G3XAP6;P49747	COMP	Cartilage oligomeric matrix protein	G3XAP6_HUMAN;COMP_HUMAN	1	86.8895	1.86889	Dengue	QC	NaN	NaN	NaN	26.3245	0.235237
Dengue / QC	_PLLEKSHC[Carbamidomethyl (C)]IAEVENDEMPADLPSLAADFVESK_	P02768	0.302976	0.302976	9.58535e-05	0.000116223	98	P02768	ALB	Serum albumin	ALBU_HUMAN	1	23.3686	1.23369	Dengue	QC	NaN	NaN	NaN	51.834	0.301382
Dengue / QC	_LVGGDNLC[Carbamidomethyl (C)]SGR_	O43866	-0.412022	0.412022	9.64772e-05	0.000116917	170	O43866	CD5L	CD5 antigen-like	CD5L_HUMAN	1	-24.8431	0.751569	Dengue	QC	NaN	NaN	NaN	66.4626	0.113621
Dengue / QC	_ETC[Carbamidomethyl (C)]FAEEGK_	P02768	2.27327	2.27327	9.65612e-05	0.000116994	116	P02768	ALB	Serum albumin	ALBU_HUMAN	1	383.418	4.83418	Dengue	QC	NaN	NaN	NaN	58.4966	0.385415
Dengue / QC	_FDHVITNMNNNYEPR_	D6R934;P02746	-0.354485	0.354485	9.72126e-05	0.000117711	172	D6R934;P02746	C1QB	Complement C1q subcomponent subunit B	D6R934_HUMAN;C1QB_HUMAN	1	-21.7851	0.782149	Dengue	QC	NaN	NaN	NaN	41.4861	0.086918
Dengue / QC	_KPVDEYK_	P02787	0.918815	0.918815	9.78085e-05	0.000118384	110	P02787	TF	Serotransferrin	TRFE_HUMAN	1	89.0562	1.89056	Dengue	QC	NaN	NaN	NaN	39.2722	0.184888
Dengue / QC	_AVGDK[Hex]LPEC[Carbamidomethyl (C)]EADDGC[Carbamidomethyl (C)]PKPPEIAHGYVEHSVR_	P00738	0.807237	0.807237	9.80849e-05	0.000118694	106	P00738	HP	Haptoglobin	HPT_HUMAN	1	74.9858	1.74986	Dengue	QC	NaN	NaN	NaN	74.2001	0.284162
Dengue / QC	_QKDVDKEFYLFPTVFDEN[Hex]ESLLLEDNIR_	P00450	0.893206	0.893206	9.83969e-05	0.000119047	136	P00450	CP	Ceruloplasmin	CERU_HUMAN	1	85.7299	1.8573	Dengue	QC	NaN	NaN	NaN	35.3355	0.203008
Dengue / QC	_LKMLEVPYVDR_	P00742	0.941964	0.941964	9.98862e-05	0.000120576	46	P00742	F10	Coagulation factor X	FA10_HUMAN	1	92.1142	1.92114	Dengue	QC	NaN	NaN	NaN	29.5355	0.164223
Dengue / QC	_LLIYSNNQRPSGVPDR_	P01699	-0.514319	0.514319	0.000101035	0.000121863	172	P01699	IGLV1-44	Immunoglobulin lambda variable 1-44	LV144_HUMAN	1	-29.9877	0.700123	Dengue	QC	NaN	NaN	NaN	55.5441	0.115319
Dengue / QC	_SGQSEDRQPVPGQQMTLK_	P01024	-0.367851	0.367851	0.000101251	0.000122031	176	P01024	C3	Complement C3	CO3_HUMAN	1	-22.5064	0.774936	Dengue	QC	NaN	NaN	NaN	44.2403	0.0953553
Dengue / QC	_QGALELIK_	P01024	-0.460943	0.460943	0.000102961	0.000123932	176	P01024	C3	Complement C3	CO3_HUMAN	1	-27.3489	0.726511	Dengue	QC	NaN	NaN	NaN	41.6353	0.112054
Dengue / QC	_QDNEILIFWSK_	P02741	0.908837	0.908837	0.000103312	0.000124304	112	P02741	CRP	C-reactive protein	CRP_HUMAN	1	87.7531	1.87753	Dengue	QC	NaN	NaN	NaN	95.1515	0.226013
Dengue / QC	_VPVLMESR_	O00391	0.126559	0.126559	0.000105304	0.000126422	98	O00391	QSOX1	Sulfhydryl oxidase 1	QSOX1_HUMAN	1	9.16866	1.09169	Dengue	QC	NaN	NaN	NaN	36.0229	0.0907796
Dengue / QC	_SGNTFRPEVHLLPPPSEELALNELVTLTC[Carbamidomethyl (C)]LAR_	A0A0G2JMB2	0.751257	0.751257	0.000105661	0.000126767	164	A0A0G2JMB2	IGHA2	Immunoglobulin heavy constant alpha 2 (Fragment)	A0A0G2JMB2_HUMAN	1	68.3259	1.68326	Dengue	QC	NaN	NaN	NaN	145.123	0.193463
Dengue / QC	_C[Carbamidomethyl (C)]QSFRDHMK_	P02787	0.919481	0.919481	0.000106153	0.000127331	166	P02787	TF	Serotransferrin	TRFE_HUMAN	1	89.1435	1.89144	Dengue	QC	NaN	NaN	NaN	143.774	0.191124
Dengue / QC	_EHSSLAFWK_	P02749	0.210913	0.210913	0.000107059	0.000128235	164	P02749	APOH	Beta-2-glycoprotein 1	APOH_HUMAN	1	15.742	1.15742	Dengue	QC	NaN	NaN	NaN	129.352	0.055929
Dengue / QC	_TKELTSELKENFIR_	P80188;P80188-2;X6R8F3	1.61636	1.61636	0.000109068	0.000130483	22	P80188;P80188-2;X6R8F3	LCN2	Neutrophil gelatinase-associated lipocalin;Isoform 2 of Neutrophil gelatinase-associated lipocalin;Neutrophil gelatinase-associated lipocalin	NGAL_HUMAN;NGAL_HUMAN;X6R8F3_HUMAN	1	206.601	3.06601	Dengue	QC	NaN	NaN	NaN	11.9654	0.289945
Dengue / QC	_WNPSPPAC[Carbamidomethyl (C)]EPNSC[Carbamidomethyl (C)]INLPDIPHASWETYPRPTK_	P04003	0.47343	0.47343	0.000109312	0.000130748	58	P04003	C4BPA	C4b-binding protein alpha chain	C4BPA_HUMAN	1	38.8407	1.38841	Dengue	QC	NaN	NaN	NaN	5.50329	0.179763
Dengue / QC	_VLLDGVQNPRAEDLVGK_	P01024	0.743014	0.743014	0.000110623	0.000132182	108	P01024	C3	Complement C3	CO3_HUMAN	1	67.3668	1.67367	Dengue	QC	NaN	NaN	NaN	87.934	0.164117
Dengue / QC	_VC[Carbamidomethyl (C)]GLC[Carbamidomethyl (C)]GNFDGIQNNDLTSSNLQVEEDPVDFGNSWK_	P04275	1.75323	1.75323	0.00011088	0.000132462	16	P04275	VWF	von Willebrand factor	VWF_HUMAN	1	237.112	3.37112	Dengue	QC	NaN	NaN	NaN	10.0335	0.333054
Dengue / QC	_C[Carbamidomethyl (C)]QFFSYATQTFHKAEYR_	H0YAC1;P03952	1.7871	1.7871	0.000110904	0.000132464	24	H0YAC1;P03952	KLKB1	Plasma kallikrein (Fragment);Plasma kallikrein	H0YAC1_HUMAN;KLKB1_HUMAN	1	245.121	3.45121	Dengue	QC	NaN	NaN	NaN	10.8297	0.267218
Dengue / QC	_KYWNDC[Carbamidomethyl (C)]EPPDSR_	P04196	-0.296556	0.296556	0.000111109	0.000132681	176	P04196	HRG	Histidine-rich glycoprotein	HRG_HUMAN	1	-18.5806	0.814194	Dengue	QC	NaN	NaN	NaN	84.8471	0.076549
Dengue / QC	_ILGGHLDAK_	P00738	-0.598459	0.598459	0.000111299	0.000132881	176	P00738	HP	Haptoglobin	HPT_HUMAN	1	-33.9541	0.660459	Dengue	QC	NaN	NaN	NaN	49.7058	0.164615
Dengue / QC	_AMAVEDIISR_	P07357	-0.424055	0.424055	0.000111677	0.000133254	154	P07357	C8A	Complement component C8 alpha chain	CO8A_HUMAN	1	-25.4673	0.745327	Dengue	QC	NaN	NaN	NaN	47.4082	0.0894894
Dengue / QC	_ESEQGVYTC[Carbamidomethyl (C)]TAQGIWKNEQK_	B4DPQ0	0.393051	0.393051	0.000111795	0.000133312	78	B4DPQ0	C1R	Complement C1r subcomponent	B4DPQ0_HUMAN	1	31.3168	1.31317	Dengue	QC	NaN	NaN	NaN	45.3502	0.0983858
Dengue / QC	_EQDLEVILHNGAC[Carbamidomethyl (C)]SPGAR_	P04275	0.685689	0.685689	0.000111921	0.000133407	34	P04275	VWF	von Willebrand factor	VWF_HUMAN	1	60.847	1.60847	Dengue	QC	NaN	NaN	NaN	29.2066	0.167583
Dengue / QC	_AKFEELNMDLFR_	P11021	0.779049	0.779049	0.000112855	0.000134467	26	P11021	HSPA5	78 kDa glucose-regulated protein	GRP78_HUMAN	1	71.6	1.716	Dengue	QC	NaN	NaN	NaN	16.7898	0.272535
Dengue / QC	_AEDTALYYC[Carbamidomethyl (C)]AK_	P01782	-0.474467	0.474467	0.000112913	0.000134508	176	P01782	IGHV3-9	Immunoglobulin heavy variable 3-9	HV309_HUMAN	1	-28.0267	0.719733	Dengue	QC	NaN	NaN	NaN	56.3991	0.113405
Dengue / QC	_HTFM[Oxidation (M)]GVVSLGSPSGEVSHPR_	P02765	-0.320941	0.320941	0.000113676	0.000135309	176	P02765	AHSG	Alpha-2-HS-glycoprotein	FETUA_HUMAN	1	-19.9452	0.800548	Dengue	QC	NaN	NaN	NaN	72.744	0.0807544
Dengue / QC	_SGVPVSLVK_	Q8TDL5	0.922221	0.922221	0.000114374	0.000136001	22	Q8TDL5	BPIFB1	BPI fold-containing family B member 1	BPIB1_HUMAN	1	89.503	1.89503	Dengue	QC	NaN	NaN	NaN	15.3066	0.254449
Dengue / QC	_TEDSSSFLIDK_	P05543	0.554408	0.554408	0.000114506	0.000136124	44	P05543	SERPINA7	Thyroxine-binding globulin	THBG_HUMAN	1	46.8566	1.46857	Dengue	QC	NaN	NaN	NaN	34.5221	0.115487
Dengue / QC	_SLSC[Carbamidomethyl (C)]RPPMVK_	P04275	3.21161	3.21161	0.000115325	0.000136994	18	P04275	VWF	von Willebrand factor	VWF_HUMAN	1	826.385	9.26385	Dengue	QC	NaN	NaN	NaN	11.6075	0.544772
Dengue / QC	_LKEEIGKELEELR_	P06727	0.854374	0.854374	0.000115349	0.000136994	44	P06727	APOA4	Apolipoprotein A-IV	APOA4_HUMAN	1	80.7974	1.80797	Dengue	QC	NaN	NaN	NaN	8.93434	0.167389
Dengue / QC	_TYGLC[Carbamidomethyl (C)]GIC[Carbamidomethyl (C)]DENGANDFMLR_	P04275	2.21759	2.21759	0.000116069	0.000137789	14	P04275	VWF	von Willebrand factor	VWF_HUMAN	1	365.117	4.65117	Dengue	QC	NaN	NaN	NaN	7.4471	0.381269
Dengue / QC	_ATTVTGTPC[Carbamidomethyl (C)]QDWAAQEPHR_	P00747	0.198404	0.198404	0.000116131	0.000137812	176	P00747	PLG	Plasminogen	PLMN_HUMAN	1	14.7428	1.14743	Dengue	QC	NaN	NaN	NaN	76.3531	0.0502731
Dengue / QC	_TDGEGALSEPSATVTIEELAAPPPPVLM[Oxidation (M)]HHGESSQVLHPGNK_	P04217	0.516339	0.516339	0.000117601	0.000139444	122	P04217	A1BG	Alpha-1B-glycoprotein	A1BG_HUMAN	1	43.0321	1.43032	Dengue	QC	NaN	NaN	NaN	91.2537	0.10872
Dengue / QC	_MDAHPPR_	P06396	0.541265	0.541265	0.000117723	0.000139534	110	P06396	GSN	Gelsolin	GELS_HUMAN	1	45.5248	1.45525	Dengue	QC	NaN	NaN	NaN	84.9283	0.144097
Dengue / QC	_TAAISGYSFK_	P03951	0.410944	0.410944	0.000118549	0.000140427	74	P03951	F11	Coagulation factor XI	FA11_HUMAN	1	32.9556	1.32956	Dengue	QC	NaN	NaN	NaN	66.7568	0.105414
Dengue / QC	_ALLAYAFALAGNQDKRK_	P01023	0.58091	0.58091	0.000118984	0.000140914	112	P01023	A2M	Alpha-2-macroglobulin	A2MG_HUMAN	1	49.5793	1.49579	Dengue	QC	NaN	NaN	NaN	100.576	0.112533
Dengue / QC	_ADVLTTGAGNPVGDKLNVITVGPR_	P04040	2.02397	2.02397	0.000119357	0.000141298	26	P04040	CAT	Catalase	CATA_HUMAN	1	306.702	4.06702	Dengue	QC	NaN	NaN	NaN	11.7608	0.326275
Dengue / QC	_FLEPFDIDDHQQVHC[Carbamidomethyl (C)]PYDQLQIYANGK_	B4DPQ0	0.302362	0.302362	0.000121006	0.000143193	146	B4DPQ0	C1R	Complement C1r subcomponent	B4DPQ0_HUMAN	1	23.3162	1.23316	Dengue	QC	NaN	NaN	NaN	85.1494	0.0723507
Dengue / QC	_DSGEDPATC[Carbamidomethyl (C)]AFQR_	Q13103	0.246001	0.246001	0.000122879	0.000145264	66	Q13103	SPP2	Secreted phosphoprotein 24	SPP24_HUMAN	1	18.5915	1.18592	Dengue	QC	NaN	NaN	NaN	56.7246	0.106505
Dengue / QC	_TELRPGETLNVNFLLR_	P01024	0.337648	0.337648	0.000123253	0.000145518	176	P01024	C3	Complement C3	CO3_HUMAN	1	26.3695	1.26369	Dengue	QC	NaN	NaN	NaN	137.973	0.0736432
Dengue / QC	_NPDSGKQPWC[Carbamidomethyl (C)]YTTDPC[Carbamidomethyl (C)]VR_	P08519	2.44894	2.44894	0.000123897	0.000146067	52	P08519	LPA	Apolipoprotein(a)	APOA_HUMAN	1	446.016	5.46016	Dengue	QC	NaN	NaN	NaN	26.1867	0.381333
Dengue / QC	_YYIAASYVK_	Q92820	0.616069	0.616069	0.000123906	0.000146067	46	Q92820	GGH	Gamma-glutamyl hydrolase	GGH_HUMAN	1	53.2693	1.53269	Dengue	QC	NaN	NaN	NaN	22.1308	0.119909
Dengue / QC	_TTDVTQTFGIEK_	Q04756	0.305877	0.305877	0.000124267	0.000146434	106	Q04756	HGFAC	Hepatocyte growth factor activator	HGFA_HUMAN	1	23.617	1.23617	Dengue	QC	NaN	NaN	NaN	83.0707	0.0925825
Dengue / QC	_TFPGFFSPM[Oxidation (M)]LGEFVSETESR_	P02671	1.1732	1.1732	0.000124248	0.000146434	174	P02671	FGA	Fibrinogen alpha chain	FIBA_HUMAN	1	125.511	2.25511	Dengue	QC	NaN	NaN	NaN	106.442	0.423985
Dengue / QC	_DTDRFSSHVGGTLGQFYQEVLWGSPAASDDGRR_	Q14624	0.480311	0.480311	0.000125557	0.000147806	156	Q14624	ITIH4	Inter-alpha-trypsin inhibitor heavy chain H4	ITIH4_HUMAN	1	39.5044	1.39504	Dengue	QC	NaN	NaN	NaN	66.1168	0.106096
Dengue / QC	_RLYGSEAFATDFQDSAAAKK_	P01011	-0.293479	0.293479	0.000126227	0.000148564	168	P01011	SERPINA3	Alpha-1-antichymotrypsin	AACT_HUMAN	1	-18.4068	0.815932	Dengue	QC	NaN	NaN	NaN	139.813	0.0768619
Dengue / QC	_VPFDAATLHTSTAMAAQHGMDDDGTGQK_	P06396	0.313186	0.313186	0.000127586	0.000150074	146	P06396	GSN	Gelsolin	GELS_HUMAN	1	24.2448	1.24245	Dengue	QC	NaN	NaN	NaN	126.187	0.0780318
Dengue / QC	_FSGSGSGTDFTLK_	A0A087X0Q4	-0.308297	0.308297	0.000128206	0.000150773	176	A0A087X0Q4	IGKV2-40	Immunoglobulin kappa variable 2-40	A0A087X0Q4_HUMAN	1	-19.2406	0.807594	Dengue	QC	NaN	NaN	NaN	74.139	0.0706093
Dengue / QC	_QGIPFFGQVR_	P01023	-0.609604	0.609604	0.000130448	0.000153349	176	P01023	A2M	Alpha-2-macroglobulin	A2MG_HUMAN	1	-34.4623	0.655377	Dengue	QC	NaN	NaN	NaN	51.9252	0.124975
Dengue / QC	_MDMTFSK_	P04114	0.292097	0.292097	0.000131906	0.000154908	120	P04114	APOB	Apolipoprotein B-100	APOB_HUMAN	1	22.4419	1.22442	Dengue	QC	NaN	NaN	NaN	112.43	0.0673752
Dengue / QC	_C[Carbamidomethyl (C)]VEISC[Carbamidomethyl (C)]KSPDVINGSPISQK_	P08603	0.65838	0.65838	0.000132399	0.000155425	152	P08603	CFH	Complement factor H	CFAH_HUMAN	1	57.831	1.57831	Dengue	QC	NaN	NaN	NaN	138.972	0.1409
Dengue / QC	_EYTDASFTNRK_	P00450	-0.338224	0.338224	0.000132461	0.000155466	176	P00450	CP	Ceruloplasmin	CERU_HUMAN	1	-20.8986	0.791014	Dengue	QC	NaN	NaN	NaN	56.9087	0.0933939
Dengue / QC	_SNLC[Carbamidomethyl (C)]ALC[Carbamidomethyl (C)]IGDEQGENKC[Carbamidomethyl (C)]VPNSNER_	E7ER44;P02788	1.45351	1.45351	0.000132599	0.000155597	22	E7ER44;P02788	LTF	Lactotransferrin	E7ER44_HUMAN;TRFL_HUMAN	1	173.873	2.73873	Dengue	QC	NaN	NaN	NaN	15.9137	0.299334
Dengue / QC	_VASYGVKPR_	B4E1Z4	-0.495454	0.495454	0.000133462	0.000156517	86	B4E1Z4	NaN	cDNA FLJ55673, highly similar to Complement factor B (EC 3.4.21.47)	B4E1Z4_HUMAN	1	-29.0661	0.709339	Dengue	QC	NaN	NaN	NaN	43.4208	0.14526
Dengue / QC	_IADFELPTIIVPEQTIEIPSIK_	P04114	0.220978	0.220978	0.000134641	0.000157774	174	P04114	APOB	Apolipoprotein B-100	APOB_HUMAN	1	16.5524	1.16552	Dengue	QC	NaN	NaN	NaN	149.648	0.0616486
Dengue / QC	_VAYDLVYYVR_	Q9Y6R7	0.682182	0.682182	0.000134952	0.000158044	118	Q9Y6R7	FCGBP	IgGFc-binding protein	FCGBP_HUMAN	1	60.4564	1.60456	Dengue	QC	NaN	NaN	NaN	87.9506	0.196148
Dengue / QC	_QLSLPETGELDSATLK_	P14780	0.596002	0.596002	0.000135007	0.000158077	56	P14780	MMP9	Matrix metalloproteinase-9	MMP9_HUMAN	1	51.1522	1.51152	Dengue	QC	NaN	NaN	NaN	33.4276	0.172356
Dengue / QC	_QVGSGVTTDQVQAEAK_	P01871	-0.48973	0.48973	0.000135251	0.0001583	174	P01871	IGHM	Immunoglobulin heavy constant mu	IGHM_HUMAN	1	-28.7842	0.712158	Dengue	QC	NaN	NaN	NaN	57.8425	0.110579
Dengue / QC	_SIAQYWLGC[Carbamidomethyl (C)]PAPGHL_	P04004	0.36716	0.36716	0.000136197	0.000159185	176	P04004	VTN	Vitronectin	VTNC_HUMAN	1	28.9812	1.28981	Dengue	QC	NaN	NaN	NaN	108.577	0.094011
Dengue / QC	_KTLQALEFHTVPFQLLAR_	Q08380	0.567056	0.567056	0.000136359	0.000159343	106	Q08380	LGALS3BP	Galectin-3-binding protein	LG3BP_HUMAN	1	48.1497	1.4815	Dengue	QC	NaN	NaN	NaN	89.6514	0.149992
Dengue / QC	_EPQVYTLPPSREEMTKNQVSLTC[Carbamidomethyl (C)]LVK_	P01860	1.14436	1.14436	0.000136588	0.000159547	138	P01860	IGHG3	Immunoglobulin heavy constant gamma 3	IGHG3_HUMAN	1	121.049	2.21049	Dengue	QC	NaN	NaN	NaN	119.44	0.224908
Dengue / QC	_VYAC[Carbamidomethyl (C)]EVTHQGLSSPVTKSFNRGEC[Carbamidomethyl (C)]_	P01834	0.769474	0.769474	0.000136666	0.000159607	90	P01834	IGKC	Immunoglobulin kappa constant	IGKC_HUMAN	1	70.4649	1.70465	Dengue	QC	NaN	NaN	NaN	67.084	0.151794
Dengue / QC	_DISEVVTPR_	B4E1Z4	-0.250762	0.250762	0.000136695	0.000159609	176	B4E1Z4	NaN	cDNA FLJ55673, highly similar to Complement factor B (EC 3.4.21.47)	B4E1Z4_HUMAN	1	-15.9548	0.840452	Dengue	QC	NaN	NaN	NaN	50.738	0.0670978
Dengue / QC	_LQSLFDSPDFSKITGKPIK_	P36955	0.33352	0.33352	0.000137912	0.00016087	44	P36955	SERPINF1	Pigment epithelium-derived factor	PEDF_HUMAN	1	26.0084	1.26008	Dengue	QC	NaN	NaN	NaN	29.178	0.10618
Dengue / QC	_SASLHLPKLSITGTYDLKSVLGQLGITK_	P01009	0.465597	0.465597	0.000138817	0.000161829	164	P01009	SERPINA1	Alpha-1-antitrypsin	A1AT_HUMAN	1	38.0889	1.38089	Dengue	QC	NaN	NaN	NaN	115.027	0.1407
Dengue / QC	_MGPTELLIEMEDWKGDK_	P02675	2.03604	2.03604	0.000139362	0.000162368	50	P02675	FGB	Fibrinogen beta chain	FIBB_HUMAN	1	310.12	4.1012	Dengue	QC	NaN	NaN	NaN	33.971	0.37032
Dengue / QC	_LTVAAPPSGGPGFLSIEWPDSRPPR_	A0A140TA49	13.662	13.662	0.000140119	0.000163104	10	A0A140TA49	C4A	Complement C4-A	A0A140TA49_HUMAN	1	1.29605e+06	12961.5	Dengue	QC	NaN	NaN	NaN	3.30738	0.379669
Dengue / QC	_GQPREPQVYTLPPSREEMTK_	P01860	-0.344797	0.344797	0.000142038	0.000165191	176	P01860	IGHG3	Immunoglobulin heavy constant gamma 3	IGHG3_HUMAN	1	-21.2581	0.787419	Dengue	QC	NaN	NaN	NaN	75.867	0.0912888
Dengue / QC	_VDAFC[Carbamidomethyl (C)]GGSIVNEK_	P00740	0.307376	0.307376	0.000142145	0.000165283	100	P00740	F9	Coagulation factor IX	FA9_HUMAN	1	23.7455	1.23746	Dengue	QC	NaN	NaN	NaN	83.1646	0.0787692
Dengue / QC	_FGSGYVSGWGR_	P00740	0.390478	0.390478	0.000144073	0.000167327	76	P00740	F9	Coagulation factor IX	FA9_HUMAN	1	31.0827	1.31083	Dengue	QC	NaN	NaN	NaN	66.7644	0.0753859
Dengue / QC	_QIKKQTALVELVK_	P02768	1.13041	1.13041	0.000145305	0.000168548	170	P02768	ALB	Serum albumin	ALBU_HUMAN	1	118.921	2.18921	Dengue	QC	NaN	NaN	NaN	126.523	0.295559
Dengue / QC	_SETEIHQGFQHLHQLFAK_	P08185	0.76488	0.76488	0.000145427	0.000168633	104	P08185	SERPINA6	Corticosteroid-binding globulin	CBG_HUMAN	1	69.9229	1.69923	Dengue	QC	NaN	NaN	NaN	60.8125	0.112931
Dengue / QC	_A[Acetyl (Protein N-term)]GITTIEAVKR_	A0A087WWU8;P06753-2	0.930877	0.930877	0.000148826	0.000172202	18	A0A087WWU8;P06753-2	TPM3	Tropomyosin alpha-3 chain;Isoform 2 of Tropomyosin alpha-3 chain	A0A087WWU8_HUMAN;TPM3_HUMAN	1	90.6435	1.90644	Dengue	QC	NaN	NaN	NaN	12.0561	0.154472
Dengue / QC	_SRVTISVDTSK_	P06331	-0.904616	0.904616	0.000152625	0.000176321	150	P06331	IGHV4-34	Immunoglobulin heavy variable 4-34	HV434_HUMAN	1	-46.5825	0.534175	Dengue	QC	NaN	NaN	NaN	44.8609	0.179643
Dengue / QC	_WELALGR_	P02649	0.286461	0.286461	0.000153498	0.000177155	86	P02649	APOE	Apolipoprotein E	APOE_HUMAN	1	21.9645	1.21964	Dengue	QC	NaN	NaN	NaN	73.781	0.0842859
[truncated: 17,383 more rows]
