# Supplementary material for: Re-mining serum proteomics data reveals extensive post-translational modifications upon Zika and dengue infection
Source: Royal Society of Chemistry journal article supplement (doi:10.1039/d2mo00258b), 2023-02-15
Supplement: d2mo00258b6.xlsx [file d2mo00258b6.xlsx]

## Sheet: 200629_Zika_DIA_PTM_Methyl_HTRM
Comparison (group1/group2)	Group	ProteinGroups	AVG Log2 Ratio	Absolute AVG Log2 Ratio	Pvalue	Qvalue	# of Ratios	UniProtIds	Genes	ProteinDescriptions	ProteinNames	# Unique Total Peptides	% Change	Ratio	Condition Numerator	Condition Denominator	GO Cellular Component	GO Molecular Function	GO Biological Process	Degrees Of Freedom	Standard Error
Dengue / QC	_DVDKEFYLFPTVFDENESLLLEDNIR_	P00450	1.77304	1.77304	1.76552e-47	4.94697e-44	168	P00450	CP	Ceruloplasmin	CERU_HUMAN	1	241.773	3.41773	Dengue	QC	NaN	NaN	NaN	162.332	0.0846255
Dengue / QC	_VEKFDLVPVPTNLYGDFFTGDAYVILK_	P06396	1.6063	1.6063	1.07303e-46	2.00442e-43	158	P06396	GSN	Gelsolin	GELS_HUMAN	1	204.471	3.04471	Dengue	QC	NaN	NaN	NaN	143.29	0.0718196
Dengue / QC	_LYLKHQM[Oxidation (M)]DLVATLSQLGLQELFQAPDLR_	P08697	1.45803	1.45803	4.38507e-40	3.51056e-37	124	P08697	SERPINF2	Alpha-2-antiplasmin	A2AP_HUMAN	1	174.733	2.74733	Dengue	QC	NaN	NaN	NaN	107.503	0.125412
Dengue / QC	_AK[Methyl (KR)]LPDATPTELAK_	D6RF35	3.91677	3.91677	6.21326e-38	3.86879e-35	74	D6RF35	GC	Vitamin D-binding protein	D6RF35_HUMAN	1	1410.31	15.1031	Dengue	QC	NaN	NaN	NaN	51.6084	0.105413
Dengue / QC	_TIDQMLNSELQWPVPDIYLR_	P04114	1.41962	1.41962	1.61312e-36	8.21809e-34	96	P04114	APOB	Apolipoprotein B-100	APOB_HUMAN	1	167.515	2.67515	Dengue	QC	NaN	NaN	NaN	84.113	0.061312
Dengue / QC	_YSQPEDSLIPFFEITVPESQLTVSQFTLPK_	P04114	1.15739	1.15739	1.90713e-36	8.90631e-34	168	P04114	APOB	Apolipoprotein B-100	APOB_HUMAN	1	123.054	2.23054	Dengue	QC	NaN	NaN	NaN	120.365	0.0650035
Dengue / QC	_PK[Dimethyl (KR)]DTLM[Oxidation (M)]ISR[Dimethyl (KR)]TPEVTC[Carbamidomethyl (C)]VVVDVSHEDPEVQFK_	P01860	-0.026022	0.026022	4.05923e-35	1.51653e-32	142	P01860	IGHG3	Immunoglobulin heavy constant gamma 3	IGHG3_HUMAN	1	-1.78754	0.982125	Dengue	QC	NaN	NaN	NaN	89.2441	0.145863
Dengue / QC	_FFESFGDLSTPDAVM[Oxidation (M)]GNPK_	P68871	0.836408	0.836408	6.40161e-35	2.11027e-32	90	P68871	HBB	Hemoglobin subunit beta	HBB_HUMAN	1	78.5599	1.7856	Dengue	QC	NaN	NaN	NaN	83.235	0.041117
Dengue / QC	_YDPSLKPLSVSYDQATSLR_	P00918	1.7054	1.7054	1.62438e-34	4.79106e-32	82	P00918	CA2	Carbonic anhydrase 2	CAH2_HUMAN	1	226.119	3.26119	Dengue	QC	NaN	NaN	NaN	61.2999	0.0599043
Dengue / QC	_ESATITC[Carbamidomethyl (C)]LVTGFSPADVFVQWMQR_	P01871	1.29179	1.29179	2.64296e-34	6.73234e-32	172	P01871	IGHM	Immunoglobulin heavy constant mu	IGHM_HUMAN	1	144.832	2.44832	Dengue	QC	NaN	NaN	NaN	149.647	0.0837052
Dengue / QC	_TLADLTLLDSPIKVPLLLSEPINIIDALEMR_	P04114	2.10903	2.10903	4.48329e-34	1.09236e-31	140	P04114	APOB	Apolipoprotein B-100	APOB_HUMAN	1	331.401	4.31401	Dengue	QC	NaN	NaN	NaN	108.253	0.136159
Dengue / QC	_LRLEPGKEYLIM[Oxidation (M)]GLDGATYDLEGHPQYLLDSNSWIEEMPSER_	P0C0L5	0.777783	0.777783	1.16607e-33	2.51334e-31	126	P0C0L5	C4B	Complement C4-B	CO4B_HUMAN	1	71.4494	1.71449	Dengue	QC	NaN	NaN	NaN	79.8326	0.157571
Dengue / QC	_QGQIIYNWQGAQSTQDEVAASAILTAQLDEELGGTPVQSR_	P06396	1.30744	1.30744	1.68261e-33	3.49235e-31	134	P06396	GSN	Gelsolin	GELS_HUMAN	1	147.501	2.47501	Dengue	QC	NaN	NaN	NaN	108.55	0.0782326
Dengue / QC	_TAMDVFVC[Carbamidomethyl (C)]TYFMPAAQLPELPDVELPTNKDVC[Carbamidomethyl (C)]DPGNTK_	P02774;P02774-3	1.15338	1.15338	2.53651e-33	5.07664e-31	168	P02774;P02774-3	GC	Vitamin D-binding protein;Isoform 3 of Vitamin D-binding protein	VTDB_HUMAN	1	122.434	2.22434	Dengue	QC	NaN	NaN	NaN	138.384	0.0774231
Dengue / QC	_IHEDSDSALQLQDFYQEVANPLLTAVTFEYPSNAVEEVTQNNFR_	Q14624	1.45033	1.45033	7.49869e-33	1.43408e-30	152	Q14624	ITIH4	Inter-alpha-trypsin inhibitor heavy chain H4	ITIH4_HUMAN	1	173.271	2.73271	Dengue	QC	NaN	NaN	NaN	133.84	0.0875458
Dengue / QC	_DVFLGMFLYEYAR_	P02768	1.04562	1.04562	9.52228e-33	1.72138e-30	176	P02768	ALB	Serum albumin	ALBU_HUMAN	1	106.426	2.06426	Dengue	QC	NaN	NaN	NaN	171.493	0.0717968
Dengue / QC	_LYLKHQMDLVATLSQLGLQELFQAPDLR_	P08697	1.71571	1.71571	1.40528e-32	2.461e-30	156	P08697	SERPINF2	Alpha-2-antiplasmin	A2AP_HUMAN	1	228.457	3.28457	Dengue	QC	NaN	NaN	NaN	144.349	0.104568
Dengue / QC	_DLEVVAATPTSLLISWDAPAVTVR_	P02751;P02751-15;P02751-3;P02751-7	1.43994	1.43994	1.95693e-32	3.22548e-30	168	P02751;P02751-15;P02751-3;P02751-7	FN1	Fibronectin;Isoform 15 of Fibronectin;Isoform 3 of Fibronectin;Isoform 7 of Fibronectin	FINC_HUMAN	1	171.31	2.7131	Dengue	QC	NaN	NaN	NaN	156.911	0.0995203
Dengue / QC	_PYTFHSHGITYYK_	P00450	-0.647924	0.647924	7.06912e-32	1.07069e-29	48	P00450	CP	Ceruloplasmin	CERU_HUMAN	1	-36.1802	0.638198	Dengue	QC	NaN	NaN	NaN	33.6464	0.140637
Dengue / QC	_SGAGTEDSAC[Carbamidomethyl (C)]IPWAYYSTVDQVKDLYSGLIGPLIVC[Carbamidomethyl (C)]R_	P00450	1.60006	1.60006	7.40567e-32	1.09214e-29	164	P00450	CP	Ceruloplasmin	CERU_HUMAN	1	203.157	3.03157	Dengue	QC	NaN	NaN	NaN	148.27	0.108897
Dengue / QC	_TDGC[Carbamidomethyl (C)]QHFC[Carbamidomethyl (C)]LPGQESYTC[Carbamidomethyl (C)]SC[Carbamidomethyl (C)]AQGYR_	P22891;P22891-2	1.30983	1.30983	1.84813e-31	2.65562e-29	74	P22891;P22891-2	PROZ	Vitamin K-dependent protein Z;Isoform 2 of Vitamin K-dependent protein Z	PROZ_HUMAN	1	147.913	2.47913	Dengue	QC	NaN	NaN	NaN	59.9298	0.114464
Dengue / QC	_AVDQSVLLMKPEAELSVSSVYNLLTVK_	P20742	0.247159	0.247159	2.68497e-31	3.58252e-29	86	P20742	PZP	Pregnancy zone protein	PZP_HUMAN	1	18.6867	1.18687	Dengue	QC	NaN	NaN	NaN	42.6231	0.240284
Dengue / QC	_AAPSVTLFPPSSEELQANKATLVC[Carbamidomethyl (C)]LISDFYPGAVTVAWK_	P0DOY2	2.08604	2.08604	7.35774e-31	9.16284e-29	170	P0DOY2	IGLC2	Immunoglobulin lambda constant 2	IGLC2_HUMAN	1	324.582	4.24582	Dengue	QC	NaN	NaN	NaN	140.005	0.146181
Dengue / QC	_TAMDVFVC[Carbamidomethyl (C)]TYFMPAAQLPELPDVELPTNK_	P02774;P02774-3	1.37247	1.37247	1.90075e-30	2.21912e-28	130	P02774;P02774-3	GC	Vitamin D-binding protein;Isoform 3 of Vitamin D-binding protein	VTDB_HUMAN	1	158.913	2.58913	Dengue	QC	NaN	NaN	NaN	116.309	0.0885048
Dengue / QC	_VTIM[Oxidation (M)]WTPPESAVTGYRVDVIPVNLPGEHGQR_	P02751;P02751-15;P02751-3;P02751-7	0.572106	0.572106	2.62587e-30	3.00314e-28	96	P02751;P02751-15;P02751-3;P02751-7	FN1	Fibronectin;Isoform 15 of Fibronectin;Isoform 3 of Fibronectin;Isoform 7 of Fibronectin	FINC_HUMAN	1	48.6693	1.48669	Dengue	QC	NaN	NaN	NaN	59.4148	0.149375
Dengue / QC	_EVYMPSSIFQDDFVIPDISEPGTWK_	P0C0L5	1.0075	1.0075	4.01999e-30	4.33231e-28	174	P0C0L5	C4B	Complement C4-B	CO4B_HUMAN	1	101.042	2.01042	Dengue	QC	NaN	NaN	NaN	132.886	0.0714201
Dengue / QC	_YGGGFYSTQDTINAIEGLTEYSLLVK_	P01031	0.991986	0.991986	4.30709e-30	4.51069e-28	144	P01031	C5	Complement C5	CO5_HUMAN	1	98.8921	1.98892	Dengue	QC	NaN	NaN	NaN	132.632	0.0698782
Dengue / QC	_GGPLDGTYR_	P00918	0.983452	0.983452	4.96252e-30	5.05636e-28	66	P00918	CA2	Carbonic anhydrase 2	CAH2_HUMAN	1	97.7191	1.97719	Dengue	QC	NaN	NaN	NaN	57.3029	0.0576409
Dengue / QC	_AVYTC[Carbamidomethyl (C)]NEGYQLLGEINYREC[Carbamidomethyl (C)]DTDGWTNDIPIC[Carbamidomethyl (C)]EVVK_	P08603	-0.641241	0.641241	2.60052e-29	2.31322e-27	38	P08603	CFH	Complement factor H	CFAH_HUMAN	1	-35.8839	0.641161	Dengue	QC	NaN	NaN	NaN	28.9744	0.150884
Dengue / QC	_LTVDKSRWQEGNVFSC[Carbamidomethyl (C)]SVMHEALHNHYTQK_	P01861	1.42011	1.42011	2.70953e-29	2.37254e-27	76	P01861	IGHG4	Immunoglobulin heavy constant gamma 4	IGHG4_HUMAN	1	167.606	2.67606	Dengue	QC	NaN	NaN	NaN	42.4867	0.366584
Dengue / QC	_ANPTVTLFPPSSEELQANKATLVC[Carbamidomethyl (C)]LISDFYPGAVTVAWK_	A0A0B4J231;B9A064	1.87756	1.87756	3.39256e-29	2.88059e-27	166	A0A0B4J231;B9A064	IGLL5	Immunoglobulin lambda-like polypeptide 5	A0A0B4J231_HUMAN;IGLL5_HUMAN	1	267.454	3.67454	Dengue	QC	NaN	NaN	NaN	156.426	0.131787
Dengue / QC	_I[Acetyl (Protein N-term)]THR[Dimethyl (KR)]IHWESASLLR_	P01024	-0.0847901	0.0847901	7.53206e-29	6.02995e-27	170	P01024	C3	Complement C3	CO3_HUMAN	1	-5.70783	0.942922	Dengue	QC	NaN	NaN	NaN	72.9686	0.214169
Dengue / QC	_RIHEDSDSALQLQDFYQEVANPLLTAVTFEYPSNAVEEVTQNNFR_	Q14624	1.20797	1.20797	1.29172e-28	9.91619e-27	166	Q14624	ITIH4	Inter-alpha-trypsin inhibitor heavy chain H4	ITIH4_HUMAN	1	131.012	2.31012	Dengue	QC	NaN	NaN	NaN	119.631	0.0852395
Dengue / QC	_AKSPPTMVDSLLAVTLAGNLGLTFLR_	Q96PD5	1.57107	1.57107	1.62533e-28	1.1829e-26	118	Q96PD5	PGLYRP2	N-acetylmuramoyl-L-alanine amidase	PGRP2_HUMAN	1	197.125	2.97125	Dengue	QC	NaN	NaN	NaN	107.005	0.10334
Dengue / QC	_KDDIMLDEGMLQSLMELPDQYNYGMYAK_	P07357	1.13533	1.13533	6.65926e-28	4.55104e-26	90	P07357	C8A	Complement component C8 alpha chain	CO8A_HUMAN	1	119.669	2.19669	Dengue	QC	NaN	NaN	NaN	74.2089	0.0660922
Dengue / QC	_SWVPHTFESELSDPVELLVAES_	P04217	0.818859	0.818859	7.6791e-28	5.18478e-26	176	P04217	A1BG	Alpha-1B-glycoprotein	A1BG_HUMAN	1	76.4011	1.76401	Dengue	QC	NaN	NaN	NaN	137.962	0.0662809
Dengue / QC	_GTELQHLLHAVVPGPWQEDVADAEEC[Carbamidomethyl (C)]AGR_	G3XAK1;P26927	1.18415	1.18415	1.37867e-27	8.9838e-26	122	G3XAK1;P26927	MST1	Hepatocyte growth factor-like protein	G3XAK1_HUMAN;HGFL_HUMAN	1	127.23	2.2723	Dengue	QC	NaN	NaN	NaN	105.464	0.103582
Dengue / QC	_VFPLSLC[Carbamidomethyl (C)]STQPDGNVVIAC[Carbamidomethyl (C)]LVQGFFPQEPLSVTWSESGQGVTAR_	P01876	2.19345	2.19345	1.73311e-27	1.10367e-25	160	P01876	IGHA1	Immunoglobulin heavy constant alpha 1	IGHA1_HUMAN	1	357.397	4.57397	Dengue	QC	NaN	NaN	NaN	143.851	0.1708
Dengue / QC	_LSLESLTSYFSIESSTKGDVK_	P04114	0.860876	0.860876	2.13792e-27	1.33121e-25	138	P04114	APOB	Apolipoprotein B-100	APOB_HUMAN	1	81.614	1.81614	Dengue	QC	NaN	NaN	NaN	133.154	0.0731653
Dengue / QC	_QPNC[Carbamidomethyl (C)]DDPETEEAALVAIDYINQNLPWGYK_	P02765	0.973815	0.973815	2.69713e-27	1.64291e-25	170	P02765	AHSG	Alpha-2-HS-glycoprotein	FETUA_HUMAN	1	96.4028	1.96403	Dengue	QC	NaN	NaN	NaN	124.61	0.0719129
Dengue / QC	_QMSK[Methyl (KR)]YPSGER_	P08603	0.851136	0.851136	4.86665e-27	2.78293e-25	74	P08603	CFH	Complement factor H	CFAH_HUMAN	1	80.3921	1.80392	Dengue	QC	NaN	NaN	NaN	54.6942	0.148448
Dengue / QC	_NGESVKLHLETDSLALVALGALDTALYAAGSK_	P0C0L5	1.75863	1.75863	8.28249e-27	4.46299e-25	154	P0C0L5	C4B	Complement C4-B	CO4B_HUMAN	1	238.376	3.38376	Dengue	QC	NaN	NaN	NaN	149.387	0.121871
Dengue / QC	_YRGDQDATMSILDISMMTGFAPDTDDLK_	P01024	1.15123	1.15123	2.28713e-26	1.17588e-24	140	P01024	C3	Complement C3	CO3_HUMAN	1	122.103	2.22103	Dengue	QC	NaN	NaN	NaN	125.311	0.0875881
Dengue / QC	_VPTADLEDVLPLAEDITNILSK_	P02774;P02774-3	1.0168	1.0168	2.70369e-26	1.365e-24	176	P02774;P02774-3	GC	Vitamin D-binding protein;Isoform 3 of Vitamin D-binding protein	VTDB_HUMAN	1	102.343	2.02343	Dengue	QC	NaN	NaN	NaN	170.236	0.0857075
Dengue / QC	_VPLLLSEPINIIDALEMR_	P04114	0.832434	0.832434	2.77635e-26	1.38917e-24	164	P04114	APOB	Apolipoprotein B-100	APOB_HUMAN	1	78.0687	1.78069	Dengue	QC	NaN	NaN	NaN	140.901	0.0707124
Dengue / QC	_DC[Carbamidomethyl (C)]QDIANK_	P02679;P02679-2	5.79938	5.79938	7.36856e-26	3.62223e-24	42	P02679;P02679-2	FGG	Fibrinogen gamma chain;Isoform Gamma-A of Fibrinogen gamma chain	FIBG_HUMAN	1	5469.15	55.6915	Dengue	QC	NaN	NaN	NaN	33.9213	0.201596
Dengue / QC	_HQMDLVATLSQLGLQELFQAPDLR_	P08697	1.11512	1.11512	8.32242e-26	4.05555e-24	170	P08697	SERPINF2	Alpha-2-antiplasmin	A2AP_HUMAN	1	116.613	2.16613	Dengue	QC	NaN	NaN	NaN	156.513	0.087182
Dengue / QC	_QSM[Oxidation (M)]TLSSEVQIPDFDVDLGTILR_	P04114	1.68112	1.68112	1.95122e-25	8.7477e-24	108	P04114	APOB	Apolipoprotein B-100	APOB_HUMAN	1	220.676	3.20676	Dengue	QC	NaN	NaN	NaN	69.4713	0.0764462
Dengue / QC	_SLFTDLVAEKDLFHC[Carbamidomethyl (C)]VSFTLPR_	P20742	2.37271	2.37271	2.15692e-25	9.59314e-24	64	P20742	PZP	Pregnancy zone protein	PZP_HUMAN	1	417.911	5.17911	Dengue	QC	NaN	NaN	NaN	52.7111	0.117735
Dengue / QC	_VQLSNDFDEYIMAIEQTIK_	P01024	0.815867	0.815867	2.23702e-25	9.87109e-24	176	P01024	C3	Complement C3	CO3_HUMAN	1	76.0356	1.76036	Dengue	QC	NaN	NaN	NaN	112.838	0.0622963
Dengue / QC	_DC[Carbamidomethyl (C)]QDIANKGAK_	P02679;P02679-2	15.1103	15.1103	7.68488e-25	3.16662e-23	28	P02679;P02679-2	FGG	Fibrinogen gamma chain;Isoform Gamma-A of Fibrinogen gamma chain	FIBG_HUMAN	1	3.53706e+06	35371.6	Dengue	QC	NaN	NaN	NaN	22.3898	0.180072
Dengue / QC	_VADALTNAVAHVDDM[Oxidation (M)]PNALSALSDLHAHK_	P69905	1.27331	1.27331	1.2386e-24	4.99362e-23	76	P69905	HBA1	Hemoglobin subunit alpha	HBA_HUMAN	1	141.716	2.41716	Dengue	QC	NaN	NaN	NaN	60.6985	0.0587405
Dengue / QC	_MGPTVSPIC[Carbamidomethyl (C)]LPGTSSDYNLMDGDLGLISGWGR_	P09871	0.762827	0.762827	2.54279e-24	1.0035e-22	172	P09871	C1S	Complement C1s subcomponent	C1S_HUMAN	1	69.6812	1.69681	Dengue	QC	NaN	NaN	NaN	107.783	0.0654689
Dengue / QC	_LHLETDSLALVALGALDTALYAAGSK_	P0C0L5	1.01912	1.01912	2.84351e-24	1.1066e-22	174	P0C0L5	C4B	Complement C4-B	CO4B_HUMAN	1	102.668	2.02668	Dengue	QC	NaN	NaN	NaN	150.627	0.0896537
Dengue / QC	_ADSQAQLLLSTVVGVFTAPGLHLKQPFVQGLALYTPVVLPR_	P01019	0.919114	0.919114	2.91167e-24	1.12531e-22	154	P01019	AGT	Angiotensinogen	ANGT_HUMAN	1	89.0953	1.89095	Dengue	QC	NaN	NaN	NaN	143.034	0.0832046
Dengue / QC	_YIYPLDSLTWIEYWPR_	P01031	1.33872	1.33872	3.76912e-24	1.42717e-22	74	P01031	C5	Complement C5	CO5_HUMAN	1	152.927	2.52927	Dengue	QC	NaN	NaN	NaN	36.5891	0.0740078
Dengue / QC	_FFESFGDLSTPDAVMGNPK_	P68871	0.633533	0.633533	3.83538e-24	1.44252e-22	164	P68871	HBB	Hemoglobin subunit beta	HBB_HUMAN	1	55.1359	1.55136	Dengue	QC	NaN	NaN	NaN	140.008	0.0541335
Dengue / QC	_DGWHSWPIAHQWPQGPSAVDAAFSWEEK_	P02790	1.15051	1.15051	8.43583e-24	3.11016e-22	148	P02790	HPX	Hemopexin	HEMO_HUMAN	1	121.992	2.21992	Dengue	QC	NaN	NaN	NaN	127.937	0.0918836
Dengue / QC	_EPGQDLVVLPLSITTDFIPSFR_	P01024	0.918363	0.918363	1.59486e-23	5.60304e-22	176	P01024	C3	Complement C3	CO3_HUMAN	1	88.997	1.88997	Dengue	QC	NaN	NaN	NaN	135.663	0.0762198
Dengue / QC	_TLLLVGSPTWK_	P80108	1.16109	1.16109	2.27742e-23	7.82985e-22	86	P80108	GPLD1	Phosphatidylinositol-glycan-specific phospholipase D	PHLD_HUMAN	1	123.626	2.23626	Dengue	QC	NaN	NaN	NaN	74.0129	0.0907747
Dengue / QC	_YQEDTC[Carbamidomethyl (C)]YGDAGSAFAVHDLEEDTWYATGILSFDK_	P00738	1.42352	1.42352	3.47552e-23	1.16628e-21	154	P00738	HP	Haptoglobin	HPT_HUMAN	1	168.239	2.68239	Dengue	QC	NaN	NaN	NaN	100.927	0.105777
Dengue / QC	_FGGVLHLSDLDDDGLDEIIMAAPLR_	P80108	0.917923	0.917923	1.31012e-22	4.12468e-21	162	P80108	GPLD1	Phosphatidylinositol-glycan-specific phospholipase D	PHLD_HUMAN	1	88.9393	1.88939	Dengue	QC	NaN	NaN	NaN	137.62	0.0861148
Dengue / QC	_VLGAFSDGLAHLDNLK_	P68871	1.87288	1.87288	1.42795e-22	4.47052e-21	32	P68871	HBB	Hemoglobin subunit beta	HBB_HUMAN	1	266.263	3.66263	Dengue	QC	NaN	NaN	NaN	23.5145	0.0460608
Dengue / QC	_KAGTELVNFLSYFVELGTQPATQ_	P02652;V9GYM3	1.09884	1.09884	1.45297e-22	4.52359e-21	120	P02652;V9GYM3	APOA2	Apolipoprotein A-II	APOA2_HUMAN;V9GYM3_HUMAN	1	114.182	2.14182	Dengue	QC	NaN	NaN	NaN	92.0871	0.0974994
Dengue / QC	_LTVDKSRWQQGNVFSC[Carbamidomethyl (C)]SVM[Oxidation (M)]HEALHNHYTQK_	P01857	0.767466	0.767466	1.60318e-22	4.96367e-21	80	P01857	IGHG1	Immunoglobulin heavy constant gamma 1	IGHG1_HUMAN	1	70.2277	1.70228	Dengue	QC	NaN	NaN	NaN	41.4843	0.446391
Dengue / QC	_LRVDPVNFK_	P69905	1.92533	1.92533	1.7077e-22	5.2582e-21	38	P69905	HBA1	Hemoglobin subunit alpha	HBA_HUMAN	1	279.823	3.79823	Dengue	QC	NaN	NaN	NaN	25.8479	0.0641331
Dengue / QC	_VQLSNDFDEYIM[Oxidation (M)]AIEQTIK_	P01024	1.47253	1.47253	1.87525e-22	5.6805e-21	176	P01024	C3	Complement C3	CO3_HUMAN	1	177.508	2.77508	Dengue	QC	NaN	NaN	NaN	139.338	0.0860987
Dengue / QC	_NPDPVAAPWC[Carbamidomethyl (C)]YTTDPSVR_	P08519	1.34861	1.34861	3.07294e-22	8.92267e-21	40	P08519	LPA	Apolipoprotein(a)	APOA_HUMAN	1	154.666	2.54666	Dengue	QC	NaN	NaN	NaN	33.0826	0.104539
Dengue / QC	_LPEGSVSLIILLTDGDPTVGETNPR_	Q14624	1.12236	1.12236	3.39942e-22	9.81976e-21	104	Q14624	ITIH4	Inter-alpha-trypsin inhibitor heavy chain H4	ITIH4_HUMAN	1	117.703	2.17703	Dengue	QC	NaN	NaN	NaN	78.9908	0.0915872
Dengue / QC	_MDWLVPATC[Carbamidomethyl (C)]EPIQSVFFFSGDK_	P04004	1.26404	1.26404	3.71396e-22	1.06733e-20	90	P04004	VTN	Vitronectin	VTNC_HUMAN	1	140.168	2.40168	Dengue	QC	NaN	NaN	NaN	78.659	0.0987614
Dengue / QC	_EVALDLSQHK_	O00391	0.300616	0.300616	5.04472e-22	1.42781e-20	34	O00391	QSOX1	Sulfhydryl oxidase 1	QSOX1_HUMAN	1	23.167	1.23167	Dengue	QC	NaN	NaN	NaN	21.3525	0.17738
Dengue / QC	_NKADYVETVLDSTC[Carbamidomethyl (C)]SSTVQFLEYELNVLGTHK_	P04114	1.48856	1.48856	6.63973e-22	1.83296e-20	98	P04114	APOB	Apolipoprotein B-100	APOB_HUMAN	1	180.609	2.80609	Dengue	QC	NaN	NaN	NaN	91.1033	0.109243
Dengue / QC	_LLSHC[Carbamidomethyl (C)]LLVTLAAHLPAEFTPAVHASLDKFLASVSTVLTSKYR_	P69905	3.22538	3.22538	6.90945e-22	1.89807e-20	32	P69905	HBA1	Hemoglobin subunit alpha	HBA_HUMAN	1	835.271	9.35271	Dengue	QC	NaN	NaN	NaN	23.9073	0.0851483
Dengue / QC	_VETVDRFQILTLWLPDSLTTWEIHGLSLSK_	P0C0L5	2.65594	2.65594	7.00465e-22	1.91483e-20	62	P0C0L5	C4B	Complement C4-B	CO4B_HUMAN	1	530.256	6.30256	Dengue	QC	NaN	NaN	NaN	48.9216	0.138211
Dengue / QC	_DTWVEHWPEEDEC[Carbamidomethyl (C)]QDEENQKQC[Carbamidomethyl (C)]QDLGAFTESMVVFGC[Carbamidomethyl (C)]PN_	P01024	1.37468	1.37468	8.02632e-22	2.17292e-20	146	P01024	C3	Complement C3	CO3_HUMAN	1	159.31	2.5931	Dengue	QC	NaN	NaN	NaN	61.9168	0.103534
Dengue / QC	_REDFDVEAADSAGNC[Carbamidomethyl (C)]LDSLVFVAGDR_	P09871	1.17378	1.17378	8.97806e-22	2.4189e-20	90	P09871	C1S	Complement C1s subcomponent	C1S_HUMAN	1	125.602	2.25602	Dengue	QC	NaN	NaN	NaN	79.799	0.0981589
Dengue / QC	_EPC[Carbamidomethyl (C)]VESLVSQYFQTVTDYGKDLM[Oxidation (M)]EK_	P02652;V9GYM3	1.2806	1.2806	1.04432e-21	2.80016e-20	74	P02652;V9GYM3	APOA2	Apolipoprotein A-II	APOA2_HUMAN;V9GYM3_HUMAN	1	142.941	2.42941	Dengue	QC	NaN	NaN	NaN	61.9057	0.0842431
Dengue / QC	_MYYSAVEPTKDIFTGLIGPMK_	E9PFZ2	2.297	2.297	1.154e-21	3.07953e-20	148	E9PFZ2	CP	Ceruloplasmin	E9PFZ2_HUMAN	1	391.436	4.91436	Dengue	QC	NaN	NaN	NaN	105.938	0.121965
Dengue / QC	_TTENYPNAGLIMNYC[Carbamidomethyl (C)]R_	P08519	2.02147	2.02147	1.70388e-21	4.46193e-20	40	P08519	LPA	Apolipoprotein(a)	APOA_HUMAN	1	305.996	4.05996	Dengue	QC	NaN	NaN	NaN	34.2043	0.104263
Dengue / QC	_ATLDVDEAGTEAAAATSFAIK_	P29622	0.697074	0.697074	2.24587e-21	5.82679e-20	132	P29622	SERPINA4	Kallistatin	KAIN_HUMAN	1	62.1213	1.62121	Dengue	QC	NaN	NaN	NaN	109.999	0.0701696
Dengue / QC	_SSTSPTTNVLLSPLSVATALSALSLGAEQR_	P36955	0.686313	0.686313	2.47708e-21	6.33862e-20	174	P36955	SERPINF1	Pigment epithelium-derived factor	PEDF_HUMAN	1	60.9166	1.60917	Dengue	QC	NaN	NaN	NaN	142.878	0.108333
Dengue / QC	_KPLEKAVANFFSGSC[Carbamidomethyl (C)]APC[Carbamidomethyl (C)]ADGTDFPQLC[Carbamidomethyl (C)]QLC[Carbamidomethyl (C)]PGC[Carbamidomethyl (C)]GC[Carbamidomethyl (C)]STLNQYFGYSGAFK_	P02787	-1.04291	1.04291	2.86727e-21	7.17328e-20	50	P02787	TF	Serotransferrin	TRFE_HUMAN	1	-51.4652	0.485348	Dengue	QC	NaN	NaN	NaN	33.5203	0.188501
Dengue / QC	_MRKDDIMLDEGMLQSLMELPDQYNYGMYAK_	P07357	1.01302	1.01302	3.07016e-21	7.6129e-20	84	P07357	C8A	Complement component C8 alpha chain	CO8A_HUMAN	1	101.812	2.01812	Dengue	QC	NaN	NaN	NaN	53.8123	0.0764177
Dengue / QC	_SELTQQLNALFQDK_	P06727	1.25056	1.25056	3.15572e-21	7.75643e-20	56	P06727	APOA4	Apolipoprotein A-IV	APOA4_HUMAN	1	137.934	2.37934	Dengue	QC	NaN	NaN	NaN	47.7785	0.106305
Dengue / QC	_LWAYLTINQLLAER_	P19823	2.07427	2.07427	3.74161e-21	9.07706e-20	60	P19823	ITIH2	Inter-alpha-trypsin inhibitor heavy chain H2	ITIH2_HUMAN	1	321.132	4.21132	Dengue	QC	NaN	NaN	NaN	38.7266	0.177907
Dengue / QC	_LGEVNTYAGDLQK_	P06727	0.899491	0.899491	4.34749e-21	1.05014e-19	94	P06727	APOA4	Apolipoprotein A-IV	APOA4_HUMAN	1	86.5407	1.86541	Dengue	QC	NaN	NaN	NaN	78.6248	0.0770668
Dengue / QC	_MVC[Carbamidomethyl (C)]AGYK_	H0YAC1;P03952	1.32237	1.32237	5.83929e-21	1.40444e-19	94	H0YAC1;P03952	KLKB1	Plasma kallikrein (Fragment);Plasma kallikrein	H0YAC1_HUMAN;KLKB1_HUMAN	1	150.077	2.50077	Dengue	QC	NaN	NaN	NaN	82.0745	0.0922711
Dengue / QC	_QAQQMVQPQSPVAVSQSKPGC[Carbamidomethyl (C)]YDNGK_	P02751;P02751-15;P02751-3;P02751-7	0.311404	0.311404	6.01662e-21	1.43477e-19	150	P02751;P02751-15;P02751-3;P02751-7	FN1	Fibronectin;Isoform 15 of Fibronectin;Isoform 3 of Fibronectin;Isoform 7 of Fibronectin	FINC_HUMAN	1	24.0915	1.24091	Dengue	QC	NaN	NaN	NaN	58.7877	0.324228
Dengue / QC	_QSMTLSSEVQIPDFDVDLGTILR_	P04114	1.3675	1.3675	6.92407e-21	1.63036e-19	138	P04114	APOB	Apolipoprotein B-100	APOB_HUMAN	1	158.022	2.58022	Dengue	QC	NaN	NaN	NaN	71.1355	0.118817
Dengue / QC	_TSTADYAM[Oxidation (M)]FK_	P02679;P02679-2	4.26406	4.26406	8.08878e-21	1.88873e-19	36	P02679;P02679-2	FGG	Fibrinogen gamma chain;Isoform Gamma-A of Fibrinogen gamma chain	FIBG_HUMAN	1	1821.36	19.2136	Dengue	QC	NaN	NaN	NaN	27.2863	0.139347
Dengue / QC	_NNNEKDMALTAFVLISLQEAKDIC[Carbamidomethyl (C)]EEQVNSLPGSITK_	P01024	1.15475	1.15475	9.01322e-21	2.07009e-19	172	P01024	C3	Complement C3	CO3_HUMAN	1	122.645	2.22645	Dengue	QC	NaN	NaN	NaN	146.248	0.0945161
Dengue / QC	_LLIK[Methyl (KR)]YASQSISGVPSR_	A0A0A0MT36	1.65262	1.65262	1.14621e-20	2.57967e-19	76	A0A0A0MT36	IGKV6D-21	Immunoglobulin kappa variable 6D-21	KVD21_HUMAN	1	214.404	3.14404	Dengue	QC	NaN	NaN	NaN	55.9857	0.361463
Dengue / QC	_DFHINLFQVLPWLK_	B4E1Z4	0.853041	0.853041	1.20018e-20	2.69032e-19	176	B4E1Z4	NaN	cDNA FLJ55673, highly similar to Complement factor B (EC 3.4.21.47)	B4E1Z4_HUMAN	1	80.6304	1.8063	Dengue	QC	NaN	NaN	NaN	157.47	0.0841722
Dengue / QC	_MDWLVPATC[Carbamidomethyl (C)]EPIQSVFFFSGDKYYR_	P04004	1.17841	1.17841	1.37213e-20	3.0354e-19	98	P04004	VTN	Vitronectin	VTNC_HUMAN	1	126.328	2.26328	Dengue	QC	NaN	NaN	NaN	78.0447	0.0955543
Dengue / QC	_ADDKETC[Carbamidomethyl (C)]FAEEPTMR_	A0A0C4DGB6	1.57194	1.57194	1.38529e-20	3.04437e-19	70	A0A0C4DGB6	ALB	Serum albumin	A0A0C4DGB6_HUMAN	1	197.304	2.97304	Dengue	QC	NaN	NaN	NaN	54.785	0.101136
Dengue / QC	_QHLPLIK_	P02671	5.33237	5.33237	1.51442e-20	3.30226e-19	28	P02671	FGA	Fibrinogen alpha chain	FIBA_HUMAN	1	3929.05	40.2905	Dengue	QC	NaN	NaN	NaN	21.7028	0.12285
Dengue / QC	_LTIGEGQQHHLGGAK_	P02679;P02679-2	8.641	8.641	1.8274e-20	3.94866e-19	30	P02679;P02679-2	FGG	Fibrinogen gamma chain;Isoform Gamma-A of Fibrinogen gamma chain	FIBG_HUMAN	1	39821	399.21	Dengue	QC	NaN	NaN	NaN	22.9172	0.263754
Dengue / QC	_GAVYVYFGSK_	P80108	1.24797	1.24797	2.24301e-20	4.74333e-19	68	P80108	GPLD1	Phosphatidylinositol-glycan-specific phospholipase D	PHLD_HUMAN	1	137.507	2.37507	Dengue	QC	NaN	NaN	NaN	47.4827	0.113617
Dengue / QC	_GLPNVVTSAISLPNIR_	A0A0U1RR20;Q92954;Q92954-3;Q92954-6	1.43895	1.43895	5.62894e-20	1.14292e-18	70	A0A0U1RR20;Q92954;Q92954-3;Q92954-6	PRG4	Proteoglycan 4;Proteoglycan 4;Isoform C of Proteoglycan 4;Isoform F of Proteoglycan 4	A0A0U1RR20_HUMAN;PRG4_HUMAN;PRG4_HUMAN;PRG4_HUMAN	1	171.124	2.71124	Dengue	QC	NaN	NaN	NaN	53.6461	0.118433
Dengue / QC	_VGPEADKYR_	P02679;P02679-2	4.74542	4.74542	6.83715e-20	1.37825e-18	116	P02679;P02679-2	FGG	Fibrinogen gamma chain;Isoform Gamma-A of Fibrinogen gamma chain	FIBG_HUMAN	1	2582.33	26.8233	Dengue	QC	NaN	NaN	NaN	79.4068	0.363381
Dengue / QC	_QVLLVGAPTYDDVSK_	P80108	1.0608	1.0608	8.01597e-20	1.59296e-18	56	P80108	GPLD1	Phosphatidylinositol-glycan-specific phospholipase D	PHLD_HUMAN	1	108.609	2.08609	Dengue	QC	NaN	NaN	NaN	42.6672	0.0910982
Dengue / QC	_DYFPEPVTVSWNSGALTSGVHTFPAVLQSSGLYSLSSVVTVPSSSLGTK_	P01861	1.05066	1.05066	9.21324e-20	1.81161e-18	170	P01861	IGHG4	Immunoglobulin heavy constant gamma 4	IGHG4_HUMAN	1	107.147	2.07147	Dengue	QC	NaN	NaN	NaN	151.083	0.097952
Dengue / QC	_LHLETDSLALVALGALDTALYAAGSKSHKPLNMGK_	P0C0L5	1.6387	1.6387	1.16499e-19	2.2435e-18	54	P0C0L5	C4B	Complement C4-B	CO4B_HUMAN	1	211.386	3.11386	Dengue	QC	NaN	NaN	NaN	37.0838	0.195965
Dengue / QC	_AYIFIDEAHITQALIWLSQR_	P01023	0.932194	0.932194	1.31669e-19	2.49282e-18	94	P01023	A2M	Alpha-2-macroglobulin	A2MG_HUMAN	1	90.8176	1.90818	Dengue	QC	NaN	NaN	NaN	83.9029	0.0935399
Dengue / QC	_WC[Carbamidomethyl (C)]AVSEHEATKC[Carbamidomethyl (C)]QSFRDHMK_	P02787	9.03654	9.03654	1.36087e-19	2.56778e-18	26	P02787	TF	Serotransferrin	TRFE_HUMAN	1	52413.5	525.135	Dengue	QC	NaN	NaN	NaN	19.232	0.197227
Dengue / QC	_ALTDMPQM[Oxidation (M)]R_	P02671	3.37621	3.37621	1.58009e-19	2.9516e-18	32	P02671	FGA	Fibrinogen alpha chain	FIBA_HUMAN	1	938.345	10.3835	Dengue	QC	NaN	NaN	NaN	26.1204	0.129836
Dengue / QC	_AVLDVFEEGTEASAATAVKITLLSALVETR_	P01011	2.06927	2.06927	1.89802e-19	3.50764e-18	96	P01011	SERPINA3	Alpha-1-antichymotrypsin	AACT_HUMAN	1	319.673	4.19673	Dengue	QC	NaN	NaN	NaN	86.457	0.162353
Dengue / QC	_LVYHLGLPFSFLTFPYVEEAIK_	A0A182DWH7;P49908	0.921873	0.921873	1.91863e-19	3.52525e-18	86	A0A182DWH7;P49908	SELENOP	Selenoprotein P (Fragment);Selenoprotein P	A0A182DWH7_HUMAN;SEPP1_HUMAN	1	89.4574	1.89457	Dengue	QC	NaN	NaN	NaN	70.2694	0.0908483
Dengue / QC	_VVYRQYTDSTFRVPVER_	P00450	4.5744	4.5744	1.94349e-19	3.55926e-18	30	P00450	CP	Ceruloplasmin	CERU_HUMAN	1	2282.49	23.8249	Dengue	QC	NaN	NaN	NaN	22.2957	0.135368
Dengue / QC	_MYYSAVEPTK_	E9PFZ2	2.09414	2.09414	2.17466e-19	3.94395e-18	52	E9PFZ2	CP	Ceruloplasmin	E9PFZ2_HUMAN	1	326.971	4.26971	Dengue	QC	NaN	NaN	NaN	26.9762	0.100044
Dengue / QC	_ALEFLQLHNGR_	P80108	1.49032	1.49032	2.4698e-19	4.4504e-18	46	P80108	GPLD1	Phosphatidylinositol-glycan-specific phospholipase D	PHLD_HUMAN	1	180.952	2.80952	Dengue	QC	NaN	NaN	NaN	37.0172	0.0975965
Dengue / QC	_LREQLGPVTQEFWDNLEK_	P02647	1.53463	1.53463	2.86581e-19	5.08228e-18	62	P02647	APOA1	Apolipoprotein A-I	APOA1_HUMAN	1	189.715	2.89715	Dengue	QC	NaN	NaN	NaN	43.4568	0.0880281
Dengue / QC	_VPLLLSEPINIIDALEM[Oxidation (M)]R_	P04114	0.870414	0.870414	3.09696e-19	5.47488e-18	90	P04114	APOB	Apolipoprotein B-100	APOB_HUMAN	1	82.8188	1.82819	Dengue	QC	NaN	NaN	NaN	67.8713	0.0935172
Dengue / QC	_WVQTLSEQVQEELLSSQVTQELR_	P02649	1.40132	1.40132	3.7081e-19	6.47357e-18	58	P02649	APOE	Apolipoprotein E	APOE_HUMAN	1	164.143	2.64143	Dengue	QC	NaN	NaN	NaN	47.7368	0.114856
Dengue / QC	_VWPQQPSGELFEIEIDTLETTC[Carbamidomethyl (C)]HVLDPTPVAR_	P02765	0.96679	0.96679	3.70544e-19	6.47357e-18	122	P02765	AHSG	Alpha-2-HS-glycoprotein	FETUA_HUMAN	1	95.4487	1.95449	Dengue	QC	NaN	NaN	NaN	111.507	0.0860733
Dengue / QC	_SYSC[Carbamidomethyl (C)]QVM[Oxidation (M)]HEGSTVEK_	P15814	1.00263	1.00263	4.12703e-19	7.16034e-18	148	P15814	IGLL1	Immunoglobulin lambda-like polypeptide 1	IGLL1_HUMAN	1	100.366	2.00366	Dengue	QC	NaN	NaN	NaN	68.5687	0.27037
Dengue / QC	_SDLGAVISLLLWGR_	P00739	0.902469	0.902469	4.62672e-19	7.95341e-18	124	P00739	HPR	Haptoglobin-related protein	HPTR_HUMAN	1	86.9262	1.86926	Dengue	QC	NaN	NaN	NaN	68.0406	0.110979
Dengue / QC	_QLEQVIAK_	P02671	4.30709	4.30709	4.8255e-19	8.26975e-18	76	P02671	FGA	Fibrinogen alpha chain	FIBA_HUMAN	1	1879.53	19.7953	Dengue	QC	NaN	NaN	NaN	53.0277	0.293081
Dengue / QC	_FGSSLITVR_	P80108	0.598133	0.598133	5.55678e-19	9.43642e-18	164	P80108	GPLD1	Phosphatidylinositol-glycan-specific phospholipase D	PHLD_HUMAN	1	51.3757	1.51376	Dengue	QC	NaN	NaN	NaN	120.704	0.0561557
Dengue / QC	_SFEGLGQLEVLTLDHNQLQEVK_	P35858;P35858-2	1.19847	1.19847	6.0137e-19	1.01204e-17	66	P35858;P35858-2	IGFALS	Insulin-like growth factor-binding protein complex acid labile subunit;Isoform 2 of Insulin-like growth factor-binding protein complex acid labile subunit	ALS_HUMAN	1	129.497	2.29497	Dengue	QC	NaN	NaN	NaN	57.8442	0.0822647
Dengue / QC	_HYLM[Oxidation (M)]WGLSSDFWGEKPNLSYIIGK_	P01024	1.14345	1.14345	6.43119e-19	1.07288e-17	98	P01024	C3	Complement C3	CO3_HUMAN	1	120.909	2.20909	Dengue	QC	NaN	NaN	NaN	72.7237	0.0984049
Dengue / QC	_ILLMDLNEEDPTVLELGITGSK_	P27169	0.84641	0.84641	6.53977e-19	1.0875e-17	176	P27169	PON1	Serum paraoxonase/arylesterase 1	PON1_HUMAN	1	79.8021	1.79802	Dengue	QC	NaN	NaN	NaN	110.41	0.07243
Dengue / QC	_NTEQEEGGEAVHEVEVVIK_	P00742	1.03882	1.03882	7.54685e-19	1.24757e-17	90	P00742	F10	Coagulation factor X	FA10_HUMAN	1	105.454	2.05454	Dengue	QC	NaN	NaN	NaN	82.3742	0.0866718
Dengue / QC	_HLIVTPSGC[Carbamidomethyl (C)]GEQNMIGMTPTVIAVHYLDETEQWEKFGLEK_	P01024	0.853828	0.853828	7.93983e-19	1.30867e-17	122	P01024	C3	Complement C3	CO3_HUMAN	1	80.7289	1.80729	Dengue	QC	NaN	NaN	NaN	95.104	0.0986686
Dengue / QC	_AAPSVTLFPPSSEELQANK[Dimethyl (KR)]ATLVC[Carbamidomethyl (C)]LISDFYPGAVTVAWK_	P0DOY2	1.87036	1.87036	1.27403e-18	2.07548e-17	164	P0DOY2	IGLC2	Immunoglobulin lambda constant 2	IGLC2_HUMAN	1	265.624	3.65624	Dengue	QC	NaN	NaN	NaN	137.534	0.187567
Dengue / QC	_SLGNVIMVC[Carbamidomethyl (C)]R_	P08603	0.810758	0.810758	1.43878e-18	2.33032e-17	136	P08603	CFH	Complement factor H	CFAH_HUMAN	1	75.4133	1.75413	Dengue	QC	NaN	NaN	NaN	116.441	0.0756303
Dengue / QC	_IFFPGVSEFGK_	F8WF14;P06276	1.18095	1.18095	2.21421e-18	3.51514e-17	54	F8WF14;P06276	BCHE	Carboxylic ester hydrolase;Cholinesterase	F8WF14_HUMAN;CHLE_HUMAN	1	126.726	2.26726	Dengue	QC	NaN	NaN	NaN	40.4111	0.0951283
Dengue / QC	_HDTSLKPISVSYNPATAK_	P00915	1.18804	1.18804	2.25545e-18	3.56044e-17	54	P00915	CA1	Carbonic anhydrase 1	CAH1_HUMAN	1	127.842	2.27842	Dengue	QC	NaN	NaN	NaN	43.263	0.0740149
Dengue / QC	_TVMVNIENPEGIPVKQDSLSSQNQLGVLPLSWDIPELVNM[Oxidation (M)]GQWK_	P01024	0.823145	0.823145	2.48555e-18	3.87995e-17	140	P01024	C3	Complement C3	CO3_HUMAN	1	76.9259	1.76926	Dengue	QC	NaN	NaN	NaN	77.0216	0.0844628
Dengue / QC	_DQYKVGEVLK_	P08603	1.13259	1.13259	2.70786e-18	4.1804e-17	120	P08603	CFH	Complement factor H	CFAH_HUMAN	1	119.252	2.19252	Dengue	QC	NaN	NaN	NaN	112.494	0.102764
Dengue / QC	_EYLIM[Oxidation (M)]GLDGATYDLEGHPQYLLDSNSWIEEMPSER_	P0C0L5	1.44356	1.44356	3.27808e-18	5.00555e-17	140	P0C0L5	C4B	Complement C4-B	CO4B_HUMAN	1	171.991	2.71991	Dengue	QC	NaN	NaN	NaN	77.1199	0.142674
Dengue / QC	_DLLAGLPAPGVEVYC[Carbamidomethyl (C)]LYGVGLPTPR_	P04180	0.866793	0.866793	3.37062e-18	5.13287e-17	86	P04180	LCAT	Phosphatidylcholine-sterol acyltransferase	LCAT_HUMAN	1	82.3605	1.8236	Dengue	QC	NaN	NaN	NaN	50.332	0.0771397
Dengue / QC	_LGREGVQKEDIPPADLSDQVPDTESETR_	P01024	2.82618	2.82618	5.26329e-18	7.80304e-17	76	P01024	C3	Complement C3	CO3_HUMAN	1	609.196	7.09196	Dengue	QC	NaN	NaN	NaN	51.7802	0.216437
Dengue / QC	_ATLVC[Carbamidomethyl (C)]LISDFYPGAVTVAWK_	P0DOY2	1.1008	1.1008	5.75842e-18	8.49215e-17	176	P0DOY2	IGLC2	Immunoglobulin lambda constant 2	IGLC2_HUMAN	1	114.474	2.14474	Dengue	QC	NaN	NaN	NaN	111.132	0.0959442
Dengue / QC	_HK[Dimethyl (KR)]VYAC[Carbamidomethyl (C)]EVTHQGLSSPVTK_	P01834	1.30702	1.30702	7.08487e-18	1.03395e-16	154	P01834	IGKC	Immunoglobulin kappa constant	IGKC_HUMAN	1	147.429	2.47429	Dengue	QC	NaN	NaN	NaN	65.9715	0.573504
Dengue / QC	_VETNM[Oxidation (M)]AFSPFSIASLLTQVLLGAGENTK_	P05155;P05155-3	0.547824	0.547824	7.26321e-18	1.05722e-16	76	P05155;P05155-3	SERPING1	Plasma protease C1 inhibitor;Isoform 3 of Plasma protease C1 inhibitor	IC1_HUMAN	1	46.1879	1.46188	Dengue	QC	NaN	NaN	NaN	39.0797	0.228649
Dengue / QC	_SGQAPVLVIYEDSK[Methyl (KR)]_	A0A075B6K4	0.868428	0.868428	7.49518e-18	1.08816e-16	64	A0A075B6K4	IGLV3-10	Immunoglobulin lambda variable 3-10	LV310_HUMAN	1	82.5673	1.82567	Dengue	QC	NaN	NaN	NaN	55.4334	0.0982955
Dengue / QC	_SSTSPTTNVLLSPLSVATALSALSLGAEQRTESIIHR_	P36955	2.14786	2.14786	1.0187e-17	1.46756e-16	62	P36955	SERPINF1	Pigment epithelium-derived factor	PEDF_HUMAN	1	343.171	4.43171	Dengue	QC	NaN	NaN	NaN	36.7847	0.177029
Dengue / QC	_AALTELSLGSAYQAMILGVDSK_	P04114	1.15005	1.15005	1.15649e-17	1.64075e-16	40	P04114	APOB	Apolipoprotein B-100	APOB_HUMAN	1	121.922	2.21922	Dengue	QC	NaN	NaN	NaN	24.4847	0.126605
Dengue / QC	_LREQLGPVTQEFWDNLEKETEGLR_	P02647	1.7688	1.7688	1.20709e-17	1.70821e-16	38	P02647	APOA1	Apolipoprotein A-I	APOA1_HUMAN	1	240.77	3.4077	Dengue	QC	NaN	NaN	NaN	32.0161	0.107871
Dengue / QC	_GEWTC[Carbamidomethyl (C)]KPIAEK_	P02751;P02751-15;P02751-3;P02751-7	0.630663	0.630663	1.2235e-17	1.72708e-16	118	P02751;P02751-15;P02751-3;P02751-7	FN1	Fibronectin;Isoform 15 of Fibronectin;Isoform 3 of Fibronectin;Isoform 7 of Fibronectin	FINC_HUMAN	1	54.8277	1.54828	Dengue	QC	NaN	NaN	NaN	112.244	0.0859222
Dengue / QC	_GLRQGYFVEAQPK_	P02743	4.10456	4.10456	1.23222e-17	1.73502e-16	30	P02743	APCS	Serum amyloid P-component	SAMP_HUMAN	1	1620.27	17.2027	Dengue	QC	NaN	NaN	NaN	24.1039	0.187605
Dengue / QC	_NPSDPMPQAPALWIETTAYALLHLLLHEGK_	P0C0L5	1.64975	1.64975	1.29121e-17	1.81352e-16	32	P0C0L5	C4B	Complement C4-B	CO4B_HUMAN	1	213.78	3.1378	Dengue	QC	NaN	NaN	NaN	27.6067	0.12397
Dengue / QC	_AVHKAVLTIDEK_	P01009	2.97089	2.97089	1.3713e-17	1.91163e-16	46	P01009	SERPINA1	Alpha-1-antitrypsin	A1AT_HUMAN	1	684.018	7.84018	Dengue	QC	NaN	NaN	NaN	40.1266	0.211323
Dengue / QC	_KMTVTDQVNC[Carbamidomethyl (C)]PKLS_	P05090	3.01517	3.01517	1.67814e-17	2.30497e-16	34	P05090	APOD	Apolipoprotein D	APOD_HUMAN	1	708.454	8.08454	Dengue	QC	NaN	NaN	NaN	24.0719	0.136402
Dengue / QC	_APVGHFYEPQAPSAEVEMTSYVLLAYLTAQPAPTSEDLTSATNIVK_	P01023	0.990821	0.990821	1.69353e-17	2.32042e-16	140	P01023	A2M	Alpha-2-macroglobulin	A2MG_HUMAN	1	98.7316	1.98732	Dengue	QC	NaN	NaN	NaN	123.182	0.103955
Dengue / QC	_QFTSSTSYNRGDSTFESKSYK_	P02671	3.43081	3.43081	2.30561e-17	3.11341e-16	32	P02671	FGA	Fibrinogen alpha chain	FIBA_HUMAN	1	978.394	10.7839	Dengue	QC	NaN	NaN	NaN	22.7635	0.135867
Dengue / QC	_TPENYPNAGLTENYC[Carbamidomethyl (C)]R_	P08519	1.99027	1.99027	2.57702e-17	3.45494e-16	42	P08519	LPA	Apolipoprotein(a)	APOA_HUMAN	1	297.31	3.9731	Dengue	QC	NaN	NaN	NaN	32.9249	0.156581
Dengue / QC	_GEC[Carbamidomethyl (C)]QAEGVLFFQGDR_	P02790	0.924577	0.924577	3.14939e-17	4.20218e-16	90	P02790	HPX	Hemopexin	HEMO_HUMAN	1	89.8128	1.89813	Dengue	QC	NaN	NaN	NaN	75.79	0.0924807
Dengue / QC	_VFKDVFLEMNIPYSVVR_	P01031	0.792051	0.792051	3.70265e-17	4.88228e-16	102	P01031	C5	Complement C5	CO5_HUMAN	1	73.1534	1.73153	Dengue	QC	NaN	NaN	NaN	76.3761	0.0919689
Dengue / QC	_ATNYNAGDR_	P61626	1.428	1.428	3.71478e-17	4.88676e-16	108	P61626	LYZ	Lysozyme C	LYSC_HUMAN	1	169.074	2.69074	Dengue	QC	NaN	NaN	NaN	95.438	0.141149
Dengue / QC	_SLDFTELDVAAEKIDRFMQAVTGWK_	P01019	1.76403	1.76403	3.90914e-17	5.11842e-16	78	P01019	AGT	Angiotensinogen	ANGT_HUMAN	1	239.646	3.39646	Dengue	QC	NaN	NaN	NaN	70.3092	0.141736
Dengue / QC	_EVDLKDYEDQQK_	P02671	3.45742	3.45742	4.02731e-17	5.26085e-16	86	P02671	FGA	Fibrinogen alpha chain	FIBA_HUMAN	1	998.466	10.9847	Dengue	QC	NaN	NaN	NaN	62.1731	0.273266
Dengue / QC	_IDTINLFPATLFDAYMVAQNPGEWMLSC[Carbamidomethyl (C)]QNLNHLK_	P00450	0.844879	0.844879	4.50026e-17	5.82436e-16	98	P00450	CP	Ceruloplasmin	CERU_HUMAN	1	79.6114	1.79611	Dengue	QC	NaN	NaN	NaN	84.1208	0.10425
Dengue / QC	_LLIYDASNR[Methyl (KR)]_	P04433	1.46399	1.46399	5.18051e-17	6.62821e-16	110	P04433	IGKV3-11	Immunoglobulin kappa variable 3-11	KV311_HUMAN	1	175.871	2.75871	Dengue	QC	NaN	NaN	NaN	91.8431	0.140672
Dengue / QC	_WNPSPPAC[Carbamidomethyl (C)]EPNSC[Carbamidomethyl (C)]INLPDIPHASWETYPRPTKEDVYVVGTVLR_	P04003	1.37803	1.37803	5.26439e-17	6.72019e-16	68	P04003	C4BPA	C4b-binding protein alpha chain	C4BPA_HUMAN	1	159.914	2.59914	Dengue	QC	NaN	NaN	NaN	59.9128	0.104487
Dengue / QC	_FRIEDGFSLKEQLQDMGLVDLFSPEK_	P01008	1.52024	1.52024	5.31634e-17	6.75572e-16	126	P01008	SERPINC1	Antithrombin-III	ANT3_HUMAN	1	186.839	2.86839	Dengue	QC	NaN	NaN	NaN	89.7804	0.14935
Dengue / QC	_RC[Carbamidomethyl (C)]C[Carbamidomethyl (C)]QDGVTRLPMMR_	P0C0L5	2.81662	2.81662	5.54837e-17	7.03464e-16	82	P0C0L5	C4B	Complement C4-B	CO4B_HUMAN	1	604.509	7.04509	Dengue	QC	NaN	NaN	NaN	69.0259	0.214481
Dengue / QC	_EGKEYGVVLAPDGSTVAVEPLLAGLEAGLQGR_	Q96PD5	0.920918	0.920918	6.19825e-17	7.77069e-16	174	Q96PD5	PGLYRP2	N-acetylmuramoyl-L-alanine amidase	PGRP2_HUMAN	1	89.332	1.89332	Dengue	QC	NaN	NaN	NaN	165.501	0.0933397
Dengue / QC	_LLNNWDVC[Carbamidomethyl (C)]ADMVGTFTDTEDPAKFK_	P02753;Q5VY30	0.923491	0.923491	7.21871e-17	8.9897e-16	126	P02753;Q5VY30	RBP4	Retinol-binding protein 4;Retinol binding protein 4, plasma, isoform CRA_b	RET4_HUMAN;Q5VY30_HUMAN	1	89.6699	1.8967	Dengue	QC	NaN	NaN	NaN	110.405	0.0930415
Dengue / QC	_ITC[Carbamidomethyl (C)]SGDVLAK[Methyl (KR)]_	P01718	1.39766	1.39766	7.53412e-17	9.36169e-16	86	P01718	IGLV3-27	Immunoglobulin lambda variable 3-27	LV327_HUMAN	1	163.474	2.63474	Dengue	QC	NaN	NaN	NaN	76.9565	0.147382
Dengue / QC	_DC[Carbamidomethyl (C)]SLPYATESKEC[Carbamidomethyl (C)]R_	P23142	2.92999	2.92999	8.20676e-17	1.01525e-15	78	P23142	FBLN1	Fibulin-1	FBLN1_HUMAN	1	662.104	7.62104	Dengue	QC	NaN	NaN	NaN	61.847	0.230549
Dengue / QC	_KGGETSEM[Oxidation (M)]YLIQPDSSVKPYR_	P02675	2.7403	2.7403	8.41215e-17	1.03836e-15	38	P02675	FGB	Fibrinogen beta chain	FIBB_HUMAN	1	568.209	6.68209	Dengue	QC	NaN	NaN	NaN	29.306	0.152274
Dengue / QC	_AVPPNNSNAAEDDLPTVELQGVVPR_	P00488	1.09051	1.09051	9.25472e-17	1.13698e-15	72	P00488	F13A1	Coagulation factor XIII A chain	F13A_HUMAN	1	112.949	2.12949	Dengue	QC	NaN	NaN	NaN	48.199	0.119885
Dengue / QC	_YTIAALLSPYSYSTTAVVTNPK_	P02766	1.31151	1.31151	1.10482e-16	1.34596e-15	48	P02766	TTR	Transthyretin	TTHY_HUMAN	1	148.201	2.48201	Dengue	QC	NaN	NaN	NaN	31.8735	0.0736218
Dengue / QC	_A[Acetyl (Protein N-term)]SPDWGYDDKNGPEQWSK_	P00915	2.19553	2.19553	1.27027e-16	1.5276e-15	64	P00915	CA1	Carbonic anhydrase 1	CAH1_HUMAN	1	358.059	4.58059	Dengue	QC	NaN	NaN	NaN	53.7336	0.187333
Dengue / QC	_SGLSTGWTQLSKLLELTGPKSLPAPWLSMAPVSWITPGLK_	P04217	0.787715	0.787715	1.31054e-16	1.57265e-15	154	P04217	A1BG	Alpha-1B-glycoprotein	A1BG_HUMAN	1	72.6338	1.72634	Dengue	QC	NaN	NaN	NaN	137.24	0.131939
Dengue / QC	_EVYM[Oxidation (M)]PSSIFQDDFVIPDISEPGTWK_	P0C0L5	1.3383	1.3383	1.32247e-16	1.58357e-15	170	P0C0L5	C4B	Complement C4-B	CO4B_HUMAN	1	152.853	2.52853	Dengue	QC	NaN	NaN	NaN	148.33	0.108483
Dengue / QC	_TAVNALWGK_	P02042	0.578996	0.578996	1.35278e-16	1.61297e-15	102	P02042	HBD	Hemoglobin subunit delta	HBD_HUMAN	1	49.3809	1.49381	Dengue	QC	NaN	NaN	NaN	82.4911	0.0552604
Dengue / QC	_LFLEPTRKDIALLK_	P00747	3.75042	3.75042	1.5744e-16	1.86138e-15	60	P00747	PLG	Plasminogen	PLMN_HUMAN	1	1245.83	13.4583	Dengue	QC	NaN	NaN	NaN	40.6782	0.230451
Dengue / QC	_KEGGLGPLNIPLLADVTR_	P32119	1.0708	1.0708	1.61592e-16	1.90644e-15	56	P32119	PRDX2	Peroxiredoxin-2	PRDX2_HUMAN	1	110.059	2.10059	Dengue	QC	NaN	NaN	NaN	46.1371	0.0828981
Dengue / QC	_SPAGPTVVSIGGGK_	P09172	1.73983	1.73983	1.66961e-16	1.96153e-15	44	P09172	DBH	Dopamine beta-hydroxylase	DOPO_HUMAN	1	233.996	3.33996	Dengue	QC	NaN	NaN	NaN	35.229	0.105153
Dengue / QC	_QLVHHFEIDVDIFEPQGISK_	P19827	1.10297	1.10297	1.7355e-16	2.03042e-15	162	P19827	ITIH1	Inter-alpha-trypsin inhibitor heavy chain H1	ITIH1_HUMAN	1	114.797	2.14797	Dengue	QC	NaN	NaN	NaN	118.543	0.0934926
Dengue / QC	_NIPTVNENLENYYLEVNQLEK_	P51884	0.928071	0.928071	1.90403e-16	2.21373e-15	110	P51884	LUM	Lumican	LUM_HUMAN	1	90.273	1.90273	Dengue	QC	NaN	NaN	NaN	100.058	0.10027
Dengue / QC	_SDFASNC[Carbamidomethyl (C)]C[Carbamidomethyl (C)]SINSPPLYC[Carbamidomethyl (C)]DSEIDAELKNIL_	P02774;P02774-3	0.99272	0.99272	2.01179e-16	2.33418e-15	140	P02774;P02774-3	GC	Vitamin D-binding protein;Isoform 3 of Vitamin D-binding protein	VTDB_HUMAN	1	98.9934	1.98993	Dengue	QC	NaN	NaN	NaN	121.85	0.114206
Dengue / QC	_KQC[Carbamidomethyl (C)]SKEDGGGWWYNR_	P02675	2.38181	2.38181	2.11064e-16	2.43877e-15	32	P02675	FGB	Fibrinogen beta chain	FIBB_HUMAN	1	421.188	5.21188	Dengue	QC	NaN	NaN	NaN	25.9554	0.1158
Dengue / QC	_TILDDLRAEDHFSVIDFNQNIR_	P19823	0.900171	0.900171	2.22392e-16	2.56437e-15	124	P19823	ITIH2	Inter-alpha-trypsin inhibitor heavy chain H2	ITIH2_HUMAN	1	86.6287	1.86629	Dengue	QC	NaN	NaN	NaN	104.752	0.0955644
Dengue / QC	_SPLFMGKVVNPTQK_	P01009	2.5443	2.5443	2.23474e-16	2.57156e-15	52	P01009	SERPINA1	Alpha-1-antitrypsin	A1AT_HUMAN	1	483.325	5.83325	Dengue	QC	NaN	NaN	NaN	44.0209	0.165421
Dengue / QC	_LWAYLTIQELLAKR_	P19827	0.699777	0.699777	2.35498e-16	2.69333e-15	102	P19827	ITIH1	Inter-alpha-trypsin inhibitor heavy chain H1	ITIH1_HUMAN	1	62.4254	1.62425	Dengue	QC	NaN	NaN	NaN	72.838	0.123895
Dengue / QC	_ELISLVEDVSSNYDGC[Carbamidomethyl (C)]C[Carbamidomethyl (C)]EGDVVQC[Carbamidomethyl (C)]IR_	P43652	1.34708	1.34708	2.4278e-16	2.77095e-15	62	P43652	AFM	Afamin	AFAM_HUMAN	1	154.396	2.54396	Dengue	QC	NaN	NaN	NaN	51.4287	0.11046
Dengue / QC	_VSWIRQPPGKALEWLAR_	A0A0C4DH43	1.59204	1.59204	2.67028e-16	3.0292e-15	44	A0A0C4DH43	IGHV2-70D	Immunoglobulin heavy variable 2-70D	HV70D_HUMAN	1	201.475	3.01475	Dengue	QC	NaN	NaN	NaN	31.5548	0.117948
Dengue / QC	_TAMDVFVC[Carbamidomethyl (C)]TYFM[Oxidation (M)]PAAQLPELPDVELPTNKDVC[Carbamidomethyl (C)]DPGNTK_	P02774;P02774-3	1.21419	1.21419	2.72392e-16	3.0838e-15	124	P02774;P02774-3	GC	Vitamin D-binding protein;Isoform 3 of Vitamin D-binding protein	VTDB_HUMAN	1	132.011	2.32011	Dengue	QC	NaN	NaN	NaN	71.3774	0.160715
Dengue / QC	_LRLEPGKEYLIMGLDGATYDLEGHPQYLLDSNSWIEEMPSER_	P0C0L5	1.1253	1.1253	3.06107e-16	3.45156e-15	156	P0C0L5	C4B	Complement C4-B	CO4B_HUMAN	1	118.147	2.18147	Dengue	QC	NaN	NaN	NaN	109.473	0.133785
Dengue / QC	_STAAMSTYTGIFTDQVLSVLKGEE_	A0A024R0T9;K7ER74;P02655	0.792371	0.792371	3.89733e-16	4.34208e-15	130	A0A024R0T9;K7ER74;P02655	APOC4-APOC2;APOC4-APOC2;APOC2	Apolipoprotein C-II isoform 1;APOC4-APOC2 readthrough (NMD candidate);Apolipoprotein C-II	A0A024R0T9_HUMAN;K7ER74_HUMAN;APOC2_HUMAN	1	73.1919	1.73192	Dengue	QC	NaN	NaN	NaN	94.9497	0.0775915
Dengue / QC	_ALTDM[Oxidation (M)]PQMR_	P02671	2.9612	2.9612	3.92225e-16	4.36116e-15	38	P02671	FGA	Fibrinogen alpha chain	FIBA_HUMAN	1	678.772	7.78772	Dengue	QC	NaN	NaN	NaN	29.5887	0.167896
Dengue / QC	_EYGVVLAPDGSTVAVEPLLAGLEAGLQGR_	Q96PD5	0.743	0.743	4.00821e-16	4.44792e-15	172	Q96PD5	PGLYRP2	N-acetylmuramoyl-L-alanine amidase	PGRP2_HUMAN	1	67.3653	1.67365	Dengue	QC	NaN	NaN	NaN	109.377	0.0677009
Dengue / QC	_GLQDEDGYRMK_	P0C0L5	4.0952	4.0952	4.25525e-16	4.71273e-15	58	P0C0L5	C4B	Complement C4-B	CO4B_HUMAN	1	1609.14	17.0914	Dengue	QC	NaN	NaN	NaN	36.139	0.321746
Dengue / QC	_VPAPPSPQPATYTC[Carbamidomethyl (C)]VVSHEDSR_	A0A0A0MS09;P01880;P01880-2	1.46712	1.46712	4.61467e-16	5.0707e-15	64	A0A0A0MS09;P01880;P01880-2	IGHD	Immunoglobulin heavy constant delta (Fragment);Immunoglobulin heavy constant delta;Isoform 2 of Immunoglobulin heavy constant delta	A0A0A0MS09_HUMAN;IGHD_HUMAN;IGHD_HUMAN	1	176.469	2.76469	Dengue	QC	NaN	NaN	NaN	50.5525	0.1211
Dengue / QC	_TVAAC[Carbamidomethyl (C)]NLPIVRGPC[Carbamidomethyl (C)]R_	P02760	3.61598	3.61598	4.93306e-16	5.39938e-15	26	P02760	AMBP	Protein AMBP	AMBP_HUMAN	1	1126.08	12.2608	Dengue	QC	NaN	NaN	NaN	16.6397	0.112646
Dengue / QC	_HGTDDGVVWM[Oxidation (M)]NWK_	P02675	3.21299	3.21299	5.3975e-16	5.88475e-15	32	P02675	FGB	Fibrinogen beta chain	FIBB_HUMAN	1	827.272	9.27272	Dengue	QC	NaN	NaN	NaN	26.3167	0.173828
Dengue / QC	_EYVLPSFEVIVEPTEKFYYIYNEK_	P01024	1.1075	1.1075	6.24877e-16	6.73426e-15	140	P01024	C3	Complement C3	CO3_HUMAN	1	115.472	2.15472	Dengue	QC	NaN	NaN	NaN	90.3402	0.107466
Dengue / QC	_TVMVNIENPEGIPVKQDSLSSQNQLGVLPLSWDIPELVNMGQWK_	P01024	1.05714	1.05714	6.45527e-16	6.94344e-15	172	P01024	C3	Complement C3	CO3_HUMAN	1	108.08	2.0808	Dengue	QC	NaN	NaN	NaN	91.7401	0.110013
Dengue / QC	_NPSSAGSWNSGSSGPGSTGNR_	P02671	2.19233	2.19233	6.70568e-16	7.18444e-15	66	P02671	FGA	Fibrinogen alpha chain	FIBA_HUMAN	1	357.044	4.57044	Dengue	QC	NaN	NaN	NaN	59.9247	0.199529
Dengue / QC	_QYTDSTFRVPVERK_	P00450	1.91585	1.91585	6.84477e-16	7.3063e-15	36	P00450	CP	Ceruloplasmin	CERU_HUMAN	1	277.337	3.77337	Dengue	QC	NaN	NaN	NaN	26.9272	0.185799
Dengue / QC	_KLVPFATELHER_	P06727	0.90925	0.90925	6.91854e-16	7.37101e-15	108	P06727	APOA4	Apolipoprotein A-IV	APOA4_HUMAN	1	87.8069	1.87807	Dengue	QC	NaN	NaN	NaN	102.676	0.0878408
Dengue / QC	_NPDPWAKNLNEKDYELLC[Carbamidomethyl (C)]LDGTR_	P02787	0.836118	0.836118	7.17787e-16	7.63279e-15	36	P02787	TF	Serotransferrin	TRFE_HUMAN	1	78.524	1.78524	Dengue	QC	NaN	NaN	NaN	21.4835	0.360536
Dengue / QC	_SLEYLDLSFNQIAR_	P51884	0.961651	0.961651	7.44265e-16	7.89935e-15	132	P51884	LUM	Lumican	LUM_HUMAN	1	94.7537	1.94754	Dengue	QC	NaN	NaN	NaN	107.115	0.130382
Dengue / QC	_SVAVYGQYGGQPC[Carbamidomethyl (C)]VGNAFETQSC[Carbamidomethyl (C)]EPTRGC[Carbamidomethyl (C)]PTEEGC[Carbamidomethyl (C)]GER_	P10643	2.44112	2.44112	7.95065e-16	8.40668e-15	44	P10643	C7	Complement component C7	CO7_HUMAN	1	443.061	5.43061	Dengue	QC	NaN	NaN	NaN	35.8111	0.180028
Dengue / QC	_SMQGGLVGNDETVALTAFVTIALHHGLAVFQDEGAEPLK_	P0C0L5	1.5367	1.5367	8.45972e-16	8.89461e-15	60	P0C0L5	C4B	Complement C4-B	CO4B_HUMAN	1	190.129	2.90129	Dengue	QC	NaN	NaN	NaN	54.6808	0.138147
Dengue / QC	_LK[Dimethyl (KR)]EC[Carbamidomethyl (C)]C[Carbamidomethyl (C)]EKPLLEK_	P02768	1.83517	1.83517	9.24055e-16	9.67926e-15	120	P02768	ALB	Serum albumin	ALBU_HUMAN	1	256.814	3.56814	Dengue	QC	NaN	NaN	NaN	69.3253	0.621242
Dengue / QC	_QSGLYFIKPLK_	P02679;P02679-2	3.37299	3.37299	1.11301e-15	1.15293e-14	86	P02679;P02679-2	FGG	Fibrinogen gamma chain;Isoform Gamma-A of Fibrinogen gamma chain	FIBG_HUMAN	1	936.031	10.3603	Dengue	QC	NaN	NaN	NaN	56.1841	0.296743
Dengue / QC	_WQQGNIFSC[Carbamidomethyl (C)]SVMHEALHNRFTQK_	P01860	1.52565	1.52565	1.12865e-15	1.16482e-14	88	P01860	IGHG3	Immunoglobulin heavy constant gamma 3	IGHG3_HUMAN	1	187.917	2.87917	Dengue	QC	NaN	NaN	NaN	70.355	0.141737
Dengue / QC	_ESATITC[Carbamidomethyl (C)]LVTGFSPADVFVQWM[Oxidation (M)]QR_	P01871	1.14547	1.14547	1.14057e-15	1.17496e-14	58	P01871	IGHM	Immunoglobulin heavy constant mu	IGHM_HUMAN	1	121.218	2.21218	Dengue	QC	NaN	NaN	NaN	44.7448	0.0931963
Dengue / QC	_DDWFMLGLR_	I3L145;P04278	0.627054	0.627054	1.15659e-15	1.18927e-14	54	I3L145;P04278	SHBG	Sex hormone-binding globulin	I3L145_HUMAN;SHBG_HUMAN	1	54.4408	1.54441	Dengue	QC	NaN	NaN	NaN	26.7859	0.253499
Dengue / QC	_VNIPLVTNEEC[Carbamidomethyl (C)]QK_	H0YAC1;P03952	1.37874	1.37874	1.17672e-15	1.20776e-14	42	H0YAC1;P03952	KLKB1	Plasma kallikrein (Fragment);Plasma kallikrein	H0YAC1_HUMAN;KLKB1_HUMAN	1	160.042	2.60042	Dengue	QC	NaN	NaN	NaN	34.6175	0.109751
Dengue / QC	_QC[Carbamidomethyl (C)]QDLGAFTESMVVFGC[Carbamidomethyl (C)]PN_	P01024	0.99384	0.99384	1.22278e-15	1.24818e-14	146	P01024	C3	Complement C3	CO3_HUMAN	1	99.1478	1.99148	Dengue	QC	NaN	NaN	NaN	106.249	0.0846189
Dengue / QC	_C[Carbamidomethyl (C)]FDHAAGTSYVVGETWEKPYQGWMMVDC[Carbamidomethyl (C)]TC[Carbamidomethyl (C)]LGEGSGR_	P02751;P02751-15;P02751-3;P02751-7	2.17615	2.17615	1.25944e-15	1.28093e-14	46	P02751;P02751-15;P02751-3;P02751-7	FN1	Fibronectin;Isoform 15 of Fibronectin;Isoform 3 of Fibronectin;Isoform 7 of Fibronectin	FINC_HUMAN	1	351.945	4.51945	Dengue	QC	NaN	NaN	NaN	41.125	0.150055
Dengue / QC	_EYVLPHFSVSIEPEYNFIGYK_	P01031	0.762396	0.762396	1.50657e-15	1.51849e-14	72	P01031	C5	Complement C5	CO5_HUMAN	1	69.6306	1.69631	Dengue	QC	NaN	NaN	NaN	66.217	0.0865725
Dengue / QC	_VREYYFAEAQIADFSDPAFISK_	P05546	0.542565	0.542565	1.64274e-15	1.64981e-14	120	P05546	SERPIND1	Heparin cofactor 2	HEP2_HUMAN	1	45.656	1.45656	Dengue	QC	NaN	NaN	NaN	104.967	0.0644017
Dengue / QC	_HQSAC[Carbamidomethyl (C)]KDSDWPFC[Carbamidomethyl (C)]SDEDWNYK_	P02671	2.35962	2.35962	1.77128e-15	1.77572e-14	46	P02671	FGA	Fibrinogen alpha chain	FIBA_HUMAN	1	413.236	5.13236	Dengue	QC	NaN	NaN	NaN	40.467	0.182898
Dengue / QC	_KWDPYKQGFGNVATNTDGK_	P02675	2.89552	2.89552	1.87682e-15	1.87816e-14	60	P02675	FGB	Fibrinogen beta chain	FIBB_HUMAN	1	644.114	7.44114	Dengue	QC	NaN	NaN	NaN	48.5232	0.224301
Dengue / QC	_HYDGSYSTFGERYGR_	P01023	4.3063	4.3063	1.90318e-15	1.90115e-14	48	P01023	A2M	Alpha-2-macroglobulin	A2MG_HUMAN	1	1878.45	19.7845	Dengue	QC	NaN	NaN	NaN	33.5375	0.263351
Dengue / QC	_GFLLLASLR_	P07996	1.48272	1.48272	1.90818e-15	1.90275e-14	74	P07996	THBS1	Thrombospondin-1	TSP1_HUMAN	1	179.475	2.79475	Dengue	QC	NaN	NaN	NaN	45.366	0.161338
Dengue / QC	_DFALQNPSAVPR_	P35858;P35858-2	0.593396	0.593396	1.93939e-15	1.93038e-14	118	P35858;P35858-2	IGFALS	Insulin-like growth factor-binding protein complex acid labile subunit;Isoform 2 of Insulin-like growth factor-binding protein complex acid labile subunit	ALS_HUMAN	1	50.8794	1.50879	Dengue	QC	NaN	NaN	NaN	113.347	0.0698083
Dengue / QC	_TPENYPNAGLTMNYC[Carbamidomethyl (C)]RNPDADKGPWC[Carbamidomethyl (C)]FTTDPSVR_	P00747	1.80002	1.80002	2.09026e-15	2.06958e-14	70	P00747	PLG	Plasminogen	PLMN_HUMAN	1	248.226	3.48226	Dengue	QC	NaN	NaN	NaN	58.4882	0.18062
Dengue / QC	_LVSANRLFGDK_	P01008	3.16124	3.16124	2.27409e-15	2.24366e-14	30	P01008	SERPINC1	Antithrombin-III	ANT3_HUMAN	1	794.6	8.946	Dengue	QC	NaN	NaN	NaN	25.2388	0.178506
Dengue / QC	_HADPDFTRKLWAYLTINQLLAER_	P19823	1.69809	1.69809	2.61795e-15	2.56039e-14	74	P19823	ITIH2	Inter-alpha-trypsin inhibitor heavy chain H2	ITIH2_HUMAN	1	224.472	3.24472	Dengue	QC	NaN	NaN	NaN	46.36	0.231757
Dengue / QC	_TEC[Carbamidomethyl (C)]FITGWGETQGTFGAGLLK_	P00747	0.658583	0.658583	2.94665e-15	2.86187e-14	94	P00747	PLG	Plasminogen	PLMN_HUMAN	1	57.8531	1.57853	Dengue	QC	NaN	NaN	NaN	85.3302	0.0760882
Dengue / QC	_MGPSSAVPGDSMQLAITGGNEEGFFTTR_	P23142-4	1.2326	1.2326	3.40177e-15	3.27552e-14	108	P23142-4	FBLN1	Isoform C of Fibulin-1	FBLN1_HUMAN	1	134.99	2.3499	Dengue	QC	NaN	NaN	NaN	99.9456	0.136765
Dengue / QC	_QC[Carbamidomethyl (C)]SKEDGGGWWYNR_	P02675	3.45457	3.45457	3.46891e-15	3.33444e-14	88	P02675	FGB	Fibrinogen beta chain	FIBB_HUMAN	1	996.299	10.963	Dengue	QC	NaN	NaN	NaN	60.5402	0.304507
Dengue / QC	_LNLVATPLFLKPGIPYPIKVQVK_	P01031	1.22478	1.22478	3.56997e-15	3.41985e-14	40	P01031	C5	Complement C5	CO5_HUMAN	1	133.72	2.3372	Dengue	QC	NaN	NaN	NaN	25.9154	0.12819
Dengue / QC	_ETYDFDIAVLR_	P00742	0.763622	0.763622	3.66442e-15	3.50434e-14	136	P00742	F10	Coagulation factor X	FA10_HUMAN	1	69.7748	1.69775	Dengue	QC	NaN	NaN	NaN	88.6759	0.0871324
Dengue / QC	_AIGYATAADC[Carbamidomethyl (C)]GR_	Q9Y6R7	1.06793	1.06793	3.74144e-15	3.5719e-14	100	Q9Y6R7	FCGBP	IgGFc-binding protein	FCGBP_HUMAN	1	109.643	2.09643	Dengue	QC	NaN	NaN	NaN	76.65	0.158278
Dengue / QC	_WSPELPVC[Carbamidomethyl (C)]APIIC[Carbamidomethyl (C)]PPPSIPTFATLR_	P02749	0.714736	0.714736	3.78362e-15	3.60602e-14	170	P02749	APOH	Beta-2-glycoprotein 1	APOH_HUMAN	1	64.1183	1.64118	Dengue	QC	NaN	NaN	NaN	142.572	0.086148
Dengue / QC	_IIRSSEDPNEDIVER_	P01591	3.91456	3.91456	3.98365e-15	3.7838e-14	34	P01591	JCHAIN	Immunoglobulin J chain	IGJ_HUMAN	1	1408	15.08	Dengue	QC	NaN	NaN	NaN	24.5512	0.204265
Dengue / QC	_TGC[Carbamidomethyl (C)]SLMGASVDSTLAFNTYVHFQGK_	P01019	0.434786	0.434786	4.14823e-15	3.92018e-14	36	P01019	AGT	Angiotensinogen	ANGT_HUMAN	1	35.171	1.35171	Dengue	QC	NaN	NaN	NaN	25.5163	0.262388
Dengue / QC	_YLGEEYVKAVGNLRK_	P02787	2.42533	2.42533	4.17639e-15	3.94015e-14	112	P02787	TF	Serotransferrin	TRFE_HUMAN	1	437.153	5.37153	Dengue	QC	NaN	NaN	NaN	83.0367	0.231349
Dengue / QC	_IADVTSGLIGGEDGR_	P80108	0.40454	0.40454	4.18497e-15	3.94161e-14	160	P80108	GPLD1	Phosphatidylinositol-glycan-specific phospholipase D	PHLD_HUMAN	1	32.3666	1.32367	Dengue	QC	NaN	NaN	NaN	150.567	0.0561711
Dengue / QC	_QSNNKYAASSYLSLTPEQWR_	P15814	2.24174	2.24174	4.4088e-15	4.13851e-14	68	P15814	IGLL1	Immunoglobulin lambda-like polypeptide 1	IGLL1_HUMAN	1	372.967	4.72967	Dengue	QC	NaN	NaN	NaN	52.6077	0.192249
Dengue / QC	_MDYKGDATVFFILPNQGK_	P29622	0.619243	0.619243	4.83349e-15	4.52958e-14	144	P29622	SERPINA4	Kallistatin	KAIN_HUMAN	1	53.6069	1.53607	Dengue	QC	NaN	NaN	NaN	83.5961	0.073748
Dengue / QC	_QLEQVIAKDLLPSRDR_	P02671	5.07659	5.07659	5.07832e-15	4.73526e-14	24	P02671	FGA	Fibrinogen alpha chain	FIBA_HUMAN	1	3274.47	33.7447	Dengue	QC	NaN	NaN	NaN	17.9491	0.174458
Dengue / QC	_VAQLEAQC[Carbamidomethyl (C)]QEPC[Carbamidomethyl (C)]KDTVQIHDITGK_	P02679;P02679-2	2.7832	2.7832	5.30027e-15	4.93401e-14	94	P02679;P02679-2	FGG	Fibrinogen gamma chain;Isoform Gamma-A of Fibrinogen gamma chain	FIBG_HUMAN	1	588.379	6.88379	Dengue	QC	NaN	NaN	NaN	67.6379	0.266353
Dengue / QC	_DLLPSRDR_	P02671	3.6193	3.6193	5.46649e-15	5.06593e-14	76	P02671	FGA	Fibrinogen alpha chain	FIBA_HUMAN	1	1128.9	12.289	Dengue	QC	NaN	NaN	NaN	52.89	0.302357
Dengue / QC	_DPDQTDGLGLSYLSSHIANVER_	P06396	1.25519	1.25519	5.59034e-15	5.15268e-14	58	P06396	GSN	Gelsolin	GELS_HUMAN	1	138.699	2.38699	Dengue	QC	NaN	NaN	NaN	40.0717	0.11258
Dengue / QC	_SLKVVPEGIR_	P01024	2.32683	2.32683	6.00856e-15	5.52906e-14	76	P01024	C3	Complement C3	CO3_HUMAN	1	401.702	5.01702	Dengue	QC	NaN	NaN	NaN	47.5629	0.220155
Dengue / QC	_VYC[Carbamidomethyl (C)]DMNTENGGWTVIQNR_	P02675	3.49539	3.49539	6.03503e-15	5.54431e-14	110	P02675	FGB	Fibrinogen beta chain	FIBB_HUMAN	1	1027.76	11.2776	Dengue	QC	NaN	NaN	NaN	76.7571	0.345174
Dengue / QC	_QGFGNVATNTDGK_	P02675	2.45292	2.45292	6.43712e-15	5.86563e-14	114	P02675	FGB	Fibrinogen beta chain	FIBB_HUMAN	1	447.522	5.47522	Dengue	QC	NaN	NaN	NaN	80.7897	0.26171
Dengue / QC	_IAQLPLTGSMSIIFFLPLK_	P36955	1.17317	1.17317	6.57646e-15	5.98287e-14	76	P36955	SERPINF1	Pigment epithelium-derived factor	PEDF_HUMAN	1	125.507	2.25507	Dengue	QC	NaN	NaN	NaN	38.8905	0.106577
Dengue / QC	_ALLVGEHLNIIVTPK_	P01031	0.741953	0.741953	6.81936e-15	6.18377e-14	80	P01031	C5	Complement C5	CO5_HUMAN	1	67.2438	1.67244	Dengue	QC	NaN	NaN	NaN	69.5435	0.100382
Dengue / QC	_MSSINADFAFNLYR_	P05543	1.44735	1.44735	7.63919e-15	6.87159e-14	46	P05543	SERPINA7	Thyroxine-binding globulin	THBG_HUMAN	1	172.706	2.72706	Dengue	QC	NaN	NaN	NaN	40.0472	0.138076
Dengue / QC	_AGELEVFNGYFVHFFAPDNLDPIPK_	P19823	0.927646	0.927646	8.17879e-15	7.33343e-14	170	P19823	ITIH2	Inter-alpha-trypsin inhibitor heavy chain H2	ITIH2_HUMAN	1	90.217	1.90217	Dengue	QC	NaN	NaN	NaN	137.381	0.0989779
Dengue / QC	_VADALTNAVAHVDDMPNALSALSDLHAHK_	P69905	0.73639	0.73639	8.58997e-15	7.6898e-14	160	P69905	HBA1	Hemoglobin subunit alpha	HBA_HUMAN	1	66.6002	1.666	Dengue	QC	NaN	NaN	NaN	143.96	0.0626704
Dengue / QC	_TAGYGINILGMDPLSTPFDNEFYNGLC[Carbamidomethyl (C)]NR_	P02748	0.797701	0.797701	8.77538e-15	7.83077e-14	166	P02748	C9	Complement component C9	CO9_HUMAN	1	73.8329	1.73833	Dengue	QC	NaN	NaN	NaN	96.9235	0.0877153
Dengue / QC	_SFAAGIQALGGTNINDAMLMAVQLLDSSNQEER_	Q14624	1.08344	1.08344	9.43156e-15	8.3896e-14	126	Q14624	ITIH4	Inter-alpha-trypsin inhibitor heavy chain H4	ITIH4_HUMAN	1	111.908	2.11908	Dengue	QC	NaN	NaN	NaN	34.6662	0.0859504
Dengue / QC	_LM[Oxidation (M)]NIFLKDSITTWEILAVSMSDKK_	P01024	0.998344	0.998344	9.46181e-15	8.40317e-14	92	P01024	C3	Complement C3	CO3_HUMAN	1	99.7705	1.99771	Dengue	QC	NaN	NaN	NaN	66.4121	0.14437
Dengue / QC	_NIQEYLSILTDPDGKGK_	P04114	0.758257	0.758257	9.80417e-15	8.67971e-14	40	P04114	APOB	Apolipoprotein B-100	APOB_HUMAN	1	69.1445	1.69145	Dengue	QC	NaN	NaN	NaN	29.9644	0.0957375
Dengue / QC	_NFATSNKM[Oxidation (M)]DMTFSK_	P04114	1.2564	1.2564	1.00712e-14	8.90205e-14	38	P04114	APOB	Apolipoprotein B-100	APOB_HUMAN	1	138.899	2.38899	Dengue	QC	NaN	NaN	NaN	21.7227	0.084783
Dengue / QC	_TLQGIPQMIGEVIR_	P04114	1.23135	1.23135	1.02904e-14	9.0815e-14	68	P04114	APOB	Apolipoprotein B-100	APOB_HUMAN	1	134.787	2.34787	Dengue	QC	NaN	NaN	NaN	61.3856	0.14326
Dengue / QC	_DSSTWLTAFVLKVLSLAQEQVGGSPEK_	A0A140TA49	1.39479	1.39479	1.03302e-14	9.10231e-14	74	A0A140TA49	C4A	Complement C4-A	A0A140TA49_HUMAN	1	162.95	2.6295	Dengue	QC	NaN	NaN	NaN	61.8777	0.17499
Dengue / QC	_TLMNLGGLAVAR_	P37802;X6RJP6	1.27907	1.27907	1.07281e-14	9.41254e-14	50	P37802;X6RJP6	TAGLN2	Transgelin-2;Transgelin-2 (Fragment)	TAGL2_HUMAN;X6RJP6_HUMAN	1	142.682	2.42682	Dengue	QC	NaN	NaN	NaN	35.4528	0.122754
Dengue / QC	_YRGDQDATMSILDISMMTGFAPDTDDLKQLANGVDR_	P01024	0.772075	0.772075	1.07327e-14	9.41254e-14	132	P01024	C3	Complement C3	CO3_HUMAN	1	70.7725	1.70772	Dengue	QC	NaN	NaN	NaN	100.154	0.0892211
Dengue / QC	_MC[Carbamidomethyl (C)]VDVNEC[Carbamidomethyl (C)]QRYPGR_	P23142	3.08978	3.08978	1.08271e-14	9.48049e-14	86	P23142	FBLN1	Fibulin-1	FBLN1_HUMAN	1	751.364	8.51364	Dengue	QC	NaN	NaN	NaN	65.2407	0.297273
Dengue / QC	_REEAPSLRPAPPPISGGGYR_	P02675	3.61144	3.61144	1.09873e-14	9.60575e-14	70	P02675	FGB	Fibrinogen beta chain	FIBB_HUMAN	1	1122.22	12.2222	Dengue	QC	NaN	NaN	NaN	53.2231	0.294271
Dengue / QC	_C[Carbamidomethyl (C)]VLFPYGGC[Carbamidomethyl (C)]QGNGNKFYSEKEC[Carbamidomethyl (C)]R_	P02760	2.96386	2.96386	1.16908e-14	1.0126e-13	34	P02760	AMBP	Protein AMBP	AMBP_HUMAN	1	680.21	7.8021	Dengue	QC	NaN	NaN	NaN	25.8306	0.193531
Dengue / QC	_GDFSSANNRDNTYNR_	P02671	3.98268	3.98268	1.27521e-14	1.09435e-13	42	P02671	FGA	Fibrinogen alpha chain	FIBA_HUMAN	1	1480.91	15.8091	Dengue	QC	NaN	NaN	NaN	29.313	0.298136
Dengue / QC	_SGLSTGWTQLSKLLELTGPKSLPAPWLSM[Oxidation (M)]APVSWITPGLK_	P04217	1.53697	1.53697	1.27714e-14	1.09435e-13	76	P04217	A1BG	Alpha-1B-glycoprotein	A1BG_HUMAN	1	190.184	2.90184	Dengue	QC	NaN	NaN	NaN	44.4929	0.27337
Dengue / QC	_VYC[Carbamidomethyl (C)]DM[Oxidation (M)]NTENGGWTVIQNR_	P02675	3.65328	3.65328	1.4912e-14	1.26616e-13	40	P02675	FGB	Fibrinogen beta chain	FIBB_HUMAN	1	1158.19	12.5819	Dengue	QC	NaN	NaN	NaN	27.8043	0.237821
Dengue / QC	_RYTIAALLSPYSYSTTAVVTNPK_	P02766	0.576545	0.576545	1.58318e-14	1.3402e-13	152	P02766	TTR	Transthyretin	TTHY_HUMAN	1	49.1274	1.49127	Dengue	QC	NaN	NaN	NaN	121.937	0.0757004
Dengue / QC	_ATWSGAVLAGRDAVLR_	P04217	3.89784	3.89784	1.60124e-14	1.35345e-13	64	P04217	A1BG	Alpha-1B-glycoprotein	A1BG_HUMAN	1	1390.62	14.9062	Dengue	QC	NaN	NaN	NaN	45.156	0.325484
Dengue / QC	_EIEEVLTPEMLMR_	P29622	0.581989	0.581989	1.64499e-14	1.38417e-13	120	P29622	SERPINA4	Kallistatin	KAIN_HUMAN	1	49.6911	1.49691	Dengue	QC	NaN	NaN	NaN	97.407	0.0772676
Dengue / QC	_GATLALTQVTPQDER_	P43121	1.06129	1.06129	2.24173e-14	1.85017e-13	66	P43121	MCAM	Cell surface glycoprotein MUC18	MUC18_HUMAN	1	108.68	2.0868	Dengue	QC	NaN	NaN	NaN	48.6639	0.130051
Dengue / QC	_TETITGFQVDAVPANGQTPIQR_	P02751;P02751-15;P02751-3;P02751-7	1.17909	1.17909	2.3641e-14	1.9483e-13	38	P02751;P02751-15;P02751-3;P02751-7	FN1	Fibronectin;Isoform 15 of Fibronectin;Isoform 3 of Fibronectin;Isoform 7 of Fibronectin	FINC_HUMAN	1	126.435	2.26435	Dengue	QC	NaN	NaN	NaN	26.7586	0.157248
Dengue / QC	_ITTGGDVINNGLWNMVSVEELEHSISIK_	P07225	0.773356	0.773356	2.38548e-14	1.96303e-13	126	P07225	PROS1	Vitamin K-dependent protein S	PROS_HUMAN	1	70.9241	1.70924	Dengue	QC	NaN	NaN	NaN	97.6362	0.0940415
Dengue / QC	_DLGEENFKALVLIAFAQYLQQC[Carbamidomethyl (C)]PFEDHVK_	P02768	3.04619	3.04619	2.56599e-14	2.10847e-13	42	P02768	ALB	Serum albumin	ALBU_HUMAN	1	726.028	8.26028	Dengue	QC	NaN	NaN	NaN	34.8478	0.296204
Dengue / QC	_MKPVPDLVPGNFK_	P02671	3.45718	3.45718	2.83233e-14	2.31376e-13	80	P02671	FGA	Fibrinogen alpha chain	FIBA_HUMAN	1	998.283	10.9828	Dengue	QC	NaN	NaN	NaN	58.6969	0.322662
Dengue / QC	_DYELLC[Carbamidomethyl (C)]LDGTRK_	P02787	2.12504	2.12504	2.90684e-14	2.36772e-13	78	P02787	TF	Serotransferrin	TRFE_HUMAN	1	336.216	4.36216	Dengue	QC	NaN	NaN	NaN	40.702	0.180325
Dengue / QC	_GGETSEM[Oxidation (M)]YLIQPDSSVKPYR_	P02675	4.03118	4.03118	2.92853e-14	2.38192e-13	46	P02675	FGB	Fibrinogen beta chain	FIBB_HUMAN	1	1534.96	16.3496	Dengue	QC	NaN	NaN	NaN	32.6501	0.292503
Dengue / QC	_C[Carbamidomethyl (C)]YFPYLENGYNQNYGR_	P08603	0.827511	0.827511	3.10179e-14	2.51191e-13	92	P08603	CFH	Complement factor H	CFAH_HUMAN	1	77.4621	1.77462	Dengue	QC	NaN	NaN	NaN	71.0079	0.0789093
Dengue / QC	_GSWYSMR_	P02675	3.00698	3.00698	3.19604e-14	2.5845e-13	106	P02675	FGB	Fibrinogen beta chain	FIBB_HUMAN	1	703.879	8.03879	Dengue	QC	NaN	NaN	NaN	77.8679	0.310845
Dengue / QC	_DSGVPDRFSGSGSGTDFTLK[Methyl (KR)]_	P06310	0.242852	0.242852	3.37544e-14	2.71781e-13	26	P06310	IGKV2-30	Immunoglobulin kappa variable 2-30	KV230_HUMAN	1	18.333	1.18333	Dengue	QC	NaN	NaN	NaN	14.8926	0.263465
Dengue / QC	_AAPSVTLFPPSSEELQANKATLVC[Carbamidomethyl (C)]LISDFYPGAVTVAWKADSSPVK_	P0DOY2	2.29831	2.29831	3.4913e-14	2.80707e-13	88	P0DOY2	IGLC2	Immunoglobulin lambda constant 2	IGLC2_HUMAN	1	391.881	4.91881	Dengue	QC	NaN	NaN	NaN	59.9204	0.239433
Dengue / QC	_YFKPGM[Oxidation (M)]PFDLM[Oxidation (M)]VFVTNPDGSPAYR_	P01024	-1.02227	1.02227	3.64161e-14	2.91954e-13	38	P01024	C3	Complement C3	CO3_HUMAN	1	-50.7658	0.492342	Dengue	QC	NaN	NaN	NaN	21.0957	0.3233
Dengue / QC	_EYLIMGLDGATYDLEGHPQYLLDSNSWIEEMPSER_	P0C0L5	0.476767	0.476767	4.08951e-14	3.26439e-13	46	P0C0L5	C4B	Complement C4-B	CO4B_HUMAN	1	39.1622	1.39162	Dengue	QC	NaN	NaN	NaN	22.613	0.273133
Dengue / QC	_MKPVPDLVPGNFKSQLQK_	P02671	3.86604	3.86604	4.08746e-14	3.26439e-13	28	P02671	FGA	Fibrinogen alpha chain	FIBA_HUMAN	1	1358.12	14.5812	Dengue	QC	NaN	NaN	NaN	17.0574	0.169031
Dengue / QC	_LATALQKLEEAEKAADESER_	P67936	1.5472	1.5472	4.81477e-14	3.8164e-13	30	P67936	TPM4	Tropomyosin alpha-4 chain	TPM4_HUMAN	1	192.25	2.9225	Dengue	QC	NaN	NaN	NaN	24.3757	0.122383
Dengue / QC	_GSSTWLTAFVLKVLSLAQEQVGGSPEK_	P0C0L5	0.538088	0.538088	4.91411e-14	3.87869e-13	92	P0C0L5	C4B	Complement C4-B	CO4B_HUMAN	1	45.2047	1.45205	Dengue	QC	NaN	NaN	NaN	51.1787	0.0992795
Dengue / QC	_LELELRPTGEIEQYSVSATYELQR_	P04114	0.758572	0.758572	4.95552e-14	3.90039e-13	152	P04114	APOB	Apolipoprotein B-100	APOB_HUMAN	1	69.1816	1.69182	Dengue	QC	NaN	NaN	NaN	128.819	0.0852886
Dengue / QC	_V[Acetyl (Protein N-term)]LSPADKTNVK_	P69905	1.51415	1.51415	5.03252e-14	3.95067e-13	138	P69905	HBA1	Hemoglobin subunit alpha	HBA_HUMAN	1	185.63	2.8563	Dengue	QC	NaN	NaN	NaN	105.445	0.136739
Dengue / QC	_AKGQPREPQVYTLPPSQEEMTK_	P01861	1.12312	1.12312	5.03351e-14	3.95067e-13	154	P01861	IGHG4	Immunoglobulin heavy constant gamma 4	IGHG4_HUMAN	1	117.817	2.17817	Dengue	QC	NaN	NaN	NaN	137.859	0.115445
Dengue / QC	_MENAELDVPIQSVFTR_	P07996	0.640528	0.640528	5.08237e-14	3.98344e-13	108	P07996	THBS1	Thrombospondin-1	TSP1_HUMAN	1	55.8899	1.5589	Dengue	QC	NaN	NaN	NaN	84.8963	0.0970449
Dengue / QC	_TC[Carbamidomethyl (C)]QSWSSMTPHWHQR_	P08519	2.43757	2.43757	5.42743e-14	4.23611e-13	60	P08519	LPA	Apolipoprotein(a)	APOA_HUMAN	1	441.729	5.41729	Dengue	QC	NaN	NaN	NaN	46.5339	0.219329
Dengue / QC	_VFEAM[Oxidation (M)]NSYDLGC[Carbamidomethyl (C)]GPGGGDSALQVFQAAGLAFSDGDQWTLSR_	P0C0L5	1.46492	1.46492	5.53537e-14	4.30983e-13	72	P0C0L5	C4B	Complement C4-B	CO4B_HUMAN	1	176.048	2.76048	Dengue	QC	NaN	NaN	NaN	13.2521	0.175329
Dengue / QC	_GTVIDVTDFVNWASSINDAPVLISQK_	P02748	0.763181	0.763181	5.53726e-14	4.30983e-13	106	P02748	C9	Complement component C9	CO9_HUMAN	1	69.7229	1.69723	Dengue	QC	NaN	NaN	NaN	97.8405	0.0981794
Dengue / QC	_GVYSSDVFDIFPGTYQTLEMFPR_	P00450	0.64601	0.64601	5.82785e-14	4.52181e-13	176	P00450	CP	Ceruloplasmin	CERU_HUMAN	1	56.4835	1.56483	Dengue	QC	NaN	NaN	NaN	86.5111	0.0787843
Dengue / QC	_LFLGALPGEDSSTSFC[Carbamidomethyl (C)]LNGLWAQGQR_	I3L145;P04278	1.57412	1.57412	5.84188e-14	4.52181e-13	76	I3L145;P04278	SHBG	Sex hormone-binding globulin	I3L145_HUMAN;SHBG_HUMAN	1	197.754	2.97754	Dengue	QC	NaN	NaN	NaN	69.1972	0.160781
Dengue / QC	_VQLSNDFDEYIMAIEQTIKSGSDEVQVGQQR_	P01024	3.5667	3.5667	5.83674e-14	4.52181e-13	58	P01024	C3	Complement C3	CO3_HUMAN	1	1084.9	11.849	Dengue	QC	NaN	NaN	NaN	35.6764	0.312496
Dengue / QC	_VVAGVANALAHKYH_	P68871	1.25822	1.25822	6.05336e-14	4.67904e-13	38	P68871	HBB	Hemoglobin subunit beta	HBB_HUMAN	1	139.2	2.392	Dengue	QC	NaN	NaN	NaN	27.9763	0.0926126
Dengue / QC	_VTIMWTPPESAVTGYRVDVIPVNLPGEHGQR_	P02751;P02751-15;P02751-3;P02751-7	0.549194	0.549194	6.23088e-14	4.80301e-13	148	P02751;P02751-15;P02751-3;P02751-7	FN1	Fibronectin;Isoform 15 of Fibronectin;Isoform 3 of Fibronectin;Isoform 7 of Fibronectin	FINC_HUMAN	1	46.3268	1.46327	Dengue	QC	NaN	NaN	NaN	136.639	0.0802492
Dengue / QC	_NIFISPVSISMALAMLSLGTC[Carbamidomethyl (C)]GHTR_	P08185	0.751199	0.751199	6.28497e-14	4.83804e-13	132	P08185	SERPINA6	Corticosteroid-binding globulin	CBG_HUMAN	1	68.3191	1.68319	Dengue	QC	NaN	NaN	NaN	119.633	0.0911564
Dengue / QC	_C[Carbamidomethyl (C)]PAPELLGGPSVFLFPPKPKDTLMISR_	P01860	4.06201	4.06201	6.46048e-14	4.95953e-13	38	P01860	IGHG3	Immunoglobulin heavy constant gamma 3	IGHG3_HUMAN	1	1570.27	16.7027	Dengue	QC	NaN	NaN	NaN	26.2171	0.266688
Dengue / QC	_AINEKLGQYASPTAKR_	P0C0L5	3.55336	3.55336	7.12172e-14	5.44476e-13	50	P0C0L5	C4B	Complement C4-B	CO4B_HUMAN	1	1074	11.74	Dengue	QC	NaN	NaN	NaN	31.8107	0.265816
Dengue / QC	_QSNNKYAASSYLSLTPEQWKSHR_	P0DOY2	3.65982	3.65982	7.18376e-14	5.47832e-13	74	P0DOY2	IGLC2	Immunoglobulin lambda constant 2	IGLC2_HUMAN	1	1163.9	12.639	Dengue	QC	NaN	NaN	NaN	52.0712	0.31097
Dengue / QC	_VFLDC[Carbamidomethyl (C)]C[Carbamidomethyl (C)]NYITELR_	P01024	0.969113	0.969113	7.23813e-14	5.50373e-13	102	P01024	C3	Complement C3	CO3_HUMAN	1	95.7637	1.95764	Dengue	QC	NaN	NaN	NaN	79.2549	0.117396
Dengue / QC	_YEASILTHDSSIR_	P02679;P02679-2	2.26408	2.26408	7.38965e-14	5.61133e-13	58	P02679;P02679-2	FGG	Fibrinogen gamma chain;Isoform Gamma-A of Fibrinogen gamma chain	FIBG_HUMAN	1	380.346	4.80346	Dengue	QC	NaN	NaN	NaN	39.6325	0.186652
Dengue / QC	_TPKSPVGVQPILNEHTFC[Carbamidomethyl (C)]AGMSK_	P00738	3.11719	3.11719	7.52919e-14	5.70955e-13	96	P00738	HP	Haptoglobin	HPT_HUMAN	1	767.696	8.67696	Dengue	QC	NaN	NaN	NaN	54.5667	0.302356
Dengue / QC	_AHYGGFTVQNEANK_	P02675	2.96067	2.96067	8.2084e-14	6.1911e-13	66	P02675	FGB	Fibrinogen beta chain	FIBB_HUMAN	1	678.487	7.78487	Dengue	QC	NaN	NaN	NaN	53.3026	0.247293
Dengue / QC	_FSDEGTHESQISFTIEGPLTSFGLSNK_	P04114	1.25891	1.25891	8.30737e-14	6.24892e-13	74	P04114	APOB	Apolipoprotein B-100	APOB_HUMAN	1	139.315	2.39315	Dengue	QC	NaN	NaN	NaN	59.2692	0.142206
Dengue / QC	_ELLALIQLER_	Q16610	0.883606	0.883606	8.36587e-14	6.27608e-13	166	Q16610	ECM1	Extracellular matrix protein 1	ECM1_HUMAN	1	84.4981	1.84498	Dengue	QC	NaN	NaN	NaN	145.787	0.0950146
Dengue / QC	_ANRPFLVFIREVPLNTIIFM[Oxidation (M)]GR_	P01008	1.57664	1.57664	8.71681e-14	6.53061e-13	62	P01008	SERPINC1	Antithrombin-III	ANT3_HUMAN	1	198.275	2.98275	Dengue	QC	NaN	NaN	NaN	52.2672	0.169327
Dengue / QC	_C[Carbamidomethyl (C)]IEGTC[Carbamidomethyl (C)]VC[Carbamidomethyl (C)]KLPYQC[Carbamidomethyl (C)]PK_	E7ETH0;G3XAM2;P05156	2.27607	2.27607	9.37313e-14	6.9757e-13	48	E7ETH0;G3XAM2;P05156	CFI	Complement factor I	E7ETH0_HUMAN;G3XAM2_HUMAN;CFAI_HUMAN	1	384.357	4.84357	Dengue	QC	NaN	NaN	NaN	40.2432	0.21727
Dengue / QC	_LHLDYIGPC[Carbamidomethyl (C)]K_	P09486	0.953261	0.953261	9.90237e-14	7.3017e-13	52	P09486	SPARC	SPARC	SPRC_HUMAN	1	93.6244	1.93624	Dengue	QC	NaN	NaN	NaN	40.2114	0.102948
Dengue / QC	_LYSVSYLLK_	P21333;P21333-2;Q5HY54	0.955428	0.955428	1.05955e-13	7.79231e-13	60	P21333;P21333-2;Q5HY54	FLNA	Filamin-A;Isoform 2 of Filamin-A;Filamin-A	FLNA_HUMAN;FLNA_HUMAN;Q5HY54_HUMAN	1	93.9154	1.93915	Dengue	QC	NaN	NaN	NaN	54.5371	0.114135
Dengue / QC	_TSTADYAMFK_	P02679;P02679-2	3.11106	3.11106	1.06387e-13	7.81379e-13	122	P02679;P02679-2	FGG	Fibrinogen gamma chain;Isoform Gamma-A of Fibrinogen gamma chain	FIBG_HUMAN	1	764.017	8.64017	Dengue	QC	NaN	NaN	NaN	89.8536	0.316273
Dengue / QC	_LSFYYLIMAK_	P01023	0.977149	0.977149	1.07279e-13	7.86899e-13	114	P01023	A2M	Alpha-2-macroglobulin	A2MG_HUMAN	1	96.8571	1.96857	Dengue	QC	NaN	NaN	NaN	93.3705	0.133814
Dengue / QC	_FDEFFSEGC[Carbamidomethyl (C)]APGSKKDSSLC[Carbamidomethyl (C)]K_	P02787	2.05088	2.05088	1.16782e-13	8.53255e-13	40	P02787	TF	Serotransferrin	TRFE_HUMAN	1	314.36	4.1436	Dengue	QC	NaN	NaN	NaN	35.0815	0.186235
Dengue / QC	_GLPAPIEKTISK_	P01859	3.67865	3.67865	1.23191e-13	8.97744e-13	78	P01859	IGHG2	Immunoglobulin heavy constant gamma 2	IGHG2_HUMAN	1	1180.51	12.8051	Dengue	QC	NaN	NaN	NaN	47.41	0.342799
Dengue / QC	_ALSGFSLQSC[Carbamidomethyl (C)]R_	P03951	1.30152	1.30152	1.30285e-13	9.45744e-13	44	P03951	F11	Coagulation factor XI	FA11_HUMAN	1	146.488	2.46488	Dengue	QC	NaN	NaN	NaN	36.2031	0.128415
Dengue / QC	_SASDLTWDNLKGKK_	P02787	3.61285	3.61285	1.35927e-13	9.84154e-13	62	P02787	TF	Serotransferrin	TRFE_HUMAN	1	1123.42	12.2342	Dengue	QC	NaN	NaN	NaN	39.8639	0.308786
Dengue / QC	_LELELRPTGEIEQYSVSATYELQREDR_	P04114	0.772609	0.772609	1.43978e-13	1.03842e-12	162	P04114	APOB	Apolipoprotein B-100	APOB_HUMAN	1	70.8357	1.70836	Dengue	QC	NaN	NaN	NaN	126.355	0.088504
Dengue / QC	_SITLFVQEDR_	P07996	0.796386	0.796386	1.44355e-13	1.0398e-12	90	P07996	THBS1	Thrombospondin-1	TSP1_HUMAN	1	73.6746	1.73675	Dengue	QC	NaN	NaN	NaN	85.0931	0.0871522
Dengue / QC	_GSESGIFTNTKESSSHHPGIAEFPSR_	P02671	2.82817	2.82817	1.66719e-13	1.19322e-12	74	P02671	FGA	Fibrinogen alpha chain	FIBA_HUMAN	1	610.171	7.10171	Dengue	QC	NaN	NaN	NaN	52.5324	0.275218
Dengue / QC	_WERPFEVKDTEEEDFHVDQVTTVK_	P01009	1.29395	1.29395	1.68274e-13	1.20282e-12	72	P01009	SERPINA1	Alpha-1-antitrypsin	A1AT_HUMAN	1	145.199	2.45199	Dengue	QC	NaN	NaN	NaN	63.2235	0.12746
Dengue / QC	_NPDAEIRPWC[Carbamidomethyl (C)]YTMDPSVR_	P08519	1.31794	1.31794	1.77667e-13	1.26834e-12	70	P08519	LPA	Apolipoprotein(a)	APOA_HUMAN	1	149.31	2.4931	Dengue	QC	NaN	NaN	NaN	27.1417	0.101195
Dengue / QC	_NIPGDFEC[Carbamidomethyl (C)]EC[Carbamidomethyl (C)]PEGYRYNLK_	P07225	2.21765	2.21765	1.84207e-13	1.31336e-12	56	P07225	PROS1	Vitamin K-dependent protein S	PROS_HUMAN	1	365.134	4.65134	Dengue	QC	NaN	NaN	NaN	48.012	0.204115
Dengue / QC	_EGGQTAPASTR_	P06396	1.115	1.115	1.90542e-13	1.35336e-12	98	P06396	GSN	Gelsolin	GELS_HUMAN	1	116.595	2.16595	Dengue	QC	NaN	NaN	NaN	89.8921	0.124897
Dengue / QC	_ALVDTLKFVTQAEGAK_	P04114	1.74716	1.74716	1.90432e-13	1.35336e-12	84	P04114	APOB	Apolipoprotein B-100	APOB_HUMAN	1	235.697	3.35697	Dengue	QC	NaN	NaN	NaN	65.7807	0.183674
Dengue / QC	_TMTIHNGMFFSTYDRDNDGWLTSDPR_	P02675	3.28712	3.28712	2.07023e-13	1.4667e-12	30	P02675	FGB	Fibrinogen beta chain	FIBB_HUMAN	1	876.16	9.7616	Dengue	QC	NaN	NaN	NaN	22.001	0.189192
Dengue / QC	_HVSSPLASYFLSFPYAR_	P80108	1.00606	1.00606	2.07461e-13	1.46794e-12	86	P80108	GPLD1	Phosphatidylinositol-glycan-specific phospholipase D	PHLD_HUMAN	1	100.842	2.00842	Dengue	QC	NaN	NaN	NaN	39.6316	0.108824
Dengue / QC	_AEDLVGKSLYVSATVILHSGSDMVQAER_	P01024	1.69158	1.69158	2.10354e-13	1.48654e-12	112	P01024	C3	Complement C3	CO3_HUMAN	1	223.01	3.2301	Dengue	QC	NaN	NaN	NaN	94.5734	0.178428
Dengue / QC	_ENPAVIDFELAPIVDLVR_	P13671	0.700451	0.700451	2.11063e-13	1.48967e-12	136	P13671	C6	Complement component C6	CO6_HUMAN	1	62.5012	1.62501	Dengue	QC	NaN	NaN	NaN	129.707	0.0912234
Dengue / QC	_GFQHLLHTLNLPGHGLETR_	P29622	0.889229	0.889229	2.37704e-13	1.66512e-12	122	P29622	SERPINA4	Kallistatin	KAIN_HUMAN	1	85.2186	1.85219	Dengue	QC	NaN	NaN	NaN	105.334	0.103162
Dengue / QC	_SLAPYAQDTQEKLNHQLEGLTFQMK_	P06727	1.01375	1.01375	2.55037e-13	1.77544e-12	108	P06727	APOA4	Apolipoprotein A-IV	APOA4_HUMAN	1	101.915	2.01915	Dengue	QC	NaN	NaN	NaN	98.2365	0.109889
Dengue / QC	_GWSPTPR_	Q02985;Q02985-2	1.49085	1.49085	2.68329e-13	1.85187e-12	46	Q02985;Q02985-2	CFHR3	Complement factor H-related protein 3;Isoform 2 of Complement factor H-related protein 3	FHR3_HUMAN	1	181.054	2.81054	Dengue	QC	NaN	NaN	NaN	41.2244	0.137834
Dengue / QC	_GDDITMVLILPKPEK_	P01008	1.12887	1.12887	2.68728e-13	1.85234e-12	70	P01008	SERPINC1	Antithrombin-III	ANT3_HUMAN	1	118.688	2.18688	Dengue	QC	NaN	NaN	NaN	63.3646	0.150032
Dengue / QC	_QGLLPVLESFK_	P02647	1.5071	1.5071	2.90249e-13	1.98845e-12	38	P02647	APOA1	Apolipoprotein A-I	APOA1_HUMAN	1	184.238	2.84238	Dengue	QC	NaN	NaN	NaN	28.3407	0.115885
Dengue / QC	_IDQNVEELK_	P06727	0.554603	0.554603	2.92655e-13	2.00005e-12	152	P06727	APOA4	Apolipoprotein A-IV	APOA4_HUMAN	1	46.8765	1.46876	Dengue	QC	NaN	NaN	NaN	143.563	0.072536
Dengue / QC	_SLGPNSC[Carbamidomethyl (C)]SANGPGLYLIHGPNLYC[Carbamidomethyl (C)]YSDVEK_	P02790	0.587498	0.587498	3.24894e-13	2.20158e-12	174	P02790	HPX	Hemopexin	HEMO_HUMAN	1	50.2638	1.50264	Dengue	QC	NaN	NaN	NaN	141.535	0.0624915
Dengue / QC	_VNWEEEAASGLLTSLKDNVPK_	P04114	0.674028	0.674028	3.46333e-13	2.33556e-12	118	P04114	APOB	Apolipoprotein B-100	APOB_HUMAN	1	59.5521	1.59552	Dengue	QC	NaN	NaN	NaN	94.4128	0.0888222
Dengue / QC	_LGFTDLFSK_	P29622	0.680181	0.680181	3.55326e-13	2.38187e-12	58	P29622	SERPINA4	Kallistatin	KAIN_HUMAN	1	60.2341	1.60234	Dengue	QC	NaN	NaN	NaN	42.8941	0.108215
Dengue / QC	_LNILNNNYK_	O14791;O14791-2	0.623685	0.623685	3.70269e-13	2.47023e-12	118	O14791;O14791-2	APOL1	Apolipoprotein L1;Isoform 2 of Apolipoprotein L1	APOL1_HUMAN	1	54.0805	1.54081	Dengue	QC	NaN	NaN	NaN	99.9453	0.0787848
Dengue / QC	_QMPGKGLEWMGR_	A0A0J9YXX1	0.780357	0.780357	4.49473e-13	2.96684e-12	34	A0A0J9YXX1	IGHV5-10-1	Immunoglobulin heavy variable 5-10-1	HV5X1_HUMAN	1	71.7556	1.71756	Dengue	QC	NaN	NaN	NaN	25.4723	0.0627739
Dengue / QC	_QDGSVDFGR_	P02675	3.33425	3.33425	4.65395e-13	3.06112e-12	122	P02675	FGB	Fibrinogen beta chain	FIBB_HUMAN	1	908.576	10.0858	Dengue	QC	NaN	NaN	NaN	90.3836	0.358584
Dengue / QC	_NLC[Carbamidomethyl (C)]EAMENFMQQLK_	P20851;P20851-2	1.40995	1.40995	4.65243e-13	3.06112e-12	38	P20851;P20851-2	C4BPB	C4b-binding protein beta chain;Isoform 2 of C4b-binding protein beta chain	C4BPB_HUMAN	1	165.727	2.65727	Dengue	QC	NaN	NaN	NaN	17.4934	0.214604
Dengue / QC	_SAVTALWGKVNVDEVGGEALGR_	P68871	0.936489	0.936489	5.29764e-13	3.46014e-12	160	P68871	HBB	Hemoglobin subunit beta	HBB_HUMAN	1	91.3865	1.91387	Dengue	QC	NaN	NaN	NaN	139.824	0.128988
Dengue / QC	_IYEDHDATQQLQGFYSQVAKPLLVDVDLQYPQDAVLALTQNHHK_	P19827	0.78661	0.78661	5.32209e-13	3.47206e-12	168	P19827	ITIH1	Inter-alpha-trypsin inhibitor heavy chain H1	ITIH1_HUMAN	1	72.5016	1.72502	Dengue	QC	NaN	NaN	NaN	132.499	0.0850984
Dengue / QC	_EPC[Carbamidomethyl (C)]VESLVSQYFQTVTDYGKDLMEK_	P02652;V9GYM3	0.801214	0.801214	5.60796e-13	3.64583e-12	170	P02652;V9GYM3	APOA2	Apolipoprotein A-II	APOA2_HUMAN;V9GYM3_HUMAN	1	74.2566	1.74257	Dengue	QC	NaN	NaN	NaN	101.203	0.0836982
Dengue / QC	_C[Carbamidomethyl (C)]STSSLLEAC[Carbamidomethyl (C)]TFRRP_	P02787	3.62935	3.62935	5.94211e-13	3.85392e-12	104	P02787	TF	Serotransferrin	TRFE_HUMAN	1	1137.5	12.375	Dengue	QC	NaN	NaN	NaN	68.3874	0.366067
Dengue / QC	_NGFKSHALQLNNR_	P0C0L5	3.12185	3.12185	5.96215e-13	3.85818e-12	58	P0C0L5	C4B	Complement C4-B	CO4B_HUMAN	1	770.504	8.70504	Dengue	QC	NaN	NaN	NaN	46.4189	0.233259
Dengue / QC	_C[Carbamidomethyl (C)]TLKPC[Carbamidomethyl (C)]DYPDIKHGGLYHENMR_	P08603	3.70037	3.70037	6.34634e-13	4.08792e-12	28	P08603	CFH	Complement factor H	CFAH_HUMAN	1	1199.93	12.9993	Dengue	QC	NaN	NaN	NaN	20.4667	0.225779
Dengue / QC	_FPSGTFEQVSQLVK_	P02774;P02774-3	0.78661	0.78661	6.78712e-13	4.3419e-12	62	P02774;P02774-3	GC	Vitamin D-binding protein;Isoform 3 of Vitamin D-binding protein	VTDB_HUMAN	1	72.5017	1.72502	Dengue	QC	NaN	NaN	NaN	56.478	0.0760053
Dengue / QC	_C[Carbamidomethyl (C)]LPVTAPENGKIVSSAMEPDREYHFGQAVR_	P08603	3.28533	3.28533	6.83943e-13	4.37037e-12	54	P08603	CFH	Complement factor H	CFAH_HUMAN	1	874.951	9.74951	Dengue	QC	NaN	NaN	NaN	33.2445	0.277705
Dengue / QC	_DRQHLPLIK_	P02671	2.16567	2.16567	6.86285e-13	4.38035e-12	34	P02671	FGA	Fibrinogen alpha chain	FIBA_HUMAN	1	348.675	4.48675	Dengue	QC	NaN	NaN	NaN	29.4338	0.157755
Dengue / QC	_AC[Carbamidomethyl (C)]EPGVDYVYKTR_	P01024	3.06958	3.06958	7.55841e-13	4.79698e-12	32	P01024	C3	Complement C3	CO3_HUMAN	1	739.526	8.39526	Dengue	QC	NaN	NaN	NaN	20.6777	0.15691
Dengue / QC	_AC[Carbamidomethyl (C)]GAC[Carbamidomethyl (C)]PLWGKC[Carbamidomethyl (C)]DAESSK_	P10643	3.07254	3.07254	7.65972e-13	4.85029e-12	44	P10643	C7	Complement component C7	CO7_HUMAN	1	741.256	8.41256	Dengue	QC	NaN	NaN	NaN	32.187	0.21357
Dengue / QC	_TMSGLEC[Carbamidomethyl (C)]QAWDSQSPHAHGYIPSKFPNKNLK_	P00747	1.36682	1.36682	7.76239e-13	4.90976e-12	82	P00747	PLG	Plasminogen	PLMN_HUMAN	1	157.902	2.57902	Dengue	QC	NaN	NaN	NaN	71.2587	0.134481
Dengue / QC	_TEDTALYYC[Carbamidomethyl (C)]AK[Methyl (KR)]_	A0A0B4J1X8	10.2125	10.2125	7.77459e-13	4.91193e-12	26	A0A0B4J1X8	IGHV3-43	Immunoglobulin heavy variable 3-43	HV343_HUMAN	1	118551	1186.51	Dengue	QC	NaN	NaN	NaN	17.4671	0.221356
Dengue / QC	_AGAAPYVQAFDSLLAGPVAEYLK_	Q01518;Q5T0R1;Q5T0R2;Q5T0R3;Q5T0R4;Q5T0R5;Q5T0R6;Q5T0R7	1.43575	1.43575	8.36353e-13	5.2662e-12	38	Q01518;Q5T0R1;Q5T0R2;Q5T0R3;Q5T0R4;Q5T0R5;Q5T0R6;Q5T0R7	CAP1	Adenylyl cyclase-associated protein 1;Adenylyl cyclase-associated protein 1 (Fragment);Adenylyl cyclase-associated protein 1 (Fragment);Adenylyl cyclase-associated protein 1 (Fragment);Adenylyl cyclase-associated protein 1 (Fragment);Adenylyl cyclase-associated protein 1 (Fragment);Adenylyl cyclase-associated protein 1 (Fragment);Adenylyl cyclase-associated protein 1 (Fragment)	CAP1_HUMAN;Q5T0R1_HUMAN;Q5T0R2_HUMAN;Q5T0R3_HUMAN;Q5T0R4_HUMAN;Q5T0R5_HUMAN;Q5T0R6_HUMAN;Q5T0R7_HUMAN	1	170.522	2.70522	Dengue	QC	NaN	NaN	NaN	26.8196	0.137424
Dengue / QC	_DNSK[Methyl (KR)]NTLYLQMNSLR_	A0A0J9YVT0;P0DP02	-0.599709	0.599709	8.38548e-13	5.2741e-12	172	A0A0J9YVT0;P0DP02	IGHV3-33;IGHV3-30-3	Immunoglobulin heavy variable 3-33 (Fragment);Immunoglobulin heavy variable 3-30-3	A0A0J9YVT0_HUMAN;HVC33_HUMAN	1	-34.0113	0.659887	Dengue	QC	NaN	NaN	NaN	71.519	0.457988
Dengue / QC	_TPC[Carbamidomethyl (C)]TVSC[Carbamidomethyl (C)]NIPVVSGKEC[Carbamidomethyl (C)]EEIIRK_	P02675	3.07836	3.07836	8.97306e-13	5.61844e-12	84	P02675	FGB	Fibrinogen beta chain	FIBB_HUMAN	1	744.656	8.44656	Dengue	QC	NaN	NaN	NaN	59.499	0.303989
Dengue / QC	_PLLVDVDLQYPQDAVLALTQNHHK_	P19827	0.989882	0.989882	9.04413e-13	5.65662e-12	98	P19827	ITIH1	Inter-alpha-trypsin inhibitor heavy chain H1	ITIH1_HUMAN	1	98.6022	1.98602	Dengue	QC	NaN	NaN	NaN	85.6517	0.129753
Dengue / QC	_KVFLDC[Carbamidomethyl (C)]C[Carbamidomethyl (C)]NYITELR_	P01024	1.32561	1.32561	9.19721e-13	5.74595e-12	38	P01024	C3	Complement C3	CO3_HUMAN	1	150.639	2.50639	Dengue	QC	NaN	NaN	NaN	24.1618	0.0983914
Dengue / QC	_QVKDNENVVNEYSSELEK_	P02675	1.94363	1.94363	9.377e-13	5.84524e-12	40	P02675	FGB	Fibrinogen beta chain	FIBB_HUMAN	1	284.674	3.84674	Dengue	QC	NaN	NaN	NaN	35.2515	0.16307
Dengue / QC	_WDPYKQGFGNVATNTDGK_	P02675	1.92017	1.92017	9.69936e-13	6.0194e-12	36	P02675	FGB	Fibrinogen beta chain	FIBB_HUMAN	1	278.468	3.78468	Dengue	QC	NaN	NaN	NaN	30.9381	0.154734
Dengue / QC	_VVQGKEPAHLMSLFGGKPMIIYK_	P06396	0.644157	0.644157	9.73294e-13	6.03356e-12	100	P06396	GSN	Gelsolin	GELS_HUMAN	1	56.2826	1.56283	Dengue	QC	NaN	NaN	NaN	73.6208	0.0882626
Dengue / QC	_SQLQKVPPEWK_	P02671	5.54586	5.54586	9.90875e-13	6.13576e-12	20	P02671	FGA	Fibrinogen alpha chain	FIBA_HUMAN	1	4571.65	46.7165	Dengue	QC	NaN	NaN	NaN	12.3396	0.161256
Dengue / QC	_LLIYDASNRATGIPAR_	P04433	4.99942	4.99942	1.00859e-12	6.23166e-12	52	P04433	IGKV3-11	Immunoglobulin kappa variable 3-11	KV311_HUMAN	1	3098.72	31.9872	Dengue	QC	NaN	NaN	NaN	27.2962	0.378
Dengue / QC	_EESPLLIGQQSTVSDVPRDLEVVAATPTSLLISWDAPAVTVR_	P02751;P02751-15;P02751-3;P02751-7	0.948851	0.948851	1.07771e-12	6.64413e-12	108	P02751;P02751-15;P02751-3;P02751-7	FN1	Fibronectin;Isoform 15 of Fibronectin;Isoform 3 of Fibronectin;Isoform 7 of Fibronectin	FINC_HUMAN	1	93.0335	1.93033	Dengue	QC	NaN	NaN	NaN	50.6596	0.175399
Dengue / QC	_PGQAPVLVIYGK_	P01714	1.71565	1.71565	1.09574e-12	6.73302e-12	36	P01714	IGLV3-19	Immunoglobulin lambda variable 3-19	LV319_HUMAN	1	228.444	3.28444	Dengue	QC	NaN	NaN	NaN	23.6609	0.28794
Dengue / QC	_VTSTLTIKESDWLGQSMFTC[Carbamidomethyl (C)]R_	P01871	0.22225	0.22225	1.28106e-12	7.79488e-12	132	P01871	IGHM	Immunoglobulin heavy constant mu	IGHM_HUMAN	1	16.6551	1.16655	Dengue	QC	NaN	NaN	NaN	50.9392	0.381806
Dengue / QC	_SYLSMVGSC[Carbamidomethyl (C)]C[Carbamidomethyl (C)]TSASPTVC[Carbamidomethyl (C)]FLK_	P02774;P02774-3	0.492337	0.492337	1.3153e-12	7.98257e-12	114	P02774;P02774-3	GC	Vitamin D-binding protein;Isoform 3 of Vitamin D-binding protein	VTDB_HUMAN	1	40.6722	1.40672	Dengue	QC	NaN	NaN	NaN	101.203	0.0802956
Dengue / QC	_GDIGETGVPGAEGPR_	Q15848	0.577295	0.577295	1.32044e-12	7.99974e-12	104	Q15848	ADIPOQ	Adiponectin	ADIPO_HUMAN	1	49.2049	1.49205	Dengue	QC	NaN	NaN	NaN	63.745	0.0899572
Dengue / QC	_EDGGGWWYNR_	P02675	2.94921	2.94921	1.34105e-12	8.11584e-12	112	P02675	FGB	Fibrinogen beta chain	FIBB_HUMAN	1	672.325	7.72325	Dengue	QC	NaN	NaN	NaN	82.5878	0.328524
Dengue / QC	_RAPYPNYDRDILTIDIGR_	Q16610	0.943928	0.943928	1.51472e-12	9.12739e-12	90	Q16610	ECM1	Extracellular matrix protein 1	ECM1_HUMAN	1	92.3758	1.92376	Dengue	QC	NaN	NaN	NaN	81.2544	0.118571
Dengue / QC	_VLSLAQEQVGGSPEKLQETSNWLLSQQQADGSFQDPC[Carbamidomethyl (C)]PVLDR_	A0A140TA49	0.793906	0.793906	1.53153e-12	9.20891e-12	112	A0A140TA49	C4A	Complement C4-A	A0A140TA49_HUMAN	1	73.3762	1.73376	Dengue	QC	NaN	NaN	NaN	88.5446	0.129821
Dengue / QC	_VISTLEEPTPQC[Carbamidomethyl (C)]PTSQGR_	P09172	0.976906	0.976906	1.63693e-12	9.83208e-12	70	P09172	DBH	Dopamine beta-hydroxylase	DOPO_HUMAN	1	96.824	1.96824	Dengue	QC	NaN	NaN	NaN	36.9232	0.128093
Dengue / QC	_SRLLATLC[Carbamidomethyl (C)]SAEVC[Carbamidomethyl (C)]QC[Carbamidomethyl (C)]AEGK_	P0C0L5	2.07472	2.07472	1.66944e-12	1.00059e-11	96	P0C0L5	C4B	Complement C4-B	CO4B_HUMAN	1	321.264	4.21264	Dengue	QC	NaN	NaN	NaN	68.8345	0.263718
Dengue / QC	_TVAAPSVFIFPPSDEQLK[Methyl (KR)]SGTASVVC[Carbamidomethyl (C)]LLNNFYPR_	P01834	1.22082	1.22082	1.7333e-12	1.03665e-11	102	P01834	IGKC	Immunoglobulin kappa constant	IGKC_HUMAN	1	133.079	2.33079	Dengue	QC	NaN	NaN	NaN	85.6726	0.175932
Dengue / QC	_SVPSDIFQIQATTIYANTINTFR_	Q12805;Q12805-2;Q12805-4	1.23847	1.23847	1.77251e-12	1.0556e-11	76	Q12805;Q12805-2;Q12805-4	EFEMP1	EGF-containing fibulin-like extracellular matrix protein 1;Isoform 2 of EGF-containing fibulin-like extracellular matrix protein 1;Isoform 4 of EGF-containing fibulin-like extracellular matrix protein 1	FBLN3_HUMAN	1	135.948	2.35948	Dengue	QC	NaN	NaN	NaN	47.7832	0.183638
Dengue / QC	_GGETAQSADPQWEQLNNK_	P05546	0.53944	0.53944	1.82157e-12	1.08136e-11	94	P05546	SERPIND1	Heparin cofactor 2	HEP2_HUMAN	1	45.3408	1.45341	Dengue	QC	NaN	NaN	NaN	46.9995	0.0690981
Dengue / QC	_FTVDRPFLFLIYEHR_	P05546	1.00138	1.00138	1.83509e-12	1.08824e-11	140	P05546	SERPIND1	Heparin cofactor 2	HEP2_HUMAN	1	100.191	2.00191	Dengue	QC	NaN	NaN	NaN	83.0595	0.105242
Dengue / QC	_LLATLC[Carbamidomethyl (C)]SAEVC[Carbamidomethyl (C)]QC[Carbamidomethyl (C)]AEGKC[Carbamidomethyl (C)]PR_	P0C0L5	3.27042	3.27042	1.84406e-12	1.09179e-11	82	P0C0L5	C4B	Complement C4-B	CO4B_HUMAN	1	864.924	9.64924	Dengue	QC	NaN	NaN	NaN	54.0515	0.342301
Dengue / QC	_EWFWDLATGTMK_	P02790	1.10584	1.10584	1.87807e-12	1.1102e-11	122	P02790	HPX	Hemopexin	HEMO_HUMAN	1	115.224	2.15224	Dengue	QC	NaN	NaN	NaN	69.6598	0.117514
Dengue / QC	_EC[Carbamidomethyl (C)]EEIIRK_	P02675	6.40001	6.40001	1.88011e-12	1.11024e-11	24	P02675	FGB	Fibrinogen beta chain	FIBB_HUMAN	1	8344.91	84.4491	Dengue	QC	NaN	NaN	NaN	17.0088	0.26427
Dengue / QC	_SLLSNVEGDNAVPMQHNNRPTQPLK_	P00915	1.01391	1.01391	1.98255e-12	1.16581e-11	28	P00915	CA1	Carbonic anhydrase 1	CAH1_HUMAN	1	101.938	2.01938	Dengue	QC	NaN	NaN	NaN	21.7526	0.0661907
Dengue / QC	_LTIFKTELR_	P04114	1.17786	1.17786	2.05856e-12	1.20798e-11	138	P04114	APOB	Apolipoprotein B-100	APOB_HUMAN	1	126.241	2.26241	Dengue	QC	NaN	NaN	NaN	124.884	0.145239
Dengue / QC	_EMEDTLNHLK_	A6XND0;P17936;P17936-2	0.420521	0.420521	2.09996e-12	1.23098e-11	92	A6XND0;P17936;P17936-2	IGFBP3	Insulin-like growth factor-binding protein 3;Insulin-like growth factor-binding protein 3;Isoform 2 of Insulin-like growth factor-binding protein 3	A6XND0_HUMAN;IBP3_HUMAN;IBP3_HUMAN	1	33.8411	1.33841	Dengue	QC	NaN	NaN	NaN	61.3281	0.0759468
Dengue / QC	_AHYGGFTVQNEANKYQISVNKYR_	P02675	1.99251	1.99251	2.1368e-12	1.24866e-11	44	P02675	FGB	Fibrinogen beta chain	FIBB_HUMAN	1	297.929	3.97929	Dengue	QC	NaN	NaN	NaN	38.5393	0.199697
Dengue / QC	_LKHLIVTPSGC[Carbamidomethyl (C)]GEQNMIGMTPTVIAVHYLDETEQWEK_	P01024	0.72967	0.72967	2.21402e-12	1.29244e-11	110	P01024	C3	Complement C3	CO3_HUMAN	1	65.826	1.65826	Dengue	QC	NaN	NaN	NaN	53.4243	0.0718761
Dengue / QC	_NSLFFSAQPFEITASTNNEGNLK_	P04114	0.612813	0.612813	2.22089e-12	1.29509e-11	94	P04114	APOB	Apolipoprotein B-100	APOB_HUMAN	1	52.9238	1.52924	Dengue	QC	NaN	NaN	NaN	68.302	0.108047
Dengue / QC	_TAFISDFAVTADGNAFIGDIKDKVTAWK_	P19827	0.953505	0.953505	2.23976e-12	1.30474e-11	86	P19827	ITIH1	Inter-alpha-trypsin inhibitor heavy chain H1	ITIH1_HUMAN	1	93.6571	1.93657	Dengue	QC	NaN	NaN	NaN	57.0422	0.102377
Dengue / QC	_TLMFGSYLDDEKNWGLSFYADKPETTK_	P19652	0.575635	0.575635	2.31615e-12	1.34583e-11	162	P19652	ORM2	Alpha-1-acid glycoprotein 2	A1AG2_HUMAN	1	49.0333	1.49033	Dengue	QC	NaN	NaN	NaN	144.805	0.0777466
Dengue / QC	_ILDDLSPR_	Q14624	-0.508728	0.508728	2.32015e-12	1.34598e-11	176	Q14624	ITIH4	Inter-alpha-trypsin inhibitor heavy chain H4	ITIH4_HUMAN	1	-29.7158	0.702842	Dengue	QC	NaN	NaN	NaN	95.013	0.0629428
Dengue / QC	_LKAKLPDATPTELAK_	D6RF35	1.58191	1.58191	2.35422e-12	1.36433e-11	66	D6RF35	GC	Vitamin D-binding protein	D6RF35_HUMAN	1	199.367	2.99367	Dengue	QC	NaN	NaN	NaN	49.7091	0.145239
Dengue / QC	_NKC[Carbamidomethyl (C)]YTAVVPLVYGGETK_	P01591	2.84522	2.84522	2.41449e-12	1.39493e-11	62	P01591	JCHAIN	Immunoglobulin J chain	IGJ_HUMAN	1	618.617	7.18617	Dengue	QC	NaN	NaN	NaN	40.7152	0.261127
Dengue / QC	_VSVFVPPR_	P01871	-0.639903	0.639903	2.58065e-12	1.48328e-11	176	P01871	IGHM	Immunoglobulin heavy constant mu	IGHM_HUMAN	1	-35.8244	0.641756	Dengue	QC	NaN	NaN	NaN	104.182	0.0810567
Dengue / QC	_YEVSVYALKDTLTSRPAQGVVTTLENVSPPR_	P02751;P02751-15;P02751-3;P02751-7	2.05889	2.05889	2.58788e-12	1.48591e-11	38	P02751;P02751-15;P02751-3;P02751-7	FN1	Fibronectin;Isoform 15 of Fibronectin;Isoform 3 of Fibronectin;Isoform 7 of Fibronectin	FINC_HUMAN	1	316.664	4.16664	Dengue	QC	NaN	NaN	NaN	16.2645	0.128562
Dengue / QC	_YTHGHGSETLYLAPGGGDDWIYDLGIK_	A0A087WSY5;Q96IY4	0.932959	0.932959	2.66095e-12	1.52318e-11	138	A0A087WSY5;Q96IY4	CPB2	Carboxypeptidase B2	A0A087WSY5_HUMAN;CBPB2_HUMAN	1	90.9188	1.90919	Dengue	QC	NaN	NaN	NaN	115.315	0.0943806
Dengue / QC	_YVM[Oxidation (M)]LPVADQYDC[Carbamidomethyl (C)]ITHYEGSTC[Carbamidomethyl (C)]PK_	P00739	0.926258	0.926258	2.66443e-12	1.52362e-11	50	P00739	HPR	Haptoglobin-related protein	HPTR_HUMAN	1	90.034	1.90034	Dengue	QC	NaN	NaN	NaN	43.5863	0.174751
Dengue / QC	_EVGPPLPQEAVPLQK_	Q16610	1.09138	1.09138	2.72137e-12	1.55459e-11	52	Q16610	ECM1	Extracellular matrix protein 1	ECM1_HUMAN	1	113.077	2.13077	Dengue	QC	NaN	NaN	NaN	44.1487	0.159334
Dengue / QC	_NRNVHSGSTFFKYYLQGAK_	Q14624	1.86185	1.86185	3.21752e-12	1.81581e-11	48	Q14624	ITIH4	Inter-alpha-trypsin inhibitor heavy chain H4	ITIH4_HUMAN	1	263.473	3.63473	Dengue	QC	NaN	NaN	NaN	36.9071	0.184864
Dengue / QC	_DLLYIGK_	B4E1Z4	0.808221	0.808221	3.2472e-12	1.82888e-11	56	B4E1Z4	NaN	cDNA FLJ55673, highly similar to Complement factor B (EC 3.4.21.47)	B4E1Z4_HUMAN	1	75.1051	1.75105	Dengue	QC	NaN	NaN	NaN	40.692	0.103891
Dengue / QC	_MKGLIDEVNQDFTNRINK_	P02671	3.68394	3.68394	3.29377e-12	1.85324e-11	28	P02671	FGA	Fibrinogen alpha chain	FIBA_HUMAN	1	1185.21	12.8521	Dengue	QC	NaN	NaN	NaN	21.6812	0.194541
Dengue / QC	_VRAATVGSLAGQPLQER_	P02649	0.981269	0.981269	3.36635e-12	1.89218e-11	70	P02649	APOE	Apolipoprotein E	APOE_HUMAN	1	97.4201	1.9742	Dengue	QC	NaN	NaN	NaN	59.2493	0.127715
Dengue / QC	_GGETSEMYLIQPDSSVKPYR_	P02675	2.73496	2.73496	3.37593e-12	1.89566e-11	132	P02675	FGB	Fibrinogen beta chain	FIBB_HUMAN	1	565.739	6.65739	Dengue	QC	NaN	NaN	NaN	99.1237	0.323987
Dengue / QC	_NPNLPPETVDSLKNILTSNNIDVK_	P05090	0.678378	0.678378	3.38139e-12	1.89683e-11	134	P05090	APOD	Apolipoprotein D	APOD_HUMAN	1	60.0339	1.60034	Dengue	QC	NaN	NaN	NaN	120.131	0.0791907
Dengue / QC	_IQC[Carbamidomethyl (C)]AAGYEQSEHNVC[Carbamidomethyl (C)]QDIDEC[Carbamidomethyl (C)]TAGTHNC[Carbamidomethyl (C)]R_	Q12805;Q12805-2;Q12805-4	1.17034	1.17034	3.48039e-12	1.94846e-11	102	Q12805;Q12805-2;Q12805-4	EFEMP1	EGF-containing fibulin-like extracellular matrix protein 1;Isoform 2 of EGF-containing fibulin-like extracellular matrix protein 1;Isoform 4 of EGF-containing fibulin-like extracellular matrix protein 1	FBLN3_HUMAN	1	125.065	2.25065	Dengue	QC	NaN	NaN	NaN	88.8751	0.126955
Dengue / QC	_KKTDELPQLVTLPHPNLHGPEILDVPSTVQK_	P02751;P02751-15;P02751-3;P02751-7	0.65237	0.65237	3.6958e-12	2.06082e-11	132	P02751;P02751-15;P02751-3;P02751-7	FN1	Fibronectin;Isoform 15 of Fibronectin;Isoform 3 of Fibronectin;Isoform 7 of Fibronectin	FINC_HUMAN	1	57.1748	1.57175	Dengue	QC	NaN	NaN	NaN	102.59	0.0873206
Dengue / QC	_TPC[Carbamidomethyl (C)]TVSC[Carbamidomethyl (C)]NIPVVSGK_	P02675	2.72606	2.72606	3.70742e-12	2.0632e-11	128	P02675	FGB	Fibrinogen beta chain	FIBB_HUMAN	1	561.646	6.61646	Dengue	QC	NaN	NaN	NaN	97.8399	0.326375
Dengue / QC	_QDSLSSQNQLGVLPLSWDIPELVNMGQWK_	P01024	1.66111	1.66111	3.7445e-12	2.08177e-11	160	P01024	C3	Complement C3	CO3_HUMAN	1	216.259	3.16259	Dengue	QC	NaN	NaN	NaN	103.621	0.162289
Dengue / QC	_WDPYKQGFGNVATNTDGKNYC[Carbamidomethyl (C)]GLPGEYWLGNDK_	P02675	3.63344	3.63344	3.78218e-12	2.10063e-11	28	P02675	FGB	Fibrinogen beta chain	FIBB_HUMAN	1	1141	12.41	Dengue	QC	NaN	NaN	NaN	14.7638	0.149026
Dengue / QC	_SGKFTC[Carbamidomethyl (C)]KVPGLYYFTYHASSR_	D6R934;P02746	1.99475	1.99475	3.80755e-12	2.11263e-11	60	D6R934;P02746	C1QB	Complement C1q subcomponent subunit B	D6R934_HUMAN;C1QB_HUMAN	1	298.548	3.98548	Dengue	QC	NaN	NaN	NaN	44.9983	0.224493
Dengue / QC	_GTLSTTITGR_	P08519	1.22065	1.22065	3.81461e-12	2.11302e-11	114	P08519	LPA	Apolipoprotein(a)	APOA_HUMAN	1	133.052	2.33052	Dengue	QC	NaN	NaN	NaN	84.9356	0.154271
Dengue / QC	_INC[Carbamidomethyl (C)]QGKTYLFKGSQYWR_	P04004	2.19998	2.19998	3.81957e-12	2.11302e-11	52	P04004	VTN	Vitronectin	VTNC_HUMAN	1	359.474	4.59474	Dengue	QC	NaN	NaN	NaN	45.2182	0.193443
Dengue / QC	_SC[Carbamidomethyl (C)]ESNSPFPVHPGTAEC[Carbamidomethyl (C)]C[Carbamidomethyl (C)]TKEGLER_	P02774;P02774-3	2.76886	2.76886	4.03664e-12	2.22842e-11	128	P02774;P02774-3	GC	Vitamin D-binding protein;Isoform 3 of Vitamin D-binding protein	VTDB_HUMAN	1	581.567	6.81567	Dengue	QC	NaN	NaN	NaN	93.6812	0.301507
Dengue / QC	_GLIDEVNQDFTNR_	P02671	2.11141	2.11141	4.04011e-12	2.22842e-11	46	P02671	FGA	Fibrinogen alpha chain	FIBA_HUMAN	1	332.112	4.32112	Dengue	QC	NaN	NaN	NaN	33.8948	0.198676
Dengue / QC	_TSESGTPSSSTPQENTISGYSLLTC[Carbamidomethyl (C)]K_	H0YAC1;P03952	0.439275	0.439275	4.05436e-12	2.23408e-11	148	H0YAC1;P03952	KLKB1	Plasma kallikrein (Fragment);Plasma kallikrein	H0YAC1_HUMAN;KLKB1_HUMAN	1	35.5923	1.35592	Dengue	QC	NaN	NaN	NaN	108.198	0.0639221
Dengue / QC	_RVELKTPLGDTTHTC[Carbamidomethyl (C)]PR_	P01860	3.56933	3.56933	4.06685e-12	2.23876e-11	56	P01860	IGHG3	Immunoglobulin heavy constant gamma 3	IGHG3_HUMAN	1	1087.07	11.8707	Dengue	QC	NaN	NaN	NaN	36.4394	0.337803
Dengue / QC	_LSPIYNLVPVK_	P02748	-0.649749	0.649749	4.2475e-12	2.32224e-11	158	P02748	C9	Complement component C9	CO9_HUMAN	1	-36.2609	0.637391	Dengue	QC	NaN	NaN	NaN	93.7705	0.0793572
Dengue / QC	_EDFTSLSLVLYSR_	P02774;P02774-3	0.896664	0.896664	4.40215e-12	2.39744e-11	142	P02774;P02774-3	GC	Vitamin D-binding protein;Isoform 3 of Vitamin D-binding protein	VTDB_HUMAN	1	86.1755	1.86176	Dengue	QC	NaN	NaN	NaN	130.071	0.114434
Dengue / QC	_C[Carbamidomethyl (C)]NPGTGQC[Carbamidomethyl (C)]VC[Carbamidomethyl (C)]PAGWVGEQC[Carbamidomethyl (C)]QHC[Carbamidomethyl (C)]GGR_	O75882;O75882-2;O75882-3	1.10859	1.10859	4.62208e-12	2.51477e-11	122	O75882;O75882-2;O75882-3	ATRN	Attractin;Isoform 2 of Attractin;Isoform 3 of Attractin	ATRN_HUMAN	1	115.634	2.15634	Dengue	QC	NaN	NaN	NaN	83.2959	0.118258
Dengue / QC	_YPLYVLK_	A0A087WSY5;Q96IY4	0.978226	0.978226	4.70157e-12	2.55554e-11	48	A0A087WSY5;Q96IY4	CPB2	Carboxypeptidase B2	A0A087WSY5_HUMAN;CBPB2_HUMAN	1	97.0041	1.97004	Dengue	QC	NaN	NaN	NaN	40.215	0.0986608
Dengue / QC	_SDLGC[Carbamidomethyl (C)]GAGGGLNNANVFHLAGLTFLTNANADDSQENDEPC[Carbamidomethyl (C)]KEILRPR_	P01031	0.931998	0.931998	4.72565e-12	2.56614e-11	48	P01031	C5	Complement C5	CO5_HUMAN	1	90.7917	1.90792	Dengue	QC	NaN	NaN	NaN	41.6542	0.0912699
Dengue / QC	_LGNQEPGGQTALKSPPGVC[Carbamidomethyl (C)]SRDPTPEQTHR_	P08697	1.39592	1.39592	4.84565e-12	2.62621e-11	68	P08697	SERPINF2	Alpha-2-antiplasmin	A2AP_HUMAN	1	163.156	2.63156	Dengue	QC	NaN	NaN	NaN	59.9512	0.165842
Dengue / QC	_TEDTIFLR_	P19652	-0.578474	0.578474	5.03426e-12	2.72316e-11	174	P19652	ORM2	Alpha-1-acid glycoprotein 2	A1AG2_HUMAN	1	-33.0328	0.669672	Dengue	QC	NaN	NaN	NaN	101.689	0.0769485
Dengue / QC	_AQLVDMK_	P02671	2.76206	2.76206	5.64772e-12	3.02869e-11	142	P02671	FGA	Fibrinogen alpha chain	FIBA_HUMAN	1	578.362	6.78362	Dengue	QC	NaN	NaN	NaN	119.558	0.330177
Dengue / QC	_HGTDDGVVWMNWK_	P02675	3.3674	3.3674	5.81602e-12	3.11299e-11	110	P02675	FGB	Fibrinogen beta chain	FIBB_HUMAN	1	932.022	10.3202	Dengue	QC	NaN	NaN	NaN	78.7435	0.391463
Dengue / QC	_LFAC[Carbamidomethyl (C)]SNK_	P06396	0.923567	0.923567	6.02967e-12	3.22119e-11	98	P06396	GSN	Gelsolin	GELS_HUMAN	1	89.6799	1.8968	Dengue	QC	NaN	NaN	NaN	91.549	0.113334
Dengue / QC	_TLADLTLLDSPIK_	P04114	0.52622	0.52622	6.23219e-12	3.32304e-11	134	P04114	APOB	Apolipoprotein B-100	APOB_HUMAN	1	44.0151	1.44015	Dengue	QC	NaN	NaN	NaN	90.3852	0.071683
Dengue / QC	_FGMHFC[Carbamidomethyl (C)]GGTLISPEWVLTAAHC[Carbamidomethyl (C)]LEK_	P00747	0.667158	0.667158	6.45608e-12	3.42937e-11	160	P00747	PLG	Plasminogen	PLMN_HUMAN	1	58.7942	1.58794	Dengue	QC	NaN	NaN	NaN	103.491	0.0911255
Dengue / QC	_VLRENADSLQASLRPHADELK_	P06727	0.702197	0.702197	6.53722e-12	3.4659e-11	166	P06727	APOA4	Apolipoprotein A-IV	APOA4_HUMAN	1	62.698	1.62698	Dengue	QC	NaN	NaN	NaN	129.035	0.0881256
Dengue / QC	_LNTDIAGLASAIDMSTNYNSDSLHFSNVFR_	P04114	1.77154	1.77154	6.67264e-12	3.53435e-11	56	P04114	APOB	Apolipoprotein B-100	APOB_HUMAN	1	241.418	3.41418	Dengue	QC	NaN	NaN	NaN	23.5279	0.133432
Dengue / QC	_KVFLDC[Carbamidomethyl (C)]C[Carbamidomethyl (C)]NYITELRR_	P01024	0.75672	0.75672	6.79245e-12	3.59102e-11	66	P01024	C3	Complement C3	CO3_HUMAN	1	68.9644	1.68964	Dengue	QC	NaN	NaN	NaN	51.8762	0.0926524
Dengue / QC	_QNC[Carbamidomethyl (C)]ELFEQLGEYKFQNALLVR_	P02768	1.053	1.053	6.80481e-12	3.59417e-11	176	P02768	ALB	Serum albumin	ALBU_HUMAN	1	107.485	2.07485	Dengue	QC	NaN	NaN	NaN	161.325	0.13449
Dengue / QC	_LIVHNGYC[Carbamidomethyl (C)]DGRSER_	P02753;Q5VY30	3.07256	3.07256	7.19717e-12	3.79069e-11	62	P02753;Q5VY30	RBP4	Retinol-binding protein 4;Retinol binding protein 4, plasma, isoform CRA_b	RET4_HUMAN;Q5VY30_HUMAN	1	741.267	8.41267	Dengue	QC	NaN	NaN	NaN	44.9217	0.321819
Dengue / QC	_AQYVLISPEASSR_	P80108	0.34354	0.34354	7.2819e-12	3.83171e-11	168	P80108	GPLD1	Phosphatidylinositol-glycan-specific phospholipase D	PHLD_HUMAN	1	26.8866	1.26887	Dengue	QC	NaN	NaN	NaN	144.853	0.0555309
Dengue / QC	_SC[Carbamidomethyl (C)]DTPPPC[Carbamidomethyl (C)]PR[Dimethyl (KR)]C[Carbamidomethyl (C)]PAPELLGGPSVFLFPPKPK_	P01860	0.645726	0.645726	7.33474e-12	3.8559e-11	150	P01860	IGHG3	Immunoglobulin heavy constant gamma 3	IGHG3_HUMAN	1	56.4526	1.56453	Dengue	QC	NaN	NaN	NaN	79.9135	0.316308
Dengue / QC	_NVVFVIDKSGSMSGRK_	Q14624	1.70517	1.70517	7.35166e-12	3.86117e-11	52	Q14624	ITIH4	Inter-alpha-trypsin inhibitor heavy chain H4	ITIH4_HUMAN	1	226.067	3.26067	Dengue	QC	NaN	NaN	NaN	40.3222	0.189147
Dengue / QC	_APDVFPIISGC[Carbamidomethyl (C)]R_	A0A0A0MS09;P01880;P01880-2	1.45028	1.45028	7.51206e-12	3.94172e-11	52	A0A0A0MS09;P01880;P01880-2	IGHD	Immunoglobulin heavy constant delta (Fragment);Immunoglobulin heavy constant delta;Isoform 2 of Immunoglobulin heavy constant delta	A0A0A0MS09_HUMAN;IGHD_HUMAN;IGHD_HUMAN	1	173.261	2.73261	Dengue	QC	NaN	NaN	NaN	46.0473	0.192427
Dengue / QC	_NIQEYLSILTDPDGKGKEK_	P04114	1.16972	1.16972	7.59186e-12	3.97244e-11	50	P04114	APOB	Apolipoprotein B-100	APOB_HUMAN	1	124.968	2.24968	Dengue	QC	NaN	NaN	NaN	43.8233	0.138497
Dengue / QC	_ILGDMQPGDYFDLVLFGTR_	P19827	0.772089	0.772089	7.58719e-12	3.97244e-11	106	P19827	ITIH1	Inter-alpha-trypsin inhibitor heavy chain H1	ITIH1_HUMAN	1	70.774	1.70774	Dengue	QC	NaN	NaN	NaN	30.5609	0.0983584
Dengue / QC	_PGMPFDLMVFVTNPDGSPAYR_	P01024	1.08831	1.08831	7.59032e-12	3.97244e-11	52	P01024	C3	Complement C3	CO3_HUMAN	1	112.625	2.12625	Dengue	QC	NaN	NaN	NaN	43.6047	0.134434
Dengue / QC	_SMGGKEDLIWELLNQAQEHFGKDK_	P02787	0.723484	0.723484	7.6526e-12	4.00048e-11	176	P02787	TF	Serotransferrin	TRFE_HUMAN	1	65.1164	1.65116	Dengue	QC	NaN	NaN	NaN	167.451	0.101281
Dengue / QC	_GGMRKFIC[Carbamidomethyl (C)]PLTGLWPINTLK_	P02749	1.49451	1.49451	8.48208e-12	4.40534e-11	158	P02749	APOH	Beta-2-glycoprotein 1	APOH_HUMAN	1	181.769	2.81769	Dengue	QC	NaN	NaN	NaN	140.182	0.166706
Dengue / QC	_YK[Methyl (KR)]AAFTEC[Carbamidomethyl (C)]C[Carbamidomethyl (C)]QAADKAAC[Carbamidomethyl (C)]LLPK_	P02768	0.698842	0.698842	8.55531e-12	4.43105e-11	94	P02768	ALB	Serum albumin	ALBU_HUMAN	1	62.3201	1.6232	Dengue	QC	NaN	NaN	NaN	41.3757	0.370472
Dengue / QC	_GLMAALC[Carbamidomethyl (C)]PHKFPAIQNLALR_	P08571	0.782745	0.782745	9.04622e-12	4.66376e-11	106	P08571	CD14	Monocyte differentiation antigen CD14	CD14_HUMAN	1	72.0401	1.7204	Dengue	QC	NaN	NaN	NaN	82.8689	0.0906686
Dengue / QC	_GDMFLVANLGTK_	P43251;P43251-2;P43251-3;P43251-4	0.840059	0.840059	9.2924e-12	4.78627e-11	62	P43251;P43251-2;P43251-3;P43251-4	BTD	Biotinidase;Isoform 2 of Biotinidase;Isoform 3 of Biotinidase;Isoform 4 of Biotinidase	BTD_HUMAN	1	79.0123	1.79012	Dengue	QC	NaN	NaN	NaN	46.7796	0.0984923
Dengue / QC	_ESGMTMEELK_	P20851;P20851-2	1.08959	1.08959	9.45435e-12	4.86075e-11	36	P20851;P20851-2	C4BPB	C4b-binding protein beta chain;Isoform 2 of C4b-binding protein beta chain	C4BPB_HUMAN	1	112.814	2.12814	Dengue	QC	NaN	NaN	NaN	28.369	0.09436
Dengue / QC	_YVTSAPMPEPQAPGR_	P01871	-0.606234	0.606234	9.60267e-12	4.93248e-11	176	P01871	IGHM	Immunoglobulin heavy constant mu	IGHM_HUMAN	1	-34.3091	0.656909	Dengue	QC	NaN	NaN	NaN	80.4276	0.0738647
Dengue / QC	_FTIYNNMFC[Carbamidomethyl (C)]AGFHEGGR_	P00740	0.839096	0.839096	9.88164e-12	5.07113e-11	72	P00740	F9	Coagulation factor IX	FA9_HUMAN	1	78.8928	1.78893	Dengue	QC	NaN	NaN	NaN	61.3199	0.0817106
Dengue / QC	_IVSSAMEPDR_	P08603	0.549419	0.549419	1.09698e-11	5.60389e-11	66	P08603	CFH	Complement factor H	CFAH_HUMAN	1	46.3496	1.4635	Dengue	QC	NaN	NaN	NaN	28.2945	0.11989
Dengue / QC	_SQDILLSVENTVIYR_	P07225	0.912219	0.912219	1.11353e-11	5.67811e-11	112	P07225	PROS1	Vitamin K-dependent protein S	PROS_HUMAN	1	88.1937	1.88194	Dengue	QC	NaN	NaN	NaN	91.9992	0.11948
Dengue / QC	_GQPREPQVYTLPPSQEEMTK[Dimethyl (KR)]NQVSLTC[Carbamidomethyl (C)]LVK_	P01861	3.2431	3.2431	1.12676e-11	5.73514e-11	78	P01861	IGHG4	Immunoglobulin heavy constant gamma 4	IGHG4_HUMAN	1	846.827	9.46827	Dengue	QC	NaN	NaN	NaN	52.0599	0.397911
Dengue / QC	_LR[Dimethyl (KR)]SDDTAVYYC[Carbamidomethyl (C)]AR_	P23083	0.941882	0.941882	1.14849e-11	5.82984e-11	110	P23083	IGHV1-2	Immunoglobulin heavy variable 1-2	HV102_HUMAN	1	92.1033	1.92103	Dengue	QC	NaN	NaN	NaN	50.9152	0.35211
Dengue / QC	_GFPSVLR_	P01871	-0.653793	0.653793	1.2354e-11	6.25401e-11	176	P01871	IGHM	Immunoglobulin heavy constant mu	IGHM_HUMAN	1	-36.4393	0.635607	Dengue	QC	NaN	NaN	NaN	89.3775	0.0807921
Dengue / QC	_FVTWIEGVMR_	P00747	0.321156	0.321156	1.2381e-11	6.26105e-11	132	P00747	PLG	Plasminogen	PLMN_HUMAN	1	24.9331	1.24933	Dengue	QC	NaN	NaN	NaN	101.643	0.0927418
Dengue / QC	_LYLQMSTHGK_	A0A0C4DFP6;Q9NQ79;Q9NQ79-2	1.29384	1.29384	1.23903e-11	6.26105e-11	40	A0A0C4DFP6;Q9NQ79;Q9NQ79-2	CRTAC1	Cartilage acidic protein 1;Cartilage acidic protein 1;Isoform 2 of Cartilage acidic protein 1	A0A0C4DFP6_HUMAN;CRAC1_HUMAN;CRAC1_HUMAN	1	145.18	2.4518	Dengue	QC	NaN	NaN	NaN	28.8217	0.11775
Dengue / QC	_RLEVDIDIK_	P02671	3.39622	3.39622	1.29227e-11	6.51833e-11	58	P02671	FGA	Fibrinogen alpha chain	FIBA_HUMAN	1	952.841	10.5284	Dengue	QC	NaN	NaN	NaN	42.8809	0.346355
Dengue / QC	_FYYLIASETPGK_	P29622	0.394866	0.394866	1.40928e-11	7.07672e-11	62	P29622	SERPINA4	Kallistatin	KAIN_HUMAN	1	31.4821	1.31482	Dengue	QC	NaN	NaN	NaN	43.3528	0.093707
Dengue / QC	_QGFGNVATNTDGKNYC[Carbamidomethyl (C)]GLPGEYWLGNDKISQLTR_	P02675	2.03031	2.03031	1.48129e-11	7.425e-11	34	P02675	FGB	Fibrinogen beta chain	FIBB_HUMAN	1	308.494	4.08494	Dengue	QC	NaN	NaN	NaN	26.5976	0.183073
Dengue / QC	_TMFIGGSQLSQK_	P80108	1.12121	1.12121	1.49771e-11	7.49389e-11	26	P80108	GPLD1	Phosphatidylinositol-glycan-specific phospholipase D	PHLD_HUMAN	1	117.53	2.1753	Dengue	QC	NaN	NaN	NaN	21.5571	0.110047
Dengue / QC	_SYTVAIAGYALAQMGRLKGPLLNK_	P01024	0.80827	0.80827	1.52377e-11	7.60394e-11	120	P01024	C3	Complement C3	CO3_HUMAN	1	75.111	1.75111	Dengue	QC	NaN	NaN	NaN	89.1003	0.0930951
Dengue / QC	_SGVQM[Oxidation (M)]NTNFFHESGLEAHVALK_	P04114	0.228254	0.228254	1.62154e-11	8.06308e-11	38	P04114	APOB	Apolipoprotein B-100	APOB_HUMAN	1	17.1416	1.17142	Dengue	QC	NaN	NaN	NaN	26.7051	0.0684748
Dengue / QC	_NYC[Carbamidomethyl (C)]GLPGEYWLGNDK_	P02675	2.22801	2.22801	1.6625e-11	8.25946e-11	80	P02675	FGB	Fibrinogen beta chain	FIBB_HUMAN	1	368.486	4.68486	Dengue	QC	NaN	NaN	NaN	66.4805	0.260022
Dengue / QC	_WTGRPTC[Carbamidomethyl (C)]RDTSC[Carbamidomethyl (C)]VNPPTVQNAYIVSR_	P08603	4.06032	4.06032	1.66519e-11	8.26546e-11	28	P08603	CFH	Complement factor H	CFAH_HUMAN	1	1568.32	16.6832	Dengue	QC	NaN	NaN	NaN	18.4361	0.269233
Dengue / QC	_LTVSIEAR_	P22792	0.498115	0.498115	1.67419e-11	8.30282e-11	156	P22792	CPN2	Carboxypeptidase N subunit 2	CPN2_HUMAN	1	41.2367	1.41237	Dengue	QC	NaN	NaN	NaN	128.573	0.0709384
Dengue / QC	_IRPFFPQQ_	P02675	3.03959	3.03959	1.68983e-11	8.36557e-11	152	P02675	FGB	Fibrinogen beta chain	FIBB_HUMAN	1	722.257	8.22257	Dengue	QC	NaN	NaN	NaN	119.852	0.377095
Dengue / QC	_GNLLQC[Carbamidomethyl (C)]IC[Carbamidomethyl (C)]TGNGRGEWK_	P02751;P02751-15;P02751-3;P02751-7	1.71442	1.71442	1.69587e-11	8.38805e-11	44	P02751;P02751-15;P02751-3;P02751-7	FN1	Fibronectin;Isoform 15 of Fibronectin;Isoform 3 of Fibronectin;Isoform 7 of Fibronectin	FINC_HUMAN	1	228.164	3.28164	Dengue	QC	NaN	NaN	NaN	38.1657	0.178839
Dengue / QC	_WNPEVDC[Carbamidomethyl (C)]TEKR_	Q9BXR6	0.745663	0.745663	1.80798e-11	8.9113e-11	32	Q9BXR6	CFHR5	Complement factor H-related protein 5	FHR5_HUMAN	1	67.6745	1.67674	Dengue	QC	NaN	NaN	NaN	26.1548	0.181536
Dengue / QC	_NTDEDKWGDAC[Carbamidomethyl (C)]DNC[Carbamidomethyl (C)]R_	G3XAP6;P49747	1.80245	1.80245	1.80802e-11	8.9113e-11	56	G3XAP6;P49747	COMP	Cartilage oligomeric matrix protein	G3XAP6_HUMAN;COMP_HUMAN	1	248.811	3.48811	Dengue	QC	NaN	NaN	NaN	47.4518	0.247593
Dengue / QC	_VELEDWNGR_	P02679;P02679-2	2.77578	2.77578	1.84783e-11	9.09154e-11	118	P02679;P02679-2	FGG	Fibrinogen gamma chain;Isoform Gamma-A of Fibrinogen gamma chain	FIBG_HUMAN	1	584.845	6.84845	Dengue	QC	NaN	NaN	NaN	82.11	0.327878
Dengue / QC	_HSITNPLAVLC[Carbamidomethyl (C)]EFISQSIK_	P04114	1.23653	1.23653	1.85116e-11	9.09989e-11	72	P04114	APOB	Apolipoprotein B-100	APOB_HUMAN	1	135.63	2.3563	Dengue	QC	NaN	NaN	NaN	63.0882	0.151991
Dengue / QC	_SILQM[Oxidation (M)]SLDHHIVTPLTSLVIENEAGDER_	P19823	1.43079	1.43079	1.90615e-11	9.3538e-11	110	P19823	ITIH2	Inter-alpha-trypsin inhibitor heavy chain H2	ITIH2_HUMAN	1	169.594	2.69594	Dengue	QC	NaN	NaN	NaN	85.9795	0.167908
Dengue / QC	_FTC[Carbamidomethyl (C)]TVTHTDLPSPLK_	P01871	-0.538877	0.538877	1.94534e-11	9.53777e-11	176	P01871	IGHM	Immunoglobulin heavy constant mu	IGHM_HUMAN	1	-31.1694	0.688306	Dengue	QC	NaN	NaN	NaN	103.64	0.0668672
Dengue / QC	_VWVYPPEK_	P02790	1.14085	1.14085	1.95507e-11	9.57709e-11	62	P02790	HPX	Hemopexin	HEMO_HUMAN	1	120.511	2.20511	Dengue	QC	NaN	NaN	NaN	54.2477	0.154584
Dengue / QC	_DTLM[Oxidation (M)]ISRTPEVTC[Carbamidomethyl (C)]VVVDVSHEDPEVK_	P01857	-0.210614	0.210614	1.96649e-11	9.62462e-11	154	P01857	IGHG1	Immunoglobulin heavy constant gamma 1	IGHG1_HUMAN	1	-13.583	0.86417	Dengue	QC	NaN	NaN	NaN	75.2052	0.754537
Dengue / QC	_ASC[Carbamidomethyl (C)]K[Methyl (KR)]VPVK_	P02749	2.36983	2.36983	2.05099e-11	1.0012e-10	46	P02749	APOH	Beta-2-glycoprotein 1	APOH_HUMAN	1	416.88	5.1688	Dengue	QC	NaN	NaN	NaN	40.8431	0.269618
Dengue / QC	_TIVTTLQDSIR_	P07996	0.630906	0.630906	2.1527e-11	1.04448e-10	94	P07996	THBS1	Thrombospondin-1	TSP1_HUMAN	1	54.8537	1.54854	Dengue	QC	NaN	NaN	NaN	80.5356	0.096728
Dengue / QC	_TVAAPSVFIFPPSDEQLK[Dimethyl (KR)]SGTASVVC[Carbamidomethyl (C)]LLNNFYPR_	P01834	1.22041	1.22041	2.26193e-11	1.09464e-10	174	P01834	IGKC	Immunoglobulin kappa constant	IGKC_HUMAN	1	133.013	2.33013	Dengue	QC	NaN	NaN	NaN	97.1358	0.163391
Dengue / QC	_DKVTAWK_	P19827	1.17968	1.17968	2.28565e-11	1.10516e-10	44	P19827	ITIH1	Inter-alpha-trypsin inhibitor heavy chain H1	ITIH1_HUMAN	1	126.526	2.26526	Dengue	QC	NaN	NaN	NaN	39.6006	0.135499
Dengue / QC	_M[Oxidation (M)]YYSAVEPTKDIFTGLIGPMK_	E9PFZ2	-0.120318	0.120318	2.32634e-11	1.12289e-10	92	E9PFZ2	CP	Ceruloplasmin	E9PFZ2_HUMAN	1	-8.00153	0.919985	Dengue	QC	NaN	NaN	NaN	51.7554	0.206138
Dengue / QC	_C[Carbamidomethyl (C)]NLLAEKQYGFC[Carbamidomethyl (C)]K_	P02765	1.89761	1.89761	2.42826e-11	1.17007e-10	144	P02765	AHSG	Alpha-2-HS-glycoprotein	FETUA_HUMAN	1	272.594	3.72594	Dengue	QC	NaN	NaN	NaN	111.746	0.235093
Dengue / QC	_YTTEIIKC[Carbamidomethyl (C)]PQPK_	B4DPQ0	2.33164	2.33164	2.52824e-11	1.21512e-10	100	B4DPQ0	C1R	Complement C1r subcomponent	B4DPQ0_HUMAN	1	403.376	5.03376	Dengue	QC	NaN	NaN	NaN	70.5343	0.233362
Dengue / QC	_GSWYSMRK_	P02675	2.71526	2.71526	2.57196e-11	1.23401e-10	38	P02675	FGB	Fibrinogen beta chain	FIBB_HUMAN	1	556.71	6.5671	Dengue	QC	NaN	NaN	NaN	29.5062	0.247144
Dengue / QC	_C[Carbamidomethyl (C)]ENTDPGYNC[Carbamidomethyl (C)]LPC[Carbamidomethyl (C)]PPR_	P07996	0.606796	0.606796	2.62073e-11	1.25633e-10	30	P07996	THBS1	Thrombospondin-1	TSP1_HUMAN	1	52.2873	1.52287	Dengue	QC	NaN	NaN	NaN	21.6807	0.153697
Dengue / QC	_SRLSSGLVTAALYGR_	P43251;P43251-2;P43251-3;P43251-4	0.492646	0.492646	2.7612e-11	1.32141e-10	122	P43251;P43251-2;P43251-3;P43251-4	BTD	Biotinidase;Isoform 2 of Biotinidase;Isoform 3 of Biotinidase;Isoform 4 of Biotinidase	BTD_HUMAN	1	40.7024	1.40702	Dengue	QC	NaN	NaN	NaN	101.295	0.120146
Dengue / QC	_DVVLTTTFVDDIK_	P02748	0.578889	0.578889	2.81237e-11	1.34361e-10	148	P02748	C9	Complement component C9	CO9_HUMAN	1	49.3698	1.4937	Dengue	QC	NaN	NaN	NaN	113.858	0.0779953
Dengue / QC	_TC[Carbamidomethyl (C)]QDINEC[Carbamidomethyl (C)]ETTNEC[Carbamidomethyl (C)]REDEMC[Carbamidomethyl (C)]WNYHGGFR_	Q12805;Q12805-2;Q12805-4	2.25563	2.25563	2.84e-11	1.35565e-10	22	Q12805;Q12805-2;Q12805-4	EFEMP1	EGF-containing fibulin-like extracellular matrix protein 1;Isoform 2 of EGF-containing fibulin-like extracellular matrix protein 1;Isoform 4 of EGF-containing fibulin-like extracellular matrix protein 1	FBLN3_HUMAN	1	377.541	4.77541	Dengue	QC	NaN	NaN	NaN	16.2674	0.139617
Dengue / QC	_VADALTNAVAHVDDMPNALSALSDLHAHKLR_	P69905	1.49803	1.49803	2.92716e-11	1.39488e-10	80	P69905	HBA1	Hemoglobin subunit alpha	HBA_HUMAN	1	182.457	2.82457	Dengue	QC	NaN	NaN	NaN	59.4411	0.117229
Dengue / QC	_VAQLEAQC[Carbamidomethyl (C)]QEPC[Carbamidomethyl (C)]KDTVQIHDITGKDC[Carbamidomethyl (C)]QDIANK_	P02679;P02679-2	2.39312	2.39312	3.01496e-11	1.43307e-10	34	P02679;P02679-2	FGG	Fibrinogen gamma chain;Isoform Gamma-A of Fibrinogen gamma chain	FIBG_HUMAN	1	425.292	5.25292	Dengue	QC	NaN	NaN	NaN	28.9125	0.202954
Dengue / QC	_KMEILHPGK_	P13671	2.57998	2.57998	3.211e-11	1.52037e-10	68	P13671	C6	Complement component C6	CO6_HUMAN	1	497.931	5.97931	Dengue	QC	NaN	NaN	NaN	54.0081	0.299338
Dengue / QC	_DNC[Carbamidomethyl (C)]C[Carbamidomethyl (C)]ILDER_	P02679;P02679-2	2.9851	2.9851	3.21221e-11	1.52037e-10	142	P02679;P02679-2	FGG	Fibrinogen gamma chain;Isoform Gamma-A of Fibrinogen gamma chain	FIBG_HUMAN	1	691.782	7.91782	Dengue	QC	NaN	NaN	NaN	111.474	0.370045
Dengue / QC	_LWLEGNPWDC[Carbamidomethyl (C)]GC[Carbamidomethyl (C)]PLK_	P35858;P35858-2	0.503333	0.503333	3.32213e-11	1.56975e-10	128	P35858;P35858-2	IGFALS	Insulin-like growth factor-binding protein complex acid labile subunit;Isoform 2 of Insulin-like growth factor-binding protein complex acid labile subunit	ALS_HUMAN	1	41.7485	1.41748	Dengue	QC	NaN	NaN	NaN	113.411	0.0778417
Dengue / QC	_QLYNVEATSYALLALLQLK_	P01024	0.593963	0.593963	3.3917e-11	1.59723e-10	30	P01024	C3	Complement C3	CO3_HUMAN	1	50.9388	1.50939	Dengue	QC	NaN	NaN	NaN	24.6398	0.0893445
Dengue / QC	_SLIYAASSLQSGVPSK[Methyl (KR)]_	P04430	1.34079	1.34079	3.41316e-11	1.60464e-10	56	P04430	IGKV1-16	Immunoglobulin kappa variable 1-16	KV116_HUMAN	1	153.291	2.53291	Dengue	QC	NaN	NaN	NaN	40.5469	0.142072
Dengue / QC	_C[Carbamidomethyl (C)]LLFSFLPASSINDMEKR_	H0YAC1;P03952	0.547217	0.547217	3.43636e-11	1.6142e-10	130	H0YAC1;P03952	KLKB1	Plasma kallikrein (Fragment);Plasma kallikrein	H0YAC1_HUMAN;KLKB1_HUMAN	1	46.1265	1.46126	Dengue	QC	NaN	NaN	NaN	91.5652	0.0965538
Dengue / QC	_DNENVVNEYSSELEK_	P02675	2.39735	2.39735	3.5696e-11	1.667e-10	116	P02675	FGB	Fibrinogen beta chain	FIBB_HUMAN	1	426.834	5.26834	Dengue	QC	NaN	NaN	NaN	86.5691	0.332904
Dengue / QC	_IDQTVEELR_	P06727	1.73638	1.73638	3.69141e-11	1.71816e-10	70	P06727	APOA4	Apolipoprotein A-IV	APOA4_HUMAN	1	233.199	3.33199	Dengue	QC	NaN	NaN	NaN	55.3616	0.168531
Dengue / QC	_VTFHNKGAYPLSIEPIGVR_	P00450	1.4686	1.4686	3.72539e-11	1.73254e-10	136	P00450	CP	Ceruloplasmin	CERU_HUMAN	1	176.753	2.76753	Dengue	QC	NaN	NaN	NaN	108.453	0.182603
Dengue / QC	_SILQMSLDHHIVTPLTSLVIENEAGDER_	P19823	0.644449	0.644449	3.76334e-11	1.74729e-10	176	P19823	ITIH2	Inter-alpha-trypsin inhibitor heavy chain H2	ITIH2_HUMAN	1	56.3142	1.56314	Dengue	QC	NaN	NaN	NaN	150.28	0.0873805
Dengue / QC	_ASSIIDELFQDRFFTR_	P10909;P10909-2;P10909-4;P10909-5	0.871903	0.871903	3.89059e-11	1.79743e-10	154	P10909;P10909-2;P10909-4;P10909-5	CLU	Clusterin;Isoform 2 of Clusterin;Isoform 4 of Clusterin;Isoform 5 of Clusterin	CLUS_HUMAN	1	83.0075	1.83008	Dengue	QC	NaN	NaN	NaN	91.9223	0.126972
Dengue / QC	_HTASAWLM[Oxidation (M)]SAPNSGPHNR_	Q96PD5	0.512221	0.512221	3.95135e-11	1.8225e-10	38	Q96PD5	PGLYRP2	N-acetylmuramoyl-L-alanine amidase	PGRP2_HUMAN	1	42.6244	1.42624	Dengue	QC	NaN	NaN	NaN	13.8833	0.367627
Dengue / QC	_HSTFIPGTNK_	P08519	1.37568	1.37568	4.20805e-11	1.93453e-10	54	P08519	LPA	Apolipoprotein(a)	APOA_HUMAN	1	159.491	2.59491	Dengue	QC	NaN	NaN	NaN	46.2233	0.153117
Dengue / QC	_KLWAYLTINQLLAER_	P19823	0.759096	0.759096	4.29756e-11	1.96922e-10	158	P19823	ITIH2	Inter-alpha-trypsin inhibitor heavy chain H2	ITIH2_HUMAN	1	69.2429	1.69243	Dengue	QC	NaN	NaN	NaN	124.736	0.108105
Dengue / QC	_DC[Carbamidomethyl (C)]NTC[Carbamidomethyl (C)]IC[Carbamidomethyl (C)]R_	P04275	1.73089	1.73089	4.44841e-11	2.03004e-10	38	P04275	VWF	von Willebrand factor	VWF_HUMAN	1	231.933	3.31933	Dengue	QC	NaN	NaN	NaN	31.9639	0.177289
Dengue / QC	_LTLQGIISWGSGC[Carbamidomethyl (C)]GDR_	P00748	1.88086	1.88086	4.47867e-11	2.04218e-10	40	P00748	F12	Coagulation factor XII	FA12_HUMAN	1	268.295	3.68295	Dengue	QC	NaN	NaN	NaN	34.034	0.163817
Dengue / QC	_DYNLNDILLQLGIEEAFTSK_	P01011	1.50585	1.50585	4.56947e-11	2.0819e-10	136	P01011	SERPINA3	Alpha-1-antichymotrypsin	AACT_HUMAN	1	183.991	2.83991	Dengue	QC	NaN	NaN	NaN	64.1055	0.171449
Dengue / QC	_NIEKISMLEK_	P00734	3.18674	3.18674	4.60249e-11	2.09353e-10	22	P00734	F2	Prothrombin	THRB_HUMAN	1	810.549	9.10549	Dengue	QC	NaN	NaN	NaN	16.3783	0.209261
Dengue / QC	_APQLRETLLQDFR_	P02760	1.30036	1.30036	4.64598e-11	2.10989e-10	42	P02760	AMBP	Protein AMBP	AMBP_HUMAN	1	146.29	2.4629	Dengue	QC	NaN	NaN	NaN	29.0619	0.140552
Dengue / QC	_YLQEIYNSNNQK_	P02679;P02679-2	1.67154	1.67154	4.6605e-11	2.11477e-10	110	P02679;P02679-2	FGG	Fibrinogen gamma chain;Isoform Gamma-A of Fibrinogen gamma chain	FIBG_HUMAN	1	218.555	3.18555	Dengue	QC	NaN	NaN	NaN	91.8093	0.206381
Dengue / QC	_AIFYMNNPSR_	Q9UGM5	0.584777	0.584777	4.70738e-11	2.13087e-10	74	Q9UGM5	FETUB	Fetuin-B	FETUB_HUMAN	1	49.9807	1.49981	Dengue	QC	NaN	NaN	NaN	63.9164	0.0670344
Dengue / QC	_YAATSQVLLPSK[Methyl (KR)]DVMQGTDEHVVC[Carbamidomethyl (C)]K_	P01871	2.25345	2.25345	4.71812e-11	2.13401e-10	56	P01871	IGHM	Immunoglobulin heavy constant mu	IGHM_HUMAN	1	376.823	4.76823	Dengue	QC	NaN	NaN	NaN	22.634	0.181725
Dengue / QC	_ALTDMPQMR_	P02671	3.22426	3.22426	4.8007e-11	2.16961e-10	150	P02671	FGA	Fibrinogen alpha chain	FIBA_HUMAN	1	834.545	9.34545	Dengue	QC	NaN	NaN	NaN	113.064	0.409911
Dengue / QC	_FFTREPQDTYHYLPFSLPHR_	P10909;P10909-2;P10909-4;P10909-5	0.757878	0.757878	4.80956e-11	2.17186e-10	84	P10909;P10909-2;P10909-4;P10909-5	CLU	Clusterin;Isoform 2 of Clusterin;Isoform 4 of Clusterin;Isoform 5 of Clusterin	CLUS_HUMAN	1	69.1002	1.691	Dengue	QC	NaN	NaN	NaN	77.8124	0.0936388
Dengue / QC	_TVIGPDGHKEVTK_	P02671	3.01813	3.01813	4.82409e-11	2.17667e-10	78	P02671	FGA	Fibrinogen alpha chain	FIBA_HUMAN	1	710.114	8.10114	Dengue	QC	NaN	NaN	NaN	56.4796	0.354403
Dengue / QC	_QSSGENC[Carbamidomethyl (C)]DVVVNTLGK_	P01833	1.57993	1.57993	4.82847e-11	2.17689e-10	96	P01833	PIGR	Polymeric immunoglobulin receptor	PIGR_HUMAN	1	198.955	2.98955	Dengue	QC	NaN	NaN	NaN	72.3412	0.21192
Dengue / QC	_SM[Oxidation (M)]GGKEDLIWELLNQAQEHFGK_	P02787	1.00171	1.00171	5.21751e-11	2.34474e-10	140	P02787	TF	Serotransferrin	TRFE_HUMAN	1	100.237	2.00237	Dengue	QC	NaN	NaN	NaN	134.762	0.122013
Dengue / QC	_SRDKGQAGLQR_	P0C0L5	1.68362	1.68362	5.27343e-11	2.36608e-10	42	P0C0L5	C4B	Complement C4-B	CO4B_HUMAN	1	221.234	3.21234	Dengue	QC	NaN	NaN	NaN	37.6497	0.14719
Dengue / QC	_LVTSKGDKELR_	P02671	2.95647	2.95647	5.35002e-11	2.39852e-10	136	P02671	FGA	Fibrinogen alpha chain	FIBA_HUMAN	1	676.223	7.76223	Dengue	QC	NaN	NaN	NaN	104.499	0.374764
Dengue / QC	_VALIC[Carbamidomethyl (C)]LPPEWYVVPPGTK_	G3XAK1;P26927	1.65329	1.65329	5.56431e-11	2.4807e-10	14	G3XAK1;P26927	MST1	Hepatocyte growth factor-like protein	G3XAK1_HUMAN;HGFL_HUMAN	1	214.55	3.1455	Dengue	QC	NaN	NaN	NaN	7.86046	0.128694
Dengue / QC	_SMGGKEDLIWELLNQAQEHFGK_	P02787	0.975889	0.975889	5.9889e-11	2.65101e-10	172	P02787	TF	Serotransferrin	TRFE_HUMAN	1	96.6853	1.96685	Dengue	QC	NaN	NaN	NaN	115.056	0.168209
Dengue / QC	_LFGEVTSPLFPKPYPNNFETTTVITVPTGYR_	B4DPQ0	0.831885	0.831885	6.13651e-11	2.71421e-10	106	B4DPQ0	C1R	Complement C1r subcomponent	B4DPQ0_HUMAN	1	78.001	1.78001	Dengue	QC	NaN	NaN	NaN	73.3144	0.109192
Dengue / QC	_LDGSVDFKK_	P02679;P02679-2	3.19314	3.19314	6.19298e-11	2.73487e-10	22	P02679;P02679-2	FGG	Fibrinogen gamma chain;Isoform Gamma-A of Fibrinogen gamma chain	FIBG_HUMAN	1	814.598	9.14598	Dengue	QC	NaN	NaN	NaN	16.4716	0.182943
Dengue / QC	_QLSLPETGELDSATLK_	P14780	0.797715	0.797715	6.25694e-11	2.76094e-10	48	P14780	MMP9	Matrix metalloproteinase-9	MMP9_HUMAN	1	73.8346	1.73835	Dengue	QC	NaN	NaN	NaN	34.5602	0.129329
Dengue / QC	_NPDGDVGGPWC[Carbamidomethyl (C)]YTTNPRK_	P00747	1.77911	1.77911	6.60627e-11	2.8991e-10	50	P00747	PLG	Plasminogen	PLMN_HUMAN	1	243.213	3.43213	Dengue	QC	NaN	NaN	NaN	33.9907	0.188671
Dengue / QC	_VINLPLDSMAAPWETGDTFPDVVAIAPDVR_	Q96PD5	0.720743	0.720743	6.60624e-11	2.8991e-10	128	Q96PD5	PGLYRP2	N-acetylmuramoyl-L-alanine amidase	PGRP2_HUMAN	1	64.8031	1.64803	Dengue	QC	NaN	NaN	NaN	111.004	0.0926805
Dengue / QC	_VMPIC[Carbamidomethyl (C)]LPSKNYAEVGR_	P00739	1.09847	1.09847	6.72475e-11	2.94648e-10	136	P00739	HPR	Haptoglobin-related protein	HPTR_HUMAN	1	114.128	2.14128	Dengue	QC	NaN	NaN	NaN	115.893	0.139499
Dengue / QC	_YKPFSQVPTGEVFYYSC[Carbamidomethyl (C)]EYNFVSPSK_	Q03591	0.721673	0.721673	6.79369e-11	2.97204e-10	110	Q03591	CFHR1	Complement factor H-related protein 1	FHR1_HUMAN	1	64.9093	1.64909	Dengue	QC	NaN	NaN	NaN	98.9788	0.0991304
Dengue / QC	_MLQITNTGFEMK_	P20742	2.6834	2.6834	7.04458e-11	3.06981e-10	70	P20742	PZP	Pregnancy zone protein	PZP_HUMAN	1	542.367	6.42367	Dengue	QC	NaN	NaN	NaN	45.3667	0.285399
Dengue / QC	_VQQNVPSGTDTGDPQSKPLGDWAAGTMDPESSIFIEDAIK_	O14791;O14791-2	0.785216	0.785216	7.24199e-11	3.15339e-10	82	O14791;O14791-2	APOL1	Apolipoprotein L1;Isoform 2 of Apolipoprotein L1	APOL1_HUMAN	1	72.3351	1.72335	Dengue	QC	NaN	NaN	NaN	53.0346	0.10461
Dengue / QC	_TVIGPDGHK_	P02671	1.35255	1.35255	7.4987e-11	3.2601e-10	112	P02671	FGA	Fibrinogen alpha chain	FIBA_HUMAN	1	155.363	2.55363	Dengue	QC	NaN	NaN	NaN	97.0396	0.23771
Dengue / QC	_MGPTELLIEMEDWKGDKVK_	P02675	4.30731	4.30731	7.61831e-11	3.30953e-10	34	P02675	FGB	Fibrinogen beta chain	FIBB_HUMAN	1	1879.84	19.7984	Dengue	QC	NaN	NaN	NaN	24.8286	0.273763
Dengue / QC	_ITFELVYEELLK_	Q14624	0.69135	0.69135	8.16307e-11	3.53796e-10	148	Q14624	ITIH4	Inter-alpha-trypsin inhibitor heavy chain H4	ITIH4_HUMAN	1	61.4794	1.61479	Dengue	QC	NaN	NaN	NaN	83.4407	0.133458
Dengue / QC	_DGEKVSVLC[Carbamidomethyl (C)]QENYLIQEGEEITC[Carbamidomethyl (C)]KDGR_	P08603	1.3421	1.3421	8.40063e-11	3.63266e-10	94	P08603	CFH	Complement factor H	CFAH_HUMAN	1	153.52	2.5352	Dengue	QC	NaN	NaN	NaN	81.999	0.136937
Dengue / QC	_TPFVTHPGYDTGNGIQLPGTSGQQPSVGQQMIFEEHGFR_	P02751;P02751-15;P02751-3;P02751-7	0.660534	0.660534	8.46829e-11	3.65893e-10	90	P02751;P02751-15;P02751-3;P02751-7	FN1	Fibronectin;Isoform 15 of Fibronectin;Isoform 3 of Fibronectin;Isoform 7 of Fibronectin	FINC_HUMAN	1	58.0668	1.58067	Dengue	QC	NaN	NaN	NaN	73.4523	0.0990654
Dengue / QC	_GGSTSYGTGSETESPRNPSSAGSWNSGSSGPGSTGNR_	P02671	2.29198	2.29198	8.4873e-11	3.66431e-10	68	P02671	FGA	Fibrinogen alpha chain	FIBA_HUMAN	1	389.729	4.89729	Dengue	QC	NaN	NaN	NaN	55.2809	0.259439
Dengue / QC	_TTMKIIPFNRLTIGEGQQHHLGGAK_	P02679;P02679-2	2.63102	2.63102	8.77359e-11	3.77918e-10	32	P02679;P02679-2	FGG	Fibrinogen gamma chain;Isoform Gamma-A of Fibrinogen gamma chain	FIBG_HUMAN	1	519.462	6.19462	Dengue	QC	NaN	NaN	NaN	22.3412	0.195102
Dengue / QC	_RMPC[Carbamidomethyl (C)]AEDYLSVVLNQLC[Carbamidomethyl (C)]VLHEK[Dimethyl (KR)]_	P02768	0.972478	0.972478	8.92149e-11	3.83994e-10	94	P02768	ALB	Serum albumin	ALBU_HUMAN	1	96.2208	1.96221	Dengue	QC	NaN	NaN	NaN	28.8465	0.142368
Dengue / QC	_ESDWLGQSM[Oxidation (M)]FTC[Carbamidomethyl (C)]R_	P01871	1.21608	1.21608	9.11973e-11	3.91624e-10	44	P01871	IGHM	Immunoglobulin heavy constant mu	IGHM_HUMAN	1	132.315	2.32315	Dengue	QC	NaN	NaN	NaN	31.7861	0.15082
Dengue / QC	_YLFPGEC[Carbamidomethyl (C)]QYVLVQDYC[Carbamidomethyl (C)]GSNPGTFR_	P04275	1.43184	1.43184	9.3304e-11	3.99752e-10	64	P04275	VWF	von Willebrand factor	VWF_HUMAN	1	169.791	2.69791	Dengue	QC	NaN	NaN	NaN	54.4767	0.204121
Dengue / QC	_DGEDQTQDTELVETRPAGDGTFQK_	P05534;P30447	1.22226	1.22226	9.44657e-11	4.03495e-10	44	P05534;P30447	HLA-A	HLA class I histocompatibility antigen, A-24 alpha chain;HLA class I histocompatibility antigen, A-23 alpha chain	1A24_HUMAN;1A23_HUMAN	1	133.312	2.33312	Dengue	QC	NaN	NaN	NaN	35.7486	0.136049
Dengue / QC	_VSNGAGTM[Oxidation (M)]SVSLVADENPFAQGALK_	P06396	0.938342	0.938342	9.56924e-11	4.08113e-10	16	P06396	GSN	Gelsolin	GELS_HUMAN	1	91.6325	1.91632	Dengue	QC	NaN	NaN	NaN	10.1909	0.19328
Dengue / QC	_TFSEWLESVKENPAVIDFELAPIVDLVR_	P13671	1.02301	1.02301	9.65082e-11	4.10967e-10	68	P13671	C6	Complement component C6	CO6_HUMAN	1	103.216	2.03216	Dengue	QC	NaN	NaN	NaN	44.8266	0.137867
Dengue / QC	_A[Acetyl (Protein N-term)]GLNSLEAVKR_	P67936	0.866453	0.866453	9.70673e-11	4.13034e-10	52	P67936	TPM4	Tropomyosin alpha-4 chain	TPM4_HUMAN	1	82.3175	1.82318	Dengue	QC	NaN	NaN	NaN	44.9627	0.11791
Dengue / QC	_SLALGTFAHTPALASLGLSNNR_	P35858;P35858-2	0.729986	0.729986	9.90994e-11	4.20722e-10	136	P35858;P35858-2	IGFALS	Insulin-like growth factor-binding protein complex acid labile subunit;Isoform 2 of Insulin-like growth factor-binding protein complex acid labile subunit	ALS_HUMAN	1	65.8622	1.65862	Dengue	QC	NaN	NaN	NaN	97.2854	0.102994
Dengue / QC	_RMPC[Carbamidomethyl (C)]AEDYLSVVLNQLC[Carbamidomethyl (C)]VLHEK[Methyl (KR)]TPVSDR_	P02768	1.42494	1.42494	1.02948e-10	4.36068e-10	114	P02768	ALB	Serum albumin	ALBU_HUMAN	1	168.502	2.68502	Dengue	QC	NaN	NaN	NaN	97.5632	0.162173
Dengue / QC	_YILQGVTSWGLGC[Carbamidomethyl (C)]ARPNKPGVYVR_	P00747	0.899407	0.899407	1.05762e-10	4.46639e-10	46	P00747	PLG	Plasminogen	PLMN_HUMAN	1	86.53	1.8653	Dengue	QC	NaN	NaN	NaN	24.8603	0.0891223
Dengue / QC	_NHRSPVTLLAAVMSLPEEHNK_	P18428	1.32131	1.32131	1.0741e-10	4.53257e-10	50	P18428	LBP	Lipopolysaccharide-binding protein	LBP_HUMAN	1	149.893	2.49893	Dengue	QC	NaN	NaN	NaN	41.0222	0.147555
Dengue / QC	_ILEGFQPSGR_	P80108	0.481075	0.481075	1.0895e-10	4.58374e-10	118	P80108	GPLD1	Phosphatidylinositol-glycan-specific phospholipase D	PHLD_HUMAN	1	39.5783	1.39578	Dengue	QC	NaN	NaN	NaN	98.5075	0.057401
Dengue / QC	_GSFAC[Carbamidomethyl (C)]QC[Carbamidomethyl (C)]PPGYQK_	Q12805;Q12805-2;Q12805-4	1.22913	1.22913	1.08886e-10	4.58374e-10	48	Q12805;Q12805-2;Q12805-4	EFEMP1	EGF-containing fibulin-like extracellular matrix protein 1;Isoform 2 of EGF-containing fibulin-like extracellular matrix protein 1;Isoform 4 of EGF-containing fibulin-like extracellular matrix protein 1	FBLN3_HUMAN	1	134.426	2.34426	Dengue	QC	NaN	NaN	NaN	42.0072	0.158573
Dengue / QC	_AINEKLGQYASPTAK_	P0C0L5	4.25039	4.25039	1.14851e-10	4.81033e-10	44	P0C0L5	C4B	Complement C4-B	CO4B_HUMAN	1	1803.24	19.0324	Dengue	QC	NaN	NaN	NaN	24.9891	0.308911
Dengue / QC	_TFVLNFIK_	E7END6;P04070;P04070-2	0.9138	0.9138	1.16164e-10	4.85809e-10	26	E7END6;P04070;P04070-2	PROC	Vitamin K-dependent protein C;Vitamin K-dependent protein C;Isoform 2 of Vitamin K-dependent protein C	E7END6_HUMAN;PROC_HUMAN;PROC_HUMAN	1	88.4001	1.884	Dengue	QC	NaN	NaN	NaN	14.3489	0.10826
Dengue / QC	_SSVAAMHWMDGSVVTR_	P22891;P22891-2	0.920341	0.920341	1.18062e-10	4.92756e-10	66	P22891;P22891-2	PROZ	Vitamin K-dependent protein Z;Isoform 2 of Vitamin K-dependent protein Z	PROZ_HUMAN	1	89.2563	1.89256	Dengue	QC	NaN	NaN	NaN	34.3052	0.113701
Dengue / QC	_VAC[Carbamidomethyl (C)]EEPPFIENGAANLHSK_	P05160	0.571105	0.571105	1.21161e-10	5.04075e-10	78	P05160	F13B	Coagulation factor XIII B chain	F13B_HUMAN	1	48.5661	1.48566	Dengue	QC	NaN	NaN	NaN	48.0939	0.0656399
Dengue / QC	_TTSAKETQSIEK_	A0A0U1RR20;Q92954;Q92954-3;Q92954-6	2.57464	2.57464	1.32354e-10	5.482e-10	30	A0A0U1RR20;Q92954;Q92954-3;Q92954-6	PRG4	Proteoglycan 4;Proteoglycan 4;Isoform C of Proteoglycan 4;Isoform F of Proteoglycan 4	A0A0U1RR20_HUMAN;PRG4_HUMAN;PRG4_HUMAN;PRG4_HUMAN	1	495.723	5.95723	Dengue	QC	NaN	NaN	NaN	24.33	0.218466
Dengue / QC	_SETAEELKK_	O14791;O14791-2	0.82472	0.82472	1.34134e-10	5.54748e-10	140	O14791;O14791-2	APOL1	Apolipoprotein L1;Isoform 2 of Apolipoprotein L1	APOL1_HUMAN	1	77.1191	1.77119	Dengue	QC	NaN	NaN	NaN	109.192	0.117173
Dengue / QC	_DLYANTVLSGGTTMYPGIADR_	P60709	0.439275	0.439275	1.38527e-10	5.71652e-10	92	P60709	ACTB	Actin, cytoplasmic 1	ACTB_HUMAN	1	35.5923	1.35592	Dengue	QC	NaN	NaN	NaN	82.1447	0.0878841
Dengue / QC	_EFNPLVIVGLSK_	A0A0A0MRJ7;P12259	0.776502	0.776502	1.40646e-10	5.79544e-10	90	A0A0A0MRJ7;P12259	F5	Coagulation factor V	A0A0A0MRJ7_HUMAN;FA5_HUMAN	1	71.2972	1.71297	Dengue	QC	NaN	NaN	NaN	48.9462	0.167778
Dengue / QC	_GISTSAASPAVGTVGMDMDEDDDFSKWNFYYSPQSSPDKK_	P04114	1.0119	1.0119	1.42175e-10	5.84984e-10	88	P04114	APOB	Apolipoprotein B-100	APOB_HUMAN	1	101.657	2.01657	Dengue	QC	NaN	NaN	NaN	33.9772	0.137056
Dengue / QC	_YGIDWASGR_	O75636	-0.619283	0.619283	1.42307e-10	5.85099e-10	166	O75636	FCN3	Ficolin-3	FCN3_HUMAN	1	-34.9006	0.650994	Dengue	QC	NaN	NaN	NaN	62.3889	0.08293
Dengue / QC	_THTC[Carbamidomethyl (C)]PPC[Carbamidomethyl (C)]PAPELLGGPSVFLFPPKPKDTLMISR_	P01857	2.64282	2.64282	1.42606e-10	5.85899e-10	64	P01857	IGHG1	Immunoglobulin heavy constant gamma 1	IGHG1_HUMAN	1	524.55	6.2455	Dengue	QC	NaN	NaN	NaN	50.5875	0.26313
Dengue / QC	_FTDHLKYVMLPVADQDQC[Carbamidomethyl (C)]IR_	P00738	2.68438	2.68438	1.47498e-10	6.03781e-10	58	P00738	HP	Haptoglobin	HPT_HUMAN	1	542.803	6.42803	Dengue	QC	NaN	NaN	NaN	48.5212	0.310685
Dengue / QC	_C[Carbamidomethyl (C)]TSTGWIPAPR_	P08603	0.322803	0.322803	1.53239e-10	6.26368e-10	170	P08603	CFH	Complement factor H	CFAH_HUMAN	1	25.0758	1.25076	Dengue	QC	NaN	NaN	NaN	90.5975	0.100416
Dengue / QC	_LC[Carbamidomethyl (C)]FFPFVENGHSESSGQTHLEGDTVQIIC[Carbamidomethyl (C)]NTGYR_	Q03591	0.764965	0.764965	1.55998e-10	6.37181e-10	120	Q03591	CFHR1	Complement factor H-related protein 1	FHR1_HUMAN	1	69.9328	1.69933	Dengue	QC	NaN	NaN	NaN	89.1824	0.094095
Dengue / QC	_GIETGSEDLEILPNGLAFISSGLK_	P27169	0.722487	0.722487	1.6385e-10	6.67307e-10	166	P27169	PON1	Serum paraoxonase/arylesterase 1	PON1_HUMAN	1	65.0024	1.65002	Dengue	QC	NaN	NaN	NaN	91.5106	0.0865096
Dengue / QC	_GIVAAFYSGPSLSDKEK_	P80108	1.39951	1.39951	1.72243e-10	7.00471e-10	44	P80108	GPLD1	Phosphatidylinositol-glycan-specific phospholipase D	PHLD_HUMAN	1	163.812	2.63812	Dengue	QC	NaN	NaN	NaN	19.8516	0.115207
Dengue / QC	_LGPLVEQGRVR_	P02649	1.71585	1.71585	1.73769e-10	7.06166e-10	36	P02649	APOE	Apolipoprotein E	APOE_HUMAN	1	228.491	3.28491	Dengue	QC	NaN	NaN	NaN	30.0378	0.198834
Dengue / QC	_ELSHLPSLYDYSAYR_	P10643	0.893164	0.893164	1.77783e-10	7.2091e-10	28	P10643	C7	Complement component C7	CO7_HUMAN	1	85.7245	1.85725	Dengue	QC	NaN	NaN	NaN	22.3036	0.145514
Dengue / QC	_HQSAC[Carbamidomethyl (C)]KDSDWPFC[Carbamidomethyl (C)]SDEDWNYKC[Carbamidomethyl (C)]PSGC[Carbamidomethyl (C)]R_	P02671	2.28325	2.28325	1.79416e-10	7.26478e-10	38	P02671	FGA	Fibrinogen alpha chain	FIBA_HUMAN	1	386.774	4.86774	Dengue	QC	NaN	NaN	NaN	30.1374	0.237812
Dengue / QC	_EATEAAKC[Carbamidomethyl (C)]NLLAEK_	P02765	1.24966	1.24966	1.84403e-10	7.44519e-10	140	P02765	AHSG	Alpha-2-HS-glycoprotein	FETUA_HUMAN	1	137.786	2.37786	Dengue	QC	NaN	NaN	NaN	116.096	0.174824
Dengue / QC	_ALEWLAR_	A0A0C4DH43	-0.677105	0.677105	1.84746e-10	7.45368e-10	174	A0A0C4DH43	IGHV2-70D	Immunoglobulin heavy variable 2-70D	HV70D_HUMAN	1	-37.4581	0.625419	Dengue	QC	NaN	NaN	NaN	81.9112	0.0951185
Dengue / QC	_EHAVEGDC[Carbamidomethyl (C)]DFQLLKLDGK_	P02765	0.874675	0.874675	1.85992e-10	7.49854e-10	170	P02765	AHSG	Alpha-2-HS-glycoprotein	FETUA_HUMAN	1	83.3595	1.8336	Dengue	QC	NaN	NaN	NaN	157.368	0.12226
Dengue / QC	_TPAYYPNAGLIK_	P08519	1.36519	1.36519	1.874e-10	7.54447e-10	134	P08519	LPA	Apolipoprotein(a)	APOA_HUMAN	1	157.61	2.5761	Dengue	QC	NaN	NaN	NaN	105.07	0.202809
Dengue / QC	_FSGTWYAMAKK_	P02753;Q5VY30	2.7845	2.7845	1.90869e-10	7.67862e-10	40	P02753;Q5VY30	RBP4	Retinol-binding protein 4;Retinol binding protein 4, plasma, isoform CRA_b	RET4_HUMAN;Q5VY30_HUMAN	1	588.999	6.88999	Dengue	QC	NaN	NaN	NaN	32.2869	0.253454
Dengue / QC	_VLNYVDWIKKEMEEED_	B4DPQ0	1.04936	1.04936	1.92902e-10	7.75484e-10	66	B4DPQ0	C1R	Complement C1r subcomponent	B4DPQ0_HUMAN	1	106.962	2.06962	Dengue	QC	NaN	NaN	NaN	40.8487	0.106452
Dengue / QC	_DSYYM[Oxidation (M)]TSSQLSTPLQQWR_	A0A0A0MS09;P01880;P01880-2	1.37667	1.37667	1.94546e-10	7.8153e-10	20	A0A0A0MS09;P01880;P01880-2	IGHD	Immunoglobulin heavy constant delta (Fragment);Immunoglobulin heavy constant delta;Isoform 2 of Immunoglobulin heavy constant delta	A0A0A0MS09_HUMAN;IGHD_HUMAN;IGHD_HUMAN	1	159.668	2.59668	Dengue	QC	NaN	NaN	NaN	11.869	0.334666
Dengue / QC	_YVMLPVADQDQC[Carbamidomethyl (C)]IRHYEGSTVPEKK_	P00738	3.87486	3.87486	1.94993e-10	7.82207e-10	68	P00738	HP	Haptoglobin	HPT_HUMAN	1	1367.06	14.6706	Dengue	QC	NaN	NaN	NaN	31.9819	0.399929
Dengue / QC	_WEDPGKQLYNVEATSYALLALLQLK_	P01024	0.566548	0.566548	1.98611e-10	7.96148e-10	40	P01024	C3	Complement C3	CO3_HUMAN	1	48.0976	1.48098	Dengue	QC	NaN	NaN	NaN	31.4007	0.124184
Dengue / QC	_EDLIWELLNQAQEHFGK_	P02787	0.979528	0.979528	2.0501e-10	8.19453e-10	146	P02787	TF	Serotransferrin	TRFE_HUMAN	1	97.1821	1.97182	Dengue	QC	NaN	NaN	NaN	125.999	0.12216
Dengue / QC	_LLIYSNNQR_	P01699	1.39221	1.39221	2.06967e-10	8.25512e-10	64	P01699	IGLV1-44	Immunoglobulin lambda variable 1-44	LV144_HUMAN	1	162.481	2.62481	Dengue	QC	NaN	NaN	NaN	52.2875	0.180225
Dengue / QC	_PLLEKSHC[Carbamidomethyl (C)]IAEVENDEMPADLPSLAADFVESK_	P02768	0.355255	0.355255	2.12936e-10	8.47511e-10	100	P02768	ALB	Serum albumin	ALBU_HUMAN	1	27.9212	1.27921	Dengue	QC	NaN	NaN	NaN	52.4851	0.250779
Dengue / QC	_ASGGTFSSYAISWVR[Methyl (KR)]_	A0A0B4J2H0	1.63096	1.63096	2.15936e-10	8.57214e-10	56	A0A0B4J2H0	IGHV1-69D	Immunoglobulin heavy variable 1-69D	HV69D_HUMAN	1	209.719	3.09719	Dengue	QC	NaN	NaN	NaN	39.003	0.191317
Dengue / QC	_SFYFPMSIDK_	P05160	0.904745	0.904745	2.19445e-10	8.69093e-10	40	P05160	F13B	Coagulation factor XIII B chain	F13B_HUMAN	1	87.2214	1.87221	Dengue	QC	NaN	NaN	NaN	21.3335	0.0940951
Dengue / QC	_WSHPPSC[Carbamidomethyl (C)]IKTDC[Carbamidomethyl (C)]LSLPSFENAIPMGEK_	P08603	1.54231	1.54231	2.23197e-10	8.82037e-10	100	P08603	CFH	Complement factor H	CFAH_HUMAN	1	191.261	2.91261	Dengue	QC	NaN	NaN	NaN	77.6019	0.199697
Dengue / QC	_RITEVWGIPSPIDTVFTR_	A0A0U1RR20;Q92954;Q92954-3;Q92954-6	0.93247	0.93247	2.33648e-10	9.19495e-10	128	A0A0U1RR20;Q92954;Q92954-3;Q92954-6	PRG4	Proteoglycan 4;Proteoglycan 4;Isoform C of Proteoglycan 4;Isoform F of Proteoglycan 4	A0A0U1RR20_HUMAN;PRG4_HUMAN;PRG4_HUMAN;PRG4_HUMAN	1	90.8541	1.90854	Dengue	QC	NaN	NaN	NaN	61.0027	0.116009
Dengue / QC	_PGSAPTTVIYEDNQRPSGVPDR_	P01721	1.10509	1.10509	2.35248e-10	9.24496e-10	42	P01721	IGLV6-57	Immunoglobulin lambda variable 6-57	LV657_HUMAN	1	115.112	2.15112	Dengue	QC	NaN	NaN	NaN	32.5247	0.133742
Dengue / QC	_ALRDFALQNPSAVPR_	P35858;P35858-2	0.571196	0.571196	2.59058e-10	1.0138e-09	104	P35858;P35858-2	IGFALS	Insulin-like growth factor-binding protein complex acid labile subunit;Isoform 2 of Insulin-like growth factor-binding protein complex acid labile subunit	ALS_HUMAN	1	48.5755	1.48575	Dengue	QC	NaN	NaN	NaN	92.341	0.0699991
Dengue / QC	_TLADLTLLDSPIKVPLLLSEPINIIDALEM[Oxidation (M)]R_	P04114	1.05201	1.05201	2.75691e-10	1.07663e-09	102	P04114	APOB	Apolipoprotein B-100	APOB_HUMAN	1	107.342	2.07342	Dengue	QC	NaN	NaN	NaN	26.7696	0.117267
Dengue / QC	_QTVNLQLQPYSLVTTLNSDLK_	P04114	1.09602	1.09602	2.80848e-10	1.09525e-09	118	P04114	APOB	Apolipoprotein B-100	APOB_HUMAN	1	113.765	2.13765	Dengue	QC	NaN	NaN	NaN	48.2907	0.103173
Dengue / QC	_SQETGDLDVGGLQETDKIIEVEEEQEDPYLNDR_	P23142	1.31695	1.31695	2.94912e-10	1.14611e-09	74	P23142	FBLN1	Fibulin-1	FBLN1_HUMAN	1	149.138	2.49138	Dengue	QC	NaN	NaN	NaN	54.4507	0.145716
Dengue / QC	_FC[Carbamidomethyl (C)]EAEFSVK_	Q16610	1.36169	1.36169	2.95419e-10	1.14728e-09	54	Q16610	ECM1	Extracellular matrix protein 1	ECM1_HUMAN	1	156.986	2.56986	Dengue	QC	NaN	NaN	NaN	46.826	0.181624
Dengue / QC	_VAAEDWKKGDTFSC[Carbamidomethyl (C)]M[Oxidation (M)]VGHEALPLAFTQK_	A0A0G2JMB2	0.468038	0.468038	3.07193e-10	1.19053e-09	142	A0A0G2JMB2	IGHA2	Immunoglobulin heavy constant alpha 2 (Fragment)	A0A0G2JMB2_HUMAN	1	38.3227	1.38323	Dengue	QC	NaN	NaN	NaN	100.75	0.282687
Dengue / QC	_C[Carbamidomethyl (C)]HAGHLNGVYYQGGTYSK_	P02679;P02679-2	2.40954	2.40954	3.10021e-10	1.20066e-09	36	P02679;P02679-2	FGG	Fibrinogen gamma chain;Isoform Gamma-A of Fibrinogen gamma chain	FIBG_HUMAN	1	431.305	5.31305	Dengue	QC	NaN	NaN	NaN	30.9797	0.219514
Dengue / QC	_HYYESEVLAMNFQDWATASR_	P08185	1.44239	1.44239	3.169e-10	1.22476e-09	44	P08185	SERPINA6	Corticosteroid-binding globulin	CBG_HUMAN	1	171.772	2.71772	Dengue	QC	NaN	NaN	NaN	22.482	0.137337
Dengue / QC	_GGGAGFISGLSYLELDNPAGNK_	P10643	0.992651	0.992651	3.17661e-10	1.22686e-09	94	P10643	C7	Complement component C7	CO7_HUMAN	1	98.9838	1.98984	Dengue	QC	NaN	NaN	NaN	82.6371	0.155879
Dengue / QC	_PSETTLC[Carbamidomethyl (C)]QVAGWGHQFEGAEEYASFLQEAQVPFLSLER_	P00748	1.62368	1.62368	3.19658e-10	1.23287e-09	62	P00748	F12	Coagulation factor XII	FA12_HUMAN	1	208.16	3.0816	Dengue	QC	NaN	NaN	NaN	37.6685	0.128837
Dengue / QC	_DLATVYVDVLKDSGRDYVSQFEGSALGK_	P02647	0.576804	0.576804	3.20904e-10	1.23683e-09	112	P02647	APOA1	Apolipoprotein A-I	APOA1_HUMAN	1	49.1542	1.49154	Dengue	QC	NaN	NaN	NaN	57.5995	0.0982797
Dengue / QC	_VTITADESTSTAYMELSSLR_	A0A0B4J2H0	0.876632	0.876632	3.30019e-10	1.26934e-09	96	A0A0B4J2H0	IGHV1-69D	Immunoglobulin heavy variable 1-69D	HV69D_HUMAN	1	83.6084	1.83608	Dengue	QC	NaN	NaN	NaN	81.0468	0.121047
Dengue / QC	_GRFPLYNLGFGHNVDFNFLEVMSMENNGR_	P19827	1.62033	1.62033	3.49775e-10	1.33981e-09	34	P19827	ITIH1	Inter-alpha-trypsin inhibitor heavy chain H1	ITIH1_HUMAN	1	207.445	3.07445	Dengue	QC	NaN	NaN	NaN	21.1467	0.204227
Dengue / QC	_C[Carbamidomethyl (C)]VYLQTSMK_	P20742	3.63455	3.63455	3.56107e-10	1.3622e-09	42	P20742	PZP	Pregnancy zone protein	PZP_HUMAN	1	1141.96	12.4196	Dengue	QC	NaN	NaN	NaN	35.9887	0.455944
Dengue / QC	_ALVQQMEQLR_	P06727	0.769859	0.769859	3.88547e-10	1.47822e-09	112	P06727	APOA4	Apolipoprotein A-IV	APOA4_HUMAN	1	70.5103	1.7051	Dengue	QC	NaN	NaN	NaN	95.7688	0.120785
Dengue / QC	_ITYYHLSFPTNIQAPAVVFR_	P23142-4	0.529825	0.529825	3.95068e-10	1.49997e-09	148	P23142-4	FBLN1	Isoform C of Fibulin-1	FBLN1_HUMAN	1	44.3754	1.44375	Dengue	QC	NaN	NaN	NaN	124.337	0.0788272
Dengue / QC	_WEDPGKQLYNVEATSYALLALLQLKDFDFVPPVVR_	P01024	1.03834	1.03834	4.00022e-10	1.51776e-09	58	P01024	C3	Complement C3	CO3_HUMAN	1	105.387	2.05387	Dengue	QC	NaN	NaN	NaN	25.0152	0.160467
Dengue / QC	_VGYVSGWGQSDNFKLTDHLK_	P00739	1.148	1.148	4.11589e-10	1.56058e-09	134	P00739	HPR	Haptoglobin-related protein	HPTR_HUMAN	1	121.607	2.21607	Dengue	QC	NaN	NaN	NaN	97.8868	0.142947
Dengue / QC	_ESSSHHPGIAEFPSRGK_	P02671	1.95474	1.95474	4.18614e-10	1.58615e-09	34	P02671	FGA	Fibrinogen alpha chain	FIBA_HUMAN	1	287.646	3.87646	Dengue	QC	NaN	NaN	NaN	27.3418	0.200071
Dengue / QC	_SVPPSASHVAPTETFTYEWTVPKEVGPTNADPVC[Carbamidomethyl (C)]LAK_	P00450	2.6156	2.6156	4.28058e-10	1.61865e-09	50	P00450	CP	Ceruloplasmin	CERU_HUMAN	1	512.878	6.12878	Dengue	QC	NaN	NaN	NaN	39.6902	0.295695
Dengue / QC	_M[Oxidation (M)]KYWGVASFLQK_	P02753;Q5VY30	1.12909	1.12909	4.32173e-10	1.63311e-09	106	P02753;Q5VY30	RBP4	Retinol-binding protein 4;Retinol binding protein 4, plasma, isoform CRA_b	RET4_HUMAN;Q5VY30_HUMAN	1	118.721	2.18721	Dengue	QC	NaN	NaN	NaN	97.1684	0.124503
Dengue / QC	_ETTFNSLLC[Carbamidomethyl (C)]PSGGEVSEELSLK_	P01023	0.654545	0.654545	4.50684e-10	1.70076e-09	148	P01023	A2M	Alpha-2-macroglobulin	A2MG_HUMAN	1	57.412	1.57412	Dengue	QC	NaN	NaN	NaN	135.356	0.106334
Dengue / QC	_LKC[Carbamidomethyl (C)]QPVDC[Carbamidomethyl (C)]GIPESIENGKVEDPESTLFGSVIR_	P09871	1.85395	1.85395	4.52355e-10	1.70363e-09	36	P09871	C1S	Complement C1s subcomponent	C1S_HUMAN	1	261.49	3.6149	Dengue	QC	NaN	NaN	NaN	24.3444	0.214434
Dengue / QC	_SHC[Carbamidomethyl (C)]IAEVENDEM[Oxidation (M)]PADLPSLAADFVESK[Methyl (KR)]DVC[Carbamidomethyl (C)]KNYAEAK_	P02768	2.71025	2.71025	4.62271e-10	1.73863e-09	144	P02768	ALB	Serum albumin	ALBU_HUMAN	1	554.434	6.54434	Dengue	QC	NaN	NaN	NaN	97.2343	0.508087
Dengue / QC	_VVFLNTQLC[Carbamidomethyl (C)]QFRPDAFGGLPR_	P22792	0.356429	0.356429	4.63428e-10	1.74182e-09	140	P22792	CPN2	Carboxypeptidase N subunit 2	CPN2_HUMAN	1	28.0253	1.28025	Dengue	QC	NaN	NaN	NaN	101.981	0.0649536
Dengue / QC	_GTFSTTVTGR_	P08519	1.87833	1.87833	4.68117e-10	1.75708e-09	132	P08519	LPA	Apolipoprotein(a)	APOA_HUMAN	1	267.65	3.6765	Dengue	QC	NaN	NaN	NaN	98.5911	0.21182
Dengue / QC	_DFGTHYITEAVLGGIYEYTLVMNK_	P07358	1.04304	1.04304	4.7013e-10	1.7611e-09	50	P07358	C8B	Complement component C8 beta chain	CO8B_HUMAN	1	106.056	2.06056	Dengue	QC	NaN	NaN	NaN	45.5195	0.131901
Dengue / QC	_VQLSNDFDEYIM[Oxidation (M)]AIEQTIKSGSDEVQVGQQR_	P01024	3.36502	3.36502	4.79083e-10	1.79105e-09	42	P01024	C3	Complement C3	CO3_HUMAN	1	930.317	10.3032	Dengue	QC	NaN	NaN	NaN	21.514	0.441728
Dengue / QC	_AGTELVNFLSYFVELGTQPATQ_	P02652;V9GYM3	0.635931	0.635931	4.80229e-10	1.79294e-09	56	P02652;V9GYM3	APOA2	Apolipoprotein A-II	APOA2_HUMAN;V9GYM3_HUMAN	1	55.394	1.55394	Dengue	QC	NaN	NaN	NaN	15.2374	0.114772
Dengue / QC	_EVKIDGQFR_	P04114	1.25409	1.25409	4.96014e-10	1.84572e-09	30	P04114	APOB	Apolipoprotein B-100	APOB_HUMAN	1	138.516	2.38516	Dengue	QC	NaN	NaN	NaN	18.517	0.2086
Dengue / QC	_TSESGELHGLTTEEEFVEGIYKVEIDTK_	P02766	1.10541	1.10541	4.975e-10	1.85003e-09	176	P02766	TTR	Transthyretin	TTHY_HUMAN	1	115.159	2.15159	Dengue	QC	NaN	NaN	NaN	124.879	0.121427
Dengue / QC	_VSNKALPAPIEK_	P01857	2.78626	2.78626	5.09619e-10	1.89258e-09	162	P01857	IGHG1	Immunoglobulin heavy constant gamma 1	IGHG1_HUMAN	1	589.841	6.89841	Dengue	QC	NaN	NaN	NaN	134.17	0.373855
Dengue / QC	_RIPLYYPNAGLTR_	P08519	1.91598	1.91598	5.24439e-10	1.94376e-09	110	P08519	LPA	Apolipoprotein(a)	APOA_HUMAN	1	277.37	3.7737	Dengue	QC	NaN	NaN	NaN	72.4187	0.254544
Dengue / QC	_C[Carbamidomethyl (C)]VDVDEC[Carbamidomethyl (C)]APPAEPC[Carbamidomethyl (C)]GK_	P23142	0.608954	0.608954	5.36512e-10	1.97803e-09	136	P23142	FBLN1	Fibulin-1	FBLN1_HUMAN	1	52.5153	1.52515	Dengue	QC	NaN	NaN	NaN	124.169	0.0890698
Dengue / QC	_PIC[Carbamidomethyl (C)]LPC[Carbamidomethyl (C)]TMEANLALR_	B4E1Z4	0.889931	0.889931	5.54186e-10	2.03516e-09	90	B4E1Z4	NaN	cDNA FLJ55673, highly similar to Complement factor B (EC 3.4.21.47)	B4E1Z4_HUMAN	1	85.3088	1.85309	Dengue	QC	NaN	NaN	NaN	63.9238	0.146266
Dengue / QC	_SK[Methyl (KR)]TDGGTTDYAAPVK_	A0A0B4J1V0	-0.109632	0.109632	5.55693e-10	2.03936e-09	28	A0A0B4J1V0	IGHV3-15	Immunoglobulin heavy variable 3-15	HV315_HUMAN	1	-7.31756	0.926824	Dengue	QC	NaN	NaN	NaN	16.8279	0.421845
Dengue / QC	_M[Oxidation (M)]KPVPDLVPGNFK_	P02671	3.60548	3.60548	5.58187e-10	2.04717e-09	32	P02671	FGA	Fibrinogen alpha chain	FIBA_HUMAN	1	1117.19	12.1719	Dengue	QC	NaN	NaN	NaN	15.5929	0.206403
Dengue / QC	_VGYVSGWGRNANFK_	P00738	1.2464	1.2464	5.66608e-10	2.07534e-09	48	P00738	HP	Haptoglobin	HPT_HUMAN	1	137.249	2.37249	Dengue	QC	NaN	NaN	NaN	39.5675	0.14619
Dengue / QC	_VLAPATFYAIC[Carbamidomethyl (C)]QQDSC[Carbamidomethyl (C)]HQEQVC[Carbamidomethyl (C)]EVIASYAHLC[Carbamidomethyl (C)]R_	P04275	1.53387	1.53387	5.83591e-10	2.13336e-09	56	P04275	VWF	von Willebrand factor	VWF_HUMAN	1	189.561	2.89561	Dengue	QC	NaN	NaN	NaN	47.0879	0.171852
Dengue / QC	_SQPM[Oxidation (M)]GLWR_	P25311	1.63852	1.63852	6.36812e-10	2.32035e-09	40	P25311	AZGP1	Zinc-alpha-2-glycoprotein	ZA2G_HUMAN	1	211.345	3.11345	Dengue	QC	NaN	NaN	NaN	34.654	0.205954
Dengue / QC	_GSFQC[Carbamidomethyl (C)]GPC[Carbamidomethyl (C)]QPGFVGDQASGC[Carbamidomethyl (C)]QR_	G3XAP6;P49747	1.63972	1.63972	6.40268e-10	2.32991e-09	38	G3XAP6;P49747	COMP	Cartilage oligomeric matrix protein	G3XAP6_HUMAN;COMP_HUMAN	1	211.605	3.11605	Dengue	QC	NaN	NaN	NaN	28.9872	0.226579
Dengue / QC	_AVSM[Oxidation (M)]PSFSILGSDVRVPSYTLILPSLELPVLHVPR_	P04114	0.996996	0.996996	6.49885e-10	2.36337e-09	112	P04114	APOB	Apolipoprotein B-100	APOB_HUMAN	1	99.584	1.99584	Dengue	QC	NaN	NaN	NaN	67.5378	0.184861
Dengue / QC	_EYC[Carbamidomethyl (C)]GVPGDGDEELLRFSN_	P02760	2.23164	2.23164	6.75761e-10	2.44952e-09	40	P02760	AMBP	Protein AMBP	AMBP_HUMAN	1	369.669	4.69669	Dengue	QC	NaN	NaN	NaN	33.4027	0.237765
Dengue / QC	_NTVLVLNTQSLVFVQTDKPMYKPGQTVR_	P20742	2.75496	2.75496	6.89929e-10	2.49926e-09	38	P20742	PZP	Pregnancy zone protein	PZP_HUMAN	1	575.034	6.75034	Dengue	QC	NaN	NaN	NaN	30.8037	0.304664
Dengue / QC	_TDELPQLVTLPHPNLHGPEILDVPSTVQK_	P02751;P02751-15;P02751-3;P02751-7	1.07834	1.07834	7.00098e-10	2.53283e-09	36	P02751;P02751-15;P02751-3;P02751-7	FN1	Fibronectin;Isoform 15 of Fibronectin;Isoform 3 of Fibronectin;Isoform 7 of Fibronectin	FINC_HUMAN	1	111.161	2.11161	Dengue	QC	NaN	NaN	NaN	28.4859	0.119424
Dengue / QC	_YRC[Carbamidomethyl (C)]HPGYKPTTDEPTTVIC[Carbamidomethyl (C)]QK_	P04003	2.49413	2.49413	7.07242e-10	2.55702e-09	78	P04003	C4BPA	C4b-binding protein alpha chain	C4BPA_HUMAN	1	463.387	5.63387	Dengue	QC	NaN	NaN	NaN	54.7365	0.32703
Dengue / QC	_WLGRYYC[Carbamidomethyl (C)]FQGNQFLR_	P02790	0.381217	0.381217	7.4992e-10	2.70087e-09	152	P02790	HPX	Hemopexin	HEMO_HUMAN	1	30.244	1.30244	Dengue	QC	NaN	NaN	NaN	109.791	0.0608171
Dengue / QC	_IYGNQDTSSQLKKFYNQVSTPLLR_	P19823	0.958984	0.958984	8.09589e-10	2.90085e-09	100	P19823	ITIH2	Inter-alpha-trypsin inhibitor heavy chain H2	ITIH2_HUMAN	1	94.394	1.94394	Dengue	QC	NaN	NaN	NaN	87.2721	0.116362
Dengue / QC	_WNPSPPAC[Carbamidomethyl (C)]EPNSC[Carbamidomethyl (C)]INLPDIPHASWETYPRPTK_	P04003	1.17286	1.17286	8.31502e-10	2.96988e-09	50	P04003	C4BPA	C4b-binding protein alpha chain	C4BPA_HUMAN	1	125.458	2.25458	Dengue	QC	NaN	NaN	NaN	14.8351	0.147324
Dengue / QC	_KGGVASGFK_	P06396	1.09209	1.09209	8.34503e-10	2.9787e-09	78	P06396	GSN	Gelsolin	GELS_HUMAN	1	113.182	2.13182	Dengue	QC	NaN	NaN	NaN	67.6694	0.15896
Dengue / QC	_QLVEIEKVVLHPNYHQVDIGLIK_	P00739	0.947863	0.947863	8.35336e-10	2.97977e-09	104	P00739	HPR	Haptoglobin-related protein	HPTR_HUMAN	1	92.9014	1.92901	Dengue	QC	NaN	NaN	NaN	94.7645	0.130738
Dengue / QC	_NKYGM[Oxidation (M)]VAQVTQTLK_	P04114	-0.828424	0.828424	8.52802e-10	3.03821e-09	24	P04114	APOB	Apolipoprotein B-100	APOB_HUMAN	1	-43.6856	0.563144	Dengue	QC	NaN	NaN	NaN	11.2892	0.33405
Dengue / QC	_GFNC[Carbamidomethyl (C)]ESKPEAEETC[Carbamidomethyl (C)]FDK_	P02751;P02751-15;P02751-3;P02751-7	1.22199	1.22199	8.5524e-10	3.04496e-09	64	P02751;P02751-15;P02751-3;P02751-7	FN1	Fibronectin;Isoform 15 of Fibronectin;Isoform 3 of Fibronectin;Isoform 7 of Fibronectin	FINC_HUMAN	1	133.268	2.33268	Dengue	QC	NaN	NaN	NaN	51.9042	0.177694
Dengue / QC	_VHVSEEGTEPEAMLQVLGPKPALPAGTEDTAK_	P06396	1.58249	1.58249	8.74006e-10	3.09604e-09	24	P06396	GSN	Gelsolin	GELS_HUMAN	1	199.487	2.99487	Dengue	QC	NaN	NaN	NaN	18.5665	0.138431
Dengue / QC	_LVNGQSHISLSKAEFQDALEKLNMGITDLQGLR_	P0C0L5	0.617607	0.617607	9.12021e-10	3.22662e-09	152	P0C0L5	C4B	Complement C4-B	CO4B_HUMAN	1	53.4328	1.53433	Dengue	QC	NaN	NaN	NaN	90.0519	0.0982978
Dengue / QC	_TLAFPLTIR_	A0A0U1RQQ4;Q9UNN8	0.986556	0.986556	9.34547e-10	3.30214e-09	54	A0A0U1RQQ4;Q9UNN8	PROCR	Endothelial protein C receptor (Fragment);Endothelial protein C receptor	A0A0U1RQQ4_HUMAN;EPCR_HUMAN	1	98.1449	1.98145	Dengue	QC	NaN	NaN	NaN	38.0439	0.120467
Dengue / QC	_WVMVPMMSLHHLTIPYFRDEELSC[Carbamidomethyl (C)]TVVELK_	P01011	1.61995	1.61995	9.42656e-10	3.3287e-09	72	P01011	SERPINA3	Alpha-1-antichymotrypsin	AACT_HUMAN	1	207.364	3.07364	Dengue	QC	NaN	NaN	NaN	62.3063	0.21904
Dengue / QC	_RPHETGGYMLEC[Carbamidomethyl (C)]VC[Carbamidomethyl (C)]LGNGK_	P02751;P02751-15;P02751-3;P02751-7	1.04247	1.04247	9.81876e-10	3.45847e-09	46	P02751;P02751-15;P02751-3;P02751-7	FN1	Fibronectin;Isoform 15 of Fibronectin;Isoform 3 of Fibronectin;Isoform 7 of Fibronectin	FINC_HUMAN	1	105.975	2.05975	Dengue	QC	NaN	NaN	NaN	34.405	0.135021
Dengue / QC	_YTLNKNSLKIEIPLPFGGK_	P04114	0.551634	0.551634	1.01907e-09	3.58499e-09	114	P04114	APOB	Apolipoprotein B-100	APOB_HUMAN	1	46.5745	1.46575	Dengue	QC	NaN	NaN	NaN	99.037	0.0923199
Dengue / QC	_SSSYSKQFTSSTSYNRGDSTFESK_	P02671	1.28286	1.28286	1.02612e-09	3.60524e-09	120	P02671	FGA	Fibrinogen alpha chain	FIBA_HUMAN	1	143.32	2.4332	Dengue	QC	NaN	NaN	NaN	68.7837	0.267099
Dengue / QC	_ANLSSQALQMSLDYGFVTPLTSMSIR_	P19827	1.35304	1.35304	1.06563e-09	3.73005e-09	36	P19827	ITIH1	Inter-alpha-trypsin inhibitor heavy chain H1	ITIH1_HUMAN	1	155.449	2.55449	Dengue	QC	NaN	NaN	NaN	24.5646	0.151372
Dengue / QC	_MELERPGGNEITR_	P02671	3.13859	3.13859	1.06845e-09	3.73758e-09	132	P02671	FGA	Fibrinogen alpha chain	FIBA_HUMAN	1	780.665	8.80665	Dengue	QC	NaN	NaN	NaN	105.519	0.391072
Dengue / QC	_NSLFEYQK_	P02671	1.67345	1.67345	1.07216e-09	3.74822e-09	110	P02671	FGA	Fibrinogen alpha chain	FIBA_HUMAN	1	218.977	3.18977	Dengue	QC	NaN	NaN	NaN	87.8321	0.206022
Dengue / QC	_TFYEPGEEITYSC[Carbamidomethyl (C)]K_	P02749	0.616929	0.616929	1.12422e-09	3.92045e-09	70	P02749	APOH	Beta-2-glycoprotein 1	APOH_HUMAN	1	53.3607	1.53361	Dengue	QC	NaN	NaN	NaN	45.1613	0.109195
Dengue / QC	_LNM[Oxidation (M)]GITDLQGLR_	P0C0L5	0.655512	0.655512	1.16942e-09	4.07186e-09	52	P0C0L5	C4B	Complement C4-B	CO4B_HUMAN	1	57.5174	1.57517	Dengue	QC	NaN	NaN	NaN	46.6274	0.0927201
Dengue / QC	_GM[Oxidation (M)]TRPLSTLISSSQSC[Carbamidomethyl (C)]QYTLDAK_	P04114	1.21237	1.21237	1.17436e-09	4.0851e-09	36	P04114	APOB	Apolipoprotein B-100	APOB_HUMAN	1	131.717	2.31717	Dengue	QC	NaN	NaN	NaN	12.8972	0.0762671
Dengue / QC	_C[Carbamidomethyl (C)]QFFTYSLLPEDC[Carbamidomethyl (C)]KEEK_	H0YAC1;P03952	0.651103	0.651103	1.20385e-09	4.167e-09	148	H0YAC1;P03952	KLKB1	Plasma kallikrein (Fragment);Plasma kallikrein	H0YAC1_HUMAN;KLKB1_HUMAN	1	57.0368	1.57037	Dengue	QC	NaN	NaN	NaN	93.803	0.0822485
Dengue / QC	_VSNK[Methyl (KR)]GLPAPIEK_	P01859	2.95265	2.95265	1.2051e-09	4.16875e-09	148	P01859	IGHG2	Immunoglobulin heavy constant gamma 2	IGHG2_HUMAN	1	674.171	7.74171	Dengue	QC	NaN	NaN	NaN	126.66	0.383914
Dengue / QC	_GEYEEHLGILGPIIR_	A0A0A0MRJ7;P12259	0.42479	0.42479	1.26811e-09	4.37323e-09	128	A0A0A0MRJ7;P12259	F5	Coagulation factor V	A0A0A0MRJ7_HUMAN;FA5_HUMAN	1	34.2377	1.34238	Dengue	QC	NaN	NaN	NaN	101.659	0.080865
Dengue / QC	_GVTFLLR_	P04217	-0.463585	0.463585	1.32146e-09	4.54602e-09	172	P04217	A1BG	Alpha-1B-glycoprotein	A1BG_HUMAN	1	-27.4818	0.725182	Dengue	QC	NaN	NaN	NaN	86.6036	0.0673896
Dengue / QC	_GISSTTVTGR_	P08519	1.87694	1.87694	1.38079e-09	4.74138e-09	80	P08519	LPA	Apolipoprotein(a)	APOA_HUMAN	1	267.294	3.67294	Dengue	QC	NaN	NaN	NaN	66.2512	0.256749
Dengue / QC	_KWQEEM[Oxidation (M)]ELYR_	P02647	0.603043	0.603043	1.39026e-09	4.77097e-09	94	P02647	APOA1	Apolipoprotein A-I	APOA1_HUMAN	1	51.8917	1.51892	Dengue	QC	NaN	NaN	NaN	76.4789	0.0792827
Dengue / QC	_LAKTYETTLEKC[Carbamidomethyl (C)]C[Carbamidomethyl (C)]AAADPHEC[Carbamidomethyl (C)]YAK_	P02768	2.15372	2.15372	1.39954e-09	4.79695e-09	146	P02768	ALB	Serum albumin	ALBU_HUMAN	1	344.973	4.44973	Dengue	QC	NaN	NaN	NaN	105.476	0.327807
Dengue / QC	_LFDSDPITVTVPVEVSRK_	P10909;P10909-2;P10909-4;P10909-5	0.349418	0.349418	1.44491e-09	4.93737e-09	114	P10909;P10909-2;P10909-4;P10909-5	CLU	Clusterin;Isoform 2 of Clusterin;Isoform 4 of Clusterin;Isoform 5 of Clusterin	CLUS_HUMAN	1	27.4046	1.27405	Dengue	QC	NaN	NaN	NaN	86.3767	0.0713197
Dengue / QC	_C[Carbamidomethyl (C)]LAYDFYPGKIDVHWTR_	P25311	1.82818	1.82818	1.44954e-09	4.94817e-09	118	P25311	AZGP1	Zinc-alpha-2-glycoprotein	ZA2G_HUMAN	1	255.088	3.55088	Dengue	QC	NaN	NaN	NaN	74.7491	0.18921
Dengue / QC	_LDVDQALNR_	I3L145;P04278	1.52586	1.52586	1.45272e-09	4.95497e-09	32	I3L145;P04278	SHBG	Sex hormone-binding globulin	I3L145_HUMAN;SHBG_HUMAN	1	187.958	2.87958	Dengue	QC	NaN	NaN	NaN	21.6556	0.305995
Dengue / QC	_WADLSGITK_	P29622	1.31104	1.31104	1.46284e-09	4.98647e-09	26	P29622	SERPINA4	Kallistatin	KAIN_HUMAN	1	148.12	2.4812	Dengue	QC	NaN	NaN	NaN	13.5145	0.096959
Dengue / QC	_LVPFATELHER_	P06727	0.659041	0.659041	1.48394e-09	5.04613e-09	92	P06727	APOA4	Apolipoprotein A-IV	APOA4_HUMAN	1	57.9032	1.57903	Dengue	QC	NaN	NaN	NaN	80.0317	0.0921021
Dengue / QC	_RLWWLDLKSGAQATWTELPWPHEK_	P02790	0.902073	0.902073	1.5162e-09	5.15269e-09	144	P02790	HPX	Hemopexin	HEMO_HUMAN	1	86.875	1.86875	Dengue	QC	NaN	NaN	NaN	137.349	0.116088
Dengue / QC	_NQVVIAAGR_	P80108	0.621842	0.621842	1.52051e-09	5.16421e-09	140	P80108	GPLD1	Phosphatidylinositol-glycan-specific phospholipase D	PHLD_HUMAN	1	53.8838	1.53884	Dengue	QC	NaN	NaN	NaN	74.1028	0.0733109
Dengue / QC	_EC[Carbamidomethyl (C)]VGFEAVQEVPVGLVQPASATLYDYYNPER_	P0C0L5	0.584475	0.584475	1.53168e-09	5.199e-09	164	P0C0L5	C4B	Complement C4-B	CO4B_HUMAN	1	49.9493	1.49949	Dengue	QC	NaN	NaN	NaN	132.392	0.098281
Dengue / QC	_ETAVDGELVVLYDVKREEK_	P19823	0.809063	0.809063	1.54568e-09	5.24334e-09	124	P19823	ITIH2	Inter-alpha-trypsin inhibitor heavy chain H2	ITIH2_HUMAN	1	75.2073	1.75207	Dengue	QC	NaN	NaN	NaN	83.0205	0.106219
Dengue / QC	_VGDRNTEQEEGGEAVHEVEVVIK_	P00742	0.703447	0.703447	1.56879e-09	5.31209e-09	48	P00742	F10	Coagulation factor X	FA10_HUMAN	1	62.839	1.62839	Dengue	QC	NaN	NaN	NaN	38.2375	0.0954286
Dengue / QC	_QKTGLDSPTGIDFSDITANSFTVHWIAPR_	P02751;P02751-15;P02751-3;P02751-7	0.808789	0.808789	1.5786e-09	5.33885e-09	82	P02751;P02751-15;P02751-3;P02751-7	FN1	Fibronectin;Isoform 15 of Fibronectin;Isoform 3 of Fibronectin;Isoform 7 of Fibronectin	FINC_HUMAN	1	75.174	1.75174	Dengue	QC	NaN	NaN	NaN	48.4874	0.133559
Dengue / QC	_AAFGQGSGPIM[Oxidation (M)]LDEVQC[Carbamidomethyl (C)]TGTEASLADC[Carbamidomethyl (C)]K_	Q08380	0.466203	0.466203	1.58412e-09	5.35106e-09	38	Q08380	LGALS3BP	Galectin-3-binding protein	LG3BP_HUMAN	1	38.1469	1.38147	Dengue	QC	NaN	NaN	NaN	17.6422	0.341937
Dengue / QC	_FKDLGEENFKALVLIAFAQYLQQC[Carbamidomethyl (C)]PFEDHVK_	P02768	0.793959	0.793959	1.59097e-09	5.36774e-09	176	P02768	ALB	Serum albumin	ALBU_HUMAN	1	73.3826	1.73383	Dengue	QC	NaN	NaN	NaN	122.014	0.0973061
Dengue / QC	_MLADAPPQDPSC[Carbamidomethyl (C)]C[Carbamidomethyl (C)]SGALYYGSK_	P19823	0.395473	0.395473	1.59904e-09	5.38523e-09	176	P19823	ITIH2	Inter-alpha-trypsin inhibitor heavy chain H2	ITIH2_HUMAN	1	31.5374	1.31537	Dengue	QC	NaN	NaN	NaN	146.136	0.0638481
Dengue / QC	_NLNEKDYELLC[Carbamidomethyl (C)]LDGTRK_	P02787	1.76495	1.76495	1.63024e-09	5.48372e-09	88	P02787	TF	Serotransferrin	TRFE_HUMAN	1	239.862	3.39862	Dengue	QC	NaN	NaN	NaN	46.6106	0.222235
Dengue / QC	_KC[Carbamidomethyl (C)]YFPYLENGYNQNHGR_	Q5TFM2	1.10246	1.10246	1.64775e-09	5.53597e-09	56	Q5TFM2	CFH	Complement factor H	Q5TFM2_HUMAN	1	114.72	2.1472	Dengue	QC	NaN	NaN	NaN	49.3214	0.137679
Dengue / QC	_NTFAEVTGLSPGVTYYFKVFAVSHGR_	P02751;P02751-15;P02751-3;P02751-7	0.901351	0.901351	1.70839e-09	5.72254e-09	62	P02751;P02751-15;P02751-3;P02751-7	FN1	Fibronectin;Isoform 15 of Fibronectin;Isoform 3 of Fibronectin;Isoform 7 of Fibronectin	FINC_HUMAN	1	86.7814	1.86781	Dengue	QC	NaN	NaN	NaN	45.3124	0.111493
Dengue / QC	_GLEWVANIK_	P01780	-0.785469	0.785469	1.7219e-09	5.76434e-09	164	P01780	IGHV3-7	Immunoglobulin heavy variable 3-7	HV307_HUMAN	1	-41.9837	0.580163	Dengue	QC	NaN	NaN	NaN	66.976	0.109529
Dengue / QC	_VNRNNLELSTPLKIETISHEDLQR_	P07225	0.861181	0.861181	1.7591e-09	5.87836e-09	94	P07225	PROS1	Vitamin K-dependent protein S	PROS_HUMAN	1	81.6525	1.81652	Dengue	QC	NaN	NaN	NaN	62.9263	0.116069
Dengue / QC	_AFQPFFVELTMPYSVIRGEAFTLK_	P01023	0.854472	0.854472	1.77245e-09	5.91943e-09	124	P01023	A2M	Alpha-2-macroglobulin	A2MG_HUMAN	1	80.8097	1.8081	Dengue	QC	NaN	NaN	NaN	95.086	0.13062
Dengue / QC	_GLVWVSR_	A0A075B7E8	-0.5486	0.5486	1.82793e-09	6.09745e-09	176	A0A075B7E8	IGHV3OR16-13	Immunoglobulin heavy variable 3/OR16-13 (non-functional) (Fragment)	A0A075B7E8_HUMAN	1	-31.6317	0.683683	Dengue	QC	NaN	NaN	NaN	70.8201	0.0784862
Dengue / QC	_VLDAVRGSPAINVAVHVFRK_	P02766	1.26054	1.26054	1.85359e-09	6.17571e-09	60	P02766	TTR	Transthyretin	TTHY_HUMAN	1	139.586	2.39586	Dengue	QC	NaN	NaN	NaN	49.062	0.169341
Dengue / QC	_TYLFKGSQYWR_	P04004	2.19358	2.19358	1.88289e-09	6.26585e-09	64	P04004	VTN	Vitronectin	VTNC_HUMAN	1	357.44	4.5744	Dengue	QC	NaN	NaN	NaN	54.1515	0.230225
Dengue / QC	_LLDSLPSDTRLVLLNAIYLSAK_	P05155;P05155-3	0.696013	0.696013	1.90291e-09	6.32498e-09	50	P05155;P05155-3	SERPING1	Plasma protease C1 inhibitor;Isoform 3 of Plasma protease C1 inhibitor	IC1_HUMAN	1	62.0022	1.62002	Dengue	QC	NaN	NaN	NaN	30.1398	0.192738
Dengue / QC	_KKPGIYTR_	K7ERG9;P00746	1.52222	1.52222	1.95658e-09	6.48796e-09	12	K7ERG9;P00746	CFD	Complement factor D	K7ERG9_HUMAN;CFAD_HUMAN	1	187.232	2.87232	Dengue	QC	NaN	NaN	NaN	6.57009	0.16372
Dengue / QC	_VKEGMNIVEAMER_	P62937	0.627621	0.627621	1.98561e-09	6.58033e-09	68	P62937	PPIA	Peptidyl-prolyl cis-trans isomerase A	PPIA_HUMAN	1	54.5015	1.54501	Dengue	QC	NaN	NaN	NaN	60.3187	0.0739154
Dengue / QC	_EPC[Carbamidomethyl (C)]VESLVSQYFQTVTDYGK_	P02652;V9GYM3	0.660126	0.660126	1.99299e-09	6.597e-09	158	P02652;V9GYM3	APOA2	Apolipoprotein A-II	APOA2_HUMAN;V9GYM3_HUMAN	1	58.022	1.58022	Dengue	QC	NaN	NaN	NaN	117.914	0.0828286
Dengue / QC	_VLIQSVSC[Carbamidomethyl (C)]TGTEDTLAQC[Carbamidomethyl (C)]EQEEVYDC[Carbamidomethyl (C)]SHDEDAGASC[Carbamidomethyl (C)]ENPESSFSPVPEGVR[Methyl (KR)]_	O43866	0.508407	0.508407	2.01683e-09	6.66803e-09	132	O43866	CD5L	CD5 antigen-like	CD5L_HUMAN	1	42.2479	1.42248	Dengue	QC	NaN	NaN	NaN	87.9063	0.170966
Dengue / QC	_DLATVYVDVLKDSGR_	P02647	0.289815	0.289815	2.06421e-09	6.80062e-09	166	P02647	APOA1	Apolipoprotein A-I	APOA1_HUMAN	1	22.2483	1.22248	Dengue	QC	NaN	NaN	NaN	94.7044	0.0857704
Dengue / QC	_ENFVLTTAK_	P22891;P22891-2	0.525222	0.525222	2.11126e-09	6.94338e-09	56	P22891;P22891-2	PROZ	Vitamin K-dependent protein Z;Isoform 2 of Vitamin K-dependent protein Z	PROZ_HUMAN	1	43.9155	1.43916	Dengue	QC	NaN	NaN	NaN	44.8632	0.0932167
Dengue / QC	_C[Carbamidomethyl (C)]VGWNGQC[Carbamidomethyl (C)]SGK_	P27918	0.802735	0.802735	2.13358e-09	7.01267e-09	100	P27918	CFP	Properdin	PROP_HUMAN	1	74.4405	1.7444	Dengue	QC	NaN	NaN	NaN	80.3294	0.178205
Dengue / QC	_TLRVQGNDHSATR_	Q14624	2.43027	2.43027	2.13872e-09	7.02422e-09	82	Q14624	ITIH4	Inter-alpha-trypsin inhibitor heavy chain H4	ITIH4_HUMAN	1	438.994	5.38994	Dengue	QC	NaN	NaN	NaN	56.689	0.33773
Dengue / QC	_DSMIWDC[Carbamidomethyl (C)]TC[Carbamidomethyl (C)]IGAGR_	P02751;P02751-15;P02751-3;P02751-7	0.779517	0.779517	2.21738e-09	7.27529e-09	154	P02751;P02751-15;P02751-3;P02751-7	FN1	Fibronectin;Isoform 15 of Fibronectin;Isoform 3 of Fibronectin;Isoform 7 of Fibronectin	FINC_HUMAN	1	71.6556	1.71656	Dengue	QC	NaN	NaN	NaN	138.913	0.115046
Dengue / QC	_LTSLSDRYVSHFETEGPHVLLYFDSVPTSR_	P0C0L5	0.539942	0.539942	2.24894e-09	7.37452e-09	158	P0C0L5	C4B	Complement C4-B	CO4B_HUMAN	1	45.3914	1.45391	Dengue	QC	NaN	NaN	NaN	118.371	0.10121
Dengue / QC	_FSAEFDFR_	P07225	0.527651	0.527651	2.36933e-09	7.75114e-09	134	P07225	PROS1	Vitamin K-dependent protein S	PROS_HUMAN	1	44.158	1.44158	Dengue	QC	NaN	NaN	NaN	84.0597	0.0742545
Dengue / QC	_AHVDALR_	P02647	0.616938	0.616938	2.39911e-09	7.84401e-09	146	P02647	APOA1	Apolipoprotein A-I	APOA1_HUMAN	1	53.3617	1.53362	Dengue	QC	NaN	NaN	NaN	118.58	0.0997866
Dengue / QC	_LLIYDASSLESGVPSR_	A0A0B4J2D9;P0DP09	-0.845825	0.845825	2.41173e-09	7.88066e-09	154	A0A0B4J2D9;P0DP09	IGKV1D-13;IGKV1-13	Immunoglobulin kappa variable 1D-13;Immunoglobulin kappa variable 1-13	KVD13_HUMAN;KV113_HUMAN	1	-44.3607	0.556393	Dengue	QC	NaN	NaN	NaN	133.416	0.136179
Dengue / QC	_MEPFHFKNSVIKVPMMNSK_	P05155;P05155-3	0.664577	0.664577	2.50464e-09	8.1652e-09	124	P05155;P05155-3	SERPING1	Plasma protease C1 inhibitor;Isoform 3 of Plasma protease C1 inhibitor	IC1_HUMAN	1	58.5103	1.5851	Dengue	QC	NaN	NaN	NaN	71.7473	0.223411
Dengue / QC	_TYTC[Carbamidomethyl (C)]NVDHKPSNTKVDK_	P01861	1.45175	1.45175	2.57034e-09	8.36965e-09	136	P01861	IGHG4	Immunoglobulin heavy constant gamma 4	IGHG4_HUMAN	1	173.54	2.7354	Dengue	QC	NaN	NaN	NaN	119.158	0.187699
Dengue / QC	_LLIYDASSR_	A0A0C4DH25	-1.18699	1.18699	2.59483e-09	8.44451e-09	176	A0A0C4DH25	IGKV3D-20	Immunoglobulin kappa variable 3D-20	KVD20_HUMAN	1	-56.0782	0.439218	Dengue	QC	NaN	NaN	NaN	60.0505	0.171263
Dengue / QC	_GSFSTTVTGR_	P08519	1.31428	1.31428	2.65525e-09	8.62109e-09	138	P08519	LPA	Apolipoprotein(a)	APOA_HUMAN	1	148.677	2.48677	Dengue	QC	NaN	NaN	NaN	129.689	0.197862
Dengue / QC	_LHELQEKLSPLGEEMRDR_	P02647	1.3692	1.3692	2.67056e-09	8.65575e-09	110	P02647	APOA1	Apolipoprotein A-I	APOA1_HUMAN	1	158.328	2.58328	Dengue	QC	NaN	NaN	NaN	96.9222	0.175059
Dengue / QC	_ASDTAM[Oxidation (M)]YYC[Carbamidomethyl (C)]AR[Methyl (KR)]_	A0A0C4DH38	1.02866	1.02866	2.70458e-09	8.75589e-09	44	A0A0C4DH38	IGHV5-51	Immunoglobulin heavy variable 5-51	HV551_HUMAN	1	104.013	2.04013	Dengue	QC	NaN	NaN	NaN	36.2337	0.174261
Dengue / QC	_ASQGISNSLAWYQQKPGK_	A0A0G2JRQ6	2.11242	2.11242	2.83814e-09	9.16415e-09	26	A0A0G2JRQ6	NaN	Uncharacterized protein (Fragment)	A0A0G2JRQ6_HUMAN	1	332.416	4.32416	Dengue	QC	NaN	NaN	NaN	20.5716	0.273944
Dengue / QC	_ETEGLRQEMSKDLEEVK_	P02647	1.02939	1.02939	2.84125e-09	9.16657e-09	68	P02647	APOA1	Apolipoprotein A-I	APOA1_HUMAN	1	104.116	2.04116	Dengue	QC	NaN	NaN	NaN	59.8164	0.115602
Dengue / QC	_DNAKNSLYLQM[Oxidation (M)]NSLRAEDTAVYYC[Carbamidomethyl (C)]AR_	A0A0B4J1V1	1.54277	1.54277	2.91896e-09	9.40107e-09	112	A0A0B4J1V1	IGHV3-21	Immunoglobulin heavy variable 3-21	HV321_HUMAN	1	191.353	2.91353	Dengue	QC	NaN	NaN	NaN	51.8209	0.737003
Dengue / QC	_HYEGSTVPEKK_	P00738	0.99365	0.99365	2.97607e-09	9.57279e-09	172	P00738	HP	Haptoglobin	HPT_HUMAN	1	99.1216	1.99122	Dengue	QC	NaN	NaN	NaN	107.236	0.157085
Dengue / QC	_EEAPSLRPAPPPISGGGYR_	P02675	2.77914	2.77914	2.9774e-09	9.57279e-09	112	P02675	FGB	Fibrinogen beta chain	FIBB_HUMAN	1	586.441	6.86441	Dengue	QC	NaN	NaN	NaN	89.1233	0.375453
Dengue / QC	_MKFAC[Carbamidomethyl (C)]YYPR_	P0C0L5	1.9184	1.9184	3.00358e-09	9.64165e-09	48	P0C0L5	C4B	Complement C4-B	CO4B_HUMAN	1	278.003	3.78003	Dengue	QC	NaN	NaN	NaN	36.3024	0.261978
Dengue / QC	_TTPPVLDSDGSFFLYSKLTVDK_	P01857	0.555537	0.555537	3.00085e-09	9.64165e-09	126	P01857	IGHG1	Immunoglobulin heavy constant gamma 1	IGHG1_HUMAN	1	46.9716	1.46972	Dengue	QC	NaN	NaN	NaN	120.662	0.0863125
Dengue / QC	_KLTIFKTELR_	P04114	1.37883	1.37883	3.01202e-09	9.65815e-09	64	P04114	APOB	Apolipoprotein B-100	APOB_HUMAN	1	160.057	2.60057	Dengue	QC	NaN	NaN	NaN	59.143	0.16667
Dengue / QC	_KGGETSEMYLIQPDSSVKPYR_	P02675	2.5332	2.5332	3.0214e-09	9.67594e-09	134	P02675	FGB	Fibrinogen beta chain	FIBB_HUMAN	1	478.854	5.78854	Dengue	QC	NaN	NaN	NaN	110.571	0.356561
Dengue / QC	_TVLSPVEPSC[Carbamidomethyl (C)]EGMQC[Carbamidomethyl (C)]AAGQR_	Q9Y6R7	1.59801	1.59801	3.10348e-09	9.92688e-09	34	Q9Y6R7	FCGBP	IgGFc-binding protein	FCGBP_HUMAN	1	202.724	3.02724	Dengue	QC	NaN	NaN	NaN	28.2721	0.228486
Dengue / QC	_LWAYLTIQELLAK_	P19827	1.02194	1.02194	3.22562e-09	1.02735e-08	104	P19827	ITIH1	Inter-alpha-trypsin inhibitor heavy chain H1	ITIH1_HUMAN	1	103.064	2.03064	Dengue	QC	NaN	NaN	NaN	75.093	0.157839
Dengue / QC	_C[Carbamidomethyl (C)]C[Carbamidomethyl (C)]VEC[Carbamidomethyl (C)]PPC[Carbamidomethyl (C)]PAPPVAGPSVFLFPPKPKDTLMISR_	P01859	2.11515	2.11515	3.22835e-09	1.02735e-08	44	P01859	IGHG2	Immunoglobulin heavy constant gamma 2	IGHG2_HUMAN	1	333.235	4.33235	Dengue	QC	NaN	NaN	NaN	36.7227	0.251328
Dengue / QC	_GHMLENHVERLWAYLTIQELLAKR_	P19827	0.748461	0.748461	3.38254e-09	1.07276e-08	156	P19827	ITIH1	Inter-alpha-trypsin inhibitor heavy chain H1	ITIH1_HUMAN	1	67.9999	1.68	Dengue	QC	NaN	NaN	NaN	121.288	0.114113
Dengue / QC	_ILSVKGLLVGEILSAVLSQEGINILTHLPK_	P01031	1.62521	1.62521	3.48237e-09	1.10193e-08	48	P01031	C5	Complement C5	CO5_HUMAN	1	208.488	3.08488	Dengue	QC	NaN	NaN	NaN	37.0366	0.18796
Dengue / QC	_AHVDALRTHLAPYSDELRQR_	P02647	1.30424	1.30424	3.48681e-09	1.10271e-08	42	P02647	APOA1	Apolipoprotein A-I	APOA1_HUMAN	1	146.954	2.46954	Dengue	QC	NaN	NaN	NaN	36.2585	0.132374
Dengue / QC	_HATKTAKDALSSVQESQVAQQAR_	B0YIW2;P02656	1.6779	1.6779	3.50932e-09	1.10858e-08	52	B0YIW2;P02656	APOC3	Apolipoprotein C-III	B0YIW2_HUMAN;APOC3_HUMAN	1	219.961	3.19961	Dengue	QC	NaN	NaN	NaN	42.0073	0.202746
Dengue / QC	_VGDTYERPKDSMIWDC[Carbamidomethyl (C)]TC[Carbamidomethyl (C)]IGAGR_	P02751;P02751-15;P02751-3;P02751-7	2.51195	2.51195	3.54762e-09	1.11816e-08	36	P02751;P02751-15;P02751-3;P02751-7	FN1	Fibronectin;Isoform 15 of Fibronectin;Isoform 3 of Fibronectin;Isoform 7 of Fibronectin	FINC_HUMAN	1	470.391	5.70391	Dengue	QC	NaN	NaN	NaN	28.8288	0.380003
Dengue / QC	_ALGISPFHEHAEVVFTANDSGPR_	P02766	0.373682	0.373682	3.62632e-09	1.14168e-08	176	P02766	TTR	Transthyretin	TTHY_HUMAN	1	29.5655	1.29566	Dengue	QC	NaN	NaN	NaN	131.006	0.0605935
Dengue / QC	_IQLVEEELDRAQER_	P67936	1.1246	1.1246	3.6619e-09	1.15159e-08	84	P67936	TPM4	Tropomyosin alpha-4 chain	TPM4_HUMAN	1	118.041	2.18041	Dengue	QC	NaN	NaN	NaN	56.1961	0.172575
Dengue / QC	_RNLQNNAEWVYQGAIR_	P04114	0.470345	0.470345	3.76682e-09	1.18193e-08	92	P04114	APOB	Apolipoprotein B-100	APOB_HUMAN	1	38.5441	1.38544	Dengue	QC	NaN	NaN	NaN	51.5985	0.0809093
Dengue / QC	_LKHELTDEELQSLFTNFANVVDK_	P43652	0.753874	0.753874	3.77067e-09	1.18248e-08	102	P43652	AFM	Afamin	AFAM_HUMAN	1	68.6315	1.68631	Dengue	QC	NaN	NaN	NaN	83.7262	0.12986
Dengue / QC	_VSFLSALEEYTK_	P02647	1.2931	1.2931	3.80115e-09	1.1907e-08	40	P02647	APOA1	Apolipoprotein A-I	APOA1_HUMAN	1	145.054	2.45054	Dengue	QC	NaN	NaN	NaN	7.30348	0.0458453
Dengue / QC	_DKDQEVLLQTFLDDASPGDK_	P04114	0.860267	0.860267	3.82029e-09	1.19603e-08	76	P04114	APOB	Apolipoprotein B-100	APOB_HUMAN	1	81.5374	1.81537	Dengue	QC	NaN	NaN	NaN	41.5348	0.0955423
Dengue / QC	_LPSNVVK_	P20742	1.53849	1.53849	3.8646e-09	1.20855e-08	28	P20742	PZP	Pregnancy zone protein	PZP_HUMAN	1	190.49	2.9049	Dengue	QC	NaN	NaN	NaN	14.0609	0.115404
Dengue / QC	_VLSIAQAHSPAFSC[Carbamidomethyl (C)]EQVR_	P08571	0.790937	0.790937	3.8754e-09	1.21125e-08	42	P08571	CD14	Monocyte differentiation antigen CD14	CD14_HUMAN	1	73.0198	1.7302	Dengue	QC	NaN	NaN	NaN	27.614	0.0959521
Dengue / QC	_VTISVDTSK[Dimethyl (KR)]NQFSLK_	P06331	0.260977	0.260977	3.90494e-09	1.2198e-08	50	P06331	IGHV4-34	Immunoglobulin heavy variable 4-34	HV434_HUMAN	1	19.829	1.19829	Dengue	QC	NaN	NaN	NaN	22.4255	0.726544
Dengue / QC	_IPLYYPNAGLTR_	P08519	1.34576	1.34576	3.9484e-09	1.23201e-08	80	P08519	LPA	Apolipoprotein(a)	APOA_HUMAN	1	154.163	2.54163	Dengue	QC	NaN	NaN	NaN	55.6049	0.203827
Dengue / QC	_TQVNTQAEQLR_	P06727	1.13125	1.13125	3.98765e-09	1.24287e-08	70	P06727	APOA4	Apolipoprotein A-IV	APOA4_HUMAN	1	119.049	2.19049	Dengue	QC	NaN	NaN	NaN	44.7961	0.196868
Dengue / QC	_RLTLQGIISWGSGC[Carbamidomethyl (C)]GDR_	P00748	1.22024	1.22024	4.08231e-09	1.27025e-08	114	P00748	F12	Coagulation factor XII	FA12_HUMAN	1	132.985	2.32985	Dengue	QC	NaN	NaN	NaN	86.4574	0.171259
Dengue / QC	_WDFDNRPHILHGEYIEFIC[Carbamidomethyl (C)]R_	P05160	1.49678	1.49678	4.11807e-09	1.27996e-08	32	P05160	F13B	Coagulation factor XIII B chain	F13B_HUMAN	1	182.213	2.82213	Dengue	QC	NaN	NaN	NaN	23.2806	0.179439
Dengue / QC	_YEDGTLSLTSTSDLQSGIIK_	P04114	0.476089	0.476089	4.25063e-09	1.3197e-08	140	P04114	APOB	Apolipoprotein B-100	APOB_HUMAN	1	39.0968	1.39097	Dengue	QC	NaN	NaN	NaN	120.564	0.0829625
Dengue / QC	_DSITTWEILAVSM[Oxidation (M)]SDKK_	P01024	0.983914	0.983914	4.27181e-09	1.32554e-08	44	P01024	C3	Complement C3	CO3_HUMAN	1	97.7823	1.97782	Dengue	QC	NaN	NaN	NaN	36.7186	0.116322
Dengue / QC	_NAIGGKFPLYNLGFGNNLNYNFLENMALENHGFARR_	Q06033;Q06033-2	2.2709	2.2709	4.33624e-09	1.34404e-08	40	Q06033;Q06033-2	ITIH3	Inter-alpha-trypsin inhibitor heavy chain H3;Isoform 2 of Inter-alpha-trypsin inhibitor heavy chain H3	ITIH3_HUMAN	1	382.623	4.82623	Dengue	QC	NaN	NaN	NaN	28.8509	0.248494
Dengue / QC	_EQQALQTVC[Carbamidomethyl (C)]LK_	E9PHK0;P05452	0.46084	0.46084	4.43872e-09	1.37505e-08	52	E9PHK0;P05452	CLEC3B	Tetranectin	E9PHK0_HUMAN;TETN_HUMAN	1	37.6343	1.37634	Dengue	QC	NaN	NaN	NaN	25.7482	0.108097
Dengue / QC	_QLNYKHYDGSYSTFGER_	P01023	2.26646	2.26646	4.59475e-09	1.42024e-08	108	P01023	A2M	Alpha-2-macroglobulin	A2MG_HUMAN	1	381.141	4.81141	Dengue	QC	NaN	NaN	NaN	77.2621	0.319788
Dengue / QC	_VPGTSTSATLTGLTR_	P02751;P02751-15;P02751-3;P02751-7	0.500641	0.500641	4.67006e-09	1.44114e-08	104	P02751;P02751-15;P02751-3;P02751-7	FN1	Fibronectin;Isoform 15 of Fibronectin;Isoform 3 of Fibronectin;Isoform 7 of Fibronectin	FINC_HUMAN	1	41.4842	1.41484	Dengue	QC	NaN	NaN	NaN	67.4918	0.1734
Dengue / QC	_LISVDTEHSNIYLQNGPDRIGR_	P00450	0.820499	0.820499	4.75107e-09	1.46452e-08	100	P00450	CP	Ceruloplasmin	CERU_HUMAN	1	76.6017	1.76602	Dengue	QC	NaN	NaN	NaN	66.9351	0.0922981
Dengue / QC	_KVLLDGVQNPRAEDLVGK_	P01024	1.12848	1.12848	4.75875e-09	1.46608e-08	120	P01024	C3	Complement C3	CO3_HUMAN	1	118.628	2.18628	Dengue	QC	NaN	NaN	NaN	101.415	0.157111
Dengue / QC	_GLESQTK_	P0C0L5	0.925937	0.925937	4.88183e-09	1.49988e-08	114	P0C0L5	C4B	Complement C4-B	CO4B_HUMAN	1	89.9918	1.89992	Dengue	QC	NaN	NaN	NaN	84.5612	0.151487
Dengue / QC	_SIAYLQMNSLK_	A0A0A0MS15	-0.650077	0.650077	4.89721e-09	1.50378e-08	164	A0A0A0MS15	IGHV3-49	Immunoglobulin heavy variable 3-49	HV349_HUMAN	1	-36.2754	0.637246	Dengue	QC	NaN	NaN	NaN	74.7293	0.0917016
Dengue / QC	_QKVLVNER_	P00739	1.29151	1.29151	5.14033e-09	1.57412e-08	74	P00739	HPR	Haptoglobin-related protein	HPTR_HUMAN	1	144.784	2.44784	Dengue	QC	NaN	NaN	NaN	63.2528	0.162803
Dengue / QC	_PRPGVTEATITGLEPGTEYTIYVIALK_	P02751;P02751-15;P02751-3;P02751-7	1.89869	1.89869	5.22116e-09	1.598e-08	52	P02751;P02751-15;P02751-3;P02751-7	FN1	Fibronectin;Isoform 15 of Fibronectin;Isoform 3 of Fibronectin;Isoform 7 of Fibronectin	FINC_HUMAN	1	272.875	3.72875	Dengue	QC	NaN	NaN	NaN	31.2292	0.22084
Dengue / QC	_LLIYDASNR_	P04433	-0.677992	0.677992	5.27821e-09	1.61282e-08	176	P04433	IGKV3-11	Immunoglobulin kappa variable 3-11	KV311_HUMAN	1	-37.4965	0.625035	Dengue	QC	NaN	NaN	NaN	49.3629	0.0962017
Dengue / QC	_MGVSWIR_	A0A0B4J1V2	-0.632333	0.632333	5.46934e-09	1.66758e-08	160	A0A0B4J1V2	IGHV2-26	Immunoglobulin heavy variable 2-26	HV226_HUMAN	1	-35.4868	0.645132	Dengue	QC	NaN	NaN	NaN	86.8039	0.0956008
Dengue / QC	_AHYGGFTVQNEANKYQISVNK_	P02675	2.49765	2.49765	5.51022e-09	1.67914e-08	130	P02675	FGB	Fibrinogen beta chain	FIBB_HUMAN	1	464.766	5.64766	Dengue	QC	NaN	NaN	NaN	106.16	0.332951
Dengue / QC	_TEHGSEMLFFGNAIEGK_	P04114	0.679724	0.679724	5.51717e-09	1.68033e-08	128	P04114	APOB	Apolipoprotein B-100	APOB_HUMAN	1	60.1833	1.60183	Dengue	QC	NaN	NaN	NaN	113.598	0.105338
Dengue / QC	_VYFFKGK_	P04004	0.99586	0.99586	5.60995e-09	1.70396e-08	28	P04004	VTN	Vitronectin	VTNC_HUMAN	1	99.4269	1.99427	Dengue	QC	NaN	NaN	NaN	19.4502	0.143994
Dengue / QC	_RLDYQEGPPGVEISC[Carbamidomethyl (C)]WSVEL_	Q14624	0.80741	0.80741	5.7762e-09	1.75161e-08	174	Q14624	ITIH4	Inter-alpha-trypsin inhibitor heavy chain H4	ITIH4_HUMAN	1	75.0066	1.75007	Dengue	QC	NaN	NaN	NaN	76.3675	0.111092
Dengue / QC	_SLEVTFTPVIEDIGK_	P19320	0.933723	0.933723	5.84827e-09	1.77155e-08	42	P19320	VCAM1	Vascular cell adhesion protein 1	VCAM1_HUMAN	1	91.02	1.9102	Dengue	QC	NaN	NaN	NaN	33.4987	0.158601
Dengue / QC	_TAGWNIPMGLLYNKINHC[Carbamidomethyl (C)]RFDEFFSEGC[Carbamidomethyl (C)]APGSK_	P02787	0.713809	0.713809	5.87365e-09	1.77828e-08	176	P02787	TF	Serotransferrin	TRFE_HUMAN	1	64.0128	1.64013	Dengue	QC	NaN	NaN	NaN	134.45	0.0909808
Dengue / QC	_SISTAYLQWSSLK[Methyl (KR)]_	A0A0C4DH38	1.11027	1.11027	5.95867e-09	1.80013e-08	54	A0A0C4DH38	IGHV5-51	Immunoglobulin heavy variable 5-51	HV551_HUMAN	1	115.887	2.15887	Dengue	QC	NaN	NaN	NaN	45.6729	0.153481
Dengue / QC	_NGQWSEPPKC[Carbamidomethyl (C)]LHPC[Carbamidomethyl (C)]VISR_	P08603	0.915932	0.915932	6.11046e-09	1.84102e-08	152	P08603	CFH	Complement factor H	CFAH_HUMAN	1	88.6788	1.88679	Dengue	QC	NaN	NaN	NaN	132.866	0.102196
Dengue / QC	_VGSDSVQC[Carbamidomethyl (C)]YQFGWSPNFPTC[Carbamidomethyl (C)]K_	Q9BXR6	0.999431	0.999431	6.29899e-09	1.89375e-08	40	Q9BXR6	CFHR5	Complement factor H-related protein 5	FHR5_HUMAN	1	99.9211	1.99921	Dengue	QC	NaN	NaN	NaN	30.4796	0.167749
Dengue / QC	_GGVASGFKHVVPNEVVVQR_	P06396	1.27101	1.27101	6.39694e-09	1.91908e-08	62	P06396	GSN	Gelsolin	GELS_HUMAN	1	141.33	2.4133	Dengue	QC	NaN	NaN	NaN	36.0009	0.214335
Dengue / QC	_LPSGLPVSLLTLYLDNNKISNIPDEYFK_	P51884	0.72664	0.72664	6.41551e-09	1.92362e-08	28	P51884	LUM	Lumican	LUM_HUMAN	1	65.478	1.65478	Dengue	QC	NaN	NaN	NaN	22.9859	0.134089
Dengue / QC	_GFPIKEDFLEQSEQLFGAKPVSLTGK_	P08697	0.448288	0.448288	6.59484e-09	1.97422e-08	126	P08697	SERPINF2	Alpha-2-antiplasmin	A2AP_HUMAN	1	36.442	1.36442	Dengue	QC	NaN	NaN	NaN	98.1427	0.0843529
Dengue / QC	_RHLVPGAPFLLQALVREMSGSPASGIPVK_	P0C0L5	0.605369	0.605369	6.73657e-09	2.01558e-08	82	P0C0L5	C4B	Complement C4-B	CO4B_HUMAN	1	52.1367	1.52137	Dengue	QC	NaN	NaN	NaN	46.8582	0.155227
Dengue / QC	_MADEAGSEADHEGTHSTKR_	P02671	1.9836	1.9836	6.83122e-09	2.04148e-08	160	P02671	FGA	Fibrinogen alpha chain	FIBA_HUMAN	1	295.477	3.95477	Dengue	QC	NaN	NaN	NaN	114.498	0.272684
Dengue / QC	_IEGSNKVPVDPATYGQFYGGDSYIILYNYR_	P06396	0.800366	0.800366	6.88969e-09	2.05481e-08	152	P06396	GSN	Gelsolin	GELS_HUMAN	1	74.1543	1.74154	Dengue	QC	NaN	NaN	NaN	76.1065	0.104043
Dengue / QC	_LLIYGNSNR[Methyl (KR)]PSGVPDR_	P01703	-0.677967	0.677967	7.18153e-09	2.1373e-08	164	P01703	IGLV1-40	Immunoglobulin lambda variable 1-40	LV140_HUMAN	1	-37.4955	0.625045	Dengue	QC	NaN	NaN	NaN	48.4329	0.0950325
Dengue / QC	_SHC[Carbamidomethyl (C)]IAEVENDEMPADLPSLAADFVESKDVC[Carbamidomethyl (C)]K_	P02768	0.700503	0.700503	7.26327e-09	2.16047e-08	176	P02768	ALB	Serum albumin	ALBU_HUMAN	1	62.5071	1.62507	Dengue	QC	NaN	NaN	NaN	119.253	0.115386
Dengue / QC	_ILGEELGFASLHDLQLLGK_	P04114	0.619426	0.619426	7.30391e-09	2.16955e-08	72	P04114	APOB	Apolipoprotein B-100	APOB_HUMAN	1	53.6263	1.53626	Dengue	QC	NaN	NaN	NaN	56.2587	0.100745
Dengue / QC	_YQKEEFC[Carbamidomethyl (C)]GLLSSPTGPLSSC[Carbamidomethyl (C)]HK_	Q9Y6R7	2.18866	2.18866	7.29822e-09	2.16955e-08	30	Q9Y6R7	FCGBP	IgGFc-binding protein	FCGBP_HUMAN	1	355.883	4.55883	Dengue	QC	NaN	NaN	NaN	24.1964	0.276433
Dengue / QC	_IDWDDDKFYSTSLK_	A0A0C4DH43	0.95324	0.95324	7.3617e-09	2.18511e-08	56	A0A0C4DH43	IGHV2-70D	Immunoglobulin heavy variable 2-70D	HV70D_HUMAN	1	93.6216	1.93622	Dengue	QC	NaN	NaN	NaN	42.7864	0.112624
Dengue / QC	_DATC[Carbamidomethyl (C)]NC[Carbamidomethyl (C)]DYNC[Carbamidomethyl (C)]QHYMEC[Carbamidomethyl (C)]C[Carbamidomethyl (C)]PDFKR_	A0A0U1RR20;Q92954;Q92954-3;Q92954-6	1.6475	1.6475	7.52845e-09	2.23225e-08	34	A0A0U1RR20;Q92954;Q92954-3;Q92954-6	PRG4	Proteoglycan 4;Proteoglycan 4;Isoform C of Proteoglycan 4;Isoform F of Proteoglycan 4	A0A0U1RR20_HUMAN;PRG4_HUMAN;PRG4_HUMAN;PRG4_HUMAN	1	213.291	3.13291	Dengue	QC	NaN	NaN	NaN	26.0961	0.205135
Dengue / QC	_DLFHC[Carbamidomethyl (C)]VSFTLPR_	P20742	3.24201	3.24201	7.63127e-09	2.25984e-08	34	P20742	PZP	Pregnancy zone protein	PZP_HUMAN	1	846.114	9.46114	Dengue	QC	NaN	NaN	NaN	28.4372	0.427007
Dengue / QC	_FQILTLWLPDSLTTWEIHGLSLSK_	P0C0L5	0.798664	0.798664	7.63363e-09	2.25984e-08	58	P0C0L5	C4B	Complement C4-B	CO4B_HUMAN	1	73.949	1.73949	Dengue	QC	NaN	NaN	NaN	40.0921	0.139047
Dengue / QC	_LNHQLEGLTFQMK_	P06727	0.513598	0.513598	7.7266e-09	2.28375e-08	124	P06727	APOA4	Apolipoprotein A-IV	APOA4_HUMAN	1	42.7606	1.42761	Dengue	QC	NaN	NaN	NaN	119.805	0.0793595
Dengue / QC	_GC[Carbamidomethyl (C)]PAALPLSNLYETLGVVGSTTTQLYTDR_	Q15582	1.16066	1.16066	7.72371e-09	2.28375e-08	44	Q15582	TGFBI	Transforming growth factor-beta-induced protein ig-h3	BGH3_HUMAN	1	123.56	2.2356	Dengue	QC	NaN	NaN	NaN	39.4655	0.166629
Dengue / QC	_VIPAC[Carbamidomethyl (C)]LPSPNYVVADRTEC[Carbamidomethyl (C)]FITGWGETQGTFGAGLLK_	P00747	0.553781	0.553781	7.78756e-09	2.30055e-08	124	P00747	PLG	Plasminogen	PLMN_HUMAN	1	46.7928	1.46793	Dengue	QC	NaN	NaN	NaN	64.9416	0.0856492
Dengue / QC	_GRYEFHSLNIHSC[Carbamidomethyl (C)]ELLHSALRPVPGQGLSLSISDSSIR_	P18428	1.08262	1.08262	7.80989e-09	2.30593e-08	36	P18428	LBP	Lipopolysaccharide-binding protein	LBP_HUMAN	1	111.787	2.11787	Dengue	QC	NaN	NaN	NaN	25.9652	0.168721
Dengue / QC	_GLLSGWAR_	P22891;P22891-2	0.526143	0.526143	7.82821e-09	2.31013e-08	160	P22891;P22891-2	PROZ	Vitamin K-dependent protein Z;Isoform 2 of Vitamin K-dependent protein Z	PROZ_HUMAN	1	44.0074	1.44007	Dengue	QC	NaN	NaN	NaN	71.4524	0.104978
Dengue / QC	_NTLYLQM[Oxidation (M)]NSLR_	A0A0J9YVT0;P0DP02	-0.599154	0.599154	7.90099e-09	2.33038e-08	166	A0A0J9YVT0;P0DP02	IGHV3-33;IGHV3-30-3	Immunoglobulin heavy variable 3-33 (Fragment);Immunoglobulin heavy variable 3-30-3	A0A0J9YVT0_HUMAN;HVC33_HUMAN	1	-33.9859	0.660141	Dengue	QC	NaN	NaN	NaN	63.1024	0.0962868
Dengue / QC	_TLNLAQNLLAQLPEELFHPLTSLQTLK_	P22792	0.629124	0.629124	8.04973e-09	2.36926e-08	62	P22792	CPN2	Carboxypeptidase N subunit 2	CPN2_HUMAN	1	54.6625	1.54663	Dengue	QC	NaN	NaN	NaN	46.779	0.11203
Dengue / QC	_TAGYGINILGM[Oxidation (M)]DPLSTPFDNEFYNGLC[Carbamidomethyl (C)]NR_	P02748	0.5523	0.5523	8.09974e-09	2.38273e-08	44	P02748	C9	Complement component C9	CO9_HUMAN	1	46.6422	1.46642	Dengue	QC	NaN	NaN	NaN	23.4445	0.247505
Dengue / QC	_TLVQEWTVQRPGQTC[Carbamidomethyl (C)]QPILEEQC[Carbamidomethyl (C)]LVPDSSHC[Carbamidomethyl (C)]QVLLLPLFAEC[Carbamidomethyl (C)]HK_	P04275	0.878028	0.878028	8.12898e-09	2.38882e-08	38	P04275	VWF	von Willebrand factor	VWF_HUMAN	1	83.7862	1.83786	Dengue	QC	NaN	NaN	NaN	30.4961	0.165536
Dengue / QC	_NTLIIYLDKVSHSEDDC[Carbamidomethyl (C)]LAFK_	P01024	0.60757	0.60757	8.20374e-09	2.40953e-08	146	P01024	C3	Complement C3	CO3_HUMAN	1	52.369	1.52369	Dengue	QC	NaN	NaN	NaN	128.947	0.10752
Dengue / QC	_ELSYYSLEDLNNK_	P01031	0.309933	0.309933	8.2255e-09	2.41465e-08	102	P01031	C5	Complement C5	CO5_HUMAN	1	23.965	1.23965	Dengue	QC	NaN	NaN	NaN	85.4488	0.0802899
Dengue / QC	_VTM[Oxidation (M)]TEDTSTDTAYMELSSLR_	A0A0C4DH33	0.69396	0.69396	8.25899e-09	2.42321e-08	44	A0A0C4DH33	IGHV1-24	Immunoglobulin heavy variable 1-24	HV124_HUMAN	1	61.7718	1.61772	Dengue	QC	NaN	NaN	NaN	19.7408	0.551903
Dengue / QC	_C[Carbamidomethyl (C)]LVNLIEK_	B4E1Z4	0.355888	0.355888	8.31215e-09	2.43626e-08	76	B4E1Z4	NaN	cDNA FLJ55673, highly similar to Complement factor B (EC 3.4.21.47)	B4E1Z4_HUMAN	1	27.9773	1.27977	Dengue	QC	NaN	NaN	NaN	62.6947	0.0769593
Dengue / QC	_C[Carbamidomethyl (C)]VNSPGSFR_	P23142	1.10964	1.10964	8.37329e-09	2.4529e-08	62	P23142	FBLN1	Fibulin-1	FBLN1_HUMAN	1	115.792	2.15792	Dengue	QC	NaN	NaN	NaN	49.6419	0.168875
Dengue / QC	_SVDEALR_	P32119	1.28879	1.28879	8.38601e-09	2.45534e-08	112	P32119	PRDX2	Peroxiredoxin-2	PRDX2_HUMAN	1	144.323	2.44323	Dengue	QC	NaN	NaN	NaN	78.1531	0.128026
Dengue / QC	_SDVVYTDWK_	P02763	-0.469793	0.469793	8.54792e-09	2.49883e-08	176	P02763	ORM1	Alpha-1-acid glycoprotein 1	A1AG1_HUMAN	1	-27.7932	0.722068	Dengue	QC	NaN	NaN	NaN	81.9901	0.0755578
Dengue / QC	_RYKAAFTEC[Carbamidomethyl (C)]C[Carbamidomethyl (C)]QAADK_	P02768	3.50904	3.50904	8.77689e-09	2.56042e-08	50	P02768	ALB	Serum albumin	ALBU_HUMAN	1	1038.48	11.3848	Dengue	QC	NaN	NaN	NaN	29.6326	0.382615
Dengue / QC	_AVLTIDEK_	P01009	-0.54114	0.54114	8.94614e-09	2.60573e-08	176	P01009	SERPINA1	Alpha-1-antitrypsin	A1AT_HUMAN	1	-31.2772	0.687228	Dengue	QC	NaN	NaN	NaN	72.9213	0.0805615
Dengue / QC	_SDGSENFNR_	Q08830	1.56762	1.56762	9.03621e-09	2.62885e-08	20	Q08830	FGL1	Fibrinogen-like protein 1	FGL1_HUMAN	1	196.415	2.96415	Dengue	QC	NaN	NaN	NaN	15.1563	0.185336
Dengue / QC	_NNNEKDM[Oxidation (M)]ALTAFVLISLQEAK_	P01024	-1.11955	1.11955	9.03959e-09	2.62885e-08	26	P01024	C3	Complement C3	CO3_HUMAN	1	-53.9761	0.460239	Dengue	QC	NaN	NaN	NaN	8.48733	0.332922
Dengue / QC	_EFQLFSSPHGK_	P02787	-0.392434	0.392434	9.14519e-09	2.6568e-08	176	P02787	TF	Serotransferrin	TRFE_HUMAN	1	-23.8157	0.761843	Dengue	QC	NaN	NaN	NaN	109.701	0.0634455
Dengue / QC	_AKLPDATPK_	P02774;P02774-3	1.1244	1.1244	9.62793e-09	2.78981e-08	62	P02774;P02774-3	GC	Vitamin D-binding protein;Isoform 3 of Vitamin D-binding protein	VTDB_HUMAN	1	118.011	2.18011	Dengue	QC	NaN	NaN	NaN	40.3151	0.17127
Dengue / QC	_C[Carbamidomethyl (C)]RGQSISVTSIRPC[Carbamidomethyl (C)]AAETQ_	P10643	1.21317	1.21317	9.675e-09	2.802e-08	102	P10643	C7	Complement component C7	CO7_HUMAN	1	131.846	2.31846	Dengue	QC	NaN	NaN	NaN	86.7459	0.170273
Dengue / QC	_GGSTSYGTGSETESPR_	P02671	2.19956	2.19956	1.0167e-08	2.93993e-08	118	P02671	FGA	Fibrinogen alpha chain	FIBA_HUMAN	1	359.341	4.59341	Dengue	QC	NaN	NaN	NaN	86.2842	0.32649
Dengue / QC	_TEDTALYYC[Carbamidomethyl (C)]AK_	A0A0B4J1X8	-0.464759	0.464759	1.03432e-08	2.98319e-08	176	A0A0B4J1X8	IGHV3-43	Immunoglobulin heavy variable 3-43	HV343_HUMAN	1	-27.5408	0.724592	Dengue	QC	NaN	NaN	NaN	99.6966	0.087594
Dengue / QC	_LGPNYLHIPVNC[Carbamidomethyl (C)]PYR_	P04040	1.46422	1.46422	1.03526e-08	2.98324e-08	48	P04040	CAT	Catalase	CATA_HUMAN	1	175.914	2.75914	Dengue	QC	NaN	NaN	NaN	25.5416	0.172852
Dengue / QC	_TVGSDTFYSFKYEIKEGDC[Carbamidomethyl (C)]PVQSGK_	P01042	1.01634	1.01634	1.0401e-08	2.99457e-08	86	P01042	KNG1	Kininogen-1	KNG1_HUMAN	1	102.278	2.02278	Dengue	QC	NaN	NaN	NaN	74.2892	0.142294
Dengue / QC	_TSC[Carbamidomethyl (C)]LLFMGR_	P05546	0.439983	0.439983	1.05595e-08	3.0362e-08	128	P05546	SERPIND1	Heparin cofactor 2	HEP2_HUMAN	1	35.6588	1.35659	Dengue	QC	NaN	NaN	NaN	110.194	0.0902563
Dengue / QC	_QRPPDLDTSSNAVDLLFFTDESGDSR_	B4DPQ0	0.642529	0.642529	1.06556e-08	3.0607e-08	124	B4DPQ0	C1R	Complement C1r subcomponent	B4DPQ0_HUMAN	1	56.1063	1.56106	Dengue	QC	NaN	NaN	NaN	96.6117	0.110338
Dengue / QC	_SNFLNC[Carbamidomethyl (C)]YVSGFHPSDIEVDLLK_	P61769	1.04759	1.04759	1.06675e-08	3.06195e-08	108	P61769	B2M	Beta-2-microglobulin	B2MG_HUMAN	1	106.707	2.06707	Dengue	QC	NaN	NaN	NaN	87.2419	0.169135
Dengue / QC	_LFLEPTQADIALLK_	P08519	1.00911	1.00911	1.06709e-08	3.06195e-08	104	P08519	LPA	Apolipoprotein(a)	APOA_HUMAN	1	101.266	2.01266	Dengue	QC	NaN	NaN	NaN	80.119	0.113386
Dengue / QC	_TRPHWC[Carbamidomethyl (C)]C[Carbamidomethyl (C)]TR_	Q16610	1.70348	1.70348	1.08296e-08	3.10431e-08	36	Q16610	ECM1	Extracellular matrix protein 1	ECM1_HUMAN	1	225.686	3.25686	Dengue	QC	NaN	NaN	NaN	29.7109	0.222406
Dengue / QC	_IPKSDVVYTDWK_	P02763	1.31055	1.31055	1.1645e-08	3.3143e-08	38	P02763	ORM1	Alpha-1-acid glycoprotein 1	A1AG1_HUMAN	1	148.037	2.48037	Dengue	QC	NaN	NaN	NaN	33.4482	0.14444
Dengue / QC	_AFLEVNEEGSEAAASTAVVIAGR_	P01008	0.75747	0.75747	1.19318e-08	3.38218e-08	162	P01008	SERPINC1	Antithrombin-III	ANT3_HUMAN	1	69.0523	1.69052	Dengue	QC	NaN	NaN	NaN	117.336	0.104921
Dengue / QC	_DSDWPFC[Carbamidomethyl (C)]SDEDWNYK_	P02671	2.81257	2.81257	1.20834e-08	3.41998e-08	42	P02671	FGA	Fibrinogen alpha chain	FIBA_HUMAN	1	602.536	7.02536	Dengue	QC	NaN	NaN	NaN	25.0904	0.276194
Dengue / QC	_YVLSPYKLNLVATPLFLKPGIPYPIK_	P01031	0.737898	0.737898	1.23479e-08	3.48768e-08	60	P01031	C5	Complement C5	CO5_HUMAN	1	66.7744	1.66774	Dengue	QC	NaN	NaN	NaN	31.6644	0.120697
Dengue / QC	_NTLELSNGVIVK_	P04114	0.599048	0.599048	1.23765e-08	3.49234e-08	104	P04114	APOB	Apolipoprotein B-100	APOB_HUMAN	1	51.4717	1.51472	Dengue	QC	NaN	NaN	NaN	96.2833	0.108692
Dengue / QC	_YTTFEYPNTISFSC[Carbamidomethyl (C)]NTGFYLNGADSAK_	P02749	0.840125	0.840125	1.2548e-08	3.53717e-08	146	P02749	APOH	Beta-2-glycoprotein 1	APOH_HUMAN	1	79.0206	1.79021	Dengue	QC	NaN	NaN	NaN	63.2212	0.117292
Dengue / QC	_EVEGQILGTYVC[Carbamidomethyl (C)]IK_	P20851;P20851-2	0.702005	0.702005	1.27639e-08	3.59081e-08	156	P20851;P20851-2	C4BPB	C4b-binding protein beta chain;Isoform 2 of C4b-binding protein beta chain	C4BPB_HUMAN	1	62.6764	1.62676	Dengue	QC	NaN	NaN	NaN	116.889	0.102549
Dengue / QC	_KPIWLSQMSC[Carbamidomethyl (C)]SGR_	O43866	-0.396965	0.396965	1.28852e-08	3.62131e-08	174	O43866	CD5L	CD5 antigen-like	CD5L_HUMAN	1	-24.0546	0.759454	Dengue	QC	NaN	NaN	NaN	105.628	0.0656484
Dengue / QC	_C[Carbamidomethyl (C)]QIAGWGHLDENVSGYSSSLR_	Q04756	0.509984	0.509984	1.30008e-08	3.65013e-08	90	Q04756	HGFAC	Hepatocyte growth factor activator	HGFA_HUMAN	1	42.4035	1.42403	Dengue	QC	NaN	NaN	NaN	63.6549	0.0776801
Dengue / QC	_GLEWIGEIYHSGSTNYNPSLK_	A0A075B6R2	-0.0886222	0.0886222	1.33767e-08	3.74815e-08	74	A0A075B6R2	IGHV4-4	Immunoglobulin heavy variable 4-4	HV404_HUMAN	1	-5.95795	0.94042	Dengue	QC	NaN	NaN	NaN	24.3067	0.195954
Dengue / QC	_LSGALHVYSLGSD_	P80108	1.00633	1.00633	1.39792e-08	3.90644e-08	46	P80108	GPLD1	Phosphatidylinositol-glycan-specific phospholipase D	PHLD_HUMAN	1	100.88	2.0088	Dengue	QC	NaN	NaN	NaN	32.3195	0.109666
Dengue / QC	_VEPYGENFNK_	P06727	1.30278	1.30278	1.41989e-08	3.9548e-08	28	P06727	APOA4	Apolipoprotein A-IV	APOA4_HUMAN	1	146.704	2.46704	Dengue	QC	NaN	NaN	NaN	18.4295	0.170166
Dengue / QC	_KLISVDTEHSNIYLQNGPDRIGR_	P00450	1.07356	1.07356	1.44648e-08	4.02088e-08	108	P00450	CP	Ceruloplasmin	CERU_HUMAN	1	110.462	2.10462	Dengue	QC	NaN	NaN	NaN	78.6386	0.1318
Dengue / QC	_FRVVSVDENFRPR_	P20742	2.11358	2.11358	1.45696e-08	4.046e-08	98	P20742	PZP	Pregnancy zone protein	PZP_HUMAN	1	332.763	4.32763	Dengue	QC	NaN	NaN	NaN	70.1127	0.333857
Dengue / QC	_TPENFPC[Carbamidomethyl (C)]KNLDENYC[Carbamidomethyl (C)]R_	P00747	1.83154	1.83154	1.46402e-08	4.06357e-08	40	P00747	PLG	Plasminogen	PLMN_HUMAN	1	255.918	3.55918	Dengue	QC	NaN	NaN	NaN	20.8965	0.186473
Dengue / QC	_TDC[Carbamidomethyl (C)]LSLPSFENAIPMGEK_	P08603	0.380961	0.380961	1.51971e-08	4.20566e-08	172	P08603	CFH	Complement factor H	CFAH_HUMAN	1	30.2209	1.30221	Dengue	QC	NaN	NaN	NaN	107.658	0.0628006
Dengue / QC	_DVYKAGEQVTYTC[Carbamidomethyl (C)]ATYYK_	P08603	0.773098	0.773098	1.5623e-08	4.31712e-08	74	P08603	CFH	Complement factor H	CFAH_HUMAN	1	70.8936	1.70894	Dengue	QC	NaN	NaN	NaN	48.3851	0.122687
Dengue / QC	_DTEEEDFHVDQATTVKVPMMK_	A0A024R6I7	0.659718	0.659718	1.56775e-08	4.32791e-08	110	A0A024R6I7	SERPINA1	Alpha-1-antitrypsin	A0A024R6I7_HUMAN	1	57.9774	1.57977	Dengue	QC	NaN	NaN	NaN	99.7728	0.1055
Dengue / QC	_IVEGSDAEIGMSPWQVMLFR_	P00734	0.546617	0.546617	1.60645e-08	4.42821e-08	176	P00734	F2	Prothrombin	THRB_HUMAN	1	46.0656	1.46066	Dengue	QC	NaN	NaN	NaN	114.903	0.0806825
Dengue / QC	_QEALELMNQNLDIYEQQVMTAAQK_	P43251;P43251-2;P43251-3;P43251-4	1.07191	1.07191	1.60837e-08	4.43133e-08	34	P43251;P43251-2;P43251-3;P43251-4	BTD	Biotinidase;Isoform 2 of Biotinidase;Isoform 3 of Biotinidase;Isoform 4 of Biotinidase	BTD_HUMAN	1	110.221	2.10221	Dengue	QC	NaN	NaN	NaN	14.4686	0.112605
Dengue / QC	_GVPIPNKVIFIR_	P01023	-0.540124	0.540124	1.62569e-08	4.47024e-08	176	P01023	A2M	Alpha-2-macroglobulin	A2MG_HUMAN	1	-31.2288	0.687712	Dengue	QC	NaN	NaN	NaN	122.425	0.0762448
Dengue / QC	_VGLSGMAIADVTLLSGFHALRADLEK_	P0C0L5	0.820263	0.820263	1.63049e-08	4.48125e-08	34	P0C0L5	C4B	Complement C4-B	CO4B_HUMAN	1	76.5728	1.76573	Dengue	QC	NaN	NaN	NaN	15.5441	0.270441
Dengue / QC	_DTSISTAYMELSR[Methyl (KR)]_	P23083	0.716161	0.716161	1.6327e-08	4.48513e-08	66	P23083	IGHV1-2	Immunoglobulin heavy variable 1-2	HV102_HUMAN	1	64.2804	1.6428	Dengue	QC	NaN	NaN	NaN	59.9372	0.113405
Dengue / QC	_YGQPLPGYTTK_	A6XND0;P17936;P17936-2	0.747429	0.747429	1.6618e-08	4.55691e-08	30	A6XND0;P17936;P17936-2	IGFBP3	Insulin-like growth factor-binding protein 3;Insulin-like growth factor-binding protein 3;Isoform 2 of Insulin-like growth factor-binding protein 3	A6XND0_HUMAN;IBP3_HUMAN;IBP3_HUMAN	1	67.8799	1.6788	Dengue	QC	NaN	NaN	NaN	20.9605	0.101771
Dengue / QC	_STDTSC[Carbamidomethyl (C)]VNPPTVQNAHILSR_	Q03591	0.935139	0.935139	1.66933e-08	4.57452e-08	100	Q03591	CFHR1	Complement factor H-related protein 1	FHR1_HUMAN	1	91.2075	1.91207	Dengue	QC	NaN	NaN	NaN	68.4428	0.131741
Dengue / QC	_KLFDYC[Carbamidomethyl (C)]DIPLC[Carbamidomethyl (C)]ASSSFDC[Carbamidomethyl (C)]GKPQVEPK_	P08519	1.5639	1.5639	1.69312e-08	4.63294e-08	40	P08519	LPA	Apolipoprotein(a)	APOA_HUMAN	1	195.652	2.95652	Dengue	QC	NaN	NaN	NaN	32.4469	0.236974
Dengue / QC	_KGYTQQLAFR_	P01024	-0.465067	0.465067	1.74113e-08	4.75965e-08	174	P01024	C3	Complement C3	CO3_HUMAN	1	-27.5563	0.724437	Dengue	QC	NaN	NaN	NaN	101.475	0.0789007
Dengue / QC	_ASQHGSDVVIETDFGLR_	Q9Y6R7	1.90092	1.90092	1.74838e-08	4.77715e-08	70	Q9Y6R7	FCGBP	IgGFc-binding protein	FCGBP_HUMAN	1	273.452	3.73452	Dengue	QC	NaN	NaN	NaN	54.3373	0.261415
Dengue / QC	_SSSNEEVMFLTVQVKGPTQEFK_	P01023	1.5292	1.5292	1.79136e-08	4.88742e-08	70	P01023	A2M	Alpha-2-macroglobulin	A2MG_HUMAN	1	188.626	2.88626	Dengue	QC	NaN	NaN	NaN	37.2364	0.185399
Dengue / QC	_FSC[Carbamidomethyl (C)]MC[Carbamidomethyl (C)]PQGYQVVR_	Q12805;Q12805-2;Q12805-4	1.0641	1.0641	1.79601e-08	4.89773e-08	86	Q12805;Q12805-2;Q12805-4	EFEMP1	EGF-containing fibulin-like extracellular matrix protein 1;Isoform 2 of EGF-containing fibulin-like extracellular matrix protein 1;Isoform 4 of EGF-containing fibulin-like extracellular matrix protein 1	FBLN3_HUMAN	1	109.087	2.09087	Dengue	QC	NaN	NaN	NaN	58.9685	0.162115
Dengue / QC	_SLR[Dimethyl (KR)]SDDTAVYYC[Carbamidomethyl (C)]AR_	A0A0C4DH31	-0.0847495	0.0847495	1.8313e-08	4.98912e-08	54	A0A0C4DH31	IGHV1-18	Immunoglobulin heavy variable 1-18	HV118_HUMAN	1	-5.70518	0.942948	Dengue	QC	NaN	NaN	NaN	25.1019	1.055
Dengue / QC	_LPQQANDYLNSFNWER_	P04114	1.12809	1.12809	1.83789e-08	5.0022e-08	34	P04114	APOB	Apolipoprotein B-100	APOB_HUMAN	1	118.57	2.1857	Dengue	QC	NaN	NaN	NaN	21.9269	0.139144
Dengue / QC	_FKTGTTLKYTC[Carbamidomethyl (C)]LPGYVR_	P04003	1.30345	1.30345	1.84721e-08	5.02514e-08	124	P04003	C4BPA	C4b-binding protein alpha chain	C4BPA_HUMAN	1	146.819	2.46819	Dengue	QC	NaN	NaN	NaN	97.62	0.183091
Dengue / QC	_LEPYADQLR_	P06727	0.542144	0.542144	1.9003e-08	5.15454e-08	114	P06727	APOA4	Apolipoprotein A-IV	APOA4_HUMAN	1	45.6135	1.45613	Dengue	QC	NaN	NaN	NaN	97.0391	0.100334
Dengue / QC	_GISLANWMC[Carbamidomethyl (C)]LAK_	P61626	0.990395	0.990395	1.90266e-08	5.15845e-08	50	P61626	LYZ	Lysozyme C	LYSC_HUMAN	1	98.6729	1.98673	Dengue	QC	NaN	NaN	NaN	42.0083	0.139049
Dengue / QC	_LEALPNSLLAPLGR_	P35858;P35858-2	0.46159	0.46159	1.91466e-08	5.18597e-08	74	P35858;P35858-2	IGFALS	Insulin-like growth factor-binding protein complex acid labile subunit;Isoform 2 of Insulin-like growth factor-binding protein complex acid labile subunit	ALS_HUMAN	1	37.7058	1.37706	Dengue	QC	NaN	NaN	NaN	55.4204	0.0794363
Dengue / QC	_EWFWDLATGTMKER_	P02790	0.497087	0.497087	1.94563e-08	5.25967e-08	120	P02790	HPX	Hemopexin	HEMO_HUMAN	1	41.1361	1.41136	Dengue	QC	NaN	NaN	NaN	44.6533	0.078742
Dengue / QC	_YDYC[Carbamidomethyl (C)]DILEC[Carbamidomethyl (C)]EEEC[Carbamidomethyl (C)]MHC[Carbamidomethyl (C)]SGENYDGKISK_	P00747	2.688	2.688	1.97252e-08	5.32722e-08	38	P00747	PLG	Plasminogen	PLMN_HUMAN	1	544.419	6.44419	Dengue	QC	NaN	NaN	NaN	28.3474	0.30821
Dengue / QC	_EC[Carbamidomethyl (C)]NNPPPSGGGR_	P10643	0.723974	0.723974	1.98336e-08	5.35393e-08	98	P10643	C7	Complement component C7	CO7_HUMAN	1	65.1726	1.65173	Dengue	QC	NaN	NaN	NaN	92.7274	0.132618
Dengue / QC	_SEDC[Carbamidomethyl (C)]FILDHGK_	P06396	0.532531	0.532531	1.99425e-08	5.38072e-08	64	P06396	GSN	Gelsolin	GELS_HUMAN	1	44.6465	1.44646	Dengue	QC	NaN	NaN	NaN	52.6405	0.081365
Dengue / QC	_QRAAC[Carbamidomethyl (C)]AQLNDFLQEYGTQGC[Carbamidomethyl (C)]QV_	P0C0L5	2.27526	2.27526	2.04763e-08	5.5221e-08	40	P0C0L5	C4B	Complement C4-B	CO4B_HUMAN	1	384.084	4.84084	Dengue	QC	NaN	NaN	NaN	27.7598	0.282282
Dengue / QC	_AQTTVTC[Carbamidomethyl (C)]MENGWSPTPR_	P08603	0.340754	0.340754	2.1037e-08	5.65968e-08	176	P08603	CFH	Complement factor H	CFAH_HUMAN	1	26.6418	1.26642	Dengue	QC	NaN	NaN	NaN	130.399	0.0532853
Dengue / QC	_TLVLLMGK_	P07737	1.34211	1.34211	2.10606e-08	5.66331e-08	38	P07737	PFN1	Profilin-1	PROF1_HUMAN	1	153.521	2.53521	Dengue	QC	NaN	NaN	NaN	28.3629	0.183306
Dengue / QC	_QGENGQMMSC[Carbamidomethyl (C)]TC[Carbamidomethyl (C)]LGNGKGEFK_	P02751;P02751-15;P02751-3;P02751-7	1.52486	1.52486	2.13326e-08	5.73096e-08	30	P02751;P02751-15;P02751-3;P02751-7	FN1	Fibronectin;Isoform 15 of Fibronectin;Isoform 3 of Fibronectin;Isoform 7 of Fibronectin	FINC_HUMAN	1	187.759	2.87759	Dengue	QC	NaN	NaN	NaN	17.4679	0.139759
Dengue / QC	_GEAFTLKATVLNYLPKC[Carbamidomethyl (C)]IR_	P01023	0.9965	0.9965	2.15313e-08	5.77604e-08	74	P01023	A2M	Alpha-2-macroglobulin	A2MG_HUMAN	1	99.5154	1.99515	Dengue	QC	NaN	NaN	NaN	63.9498	0.14149
Dengue / QC	_LGNWSAMPSC[Carbamidomethyl (C)]K_	P02749	1.29897	1.29897	2.15802e-08	5.78362e-08	50	P02749	APOH	Beta-2-glycoprotein 1	APOH_HUMAN	1	146.054	2.46054	Dengue	QC	NaN	NaN	NaN	21.1916	0.145627
Dengue / QC	_NALTGLPPGLFQASATLDTLVLK_	P02750	0.570675	0.570675	2.20034e-08	5.88296e-08	112	P02750	LRG1	Leucine-rich alpha-2-glycoprotein	A2GL_HUMAN	1	48.5219	1.48522	Dengue	QC	NaN	NaN	NaN	87.0803	0.113354
Dengue / QC	_LYPIANGNNQSPVDIK_	P00915	1.59704	1.59704	2.26945e-08	6.04181e-08	46	P00915	CA1	Carbonic anhydrase 1	CAH1_HUMAN	1	202.521	3.02521	Dengue	QC	NaN	NaN	NaN	38.1074	0.226305
Dengue / QC	_KC[Carbamidomethyl (C)]QC[Carbamidomethyl (C)]DELC[Carbamidomethyl (C)]SYYQSC[Carbamidomethyl (C)]C[Carbamidomethyl (C)]TDYTAEC[Carbamidomethyl (C)]KPQVTR_	P04004	0.461364	0.461364	2.32807e-08	6.18025e-08	54	P04004	VTN	Vitronectin	VTNC_HUMAN	1	37.6843	1.37684	Dengue	QC	NaN	NaN	NaN	40.843	0.0776276
Dengue / QC	_NQGILEFYGDDIALLK_	B4E1Z4	1.05564	1.05564	2.33854e-08	6.19923e-08	42	B4E1Z4	NaN	cDNA FLJ55673, highly similar to Complement factor B (EC 3.4.21.47)	B4E1Z4_HUMAN	1	107.865	2.07865	Dengue	QC	NaN	NaN	NaN	33.0153	0.10677
Dengue / QC	_VDVQAGAC[Carbamidomethyl (C)]EGKLELSVDGAK_	P0C0L5	0.875173	0.875173	2.39834e-08	6.34276e-08	106	P0C0L5	C4B	Complement C4-B	CO4B_HUMAN	1	83.4228	1.83423	Dengue	QC	NaN	NaN	NaN	96.511	0.136748
Dengue / QC	_VTSTLTIK_	P01871	-0.500394	0.500394	2.45462e-08	6.4763e-08	174	P01871	IGHM	Immunoglobulin heavy constant mu	IGHM_HUMAN	1	-29.3086	0.706914	Dengue	QC	NaN	NaN	NaN	82.8392	0.0840122
Dengue / QC	_VFREFHLHLRLPMSVR_	P0C0L5	0.884026	0.884026	2.47021e-08	6.50824e-08	98	P0C0L5	C4B	Complement C4-B	CO4B_HUMAN	1	84.5518	1.84552	Dengue	QC	NaN	NaN	NaN	86.8179	0.137241
Dengue / QC	_SLFTDLVAEK_	P20742	3.43451	3.43451	2.46871e-08	6.50824e-08	40	P20742	PZP	Pregnancy zone protein	PZP_HUMAN	1	981.163	10.8116	Dengue	QC	NaN	NaN	NaN	31.6839	0.505642
Dengue / QC	_VKENFDKAR_	P02753;Q5VY30	2.3158	2.3158	2.47219e-08	6.51042e-08	74	P02753;Q5VY30	RBP4	Retinol-binding protein 4;Retinol binding protein 4, plasma, isoform CRA_b	RET4_HUMAN;Q5VY30_HUMAN	1	397.879	4.97879	Dengue	QC	NaN	NaN	NaN	66.412	0.319403
Dengue / QC	_K[Dimethyl (KR)]YAYWYQQK_	A0A075B6K4	0.801206	0.801206	2.48011e-08	6.52819e-08	118	A0A075B6K4	IGLV3-10	Immunoglobulin lambda variable 3-10	LV310_HUMAN	1	74.2557	1.74256	Dengue	QC	NaN	NaN	NaN	88.5806	0.186889
Dengue / QC	_RLPFIC[Carbamidomethyl (C)]SY_	P13727	3.20452	3.20452	2.50985e-08	6.60029e-08	24	P13727	PRG2	Bone marrow proteoglycan	PRG2_HUMAN	1	821.843	9.21843	Dengue	QC	NaN	NaN	NaN	13.7988	0.294946
Dengue / QC	_AITPPHPASQANIIFDITEGNLRDSFDIIKR_	P23142	0.996717	0.996717	2.54164e-08	6.66824e-08	56	P23142	FBLN1	Fibulin-1	FBLN1_HUMAN	1	99.5454	1.99545	Dengue	QC	NaN	NaN	NaN	47.4347	0.137268
Dengue / QC	_FATTFYQHLADSKNDNDNIFLSPLSISTAFAMTK_	P01008	0.819669	0.819669	2.58691e-08	6.77115e-08	102	P01008	SERPINC1	Antithrombin-III	ANT3_HUMAN	1	76.5001	1.765	Dengue	QC	NaN	NaN	NaN	63.2744	0.140651
Dengue / QC	_SGIPIVTSPYQIHFTKTPK_	P01024	1.62937	1.62937	2.59245e-08	6.77931e-08	124	P01024	C3	Complement C3	CO3_HUMAN	1	209.378	3.09378	Dengue	QC	NaN	NaN	NaN	103.668	0.225145
Dengue / QC	_LVTDLTKVHTEC[Carbamidomethyl (C)]C[Carbamidomethyl (C)]HGDLLEC[Carbamidomethyl (C)]ADDRADLAK_	P02768	1.38341	1.38341	2.63222e-08	6.87691e-08	172	P02768	ALB	Serum albumin	ALBU_HUMAN	1	160.885	2.60885	Dengue	QC	NaN	NaN	NaN	145.009	0.21739
Dengue / QC	_IDSLLENDR_	P10909;P10909-2;P10909-4;P10909-5	0.554426	0.554426	2.6951e-08	7.02481e-08	70	P10909;P10909-2;P10909-4;P10909-5	CLU	Clusterin;Isoform 2 of Clusterin;Isoform 4 of Clusterin;Isoform 5 of Clusterin	CLUS_HUMAN	1	46.8584	1.46858	Dengue	QC	NaN	NaN	NaN	48.6916	0.0699239
Dengue / QC	_C[Carbamidomethyl (C)]C[Carbamidomethyl (C)]AAADPHEC[Carbamidomethyl (C)]YAKVFDEFKPLVEEPQNLIK_	P02768	1.56575	1.56575	2.71259e-08	7.06384e-08	40	P02768	ALB	Serum albumin	ALBU_HUMAN	1	196.03	2.9603	Dengue	QC	NaN	NaN	NaN	24.3299	0.366188
Dengue / QC	_VSNKGLPSSIEK_	P01861	1.71643	1.71643	2.71656e-08	7.07087e-08	164	P01861	IGHG4	Immunoglobulin heavy constant gamma 4	IGHG4_HUMAN	1	228.622	3.28622	Dengue	QC	NaN	NaN	NaN	112.727	0.254966
Dengue / QC	_YSFTIELR_	A0A087WSY5;Q96IY4	0.516694	0.516694	2.74113e-08	7.13151e-08	134	A0A087WSY5;Q96IY4	CPB2	Carboxypeptidase B2	A0A087WSY5_HUMAN;CBPB2_HUMAN	1	43.0673	1.43067	Dengue	QC	NaN	NaN	NaN	67.961	0.110284
Dengue / QC	_DAHLTWEVAGK_	A0A0A0MS09;P01880;P01880-2	1.70657	1.70657	2.75125e-08	7.15454e-08	18	A0A0A0MS09;P01880;P01880-2	IGHD	Immunoglobulin heavy constant delta (Fragment);Immunoglobulin heavy constant delta;Isoform 2 of Immunoglobulin heavy constant delta	A0A0A0MS09_HUMAN;IGHD_HUMAN;IGHD_HUMAN	1	226.383	3.26383	Dengue	QC	NaN	NaN	NaN	13.4698	0.204033
Dengue / QC	_STGSWSTLKTQDQK_	B4E1Z4	1.86767	1.86767	2.75904e-08	7.17145e-08	146	B4E1Z4	NaN	cDNA FLJ55673, highly similar to Complement factor B (EC 3.4.21.47)	B4E1Z4_HUMAN	1	264.943	3.64943	Dengue	QC	NaN	NaN	NaN	111.593	0.299008
Dengue / QC	_GSVFLRNPSRNNVPC[Carbamidomethyl (C)]SPK_	P0C0L5	1.0704	1.0704	2.87666e-08	7.45987e-08	96	P0C0L5	C4B	Complement C4-B	CO4B_HUMAN	1	110.002	2.10002	Dengue	QC	NaN	NaN	NaN	73.4121	0.146178
Dengue / QC	_LVNIAVDER_	A0A0C4DFP6;Q9NQ79;Q9NQ79-2	0.576555	0.576555	2.9949e-08	7.74142e-08	120	A0A0C4DFP6;Q9NQ79;Q9NQ79-2	CRTAC1	Cartilage acidic protein 1;Cartilage acidic protein 1;Isoform 2 of Cartilage acidic protein 1	A0A0C4DFP6_HUMAN;CRAC1_HUMAN;CRAC1_HUMAN	1	49.1284	1.49128	Dengue	QC	NaN	NaN	NaN	70.4301	0.099961
Dengue / QC	_VLNYVDWIK_	B4DPQ0	0.624173	0.624173	3.02478e-08	7.81146e-08	68	B4DPQ0	C1R	Complement C1r subcomponent	B4DPQ0_HUMAN	1	54.1327	1.54133	Dengue	QC	NaN	NaN	NaN	50.5659	0.103551
Dengue / QC	_VTISVDK_	A0A075B6R2	0.697051	0.697051	3.04215e-08	7.84548e-08	100	A0A075B6R2	IGHV4-4	Immunoglobulin heavy variable 4-4	HV404_HUMAN	1	62.1188	1.62119	Dengue	QC	NaN	NaN	NaN	83.0158	0.11063
Dengue / QC	_EPAHLMSLFGGKPMIIYK_	P06396	0.445027	0.445027	3.06094e-08	7.8903e-08	118	P06396	GSN	Gelsolin	GELS_HUMAN	1	36.1339	1.36134	Dengue	QC	NaN	NaN	NaN	94.3883	0.0779991
Dengue / QC	_VSVLC[Carbamidomethyl (C)]QENYLIQEGEEITC[Carbamidomethyl (C)]K_	P08603	0.435224	0.435224	3.12936e-08	8.05185e-08	160	P08603	CFH	Complement factor H	CFAH_HUMAN	1	35.2121	1.35212	Dengue	QC	NaN	NaN	NaN	117.812	0.0680725
Dengue / QC	_LTVDKSRWQQGNIFSC[Carbamidomethyl (C)]SVMHEALHNR_	P01860	1.09189	1.09189	3.26374e-08	8.36689e-08	26	P01860	IGHG3	Immunoglobulin heavy constant gamma 3	IGHG3_HUMAN	1	113.154	2.13154	Dengue	QC	NaN	NaN	NaN	10.9626	0.629194
Dengue / QC	_AIAANEADAVTLDAGLVYDAYLAPNNLKPVVAEFYGSK_	P02787	0.421503	0.421503	3.2683e-08	8.37473e-08	172	P02787	TF	Serotransferrin	TRFE_HUMAN	1	33.9322	1.33932	Dengue	QC	NaN	NaN	NaN	85.3205	0.0883284
Dengue / QC	_TRRVDTVDPPYPR_	P04004	1.34183	1.34183	3.27504e-08	8.38435e-08	160	P04004	VTN	Vitronectin	VTNC_HUMAN	1	153.473	2.53473	Dengue	QC	NaN	NaN	NaN	144.426	0.203782
Dengue / QC	_SRWQQGNIFSC[Carbamidomethyl (C)]SVMHEALHNRFTQK_	P01860	1.89216	1.89216	3.2991e-08	8.43352e-08	62	P01860	IGHG3	Immunoglobulin heavy constant gamma 3	IGHG3_HUMAN	1	271.19	3.7119	Dengue	QC	NaN	NaN	NaN	53.0458	0.254982
Dengue / QC	_LM[Oxidation (M)]NIFLK_	P01024	0.842399	0.842399	3.30027e-08	8.43352e-08	42	P01024	C3	Complement C3	CO3_HUMAN	1	79.3029	1.79303	Dengue	QC	NaN	NaN	NaN	35.0069	0.1554
Dengue / QC	_GLASANVDFAFSLYKHLVALSPKK_	P08185	0.640378	0.640378	3.31006e-08	8.45083e-08	112	P08185	SERPINA6	Corticosteroid-binding globulin	CBG_HUMAN	1	55.8737	1.55874	Dengue	QC	NaN	NaN	NaN	74.0896	0.117559
Dengue / QC	_C[Carbamidomethyl (C)]LAFEC[Carbamidomethyl (C)]PENYRR_	P23142	0.792133	0.792133	3.43882e-08	8.75562e-08	162	P23142	FBLN1	Fibulin-1	FBLN1_HUMAN	1	73.1633	1.73163	Dengue	QC	NaN	NaN	NaN	151.873	0.121241
Dengue / QC	_GVAGGSVAVLC[Carbamidomethyl (C)]PYNR_	P01833	1.94016	1.94016	3.49747e-08	8.89689e-08	76	P01833	PIGR	Polymeric immunoglobulin receptor	PIGR_HUMAN	1	283.749	3.83749	Dengue	QC	NaN	NaN	NaN	52.5095	0.293643
Dengue / QC	_QSGSEC[Carbamidomethyl (C)]IC[Carbamidomethyl (C)]MSPEEDC[Carbamidomethyl (C)]SHHSEDLC[Carbamidomethyl (C)]VFDTDSNDYFTSPAC[Carbamidomethyl (C)]K_	P13671	0.746541	0.746541	3.63404e-08	9.22336e-08	116	P13671	C6	Complement component C6	CO6_HUMAN	1	67.7766	1.67777	Dengue	QC	NaN	NaN	NaN	75.0713	0.092156
Dengue / QC	_HHFPRHPNVFGFC[Carbamidomethyl (C)]R_	P04196	4.12308	4.12308	3.68013e-08	9.3361e-08	26	P04196	HRG	Histidine-rich glycoprotein	HRG_HUMAN	1	1642.5	17.425	Dengue	QC	NaN	NaN	NaN	15.5994	0.434217
Dengue / QC	_SALVLQYLRVPLVDR_	P00740	2.40563	2.40563	3.71148e-08	9.41136e-08	32	P00740	F9	Coagulation factor IX	FA9_HUMAN	1	429.865	5.29865	Dengue	QC	NaN	NaN	NaN	22.3823	0.16782
Dengue / QC	_EIPDEISILLLGVAHFK_	P36955	0.881639	0.881639	3.72501e-08	9.43713e-08	134	P36955	SERPINF1	Pigment epithelium-derived factor	PEDF_HUMAN	1	84.2467	1.84247	Dengue	QC	NaN	NaN	NaN	91.0438	0.110169
Dengue / QC	_SDVMYTDWK_	P19652	-0.370151	0.370151	3.75987e-08	9.52116e-08	176	P19652	ORM2	Alpha-1-acid glycoprotein 2	A1AG2_HUMAN	1	-22.6299	0.773701	Dengue	QC	NaN	NaN	NaN	97.2812	0.0590539
Dengue / QC	_YVGGQEHFAHLLILR_	P02763	-0.36906	0.36906	3.78593e-08	9.57519e-08	176	P02763	ORM1	Alpha-1-acid glycoprotein 1	A1AG1_HUMAN	1	-22.5713	0.774287	Dengue	QC	NaN	NaN	NaN	124.597	0.0638608
Dengue / QC	_ARANLQSVPHASASRPR_	O14791;O14791-2	1.29824	1.29824	3.79199e-08	9.58516e-08	36	O14791;O14791-2	APOL1	Apolipoprotein L1;Isoform 2 of Apolipoprotein L1	APOL1_HUMAN	1	145.928	2.45928	Dengue	QC	NaN	NaN	NaN	27.394	0.155406
Dengue / QC	_MAESGYDIALLK_	P03951	1.5396	1.5396	3.82252e-08	9.65363e-08	34	P03951	F11	Coagulation factor XI	FA11_HUMAN	1	190.714	2.90714	Dengue	QC	NaN	NaN	NaN	20.3489	0.195783
Dengue / QC	_VTGVVLFR_	P08294	0.988983	0.988983	3.89564e-08	9.81618e-08	80	P08294	SOD3	Extracellular superoxide dismutase [Cu-Zn]	SODE_HUMAN	1	98.4786	1.98479	Dengue	QC	NaN	NaN	NaN	60.508	0.170521
Dengue / QC	_LPLVPALDGC[Carbamidomethyl (C)]LR_	I3L145;P04278	1.54424	1.54424	4.02689e-08	1.01332e-07	28	I3L145;P04278	SHBG	Sex hormone-binding globulin	I3L145_HUMAN;SHBG_HUMAN	1	191.651	2.91651	Dengue	QC	NaN	NaN	NaN	14.7252	0.290349
Dengue / QC	_MGPTVSPIC[Carbamidomethyl (C)]LPGTSSDYNLM[Oxidation (M)]DGDLGLISGWGR_	P09871	0.893097	0.893097	4.04077e-08	1.01636e-07	74	P09871	C1S	Complement C1s subcomponent	C1S_HUMAN	1	85.7159	1.85716	Dengue	QC	NaN	NaN	NaN	32.8887	0.286212
Dengue / QC	_VGVETTKPSK_	A0M8Q6	1.1644	1.1644	4.04456e-08	1.01686e-07	108	A0M8Q6	IGLC7	Immunoglobulin lambda constant 7	IGLC7_HUMAN	1	124.141	2.24141	Dengue	QC	NaN	NaN	NaN	67.0927	0.251815
Dengue / QC	_TILDDLR_	P19823	0.802626	0.802626	4.10474e-08	1.0306e-07	42	P19823	ITIH2	Inter-alpha-trypsin inhibitor heavy chain H2	ITIH2_HUMAN	1	74.4273	1.74427	Dengue	QC	NaN	NaN	NaN	35.1281	0.144576
Dengue / QC	_AKVFKDVFLEMNIPYSVVR_	P01031	1.00353	1.00353	4.14032e-08	1.03814e-07	38	P01031	C5	Complement C5	CO5_HUMAN	1	100.49	2.0049	Dengue	QC	NaN	NaN	NaN	23.4062	0.137059
Dengue / QC	_ITTGGDVINNGLWNM[Oxidation (M)]VSVEELEHSISIK_	P07225	0.775065	0.775065	4.17024e-08	1.04517e-07	74	P07225	PROS1	Vitamin K-dependent protein S	PROS_HUMAN	1	71.1267	1.71127	Dengue	QC	NaN	NaN	NaN	33.5737	0.321811
Dengue / QC	_VTVSC[Carbamidomethyl (C)]SGGMSLEGPSAFLC[Carbamidomethyl (C)]GSSLK_	P10643	0.721026	0.721026	4.19476e-08	1.05085e-07	124	P10643	C7	Complement component C7	CO7_HUMAN	1	64.8353	1.64835	Dengue	QC	NaN	NaN	NaN	118.019	0.113946
Dengue / QC	_DGFDISGNPWIC[Carbamidomethyl (C)]DQNLSDLYR_	P02750	0.44346	0.44346	4.27769e-08	1.07066e-07	132	P02750	LRG1	Leucine-rich alpha-2-glycoprotein	A2GL_HUMAN	1	35.9862	1.35986	Dengue	QC	NaN	NaN	NaN	93.7586	0.10773
Dengue / QC	_IIPFNRLTIGEGQQHHLGGAK_	P02679;P02679-2	1.72925	1.72925	4.28092e-08	1.07099e-07	28	P02679;P02679-2	FGG	Fibrinogen gamma chain;Isoform Gamma-A of Fibrinogen gamma chain	FIBG_HUMAN	1	231.555	3.31555	Dengue	QC	NaN	NaN	NaN	20.8323	0.131541
Dengue / QC	_FFSLLSGSLNSHGLELNADILGTDKINSGAHK_	P04114	0.711192	0.711192	4.42681e-08	1.10404e-07	64	P04114	APOB	Apolipoprotein B-100	APOB_HUMAN	1	63.7156	1.63716	Dengue	QC	NaN	NaN	NaN	34.5916	0.132638
Dengue / QC	_HNEVWHLVGITSWGEGC[Carbamidomethyl (C)]AQR_	P03951	2.00096	2.00096	4.45805e-08	1.11134e-07	20	P03951	F11	Coagulation factor XI	FA11_HUMAN	1	300.267	4.00267	Dengue	QC	NaN	NaN	NaN	13.8079	0.218947
Dengue / QC	_SLWDFLK_	P04114	0.533393	0.533393	4.52079e-08	1.12648e-07	96	P04114	APOB	Apolipoprotein B-100	APOB_HUMAN	1	44.7329	1.44733	Dengue	QC	NaN	NaN	NaN	64.8259	0.129583
Dengue / QC	_DSFHLDEQFTVPVEM[Oxidation (M)]MQAR_	P08697	0.678612	0.678612	4.55322e-08	1.13406e-07	84	P08697	SERPINF2	Alpha-2-antiplasmin	A2AP_HUMAN	1	60.0599	1.6006	Dengue	QC	NaN	NaN	NaN	76.2456	0.096466
Dengue / QC	_ASSIIDELFQDRFFTREPQDTYHYLPFSLPHR_	P10909;P10909-2;P10909-4;P10909-5	0.643704	0.643704	4.58231e-08	1.14079e-07	154	P10909;P10909-2;P10909-4;P10909-5	CLU	Clusterin;Isoform 2 of Clusterin;Isoform 4 of Clusterin;Isoform 5 of Clusterin	CLUS_HUMAN	1	56.2335	1.56234	Dengue	QC	NaN	NaN	NaN	109.936	0.112205
Dengue / QC	_NELIPLIYLENPRR_	P20742	2.00853	2.00853	4.6183e-08	1.14873e-07	136	P20742	PZP	Pregnancy zone protein	PZP_HUMAN	1	302.371	4.02371	Dengue	QC	NaN	NaN	NaN	95.066	0.320324
Dengue / QC	_NNNEKDMALTAFVLISLQEAK_	P01024	0.965754	0.965754	4.77467e-08	1.18343e-07	138	P01024	C3	Complement C3	CO3_HUMAN	1	95.3084	1.95308	Dengue	QC	NaN	NaN	NaN	106.807	0.1544
Dengue / QC	_TPENYPNAGLTR_	P08519	1.8671	1.8671	4.77912e-08	1.184e-07	80	P08519	LPA	Apolipoprotein(a)	APOA_HUMAN	1	264.799	3.64799	Dengue	QC	NaN	NaN	NaN	64.9267	0.300518
Dengue / QC	_QVPAHARDFHINLFQVLPWLK_	B4E1Z4	1.17072	1.17072	4.80638e-08	1.18918e-07	24	B4E1Z4	NaN	cDNA FLJ55673, highly similar to Complement factor B (EC 3.4.21.47)	B4E1Z4_HUMAN	1	125.124	2.25124	Dengue	QC	NaN	NaN	NaN	12.1556	0.143055
Dengue / QC	_LTGSC[Carbamidomethyl (C)]SYVLFQNK_	P04275	0.818334	0.818334	4.91052e-08	1.21315e-07	52	P04275	VWF	von Willebrand factor	VWF_HUMAN	1	76.3369	1.76337	Dengue	QC	NaN	NaN	NaN	40.4969	0.167467
Dengue / QC	_DRDGNTLTYYR_	P02748	-0.423203	0.423203	5.03431e-08	1.2401e-07	172	P02748	C9	Complement component C9	CO9_HUMAN	1	-25.4233	0.745767	Dengue	QC	NaN	NaN	NaN	80.4735	0.0710131
Dengue / QC	_DSGVPDRFSGSGSGTDFTLK_	P06310	-0.436402	0.436402	5.10037e-08	1.25527e-07	176	P06310	IGKV2-30	Immunoglobulin kappa variable 2-30	KV230_HUMAN	1	-26.1025	0.738975	Dengue	QC	NaN	NaN	NaN	103.95	0.0698949
Dengue / QC	_SNRVTVFPIGIGDRYDAAQLR_	P04275	1.28413	1.28413	5.27432e-08	1.29297e-07	92	P04275	VWF	von Willebrand factor	VWF_HUMAN	1	143.535	2.43535	Dengue	QC	NaN	NaN	NaN	61.8048	0.220851
Dengue / QC	_GVSAYLSRPSPFDLFIR_	A0A286YES5;P01854	3.72178	3.72178	5.32842e-08	1.30395e-07	30	A0A286YES5;P01854	IGHE	Immunoglobulin heavy constant epsilon (Fragment);Immunoglobulin heavy constant epsilon	A0A286YES5_HUMAN;IGHE_HUMAN	1	1219.37	13.1937	Dengue	QC	NaN	NaN	NaN	16.5662	0.359709
Dengue / QC	_C[Carbamidomethyl (C)]C[Carbamidomethyl (C)]QDGVTRLPMMR_	P0C0L5	1.29814	1.29814	5.35811e-08	1.31064e-07	174	P0C0L5	C4B	Complement C4-B	CO4B_HUMAN	1	145.912	2.45912	Dengue	QC	NaN	NaN	NaN	138.256	0.19734
Dengue / QC	_LPGDIQVVPIGVGPNANVQELER_	P04275	0.763858	0.763858	5.40467e-08	1.3203e-07	104	P04275	VWF	von Willebrand factor	VWF_HUMAN	1	69.8025	1.69803	Dengue	QC	NaN	NaN	NaN	95.6208	0.128333
Dengue / QC	_C[Carbamidomethyl (C)]FSSDFMAYDIAC[Carbamidomethyl (C)]DR_	O75882;O75882-2;O75882-3	0.565142	0.565142	5.41545e-08	1.32179e-07	46	O75882;O75882-2;O75882-3	ATRN	Attractin;Isoform 2 of Attractin;Isoform 3 of Attractin	ATRN_HUMAN	1	47.9533	1.47953	Dengue	QC	NaN	NaN	NaN	18.9216	0.102803
Dengue / QC	_GFQVVVTLR_	P09871	0.78207	0.78207	5.64529e-08	1.3731e-07	124	P09871	C1S	Complement C1s subcomponent	C1S_HUMAN	1	71.9596	1.7196	Dengue	QC	NaN	NaN	NaN	84.1335	0.132693
Dengue / QC	_LTVDKSRWQQGNVFSC[Carbamidomethyl (C)]SVMHEALHNHYTQK_	P01857	1.85677	1.85677	5.67106e-08	1.37817e-07	76	P01857	IGHG1	Immunoglobulin heavy constant gamma 1	IGHG1_HUMAN	1	262.195	3.62195	Dengue	QC	NaN	NaN	NaN	64.9753	0.374492
Dengue / QC	_LLIYGASIR[Dimethyl (KR)]_	A0A087WSY6	2.79041	2.79041	5.76646e-08	1.39953e-07	86	A0A087WSY6	IGKV3D-15	Immunoglobulin kappa variable 3D-15	KVD15_HUMAN	1	591.828	6.91828	Dengue	QC	NaN	NaN	NaN	59.4129	0.53209
Dengue / QC	_AGVETTTPSKQSNNKYAASSYLSLTPEQWK_	P0DOY2	1.4168	1.4168	5.94019e-08	1.43796e-07	160	P0DOY2	IGLC2	Immunoglobulin lambda constant 2	IGLC2_HUMAN	1	166.993	2.66993	Dengue	QC	NaN	NaN	NaN	146.185	0.245704
Dengue / QC	_RNPFVFAPTLLTVAVHFEEVAK_	P43652	0.918967	0.918967	5.98149e-08	1.44671e-07	126	P43652	AFM	Afamin	AFAM_HUMAN	1	89.0761	1.89076	Dengue	QC	NaN	NaN	NaN	63.8439	0.14911
Dengue / QC	_GLFIIDGK_	P32119	0.290727	0.290727	6.15382e-08	1.48518e-07	120	P32119	PRDX2	Peroxiredoxin-2	PRDX2_HUMAN	1	22.3257	1.22326	Dengue	QC	NaN	NaN	NaN	108.669	0.0605445
Dengue / QC	_AREDIFMETLK_	P25311	-0.349445	0.349445	6.1765e-08	1.48938e-07	170	P25311	AZGP1	Zinc-alpha-2-glycoprotein	ZA2G_HUMAN	1	-21.5114	0.784886	Dengue	QC	NaN	NaN	NaN	86.5177	0.0654217
Dengue / QC	_SC[Carbamidomethyl (C)]RPNDVTC[Carbamidomethyl (C)]VFDPVHTISHTVISLPTFR_	P23142	0.732985	0.732985	6.18421e-08	1.49059e-07	126	P23142	FBLN1	Fibulin-1	FBLN1_HUMAN	1	66.2074	1.66207	Dengue	QC	NaN	NaN	NaN	116.075	0.168164
Dengue / QC	_GSESGIFTNTK_	P02671	1.56834	1.56834	6.29e-08	1.51349e-07	164	P02671	FGA	Fibrinogen alpha chain	FIBA_HUMAN	1	196.563	2.96563	Dengue	QC	NaN	NaN	NaN	126.557	0.24494
Dengue / QC	_ANSFLGEK_	A0A140TA49	0.368576	0.368576	6.37358e-08	1.53228e-07	116	A0A140TA49	C4A	Complement C4-A	A0A140TA49_HUMAN	1	29.1078	1.29108	Dengue	QC	NaN	NaN	NaN	66.8249	0.107397
Dengue / QC	_GYTQQLAFR_	P01024	-0.406103	0.406103	6.39369e-08	1.53514e-07	176	P01024	C3	Complement C3	CO3_HUMAN	1	-24.5341	0.754659	Dengue	QC	NaN	NaN	NaN	115.571	0.0693959
Dengue / QC	_HLIVTPSGC[Carbamidomethyl (C)]GEQNM[Oxidation (M)]IGMTPTVIAVHYLDETEQWEK_	P01024	2.49095	2.49095	6.40916e-08	1.53793e-07	26	P01024	C3	Complement C3	CO3_HUMAN	1	462.148	5.62148	Dengue	QC	NaN	NaN	NaN	20.1396	0.220657
Dengue / QC	_LFDEINPETK_	G3V2W1;Q9UK55	0.61127	0.61127	6.41078e-08	1.53793e-07	52	G3V2W1;Q9UK55	SERPINA10	Protein Z-dependent protease inhibitor	G3V2W1_HUMAN;ZPI_HUMAN	1	52.7604	1.5276	Dengue	QC	NaN	NaN	NaN	37.7388	0.11088
Dengue / QC	_VPQVSTPTLVEVSRNLGK_	P02768	3.5014	3.5014	6.43987e-08	1.54425e-07	82	P02768	ALB	Serum albumin	ALBU_HUMAN	1	1032.47	11.3247	Dengue	QC	NaN	NaN	NaN	55.5459	0.539756
Dengue / QC	_NELIPLIYLENPR_	P20742	2.3571	2.3571	6.46773e-08	1.54991e-07	54	P20742	PZP	Pregnancy zone protein	PZP_HUMAN	1	412.341	5.12341	Dengue	QC	NaN	NaN	NaN	40.382	0.416698
Dengue / QC	_LGYVTADGETSGSITC[Carbamidomethyl (C)]GKDGWSAQPTC[Carbamidomethyl (C)]IK_	P08603	1.8455	1.8455	6.48327e-08	1.55266e-07	128	P08603	CFH	Complement factor H	CFAH_HUMAN	1	259.378	3.59378	Dengue	QC	NaN	NaN	NaN	103.609	0.307568
Dengue / QC	_HRHPDEAAFFDTASTGK_	P02671	2.4064	2.4064	6.64949e-08	1.58839e-07	166	P02671	FGA	Fibrinogen alpha chain	FIBA_HUMAN	1	430.151	5.30151	Dengue	QC	NaN	NaN	NaN	133.007	0.35565
Dengue / QC	_VHTEC[Carbamidomethyl (C)]C[Carbamidomethyl (C)]HGDLLEC[Carbamidomethyl (C)]ADDRADLAK[Methyl (KR)]YIC[Carbamidomethyl (C)]ENQDSISSK_	P02768	1.64168	1.64168	6.66078e-08	1.59041e-07	138	P02768	ALB	Serum albumin	ALBU_HUMAN	1	212.03	3.1203	Dengue	QC	NaN	NaN	NaN	78.6494	0.497372
Dengue / QC	_HPPSPTRDEC[Carbamidomethyl (C)]FAR_	Q16610	1.36376	1.36376	6.74445e-08	1.60697e-07	58	Q16610	ECM1	Extracellular matrix protein 1	ECM1_HUMAN	1	157.355	2.57355	Dengue	QC	NaN	NaN	NaN	43.9343	0.295309
Dengue / QC	_LIIFDAR[Dimethyl (KR)]_	F8WA39;H0YDX3;Q13613;Q13613-2;Q8NEC6	0.883164	0.883164	6.7705e-08	1.6118e-07	104	F8WA39;H0YDX3;Q13613;Q13613-2;Q8NEC6	MTMR1	Myotubularin-related protein 1;Myotubularin-related protein 1 (Fragment);Myotubularin-related protein 1;Isoform 1A of Myotubularin-related protein 1;MTMR1 protein	F8WA39_HUMAN;H0YDX3_HUMAN;MTMR1_HUMAN;MTMR1_HUMAN;Q8NEC6_HUMAN	1	84.4416	1.84442	Dengue	QC	NaN	NaN	NaN	74.0426	0.168952
Dengue / QC	_SGLSTGWTQLSKLLELTGPK_	P04217	1.54573	1.54573	7.11719e-08	1.6886e-07	144	P04217	A1BG	Alpha-1B-glycoprotein	A1BG_HUMAN	1	191.952	2.91952	Dengue	QC	NaN	NaN	NaN	127.418	0.228934
Dengue / QC	_KNPREDYLDVYVFGVGPLVNQVNINALASK_	B4E1Z4	0.666172	0.666172	7.20896e-08	1.7082e-07	126	B4E1Z4	NaN	cDNA FLJ55673, highly similar to Complement factor B (EC 3.4.21.47)	B4E1Z4_HUMAN	1	58.6857	1.58686	Dengue	QC	NaN	NaN	NaN	97.49	0.100501
Dengue / QC	_DASGVTFTWTPSSGKSAVQGPPER_	P01876	1.75525	1.75525	7.21535e-08	1.70837e-07	42	P01876	IGHA1	Immunoglobulin heavy constant alpha 1	IGHA1_HUMAN	1	237.585	3.37585	Dengue	QC	NaN	NaN	NaN	30.697	0.272643
Dengue / QC	_SLGNVIM[Oxidation (M)]VC[Carbamidomethyl (C)]R_	P08603	1.23844	1.23844	7.26318e-08	1.7167e-07	30	P08603	CFH	Complement factor H	CFAH_HUMAN	1	135.943	2.35943	Dengue	QC	NaN	NaN	NaN	23.1488	0.188438
Dengue / QC	_FQVDNNNR_	P01023	-0.490998	0.490998	7.31416e-08	1.72583e-07	172	P01023	A2M	Alpha-2-macroglobulin	A2MG_HUMAN	1	-28.8467	0.711533	Dengue	QC	NaN	NaN	NaN	93.5118	0.0864735
Dengue / QC	_GLEWMGR_	A0A0J9YXX1	0.45056	0.45056	7.60439e-08	1.79055e-07	166	A0A0J9YXX1	IGHV5-10-1	Immunoglobulin heavy variable 5-10-1	HV5X1_HUMAN	1	36.6571	1.36657	Dengue	QC	NaN	NaN	NaN	147.769	0.0864119
Dengue / QC	_LKMLEVPYVDR_	P00742	1.2254	1.2254	7.61287e-08	1.79179e-07	52	P00742	F10	Coagulation factor X	FA10_HUMAN	1	133.821	2.33821	Dengue	QC	NaN	NaN	NaN	36.6104	0.155157
Dengue / QC	_IEDLPTMVTLGNSFLHK_	P04275	0.535754	0.535754	7.74339e-08	1.81945e-07	120	P04275	VWF	von Willebrand factor	VWF_HUMAN	1	44.97	1.4497	Dengue	QC	NaN	NaN	NaN	113.497	0.109366
Dengue / QC	_GDKVWVYPPEK_	P02790	0.534355	0.534355	7.76973e-08	1.82488e-07	134	P02790	HPX	Hemopexin	HEMO_HUMAN	1	44.8295	1.44829	Dengue	QC	NaN	NaN	NaN	87.2556	0.0828465
Dengue / QC	_GKLLIGTVFHK_	P27169	0.635179	0.635179	7.78777e-08	1.82758e-07	128	P27169	PON1	Serum paraoxonase/arylesterase 1	PON1_HUMAN	1	55.313	1.55313	Dengue	QC	NaN	NaN	NaN	65.0064	0.0901617
Dengue / QC	_KLLETEC[Carbamidomethyl (C)]PQYIR_	P05109	1.26127	1.26127	7.90492e-08	1.8512e-07	30	P05109	S100A8	Protein S100-A8	S10A8_HUMAN	1	139.706	2.39706	Dengue	QC	NaN	NaN	NaN	21.5425	0.203391
Dengue / QC	_NPDSSTTGPWC[Carbamidomethyl (C)]YTTDPTVRR_	P00734	0.312559	0.312559	8.074e-08	1.89e-07	162	P00734	F2	Prothrombin	THRB_HUMAN	1	24.1908	1.24191	Dengue	QC	NaN	NaN	NaN	117.871	0.0514189
Dengue / QC	_NTGMETPTGVC[Carbamidomethyl (C)]AALAAAGVQPHSLDLSHNSLR_	P08571	0.365029	0.365029	8.17746e-08	1.91183e-07	128	P08571	CD14	Monocyte differentiation antigen CD14	CD14_HUMAN	1	28.7908	1.28791	Dengue	QC	NaN	NaN	NaN	79.9947	0.0910981
Dengue / QC	_AVNRADTAKEVSFDVELPK_	Q06033;Q06033-2	0.917374	0.917374	8.39132e-08	1.95611e-07	110	Q06033;Q06033-2	ITIH3	Inter-alpha-trypsin inhibitor heavy chain H3;Isoform 2 of Inter-alpha-trypsin inhibitor heavy chain H3	ITIH3_HUMAN	1	88.8674	1.88867	Dengue	QC	NaN	NaN	NaN	86.165	0.149433
Dengue / QC	_AVLTIDEK[Dimethyl (KR)]GTEAAGAMFLEAIPMSIPPEVK_	P01009	0.224751	0.224751	8.38546e-08	1.95611e-07	122	P01009	SERPINA1	Alpha-1-antitrypsin	A1AT_HUMAN	1	16.8576	1.16858	Dengue	QC	NaN	NaN	NaN	81.5234	0.148788
Dengue / QC	_C[Carbamidomethyl (C)]VPVC[Carbamidomethyl (C)]GVPREPFEEKQR_	P09871	1.36897	1.36897	8.42966e-08	1.96423e-07	116	P09871	C1S	Complement C1s subcomponent	C1S_HUMAN	1	158.286	2.58286	Dengue	QC	NaN	NaN	NaN	99.1055	0.18296
Dengue / QC	_FSC[Carbamidomethyl (C)]FQEEAPQPHYQLR_	Q16610	1.06854	1.06854	8.63044e-08	2.00684e-07	152	Q16610	ECM1	Extracellular matrix protein 1	ECM1_HUMAN	1	109.73	2.0973	Dengue	QC	NaN	NaN	NaN	137.305	0.155564
Dengue / QC	_TLSPVLESPR_	A0A087X0I0;A0A140T8Y3;A0A140T8Z8;A0A140T9C0;A0A140T9L7;A0A140TA41;A0A140TA52;P22105;P22105-3;P22105-4	0.56738	0.56738	8.87445e-08	2.05846e-07	34	A0A087X0I0;A0A140T8Y3;A0A140T8Z8;A0A140T9C0;A0A140T9L7;A0A140TA41;A0A140TA52;P22105;P22105-3;P22105-4	TNXB	Tenascin-X;Tenascin-X;Tenascin-X (Fragment);Tenascin-X;Tenascin-X (Fragment);Tenascin-X;Tenascin-X;Tenascin-X;Isoform 4 of Tenascin-X;Isoform 5 of Tenascin-X	A0A087X0I0_HUMAN;A0A140T8Y3_HUMAN;A0A140T8Z8_HUMAN;A0A140T9C0_HUMAN;A0A140T9L7_HUMAN;A0A140TA41_HUMAN;A0A140TA52_HUMAN;TENX_HUMAN;TENX_HUMAN;TENX_HUMAN	1	48.183	1.48183	Dengue	QC	NaN	NaN	NaN	23.2386	0.195248
Dengue / QC	_NLSVEDAAR_	P04040	2.11546	2.11546	8.9544e-08	2.07443e-07	22	P04040	CAT	Catalase	CATA_HUMAN	1	333.33	4.3333	Dengue	QC	NaN	NaN	NaN	15.4758	0.254221
Dengue / QC	_QQNAQGGFSSTQDTVVALHALSK_	P01023	-0.397914	0.397914	9.12344e-08	2.1101e-07	176	P01023	A2M	Alpha-2-macroglobulin	A2MG_HUMAN	1	-24.1045	0.758955	Dengue	QC	NaN	NaN	NaN	118.566	0.0679593
Dengue / QC	_EESSSGSSHAVMDISLPTGISANEEDLK_	P01031	0.845331	0.845331	9.13891e-08	2.11174e-07	62	P01031	C5	Complement C5	CO5_HUMAN	1	79.6677	1.79668	Dengue	QC	NaN	NaN	NaN	37.2492	0.135923
Dengue / QC	_EQVQSC[Carbamidomethyl (C)]GPPPELLNGNVKEK_	P08603	0.642396	0.642396	9.17861e-08	2.11762e-07	124	P08603	CFH	Complement factor H	CFAH_HUMAN	1	56.0919	1.56092	Dengue	QC	NaN	NaN	NaN	112.52	0.102702
Dengue / QC	_WKC[Carbamidomethyl (C)]DPVDQC[Carbamidomethyl (C)]QDSETGTFYQIGDSWEK_	P02751;P02751-15;P02751-3;P02751-7	0.626075	0.626075	9.44027e-08	2.17173e-07	166	P02751;P02751-15;P02751-3;P02751-7	FN1	Fibronectin;Isoform 15 of Fibronectin;Isoform 3 of Fibronectin;Isoform 7 of Fibronectin	FINC_HUMAN	1	54.3361	1.54336	Dengue	QC	NaN	NaN	NaN	143.336	0.0978117
Dengue / QC	_VPMMYGAGK_	G3V2W1;Q9UK55	1.11323	1.11323	9.44739e-08	2.17247e-07	20	G3V2W1;Q9UK55	SERPINA10	Protein Z-dependent protease inhibitor	G3V2W1_HUMAN;ZPI_HUMAN	1	116.329	2.16329	Dengue	QC	NaN	NaN	NaN	9.03419	0.172126
Dengue / QC	_KGGVASGFKHVVPNEVVVQR_	P06396	0.877945	0.877945	9.71054e-08	2.2275e-07	80	P06396	GSN	Gelsolin	GELS_HUMAN	1	83.7756	1.83776	Dengue	QC	NaN	NaN	NaN	23.8391	0.137492
Dengue / QC	_KEEYGHNEVVEYDC[Carbamidomethyl (C)]NPNFIINGPK_	Q9BXR6	0.930903	0.930903	9.97981e-08	2.28515e-07	56	Q9BXR6	CFHR5	Complement factor H-related protein 5	FHR5_HUMAN	1	90.6468	1.90647	Dengue	QC	NaN	NaN	NaN	44.4037	0.171202
Dengue / QC	_ALNSIIDVYHK_	P05109	2.51608	2.51608	1.00532e-07	2.29951e-07	24	P05109	S100A8	Protein S100-A8	S10A8_HUMAN	1	472.026	5.72026	Dengue	QC	NaN	NaN	NaN	12.2647	0.197352
Dengue / QC	_QIKKQTALVELVK_	P02768	1.68308	1.68308	1.04276e-07	2.3832e-07	166	P02768	ALB	Serum albumin	ALBU_HUMAN	1	221.112	3.21112	Dengue	QC	NaN	NaN	NaN	139.768	0.257084
Dengue / QC	_YWC[Carbamidomethyl (C)]NDGKTPGAVNAC[Carbamidomethyl (C)]HLSC[Carbamidomethyl (C)]SALLQDNIADAVAC[Carbamidomethyl (C)]AK_	P61626	0.735364	0.735364	1.05505e-07	2.40919e-07	32	P61626	LYZ	Lysozyme C	LYSC_HUMAN	1	66.4818	1.66482	Dengue	QC	NaN	NaN	NaN	25.8813	0.168488
Dengue / QC	_AGFSWIEVTFK_	Q14624	0.636025	0.636025	1.06604e-07	2.43147e-07	46	Q14624	ITIH4	Inter-alpha-trypsin inhibitor heavy chain H4	ITIH4_HUMAN	1	55.4041	1.55404	Dengue	QC	NaN	NaN	NaN	39.7773	0.0997508
Dengue / QC	_VDLSFSPSQSLPASHAHLR_	P01023	-0.405197	0.405197	1.08207e-07	2.46201e-07	176	P01023	A2M	Alpha-2-macroglobulin	A2MG_HUMAN	1	-24.4867	0.755133	Dengue	QC	NaN	NaN	NaN	107.515	0.0634347
Dengue / QC	_MVQEQC[Carbamidomethyl (C)]C[Carbamidomethyl (C)]HSQLEELHC[Carbamidomethyl (C)]ATGISLANEQDR_	P23142	0.947534	0.947534	1.0844e-07	2.4663e-07	134	P23142	FBLN1	Fibulin-1	FBLN1_HUMAN	1	92.8573	1.92857	Dengue	QC	NaN	NaN	NaN	107.001	0.158619
Dengue / QC	_MGVSWIR[Methyl (KR)]_	A0A0B4J1V2	1.21894	1.21894	1.08558e-07	2.46699e-07	48	A0A0B4J1V2	IGHV2-26	Immunoglobulin heavy variable 2-26	HV226_HUMAN	1	132.776	2.32776	Dengue	QC	NaN	NaN	NaN	37.1147	0.195436
Dengue / QC	_SC[Carbamidomethyl (C)]DIPVFM[Oxidation (M)]NAR_	P08603	1.08632	1.08632	1.08841e-07	2.4724e-07	130	P08603	CFH	Complement factor H	CFAH_HUMAN	1	112.332	2.12332	Dengue	QC	NaN	NaN	NaN	123.187	0.194987
Dengue / QC	_HLIVTPSGC[Carbamidomethyl (C)]GEQNMIGMTPTVIAVHYLDETEQWEKFGLEKR_	P01024	0.624225	0.624225	1.09583e-07	2.48726e-07	88	P01024	C3	Complement C3	CO3_HUMAN	1	54.1383	1.54138	Dengue	QC	NaN	NaN	NaN	43.6695	0.10141
Dengue / QC	_ITEVWGIPSPIDTVFTR_	A0A0U1RR20;Q92954;Q92954-3;Q92954-6	1.20693	1.20693	1.12184e-07	2.54218e-07	70	A0A0U1RR20;Q92954;Q92954-3;Q92954-6	PRG4	Proteoglycan 4;Proteoglycan 4;Isoform C of Proteoglycan 4;Isoform F of Proteoglycan 4	A0A0U1RR20_HUMAN;PRG4_HUMAN;PRG4_HUMAN;PRG4_HUMAN	1	130.845	2.30845	Dengue	QC	NaN	NaN	NaN	35.1428	0.182131
Dengue / QC	_C[Carbamidomethyl (C)]TSYPDGSWK_	P07996	0.5535	0.5535	1.12317e-07	2.54416e-07	82	P07996	THBS1	Thrombospondin-1	TSP1_HUMAN	1	46.7642	1.46764	Dengue	QC	NaN	NaN	NaN	28.543	0.106673
Dengue / QC	_PAGLPEKY_	P0DJI8	1.58852	1.58852	1.14771e-07	2.59451e-07	42	P0DJI8	SAA1	Serum amyloid A-1 protein	SAA1_HUMAN	1	200.74	3.0074	Dengue	QC	NaN	NaN	NaN	24.7149	0.21878
Dengue / QC	_QTSPVSAMLVLVK_	Q12805;Q12805-2;Q12805-4	2.11162	2.11162	1.15221e-07	2.60256e-07	30	Q12805;Q12805-2;Q12805-4	EFEMP1	EGF-containing fibulin-like extracellular matrix protein 1;Isoform 2 of EGF-containing fibulin-like extracellular matrix protein 1;Isoform 4 of EGF-containing fibulin-like extracellular matrix protein 1	FBLN3_HUMAN	1	332.175	4.32175	Dengue	QC	NaN	NaN	NaN	22.7311	0.280555
Dengue / QC	_RPDFC[Carbamidomethyl (C)]PFQC[Carbamidomethyl (C)]PAHSHYELC[Carbamidomethyl (C)]GDSC[Carbamidomethyl (C)]PGSC[Carbamidomethyl (C)]PSLSAPEGC[Carbamidomethyl (C)]ESAC[Carbamidomethyl (C)]R_	Q9Y6R7	1.89826	1.89826	1.15676e-07	2.6118e-07	38	Q9Y6R7	FCGBP	IgGFc-binding protein	FCGBP_HUMAN	1	272.763	3.72763	Dengue	QC	NaN	NaN	NaN	25.6345	0.289153
Dengue / QC	_RYTIAALLSPYSYSTTAVVTNPK[Methyl (KR)]E_	P02766	0.412813	0.412813	1.17325e-07	2.6437e-07	32	P02766	TTR	Transthyretin	TTHY_HUMAN	1	33.1279	1.33128	Dengue	QC	NaN	NaN	NaN	12.5734	0.854962
Dengue / QC	_AFWLDVSHNR_	P35858;P35858-2	1.0311	1.0311	1.24002e-07	2.78297e-07	32	P35858;P35858-2	IGFALS	Insulin-like growth factor-binding protein complex acid labile subunit;Isoform 2 of Insulin-like growth factor-binding protein complex acid labile subunit	ALS_HUMAN	1	104.358	2.04358	Dengue	QC	NaN	NaN	NaN	13.3432	0.117429
Dengue / QC	_AAC[Carbamidomethyl (C)]LLPKLDELR_	P02768	1.93883	1.93883	1.26358e-07	2.83245e-07	28	P02768	ALB	Serum albumin	ALBU_HUMAN	1	283.396	3.83396	Dengue	QC	NaN	NaN	NaN	18.8504	0.232602
Dengue / QC	_M[Oxidation (M)]FLSFPTTK_	P69905	0.667276	0.667276	1.26987e-07	2.84541e-07	164	P69905	HBA1	Hemoglobin subunit alpha	HBA_HUMAN	1	58.8071	1.58807	Dengue	QC	NaN	NaN	NaN	157.031	0.0863935
Dengue / QC	_DSPIQC[Carbamidomethyl (C)]IQAIAENR_	E7ER44;P02788	1.74045	1.74045	1.28685e-07	2.88114e-07	36	E7ER44;P02788	LTF	Lactotransferrin	E7ER44_HUMAN;TRFL_HUMAN	1	234.14	3.3414	Dengue	QC	NaN	NaN	NaN	24.3191	0.258223
Dengue / QC	_SFVHLEPMSHELPC[Carbamidomethyl (C)]GHTQTVQAHYILNGGTLLGLK_	P01023	0.76571	0.76571	1.28883e-07	2.88443e-07	140	P01023	A2M	Alpha-2-macroglobulin	A2MG_HUMAN	1	70.0207	1.70021	Dengue	QC	NaN	NaN	NaN	135.662	0.117941
Dengue / QC	_ELPQSIVYK_	Q12805;Q12805-2;Q12805-4	1.18802	1.18802	1.29146e-07	2.88915e-07	62	Q12805;Q12805-2;Q12805-4	EFEMP1	EGF-containing fibulin-like extracellular matrix protein 1;Isoform 2 of EGF-containing fibulin-like extracellular matrix protein 1;Isoform 4 of EGF-containing fibulin-like extracellular matrix protein 1	FBLN3_HUMAN	1	127.84	2.2784	Dengue	QC	NaN	NaN	NaN	56.6073	0.22291
Dengue / QC	_LVDEDMNSFK_	Q06033;Q06033-2	-0.442069	0.442069	1.29982e-07	2.90669e-07	170	Q06033;Q06033-2	ITIH3	Inter-alpha-trypsin inhibitor heavy chain H3;Isoform 2 of Inter-alpha-trypsin inhibitor heavy chain H3	ITIH3_HUMAN	1	-26.3922	0.736078	Dengue	QC	NaN	NaN	NaN	67.5522	0.0732245
Dengue / QC	_LMNIFLKDSITTWEILAVSMSDKK_	P01024	0.997445	0.997445	1.30372e-07	2.91425e-07	144	P01024	C3	Complement C3	CO3_HUMAN	1	99.6462	1.99646	Dengue	QC	NaN	NaN	NaN	85.3237	0.137204
Dengue / QC	_TFPGFFSPMLGEFVSETESR_	P02671	1.99939	1.99939	1.32969e-07	2.96639e-07	176	P02671	FGA	Fibrinogen alpha chain	FIBA_HUMAN	1	299.831	3.99831	Dengue	QC	NaN	NaN	NaN	138.951	0.362732
Dengue / QC	_EAC[Carbamidomethyl (C)]NAWLQKR_	Q9NZP8	1.84302	1.84302	1.3445e-07	2.99466e-07	42	Q9NZP8	C1RL	Complement C1r subcomponent-like protein	C1RL_HUMAN	1	258.76	3.5876	Dengue	QC	NaN	NaN	NaN	26.9457	0.363162
Dengue / QC	_KC[Carbamidomethyl (C)]C[Carbamidomethyl (C)]YDGAC[Carbamidomethyl (C)]VNNDETC[Carbamidomethyl (C)]EQR_	P01031	0.644501	0.644501	1.3496e-07	3.00482e-07	56	P01031	C5	Complement C5	CO5_HUMAN	1	56.3199	1.5632	Dengue	QC	NaN	NaN	NaN	38.2555	0.114473
Dengue / QC	_KGETFSC[Carbamidomethyl (C)]M[Oxidation (M)]VGHEALPLAFTQK_	A0A286YEY5;P01877	0.816364	0.816364	1.38155e-07	3.06987e-07	40	A0A286YEY5;P01877	IGHA2	Immunoglobulin heavy constant alpha 2 (Fragment);Immunoglobulin heavy constant alpha 2	A0A286YEY5_HUMAN;IGHA2_HUMAN	1	76.0962	1.76096	Dengue	QC	NaN	NaN	NaN	17.2203	0.180855
Dengue / QC	_MADEAGSEADHEGTHSTK_	P02671	1.43056	1.43056	1.40106e-07	3.10953e-07	166	P02671	FGA	Fibrinogen alpha chain	FIBA_HUMAN	1	169.551	2.69551	Dengue	QC	NaN	NaN	NaN	148.18	0.258273
Dengue / QC	_IYISGMAPRPSLAKK_	P04004	0.710371	0.710371	1.40806e-07	3.12258e-07	164	P04004	VTN	Vitronectin	VTNC_HUMAN	1	63.6225	1.63622	Dengue	QC	NaN	NaN	NaN	127.778	0.0978275
Dengue / QC	_ILDELLQTC[Carbamidomethyl (C)]VDPEDC[Carbamidomethyl (C)]PVC[Carbamidomethyl (C)]EVAGRR_	P04275	0.76136	0.76136	1.4093e-07	3.1241e-07	80	P04275	VWF	von Willebrand factor	VWF_HUMAN	1	69.5088	1.69509	Dengue	QC	NaN	NaN	NaN	59.1841	0.144856
Dengue / QC	_LVTDLTKVHTEC[Carbamidomethyl (C)]C[Carbamidomethyl (C)]HGDLLEC[Carbamidomethyl (C)]ADDR_	P02768	1.13468	1.13468	1.41412e-07	3.13353e-07	140	P02768	ALB	Serum albumin	ALBU_HUMAN	1	119.57	2.1957	Dengue	QC	NaN	NaN	NaN	117.094	0.192408
Dengue / QC	_NPNLPPETVDSLKNILTSNNIDVKK_	P05090	0.445523	0.445523	1.42494e-07	3.15626e-07	108	P05090	APOD	Apolipoprotein D	APOD_HUMAN	1	36.1808	1.36181	Dengue	QC	NaN	NaN	NaN	82.6074	0.0814932
Dengue / QC	_HPDEAAFFDTASTGK_	P02671	1.78229	1.78229	1.46182e-07	3.2303e-07	146	P02671	FGA	Fibrinogen alpha chain	FIBA_HUMAN	1	243.972	3.43972	Dengue	QC	NaN	NaN	NaN	113.737	0.295968
Dengue / QC	_EWVAIESDSVQPVPR_	Q96KN2	0.849665	0.849665	1.46678e-07	3.23742e-07	46	Q96KN2	CNDP1	Beta-Ala-His dipeptidase	CNDP1_HUMAN	1	80.2083	1.80208	Dengue	QC	NaN	NaN	NaN	35.8985	0.142764
Dengue / QC	_IALGGLLFPASNLR_	I3L145;P04278	1.27983	1.27983	1.46882e-07	3.24065e-07	56	I3L145;P04278	SHBG	Sex hormone-binding globulin	I3L145_HUMAN;SHBG_HUMAN	1	142.81	2.4281	Dengue	QC	NaN	NaN	NaN	34.5863	0.265517
Dengue / QC	_GETFSC[Carbamidomethyl (C)]MVGHEALPLAFTQK_	A0A286YEY5;P01877	-0.209428	0.209428	1.47923e-07	3.25976e-07	164	A0A286YEY5;P01877	IGHA2	Immunoglobulin heavy constant alpha 2 (Fragment);Immunoglobulin heavy constant alpha 2	A0A286YEY5_HUMAN;IGHA2_HUMAN	1	-13.512	0.86488	Dengue	QC	NaN	NaN	NaN	74.0871	0.315244
Dengue / QC	_KQLGAGSIEEC[Carbamidomethyl (C)]AAKC[Carbamidomethyl (C)]EEDEEFTC[Carbamidomethyl (C)]R_	P00747	0.547097	0.547097	1.49026e-07	3.28278e-07	154	P00747	PLG	Plasminogen	PLMN_HUMAN	1	46.1142	1.46114	Dengue	QC	NaN	NaN	NaN	146.973	0.107842
Dengue / QC	_SVQWC[Carbamidomethyl (C)]AVSQPEATK_	E7ER44;P02788	1.41823	1.41823	1.51656e-07	3.33418e-07	28	E7ER44;P02788	LTF	Lactotransferrin	E7ER44_HUMAN;TRFL_HUMAN	1	167.258	2.67258	Dengue	QC	NaN	NaN	NaN	19.5021	0.232418
Dengue / QC	_FLFDTKEEILMHLWR_	Q96KN2	1.60768	1.60768	1.51822e-07	3.33651e-07	30	Q96KN2	CNDP1	Beta-Ala-His dipeptidase	CNDP1_HUMAN	1	204.761	3.04761	Dengue	QC	NaN	NaN	NaN	23.8121	0.203288
Dengue / QC	_AEAEEDGDLQC[Carbamidomethyl (C)]LC[Carbamidomethyl (C)]VK_	P10720	0.867259	0.867259	1.53649e-07	3.37138e-07	46	P10720	PF4V1	Platelet factor 4 variant	PF4V_HUMAN	1	82.4194	1.82419	Dengue	QC	NaN	NaN	NaN	26.1818	0.133263
Dengue / QC	_TMSGLEC[Carbamidomethyl (C)]QAWDSQSPHAHGYIPSK_	P00747	0.523822	0.523822	1.54493e-07	3.38857e-07	48	P00747	PLG	Plasminogen	PLMN_HUMAN	1	43.7759	1.43776	Dengue	QC	NaN	NaN	NaN	26.5945	0.0898959
Dengue / QC	_YAATSQVLLPSK_	P01871	-0.468929	0.468929	1.55304e-07	3.40502e-07	168	P01871	IGHM	Immunoglobulin heavy constant mu	IGHM_HUMAN	1	-27.7499	0.722501	Dengue	QC	NaN	NaN	NaN	145.313	0.0834705
Dengue / QC	_TLLVEAEGIEQEK_	P20742	2.61758	2.61758	1.56115e-07	3.42146e-07	88	P20742	PZP	Pregnancy zone protein	PZP_HUMAN	1	513.718	6.13718	Dengue	QC	NaN	NaN	NaN	59.8333	0.456297
Dengue / QC	_YYWGGQYTWDMAK_	P02675	3.00575	3.00575	1.58962e-07	3.47436e-07	102	P02675	FGB	Fibrinogen beta chain	FIBB_HUMAN	1	703.197	8.03197	Dengue	QC	NaN	NaN	NaN	73.1491	0.422368
Dengue / QC	_QGYDLSPLTPLSELSVQC[Carbamidomethyl (C)]NR_	P05160	0.707888	0.707888	1.59673e-07	3.48717e-07	98	P05160	F13B	Coagulation factor XIII B chain	F13B_HUMAN	1	63.3412	1.63341	Dengue	QC	NaN	NaN	NaN	33.9468	0.121377
Dengue / QC	_YAASSYLSLTPEQWKSHR_	P0DOY2	0.567654	0.567654	1.61486e-07	3.52402e-07	156	P0DOY2	IGLC2	Immunoglobulin lambda constant 2	IGLC2_HUMAN	1	48.2111	1.48211	Dengue	QC	NaN	NaN	NaN	141.138	0.107508
Dengue / QC	_APGWDPLC[Carbamidomethyl (C)]WDEC[Carbamidomethyl (C)]R_	Q9Y6R7	1.64085	1.64085	1.6343e-07	3.5609e-07	54	Q9Y6R7	FCGBP	IgGFc-binding protein	FCGBP_HUMAN	1	211.849	3.11849	Dengue	QC	NaN	NaN	NaN	42.4041	0.251995
Dengue / QC	_LLFKGSEMVVAGK_	Q14624	1.05398	1.05398	1.64386e-07	3.58033e-07	62	Q14624	ITIH4	Inter-alpha-trypsin inhibitor heavy chain H4	ITIH4_HUMAN	1	107.625	2.07625	Dengue	QC	NaN	NaN	NaN	49.263	0.176444
Dengue / QC	_EVVTSEDGSDC[Carbamidomethyl (C)]PEAMDLGTLSGIGTLDGFR_	P02671	1.38889	1.38889	1.6647e-07	3.61868e-07	148	P02671	FGA	Fibrinogen alpha chain	FIBA_HUMAN	1	161.877	2.61877	Dengue	QC	NaN	NaN	NaN	133.182	0.22216
Dengue / QC	_LVGGPMDASVEEEGVR_	P01034	1.75517	1.75517	1.67237e-07	3.63255e-07	22	P01034	CST3	Cystatin-C	CYTC_HUMAN	1	237.566	3.37566	Dengue	QC	NaN	NaN	NaN	14.5912	0.269213
Dengue / QC	_WDRELISER_	P02790	0.518713	0.518713	1.71292e-07	3.71296e-07	124	P02790	HPX	Hemopexin	HEMO_HUMAN	1	43.2676	1.43268	Dengue	QC	NaN	NaN	NaN	55.0981	0.0945595
Dengue / QC	_LLIYYDDLLPSGVSDRFSGSK_	A0A0B4J1U3	1.15146	1.15146	1.72061e-07	3.72708e-07	72	A0A0B4J1U3	IGLV1-36	Immunoglobulin lambda variable 1-36	LV136_HUMAN	1	122.139	2.22139	Dengue	QC	NaN	NaN	NaN	43.3737	0.20744
Dengue / QC	_SLHTLFGDK_	P02768	-0.394362	0.394362	1.74919e-07	3.78035e-07	176	P02768	ALB	Serum albumin	ALBU_HUMAN	1	-23.9174	0.760826	Dengue	QC	NaN	NaN	NaN	96.2476	0.0704504
Dengue / QC	_IALGGLLFPASNLRLPLVPALDGC[Carbamidomethyl (C)]LR_	I3L145;P04278	1.11975	1.11975	1.78932e-07	3.85965e-07	36	I3L145;P04278	SHBG	Sex hormone-binding globulin	I3L145_HUMAN;SHBG_HUMAN	1	117.31	2.1731	Dengue	QC	NaN	NaN	NaN	29.5522	0.196511
Dengue / QC	_DQTIRFDHVITNM[Oxidation (M)]NNNYEPR_	D6R934;P02746	0.727415	0.727415	1.80905e-07	3.8992e-07	94	D6R934;P02746	C1QB	Complement C1q subcomponent subunit B	D6R934_HUMAN;C1QB_HUMAN	1	65.567	1.65567	Dengue	QC	NaN	NaN	NaN	45.067	0.099756
Dengue / QC	_VSSVEEC[Carbamidomethyl (C)]QKR_	H0YAC1;P03952	0.973375	0.973375	1.99187e-07	4.27352e-07	112	H0YAC1;P03952	KLKB1	Plasma kallikrein (Fragment);Plasma kallikrein	H0YAC1_HUMAN;KLKB1_HUMAN	1	96.3429	1.96343	Dengue	QC	NaN	NaN	NaN	80.996	0.16273
Dengue / QC	_AQTTVTC[Carbamidomethyl (C)]TEK_	Q02985;Q02985-2	1.14385	1.14385	2.00789e-07	4.3046e-07	66	Q02985;Q02985-2	CFHR3	Complement factor H-related protein 3;Isoform 2 of Complement factor H-related protein 3	FHR3_HUMAN	1	120.971	2.20971	Dengue	QC	NaN	NaN	NaN	34.9381	0.155165
Dengue / QC	_GRPKLLQLPLGFLYVHHTYVPAPPC[Carbamidomethyl (C)]TDFTR_	Q96PD5	1.38192	1.38192	2.032e-07	4.35462e-07	76	Q96PD5	PGLYRP2	N-acetylmuramoyl-L-alanine amidase	PGRP2_HUMAN	1	160.615	2.60615	Dengue	QC	NaN	NaN	NaN	63.0116	0.204979
Dengue / QC	_GPTQDFR_	P20742	3.67065	3.67065	2.03843e-07	4.36673e-07	26	P20742	PZP	Pregnancy zone protein	PZP_HUMAN	1	1173.43	12.7343	Dengue	QC	NaN	NaN	NaN	18.3643	0.514581
Dengue / QC	_VNVDAVGGEALGR_	P02042	0.307384	0.307384	2.06457e-07	4.41598e-07	152	P02042	HBD	Hemoglobin subunit delta	HBD_HUMAN	1	23.7462	1.23746	Dengue	QC	NaN	NaN	NaN	136.907	0.0558888
Dengue / QC	_LLNLDGTC[Carbamidomethyl (C)]ADSYSFVFSR_	P02753;Q5VY30	0.53151	0.53151	2.06852e-07	4.42274e-07	162	P02753;Q5VY30	RBP4	Retinol-binding protein 4;Retinol binding protein 4, plasma, isoform CRA_b	RET4_HUMAN;Q5VY30_HUMAN	1	44.5441	1.44544	Dengue	QC	NaN	NaN	NaN	104.002	0.107091
Dengue / QC	_SR[Methyl (KR)]VTMSVDTSK_	A0A0C4DH34	0.97575	0.97575	2.12658e-07	4.53994e-07	12	A0A0C4DH34	IGHV4-28	Immunoglobulin heavy variable 4-28	HV428_HUMAN	1	96.6664	1.96666	Dengue	QC	NaN	NaN	NaN	5.68351	0.263985
Dengue / QC	_LEAGINQLSFPLSSEPIQGSYR_	P20742	2.29065	2.29065	2.13292e-07	4.55002e-07	64	P20742	PZP	Pregnancy zone protein	PZP_HUMAN	1	389.275	4.89275	Dengue	QC	NaN	NaN	NaN	43.8019	0.35146
Dengue / QC	_VGSQYRLEDSVTYHC[Carbamidomethyl (C)]SR_	B4E1Z4	1.57727	1.57727	2.13769e-07	4.55845e-07	122	B4E1Z4	NaN	cDNA FLJ55673, highly similar to Complement factor B (EC 3.4.21.47)	B4E1Z4_HUMAN	1	198.405	2.98405	Dengue	QC	NaN	NaN	NaN	104.444	0.246708
Dengue / QC	_ALWEKPFISSR_	P29622	0.335783	0.335783	2.14822e-07	4.57883e-07	78	P29622	SERPINA4	Kallistatin	KAIN_HUMAN	1	26.2062	1.26206	Dengue	QC	NaN	NaN	NaN	43.8967	0.0831563
Dengue / QC	_ATWSGAVLAGR_	P04217	-0.456087	0.456087	2.21014e-07	4.7022e-07	160	P04217	A1BG	Alpha-1B-glycoprotein	A1BG_HUMAN	1	-27.1039	0.728961	Dengue	QC	NaN	NaN	NaN	51.9634	0.0783588
Dengue / QC	_EGFGHLSPTGTTEFWLGNEK_	P02679;P02679-2	1.88295	1.88295	2.26092e-07	4.80113e-07	120	P02679;P02679-2	FGG	Fibrinogen gamma chain;Isoform Gamma-A of Fibrinogen gamma chain	FIBG_HUMAN	1	268.828	3.68828	Dengue	QC	NaN	NaN	NaN	105.767	0.293591
Dengue / QC	_GFPSVLRGGKYAATSQVLLPSK_	P01871	0.673646	0.673646	2.2793e-07	4.83468e-07	74	P01871	IGHM	Immunoglobulin heavy constant mu	IGHM_HUMAN	1	59.5099	1.5951	Dengue	QC	NaN	NaN	NaN	68.017	0.112458
Dengue / QC	_SLNPNRVTFK_	P01008	0.975124	0.975124	2.34679e-07	4.96468e-07	170	P01008	SERPINC1	Antithrombin-III	ANT3_HUMAN	1	96.581	1.96581	Dengue	QC	NaN	NaN	NaN	153.733	0.16256
Dengue / QC	_SHC[Carbamidomethyl (C)]IAEVENDEM[Oxidation (M)]PADLPSLAADFVESKDVC[Carbamidomethyl (C)]KNYAEAK_	P02768	1.59333	1.59333	2.35996e-07	4.99064e-07	130	P02768	ALB	Serum albumin	ALBU_HUMAN	1	201.745	3.01745	Dengue	QC	NaN	NaN	NaN	108.36	0.255381
Dengue / QC	_LPVSLSEGR_	Q9Y6R7	2.56543	2.56543	2.37215e-07	5.01264e-07	18	Q9Y6R7	FCGBP	IgGFc-binding protein	FCGBP_HUMAN	1	491.932	5.91932	Dengue	QC	NaN	NaN	NaN	7.18636	0.133413
Dengue / QC	_AFSDRNTLIIYLDKVSHSEDDC[Carbamidomethyl (C)]LAFK_	P01024	1.19179	1.19179	2.38533e-07	5.0386e-07	54	P01024	C3	Complement C3	CO3_HUMAN	1	128.435	2.28435	Dengue	QC	NaN	NaN	NaN	22.7073	0.201305
Dengue / QC	_TLDHDRC[Carbamidomethyl (C)]DQHTDC[Carbamidomethyl (C)]YSC[Carbamidomethyl (C)]TANTNDC[Carbamidomethyl (C)]HWC[Carbamidomethyl (C)]NDHC[Carbamidomethyl (C)]VPR_	O75882;O75882-2;O75882-3	0.931284	0.931284	2.4443e-07	5.15151e-07	32	O75882;O75882-2;O75882-3	ATRN	Attractin;Isoform 2 of Attractin;Isoform 3 of Attractin	ATRN_HUMAN	1	90.6972	1.90697	Dengue	QC	NaN	NaN	NaN	16.1192	0.11925
Dengue / QC	_AYYHLLEQVAPKGDEEGVPAVVIDMSGLR_	P13796	0.559404	0.559404	2.50296e-07	5.26722e-07	90	P13796	LCP1	Plastin-2	PLSL_HUMAN	1	47.366	1.47366	Dengue	QC	NaN	NaN	NaN	81.1321	0.133001
Dengue / QC	_TLSLPELEQQQEQQQEQQQEQVQMLAPLES_	P06727	0.776988	0.776988	2.50392e-07	5.26725e-07	110	P06727	APOA4	Apolipoprotein A-IV	APOA4_HUMAN	1	71.355	1.71355	Dengue	QC	NaN	NaN	NaN	104.649	0.114093
Dengue / QC	_WSSPPVC[Carbamidomethyl (C)]LEPC[Carbamidomethyl (C)]TVNVDYMNR_	P05160	0.630059	0.630059	2.5107e-07	5.27953e-07	76	P05160	F13B	Coagulation factor XIII B chain	F13B_HUMAN	1	54.7628	1.54763	Dengue	QC	NaN	NaN	NaN	34.8817	0.111522
Dengue / QC	_STGGAPTFNVTVTK_	P07737	0.584204	0.584204	2.51257e-07	5.28148e-07	82	P07737	PFN1	Profilin-1	PROF1_HUMAN	1	49.9212	1.49921	Dengue	QC	NaN	NaN	NaN	72.0576	0.0987823
Dengue / QC	_WTPPRAQITGYRLTVGLTR_	P02751;P02751-15;P02751-3;P02751-7	1.85583	1.85583	2.54888e-07	5.34779e-07	44	P02751;P02751-15;P02751-3;P02751-7	FN1	Fibronectin;Isoform 15 of Fibronectin;Isoform 3 of Fibronectin;Isoform 7 of Fibronectin	FINC_HUMAN	1	261.959	3.61959	Dengue	QC	NaN	NaN	NaN	38.8259	0.260099
Dengue / QC	_WVMVPMMSLHHLTIPYFR_	P01011	0.560058	0.560058	2.58661e-07	5.42086e-07	142	P01011	SERPINA3	Alpha-1-antichymotrypsin	AACT_HUMAN	1	47.4329	1.47433	Dengue	QC	NaN	NaN	NaN	93.2091	0.104636
Dengue / QC	_EC[Carbamidomethyl (C)]EEIIR_	P02675	2.01923	2.01923	2.63826e-07	5.52084e-07	94	P02675	FGB	Fibrinogen beta chain	FIBB_HUMAN	1	305.367	4.05367	Dengue	QC	NaN	NaN	NaN	87.2887	0.329957
Dengue / QC	_NIETIINTFHQYSVK_	P06702	2.73386	2.73386	2.64155e-07	5.52566e-07	54	P06702	S100A9	Protein S100-A9	S10A9_HUMAN	1	565.231	6.65231	Dengue	QC	NaN	NaN	NaN	36.2835	0.280562
Dengue / QC	_GGEGTGYFVDFSVR_	P04196	0.399183	0.399183	2.64349e-07	5.52766e-07	176	P04196	HRG	Histidine-rich glycoprotein	HRG_HUMAN	1	31.8761	1.31876	Dengue	QC	NaN	NaN	NaN	134.299	0.0740732
Dengue / QC	_AFQPFFVELTMPYSVIRGEAFTLKATVLNYLPK_	P01023	1.2748	1.2748	2.65303e-07	5.54554e-07	50	P01023	A2M	Alpha-2-macroglobulin	A2MG_HUMAN	1	141.965	2.41965	Dengue	QC	NaN	NaN	NaN	39.9376	0.163758
Dengue / QC	_SLGNVIM[Oxidation (M)]VC[Carbamidomethyl (C)]R[Methyl (KR)]_	P08603	1.55855	1.55855	2.67676e-07	5.59096e-07	18	P08603	CFH	Complement factor H	CFAH_HUMAN	1	194.557	2.94557	Dengue	QC	NaN	NaN	NaN	11.6599	0.169276
Dengue / QC	_FGNADGAAC[Carbamidomethyl (C)]HFPFIFEGR_	P14780	2.05584	2.05584	2.68762e-07	5.61156e-07	22	P14780	MMP9	Matrix metalloproteinase-9	MMP9_HUMAN	1	315.786	4.15786	Dengue	QC	NaN	NaN	NaN	14.231	0.247561
Dengue / QC	_LMIYDVSK_	P01706	-0.761787	0.761787	2.75697e-07	5.74566e-07	174	P01706	IGLV2-11	Immunoglobulin lambda variable 2-11	LV211_HUMAN	1	-41.0235	0.589765	Dengue	QC	NaN	NaN	NaN	111.679	0.137547
Dengue / QC	_K[Methyl (KR)]GDTFSC[Carbamidomethyl (C)]MVGHEALPLAFTQK_	A0A0G2JMB2	0.888371	0.888371	2.77771e-07	5.78028e-07	106	A0A0G2JMB2	IGHA2	Immunoglobulin heavy constant alpha 2 (Fragment)	A0A0G2JMB2_HUMAN	1	85.1084	1.85108	Dengue	QC	NaN	NaN	NaN	70.4026	0.167861
Dengue / QC	_HLEVDVWVIEPQGLR_	P19823	0.710507	0.710507	2.84909e-07	5.92222e-07	176	P19823	ITIH2	Inter-alpha-trypsin inhibitor heavy chain H2	ITIH2_HUMAN	1	63.638	1.63638	Dengue	QC	NaN	NaN	NaN	80.2974	0.135843
Dengue / QC	_ASC[Carbamidomethyl (C)]K[Methyl (KR)]VPVKK_	P02749	2.89683	2.89683	2.8599e-07	5.94248e-07	48	P02749	APOH	Beta-2-glycoprotein 1	APOH_HUMAN	1	644.79	7.4479	Dengue	QC	NaN	NaN	NaN	38.8125	0.505224
Dengue / QC	_LSC[Carbamidomethyl (C)]AASGFTFDDYGMSWVR_	A0A0C4DH32	0.944166	0.944166	2.86952e-07	5.95584e-07	38	A0A0C4DH32	IGHV3-20	Immunoglobulin heavy variable 3-20	HV320_HUMAN	1	92.4076	1.92408	Dengue	QC	NaN	NaN	NaN	26.9246	0.182615
Dengue / QC	_LNLVATPLFLKPGIPYPIK_	P01031	0.979328	0.979328	2.98403e-07	6.16839e-07	40	P01031	C5	Complement C5	CO5_HUMAN	1	97.1547	1.97155	Dengue	QC	NaN	NaN	NaN	18.8923	0.138584
Dengue / QC	_LAEYHAK_	P02647	0.873832	0.873832	2.99605e-07	6.18868e-07	134	P02647	APOA1	Apolipoprotein A-I	APOA1_HUMAN	1	83.2524	1.83252	Dengue	QC	NaN	NaN	NaN	78.0158	0.155593
Dengue / QC	_SVGSQWASPENPC[Carbamidomethyl (C)]LINEC[Carbamidomethyl (C)]VR_	P04275	0.736734	0.736734	3.04269e-07	6.27576e-07	98	P04275	VWF	von Willebrand factor	VWF_HUMAN	1	66.6399	1.6664	Dengue	QC	NaN	NaN	NaN	88.5752	0.130622
Dengue / QC	_LLIYDASNLETGVPSR_	P01593;P01594	-0.771665	0.771665	3.07292e-07	6.33345e-07	176	P01593;P01594	IGKV1D-33;IGKV1-33	Immunoglobulin kappa variable 1D-33;Immunoglobulin kappa variable 1-33	KVD33_HUMAN;KV133_HUMAN	1	-41.4259	0.585741	Dengue	QC	NaN	NaN	NaN	56.3685	0.116894
Dengue / QC	_TWC[Carbamidomethyl (C)]EGTR_	Q04756	0.683305	0.683305	3.09677e-07	6.37791e-07	56	Q04756	HGFAC	Hepatocyte growth factor activator	HGFA_HUMAN	1	60.5814	1.60581	Dengue	QC	NaN	NaN	NaN	47.7705	0.130209
Dengue / QC	_DIFTGLIGPM[Oxidation (M)]K_	P00450	1.1658	1.1658	3.10979e-07	6.40003e-07	32	P00450	CP	Ceruloplasmin	CERU_HUMAN	1	124.358	2.24358	Dengue	QC	NaN	NaN	NaN	16.315	0.17801
Dengue / QC	_LKFIIPSPK_	P04114	0.458487	0.458487	3.12355e-07	6.42599e-07	62	P04114	APOB	Apolipoprotein B-100	APOB_HUMAN	1	37.41	1.3741	Dengue	QC	NaN	NaN	NaN	51.4987	0.0899415
Dengue / QC	_GDTYPAELYITGSILR_	P05160	0.445198	0.445198	3.20005e-07	6.57611e-07	138	P05160	F13B	Coagulation factor XIII B chain	F13B_HUMAN	1	36.1501	1.3615	Dengue	QC	NaN	NaN	NaN	74.9836	0.0930576
Dengue / QC	_YQC[Carbamidomethyl (C)]KNYYK_	P00738	4.76206	4.76206	3.22108e-07	6.60721e-07	40	P00738	HP	Haptoglobin	HPT_HUMAN	1	2613.46	27.1346	Dengue	QC	NaN	NaN	NaN	24.4538	0.538931
Dengue / QC	_QSTLVLFPGDLR_	P14780	1.06158	1.06158	3.26652e-07	6.69063e-07	64	P14780	MMP9	Matrix metalloproteinase-9	MMP9_HUMAN	1	108.721	2.08721	Dengue	QC	NaN	NaN	NaN	48.3951	0.217659
Dengue / QC	_APDAGGC[Carbamidomethyl (C)]LHADPDLGVLC[Carbamidomethyl (C)]PTGC[Carbamidomethyl (C)]QLQEALLQQERPIR_	P02675	2.20745	2.20745	3.33411e-07	6.82159e-07	28	P02675	FGB	Fibrinogen beta chain	FIBB_HUMAN	1	361.857	4.61857	Dengue	QC	NaN	NaN	NaN	20.0007	0.269839
Dengue / QC	_DSGVPDR[Dimethyl (KR)]FSGSGSGTDFTLK_	P06310	0.95719	0.95719	3.41639e-07	6.97975e-07	40	P06310	IGKV2-30	Immunoglobulin kappa variable 2-30	KV230_HUMAN	1	94.1525	1.94153	Dengue	QC	NaN	NaN	NaN	34.7005	0.15776
Dengue / QC	_RSDFASNC[Carbamidomethyl (C)]C[Carbamidomethyl (C)]SINSPPLYC[Carbamidomethyl (C)]DSEIDAELKNIL_	P02774;P02774-3	1.24073	1.24073	3.46512e-07	7.06791e-07	54	P02774;P02774-3	GC	Vitamin D-binding protein;Isoform 3 of Vitamin D-binding protein	VTDB_HUMAN	1	136.318	2.36318	Dengue	QC	NaN	NaN	NaN	34.1312	0.165025
Dengue / QC	_QAAGSGHLLALGTPENPSWLSLHLQDQK_	I3L145;P04278	0.615912	0.615912	3.49459e-07	7.11358e-07	52	I3L145;P04278	SHBG	Sex hormone-binding globulin	I3L145_HUMAN;SHBG_HUMAN	1	53.2526	1.53253	Dengue	QC	NaN	NaN	NaN	31.7788	0.168847
Dengue / QC	_GRTLEIPGNSDPNM[Oxidation (M)]IPDGDFNSYVR_	P0C0L5	1.88344	1.88344	3.5636e-07	7.24616e-07	94	P0C0L5	C4B	Complement C4-B	CO4B_HUMAN	1	268.953	3.68953	Dengue	QC	NaN	NaN	NaN	84.954	0.291418
Dengue / QC	_ANRPFLVFIREVPLNTIIFMGR_	P01008	1.00555	1.00555	3.63805e-07	7.38682e-07	176	P01008	SERPINC1	Antithrombin-III	ANT3_HUMAN	1	100.771	2.00771	Dengue	QC	NaN	NaN	NaN	65.4641	0.130001
Dengue / QC	_GYQLSDVDGVTC[Carbamidomethyl (C)]EDIDEC[Carbamidomethyl (C)]ALPTGGHIC[Carbamidomethyl (C)]SYR_	P23142	1.0332	1.0332	3.65506e-07	7.41866e-07	84	P23142	FBLN1	Fibulin-1	FBLN1_HUMAN	1	104.656	2.04656	Dengue	QC	NaN	NaN	NaN	66.8463	0.139571
Dengue / QC	_GQPLSPEK_	P01871	-0.590232	0.590232	3.6666e-07	7.43402e-07	158	P01871	IGHM	Immunoglobulin heavy constant mu	IGHM_HUMAN	1	-33.5764	0.664236	Dengue	QC	NaN	NaN	NaN	65.4036	0.103928
Dengue / QC	_VGSPNAAVLWLWSSHNRVNAR_	O00391	1.10342	1.10342	3.68402e-07	7.46664e-07	52	O00391	QSOX1	Sulfhydryl oxidase 1	QSOX1_HUMAN	1	114.863	2.14863	Dengue	QC	NaN	NaN	NaN	36.9054	0.196752
Dengue / QC	_GVALHRPDVYLLPPAR_	P01871	-0.537271	0.537271	3.71979e-07	7.53097e-07	176	P01871	IGHM	Immunoglobulin heavy constant mu	IGHM_HUMAN	1	-31.0927	0.689073	Dengue	QC	NaN	NaN	NaN	51.9856	0.0917785
Dengue / QC	_FSMPSPVR_	A0A0C4DFP6;Q9NQ79;Q9NQ79-2	0.866867	0.866867	3.72168e-07	7.53207e-07	56	A0A0C4DFP6;Q9NQ79;Q9NQ79-2	CRTAC1	Cartilage acidic protein 1;Cartilage acidic protein 1;Isoform 2 of Cartilage acidic protein 1	A0A0C4DFP6_HUMAN;CRAC1_HUMAN;CRAC1_HUMAN	1	82.3698	1.8237	Dengue	QC	NaN	NaN	NaN	30.8409	0.182363
Dengue / QC	_RPWNVASLIYETK_	P02748	-0.584562	0.584562	3.7268e-07	7.53699e-07	176	P02748	C9	Complement component C9	CO9_HUMAN	1	-33.3148	0.666852	Dengue	QC	NaN	NaN	NaN	52.887	0.0994709
Dengue / QC	_VTASSPVAVLSGHSC[Carbamidomethyl (C)]AQK_	Q9Y6R7	1.25556	1.25556	3.76587e-07	7.60776e-07	54	Q9Y6R7	FCGBP	IgGFc-binding protein	FCGBP_HUMAN	1	138.76	2.3876	Dengue	QC	NaN	NaN	NaN	42.0447	0.208849
Dengue / QC	_ISTSLPVLDLIDAIQPGSINYDLLK_	P13796	0.735939	0.735939	3.765e-07	7.60776e-07	48	P13796	LCP1	Plastin-2	PLSL_HUMAN	1	66.5482	1.66548	Dengue	QC	NaN	NaN	NaN	41.212	0.132186
Dengue / QC	_EPQVYTLPPSRDELTKNQVSLTC[Carbamidomethyl (C)]LVK_	P01857	1.21836	1.21836	3.81228e-07	7.69466e-07	100	P01857	IGHG1	Immunoglobulin heavy constant gamma 1	IGHG1_HUMAN	1	132.682	2.32682	Dengue	QC	NaN	NaN	NaN	92.9146	0.235253
Dengue / QC	_DIPQPHAEPWAFSLDLGLK_	I3L145;P04278	0.994725	0.994725	3.81634e-07	7.69863e-07	120	I3L145;P04278	SHBG	Sex hormone-binding globulin	I3L145_HUMAN;SHBG_HUMAN	1	99.27	1.9927	Dengue	QC	NaN	NaN	NaN	90.6529	0.156965
Dengue / QC	_SVLRPSQFGGQPC[Carbamidomethyl (C)]TAPLVAFQPC[Carbamidomethyl (C)]IPSKLC[Carbamidomethyl (C)]K_	P13671	1.28481	1.28481	3.8185e-07	7.70021e-07	86	P13671	C6	Complement component C6	CO6_HUMAN	1	143.651	2.43651	Dengue	QC	NaN	NaN	NaN	60.8736	0.222001
Dengue / QC	_IIGGSDADIK_	P09871	0.489236	0.489236	3.83646e-07	7.73085e-07	42	P09871	C1S	Complement C1s subcomponent	C1S_HUMAN	1	40.3701	1.4037	Dengue	QC	NaN	NaN	NaN	34.1918	0.102358
Dengue / QC	_LIQGAPTIR_	P18065	1.10582	1.10582	3.88916e-07	7.82581e-07	48	P18065	IGFBP2	Insulin-like growth factor-binding protein 2	IBP2_HUMAN	1	115.221	2.15221	Dengue	QC	NaN	NaN	NaN	39.846	0.215533
Dengue / QC	_VGLSGM[Oxidation (M)]AIADVTLLSGFHALR_	P0C0L5	-0.0668019	0.0668019	3.89856e-07	7.84189e-07	78	P0C0L5	C4B	Complement C4-B	CO4B_HUMAN	1	-4.52479	0.954752	Dengue	QC	NaN	NaN	NaN	65.4866	0.165862
Dengue / QC	_ASGYTFTGYYMHWVR_	P23083	0.979117	0.979117	3.91655e-07	7.87527e-07	50	P23083	IGHV1-2	Immunoglobulin heavy variable 1-2	HV102_HUMAN	1	97.1259	1.97126	Dengue	QC	NaN	NaN	NaN	39.6776	0.215712
Dengue / QC	_VTISVDTSK_	P06331	-0.592528	0.592528	4.00008e-07	8.03458e-07	174	P06331	IGHV4-34	Immunoglobulin heavy variable 4-34	HV434_HUMAN	1	-33.682	0.66318	Dengue	QC	NaN	NaN	NaN	61.0823	0.109362
Dengue / QC	_FSGSGAGTDFTLK_	A0A0C4DH68	-0.498098	0.498098	4.00501e-07	8.04158e-07	174	A0A0C4DH68	IGKV2-24	Immunoglobulin kappa variable 2-24	KV224_HUMAN	1	-29.196	0.70804	Dengue	QC	NaN	NaN	NaN	95.204	0.077697
Dengue / QC	_YYWGGQYTWDM[Oxidation (M)]AK_	P02675	2.33381	2.33381	4.17995e-07	8.36885e-07	28	P02675	FGB	Fibrinogen beta chain	FIBB_HUMAN	1	404.134	5.04134	Dengue	QC	NaN	NaN	NaN	12.1898	0.230482
Dengue / QC	_NQEC[Carbamidomethyl (C)]IALPENIC[Carbamidomethyl (C)]GIGWHLVGNSC[Carbamidomethyl (C)]LK_	O75882;O75882-2;O75882-3	0.746725	0.746725	4.18367e-07	8.37332e-07	102	O75882;O75882-2;O75882-3	ATRN	Attractin;Isoform 2 of Attractin;Isoform 3 of Attractin	ATRN_HUMAN	1	67.798	1.67798	Dengue	QC	NaN	NaN	NaN	40.4305	0.103731
Dengue / QC	_SGGRTEHPFTVEEFVLPK_	P01023	-0.419994	0.419994	4.19608e-07	8.39216e-07	176	P01023	A2M	Alpha-2-macroglobulin	A2MG_HUMAN	1	-25.2572	0.747428	Dengue	QC	NaN	NaN	NaN	61.7274	0.0773931
Dengue / QC	_TQFNNNEYSQDLDAYNTKDKIGVELTGR_	P04114	0.687523	0.687523	4.19952e-07	8.39605e-07	120	P04114	APOB	Apolipoprotein B-100	APOB_HUMAN	1	61.0516	1.61052	Dengue	QC	NaN	NaN	NaN	106.537	0.14822
Dengue / QC	_VTEENKELANELR_	P07996	1.04298	1.04298	4.21611e-07	8.42621e-07	32	P07996	THBS1	Thrombospondin-1	TSP1_HUMAN	1	106.048	2.06048	Dengue	QC	NaN	NaN	NaN	7.57676	0.0839572
Dengue / QC	_IGEKWDR_	P02751;P02751-15;P02751-3;P02751-7	1.38631	1.38631	4.22033e-07	8.43164e-07	54	P02751;P02751-15;P02751-3;P02751-7	FN1	Fibronectin;Isoform 15 of Fibronectin;Isoform 3 of Fibronectin;Isoform 7 of Fibronectin	FINC_HUMAN	1	161.41	2.6141	Dengue	QC	NaN	NaN	NaN	43.6649	0.196544
Dengue / QC	_KAPDAGGC[Carbamidomethyl (C)]LHADPDLGVLC[Carbamidomethyl (C)]PTGC[Carbamidomethyl (C)]QLQEALLQQERPIR_	P02675	1.87916	1.87916	4.23633e-07	8.45756e-07	122	P02675	FGB	Fibrinogen beta chain	FIBB_HUMAN	1	267.86	3.6786	Dengue	QC	NaN	NaN	NaN	106.585	0.347797
Dengue / QC	_SILFLGK_	P05543	-0.572181	0.572181	4.24045e-07	8.46279e-07	174	P05543	SERPINA7	Thyroxine-binding globulin	THBG_HUMAN	1	-32.7401	0.672599	Dengue	QC	NaN	NaN	NaN	52.8	0.0934062
Dengue / QC	_HRQGPVNLLSDPEQGVEVTGQYEREK_	Q14624	0.886869	0.886869	4.26924e-07	8.51417e-07	160	Q14624	ITIH4	Inter-alpha-trypsin inhibitor heavy chain H4	ITIH4_HUMAN	1	84.9159	1.84916	Dengue	QC	NaN	NaN	NaN	143.316	0.148688
Dengue / QC	_DSDWPFC[Carbamidomethyl (C)]SDEDWNYKC[Carbamidomethyl (C)]PSGC[Carbamidomethyl (C)]R_	P02671	1.87565	1.87565	4.37256e-07	8.69547e-07	38	P02671	FGA	Fibrinogen alpha chain	FIBA_HUMAN	1	266.968	3.66968	Dengue	QC	NaN	NaN	NaN	30.1271	0.226823
Dengue / QC	_TGESAEFVC[Carbamidomethyl (C)]K_	Q03591	0.705161	0.705161	4.64546e-07	9.17953e-07	134	Q03591	CFHR1	Complement factor H-related protein 1	FHR1_HUMAN	1	63.0326	1.63033	Dengue	QC	NaN	NaN	NaN	103.078	0.123959
Dengue / QC	_LSITGTYDLKSVLGQLGITKVFSNGADLSGVTEEAPLK_	P01009	0.80785	0.80785	4.83261e-07	9.52583e-07	176	P01009	SERPINA1	Alpha-1-antitrypsin	A1AT_HUMAN	1	75.0601	1.7506	Dengue	QC	NaN	NaN	NaN	125.029	0.109623
Dengue / QC	_VTISVDTSK[Methyl (KR)]_	P06331	-0.764419	0.764419	4.9044e-07	9.64699e-07	162	P06331	IGHV4-34	Immunoglobulin heavy variable 4-34	HV434_HUMAN	1	-41.131	0.58869	Dengue	QC	NaN	NaN	NaN	54.2829	0.127643
Dengue / QC	_NIPC[Carbamidomethyl (C)]AVTK_	P13671	0.695709	0.695709	4.92071e-07	9.67567e-07	36	P13671	C6	Complement component C6	CO6_HUMAN	1	61.968	1.61968	Dengue	QC	NaN	NaN	NaN	15.9423	0.105082
Dengue / QC	_FPKAEFAEVSKLVTDLTK_	P02768	0.852472	0.852472	4.94938e-07	9.72864e-07	152	P02768	ALB	Serum albumin	ALBU_HUMAN	1	80.5592	1.80559	Dengue	QC	NaN	NaN	NaN	143.727	0.187397
Dengue / QC	_C[Carbamidomethyl (C)]QC[Carbamidomethyl (C)]DELC[Carbamidomethyl (C)]SYYQSC[Carbamidomethyl (C)]C[Carbamidomethyl (C)]TDYTAEC[Carbamidomethyl (C)]KPQVTR_	P04004	0.390909	0.390909	5.10859e-07	1.00065e-06	176	P04004	VTN	Vitronectin	VTNC_HUMAN	1	31.122	1.31122	Dengue	QC	NaN	NaN	NaN	98.6559	0.0634759
Dengue / QC	_LEEAEKAADESER_	P67936	0.785777	0.785777	5.26313e-07	1.02912e-06	32	P67936	TPM4	Tropomyosin alpha-4 chain	TPM4_HUMAN	1	72.402	1.72402	Dengue	QC	NaN	NaN	NaN	21.4901	0.118196
Dengue / QC	_TIKVPMMYGAGK_	G3V2W1;Q9UK55	0.640421	0.640421	5.26585e-07	1.02929e-06	42	G3V2W1;Q9UK55	SERPINA10	Protein Z-dependent protease inhibitor	G3V2W1_HUMAN;ZPI_HUMAN	1	55.8784	1.55878	Dengue	QC	NaN	NaN	NaN	24.9896	0.105806
Dengue / QC	_NSADNKVVC[Carbamidomethyl (C)]SC[Carbamidomethyl (C)]TEGYR_	P00740	0.674357	0.674357	5.5069e-07	1.07304e-06	100	P00740	F9	Coagulation factor IX	FA9_HUMAN	1	59.5885	1.59589	Dengue	QC	NaN	NaN	NaN	88.0395	0.115678
Dengue / QC	_TAGWNIPM[Oxidation (M)]GLLYNKINHC[Carbamidomethyl (C)]RFDEFFSEGC[Carbamidomethyl (C)]APGSK_	P02787	2.4685	2.4685	5.53111e-07	1.07738e-06	136	P02787	TF	Serotransferrin	TRFE_HUMAN	1	453.469	5.53469	Dengue	QC	NaN	NaN	NaN	100.435	0.278944
Dengue / QC	_PQYMVLVPSLLHTETTEK_	P01023	0.581806	0.581806	5.60416e-07	1.09123e-06	112	P01023	A2M	Alpha-2-macroglobulin	A2MG_HUMAN	1	49.6722	1.49672	Dengue	QC	NaN	NaN	NaN	99.4569	0.105731
Dengue / QC	_LTVDKSR_	P01857	0.947979	0.947979	5.6861e-07	1.10565e-06	144	P01857	IGHG1	Immunoglobulin heavy constant gamma 1	IGHG1_HUMAN	1	92.9169	1.92917	Dengue	QC	NaN	NaN	NaN	105.096	0.202984
Dengue / QC	_SGLSTGWTQLSK_	P04217	-0.400806	0.400806	5.69425e-07	1.10647e-06	176	P04217	A1BG	Alpha-1B-glycoprotein	A1BG_HUMAN	1	-24.2565	0.757435	Dengue	QC	NaN	NaN	NaN	54.3532	0.0682229
Dengue / QC	_ETTLGDMTGK_	P80108	0.457292	0.457292	5.84134e-07	1.13309e-06	60	P80108	GPLD1	Phosphatidylinositol-glycan-specific phospholipase D	PHLD_HUMAN	1	37.2963	1.37296	Dengue	QC	NaN	NaN	NaN	52.3605	0.0857869
Dengue / QC	_MNVAPAC[Carbamidomethyl (C)]LPERDWAESTLMTQK_	P00742	0.412937	0.412937	5.89189e-07	1.1425e-06	138	P00742	F10	Coagulation factor X	FA10_HUMAN	1	33.1394	1.33139	Dengue	QC	NaN	NaN	NaN	98.8657	0.0715718
Dengue / QC	_EPAAQAPVK_	A0A0A0MS09;P01880;P01880-2	2.00135	2.00135	5.93105e-07	1.1489e-06	20	A0A0A0MS09;P01880;P01880-2	IGHD	Immunoglobulin heavy constant delta (Fragment);Immunoglobulin heavy constant delta;Isoform 2 of Immunoglobulin heavy constant delta	A0A0A0MS09_HUMAN;IGHD_HUMAN;IGHD_HUMAN	1	300.374	4.00374	Dengue	QC	NaN	NaN	NaN	13.0618	0.271864
Dengue / QC	_EPQVYTLPPSQEEMTKNQVSLTC[Carbamidomethyl (C)]LVK_	P01861	0.808707	0.808707	5.95102e-07	1.15234e-06	136	P01861	IGHG4	Immunoglobulin heavy constant gamma 4	IGHG4_HUMAN	1	75.1641	1.75164	Dengue	QC	NaN	NaN	NaN	123.919	0.118327
Dengue / QC	_TRFVYHLSDLC[Carbamidomethyl (C)]KK_	P01591	1.48904	1.48904	6.03394e-07	1.16721e-06	70	P01591	JCHAIN	Immunoglobulin J chain	IGJ_HUMAN	1	180.703	2.80703	Dengue	QC	NaN	NaN	NaN	63.2208	0.239349
Dengue / QC	_WSSPPQC[Carbamidomethyl (C)]EGLPC[Carbamidomethyl (C)]KSPPEISHGVVAHMSDSYQYGEEVTYK_	P08603	1.33869	1.33869	6.06197e-07	1.17102e-06	76	P08603	CFH	Complement factor H	CFAH_HUMAN	1	152.921	2.52921	Dengue	QC	NaN	NaN	NaN	64.0595	0.216657
Dengue / QC	_SLHTLFGDK[Methyl (KR)]LC[Carbamidomethyl (C)]TVATLR_	P02768	0.692956	0.692956	6.10665e-07	1.17843e-06	112	P02768	ALB	Serum albumin	ALBU_HUMAN	1	61.6592	1.61659	Dengue	QC	NaN	NaN	NaN	20.8689	0.260792
Dengue / QC	_VASYAAWIDSVLA_	K7ERG9;P00746	0.854536	0.854536	6.11194e-07	1.17866e-06	130	K7ERG9;P00746	CFD	Complement factor D	K7ERG9_HUMAN;CFAD_HUMAN	1	80.8177	1.80818	Dengue	QC	NaN	NaN	NaN	120.806	0.149763
Dengue / QC	_AVGSGATFSHYYYMILSRGQIVFMNREPK_	P0C0L5	0.516544	0.516544	6.19236e-07	1.19251e-06	132	P0C0L5	C4B	Complement C4-B	CO4B_HUMAN	1	43.0524	1.43052	Dengue	QC	NaN	NaN	NaN	78.8788	0.0950314
Dengue / QC	_FPEVDVLTK_	P04114	-0.47622	0.47622	6.249e-07	1.20259e-06	172	P04114	APOB	Apolipoprotein B-100	APOB_HUMAN	1	-28.1141	0.718859	Dengue	QC	NaN	NaN	NaN	65.4848	0.0792245
Dengue / QC	_C[Carbamidomethyl (C)]NM[Oxidation (M)]GYEYSER_	P08603	0.754469	0.754469	6.48086e-07	1.24422e-06	60	P08603	CFH	Complement factor H	CFAH_HUMAN	1	68.7011	1.68701	Dengue	QC	NaN	NaN	NaN	45.4923	0.186772
Dengue / QC	_ADLEKLTSLSDRYVSHFETEGPHVLLYFDSVPTSR_	P0C0L5	0.489429	0.489429	6.48629e-07	1.24483e-06	106	P0C0L5	C4B	Complement C4-B	CO4B_HUMAN	1	40.3889	1.40389	Dengue	QC	NaN	NaN	NaN	77.5625	0.107196
Dengue / QC	_QSGSEC[Carbamidomethyl (C)]IC[Carbamidomethyl (C)]M[Oxidation (M)]SPEEDC[Carbamidomethyl (C)]SHHSEDLC[Carbamidomethyl (C)]VFDTDSNDYFTSPAC[Carbamidomethyl (C)]K_	P13671	0.9723	0.9723	6.4923e-07	1.24556e-06	24	P13671	C6	Complement component C6	CO6_HUMAN	1	96.1966	1.96197	Dengue	QC	NaN	NaN	NaN	17.9052	0.0849397
Dengue / QC	_C[Carbamidomethyl (C)]LVNLIEKVASYGVKPR_	B4E1Z4	0.517619	0.517619	6.50104e-07	1.24681e-06	104	B4E1Z4	NaN	cDNA FLJ55673, highly similar to Complement factor B (EC 3.4.21.47)	B4E1Z4_HUMAN	1	43.1591	1.43159	Dengue	QC	NaN	NaN	NaN	68.5003	0.103233
Dengue / QC	_VPQVSTPTLVEVSRNLGKVGSK_	P02768	1.86143	1.86143	6.50846e-07	1.24747e-06	50	P02768	ALB	Serum albumin	ALBU_HUMAN	1	263.368	3.63368	Dengue	QC	NaN	NaN	NaN	38.471	0.26469
Dengue / QC	_ASTPNGYDNGIIWATWK_	P02679;P02679-2	1.47331	1.47331	6.50893e-07	1.24747e-06	44	P02679;P02679-2	FGG	Fibrinogen gamma chain;Isoform Gamma-A of Fibrinogen gamma chain	FIBG_HUMAN	1	177.659	2.77659	Dengue	QC	NaN	NaN	NaN	37.0861	0.199911
Dengue / QC	_SPLFMGK_	P01009	-0.334952	0.334952	6.51511e-07	1.24823e-06	176	P01009	SERPINA1	Alpha-1-antitrypsin	A1AT_HUMAN	1	-20.7189	0.792811	Dengue	QC	NaN	NaN	NaN	92.0801	0.0636625
Dengue / QC	_IGLDLPALNMQR_	P05164;P05164-2;P05164-3	0.932367	0.932367	6.54085e-07	1.2523e-06	44	P05164;P05164-2;P05164-3	MPO	Myeloperoxidase;Isoform H14 of Myeloperoxidase;Isoform H7 of Myeloperoxidase	PERM_HUMAN	1	90.8405	1.9084	Dengue	QC	NaN	NaN	NaN	33.8714	0.194791
Dengue / QC	_EEM[Oxidation (M)]TKNQVSLTC[Carbamidomethyl (C)]LVK_	P01860	1.5355	1.5355	6.5615e-07	1.25583e-06	120	P01860	IGHG3	Immunoglobulin heavy constant gamma 3	IGHG3_HUMAN	1	189.889	2.89889	Dengue	QC	NaN	NaN	NaN	97.674	0.231454
Dengue / QC	_LASVSVSR_	Q9Y6R7	1.59988	1.59988	6.61922e-07	1.26515e-06	32	Q9Y6R7	FCGBP	IgGFc-binding protein	FCGBP_HUMAN	1	203.119	3.03119	Dengue	QC	NaN	NaN	NaN	21.3672	0.241296
Dengue / QC	_KEVYMPSSIFQDDFVIPDISEPGTWK_	P0C0L5	0.991521	0.991521	6.66168e-07	1.27283e-06	94	P0C0L5	C4B	Complement C4-B	CO4B_HUMAN	1	98.828	1.98828	Dengue	QC	NaN	NaN	NaN	55.506	0.14966
Dengue / QC	_TSNFNAAISLK_	P02748	-0.410248	0.410248	6.84939e-07	1.30647e-06	176	P02748	C9	Complement component C9	CO9_HUMAN	1	-24.7506	0.752494	Dengue	QC	NaN	NaN	NaN	90.4472	0.0757584
Dengue / QC	_WTPPRAQITGYR_	P02751;P02751-15;P02751-3;P02751-7	1.27079	1.27079	6.93697e-07	1.32182e-06	32	P02751;P02751-15;P02751-3;P02751-7	FN1	Fibronectin;Isoform 15 of Fibronectin;Isoform 3 of Fibronectin;Isoform 7 of Fibronectin	FINC_HUMAN	1	141.293	2.41293	Dengue	QC	NaN	NaN	NaN	26.3164	0.221223
Dengue / QC	_A[Acetyl (Protein N-term)]GWNAYIDNLMADGTC[Carbamidomethyl (C)]QDAAIVGYK_	P07737	0.55221	0.55221	6.97658e-07	1.32847e-06	48	P07737	PFN1	Profilin-1	PROF1_HUMAN	1	46.6331	1.46633	Dengue	QC	NaN	NaN	NaN	41.2483	0.138715
Dengue / QC	_C[Carbamidomethyl (C)]DPHEATC[Carbamidomethyl (C)]YDDGK_	P02751;P02751-15;P02751-3;P02751-7	1.25033	1.25033	7.08283e-07	1.34595e-06	44	P02751;P02751-15;P02751-3;P02751-7	FN1	Fibronectin;Isoform 15 of Fibronectin;Isoform 3 of Fibronectin;Isoform 7 of Fibronectin	FINC_HUMAN	1	137.895	2.37895	Dengue	QC	NaN	NaN	NaN	31.0905	0.272559
Dengue / QC	_INHGILYDEEKYKPFSQVPTGEVFYYSC[Carbamidomethyl (C)]EYNFVSPSK_	Q03591	1.06856	1.06856	7.16587e-07	1.36081e-06	42	Q03591	CFHR1	Complement factor H-related protein 1	FHR1_HUMAN	1	109.734	2.09734	Dengue	QC	NaN	NaN	NaN	36.0069	0.153388
Dengue / QC	_AHSC[Carbamidomethyl (C)]PSVWKK_	P07225	0.773664	0.773664	7.42727e-07	1.40426e-06	72	P07225	PROS1	Vitamin K-dependent protein S	PROS_HUMAN	1	70.9606	1.70961	Dengue	QC	NaN	NaN	NaN	43.2087	0.170657
Dengue / QC	_RLGVYELLLK_	Q14624	1.00724	1.00724	7.48063e-07	1.41388e-06	18	Q14624	ITIH4	Inter-alpha-trypsin inhibitor heavy chain H4	ITIH4_HUMAN	1	101.006	2.01006	Dengue	QC	NaN	NaN	NaN	12.6725	0.134856
Dengue / QC	_QKVEPLR_	P02647	0.470802	0.470802	7.49144e-07	1.41544e-06	122	P02647	APOA1	Apolipoprotein A-I	APOA1_HUMAN	1	38.588	1.38588	Dengue	QC	NaN	NaN	NaN	47.8396	0.136745
Dengue / QC	_C[Carbamidomethyl (C)]DPHEATC[Carbamidomethyl (C)]YDDGKTYHVGEQWQK_	P02751;P02751-15;P02751-3;P02751-7	1.11539	1.11539	7.54347e-07	1.42431e-06	46	P02751;P02751-15;P02751-3;P02751-7	FN1	Fibronectin;Isoform 15 of Fibronectin;Isoform 3 of Fibronectin;Isoform 7 of Fibronectin	FINC_HUMAN	1	116.654	2.16654	Dengue	QC	NaN	NaN	NaN	33.4649	0.206085
Dengue / QC	_DGRPEIQLHNHWAQLTVGAGPR_	I3L145;P04278	0.669975	0.669975	7.81936e-07	1.47491e-06	108	I3L145;P04278	SHBG	Sex hormone-binding globulin	I3L145_HUMAN;SHBG_HUMAN	1	59.1045	1.59104	Dengue	QC	NaN	NaN	NaN	90.4139	0.116465
Dengue / QC	_IPGTC[Carbamidomethyl (C)]C[Carbamidomethyl (C)]DTC[Carbamidomethyl (C)]EEPEC[Carbamidomethyl (C)]NDITAR_	P04275	1.29823	1.29823	7.84671e-07	1.47942e-06	46	P04275	VWF	von Willebrand factor	VWF_HUMAN	1	145.926	2.45926	Dengue	QC	NaN	NaN	NaN	40.6896	0.188161
Dengue / QC	_C[Carbamidomethyl (C)]AEENC[Carbamidomethyl (C)]FIQKSDDKVTLEER_	P01024	2.85884	2.85884	7.97085e-07	1.49995e-06	30	P01024	C3	Complement C3	CO3_HUMAN	1	625.434	7.25434	Dengue	QC	NaN	NaN	NaN	7.80774	0.191461
Dengue / QC	_VQYEC[Carbamidomethyl (C)]ATGYYTAGGKK_	P05160	0.512898	0.512898	8.05896e-07	1.51501e-06	64	P05160	F13B	Coagulation factor XIII B chain	F13B_HUMAN	1	42.6914	1.42691	Dengue	QC	NaN	NaN	NaN	38.4358	0.0996366
Dengue / QC	_AAC[Carbamidomethyl (C)]LLPKLDELRDEGK_	P02768	1.86469	1.86469	8.12799e-07	1.52696e-06	144	P02768	ALB	Serum albumin	ALBU_HUMAN	1	264.189	3.64189	Dengue	QC	NaN	NaN	NaN	125.406	0.262509
Dengue / QC	_FNHLGHIFTFTPQNNEFQLQLSPK_	P04275	0.977346	0.977346	8.14469e-07	1.52959e-06	56	P04275	VWF	von Willebrand factor	VWF_HUMAN	1	96.884	1.96884	Dengue	QC	NaN	NaN	NaN	45.4528	0.214169
Dengue / QC	_TEHYEEQIEAFK_	P02748	-0.386412	0.386412	8.22479e-07	1.54289e-06	170	P02748	C9	Complement component C9	CO9_HUMAN	1	-23.497	0.76503	Dengue	QC	NaN	NaN	NaN	91.6068	0.0693144
Dengue / QC	_ATVLNYLPK_	P01023	-0.441555	0.441555	8.49041e-07	1.58866e-06	174	P01023	A2M	Alpha-2-macroglobulin	A2MG_HUMAN	1	-26.366	0.73634	Dengue	QC	NaN	NaN	NaN	123.968	0.0796647
Dengue / QC	_DYFMPC[Carbamidomethyl (C)]PGRGHGHR_	P02790	1.25471	1.25471	8.54335e-07	1.59643e-06	72	P02790	HPX	Hemopexin	HEMO_HUMAN	1	138.62	2.3862	Dengue	QC	NaN	NaN	NaN	53.2736	0.207717
Dengue / QC	_SRLDTLAQEVALLKEQQALQTVC[Carbamidomethyl (C)]LK_	E9PHK0;P05452	1.36079	1.36079	8.6183e-07	1.60829e-06	28	E9PHK0;P05452	CLEC3B	Tetranectin	E9PHK0_HUMAN;TETN_HUMAN	1	156.825	2.56825	Dengue	QC	NaN	NaN	NaN	15.0235	0.220028
Dengue / QC	_ANPTVTLFPPSSEELQANKATLVC[Carbamidomethyl (C)]LISDFYPGAVTVAWKADGSPVK_	A0A0B4J231;B9A064	1.96645	1.96645	8.72512e-07	1.62768e-06	46	A0A0B4J231;B9A064	IGLL5	Immunoglobulin lambda-like polypeptide 5	A0A0B4J231_HUMAN;IGLL5_HUMAN	1	290.805	3.90805	Dengue	QC	NaN	NaN	NaN	34.6473	0.378261
Dengue / QC	_TNTNVNC[Carbamidomethyl (C)]PIEC[Carbamidomethyl (C)]FMPLDVQADREDSRE_	P02751;P02751-15;P02751-3;P02751-7	0.763332	0.763332	8.91301e-07	1.65722e-06	120	P02751;P02751-15;P02751-3;P02751-7	FN1	Fibronectin;Isoform 15 of Fibronectin;Isoform 3 of Fibronectin;Isoform 7 of Fibronectin	FINC_HUMAN	1	69.7406	1.69741	Dengue	QC	NaN	NaN	NaN	107.961	0.136545
Dengue / QC	_C[Carbamidomethyl (C)]C[Carbamidomethyl (C)]EDGMR_	P01024	0.685633	0.685633	9.16984e-07	1.70215e-06	146	P01024	C3	Complement C3	CO3_HUMAN	1	60.8408	1.60841	Dengue	QC	NaN	NaN	NaN	51.0071	0.11188
Dengue / QC	_NFDEILR_	P30041	1.78062	1.78062	9.21909e-07	1.70959e-06	18	P30041	PRDX6	Peroxiredoxin-6	PRDX6_HUMAN	1	243.574	3.43574	Dengue	QC	NaN	NaN	NaN	7.96138	0.150242
Dengue / QC	_SQFVQPIC[Carbamidomethyl (C)]LPEPGSTFPAGHK_	Q04756	0.290346	0.290346	9.27313e-07	1.71733e-06	118	Q04756	HGFAC	Hepatocyte growth factor activator	HGFA_HUMAN	1	22.2933	1.22293	Dengue	QC	NaN	NaN	NaN	100.618	0.0767777
Dengue / QC	_SVTC[Carbamidomethyl (C)]HVK_	A0A0G2JMB2	1.14957	1.14957	9.27614e-07	1.71733e-06	94	A0A0G2JMB2	IGHA2	Immunoglobulin heavy constant alpha 2 (Fragment)	A0A0G2JMB2_HUMAN	1	121.847	2.21847	Dengue	QC	NaN	NaN	NaN	82.7259	0.206387
Dengue / QC	_TVDKSTGKPTLYNVSLVM[Oxidation (M)]SDTAGTC[Carbamidomethyl (C)]Y_	P01871	1.96765	1.96765	9.28456e-07	1.71832e-06	18	P01871	IGHM	Immunoglobulin heavy constant mu	IGHM_HUMAN	1	291.131	3.91131	Dengue	QC	NaN	NaN	NaN	8.30649	0.536842
Dengue / QC	_AGAEPASER_	P01042-2	1.36999	1.36999	9.5232e-07	1.75965e-06	74	P01042-2	KNG1	Isoform LMW of Kininogen-1	KNG1_HUMAN	1	158.468	2.58468	Dengue	QC	NaN	NaN	NaN	43.5955	0.201245
Dengue / QC	_LRC[Carbamidomethyl (C)]NGDNDC[Carbamidomethyl (C)]GDFSDEDDC[Carbamidomethyl (C)]ESEPRPPC[Carbamidomethyl (C)]R_	P02748	0.736499	0.736499	9.52361e-07	1.75965e-06	110	P02748	C9	Complement component C9	CO9_HUMAN	1	66.6128	1.66613	Dengue	QC	NaN	NaN	NaN	72.5716	0.113209
Dengue / QC	_DSGEDPATC[Carbamidomethyl (C)]AFQR_	Q13103	0.306651	0.306651	9.55883e-07	1.765e-06	70	Q13103	SPP2	Secreted phosphoprotein 24	SPP24_HUMAN	1	23.6833	1.23683	Dengue	QC	NaN	NaN	NaN	63.3494	0.105276
Dengue / QC	_TIHLTMPQLVLQGSYDLQDLLAQAELPAILHTELNLQK_	P01019	1.0609	1.0609	9.81828e-07	1.81052e-06	82	P01019	AGT	Angiotensinogen	ANGT_HUMAN	1	108.623	2.08623	Dengue	QC	NaN	NaN	NaN	38.7866	0.153207
Dengue / QC	_WYQMGIVSWGEGC[Carbamidomethyl (C)]DRDGK_	P00734	0.578031	0.578031	9.98545e-07	1.83711e-06	30	P00734	F2	Prothrombin	THRB_HUMAN	1	49.2811	1.49281	Dengue	QC	NaN	NaN	NaN	12.1401	0.082899
Dengue / QC	_HLSQDTGSPSGMRPWEDLPSQDTGSPSR_	A0A0A0MRJ7;P12259	0.620015	0.620015	9.9931e-07	1.83792e-06	50	A0A0A0MRJ7;P12259	F5	Coagulation factor V	A0A0A0MRJ7_HUMAN;FA5_HUMAN	1	53.6891	1.53689	Dengue	QC	NaN	NaN	NaN	32.8821	0.129731
Dengue / QC	_DTSISTAYMELSR[Dimethyl (KR)]_	P23083	1.08504	1.08504	1.01924e-06	1.87028e-06	36	P23083	IGHV1-2	Immunoglobulin heavy variable 1-2	HV102_HUMAN	1	112.144	2.12144	Dengue	QC	NaN	NaN	NaN	7.91767	0.0947823
Dengue / QC	_TGESVEFVC[Carbamidomethyl (C)]K_	P08603	0.476013	0.476013	1.02247e-06	1.87436e-06	176	P08603	CFH	Complement factor H	CFAH_HUMAN	1	39.0895	1.39089	Dengue	QC	NaN	NaN	NaN	110.963	0.0775703
Dengue / QC	_TNPC[Carbamidomethyl (C)]LHGGR_	P00748	1.54355	1.54355	1.02885e-06	1.88544e-06	76	P00748	F12	Coagulation factor XII	FA12_HUMAN	1	191.511	2.91511	Dengue	QC	NaN	NaN	NaN	64.3115	0.25555
Dengue / QC	_C[Carbamidomethyl (C)]C[Carbamidomethyl (C)]ESASEDC[Carbamidomethyl (C)]MAKELPEHTVK_	P02774;P02774-3	1.37285	1.37285	1.04809e-06	1.91819e-06	118	P02774;P02774-3	GC	Vitamin D-binding protein;Isoform 3 of Vitamin D-binding protein	VTDB_HUMAN	1	158.983	2.58983	Dengue	QC	NaN	NaN	NaN	97.8254	0.236119
Dengue / QC	_AFQPFFVELTMPYSVIR_	P01023	0.455429	0.455429	1.06405e-06	1.94572e-06	176	P01023	A2M	Alpha-2-macroglobulin	A2MG_HUMAN	1	37.119	1.37119	Dengue	QC	NaN	NaN	NaN	165.447	0.0895836
Dengue / QC	_LALDNGGLAR_	Q14624	-0.361898	0.361898	1.07629e-06	1.96595e-06	176	Q14624	ITIH4	Inter-alpha-trypsin inhibitor heavy chain H4	ITIH4_HUMAN	1	-22.186	0.77814	Dengue	QC	NaN	NaN	NaN	68.4186	0.0641985
Dengue / QC	_TNLESILSYPKDFTC[Carbamidomethyl (C)]VHQALKGFTTK_	P05155;P05155-3	0.751813	0.751813	1.08635e-06	1.98238e-06	54	P05155;P05155-3	SERPING1	Plasma protease C1 inhibitor;Isoform 3 of Plasma protease C1 inhibitor	IC1_HUMAN	1	68.3907	1.68391	Dengue	QC	NaN	NaN	NaN	35.8493	0.103275
Dengue / QC	_YVTC[Carbamidomethyl (C)]SNGDWSEPPR_	Q92496;Q92496-2	0.611823	0.611823	1.09475e-06	1.99574e-06	44	Q92496;Q92496-2	CFHR4	Complement factor H-related protein 4;Isoform 2 of Complement factor H-related protein 4	FHR4_HUMAN	1	52.8189	1.52819	Dengue	QC	NaN	NaN	NaN	17.6813	0.153308
Dengue / QC	_SGQAPVLVIYEDSK[Methyl (KR)]RPSGIPER_	A0A075B6K4	1.32081	1.32081	1.09509e-06	1.99574e-06	40	A0A075B6K4	IGLV3-10	Immunoglobulin lambda variable 3-10	LV310_HUMAN	1	149.806	2.49806	Dengue	QC	NaN	NaN	NaN	31.5496	0.2376
Dengue / QC	_GATTSPGVYELSSR_	Q9Y6R7	0.833521	0.833521	1.10374e-06	2.00954e-06	156	Q9Y6R7	FCGBP	IgGFc-binding protein	FCGBP_HUMAN	1	78.2029	1.78203	Dengue	QC	NaN	NaN	NaN	131.034	0.149956
Dengue / QC	_ITITNDQNR_	P11021	1.7731	1.7731	1.11602e-06	2.02991e-06	18	P11021	HSPA5	78 kDa glucose-regulated protein	GRP78_HUMAN	1	241.788	3.41788	Dengue	QC	NaN	NaN	NaN	7.73772	0.602152
Dengue / QC	_YIEKIQPSGGTNINEALLR_	P19823	0.468918	0.468918	1.12396e-06	2.04304e-06	102	P19823	ITIH2	Inter-alpha-trypsin inhibitor heavy chain H2	ITIH2_HUMAN	1	38.4071	1.38407	Dengue	QC	NaN	NaN	NaN	89.1436	0.0761711
Dengue / QC	_YNILPEKEDSPFALK_	P20742	2.14827	2.14827	1.14809e-06	2.08284e-06	108	P20742	PZP	Pregnancy zone protein	PZP_HUMAN	1	343.297	4.43297	Dengue	QC	NaN	NaN	NaN	72.2368	0.358279
Dengue / QC	_C[Carbamidomethyl (C)]PPPPLPINSK_	P05160	0.562388	0.562388	1.15345e-06	2.09189e-06	62	P05160	F13B	Coagulation factor XIII B chain	F13B_HUMAN	1	47.6711	1.47671	Dengue	QC	NaN	NaN	NaN	28.146	0.130616
Dengue / QC	_SLWNGDTGEC[Carbamidomethyl (C)]TDNAYIDIQLR_	P01042	0.884775	0.884775	1.15415e-06	2.09249e-06	126	P01042	KNG1	Kininogen-1	KNG1_HUMAN	1	84.6476	1.84648	Dengue	QC	NaN	NaN	NaN	30.7703	0.131514
Dengue / QC	_QKLHELQEKLSPLGEEMR_	P02647	0.633342	0.633342	1.15534e-06	2.09296e-06	102	P02647	APOA1	Apolipoprotein A-I	APOA1_HUMAN	1	55.1154	1.55115	Dengue	QC	NaN	NaN	NaN	65.696	0.360456
Dengue / QC	_C[Carbamidomethyl (C)]DPVDQC[Carbamidomethyl (C)]QDSETGTFYQIGDSWEK_	P02751;P02751-15;P02751-3;P02751-7	0.885525	0.885525	1.18381e-06	2.14132e-06	114	P02751;P02751-15;P02751-3;P02751-7	FN1	Fibronectin;Isoform 15 of Fibronectin;Isoform 3 of Fibronectin;Isoform 7 of Fibronectin	FINC_HUMAN	1	84.7437	1.84744	Dengue	QC	NaN	NaN	NaN	103.924	0.146356
Dengue / QC	_NVVFVIDK_	Q14624	-0.466004	0.466004	1.18718e-06	2.14612e-06	176	Q14624	ITIH4	Inter-alpha-trypsin inhibitor heavy chain H4	ITIH4_HUMAN	1	-27.6033	0.723967	Dengue	QC	NaN	NaN	NaN	39.7147	0.0891524
Dengue / QC	_IC[Carbamidomethyl (C)]MDEDGNEKRPGDVWTLPDQC[Carbamidomethyl (C)]HTVTC[Carbamidomethyl (C)]QPDGQTLLK_	P04275	0.683535	0.683535	1.19439e-06	2.15776e-06	70	P04275	VWF	von Willebrand factor	VWF_HUMAN	1	60.6071	1.60607	Dengue	QC	NaN	NaN	NaN	58.1726	0.119525
Dengue / QC	_LLIYDNNK[Methyl (KR)]RPSGIPDR_	P01701	0.570121	0.570121	1.20086e-06	2.16806e-06	56	P01701	IGLV1-51	Immunoglobulin lambda variable 1-51	LV151_HUMAN	1	48.4648	1.48465	Dengue	QC	NaN	NaN	NaN	35.9278	0.123234
Dengue / QC	_IYEDHDATQQLQGFYSQVAK_	P19827	0.325059	0.325059	1.20768e-06	2.17825e-06	126	P19827	ITIH1	Inter-alpha-trypsin inhibitor heavy chain H1	ITIH1_HUMAN	1	25.2716	1.25272	Dengue	QC	NaN	NaN	NaN	111.035	0.0597884
Dengue / QC	_ATLVC[Carbamidomethyl (C)]LISDFYPGAVTVAWK[Dimethyl (KR)]_	P0DOY2	0.990443	0.990443	1.21037e-06	2.18169e-06	38	P0DOY2	IGLC2	Immunoglobulin lambda constant 2	IGLC2_HUMAN	1	98.6795	1.98679	Dengue	QC	NaN	NaN	NaN	10.5263	0.160298
Dengue / QC	_AHFSPSNIILDFPAAGSAAR_	O00391	0.781356	0.781356	1.22047e-06	2.1992e-06	48	O00391	QSOX1	Sulfhydryl oxidase 1	QSOX1_HUMAN	1	71.8746	1.71875	Dengue	QC	NaN	NaN	NaN	39.7339	0.141607
Dengue / QC	_SGSSTASWIQNVDTK_	P04114	0.448931	0.448931	1.22342e-06	2.20381e-06	80	P04114	APOB	Apolipoprotein B-100	APOB_HUMAN	1	36.5029	1.36503	Dengue	QC	NaN	NaN	NaN	64.0624	0.0844891
Dengue / QC	_DGAGDVAFVK_	P02787	-0.348122	0.348122	1.24572e-06	2.24325e-06	176	P02787	TF	Serotransferrin	TRFE_HUMAN	1	-21.4394	0.785606	Dengue	QC	NaN	NaN	NaN	75.0833	0.0640698
Dengue / QC	_LMIYEVSK_	P01709	-0.657395	0.657395	1.24809e-06	2.2468e-06	174	P01709	IGLV2-8	Immunoglobulin lambda variable 2-8	LV208_HUMAN	1	-36.5978	0.634022	Dengue	QC	NaN	NaN	NaN	96.9463	0.117223
Dengue / QC	_VMDKYTFELSRR_	P02774;P02774-3	0.637686	0.637686	1.26198e-06	2.26889e-06	142	P02774;P02774-3	GC	Vitamin D-binding protein;Isoform 3 of Vitamin D-binding protein	VTDB_HUMAN	1	55.5832	1.55583	Dengue	QC	NaN	NaN	NaN	136.19	0.117272
Dengue / QC	_VSNKGLPAPIEK_	P01859	1.48819	1.48819	1.27915e-06	2.29681e-06	176	P01859	IGHG2	Immunoglobulin heavy constant gamma 2	IGHG2_HUMAN	1	180.537	2.80537	Dengue	QC	NaN	NaN	NaN	150.777	0.258399
Dengue / QC	_TPENYPNAGLTM[Oxidation (M)]NYC[Carbamidomethyl (C)]RNPDADKGPWC[Carbamidomethyl (C)]FTTDPSVR_	P00747	2.42787	2.42787	1.28022e-06	2.29801e-06	26	P00747	PLG	Plasminogen	PLMN_HUMAN	1	438.099	5.38099	Dengue	QC	NaN	NaN	NaN	17.9702	0.306469
Dengue / QC	_DSPSVWAAVPGK_	P07737	1.31801	1.31801	1.28197e-06	2.30041e-06	26	P07737	PFN1	Profilin-1	PROF1_HUMAN	1	149.321	2.49321	Dengue	QC	NaN	NaN	NaN	18.0559	0.147517
Dengue / QC	_HC[Carbamidomethyl (C)]LVTVEK_	P07225	0.541579	0.541579	1.28833e-06	2.31108e-06	74	P07225	PROS1	Vitamin K-dependent protein S	PROS_HUMAN	1	45.5565	1.45556	Dengue	QC	NaN	NaN	NaN	67.3338	0.094174
Dengue / QC	_QSSSYSFFKEEIIYEC[Carbamidomethyl (C)]DKGYILVGQAK_	P04003	0.471057	0.471057	1.29005e-06	2.31269e-06	144	P04003	C4BPA	C4b-binding protein alpha chain	C4BPA_HUMAN	1	38.6124	1.38612	Dengue	QC	NaN	NaN	NaN	83.1247	0.0921431
Dengue / QC	_VYAC[Carbamidomethyl (C)]EVTHQGLSSPVTK_	P01834	0.693386	0.693386	1.29935e-06	2.32786e-06	176	P01834	IGKC	Immunoglobulin kappa constant	IGKC_HUMAN	1	61.7074	1.61707	Dengue	QC	NaN	NaN	NaN	114.143	0.123149
Dengue / QC	_GQPREPQVYTLPPSQEEMTKNQVSLTC[Carbamidomethyl (C)]LVK_	P01861	1.13449	1.13449	1.30742e-06	2.34158e-06	66	P01861	IGHG4	Immunoglobulin heavy constant gamma 4	IGHG4_HUMAN	1	119.541	2.19541	Dengue	QC	NaN	NaN	NaN	59.3542	0.224609
Dengue / QC	_QITVNDLPVGR_	P32119	0.432877	0.432877	1.31859e-06	2.36083e-06	116	P32119	PRDX2	Peroxiredoxin-2	PRDX2_HUMAN	1	34.9923	1.34992	Dengue	QC	NaN	NaN	NaN	108.654	0.0788924
Dengue / QC	_TLIEKTNEER_	P10909;P10909-2;P10909-4;P10909-5	0.47152	0.47152	1.33769e-06	2.39121e-06	138	P10909;P10909-2;P10909-4;P10909-5	CLU	Clusterin;Isoform 2 of Clusterin;Isoform 4 of Clusterin;Isoform 5 of Clusterin	CLUS_HUMAN	1	38.6569	1.38657	Dengue	QC	NaN	NaN	NaN	121.235	0.111818
Dengue / QC	_KEDSC[Carbamidomethyl (C)]QLGYSAGPC[Carbamidomethyl (C)]M[Oxidation (M)]GMTSR_	P02760	1.0381	1.0381	1.35166e-06	2.41464e-06	22	P02760	AMBP	Protein AMBP	AMBP_HUMAN	1	105.352	2.05352	Dengue	QC	NaN	NaN	NaN	15.1458	0.182924
Dengue / QC	_HQGVM[Oxidation (M)]VGMGQK_	P60709	0.994101	0.994101	1.36348e-06	2.43498e-06	38	P60709	ACTB	Actin, cytoplasmic 1	ACTB_HUMAN	1	99.1839	1.99184	Dengue	QC	NaN	NaN	NaN	28.2893	0.152812
Dengue / QC	_C[Carbamidomethyl (C)]PLLVDSEGWVK_	P01833	2.26152	2.26152	1.3746e-06	2.45248e-06	26	P01833	PIGR	Polymeric immunoglobulin receptor	PIGR_HUMAN	1	379.498	4.79498	Dengue	QC	NaN	NaN	NaN	17.3115	0.365882
Dengue / QC	_GIVEEC[Carbamidomethyl (C)]C[Carbamidomethyl (C)]FR_	P01344;P01344-3	0.315494	0.315494	1.38526e-06	2.47071e-06	162	P01344;P01344-3	IGF2	Insulin-like growth factor II;Isoform 3 of Insulin-like growth factor II	IGF2_HUMAN	1	24.4438	1.24444	Dengue	QC	NaN	NaN	NaN	115.321	0.0628512
Dengue / QC	_ETYGEM[Oxidation (M)]ADC[Carbamidomethyl (C)]C[Carbamidomethyl (C)]AKQEPER_	P02768	0.712669	0.712669	1.39209e-06	2.48132e-06	108	P02768	ALB	Serum albumin	ALBU_HUMAN	1	63.8833	1.63883	Dengue	QC	NaN	NaN	NaN	81.6648	0.125908
Dengue / QC	_INSDGSSTSYADSVK[Dimethyl (KR)]_	A0A0B4J1X5	2.19051	2.19051	1.41887e-06	2.52423e-06	14	A0A0B4J1X5	IGHV3-74	Immunoglobulin heavy variable 3-74	HV374_HUMAN	1	356.468	4.56468	Dengue	QC	NaN	NaN	NaN	8.93634	0.185368
Dengue / QC	_IRITDNMFC[Carbamidomethyl (C)]AGYKPDEGK_	P00734	0.731472	0.731472	1.45443e-06	2.58177e-06	90	P00734	F2	Prothrombin	THRB_HUMAN	1	66.0332	1.66033	Dengue	QC	NaN	NaN	NaN	78.8127	0.131439
Dengue / QC	_S[Acetyl (Protein N-term)]DKPDM[Oxidation (M)]AEIEKFDK_	P62328	2.6746	2.6746	1.46972e-06	2.60725e-06	30	P62328	TMSB4X	Thymosin beta-4	TYB4_HUMAN	1	538.459	6.38459	Dengue	QC	NaN	NaN	NaN	20.4283	0.397398
Dengue / QC	_DVMQGTDEHVVC[Carbamidomethyl (C)]K_	P01871	-0.298286	0.298286	1.47956e-06	2.62139e-06	150	P01871	IGHM	Immunoglobulin heavy constant mu	IGHM_HUMAN	1	-18.6782	0.813218	Dengue	QC	NaN	NaN	NaN	93.3308	0.0756501
Dengue / QC	_GLEWLGR_	A0A0B4J1U7	-0.584315	0.584315	1.48788e-06	2.63447e-06	174	A0A0B4J1U7	IGHV6-1	Immunoglobulin heavy variable 6-1	HV601_HUMAN	1	-33.3034	0.666966	Dengue	QC	NaN	NaN	NaN	49.9016	0.111575
Dengue / QC	_MVETTAYALLTSLNLK_	P01031	0.704704	0.704704	1.48939e-06	2.6363e-06	90	P01031	C5	Complement C5	CO5_HUMAN	1	62.9811	1.62981	Dengue	QC	NaN	NaN	NaN	54.1408	0.161293
Dengue / QC	_SFYFPMSIDKK_	P05160	1.25203	1.25203	1.50895e-06	2.66672e-06	34	P05160	F13B	Coagulation factor XIII B chain	F13B_HUMAN	1	138.177	2.38177	Dengue	QC	NaN	NaN	NaN	14.0716	0.123547
Dengue / QC	_DMALTAFVLISLQEAKDIC[Carbamidomethyl (C)]EEQVNSLPGSITK_	P01024	1.12876	1.12876	1.54224e-06	2.72126e-06	70	P01024	C3	Complement C3	CO3_HUMAN	1	118.671	2.18671	Dengue	QC	NaN	NaN	NaN	10.4602	0.165182
Dengue / QC	_GADVWFK_	P05109	1.8814	1.8814	1.55972e-06	2.75017e-06	40	P05109	S100A8	Protein S100-A8	S10A8_HUMAN	1	268.434	3.68434	Dengue	QC	NaN	NaN	NaN	19.222	0.253134
Dengue / QC	_WYLFGMGNEVDVHAAFFHGQALTNK_	P00450	2.70979	2.70979	1.61415e-06	2.83832e-06	24	P00450	CP	Ceruloplasmin	CERU_HUMAN	1	554.228	6.54228	Dengue	QC	NaN	NaN	NaN	6.85329	0.13409
Dengue / QC	_FQVDNNNRLLLQQVSLPELPGEYSMK_	P01023	1.62447	1.62447	1.62164e-06	2.85058e-06	150	P01023	A2M	Alpha-2-macroglobulin	A2MG_HUMAN	1	208.328	3.08328	Dengue	QC	NaN	NaN	NaN	94.4124	0.198976
Dengue / QC	_NKPGVYTDVAYYLAWIREHTVS_	P00748	1.31838	1.31838	1.62462e-06	2.85493e-06	88	P00748	F12	Coagulation factor XII	FA12_HUMAN	1	149.386	2.49386	Dengue	QC	NaN	NaN	NaN	67.6427	0.235988
Dengue / QC	_MATTM[Oxidation (M)]IQSK_	P19823	0.777582	0.777582	1.63008e-06	2.86273e-06	80	P19823	ITIH2	Inter-alpha-trypsin inhibitor heavy chain H2	ITIH2_HUMAN	1	71.4255	1.71426	Dengue	QC	NaN	NaN	NaN	55.8331	0.149653
Dengue / QC	_AAMVGMLANFLGFR_	P01019	1.00851	1.00851	1.63339e-06	2.86765e-06	56	P01019	AGT	Angiotensinogen	ANGT_HUMAN	1	101.184	2.01184	Dengue	QC	NaN	NaN	NaN	34.1855	0.178547
Dengue / QC	_FFSASC[Carbamidomethyl (C)]VPGADKGQFPNLC[Carbamidomethyl (C)]R_	E7ER44;P02788	1.40596	1.40596	1.65997e-06	2.91248e-06	42	E7ER44;P02788	LTF	Lactotransferrin	E7ER44_HUMAN;TRFL_HUMAN	1	164.993	2.64993	Dengue	QC	NaN	NaN	NaN	25.4746	0.239392
Dengue / QC	_GLEWVGR_	A0A0B4J1Y9	-0.328458	0.328458	1.68752e-06	2.95805e-06	176	A0A0B4J1Y9	IGHV3-72	Immunoglobulin heavy variable 3-72	HV372_HUMAN	1	-20.3613	0.796387	Dengue	QC	NaN	NaN	NaN	82.5766	0.0675094
Dengue / QC	_KGETFSC[Carbamidomethyl (C)]MVGHEALPLAFTQK_	A0A286YEY5;P01877	0.882878	0.882878	1.69947e-06	2.97806e-06	108	A0A286YEY5;P01877	IGHA2	Immunoglobulin heavy constant alpha 2 (Fragment);Immunoglobulin heavy constant alpha 2	A0A286YEY5_HUMAN;IGHA2_HUMAN	1	84.405	1.84405	Dengue	QC	NaN	NaN	NaN	73.2179	0.188687
Dengue / QC	_SDVM[Oxidation (M)]YTDWKKDK_	P19652	2.14856	2.14856	1.71375e-06	3.00213e-06	28	P19652	ORM2	Alpha-1-acid glycoprotein 2	A1AG2_HUMAN	1	343.385	4.43385	Dengue	QC	NaN	NaN	NaN	16.7367	0.39435
Dengue / QC	_IALGGLLFPASNLRLPLVPALDGC[Carbamidomethyl (C)]LRR_	I3L145;P04278	0.883569	0.883569	1.74409e-06	3.05243e-06	74	I3L145;P04278	SHBG	Sex hormone-binding globulin	I3L145_HUMAN;SHBG_HUMAN	1	84.4934	1.84493	Dengue	QC	NaN	NaN	NaN	53.5811	0.219941
Dengue / QC	_LVFQQFDLEPSEGC[Carbamidomethyl (C)]FYDYVK_	B4DPQ0	0.729844	0.729844	1.75921e-06	3.07505e-06	112	B4DPQ0	C1R	Complement C1r subcomponent	B4DPQ0_HUMAN	1	65.846	1.65846	Dengue	QC	NaN	NaN	NaN	97.3008	0.151237
Dengue / QC	_DVRDYFMPC[Carbamidomethyl (C)]PGRGHGHR_	P02790	1.06949	1.06949	1.7916e-06	3.12581e-06	150	P02790	HPX	Hemopexin	HEMO_HUMAN	1	109.869	2.09869	Dengue	QC	NaN	NaN	NaN	137.904	0.18173
Dengue / QC	_LLIYDASSR[Methyl (KR)]_	A0A0C4DH25	-0.540028	0.540028	1.82419e-06	3.17872e-06	176	A0A0C4DH25	IGKV3D-20	Immunoglobulin kappa variable 3D-20	KVD20_HUMAN	1	-31.2242	0.687758	Dengue	QC	NaN	NaN	NaN	58.693	0.0981068
Dengue / QC	_YFKPGMPFDLM[Oxidation (M)]VFVTNPDGSPAYR_	P01024	0.547471	0.547471	1.85787e-06	3.22837e-06	64	P01024	C3	Complement C3	CO3_HUMAN	1	46.1521	1.46152	Dengue	QC	NaN	NaN	NaN	16.3911	0.222224
Dengue / QC	_GGASEHITTLAYQELPTADLM[Oxidation (M)]QEWGDAVQYNPAIIK_	P07358	0.426158	0.426158	1.86483e-06	3.23947e-06	44	P07358	C8B	Complement component C8 beta chain	CO8B_HUMAN	1	34.3651	1.34365	Dengue	QC	NaN	NaN	NaN	16.5424	0.70065
Dengue / QC	_DPTPEQTHR_	P08697	0.490084	0.490084	1.88405e-06	3.27083e-06	84	P08697	SERPINF2	Alpha-2-antiplasmin	A2AP_HUMAN	1	40.4526	1.40453	Dengue	QC	NaN	NaN	NaN	55.0479	0.121045
Dengue / QC	_YDVENC[Carbamidomethyl (C)]LANK_	P01023	-0.389717	0.389717	1.89504e-06	3.28888e-06	170	P01023	A2M	Alpha-2-macroglobulin	A2MG_HUMAN	1	-23.672	0.76328	Dengue	QC	NaN	NaN	NaN	128.703	0.0764247
Dengue / QC	_ALANSLAC[Carbamidomethyl (C)]QGK_	J3KPS3;P04075	2.51711	2.51711	1.90181e-06	3.29961e-06	20	J3KPS3;P04075	ALDOA	Fructose-bisphosphate aldolase;Fructose-bisphosphate aldolase A	J3KPS3_HUMAN;ALDOA_HUMAN	1	472.433	5.72433	Dengue	QC	NaN	NaN	NaN	13.4396	0.296643
Dengue / QC	_IDITLSSVK_	Q08380	1.06428	1.06428	1.93892e-06	3.35672e-06	54	Q08380	LGALS3BP	Galectin-3-binding protein	LG3BP_HUMAN	1	109.113	2.09113	Dengue	QC	NaN	NaN	NaN	33.777	0.199377
Dengue / QC	_WC[Carbamidomethyl (C)]AVSEHEATKC[Carbamidomethyl (C)]QSFR_	P02787	1.91794	1.91794	1.95045e-06	3.37459e-06	114	P02787	TF	Serotransferrin	TRFE_HUMAN	1	277.883	3.77883	Dengue	QC	NaN	NaN	NaN	95.8863	0.330362
Dengue / QC	_TFVNITPAEVGVLVGK_	P07737	1.20355	1.20355	1.96025e-06	3.38842e-06	34	P07737	PFN1	Profilin-1	PROF1_HUMAN	1	130.305	2.30305	Dengue	QC	NaN	NaN	NaN	16.1626	0.215151
Dengue / QC	_YNPVVIDFEMQPIHEVLR_	P07357	0.347247	0.347247	1.98448e-06	3.42608e-06	162	P07357	C8A	Complement component C8 alpha chain	CO8A_HUMAN	1	27.213	1.27213	Dengue	QC	NaN	NaN	NaN	101.833	0.0859741
Dengue / QC	_YHFEALADTGISSEFYDNANDLLSK_	P07357	0.868861	0.868861	2.00031e-06	3.45128e-06	106	P07357	C8A	Complement component C8 alpha chain	CO8A_HUMAN	1	82.6221	1.82622	Dengue	QC	NaN	NaN	NaN	49.5897	0.13889
Dengue / QC	_ELNQAGQETLVTGWGYHSSR_	E7END6;P04070;P04070-2	0.349459	0.349459	2.00426e-06	3.45597e-06	128	E7END6;P04070;P04070-2	PROC	Vitamin K-dependent protein C;Vitamin K-dependent protein C;Isoform 2 of Vitamin K-dependent protein C	E7END6_HUMAN;PROC_HUMAN;PROC_HUMAN	1	27.4083	1.27408	Dengue	QC	NaN	NaN	NaN	74.1998	0.0605159
Dengue / QC	_LLDLVFLLDGSSR_	P04275	1.0627	1.0627	2.0982e-06	3.60795e-06	30	P04275	VWF	von Willebrand factor	VWF_HUMAN	1	108.883	2.08883	Dengue	QC	NaN	NaN	NaN	18.508	0.138544
Dengue / QC	_NWGLSVYADKPETTKEQLGEFYEALDC[Carbamidomethyl (C)]LR_	P02763	1.47385	1.47385	2.11455e-06	3.63495e-06	126	P02763	ORM1	Alpha-1-acid glycoprotein 1	A1AG1_HUMAN	1	177.762	2.77762	Dengue	QC	NaN	NaN	NaN	88.9796	0.194691
Dengue / QC	_EQPGVYTK_	H0YAC1;P03952	0.336947	0.336947	2.13438e-06	3.66342e-06	88	H0YAC1;P03952	KLKB1	Plasma kallikrein (Fragment);Plasma kallikrein	H0YAC1_HUMAN;KLKB1_HUMAN	1	26.3081	1.26308	Dengue	QC	NaN	NaN	NaN	58.7838	0.0793513
Dengue / QC	_DFALLSLQVPLKDAK_	P0C0L5	0.303149	0.303149	2.1435e-06	3.67681e-06	172	P0C0L5	C4B	Complement C4-B	CO4B_HUMAN	1	23.3835	1.23383	Dengue	QC	NaN	NaN	NaN	136.339	0.0812746
Dengue / QC	_AWGESTPLANKPGK_	A0A0A0MRJ7;P12259	0.516357	0.516357	2.15177e-06	3.68988e-06	90	A0A0A0MRJ7;P12259	F5	Coagulation factor V	A0A0A0MRJ7_HUMAN;FA5_HUMAN	1	43.0338	1.43034	Dengue	QC	NaN	NaN	NaN	51.8437	0.116996
Dengue / QC	_SLEDLQLTHNKITK_	P51884	0.552071	0.552071	2.16184e-06	3.70601e-06	112	P51884	LUM	Lumican	LUM_HUMAN	1	46.6189	1.46619	Dengue	QC	NaN	NaN	NaN	79.7732	0.109741
Dengue / QC	_C[Carbamidomethyl (C)]QSFRDHMK_	P02787	1.01504	1.01504	2.17916e-06	3.73e-06	156	P02787	TF	Serotransferrin	TRFE_HUMAN	1	102.096	2.02096	Dengue	QC	NaN	NaN	NaN	147.63	0.176772
Dengue / QC	_TAC[Carbamidomethyl (C)]GDC[Carbamidomethyl (C)]TSGSSEC[Carbamidomethyl (C)]MWC[Carbamidomethyl (C)]SNMK_	O75882;O75882-2;O75882-3	0.759045	0.759045	2.18199e-06	3.73371e-06	80	O75882;O75882-2;O75882-3	ATRN	Attractin;Isoform 2 of Attractin;Isoform 3 of Attractin	ATRN_HUMAN	1	69.2369	1.69237	Dengue	QC	NaN	NaN	NaN	52.7638	0.164642
Dengue / QC	_AGFSWIEVTFKNPLVWVHASPEHVVVTR_	Q14624	0.707976	0.707976	2.19641e-06	3.75609e-06	154	Q14624	ITIH4	Inter-alpha-trypsin inhibitor heavy chain H4	ITIH4_HUMAN	1	63.3511	1.63351	Dengue	QC	NaN	NaN	NaN	95.2839	0.134416
Dengue / QC	_QGETLNFLEIGYSR_	Q16610	0.938142	0.938142	2.23473e-06	3.82045e-06	96	Q16610	ECM1	Extracellular matrix protein 1	ECM1_HUMAN	1	91.6059	1.91606	Dengue	QC	NaN	NaN	NaN	61.4582	0.178026
Dengue / QC	_SIYGEKFEDENFILK_	P62937	1.8445	1.8445	2.31443e-06	3.95429e-06	18	P62937	PPIA	Peptidyl-prolyl cis-trans isomerase A	PPIA_HUMAN	1	259.128	3.59128	Dengue	QC	NaN	NaN	NaN	8.20694	0.123965
Dengue / QC	_AFIQLWAFDAVKGK_	P02760	1.60949	1.60949	2.34487e-06	3.99777e-06	130	P02760	AMBP	Protein AMBP	AMBP_HUMAN	1	205.144	3.05144	Dengue	QC	NaN	NaN	NaN	103.346	0.213053
Dengue / QC	_SVMAPFTMTIDAHTNGNGK_	P04114	0.866345	0.866345	2.35813e-06	4.01793e-06	16	P04114	APOB	Apolipoprotein B-100	APOB_HUMAN	1	82.3039	1.82304	Dengue	QC	NaN	NaN	NaN	10.8502	0.10443
Dengue / QC	_VQSTELC[Carbamidomethyl (C)]AGHLAGGTDSC[Carbamidomethyl (C)]QGDSGGPLVC[Carbamidomethyl (C)]FEKDK_	P00747	0.263991	0.263991	2.38456e-06	4.0568e-06	118	P00747	PLG	Plasminogen	PLMN_HUMAN	1	20.0796	1.2008	Dengue	QC	NaN	NaN	NaN	69.1279	0.0550919
Dengue / QC	_EEMTKNQVSLTC[Carbamidomethyl (C)]LVK_	P01860	0.740723	0.740723	2.38787e-06	4.06118e-06	172	P01860	IGHG3	Immunoglobulin heavy constant gamma 3	IGHG3_HUMAN	1	67.1013	1.67101	Dengue	QC	NaN	NaN	NaN	154.936	0.133385
Dengue / QC	_AKM[Oxidation (M)]GNFPWQVFTNIHGR_	B4DPQ0	0.0144427	0.0144427	2.46748e-06	4.18896e-06	28	B4DPQ0	C1R	Complement C1r subcomponent	B4DPQ0_HUMAN	1	1.00612	1.01006	Dengue	QC	NaN	NaN	NaN	11.1798	0.647684
Dengue / QC	_VSNR[Methyl (KR)]DSGVPDRFSGSGSGTDFTLK_	P06310	1.16283	1.16283	2.47102e-06	4.19371e-06	22	P06310	IGKV2-30	Immunoglobulin kappa variable 2-30	KV230_HUMAN	1	123.896	2.23896	Dengue	QC	NaN	NaN	NaN	16.8387	0.203284
Dengue / QC	_QFTSSTSYNRGDSTFESK_	P02671	1.75785	1.75785	2.48547e-06	4.21567e-06	170	P02671	FGA	Fibrinogen alpha chain	FIBA_HUMAN	1	238.193	3.38193	Dengue	QC	NaN	NaN	NaN	149.002	0.314742
Dengue / QC	_DIYKGVDMR_	H0YAC1;P03952	0.294233	0.294233	2.51178e-06	4.25772e-06	130	H0YAC1;P03952	KLKB1	Plasma kallikrein (Fragment);Plasma kallikrein	H0YAC1_HUMAN;KLKB1_HUMAN	1	22.6233	1.22623	Dengue	QC	NaN	NaN	NaN	47.4935	0.0995636
Dengue / QC	_EEQFNSTYR_	P01861	1.27099	1.27099	2.52642e-06	4.27889e-06	24	P01861	IGHG4	Immunoglobulin heavy constant gamma 4	IGHG4_HUMAN	1	141.327	2.41327	Dengue	QC	NaN	NaN	NaN	19.0838	0.238929
Dengue / QC	_EGMLSIMSYR_	P01031	0.136237	0.136237	2.55124e-06	4.31416e-06	116	P01031	C5	Complement C5	CO5_HUMAN	1	9.90344	1.09903	Dengue	QC	NaN	NaN	NaN	94.823	0.0713833
Dengue / QC	_TPC[Carbamidomethyl (C)]TVSC[Carbamidomethyl (C)]NIPVVSGKEC[Carbamidomethyl (C)]EEIIR_	P02675	1.77829	1.77829	2.61963e-06	4.42181e-06	110	P02675	FGB	Fibrinogen beta chain	FIBB_HUMAN	1	243.019	3.43019	Dengue	QC	NaN	NaN	NaN	101.67	0.338524
Dengue / QC	_EKAEAQAQYSAAVAK_	Q14624	-0.665294	0.665294	2.6407e-06	4.45468e-06	174	Q14624	ITIH4	Inter-alpha-trypsin inhibitor heavy chain H4	ITIH4_HUMAN	1	-36.944	0.63056	Dengue	QC	NaN	NaN	NaN	42.6761	0.13563
Dengue / QC	_M[Oxidation (M)]NFRPGVLSSR_	Q14624	3.1883	3.1883	2.64736e-06	4.46323e-06	78	Q14624	ITIH4	Inter-alpha-trypsin inhibitor heavy chain H4	ITIH4_HUMAN	1	811.537	9.11537	Dengue	QC	NaN	NaN	NaN	39.9932	0.272241
Dengue / QC	_AFWLDVSHNRLEALPNSLLAPLGR_	P35858;P35858-2	1.38544	1.38544	2.67887e-06	4.50823e-06	30	P35858;P35858-2	IGFALS	Insulin-like growth factor-binding protein complex acid labile subunit;Isoform 2 of Insulin-like growth factor-binding protein complex acid labile subunit	ALS_HUMAN	1	161.252	2.61252	Dengue	QC	NaN	NaN	NaN	17.687	0.157918
Dengue / QC	_FSGVPDRFSGSGSGTDFTLK_	A0A075B6S2;A2NJV5	0.512016	0.512016	2.68207e-06	4.5109e-06	154	A0A075B6S2;A2NJV5	IGKV2D-29;IGKV2-29	Immunoglobulin kappa variable 2D-29;Immunoglobulin kappa variable 2-29	KVD29_HUMAN;KV229_HUMAN	1	42.6041	1.42604	Dengue	QC	NaN	NaN	NaN	134.675	0.113545
Dengue / QC	_VETNMAFSPFSIASLLTQVLLGAGENTK_	P05155;P05155-3	0.64541	0.64541	2.7348e-06	4.59545e-06	96	P05155;P05155-3	SERPING1	Plasma protease C1 inhibitor;Isoform 3 of Plasma protease C1 inhibitor	IC1_HUMAN	1	56.4184	1.56418	Dengue	QC	NaN	NaN	NaN	39.9525	0.182724
Dengue / QC	_VSTQNLLLLLTDNEAWNGFVAAAELPR_	O14791;O14791-2	0.729298	0.729298	2.74806e-06	4.61635e-06	80	O14791;O14791-2	APOL1	Apolipoprotein L1;Isoform 2 of Apolipoprotein L1	APOL1_HUMAN	1	65.7832	1.65783	Dengue	QC	NaN	NaN	NaN	16.478	0.110626
Dengue / QC	_NTFAEVTGLSPGVTYYFK_	P02751;P02751-15;P02751-3;P02751-7	0.40749	0.40749	2.76568e-06	4.64379e-06	158	P02751;P02751-15;P02751-3;P02751-7	FN1	Fibronectin;Isoform 15 of Fibronectin;Isoform 3 of Fibronectin;Isoform 7 of Fibronectin	FINC_HUMAN	1	32.6376	1.32638	Dengue	QC	NaN	NaN	NaN	126.594	0.0954818
Dengue / QC	_YASQSFSGVPSR_	A0A0C4DH24	-0.674651	0.674651	2.77684e-06	4.65911e-06	138	A0A0C4DH24	IGKV6-21	Immunoglobulin kappa variable 6-21	KV621_HUMAN	1	-37.3516	0.626484	Dengue	QC	NaN	NaN	NaN	105.322	0.130359
Dengue / QC	_LLC[Carbamidomethyl (C)]QC[Carbamidomethyl (C)]LGFGSGHFR_	P02751;P02751-15;P02751-3;P02751-7	0.436324	0.436324	2.79482e-06	4.68474e-06	120	P02751;P02751-15;P02751-3;P02751-7	FN1	Fibronectin;Isoform 15 of Fibronectin;Isoform 3 of Fibronectin;Isoform 7 of Fibronectin	FINC_HUMAN	1	35.3152	1.35315	Dengue	QC	NaN	NaN	NaN	105.848	0.0894073
Dengue / QC	_RDTANLFPQTSLTLHMWPDTEGTFNVEC[Carbamidomethyl (C)]LTTDHYTGGMK_	P00450	0.64604	0.64604	2.84185e-06	4.75679e-06	166	P00450	CP	Ceruloplasmin	CERU_HUMAN	1	56.4867	1.56487	Dengue	QC	NaN	NaN	NaN	110.766	0.113501
Dengue / QC	_GQWGTVC[Carbamidomethyl (C)]DNLWDLTDASVVC[Carbamidomethyl (C)]R_	Q08380	0.878487	0.878487	2.87346e-06	4.80682e-06	116	Q08380	LGALS3BP	Galectin-3-binding protein	LG3BP_HUMAN	1	83.8446	1.83845	Dengue	QC	NaN	NaN	NaN	88.75	0.162124
Dengue / QC	_QEELC[Carbamidomethyl (C)]LAR_	P02753;Q5VY30	0.542315	0.542315	2.95377e-06	4.92774e-06	158	P02753;Q5VY30	RBP4	Retinol-binding protein 4;Retinol binding protein 4, plasma, isoform CRA_b	RET4_HUMAN;Q5VY30_HUMAN	1	45.6307	1.45631	Dengue	QC	NaN	NaN	NaN	78.4921	0.0942466
Dengue / QC	_FDHVITNMNNNYEPR_	D6R934;P02746	-0.401093	0.401093	2.95759e-06	4.93134e-06	176	D6R934;P02746	C1QB	Complement C1q subcomponent subunit B	D6R934_HUMAN;C1QB_HUMAN	1	-24.2716	0.757284	Dengue	QC	NaN	NaN	NaN	41.2463	0.0871798
Dengue / QC	_VDNALQSGNSQESVTEQDSK_	P01834	-0.393056	0.393056	2.97373e-06	4.95533e-06	176	P01834	IGKC	Immunoglobulin kappa constant	IGKC_HUMAN	1	-23.8485	0.761515	Dengue	QC	NaN	NaN	NaN	69.8865	0.08262
Dengue / QC	_NWETEITAQPDGGKTENC[Carbamidomethyl (C)]AVLSGAANGK_	E9PHK0;P05452	0.411009	0.411009	2.97808e-06	4.95962e-06	94	E9PHK0;P05452	CLEC3B	Tetranectin	E9PHK0_HUMAN;TETN_HUMAN	1	32.9615	1.32962	Dengue	QC	NaN	NaN	NaN	71.0128	0.0767861
Dengue / QC	_GDEC[Carbamidomethyl (C)]QLC[Carbamidomethyl (C)]EVENR_	O75882;O75882-2;O75882-3	0.413298	0.413298	2.99189e-06	4.97966e-06	96	O75882;O75882-2;O75882-3	ATRN	Attractin;Isoform 2 of Attractin;Isoform 3 of Attractin	ATRN_HUMAN	1	33.1727	1.33173	Dengue	QC	NaN	NaN	NaN	21.9026	0.108734
Dengue / QC	_LGPHAGDVEGHLSFLEK_	P06727	3.86826	3.86826	2.99484e-06	4.98311e-06	16	P06727	APOA4	Apolipoprotein A-IV	APOA4_HUMAN	1	1360.36	14.6036	Dengue	QC	NaN	NaN	NaN	10.1772	0.318906
Dengue / QC	_ALDLINK_	P04196	-0.589512	0.589512	3.039e-06	5.05357e-06	154	P04196	HRG	Histidine-rich glycoprotein	HRG_HUMAN	1	-33.5432	0.664568	Dengue	QC	NaN	NaN	NaN	34.9656	0.109914
Dengue / QC	_SLTLGIEPVSPTSLR_	Q6EMK4	0.363967	0.363967	3.04234e-06	5.05613e-06	130	Q6EMK4	VASN	Vasorin	VASN_HUMAN	1	28.6959	1.28696	Dengue	QC	NaN	NaN	NaN	109.028	0.0942777
Dengue / QC	_DFYVDENTTVR_	P29622	0.795181	0.795181	3.17491e-06	5.25153e-06	42	P29622	SERPINA4	Kallistatin	KAIN_HUMAN	1	73.5295	1.73529	Dengue	QC	NaN	NaN	NaN	21.887	0.104318
Dengue / QC	_ADDK[Methyl (KR)]ETC[Carbamidomethyl (C)]FAEEGKK_	P02768	-0.266593	0.266593	3.17705e-06	5.25353e-06	152	P02768	ALB	Serum albumin	ALBU_HUMAN	1	-16.8719	0.831281	Dengue	QC	NaN	NaN	NaN	68.6784	0.397701
Dengue / QC	_TPEYYPNAGLIMNYC[Carbamidomethyl (C)]R_	P08519	0.571171	0.571171	3.1817e-06	5.25966e-06	166	P08519	LPA	Apolipoprotein(a)	APOA_HUMAN	1	48.5729	1.48573	Dengue	QC	NaN	NaN	NaN	124.756	0.103458
Dengue / QC	_SC[Carbamidomethyl (C)]HLAMAPNHAVVSR_	E7ER44;P02788	1.70938	1.70938	3.20125e-06	5.28521e-06	24	E7ER44;P02788	LTF	Lactotransferrin	E7ER44_HUMAN;TRFL_HUMAN	1	227.02	3.2702	Dengue	QC	NaN	NaN	NaN	18.1895	0.271292
Dengue / QC	_HQPQEFPTYVEPTNDEIC[Carbamidomethyl (C)]EAFRKDPK_	P02774;P02774-3	0.406274	0.406274	3.222e-06	5.31373e-06	176	P02774;P02774-3	GC	Vitamin D-binding protein;Isoform 3 of Vitamin D-binding protein	VTDB_HUMAN	1	32.5259	1.32526	Dengue	QC	NaN	NaN	NaN	149.445	0.092105
Dengue / QC	_GFGSLNDEGEGEFWLGNDYLHLLTQR_	P02671	1.67589	1.67589	3.22501e-06	5.31714e-06	22	P02671	FGA	Fibrinogen alpha chain	FIBA_HUMAN	1	219.517	3.19517	Dengue	QC	NaN	NaN	NaN	16.2808	0.225967
Dengue / QC	_SRLSNLIK_	P02774;P02774-3	0.837003	0.837003	3.23226e-06	5.32597e-06	118	P02774;P02774-3	GC	Vitamin D-binding protein;Isoform 3 of Vitamin D-binding protein	VTDB_HUMAN	1	78.6336	1.78634	Dengue	QC	NaN	NaN	NaN	80.336	0.146606
Dengue / QC	_IIAPPERK_	P60709	2.13742	2.13742	3.26052e-06	5.36779e-06	34	P60709	ACTB	Actin, cytoplasmic 1	ACTB_HUMAN	1	339.975	4.39975	Dengue	QC	NaN	NaN	NaN	27.661	0.415955
Dengue / QC	_DMYSFLEDM[Oxidation (M)]GLK_	P01023	0.74204	0.74204	3.33821e-06	5.4844e-06	58	P01023	A2M	Alpha-2-macroglobulin	A2MG_HUMAN	1	67.254	1.67254	Dengue	QC	NaN	NaN	NaN	41.8842	0.126249
Dengue / QC	_M[Oxidation (M)]LADAPPQDPSC[Carbamidomethyl (C)]C[Carbamidomethyl (C)]SGALYYGSK_	P19823	1.31153	1.31153	3.3436e-06	5.49166e-06	66	P19823	ITIH2	Inter-alpha-trypsin inhibitor heavy chain H2	ITIH2_HUMAN	1	148.205	2.48205	Dengue	QC	NaN	NaN	NaN	45.7535	0.270447
Dengue / QC	_KLYDYC[Carbamidomethyl (C)]DVPQC[Carbamidomethyl (C)]AAPSFDC[Carbamidomethyl (C)]GKPQVEPK_	P00747	0.401534	0.401534	3.35775e-06	5.51167e-06	176	P00747	PLG	Plasminogen	PLMN_HUMAN	1	32.0911	1.32091	Dengue	QC	NaN	NaN	NaN	147.778	0.0720227
Dengue / QC	_C[Carbamidomethyl (C)]EDGKWTEPPKC[Carbamidomethyl (C)]IEGQEK_	P05160	0.462015	0.462015	3.39531e-06	5.56192e-06	74	P05160	F13B	Coagulation factor XIII B chain	F13B_HUMAN	1	37.7464	1.37746	Dengue	QC	NaN	NaN	NaN	39.1676	0.101076
Dengue / QC	_TENC[Carbamidomethyl (C)]AVLSGAANGK_	E9PHK0;P05452	1.04981	1.04981	3.43175e-06	5.61997e-06	26	E9PHK0;P05452	CLEC3B	Tetranectin	E9PHK0_HUMAN;TETN_HUMAN	1	107.026	2.07026	Dengue	QC	NaN	NaN	NaN	15.6988	0.246046
Dengue / QC	_GM[Oxidation (M)]TNINDGLLR_	Q06033;Q06033-2	1.62808	1.62808	3.49577e-06	5.72147e-06	18	Q06033;Q06033-2	ITIH3	Inter-alpha-trypsin inhibitor heavy chain H3;Isoform 2 of Inter-alpha-trypsin inhibitor heavy chain H3	ITIH3_HUMAN	1	209.102	3.09102	Dengue	QC	NaN	NaN	NaN	9.61524	0.262089
Dengue / QC	_LLLFSPSVVHLGVPLSVGVQLQDVPRGQVVK_	P0C0L5	1.57027	1.57027	3.51758e-06	5.75547e-06	56	P0C0L5	C4B	Complement C4-B	CO4B_HUMAN	1	196.961	2.96961	Dengue	QC	NaN	NaN	NaN	39.4936	0.235647
Dengue / QC	_TPFVTHPGYDTGNGIQLPGTSGQQPSVGQQMIFEEHGFRR_	P02751;P02751-15;P02751-3;P02751-7	0.558932	0.558932	3.57211e-06	5.83108e-06	140	P02751;P02751-15;P02751-3;P02751-7	FN1	Fibronectin;Isoform 15 of Fibronectin;Isoform 3 of Fibronectin;Isoform 7 of Fibronectin	FINC_HUMAN	1	47.3178	1.47318	Dengue	QC	NaN	NaN	NaN	125.011	0.102622
Dengue / QC	_MYLGYEYVTAIRNLR_	P02787	2.18221	2.18221	3.6353e-06	5.92561e-06	58	P02787	TF	Serotransferrin	TRFE_HUMAN	1	353.849	4.53849	Dengue	QC	NaN	NaN	NaN	42.1214	0.265707
Dengue / QC	_ENQLEVLEVSWLHGLK_	P02750	0.454614	0.454614	3.64731e-06	5.94346e-06	142	P02750	LRG1	Leucine-rich alpha-2-glycoprotein	A2GL_HUMAN	1	37.0416	1.37042	Dengue	QC	NaN	NaN	NaN	105.28	0.117772
Dengue / QC	_YFKPGMPFDLMVFVTNPDGSPAYRVPVAVQGEDTVQSLTQGDGVAK_	P01024	0.563702	0.563702	3.68175e-06	5.99608e-06	172	P01024	C3	Complement C3	CO3_HUMAN	1	47.8057	1.47806	Dengue	QC	NaN	NaN	NaN	70.3627	0.0917027
Dengue / QC	_RIFSPFADLSELSATGR_	G3V2W1;Q9UK55	0.654149	0.654149	3.68464e-06	5.99904e-06	44	G3V2W1;Q9UK55	SERPINA10	Protein Z-dependent protease inhibitor	G3V2W1_HUMAN;ZPI_HUMAN	1	57.3687	1.57369	Dengue	QC	NaN	NaN	NaN	20.3866	0.110862
Dengue / QC	_VFEAMNSYDLGC[Carbamidomethyl (C)]GPGGGDSALQVFQAAGLAFSDGDQWTLSR_	P0C0L5	1.24089	1.24089	3.6858e-06	5.99919e-06	126	P0C0L5	C4B	Complement C4-B	CO4B_HUMAN	1	136.344	2.36344	Dengue	QC	NaN	NaN	NaN	14.7058	0.15126
Dengue / QC	_EC[Carbamidomethyl (C)]ELPKIDVHLVPDRK_	P08603	1.79943	1.79943	3.71645e-06	6.04732e-06	18	P08603	CFH	Complement factor H	CFAH_HUMAN	1	248.082	3.48082	Dengue	QC	NaN	NaN	NaN	8.72614	0.255221
Dengue / QC	_SASNMAIVDVK_	P01023	-0.290174	0.290174	3.71969e-06	6.05083e-06	176	P01023	A2M	Alpha-2-macroglobulin	A2MG_HUMAN	1	-18.2197	0.817803	Dengue	QC	NaN	NaN	NaN	106.674	0.0606375
Dengue / QC	_ADQVC[Carbamidomethyl (C)]INLR_	Q12805;Q12805-2;Q12805-4	0.416887	0.416887	3.7619e-06	6.10886e-06	170	Q12805;Q12805-2;Q12805-4	EFEMP1	EGF-containing fibulin-like extracellular matrix protein 1;Isoform 2 of EGF-containing fibulin-like extracellular matrix protein 1;Isoform 4 of EGF-containing fibulin-like extracellular matrix protein 1	FBLN3_HUMAN	1	33.5043	1.33504	Dengue	QC	NaN	NaN	NaN	161.24	0.108041
Dengue / QC	_VDFTLSSERDFALLSLQVPLKDAK_	P0C0L5	0.597361	0.597361	3.76054e-06	6.10886e-06	176	P0C0L5	C4B	Complement C4-B	CO4B_HUMAN	1	51.2946	1.51295	Dengue	QC	NaN	NaN	NaN	106.138	0.10382
Dengue / QC	_EQQC[Carbamidomethyl (C)]VIM[Oxidation (M)]AENR_	P00747	0.519374	0.519374	3.77553e-06	6.12744e-06	102	P00747	PLG	Plasminogen	PLMN_HUMAN	1	43.3333	1.43333	Dengue	QC	NaN	NaN	NaN	88.5401	0.101753
Dengue / QC	_IQALQQQADEAEDRAQGLQR_	P67936	0.892672	0.892672	3.79895e-06	6.16189e-06	56	P67936	TPM4	Tropomyosin alpha-4 chain	TPM4_HUMAN	1	85.6611	1.85661	Dengue	QC	NaN	NaN	NaN	44.073	0.154002
Dengue / QC	_FPETLMEIEIPIVDHSTC[Carbamidomethyl (C)]QK_	P48740	1.25691	1.25691	3.85199e-06	6.23709e-06	20	P48740	MASP1	Mannan-binding lectin serine protease 1	MASP1_HUMAN	1	138.983	2.38983	Dengue	QC	NaN	NaN	NaN	13.7931	0.193305
Dengue / QC	_ATAQMLEVMFK_	P18428	0.499704	0.499704	3.86415e-06	6.25497e-06	122	P18428	LBP	Lipopolysaccharide-binding protein	LBP_HUMAN	1	41.3924	1.41392	Dengue	QC	NaN	NaN	NaN	102.521	0.103508
Dengue / QC	_SC[Carbamidomethyl (C)]GLHQLLRGPEVQLVAHSPWLKDSLSR_	P0C0L5	0.732787	0.732787	3.87741e-06	6.27462e-06	172	P0C0L5	C4B	Complement C4-B	CO4B_HUMAN	1	66.1847	1.66185	Dengue	QC	NaN	NaN	NaN	153.778	0.13485
Dengue / QC	_SLDFNTLVDNISVDPETGDLWVGC[Carbamidomethyl (C)]HPNGMK_	P27169	0.739774	0.739774	3.99034e-06	6.43147e-06	76	P27169	PON1	Serum paraoxonase/arylesterase 1	PON1_HUMAN	1	66.9914	1.66991	Dengue	QC	NaN	NaN	NaN	17.5946	0.120924
Dengue / QC	_AYIFIDEAHITQALIWLSQRQK_	P01023	1.24423	1.24423	3.99771e-06	6.44139e-06	68	P01023	A2M	Alpha-2-macroglobulin	A2MG_HUMAN	1	136.892	2.36892	Dengue	QC	NaN	NaN	NaN	41.9991	0.202779
Dengue / QC	_NNQKSEPLIGR_	P02751;P02751-15;P02751-3;P02751-7	1.16265	1.16265	4.01304e-06	6.46424e-06	46	P02751;P02751-15;P02751-3;P02751-7	FN1	Fibronectin;Isoform 15 of Fibronectin;Isoform 3 of Fibronectin;Isoform 7 of Fibronectin	FINC_HUMAN	1	123.869	2.23869	Dengue	QC	NaN	NaN	NaN	30.5375	0.215597
Dengue / QC	_TFGSGEADC[Carbamidomethyl (C)]GLRPLFEKK_	P00734	0.831712	0.831712	4.0175e-06	6.46769e-06	156	P00734	F2	Prothrombin	THRB_HUMAN	1	77.9796	1.7798	Dengue	QC	NaN	NaN	NaN	122.179	0.12227
Dengue / QC	_FTISRDNAKNSLYLQMNSLR_	P01782	0.0484631	0.0484631	4.01653e-06	6.46769e-06	164	P01782	IGHV3-9	Immunoglobulin heavy variable 3-9	HV309_HUMAN	1	3.41627	1.03416	Dengue	QC	NaN	NaN	NaN	68.2296	0.623226
Dengue / QC	_C[Carbamidomethyl (C)]EELQGQK_	P27918	0.88553	0.88553	4.09854e-06	6.58116e-06	28	P27918	CFP	Properdin	PROP_HUMAN	1	84.7443	1.84744	Dengue	QC	NaN	NaN	NaN	19.019	0.11416
Dengue / QC	_TDASDVKPC[Carbamidomethyl (C)]_	P02749	0.520638	0.520638	4.13566e-06	6.63505e-06	100	P02749	APOH	Beta-2-glycoprotein 1	APOH_HUMAN	1	43.4589	1.43459	Dengue	QC	NaN	NaN	NaN	81.797	0.106969
Dengue / QC	_TQVNTQAEQLRR_	P06727	0.748969	0.748969	4.14985e-06	6.65591e-06	58	P06727	APOA4	Apolipoprotein A-IV	APOA4_HUMAN	1	68.0592	1.68059	Dengue	QC	NaN	NaN	NaN	49.2969	0.147721
Dengue / QC	_LDTLAQEVALLKEQQALQTVC[Carbamidomethyl (C)]LK_	E9PHK0;P05452	0.478356	0.478356	4.21932e-06	6.76153e-06	38	E9PHK0;P05452	CLEC3B	Tetranectin	E9PHK0_HUMAN;TETN_HUMAN	1	39.3155	1.39316	Dengue	QC	NaN	NaN	NaN	21.4004	0.0948141
Dengue / QC	_SC[Carbamidomethyl (C)]DVESNPGIFLPPGTQAEFNLR_	I3L145;P04278	1.01023	1.01023	4.24341e-06	6.79625e-06	70	I3L145;P04278	SHBG	Sex hormone-binding globulin	I3L145_HUMAN;SHBG_HUMAN	1	101.423	2.01423	Dengue	QC	NaN	NaN	NaN	42.853	0.155932
Dengue / QC	_EPAHLMSLFGGKPMIIYKGGTSR_	P06396	0.602929	0.602929	4.29198e-06	6.86448e-06	80	P06396	GSN	Gelsolin	GELS_HUMAN	1	51.8797	1.5188	Dengue	QC	NaN	NaN	NaN	69.4718	0.163407
Dengue / QC	_ELRYDSTC[Carbamidomethyl (C)]ER_	P07357	2.1151	2.1151	4.29838e-06	6.8725e-06	30	P07357	C8A	Complement component C8 alpha chain	CO8A_HUMAN	1	333.22	4.3322	Dengue	QC	NaN	NaN	NaN	23.2236	0.328088
Dengue / QC	_ALRLPPTTTC[Carbamidomethyl (C)]QQQK_	B4E1Z4	0.633108	0.633108	4.34777e-06	6.94751e-06	92	B4E1Z4	NaN	cDNA FLJ55673, highly similar to Complement factor B (EC 3.4.21.47)	B4E1Z4_HUMAN	1	55.0903	1.5509	Dengue	QC	NaN	NaN	NaN	63.4047	0.128732
Dengue / QC	_ALYYDLISSPDIHGTYKELLDTVTAPQK_	P36955	1.07403	1.07403	4.35281e-06	6.95358e-06	144	P36955	SERPINF1	Pigment epithelium-derived factor	PEDF_HUMAN	1	110.53	2.1053	Dengue	QC	NaN	NaN	NaN	82.9127	0.180367
Dengue / QC	_KADGSYAAWLSR_	P0C0L5	-0.385324	0.385324	4.41675e-06	7.05371e-06	174	P0C0L5	C4B	Complement C4-B	CO4B_HUMAN	1	-23.4393	0.765607	Dengue	QC	NaN	NaN	NaN	112.443	0.079602
Dengue / QC	_C[Carbamidomethyl (C)]MADKTLPEC[Carbamidomethyl (C)]SKLPNNVLQEK_	P43652	0.122688	0.122688	4.43962e-06	7.08619e-06	94	P43652	AFM	Afamin	AFAM_HUMAN	1	8.87619	1.08876	Dengue	QC	NaN	NaN	NaN	53.2644	0.278706
Dengue / QC	_GQVVKGSVFLRNPSR_	P0C0L5	0.779268	0.779268	4.45557e-06	7.10963e-06	148	P0C0L5	C4B	Complement C4-B	CO4B_HUMAN	1	71.626	1.71626	Dengue	QC	NaN	NaN	NaN	118.055	0.122534
Dengue / QC	_GEWPWQVTLHTTSPTQR_	P03951	1.80182	1.80182	4.46445e-06	7.12177e-06	18	P03951	F11	Coagulation factor XI	FA11_HUMAN	1	248.659	3.48659	Dengue	QC	NaN	NaN	NaN	11.4241	0.199058
Dengue / QC	_IAQWQSLK_	P20742	2.60983	2.60983	4.47758e-06	7.14068e-06	72	P20742	PZP	Pregnancy zone protein	PZP_HUMAN	1	510.431	6.10431	Dengue	QC	NaN	NaN	NaN	54.0615	0.521281
Dengue / QC	_NFPDLNTYIYYNEK_	P15169	0.494628	0.494628	4.49104e-06	7.15808e-06	114	P15169	CPN1	Carboxypeptidase N catalytic chain	CBPN_HUMAN	1	40.8958	1.40896	Dengue	QC	NaN	NaN	NaN	39.0332	0.0984202
Dengue / QC	_AIHLDLEEYR_	Q96KN2	0.507579	0.507579	4.56165e-06	7.26442e-06	84	Q96KN2	CNDP1	Beta-Ala-His dipeptidase	CNDP1_HUMAN	1	42.1662	1.42166	Dengue	QC	NaN	NaN	NaN	76.0006	0.113116
Dengue / QC	_NAIGGKFPLYNLGFGNNLNYNFLENM[Oxidation (M)]ALENHGFAR_	Q06033;Q06033-2	0.424858	0.424858	4.56848e-06	7.27323e-06	38	Q06033;Q06033-2	ITIH3	Inter-alpha-trypsin inhibitor heavy chain H3;Isoform 2 of Inter-alpha-trypsin inhibitor heavy chain H3	ITIH3_HUMAN	1	34.2441	1.34244	Dengue	QC	NaN	NaN	NaN	15.2079	0.877518
Dengue / QC	_EDYLDVYVFGVGPLVNQVNINALASK_	B4E1Z4	1.0349	1.0349	4.57077e-06	7.27481e-06	136	B4E1Z4	NaN	cDNA FLJ55673, highly similar to Complement factor B (EC 3.4.21.47)	B4E1Z4_HUMAN	1	104.897	2.04897	Dengue	QC	NaN	NaN	NaN	26.0122	0.1423
Dengue / QC	_YENC[Carbamidomethyl (C)]PKDNPMYYC[Carbamidomethyl (C)]NKK_	O75882;O75882-2;O75882-3	2.05411	2.05411	4.604e-06	7.32353e-06	20	O75882;O75882-2;O75882-3	ATRN	Attractin;Isoform 2 of Attractin;Isoform 3 of Attractin	ATRN_HUMAN	1	315.288	4.15288	Dengue	QC	NaN	NaN	NaN	14.2659	0.33539
Dengue / QC	_FSPATHPSEGLEENYC[Carbamidomethyl (C)]RNPDNDPQGPWC[Carbamidomethyl (C)]YTTDPEKR_	P00747	0.365335	0.365335	4.64729e-06	7.38611e-06	174	P00747	PLG	Plasminogen	PLMN_HUMAN	1	28.818	1.28818	Dengue	QC	NaN	NaN	NaN	89.5345	0.0686035
Dengue / QC	_AHLDIAGSLEGHLR_	P04114	0.51993	0.51993	4.66652e-06	7.41037e-06	54	P04114	APOB	Apolipoprotein B-100	APOB_HUMAN	1	43.3886	1.43389	Dengue	QC	NaN	NaN	NaN	49.6047	0.126712
Dengue / QC	_VVWC[Carbamidomethyl (C)]AVGEQELRK_	E7ER44;P02788	1.49703	1.49703	4.74883e-06	7.52827e-06	30	E7ER44;P02788	LTF	Lactotransferrin	E7ER44_HUMAN;TRFL_HUMAN	1	182.262	2.82262	Dengue	QC	NaN	NaN	NaN	18.9999	0.284881
Dengue / QC	_LVVLPFPK_	Q9UGM5	-0.489742	0.489742	4.76758e-06	7.55586e-06	174	Q9UGM5	FETUB	Fetuin-B	FETUB_HUMAN	1	-28.7848	0.712152	Dengue	QC	NaN	NaN	NaN	60.1573	0.0886103
Dengue / QC	_YIETDPANRDRR_	P06396	1.95912	1.95912	4.81508e-06	7.62467e-06	30	P06396	GSN	Gelsolin	GELS_HUMAN	1	288.824	3.88824	Dengue	QC	NaN	NaN	NaN	18.6495	0.311363
Dengue / QC	_FSPATHPSEGLEENYC[Carbamidomethyl (C)]RNPDNDPQGPWC[Carbamidomethyl (C)]YTTDPEK_	P00747	0.256133	0.256133	4.86705e-06	7.69826e-06	138	P00747	PLG	Plasminogen	PLMN_HUMAN	1	19.4273	1.19427	Dengue	QC	NaN	NaN	NaN	50.8927	0.0567837
Dengue / QC	_GDVAFVKHQTVPQNTGGKNPDPWAK_	P02787	0.779468	0.779468	4.87338e-06	7.70611e-06	154	P02787	TF	Serotransferrin	TRFE_HUMAN	1	71.6498	1.7165	Dengue	QC	NaN	NaN	NaN	140.146	0.131559
Dengue / QC	_TPFDYC[Carbamidomethyl (C)]ALRR_	G3XAK1;P26927	1.00357	1.00357	4.8924e-06	7.73182e-06	92	G3XAK1;P26927	MST1	Hepatocyte growth factor-like protein	G3XAK1_HUMAN;HGFL_HUMAN	1	100.496	2.00496	Dengue	QC	NaN	NaN	NaN	82.6741	0.164138
Dengue / QC	_NANFKFTDHLK_	P00738	2.07235	2.07235	4.9887e-06	7.87956e-06	84	P00738	HP	Haptoglobin	HPT_HUMAN	1	320.57	4.2057	Dengue	QC	NaN	NaN	NaN	55.6908	0.357338
Dengue / QC	_NSLYLQM[Oxidation (M)]NSLR_	P01782	-0.630358	0.630358	5.08724e-06	8.0239e-06	156	P01782	IGHV3-9	Immunoglobulin heavy variable 3-9	HV309_HUMAN	1	-35.3984	0.646016	Dengue	QC	NaN	NaN	NaN	61.5293	0.130743
Dengue / QC	_RNPADPQRIPSNPSHR_	Q12805;Q12805-2;Q12805-4	2.65772	2.65772	5.14351e-06	8.10124e-06	24	Q12805;Q12805-2;Q12805-4	EFEMP1	EGF-containing fibulin-like extracellular matrix protein 1;Isoform 2 of EGF-containing fibulin-like extracellular matrix protein 1;Isoform 4 of EGF-containing fibulin-like extracellular matrix protein 1	FBLN3_HUMAN	1	531.033	6.31033	Dengue	QC	NaN	NaN	NaN	13.6125	0.346637
Dengue / QC	_YKEENDDFASFR_	P04196	-0.262142	0.262142	5.18495e-06	8.15964e-06	176	P04196	HRG	Histidine-rich glycoprotein	HRG_HUMAN	1	-16.6151	0.833849	Dengue	QC	NaN	NaN	NaN	71.9241	0.0578178
Dengue / QC	_ESGPVLVKPTETLTLTC[Carbamidomethyl (C)]TVSGFSLSNAR_	A0A0B4J1V2	0.792785	0.792785	5.20687e-06	8.18494e-06	86	A0A0B4J1V2	IGHV2-26	Immunoglobulin heavy variable 2-26	HV226_HUMAN	1	73.2416	1.73242	Dengue	QC	NaN	NaN	NaN	72.4365	0.172965
Dengue / QC	_GFYPSDIAVEWESSGQPENNYNTTPPMLDSDGSFFLYSK_	P01860	1.52434	1.52434	5.206e-06	8.18494e-06	28	P01860	IGHG3	Immunoglobulin heavy constant gamma 3	IGHG3_HUMAN	1	187.655	2.87655	Dengue	QC	NaN	NaN	NaN	16.4367	0.276551
Dengue / QC	_VPQTDMTFR_	P04114	0.350878	0.350878	5.28217e-06	8.294e-06	96	P04114	APOB	Apolipoprotein B-100	APOB_HUMAN	1	27.5336	1.27534	Dengue	QC	NaN	NaN	NaN	79.473	0.0883335
Dengue / QC	_TIVRFNRPFLMIIVPTDTQNIFFM[Oxidation (M)]SK_	P01011	1.32214	1.32214	5.38523e-06	8.44636e-06	100	P01011	SERPINA3	Alpha-1-antichymotrypsin	AACT_HUMAN	1	150.036	2.50036	Dengue	QC	NaN	NaN	NaN	78.6431	0.233927
Dengue / QC	_ITENDIQIALDDAK_	P04114	0.236102	0.236102	5.39006e-06	8.45157e-06	148	P04114	APOB	Apolipoprotein B-100	APOB_HUMAN	1	17.7806	1.17781	Dengue	QC	NaN	NaN	NaN	72.7652	0.0802376
Dengue / QC	_TC[Carbamidomethyl (C)]QAWSSMTPHSHSR_	P08519	1.24657	1.24657	5.421e-06	8.49533e-06	148	P08519	LPA	Apolipoprotein(a)	APOA_HUMAN	1	137.277	2.37277	Dengue	QC	NaN	NaN	NaN	126.742	0.227589
Dengue / QC	_NDLGWYQQK_	A0A0C4DH72	0.333642	0.333642	5.57871e-06	8.72211e-06	98	A0A0C4DH72	IGKV1-6	Immunoglobulin kappa variable 1-6	KV106_HUMAN	1	26.0191	1.26019	Dengue	QC	NaN	NaN	NaN	71.5022	0.175275
Dengue / QC	_LLIYGASIR_	A0A087WSY6	-0.384426	0.384426	5.68408e-06	8.87039e-06	176	A0A087WSY6	IGKV3D-15	Immunoglobulin kappa variable 3D-15	KVD15_HUMAN	1	-23.3916	0.766084	Dengue	QC	NaN	NaN	NaN	90.1438	0.0724932
Dengue / QC	_RQLTPYAQR_	P06727	0.656145	0.656145	5.74469e-06	8.94753e-06	42	P06727	APOA4	Apolipoprotein A-IV	APOA4_HUMAN	1	57.5866	1.57587	Dengue	QC	NaN	NaN	NaN	17.2043	0.127432
Dengue / QC	_APNHAVVTR_	P02787	0.924563	0.924563	5.76455e-06	8.97598e-06	128	P02787	TF	Serotransferrin	TRFE_HUMAN	1	89.811	1.89811	Dengue	QC	NaN	NaN	NaN	63.4269	0.166981
Dengue / QC	_QVR[Methyl (KR)]EPGQDLVVLPLSITTDFIPSFR_	P01024	0.751576	0.751576	5.91578e-06	9.19103e-06	48	P01024	C3	Complement C3	CO3_HUMAN	1	68.3631	1.68363	Dengue	QC	NaN	NaN	NaN	24.8368	0.274713
Dengue / QC	_NKPGVYTDVAYYLAWIR_	P00748	1.29137	1.29137	5.94806e-06	9.23606e-06	48	P00748	F12	Coagulation factor XII	FA12_HUMAN	1	144.761	2.44761	Dengue	QC	NaN	NaN	NaN	30.0919	0.223883
Dengue / QC	_FEGIAC[Carbamidomethyl (C)]EISK_	P02748	-0.336537	0.336537	5.98561e-06	9.28664e-06	174	P02748	C9	Complement component C9	CO9_HUMAN	1	-20.806	0.79194	Dengue	QC	NaN	NaN	NaN	80.0697	0.067018
Dengue / QC	_AQLVPLPPSTYVEFTVSGTDC[Carbamidomethyl (C)]VAKEATEAAK_	P02765	0.971951	0.971951	6.0785e-06	9.41512e-06	138	P02765	AHSG	Alpha-2-HS-glycoprotein	FETUA_HUMAN	1	96.1492	1.96149	Dengue	QC	NaN	NaN	NaN	97.9443	0.162983
Dengue / QC	_C[Carbamidomethyl (C)]KSSNLIILEEHLK_	P08603	1.03321	1.03321	6.08874e-06	9.42837e-06	116	P08603	CFH	Complement factor H	CFAH_HUMAN	1	104.658	2.04658	Dengue	QC	NaN	NaN	NaN	105.15	0.181087
Dengue / QC	_TSETKHDTSLKPISVSYNPATAK_	P00915	0.65382	0.65382	6.16194e-06	9.53646e-06	132	P00915	CA1	Carbonic anhydrase 1	CAH1_HUMAN	1	57.3329	1.57333	Dengue	QC	NaN	NaN	NaN	105.566	0.125045
Dengue / QC	_YDYC[Carbamidomethyl (C)]DILEC[Carbamidomethyl (C)]EEEC[Carbamidomethyl (C)]MHC[Carbamidomethyl (C)]SGENYDGK_	P00747	0.333002	0.333002	6.17828e-06	9.55573e-06	170	P00747	PLG	Plasminogen	PLMN_HUMAN	1	25.9632	1.25963	Dengue	QC	NaN	NaN	NaN	90.7001	0.0614196
Dengue / QC	_LGLGADVAQVTGALR_	P14780	1.54293	1.54293	6.29578e-06	9.72479e-06	46	P14780	MMP9	Matrix metalloproteinase-9	MMP9_HUMAN	1	191.385	2.91385	Dengue	QC	NaN	NaN	NaN	35.3068	0.258427
Dengue / QC	_YEKPGSPPREVVPR_	P02751;P02751-15;P02751-3;P02751-7	0.996748	0.996748	6.32766e-06	9.76865e-06	34	P02751;P02751-15;P02751-3;P02751-7	FN1	Fibronectin;Isoform 15 of Fibronectin;Isoform 3 of Fibronectin;Isoform 7 of Fibronectin	FINC_HUMAN	1	99.5496	1.9955	Dengue	QC	NaN	NaN	NaN	21.1428	0.180154
Dengue / QC	_TTPPMLDSDGSFFLYSKLTVDKSR_	P01859	1.58727	1.58727	6.3928e-06	9.85836e-06	46	P01859	IGHG2	Immunoglobulin heavy constant gamma 2	IGHG2_HUMAN	1	200.48	3.0048	Dengue	QC	NaN	NaN	NaN	37.5807	0.331417
Dengue / QC	_EQDLEVILHNGAC[Carbamidomethyl (C)]SPGAR_	P04275	0.897728	0.897728	6.39998e-06	9.86671e-06	32	P04275	VWF	von Willebrand factor	VWF_HUMAN	1	86.313	1.86313	Dengue	QC	NaN	NaN	NaN	24.239	0.144926
Dengue / QC	_EIFRWPESPK_	A0A0A0MS09;P01880;P01880-2	0.896254	0.896254	6.47259e-06	9.97042e-06	122	A0A0A0MS09;P01880;P01880-2	IGHD	Immunoglobulin heavy constant delta (Fragment);Immunoglobulin heavy constant delta;Isoform 2 of Immunoglobulin heavy constant delta	A0A0A0MS09_HUMAN;IGHD_HUMAN;IGHD_HUMAN	1	86.1227	1.86123	Dengue	QC	NaN	NaN	NaN	102.322	0.152433
Dengue / QC	_QRQEELC[Carbamidomethyl (C)]LAR_	P02753;Q5VY30	0.572877	0.572877	6.5201e-06	1.00326e-05	160	P02753;Q5VY30	RBP4	Retinol-binding protein 4;Retinol binding protein 4, plasma, isoform CRA_b	RET4_HUMAN;Q5VY30_HUMAN	1	48.7487	1.48749	Dengue	QC	NaN	NaN	NaN	133.411	0.112444
Dengue / QC	_AKGQPREPQVYTLPPSR_	P01857	0.69506	0.69506	6.52947e-06	1.00442e-05	176	P01857	IGHG1	Immunoglobulin heavy constant gamma 1	IGHG1_HUMAN	1	61.8951	1.61895	Dengue	QC	NaN	NaN	NaN	169.316	0.133765
Dengue / QC	_DTANLFPQTSLTLHMWPDTEGTFNVEC[Carbamidomethyl (C)]LTTDHYTGGMK_	P00450	0.549999	0.549999	6.55556e-06	1.00816e-05	144	P00450	CP	Ceruloplasmin	CERU_HUMAN	1	46.4085	1.46408	Dengue	QC	NaN	NaN	NaN	61.4359	0.100937
Dengue / QC	_LWAYLTIQQLLEQTVSASDADQQALR_	Q14624	0.81274	0.81274	6.60497e-06	1.01548e-05	56	Q14624	ITIH4	Inter-alpha-trypsin inhibitor heavy chain H4	ITIH4_HUMAN	1	75.6544	1.75654	Dengue	QC	NaN	NaN	NaN	13.9081	0.129545
Dengue / QC	_MYYSAVEPTKDIFTGLIGPM[Oxidation (M)]K_	E9PFZ2	1.62775	1.62775	6.68274e-06	1.02575e-05	42	E9PFZ2	CP	Ceruloplasmin	E9PFZ2_HUMAN	1	209.031	3.09031	Dengue	QC	NaN	NaN	NaN	7.23044	0.243408
Dengue / QC	_LMIYEVSNRPSGVPDR_	A0A075B6J9	-0.409129	0.409129	6.71139e-06	1.02958e-05	122	A0A075B6J9	IGLV2-18	Immunoglobulin lambda variable 2-18	LV218_HUMAN	1	-24.6922	0.753078	Dengue	QC	NaN	NaN	NaN	84.5569	0.105659
Dengue / QC	_AEAQAQYSAAVAK_	Q14624	-0.492658	0.492658	6.75953e-06	1.03612e-05	176	Q14624	ITIH4	Inter-alpha-trypsin inhibitor heavy chain H4	ITIH4_HUMAN	1	-28.9286	0.710714	Dengue	QC	NaN	NaN	NaN	45.9682	0.107559
Dengue / QC	_LGNGVQC[Carbamidomethyl (C)]LAMGWGLLGR_	P08246	2.56117	2.56117	6.88378e-06	1.05286e-05	16	P08246	ELANE	Neutrophil elastase	ELNE_HUMAN	1	490.187	5.90187	Dengue	QC	NaN	NaN	NaN	7.98185	0.475239
Dengue / QC	_GPDFFTR_	P20160	1.33371	1.33371	6.94539e-06	1.06141e-05	28	P20160	AZU1	Azurocidin	CAP7_HUMAN	1	152.05	2.5205	Dengue	QC	NaN	NaN	NaN	17.9461	0.246331
Dengue / QC	_GLEWMGIIYPGDSDTR[Methyl (KR)]_	A0A0C4DH38	2.16039	2.16039	7.10109e-06	1.08432e-05	28	A0A0C4DH38	IGHV5-51	Immunoglobulin heavy variable 5-51	HV551_HUMAN	1	347.036	4.47036	Dengue	QC	NaN	NaN	NaN	18.5839	0.365428
Dengue / QC	_LLELTGPK_	P04217	-0.371971	0.371971	7.10435e-06	1.08452e-05	176	P04217	A1BG	Alpha-1B-glycoprotein	A1BG_HUMAN	1	-22.7274	0.772726	Dengue	QC	NaN	NaN	NaN	52.2731	0.0746572
Dengue / QC	_SLAPYAQDTQEK_	P06727	0.471105	0.471105	7.1234e-06	1.08684e-05	106	P06727	APOA4	Apolipoprotein A-IV	APOA4_HUMAN	1	38.6171	1.38617	Dengue	QC	NaN	NaN	NaN	97.8238	0.0975407
Dengue / QC	_LAAYLM[Oxidation (M)]LMR_	P04114	0.48644	0.48644	7.14666e-06	1.08939e-05	22	P04114	APOB	Apolipoprotein B-100	APOB_HUMAN	1	40.0984	1.40098	Dengue	QC	NaN	NaN	NaN	17.4707	0.114774
Dengue / QC	_GRFTISRDNAK_	P01782	1.24347	1.24347	7.22199e-06	1.09919e-05	68	P01782	IGHV3-9	Immunoglobulin heavy variable 3-9	HV309_HUMAN	1	136.767	2.36767	Dengue	QC	NaN	NaN	NaN	51.5165	0.255763
Dengue / QC	_SFMLLILER_	P05543	0.314022	0.314022	7.23114e-06	1.10028e-05	70	P05543	SERPINA7	Thyroxine-binding globulin	THBG_HUMAN	1	24.3169	1.24317	Dengue	QC	NaN	NaN	NaN	31.4595	0.172743
Dengue / QC	_RGYQLSDVDGVTC[Carbamidomethyl (C)]EDIDEC[Carbamidomethyl (C)]ALPTGGHIC[Carbamidomethyl (C)]SYR_	P23142	0.816015	0.816015	7.23519e-06	1.1006e-05	134	P23142	FBLN1	Fibulin-1	FBLN1_HUMAN	1	76.0536	1.76054	Dengue	QC	NaN	NaN	NaN	105.344	0.240779
Dengue / QC	_GIETGSEDLEILPNGLAFISSGLKYPGIK_	P27169	0.764239	0.764239	7.26427e-06	1.10412e-05	162	P27169	PON1	Serum paraoxonase/arylesterase 1	PON1_HUMAN	1	69.8474	1.69847	Dengue	QC	NaN	NaN	NaN	77.8724	0.114302
Dengue / QC	_IGEHTPSALAIMENANVLAR_	J3KPS3;P04075	1.78457	1.78457	7.27457e-06	1.10539e-05	34	J3KPS3;P04075	ALDOA	Fructose-bisphosphate aldolase;Fructose-bisphosphate aldolase A	J3KPS3_HUMAN;ALDOA_HUMAN	1	244.515	3.44515	Dengue	QC	NaN	NaN	NaN	16.2717	0.249903
Dengue / QC	_DTEEEDFHVDQVTTVKVPMMKR_	P01009	1.99811	1.99811	7.43127e-06	1.12859e-05	18	P01009	SERPINA1	Alpha-1-antitrypsin	A1AT_HUMAN	1	299.476	3.99476	Dengue	QC	NaN	NaN	NaN	10.7544	0.314011
Dengue / QC	_YELDKAFSDRNTLIIYLDK_	P01024	0.955862	0.955862	7.45586e-06	1.1314e-05	48	P01024	C3	Complement C3	CO3_HUMAN	1	93.9738	1.93974	Dengue	QC	NaN	NaN	NaN	12.5736	0.125388
Dengue / QC	_VIQTAFQR_	P11597;P11597-2	0.714818	0.714818	7.48748e-06	1.13497e-05	40	P11597;P11597-2	CETP	Cholesteryl ester transfer protein;Isoform 2 of Cholesteryl ester transfer protein	CETP_HUMAN	1	64.1276	1.64128	Dengue	QC	NaN	NaN	NaN	27.6203	0.125701
Dengue / QC	_RMPC[Carbamidomethyl (C)]AEDYLSVVLNQLC[Carbamidomethyl (C)]VLHEKTPVSDR_	P02768	0.669174	0.669174	7.50078e-06	1.13668e-05	176	P02768	ALB	Serum albumin	ALBU_HUMAN	1	59.0162	1.59016	Dengue	QC	NaN	NaN	NaN	156.964	0.143763
Dengue / QC	_TVIGPDGHKEVTKEVVTSEDGSDC[Carbamidomethyl (C)]PEAMDLGTLSGIGTLDGFR_	P02671	1.72231	1.72231	7.63475e-06	1.15542e-05	112	P02671	FGA	Fibrinogen alpha chain	FIBA_HUMAN	1	229.965	3.29965	Dengue	QC	NaN	NaN	NaN	98.2662	0.28358
Dengue / QC	_ISASAEELR_	P06727	0.438843	0.438843	7.66291e-06	1.15812e-05	162	P06727	APOA4	Apolipoprotein A-IV	APOA4_HUMAN	1	35.5517	1.35552	Dengue	QC	NaN	NaN	NaN	156.471	0.0926649
Dengue / QC	_DALSSVQESQVAQQAR_	B0YIW2;P02656	-0.317908	0.317908	7.70816e-06	1.16464e-05	176	B0YIW2;P02656	APOC3	Apolipoprotein C-III	B0YIW2_HUMAN;APOC3_HUMAN	1	-19.7768	0.802232	Dengue	QC	NaN	NaN	NaN	128.144	0.0717433
Dengue / QC	_GMYGIENEVFLSLPC[Carbamidomethyl (C)]ILNAR_	P07195	1.53206	1.53206	7.90255e-06	1.19273e-05	18	P07195	LDHB	L-lactate dehydrogenase B chain	LDHB_HUMAN	1	189.199	2.89199	Dengue	QC	NaN	NaN	NaN	12.2003	0.259238
Dengue / QC	_VRVELLHNPAFC[Carbamidomethyl (C)]SLATTKR_	P01024	0.529663	0.529663	7.91696e-06	1.19458e-05	164	P01024	C3	Complement C3	CO3_HUMAN	1	44.3592	1.44359	Dengue	QC	NaN	NaN	NaN	148.988	0.100801
Dengue / QC	_GSFALSFPVESDVAPIAR_	P20742	1.33689	1.33689	7.92755e-06	1.19585e-05	124	P20742	PZP	Pregnancy zone protein	PZP_HUMAN	1	152.607	2.52607	Dengue	QC	NaN	NaN	NaN	85.5358	0.291997
Dengue / QC	_ASQSISSYLNWYQQKPGKAPK_	P01597;P04432	-0.334241	0.334241	7.95623e-06	1.19901e-05	138	P01597;P04432	IGKV1-39;IGKV1D-39	Immunoglobulin kappa variable 1-39;Immunoglobulin kappa variable 1D-39	KV139_HUMAN;KVD39_HUMAN	1	-20.6798	0.793202	Dengue	QC	NaN	NaN	NaN	109.802	0.108425
Dengue / QC	_NADLQVLKPEPELVYEDLR_	P01833	1.5736	1.5736	7.95699e-06	1.19901e-05	52	P01833	PIGR	Polymeric immunoglobulin receptor	PIGR_HUMAN	1	197.646	2.97646	Dengue	QC	NaN	NaN	NaN	37.5451	0.30412
Dengue / QC	_QAPGQELGWMGR_	A0A075B7D0	-0.389267	0.389267	7.9738e-06	1.20121e-05	176	A0A075B7D0	IGHV1OR15-1	Immunoglobulin heavy variable 1/OR15-1 (non-functional) (Fragment)	A0A075B7D0_HUMAN	1	-23.6482	0.763518	Dengue	QC	NaN	NaN	NaN	128.956	0.0785447
Dengue / QC	_VKENFDK_	P02753;Q5VY30	1.12452	1.12452	7.98243e-06	1.20202e-05	108	P02753;Q5VY30	RBP4	Retinol-binding protein 4;Retinol binding protein 4, plasma, isoform CRA_b	RET4_HUMAN;Q5VY30_HUMAN	1	118.029	2.18029	Dengue	QC	NaN	NaN	NaN	52.6773	0.171801
Dengue / QC	_DEPTYILNIK_	P04114	0.480276	0.480276	8.01671e-06	1.20606e-05	64	P04114	APOB	Apolipoprotein B-100	APOB_HUMAN	1	39.501	1.39501	Dengue	QC	NaN	NaN	NaN	46.4975	0.143418
Dengue / QC	_TTPSYVAFTDTER_	E9PKE3;P11142	0.843778	0.843778	8.08846e-06	1.21587e-05	46	E9PKE3;P11142	HSPA8	Heat shock cognate 71 kDa protein	E9PKE3_HUMAN;HSP7C_HUMAN	1	79.4744	1.79474	Dengue	QC	NaN	NaN	NaN	27.8285	0.176672
Dengue / QC	_VVSVDENFRPR_	P20742	2.58474	2.58474	8.14145e-06	1.22318e-05	72	P20742	PZP	Pregnancy zone protein	PZP_HUMAN	1	499.908	5.99908	Dengue	QC	NaN	NaN	NaN	47.9722	0.499488
Dengue / QC	_C[Carbamidomethyl (C)]C[Carbamidomethyl (C)]HC[Carbamidomethyl (C)]C[Carbamidomethyl (C)]LLGR_	P23142	1.38054	1.38054	8.15129e-06	1.22433e-05	72	P23142	FBLN1	Fibulin-1	FBLN1_HUMAN	1	160.366	2.60366	Dengue	QC	NaN	NaN	NaN	65.1973	0.29948
Dengue / QC	_GSPAINVAVHVFRK_	P02766	0.565258	0.565258	8.15442e-06	1.22447e-05	98	P02766	TTR	Transthyretin	TTHY_HUMAN	1	47.9652	1.47965	Dengue	QC	NaN	NaN	NaN	89.7456	0.104962
Dengue / QC	_C[Carbamidomethyl (C)]QPVDC[Carbamidomethyl (C)]GIPESIENGKVEDPESTLFGSVIR_	P09871	1.57253	1.57253	8.17474e-06	1.2272e-05	30	P09871	C1S	Complement C1s subcomponent	C1S_HUMAN	1	197.425	2.97425	Dengue	QC	NaN	NaN	NaN	18.6385	0.445494
Dengue / QC	_NPDAVAAPYC[Carbamidomethyl (C)]YTRDPGVR_	P08519	2.56923	2.56923	8.19361e-06	1.2297e-05	18	P08519	LPA	Apolipoprotein(a)	APOA_HUMAN	1	493.493	5.93493	Dengue	QC	NaN	NaN	NaN	12.0589	0.306071
Dengue / QC	_GSC[Carbamidomethyl (C)]ERDAQYAPGYDK_	B4E1Z4	1.65104	1.65104	8.21667e-06	1.2325e-05	26	B4E1Z4	NaN	cDNA FLJ55673, highly similar to Complement factor B (EC 3.4.21.47)	B4E1Z4_HUMAN	1	214.06	3.1406	Dengue	QC	NaN	NaN	NaN	18.1378	0.285691
Dengue / QC	_EILSVDC[Carbamidomethyl (C)]STNNPSQAK_	P10909;P10909-2;P10909-4;P10909-5	0.290838	0.290838	8.23397e-06	1.23476e-05	172	P10909;P10909-2;P10909-4;P10909-5	CLU	Clusterin;Isoform 2 of Clusterin;Isoform 4 of Clusterin;Isoform 5 of Clusterin	CLUS_HUMAN	1	22.3351	1.22335	Dengue	QC	NaN	NaN	NaN	121.816	0.0605786
Dengue / QC	_DNPMYYC[Carbamidomethyl (C)]NKK_	O75882;O75882-2;O75882-3	0.369256	0.369256	8.25101e-06	1.23699e-05	122	O75882;O75882-2;O75882-3	ATRN	Attractin;Isoform 2 of Attractin;Isoform 3 of Attractin	ATRN_HUMAN	1	29.1686	1.29169	Dengue	QC	NaN	NaN	NaN	67.7942	0.0839984
Dengue / QC	_NGFVMLSNKK_	P07225	0.570506	0.570506	8.27957e-06	1.24028e-05	108	P07225	PROS1	Vitamin K-dependent protein S	PROS_HUMAN	1	48.5044	1.48504	Dengue	QC	NaN	NaN	NaN	45.6796	0.111945
Dengue / QC	_SSQSLLHSDGK_	A0A075B6S2;A2NJV5	0.891098	0.891098	8.41943e-06	1.25887e-05	78	A0A075B6S2;A2NJV5	IGKV2D-29;IGKV2-29	Immunoglobulin kappa variable 2D-29;Immunoglobulin kappa variable 2-29	KVD29_HUMAN;KV229_HUMAN	1	85.4588	1.85459	Dengue	QC	NaN	NaN	NaN	64.3686	0.179461
Dengue / QC	_FTPTETNKAEQC[Carbamidomethyl (C)]C[Carbamidomethyl (C)]EETASSISLHGK_	P02748	-0.28468	0.28468	8.42474e-06	1.25933e-05	172	P02748	C9	Complement component C9	CO9_HUMAN	1	-17.9076	0.820924	Dengue	QC	NaN	NaN	NaN	89.2593	0.0623729
Dengue / QC	_EINLAPDSSSVVVSGLMVATK_	P02751;P02751-15;P02751-3;P02751-7	0.531385	0.531385	8.44226e-06	1.26161e-05	132	P02751;P02751-15;P02751-3;P02751-7	FN1	Fibronectin;Isoform 15 of Fibronectin;Isoform 3 of Fibronectin;Isoform 7 of Fibronectin	FINC_HUMAN	1	44.5316	1.44532	Dengue	QC	NaN	NaN	NaN	110.7	0.148242
Dengue / QC	_DTLTSRPAQGVVTTLENVSPPRR_	P02751;P02751-15;P02751-3;P02751-7	0.525065	0.525065	8.56668e-06	1.2785e-05	92	P02751;P02751-15;P02751-3;P02751-7	FN1	Fibronectin;Isoform 15 of Fibronectin;Isoform 3 of Fibronectin;Isoform 7 of Fibronectin	FINC_HUMAN	1	43.8999	1.439	Dengue	QC	NaN	NaN	NaN	62.6929	0.10015
Dengue / QC	_C[Carbamidomethyl (C)]AFSSQEPYFSYSGAFK_	E7ER44;P02788	1.04819	1.04819	8.83674e-06	1.31495e-05	26	E7ER44;P02788	LTF	Lactotransferrin	E7ER44_HUMAN;TRFL_HUMAN	1	106.793	2.06793	Dengue	QC	NaN	NaN	NaN	21.5364	0.186206
Dengue / QC	_VEDTAVYYC[Carbamidomethyl (C)]AR[Dimethyl (KR)]_	A0A075B7B8	0.253533	0.253533	8.93412e-06	1.32838e-05	170	A0A075B7B8	IGHV3OR16-12	Immunoglobulin heavy variable 3/OR16-12 (non-functional) (Fragment)	A0A075B7B8_HUMAN	1	19.2123	1.19212	Dengue	QC	NaN	NaN	NaN	101.659	0.0736082
Dengue / QC	_HQM[Oxidation (M)]DLVATLSQLGLQELFQAPDLR_	P08697	0.707471	0.707471	8.95253e-06	1.33042e-05	144	P08697	SERPINF2	Alpha-2-antiplasmin	A2AP_HUMAN	1	63.2939	1.63294	Dengue	QC	NaN	NaN	NaN	108.142	0.105939
Dengue / QC	_YGTLFTMDR_	Q15582	0.764591	0.764591	8.95081e-06	1.33042e-05	36	Q15582	TGFBI	Transforming growth factor-beta-induced protein ig-h3	BGH3_HUMAN	1	69.8888	1.69889	Dengue	QC	NaN	NaN	NaN	26.2678	0.133025
Dengue / QC	_AEPLAFTFSHDYK_	P04114	0.299068	0.299068	8.97113e-06	1.33247e-05	94	P04114	APOB	Apolipoprotein B-100	APOB_HUMAN	1	23.035	1.23035	Dengue	QC	NaN	NaN	NaN	50.3907	0.0849527
Dengue / QC	_EPAHLM[Oxidation (M)]SLFGGKPMIIYKGGTSR_	P06396	-0.106452	0.106452	9.06805e-06	1.34635e-05	12	P06396	GSN	Gelsolin	GELS_HUMAN	1	-7.11307	0.928869	Dengue	QC	NaN	NaN	NaN	5.9629	0.410332
Dengue / QC	_QDSLSSQNQLGVLPLSWDIPELVNM[Oxidation (M)]GQWK_	P01024	2.51992	2.51992	9.11109e-06	1.35183e-05	32	P01024	C3	Complement C3	CO3_HUMAN	1	473.551	5.73551	Dengue	QC	NaN	NaN	NaN	16.6139	0.289392
Dengue / QC	_SYSC[Carbamidomethyl (C)]QVTHEGSTVEKTVAPTEC[Carbamidomethyl (C)]S_	P0DOY2	1.59752	1.59752	9.11704e-06	1.35235e-05	162	P0DOY2	IGLC2	Immunoglobulin lambda constant 2	IGLC2_HUMAN	1	202.623	3.02623	Dengue	QC	NaN	NaN	NaN	144.529	0.295878
Dengue / QC	_ESSSHHPGIAEFPSR_	P02671	1.63937	1.63937	9.14669e-06	1.35603e-05	164	P02671	FGA	Fibrinogen alpha chain	FIBA_HUMAN	1	211.53	3.1153	Dengue	QC	NaN	NaN	NaN	138.76	0.301777
Dengue / QC	_ISEITNIVSK_	P20742	3.04437	3.04437	9.16594e-06	1.35853e-05	52	P20742	PZP	Pregnancy zone protein	PZP_HUMAN	1	724.987	8.24987	Dengue	QC	NaN	NaN	NaN	38.0332	0.556709
Dengue / QC	_LRYHGDPMPC[Carbamidomethyl (C)]PK_	P09871	0.647646	0.647646	9.19159e-06	1.36125e-05	66	P09871	C1S	Complement C1s subcomponent	C1S_HUMAN	1	56.661	1.56661	Dengue	QC	NaN	NaN	NaN	55.0764	0.141066
Dengue / QC	_QTLSWTVTPK_	P20742	2.39887	2.39887	9.21103e-06	1.36325e-05	102	P20742	PZP	Pregnancy zone protein	PZP_HUMAN	1	427.391	5.27391	Dengue	QC	NaN	NaN	NaN	52.1813	0.707014
Dengue / QC	_ASQGISNYLAWFQQKPGK_	P04430	0.448073	0.448073	9.2124e-06	1.36325e-05	84	P04430	IGKV1-16	Immunoglobulin kappa variable 1-16	KV116_HUMAN	1	36.4216	1.36422	Dengue	QC	NaN	NaN	NaN	64.9265	0.12659
Dengue / QC	_FSGSNSGNTATLTISR_	A0A075B6K5	-0.622319	0.622319	9.26612e-06	1.37084e-05	176	A0A075B6K5	IGLV3-9	Immunoglobulin lambda variable 3-9	LV39_HUMAN	1	-35.0374	0.649626	Dengue	QC	NaN	NaN	NaN	68.0727	0.123829
Dengue / QC	_LGM[Oxidation (M)]FNIQHC[Carbamidomethyl (C)]KK_	P01009	1.39923	1.39923	9.42793e-06	1.3922e-05	44	P01009	SERPINA1	Alpha-1-antitrypsin	A1AT_HUMAN	1	163.761	2.63761	Dengue	QC	NaN	NaN	NaN	22.0377	0.3216
Dengue / QC	_SDVM[Oxidation (M)]YTDWK_	P19652	-0.593718	0.593718	9.46905e-06	1.39754e-05	162	P19652	ORM2	Alpha-1-acid glycoprotein 2	A1AG2_HUMAN	1	-33.7367	0.662633	Dengue	QC	NaN	NaN	NaN	45.1009	0.120246
Dengue / QC	_MPYEC[Carbamidomethyl (C)]GPSLDVC[Carbamidomethyl (C)]AQDER_	P10643	0.349265	0.349265	9.73905e-06	1.43324e-05	176	P10643	C7	Complement component C7	CO7_HUMAN	1	27.3911	1.27391	Dengue	QC	NaN	NaN	NaN	147.891	0.0754171
Dengue / QC	_LLIYSNNQR[Dimethyl (KR)]PSGVPDR[Dimethyl (KR)]FSGSK_	P01699	1.13319	1.13319	9.8662e-06	1.44966e-05	90	P01699	IGLV1-44	Immunoglobulin lambda variable 1-44	LV144_HUMAN	1	119.344	2.19344	Dengue	QC	NaN	NaN	NaN	61.931	0.18645
Dengue / QC	_VLADKFIIPGLK_	P04114	0.142817	0.142817	9.87392e-06	1.45042e-05	66	P04114	APOB	Apolipoprotein B-100	APOB_HUMAN	1	10.4059	1.10406	Dengue	QC	NaN	NaN	NaN	51.247	0.0872512
Dengue / QC	_EYVLPSFEVIVEPTEK_	P01024	0.47735	0.47735	9.99232e-06	1.46589e-05	166	P01024	C3	Complement C3	CO3_HUMAN	1	39.2184	1.39218	Dengue	QC	NaN	NaN	NaN	141.415	0.0827309
Dengue / QC	_IIC[Carbamidomethyl (C)]DNTGITTVSK_	P05164;P05164-2;P05164-3	0.799631	0.799631	1.03446e-05	1.51559e-05	70	P05164;P05164-2;P05164-3	MPO	Myeloperoxidase;Isoform H14 of Myeloperoxidase;Isoform H7 of Myeloperoxidase	PERM_HUMAN	1	74.0656	1.74066	Dengue	QC	NaN	NaN	NaN	48.4519	0.179876
Dengue / QC	_ITFELVYEELLKR_	Q14624	0.485035	0.485035	1.03512e-05	1.51612e-05	110	Q14624	ITIH4	Inter-alpha-trypsin inhibitor heavy chain H4	ITIH4_HUMAN	1	39.962	1.39962	Dengue	QC	NaN	NaN	NaN	58.1935	0.100604
Dengue / QC	_GHFSISIPVKSDIAPVARLLIYAVLPTGDVIGDSAK_	P01023	2.50077	2.50077	1.04694e-05	1.53066e-05	62	P01023	A2M	Alpha-2-macroglobulin	A2MG_HUMAN	1	465.987	5.65987	Dengue	QC	NaN	NaN	NaN	21.6665	0.268866
Dengue / QC	_YTKKVPQVSTPTLVEVSR_	P02768	1.60395	1.60395	1.05118e-05	1.53647e-05	176	P02768	ALB	Serum albumin	ALBU_HUMAN	1	203.974	3.03974	Dengue	QC	NaN	NaN	NaN	162.744	0.296071
Dengue / QC	_RPSGVPDRFSGSK_	P01706	-0.846043	0.846043	1.06534e-05	1.55553e-05	106	P01706	IGLV2-11	Immunoglobulin lambda variable 2-11	LV211_HUMAN	1	-44.3691	0.556309	Dengue	QC	NaN	NaN	NaN	39.3609	0.174023
Dengue / QC	_SRWQQGNIFSC[Carbamidomethyl (C)]SVMHEALHNR_	P01860	0.632341	0.632341	1.06561e-05	1.55553e-05	118	P01860	IGHG3	Immunoglobulin heavy constant gamma 3	IGHG3_HUMAN	1	55.0079	1.55008	Dengue	QC	NaN	NaN	NaN	110.309	0.105933
Dengue / QC	_NGVAQEPVHLDSPAIKHQFLLTGDTQGR_	P04217	0.694776	0.694776	1.07501e-05	1.56884e-05	168	P04217	A1BG	Alpha-1B-glycoprotein	A1BG_HUMAN	1	61.8634	1.61863	Dengue	QC	NaN	NaN	NaN	158.371	0.130742
Dengue / QC	_VQQPDC[Carbamidomethyl (C)]R_	P0C0L5	0.553349	0.553349	1.07919e-05	1.57412e-05	112	P0C0L5	C4B	Complement C4-B	CO4B_HUMAN	1	46.7489	1.46749	Dengue	QC	NaN	NaN	NaN	55.7185	0.115099
Dengue / QC	_IVEGSDAEIGMSPWQVMLFRK_	P00734	0.343767	0.343767	1.0796e-05	1.57431e-05	160	P00734	F2	Prothrombin	THRB_HUMAN	1	26.9066	1.26907	Dengue	QC	NaN	NaN	NaN	131.156	0.0799091
Dengue / QC	_TDGEGALSEPSATVTIEELAAPPPPVLM[Oxidation (M)]HHGESSQVLHPGNK_	P04217	0.611594	0.611594	1.08452e-05	1.58011e-05	130	P04217	A1BG	Alpha-1B-glycoprotein	A1BG_HUMAN	1	52.7947	1.52795	Dengue	QC	NaN	NaN	NaN	87.6268	0.106509
Dengue / QC	_C[Carbamidomethyl (C)]LDPC[Carbamidomethyl (C)]VVSEENMNKNNIQLK_	Q9BXR6	0.76229	0.76229	1.08471e-05	1.58011e-05	40	Q9BXR6	CFHR5	Complement factor H-related protein 5	FHR5_HUMAN	1	69.6181	1.69618	Dengue	QC	NaN	NaN	NaN	26.8123	0.176616
Dengue / QC	_ALVLIAFAQYLQQC[Carbamidomethyl (C)]PFEDHVKLVNEVTEFAK_	P02768	0.706306	0.706306	1.10197e-05	1.60276e-05	150	P02768	ALB	Serum albumin	ALBU_HUMAN	1	63.1621	1.63162	Dengue	QC	NaN	NaN	NaN	115.735	0.126796
Dengue / QC	_EIGELYLPK_	P01011	-0.36824	0.36824	1.10541e-05	1.60693e-05	176	P01011	SERPINA3	Alpha-1-antichymotrypsin	AACT_HUMAN	1	-22.5273	0.774727	Dengue	QC	NaN	NaN	NaN	132.111	0.0727537
Dengue / QC	_NDLGWYQQK[Methyl (KR)]PGK_	A0A0C4DH72	1.12781	1.12781	1.1227e-05	1.6308e-05	32	A0A0C4DH72	IGKV1-6	Immunoglobulin kappa variable 1-6	KV106_HUMAN	1	118.527	2.18527	Dengue	QC	NaN	NaN	NaN	12.2412	1.08219
Dengue / QC	_LFDSDPITVTVPVEVSR_	P10909;P10909-2;P10909-4;P10909-5	0.285497	0.285497	1.13141e-05	1.64302e-05	170	P10909;P10909-2;P10909-4;P10909-5	CLU	Clusterin;Isoform 2 of Clusterin;Isoform 4 of Clusterin;Isoform 5 of Clusterin	CLUS_HUMAN	1	21.883	1.21883	Dengue	QC	NaN	NaN	NaN	123.374	0.0723254
Dengue / QC	_ADSSPVK[Methyl (KR)]AGVETTTPSK_	P0DOY2	0.918532	0.918532	1.17328e-05	1.69956e-05	84	P0DOY2	IGLC2	Immunoglobulin lambda constant 2	IGLC2_HUMAN	1	89.0191	1.89019	Dengue	QC	NaN	NaN	NaN	34.7078	1.12979
Dengue / QC	_KHYLMWGLSSDFWGEKPNLSYIIGK_	P01024	0.559997	0.559997	1.17691e-05	1.70424e-05	172	P01024	C3	Complement C3	CO3_HUMAN	1	47.4266	1.47427	Dengue	QC	NaN	NaN	NaN	100.791	0.0977106
Dengue / QC	_M[Oxidation (M)]TVTDQVNC[Carbamidomethyl (C)]PK_	P05090	1.91175	1.91175	1.18043e-05	1.70802e-05	70	P05090	APOD	Apolipoprotein D	APOD_HUMAN	1	276.266	3.76266	Dengue	QC	NaN	NaN	NaN	34.6274	0.344347
Dengue / QC	_LLGMETMAWQEIR_	B4E1Z4	0.605161	0.605161	1.18714e-05	1.71684e-05	62	B4E1Z4	NaN	cDNA FLJ55673, highly similar to Complement factor B (EC 3.4.21.47)	B4E1Z4_HUMAN	1	52.1148	1.52115	Dengue	QC	NaN	NaN	NaN	51.4529	0.123891
Dengue / QC	_TTEYYPNGGLTR_	P08519	1.86582	1.86582	1.19295e-05	1.72434e-05	108	P08519	LPA	Apolipoprotein(a)	APOA_HUMAN	1	264.475	3.64475	Dengue	QC	NaN	NaN	NaN	86.318	0.281183
Dengue / QC	_RPVKLLSGGNTLHLVSTTK_	P04114	0.676685	0.676685	1.19602e-05	1.72789e-05	78	P04114	APOB	Apolipoprotein B-100	APOB_HUMAN	1	59.8463	1.59846	Dengue	QC	NaN	NaN	NaN	62.763	0.161508
Dengue / QC	_MYSVNGYTFGSLPGLSMC[Carbamidomethyl (C)]AEDR_	P00450	0.527893	0.527893	1.20111e-05	1.73435e-05	134	P00450	CP	Ceruloplasmin	CERU_HUMAN	1	44.1822	1.44182	Dengue	QC	NaN	NaN	NaN	80.6689	0.129237
Dengue / QC	_EGVYTVFAPTNEAFR_	Q15582	0.516675	0.516675	1.22877e-05	1.77109e-05	44	Q15582	TGFBI	Transforming growth factor-beta-induced protein ig-h3	BGH3_HUMAN	1	43.0654	1.43065	Dengue	QC	NaN	NaN	NaN	34.7515	0.172336
Dengue / QC	_TYMLAFDVNDEKNWGLSVYADKPETTK_	P02763	0.391861	0.391861	1.24522e-05	1.79098e-05	174	P02763	ORM1	Alpha-1-acid glycoprotein 1	A1AG1_HUMAN	1	31.2085	1.31209	Dengue	QC	NaN	NaN	NaN	134.201	0.0967435
Dengue / QC	_DEPTYILNIKR_	P04114	2.16078	2.16078	1.2818e-05	1.83847e-05	12	P04114	APOB	Apolipoprotein B-100	APOB_HUMAN	1	347.156	4.47156	Dengue	QC	NaN	NaN	NaN	5.40438	0.138272
Dengue / QC	_SGTHTLPVESGDMK_	P20742	2.97101	2.97101	1.28554e-05	1.84296e-05	96	P20742	PZP	Pregnancy zone protein	PZP_HUMAN	1	684.084	7.84084	Dengue	QC	NaN	NaN	NaN	66.491	0.624623
Dengue / QC	_SSGSLLNNAIK_	P01023	-0.40156	0.40156	1.28751e-05	1.84532e-05	176	P01023	A2M	Alpha-2-macroglobulin	A2MG_HUMAN	1	-24.2961	0.757039	Dengue	QC	NaN	NaN	NaN	91.3528	0.0763267
Dengue / QC	_FLDQGLDDNYC[Carbamidomethyl (C)]R_	G3XAK1;P26927	0.800208	0.800208	1.29278e-05	1.85192e-05	22	G3XAK1;P26927	MST1	Hepatocyte growth factor-like protein	G3XAK1_HUMAN;HGFL_HUMAN	1	74.1352	1.74135	Dengue	QC	NaN	NaN	NaN	15.1674	0.0750537
Dengue / QC	_LLIYGNSNRPSGVPDR_	P01703	-0.680856	0.680856	1.29741e-05	1.85808e-05	170	P01703	IGLV1-40	Immunoglobulin lambda variable 1-40	LV140_HUMAN	1	-37.6205	0.623795	Dengue	QC	NaN	NaN	NaN	52.0278	0.139681
Dengue / QC	_YLYEIARRHPYFYAPELLFFAK_	P02768	0.470338	0.470338	1.34185e-05	1.91683e-05	140	P02768	ALB	Serum albumin	ALBU_HUMAN	1	38.5434	1.38543	Dengue	QC	NaN	NaN	NaN	82.0436	0.0925601
Dengue / QC	_DTANLFPQTSLTLHM[Oxidation (M)]WPDTEGTFNVEC[Carbamidomethyl (C)]LTTDHYTGGMK_	P00450	0.387094	0.387094	1.34151e-05	1.91683e-05	94	P00450	CP	Ceruloplasmin	CERU_HUMAN	1	30.7757	1.30776	Dengue	QC	NaN	NaN	NaN	59.0589	0.202738
Dengue / QC	_DHLGFQVTWPDESK_	P22792	0.458718	0.458718	1.35045e-05	1.92862e-05	128	P22792	CPN2	Carboxypeptidase N subunit 2	CPN2_HUMAN	1	37.432	1.37432	Dengue	QC	NaN	NaN	NaN	52.7275	0.129425
Dengue / QC	_HKVYAC[Carbamidomethyl (C)]EVTHQGLSSPVTK_	P01834	0.827817	0.827817	1.35284e-05	1.93154e-05	166	P01834	IGKC	Immunoglobulin kappa constant	IGKC_HUMAN	1	77.4997	1.775	Dengue	QC	NaN	NaN	NaN	157.056	0.179991
Dengue / QC	_ADGSPVKVGVETTKPSK_	A0M8Q6	1.57803	1.57803	1.38622e-05	1.97468e-05	44	A0M8Q6	IGLC7	Immunoglobulin lambda constant 7	IGLC7_HUMAN	1	198.561	2.98561	Dengue	QC	NaN	NaN	NaN	28.0796	0.323413
Dengue / QC	_SLAKVEK_	P01008	0.779774	0.779774	1.38708e-05	1.97539e-05	48	P01008	SERPINC1	Antithrombin-III	ANT3_HUMAN	1	71.6862	1.71686	Dengue	QC	NaN	NaN	NaN	31.8058	0.161774
Dengue / QC	_NM[Oxidation (M)]EQFQVSVSVAPNAK_	Q14624	1.40585	1.40585	1.40453e-05	1.99822e-05	72	Q14624	ITIH4	Inter-alpha-trypsin inhibitor heavy chain H4	ITIH4_HUMAN	1	164.974	2.64974	Dengue	QC	NaN	NaN	NaN	63.0619	0.269085
Dengue / QC	_FTNIGPDTMR_	P02751;P02751-15;P02751-3;P02751-7	0.177946	0.177946	1.4123e-05	2.00775e-05	164	P02751;P02751-15;P02751-3;P02751-7	FN1	Fibronectin;Isoform 15 of Fibronectin;Isoform 3 of Fibronectin;Isoform 7 of Fibronectin	FINC_HUMAN	1	13.1272	1.13127	Dengue	QC	NaN	NaN	NaN	146.912	0.0695446
Dengue / QC	_FSSHVGGTLGQFYQEVLWGSPAASDDGRR_	Q14624	0.359671	0.359671	1.41982e-05	2.01792e-05	132	Q14624	ITIH4	Inter-alpha-trypsin inhibitor heavy chain H4	ITIH4_HUMAN	1	28.3133	1.28313	Dengue	QC	NaN	NaN	NaN	95.7054	0.0906926
Dengue / QC	_LADFALLC[Carbamidomethyl (C)]LDGK_	E7ER44;P02788	1.05337	1.05337	1.42216e-05	2.02022e-05	54	E7ER44;P02788	LTF	Lactotransferrin	E7ER44_HUMAN;TRFL_HUMAN	1	107.537	2.07537	Dengue	QC	NaN	NaN	NaN	43.0798	0.238041
Dengue / QC	_TQSSDGKAQMQSPA_	H0YAC1;P03952	0.602001	0.602001	1.43622e-05	2.03865e-05	78	H0YAC1;P03952	KLKB1	Plasma kallikrein (Fragment);Plasma kallikrein	H0YAC1_HUMAN;KLKB1_HUMAN	1	51.782	1.51782	Dengue	QC	NaN	NaN	NaN	44.9321	0.119672
Dengue / QC	_DSHSLTTNIMEILR_	P02671	1.97576	1.97576	1.44284e-05	2.04753e-05	68	P02671	FGA	Fibrinogen alpha chain	FIBA_HUMAN	1	293.334	3.93334	Dengue	QC	NaN	NaN	NaN	35.0874	0.244814
Dengue / QC	_PSGVPDRFSGSK_	P01703	-0.244676	0.244676	1.44472e-05	2.04864e-05	14	P01703	IGLV1-40	Immunoglobulin lambda variable 1-40	LV140_HUMAN	1	-15.5995	0.844005	Dengue	QC	NaN	NaN	NaN	3.64865	0.140534
Dengue / QC	_QLPGGQNPVSYVYLEVVSK_	P01031	0.508518	0.508518	1.48583e-05	2.10373e-05	144	P01031	C5	Complement C5	CO5_HUMAN	1	42.2588	1.42259	Dengue	QC	NaN	NaN	NaN	88.7887	0.101606
Dengue / QC	_GVYSSDVFDIFPGTYQTLEM[Oxidation (M)]FPR_	P00450	0.435567	0.435567	1.48546e-05	2.10373e-05	168	P00450	CP	Ceruloplasmin	CERU_HUMAN	1	35.2442	1.35244	Dengue	QC	NaN	NaN	NaN	91.5747	0.0749853
Dengue / QC	_MATTMIQSK_	P19823	0.530753	0.530753	1.50987e-05	2.1367e-05	176	P19823	ITIH2	Inter-alpha-trypsin inhibitor heavy chain H2	ITIH2_HUMAN	1	44.4683	1.44468	Dengue	QC	NaN	NaN	NaN	103.779	0.0971146
Dengue / QC	_PLVEEPQNLIK_	P02768	-0.335282	0.335282	1.51681e-05	2.14544e-05	158	P02768	ALB	Serum albumin	ALBU_HUMAN	1	-20.7371	0.792629	Dengue	QC	NaN	NaN	NaN	98.8791	0.0618875
Dengue / QC	_NVHWYQQK_	A0A075B6K5	0.283765	0.283765	1.51856e-05	2.14736e-05	72	A0A075B6K5	IGLV3-9	Immunoglobulin lambda variable 3-9	LV39_HUMAN	1	21.7368	1.21737	Dengue	QC	NaN	NaN	NaN	33.3633	0.145516
Dengue / QC	_EGQMESVEAAM[Oxidation (M)]SSK_	P05543	1.03167	1.03167	1.52762e-05	2.158e-05	18	P05543	SERPINA7	Thyroxine-binding globulin	THBG_HUMAN	1	104.438	2.04438	Dengue	QC	NaN	NaN	NaN	8.75297	0.245763
Dengue / QC	_LYHSEAFTVNFGDTEEAKK_	P01009	-0.355083	0.355083	1.53171e-05	2.16214e-05	158	P01009	SERPINA1	Alpha-1-antitrypsin	A1AT_HUMAN	1	-21.8176	0.781824	Dengue	QC	NaN	NaN	NaN	68.1758	0.0825173
Dengue / QC	_TPDGSLLVR_	Q9Y6R7	0.701992	0.701992	1.53444e-05	2.16545e-05	88	Q9Y6R7	FCGBP	IgGFc-binding protein	FCGBP_HUMAN	1	62.6749	1.62675	Dengue	QC	NaN	NaN	NaN	63.9388	0.170464
Dengue / QC	_YVGGQEHFAHLLILRDTK_	P02763	1.19987	1.19987	1.54432e-05	2.17829e-05	144	P02763	ORM1	Alpha-1-acid glycoprotein 1	A1AG1_HUMAN	1	129.718	2.29718	Dengue	QC	NaN	NaN	NaN	130.507	0.230193
Dengue / QC	_RLGNGVQC[Carbamidomethyl (C)]LAMGWGLLGR_	P08246	2.48917	2.48917	1.56291e-05	2.20174e-05	24	P08246	ELANE	Neutrophil elastase	ELNE_HUMAN	1	461.453	5.61453	Dengue	QC	NaN	NaN	NaN	12.7174	0.338236
Dengue / QC	_GQGTLSVVTMYHAK_	P01024	-0.294328	0.294328	1.6051e-05	2.25664e-05	176	P01024	C3	Complement C3	CO3_HUMAN	1	-18.4548	0.815452	Dengue	QC	NaN	NaN	NaN	77.1072	0.0555752
Dengue / QC	_DNSKNTLYLQMNSLR_	A0A0J9YVT0;P0DP02	-0.481001	0.481001	1.60695e-05	2.25868e-05	176	A0A0J9YVT0;P0DP02	IGHV3-33;IGHV3-30-3	Immunoglobulin heavy variable 3-33 (Fragment);Immunoglobulin heavy variable 3-30-3	A0A0J9YVT0_HUMAN;HVC33_HUMAN	1	-28.352	0.71648	Dengue	QC	NaN	NaN	NaN	73.6899	0.0910422
Dengue / QC	_STATISGLKPGVDYTITVYAVTGR_	P02751;P02751-15;P02751-3;P02751-7	0.487207	0.487207	1.65171e-05	2.31694e-05	152	P02751;P02751-15;P02751-3;P02751-7	FN1	Fibronectin;Isoform 15 of Fibronectin;Isoform 3 of Fibronectin;Isoform 7 of Fibronectin	FINC_HUMAN	1	40.1728	1.40173	Dengue	QC	NaN	NaN	NaN	115.382	0.1056
Dengue / QC	_YEGGREHVAHLLFLRDTK_	P19652	0.922281	0.922281	1.65735e-05	2.32427e-05	106	P19652	ORM2	Alpha-1-acid glycoprotein 2	A1AG2_HUMAN	1	89.5109	1.89511	Dengue	QC	NaN	NaN	NaN	99.8868	0.184104
Dengue / QC	_LLFDGDAHLLMSIPSPFR_	Q9Y6R7	1.17169	1.17169	1.6602e-05	2.3271e-05	22	Q9Y6R7	FCGBP	IgGFc-binding protein	FCGBP_HUMAN	1	125.275	2.25275	Dengue	QC	NaN	NaN	NaN	9.07644	0.3693
Dengue / QC	_IFTVNHKLLPVGR_	P01024	0.868208	0.868208	1.66068e-05	2.3272e-05	56	P01024	C3	Complement C3	CO3_HUMAN	1	82.5394	1.82539	Dengue	QC	NaN	NaN	NaN	40.79	0.214021
Dengue / QC	_LQDNELR_	Q6EMK4	2.52246	2.52246	1.67099e-05	2.33931e-05	18	Q6EMK4	VASN	Vasorin	VASN_HUMAN	1	474.562	5.74562	Dengue	QC	NaN	NaN	NaN	7.99697	0.343706
Dengue / QC	_KNIFISPVSISMALAMLSLGTC[Carbamidomethyl (C)]GHTR_	P08185	0.837265	0.837265	1.67262e-05	2.341e-05	76	P08185	SERPINA6	Corticosteroid-binding globulin	CBG_HUMAN	1	78.666	1.78666	Dengue	QC	NaN	NaN	NaN	34.7735	0.275271
Dengue / QC	_NTLYLQMGSLR_	A0A075B6Q5	-0.585504	0.585504	1.68388e-05	2.35617e-05	100	A0A075B6Q5	IGHV3-64	Immunoglobulin heavy variable 3-64	HV364_HUMAN	1	-33.3583	0.666417	Dengue	QC	NaN	NaN	NaN	74.4539	0.110646
Dengue / QC	_VC[Carbamidomethyl (C)]KEFSHLGK_	P02774;P02774-3	1.04898	1.04898	1.68993e-05	2.36345e-05	24	P02774;P02774-3	GC	Vitamin D-binding protein;Isoform 3 of Vitamin D-binding protein	VTDB_HUMAN	1	106.907	2.06907	Dengue	QC	NaN	NaN	NaN	17.1812	0.234446
Dengue / QC	_IWHHTFYNELR_	P60709	1.15747	1.15747	1.69289e-05	2.367e-05	22	P60709	ACTB	Actin, cytoplasmic 1	ACTB_HUMAN	1	123.067	2.23067	Dengue	QC	NaN	NaN	NaN	15.7947	0.131567
Dengue / QC	_VDFTLSSER_	P0C0L5	-0.29819	0.29819	1.69727e-05	2.37254e-05	176	P0C0L5	C4B	Complement C4-B	CO4B_HUMAN	1	-18.6728	0.813272	Dengue	QC	NaN	NaN	NaN	111.982	0.0659646
Dengue / QC	_DSLDQLVGGVPVTLNAQTIDVNQETSDLDPSK_	P01031	0.275203	0.275203	1.75067e-05	2.4417e-05	108	P01031	C5	Complement C5	CO5_HUMAN	1	21.0164	1.21016	Dengue	QC	NaN	NaN	NaN	41.8769	0.118949
Dengue / QC	_VDAFC[Carbamidomethyl (C)]GGSIVNEK_	P00740	0.361748	0.361748	1.7557e-05	2.44749e-05	96	P00740	F9	Coagulation factor IX	FA9_HUMAN	1	28.4981	1.28498	Dengue	QC	NaN	NaN	NaN	83.3656	0.0789086
Dengue / QC	_LILVDYILFK_	G3V2W1;Q9UK55	1.10798	1.10798	1.75803e-05	2.45014e-05	16	G3V2W1;Q9UK55	SERPINA10	Protein Z-dependent protease inhibitor	G3V2W1_HUMAN;ZPI_HUMAN	1	115.544	2.15544	Dengue	QC	NaN	NaN	NaN	6.08354	0.569441
Dengue / QC	_TPC[Carbamidomethyl (C)]EEILVK_	P21333;P21333-2;Q5HY54	0.533552	0.533552	1.79148e-05	2.49304e-05	64	P21333;P21333-2;Q5HY54	FLNA	Filamin-A;Isoform 2 of Filamin-A;Filamin-A	FLNA_HUMAN;FLNA_HUMAN;Q5HY54_HUMAN	1	44.7489	1.44749	Dengue	QC	NaN	NaN	NaN	56.2112	0.120494
Dengue / QC	_KYSDASDC[Carbamidomethyl (C)]HGEDSQAFC[Carbamidomethyl (C)]EK_	P01023	-0.508234	0.508234	1.80457e-05	2.50917e-05	176	P01023	A2M	Alpha-2-macroglobulin	A2MG_HUMAN	1	-29.6917	0.703083	Dengue	QC	NaN	NaN	NaN	50.7472	0.116385
Dengue / QC	_AYSDMREANYIGSDK_	P0DJI8	1.01623	1.01623	1.80469e-05	2.50917e-05	38	P0DJI8	SAA1	Serum amyloid A-1 protein	SAA1_HUMAN	1	102.262	2.02262	Dengue	QC	NaN	NaN	NaN	30.0433	0.209139
Dengue / QC	_VNGVLTALPVSVADGR_	Q9Y6R7	0.66826	0.66826	1.82003e-05	2.52649e-05	82	Q9Y6R7	FCGBP	IgGFc-binding protein	FCGBP_HUMAN	1	58.9155	1.58915	Dengue	QC	NaN	NaN	NaN	73.8371	0.159608
Dengue / QC	_KKEVYM[Oxidation (M)]PSSIFQDDFVIPDISEPGTWK_	P0C0L5	1.26723	1.26723	1.82117e-05	2.52744e-05	158	P0C0L5	C4B	Complement C4-B	CO4B_HUMAN	1	140.698	2.40698	Dengue	QC	NaN	NaN	NaN	105.587	0.155695
Dengue / QC	_AGNNMLLVGVHGPR_	P21333;P21333-2;Q5HY54	0.411218	0.411218	1.83096e-05	2.53978e-05	86	P21333;P21333-2;Q5HY54	FLNA	Filamin-A;Isoform 2 of Filamin-A;Filamin-A	FLNA_HUMAN;FLNA_HUMAN;Q5HY54_HUMAN	1	32.9808	1.32981	Dengue	QC	NaN	NaN	NaN	78.0948	0.0944573
Dengue / QC	_YLTWASR_	A0A0G2JMB2	-0.463425	0.463425	1.8353e-05	2.54517e-05	172	A0A0G2JMB2	IGHA2	Immunoglobulin heavy constant alpha 2 (Fragment)	A0A0G2JMB2_HUMAN	1	-27.4737	0.725263	Dengue	QC	NaN	NaN	NaN	98.084	0.0926709
Dengue / QC	_RAPDLQDLPWQVK_	P22891;P22891-2	0.274052	0.274052	1.8433e-05	2.55563e-05	120	P22891;P22891-2	PROZ	Vitamin K-dependent protein Z;Isoform 2 of Vitamin K-dependent protein Z	PROZ_HUMAN	1	20.92	1.2092	Dengue	QC	NaN	NaN	NaN	104.287	0.0864631
Dengue / QC	_QVEGMEDWK_	P25311	0.551178	0.551178	1.8484e-05	2.56143e-05	26	P25311	AZGP1	Zinc-alpha-2-glycoprotein	ZA2G_HUMAN	1	46.5281	1.46528	Dengue	QC	NaN	NaN	NaN	19.3893	0.114581
Dengue / QC	_LESGVPSR_	A0A0G2JRQ6	0.575617	0.575617	1.8884e-05	2.61427e-05	158	A0A0G2JRQ6	NaN	Uncharacterized protein (Fragment)	A0A0G2JRQ6_HUMAN	1	49.0315	1.49031	Dengue	QC	NaN	NaN	NaN	148.014	0.131074
Dengue / QC	_FRVVSMDENFHPLNELIPLVYIQDPKGNR_	P01023	1.66347	1.66347	1.90908e-05	2.64095e-05	74	P01023	A2M	Alpha-2-macroglobulin	A2MG_HUMAN	1	216.779	3.16779	Dengue	QC	NaN	NaN	NaN	61.712	0.257674
Dengue / QC	_KIQALQQQADEAEDRAQGLQR_	P67936	1.09024	1.09024	1.93022e-05	2.66755e-05	30	P67936	TPM4	Tropomyosin alpha-4 chain	TPM4_HUMAN	1	112.91	2.1291	Dengue	QC	NaN	NaN	NaN	20.8821	0.175692
Dengue / QC	_LRSDDTAVYYC[Carbamidomethyl (C)]AR[Dimethyl (KR)]_	P23083	0.940003	0.940003	1.95494e-05	2.69907e-05	26	P23083	IGHV1-2	Immunoglobulin heavy variable 1-2	HV102_HUMAN	1	91.8533	1.91853	Dengue	QC	NaN	NaN	NaN	20.4079	0.220941
Dengue / QC	_GYSFTTTAER_	P60709	0.927328	0.927328	1.95755e-05	2.702e-05	18	P60709	ACTB	Actin, cytoplasmic 1	ACTB_HUMAN	1	90.1751	1.90175	Dengue	QC	NaN	NaN	NaN	11.0285	0.162319
Dengue / QC	_VSSFLPWIR_	P08311	0.904263	0.904263	1.96109e-05	2.70556e-05	56	P08311	CTSG	Cathepsin G	CATG_HUMAN	1	87.1588	1.87159	Dengue	QC	NaN	NaN	NaN	28.4588	0.275443
Dengue / QC	_LGADM[Oxidation (M)]EDVC[Carbamidomethyl (C)]GR_	P02649	0.915495	0.915495	1.96773e-05	2.7127e-05	60	P02649	APOE	Apolipoprotein E	APOE_HUMAN	1	88.6216	1.88622	Dengue	QC	NaN	NaN	NaN	45.5155	0.208617
Dengue / QC	_C[Carbamidomethyl (C)]STSPLLEAC[Carbamidomethyl (C)]EFLRK_	E7ER44;P02788	2.14464	2.14464	1.97196e-05	2.71787e-05	24	E7ER44;P02788	LTF	Lactotransferrin	E7ER44_HUMAN;TRFL_HUMAN	1	342.182	4.42182	Dengue	QC	NaN	NaN	NaN	18.0387	0.298726
Dengue / QC	_SC[Carbamidomethyl (C)]ALDQNC[Carbamidomethyl (C)]QWEPR_	O75882;O75882-2;O75882-3	0.461406	0.461406	1.98749e-05	2.73591e-05	172	O75882;O75882-2;O75882-3	ATRN	Attractin;Isoform 2 of Attractin;Isoform 3 of Attractin	ATRN_HUMAN	1	37.6883	1.37688	Dengue	QC	NaN	NaN	NaN	101.849	0.0942193
Dengue / QC	_AFVNC[Carbamidomethyl (C)]DENSR_	P01833	0.975712	0.975712	1.98821e-05	2.73623e-05	116	P01833	PIGR	Polymeric immunoglobulin receptor	PIGR_HUMAN	1	96.6612	1.96661	Dengue	QC	NaN	NaN	NaN	86.5535	0.231657
Dengue / QC	_C[Carbamidomethyl (C)]QHEMDQYWGIGSLASGINLFTNSFEGPVLDHR_	P07358	0.695735	0.695735	1.99789e-05	2.74753e-05	80	P07358	C8B	Complement component C8 beta chain	CO8B_HUMAN	1	61.971	1.61971	Dengue	QC	NaN	NaN	NaN	18.5415	0.139154
Dengue / QC	_SLKYNPVVIDFEMQPIHEVLR_	P07357	0.677779	0.677779	2.01334e-05	2.76742e-05	130	P07357	C8A	Complement component C8 alpha chain	CO8A_HUMAN	1	59.9675	1.59968	Dengue	QC	NaN	NaN	NaN	101.564	0.157431
Dengue / QC	_IDQTVEELRR_	P06727	0.454987	0.454987	2.01991e-05	2.77576e-05	160	P06727	APOA4	Apolipoprotein A-IV	APOA4_HUMAN	1	37.0771	1.37077	Dengue	QC	NaN	NaN	NaN	82.2398	0.099333
Dengue / QC	_IADFELPTIIVPEQTIEIPSIK_	P04114	0.264906	0.264906	2.02866e-05	2.78643e-05	174	P04114	APOB	Apolipoprotein B-100	APOB_HUMAN	1	20.1558	1.20156	Dengue	QC	NaN	NaN	NaN	150.291	0.0620843
Dengue / QC	_VATTVISK_	P05155;P05155-3	1.25612	1.25612	2.03418e-05	2.79196e-05	18	P05155;P05155-3	SERPING1	Plasma protease C1 inhibitor;Isoform 3 of Plasma protease C1 inhibitor	IC1_HUMAN	1	138.853	2.38853	Dengue	QC	NaN	NaN	NaN	5.65894	0.0898475
Dengue / QC	_NMAEQIIQEIYSQIQSK_	A0A0B4J1R6;P29401;P29401-2	1.40697	1.40697	2.03406e-05	2.79196e-05	36	A0A0B4J1R6;P29401;P29401-2	TKT	Transketolase;Transketolase;Isoform 2 of Transketolase	A0A0B4J1R6_HUMAN;TKT_HUMAN;TKT_HUMAN	1	165.18	2.6518	Dengue	QC	NaN	NaN	NaN	16.8515	0.297131
Dengue / QC	_GHFSISIPVK_	P01023	-0.399113	0.399113	2.03827e-05	2.7962e-05	176	P01023	A2M	Alpha-2-macroglobulin	A2MG_HUMAN	1	-24.1676	0.758324	Dengue	QC	NaN	NaN	NaN	115.396	0.0855256
Dengue / QC	_DLATVYVDVLK_	P02647	0.419974	0.419974	2.06178e-05	2.82361e-05	160	P02647	APOA1	Apolipoprotein A-I	APOA1_HUMAN	1	33.7903	1.3379	Dengue	QC	NaN	NaN	NaN	136.476	0.0897879
Dengue / QC	_ALGISPFHEHAEVVFTANDSGPRR_	P02766	0.364106	0.364106	2.06556e-05	2.8281e-05	174	P02766	TTR	Transthyretin	TTHY_HUMAN	1	28.7084	1.28708	Dengue	QC	NaN	NaN	NaN	100.5	0.0721764
Dengue / QC	_RRDGYLFQLLR_	P04196	0.257982	0.257982	2.06823e-05	2.83106e-05	110	P04196	HRG	Histidine-rich glycoprotein	HRG_HUMAN	1	19.5805	1.1958	Dengue	QC	NaN	NaN	NaN	81.6797	0.0797613
Dengue / QC	_VTMSVDTSK_	A0A0C4DH34	-0.396716	0.396716	2.0691e-05	2.83156e-05	168	A0A0C4DH34	IGHV4-28	Immunoglobulin heavy variable 4-28	HV428_HUMAN	1	-24.0415	0.759585	Dengue	QC	NaN	NaN	NaN	59.5197	0.0986575
Dengue / QC	_AQLYIDC[Carbamidomethyl (C)]EK_	P07996	0.578703	0.578703	2.073e-05	2.83621e-05	32	P07996	THBS1	Thrombospondin-1	TSP1_HUMAN	1	49.3506	1.49351	Dengue	QC	NaN	NaN	NaN	17.0118	0.157329
Dengue / QC	_AGFEWNEDGAGTTPSPGLQPAHLTFPLDYHLNQPFIFVLR_	P36955	0.878933	0.878933	2.08433e-05	2.85101e-05	44	P36955	SERPINF1	Pigment epithelium-derived factor	PEDF_HUMAN	1	83.9015	1.83902	Dengue	QC	NaN	NaN	NaN	28.2328	0.198027
Dengue / QC	_GKFC[Carbamidomethyl (C)]EIGSDDC[Carbamidomethyl (C)]YVGDGYSYR_	Q14520;Q14520-2	0.960993	0.960993	2.09002e-05	2.8574e-05	62	Q14520;Q14520-2	HABP2	Hyaluronan-binding protein 2;Isoform 2 of Hyaluronan-binding protein 2	HABP2_HUMAN	1	94.6649	1.94665	Dengue	QC	NaN	NaN	NaN	44.3112	0.181632
Dengue / QC	_MLTPEHVFIHPGWK_	P09871	0.311337	0.311337	2.09538e-05	2.86402e-05	172	P09871	C1S	Complement C1s subcomponent	C1S_HUMAN	1	24.0858	1.24086	Dengue	QC	NaN	NaN	NaN	89.3197	0.0651637
Dengue / QC	_QAPGKGLEWVGFIR_	A0A0A0MS15	-0.587355	0.587355	2.13811e-05	2.91744e-05	158	A0A0A0MS15	IGHV3-49	Immunoglobulin heavy variable 3-49	HV349_HUMAN	1	-33.4438	0.665562	Dengue	QC	NaN	NaN	NaN	49.7223	0.138197
Dengue / QC	_SIAYLQMNSLKTEDTAVYYC[Carbamidomethyl (C)]TR_	A0A0A0MS15	1.35343	1.35343	2.16154e-05	2.94655e-05	40	A0A0A0MS15	IGHV3-49	Immunoglobulin heavy variable 3-49	HV349_HUMAN	1	155.519	2.55519	Dengue	QC	NaN	NaN	NaN	20.0478	0.254848
Dengue / QC	_YLLYYYSDSDKGQGSGVPSR_	A0A075B6J1	0.778991	0.778991	2.17132e-05	2.95701e-05	72	A0A075B6J1	IGLV5-37	Immunoglobulin lambda variable 5-37	LV537_HUMAN	1	71.5931	1.71593	Dengue	QC	NaN	NaN	NaN	52.3192	0.159082
Dengue / QC	_VLSPADKTNVK_	P69905	0.560749	0.560749	2.18628e-05	2.97448e-05	174	P69905	HBA1	Hemoglobin subunit alpha	HBA_HUMAN	1	47.5035	1.47503	Dengue	QC	NaN	NaN	NaN	159.847	0.136183
Dengue / QC	_PSLVPASAENVNK_	Q14624	0.433932	0.433932	2.18588e-05	2.97448e-05	44	Q14624	ITIH4	Inter-alpha-trypsin inhibitor heavy chain H4	ITIH4_HUMAN	1	35.0911	1.35091	Dengue	QC	NaN	NaN	NaN	38.195	0.099102
Dengue / QC	_LLIYGASTR_	P01624	-0.45651	0.45651	2.19355e-05	2.98219e-05	176	P01624	IGKV3-15	Immunoglobulin kappa variable 3-15	KV315_HUMAN	1	-27.1253	0.728747	Dengue	QC	NaN	NaN	NaN	50.908	0.0952811
Dengue / QC	_STSTAYMELSSLR_	P01742	0.418191	0.418191	2.2028e-05	2.99176e-05	126	P01742	IGHV1-69	Immunoglobulin heavy variable 1-69	HV169_HUMAN	1	33.6251	1.33625	Dengue	QC	NaN	NaN	NaN	117.906	0.10767
Dengue / QC	_SIAQYWLGC[Carbamidomethyl (C)]PAPGHL_	P04004	0.421119	0.421119	2.20643e-05	2.99536e-05	176	P04004	VTN	Vitronectin	VTNC_HUMAN	1	33.8966	1.33897	Dengue	QC	NaN	NaN	NaN	106.386	0.0923392
Dengue / QC	_TFPGFFSPM[Oxidation (M)]LGEFVSETESR_	P02671	1.78076	1.78076	2.2093e-05	2.99853e-05	168	P02671	FGA	Fibrinogen alpha chain	FIBA_HUMAN	1	243.607	3.43607	Dengue	QC	NaN	NaN	NaN	80.5726	0.419375
Dengue / QC	_YYTYLIMNK_	P01024	-0.293443	0.293443	2.21292e-05	3.00271e-05	172	P01024	C3	Complement C3	CO3_HUMAN	1	-18.4047	0.815953	Dengue	QC	NaN	NaN	NaN	121.386	0.0657219
Dengue / QC	_FGSGYVSGWGR_	P00740	0.430117	0.430117	2.21677e-05	3.00721e-05	78	P00740	F9	Coagulation factor IX	FA9_HUMAN	1	34.7343	1.34734	Dengue	QC	NaN	NaN	NaN	72.5034	0.0768941
Dengue / QC	_IVVVTAGVR_	P07195	-0.937278	0.937278	2.22372e-05	3.01517e-05	112	P07195	LDHB	L-lactate dehydrogenase B chain	LDHB_HUMAN	1	-47.7783	0.522217	Dengue	QC	NaN	NaN	NaN	96.8028	0.203542
Dengue / QC	_HTFMGVVSLGSPSGEVSHPRK_	P02765	2.03501	2.03501	2.24105e-05	3.0372e-05	34	P02765	AHSG	Alpha-2-HS-glycoprotein	FETUA_HUMAN	1	309.826	4.09826	Dengue	QC	NaN	NaN	NaN	18.1135	0.302833
Dengue / QC	_MFPGVPLDTHDVFQYR_	P14780	2.68083	2.68083	2.24279e-05	3.03879e-05	18	P14780	MMP9	Matrix metalloproteinase-9	MMP9_HUMAN	1	541.225	6.41225	Dengue	QC	NaN	NaN	NaN	10.174	0.336063
Dengue / QC	_YISKYELDK_	P01024	-0.272773	0.272773	2.24955e-05	3.04577e-05	162	P01024	C3	Complement C3	CO3_HUMAN	1	-17.2273	0.827727	Dengue	QC	NaN	NaN	NaN	115.829	0.0754981
Dengue / QC	_NQVAMNPTNTVFDAK_	E9PKE3;P11142	0.822096	0.822096	2.2545e-05	3.05175e-05	14	E9PKE3;P11142	HSPA8	Heat shock cognate 71 kDa protein	E9PKE3_HUMAN;HSP7C_HUMAN	1	76.7972	1.76797	Dengue	QC	NaN	NaN	NaN	8.52679	0.142431
Dengue / QC	_VSITSITVENVFVK_	P01031	0.921665	0.921665	2.28068e-05	3.08126e-05	54	P01031	C5	Complement C5	CO5_HUMAN	1	89.43	1.8943	Dengue	QC	NaN	NaN	NaN	20.4282	0.161987
Dengue / QC	_TATSEYQTFFNPR_	P00734	0.912448	0.912448	2.28203e-05	3.08231e-05	174	P00734	F2	Prothrombin	THRB_HUMAN	1	88.2237	1.88224	Dengue	QC	NaN	NaN	NaN	152.445	0.212701
Dengue / QC	_GLEWVSGVSWNGSR[Methyl (KR)]_	A0A0C4DH35	1.63491	1.63491	2.28447e-05	3.08337e-05	18	A0A0C4DH35	IGHV3-35	Immunoglobulin heavy variable 3-35 (non-functional) (Fragment)	A0A0C4DH35_HUMAN	1	210.567	3.10567	Dengue	QC	NaN	NaN	NaN	12.0872	0.247958
Dengue / QC	_ITINPDTSKNQFSLQLNSVTPEDTAVYYC[Carbamidomethyl (C)]AR_	A0A0B4J1U7	1.40533	1.40533	2.28413e-05	3.08337e-05	24	A0A0B4J1U7	IGHV6-1	Immunoglobulin heavy variable 6-1	HV601_HUMAN	1	164.879	2.64879	Dengue	QC	NaN	NaN	NaN	17.5497	0.329478
Dengue / QC	_TGAVSGHSLK_	H0YAC1;P03952	0.646962	0.646962	2.36925e-05	3.18783e-05	102	H0YAC1;P03952	KLKB1	Plasma kallikrein (Fragment);Plasma kallikrein	H0YAC1_HUMAN;KLKB1_HUMAN	1	56.5867	1.56587	Dengue	QC	NaN	NaN	NaN	54.9665	0.163731
Dengue / QC	_SQIFSTASDNQPTVTIK_	P11021	0.979699	0.979699	2.38853e-05	3.21068e-05	26	P11021	HSPA5	78 kDa glucose-regulated protein	GRP78_HUMAN	1	97.2054	1.97205	Dengue	QC	NaN	NaN	NaN	14.8074	0.272115
Dengue / QC	_SQVVLTMTNMDPVDTATYYC[Carbamidomethyl (C)]AR_	A0A0B4J1V2	1.57251	1.57251	2.39641e-05	3.2205e-05	92	A0A0B4J1V2	IGHV2-26	Immunoglobulin heavy variable 2-26	HV226_HUMAN	1	197.422	2.97422	Dengue	QC	NaN	NaN	NaN	44.841	0.248918
Dengue / QC	_AVSNEIVRFPTDQLTPDQER_	P05164;P05164-2;P05164-3	0.764816	0.764816	2.41098e-05	3.2393e-05	56	P05164;P05164-2;P05164-3	MPO	Myeloperoxidase;Isoform H14 of Myeloperoxidase;Isoform H7 of Myeloperoxidase	PERM_HUMAN	1	69.9154	1.69915	Dengue	QC	NaN	NaN	NaN	26.1544	0.184924
Dengue / QC	_TTGIVM[Oxidation (M)]DSGDGVTHTVPIYEGYALPHAILR_	P60709	0.488947	0.488947	2.41761e-05	3.24743e-05	16	P60709	ACTB	Actin, cytoplasmic 1	ACTB_HUMAN	1	40.342	1.40342	Dengue	QC	NaN	NaN	NaN	4.90847	0.446887
Dengue / QC	_KPDVSHGEM[Oxidation (M)]VSGFGPIYNYK_	P04003	2.06075	2.06075	2.4354e-05	3.2682e-05	18	P04003	C4BPA	C4b-binding protein alpha chain	C4BPA_HUMAN	1	317.202	4.17202	Dengue	QC	NaN	NaN	NaN	10.3531	0.138133
Dengue / QC	_WLQGSQELPREK_	A0A0G2JMB2	-0.515595	0.515595	2.44788e-05	3.2818e-05	176	A0A0G2JMB2	IGHA2	Immunoglobulin heavy constant alpha 2 (Fragment)	A0A0G2JMB2_HUMAN	1	-30.0496	0.699504	Dengue	QC	NaN	NaN	NaN	76.0671	0.114509
Dengue / QC	_MHSM[Oxidation (M)]NGFMYGNQPGLTMC[Carbamidomethyl (C)]K_	P00450	0.457901	0.457901	2.45475e-05	3.28864e-05	22	P00450	CP	Ceruloplasmin	CERU_HUMAN	1	37.3542	1.37354	Dengue	QC	NaN	NaN	NaN	13.9503	0.166209
Dengue / QC	_SNLC[Carbamidomethyl (C)]ALC[Carbamidomethyl (C)]IGDEQGENKC[Carbamidomethyl (C)]VPNSNER_	E7ER44;P02788	1.16206	1.16206	2.45728e-05	3.29108e-05	18	E7ER44;P02788	LTF	Lactotransferrin	E7ER44_HUMAN;TRFL_HUMAN	1	123.777	2.23777	Dengue	QC	NaN	NaN	NaN	12.2133	0.255621
Dengue / QC	_FLEPFDIDDHQQVHC[Carbamidomethyl (C)]PYDQLQIYANGK_	B4DPQ0	0.333253	0.333253	2.4642e-05	3.29894e-05	142	B4DPQ0	C1R	Complement C1r subcomponent	B4DPQ0_HUMAN	1	25.9851	1.25985	Dengue	QC	NaN	NaN	NaN	79.417	0.0733865
Dengue / QC	_KVSPHSGVVALTKPVPEPR_	P23142-4	0.786058	0.786058	2.48478e-05	3.32411e-05	84	P23142-4	FBLN1	Isoform C of Fibulin-1	FBLN1_HUMAN	1	72.4356	1.72436	Dengue	QC	NaN	NaN	NaN	69.1716	0.14634
Dengue / QC	_VIGSGC[Carbamidomethyl (C)]NLDSAR_	P00338;P00338-3	-0.661268	0.661268	2.50913e-05	3.35348e-05	104	P00338;P00338-3	LDHA	L-lactate dehydrogenase A chain;Isoform 3 of L-lactate dehydrogenase A chain	LDHA_HUMAN	1	-36.7678	0.632322	Dengue	QC	NaN	NaN	NaN	87.7279	0.179648
Dengue / QC	_SEFPESWLWNVEDLKEPPK_	P01024	0.251145	0.251145	2.51296e-05	3.3578e-05	150	P01024	C3	Complement C3	CO3_HUMAN	1	19.0152	1.19015	Dengue	QC	NaN	NaN	NaN	103.472	0.0729878
Dengue / QC	_LVTDLTK_	P02768	-0.331211	0.331211	2.55238e-05	3.40317e-05	176	P02768	ALB	Serum albumin	ALBU_HUMAN	1	-20.5131	0.794869	Dengue	QC	NaN	NaN	NaN	46.1072	0.0749403
Dengue / QC	_TEDSSSFLIDK_	P05543	0.47307	0.47307	2.56035e-05	3.41299e-05	38	P05543	SERPINA7	Thyroxine-binding globulin	THBG_HUMAN	1	38.8061	1.38806	Dengue	QC	NaN	NaN	NaN	33.5528	0.109426
Dengue / QC	_SSSGLTYIAEWK_	P33908	0.982408	0.982408	2.57369e-05	3.42913e-05	24	P33908	MAN1A1	Mannosyl-oligosaccharide 1,2-alpha-mannosidase IA	MA1A1_HUMAN	1	97.5761	1.97576	Dengue	QC	NaN	NaN	NaN	6.81612	0.0970828
Dengue / QC	_SSFQVTTC[Carbamidomethyl (C)]K_	P03950	0.714468	0.714468	2.58429e-05	3.44162e-05	66	P03950	ANG	Angiogenin	ANGI_HUMAN	1	64.0878	1.64088	Dengue	QC	NaN	NaN	NaN	60.6189	0.136831
Dengue / QC	_TLNQPDSQLQLTTGNGLFLSEGLK_	P01009	0.373337	0.373337	2.59689e-05	3.45758e-05	144	P01009	SERPINA1	Alpha-1-antitrypsin	A1AT_HUMAN	1	29.5346	1.29535	Dengue	QC	NaN	NaN	NaN	139.664	0.0997702
Dengue / QC	_QVC[Carbamidomethyl (C)]TDINEC[Carbamidomethyl (C)]ETGQHNC[Carbamidomethyl (C)]VPNSVC[Carbamidomethyl (C)]INTR_	G3XAP6;P49747	1.08336	1.08336	2.60497e-05	3.46546e-05	32	G3XAP6;P49747	COMP	Cartilage oligomeric matrix protein	G3XAP6_HUMAN;COMP_HUMAN	1	111.896	2.11896	Dengue	QC	NaN	NaN	NaN	25.3972	0.249578
Dengue / QC	_SC[Carbamidomethyl (C)]VNAIPDQC[Carbamidomethyl (C)]SPLPC[Carbamidomethyl (C)]NEDGYMSC[Carbamidomethyl (C)]KDGK_	P07225	0.497029	0.497029	2.6092e-05	3.46985e-05	172	P07225	PROS1	Vitamin K-dependent protein S	PROS_HUMAN	1	41.1304	1.4113	Dengue	QC	NaN	NaN	NaN	159.881	0.100632
Dengue / QC	_TVTINC[Carbamidomethyl (C)]PFKTENAQK_	P01833	1.34959	1.34959	2.61505e-05	3.47681e-05	22	P01833	PIGR	Polymeric immunoglobulin receptor	PIGR_HUMAN	1	154.84	2.5484	Dengue	QC	NaN	NaN	NaN	14.9615	0.235924
Dengue / QC	_YGM[Oxidation (M)]VAQVTQTLK_	P04114	2.4291	2.4291	2.62497e-05	3.48751e-05	56	P04114	APOB	Apolipoprotein B-100	APOB_HUMAN	1	438.557	5.38557	Dengue	QC	NaN	NaN	NaN	24.5386	0.244536
Dengue / QC	_TVVQPSVGAAAGPVVPPC[Carbamidomethyl (C)]PGR_	P02765	0.398035	0.398035	2.64788e-05	3.51545e-05	176	P02765	AHSG	Alpha-2-HS-glycoprotein	FETUA_HUMAN	1	31.7712	1.31771	Dengue	QC	NaN	NaN	NaN	163.282	0.0869735
Dengue / QC	_HSTIFENLANK_	P02787	-0.318789	0.318789	2.65742e-05	3.52728e-05	176	P02787	TF	Serotransferrin	TRFE_HUMAN	1	-19.8257	0.801743	Dengue	QC	NaN	NaN	NaN	102.739	0.0650967
Dengue / QC	_VVWC[Carbamidomethyl (C)]AVGEQELR_	E7ER44;P02788	1.18468	1.18468	2.70413e-05	3.58419e-05	64	E7ER44;P02788	LTF	Lactotransferrin	E7ER44_HUMAN;TRFL_HUMAN	1	127.312	2.27312	Dengue	QC	NaN	NaN	NaN	43.2377	0.241833
Dengue / QC	_SC[Carbamidomethyl (C)]AVAEYGVYVK_	P00738	0.356867	0.356867	2.71949e-05	3.60284e-05	176	P00738	HP	Haptoglobin	HPT_HUMAN	1	28.0642	1.28064	Dengue	QC	NaN	NaN	NaN	118.274	0.0961197
Dengue / QC	_VVLSSGSGPGLDLPLVLGLPLQLK_	I3L145;P04278	0.662562	0.662562	2.72162e-05	3.60481e-05	126	I3L145;P04278	SHBG	Sex hormone-binding globulin	I3L145_HUMAN;SHBG_HUMAN	1	58.2891	1.58289	Dengue	QC	NaN	NaN	NaN	108.703	0.164083
Dengue / QC	_FDSDAASQR_	P05534;P30447	2.85594	2.85594	2.7286e-05	3.61321e-05	18	P05534;P30447	HLA-A	HLA class I histocompatibility antigen, A-24 alpha chain;HLA class I histocompatibility antigen, A-23 alpha chain	1A24_HUMAN;1A23_HUMAN	1	623.974	7.23974	Dengue	QC	NaN	NaN	NaN	6.72275	0.247111
Dengue / QC	_SVTLNQR_	G3XAK1;P26927	0.500871	0.500871	2.7415e-05	3.62857e-05	50	G3XAK1;P26927	MST1	Hepatocyte growth factor-like protein	G3XAK1_HUMAN;HGFL_HUMAN	1	41.5067	1.41507	Dengue	QC	NaN	NaN	NaN	19.2156	0.0919694
Dengue / QC	_NGIDIYSLTVDSR_	Q14624	0.487005	0.487005	2.77013e-05	3.66473e-05	68	Q14624	ITIH4	Inter-alpha-trypsin inhibitor heavy chain H4	ITIH4_HUMAN	1	40.1533	1.40153	Dengue	QC	NaN	NaN	NaN	35.5693	0.12432
Dengue / QC	_ASQSVSSYLAWYQQKPGQAPR_	P04433	-0.682225	0.682225	2.78025e-05	3.67623e-05	176	P04433	IGKV3-11	Immunoglobulin kappa variable 3-11	KV311_HUMAN	1	-37.6796	0.623204	Dengue	QC	NaN	NaN	NaN	43.4652	0.137265
Dengue / QC	_SPC[Carbamidomethyl (C)]YGYQWVSEEHEEAHHTAYLVFSPSK_	P01023	-0.514942	0.514942	2.7842e-05	3.67987e-05	172	P01023	A2M	Alpha-2-macroglobulin	A2MG_HUMAN	1	-30.0179	0.699821	Dengue	QC	NaN	NaN	NaN	57.8973	0.111523
Dengue / QC	_LRQNADQC[Carbamidomethyl (C)]C[Carbamidomethyl (C)]PEYEC[Carbamidomethyl (C)]VC[Carbamidomethyl (C)]DPVSC[Carbamidomethyl (C)]DLPPVPHC[Carbamidomethyl (C)]ER_	P04275	0.757066	0.757066	2.79511e-05	3.69169e-05	78	P04275	VWF	von Willebrand factor	VWF_HUMAN	1	69.005	1.69005	Dengue	QC	NaN	NaN	NaN	59.358	0.1737
Dengue / QC	_EHVAHLLFLRDTK_	P19652	1.56446	1.56446	2.80016e-05	3.69661e-05	54	P19652	ORM2	Alpha-1-acid glycoprotein 2	A1AG2_HUMAN	1	195.768	2.95768	Dengue	QC	NaN	NaN	NaN	20.0798	0.231117
Dengue / QC	_HTLNQIDEVKVWPQQPSGELFEIEIDTLETTC[Carbamidomethyl (C)]HVLDPTPVAR_	P02765	0.694482	0.694482	2.81377e-05	3.71195e-05	164	P02765	AHSG	Alpha-2-HS-glycoprotein	FETUA_HUMAN	1	61.8303	1.6183	Dengue	QC	NaN	NaN	NaN	66.2529	0.125562
Dengue / QC	_GGTLGTPQTGSENDALYEYLR_	E9PHK0;P05452	0.832695	0.832695	2.81771e-05	3.7154e-05	172	E9PHK0;P05452	CLEC3B	Tetranectin	E9PHK0_HUMAN;TETN_HUMAN	1	78.1009	1.78101	Dengue	QC	NaN	NaN	NaN	79.9687	0.0963397
Dengue / QC	_SC[Carbamidomethyl (C)]GLHQLLR[Methyl (KR)]GPEVQLVAHSPWLKDSLSR_	P0C0L5	2.16139	2.16139	2.85607e-05	3.75891e-05	36	P0C0L5	C4B	Complement C4-B	CO4B_HUMAN	1	347.345	4.47345	Dengue	QC	NaN	NaN	NaN	15.5268	0.351198
Dengue / QC	_ATAVVDGAFK_	P32119	0.850202	0.850202	2.87362e-05	3.77935e-05	36	P32119	PRDX2	Peroxiredoxin-2	PRDX2_HUMAN	1	80.2753	1.80275	Dengue	QC	NaN	NaN	NaN	13.3692	0.228856
Dengue / QC	_WYQMGIVSWGEGC[Carbamidomethyl (C)]DR_	P00734	0.470589	0.470589	2.89922e-05	3.81033e-05	114	P00734	F2	Prothrombin	THRB_HUMAN	1	38.5675	1.38568	Dengue	QC	NaN	NaN	NaN	51.8805	0.114162
Dengue / QC	_LSLEIEQLELQRDSAR_	P04003	1.22383	1.22383	2.91703e-05	3.83049e-05	44	P04003	C4BPA	C4b-binding protein alpha chain	C4BPA_HUMAN	1	133.567	2.33567	Dengue	QC	NaN	NaN	NaN	23.0635	0.196073
Dengue / QC	_PKNPANPVQR_	P00738	0.901929	0.901929	2.95259e-05	3.87139e-05	32	P00738	HP	Haptoglobin	HPT_HUMAN	1	86.8563	1.86856	Dengue	QC	NaN	NaN	NaN	23.2893	0.2273
Dengue / QC	_AGC[Carbamidomethyl (C)]VAESTAVC[Carbamidomethyl (C)]R_	Q9Y6R7	0.974007	0.974007	2.9909e-05	3.91488e-05	88	Q9Y6R7	FCGBP	IgGFc-binding protein	FCGBP_HUMAN	1	96.4289	1.96429	Dengue	QC	NaN	NaN	NaN	40.9296	0.383006
Dengue / QC	_ARPHAWPFMVSLQLR_	P08246	1.54374	1.54374	3.06978e-05	4.0091e-05	52	P08246	ELANE	Neutrophil elastase	ELNE_HUMAN	1	191.549	2.91549	Dengue	QC	NaN	NaN	NaN	30.1368	0.397386
Dengue / QC	_SLGPALLLLQK_	P14780	1.20657	1.20657	3.08591e-05	4.02642e-05	88	P14780	MMP9	Matrix metalloproteinase-9	MMP9_HUMAN	1	130.788	2.30788	Dengue	QC	NaN	NaN	NaN	54.3129	0.260167
Dengue / QC	_SDIAPVAR_	P01023	-0.395981	0.395981	3.08816e-05	4.02747e-05	168	P01023	A2M	Alpha-2-macroglobulin	A2MG_HUMAN	1	-24.0028	0.759972	Dengue	QC	NaN	NaN	NaN	89.3469	0.0909249
Dengue / QC	_ATGVLYDYVNK_	P04114	0.864336	0.864336	3.08762e-05	4.02747e-05	32	P04114	APOB	Apolipoprotein B-100	APOB_HUMAN	1	82.0502	1.8205	Dengue	QC	NaN	NaN	NaN	12.794	0.141694
Dengue / QC	_GFYFSRPASR_	P01344;P01344-3	0.324329	0.324329	3.09136e-05	4.03071e-05	136	P01344;P01344-3	IGF2	Insulin-like growth factor II;Isoform 3 of Insulin-like growth factor II	IGF2_HUMAN	1	25.2082	1.25208	Dengue	QC	NaN	NaN	NaN	56.987	0.0847838
Dengue / QC	_GLEWMGGFDPEDGETIYAQK_	A0A0C4DH33	0.876415	0.876415	3.12451e-05	4.07014e-05	50	A0A0C4DH33	IGHV1-24	Immunoglobulin heavy variable 1-24	HV124_HUMAN	1	83.5808	1.83581	Dengue	QC	NaN	NaN	NaN	41.8539	0.229874
Dengue / QC	_TVAAPSVFIFPPSDEQLK_	P01834	-0.490869	0.490869	3.1385e-05	4.08551e-05	176	P01834	IGKC	Immunoglobulin kappa constant	IGKC_HUMAN	1	-28.8404	0.711596	Dengue	QC	NaN	NaN	NaN	66.9888	0.0987907
Dengue / QC	_FGFC[Carbamidomethyl (C)]PMAAHEEIC[Carbamidomethyl (C)]TTNEGVMYR_	P02751;P02751-15;P02751-3;P02751-7	0.422079	0.422079	3.14767e-05	4.09651e-05	158	P02751;P02751-15;P02751-3;P02751-7	FN1	Fibronectin;Isoform 15 of Fibronectin;Isoform 3 of Fibronectin;Isoform 7 of Fibronectin	FINC_HUMAN	1	33.9857	1.33986	Dengue	QC	NaN	NaN	NaN	138.989	0.0823051
Dengue / QC	_NQEAC[Carbamidomethyl (C)]ELSNN_	O95445	0.53288	0.53288	3.14997e-05	4.09849e-05	146	O95445	APOM	Apolipoprotein M	APOM_HUMAN	1	44.6814	1.44681	Dengue	QC	NaN	NaN	NaN	99.2315	0.10908
Dengue / QC	_YLYEIARR_	P02768	-0.315877	0.315877	3.15623e-05	4.10384e-05	176	P02768	ALB	Serum albumin	ALBU_HUMAN	1	-19.6637	0.803363	Dengue	QC	NaN	NaN	NaN	46.7183	0.0734826
Dengue / QC	_HRGVYSSDVFDIFPGTYQTLEMFPR_	P00450	0.710921	0.710921	3.17079e-05	4.11654e-05	174	P00450	CP	Ceruloplasmin	CERU_HUMAN	1	63.6849	1.63685	Dengue	QC	NaN	NaN	NaN	139.128	0.11935
Dengue / QC	_SQC[Carbamidomethyl (C)]TYSNPEGTVVLAC[Carbamidomethyl (C)]DQAQC[Carbamidomethyl (C)]R_	P22792	0.382055	0.382055	3.18065e-05	4.12793e-05	176	P22792	CPN2	Carboxypeptidase N subunit 2	CPN2_HUMAN	1	30.3197	1.3032	Dengue	QC	NaN	NaN	NaN	119.496	0.0781066
Dengue / QC	_GATDNKGPVLAWINAVSAFR_	Q96KN2	0.543272	0.543272	3.19252e-05	4.14237e-05	62	Q96KN2	CNDP1	Beta-Ala-His dipeptidase	CNDP1_HUMAN	1	45.7274	1.45727	Dengue	QC	NaN	NaN	NaN	50.3122	0.0969752
Dengue / QC	_SSPVVIDASTAIDAPSNLR_	P02751;P02751-15;P02751-3;P02751-7	0.180854	0.180854	3.19914e-05	4.15e-05	176	P02751;P02751-15;P02751-3;P02751-7	FN1	Fibronectin;Isoform 15 of Fibronectin;Isoform 3 of Fibronectin;Isoform 7 of Fibronectin	FINC_HUMAN	1	13.3555	1.13355	Dengue	QC	NaN	NaN	NaN	153.746	0.0699167
Dengue / QC	_WIYHLTEGSTDLRTEGRPDMK_	O95445	0.688883	0.688883	3.20705e-05	4.15929e-05	42	O95445	APOM	Apolipoprotein M	APOM_HUMAN	1	61.2035	1.61203	Dengue	QC	NaN	NaN	NaN	27.2249	0.128388
Dengue / QC	_EC[Carbamidomethyl (C)]SKLPLRITYYHLSFPTNIQAPAVVFR_	P23142-4	1.13623	1.13623	3.21746e-05	4.17167e-05	52	P23142-4	FBLN1	Isoform C of Fibulin-1	FBLN1_HUMAN	1	119.807	2.19807	Dengue	QC	NaN	NaN	NaN	44.3254	0.235557
Dengue / QC	_LLIYDASNLETGVPSR[Methyl (KR)]_	P01593;P01594	1.34964	1.34964	3.22139e-05	4.175e-05	50	P01593;P01594	IGKV1D-33;IGKV1-33	Immunoglobulin kappa variable 1D-33;Immunoglobulin kappa variable 1-33	KVD33_HUMAN;KV133_HUMAN	1	154.848	2.54848	Dengue	QC	NaN	NaN	NaN	30.5669	0.253131
Dengue / QC	_SHC[Carbamidomethyl (C)]IAEVENDEMPADLPSLAADFVESKDVC[Carbamidomethyl (C)]KNYAEAK_	P02768	1.23612	1.23612	3.22659e-05	4.18077e-05	166	P02768	ALB	Serum albumin	ALBU_HUMAN	1	135.564	2.35564	Dengue	QC	NaN	NaN	NaN	133.433	0.264522
Dengue / QC	_FNRPFLMIIVPTDTQNIFFMSKVTNPK_	P01011	0.956997	0.956997	3.23634e-05	4.19243e-05	82	P01011	SERPINA3	Alpha-1-antichymotrypsin	AACT_HUMAN	1	94.1265	1.94126	Dengue	QC	NaN	NaN	NaN	51.8118	0.217646
Dengue / QC	_RDTMVEDLVVLVR_	P07358	0.788213	0.788213	3.35372e-05	4.33246e-05	16	P07358	C8B	Complement component C8 beta chain	CO8B_HUMAN	1	72.6934	1.72693	Dengue	QC	NaN	NaN	NaN	10.4556	0.244603
Dengue / QC	_FSGSLLGGK_	P04211	-0.406889	0.406889	3.35571e-05	4.33304e-05	174	P04211	IGLV7-43	Immunoglobulin lambda variable 7-43	LV743_HUMAN	1	-24.5752	0.754248	Dengue	QC	NaN	NaN	NaN	71.0506	0.0865004
Dengue / QC	_NWGLGGHAFC[Carbamidomethyl (C)]R_	P00748	-0.248726	0.248726	3.45335e-05	4.45297e-05	142	P00748	F12	Coagulation factor XII	FA12_HUMAN	1	-15.8361	0.841639	Dengue	QC	NaN	NaN	NaN	88.937	0.0618945
Dengue / QC	_YIYGKPVQGVAYVR_	P0C0L5	-0.305724	0.305724	3.49995e-05	4.50683e-05	176	P0C0L5	C4B	Complement C4-B	CO4B_HUMAN	1	-19.0964	0.809036	Dengue	QC	NaN	NaN	NaN	110.552	0.0615957
Dengue / QC	_ADDKETC[Carbamidomethyl (C)]FAEEGK_	P02768	-0.421412	0.421412	3.51152e-05	4.5204e-05	164	P02768	ALB	Serum albumin	ALBU_HUMAN	1	-25.3307	0.746693	Dengue	QC	NaN	NaN	NaN	55.6618	0.0872994
Dengue / QC	_GDSGGAFAVQDPNDKTK_	P09871	0.459766	0.459766	3.5121e-05	4.5204e-05	76	P09871	C1S	Complement C1s subcomponent	C1S_HUMAN	1	37.5318	1.37532	Dengue	QC	NaN	NaN	NaN	37.2089	0.122089
Dengue / QC	_TYETTLEKC[Carbamidomethyl (C)]C[Carbamidomethyl (C)]AAADPHEC[Carbamidomethyl (C)]YAK_	P02768	1.3607	1.3607	3.54421e-05	4.55649e-05	176	P02768	ALB	Serum albumin	ALBU_HUMAN	1	156.81	2.5681	Dengue	QC	NaN	NaN	NaN	135.755	0.272563
Dengue / QC	_VAEGTQVLELPFKGDDITM[Oxidation (M)]VLILPKPEK_	P01008	1.0668	1.0668	3.57104e-05	4.58425e-05	170	P01008	SERPINC1	Antithrombin-III	ANT3_HUMAN	1	109.478	2.09478	Dengue	QC	NaN	NaN	NaN	109.911	0.206462
Dengue / QC	_PTKEDVYVVGTVLR_	P04003	0.338148	0.338148	3.57152e-05	4.58425e-05	64	P04003	C4BPA	C4b-binding protein alpha chain	C4BPA_HUMAN	1	26.4133	1.26413	Dengue	QC	NaN	NaN	NaN	52.7172	0.0852997
Dengue / QC	_TEQAAVAR_	P00748	0.564259	0.564259	3.61885e-05	4.6418e-05	150	P00748	F12	Coagulation factor XII	FA12_HUMAN	1	47.8628	1.47863	Dengue	QC	NaN	NaN	NaN	55.4441	0.11574
Dengue / QC	_GFYPSDIAVEWESNGQPENNYKTTPPVLDSDGSFFLYSK_	P01857	2.24005	2.24005	3.63066e-05	4.65482e-05	14	P01857	IGHG1	Immunoglobulin heavy constant gamma 1	IGHG1_HUMAN	1	372.413	4.72413	Dengue	QC	NaN	NaN	NaN	8.52374	0.355061
Dengue / QC	_AQTTVTC[Carbamidomethyl (C)]M[Oxidation (M)]ENGWSPTPR_	P08603	0.969387	0.969387	3.6525e-05	4.68068e-05	118	P08603	CFH	Complement factor H	CFAH_HUMAN	1	95.8009	1.95801	Dengue	QC	NaN	NaN	NaN	95.3852	0.152696
Dengue / QC	_LTVGAAQVPAQLLVGALRVLAYSR_	P08571	1.08415	1.08415	3.69789e-05	4.73236e-05	50	P08571	CD14	Monocyte differentiation antigen CD14	CD14_HUMAN	1	112.012	2.12012	Dengue	QC	NaN	NaN	NaN	29.4383	0.136714
Dengue / QC	_IWDVVEK_	P01024	-0.233674	0.233674	3.77166e-05	4.82044e-05	176	P01024	C3	Complement C3	CO3_HUMAN	1	-14.9533	0.850467	Dengue	QC	NaN	NaN	NaN	64.6085	0.0536873
Dengue / QC	_TYTC[Carbamidomethyl (C)]NVDHKPSNTK_	P01861	0.457708	0.457708	3.78664e-05	4.83723e-05	176	P01861	IGHG4	Immunoglobulin heavy constant gamma 4	IGHG4_HUMAN	1	37.3358	1.37336	Dengue	QC	NaN	NaN	NaN	154.884	0.115576
Dengue / QC	_C[Carbamidomethyl (C)]VEISC[Carbamidomethyl (C)]KSPDVINGSPISQK_	P08603	0.679943	0.679943	3.7874e-05	4.83723e-05	156	P08603	CFH	Complement factor H	CFAH_HUMAN	1	60.2077	1.60208	Dengue	QC	NaN	NaN	NaN	142.43	0.133918
Dengue / QC	_QIQVSWLR_	P01871	-0.355159	0.355159	3.80146e-05	4.85296e-05	174	P01871	IGHM	Immunoglobulin heavy constant mu	IGHM_HUMAN	1	-21.8217	0.781783	Dengue	QC	NaN	NaN	NaN	100.524	0.0846693
Dengue / QC	_ENLDRDIALMK_	P00734	-0.285287	0.285287	3.81713e-05	4.8705e-05	170	P00734	F2	Prothrombin	THRB_HUMAN	1	-17.9422	0.820578	Dengue	QC	NaN	NaN	NaN	102.912	0.0595615
Dengue / QC	_VTM[Oxidation (M)]TTDTSTSTAYMELR_	A0A0C4DH31	1.12756	1.12756	3.86261e-05	4.92403e-05	58	A0A0C4DH31	IGHV1-18	Immunoglobulin heavy variable 1-18	HV118_HUMAN	1	118.489	2.18489	Dengue	QC	NaN	NaN	NaN	39.7014	0.249086
Dengue / QC	_TSSSFEVR_	I3L145;P04278	0.630035	0.630035	3.88552e-05	4.94986e-05	108	I3L145;P04278	SHBG	Sex hormone-binding globulin	I3L145_HUMAN;SHBG_HUMAN	1	54.7602	1.5476	Dengue	QC	NaN	NaN	NaN	103.553	0.129642
Dengue / QC	_LDNIYSSDK_	P04114	0.492057	0.492057	3.9008e-05	4.96595e-05	64	P04114	APOB	Apolipoprotein B-100	APOB_HUMAN	1	40.6449	1.40645	Dengue	QC	NaN	NaN	NaN	49.1154	0.086644
Dengue / QC	_TRKGNVATEISTER_	P04114	1.55644	1.55644	3.91247e-05	4.97854e-05	52	P04114	APOB	Apolipoprotein B-100	APOB_HUMAN	1	194.128	2.94128	Dengue	QC	NaN	NaN	NaN	26.8191	0.245003
Dengue / QC	_TLM[Oxidation (M)]FGSYLDDEKNWGLSFYADKPETTK_	P19652	0.353577	0.353577	3.94827e-05	5.01953e-05	152	P19652	ORM2	Alpha-1-acid glycoprotein 2	A1AG2_HUMAN	1	27.7725	1.27772	Dengue	QC	NaN	NaN	NaN	83.3998	0.177388
Dengue / QC	_VYAC[Carbamidomethyl (C)]EVTHQGLSSPVTKSFNRGEC[Carbamidomethyl (C)]_	P01834	0.84199	0.84199	4.02493e-05	5.10888e-05	84	P01834	IGKC	Immunoglobulin kappa constant	IGKC_HUMAN	1	79.2521	1.79252	Dengue	QC	NaN	NaN	NaN	61.6277	0.155895
Dengue / QC	_IYGKWYNLAIGSTC[Carbamidomethyl (C)]PWLK_	P02760	1.47412	1.47412	4.02759e-05	5.10897e-05	20	P02760	AMBP	Protein AMBP	AMBP_HUMAN	1	177.814	2.77814	Dengue	QC	NaN	NaN	NaN	14.5404	0.286223
Dengue / QC	_ENADSLQASLRPHADELK_	P06727	0.350516	0.350516	4.04002e-05	5.11992e-05	140	P06727	APOA4	Apolipoprotein A-IV	APOA4_HUMAN	1	27.5016	1.27502	Dengue	QC	NaN	NaN	NaN	98.4637	0.0904141
Dengue / QC	_TIYTPGSTVLYRIFTVNHKLLPVGR_	P01024	0.610234	0.610234	4.06696e-05	5.15173e-05	160	P01024	C3	Complement C3	CO3_HUMAN	1	52.6507	1.52651	Dengue	QC	NaN	NaN	NaN	107.86	0.118152
Dengue / QC	_LQETSNWLLSQQQADGSFQDPC[Carbamidomethyl (C)]PVLDR_	A0A140TA49	0.391625	0.391625	4.10864e-05	5.20217e-05	134	A0A140TA49	C4A	Complement C4-A	A0A140TA49_HUMAN	1	31.1871	1.31187	Dengue	QC	NaN	NaN	NaN	125.266	0.102907
Dengue / QC	_ASGYTFTSYAMHWVR_	A0A0C4DH29	2.13345	2.13345	4.13757e-05	5.23172e-05	48	A0A0C4DH29	IGHV1-3	Immunoglobulin heavy variable 1-3	HV103_HUMAN	1	338.765	4.38765	Dengue	QC	NaN	NaN	NaN	28.0961	0.462621
Dengue / QC	_RSVAVYGQYGGQPC[Carbamidomethyl (C)]VGNAFETQSC[Carbamidomethyl (C)]EPTR_	P10643	0.442816	0.442816	4.23102e-05	5.34264e-05	86	P10643	C7	Complement component C7	CO7_HUMAN	1	35.9255	1.35926	Dengue	QC	NaN	NaN	NaN	80.1833	0.130643
Dengue / QC	_SFRPFVPR_	P18428	0.652144	0.652144	4.2426e-05	5.35484e-05	96	P18428	LBP	Lipopolysaccharide-binding protein	LBP_HUMAN	1	57.1502	1.5715	Dengue	QC	NaN	NaN	NaN	90.3009	0.167982
Dengue / QC	_FSGSGAGTDFTLK[Methyl (KR)]_	A0A0C4DH68	0.818468	0.818468	4.25133e-05	5.36345e-05	44	A0A0C4DH68	IGKV2-24	Immunoglobulin kappa variable 2-24	KV224_HUMAN	1	76.3533	1.76353	Dengue	QC	NaN	NaN	NaN	30.3748	0.155148
Dengue / QC	_DLDMFINASK_	O75882;O75882-2;O75882-3	0.455784	0.455784	4.28345e-05	5.40154e-05	20	O75882;O75882-2;O75882-3	ATRN	Attractin;Isoform 2 of Attractin;Isoform 3 of Attractin	ATRN_HUMAN	1	37.1528	1.37153	Dengue	QC	NaN	NaN	NaN	9.66357	0.111151
Dengue / QC	_FQLFGSPSGQK_	E7ER44;P02788	1.32766	1.32766	4.28666e-05	5.40437e-05	36	E7ER44;P02788	LTF	Lactotransferrin	E7ER44_HUMAN;TRFL_HUMAN	1	150.995	2.50995	Dengue	QC	NaN	NaN	NaN	29.0901	0.288315
Dengue / QC	_YLRTEHGSEMLFFGNAIEGK_	P04114	0.492863	0.492863	4.33179e-05	5.45391e-05	76	P04114	APOB	Apolipoprotein B-100	APOB_HUMAN	1	40.7235	1.40723	Dengue	QC	NaN	NaN	NaN	64.5353	0.123735
Dengue / QC	_M[Oxidation (M)]RPSTDTITVMVENSHGLR_	P0C0L5	0.47908	0.47908	4.36345e-05	5.49131e-05	148	P0C0L5	C4B	Complement C4-B	CO4B_HUMAN	1	39.3855	1.39385	Dengue	QC	NaN	NaN	NaN	128.276	0.0917921
Dengue / QC	_MESLGITSR_	P07357	-0.233025	0.233025	4.39537e-05	5.52403e-05	176	P07357	C8A	Complement component C8 alpha chain	CO8A_HUMAN	1	-14.9151	0.850849	Dengue	QC	NaN	NaN	NaN	72.9232	0.0566661
Dengue / QC	_GLEEELQFSLGSK_	P0C0L5	0.506995	0.506995	4.41061e-05	5.54026e-05	164	P0C0L5	C4B	Complement C4-B	CO4B_HUMAN	1	42.1087	1.42109	Dengue	QC	NaN	NaN	NaN	121.643	0.0940212
Dengue / QC	_SDTSLTWNSVK_	E7ER44;P02788	1.30346	1.30346	4.41782e-05	5.54727e-05	54	E7ER44;P02788	LTF	Lactotransferrin	E7ER44_HUMAN;TRFL_HUMAN	1	146.821	2.46821	Dengue	QC	NaN	NaN	NaN	30.1805	0.275952
Dengue / QC	_VAAGAFQGLR_	P02750	-0.313515	0.313515	4.47345e-05	5.60958e-05	170	P02750	LRG1	Leucine-rich alpha-2-glycoprotein	A2GL_HUMAN	1	-19.5321	0.804679	Dengue	QC	NaN	NaN	NaN	108.671	0.0815527
Dengue / QC	_TC[Carbamidomethyl (C)]RVEC[Carbamidomethyl (C)]SDNLFTQR_	P48740	1.2918	1.2918	4.50929e-05	5.65199e-05	22	P48740	MASP1	Mannan-binding lectin serine protease 1	MASP1_HUMAN	1	144.834	2.44834	Dengue	QC	NaN	NaN	NaN	17.373	0.378073
Dengue / QC	_AITPPHPASQANIIFDITEGNLR_	P23142	0.475005	0.475005	4.55739e-05	5.70845e-05	154	P23142	FBLN1	Fibulin-1	FBLN1_HUMAN	1	38.9923	1.38992	Dengue	QC	NaN	NaN	NaN	117.936	0.0983683
Dengue / QC	_QPSSAFAAFVK_	P01024	-0.340937	0.340937	4.61398e-05	5.77417e-05	164	P01024	C3	Complement C3	CO3_HUMAN	1	-21.0471	0.789529	Dengue	QC	NaN	NaN	NaN	102.938	0.0708778
Dengue / QC	_C[Carbamidomethyl (C)]GLVPVLAENYK_	E7ER44;P02788	1.01108	1.01108	4.64793e-05	5.81018e-05	38	E7ER44;P02788	LTF	Lactotransferrin	E7ER44_HUMAN;TRFL_HUMAN	1	101.541	2.01541	Dengue	QC	NaN	NaN	NaN	31.5879	0.22289
Dengue / QC	_GEWVALNPLR_	P08603	0.341445	0.341445	4.65826e-05	5.82049e-05	86	P08603	CFH	Complement factor H	CFAH_HUMAN	1	26.7025	1.26702	Dengue	QC	NaN	NaN	NaN	40.6887	0.080611
Dengue / QC	_DKATFGC[Carbamidomethyl (C)]HDGYSLDGPEEIEC[Carbamidomethyl (C)]TK_	P02749	0.345265	0.345265	4.68188e-05	5.84673e-05	172	P02749	APOH	Beta-2-glycoprotein 1	APOH_HUMAN	1	27.0385	1.27038	Dengue	QC	NaN	NaN	NaN	93.6919	0.0742489
Dengue / QC	_VTMSVDTSKNQFSLK_	A0A0C4DH34	-0.433211	0.433211	4.6934e-05	5.85656e-05	168	A0A0C4DH34	IGHV4-28	Immunoglobulin heavy variable 4-28	HV428_HUMAN	1	-25.9388	0.740612	Dengue	QC	NaN	NaN	NaN	37.4705	0.129123
Dengue / QC	_SSGLPNIPVQTISR_	G3V0E5;P02786	-0.606333	0.606333	4.74219e-05	5.91349e-05	152	G3V0E5;P02786	TFRC	Transferrin receptor (P90, CD71), isoform CRA_c;Transferrin receptor protein 1	G3V0E5_HUMAN;TFR1_HUMAN	1	-34.3136	0.656864	Dengue	QC	NaN	NaN	NaN	46.5512	0.134246
Dengue / QC	_LGVYELLLK_	Q14624	0.287918	0.287918	4.75551e-05	5.92746e-05	140	Q14624	ITIH4	Inter-alpha-trypsin inhibitor heavy chain H4	ITIH4_HUMAN	1	22.0877	1.22088	Dengue	QC	NaN	NaN	NaN	100.395	0.0906031
Dengue / QC	_LQLKHLSLLTTLSNRVC[Carbamidomethyl (C)]SQYAAYGEK_	P02774;P02774-3	0.290595	0.290595	4.84238e-05	6.0277e-05	172	P02774;P02774-3	GC	Vitamin D-binding protein;Isoform 3 of Vitamin D-binding protein	VTDB_HUMAN	1	22.3145	1.22315	Dengue	QC	NaN	NaN	NaN	81.0227	0.122222
Dengue / QC	_FSGQLNSHGC[Carbamidomethyl (C)]FYQQVK_	P01023	-0.470119	0.470119	4.84938e-05	6.03507e-05	176	P01023	A2M	Alpha-2-macroglobulin	A2MG_HUMAN	1	-27.8095	0.721905	Dengue	QC	NaN	NaN	NaN	57.7759	0.104065
Dengue / QC	_RMPC[Carbamidomethyl (C)]AEDYLSVVLNQLC[Carbamidomethyl (C)]VLHEK[Methyl (KR)]_	P02768	0.587825	0.587825	4.86399e-05	6.04923e-05	84	P02768	ALB	Serum albumin	ALBU_HUMAN	1	50.2979	1.50298	Dengue	QC	NaN	NaN	NaN	48.3456	0.189654
Dengue / QC	_MQKEITALAPSTMK_	P60709	1.63073	1.63073	4.90962e-05	6.10327e-05	58	P60709	ACTB	Actin, cytoplasmic 1	ACTB_HUMAN	1	209.67	3.0967	Dengue	QC	NaN	NaN	NaN	33.068	0.316503
Dengue / QC	_EDPQTFYYAVAVVKK_	P02787	-0.226075	0.226075	4.9186e-05	6.11171e-05	176	P02787	TF	Serotransferrin	TRFE_HUMAN	1	-14.5042	0.854958	Dengue	QC	NaN	NaN	NaN	94.4973	0.0529872
Dengue / QC	_FLLKAEPLAFTFSHDYK_	P04114	1.19168	1.19168	4.99273e-05	6.19696e-05	24	P04114	APOB	Apolipoprotein B-100	APOB_HUMAN	1	128.418	2.28418	Dengue	QC	NaN	NaN	NaN	19.3391	0.19267
Dengue / QC	_FQVDNNNRLLLQQVSLPELPGEYSM[Oxidation (M)]K_	P01023	0.567439	0.567439	5.03893e-05	6.24738e-05	34	P01023	A2M	Alpha-2-macroglobulin	A2MG_HUMAN	1	48.1891	1.48189	Dengue	QC	NaN	NaN	NaN	11.1939	0.962058
Dengue / QC	_R[Methyl (KR)]TVAAPSVFIFPPSDEQLKSGTASVVC[Carbamidomethyl (C)]LLNNFYPR_	P01834	0.482698	0.482698	5.13074e-05	6.34577e-05	162	P01834	IGKC	Immunoglobulin kappa constant	IGKC_HUMAN	1	39.7355	1.39735	Dengue	QC	NaN	NaN	NaN	82.0306	0.250166
Dengue / QC	_AIC[Carbamidomethyl (C)]QEGKFEYPIC[Carbamidomethyl (C)]E_	Q9BXR6	1.08641	1.08641	5.12989e-05	6.34577e-05	50	Q9BXR6	CFHR5	Complement factor H-related protein 5	FHR5_HUMAN	1	112.346	2.12346	Dengue	QC	NaN	NaN	NaN	44.5423	0.202658
Dengue / QC	_DYWSTVK_	B0YIW2;P02656	1.50518	1.50518	5.13808e-05	6.35204e-05	14	B0YIW2;P02656	APOC3	Apolipoprotein C-III	B0YIW2_HUMAN;APOC3_HUMAN	1	183.86	2.8386	Dengue	QC	NaN	NaN	NaN	8.21805	0.223071
Dengue / QC	_NAEELKAR_	P06727	0.91288	0.91288	5.13937e-05	6.35224e-05	54	P06727	APOA4	Apolipoprotein A-IV	APOA4_HUMAN	1	88.2801	1.8828	Dengue	QC	NaN	NaN	NaN	34.4746	0.22534
Dengue / QC	_VHLTPEEK_	P68871	0.348127	0.348127	5.14471e-05	6.35603e-05	168	P68871	HBB	Hemoglobin subunit beta	HBB_HUMAN	1	27.2907	1.27291	Dengue	QC	NaN	NaN	NaN	138.986	0.118858
Dengue / QC	_YSQKFQGR_	A0A0C4DH29	1.52135	1.52135	5.15399e-05	6.36469e-05	36	A0A0C4DH29	IGHV1-3	Immunoglobulin heavy variable 1-3	HV103_HUMAN	1	187.06	2.8706	Dengue	QC	NaN	NaN	NaN	11.8955	0.232806
Dengue / QC	_AYIFIDEAHITQALIWLSQRQKDNGC[Carbamidomethyl (C)]FR_	P01023	0.812472	0.812472	5.16345e-05	6.37357e-05	138	P01023	A2M	Alpha-2-macroglobulin	A2MG_HUMAN	1	75.6218	1.75622	Dengue	QC	NaN	NaN	NaN	86.6266	0.157476
Dengue / QC	_EQLNLRESATITC[Carbamidomethyl (C)]LVTGFSPADVFVQWMQR_	P01871	-0.188172	0.188172	5.16236e-05	6.37357e-05	16	P01871	IGHM	Immunoglobulin heavy constant mu	IGHM_HUMAN	1	-12.2283	0.877717	Dengue	QC	NaN	NaN	NaN	6.04342	0.706819
Dengue / QC	_MDAHPPR_	P06396	0.548203	0.548203	5.17932e-05	6.39034e-05	110	P06396	GSN	Gelsolin	GELS_HUMAN	1	46.2264	1.46226	Dengue	QC	NaN	NaN	NaN	99.0052	0.135607
Dengue / QC	_LRTEGDGVYTLNDKK_	P00738	-0.483951	0.483951	5.23746e-05	6.4578e-05	176	P00738	HP	Haptoglobin	HPT_HUMAN	1	-28.4983	0.715017	Dengue	QC	NaN	NaN	NaN	62.3131	0.116093
Dengue / QC	_VAYDLVYYVR_	Q9Y6R7	0.74238	0.74238	5.28454e-05	6.51155e-05	120	Q9Y6R7	FCGBP	IgGFc-binding protein	FCGBP_HUMAN	1	67.2934	1.67293	Dengue	QC	NaN	NaN	NaN	86.9189	0.197684
Dengue / QC	_YKAEEHTVVLTVTGEPC[Carbamidomethyl (C)]HFPFQYHR_	P00748	0.486779	0.486779	5.31556e-05	6.54259e-05	108	P00748	F12	Coagulation factor XII	FA12_HUMAN	1	40.1313	1.40131	Dengue	QC	NaN	NaN	NaN	72.8893	0.103997
Dengue / QC	_AAWGKVGAHAGEYGAEALERMFLSFPTTK_	P69905	3.33854	3.33854	5.31463e-05	6.54259e-05	14	P69905	HBA1	Hemoglobin subunit alpha	HBA_HUMAN	1	911.582	10.1158	Dengue	QC	NaN	NaN	NaN	8.06467	0.257779
Dengue / QC	_M[Oxidation (M)]GPKGEPGDPVNLLR_	O75636	-0.462127	0.462127	5.38939e-05	6.62473e-05	170	O75636	FCN3	Ficolin-3	FCN3_HUMAN	1	-27.4085	0.725915	Dengue	QC	NaN	NaN	NaN	67.0182	0.108805
Dengue / QC	_LDVPVWDVEATLNFLK_	O00391	0.609678	0.609678	5.40738e-05	6.64539e-05	52	O00391	QSOX1	Sulfhydryl oxidase 1	QSOX1_HUMAN	1	52.5918	1.52592	Dengue	QC	NaN	NaN	NaN	8.47773	0.18714
Dengue / QC	_ITGYIIK_	P02751;P02751-15;P02751-3;P02751-7	0.443498	0.443498	5.52069e-05	6.77276e-05	108	P02751;P02751-15;P02751-3;P02751-7	FN1	Fibronectin;Isoform 15 of Fibronectin;Isoform 3 of Fibronectin;Isoform 7 of Fibronectin	FINC_HUMAN	1	35.9897	1.3599	Dengue	QC	NaN	NaN	NaN	102.674	0.0982934
Dengue / QC	_EYESYSDFER_	P07358	0.164191	0.164191	5.5195e-05	6.77276e-05	88	P07358	C8B	Complement component C8 beta chain	CO8B_HUMAN	1	12.0538	1.12054	Dengue	QC	NaN	NaN	NaN	73.8576	0.0917971
Dengue / QC	_SLLSNVEGDNAVPMQHNNRPTQPLKGR_	P00915	2.09918	2.09918	5.54455e-05	6.79904e-05	46	P00915	CA1	Carbonic anhydrase 1	CAH1_HUMAN	1	328.466	4.28466	Dengue	QC	NaN	NaN	NaN	36.3891	0.326368
Dengue / QC	_RNFGYTLR_	P05546	0.611911	0.611911	5.55603e-05	6.81164e-05	78	P05546	SERPIND1	Heparin cofactor 2	HEP2_HUMAN	1	52.8282	1.52828	Dengue	QC	NaN	NaN	NaN	26.3123	0.129314
Dengue / QC	_NPFVFAPTLLTVAVHFEEVAK_	P43652	1.10258	1.10258	5.56307e-05	6.81877e-05	60	P43652	AFM	Afamin	AFAM_HUMAN	1	114.738	2.14738	Dengue	QC	NaN	NaN	NaN	11.2911	0.165676
Dengue / QC	_SLIYAASSLQSGVPSK_	P04430	-0.594196	0.594196	5.6067e-05	6.86775e-05	172	P04430	IGKV1-16	Immunoglobulin kappa variable 1-16	KV116_HUMAN	1	-33.7587	0.662413	Dengue	QC	NaN	NaN	NaN	51.2428	0.143783
Dengue / QC	_KVADALTNAVAHVDDMPNALSALSDLHAHK_	P69905	0.572013	0.572013	5.71073e-05	6.98297e-05	108	P69905	HBA1	Hemoglobin subunit alpha	HBA_HUMAN	1	48.6596	1.4866	Dengue	QC	NaN	NaN	NaN	74.8154	0.0729064
Dengue / QC	_ATGIPDR[Methyl (KR)]FSGSGSGTDFTLTISR_	P01619	1.88143	1.88143	5.71853e-05	6.99098e-05	74	P01619	IGKV3-20	Immunoglobulin kappa variable 3-20	KV320_HUMAN	1	268.44	3.6844	Dengue	QC	NaN	NaN	NaN	39.493	0.260535
Dengue / QC	_SC[Carbamidomethyl (C)]DTPPPC[Carbamidomethyl (C)]PRC[Carbamidomethyl (C)]PAPELLGGPSVFLFPPKPK_	P01860	0.459099	0.459099	5.74496e-05	7.01717e-05	172	P01860	IGHG3	Immunoglobulin heavy constant gamma 3	IGHG3_HUMAN	1	37.4683	1.37468	Dengue	QC	NaN	NaN	NaN	147.768	0.12318
Dengue / QC	_FISLGEAC[Carbamidomethyl (C)]K_	P01024	0.362051	0.362051	5.7593e-05	7.03314e-05	126	P01024	C3	Complement C3	CO3_HUMAN	1	28.5251	1.28525	Dengue	QC	NaN	NaN	NaN	109.575	0.0979247
Dengue / QC	_NSLYLQMNSLK_	A0A0B4J1Y9	-0.328024	0.328024	5.86562e-05	7.15519e-05	158	A0A0B4J1Y9	IGHV3-72	Immunoglobulin heavy variable 3-72	HV372_HUMAN	1	-20.3373	0.796627	Dengue	QC	NaN	NaN	NaN	92.9902	0.0731415
Dengue / QC	_VVTPLSPPTNLHLEANPDTGVLTVSWER_	P02751;P02751-15;P02751-3;P02751-7	0.707269	0.707269	5.87018e-05	7.15919e-05	90	P02751;P02751-15;P02751-3;P02751-7	FN1	Fibronectin;Isoform 15 of Fibronectin;Isoform 3 of Fibronectin;Isoform 7 of Fibronectin	FINC_HUMAN	1	63.271	1.63271	Dengue	QC	NaN	NaN	NaN	42.0593	0.143854
Dengue / QC	_ESDTSYVSLKAPLTKPLK_	P02741	1.12531	1.12531	5.87665e-05	7.16553e-05	30	P02741	CRP	C-reactive protein	CRP_HUMAN	1	118.149	2.18149	Dengue	QC	NaN	NaN	NaN	21.6924	0.222077
Dengue / QC	_GSPAINVAVHVFR_	P02766	0.397054	0.397054	5.93498e-05	7.23035e-05	166	P02766	TTR	Transthyretin	TTHY_HUMAN	1	31.6816	1.31682	Dengue	QC	NaN	NaN	NaN	154.862	0.0931006
Dengue / QC	_FKDTYFVTGIVSWGEGC[Carbamidomethyl (C)]AR_	P00742	1.52057	1.52057	5.96341e-05	7.26184e-05	52	P00742	F10	Coagulation factor X	FA10_HUMAN	1	186.905	2.86905	Dengue	QC	NaN	NaN	NaN	13.5381	0.228613
Dengue / QC	_YEVSVYALK_	P02751;P02751-15;P02751-3;P02751-7	0.425548	0.425548	5.99383e-05	7.29729e-05	114	P02751;P02751-15;P02751-3;P02751-7	FN1	Fibronectin;Isoform 15 of Fibronectin;Isoform 3 of Fibronectin;Isoform 7 of Fibronectin	FINC_HUMAN	1	34.3082	1.34308	Dengue	QC	NaN	NaN	NaN	107.527	0.106342
Dengue / QC	_VFSNGADLSGVTEEAPLK_	P01009	-0.475573	0.475573	5.99762e-05	7.30032e-05	166	P01009	SERPINA1	Alpha-1-antitrypsin	A1AT_HUMAN	1	-28.0819	0.719181	Dengue	QC	NaN	NaN	NaN	107.888	0.0945905
Dengue / QC	_ETTDTEQTPGQEVVLSPGSFMSITFR_	P48740	0.345176	0.345176	6.00913e-05	7.31116e-05	90	P48740	MASP1	Mannan-binding lectin serine protease 1	MASP1_HUMAN	1	27.0306	1.27031	Dengue	QC	NaN	NaN	NaN	54.7852	0.103021
Dengue / QC	_AM[Oxidation (M)]ISSPPFR_	Q9BXR6	2.44592	2.44592	6.01557e-05	7.31711e-05	18	Q9BXR6	CFHR5	Complement factor H-related protein 5	FHR5_HUMAN	1	444.873	5.44873	Dengue	QC	NaN	NaN	NaN	6.2134	0.598844
Dengue / QC	_FLMKGPNK_	P08603	1.37177	1.37177	6.04895e-05	7.35322e-05	60	P08603	CFH	Complement factor H	CFAH_HUMAN	1	158.788	2.58788	Dengue	QC	NaN	NaN	NaN	38.1033	0.276194
Dengue / QC	_STSPPKQAEAVLK_	P04114	0.291332	0.291332	6.12131e-05	7.43312e-05	116	P04114	APOB	Apolipoprotein B-100	APOB_HUMAN	1	22.377	1.22377	Dengue	QC	NaN	NaN	NaN	52.7349	0.112802
Dengue / QC	_C[Carbamidomethyl (C)]RDQLPYIC[Carbamidomethyl (C)]QFGIV_	E9PHK0;P05452	1.47379	1.47379	6.13943e-05	7.45028e-05	34	E9PHK0;P05452	CLEC3B	Tetranectin	E9PHK0_HUMAN;TETN_HUMAN	1	177.75	2.7775	Dengue	QC	NaN	NaN	NaN	28.2019	0.333871
Dengue / QC	_NM[Oxidation (M)]EVSVATTTK_	P04114	0.706333	0.706333	6.14902e-05	7.46029e-05	56	P04114	APOB	Apolipoprotein B-100	APOB_HUMAN	1	63.1651	1.63165	Dengue	QC	NaN	NaN	NaN	12.8781	0.11701
Dengue / QC	_NSLYLQM[Oxidation (M)]NSLK[Methyl (KR)]_	A0A0B4J1Y9	-0.74947	0.74947	6.16749e-05	7.47623e-05	94	A0A0B4J1Y9	IGHV3-72	Immunoglobulin heavy variable 3-72	HV372_HUMAN	1	-40.5178	0.594822	Dengue	QC	NaN	NaN	NaN	36.809	0.14854
Dengue / QC	_AKLGNFPWQAFTSIHGR_	Q9NZP8	-0.406908	0.406908	6.29898e-05	7.62408e-05	158	Q9NZP8	C1RL	Complement C1r subcomponent-like protein	C1RL_HUMAN	1	-24.5762	0.754238	Dengue	QC	NaN	NaN	NaN	48.4134	0.0884037
Dengue / QC	_LPYTIITTPPLKDFSLWEK_	P04114	0.643409	0.643409	6.37452e-05	7.70719e-05	120	P04114	APOB	Apolipoprotein B-100	APOB_HUMAN	1	56.2015	1.56202	Dengue	QC	NaN	NaN	NaN	90.7356	0.0986431
Dengue / QC	_LSFVKVDSHFR_	P01023	-0.639442	0.639442	6.37959e-05	7.71165e-05	170	P01023	A2M	Alpha-2-macroglobulin	A2MG_HUMAN	1	-35.8039	0.641961	Dengue	QC	NaN	NaN	NaN	42.6321	0.151369
Dengue / QC	_ASQSISSWLAWYQQKPGKAPK_	P01602	-0.672042	0.672042	6.39752e-05	7.73165e-05	176	P01602	IGKV1-5	Immunoglobulin kappa variable 1-5	KV105_HUMAN	1	-37.2382	0.627618	Dengue	QC	NaN	NaN	NaN	49.7431	0.156863
Dengue / QC	_MKDGLC[Carbamidomethyl (C)]VPRK_	O95445	1.83203	1.83203	6.48477e-05	7.82866e-05	20	O95445	APOM	Apolipoprotein M	APOM_HUMAN	1	256.037	3.56037	Dengue	QC	NaN	NaN	NaN	8.28389	0.257808
Dengue / QC	_TAAISGYSFK_	P03951	0.429342	0.429342	6.5139e-05	7.85875e-05	72	P03951	F11	Coagulation factor XI	FA11_HUMAN	1	34.6619	1.34662	Dengue	QC	NaN	NaN	NaN	63.8879	0.111506
Dengue / QC	_TDC[Carbamidomethyl (C)]LSLPSFENAIPM[Oxidation (M)]GEKK_	P08603	0.653075	0.653075	6.5241e-05	7.86936e-05	32	P08603	CFH	Complement factor H	CFAH_HUMAN	1	57.2517	1.57252	Dengue	QC	NaN	NaN	NaN	23.8231	0.121179
Dengue / QC	_ASPAFLASQNTK_	P20742	2.34676	2.34676	6.54645e-05	7.88953e-05	114	P20742	PZP	Pregnancy zone protein	PZP_HUMAN	1	408.68	5.0868	Dengue	QC	NaN	NaN	NaN	76.0876	0.578899
Dengue / QC	_LSLESLTSYFSIESSTK_	P04114	1.25872	1.25872	6.54534e-05	7.88953e-05	74	P04114	APOB	Apolipoprotein B-100	APOB_HUMAN	1	139.283	2.39283	Dengue	QC	NaN	NaN	NaN	26.0537	0.214898
Dengue / QC	_LTITKDTSK_	P01817	-0.853716	0.853716	6.58733e-05	7.93432e-05	94	P01817	IGHV2-5	Immunoglobulin heavy variable 2-5	HV205_HUMAN	1	-44.6642	0.553358	Dengue	QC	NaN	NaN	NaN	21.2141	0.181043
Dengue / QC	_DFLGFYVVDSHR_	Q06033;Q06033-2	0.548366	0.548366	6.60799e-05	7.95514e-05	58	Q06033;Q06033-2	ITIH3	Inter-alpha-trypsin inhibitor heavy chain H3;Isoform 2 of Inter-alpha-trypsin inhibitor heavy chain H3	ITIH3_HUMAN	1	46.2428	1.46243	Dengue	QC	NaN	NaN	NaN	49.8167	0.157051
Dengue / QC	_RQDGSVDFFR_	O75636	-0.517675	0.517675	6.60959e-05	7.95536e-05	156	O75636	FCN3	Ficolin-3	FCN3_HUMAN	1	-30.1504	0.698496	Dengue	QC	NaN	NaN	NaN	42.1485	0.113738
Dengue / QC	_ANTVQEATFQMELPK_	Q14624	-0.362841	0.362841	6.61808e-05	7.96386e-05	174	Q14624	ITIH4	Inter-alpha-trypsin inhibitor heavy chain H4	ITIH4_HUMAN	1	-22.2369	0.777631	Dengue	QC	NaN	NaN	NaN	52.4393	0.0730705
Dengue / QC	_HQTVPQNTGGKNPDPWAK_	P02787	-0.301341	0.301341	6.68802e-05	8.03939e-05	176	P02787	TF	Serotransferrin	TRFE_HUMAN	1	-18.8502	0.811498	Dengue	QC	NaN	NaN	NaN	67.5809	0.0765155
Dengue / QC	_LLLQM[Oxidation (M)]DSSATAYGSTVSKR_	P04114	0.603007	0.603007	6.76024e-05	8.12098e-05	54	P04114	APOB	Apolipoprotein B-100	APOB_HUMAN	1	51.8879	1.51888	Dengue	QC	NaN	NaN	NaN	32.7019	0.175063
Dengue / QC	_NIIFVETSFTTLETR_	P22792	0.530623	0.530623	6.79423e-05	8.15657e-05	64	P22792	CPN2	Carboxypeptidase N subunit 2	CPN2_HUMAN	1	44.4553	1.44455	Dengue	QC	NaN	NaN	NaN	18.2052	0.117832
Dengue / QC	_AIPDLTAPVAAVQAAVSNLVR_	P18206;P18206-2	0.756794	0.756794	6.79306e-05	8.15657e-05	64	P18206;P18206-2	VCL	Vinculin;Isoform 1 of Vinculin	VINC_HUMAN	1	68.9732	1.68973	Dengue	QC	NaN	NaN	NaN	58.8874	0.180049
Dengue / QC	_DTVIKPLLVEPEGLEK_	P01023	-0.380801	0.380801	6.85851e-05	8.22317e-05	176	P01023	A2M	Alpha-2-macroglobulin	A2MG_HUMAN	1	-23.1989	0.768011	Dengue	QC	NaN	NaN	NaN	76.4951	0.0814301
Dengue / QC	_LEPGKEYLIM[Oxidation (M)]GLDGATYDLEGHPQYLLDSNSWIEEMPSER_	P0C0L5	1.11279	1.11279	6.87273e-05	8.23845e-05	26	P0C0L5	C4B	Complement C4-B	CO4B_HUMAN	1	116.263	2.16263	Dengue	QC	NaN	NaN	NaN	5.18738	0.194891
Dengue / QC	_TYETTLEK_	P02768	-0.333265	0.333265	7.05194e-05	8.43344e-05	176	P02768	ALB	Serum albumin	ALBU_HUMAN	1	-20.6262	0.793738	Dengue	QC	NaN	NaN	NaN	55.836	0.0755539
Dengue / QC	_MRPSTDTITVMVENSHGLR_	P0C0L5	0.218936	0.218936	7.08107e-05	8.46647e-05	176	P0C0L5	C4B	Complement C4-B	CO4B_HUMAN	1	16.3875	1.16387	Dengue	QC	NaN	NaN	NaN	131.227	0.0493919
Dengue / QC	_TGKAAQVTIQSSGTFSSK_	P01023	-0.704359	0.704359	7.10616e-05	8.49465e-05	154	P01023	A2M	Alpha-2-macroglobulin	A2MG_HUMAN	1	-38.6285	0.613715	Dengue	QC	NaN	NaN	NaN	47.5288	0.180203
Dengue / QC	_SVVLIPLGAVDDGEHSQNEK_	Q96KN2	0.318578	0.318578	7.15189e-05	8.53657e-05	80	Q96KN2	CNDP1	Beta-Ala-His dipeptidase	CNDP1_HUMAN	1	24.7101	1.2471	Dengue	QC	NaN	NaN	NaN	75.6171	0.0740456
Dengue / QC	_TIC[Carbamidomethyl (C)]ESSGIWSNPSPIC[Carbamidomethyl (C)]QK_	P14151;P14151-2	0.334508	0.334508	7.15592e-05	8.53774e-05	80	P14151;P14151-2	SELL	L-selectin;Isoform 2 of L-selectin	LYAM1_HUMAN	1	26.0948	1.26095	Dengue	QC	NaN	NaN	NaN	66.9491	0.131627
Dengue / QC	_ASAGLLGAHAAAITAYALTLTK_	P0C0L5	0.499021	0.499021	7.28458e-05	8.68016e-05	148	P0C0L5	C4B	Complement C4-B	CO4B_HUMAN	1	41.3254	1.41325	Dengue	QC	NaN	NaN	NaN	138.501	0.115668
Dengue / QC	_KAFC[Carbamidomethyl (C)]SFQIYAVPWQGTMTLSK_	P01034	1.16265	1.16265	7.28882e-05	8.68337e-05	36	P01034	CST3	Cystatin-C	CYTC_HUMAN	1	123.869	2.23869	Dengue	QC	NaN	NaN	NaN	28.0509	0.23853
Dengue / QC	_QMSKYPSGER_	P08603	0.800192	0.800192	7.302e-05	8.69721e-05	160	P08603	CFH	Complement factor H	CFAH_HUMAN	1	74.1333	1.74133	Dengue	QC	NaN	NaN	NaN	95.5243	0.146743
Dengue / QC	_FTC[Carbamidomethyl (C)]AC[Carbamidomethyl (C)]PDQFK_	Q14520;Q14520-2	0.333136	0.333136	7.31373e-05	8.70934e-05	102	Q14520;Q14520-2	HABP2	Hyaluronan-binding protein 2;Isoform 2 of Hyaluronan-binding protein 2	HABP2_HUMAN	1	25.9748	1.25975	Dengue	QC	NaN	NaN	NaN	78.6843	0.0664551
Dengue / QC	_HSC[Carbamidomethyl (C)]QAEC[Carbamidomethyl (C)]SSELYTEASGYISSLEYPR_	B4DPQ0	0.342256	0.342256	7.40743e-05	8.81156e-05	176	B4DPQ0	C1R	Complement C1r subcomponent	B4DPQ0_HUMAN	1	26.7737	1.26774	Dengue	QC	NaN	NaN	NaN	77.2783	0.079969
Dengue / QC	_VHVSEEGTEPEAMLQVLGPK_	P06396	0.205653	0.205653	7.40654e-05	8.81156e-05	78	P06396	GSN	Gelsolin	GELS_HUMAN	1	15.3209	1.15321	Dengue	QC	NaN	NaN	NaN	33.621	0.0958156
Dengue / QC	_LSINTHPSQKPLSITVR_	P01024	0.296198	0.296198	7.44469e-05	8.84837e-05	176	P01024	C3	Complement C3	CO3_HUMAN	1	22.7904	1.2279	Dengue	QC	NaN	NaN	NaN	104.384	0.0821812
Dengue / QC	_MALEVYK_	P04003	-0.282291	0.282291	7.51255e-05	8.92145e-05	176	P04003	C4BPA	C4b-binding protein alpha chain	C4BPA_HUMAN	1	-17.7716	0.822284	Dengue	QC	NaN	NaN	NaN	44.8929	0.0747876
Dengue / QC	_LLEPHC[Carbamidomethyl (C)]FPLSLVPTEFC[Carbamidomethyl (C)]PSPPALK_	P10643	0.331529	0.331529	7.64342e-05	9.0711e-05	102	P10643	C7	Complement component C7	CO7_HUMAN	1	25.8346	1.25835	Dengue	QC	NaN	NaN	NaN	52.648	0.134066
Dengue / QC	_AISGGSIQIENGYFVHYFAPEGLTTMPK_	Q14624	0.294966	0.294966	7.64697e-05	9.0734e-05	130	Q14624	ITIH4	Inter-alpha-trypsin inhibitor heavy chain H4	ITIH4_HUMAN	1	22.6856	1.22686	Dengue	QC	NaN	NaN	NaN	84.1893	0.0838357
Dengue / QC	_QHDMGHMMR_	P02751;P02751-15;P02751-3;P02751-7	1.02184	1.02184	7.65015e-05	9.07524e-05	24	P02751;P02751-15;P02751-3;P02751-7	FN1	Fibronectin;Isoform 15 of Fibronectin;Isoform 3 of Fibronectin;Isoform 7 of Fibronectin	FINC_HUMAN	1	103.051	2.03051	Dengue	QC	NaN	NaN	NaN	10.8541	0.196194
Dengue / QC	_ASQSVSSNLAWYQQK[Methyl (KR)]PGQAPR_	P01624	-0.63103	0.63103	7.72007e-05	9.1485e-05	172	P01624	IGKV3-15	Immunoglobulin kappa variable 3-15	KV315_HUMAN	1	-35.4285	0.645715	Dengue	QC	NaN	NaN	NaN	28.5131	0.176142
Dengue / QC	_DFNIPGFPTVR_	O00391	0.598071	0.598071	7.80203e-05	9.23001e-05	44	O00391	QSOX1	Sulfhydryl oxidase 1	QSOX1_HUMAN	1	51.3691	1.51369	Dengue	QC	NaN	NaN	NaN	34.5926	0.160527
Dengue / QC	_SHKSYSC[Carbamidomethyl (C)]QVTHEGSTVEK_	P0DOY3	0.901984	0.901984	7.82818e-05	9.25118e-05	148	P0DOY3	IGLC3	Immunoglobulin lambda constant 3	IGLC3_HUMAN	1	86.8634	1.86863	Dengue	QC	NaN	NaN	NaN	142.841	0.252808
Dengue / QC	_LVGGDNLC[Carbamidomethyl (C)]SGR_	O43866	-0.413723	0.413723	7.82415e-05	9.25118e-05	172	O43866	CD5L	CD5 antigen-like	CD5L_HUMAN	1	-24.9317	0.750683	Dengue	QC	NaN	NaN	NaN	68.6868	0.111483
Dengue / QC	_DQYYNIDVPSR_	A0A0U1RR20;Q92954;Q92954-3;Q92954-6	0.913167	0.913167	7.82642e-05	9.25118e-05	70	A0A0U1RR20;Q92954;Q92954-3;Q92954-6	PRG4	Proteoglycan 4;Proteoglycan 4;Isoform C of Proteoglycan 4;Isoform F of Proteoglycan 4	A0A0U1RR20_HUMAN;PRG4_HUMAN;PRG4_HUMAN;PRG4_HUMAN	1	88.3174	1.88317	Dengue	QC	NaN	NaN	NaN	6.58125	0.151279
Dengue / QC	_LAAYLMLMR_	P04114	0.361943	0.361943	7.83971e-05	9.26286e-05	154	P04114	APOB	Apolipoprotein B-100	APOB_HUMAN	1	28.5155	1.28516	Dengue	QC	NaN	NaN	NaN	109.014	0.102024
Dengue / QC	_YPIEHGIITNWDDMEK_	P68032;P68133	0.79198	0.79198	7.84861e-05	9.27142e-05	36	P68032;P68133	ACTC1;ACTA1	Actin, alpha cardiac muscle 1;Actin, alpha skeletal muscle	ACTC_HUMAN;ACTS_HUMAN	1	73.145	1.73145	Dengue	QC	NaN	NaN	NaN	17.8263	0.148811
Dengue / QC	_GSFPWQAK_	P00738	-0.274785	0.274785	7.88353e-05	9.30741e-05	176	P00738	HP	Haptoglobin	HPT_HUMAN	1	-17.3427	0.826573	Dengue	QC	NaN	NaN	NaN	66.3439	0.0789561
Dengue / QC	_C[Carbamidomethyl (C)]VC[Carbamidomethyl (C)]PVSNAMC[Carbamidomethyl (C)]R_	Q12805;Q12805-2;Q12805-4	1.07373	1.07373	7.88406e-05	9.30741e-05	70	Q12805;Q12805-2;Q12805-4	EFEMP1	EGF-containing fibulin-like extracellular matrix protein 1;Isoform 2 of EGF-containing fibulin-like extracellular matrix protein 1;Isoform 4 of EGF-containing fibulin-like extracellular matrix protein 1	FBLN3_HUMAN	1	110.487	2.10487	Dengue	QC	NaN	NaN	NaN	27.4051	0.216527
Dengue / QC	_NLQPASEYTVSLVAIK_	P02751;P02751-15;P02751-3;P02751-7	0.310378	0.310378	7.90424e-05	9.32927e-05	164	P02751;P02751-15;P02751-3;P02751-7	FN1	Fibronectin;Isoform 15 of Fibronectin;Isoform 3 of Fibronectin;Isoform 7 of Fibronectin	FINC_HUMAN	1	24.0032	1.24003	Dengue	QC	NaN	NaN	NaN	143.9	0.0916892
Dengue / QC	_YKDGDQC[Carbamidomethyl (C)]ETSPC[Carbamidomethyl (C)]QNQGK_	P00742	0.74155	0.74155	7.97614e-05	9.41017e-05	62	P00742	F10	Coagulation factor X	FA10_HUMAN	1	67.1971	1.67197	Dengue	QC	NaN	NaN	NaN	39.9275	0.116153
Dengue / QC	_IIALDGDTK_	A0A0B4J1R6;P29401;P29401-2	1.88053	1.88053	7.99701e-05	9.43082e-05	14	A0A0B4J1R6;P29401;P29401-2	TKT	Transketolase;Transketolase;Isoform 2 of Transketolase	A0A0B4J1R6_HUMAN;TKT_HUMAN;TKT_HUMAN	1	268.211	3.68211	Dengue	QC	NaN	NaN	NaN	8.90702	0.280722
Dengue / QC	_TVM[Oxidation (M)]VNIENPEGIPVKQDSLSSQNQLGVLPLSWDIPELVNMGQWK_	P01024	0.634813	0.634813	8.06226e-05	9.49822e-05	44	P01024	C3	Complement C3	CO3_HUMAN	1	55.2736	1.55274	Dengue	QC	NaN	NaN	NaN	30.329	0.216495
Dengue / QC	_STDYGIFQINSR_	P61626	-0.419287	0.419287	8.07171e-05	9.50491e-05	166	P61626	LYZ	Lysozyme C	LYSC_HUMAN	1	-25.2206	0.747794	Dengue	QC	NaN	NaN	NaN	108.409	0.0956929
Dengue / QC	_FGERAFKAWAVAR_	P02768	0.451247	0.451247	8.09211e-05	9.52493e-05	176	P02768	ALB	Serum albumin	ALBU_HUMAN	1	36.7221	1.36722	Dengue	QC	NaN	NaN	NaN	170.184	0.105599
Dengue / QC	_QFPILLDFKTK_	P05546	0.474353	0.474353	8.10822e-05	9.53827e-05	98	P05546	SERPIND1	Heparin cofactor 2	HEP2_HUMAN	1	38.9295	1.3893	Dengue	QC	NaN	NaN	NaN	31.0792	0.134344
Dengue / QC	_NPNGYSFSIPVK_	P04114	0.407415	0.407415	8.12411e-05	9.55456e-05	56	P04114	APOB	Apolipoprotein B-100	APOB_HUMAN	1	32.6307	1.32631	Dengue	QC	NaN	NaN	NaN	48.9323	0.0688628
Dengue / QC	_YYYDGKDYIEFNKEIPAWVPFDPAAQITK_	P25311	0.471168	0.471168	8.18882e-05	9.61972e-05	172	P25311	AZGP1	Zinc-alpha-2-glycoprotein	ZA2G_HUMAN	1	38.6232	1.38623	Dengue	QC	NaN	NaN	NaN	146.344	0.118155
Dengue / QC	_SGNTFRPEVHLLPPPSEELALNELVTLTC[Carbamidomethyl (C)]LAR_	A0A0G2JMB2	0.833672	0.833672	8.19533e-05	9.62419e-05	174	A0A0G2JMB2	IGHA2	Immunoglobulin heavy constant alpha 2 (Fragment)	A0A0G2JMB2_HUMAN	1	78.2216	1.78222	Dengue	QC	NaN	NaN	NaN	162.788	0.190631
Dengue / QC	_ISGLIYEETR_	P62805	1.81953	1.81953	8.19742e-05	9.62462e-05	26	P62805	HIST1H4A	Histone H4	H4_HUMAN	1	252.967	3.52967	Dengue	QC	NaN	NaN	NaN	13.2364	0.346988
Dengue / QC	_ELSHLPSLYDYSAYRR_	P10643	0.587747	0.587747	8.37824e-05	9.81636e-05	30	P10643	C7	Complement component C7	CO7_HUMAN	1	50.2898	1.5029	Dengue	QC	NaN	NaN	NaN	22.924	0.133639
Dengue / QC	_GRTLEIPGNSDPNMIPDGDFNSYVR_	P0C0L5	0.888645	0.888645	8.47924e-05	9.92847e-05	170	P0C0L5	C4B	Complement C4-B	CO4B_HUMAN	1	85.1436	1.85144	Dengue	QC	NaN	NaN	NaN	159.591	0.16869
Dengue / QC	_FMQAVTGWK_	P01019	-0.381825	0.381825	8.49307e-05	9.94259e-05	166	P01019	AGT	Angiotensinogen	ANGT_HUMAN	1	-23.2534	0.767466	Dengue	QC	NaN	NaN	NaN	81.7452	0.0768901
Dengue / QC	_IAPANADFAFR_	P29622	0.253386	0.253386	8.6068e-05	0.000100589	136	P29622	SERPINA4	Kallistatin	KAIN_HUMAN	1	19.2001	1.192	Dengue	QC	NaN	NaN	NaN	101.583	0.0635382
Dengue / QC	_LSC[Carbamidomethyl (C)]AASGFTFDDYAMHWVR[Methyl (KR)]_	P01782	0.718026	0.718026	8.68859e-05	0.000101482	50	P01782	IGHV3-9	Immunoglobulin heavy variable 3-9	HV309_HUMAN	1	64.493	1.64493	Dengue	QC	NaN	NaN	NaN	42.7257	0.168423
Dengue / QC	_RNHMQYEIVIK_	P19827	0.366902	0.366902	8.86381e-05	0.000103377	56	P19827	ITIH1	Inter-alpha-trypsin inhibitor heavy chain H1	ITIH1_HUMAN	1	28.9581	1.28958	Dengue	QC	NaN	NaN	NaN	43.6846	0.136396
Dengue / QC	_KC[Carbamidomethyl (C)]YFPYLENGYNQNYGRK_	P08603	0.62602	0.62602	8.97378e-05	0.000104574	112	P08603	CFH	Complement factor H	CFAH_HUMAN	1	54.3301	1.5433	Dengue	QC	NaN	NaN	NaN	67.8016	0.112434
Dengue / QC	_SSLSVPYVIVPLK_	P01024	-0.70551	0.70551	9.05936e-05	0.000105482	176	P01024	C3	Complement C3	CO3_HUMAN	1	-38.6774	0.613226	Dengue	QC	NaN	NaN	NaN	41.7751	0.181055
Dengue / QC	_VEGTAFVIFGIQDGEQR_	P01024	0.411145	0.411145	9.14274e-05	0.000106431	104	P01024	C3	Complement C3	CO3_HUMAN	1	32.9741	1.32974	Dengue	QC	NaN	NaN	NaN	57.9749	0.112978
Dengue / QC	_MDMTFSK_	P04114	0.310829	0.310829	9.21031e-05	0.000107151	122	P04114	APOB	Apolipoprotein B-100	APOB_HUMAN	1	24.042	1.24042	Dengue	QC	NaN	NaN	NaN	113.028	0.0693763
Dengue / QC	_LSSVTAADTAVYYC[Carbamidomethyl (C)]AR_	A0A075B6R2	-0.447626	0.447626	9.23834e-05	0.000107455	176	A0A075B6R2	IGHV4-4	Immunoglobulin heavy variable 4-4	HV404_HUMAN	1	-26.6752	0.733248	Dengue	QC	NaN	NaN	NaN	73.8652	0.104584
Dengue / QC	_AFQYHSK_	P00747	0.601589	0.601589	9.31868e-05	0.000108232	102	P00747	PLG	Plasminogen	PLMN_HUMAN	1	51.7387	1.51739	Dengue	QC	NaN	NaN	NaN	36.9125	0.216907
Dengue / QC	_GNPAVSYVR_	Q9Y6R7	0.829353	0.829353	9.36245e-05	0.000108673	98	Q9Y6R7	FCGBP	IgGFc-binding protein	FCGBP_HUMAN	1	77.6889	1.77689	Dengue	QC	NaN	NaN	NaN	87.4165	0.215497
Dengue / QC	_LVNGQSHISLSKAEFQDALEKLNM[Oxidation (M)]GITDLQGLR_	P0C0L5	0.303038	0.303038	9.53873e-05	0.000110513	130	P0C0L5	C4B	Complement C4-B	CO4B_HUMAN	1	23.374	1.23374	Dengue	QC	NaN	NaN	NaN	55.4271	0.138636
Dengue / QC	_FLHVPDTFEGHFDGVPVISKGQQK_	P19823	1.83592	1.83592	9.55193e-05	0.000110643	88	P19823	ITIH2	Inter-alpha-trypsin inhibitor heavy chain H2	ITIH2_HUMAN	1	256.999	3.56999	Dengue	QC	NaN	NaN	NaN	73.1525	0.343821
Dengue / QC	_ITEVALMGHLSC[Carbamidomethyl (C)]DTKEER_	P04114	0.302482	0.302482	9.56795e-05	0.000110783	112	P04114	APOB	Apolipoprotein B-100	APOB_HUMAN	1	23.3264	1.23326	Dengue	QC	NaN	NaN	NaN	47.8118	0.0672296
Dengue / QC	_QFPFLASIQNQGR_	P20160	1.52311	1.52311	9.58082e-05	0.000110909	24	P20160	AZU1	Azurocidin	CAP7_HUMAN	1	187.409	2.87409	Dengue	QC	NaN	NaN	NaN	18.0921	0.31018
Dengue / QC	_EALVPLVADHK_	Q04756	0.295599	0.295599	9.595e-05	0.00011105	148	Q04756	HGFAC	Hepatocyte growth factor activator	HGFA_HUMAN	1	22.7394	1.22739	Dengue	QC	NaN	NaN	NaN	88.017	0.060949
Dengue / QC	_TTPPMLDSDGSFFLYSKLTVDK_	P01859	0.227164	0.227164	9.70148e-05	0.00011219	34	P01859	IGHG2	Immunoglobulin heavy constant gamma 2	IGHG2_HUMAN	1	17.0531	1.17053	Dengue	QC	NaN	NaN	NaN	29.0385	0.123325
Dengue / QC	_YTHLSC[Carbamidomethyl (C)]DKVFC[Carbamidomethyl (C)]QPWQR_	E7ETH0;G3XAM2;P05156	0.705734	0.705734	9.7507e-05	0.000112689	90	E7ETH0;G3XAM2;P05156	CFI	Complement factor I	E7ETH0_HUMAN;G3XAM2_HUMAN;CFAI_HUMAN	1	63.0974	1.63097	Dengue	QC	NaN	NaN	NaN	70.4969	0.159356
Dengue / QC	_LEDMEQALSPSVFK_	P05155;P05155-3	0.553737	0.553737	9.76197e-05	0.000112773	74	P05155;P05155-3	SERPING1	Plasma protease C1 inhibitor;Isoform 3 of Plasma protease C1 inhibitor	IC1_HUMAN	1	46.7883	1.46788	Dengue	QC	NaN	NaN	NaN	53.8613	0.157123
Dengue / QC	_DGNTLTYYR_	P02748	-0.415391	0.415391	9.76942e-05	0.000112812	170	P02748	C9	Complement component C9	CO9_HUMAN	1	-25.0184	0.749816	Dengue	QC	NaN	NaN	NaN	57.9509	0.0903259
Dengue / QC	_AAPSVTLFPPSSEELQANK_	P0DOY2	-0.415083	0.415083	9.77537e-05	0.000112858	174	P0DOY2	IGLC2	Immunoglobulin lambda constant 2	IGLC2_HUMAN	1	-25.0024	0.749976	Dengue	QC	NaN	NaN	NaN	94.724	0.0912054
Dengue / QC	_ADLSGITGAR_	P01011	-0.27033	0.27033	9.78045e-05	0.000112893	172	P01011	SERPINA3	Alpha-1-antichymotrypsin	AACT_HUMAN	1	-17.087	0.82913	Dengue	QC	NaN	NaN	NaN	73.9363	0.080315
Dengue / QC	_AMAVEDIISR_	P07357	-0.422078	0.422078	9.80845e-05	0.000113193	152	P07357	C8A	Complement component C8 alpha chain	CO8A_HUMAN	1	-25.3651	0.746349	Dengue	QC	NaN	NaN	NaN	48.6147	0.0904701
Dengue / QC	_TNTGLALR_	P04275	0.777951	0.777951	9.82749e-05	0.000113372	32	P04275	VWF	von Willebrand factor	VWF_HUMAN	1	71.4694	1.71469	Dengue	QC	NaN	NaN	NaN	26.9583	0.145841
Dengue / QC	_AVVFLEPQWYSVLEKDSVTLK_	A0A087WZR4;H0Y4U3;M9MML6;O75015	2.62523	2.62523	9.90723e-05	0.000114239	28	A0A087WZR4;H0Y4U3;M9MML6;O75015	FCGR3B	Low affinity immunoglobulin gamma Fc region receptor III-B;Low affinity immunoglobulin gamma Fc region receptor III-B (Fragment);Low affinity immunoglobulin gamma Fc region receptor III-B;Low affinity immunoglobulin gamma Fc region receptor III-B	A0A087WZR4_HUMAN;H0Y4U3_HUMAN;M9MML6_HUMAN;FCG3B_HUMAN	1	516.984	6.16984	Dengue	QC	NaN	NaN	NaN	7.73115	0.251417
Dengue / QC	_FFSAQTNR_	P29622	0.521397	0.521397	9.91961e-05	0.000114358	94	P29622	SERPINA4	Kallistatin	KAIN_HUMAN	1	43.5345	1.43534	Dengue	QC	NaN	NaN	NaN	32.2545	0.117626
Dengue / QC	_QDPPSVVVTSHQAPGEK_	P25311	0.321055	0.321055	9.97027e-05	0.000114848	96	P25311	AZGP1	Zinc-alpha-2-glycoprotein	ZA2G_HUMAN	1	24.9244	1.24924	Dengue	QC	NaN	NaN	NaN	44.6623	0.100705
Dengue / QC	_VNEPSILEMSR_	O14791;O14791-2	-0.241879	0.241879	0.000100738	0.000115993	176	O14791;O14791-2	APOL1	Apolipoprotein L1;Isoform 2 of Apolipoprotein L1	APOL1_HUMAN	1	-15.4357	0.845643	Dengue	QC	NaN	NaN	NaN	100.188	0.0582299
Dengue / QC	_EGGPSQIGDALGFAVR_	P04275	0.776154	0.776154	0.000101102	0.000116316	80	P04275	VWF	von Willebrand factor	VWF_HUMAN	1	71.2559	1.71256	Dengue	QC	NaN	NaN	NaN	69.5095	0.196947
Dengue / QC	_GAYPLSIEPIGVR_	P00450	-0.464065	0.464065	0.000104416	0.000119785	176	P00450	CP	Ceruloplasmin	CERU_HUMAN	1	-27.5059	0.724941	Dengue	QC	NaN	NaN	NaN	50.0603	0.0990055
Dengue / QC	_AEEHTVVLTVTGEPC[Carbamidomethyl (C)]HFPFQYHR_	P00748	0.337769	0.337769	0.000104579	0.000119939	130	P00748	F12	Coagulation factor XII	FA12_HUMAN	1	26.3801	1.2638	Dengue	QC	NaN	NaN	NaN	113.635	0.0929691
Dengue / QC	_ATLELSPWQMSALVQVHASQPSSFHDFPDLGQEVALNANTK_	P04114	2.30658	2.30658	0.000104593	0.000119939	30	P04114	APOB	Apolipoprotein B-100	APOB_HUMAN	1	394.708	4.94708	Dengue	QC	NaN	NaN	NaN	22.7641	0.438068
Dengue / QC	_AEDTALYYC[Carbamidomethyl (C)]AK_	P01782	-0.472954	0.472954	0.000104774	0.000120048	176	P01782	IGHV3-9	Immunoglobulin heavy variable 3-9	HV309_HUMAN	1	-27.9512	0.720488	Dengue	QC	NaN	NaN	NaN	59.7085	0.111365
Dengue / QC	_LNRVNDAQEYR_	Q9UGM5	0.693026	0.693026	0.000105255	0.000120549	30	Q9UGM5	FETUB	Fetuin-B	FETUB_HUMAN	1	61.667	1.61667	Dengue	QC	NaN	NaN	NaN	16.4117	0.199211
Dengue / QC	_EKAGFSWIEVTFK_	Q14624	0.445773	0.445773	0.000105727	0.000121016	64	Q14624	ITIH4	Inter-alpha-trypsin inhibitor heavy chain H4	ITIH4_HUMAN	1	36.2044	1.36204	Dengue	QC	NaN	NaN	NaN	40.6774	0.120094
Dengue / QC	_EHSSLAFWK_	P02749	0.215789	0.215789	0.000106442	0.00012176	164	P02749	APOH	Beta-2-glycoprotein 1	APOH_HUMAN	1	16.1339	1.16134	Dengue	QC	NaN	NaN	NaN	133.734	0.0564792
Dengue / QC	_GISMLNK_	Q06033;Q06033-2	-0.43636	0.43636	0.000107471	0.000122862	176	Q06033;Q06033-2	ITIH3	Inter-alpha-trypsin inhibitor heavy chain H3;Isoform 2 of Inter-alpha-trypsin inhibitor heavy chain H3	ITIH3_HUMAN	1	-26.1003	0.738997	Dengue	QC	NaN	NaN	NaN	70.4862	0.0999454
Dengue / QC	_RSDTSLTWNSVK_	E7ER44;P02788	1.00311	1.00311	0.00010757	0.000122949	52	E7ER44;P02788	LTF	Lactotransferrin	E7ER44_HUMAN;TRFL_HUMAN	1	100.432	2.00432	Dengue	QC	NaN	NaN	NaN	31.5678	0.299906
Dengue / QC	_MVSGFIPLKPTVK_	P01023	-0.392901	0.392901	0.000107743	0.000123085	176	P01023	A2M	Alpha-2-macroglobulin	A2MG_HUMAN	1	-23.8403	0.761597	Dengue	QC	NaN	NaN	NaN	67.0222	0.0877314
Dengue / QC	_TC[Carbamidomethyl (C)]NHPVPQHGGPFC[Carbamidomethyl (C)]AGDATR_	P27918	0.391181	0.391181	0.000107754	0.000123085	142	P27918	CFP	Properdin	PROP_HUMAN	1	31.1466	1.31147	Dengue	QC	NaN	NaN	NaN	68.9164	0.125518
Dengue / QC	_NGNMAGISDQR_	P05546	0.341158	0.341158	0.000108175	0.00012349	98	P05546	SERPIND1	Heparin cofactor 2	HEP2_HUMAN	1	26.6773	1.26677	Dengue	QC	NaN	NaN	NaN	84.3296	0.0835775
Dengue / QC	_HPNVFGFC[Carbamidomethyl (C)]R_	P04196	-0.319087	0.319087	0.000108229	0.000123527	176	P04196	HRG	Histidine-rich glycoprotein	HRG_HUMAN	1	-19.8423	0.801577	Dengue	QC	NaN	NaN	NaN	62.3805	0.0700862
Dengue / QC	_GFSLDEATNLNGGLLR_	P19827	0.412065	0.412065	0.000109065	0.000124354	160	P19827	ITIH1	Inter-alpha-trypsin inhibitor heavy chain H1	ITIH1_HUMAN	1	33.0589	1.33059	Dengue	QC	NaN	NaN	NaN	118.45	0.109867
Dengue / QC	_GDELADSALEIFK_	Q15582	1.1775	1.1775	0.000110175	0.000125543	30	Q15582	TGFBI	Transforming growth factor-beta-induced protein ig-h3	BGH3_HUMAN	1	126.184	2.26184	Dengue	QC	NaN	NaN	NaN	8.58954	0.167391
Dengue / QC	_TPDFC[Carbamidomethyl (C)]AMSC[Carbamidomethyl (C)]PPSLVYNHC[Carbamidomethyl (C)]EHGC[Carbamidomethyl (C)]PR_	P04275	0.690222	0.690222	0.000110511	0.000125901	90	P04275	VWF	von Willebrand factor	VWF_HUMAN	1	61.3532	1.61353	Dengue	QC	NaN	NaN	NaN	63.1713	0.155663
Dengue / QC	_LLIYDNNKRPSGIPDR_	P01701	-0.374625	0.374625	0.000110662	0.000126021	162	P01701	IGLV1-51	Immunoglobulin lambda variable 1-51	LV151_HUMAN	1	-22.8694	0.771306	Dengue	QC	NaN	NaN	NaN	110.538	0.0919693
Dengue / QC	_SVLGQLGITK_	P01009	-0.389704	0.389704	0.000110944	0.00012629	176	P01009	SERPINA1	Alpha-1-antitrypsin	A1AT_HUMAN	1	-23.6714	0.763286	Dengue	QC	NaN	NaN	NaN	113.857	0.0821255
Dengue / QC	_IC[Carbamidomethyl (C)]LDPDAPR_	P02775	-0.296164	0.296164	0.000111319	0.000126692	176	P02775	PPBP	Platelet basic protein	CXCL7_HUMAN	1	-18.5585	0.814415	Dengue	QC	NaN	NaN	NaN	84.3807	0.0737775
Dengue / QC	_INPNSGGTNYAQK_	A0A075B7D0	1.68146	1.68146	0.000111837	0.00012723	50	A0A075B7D0	IGHV1OR15-1	Immunoglobulin heavy variable 1/OR15-1 (non-functional) (Fragment)	A0A075B7D0_HUMAN	1	220.753	3.20753	Dengue	QC	NaN	NaN	NaN	24.4015	0.394329
Dengue / QC	_QIGSVYR_	P04196	-0.474881	0.474881	0.000112007	0.000127398	112	P04196	HRG	Histidine-rich glycoprotein	HRG_HUMAN	1	-28.0474	0.719526	Dengue	QC	NaN	NaN	NaN	52.9322	0.104463
Dengue / QC	_LQDRGPDVLTATVSGK_	Q14624	-0.370636	0.370636	0.000112241	0.000127612	172	Q14624	ITIH4	Inter-alpha-trypsin inhibitor heavy chain H4	ITIH4_HUMAN	1	-22.6559	0.773441	Dengue	QC	NaN	NaN	NaN	50.1842	0.088166
Dengue / QC	_IKVLNQELR_	P05090	0.465707	0.465707	0.000113893	0.000129358	128	P05090	APOD	Apolipoprotein D	APOD_HUMAN	1	38.0994	1.38099	Dengue	QC	NaN	NaN	NaN	115.31	0.117619
Dengue / QC	_ILLM[Oxidation (M)]DLNEEDPTVLELGITGSK_	P27169	1.00795	1.00795	0.000115428	0.000130916	62	P27169	PON1	Serum paraoxonase/arylesterase 1	PON1_HUMAN	1	101.105	2.01105	Dengue	QC	NaN	NaN	NaN	11.8808	0.189321
Dengue / QC	_LMIYDVSK[Dimethyl (KR)]_	P01706	-0.544742	0.544742	0.000115456	0.000130922	164	P01706	IGLV2-11	Immunoglobulin lambda variable 2-11	LV211_HUMAN	1	-31.4486	0.685514	Dengue	QC	NaN	NaN	NaN	116.913	0.126796
Dengue / QC	_YKATLLDIYK_	P01031	1.11081	1.11081	0.00011566	0.000131126	20	P01031	C5	Complement C5	CO5_HUMAN	1	115.967	2.15967	Dengue	QC	NaN	NaN	NaN	4.64527	0.112687
Dengue / QC	_AARLPVAPLRK_	P09871	1.08318	1.08318	0.00011657	0.000131998	42	P09871	C1S	Complement C1s subcomponent	C1S_HUMAN	1	111.87	2.1187	Dengue	QC	NaN	NaN	NaN	36.0122	0.220753
Dengue / QC	_DSVTETLPR_	P03951	0.956627	0.956627	0.000116966	0.000132339	28	P03951	F11	Coagulation factor XI	FA11_HUMAN	1	94.0767	1.94077	Dengue	QC	NaN	NaN	NaN	11.3146	0.191967
Dengue / QC	_TGYYFDGISR_	P23142	0.371061	0.371061	0.000117138	0.000132507	170	P23142	FBLN1	Fibulin-1	FBLN1_HUMAN	1	29.3304	1.2933	Dengue	QC	NaN	NaN	NaN	150.45	0.101322
Dengue / QC	_GNRIAQWQSFQLEGGLKQFSFPLSSEPFQGSYK_	P01023	1.02726	1.02726	0.000118196	0.000133651	106	P01023	A2M	Alpha-2-macroglobulin	A2MG_HUMAN	1	103.815	2.03815	Dengue	QC	NaN	NaN	NaN	81.428	0.136863
Dengue / QC	_FSGSGSGTDFTLK_	A0A087X0Q4	-0.306203	0.306203	0.000119687	0.000135162	176	A0A087X0Q4	IGKV2-40	Immunoglobulin kappa variable 2-40	A0A087X0Q4_HUMAN	1	-19.1232	0.808768	Dengue	QC	NaN	NaN	NaN	77.4242	0.0691843
Dengue / QC	_VTVFPIGIGDR_	P04275	0.69628	0.69628	0.000119702	0.000135162	62	P04275	VWF	von Willebrand factor	VWF_HUMAN	1	62.0322	1.62032	Dengue	QC	NaN	NaN	NaN	46.729	0.154185
Dengue / QC	_YKAAFTEC[Carbamidomethyl (C)]C[Carbamidomethyl (C)]QAADKAAC[Carbamidomethyl (C)]LLPK_	P02768	0.472947	0.472947	0.000120195	0.000135691	174	P02768	ALB	Serum albumin	ALBU_HUMAN	1	38.7942	1.38794	Dengue	QC	NaN	NaN	NaN	135.676	0.117425
Dengue / QC	_QDNEILIFWSK_	P02741	0.889706	0.889706	0.000120805	0.000136325	112	P02741	CRP	C-reactive protein	CRP_HUMAN	1	85.2798	1.8528	Dengue	QC	NaN	NaN	NaN	94.9693	0.222137
Dengue / QC	_ETC[Carbamidomethyl (C)]FAEEGK_	P02768	2.02399	2.02399	0.000121551	0.000137057	116	P02768	ALB	Serum albumin	ALBU_HUMAN	1	306.707	4.06707	Dengue	QC	NaN	NaN	NaN	60.07	0.352913
Dengue / QC	_VLLDGVQNPRAEDLVGK_	P01024	0.727185	0.727185	0.00012279	0.000138259	106	P01024	C3	Complement C3	CO3_HUMAN	1	65.5405	1.65541	Dengue	QC	NaN	NaN	NaN	87.5285	0.162264
Dengue / QC	_FQSVFTVTR_	P02747	-0.263686	0.263686	0.000123131	0.000138562	176	P02747	C1QC	Complement C1q subcomponent subunit C	C1QC_HUMAN	1	-16.7043	0.832957	Dengue	QC	NaN	NaN	NaN	55.5825	0.0620697
Dengue / QC	_NPDSGKQPWC[Carbamidomethyl (C)]YTTDPC[Carbamidomethyl (C)]VR_	P08519	2.6448	2.6448	0.000124012	0.000139467	50	P08519	LPA	Apolipoprotein(a)	APOA_HUMAN	1	525.409	6.25409	Dengue	QC	NaN	NaN	NaN	23.5454	0.392747
Dengue / QC	_MRPWKDPPSDLLLLK_	A0A0A0MRJ7;P12259	0.683575	0.683575	0.000125882	0.000141372	30	A0A0A0MRJ7;P12259	F5	Coagulation factor V	A0A0A0MRJ7_HUMAN;FA5_HUMAN	1	60.6115	1.60612	Dengue	QC	NaN	NaN	NaN	23.788	0.157076
Dengue / QC	_VTTVASHTSDSDVPSGVTEVVVKLFDSDPITVTVPVEVSR_	P10909;P10909-2;P10909-4;P10909-5	0.626163	0.626163	0.000126655	0.000142125	108	P10909;P10909-2;P10909-4;P10909-5	CLU	Clusterin;Isoform 2 of Clusterin;Isoform 4 of Clusterin;Isoform 5 of Clusterin	CLUS_HUMAN	1	54.3454	1.54345	Dengue	QC	NaN	NaN	NaN	50.9213	0.171969
Dengue / QC	_TKGQPREPQVYTLPPSR_	P01860	0.577431	0.577431	0.000127452	0.000142934	172	P01860	IGHG3	Immunoglobulin heavy constant gamma 3	IGHG3_HUMAN	1	49.219	1.49219	Dengue	QC	NaN	NaN	NaN	148.619	0.169604
[truncated: 16,730 more rows]
