# Supplementary material for: Re-mining serum proteomics data reveals extensive post-translational modifications upon Zika and dengue infection
Source: Royal Society of Chemistry journal article supplement (doi:10.1039/d2mo00258b), 2023-02-15
Supplement: d2mo00258b7.xlsx [file d2mo00258b7.xlsx]

## Sheet: 2020_09_11_Zika_PTM_HTRMS_Phosp
Comparison (group1/group2)	Group	ProteinGroups	AVG Log2 Ratio	Absolute AVG Log2 Ratio	Pvalue	Qvalue	# of Ratios	UniProtIds	Genes	ProteinDescriptions	ProteinNames	# Unique Total Peptides	% Change	Ratio	Condition Numerator	Condition Denominator	GO Cellular Component	GO Molecular Function	GO Biological Process	Degrees Of Freedom	Standard Error
Dengue / QC	_AFIQLWAFDAVKGKC[Carbamidomethyl (C)]VLFPYGGC[Carbamidomethyl (C)]QGNGNK_	P02760	-0.0732017	0.0732017	0.0802539	0.0403472	12	P02760	AMBP	Protein AMBP	AMBP_HUMAN	1	-4.94738	0.950526	Dengue	QC	NaN	NaN	NaN	2.05056	1.6735
Dengue / QC	_FLDLLEPLGR_	H0YJE6;P11277;P11277-2;P11277-3	0.310493	0.310493	0.0147268	0.00948365	10	H0YJE6;P11277;P11277-2;P11277-3	SPTB	Spectrin beta chain, erythrocytic (Fragment);Spectrin beta chain, erythrocytic;Isoform 2 of Spectrin beta chain, erythrocytic;Isoform 3 of Spectrin beta chain, erythrocytic	H0YJE6_HUMAN;SPTB1_HUMAN;SPTB1_HUMAN;SPTB1_HUMAN	1	24.0131	1.24013	Dengue	QC	NaN	NaN	NaN	1.06504	0.135269
Dengue / QC	_LNWEAPPGAFDSFLLR_	A0A087X0I0;A0A140T8Y3;A0A140T8Z8;A0A140TA52;P22105;P22105-3;P22105-4	1.01374	1.01374	0.00343036	0.00267946	8	A0A087X0I0;A0A140T8Y3;A0A140T8Z8;A0A140TA52;P22105;P22105-3;P22105-4	TNXB	Tenascin-X;Tenascin-X;Tenascin-X (Fragment);Tenascin-X;Tenascin-X;Isoform 4 of Tenascin-X;Isoform 5 of Tenascin-X	A0A087X0I0_HUMAN;A0A140T8Y3_HUMAN;A0A140T8Z8_HUMAN;A0A140TA52_HUMAN;TENX_HUMAN;TENX_HUMAN;TENX_HUMAN	1	101.914	2.01914	Dengue	QC	NaN	NaN	NaN	1.33477	0.0805577
Dengue / QC	_VQQNVPSGTDTGDPQSK_	O14791;O14791-2	0.954728	0.954728	0.406345	0.152337	26	O14791;O14791-2	APOL1	Apolipoprotein L1;Isoform 2 of Apolipoprotein L1	APOL1_HUMAN	1	93.8215	1.93821	Dengue	QC	NaN	NaN	NaN	2.00773	3.59278
Dengue / QC	_GC[Carbamidomethyl (C)]GEQTM[Oxidation (M)]IYLAPTLAASR_	P0C0L5	0.291056	0.291056	0.310477	0.123085	52	P0C0L5	C4B	Complement C4-B	CO4B_HUMAN	1	22.3536	1.22354	Dengue	QC	NaN	NaN	NaN	5.04399	3.09029
Dengue / QC	_DSTLIMQLLR_	P62258	1.03455	1.03455	0.000154056	0.000173988	18	P62258	YWHAE	14-3-3 protein epsilon	1433E_HUMAN	1	104.848	2.04848	Dengue	QC	NaN	NaN	NaN	3.81002	0.226524
Dengue / QC	_TC[Carbamidomethyl (C)]HIQEC[Carbamidomethyl (C)]DKR_	P07996	-2.46703	2.46703	0.000935311	0.000854456	8	P07996	THBS1	Thrombospondin-1	TSP1_HUMAN	1	-81.9137	0.180863	Dengue	QC	NaN	NaN	NaN	2.36139	0.150942
Dengue / QC	_FRDIASPK_	A0A0C4DFP6;Q9NQ79;Q9NQ79-2	2.17006	2.17006	0.383062	0.145317	12	A0A0C4DFP6;Q9NQ79;Q9NQ79-2	CRTAC1	Cartilage acidic protein 1;Cartilage acidic protein 1;Isoform 2 of Cartilage acidic protein 1	A0A0C4DFP6_HUMAN;CRAC1_HUMAN;CRAC1_HUMAN	1	350.041	4.50041	Dengue	QC	NaN	NaN	NaN	1.03466	2.17791
Dengue / QC	_TLC[Carbamidomethyl (C)]EC[Carbamidomethyl (C)]AGGLEC[Carbamidomethyl (C)]AC[Carbamidomethyl (C)]PALLEYAR_	P04275	4.95221	4.95221	0.00340213	0.00266066	14	P04275	VWF	von Willebrand factor	VWF_HUMAN	1	2995.74	30.9574	Dengue	QC	NaN	NaN	NaN	4.89125	0.560244
Dengue / QC	_NEADELR_	O14791;O14791-2	-3.45525	3.45525	0.219024	0.0923539	16	O14791;O14791-2	APOL1	Apolipoprotein L1;Isoform 2 of Apolipoprotein L1	APOL1_HUMAN	1	-90.8827	0.0911732	Dengue	QC	NaN	NaN	NaN	1.17599	1.19859
Dengue / QC	_EKLTALTK_	P04114	-1.54998	1.54998	0.189938	0.0821298	36	P04114	APOB	Apolipoprotein B-100	APOB_HUMAN	1	-65.8485	0.341515	Dengue	QC	NaN	NaN	NaN	4.03411	1.73047
Dengue / QC	_GVGHPYR_	O75636	-2.11737	2.11737	0.0067066	0.00481487	12	O75636	FCN3	Ficolin-3	FCN3_HUMAN	1	-76.9533	0.230467	Dengue	QC	NaN	NaN	NaN	3.91248	0.485977
Dengue / QC	_QGTTVPR_	Q6EMK4	0.641134	0.641134	0.0524516	0.0281631	18	Q6EMK4	VASN	Vasorin	VASN_HUMAN	1	55.9554	1.55955	Dengue	QC	NaN	NaN	NaN	3.43521	0.828274
Dengue / QC	_SLHM[Oxidation (M)]YANR_	P04114	2.78198	2.78198	0.617324	0.212358	24	P04114	APOB	Apolipoprotein B-100	APOB_HUMAN	1	587.795	6.87795	Dengue	QC	NaN	NaN	NaN	2.00643	3.79343
Dengue / QC	_GTGENYRGNVAVTVSGHTC[Carbamidomethyl (C)]QHWSAQTPHTHNR_	P00747	-2.27009	2.27009	0.0280931	0.0165388	8	P00747	PLG	Plasminogen	PLMN_HUMAN	1	-79.2682	0.207318	Dengue	QC	NaN	NaN	NaN	1.99623	0.378476
Dengue / QC	_AVGSGATFSHYYYM[Oxidation (M)]ILSRGQIVFMNREPK_	P0C0L5	1.09741	1.09741	0.753261	0.247062	72	P0C0L5	C4B	Complement C4-B	CO4B_HUMAN	1	113.97	2.1397	Dengue	QC	NaN	NaN	NaN	3.00229	6.10214
Dengue / QC	_YLGVTLSPR_	P40197	1.92457	1.92457	0.760934	0.248886	20	P40197	GP5	Platelet glycoprotein V	GPV_HUMAN	1	279.625	3.79625	Dengue	QC	NaN	NaN	NaN	1.00079	5.04379
Dengue / QC	_RLGM[Oxidation (M)]FNIQHC[Carbamidomethyl (C)]KK_	P01009	0.0212174	0.0212174	0.0611907	0.0320478	128	P01009	SERPINA1	Alpha-1-antitrypsin	A1AT_HUMAN	1	1.48154	1.01482	Dengue	QC	NaN	NaN	NaN	18.6468	0.989694
Dengue / QC	_ELNELGSK_	B4E1Z4	0.230809	0.230809	0.48675	0.175688	34	B4E1Z4	NaN	cDNA FLJ55673, highly similar to Complement factor B (EC 3.4.21.47)	B4E1Z4_HUMAN	1	17.3493	1.17349	Dengue	QC	NaN	NaN	NaN	2.0259	2.24006
Dengue / QC	_KDKC[Carbamidomethyl (C)]EPLEK_	P19652	-1.85572	1.85572	0.0199686	0.0123546	60	P19652	ORM2	Alpha-1-acid glycoprotein 2	A1AG2_HUMAN	1	-72.3706	0.276294	Dengue	QC	NaN	NaN	NaN	5.31479	0.573554
Dengue / QC	_M[Oxidation (M)]LTPEHVFIHPGWK_	P09871	0.192057	0.192057	0.030985	0.0179971	112	P09871	C1S	Complement C1s subcomponent	C1S_HUMAN	1	14.2392	1.14239	Dengue	QC	NaN	NaN	NaN	17.9123	0.769802
Dengue / QC	_QHSDPC[Carbamidomethyl (C)]ALNPR_	P04275	2.02261	2.02261	0.643624	0.219474	30	P04275	VWF	von Willebrand factor	VWF_HUMAN	1	306.318	4.06318	Dengue	QC	NaN	NaN	NaN	2.03677	3.33322
Dengue / QC	_YTLNKNSLK_	P04114	-0.688605	0.688605	0.0101917	0.00691184	8	P04114	APOB	Apolipoprotein B-100	APOB_HUMAN	1	-37.9547	0.620453	Dengue	QC	NaN	NaN	NaN	1.34399	0.0764782
Dengue / QC	_RLMQC[Carbamidomethyl (C)]LPNPEDVK_	P04003	0.482177	0.482177	0.216424	0.0914714	110	P04003	C4BPA	C4b-binding protein alpha chain	C4BPA_HUMAN	1	39.685	1.39685	Dengue	QC	NaN	NaN	NaN	13.1034	1.26661
Dengue / QC	_SSDANLYR_	J3KNB4;P49913	-3.08721	3.08721	0.150068	0.0677962	50	J3KNB4;P49913	CAMP	Cathelicidin antimicrobial peptide	J3KNB4_HUMAN;CAMP_HUMAN	1	-88.2333	0.117667	Dengue	QC	NaN	NaN	NaN	8.34361	1.01415
Dengue / QC	_VNDESTEGK_	P04114	-0.465199	0.465199	0.401837	0.151039	44	P04114	APOB	Apolipoprotein B-100	APOB_HUMAN	1	-27.5629	0.724371	Dengue	QC	NaN	NaN	NaN	2.27656	1.55304
Dengue / QC	_DKC[Carbamidomethyl (C)]EPLEKQHEK_	P19652	-1.55359	1.55359	0.0358486	0.0204212	76	P19652	ORM2	Alpha-1-acid glycoprotein 2	A1AG2_HUMAN	1	-65.9339	0.340661	Dengue	QC	NaN	NaN	NaN	19.9127	0.677938
Dengue / QC	_DGTVLC[Carbamidomethyl (C)]ELINALYPEGQAPVK_	P37802;X6RJP6	-1.62125	1.62125	0.000116337	0.000136159	14	P37802;X6RJP6	TAGLN2	Transgelin-2;Transgelin-2 (Fragment)	TAGL2_HUMAN;X6RJP6_HUMAN	1	-67.4947	0.325053	Dengue	QC	NaN	NaN	NaN	7.47224	0.205775
Dengue / QC	_VT[Phospho (STY)]KC[Carbamidomethyl (C)]C[Carbamidomethyl (C)]T[Phospho (STY)]ES[Phospho (STY)]LVNR_	P02768	-0.0537409	0.0537409	0.551317	0.193887	160	P02768	ALB	Serum albumin	ALBU_HUMAN	1	-3.65651	0.963435	Dengue	QC	NaN	NaN	NaN	14.1437	2.4333
Dengue / QC	_C[Carbamidomethyl (C)]EPLEKQHEKER_	P19652	-1.26086	1.26086	0.0128158	0.00841936	70	P19652	ORM2	Alpha-1-acid glycoprotein 2	A1AG2_HUMAN	1	-58.2705	0.417295	Dengue	QC	NaN	NaN	NaN	18.1746	0.533522
Dengue / QC	_C[Carbamidomethyl (C)]VVQHTASK_	A0A0A0MS09;P01880;P01880-2	-1.51075	1.51075	0.35194	0.13586	16	A0A0A0MS09;P01880;P01880-2	IGHD	Immunoglobulin heavy constant delta (Fragment);Immunoglobulin heavy constant delta;Isoform 2 of Immunoglobulin heavy constant delta	A0A0A0MS09_HUMAN;IGHD_HUMAN;IGHD_HUMAN	1	-64.9071	0.350929	Dengue	QC	NaN	NaN	NaN	1.95131	1.20128
Dengue / QC	_AASGTTGTYQEWKDK_	P04114	0.462822	0.462822	0.238031	0.0989295	62	P04114	APOB	Apolipoprotein B-100	APOB_HUMAN	1	37.8235	1.37824	Dengue	QC	NaN	NaN	NaN	7.17755	1.11523
Dengue / QC	_QNQIAVDEIRER_	P05164;P05164-2;P05164-3	0.654615	0.654615	0.224173	0.0941676	56	P05164;P05164-2;P05164-3	MPO	Myeloperoxidase;Isoform H14 of Myeloperoxidase;Isoform H7 of Myeloperoxidase	PERM_HUMAN	1	57.4195	1.5742	Dengue	QC	NaN	NaN	NaN	8.17367	1.08141
Dengue / QC	_RSLGFC[Carbamidomethyl (C)]DTTNK_	P02745	-0.0843367	0.0843367	0.216146	0.0913737	120	P02745	C1QA	Complement C1q subcomponent subunit A	C1QA_HUMAN	1	-5.67819	0.943218	Dengue	QC	NaN	NaN	NaN	15.7438	1.0939
Dengue / QC	_SSGVPDR_	A0A075B6I0	0.131532	0.131532	0.435392	0.160854	140	A0A075B6I0	IGLV8-61	Immunoglobulin lambda variable 8-61	LV861_HUMAN	1	9.5456	1.09546	Dengue	QC	NaN	NaN	NaN	16.3069	1.75698
Dengue / QC	_M[Acetyl (Protein N-term)]VNPTVFFDIAVDGEPLGR_	P62937	0.463438	0.463438	0.395136	0.148947	14	P62937	PPIA	Peptidyl-prolyl cis-trans isomerase A	PPIA_HUMAN	1	37.8824	1.37882	Dengue	QC	NaN	NaN	NaN	2.26729	1.30225
Dengue / QC	_TLSLPELEQQQEQQQEQQQEQVQM[Oxidation (M)]LAPLES_	P06727	0.448438	0.448438	0.424724	0.15772	18	P06727	APOA4	Apolipoprotein A-IV	APOA4_HUMAN	1	36.4562	1.36456	Dengue	QC	NaN	NaN	NaN	2.12867	1.37847
Dengue / QC	_AREEHRIPER_	Q06033;Q06033-2	-1.48141	1.48141	0.0283728	0.0166848	28	Q06033;Q06033-2	ITIH3	Inter-alpha-trypsin inhibitor heavy chain H3;Isoform 2 of Inter-alpha-trypsin inhibitor heavy chain H3	ITIH3_HUMAN	1	-64.1862	0.358138	Dengue	QC	NaN	NaN	NaN	9.96848	0.51505
Dengue / QC	_DSLDKEK_	P00450	-1.57182	1.57182	0.375523	0.143096	46	P00450	CP	Ceruloplasmin	CERU_HUMAN	1	-66.3617	0.336383	Dengue	QC	NaN	NaN	NaN	1.99747	1.11063
Dengue / QC	_LLIYDASSR_	A0A0C4DH25	-1.2254	1.2254	6.07247e-09	1.85191e-08	176	A0A0C4DH25	IGKV3D-20	Immunoglobulin kappa variable 3D-20	KVD20_HUMAN	1	-57.2322	0.427678	Dengue	QC	NaN	NaN	NaN	58.6069	0.181757
Dengue / QC	_QKDNGC[Carbamidomethyl (C)]FR_	P01023	-1.21527	1.21527	0.0385694	0.0217308	48	P01023	A2M	Alpha-2-macroglobulin	A2MG_HUMAN	1	-56.9308	0.430692	Dengue	QC	NaN	NaN	NaN	8.83563	0.505143
Dengue / QC	_LKDDEVAQLKK_	P07195	-0.902737	0.902737	0.0696927	0.0357573	18	P07195	LDHB	L-lactate dehydrogenase B chain	LDHB_HUMAN	1	-46.5129	0.534871	Dengue	QC	NaN	NaN	NaN	7.01458	0.561073
Dengue / QC	_PDVYLLPPAREQLNLR_	P01871	0.895794	0.895794	0.280006	0.113458	142	P01871	IGHM	Immunoglobulin heavy constant mu	IGHM_HUMAN	1	86.0634	1.86063	Dengue	QC	NaN	NaN	NaN	16.4341	1.04373
Dengue / QC	_AEDM[Oxidation (M)]AVYYC[Carbamidomethyl (C)]TR_	A0A075B7E8	1.69007	1.69007	2.77379e-05	3.80794e-05	138	A0A075B7E8	IGHV3OR16-13	Immunoglobulin heavy variable 3/OR16-13 (non-functional) (Fragment)	A0A075B7E8_HUMAN	1	222.672	3.22672	Dengue	QC	NaN	NaN	NaN	73.4305	0.260386
Dengue / QC	_TYSDHPEK_	P00450	-1.38269	1.38269	0.0657955	0.0341035	66	P00450	CP	Ceruloplasmin	CERU_HUMAN	1	-61.6497	0.383503	Dengue	QC	NaN	NaN	NaN	11.7929	0.571333
Dengue / QC	_KQTAC[Carbamidomethyl (C)]KPEIAYAYK_	P01031	-2.67028	2.67028	0.40614	0.152299	44	P01031	C5	Complement C5	CO5_HUMAN	1	-84.2903	0.157097	Dengue	QC	NaN	NaN	NaN	4.18226	1.25039
Dengue / QC	_SQPSQPSDHHETPPAAPDRNPQNIR_	A0A087X0M8;O00533-2	-0.532159	0.532159	0.236225	0.0982782	10	A0A087X0M8;O00533-2	CHL1	Neural cell adhesion molecule L1-like protein;Isoform 2 of Neural cell adhesion molecule L1-like protein	A0A087X0M8_HUMAN;NCHL1_HUMAN	1	-30.8481	0.691519	Dengue	QC	NaN	NaN	NaN	1.14592	0.499342
Dengue / QC	_HFC[Carbamidomethyl (C)]GGALIHAR_	P20160	-1.18371	1.18371	0.0455836	0.0250867	12	P20160	AZU1	Azurocidin	CAP7_HUMAN	1	-55.9784	0.440216	Dengue	QC	NaN	NaN	NaN	3.07665	0.34878
Dengue / QC	_VLTDELK_	Q15582	-1.07553	1.07553	0.131578	0.0608386	34	Q15582	TGFBI	Transforming growth factor-beta-induced protein ig-h3	BGH3_HUMAN	1	-52.5503	0.474497	Dengue	QC	NaN	NaN	NaN	10.829	0.686019
Dengue / QC	_QSSEITR_	P01023	-1.04215	1.04215	0.102548	0.0495354	150	P01023	A2M	Alpha-2-macroglobulin	A2MG_HUMAN	1	-51.4397	0.485603	Dengue	QC	NaN	NaN	NaN	30.3115	0.643915
Dengue / QC	_YEVTVVSVR_	A0A087X0I0;A0A140T8Y3;A0A140T8Z8;A0A140TA52;P22105;P22105-3;P22105-4	1.06929	1.06929	0.630059	0.215804	94	A0A087X0I0;A0A140T8Y3;A0A140T8Z8;A0A140TA52;P22105;P22105-3;P22105-4	TNXB	Tenascin-X;Tenascin-X;Tenascin-X (Fragment);Tenascin-X;Tenascin-X;Isoform 4 of Tenascin-X;Isoform 5 of Tenascin-X	A0A087X0I0_HUMAN;A0A140T8Y3_HUMAN;A0A140T8Z8_HUMAN;A0A140TA52_HUMAN;TENX_HUMAN;TENX_HUMAN;TENX_HUMAN	1	109.839	2.09839	Dengue	QC	NaN	NaN	NaN	10.7702	2.16933
Dengue / QC	_AVM[Oxidation (M)]DDFAAFVEK_	P02768	-1.05945	1.05945	0.000507585	0.000497074	176	P02768	ALB	Serum albumin	ALBU_HUMAN	1	-52.0184	0.479816	Dengue	QC	NaN	NaN	NaN	39.3543	0.283708
Dengue / QC	_GLEWLGR_	A0A0B4J1U7	-1.04157	1.04157	8.30346e-09	2.46709e-08	176	A0A0B4J1U7	IGHV6-1	Immunoglobulin heavy variable 6-1	HV601_HUMAN	1	-51.4201	0.485799	Dengue	QC	NaN	NaN	NaN	45.5981	0.152199
Dengue / QC	_KPIWLSQM[Oxidation (M)]SC[Carbamidomethyl (C)]SGR_	O43866	0.127924	0.127924	0.00525703	0.00388785	40	O43866	CD5L	CD5 antigen-like	CD5L_HUMAN	1	9.27203	1.09272	Dengue	QC	NaN	NaN	NaN	8.07105	0.27839
Dengue / QC	_VANYFDWISYHVGRPFISQYNV_	E7ETH0;G3XAM2;P05156	0.822212	0.822212	0.299061	0.119434	48	E7ETH0;G3XAM2;P05156	CFI	Complement factor I	E7ETH0_HUMAN;G3XAM2_HUMAN;CFAI_HUMAN	1	76.8115	1.76811	Dengue	QC	NaN	NaN	NaN	6.2797	0.899529
Dengue / QC	_RSASLHLPK_	P01009	-1.11621	1.11621	0.0104224	0.00704678	70	P01009	SERPINA1	Alpha-1-antitrypsin	A1AT_HUMAN	1	-53.8696	0.461304	Dengue	QC	NaN	NaN	NaN	11.1575	0.331193
Dengue / QC	_EGVHGGLINKK_	P07737	-3.88714	3.88714	0.743217	0.244574	14	P07737	PFN1	Profilin-1	PROF1_HUMAN	1	-93.2415	0.0675854	Dengue	QC	NaN	NaN	NaN	1.03067	2.36993
Dengue / QC	_IKDC[Carbamidomethyl (C)]GQPR_	B4DPQ0	-0.848235	0.848235	0.00542621	0.00400271	38	B4DPQ0	C1R	Complement C1r subcomponent	B4DPQ0_HUMAN	1	-44.4536	0.555464	Dengue	QC	NaN	NaN	NaN	8.54297	0.266466
Dengue / QC	_IVVVTAGVR_	P07195	-1.0082	1.0082	1.05066e-05	1.58908e-05	120	P07195	LDHB	L-lactate dehydrogenase B chain	LDHB_HUMAN	1	-50.2833	0.497167	Dengue	QC	NaN	NaN	NaN	100.222	0.209417
Dengue / QC	_M[Oxidation (M)]DKVGKYPK_	P01024	-1.03652	1.03652	0.220904	0.0930242	18	P01024	C3	Complement C3	CO3_HUMAN	1	-51.2496	0.487504	Dengue	QC	NaN	NaN	NaN	4.70965	0.676603
Dengue / QC	_AKDQLTC[Carbamidomethyl (C)]NK_	P01024	-0.726202	0.726202	0.00400341	0.00306932	46	P01024	C3	Complement C3	CO3_HUMAN	1	-39.5507	0.604493	Dengue	QC	NaN	NaN	NaN	12.1893	0.268857
Dengue / QC	_AIDGINQR_	J3KNB4;P49913	0.680941	0.680941	0.584533	0.203141	74	J3KNB4;P49913	CAMP	Cathelicidin antimicrobial peptide	J3KNB4_HUMAN;CAMP_HUMAN	1	60.3185	1.60319	Dengue	QC	NaN	NaN	NaN	8.12093	1.65765
Dengue / QC	_SPGQHDGTYFGR_	P19827	1.69999	1.69999	0.511665	0.182851	20	P19827	ITIH1	Inter-alpha-trypsin inhibitor heavy chain H1	ITIH1_HUMAN	1	224.898	3.24898	Dengue	QC	NaN	NaN	NaN	2.13087	1.19268
Dengue / QC	_GTGENYR_	P00747	-0.880634	0.880634	0.0449881	0.0248237	90	P00747	PLG	Plasminogen	PLMN_HUMAN	1	-45.6871	0.543129	Dengue	QC	NaN	NaN	NaN	29.7435	0.442718
Dengue / QC	_M[Oxidation (M)]ATTM[Oxidation (M)]IQSK_	P19823	-0.357146	0.357146	0.0436332	0.0241825	8	P19823	ITIH2	Inter-alpha-trypsin inhibitor heavy chain H2	ITIH2_HUMAN	1	-21.9292	0.780708	Dengue	QC	NaN	NaN	NaN	1.87622	0.185338
Dengue / QC	_RPWNVASLIYETKGEK_	P02748	0.109157	0.109157	0.116479	0.0550796	150	P02748	C9	Complement component C9	CO9_HUMAN	1	7.85975	1.0786	Dengue	QC	NaN	NaN	NaN	19.0685	0.553526
Dengue / QC	_ETKTPEC[Carbamidomethyl (C)]PSHTQPLGVYLLTPAVQDLWLR_	A0A0A0MS09;P01880;P01880-2	-0.319171	0.319171	0.0261215	0.015543	34	A0A0A0MS09;P01880;P01880-2	IGHD	Immunoglobulin heavy constant delta (Fragment);Immunoglobulin heavy constant delta;Isoform 2 of Immunoglobulin heavy constant delta	A0A0A0MS09_HUMAN;IGHD_HUMAN;IGHD_HUMAN	1	-19.847	0.80153	Dengue	QC	NaN	NaN	NaN	17.9864	0.375188
Dengue / QC	_SSSNEEVM[Oxidation (M)]FLTVQVK_	P01023	-0.81556	0.81556	0.0199981	0.0123671	164	P01023	A2M	Alpha-2-macroglobulin	A2MG_HUMAN	1	-43.1812	0.568188	Dengue	QC	NaN	NaN	NaN	31.5417	0.370923
Dengue / QC	_VSVGGEKR_	B4E1Z4	-0.602669	0.602669	0.101431	0.0491307	72	B4E1Z4	NaN	cDNA FLJ55673, highly similar to Complement factor B (EC 3.4.21.47)	B4E1Z4_HUMAN	1	-34.1465	0.658535	Dengue	QC	NaN	NaN	NaN	11.3385	0.508851
Dengue / QC	_FLTTAKDK_	P01024	-0.569157	0.569157	0.0363234	0.020659	44	P01024	C3	Complement C3	CO3_HUMAN	1	-32.5989	0.674011	Dengue	QC	NaN	NaN	NaN	7.3723	0.352067
Dengue / QC	_VDKTVER_	P01859	-0.702392	0.702392	0.186486	0.0809282	80	P01859	IGHG2	Immunoglobulin heavy constant gamma 2	IGHG2_HUMAN	1	-38.5448	0.614552	Dengue	QC	NaN	NaN	NaN	13.9451	0.626254
Dengue / QC	_VIGSGC[Carbamidomethyl (C)]NLDSAR_	P00338;P00338-3	-0.719028	0.719028	1.34811e-05	1.98789e-05	108	P00338;P00338-3	LDHA	L-lactate dehydrogenase A chain;Isoform 3 of L-lactate dehydrogenase A chain	LDHA_HUMAN	1	-39.2494	0.607506	Dengue	QC	NaN	NaN	NaN	85.9625	0.186207
Dengue / QC	_LTVAAPPSGGPGFLSIER_	P0C0L5	-0.578517	0.578517	0.0205289	0.0126483	82	P0C0L5	C4B	Complement C4-B	CO4B_HUMAN	1	-33.0348	0.669652	Dengue	QC	NaN	NaN	NaN	66.7012	0.358022
Dengue / QC	_LMIYEGSK_	P01705	-0.791426	0.791426	0.00134006	0.00117688	148	P01705	IGLV2-23	Immunoglobulin lambda variable 2-23	LV223_HUMAN	1	-42.2227	0.577773	Dengue	QC	NaN	NaN	NaN	60.3194	0.252334
Dengue / QC	_LLIYDASSLESGVPSR_	A0A0B4J2D9;P0DP09	-0.823765	0.823765	5.0694e-08	1.28461e-07	154	A0A0B4J2D9;P0DP09	IGKV1D-13;IGKV1-13	Immunoglobulin kappa variable 1D-13;Immunoglobulin kappa variable 1-13	KVD13_HUMAN;KV113_HUMAN	1	-43.5034	0.564966	Dengue	QC	NaN	NaN	NaN	122.561	0.14606
Dengue / QC	_SREC[Carbamidomethyl (C)]NNPPPSGGGR_	P10643	-0.853283	0.853283	0.0379552	0.0214434	88	P10643	C7	Complement component C7	CO7_HUMAN	1	-44.6476	0.553524	Dengue	QC	NaN	NaN	NaN	25.0614	0.382848
Dengue / QC	_VTSGSTTTTR_	P02671	-0.838413	0.838413	0.328775	0.128708	66	P02671	FGA	Fibrinogen alpha chain	FIBA_HUMAN	1	-44.0742	0.559258	Dengue	QC	NaN	NaN	NaN	13.2066	0.823711
Dengue / QC	_GFPGIQGR_	Q15848	1.01527	1.01527	0.61912	0.21279	20	Q15848	ADIPOQ	Adiponectin	ADIPO_HUMAN	1	102.128	2.02128	Dengue	QC	NaN	NaN	NaN	1.11449	1.25206
Dengue / QC	_AVLTQKR_	O43866	-0.50308	0.50308	0.264155	0.107929	14	O43866	CD5L	CD5 antigen-like	CD5L_HUMAN	1	-29.4401	0.705599	Dengue	QC	NaN	NaN	NaN	4.06041	0.627643
Dengue / QC	_LAVTTHGLPC[Carbamidomethyl (C)]LAWASAQAK_	P00734	-0.669452	0.669452	0.0363368	0.0206646	176	P00734	F2	Prothrombin	THRB_HUMAN	1	-37.1254	0.628746	Dengue	QC	NaN	NaN	NaN	30.3194	0.370577
Dengue / QC	_GALHNYK_	P01031	-0.681411	0.681411	0.0319415	0.0184895	38	P01031	C5	Complement C5	CO5_HUMAN	1	-37.6445	0.623555	Dengue	QC	NaN	NaN	NaN	8.2491	0.31191
Dengue / QC	_TGKAAQVTIQSSGTFSSK_	P01023	-0.717966	0.717966	0.000199263	0.000218292	154	P01023	A2M	Alpha-2-macroglobulin	A2MG_HUMAN	1	-39.2046	0.607954	Dengue	QC	NaN	NaN	NaN	45.1625	0.197642
Dengue / QC	_LDAHKVLSALQAVQGLLVAQGR_	P01019	0.0318731	0.0318731	0.0365406	0.0207642	166	P01019	AGT	Angiotensinogen	ANGT_HUMAN	1	2.23386	1.02234	Dengue	QC	NaN	NaN	NaN	22.9137	0.358814
Dengue / QC	_DIASGLIGPLIIC[Carbamidomethyl (C)]K_	P00450	-0.313665	0.313665	0.0102212	0.00692942	176	P00450	CP	Ceruloplasmin	CERU_HUMAN	1	-19.5405	0.804595	Dengue	QC	NaN	NaN	NaN	30.2989	0.289971
Dengue / QC	_LTITKDTSK_	P01817	-0.70414	0.70414	0.000269629	0.000284677	90	P01817	IGHV2-5	Immunoglobulin heavy variable 2-5	HV205_HUMAN	1	-38.6192	0.613808	Dengue	QC	NaN	NaN	NaN	25.949	0.188423
Dengue / QC	_GLEWVANIK_	P01780	-0.806689	0.806689	2.36061e-09	7.90063e-09	164	P01780	IGHV3-7	Immunoglobulin heavy variable 3-7	HV307_HUMAN	1	-42.8308	0.571692	Dengue	QC	NaN	NaN	NaN	64.5748	0.113472
Dengue / QC	_SRVTISVDTSK_	P06331	-0.686402	0.686402	0.00229225	0.00188839	152	P06331	IGHV4-34	Immunoglobulin heavy variable 4-34	HV434_HUMAN	1	-37.8598	0.621402	Dengue	QC	NaN	NaN	NaN	35.1082	0.238839
Dengue / QC	_ELNELGSKK_	B4E1Z4	0.013335	0.013335	0.517044	0.184408	74	B4E1Z4	NaN	cDNA FLJ55673, highly similar to Complement factor B (EC 3.4.21.47)	B4E1Z4_HUMAN	1	0.928598	1.00929	Dengue	QC	NaN	NaN	NaN	15.0586	1.17679
Dengue / QC	_ASQSISSWLAWYQQKPGKAPK_	P01602	-0.766124	0.766124	2.23437e-05	3.1292e-05	176	P01602	IGKV1-5	Immunoglobulin kappa variable 1-5	KV105_HUMAN	1	-41.2005	0.587995	Dengue	QC	NaN	NaN	NaN	47.9818	0.165285
Dengue / QC	_LADGPGHC[Carbamidomethyl (C)]K_	O43866	-0.460111	0.460111	0.153011	0.0688639	46	O43866	CD5L	CD5 antigen-like	CD5L_HUMAN	1	-27.307	0.72693	Dengue	QC	NaN	NaN	NaN	9.30498	0.498225
Dengue / QC	_LIAPVAEEEATVPNNK_	P07195	-0.457672	0.457672	0.000574796	0.000555633	82	P07195	LDHB	L-lactate dehydrogenase B chain	LDHB_HUMAN	1	-27.184	0.72816	Dengue	QC	NaN	NaN	NaN	72.0028	0.214972
Dengue / QC	_LMIYDVSK_	P01706	-0.783927	0.783927	2.04358e-07	4.52299e-07	174	P01706	IGLV2-11	Immunoglobulin lambda variable 2-11	LV211_HUMAN	1	-41.9216	0.580784	Dengue	QC	NaN	NaN	NaN	109.484	0.139573
Dengue / QC	_EKAEAQAQYSAAVAK_	Q14624	-0.688711	0.688711	1.51867e-06	2.77654e-06	176	Q14624	ITIH4	Inter-alpha-trypsin inhibitor heavy chain H4	ITIH4_HUMAN	1	-37.9592	0.620408	Dengue	QC	NaN	NaN	NaN	41.6671	0.13731
Dengue / QC	_LVGISQPK_	A0A087WTK0;A0A087WVC6;Q12913	-0.551616	0.551616	0.0193864	0.0120398	122	A0A087WTK0;A0A087WVC6;Q12913	PTPRJ	Receptor-type tyrosine-protein phosphatase eta	A0A087WTK0_HUMAN;A0A087WVC6_HUMAN;PTPRJ_HUMAN	1	-31.7744	0.682256	Dengue	QC	NaN	NaN	NaN	28.894	0.310025
Dengue / QC	_GSEM[Oxidation (M)]VVAGK_	Q14624	-0.801711	0.801711	0.0314411	0.0182382	68	Q14624	ITIH4	Inter-alpha-trypsin inhibitor heavy chain H4	ITIH4_HUMAN	1	-42.6332	0.573668	Dengue	QC	NaN	NaN	NaN	21.3912	0.333363
Dengue / QC	_GLTSVINQK_	P07195	-0.769083	0.769083	0.0141728	0.00916581	82	P07195	LDHB	L-lactate dehydrogenase B chain	LDHB_HUMAN	1	-41.321	0.58679	Dengue	QC	NaN	NaN	NaN	70.0405	0.304743
Dengue / QC	_YSQAVPAVTEGPIPEVLK_	A0A1B0GV23;A0A1B0GVD5;A0A1B0GWE8;P07339	-0.209754	0.209754	0.00235306	0.00192967	30	A0A1B0GV23;A0A1B0GVD5;A0A1B0GWE8;P07339	CTSD	Cathepsin D	A0A1B0GV23_HUMAN;A0A1B0GVD5_HUMAN;A0A1B0GWE8_HUMAN;CATD_HUMAN	1	-13.5316	0.864684	Dengue	QC	NaN	NaN	NaN	14.4186	0.206156
Dengue / QC	_VFSNGADLSGVTEEAPLKLSK_	P01009	-0.784736	0.784736	0.000104622	0.000123779	176	P01009	SERPINA1	Alpha-1-antitrypsin	A1AT_HUMAN	1	-41.9542	0.580458	Dengue	QC	NaN	NaN	NaN	42.9103	0.177526
Dengue / QC	_ASQSVSSYLAWYQQKPGQAPR_	P04433	-0.771986	0.771986	6.53943e-05	8.15485e-05	176	P04433	IGKV3-11	Immunoglobulin kappa variable 3-11	KV311_HUMAN	1	-41.4389	0.585611	Dengue	QC	NaN	NaN	NaN	45.5978	0.172522
Dengue / QC	_VLEKDSVTLK_	A0A1W2PQB1;H0Y755;M9MML0;P08637	-0.188603	0.188603	0.349882	0.135246	30	A0A1W2PQB1;H0Y755;M9MML0;P08637	FCGR3A	Fc of IgG low affinity IIIa receptor isoform 1;Low affinity immunoglobulin gamma Fc region receptor III-A (Fragment);Low affinity immunoglobulin gamma Fc region receptor III-A;Low affinity immunoglobulin gamma Fc region receptor III-A	A0A1W2PQB1_HUMAN;H0Y755_HUMAN;M9MML0_HUMAN;FCG3A_HUMAN	1	-12.2545	0.877455	Dengue	QC	NaN	NaN	NaN	3.97675	0.707522
Dengue / QC	_QNDFNSVEEKK_	P10643	-0.408103	0.408103	0.21157	0.0897962	42	P10643	C7	Complement component C7	CO7_HUMAN	1	-24.6386	0.753614	Dengue	QC	NaN	NaN	NaN	3.792	0.495044
Dengue / QC	_LSFVKVDSHFR_	P01023	-0.705547	0.705547	4.08539e-05	5.35499e-05	170	P01023	A2M	Alpha-2-macroglobulin	A2MG_HUMAN	1	-38.679	0.61321	Dengue	QC	NaN	NaN	NaN	44.1629	0.162732
Dengue / QC	_HGGLYHENM[Oxidation (M)]R_	P08603	-0.656109	0.656109	0.144018	0.0655714	86	P08603	CFH	Complement factor H	CFAH_HUMAN	1	-36.5412	0.634588	Dengue	QC	NaN	NaN	NaN	16.1418	0.481301
Dengue / QC	_NVPLPVIAELPPKVSVFVPPRDGFFGNPR_	P01871	-0.511223	0.511223	0.00231488	0.00190269	176	P01871	IGHM	Immunoglobulin heavy constant mu	IGHM_HUMAN	1	-29.8373	0.701627	Dengue	QC	NaN	NaN	NaN	45.0538	0.227806
Dengue / QC	_NVPLPVIAELPPKVSVFVPPR_	P01871	-0.797059	0.797059	0.000826043	0.000765789	174	P01871	IGHM	Immunoglobulin heavy constant mu	IGHM_HUMAN	1	-42.4479	0.575521	Dengue	QC	NaN	NaN	NaN	45.0382	0.204081
Dengue / QC	_AETGDKVYVHLK_	P00450	-0.527863	0.527863	0.00204671	0.00170929	150	P00450	CP	Ceruloplasmin	CERU_HUMAN	1	-30.6418	0.693582	Dengue	QC	NaN	NaN	NaN	26.1335	0.209509
Dengue / QC	_GPGEDFR_	P41222	-1.24224	1.24224	0.427057	0.158373	32	P41222	PTGDS	Prostaglandin-H2 D-isomerase	PTGDS_HUMAN	1	-57.7285	0.422715	Dengue	QC	NaN	NaN	NaN	3.17505	0.787561
Dengue / QC	_AVGNLRK_	P02787	-0.715674	0.715674	0.218813	0.0923039	90	P02787	TF	Serotransferrin	TRFE_HUMAN	1	-39.1079	0.608921	Dengue	QC	NaN	NaN	NaN	16.364	0.559625
Dengue / QC	_RTTVM[Oxidation (M)]VK_	P01023	0.533053	0.533053	0.233703	0.0974072	30	P01023	A2M	Alpha-2-macroglobulin	A2MG_HUMAN	1	44.6988	1.44699	Dengue	QC	NaN	NaN	NaN	14.1985	0.57512
Dengue / QC	_TM[Oxidation (M)]SGLEC[Carbamidomethyl (C)]QAWDSQSPHAHGYIPSKFPNK_	P00747	-1.19188	1.19188	0.180248	0.0787604	38	P00747	PLG	Plasminogen	PLMN_HUMAN	1	-56.2267	0.437733	Dengue	QC	NaN	NaN	NaN	3.72537	0.43401
Dengue / QC	_YGIDWASGR_	O75636	-0.69366	0.69366	5.86153e-11	2.67149e-10	172	O75636	FCN3	Ficolin-3	FCN3_HUMAN	1	-38.1717	0.618283	Dengue	QC	NaN	NaN	NaN	59.3116	0.0893437
Dengue / QC	_LLIYDASNLETGVPSR_	P01593;P01594	-0.797629	0.797629	9.64676e-07	1.84372e-06	176	P01593;P01594	IGKV1D-33;IGKV1-33	Immunoglobulin kappa variable 1D-33;Immunoglobulin kappa variable 1-33	KVD33_HUMAN;KV133_HUMAN	1	-42.4706	0.575294	Dengue	QC	NaN	NaN	NaN	55.5964	0.128952
Dengue / QC	_KPGESLK_	A0A0C4DH38	-0.682081	0.682081	0.056134	0.0298079	78	A0A0C4DH38	IGHV5-51	Immunoglobulin heavy variable 5-51	HV551_HUMAN	1	-37.6734	0.623266	Dengue	QC	NaN	NaN	NaN	16.5358	0.343321
Dengue / QC	_C[Carbamidomethyl (C)]TKPDLSNGYISDVK_	P05160	-1.73017	1.73017	0.566885	0.198382	32	P05160	F13B	Coagulation factor XIII B chain	F13B_HUMAN	1	-69.8583	0.301417	Dengue	QC	NaN	NaN	NaN	2.0418	1.03824
Dengue / QC	_LVPPM[Oxidation (M)]EEDYPQFGSPK_	P08697	-0.0683701	0.0683701	0.385466	0.146051	18	P08697	SERPINF2	Alpha-2-antiplasmin	A2AP_HUMAN	1	-4.62851	0.953715	Dengue	QC	NaN	NaN	NaN	3.51906	0.709665
Dengue / QC	_YASQSFSGVPSR_	A0A0C4DH24	-0.713787	0.713787	2.66635e-07	5.77291e-07	150	A0A0C4DH24	IGKV6-21	Immunoglobulin kappa variable 6-21	KV621_HUMAN	1	-39.0282	0.609718	Dengue	QC	NaN	NaN	NaN	99.6284	0.127153
Dengue / QC	_C[Carbamidomethyl (C)]PAPELLGGPSVFLFPPKPK_	P01860	-0.49192	0.49192	0.0258971	0.0154287	176	P01860	IGHG3	Immunoglobulin heavy constant gamma 3	IGHG3_HUMAN	1	-28.8922	0.711078	Dengue	QC	NaN	NaN	NaN	38.5062	0.301443
Dengue / QC	_KLEQTKEALLR_	Q06033;Q06033-2	-0.705292	0.705292	0.00539034	0.0039788	72	Q06033;Q06033-2	ITIH3	Inter-alpha-trypsin inhibitor heavy chain H3;Isoform 2 of Inter-alpha-trypsin inhibitor heavy chain H3	ITIH3_HUMAN	1	-38.6682	0.613318	Dengue	QC	NaN	NaN	NaN	29.127	0.230703
Dengue / QC	_LLIYGNSNRPSGVPDR_	P01703	-0.699833	0.699833	4.05163e-05	5.31316e-05	170	P01703	IGLV1-40	Immunoglobulin lambda variable 1-40	LV140_HUMAN	1	-38.4356	0.615644	Dengue	QC	NaN	NaN	NaN	50.2943	0.153761
Dengue / QC	_VPVAVQGEDTVQSLTQGDGVAK_	P01024	-0.747309	0.747309	0.000336436	0.000346093	176	P01024	C3	Complement C3	CO3_HUMAN	1	-40.4286	0.595714	Dengue	QC	NaN	NaN	NaN	41.1872	0.173226
Dengue / QC	_SILFLGK_	P05543	-0.690152	0.690152	9.92756e-07	1.89362e-06	174	P05543	SERPINA7	Thyroxine-binding globulin	THBG_HUMAN	1	-38.0211	0.619789	Dengue	QC	NaN	NaN	NaN	44.9836	0.119353
Dengue / QC	_KPDVSHGEM[Oxidation (M)]VSGFGPIYNYKDTIVFK_	P04003	-1.36736	1.36736	0.143326	0.0653333	112	P04003	C4BPA	C4b-binding protein alpha chain	C4BPA_HUMAN	1	-61.2399	0.387601	Dengue	QC	NaN	NaN	NaN	14.7743	0.435504
Dengue / QC	_LASAYGAR_	Q08380	-0.721949	0.721949	0.388026	0.146823	44	Q08380	LGALS3BP	Galectin-3-binding protein	LG3BP_HUMAN	1	-39.3722	0.606278	Dengue	QC	NaN	NaN	NaN	11.276	0.749444
Dengue / QC	_LQLKHLSLLTTLSNR_	P02774;P02774-3	0.108621	0.108621	0.406016	0.152263	56	P02774;P02774-3	GC	Vitamin D-binding protein;Isoform 3 of Vitamin D-binding protein	VTDB_HUMAN	1	7.81969	1.0782	Dengue	QC	NaN	NaN	NaN	8.54591	0.768997
Dengue / QC	_YVTSAPMPEPQAPGR_	P01871	-0.686553	0.686553	5.52692e-09	1.70173e-08	176	P01871	IGHM	Immunoglobulin heavy constant mu	IGHM_HUMAN	1	-37.8663	0.621337	Dengue	QC	NaN	NaN	NaN	57.662	0.098128
Dengue / QC	_VSVFVPPR_	P01871	-0.666343	0.666343	5.03797e-12	2.7978e-11	176	P01871	IGHM	Immunoglobulin heavy constant mu	IGHM_HUMAN	1	-36.9898	0.630102	Dengue	QC	NaN	NaN	NaN	94.971	0.0849179
Dengue / QC	_VASYGVKPR_	B4E1Z4	-0.507888	0.507888	5.79393e-05	7.32814e-05	96	B4E1Z4	NaN	cDNA FLJ55673, highly similar to Complement factor B (EC 3.4.21.47)	B4E1Z4_HUMAN	1	-29.6749	0.703251	Dengue	QC	NaN	NaN	NaN	46.5705	0.151224
Dengue / QC	_NTLYLQM[Oxidation (M)]NSLR_	A0A0J9YVT0;P0DP02	-0.619281	0.619281	6.22878e-08	1.54714e-07	164	A0A0J9YVT0;P0DP02	IGHV3-33;IGHV3-30-3	Immunoglobulin heavy variable 3-33 (Fragment);Immunoglobulin heavy variable 3-30-3	A0A0J9YVT0_HUMAN;HVC33_HUMAN	1	-34.9005	0.650995	Dengue	QC	NaN	NaN	NaN	59.296	0.108028
Dengue / QC	_RC[Carbamidomethyl (C)]C[Carbamidomethyl (C)]QDGVTR_	P0C0L5	-0.608665	0.608665	0.045682	0.025132	48	P0C0L5	C4B	Complement C4-B	CO4B_HUMAN	1	-34.4197	0.655803	Dengue	QC	NaN	NaN	NaN	14.1638	0.303891
Dengue / QC	_EPQVYTLPPSREEM[Oxidation (M)]TK_	P01860	-0.660687	0.660687	1.90405e-07	4.25004e-07	176	P01860	IGHG3	Immunoglobulin heavy constant gamma 3	IGHG3_HUMAN	1	-36.7423	0.632577	Dengue	QC	NaN	NaN	NaN	67.8163	0.11442
Dengue / QC	_GFPSVLR_	P01871	-0.681913	0.681913	3.60521e-11	1.70649e-10	176	P01871	IGHM	Immunoglobulin heavy constant mu	IGHM_HUMAN	1	-37.6662	0.623338	Dengue	QC	NaN	NaN	NaN	78.8653	0.0861716
Dengue / QC	_QVSGPLTSK_	I3L145;P04278	0.526045	0.526045	0.330449	0.129206	54	I3L145;P04278	SHBG	Sex hormone-binding globulin	I3L145_HUMAN;SHBG_HUMAN	1	43.9976	1.43998	Dengue	QC	NaN	NaN	NaN	10.9241	0.649254
Dengue / QC	_YGTC[Carbamidomethyl (C)]IYQGR_	P59665;P59666	-0.660928	0.660928	0.000655384	0.00062433	166	P59665;P59666	DEFA1;DEFA3	Neutrophil defensin 1;Neutrophil defensin 3	DEF1_HUMAN;DEF3_HUMAN	1	-36.7529	0.632471	Dengue	QC	NaN	NaN	NaN	66.3055	0.184128
Dengue / QC	_ASQSVSSNLAWYQQK_	P01624	-0.557589	0.557589	0.00348501	0.0027181	174	P01624	IGKV3-15	Immunoglobulin kappa variable 3-15	KV315_HUMAN	1	-32.0563	0.679437	Dengue	QC	NaN	NaN	NaN	56.8566	0.215752
Dengue / QC	_LLIYDASNR_	P04433	-0.655162	0.655162	6.07315e-08	1.51688e-07	176	P04433	IGKV3-11	Immunoglobulin kappa variable 3-11	KV311_HUMAN	1	-36.4996	0.635004	Dengue	QC	NaN	NaN	NaN	47.8818	0.10264
Dengue / QC	_ETYGEM[Oxidation (M)]ADC[Carbamidomethyl (C)]C[Carbamidomethyl (C)]AK_	P02768	-0.785364	0.785364	0.00149638	0.00129661	176	P02768	ALB	Serum albumin	ALBU_HUMAN	1	-41.9794	0.580206	Dengue	QC	NaN	NaN	NaN	42.5815	0.193171
Dengue / QC	_TEGDGVYTLNDKK_	P00738	-0.560285	0.560285	0.000687368	0.00065125	176	P00738	HP	Haptoglobin	HPT_HUMAN	1	-32.1832	0.678168	Dengue	QC	NaN	NaN	NaN	43.138	0.178729
Dengue / QC	_SYTSHTNEIHK_	P10643	-0.408017	0.408017	0.229462	0.0960252	138	P10643	C7	Complement component C7	CO7_HUMAN	1	-24.6342	0.753658	Dengue	QC	NaN	NaN	NaN	14.5658	0.521174
Dengue / QC	_ALEWLAR_	A0A0C4DH43	-0.644275	0.644275	2.02151e-09	6.86123e-09	168	A0A0C4DH43	IGHV2-70D	Immunoglobulin heavy variable 2-70D	HV70D_HUMAN	1	-36.0186	0.639814	Dengue	QC	NaN	NaN	NaN	75.9268	0.0959472
Dengue / QC	_VYPGEQYTYM[Oxidation (M)]LLATEEQSPGEGDGNC[Carbamidomethyl (C)]VTR_	P00450	0.301455	0.301455	0.706916	0.235543	132	P00450	CP	Ceruloplasmin	CERU_HUMAN	1	23.2386	1.23239	Dengue	QC	NaN	NaN	NaN	14.8044	1.68494
Dengue / QC	_VTISVDTSK_	P06331	-0.617513	0.617513	5.73669e-07	1.15253e-06	174	P06331	IGHV4-34	Immunoglobulin heavy variable 4-34	HV434_HUMAN	1	-34.8207	0.651793	Dengue	QC	NaN	NaN	NaN	58.3115	0.114974
Dengue / QC	_VTISC[Carbamidomethyl (C)]SGSSSNIGNNYVSWYQQLPGTAPK_	P01701	-0.398088	0.398088	0.00859521	0.00595554	174	P01701	IGLV1-51	Immunoglobulin lambda variable 1-51	LV151_HUMAN	1	-24.1137	0.758863	Dengue	QC	NaN	NaN	NaN	28.0099	0.228177
Dengue / QC	_LSPIYNLVPVK_	P02748	-0.648976	0.648976	2.44498e-12	1.45289e-11	158	P02748	C9	Complement component C9	CO9_HUMAN	1	-36.2267	0.637733	Dengue	QC	NaN	NaN	NaN	93.3318	0.0799479
Dengue / QC	_YHFVTPLTSMVVTKPEDNEDER_	Q06033;Q06033-2	-0.584962	0.584962	0.000136126	0.000156246	166	Q06033;Q06033-2	ITIH3	Inter-alpha-trypsin inhibitor heavy chain H3;Isoform 2 of Inter-alpha-trypsin inhibitor heavy chain H3	ITIH3_HUMAN	1	-33.3333	0.666667	Dengue	QC	NaN	NaN	NaN	39.69	0.152345
Dengue / QC	_VPMM[Oxidation (M)]NSK_	P05155;P05155-3	-0.785878	0.785878	0.189468	0.0819852	32	P05155;P05155-3	SERPING1	Plasma protease C1 inhibitor;Isoform 3 of Plasma protease C1 inhibitor	IC1_HUMAN	1	-42.0001	0.579999	Dengue	QC	NaN	NaN	NaN	3.62055	0.398885
Dengue / QC	_KYSDASDC[Carbamidomethyl (C)]HGEDSQAFC[Carbamidomethyl (C)]EK_	P01023	-0.618856	0.618856	3.23162e-06	5.47298e-06	176	P01023	A2M	Alpha-2-macroglobulin	A2MG_HUMAN	1	-34.8813	0.651187	Dengue	QC	NaN	NaN	NaN	47.242	0.121807
Dengue / QC	_SIAYLQMNSLK_	A0A0A0MS15	-0.676948	0.676948	8.49442e-10	3.09815e-09	166	A0A0A0MS15	IGHV3-49	Immunoglobulin heavy variable 3-49	HV349_HUMAN	1	-37.4513	0.625487	Dengue	QC	NaN	NaN	NaN	74.7406	0.0913947
Dengue / QC	_VFSNGADLS[Phospho (STY)]GVTEEAPLK_	P01009	-0.373381	0.373381	0.372026	0.142102	120	P01009	SERPINA1	Alpha-1-antitrypsin	A1AT_HUMAN	1	-22.8029	0.771971	Dengue	QC	NaN	NaN	NaN	17.9856	0.700212
Dengue / QC	_MGVSWIR_	A0A0B4J1V2	-0.648608	0.648608	4.13807e-09	1.30759e-08	160	A0A0B4J1V2	IGHV2-26	Immunoglobulin heavy variable 2-26	HV226_HUMAN	1	-36.2105	0.637895	Dengue	QC	NaN	NaN	NaN	87.573	0.0979761
Dengue / QC	_M[Oxidation (M)]VSGFIPLKPTVK_	P01023	-0.634418	0.634418	0.0448343	0.024753	176	P01023	A2M	Alpha-2-macroglobulin	A2MG_HUMAN	1	-35.5799	0.644201	Dengue	QC	NaN	NaN	NaN	44.5084	0.308789
Dengue / QC	_QAPGKGLEWVGFIR_	A0A0A0MS15	-0.580522	0.580522	0.000114014	0.000133685	158	A0A0A0MS15	IGHV3-49	Immunoglobulin heavy variable 3-49	HV349_HUMAN	1	-33.1278	0.668722	Dengue	QC	NaN	NaN	NaN	48.2662	0.151199
Dengue / QC	_QSNNKYAASSYLSLTPEQWK_	P0DOY2	-0.565691	0.565691	0.0472068	0.0258379	176	P0DOY2	IGLC2	Immunoglobulin lambda constant 2	IGLC2_HUMAN	1	-32.4368	0.675632	Dengue	QC	NaN	NaN	NaN	44.3958	0.310893
Dengue / QC	_NVPLPVIAELPPK_	P01871	-0.691949	0.691949	0.00126991	0.00112177	174	P01871	IGHM	Immunoglobulin heavy constant mu	IGHM_HUMAN	1	-38.0983	0.619017	Dengue	QC	NaN	NaN	NaN	48.2245	0.184986
Dengue / QC	_ILDDLSPR_	Q14624	-0.612962	0.612962	4.9305e-09	1.53446e-08	176	Q14624	ITIH4	Inter-alpha-trypsin inhibitor heavy chain H4	ITIH4_HUMAN	1	-34.6147	0.653853	Dengue	QC	NaN	NaN	NaN	53.9268	0.0909604
Dengue / QC	_TEDTIFLR_	P19652	-0.605307	0.605307	4.89716e-12	2.72618e-11	174	P19652	ORM2	Alpha-1-acid glycoprotein 2	A1AG2_HUMAN	1	-34.2668	0.657332	Dengue	QC	NaN	NaN	NaN	93.1491	0.0795328
Dengue / QC	_GTEAAGAMFLEAIPM[Oxidation (M)]SIPPEVK_	P01009	-0.432008	0.432008	0.0788936	0.0397603	148	P01009	SERPINA1	Alpha-1-antitrypsin	A1AT_HUMAN	1	-25.8771	0.741229	Dengue	QC	NaN	NaN	NaN	42.5051	0.349527
Dengue / QC	_ESDWLGQSMFTC[Carbamidomethyl (C)]R_	P01871	-0.195724	0.195724	0.000797577	0.0007431	172	P01871	IGHM	Immunoglobulin heavy constant mu	IGHM_HUMAN	1	-12.6865	0.873135	Dengue	QC	NaN	NaN	NaN	65.3109	0.178593
Dengue / QC	_TNYIGHK_	P07996	-0.602435	0.602435	0.0116459	0.00775769	20	P07996	THBS1	Thrombospondin-1	TSP1_HUMAN	1	-34.1359	0.658641	Dengue	QC	NaN	NaN	NaN	14.4182	0.217404
Dengue / QC	_VSMM[Oxidation (M)]QTK_	P05546	-0.682066	0.682066	0.00333027	0.00261473	54	P05546	SERPIND1	Heparin cofactor 2	HEP2_HUMAN	1	-37.6728	0.623272	Dengue	QC	NaN	NaN	NaN	8.75454	0.156929
Dengue / QC	_SSGLPNIPVQTISR_	G3V0E5;P02786	-0.631924	0.631924	6.40512e-05	8.01682e-05	154	G3V0E5;P02786	TFRC	Transferrin receptor (P90, CD71), isoform CRA_c;Transferrin receptor protein 1	G3V0E5_HUMAN;TFR1_HUMAN	1	-35.4685	0.645315	Dengue	QC	NaN	NaN	NaN	44.9634	0.141977
Dengue / QC	_SPRPSSYK_	P00747	-0.566465	0.566465	0.167127	0.0740418	64	P00747	PLG	Plasminogen	PLMN_HUMAN	1	-32.4731	0.675269	Dengue	QC	NaN	NaN	NaN	10.478	0.418139
Dengue / QC	_SLIYAASSLQSGVPSK_	P04430	-0.588999	0.588999	0.000140273	0.000160484	170	P04430	IGKV1-16	Immunoglobulin kappa variable 1-16	KV116_HUMAN	1	-33.5196	0.664804	Dengue	QC	NaN	NaN	NaN	47.9117	0.149347
Dengue / QC	_SSLSVPYVIVPLK_	P01024	-0.527725	0.527725	0.000249566	0.000265633	176	P01024	C3	Complement C3	CO3_HUMAN	1	-30.6352	0.693648	Dengue	QC	NaN	NaN	NaN	41.2398	0.153689
Dengue / QC	_DKSKEFQLFSSPHGK_	P02787	-0.479746	0.479746	8.95435e-06	1.37521e-05	164	P02787	TF	Serotransferrin	TRFE_HUMAN	1	-28.2896	0.717104	Dengue	QC	NaN	NaN	NaN	48.1614	0.123451
Dengue / QC	_GQPLSPEK_	P01871	-0.623714	0.623714	2.04738e-06	3.63712e-06	170	P01871	IGHM	Immunoglobulin heavy constant mu	IGHM_HUMAN	1	-35.1002	0.648998	Dengue	QC	NaN	NaN	NaN	57.2056	0.115783
Dengue / QC	_LLIYGNSNRPSGVPDRFSGSK_	P01703	-0.0110927	0.0110927	0.000479411	0.000471646	136	P01703	IGLV1-40	Immunoglobulin lambda variable 1-40	LV140_HUMAN	1	-0.765938	0.992341	Dengue	QC	NaN	NaN	NaN	49.0219	0.16314
Dengue / QC	_GDTFSC[Carbamidomethyl (C)]M[Oxidation (M)]VGHEALPLAFTQK_	A0A0G2JMB2	-0.233441	0.233441	0.12153	0.0570336	162	A0A0G2JMB2	IGHA2	Immunoglobulin heavy constant alpha 2 (Fragment)	A0A0G2JMB2_HUMAN	1	-14.9397	0.850603	Dengue	QC	NaN	NaN	NaN	28.8535	0.382546
Dengue / QC	_TIC[Carbamidomethyl (C)]ESSGIWSNPSPIC[Carbamidomethyl (C)]QK_	P14151;P14151-2	-0.0127955	0.0127955	0.396641	0.149417	82	P14151;P14151-2	SELL	L-selectin;Isoform 2 of L-selectin	LYAM1_HUMAN	1	-0.882996	0.99117	Dengue	QC	NaN	NaN	NaN	10.5006	0.690289
Dengue / QC	_IYHSHIDAPK_	P00450	-0.453418	0.453418	0.000709755	0.000669931	162	P00450	CP	Ceruloplasmin	CERU_HUMAN	1	-26.9689	0.730311	Dengue	QC	NaN	NaN	NaN	46.9381	0.168079
Dengue / QC	_WLQGSQELPREK_	A0A0G2JMB2	-0.607538	0.607538	2.19428e-06	3.86241e-06	174	A0A0G2JMB2	IGHA2	Immunoglobulin heavy constant alpha 2 (Fragment)	A0A0G2JMB2_HUMAN	1	-34.3684	0.656316	Dengue	QC	NaN	NaN	NaN	75.1426	0.118315
Dengue / QC	_SGGRTEHPFTVEEFVLPKFEVQVTVPK_	P01023	-0.330086	0.330086	0.0068012	0.00487127	174	P01023	A2M	Alpha-2-macroglobulin	A2MG_HUMAN	1	-20.4511	0.795489	Dengue	QC	NaN	NaN	NaN	40.8255	0.212435
Dengue / QC	_DKC[Carbamidomethyl (C)]EPLEK_	P19652	-0.682073	0.682073	0.00283537	0.00227507	176	P19652	ORM2	Alpha-1-acid glycoprotein 2	A1AG2_HUMAN	1	-37.6731	0.623269	Dengue	QC	NaN	NaN	NaN	42.9999	0.19119
Dengue / QC	_RPWNVASLIYETK_	P02748	-0.608443	0.608443	5.18143e-07	1.04791e-06	176	P02748	C9	Complement component C9	CO9_HUMAN	1	-34.4096	0.655904	Dengue	QC	NaN	NaN	NaN	50.7963	0.10505
Dengue / QC	_NVVFVIDK_	Q14624	-0.560565	0.560565	1.12755e-06	2.11784e-06	176	Q14624	ITIH4	Inter-alpha-trypsin inhibitor heavy chain H4	ITIH4_HUMAN	1	-32.1964	0.678036	Dengue	QC	NaN	NaN	NaN	37.9229	0.104032
Dengue / QC	_NTLYLQMGSLR_	A0A075B6Q5	-0.654447	0.654447	4.51667e-06	7.42061e-06	100	A0A075B6Q5	IGHV3-64	Immunoglobulin heavy variable 3-64	HV364_HUMAN	1	-36.4681	0.635319	Dengue	QC	NaN	NaN	NaN	66.1902	0.120266
Dengue / QC	_KDNEQHVFK_	B4E1Z4	-0.456758	0.456758	0.34639	0.134103	64	B4E1Z4	NaN	cDNA FLJ55673, highly similar to Complement factor B (EC 3.4.21.47)	B4E1Z4_HUMAN	1	-27.1378	0.728622	Dengue	QC	NaN	NaN	NaN	11.7807	0.612121
Dengue / QC	_TEGDGVYTLNNEK_	P00738	-0.574361	0.574361	0.00295129	0.00235434	168	P00738	HP	Haptoglobin	HPT_HUMAN	1	-32.8416	0.671584	Dengue	QC	NaN	NaN	NaN	46.9885	0.191134
Dengue / QC	_DGNKKDC[Carbamidomethyl (C)]ELPR_	E7ETH0;G3XAM2;P05156	-0.477949	0.477949	0.232288	0.0969197	46	E7ETH0;G3XAM2;P05156	CFI	Complement factor I	E7ETH0_HUMAN;G3XAM2_HUMAN;CFAI_HUMAN	1	-28.2003	0.717997	Dengue	QC	NaN	NaN	NaN	4.76265	0.437647
Dengue / QC	_LMIYEVSK_	P01709	-0.647363	0.647363	1.88702e-06	3.38035e-06	170	P01709	IGLV2-8	Immunoglobulin lambda variable 2-8	LV208_HUMAN	1	-36.1554	0.638446	Dengue	QC	NaN	NaN	NaN	100.297	0.118056
Dengue / QC	_GVALHRPDVYLLPPAR_	P01871	-0.603183	0.603183	4.50632e-07	9.24662e-07	176	P01871	IGHM	Immunoglobulin heavy constant mu	IGHM_HUMAN	1	-34.17	0.6583	Dengue	QC	NaN	NaN	NaN	49.4067	0.102743
Dengue / QC	_SYGTRPR_	P36955	-0.621314	0.621314	0.0801865	0.0403168	58	P36955	SERPINF1	Pigment epithelium-derived factor	PEDF_HUMAN	1	-34.9921	0.650079	Dengue	QC	NaN	NaN	NaN	9.49305	0.303398
Dengue / QC	_NTLYLQMNSLR_	A0A0J9YVT0;P0DP02	-0.543155	0.543155	0.000625715	0.000599531	176	A0A0J9YVT0;P0DP02	IGHV3-33;IGHV3-30-3	Immunoglobulin heavy variable 3-33 (Fragment);Immunoglobulin heavy variable 3-30-3	A0A0J9YVT0_HUMAN;HVC33_HUMAN	1	-31.3732	0.686268	Dengue	QC	NaN	NaN	NaN	38.227	0.159121
Dengue / QC	_VVLHPNYSQVDIGLIK_	P00738	-0.497559	0.497559	0.0074198	0.00524324	174	P00738	HP	Haptoglobin	HPT_HUMAN	1	-29.1696	0.708304	Dengue	QC	NaN	NaN	NaN	35.9342	0.207922
Dengue / QC	_DASGVTFTWTPSSGK_	P01876	-0.595796	0.595796	0.000996357	0.000904496	176	P01876	IGHA1	Immunoglobulin heavy constant alpha 1	IGHA1_HUMAN	1	-33.8321	0.661679	Dengue	QC	NaN	NaN	NaN	47.1541	0.1675
Dengue / QC	_WITKQQNAQGGFSSTQDTVVALHALSK_	P01023	-0.277015	0.277015	0.0104954	0.00709033	168	P01023	A2M	Alpha-2-macroglobulin	A2MG_HUMAN	1	-17.4703	0.825297	Dengue	QC	NaN	NaN	NaN	34.8275	0.217018
Dengue / QC	_NRWEDPGK_	P01024	-0.492659	0.492659	0.000449939	0.000447149	98	P01024	C3	Complement C3	CO3_HUMAN	1	-28.9286	0.710714	Dengue	QC	NaN	NaN	NaN	36.888	0.152147
Dengue / QC	_EANYIGSDKYFHAR_	P0DJI8	-0.625838	0.625838	0.0042743	0.00324638	160	P0DJI8	SAA1	Serum amyloid A-1 protein	SAA1_HUMAN	1	-35.1957	0.648043	Dengue	QC	NaN	NaN	NaN	111.201	0.199293
Dengue / QC	_ASQGISNS[Phospho (STY)]LAWYQQKPGKAPK_	A0A0G2JRQ6	1.82352	1.82352	0.592625	0.205397	18	A0A0G2JRQ6	NaN	Uncharacterized protein (Fragment)	A0A0G2JRQ6_HUMAN	1	253.944	3.53944	Dengue	QC	NaN	NaN	NaN	2.92556	0.965217
Dengue / QC	_TDC[Carbamidomethyl (C)]PGDALFDLLR_	Q96PD5	0.0727678	0.0727678	0.145594	0.0661533	174	Q96PD5	PGLYRP2	N-acetylmuramoyl-L-alanine amidase	PGRP2_HUMAN	1	5.17325	1.05173	Dengue	QC	NaN	NaN	NaN	25.3776	0.381489
Dengue / QC	_SDDTAVYYC[Carbamidomethyl (C)]AR_	P23083	-0.572578	0.572578	0.0143562	0.00926883	176	P23083	IGHV1-2	Immunoglobulin heavy variable 1-2	HV102_HUMAN	1	-32.7586	0.672414	Dengue	QC	NaN	NaN	NaN	42.4192	0.223597
Dengue / QC	_TEDTALYYC[Carbamidomethyl (C)]AK_	A0A0B4J1X8	-0.498374	0.498374	1.54404e-08	4.33112e-08	174	A0A0B4J1X8	IGHV3-43	Immunoglobulin heavy variable 3-43	HV343_HUMAN	1	-29.2096	0.707904	Dengue	QC	NaN	NaN	NaN	92.9664	0.0919406
Dengue / QC	_GLVWVSR_	A0A075B7E8	-0.574152	0.574152	4.00339e-09	1.27149e-08	176	A0A075B7E8	IGHV3OR16-13	Immunoglobulin heavy variable 3/OR16-13 (non-functional) (Fragment)	A0A075B7E8_HUMAN	1	-32.8319	0.671681	Dengue	QC	NaN	NaN	NaN	65.7035	0.0837677
Dengue / QC	_KGET[Phospho (STY)]FS[Phospho (STY)]C[Carbamidomethyl (C)]M[Oxidation (M)]VGHEALPLAFTQK_	A0A286YEY5;P01877	-0.600474	0.600474	6.78656e-06	1.07283e-05	168	A0A286YEY5;P01877	IGHA2	Immunoglobulin heavy constant alpha 2 (Fragment);Immunoglobulin heavy constant alpha 2	A0A286YEY5_HUMAN;IGHA2_HUMAN	1	-34.0463	0.659537	Dengue	QC	NaN	NaN	NaN	66.4072	0.115391
Dengue / QC	_SASLHLPK_	P01009	-0.604975	0.604975	0.000408487	0.000410622	176	P01009	SERPINA1	Alpha-1-antitrypsin	A1AT_HUMAN	1	-34.2517	0.657483	Dengue	QC	NaN	NaN	NaN	41.2555	0.145655
Dengue / QC	_ASQSISSWLAWYQQKPGK_	P01602	-0.360205	0.360205	0.0110581	0.00741404	146	P01602	IGKV1-5	Immunoglobulin kappa variable 1-5	KV105_HUMAN	1	-22.0946	0.779054	Dengue	QC	NaN	NaN	NaN	43.9602	0.211146
Dengue / QC	_ALDLINK_	P04196	-0.530783	0.530783	4.41084e-05	5.74116e-05	160	P04196	HRG	Histidine-rich glycoprotein	HRG_HUMAN	1	-30.7821	0.692179	Dengue	QC	NaN	NaN	NaN	35.0936	0.119687
Dengue / QC	_TTIEKPVWLGFLGPIIK_	P00450	-0.449487	0.449487	0.00462822	0.00348263	162	P00450	CP	Ceruloplasmin	CERU_HUMAN	1	-26.7697	0.732303	Dengue	QC	NaN	NaN	NaN	47.1574	0.186529
Dengue / QC	_NEQVEIR_	P01024	-0.842769	0.842769	0.00124056	0.0010982	174	P01024	C3	Complement C3	CO3_HUMAN	1	-44.2427	0.557573	Dengue	QC	NaN	NaN	NaN	32.6203	0.156697
Dengue / QC	_ATWSGAVLAGR_	P04217	-0.53886	0.53886	4.06033e-08	1.04871e-07	168	P04217	A1BG	Alpha-1B-glycoprotein	A1BG_HUMAN	1	-31.1685	0.688315	Dengue	QC	NaN	NaN	NaN	49.3702	0.0853106
Dengue / QC	_AGPHC[Carbamidomethyl (C)]PTAQLIATLK_	P10720	-0.497212	0.497212	0.000329616	0.000339744	120	P10720	PF4V1	Platelet factor 4 variant	PF4V_HUMAN	1	-29.1525	0.708475	Dengue	QC	NaN	NaN	NaN	63.7904	0.145101
Dengue / QC	_QYAYWYQQKPGQAPVLVIYK_	P01717	-0.47513	0.47513	0.0005945	0.00057257	146	P01717	IGLV3-25	Immunoglobulin lambda variable 3-25	LV325_HUMAN	1	-28.0598	0.719402	Dengue	QC	NaN	NaN	NaN	88.1634	0.154384
Dengue / QC	_FFGHGAEDSLADQAANEWGR_	P0DJI8	-0.565334	0.565334	0.105159	0.0505891	162	P0DJI8	SAA1	Serum amyloid A-1 protein	SAA1_HUMAN	1	-32.4201	0.675799	Dengue	QC	NaN	NaN	NaN	63.7532	0.33461
Dengue / QC	_NYLAWYQQK_	P06312	-0.592141	0.592141	0.000415424	0.000416797	122	P06312	IGKV4-1	Immunoglobulin kappa variable 4-1	KV401_HUMAN	1	-33.6642	0.663358	Dengue	QC	NaN	NaN	NaN	49.0204	0.144991
Dengue / QC	_INSDGSSTSYADSVK_	A0A0B4J1X5	-0.595947	0.595947	0.00752848	0.00530606	160	A0A0B4J1X5	IGHV3-74	Immunoglobulin heavy variable 3-74	HV374_HUMAN	1	-33.839	0.66161	Dengue	QC	NaN	NaN	NaN	100.022	0.200989
Dengue / QC	_QPGASVKVSC[Carbamidomethyl (C)]K_	A0A0B4J1V7	-0.902337	0.902337	0.126282	0.0587818	30	A0A0B4J1V7	IGHV7-81	Immunoglobulin heavy variable 7-81 (non-functional) (Fragment)	A0A0B4J1V7_HUMAN	1	-46.4981	0.535019	Dengue	QC	NaN	NaN	NaN	8.04227	0.320464
Dengue / QC	_EQLSLLDRFTEDAKR_	P01011	-0.465527	0.465527	0.00214953	0.00178483	130	P01011	SERPINA3	Alpha-1-antichymotrypsin	AACT_HUMAN	1	-27.5794	0.724206	Dengue	QC	NaN	NaN	NaN	33.4652	0.163458
Dengue / QC	_AAANQMR_	P0C0L5	-0.401754	0.401754	0.0127525	0.00838474	16	P0C0L5	C4B	Complement C4-B	CO4B_HUMAN	1	-24.3062	0.756938	Dengue	QC	NaN	NaN	NaN	8.38734	0.172217
Dengue / QC	_ASQSVSSNLAWYQQKPGQAPR_	P01624	-0.521804	0.521804	0.000155353	0.000175144	176	P01624	IGKV3-15	Immunoglobulin kappa variable 3-15	KV315_HUMAN	1	-30.35	0.6965	Dengue	QC	NaN	NaN	NaN	50.8771	0.132523
Dengue / QC	_QVGSGVTTDQVQAEAK_	P01871	-0.576082	0.576082	0.000204733	0.000223522	174	P01871	IGHM	Immunoglobulin heavy constant mu	IGHM_HUMAN	1	-32.9217	0.670783	Dengue	QC	NaN	NaN	NaN	49.7463	0.135103
Dengue / QC	_VTSTLTIK_	P01871	-0.519649	0.519649	3.43049e-08	8.97277e-08	174	P01871	IGHM	Immunoglobulin heavy constant mu	IGHM_HUMAN	1	-30.2458	0.697542	Dengue	QC	NaN	NaN	NaN	76.2231	0.0878668
Dengue / QC	_SMEDKGMTNINDGLLR_	Q06033;Q06033-2	-0.475657	0.475657	4.67799e-05	6.05745e-05	176	Q06033;Q06033-2	ITIH3	Inter-alpha-trypsin inhibitor heavy chain H3;Isoform 2 of Inter-alpha-trypsin inhibitor heavy chain H3	ITIH3_HUMAN	1	-28.0861	0.719139	Dengue	QC	NaN	NaN	NaN	40.7017	0.117921
Dengue / QC	_LLIYGASTR_	P01624	-0.516797	0.516797	0.00201949	0.0016895	176	P01624	IGKV3-15	Immunoglobulin kappa variable 3-15	KV315_HUMAN	1	-30.1078	0.698922	Dengue	QC	NaN	NaN	NaN	37.4478	0.160974
Dengue / QC	_KPGESLR_	A0A0J9YXX1	-0.451845	0.451845	0.172714	0.0760618	88	A0A0J9YXX1	IGHV5-10-1	Immunoglobulin heavy variable 5-10-1	HV5X1_HUMAN	1	-26.8893	0.731107	Dengue	QC	NaN	NaN	NaN	20.8171	0.376166
Dengue / QC	_VSVFVPPRDGFFGNPR_	P01871	-0.563669	0.563669	0.000426575	0.000426502	176	P01871	IGHM	Immunoglobulin heavy constant mu	IGHM_HUMAN	1	-32.3421	0.676579	Dengue	QC	NaN	NaN	NaN	51.4983	0.14033
Dengue / QC	_FTC[Carbamidomethyl (C)]TVTHTDLPSPLK_	P01871	-0.559988	0.559988	2.9937e-11	1.4411e-10	176	P01871	IGHM	Immunoglobulin heavy constant mu	IGHM_HUMAN	1	-32.1692	0.678308	Dengue	QC	NaN	NaN	NaN	93.2653	0.0700785
Dengue / QC	_M[Oxidation (M)]TSNFPVDLSDYPK_	P04114	-0.189629	0.189629	0.134402	0.0619509	48	P04114	APOB	Apolipoprotein B-100	APOB_HUMAN	1	-12.3169	0.876831	Dengue	QC	NaN	NaN	NaN	10.3048	0.324581
Dengue / QC	_TGLELSRDPAGR_	P55058	-0.462176	0.462176	0.00366257	0.00283893	108	P55058	PLTP	Phospholipid transfer protein	PLTP_HUMAN	1	-27.411	0.72589	Dengue	QC	NaN	NaN	NaN	20.5094	0.16018
Dengue / QC	_AEAQAQYSAAVAK_	Q14624	-0.462338	0.462338	4.10051e-05	5.36994e-05	176	Q14624	ITIH4	Inter-alpha-trypsin inhibitor heavy chain H4	ITIH4_HUMAN	1	-27.4191	0.725809	Dengue	QC	NaN	NaN	NaN	44.319	0.115338
Dengue / QC	_SPC[Carbamidomethyl (C)]YGYQWVSEEHEEAHHTAYLVFSPSK_	P01023	-0.537008	0.537008	2.08321e-05	2.93891e-05	172	P01023	A2M	Alpha-2-macroglobulin	A2MG_HUMAN	1	-31.0801	0.689199	Dengue	QC	NaN	NaN	NaN	59.7208	0.113598
Dengue / QC	_EITALAPSTMK_	P60709	-0.386783	0.386783	0.000145284	0.000165441	172	P60709	ACTB	Actin, cytoplasmic 1	ACTB_HUMAN	1	-23.5167	0.764833	Dengue	QC	NaN	NaN	NaN	43.0812	0.125889
Dengue / QC	_FQVDNNNR_	P01023	-0.502427	0.502427	1.75108e-08	4.84823e-08	176	P01023	A2M	Alpha-2-macroglobulin	A2MG_HUMAN	1	-29.4082	0.705918	Dengue	QC	NaN	NaN	NaN	97.7949	0.085005
Dengue / QC	_VFAIPPSFASIFLTK_	P01871	-0.466627	0.466627	0.000215171	0.000232948	176	P01871	IGHM	Immunoglobulin heavy constant mu	IGHM_HUMAN	1	-27.6345	0.723655	Dengue	QC	NaN	NaN	NaN	74.9718	0.134048
Dengue / QC	_RTVAAPSVFIFPPSDEQLK_	P01834	-0.563387	0.563387	0.00138658	0.00121202	176	P01834	IGKC	Immunoglobulin kappa constant	IGKC_HUMAN	1	-32.3289	0.676711	Dengue	QC	NaN	NaN	NaN	44.6659	0.152728
Dengue / QC	_YAATSQVLLPSK_	P01871	-0.529249	0.529249	3.25212e-08	8.54107e-08	170	P01871	IGHM	Immunoglobulin heavy constant mu	IGHM_HUMAN	1	-30.7085	0.692915	Dengue	QC	NaN	NaN	NaN	138.065	0.0887632
Dengue / QC	_GSGVPDRFSGSSSGADR_	A0A075B6I1	-0.349045	0.349045	0.014128	0.00914295	100	A0A075B6I1	IGLV4-60	Immunoglobulin lambda variable 4-60	LV460_HUMAN	1	-21.4897	0.785103	Dengue	QC	NaN	NaN	NaN	66.2798	0.206227
Dengue / QC	_NMATRPYSIHAHGVQTESSTVTPTLPGETLTYVWKIPER_	P00450	-0.545415	0.545415	0.0013431	0.0011792	126	P00450	CP	Ceruloplasmin	CERU_HUMAN	1	-31.4806	0.685194	Dengue	QC	NaN	NaN	NaN	48.6558	0.152047
Dengue / QC	_KGYTQQLAFR_	P01024	-0.506531	0.506531	5.04063e-09	1.56479e-08	174	P01024	C3	Complement C3	CO3_HUMAN	1	-29.6087	0.703913	Dengue	QC	NaN	NaN	NaN	94.5761	0.0803167
Dengue / QC	_ASQSVSSSYLAWYQQKPGQAPR_	P01619	-0.476011	0.476011	0.0197046	0.0122096	176	P01619	IGKV3-20	Immunoglobulin kappa variable 3-20	KV320_HUMAN	1	-28.1037	0.718963	Dengue	QC	NaN	NaN	NaN	43.1365	0.212853
Dengue / QC	_SPLFM[Oxidation (M)]GK_	P01009	-0.486443	0.486443	0.092064	0.0453328	168	P01009	SERPINA1	Alpha-1-antitrypsin	A1AT_HUMAN	1	-28.6217	0.713783	Dengue	QC	NaN	NaN	NaN	51.6999	0.300198
Dengue / QC	_QPSSAFAAFVKR_	P01024	-0.493176	0.493176	2.02923e-05	2.87329e-05	176	P01024	C3	Complement C3	CO3_HUMAN	1	-28.9541	0.710459	Dengue	QC	NaN	NaN	NaN	56.158	0.110538
Dengue / QC	_HYYIGIIETTWDYASDHGEKK_	P00450	-0.600169	0.600169	0.00854654	0.00592925	174	P00450	CP	Ceruloplasmin	CERU_HUMAN	1	-34.0323	0.659677	Dengue	QC	NaN	NaN	NaN	38.403	0.185517
Dengue / QC	_SDVVYTDWK_	P02763	-0.497667	0.497667	7.80972e-09	2.33846e-08	176	P02763	ORM1	Alpha-1-acid glycoprotein 1	A1AG1_HUMAN	1	-29.1749	0.708251	Dengue	QC	NaN	NaN	NaN	74.8733	0.0788823
Dengue / QC	_RQGALELIKK_	P01024	-0.491219	0.491219	0.00437953	0.00331669	126	P01024	C3	Complement C3	CO3_HUMAN	1	-28.8576	0.711424	Dengue	QC	NaN	NaN	NaN	40.4331	0.169875
Dengue / QC	_GPTQEFK_	P01023	-0.534326	0.534326	0.000674656	0.000640468	160	P01023	A2M	Alpha-2-macroglobulin	A2MG_HUMAN	1	-30.9519	0.690481	Dengue	QC	NaN	NaN	NaN	57.5395	0.142374
Dengue / QC	_TTGIVM[Oxidation (M)]DSGDGVTHTVPIYEGYALPHAILR_	P60709	0.680931	0.680931	0.28991	0.116425	20	P60709	ACTB	Actin, cytoplasmic 1	ACTB_HUMAN	1	60.3174	1.60317	Dengue	QC	NaN	NaN	NaN	7.42241	0.449005
Dengue / QC	_QEINSHVEMQTK_	P05543	-0.332821	0.332821	0.000771793	0.000721758	152	P05543	SERPINA7	Thyroxine-binding globulin	THBG_HUMAN	1	-20.6017	0.793983	Dengue	QC	NaN	NaN	NaN	91.3771	0.147027
Dengue / QC	_TGLQEVEVK_	P01024	-0.480908	0.480908	0.000632939	0.000605648	170	P01024	C3	Complement C3	CO3_HUMAN	1	-28.3474	0.716526	Dengue	QC	NaN	NaN	NaN	38.729	0.137266
Dengue / QC	_DNSKNTLYLQM[Oxidation (M)]NSLR_	A0A0J9YVT0;P0DP02	-0.0422945	0.0422945	0.591241	0.204991	124	A0A0J9YVT0;P0DP02	IGHV3-33;IGHV3-30-3	Immunoglobulin heavy variable 3-33 (Fragment);Immunoglobulin heavy variable 3-30-3	A0A0J9YVT0_HUMAN;HVC33_HUMAN	1	-2.88908	0.971109	Dengue	QC	NaN	NaN	NaN	25.204	0.934896
Dengue / QC	_LLIYSNNQRPSGVPDR_	P01699	-0.510254	0.510254	0.000474462	0.000467654	168	P01699	IGLV1-44	Immunoglobulin lambda variable 1-44	LV144_HUMAN	1	-29.7901	0.702099	Dengue	QC	NaN	NaN	NaN	50.122	0.135845
Dengue / QC	_ALIYSTSNK_	P04211	-0.465444	0.465444	0.0645284	0.033519	128	P04211	IGLV7-43	Immunoglobulin lambda variable 7-43	LV743_HUMAN	1	-27.5752	0.724248	Dengue	QC	NaN	NaN	NaN	41.4039	0.267276
Dengue / QC	_LISVDTEHSNIYLQNGPDR_	P00450	-0.506008	0.506008	0.000293423	0.000306657	172	P00450	CP	Ceruloplasmin	CERU_HUMAN	1	-29.5832	0.704168	Dengue	QC	NaN	NaN	NaN	50.5403	0.130187
Dengue / QC	_SYELPDGQVITIGNER_	P60709	-0.411169	0.411169	0.0455134	0.0250584	134	P60709	ACTB	Actin, cytoplasmic 1	ACTB_HUMAN	1	-24.7986	0.752014	Dengue	QC	NaN	NaN	NaN	46.8337	0.246058
Dengue / QC	_ESGPTTYK_	P01871	-0.253223	0.253223	0.000295143	0.000308231	168	P01871	IGHM	Immunoglobulin heavy constant mu	IGHM_HUMAN	1	-16.098	0.83902	Dengue	QC	NaN	NaN	NaN	60.3744	0.130877
Dengue / QC	_FMGSSSGADR_	A0A075B6K6	-0.565971	0.565971	0.00159492	0.00137251	16	A0A075B6K6	IGLV4-3	Immunoglobulin lambda variable 4-3	LV403_HUMAN	1	-32.45	0.6755	Dengue	QC	NaN	NaN	NaN	10.4492	0.118987
Dengue / QC	_SPHPPEK_	O95445	-0.587103	0.587103	0.0501053	0.0271467	46	O95445	APOM	Apolipoprotein M	APOM_HUMAN	1	-33.4322	0.665678	Dengue	QC	NaN	NaN	NaN	9.7755	0.225038
Dengue / QC	_ADDKETC[Carbamidomethyl (C)]FAEEGK_	P02768	-0.535421	0.535421	3.49539e-07	7.3661e-07	168	P02768	ALB	Serum albumin	ALBU_HUMAN	1	-31.0042	0.689958	Dengue	QC	NaN	NaN	NaN	60.8485	0.087782
Dengue / QC	_SSGVPDRFSGSILGNK_	A0A075B6I0	-0.483766	0.483766	9.97252e-07	1.90094e-06	164	A0A075B6I0	IGLV8-61	Immunoglobulin lambda variable 8-61	LV861_HUMAN	1	-28.4891	0.715109	Dengue	QC	NaN	NaN	NaN	80.772	0.0943635
Dengue / QC	_LYGSEAFATDFQDSAAAKK_	P01011	-0.46432	0.46432	0.000727836	0.00068483	164	P01011	SERPINA3	Alpha-1-antichymotrypsin	AACT_HUMAN	1	-27.5187	0.724813	Dengue	QC	NaN	NaN	NaN	51.3526	0.138925
Dengue / QC	_EHLVQATPENLQEAR_	Q06033;Q06033-2	-0.409238	0.409238	0.00017185	0.000191239	158	Q06033;Q06033-2	ITIH3	Inter-alpha-trypsin inhibitor heavy chain H3;Isoform 2 of Inter-alpha-trypsin inhibitor heavy chain H3	ITIH3_HUMAN	1	-24.6979	0.753021	Dengue	QC	NaN	NaN	NaN	46.1778	0.122079
Dengue / QC	_NKKEFDHNSNIR_	P08603	-0.641173	0.641173	0.221032	0.0930645	66	P08603	CFH	Complement factor H	CFAH_HUMAN	1	-35.8809	0.641191	Dengue	QC	NaN	NaN	NaN	21.066	0.394377
Dengue / QC	_LQDRGPDVLTATVSGK_	Q14624	-0.495338	0.495338	7.72278e-06	1.20336e-05	174	Q14624	ITIH4	Inter-alpha-trypsin inhibitor heavy chain H4	ITIH4_HUMAN	1	-29.0605	0.709395	Dengue	QC	NaN	NaN	NaN	46.8422	0.0988601
Dengue / QC	_SRLTITK_	P01817	-0.401647	0.401647	0.0500988	0.0271467	34	P01817	IGHV2-5	Immunoglobulin heavy variable 2-5	HV205_HUMAN	1	-24.3006	0.756994	Dengue	QC	NaN	NaN	NaN	7.5487	0.213085
Dengue / QC	_QGALELIK_	P01024	-0.473769	0.473769	0.000126062	0.000146177	176	P01024	C3	Complement C3	CO3_HUMAN	1	-27.9919	0.720081	Dengue	QC	NaN	NaN	NaN	41.0002	0.116915
Dengue / QC	_TTSQVRPR_	P10720	-0.558754	0.558754	0.0647863	0.0336288	46	P10720	PF4V1	Platelet factor 4 variant	PF4V_HUMAN	1	-32.1112	0.678888	Dengue	QC	NaN	NaN	NaN	14.7911	0.248057
Dengue / QC	_GGKIEVQLKNEHTSK_	P07225	-0.51118	0.51118	0.290878	0.116747	56	P07225	PROS1	Vitamin K-dependent protein S	PROS_HUMAN	1	-29.8352	0.701648	Dengue	QC	NaN	NaN	NaN	11.0722	0.445745
Dengue / QC	_M[Oxidation (M)]GPKGEPGDPVNLLR_	O75636	-0.502065	0.502065	4.89013e-05	6.30385e-05	172	O75636	FCN3	Ficolin-3	FCN3_HUMAN	1	-29.3905	0.706095	Dengue	QC	NaN	NaN	NaN	63.743	0.113229
Dengue / QC	_SSQSVLYSSNNK_	P06312	-0.543368	0.543368	0.00014813	0.000168184	154	P06312	IGKV4-1	Immunoglobulin kappa variable 4-1	KV401_HUMAN	1	-31.3833	0.686167	Dengue	QC	NaN	NaN	NaN	80.365	0.123771
Dengue / QC	_GAYPLSIEPIGVR_	P00450	-0.537138	0.537138	5.91625e-05	7.46485e-05	176	P00450	CP	Ceruloplasmin	CERU_HUMAN	1	-31.0863	0.689137	Dengue	QC	NaN	NaN	NaN	46.9984	0.11165
Dengue / QC	_ILLQGTPVAQM[Oxidation (M)]TEDAVDAER_	P01024	-0.381371	0.381371	0.000597363	0.000575039	168	P01024	C3	Complement C3	CO3_HUMAN	1	-23.2292	0.767708	Dengue	QC	NaN	NaN	NaN	39.6824	0.132073
Dengue / QC	_SAVQGPPER_	A0A0G2JMB2	-0.559657	0.559657	0.0245966	0.0147913	174	A0A0G2JMB2	IGHA2	Immunoglobulin heavy constant alpha 2 (Fragment)	A0A0G2JMB2_HUMAN	1	-32.1537	0.678463	Dengue	QC	NaN	NaN	NaN	36.1447	0.209945
Dengue / QC	_YYVDSVK_	P01780	-0.459043	0.459043	0.00632593	0.0045786	172	P01780	IGHV3-7	Immunoglobulin heavy variable 3-7	HV307_HUMAN	1	-27.2531	0.727469	Dengue	QC	NaN	NaN	NaN	57.9889	0.173768
Dengue / QC	_LGYVTADGETSGSITC[Carbamidomethyl (C)]GK_	P08603	-0.447895	0.447895	0.00585036	0.00427948	176	P08603	CFH	Complement factor H	CFAH_HUMAN	1	-26.6888	0.733112	Dengue	QC	NaN	NaN	NaN	50.3358	0.170745
Dengue / QC	_VNHVTLSQPK_	P61769	-0.501528	0.501528	0.122657	0.0574596	98	P61769	B2M	Beta-2-microglobulin	B2MG_HUMAN	1	-29.3642	0.706358	Dengue	QC	NaN	NaN	NaN	32.2139	0.308606
Dengue / QC	_DQYELLC[Carbamidomethyl (C)]LDNTR_	P02787	-0.479185	0.479185	0.0264162	0.0156893	160	P02787	TF	Serotransferrin	TRFE_HUMAN	1	-28.2617	0.717383	Dengue	QC	NaN	NaN	NaN	42.4579	0.212461
Dengue / QC	_MYYSAVDPTK_	P00450	-0.492646	0.492646	9.24307e-05	0.000110786	158	P00450	CP	Ceruloplasmin	CERU_HUMAN	1	-28.928	0.71072	Dengue	QC	NaN	NaN	NaN	52.1251	0.115317
Dengue / QC	_YAATSQVLLPSKDVM[Oxidation (M)]QGTDEHVVC[Carbamidomethyl (C)]K_	P01871	-0.358068	0.358068	0.00300518	0.00239072	166	P01871	IGHM	Immunoglobulin heavy constant mu	IGHM_HUMAN	1	-21.9791	0.780209	Dengue	QC	NaN	NaN	NaN	69.4841	0.158727
Dengue / QC	_FSGQLNSHGC[Carbamidomethyl (C)]FYQQVK_	P01023	-0.511951	0.511951	2.14625e-05	3.01678e-05	176	P01023	A2M	Alpha-2-macroglobulin	A2MG_HUMAN	1	-29.8726	0.701274	Dengue	QC	NaN	NaN	NaN	57.9773	0.105323
Dengue / QC	_GVTFLLR_	P04217	-0.492458	0.492458	8.78335e-10	3.19546e-09	172	P04217	A1BG	Alpha-1B-glycoprotein	A1BG_HUMAN	1	-28.9187	0.710813	Dengue	QC	NaN	NaN	NaN	79.5259	0.0699875
Dengue / QC	_QIGSVYR_	P04196	-0.530724	0.530724	6.66913e-06	1.05572e-05	124	P04196	HRG	Histidine-rich glycoprotein	HRG_HUMAN	1	-30.7793	0.692207	Dengue	QC	NaN	NaN	NaN	62.8286	0.0990187
Dengue / QC	_ITDNM[Oxidation (M)]FC[Carbamidomethyl (C)]AGYKPDEGKR_	P00734	0.102848	0.102848	0.355214	0.136867	78	P00734	F2	Prothrombin	THRB_HUMAN	1	7.38912	1.07389	Dengue	QC	NaN	NaN	NaN	17.1325	0.511599
Dengue / QC	_GYGFYTK_	B4DPQ0	-0.378173	0.378173	0.00950874	0.0064991	158	B4DPQ0	C1R	Complement C1r subcomponent	B4DPQ0_HUMAN	1	-23.0589	0.769411	Dengue	QC	NaN	NaN	NaN	29.34	0.175152
Dengue / QC	_FDHVITNMNNNYEPR_	D6R934;P02746	-0.415397	0.415397	1.11329e-05	1.67676e-05	176	D6R934;P02746	C1QB	Complement C1q subcomponent subunit B	D6R934_HUMAN;C1QB_HUMAN	1	-25.0187	0.749813	Dengue	QC	NaN	NaN	NaN	38.3591	0.096149
Dengue / QC	_M[Oxidation (M)]NTVIAALSR_	P08185	-1.07182	1.07182	0.374533	0.142795	14	P08185	SERPINA6	Corticosteroid-binding globulin	CBG_HUMAN	1	-52.4283	0.475717	Dengue	QC	NaN	NaN	NaN	4.25216	0.487978
Dengue / QC	_VNKDDEEFIESNK_	P00450	-0.446221	0.446221	0.00134468	0.00117987	176	P00450	CP	Ceruloplasmin	CERU_HUMAN	1	-26.6037	0.733963	Dengue	QC	NaN	NaN	NaN	50.1374	0.14229
Dengue / QC	_TAGWNIPM[Oxidation (M)]GLLYNK_	P02787	-0.44906	0.44906	0.00393039	0.00302016	164	P02787	TF	Serotransferrin	TRFE_HUMAN	1	-26.748	0.73252	Dengue	QC	NaN	NaN	NaN	62.4223	0.161227
Dengue / QC	_QEDMKGHFSISIPVKSDIAPVAR_	P01023	-0.751916	0.751916	0.100679	0.0488209	176	P01023	A2M	Alpha-2-macroglobulin	A2MG_HUMAN	1	-40.6186	0.593814	Dengue	QC	NaN	NaN	NaN	26.287	0.283708
Dengue / QC	_SSQSLVYSDGNTYLNWFQQRPGQSPR_	P06310	-0.423105	0.423105	0.000588629	0.000567673	168	P06310	IGKV2-30	Immunoglobulin kappa variable 2-30	KV230_HUMAN	1	-25.4182	0.745818	Dengue	QC	NaN	NaN	NaN	64.8257	0.133455
Dengue / QC	_ETC[Carbamidomethyl (C)]FAEEGKK_	P02768	-0.59739	0.59739	0.115744	0.0547772	176	P02768	ALB	Serum albumin	ALBU_HUMAN	1	-33.9051	0.660949	Dengue	QC	NaN	NaN	NaN	27.5756	0.296038
Dengue / QC	_AAQVTIQSSGTFSSK_	P01023	-0.48077	0.48077	0.00478439	0.00358519	170	P01023	A2M	Alpha-2-macroglobulin	A2MG_HUMAN	1	-28.3405	0.716595	Dengue	QC	NaN	NaN	NaN	53.895	0.163217
Dengue / QC	_YYLQGAK_	Q14624	-0.321646	0.321646	0.032885	0.0189728	168	Q14624	ITIH4	Inter-alpha-trypsin inhibitor heavy chain H4	ITIH4_HUMAN	1	-19.9843	0.800157	Dengue	QC	NaN	NaN	NaN	31.2719	0.213316
Dengue / QC	_VQPYLDDFQK_	P02647	-0.397758	0.397758	0.000190781	0.000209918	166	P02647	APOA1	Apolipoprotein A-I	APOA1_HUMAN	1	-24.0963	0.759037	Dengue	QC	NaN	NaN	NaN	51.1567	0.118307
Dengue / QC	_AGVETTKPSK_	A0A0B4J231;B9A064	0.00268138	0.00268138	0.365868	0.14026	104	A0A0B4J231;B9A064	IGLL5	Immunoglobulin lambda-like polypeptide 5	A0A0B4J231_HUMAN;IGLL5_HUMAN	1	0.186032	1.00186	Dengue	QC	NaN	NaN	NaN	21.6781	0.514416
Dengue / QC	_GPDVLTATVSGK_	Q14624	-0.475712	0.475712	0.000905873	0.000832174	162	Q14624	ITIH4	Inter-alpha-trypsin inhibitor heavy chain H4	ITIH4_HUMAN	1	-28.0888	0.719112	Dengue	QC	NaN	NaN	NaN	50.2923	0.13445
Dengue / QC	_ASSFLGEK_	P0C0L5	-0.479561	0.479561	0.000630206	0.000603233	128	P0C0L5	C4B	Complement C4-B	CO4B_HUMAN	1	-28.2804	0.717196	Dengue	QC	NaN	NaN	NaN	61.9626	0.130966
Dengue / QC	_ETLEDTRDR_	P04114	-0.334162	0.334162	0.10193	0.0493074	54	P04114	APOB	Apolipoprotein B-100	APOB_HUMAN	1	-20.6755	0.793245	Dengue	QC	NaN	NaN	NaN	6.54974	0.248099
Dengue / QC	_LVGGDNLC[Carbamidomethyl (C)]SGR_	O43866	-0.433011	0.433011	0.000131098	0.000151273	166	O43866	CD5L	CD5 antigen-like	CD5L_HUMAN	1	-25.9286	0.740714	Dengue	QC	NaN	NaN	NaN	66.1232	0.115952
Dengue / QC	_DNSKNTLYLQMNSLR_	A0A0J9YVT0;P0DP02	-0.513912	0.513912	9.58352e-07	1.83508e-06	176	A0A0J9YVT0;P0DP02	IGHV3-33;IGHV3-30-3	Immunoglobulin heavy variable 3-33 (Fragment);Immunoglobulin heavy variable 3-30-3	A0A0J9YVT0_HUMAN;HVC33_HUMAN	1	-29.9679	0.700321	Dengue	QC	NaN	NaN	NaN	76.0134	0.0882715
Dengue / QC	_LVVLPFPK_	Q9UGM5	-0.51413	0.51413	3.35754e-06	5.66462e-06	174	Q9UGM5	FETUB	Fetuin-B	FETUB_HUMAN	1	-29.9785	0.700215	Dengue	QC	NaN	NaN	NaN	58.5285	0.0916332
Dengue / QC	_RGPGGAWAAEVISNAR_	P0DJI9	-0.467289	0.467289	0.0162888	0.0103429	140	P0DJI9	SAA2	Serum amyloid A-2 protein	SAA2_HUMAN	1	-27.6677	0.723323	Dengue	QC	NaN	NaN	NaN	109.477	0.192704
Dengue / QC	_ILGGHLDAK_	P00738	-0.397924	0.397924	0.0042097	0.00320322	176	P00738	HP	Haptoglobin	HPT_HUMAN	1	-24.105	0.75895	Dengue	QC	NaN	NaN	NaN	55.4775	0.157352
Dengue / QC	_AEDTALYYC[Carbamidomethyl (C)]AK_	P01782	-0.472583	0.472583	0.000298118	0.000310888	176	P01782	IGHV3-9	Immunoglobulin heavy variable 3-9	HV309_HUMAN	1	-27.9327	0.720673	Dengue	QC	NaN	NaN	NaN	54.7987	0.121569
Dengue / QC	_LLIYDNNKRPSGIPDR_	P01701	-0.481167	0.481167	2.77839e-06	4.77526e-06	164	P01701	IGLV1-51	Immunoglobulin lambda variable 1-51	LV151_HUMAN	1	-28.3602	0.716398	Dengue	QC	NaN	NaN	NaN	83.3959	0.0933642
Dengue / QC	_EFQLFSSPHGKDLLFK_	P02787	-0.405588	0.405588	0.0159704	0.0101676	176	P02787	TF	Serotransferrin	TRFE_HUMAN	1	-24.5071	0.754929	Dengue	QC	NaN	NaN	NaN	42.3278	0.186749
Dengue / QC	_TVAAPSVFIFPPSDEQLK_	P01834	-0.519594	0.519594	3.14694e-05	4.25641e-05	176	P01834	IGKC	Immunoglobulin kappa constant	IGKC_HUMAN	1	-30.2432	0.697568	Dengue	QC	NaN	NaN	NaN	63.4723	0.104542
Dengue / QC	_TPVSDRVTKC[Carbamidomethyl (C)]C[Carbamidomethyl (C)]TESLVNR_	P02768	-0.59925	0.59925	0.314245	0.124328	118	P02768	ALB	Serum albumin	ALBU_HUMAN	1	-33.9903	0.660097	Dengue	QC	NaN	NaN	NaN	22.512	0.45499
Dengue / QC	_LVDGKGVPIPNKVIFIR_	P01023	-0.468654	0.468654	0.00630958	0.00456849	176	P01023	A2M	Alpha-2-macroglobulin	A2MG_HUMAN	1	-27.7361	0.722639	Dengue	QC	NaN	NaN	NaN	59.4629	0.165358
Dengue / QC	_KAEEEHLGILGPQLHADVGDK_	P00450	-0.445293	0.445293	0.000853932	0.000789614	152	P00450	CP	Ceruloplasmin	CERU_HUMAN	1	-26.5565	0.734435	Dengue	QC	NaN	NaN	NaN	39.5553	0.129594
Dengue / QC	_GPSVFPLAPSSK_	P01857	-0.403305	0.403305	0.00010906	0.000128554	176	P01857	IGHG1	Immunoglobulin heavy constant gamma 1	IGHG1_HUMAN	1	-24.3876	0.756124	Dengue	QC	NaN	NaN	NaN	48.4582	0.110863
Dengue / QC	_VQVLLGAHSLSQPEPSKR_	K7ERG9;P00746	-0.0683104	0.0683104	0.139541	0.063896	20	K7ERG9;P00746	CFD	Complement factor D	K7ERG9_HUMAN;CFAD_HUMAN	1	-4.62457	0.953754	Dengue	QC	NaN	NaN	NaN	5.74873	0.272255
Dengue / QC	_GPSVFPLAPC[Carbamidomethyl (C)]SR_	P01861	-0.399404	0.399404	0.00245199	0.00200084	176	P01861	IGHG4	Immunoglobulin heavy constant gamma 4	IGHG4_HUMAN	1	-24.1829	0.758171	Dengue	QC	NaN	NaN	NaN	41.988	0.14464
Dengue / QC	_WC[Carbamidomethyl (C)]ALSHHER_	P02787	-0.413136	0.413136	0.00445771	0.00336927	176	P02787	TF	Serotransferrin	TRFE_HUMAN	1	-24.9011	0.750989	Dengue	QC	NaN	NaN	NaN	40.0823	0.154548
Dengue / QC	_GLEWIGEINHSGSTNYNPSLK_	P06331	-0.7616	0.7616	0.119596	0.0563139	72	P06331	IGHV4-34	Immunoglobulin heavy variable 4-34	HV434_HUMAN	1	-41.0158	0.589842	Dengue	QC	NaN	NaN	NaN	37.5981	0.2918
Dengue / QC	_DSGVPDRFSGSGSGTDFTLK_	P06310	-0.493084	0.493084	2.48542e-09	8.28952e-09	176	P06310	IGKV2-30	Immunoglobulin kappa variable 2-30	KV230_HUMAN	1	-28.9496	0.710504	Dengue	QC	NaN	NaN	NaN	97.6011	0.0705381
Dengue / QC	_DVVQITC[Carbamidomethyl (C)]LDGFEVVEGR_	P09871	-0.304496	0.304496	0.059053	0.0311288	116	P09871	C1S	Complement C1s subcomponent	C1S_HUMAN	1	-19.0275	0.809725	Dengue	QC	NaN	NaN	NaN	24.7098	0.233712
Dengue / QC	_SVHWYQQKPGQAPVLVVYDDSDRPSGIPER_	P80748	-0.463866	0.463866	0.00252484	0.00205419	148	P80748	IGLV3-21	Immunoglobulin lambda variable 3-21	LV321_HUMAN	1	-27.4959	0.725041	Dengue	QC	NaN	NaN	NaN	96.6069	0.149101
Dengue / QC	_SDVM[Oxidation (M)]YTDWK_	P19652	-0.451845	0.451845	2.97916e-06	5.08723e-06	166	P19652	ORM2	Alpha-1-acid glycoprotein 2	A1AG2_HUMAN	1	-26.8893	0.731107	Dengue	QC	NaN	NaN	NaN	63.2274	0.0899889
Dengue / QC	_VHQYFNVELIQPGAVK_	P01024	-0.440892	0.440892	0.00382456	0.00294787	176	P01024	C3	Complement C3	CO3_HUMAN	1	-26.3321	0.736679	Dengue	QC	NaN	NaN	NaN	43.969	0.151024
Dengue / QC	_RQDGSVDFFR_	O75636	-0.419229	0.419229	0.000130596	0.000150768	160	O75636	FCN3	Ficolin-3	FCN3_HUMAN	1	-25.2176	0.747824	Dengue	QC	NaN	NaN	NaN	46.6334	0.110419
Dengue / QC	_M[Oxidation (M)]C[Carbamidomethyl (C)]PQLQQYEMHGPEGLR_	P01023	0.0715526	0.0715526	0.234267	0.0976111	174	P01023	A2M	Alpha-2-macroglobulin	A2MG_HUMAN	1	5.0847	1.05085	Dengue	QC	NaN	NaN	NaN	44.1419	0.381249
Dengue / QC	_FSGSGSGTDFTLTISR_	P01619	-0.394693	0.394693	0.00872048	0.00602962	176	P01619	IGKV3-20	Immunoglobulin kappa variable 3-20	KV320_HUMAN	1	-23.9349	0.760651	Dengue	QC	NaN	NaN	NaN	46.2115	0.167418
Dengue / QC	_KYTHLSC[Carbamidomethyl (C)]DK_	E7ETH0;G3XAM2;P05156	-0.18579	0.18579	0.372512	0.142222	28	E7ETH0;G3XAM2;P05156	CFI	Complement factor I	E7ETH0_HUMAN;G3XAM2_HUMAN;CFAI_HUMAN	1	-12.0833	0.879167	Dengue	QC	NaN	NaN	NaN	4.19452	0.459613
Dengue / QC	_TAAQNLYEK_	A0A024R0T9;K7ER74;P02655	-0.254956	0.254956	0.0068419	0.00489556	106	A0A024R0T9;K7ER74;P02655	APOC4-APOC2;APOC4-APOC2;APOC2	Apolipoprotein C-II isoform 1;APOC4-APOC2 readthrough (NMD candidate);Apolipoprotein C-II	A0A024R0T9_HUMAN;K7ER74_HUMAN;APOC2_HUMAN	1	-16.1987	0.838013	Dengue	QC	NaN	NaN	NaN	31.2396	0.157927
Dengue / QC	_ALQDQLVLVAAK_	P01019	-0.476347	0.476347	0.00714526	0.00507986	174	P01019	AGT	Angiotensinogen	ANGT_HUMAN	1	-28.1205	0.718795	Dengue	QC	NaN	NaN	NaN	51.7986	0.163206
Dengue / QC	_TEHYEEQIEAFK_	P02748	-0.450107	0.450107	1.13775e-05	1.70953e-05	170	P02748	C9	Complement component C9	CO9_HUMAN	1	-26.8011	0.731989	Dengue	QC	NaN	NaN	NaN	51.2106	0.0939888
Dengue / QC	_TEVIPPLIENR_	P04114	-0.452406	0.452406	0.000728886	0.000685521	176	P04114	APOB	Apolipoprotein B-100	APOB_HUMAN	1	-26.9177	0.730823	Dengue	QC	NaN	NaN	NaN	45.9718	0.126157
Dengue / QC	_SASNM[Oxidation (M)]AIVDVK_	P01023	-0.433185	0.433185	0.000150983	0.00017112	176	P01023	A2M	Alpha-2-macroglobulin	A2MG_HUMAN	1	-25.9375	0.740625	Dengue	QC	NaN	NaN	NaN	58.0271	0.112509
Dengue / QC	_YDVENC[Carbamidomethyl (C)]LANKVDLSFSPSQSLPASHAHLR_	P01023	-0.46172	0.46172	0.0348008	0.0199148	176	P01023	A2M	Alpha-2-macroglobulin	A2MG_HUMAN	1	-27.388	0.72612	Dengue	QC	NaN	NaN	NaN	46.3915	0.207507
Dengue / QC	_VFSNGADLSGVTEEAPLK_	P01009	-0.52607	0.52607	1.03341e-05	1.56585e-05	168	P01009	SERPINA1	Alpha-1-antitrypsin	A1AT_HUMAN	1	-30.5556	0.694444	Dengue	QC	NaN	NaN	NaN	104.968	0.097025
Dengue / QC	_KNPIVFIR_	A0A087WUF9;F1T0D4;O00341	-0.360974	0.360974	0.00393603	0.00302409	142	A0A087WUF9;F1T0D4;O00341	SLC1A7	Amino acid transporter;Amino acid transporter;Excitatory amino acid transporter 5	A0A087WUF9_HUMAN;F1T0D4_HUMAN;EAA5_HUMAN	1	-22.1361	0.778639	Dengue	QC	NaN	NaN	NaN	43.1038	0.147531
Dengue / QC	_DNSVHWERPQKPK_	P01023	-0.576295	0.576295	0.0040902	0.00312879	176	P01023	A2M	Alpha-2-macroglobulin	A2MG_HUMAN	1	-32.9316	0.670684	Dengue	QC	NaN	NaN	NaN	49.0543	0.149225
Dengue / QC	_EKLTALTKK_	P04114	-0.586574	0.586574	0.199917	0.0856683	32	P04114	APOB	Apolipoprotein B-100	APOB_HUMAN	1	-33.4078	0.665922	Dengue	QC	NaN	NaN	NaN	13.1489	0.332968
Dengue / QC	_LSSVTAADTAVYYC[Carbamidomethyl (C)]AR_	A0A075B6R2	-0.461985	0.461985	9.43667e-05	0.000112733	176	A0A075B6R2	IGHV4-4	Immunoglobulin heavy variable 4-4	HV404_HUMAN	1	-27.4014	0.725986	Dengue	QC	NaN	NaN	NaN	71.4516	0.108589
Dengue / QC	_VQVVAGKK_	P01042	-0.360585	0.360585	0.243686	0.100883	70	P01042	KNG1	Kininogen-1	KNG1_HUMAN	1	-22.1151	0.778849	Dengue	QC	NaN	NaN	NaN	16.2575	0.370846
Dengue / QC	_ELLESYIDGR_	P00734	-0.419189	0.419189	0.000120061	0.000139978	176	P00734	F2	Prothrombin	THRB_HUMAN	1	-25.2155	0.747845	Dengue	QC	NaN	NaN	NaN	45.2214	0.106409
Dengue / QC	_AVLTIDEK_	P01009	-0.446913	0.446913	3.74695e-07	7.83045e-07	176	P01009	SERPINA1	Alpha-1-antitrypsin	A1AT_HUMAN	1	-26.6389	0.733611	Dengue	QC	NaN	NaN	NaN	68.6322	0.0795327
Dengue / QC	_GYHLVGKK_	P20851;P20851-2	-0.314549	0.314549	0.452161	0.165638	52	P20851;P20851-2	C4BPB	C4b-binding protein beta chain;Isoform 2 of C4b-binding protein beta chain	C4BPB_HUMAN	1	-19.5898	0.804102	Dengue	QC	NaN	NaN	NaN	10.4691	0.572075
Dengue / QC	_FNKNNEGTYYSPNYNPQSR_	P00450	-0.452376	0.452376	0.0219667	0.0134352	174	P00450	CP	Ceruloplasmin	CERU_HUMAN	1	-26.9162	0.730838	Dengue	QC	NaN	NaN	NaN	38.7715	0.187083
Dengue / QC	_NVHSGSTFFK_	Q14624	-0.180477	0.180477	0.0470833	0.0257826	92	Q14624	ITIH4	Inter-alpha-trypsin inhibitor heavy chain H4	ITIH4_HUMAN	1	-11.7589	0.882411	Dengue	QC	NaN	NaN	NaN	24.9757	0.213244
Dengue / QC	_SGGRTEHPFTVEEFVLPK_	P01023	-0.428856	0.428856	2.25371e-07	4.9501e-07	176	P01023	A2M	Alpha-2-macroglobulin	A2MG_HUMAN	1	-25.7149	0.742851	Dengue	QC	NaN	NaN	NaN	65.1053	0.0768488
Dengue / QC	_SGSDEVQVGQQR_	P01024	-0.440248	0.440248	0.00760643	0.00535283	176	P01024	C3	Complement C3	CO3_HUMAN	1	-26.2992	0.737008	Dengue	QC	NaN	NaN	NaN	45.9777	0.159123
Dengue / QC	_RPSGVPDRFSGSK_	P01706	-0.378612	0.378612	0.0196564	0.0121823	132	P01706	IGLV2-11	Immunoglobulin lambda variable 2-11	LV211_HUMAN	1	-23.0823	0.769177	Dengue	QC	NaN	NaN	NaN	60.2553	0.185234
Dengue / QC	_DQPRPAFSAIRR_	P02745	-0.278733	0.278733	0.0137906	0.00897291	84	P02745	C1QA	Complement C1q subcomponent subunit A	C1QA_HUMAN	1	-17.5685	0.824315	Dengue	QC	NaN	NaN	NaN	21.3623	0.165438
Dengue / QC	_LMIYEVSNRPSGVSNR_	P01704	-0.451751	0.451751	0.00106407	0.000959474	146	P01704	IGLV2-14	Immunoglobulin lambda variable 2-14	LV214_HUMAN	1	-26.8845	0.731155	Dengue	QC	NaN	NaN	NaN	83.6448	0.130706
Dengue / QC	_LMIYEVSNRPSGVPDR_	A0A075B6J9	-0.351572	0.351572	0.00015452	0.00017441	122	A0A075B6J9	IGLV2-18	Immunoglobulin lambda variable 2-18	LV218_HUMAN	1	-21.627	0.78373	Dengue	QC	NaN	NaN	NaN	82.6373	0.111727
Dengue / QC	_VHTEC[Carbamidomethyl (C)]C[Carbamidomethyl (C)]HGDLLEC[Carbamidomethyl (C)]ADDR_	P02768	-0.44528	0.44528	0.00127989	0.00112989	176	P02768	ALB	Serum albumin	ALBU_HUMAN	1	-26.5558	0.734442	Dengue	QC	NaN	NaN	NaN	52.193	0.129641
Dengue / QC	_RGPGGVWAAEAISDAR_	P0DJI8	-0.482433	0.482433	0.00219375	0.00181762	162	P0DJI8	SAA1	Serum amyloid A-1 protein	SAA1_HUMAN	1	-28.423	0.71577	Dengue	QC	NaN	NaN	NaN	154.907	0.141648
Dengue / QC	_LMNIFLK_	P01024	-0.41633	0.41633	0.000156875	0.000176466	176	P01024	C3	Complement C3	CO3_HUMAN	1	-25.0672	0.749328	Dengue	QC	NaN	NaN	NaN	59.1229	0.108817
Dengue / QC	_NSLYLQMNSLR_	P01782	-0.484137	0.484137	0.00225453	0.00186131	176	P01782	IGHV3-9	Immunoglobulin heavy variable 3-9	HV309_HUMAN	1	-28.5076	0.714924	Dengue	QC	NaN	NaN	NaN	87.2815	0.139433
Dengue / QC	_AVISPGFDVFAK_	B4E1Z4	-0.354705	0.354705	0.000130757	0.000150924	164	B4E1Z4	NaN	cDNA FLJ55673, highly similar to Complement factor B (EC 3.4.21.47)	B4E1Z4_HUMAN	1	-21.7971	0.782029	Dengue	QC	NaN	NaN	NaN	61.3083	0.107368
Dengue / QC	_NADYSYSVWK_	P01031	-0.34339	0.34339	0.214101	0.090691	54	P01031	C5	Complement C5	CO5_HUMAN	1	-21.1813	0.788187	Dengue	QC	NaN	NaN	NaN	3.3408	0.286025
Dengue / QC	_RLYGSEAFATDFQDSAAAK_	P01011	-0.45398	0.45398	0.00088348	0.000813416	170	P01011	SERPINA3	Alpha-1-antichymotrypsin	AACT_HUMAN	1	-26.9974	0.730026	Dengue	QC	NaN	NaN	NaN	57.717	0.124832
Dengue / QC	_GHGATNDLTFTEEVDMKEMEK_	Q06033;Q06033-2	-0.409154	0.409154	0.0166059	0.0105108	128	Q06033;Q06033-2	ITIH3	Inter-alpha-trypsin inhibitor heavy chain H3;Isoform 2 of Inter-alpha-trypsin inhibitor heavy chain H3	ITIH3_HUMAN	1	-24.6935	0.753065	Dengue	QC	NaN	NaN	NaN	48.124	0.17619
Dengue / QC	_AATVGSLAGQPLQER_	P02649	-0.404413	0.404413	0.00484209	0.00362372	176	P02649	APOE	Apolipoprotein E	APOE_HUMAN	1	-24.4456	0.755544	Dengue	QC	NaN	NaN	NaN	45.5274	0.147439
Dengue / QC	_FPEVDVLTK_	P04114	-0.464584	0.464584	9.25052e-06	1.41768e-05	172	P04114	APOB	Apolipoprotein B-100	APOB_HUMAN	1	-27.532	0.72468	Dengue	QC	NaN	NaN	NaN	58.2155	0.089801
Dengue / QC	_DNSKNSLYLQMNSLR_	A0A0B4J1X8	-0.323497	0.323497	6.44674e-05	8.05494e-05	172	A0A0B4J1X8	IGHV3-43	Immunoglobulin heavy variable 3-43	HV343_HUMAN	1	-20.0869	0.799131	Dengue	QC	NaN	NaN	NaN	59.2185	0.101369
Dengue / QC	_VDNALQSGNSQESVTEQDSK_	P01834	-0.40591	0.40591	1.32832e-06	2.46048e-06	176	P01834	IGKC	Immunoglobulin kappa constant	IGKC_HUMAN	1	-24.524	0.75476	Dengue	QC	NaN	NaN	NaN	70.0642	0.0823639
Dengue / QC	_RPSGIPDRFSGSK_	P01701	-0.442139	0.442139	0.00287715	0.00230539	106	P01701	IGLV1-51	Immunoglobulin lambda variable 1-51	LV151_HUMAN	1	-26.3957	0.736043	Dengue	QC	NaN	NaN	NaN	53.4507	0.139413
Dengue / QC	_ATVLNYLPK_	P01023	-0.462151	0.462151	8.03944e-07	1.56609e-06	172	P01023	A2M	Alpha-2-macroglobulin	A2MG_HUMAN	1	-27.4097	0.725903	Dengue	QC	NaN	NaN	NaN	108.471	0.0831296
Dengue / QC	_SDVGFLPPFPTLDPEEK_	P43652	-0.106573	0.106573	0.107465	0.0514755	164	P43652	AFM	Afamin	AFAM_HUMAN	1	-7.12082	0.928792	Dengue	QC	NaN	NaN	NaN	33.1692	0.263166
Dengue / QC	_LVDEDMNSFK_	Q06033;Q06033-2	-0.445398	0.445398	3.92765e-07	8.16373e-07	168	Q06033;Q06033-2	ITIH3	Inter-alpha-trypsin inhibitor heavy chain H3;Isoform 2 of Inter-alpha-trypsin inhibitor heavy chain H3	ITIH3_HUMAN	1	-26.5618	0.734382	Dengue	QC	NaN	NaN	NaN	64.0739	0.0769704
Dengue / QC	_LVRPEVDVM[Oxidation (M)]C[Carbamidomethyl (C)]TAFHDNEETFLK_	P02768	-0.420825	0.420825	8.9792e-07	1.72873e-06	150	P02768	ALB	Serum albumin	ALBU_HUMAN	1	-25.3003	0.746997	Dengue	QC	NaN	NaN	NaN	52.5549	0.0780575
Dengue / QC	_KPIWLSQMSC[Carbamidomethyl (C)]SGR_	O43866	-0.428674	0.428674	8.52588e-09	2.52599e-08	174	O43866	CD5L	CD5 antigen-like	CD5L_HUMAN	1	-25.7056	0.742944	Dengue	QC	NaN	NaN	NaN	94.8809	0.068681
Dengue / QC	_DRDGNTLTYYR_	P02748	-0.422031	0.422031	1.25802e-07	2.907e-07	174	P02748	C9	Complement component C9	CO9_HUMAN	1	-25.3627	0.746373	Dengue	QC	NaN	NaN	NaN	76.0956	0.0743056
Dengue / QC	_LYHSEAFTVNFGDTEEAKK_	P01009	-0.406135	0.406135	1.62574e-05	2.35869e-05	160	P01009	SERPINA1	Alpha-1-antitrypsin	A1AT_HUMAN	1	-24.5358	0.754642	Dengue	QC	NaN	NaN	NaN	63.7601	0.0928441
Dengue / QC	_TYC[Carbamidomethyl (C)]SEPEK_	P00450	-0.181792	0.181792	0.268055	0.109283	22	P00450	CP	Ceruloplasmin	CERU_HUMAN	1	-11.8392	0.881608	Dengue	QC	NaN	NaN	NaN	1.95043	0.282565
Dengue / QC	_DSVSLRK_	Q9NZP8	-0.35174	0.35174	0.120792	0.0567471	52	Q9NZP8	C1RL	Complement C1r subcomponent-like protein	C1RL_HUMAN	1	-21.6362	0.783638	Dengue	QC	NaN	NaN	NaN	18.0699	0.266007
Dengue / QC	_SKWYNDYAVSVK_	A0A0B4J1U7	-0.449406	0.449406	0.0047985	0.00359342	146	A0A0B4J1U7	IGHV6-1	Immunoglobulin heavy variable 6-1	HV601_HUMAN	1	-26.7656	0.732344	Dengue	QC	NaN	NaN	NaN	105.327	0.149923
Dengue / QC	_TSNFNAAISLK_	P02748	-0.437011	0.437011	3.92471e-07	8.16058e-07	176	P02748	C9	Complement component C9	CO9_HUMAN	1	-26.1337	0.738663	Dengue	QC	NaN	NaN	NaN	85.687	0.0785906
Dengue / QC	_FSGSILGNK_	A0A075B6I0	-0.39479	0.39479	0.000866902	0.000800324	154	A0A075B6I0	IGLV8-61	Immunoglobulin lambda variable 8-61	LV861_HUMAN	1	-23.94	0.7606	Dengue	QC	NaN	NaN	NaN	41.9524	0.120412
Dengue / QC	_STSGGTAALGC[Carbamidomethyl (C)]LVK_	P01857	-0.408861	0.408861	0.0222319	0.0135729	176	P01857	IGHG1	Immunoglobulin heavy constant gamma 1	IGHG1_HUMAN	1	-24.6782	0.753218	Dengue	QC	NaN	NaN	NaN	48.7007	0.182806
Dengue / QC	_AKLGNFPWQAFTSIHGR_	Q9NZP8	-0.467377	0.467377	0.000137476	0.000157607	164	Q9NZP8	C1RL	Complement C1r subcomponent-like protein	C1RL_HUMAN	1	-27.6722	0.723278	Dengue	QC	NaN	NaN	NaN	41.7753	0.102804
Dengue / QC	_GYTQQLAFR_	P01024	-0.434602	0.434602	4.14049e-08	1.06702e-07	176	P01024	C3	Complement C3	CO3_HUMAN	1	-26.0102	0.739898	Dengue	QC	NaN	NaN	NaN	104.406	0.0727555
Dengue / QC	_SSQSLVHSDGNTYLSWLQQRPGQPPR_	A0A0C4DH68	-0.258551	0.258551	0.000777129	0.000726041	160	A0A0C4DH68	IGKV2-24	Immunoglobulin kappa variable 2-24	KV224_HUMAN	1	-16.4073	0.835927	Dengue	QC	NaN	NaN	NaN	71.1586	0.12249
Dengue / QC	_KC[Carbamidomethyl (C)]C[Carbamidomethyl (C)]EDGMR_	P01024	-0.494782	0.494782	0.293142	0.117496	44	P01024	C3	Complement C3	CO3_HUMAN	1	-29.0331	0.709669	Dengue	QC	NaN	NaN	NaN	9.86215	0.386965
Dengue / QC	_VPM[Oxidation (M)]MNSK_	P05155;P05155-3	-0.541519	0.541519	0.273579	0.111244	72	P05155;P05155-3	SERPING1	Plasma protease C1 inhibitor;Isoform 3 of Plasma protease C1 inhibitor	IC1_HUMAN	1	-31.2953	0.687047	Dengue	QC	NaN	NaN	NaN	16.6567	0.379023
Dengue / QC	_EFQLFSSPHGK_	P02787	-0.404663	0.404663	2.98712e-09	9.78187e-09	176	P02787	TF	Serotransferrin	TRFE_HUMAN	1	-24.4587	0.755413	Dengue	QC	NaN	NaN	NaN	99.7028	0.0657063
Dengue / QC	_GVPIPNKVIFIR_	P01023	-0.503383	0.503383	2.10451e-07	4.64359e-07	176	P01023	A2M	Alpha-2-macroglobulin	A2MG_HUMAN	1	-29.4549	0.705451	Dengue	QC	NaN	NaN	NaN	119.588	0.0774765
Dengue / QC	_NPANPVQR_	P00738	-0.420723	0.420723	0.0129924	0.00851888	172	P00738	HP	Haptoglobin	HPT_HUMAN	1	-25.295	0.74705	Dengue	QC	NaN	NaN	NaN	52.8623	0.165754
Dengue / QC	_YDVENC[Carbamidomethyl (C)]LANK_	P01023	-0.434515	0.434515	2.58415e-07	5.60757e-07	172	P01023	A2M	Alpha-2-macroglobulin	A2MG_HUMAN	1	-26.0057	0.739943	Dengue	QC	NaN	NaN	NaN	123.101	0.0781124
Dengue / QC	_EVQPVELPNC[Carbamidomethyl (C)]NLVK_	P27169	-0.389648	0.389648	0.00589252	0.00430541	176	P27169	PON1	Serum paraoxonase/arylesterase 1	PON1_HUMAN	1	-23.6684	0.763316	Dengue	QC	NaN	NaN	NaN	42.7393	0.146597
Dengue / QC	_STDYGIFQINSR_	P61626	-0.443368	0.443368	4.48154e-05	5.81482e-05	166	P61626	LYZ	Lysozyme C	LYSC_HUMAN	1	-26.4584	0.735416	Dengue	QC	NaN	NaN	NaN	98.8407	0.0990581
Dengue / QC	_QTISRPK_	P01871	-0.300432	0.300432	0.50751	0.181658	82	P01871	IGHM	Immunoglobulin heavy constant mu	IGHM_HUMAN	1	-18.7991	0.812009	Dengue	QC	NaN	NaN	NaN	26.424	0.629198
Dengue / QC	_ALYLQYTDETFR_	P00450	-0.471206	0.471206	0.000324104	0.000335019	176	P00450	CP	Ceruloplasmin	CERU_HUMAN	1	-27.8639	0.721361	Dengue	QC	NaN	NaN	NaN	58.2337	0.110548
Dengue / QC	_FSGSGAGTDFTLK_	A0A0C4DH68	-0.497811	0.497811	5.33483e-06	8.63207e-06	174	A0A0C4DH68	IGKV2-24	Immunoglobulin kappa variable 2-24	KV224_HUMAN	1	-29.1819	0.708181	Dengue	QC	NaN	NaN	NaN	79.6668	0.0863815
Dengue / QC	_ADDKETC[Carbamidomethyl (C)]FAEEGKK_	P02768	-0.269629	0.269629	0.0149231	0.00959398	176	P02768	ALB	Serum albumin	ALBU_HUMAN	1	-17.0467	0.829533	Dengue	QC	NaN	NaN	NaN	30.3742	0.163096
Dengue / QC	_SLHTLFGDK_	P02768	-0.421007	0.421007	1.3319e-07	3.06544e-07	176	P02768	ALB	Serum albumin	ALBU_HUMAN	1	-25.3097	0.746903	Dengue	QC	NaN	NaN	NaN	88.463	0.0732135
Dengue / QC	_FNWYVDGVEVHNAK_	P01857	-0.397693	0.397693	0.00777639	0.00545463	176	P01857	IGHG1	Immunoglobulin heavy constant gamma 1	IGHG1_HUMAN	1	-24.0929	0.759071	Dengue	QC	NaN	NaN	NaN	45.0597	0.150714
Dengue / QC	_SYTSHTNEIHKGK_	P10643	-0.0232916	0.0232916	0.539376	0.190512	10	P10643	C7	Complement component C7	CO7_HUMAN	1	-1.60149	0.983985	Dengue	QC	NaN	NaN	NaN	4.107	0.627
Dengue / QC	_AGVETTTPSK_	P0DOY2	-0.278025	0.278025	0.0191672	0.0119317	176	P0DOY2	IGLC2	Immunoglobulin lambda constant 2	IGLC2_HUMAN	1	-17.5281	0.824719	Dengue	QC	NaN	NaN	NaN	39.9492	0.171727
Dengue / QC	_RKEYEMK_	P01023	-0.351418	0.351418	0.310558	0.123097	40	P01023	A2M	Alpha-2-macroglobulin	A2MG_HUMAN	1	-21.6187	0.783813	Dengue	QC	NaN	NaN	NaN	9.79941	0.39149
Dengue / QC	_SDDKVTLEER_	P01024	-0.396298	0.396298	0.000403916	0.000406523	174	P01024	C3	Complement C3	CO3_HUMAN	1	-24.0195	0.759805	Dengue	QC	NaN	NaN	NaN	49.4694	0.110256
Dengue / QC	_QAPGQELGWMGR_	A0A075B7D0	-0.441814	0.441814	1.23556e-06	2.30345e-06	176	A0A075B7D0	IGHV1OR15-1	Immunoglobulin heavy variable 1/OR15-1 (non-functional) (Fragment)	A0A075B7D0_HUMAN	1	-26.3792	0.736208	Dengue	QC	NaN	NaN	NaN	120.916	0.0816213
Dengue / QC	_DSAHGFLK_	P02787	-0.627114	0.627114	0.000772785	0.000722452	172	P02787	TF	Serotransferrin	TRFE_HUMAN	1	-35.253	0.64747	Dengue	QC	NaN	NaN	NaN	61.1304	0.117748
Dengue / QC	_VGFYESDVMGR_	P01023	-0.382749	0.382749	1.29309e-05	1.91557e-05	176	P01023	A2M	Alpha-2-macroglobulin	A2MG_HUMAN	1	-23.3025	0.766975	Dengue	QC	NaN	NaN	NaN	60.8248	0.0877658
Dengue / QC	_KADGSYAAWLSR_	P0C0L5	-0.416733	0.416733	2.09879e-06	3.71701e-06	174	P0C0L5	C4B	Complement C4-B	CO4B_HUMAN	1	-25.0881	0.749119	Dengue	QC	NaN	NaN	NaN	106.642	0.0828678
Dengue / QC	_SGLSTGWTQLSK_	P04217	-0.427811	0.427811	7.22897e-07	1.4202e-06	176	P04217	A1BG	Alpha-1B-glycoprotein	A1BG_HUMAN	1	-25.6611	0.743389	Dengue	QC	NaN	NaN	NaN	51.4074	0.0736513
Dengue / QC	_TGTHGLLVKQEDMK_	P01023	-0.332738	0.332738	0.0010771	0.000968953	176	P01023	A2M	Alpha-2-macroglobulin	A2MG_HUMAN	1	-20.5972	0.794028	Dengue	QC	NaN	NaN	NaN	57.0465	0.120504
Dengue / QC	_DGNTLTYYR_	P02748	-0.450113	0.450113	0.000131281	0.000151437	166	P02748	C9	Complement component C9	CO9_HUMAN	1	-26.8015	0.731985	Dengue	QC	NaN	NaN	NaN	49.7807	0.0998392
Dengue / QC	_SGQSEDRQPVPGQQMTLK_	P01024	-0.358642	0.358642	0.000121729	0.000141723	176	P01024	C3	Complement C3	CO3_HUMAN	1	-22.0102	0.779898	Dengue	QC	NaN	NaN	NaN	43.7546	0.097786
Dengue / QC	_NNALDFVTK_	P04114	-0.452651	0.452651	3.07626e-05	4.17255e-05	72	P04114	APOB	Apolipoprotein B-100	APOB_HUMAN	1	-26.9301	0.730699	Dengue	QC	NaN	NaN	NaN	47.79	0.0895616
Dengue / QC	_TGLKEFLK_	P04114	0.600709	0.600709	0.68575	0.230299	24	P04114	APOB	Apolipoprotein B-100	APOB_HUMAN	1	51.6462	1.51646	Dengue	QC	NaN	NaN	NaN	2.12404	0.883623
Dengue / QC	_EIGELYLPK_	P01011	-0.446354	0.446354	3.75837e-07	7.84864e-07	176	P01011	SERPINA3	Alpha-1-antichymotrypsin	AACT_HUMAN	1	-26.6105	0.733895	Dengue	QC	NaN	NaN	NaN	122.363	0.0762849
Dengue / QC	_EC[Carbamidomethyl (C)]C[Carbamidomethyl (C)]EKPLLEK_	P02768	-0.332215	0.332215	0.0151355	0.00971218	176	P02768	ALB	Serum albumin	ALBU_HUMAN	1	-20.5684	0.794316	Dengue	QC	NaN	NaN	NaN	43.9471	0.16205
Dengue / QC	_TMLLQPAGSLGSYSYR_	P41222	-0.213269	0.213269	0.0430124	0.0239073	130	P41222	PTGDS	Prostaglandin-H2 D-isomerase	PTGDS_HUMAN	1	-13.742	0.86258	Dengue	QC	NaN	NaN	NaN	79.6371	0.198965
Dengue / QC	_SYYWIGIRK_	P14151;P14151-2	-0.29727	0.29727	0.0268422	0.0158997	76	P14151;P14151-2	SELL	L-selectin;Isoform 2 of L-selectin	LYAM1_HUMAN	1	-18.6209	0.813791	Dengue	QC	NaN	NaN	NaN	20.3805	0.171249
Dengue / QC	_SGTSASLAISGLR_	P01700	-0.412979	0.412979	0.00194538	0.00163584	176	P01700	IGLV1-47	Immunoglobulin lambda variable 1-47	LV147_HUMAN	1	-24.8929	0.751071	Dengue	QC	NaN	NaN	NaN	43.6803	0.123766
Dengue / QC	_EALKLEEK_	P01024	-0.398218	0.398218	0.0240468	0.0145045	174	P01024	C3	Complement C3	CO3_HUMAN	1	-24.1205	0.758795	Dengue	QC	NaN	NaN	NaN	38.6245	0.173609
Dengue / QC	_SGQSEDRQPVPGQQM[Oxidation (M)]TLK_	P01024	-0.412656	0.412656	0.0126562	0.00832874	176	P01024	C3	Complement C3	CO3_HUMAN	1	-24.8761	0.751239	Dengue	QC	NaN	NaN	NaN	42.7071	0.156272
Dengue / QC	_KLISVDTEHSNIYLQNGPDR_	P00450	-0.361932	0.361932	3.24906e-05	4.38283e-05	176	P00450	CP	Ceruloplasmin	CERU_HUMAN	1	-22.1878	0.778122	Dengue	QC	NaN	NaN	NaN	47.895	0.0885608
Dengue / QC	_KQINDYVEK_	P01009	-0.318226	0.318226	0.0034244	0.00267553	128	P01009	SERPINA1	Alpha-1-antitrypsin	A1AT_HUMAN	1	-19.7944	0.802056	Dengue	QC	NaN	NaN	NaN	57.7944	0.133055
Dengue / QC	_IAIDLFK_	P05546	-0.330396	0.330396	0.0111452	0.00746255	176	P05546	SERPIND1	Heparin cofactor 2	HEP2_HUMAN	1	-20.4682	0.795318	Dengue	QC	NaN	NaN	NaN	35.705	0.151667
Dengue / QC	_VVSVLTVVHQDWLNGK_	P01859	-0.399467	0.399467	0.00116747	0.00104164	176	P01859	IGHG2	Immunoglobulin heavy constant gamma 2	IGHG2_HUMAN	1	-24.1862	0.758138	Dengue	QC	NaN	NaN	NaN	64.2296	0.119397
Dengue / QC	_ITC[Carbamidomethyl (C)]GGNNIGSK_	A0A075B6K5	-0.315548	0.315548	0.179374	0.0784498	154	A0A075B6K5	IGLV3-9	Immunoglobulin lambda variable 3-9	LV39_HUMAN	1	-19.6454	0.803546	Dengue	QC	NaN	NaN	NaN	26.6367	0.294126
Dengue / QC	_VTMSVDTSK_	A0A0C4DH34	-0.350591	0.350591	0.000144804	0.00016509	170	A0A0C4DH34	IGHV4-28	Immunoglobulin heavy variable 4-28	HV428_HUMAN	1	-21.5737	0.784263	Dengue	QC	NaN	NaN	NaN	66.1596	0.100537
Dengue / QC	_YVGGQEHFAHLLILR_	P02763	-0.397535	0.397535	9.53133e-09	2.79877e-08	176	P02763	ORM1	Alpha-1-acid glycoprotein 1	A1AG1_HUMAN	1	-24.0846	0.759154	Dengue	QC	NaN	NaN	NaN	118.134	0.0655711
Dengue / QC	_AEDTAVYYC[Carbamidomethyl (C)]AK_	A0A0J9YY99	-0.365322	0.365322	8.75068e-05	0.000105608	176	A0A0J9YY99	NaN	Uncharacterized protein (Fragment)	A0A0J9YY99_HUMAN	1	-22.3705	0.776295	Dengue	QC	NaN	NaN	NaN	61.1843	0.0963105
Dengue / QC	_FSGSLLGGK_	P04211	-0.417238	0.417238	2.42711e-05	3.3705e-05	174	P04211	IGLV7-43	Immunoglobulin lambda variable 7-43	LV743_HUMAN	1	-25.1143	0.748857	Dengue	QC	NaN	NaN	NaN	67.4921	0.0892037
Dengue / QC	_LPPNVVEESAR_	P01023	-0.396459	0.396459	2.03606e-05	2.88013e-05	176	P01023	A2M	Alpha-2-macroglobulin	A2MG_HUMAN	1	-24.0279	0.759721	Dengue	QC	NaN	NaN	NaN	75.2345	0.0886867
Dengue / QC	_LLIYAASSLQSGVPSR_	A0A0C4DH72	-0.578478	0.578478	0.000646665	0.000617145	176	A0A0C4DH72	IGKV1-6	Immunoglobulin kappa variable 1-6	KV106_HUMAN	1	-33.033	0.66967	Dengue	QC	NaN	NaN	NaN	91.7577	0.114062
Dengue / QC	_LLELTGPK_	P04217	-0.404061	0.404061	4.3165e-06	7.12624e-06	176	P04217	A1BG	Alpha-1B-glycoprotein	A1BG_HUMAN	1	-24.4272	0.755728	Dengue	QC	NaN	NaN	NaN	50.8758	0.0782277
Dengue / QC	_AFKAWAVARLSQR_	P02768	-0.475331	0.475331	0.00414624	0.00316312	114	P02768	ALB	Serum albumin	ALBU_HUMAN	1	-28.0698	0.719302	Dengue	QC	NaN	NaN	NaN	40.3794	0.132379
Dengue / QC	_VDNALQSGNSQESVTEQDSKDSTYSLSSTLTLSK_	P01834	-0.53738	0.53738	0.0722635	0.0368893	176	P01834	IGKC	Immunoglobulin kappa constant	IGKC_HUMAN	1	-31.0979	0.689021	Dengue	QC	NaN	NaN	NaN	41.4436	0.217975
Dengue / QC	_QGIPFFGQVR_	P01023	-0.501403	0.501403	0.00181121	0.00153523	176	P01023	A2M	Alpha-2-macroglobulin	A2MG_HUMAN	1	-29.3581	0.706419	Dengue	QC	NaN	NaN	NaN	56.1237	0.122668
Dengue / QC	_VDKDNEDFQESNR_	P00450	0.187469	0.187469	0.213742	0.0905901	130	P00450	CP	Ceruloplasmin	CERU_HUMAN	1	13.8764	1.13876	Dengue	QC	NaN	NaN	NaN	17.3362	0.310448
Dengue / QC	_GHFSISIPVK_	P01023	-0.416487	0.416487	6.74928e-06	1.06753e-05	176	P01023	A2M	Alpha-2-macroglobulin	A2MG_HUMAN	1	-25.0753	0.749247	Dengue	QC	NaN	NaN	NaN	116.413	0.084911
Dengue / QC	_DTVIKPLLVEPEGLEK_	P01023	-0.446588	0.446588	2.52771e-05	3.50262e-05	176	P01023	A2M	Alpha-2-macroglobulin	A2MG_HUMAN	1	-26.6224	0.733776	Dengue	QC	NaN	NaN	NaN	73.3171	0.0888313
Dengue / QC	_MNFRPGVLSSR_	Q14624	-0.311197	0.311197	0.00770071	0.00540746	174	Q14624	ITIH4	Inter-alpha-trypsin inhibitor heavy chain H4	ITIH4_HUMAN	1	-19.4027	0.805973	Dengue	QC	NaN	NaN	NaN	55.503	0.14432
Dengue / QC	_EKNVPLPVIAELPPK_	P01871	-0.455449	0.455449	0.000803038	0.000747102	150	P01871	IGHM	Immunoglobulin heavy constant mu	IGHM_HUMAN	1	-27.0717	0.729283	Dengue	QC	NaN	NaN	NaN	74.3057	0.114143
Dengue / QC	_EQLSLLDRFTEDAK_	P01011	-0.507484	0.507484	0.0250909	0.0150366	110	P01011	SERPINA3	Alpha-1-antichymotrypsin	AACT_HUMAN	1	-29.6552	0.703448	Dengue	QC	NaN	NaN	NaN	33.3667	0.169823
Dengue / QC	_KEDSC[Carbamidomethyl (C)]QLGYSAGPC[Carbamidomethyl (C)]MGMTSR_	P02760	-0.352687	0.352687	0.000118489	0.000138425	176	P02760	AMBP	Protein AMBP	AMBP_HUMAN	1	-21.6876	0.783124	Dengue	QC	NaN	NaN	NaN	45.0435	0.0944564
Dengue / QC	_DSERPSGIPER_	P01718	-0.482723	0.482723	0.00473179	0.00354992	168	P01718	IGLV3-27	Immunoglobulin lambda variable 3-27	LV327_HUMAN	1	-28.4374	0.715626	Dengue	QC	NaN	NaN	NaN	107.177	0.137888
Dengue / QC	_LYHSEAFTVNFGDTEEAKKQINDYVEK_	P01009	0.107479	0.107479	0.515508	0.183939	30	P01009	SERPINA1	Alpha-1-antitrypsin	A1AT_HUMAN	1	7.73442	1.07734	Dengue	QC	NaN	NaN	NaN	2.46427	0.526062
Dengue / QC	_LGEHNIEVLEGNEQFINAAK_	A0A0J9YYC8;A6XMV8;A6XMV9;P07478	-0.482814	0.482814	0.102039	0.0493475	176	A0A0J9YYC8;A6XMV8;A6XMV9;P07478	PRSS2	Trypsin-2;Protease serine 2 preproprotein;Protease serine 2 preproprotein;Trypsin-2	A0A0J9YYC8_HUMAN;A6XMV8_HUMAN;A6XMV9_HUMAN;TRY2_HUMAN	1	-28.4419	0.715581	Dengue	QC	NaN	NaN	NaN	41.3398	0.237533
Dengue / QC	_MHAINGR_	P00450	-0.286764	0.286764	0.249192	0.10271	92	P00450	CP	Ceruloplasmin	CERU_HUMAN	1	-18.0261	0.819739	Dengue	QC	NaN	NaN	NaN	28.1393	0.336921
Dengue / QC	_DLLFRDDTVC[Carbamidomethyl (C)]LAK_	P02787	-0.448519	0.448519	0.000141872	0.000162099	176	P02787	TF	Serotransferrin	TRFE_HUMAN	1	-26.7205	0.732795	Dengue	QC	NaN	NaN	NaN	49.0587	0.0958397
Dengue / QC	_DLKPAIVK_	P01023	-0.396456	0.396456	0.000335436	0.000345188	176	P01023	A2M	Alpha-2-macroglobulin	A2MG_HUMAN	1	-24.0278	0.759722	Dengue	QC	NaN	NaN	NaN	71.4044	0.104844
Dengue / QC	_DDSKNSLYLQMNSLK_	A0A0B4J1Y9	-0.949484	0.949484	0.0809018	0.0406057	68	A0A0B4J1Y9	IGHV3-72	Immunoglobulin heavy variable 3-72	HV372_HUMAN	1	-48.2182	0.517818	Dengue	QC	NaN	NaN	NaN	45.7106	0.220874
Dengue / QC	_GSFEFPVGDAVSK_	P0C0L5	-0.379223	0.379223	0.0020931	0.00174389	176	P0C0L5	C4B	Complement C4-B	CO4B_HUMAN	1	-23.1148	0.768852	Dengue	QC	NaN	NaN	NaN	47.587	0.121075
Dengue / QC	_TAGWNIPM[Oxidation (M)]GLLYNKINHC[Carbamidomethyl (C)]R_	P02787	0.652263	0.652263	0.723638	0.239772	34	P02787	TF	Serotransferrin	TRFE_HUMAN	1	57.1632	1.57163	Dengue	QC	NaN	NaN	NaN	1.25701	0.892531
Dengue / QC	_GLEWVGR_	A0A0B4J1Y9	-0.371818	0.371818	5.64281e-07	1.13486e-06	176	A0A0B4J1Y9	IGHV3-72	Immunoglobulin heavy variable 3-72	HV372_HUMAN	1	-22.7192	0.772808	Dengue	QC	NaN	NaN	NaN	75.3002	0.0716631
Dengue / QC	_FTPTETNKAEQC[Carbamidomethyl (C)]C[Carbamidomethyl (C)]EETASSISLHGK_	P02748	-0.376821	0.376821	0.000182931	0.000202012	172	P02748	C9	Complement component C9	CO9_HUMAN	1	-22.9867	0.770133	Dengue	QC	NaN	NaN	NaN	53.3795	0.0972801
Dengue / QC	_GDSGGPLIVHKR_	B4E1Z4	-0.397906	0.397906	0.00194128	0.0016333	166	B4E1Z4	NaN	cDNA FLJ55673, highly similar to Complement factor B (EC 3.4.21.47)	B4E1Z4_HUMAN	1	-24.1041	0.758959	Dengue	QC	NaN	NaN	NaN	62.5978	0.120883
Dengue / QC	_EPQVYTLPPSREEMTK_	P01860	-0.338707	0.338707	0.00120625	0.0010716	176	P01860	IGHG3	Immunoglobulin heavy constant gamma 3	IGHG3_HUMAN	1	-20.925	0.79075	Dengue	QC	NaN	NaN	NaN	52.759	0.114266
Dengue / QC	_YISKYELDK_	P01024	-0.326325	0.326325	1.29756e-06	2.40683e-06	166	P01024	C3	Complement C3	CO3_HUMAN	1	-20.2434	0.797566	Dengue	QC	NaN	NaN	NaN	110.521	0.0763504
Dengue / QC	_QQNAQGGFSSTQDTVVALHALSK_	P01023	-0.411262	0.411262	1.23144e-06	2.29726e-06	176	P01023	A2M	Alpha-2-macroglobulin	A2MG_HUMAN	1	-24.8034	0.751966	Dengue	QC	NaN	NaN	NaN	91.7601	0.0749896
Dengue / QC	_SSNNPHSPIVEEFQVPYNKLQVIFK_	P09871	1.10715	1.10715	0.648325	0.220677	128	P09871	C1S	Complement C1s subcomponent	C1S_HUMAN	1	115.42	2.1542	Dengue	QC	NaN	NaN	NaN	14.3588	0.836194
Dengue / QC	_LLRDADDLQKR_	P02649	-0.268553	0.268553	0.101808	0.0492687	70	P02649	APOE	Apolipoprotein E	APOE_HUMAN	1	-16.9848	0.830152	Dengue	QC	NaN	NaN	NaN	30.3165	0.230813
Dengue / QC	_NALALFVLPK_	P05543	-0.321515	0.321515	0.00508531	0.00377732	174	P05543	SERPINA7	Thyroxine-binding globulin	THBG_HUMAN	1	-19.9771	0.800229	Dengue	QC	NaN	NaN	NaN	35.011	0.130256
Dengue / QC	_LNSDGSHSKGDGIPDRFSGSSSGAER_	A0A075B6H9	-0.106922	0.106922	0.126508	0.058872	104	A0A075B6H9	IGLV4-69	Immunoglobulin lambda variable 4-69	LV469_HUMAN	1	-7.14331	0.928567	Dengue	QC	NaN	NaN	NaN	75.7035	0.252006
Dengue / QC	_PKDTLMISR_	P01857	-0.573886	0.573886	0.144705	0.0658163	136	P01857	IGHG1	Immunoglobulin heavy constant gamma 1	IGHG1_HUMAN	1	-32.8195	0.671805	Dengue	QC	NaN	NaN	NaN	29.4669	0.259391
Dengue / QC	_DTM[Oxidation (M)]VEDLVVLVR_	P07358	0.452787	0.452787	0.629275	0.215613	44	P07358	C8B	Complement component C8 beta chain	CO8B_HUMAN	1	36.8681	1.36868	Dengue	QC	NaN	NaN	NaN	3.4065	0.733184
Dengue / QC	_LVLSSEK_	P01024	-0.340084	0.340084	0.00015962	0.000178975	176	P01024	C3	Complement C3	CO3_HUMAN	1	-21.0005	0.789995	Dengue	QC	NaN	NaN	NaN	48.3824	0.0946482
Dengue / QC	_NTLYLQMSSLR_	A0A0J9YX35	-0.400715	0.400715	0.000361103	0.000368381	170	A0A0J9YX35	IGHV3-64D	Immunoglobulin heavy variable 3-64D	HV64D_HUMAN	1	-24.2517	0.757483	Dengue	QC	NaN	NaN	NaN	75.2752	0.103722
Dengue / QC	_VAAGAFQGLR_	P02750	-0.363129	0.363129	4.86351e-06	7.94295e-06	172	P02750	LRG1	Leucine-rich alpha-2-glycoprotein	A2GL_HUMAN	1	-22.2523	0.777477	Dengue	QC	NaN	NaN	NaN	111.967	0.0806004
Dengue / QC	_EYTDASFTNRK_	P00450	-0.350761	0.350761	0.000123313	0.000143335	176	P00450	CP	Ceruloplasmin	CERU_HUMAN	1	-21.5829	0.784171	Dengue	QC	NaN	NaN	NaN	55.6587	0.0937653
Dengue / QC	_ALGHLDLSGNR_	P02750	-0.320073	0.320073	0.00138396	0.00121065	150	P02750	LRG1	Leucine-rich alpha-2-glycoprotein	A2GL_HUMAN	1	-19.897	0.80103	Dengue	QC	NaN	NaN	NaN	63.7673	0.115541
Dengue / QC	_SLPEGVANGIEVYSTK_	Q06033;Q06033-2	-0.439528	0.439528	0.0030245	0.00240311	174	Q06033;Q06033-2	ITIH3	Inter-alpha-trypsin inhibitor heavy chain H3;Isoform 2 of Inter-alpha-trypsin inhibitor heavy chain H3	ITIH3_HUMAN	1	-26.2624	0.737376	Dengue	QC	NaN	NaN	NaN	47.5248	0.12363
Dengue / QC	_ENAKNSLYLQMNSLR_	P01766	-0.443732	0.443732	0.000473006	0.000466458	174	P01766	IGHV3-13	Immunoglobulin heavy variable 3-13	HV313_HUMAN	1	-26.477	0.73523	Dengue	QC	NaN	NaN	NaN	60.4249	0.104343
Dengue / QC	_VITEPIPVSDLR_	A0A087WTK0;A0A087WVC6;Q12913	-0.318891	0.318891	0.0464033	0.0254609	16	A0A087WTK0;A0A087WVC6;Q12913	PTPRJ	Receptor-type tyrosine-protein phosphatase eta	A0A087WTK0_HUMAN;A0A087WVC6_HUMAN;PTPRJ_HUMAN	1	-19.8314	0.801686	Dengue	QC	NaN	NaN	NaN	3.38279	0.124817
Dengue / QC	_DYFIATC[Carbamidomethyl (C)]K_	B4DPQ0	-0.290763	0.290763	0.0010365	0.000936815	176	B4DPQ0	C1R	Complement C1r subcomponent	B4DPQ0_HUMAN	1	-18.2531	0.817469	Dengue	QC	NaN	NaN	NaN	35.4122	0.107305
Dengue / QC	_GEAFTLK_	P01023	-0.386881	0.386881	0.00144692	0.0012598	166	P01023	A2M	Alpha-2-macroglobulin	A2MG_HUMAN	1	-23.5219	0.764781	Dengue	QC	NaN	NaN	NaN	70.5083	0.115583
Dengue / QC	_TWYPEVPK_	P04003	-0.36974	0.36974	0.00226577	0.00186951	174	P04003	C4BPA	C4b-binding protein alpha chain	C4BPA_HUMAN	1	-22.6078	0.773922	Dengue	QC	NaN	NaN	NaN	42.2901	0.117723
Dengue / QC	_LNSDGSHSKGDGIPDR_	A0A075B6H9	0.0631831	0.0631831	0.0129172	0.00847245	52	A0A075B6H9	IGLV4-69	Immunoglobulin lambda variable 4-69	LV469_HUMAN	1	4.47683	1.04477	Dengue	QC	NaN	NaN	NaN	27.4082	0.143799
Dengue / QC	_LVTDLTK_	P02768	-0.360245	0.360245	1.86949e-05	2.66493e-05	176	P02768	ALB	Serum albumin	ALBU_HUMAN	1	-22.0968	0.779032	Dengue	QC	NaN	NaN	NaN	44.1615	0.0795862
Dengue / QC	_SDIAPVAR_	P01023	-0.376152	0.376152	3.37105e-05	4.53085e-05	174	P01023	A2M	Alpha-2-macroglobulin	A2MG_HUMAN	1	-22.951	0.77049	Dengue	QC	NaN	NaN	NaN	111.807	0.0882361
Dengue / QC	_KLINDYVK_	P01011	-0.389625	0.389625	0.0074205	0.00524324	124	P01011	SERPINA3	Alpha-1-antichymotrypsin	AACT_HUMAN	1	-23.6672	0.763328	Dengue	QC	NaN	NaN	NaN	58.4892	0.136836
Dengue / QC	_VTSIQDWVQK_	P00738	-0.354111	0.354111	0.0772099	0.0390311	176	P00738	HP	Haptoglobin	HPT_HUMAN	1	-21.7649	0.782351	Dengue	QC	NaN	NaN	NaN	52.0197	0.210393
Dengue / QC	_SDVMYTDWK_	P19652	-0.395149	0.395149	2.10271e-08	5.70949e-08	176	P19652	ORM2	Alpha-1-acid glycoprotein 2	A1AG2_HUMAN	1	-23.9589	0.760411	Dengue	QC	NaN	NaN	NaN	88.3265	0.0615586
Dengue / QC	_HSTIFENLANKADR_	P02787	-0.349709	0.349709	0.00041411	0.000415767	176	P02787	TF	Serotransferrin	TRFE_HUMAN	1	-21.5258	0.784742	Dengue	QC	NaN	NaN	NaN	51.5003	0.100292
Dengue / QC	_SRVTMSVDTSK_	A0A0C4DH34	-0.490811	0.490811	0.230552	0.0963718	72	A0A0C4DH34	IGHV4-28	Immunoglobulin heavy variable 4-28	HV428_HUMAN	1	-28.8375	0.711625	Dengue	QC	NaN	NaN	NaN	30.916	0.308546
Dengue / QC	_C[Carbamidomethyl (C)]LC[Carbamidomethyl (C)]AC[Carbamidomethyl (C)]PFK_	P02748	-0.328477	0.328477	0.0107279	0.00722033	96	P02748	C9	Complement component C9	CO9_HUMAN	1	-20.3623	0.796377	Dengue	QC	NaN	NaN	NaN	30.7387	0.138907
Dengue / QC	_GTHC[Carbamidomethyl (C)]NQVEVIATLKDGR_	P02775	-0.33435	0.33435	0.00299825	0.00238586	146	P02775	PPBP	Platelet basic protein	CXCL7_HUMAN	1	-20.6858	0.793142	Dengue	QC	NaN	NaN	NaN	53.82	0.121351
Dengue / QC	_TGTHGLLVKQEDM[Oxidation (M)]K_	P01023	0.0327288	0.0327288	0.297322	0.118904	148	P01023	A2M	Alpha-2-macroglobulin	A2MG_HUMAN	1	2.29452	1.02295	Dengue	QC	NaN	NaN	NaN	45.4592	0.357693
Dengue / QC	_YSPSFQGQVTISADK_	A0A0C4DH38	-0.452114	0.452114	0.0122812	0.00811338	160	A0A0C4DH38	IGHV5-51	Immunoglobulin heavy variable 5-51	HV551_HUMAN	1	-26.9029	0.730971	Dengue	QC	NaN	NaN	NaN	83.2635	0.14725
Dengue / QC	_ANTVQEATFQMELPK_	Q14624	-0.43173	0.43173	0.000111824	0.00013149	174	Q14624	ITIH4	Inter-alpha-trypsin inhibitor heavy chain H4	ITIH4_HUMAN	1	-25.8628	0.741372	Dengue	QC	NaN	NaN	NaN	47.1688	0.0893355
Dengue / QC	_AGDFLEANYM[Oxidation (M)]NLQR_	P01024	-0.394201	0.394201	0.00804857	0.00562571	164	P01024	C3	Complement C3	CO3_HUMAN	1	-23.9089	0.760911	Dengue	QC	NaN	NaN	NaN	51.8428	0.136273
Dengue / QC	_LLIYGASIR_	A0A087WSY6	-0.407527	0.407527	2.29176e-06	4.02418e-06	176	A0A087WSY6	IGKV3D-15	Immunoglobulin kappa variable 3D-15	KVD15_HUMAN	1	-24.6085	0.753915	Dengue	QC	NaN	NaN	NaN	84.6725	0.0739086
Dengue / QC	_M[Oxidation (M)]ESLGITSR_	P07357	-0.777742	0.777742	0.513971	0.183498	76	P07357	C8A	Complement component C8 alpha chain	CO8A_HUMAN	1	-41.6721	0.583279	Dengue	QC	NaN	NaN	NaN	6.41535	0.542226
Dengue / QC	_NLASRPYTFHSHGITYYK_	P00450	-0.0702876	0.0702876	0.0985592	0.0479904	94	P00450	CP	Ceruloplasmin	CERU_HUMAN	1	-4.75519	0.952448	Dengue	QC	NaN	NaN	NaN	25.4998	0.21794
Dengue / QC	_LVDKFLEDVKK_	P01009	-0.341927	0.341927	0.0128388	0.00843048	154	P01009	SERPINA1	Alpha-1-antitrypsin	A1AT_HUMAN	1	-21.1013	0.788987	Dengue	QC	NaN	NaN	NaN	49.9248	0.144771
Dengue / QC	_HQPQEFPTYVEPTNDEIC[Carbamidomethyl (C)]EAFR_	P02774;P02774-3	-0.382807	0.382807	0.0266028	0.015779	176	P02774;P02774-3	GC	Vitamin D-binding protein;Isoform 3 of Vitamin D-binding protein	VTDB_HUMAN	1	-23.3056	0.766944	Dengue	QC	NaN	NaN	NaN	43.9786	0.162328
Dengue / QC	_DGAGDVAFVK_	P02787	-0.351584	0.351584	2.50897e-06	4.36705e-06	176	P02787	TF	Serotransferrin	TRFE_HUMAN	1	-21.6277	0.783723	Dengue	QC	NaN	NaN	NaN	68.5761	0.072514
Dengue / QC	_SSGSLLNNAIK_	P01023	-0.429422	0.429422	6.84112e-06	1.07998e-05	176	P01023	A2M	Alpha-2-macroglobulin	A2MG_HUMAN	1	-25.7441	0.742559	Dengue	QC	NaN	NaN	NaN	88.9602	0.0778299
Dengue / QC	_TEDTAVYYC[Carbamidomethyl (C)]TR_	A0A0B4J1V6	-0.373929	0.373929	0.00257907	0.00208969	176	A0A0B4J1V6	IGHV3-73	Immunoglobulin heavy variable 3-73	HV373_HUMAN	1	-22.8322	0.771678	Dengue	QC	NaN	NaN	NaN	57.5623	0.118087
Dengue / QC	_WFYIASAFRNEEYNK_	P19652	0.893446	0.893446	0.593781	0.2057	48	P19652	ORM2	Alpha-1-acid glycoprotein 2	A1AG2_HUMAN	1	85.7608	1.85761	Dengue	QC	NaN	NaN	NaN	7.38941	0.667466
Dengue / QC	_GHFSISIPVKSDIAPVAR_	P01023	-0.446037	0.446037	0.00593683	0.00433584	176	P01023	A2M	Alpha-2-macroglobulin	A2MG_HUMAN	1	-26.5943	0.734057	Dengue	QC	NaN	NaN	NaN	41.5935	0.128014
Dengue / QC	_IAQWQSFQLEGGLK_	P01023	-0.368889	0.368889	0.00672462	0.00482661	176	P01023	A2M	Alpha-2-macroglobulin	A2MG_HUMAN	1	-22.5621	0.774379	Dengue	QC	NaN	NaN	NaN	63.8066	0.132484
Dengue / QC	_C[Carbamidomethyl (C)]C[Carbamidomethyl (C)]KADDKETC[Carbamidomethyl (C)]FAEEGK_	P02768	-0.380119	0.380119	0.0438363	0.0242787	176	P02768	ALB	Serum albumin	ALBU_HUMAN	1	-23.1626	0.768374	Dengue	QC	NaN	NaN	NaN	47.5153	0.17919
Dengue / QC	_ESGVPDR_	P06312	-0.289625	0.289625	0.00183281	0.00155154	170	P06312	IGKV4-1	Immunoglobulin kappa variable 4-1	KV401_HUMAN	1	-18.1885	0.818115	Dengue	QC	NaN	NaN	NaN	74.5145	0.114802
Dengue / QC	_AAVYHHFISDGVR_	P01024	-0.311226	0.311226	0.013969	0.00906245	176	P01024	C3	Complement C3	CO3_HUMAN	1	-19.4043	0.805957	Dengue	QC	NaN	NaN	NaN	37.9748	0.143959
Dengue / QC	_GQESSTDIKAPEGFAVR_	Q9NZP8	-0.391907	0.391907	0.0005913	0.000569773	142	Q9NZP8	C1RL	Complement C1r subcomponent-like protein	C1RL_HUMAN	1	-23.7878	0.762122	Dengue	QC	NaN	NaN	NaN	50.2585	0.101079
Dengue / QC	_ALYVHGGYK_	O75882;O75882-2;O75882-3	-0.0984596	0.0984596	0.144649	0.0657964	26	O75882;O75882-2;O75882-3	ATRN	Attractin;Isoform 2 of Attractin;Isoform 3 of Attractin	ATRN_HUMAN	1	-6.59703	0.93403	Dengue	QC	NaN	NaN	NaN	4.97245	0.214272
Dengue / QC	_LALDNGGLAR_	Q14624	-0.387333	0.387333	3.72128e-07	7.78246e-07	176	Q14624	ITIH4	Inter-alpha-trypsin inhibitor heavy chain H4	ITIH4_HUMAN	1	-23.5458	0.764542	Dengue	QC	NaN	NaN	NaN	66.0131	0.0654962
Dengue / QC	_SPLFMGK_	P01009	-0.359075	0.359075	1.55841e-07	3.53858e-07	176	P01009	SERPINA1	Alpha-1-antitrypsin	A1AT_HUMAN	1	-22.0336	0.779664	Dengue	QC	NaN	NaN	NaN	85.2601	0.064688
Dengue / QC	_EQLSLLDR_	P01011	-0.329174	0.329174	0.000478329	0.000470822	168	P01011	SERPINA3	Alpha-1-antichymotrypsin	AACT_HUMAN	1	-20.4008	0.795992	Dengue	QC	NaN	NaN	NaN	94.5824	0.102193
Dengue / QC	_HSIGYSIR_	P33151	-0.379209	0.379209	0.0526405	0.0282466	86	P33151	CDH5	Cadherin-5	CADH5_HUMAN	1	-23.1141	0.768859	Dengue	QC	NaN	NaN	NaN	21.141	0.179995
Dengue / QC	_ADLSGITGAR_	P01011	-0.317122	0.317122	2.514e-05	3.48696e-05	174	P01011	SERPINA3	Alpha-1-antichymotrypsin	AACT_HUMAN	1	-19.733	0.80267	Dengue	QC	NaN	NaN	NaN	68.3524	0.08174
Dengue / QC	_AAPSVTLFPPSSEELQANK_	P0DOY2	-0.414027	0.414027	0.000100129	0.000119098	174	P0DOY2	IGLC2	Immunoglobulin lambda constant 2	IGLC2_HUMAN	1	-24.9474	0.750526	Dengue	QC	NaN	NaN	NaN	92.1631	0.0907541
Dengue / QC	_YLYEIARR_	P02768	-0.343048	0.343048	2.48456e-05	3.44696e-05	176	P02768	ALB	Serum albumin	ALBU_HUMAN	1	-21.1626	0.788374	Dengue	QC	NaN	NaN	NaN	44.9996	0.0784484
Dengue / QC	_TC[Carbamidomethyl (C)]VADESAENC[Carbamidomethyl (C)]DKSLHTLFGDK_	P02768	-0.246406	0.246406	0.00932954	0.00639025	176	P02768	ALB	Serum albumin	ALBU_HUMAN	1	-15.7006	0.842994	Dengue	QC	NaN	NaN	NaN	35.994	0.133953
Dengue / QC	_STSSFPC[Carbamidomethyl (C)]PAGHFNGFR_	Q08380	-0.261132	0.261132	0.00713668	0.00507501	130	Q08380	LGALS3BP	Galectin-3-binding protein	LG3BP_HUMAN	1	-16.5567	0.834433	Dengue	QC	NaN	NaN	NaN	48.5834	0.130968
Dengue / QC	_DALSSVQESQVAQQAR_	B0YIW2;P02656	-0.345631	0.345631	4.28521e-06	7.08472e-06	176	B0YIW2;P02656	APOC3	Apolipoprotein C-III	B0YIW2_HUMAN;APOC3_HUMAN	1	-21.3036	0.786964	Dengue	QC	NaN	NaN	NaN	111.399	0.0760335
Dengue / QC	_SISTAYLQWSSLK_	A0A0C4DH38	-0.439069	0.439069	0.00648899	0.00468018	168	A0A0C4DH38	IGHV5-51	Immunoglobulin heavy variable 5-51	HV551_HUMAN	1	-26.2389	0.737611	Dengue	QC	NaN	NaN	NaN	53.7173	0.129772
Dengue / QC	_FVC[Carbamidomethyl (C)]NSGYK_	P08603	-0.272158	0.272158	0.0114655	0.00765426	158	P08603	CFH	Complement factor H	CFAH_HUMAN	1	-17.192	0.82808	Dengue	QC	NaN	NaN	NaN	41.7538	0.1388
Dengue / QC	_SVIPSDGPSVAC[Carbamidomethyl (C)]VK_	P02787	-0.267476	0.267476	0.0596096	0.0313804	176	P02787	TF	Serotransferrin	TRFE_HUMAN	1	-16.9228	0.830772	Dengue	QC	NaN	NaN	NaN	40.5469	0.188993
Dengue / QC	_GDGIPDRFSGSSSGAER_	A0A075B6H9	-0.199653	0.199653	0.00971317	0.00662705	138	A0A075B6H9	IGLV4-69	Immunoglobulin lambda variable 4-69	LV469_HUMAN	1	-12.924	0.87076	Dengue	QC	NaN	NaN	NaN	58.4152	0.136941
Dengue / QC	_GQPLSPEKYVTSAPMPEPQAPGR_	P01871	-0.338289	0.338289	0.00150569	0.00130428	176	P01871	IGHM	Immunoglobulin heavy constant mu	IGHM_HUMAN	1	-20.9021	0.790979	Dengue	QC	NaN	NaN	NaN	85.8738	0.111636
Dengue / QC	_AEDTAVYYC[Carbamidomethyl (C)]VR_	A0A0C4DH35	-0.326634	0.326634	0.00126048	0.00111461	174	A0A0C4DH35	IGHV3-35	Immunoglobulin heavy variable 3-35 (non-functional) (Fragment)	A0A0C4DH35_HUMAN	1	-20.2605	0.797395	Dengue	QC	NaN	NaN	NaN	53.4705	0.107321
Dengue / QC	_ASQGISSYLAWYQQKPGK_	A0A0C4DH67	-0.417076	0.417076	0.00720701	0.00511242	128	A0A0C4DH67	IGKV1-8	Immunoglobulin kappa variable 1-8	KV108_HUMAN	1	-25.1059	0.748941	Dengue	QC	NaN	NaN	NaN	45.1374	0.129823
Dengue / QC	_LKC[Carbamidomethyl (C)]ASLQK_	P02768	-0.556953	0.556953	0.253721	0.104353	176	P02768	ALB	Serum albumin	ALBU_HUMAN	1	-32.0264	0.679736	Dengue	QC	NaN	NaN	NaN	35.8158	0.314188
Dengue / QC	_ETLLQDFR_	P02760	-0.388719	0.388719	0.000176444	0.000195532	176	P02760	AMBP	Protein AMBP	AMBP_HUMAN	1	-23.6192	0.763808	Dengue	QC	NaN	NaN	NaN	119.734	0.0937887
Dengue / QC	_LLGEVDHYQLALGK_	O75636	-0.50325	0.50325	0.0151235	0.00970555	108	O75636	FCN3	Ficolin-3	FCN3_HUMAN	1	-29.4484	0.705516	Dengue	QC	NaN	NaN	NaN	41.4686	0.143083
Dengue / QC	_TPEPRPSLSHLLSQYYGAGVAR_	Q96PD5	-0.347984	0.347984	0.0135523	0.00883576	170	Q96PD5	PGLYRP2	N-acetylmuramoyl-L-alanine amidase	PGRP2_HUMAN	1	-21.4319	0.785681	Dengue	QC	NaN	NaN	NaN	47.5854	0.141329
Dengue / QC	_AHTSFQISLSVSYTGSR_	P01023	0.53944	0.53944	0.579757	0.201905	40	P01023	A2M	Alpha-2-macroglobulin	A2MG_HUMAN	1	45.3409	1.45341	Dengue	QC	NaN	NaN	NaN	5.08347	0.612837
Dengue / QC	_KVEGTAFVIFGIQDGEQR_	P01024	-0.364177	0.364177	0.000610877	0.000586385	168	P01024	C3	Complement C3	CO3_HUMAN	1	-22.3088	0.776912	Dengue	QC	NaN	NaN	NaN	64.9931	0.10055
Dengue / QC	_GTDYHKQPWQAK_	B4E1Z4	-0.203165	0.203165	0.00304067	0.00241396	176	B4E1Z4	NaN	cDNA FLJ55673, highly similar to Complement factor B (EC 3.4.21.47)	B4E1Z4_HUMAN	1	-13.1357	0.868643	Dengue	QC	NaN	NaN	NaN	39.7871	0.114591
Dengue / QC	_SSQESYAHGTK_	P08603	-0.242453	0.242453	0.349733	0.135216	84	P08603	CFH	Complement factor H	CFAH_HUMAN	1	-15.4693	0.845307	Dengue	QC	NaN	NaN	NaN	16.9564	0.376046
Dengue / QC	_FLENEDR_	P01009	-0.34653	0.34653	0.00137355	0.00120253	154	P01009	SERPINA1	Alpha-1-antitrypsin	A1AT_HUMAN	1	-21.3526	0.786474	Dengue	QC	NaN	NaN	NaN	51.9814	0.106915
Dengue / QC	_LVNGQSHISLSK_	P0C0L5	-0.110359	0.110359	0.0150568	0.00966707	144	P0C0L5	C4B	Complement C4-B	CO4B_HUMAN	1	-7.36427	0.926357	Dengue	QC	NaN	NaN	NaN	40.4676	0.142404
Dengue / QC	_TC[Carbamidomethyl (C)]QVNGR_	B4E1Z4	-0.257671	0.257671	0.349763	0.135218	72	B4E1Z4	NaN	cDNA FLJ55673, highly similar to Complement factor B (EC 3.4.21.47)	B4E1Z4_HUMAN	1	-16.3563	0.836437	Dengue	QC	NaN	NaN	NaN	15.1419	0.374535
Dengue / QC	_GHLFLQTDQPIYNPGQR_	P0C0L5	-0.347742	0.347742	6.07899e-05	7.65011e-05	176	P0C0L5	C4B	Complement C4-B	CO4B_HUMAN	1	-21.4187	0.785813	Dengue	QC	NaN	NaN	NaN	68.0219	0.0844979
Dengue / QC	_LRTEGDGVYTLNDK_	P00738	-0.326912	0.326912	0.000873641	0.000805643	174	P00738	HP	Haptoglobin	HPT_HUMAN	1	-20.2759	0.797241	Dengue	QC	NaN	NaN	NaN	63.0214	0.103297
Dengue / QC	_GISMLNK_	Q06033;Q06033-2	-0.403671	0.403671	0.000415323	0.000416768	174	Q06033;Q06033-2	ITIH3	Inter-alpha-trypsin inhibitor heavy chain H3;Isoform 2 of Inter-alpha-trypsin inhibitor heavy chain H3	ITIH3_HUMAN	1	-24.4068	0.755932	Dengue	QC	NaN	NaN	NaN	66.5383	0.0970551
Dengue / QC	_LLIYDNNKR_	P01701	0.115028	0.115028	0.5799	0.20192	70	P01701	IGLV1-51	Immunoglobulin lambda variable 1-51	LV151_HUMAN	1	8.2996	1.083	Dengue	QC	NaN	NaN	NaN	13.4598	0.635377
Dengue / QC	_GSEAINAPGDNPAK_	Q9NZP8	-0.321097	0.321097	0.00138587	0.00121159	166	Q9NZP8	C1RL	Complement C1r subcomponent-like protein	C1RL_HUMAN	1	-19.9539	0.800461	Dengue	QC	NaN	NaN	NaN	58.2667	0.107229
Dengue / QC	_HIGWKDFTAYR_	P07996	-0.301127	0.301127	0.0566057	0.030017	52	P07996	THBS1	Thrombospondin-1	TSP1_HUMAN	1	-18.8382	0.811618	Dengue	QC	NaN	NaN	NaN	19.6011	0.177704
Dengue / QC	_TVRVPMMSDPK_	P36955	-0.466404	0.466404	0.546705	0.192664	40	P36955	SERPINF1	Pigment epithelium-derived factor	PEDF_HUMAN	1	-27.6234	0.723766	Dengue	QC	NaN	NaN	NaN	1.85944	0.492294
Dengue / QC	_EYTDASFTNR_	P00450	-0.338304	0.338304	0.00882177	0.00609235	174	P00450	CP	Ceruloplasmin	CERU_HUMAN	1	-20.9029	0.790971	Dengue	QC	NaN	NaN	NaN	42.7522	0.130656
Dengue / QC	_VVGGHPGNSPWTVSLR_	G3XAK1;P26927	-0.515178	0.515178	0.110594	0.0527249	136	G3XAK1;P26927	MST1	Hepatocyte growth factor-like protein	G3XAK1_HUMAN;HGFL_HUMAN	1	-30.0294	0.699706	Dengue	QC	NaN	NaN	NaN	16.2963	0.212474
Dengue / QC	_YVLPNFEVK_	P0C0L5	-0.348864	0.348864	0.000235008	0.000252116	174	P0C0L5	C4B	Complement C4-B	CO4B_HUMAN	1	-21.4798	0.785202	Dengue	QC	NaN	NaN	NaN	50.6314	0.0903357
Dengue / QC	_RWELC[Carbamidomethyl (C)]DIPR_	P00747	-0.48182	0.48182	0.338185	0.131571	36	P00747	PLG	Plasminogen	PLMN_HUMAN	1	-28.3926	0.716074	Dengue	QC	NaN	NaN	NaN	2.58265	0.304535
Dengue / QC	_IEDGTLASK_	P04114	-0.467119	0.467119	0.00920517	0.00631706	160	P04114	APOB	Apolipoprotein B-100	APOB_HUMAN	1	-27.6592	0.723408	Dengue	QC	NaN	NaN	NaN	39.3271	0.130149
Dengue / QC	_IASFSQNC[Carbamidomethyl (C)]DIYPGKDFVQPPTK_	P01042	-0.375085	0.375085	0.0183981	0.011525	176	P01042	KNG1	Kininogen-1	KNG1_HUMAN	1	-22.894	0.77106	Dengue	QC	NaN	NaN	NaN	42.3962	0.145009
Dengue / QC	_VTMSVDTSKNQFSLK_	A0A0C4DH34	-0.121675	0.121675	0.00209357	0.00174389	168	A0A0C4DH34	IGHV4-28	Immunoglobulin heavy variable 4-28	HV428_HUMAN	1	-8.08803	0.91912	Dengue	QC	NaN	NaN	NaN	61.9276	0.110672
Dengue / QC	_TLIYDTSNK_	A0A075B6I9	-0.486749	0.486749	0.0287155	0.0168571	120	A0A075B6I9	IGLV7-46	Immunoglobulin lambda variable 7-46	LV746_HUMAN	1	-28.6369	0.713631	Dengue	QC	NaN	NaN	NaN	111.146	0.160369
Dengue / QC	_MTQSPSSFSASTGDR_	A0A0C4DH67	-0.340099	0.340099	0.0290811	0.0170301	104	A0A0C4DH67	IGKV1-8	Immunoglobulin kappa variable 1-8	KV108_HUMAN	1	-21.0013	0.789987	Dengue	QC	NaN	NaN	NaN	75.1339	0.159715
Dengue / QC	_HSWTPAR_	P04211	-0.328985	0.328985	0.0124836	0.00823112	156	P04211	IGLV7-43	Immunoglobulin lambda variable 7-43	LV743_HUMAN	1	-20.3904	0.796096	Dengue	QC	NaN	NaN	NaN	62.6651	0.137961
Dengue / QC	_NEDSLVFVQTDKSIYKPGQTVK_	P01023	-0.254892	0.254892	0.0001591	0.000178462	174	P01023	A2M	Alpha-2-macroglobulin	A2MG_HUMAN	1	-16.195	0.83805	Dengue	QC	NaN	NaN	NaN	102.689	0.0904132
Dengue / QC	_NSLYLQMNSLK_	A0A0B4J1Y9	-0.373939	0.373939	9.8519e-06	1.50028e-05	160	A0A0B4J1Y9	IGHV3-72	Immunoglobulin heavy variable 3-72	HV372_HUMAN	1	-22.8327	0.771673	Dengue	QC	NaN	NaN	NaN	93.5084	0.0755639
Dengue / QC	_IDTALIK_	P01031	-0.313135	0.313135	0.00149968	0.00129927	174	P01031	C5	Complement C5	CO5_HUMAN	1	-19.5109	0.804891	Dengue	QC	NaN	NaN	NaN	40.7206	0.103737
Dengue / QC	_DYVSQFEGSALGK_	P02647	-0.383967	0.383967	0.0168052	0.0106253	172	P02647	APOA1	Apolipoprotein A-I	APOA1_HUMAN	1	-23.3672	0.766328	Dengue	QC	NaN	NaN	NaN	57.1666	0.143354
Dengue / QC	_GDVAFVK_	P02787	-0.340209	0.340209	0.000156286	0.000175956	176	P02787	TF	Serotransferrin	TRFE_HUMAN	1	-21.0073	0.789927	Dengue	QC	NaN	NaN	NaN	64.8005	0.0877907
Dengue / QC	_FEGIAC[Carbamidomethyl (C)]EISK_	P02748	-0.362134	0.362134	4.11698e-06	6.82614e-06	174	P02748	C9	Complement component C9	CO9_HUMAN	1	-22.1987	0.778013	Dengue	QC	NaN	NaN	NaN	74.7157	0.0707495
Dengue / QC	_RLIYAASSLQSGVPSR_	P01599	-0.405901	0.405901	0.00604415	0.00440205	166	P01599	IGKV1-17	Immunoglobulin kappa variable 1-17	KV117_HUMAN	1	-24.5235	0.754765	Dengue	QC	NaN	NaN	NaN	80.8903	0.124706
Dengue / QC	_HQTVPQNTGGK_	P02787	0.0716705	0.0716705	0.461115	0.168273	134	P02787	TF	Serotransferrin	TRFE_HUMAN	1	5.09329	1.05093	Dengue	QC	NaN	NaN	NaN	28.5269	0.469409
Dengue / QC	_KLSSWVLLM[Oxidation (M)]K_	P01009	-0.32918	0.32918	0.00587434	0.00429376	112	P01009	SERPINA1	Alpha-1-antitrypsin	A1AT_HUMAN	1	-20.4011	0.795989	Dengue	QC	NaN	NaN	NaN	46.4242	0.121374
Dengue / QC	_KLSSWVLLMK_	P01009	-0.330502	0.330502	1.71297e-05	2.46806e-05	164	P01009	SERPINA1	Alpha-1-antitrypsin	A1AT_HUMAN	1	-20.474	0.79526	Dengue	QC	NaN	NaN	NaN	136.167	0.0786194
Dengue / QC	_VQPYLDDFQKK_	P02647	-0.331422	0.331422	0.000104827	0.00012397	176	P02647	APOA1	Apolipoprotein A-I	APOA1_HUMAN	1	-20.5247	0.794753	Dengue	QC	NaN	NaN	NaN	62.3959	0.0844961
Dengue / QC	_SDVVYTDWKK_	P02763	-0.352286	0.352286	0.00597915	0.00436153	176	P02763	ORM1	Alpha-1-acid glycoprotein 1	A1AG1_HUMAN	1	-21.6658	0.783342	Dengue	QC	NaN	NaN	NaN	51.2437	0.121973
Dengue / QC	_FNAVLTNPQGDYDTSTGK_	P02747	-0.366307	0.366307	0.00128899	0.0011374	174	P02747	C1QC	Complement C1q subcomponent subunit C	C1QC_HUMAN	1	-22.4234	0.775766	Dengue	QC	NaN	NaN	NaN	56.7296	0.103214
Dengue / QC	_SRVTISVDTSKNQFSLK_	P06331	-0.35199	0.35199	0.00491275	0.00367041	162	P06331	IGHV4-34	Immunoglobulin heavy variable 4-34	HV434_HUMAN	1	-21.6497	0.783503	Dengue	QC	NaN	NaN	NaN	90.9683	0.120769
Dengue / QC	_YSSDYFQAPSDYR_	Q08380	-0.339766	0.339766	0.0126174	0.00830698	172	Q08380	LGALS3BP	Galectin-3-binding protein	LG3BP_HUMAN	1	-20.983	0.79017	Dengue	QC	NaN	NaN	NaN	88.9637	0.13649
Dengue / QC	_LPPTTTC[Carbamidomethyl (C)]QQQKEELLPAQDIK_	B4E1Z4	-0.382165	0.382165	0.00252353	0.0020537	174	B4E1Z4	NaN	cDNA FLJ55673, highly similar to Complement factor B (EC 3.4.21.47)	B4E1Z4_HUMAN	1	-23.2715	0.767285	Dengue	QC	NaN	NaN	NaN	54.0989	0.109651
Dengue / QC	_WNFYYSPQSSPDKK_	P04114	-0.0223012	0.0223012	0.204925	0.08747	66	P04114	APOB	Apolipoprotein B-100	APOB_HUMAN	1	-1.53392	0.984661	Dengue	QC	NaN	NaN	NaN	14.0122	0.260913
Dengue / QC	_C[Carbamidomethyl (C)]DEWSVNSVGKIEC[Carbamidomethyl (C)]VSAETTEDC[Carbamidomethyl (C)]IAK_	P02787	-0.258149	0.258149	0.0433763	0.0240701	176	P02787	TF	Serotransferrin	TRFE_HUMAN	1	-16.384	0.83616	Dengue	QC	NaN	NaN	NaN	37.6013	0.165335
Dengue / QC	_ALDLSLK_	Q06033;Q06033-2	-0.329345	0.329345	0.00325259	0.00256246	176	Q06033;Q06033-2	ITIH3	Inter-alpha-trypsin inhibitor heavy chain H3;Isoform 2 of Inter-alpha-trypsin inhibitor heavy chain H3	ITIH3_HUMAN	1	-20.4102	0.795898	Dengue	QC	NaN	NaN	NaN	52.4443	0.112066
Dengue / QC	_AAFTEC[Carbamidomethyl (C)]C[Carbamidomethyl (C)]QAADK_	P02768	-0.270268	0.270268	0.00499186	0.00372181	176	P02768	ALB	Serum albumin	ALBU_HUMAN	1	-17.0834	0.829166	Dengue	QC	NaN	NaN	NaN	53.5182	0.117956
Dengue / QC	_SASNMAIVDVK_	P01023	-0.314359	0.314359	7.4884e-07	1.46667e-06	176	P01023	A2M	Alpha-2-macroglobulin	A2MG_HUMAN	1	-19.5792	0.804208	Dengue	QC	NaN	NaN	NaN	82.1445	0.0644223
Dengue / QC	_TKVFQLK_	P01023	-0.288191	0.288191	0.00728926	0.00515935	156	P01023	A2M	Alpha-2-macroglobulin	A2MG_HUMAN	1	-18.1072	0.818928	Dengue	QC	NaN	NaN	NaN	73.0007	0.124472
Dengue / QC	_VGFYESDVM[Oxidation (M)]GR_	P01023	-0.332565	0.332565	0.00367386	0.00284692	174	P01023	A2M	Alpha-2-macroglobulin	A2MG_HUMAN	1	-20.5877	0.794123	Dengue	QC	NaN	NaN	NaN	125.031	0.116057
Dengue / QC	_NMATRPYSIHAHGVQTESSTVTPTLPGETLTYVWK_	P00450	-0.387033	0.387033	0.000439105	0.000437815	164	P00450	CP	Ceruloplasmin	CERU_HUMAN	1	-23.5299	0.764701	Dengue	QC	NaN	NaN	NaN	74.6238	0.0933286
Dengue / QC	_SGFPQVSMFFTHTFPK_	P04196	-0.22187	0.22187	0.000456567	0.00045305	168	P04196	HRG	Histidine-rich glycoprotein	HRG_HUMAN	1	-14.2547	0.857453	Dengue	QC	NaN	NaN	NaN	49.0186	0.0913407
Dengue / QC	_QPSSAFAAFVK_	P01024	-0.382647	0.382647	1.15687e-05	1.73476e-05	164	P01024	C3	Complement C3	CO3_HUMAN	1	-23.2971	0.767029	Dengue	QC	NaN	NaN	NaN	98.2309	0.0740799
Dengue / QC	_HPNVFGFC[Carbamidomethyl (C)]R_	P04196	-0.373305	0.373305	1.47936e-05	2.16538e-05	176	P04196	HRG	Histidine-rich glycoprotein	HRG_HUMAN	1	-22.7988	0.772012	Dengue	QC	NaN	NaN	NaN	63.5856	0.0724513
Dengue / QC	_FAAFIDK_	A0A087X106;O43790;P78385;P78386;Q14533;U3KPR1	-0.334514	0.334514	0.0221509	0.0135307	130	A0A087X106;O43790;P78385;P78386;Q14533;U3KPR1	KRT81;KRT86;KRT83;KRT85;KRT81;KRT86	Keratin, type II cuticular Hb1;Keratin, type II cuticular Hb6;Keratin, type II cuticular Hb3;Keratin, type II cuticular Hb5;Keratin, type II cuticular Hb1;Keratin, type II cuticular Hb6 (Fragment)	A0A087X106_HUMAN;KRT86_HUMAN;KRT83_HUMAN;KRT85_HUMAN;KRT81_HUMAN;U3KPR1_HUMAN	1	-20.6949	0.793051	Dengue	QC	NaN	NaN	NaN	33.928	0.14152
Dengue / QC	_AKLEEQAQQIR_	P02649	-0.235026	0.235026	0.00454762	0.00343273	148	P02649	APOE	Apolipoprotein E	APOE_HUMAN	1	-15.0331	0.849669	Dengue	QC	NaN	NaN	NaN	59.2075	0.115007
Dengue / QC	_AAVYHHFISDGVRK_	P01024	-0.211121	0.211121	0.0200446	0.0123875	176	P01024	C3	Complement C3	CO3_HUMAN	1	-13.6134	0.863866	Dengue	QC	NaN	NaN	NaN	53.5171	0.141257
Dengue / QC	_AEDTAVYYC[Carbamidomethyl (C)]AR_	A0A0J9YVT0;P0DP02	-0.240746	0.240746	0.0264997	0.0157243	176	A0A0J9YVT0;P0DP02	IGHV3-33;IGHV3-30-3	Immunoglobulin heavy variable 3-33 (Fragment);Immunoglobulin heavy variable 3-30-3	A0A0J9YVT0_HUMAN;HVC33_HUMAN	1	-15.3692	0.846308	Dengue	QC	NaN	NaN	NaN	46.9085	0.147631
Dengue / QC	_LNNGEITQHR_	P04003	-0.179009	0.179009	0.0864585	0.0429908	118	P04003	C4BPA	C4b-binding protein alpha chain	C4BPA_HUMAN	1	-11.669	0.88331	Dengue	QC	NaN	NaN	NaN	29.3589	0.190394
Dengue / QC	_IPAC[Carbamidomethyl (C)]IAGER_	P59665;P59666	-0.308584	0.308584	0.0541607	0.0289359	142	P59665;P59666	DEFA1;DEFA3	Neutrophil defensin 1;Neutrophil defensin 3	DEF1_HUMAN;DEF3_HUMAN	1	-19.2566	0.807434	Dengue	QC	NaN	NaN	NaN	137.076	0.173822
Dengue / QC	_NRDVVLTTTFVDDIK_	P02748	-0.261927	0.261927	0.0104382	0.00705582	174	P02748	C9	Complement component C9	CO9_HUMAN	1	-16.6026	0.833974	Dengue	QC	NaN	NaN	NaN	39.4144	0.125415
Dengue / QC	_VDNALQSGNSQESVTEQDSKDSTYSLSSTLTLSKADYEK_	P01834	-0.0802013	0.0802013	0.370007	0.141527	176	P01834	IGKC	Immunoglobulin kappa constant	IGKC_HUMAN	1	-5.40744	0.945926	Dengue	QC	NaN	NaN	NaN	53.043	0.372675
Dengue / QC	_FSGSGSGTDFTLK_	A0A087X0Q4	-0.361171	0.361171	2.28062e-05	3.18799e-05	176	A0A087X0Q4	IGKV2-40	Immunoglobulin kappa variable 2-40	A0A087X0Q4_HUMAN	1	-22.1468	0.778532	Dengue	QC	NaN	NaN	NaN	70.8906	0.0742343
Dengue / QC	_C[Carbamidomethyl (C)]AGPEAVKGQTLLAVAK_	P02750	-0.269949	0.269949	0.0092321	0.00633404	170	P02750	LRG1	Leucine-rich alpha-2-glycoprotein	A2GL_HUMAN	1	-17.0651	0.829349	Dengue	QC	NaN	NaN	NaN	53.6321	0.124353
Dengue / QC	_S[Acetyl (Protein N-term)]DKPDMAEIEKFDK_	P62328	-0.308127	0.308127	0.0068287	0.00488854	154	P62328	TMSB4X	Thymosin beta-4	TYB4_HUMAN	1	-19.231	0.80769	Dengue	QC	NaN	NaN	NaN	50.6754	0.118938
Dengue / QC	_YAYLLQPSQFHGEPC[Carbamidomethyl (C)]NFSDKEVEDC[Carbamidomethyl (C)]VTNRPC[Carbamidomethyl (C)]R_	P07358	-0.335341	0.335341	0.00685436	0.00490204	148	P07358	C8B	Complement component C8 beta chain	CO8B_HUMAN	1	-20.7403	0.792597	Dengue	QC	NaN	NaN	NaN	47.8683	0.118479
Dengue / QC	_GYTQQLAFRQPSSAFAAFVKR_	P01024	-0.383371	0.383371	0.00109853	0.000986849	172	P01024	C3	Complement C3	CO3_HUMAN	1	-23.3356	0.766644	Dengue	QC	NaN	NaN	NaN	52.0282	0.0968599
Dengue / QC	_YLTSEMHGARPGASK_	P04275	0.0224066	0.0224066	0.264151	0.107929	34	P04275	VWF	von Willebrand factor	VWF_HUMAN	1	1.56523	1.01565	Dengue	QC	NaN	NaN	NaN	14.2145	0.287631
Dengue / QC	_VVSMDENFHPLNELIPLVYIQDPK_	P01023	-0.276174	0.276174	0.0265286	0.0157382	176	P01023	A2M	Alpha-2-macroglobulin	A2MG_HUMAN	1	-17.4222	0.825778	Dengue	QC	NaN	NaN	NaN	48.6571	0.145618
Dengue / QC	_ANTVQEATFQMELPKK_	Q14624	-0.307534	0.307534	0.000246975	0.000263507	176	Q14624	ITIH4	Inter-alpha-trypsin inhibitor heavy chain H4	ITIH4_HUMAN	1	-19.1978	0.808022	Dengue	QC	NaN	NaN	NaN	43.0182	0.0831101
Dengue / QC	_NIQSLEVIGK_	P02775	-0.352591	0.352591	2.10627e-05	2.96854e-05	172	P02775	PPBP	Platelet basic protein	CXCL7_HUMAN	1	-21.6824	0.783176	Dengue	QC	NaN	NaN	NaN	69.2803	0.0725788
Dengue / QC	_KYLYEIAR_	P02768	-0.300522	0.300522	0.0004657	0.000460591	176	P02768	ALB	Serum albumin	ALBU_HUMAN	1	-18.8041	0.811959	Dengue	QC	NaN	NaN	NaN	48.7829	0.0882529
Dengue / QC	_TPLGDTTHTC[Carbamidomethyl (C)]PR_	P01860	-0.381642	0.381642	0.00339316	0.00265471	174	P01860	IGHG3	Immunoglobulin heavy constant gamma 3	IGHG3_HUMAN	1	-23.2437	0.767563	Dengue	QC	NaN	NaN	NaN	82.6164	0.109515
Dengue / QC	_IC[Carbamidomethyl (C)]LDPDAPR_	P02775	-0.32302	0.32302	3.18682e-05	4.30833e-05	176	P02775	PPBP	Platelet basic protein	CXCL7_HUMAN	1	-20.0605	0.799395	Dengue	QC	NaN	NaN	NaN	81.5598	0.0749953
Dengue / QC	_LVHVEEPHTETVRK_	P01023	-0.191739	0.191739	0.0607903	0.0318873	174	P01023	A2M	Alpha-2-macroglobulin	A2MG_HUMAN	1	-12.4451	0.875549	Dengue	QC	NaN	NaN	NaN	71.5764	0.173077
Dengue / QC	_INHC[Carbamidomethyl (C)]RFDEFFSEGC[Carbamidomethyl (C)]APGSK_	P02787	-0.286569	0.286569	0.000162752	0.000182098	176	P02787	TF	Serotransferrin	TRFE_HUMAN	1	-18.0151	0.819849	Dengue	QC	NaN	NaN	NaN	57.2529	0.0816661
Dengue / QC	_TKPREEQFNSTFR_	P01859	-0.264298	0.264298	0.0172082	0.0108503	108	P01859	IGHG2	Immunoglobulin heavy constant gamma 2	IGHG2_HUMAN	1	-16.7396	0.832604	Dengue	QC	NaN	NaN	NaN	70.385	0.134789
Dengue / QC	_VAAEDWK_	A0A0G2JMB2	-0.357431	0.357431	0.000690623	0.000653904	176	A0A0G2JMB2	IGHA2	Immunoglobulin heavy constant alpha 2 (Fragment)	A0A0G2JMB2_HUMAN	1	-21.9447	0.780553	Dengue	QC	NaN	NaN	NaN	98.3721	0.0938435
Dengue / QC	_LSSWVLLM[Oxidation (M)]K_	P01009	-0.413406	0.413406	0.00988245	0.00672268	130	P01009	SERPINA1	Alpha-1-antitrypsin	A1AT_HUMAN	1	-24.9151	0.750849	Dengue	QC	NaN	NaN	NaN	47.9351	0.122233
Dengue / QC	_FMQAVTGWK_	P01019	-0.391529	0.391529	0.000174586	0.000193873	170	P01019	AGT	Angiotensinogen	ANGT_HUMAN	1	-23.7679	0.762321	Dengue	QC	NaN	NaN	NaN	75.9414	0.0830913
Dengue / QC	_SVSGSPGQSVTISC[Carbamidomethyl (C)]TGTSSDVGGYNYVSWYQQHPGK_	P01706	-0.255837	0.255837	0.0237297	0.0143362	140	P01706	IGLV2-11	Immunoglobulin lambda variable 2-11	LV211_HUMAN	1	-16.2499	0.837501	Dengue	QC	NaN	NaN	NaN	58.7766	0.141284
Dengue / QC	_YEGGREHVAHLLFLR_	P19652	-0.313269	0.313269	0.00083928	0.000776937	176	P19652	ORM2	Alpha-1-acid glycoprotein 2	A1AG2_HUMAN	1	-19.5184	0.804816	Dengue	QC	NaN	NaN	NaN	112.238	0.0955267
Dengue / QC	_EPQVYTLPPSR_	P01857	-0.305112	0.305112	0.00271946	0.00218938	176	P01857	IGHG1	Immunoglobulin heavy constant gamma 1	IGHG1_HUMAN	1	-19.0621	0.809379	Dengue	QC	NaN	NaN	NaN	54.5134	0.104224
Dengue / QC	_KGHVSFKPSLDQQR_	Q06033;Q06033-2	-0.299292	0.299292	0.024128	0.0145459	144	Q06033;Q06033-2	ITIH3	Inter-alpha-trypsin inhibitor heavy chain H3;Isoform 2 of Inter-alpha-trypsin inhibitor heavy chain H3	ITIH3_HUMAN	1	-18.7349	0.812651	Dengue	QC	NaN	NaN	NaN	63.1162	0.14153
Dengue / QC	_ASQSISSYLNWYQQKPGK_	P01597;P04432	-0.222326	0.222326	0.0288407	0.0169202	128	P01597;P04432	IGKV1-39;IGKV1D-39	Immunoglobulin kappa variable 1-39;Immunoglobulin kappa variable 1D-39	KV139_HUMAN;KVD39_HUMAN	1	-14.2818	0.857182	Dengue	QC	NaN	NaN	NaN	53.5919	0.145527
Dengue / QC	_KPDVSHGEMVSGFGPIYNYKDTIVFK_	P04003	-0.360061	0.360061	0.0127487	0.00838474	176	P04003	C4BPA	C4b-binding protein alpha chain	C4BPA_HUMAN	1	-22.0868	0.779132	Dengue	QC	NaN	NaN	NaN	37.4413	0.124917
Dengue / QC	_GILNEIKDR_	P07358	-0.319889	0.319889	0.0218757	0.0133842	152	P07358	C8B	Complement component C8 beta chain	CO8B_HUMAN	1	-19.8868	0.801132	Dengue	QC	NaN	NaN	NaN	32.8766	0.135711
Dengue / QC	_GQPSVLQVVNLPIVERPVC[Carbamidomethyl (C)]K_	P00734	-0.31506	0.31506	0.0223633	0.0136445	176	P00734	F2	Prothrombin	THRB_HUMAN	1	-19.6183	0.803817	Dengue	QC	NaN	NaN	NaN	54.2685	0.138837
Dengue / QC	_GQTLLAVAK_	P02750	-0.348409	0.348409	0.00314651	0.00248601	176	P02750	LRG1	Leucine-rich alpha-2-glycoprotein	A2GL_HUMAN	1	-21.455	0.78545	Dengue	QC	NaN	NaN	NaN	64.6859	0.106284
Dengue / QC	_KGDTFSC[Carbamidomethyl (C)]M[Oxidation (M)]VGHEALPLAFTQK_	A0A0G2JMB2	-0.280421	0.280421	0.00118906	0.00105812	176	A0A0G2JMB2	IGHA2	Immunoglobulin heavy constant alpha 2 (Fragment)	A0A0G2JMB2_HUMAN	1	-17.6649	0.823351	Dengue	QC	NaN	NaN	NaN	115.025	0.098047
Dengue / QC	_MYLGYEYVTAIR_	P02787	-0.285281	0.285281	0.000218616	0.000236397	176	P02787	TF	Serotransferrin	TRFE_HUMAN	1	-17.9418	0.820582	Dengue	QC	NaN	NaN	NaN	60.3975	0.0828623
Dengue / QC	_MALEVYK_	P04003	-0.289823	0.289823	0.000375666	0.000381349	176	P04003	C4BPA	C4b-binding protein alpha chain	C4BPA_HUMAN	1	-18.1998	0.818002	Dengue	QC	NaN	NaN	NaN	41.5637	0.0839906
Dengue / QC	_GSEMVVAGK_	Q14624	-0.232752	0.232752	0.0100453	0.0068214	168	Q14624	ITIH4	Inter-alpha-trypsin inhibitor heavy chain H4	ITIH4_HUMAN	1	-14.899	0.85101	Dengue	QC	NaN	NaN	NaN	42.2649	0.120583
Dengue / QC	_LLIYAASTLQSGVPSR_	A0A0C4DH67	-0.401467	0.401467	0.00607085	0.00441725	154	A0A0C4DH67	IGKV1-8	Immunoglobulin kappa variable 1-8	KV108_HUMAN	1	-24.2912	0.757088	Dengue	QC	NaN	NaN	NaN	102.861	0.115797
Dengue / QC	_TKPREEQYNSTYR_	P01857	-0.412071	0.412071	0.0127529	0.00838474	154	P01857	IGHG1	Immunoglobulin heavy constant gamma 1	IGHG1_HUMAN	1	-24.8456	0.751544	Dengue	QC	NaN	NaN	NaN	60.3938	0.126008
Dengue / QC	_GMTNINDGLLR_	Q06033;Q06033-2	-0.23386	0.23386	0.00446843	0.00337604	168	Q06033;Q06033-2	ITIH3	Inter-alpha-trypsin inhibitor heavy chain H3;Isoform 2 of Inter-alpha-trypsin inhibitor heavy chain H3	ITIH3_HUMAN	1	-14.9643	0.850357	Dengue	QC	NaN	NaN	NaN	62.2246	0.109422
Dengue / QC	_ITC[Carbamidomethyl (C)]QGDSLR_	P01714	-0.310573	0.310573	0.00904326	0.00622372	174	P01714	IGLV3-19	Immunoglobulin lambda variable 3-19	LV319_HUMAN	1	-19.3679	0.806321	Dengue	QC	NaN	NaN	NaN	127.484	0.121734
Dengue / QC	_AMAVEDIISR_	P07357	-0.327751	0.327751	0.0110834	0.00742842	160	P07357	C8A	Complement component C8 alpha chain	CO8A_HUMAN	1	-20.3222	0.796778	Dengue	QC	NaN	NaN	NaN	47.8581	0.121982
Dengue / QC	_GPEEEHLGILGPVIWAEVGDTIR_	P00450	-0.0221619	0.0221619	0.194524	0.0837379	176	P00450	CP	Ceruloplasmin	CERU_HUMAN	1	-1.52441	0.984756	Dengue	QC	NaN	NaN	NaN	36.0868	0.243747
Dengue / QC	_DLYSGLIGPLIVC[Carbamidomethyl (C)]R_	P00450	-0.27275	0.27275	0.0311457	0.0180814	176	P00450	CP	Ceruloplasmin	CERU_HUMAN	1	-17.226	0.82774	Dengue	QC	NaN	NaN	NaN	52.6843	0.145448
Dengue / QC	_YVMLPVADQDQC[Carbamidomethyl (C)]IR_	P00738	-0.311212	0.311212	0.000503113	0.000493282	176	P00738	HP	Haptoglobin	HPT_HUMAN	1	-19.4035	0.805965	Dengue	QC	NaN	NaN	NaN	116.948	0.0899716
Dengue / QC	_GTEAAGAM[Oxidation (M)]FLEAIPMSIPPEVK_	P01009	0.0680513	0.0680513	0.289828	0.116415	156	P01009	SERPINA1	Alpha-1-antitrypsin	A1AT_HUMAN	1	4.82998	1.0483	Dengue	QC	NaN	NaN	NaN	40.4888	0.299
Dengue / QC	_TYSDHPEKVNKDDEEFIESNK_	P00450	-0.304917	0.304917	9.27612e-05	0.00011109	172	P00450	CP	Ceruloplasmin	CERU_HUMAN	1	-19.0511	0.809489	Dengue	QC	NaN	NaN	NaN	72.4139	0.0774594
Dengue / QC	_S[Phospho (STY)]LHTLFGDKLC[Carbamidomethyl (C)]TVATLR_	P02768	0.366862	0.366862	0.737601	0.243142	138	P02768	ALB	Serum albumin	ALBU_HUMAN	1	28.9545	1.28955	Dengue	QC	NaN	NaN	NaN	15.0434	0.938733
Dengue / QC	_KYWNDC[Carbamidomethyl (C)]EPPDSR_	P04196	-0.298354	0.298354	0.000371066	0.000377411	176	P04196	HRG	Histidine-rich glycoprotein	HRG_HUMAN	1	-18.682	0.81318	Dengue	QC	NaN	NaN	NaN	64.8192	0.0850755
Dengue / QC	_ASNDMYHSR_	P01034	-0.442959	0.442959	0.110497	0.0526874	34	P01034	CST3	Cystatin-C	CYTC_HUMAN	1	-26.4376	0.735624	Dengue	QC	NaN	NaN	NaN	22.9095	0.192301
Dengue / QC	_LYGSEAFATDFQDSAAAK_	P01011	-0.422256	0.422256	0.0590037	0.0311113	168	P01011	SERPINA3	Alpha-1-antichymotrypsin	AACT_HUMAN	1	-25.3743	0.746257	Dengue	QC	NaN	NaN	NaN	59.7834	0.165744
Dengue / QC	_FM[Oxidation (M)]ETVAEK_	P10909;P10909-2;P10909-4;P10909-5	-0.302759	0.302759	0.266198	0.108649	74	P10909;P10909-2;P10909-4;P10909-5	CLU	Clusterin;Isoform 2 of Clusterin;Isoform 4 of Clusterin;Isoform 5 of Clusterin	CLUS_HUMAN	1	-18.93	0.8107	Dengue	QC	NaN	NaN	NaN	14.9985	0.276089
Dengue / QC	_QTHQPPAPNSLIR_	P02747	-0.230555	0.230555	0.0203172	0.0125326	176	P02747	C1QC	Complement C1q subcomponent subunit C	C1QC_HUMAN	1	-14.7693	0.852307	Dengue	QC	NaN	NaN	NaN	38.2431	0.131686
Dengue / QC	_SEETKENEGFTVTAEGK_	P01024	-0.305346	0.305346	0.00250965	0.00204356	176	P01024	C3	Complement C3	CO3_HUMAN	1	-19.0752	0.809248	Dengue	QC	NaN	NaN	NaN	51.8687	0.100187
Dengue / QC	_C[Carbamidomethyl (C)]C[Carbamidomethyl (C)]TESLVNRR_	P02768	-0.307945	0.307945	0.107385	0.0514459	166	P02768	ALB	Serum albumin	ALBU_HUMAN	1	-19.2209	0.807791	Dengue	QC	NaN	NaN	NaN	39.8521	0.19298
Dengue / QC	_DRSPC[Carbamidomethyl (C)]YGYQWVSEEHEEAHHTAYLVFSPSK_	P01023	-0.316403	0.316403	0.0139296	0.009044	144	P01023	A2M	Alpha-2-macroglobulin	A2MG_HUMAN	1	-19.693	0.80307	Dengue	QC	NaN	NaN	NaN	59.5213	0.125408
Dengue / QC	_LC[Carbamidomethyl (C)]M[Oxidation (M)]GSGLNLC[Carbamidomethyl (C)]EPNNK_	P02787	-0.273385	0.273385	0.000372813	0.000379121	170	P02787	TF	Serotransferrin	TRFE_HUMAN	1	-17.2624	0.827376	Dengue	QC	NaN	NaN	NaN	65.1433	0.0846409
Dengue / QC	_SM[Oxidation (M)]EDKGMTNINDGLLR_	Q06033;Q06033-2	0.528025	0.528025	0.811809	0.261128	10	Q06033;Q06033-2	ITIH3	Inter-alpha-trypsin inhibitor heavy chain H3;Isoform 2 of Inter-alpha-trypsin inhibitor heavy chain H3	ITIH3_HUMAN	1	44.1953	1.44195	Dengue	QC	NaN	NaN	NaN	1.711	1.14774
Dengue / QC	_SLPAPWLSM[Oxidation (M)]APVSWITPGLK_	P04217	0.296109	0.296109	0.170469	0.0751914	162	P04217	A1BG	Alpha-1B-glycoprotein	A1BG_HUMAN	1	22.7828	1.22783	Dengue	QC	NaN	NaN	NaN	53.0764	0.228374
Dengue / QC	_EPQVYTLPPSRDELTK_	P01857	-0.31984	0.31984	0.118204	0.0557814	172	P01857	IGHG1	Immunoglobulin heavy constant gamma 1	IGHG1_HUMAN	1	-19.8842	0.801158	Dengue	QC	NaN	NaN	NaN	45.4891	0.199071
Dengue / QC	_SC[Carbamidomethyl (C)]HTGLGR_	P02787	-0.268888	0.268888	0.483627	0.174812	120	P02787	TF	Serotransferrin	TRFE_HUMAN	1	-17.0041	0.829959	Dengue	QC	NaN	NaN	NaN	22.7155	0.445074
Dengue / QC	_ESLSSYWESAK_	A0A024R0T9;K7ER74;P02655	-0.295058	0.295058	0.000998766	0.000906256	146	A0A024R0T9;K7ER74;P02655	APOC4-APOC2;APOC4-APOC2;APOC2	Apolipoprotein C-II isoform 1;APOC4-APOC2 readthrough (NMD candidate);Apolipoprotein C-II	A0A024R0T9_HUMAN;K7ER74_HUMAN;APOC2_HUMAN	1	-18.496	0.81504	Dengue	QC	NaN	NaN	NaN	117.532	0.0938685
Dengue / QC	_VM[Oxidation (M)]DKYTFELSR_	P02774;P02774-3	-0.609754	0.609754	0.287576	0.115849	170	P02774;P02774-3	GC	Vitamin D-binding protein;Isoform 3 of Vitamin D-binding protein	VTDB_HUMAN	1	-34.4692	0.655308	Dengue	QC	NaN	NaN	NaN	36.3105	0.293576
Dengue / QC	_HSTIFENLANK_	P02787	-0.347718	0.347718	8.09321e-06	1.25498e-05	176	P02787	TF	Serotransferrin	TRFE_HUMAN	1	-21.4174	0.785826	Dengue	QC	NaN	NaN	NaN	95.5034	0.0671246
Dengue / QC	_MVSGFIPLKPTVK_	P01023	-0.372498	0.372498	0.00147418	0.00127978	176	P01023	A2M	Alpha-2-macroglobulin	A2MG_HUMAN	1	-22.7556	0.772444	Dengue	QC	NaN	NaN	NaN	66.9111	0.0954806
Dengue / QC	_EANYIGSDK_	P0DJI8	-0.308541	0.308541	0.13653	0.0627711	98	P0DJI8	SAA1	Serum amyloid A-1 protein	SAA1_HUMAN	1	-19.2542	0.807458	Dengue	QC	NaN	NaN	NaN	81.7665	0.210282
Dengue / QC	_C[Carbamidomethyl (C)]EGSSVQTR_	P07996	-0.10981	0.10981	0.508456	0.181941	36	P07996	THBS1	Thrombospondin-1	TSP1_HUMAN	1	-7.32897	0.92671	Dengue	QC	NaN	NaN	NaN	1.77759	0.386181
Dengue / QC	_HTFM[Oxidation (M)]GVVSLGSPSGEVSHPR_	P02765	-0.303682	0.303682	0.000424961	0.000425146	176	P02765	AHSG	Alpha-2-HS-glycoprotein	FETUA_HUMAN	1	-18.9818	0.810182	Dengue	QC	NaN	NaN	NaN	66.8474	0.0850435
Dengue / QC	_MVGLEGSDKLTILR_	Q15485	-0.286257	0.286257	0.0880558	0.0436646	116	Q15485	FCN2	Ficolin-2	FCN2_HUMAN	1	-17.9973	0.820027	Dengue	QC	NaN	NaN	NaN	36.8796	0.179994
Dengue / QC	_SVPPSASHVAPTETFTYEWTVPK_	P00450	-0.333013	0.333013	0.0384208	0.021664	176	P00450	CP	Ceruloplasmin	CERU_HUMAN	1	-20.6123	0.793877	Dengue	QC	NaN	NaN	NaN	46.0149	0.147785
Dengue / QC	_PLVEEPQNLIK_	P02768	-0.360801	0.360801	4.1588e-06	6.88954e-06	158	P02768	ALB	Serum albumin	ALBU_HUMAN	1	-22.1268	0.778732	Dengue	QC	NaN	NaN	NaN	94.8325	0.0643951
Dengue / QC	_VLMSVLNDNSR_	P06681	-0.309648	0.309648	0.000255957	0.000271784	152	P06681	C2	Complement C2	CO2_HUMAN	1	-19.3161	0.806839	Dengue	QC	NaN	NaN	NaN	54.3889	0.0801937
Dengue / QC	_AREDIFMETLK_	P25311	-0.270011	0.270011	1.96527e-05	2.78888e-05	168	P25311	AZGP1	Zinc-alpha-2-glycoprotein	ZA2G_HUMAN	1	-17.0687	0.829313	Dengue	QC	NaN	NaN	NaN	76.5932	0.0689254
Dengue / QC	_IWLDNVR_	O43866	-0.31498	0.31498	0.000475306	0.000468246	176	O43866	CD5L	CD5 antigen-like	CD5L_HUMAN	1	-19.6138	0.803862	Dengue	QC	NaN	NaN	NaN	98.3479	0.0867646
Dengue / QC	_YFKPGMPFDLMVFVTNPDGSPAYR_	P01024	-0.215552	0.215552	0.0645699	0.0335345	176	P01024	C3	Complement C3	CO3_HUMAN	1	-13.8783	0.861217	Dengue	QC	NaN	NaN	NaN	44.133	0.165375
Dengue / QC	_QFVTATDVVR_	P13796	-0.286662	0.286662	0.0193339	0.0120134	90	P13796	LCP1	Plastin-2	PLSL_HUMAN	1	-18.0203	0.819797	Dengue	QC	NaN	NaN	NaN	75.9713	0.131043
Dengue / QC	_NTAYLQMNSLK_	A0A0B4J1V6	-0.372349	0.372349	0.00090343	0.000830194	122	A0A0B4J1V6	IGHV3-73	Immunoglobulin heavy variable 3-73	HV373_HUMAN	1	-22.7476	0.772524	Dengue	QC	NaN	NaN	NaN	86.2811	0.0909052
Dengue / QC	_HPYFYAPELLFFAKRYK_	P02768	-0.138078	0.138078	0.333271	0.130071	158	P02768	ALB	Serum albumin	ALBU_HUMAN	1	-9.1271	0.908729	Dengue	QC	NaN	NaN	NaN	32.4913	0.317936
Dengue / QC	_ESPGNVQIVNGYFVHFFAPQGLPVVPK_	Q06033;Q06033-2	0.135511	0.135511	0.138819	0.0636509	142	Q06033;Q06033-2	ITIH3	Inter-alpha-trypsin inhibitor heavy chain H3;Isoform 2 of Inter-alpha-trypsin inhibitor heavy chain H3	ITIH3_HUMAN	1	9.84818	1.09848	Dengue	QC	NaN	NaN	NaN	31.3692	0.205148
Dengue / QC	_IFFHLNAVALGDGGHYTC[Carbamidomethyl (C)]R_	P04217	-0.268412	0.268412	0.0080568	0.00563078	176	P04217	A1BG	Alpha-1B-glycoprotein	A1BG_HUMAN	1	-16.9767	0.830233	Dengue	QC	NaN	NaN	NaN	52.8672	0.112685
Dengue / QC	_TTVMVKNEDSLVFVQTDK_	P01023	-0.192927	0.192927	0.143872	0.0655358	176	P01023	A2M	Alpha-2-macroglobulin	A2MG_HUMAN	1	-12.5171	0.874829	Dengue	QC	NaN	NaN	NaN	54.187	0.209221
Dengue / QC	_KC[Carbamidomethyl (C)]C[Carbamidomethyl (C)]VEC[Carbamidomethyl (C)]PPC[Carbamidomethyl (C)]PAPPVAGPSVFLFPPKPK_	P01859	-0.352238	0.352238	0.000162932	0.000182229	176	P01859	IGHG2	Immunoglobulin heavy constant gamma 2	IGHG2_HUMAN	1	-21.6632	0.783368	Dengue	QC	NaN	NaN	NaN	83.1585	0.0784853
Dengue / QC	_LHEAFSPVSYQHDLALLR_	P00748	-0.261014	0.261014	0.0937544	0.0460355	176	P00748	F12	Coagulation factor XII	FA12_HUMAN	1	-16.5499	0.834501	Dengue	QC	NaN	NaN	NaN	39.6434	0.180508
Dengue / QC	_SSNNPHSPIVEEFQVPYNK_	P09871	-0.279603	0.279603	0.00886817	0.00611708	176	P09871	C1S	Complement C1s subcomponent	C1S_HUMAN	1	-17.6182	0.823818	Dengue	QC	NaN	NaN	NaN	45.8224	0.113309
Dengue / QC	_KPVEEYANC[Carbamidomethyl (C)]HLAR_	P02787	-0.283683	0.283683	0.00698299	0.00498107	174	P02787	TF	Serotransferrin	TRFE_HUMAN	1	-17.8509	0.821491	Dengue	QC	NaN	NaN	NaN	56.3791	0.110077
Dengue / QC	_AVLTIDEKGTEAAGAM[Oxidation (M)]FLEAIPMSIPPEVK_	P01009	0.365055	0.365055	0.502225	0.180187	148	P01009	SERPINA1	Alpha-1-antitrypsin	A1AT_HUMAN	1	28.7931	1.28793	Dengue	QC	NaN	NaN	NaN	13.6927	0.447081
Dengue / QC	_LEAC[Carbamidomethyl (C)]ESLTR_	Q04756	-0.255179	0.255179	0.0971864	0.0474301	108	Q04756	HGFAC	Hepatocyte growth factor activator	HGFA_HUMAN	1	-16.2117	0.837883	Dengue	QC	NaN	NaN	NaN	20.6655	0.177237
Dengue / QC	_FC[Carbamidomethyl (C)]GQLGSPLGNPPGKK_	B4DPQ0	-0.339534	0.339534	0.0025575	0.00207491	176	B4DPQ0	C1R	Complement C1r subcomponent	B4DPQ0_HUMAN	1	-20.9704	0.790296	Dengue	QC	NaN	NaN	NaN	47.9145	0.0966167
Dengue / QC	_SM[Oxidation (M)]GGKEDLIWELLNQAQEHFGKDK_	P02787	-0.431999	0.431999	0.132784	0.0613119	136	P02787	TF	Serotransferrin	TRFE_HUMAN	1	-25.8766	0.741234	Dengue	QC	NaN	NaN	NaN	40.6631	0.200076
Dengue / QC	_RLYGSEAFATDFQDSAAAKK_	P01011	-0.31593	0.31593	0.000127875	0.000148071	168	P01011	SERPINA3	Alpha-1-antichymotrypsin	AACT_HUMAN	1	-19.6667	0.803333	Dengue	QC	NaN	NaN	NaN	136.37	0.077727
Dengue / QC	_C[Carbamidomethyl (C)]EPLEKQHEK_	P19652	1.33243	1.33243	0.794382	0.256999	40	P19652	ORM2	Alpha-1-acid glycoprotein 2	A1AG2_HUMAN	1	151.826	2.51826	Dengue	QC	NaN	NaN	NaN	4.6348	1.11021
Dengue / QC	_QEPSQGTTTFAVTSILR_	A0A0G2JMB2	-0.33871	0.33871	0.0112208	0.00750827	176	A0A0G2JMB2	IGHA2	Immunoglobulin heavy constant alpha 2 (Fragment)	A0A0G2JMB2_HUMAN	1	-20.9252	0.790748	Dengue	QC	NaN	NaN	NaN	86.6618	0.118231
Dengue / QC	_DLLFKDSAHGFLK_	P02787	-0.310672	0.310672	0.00105304	0.000950128	174	P02787	TF	Serotransferrin	TRFE_HUMAN	1	-19.3734	0.806266	Dengue	QC	NaN	NaN	NaN	63.371	0.0890242
Dengue / QC	_GDGIPDR_	A0A075B6K6	0.0556975	0.0556975	0.206134	0.0878947	140	A0A075B6K6	IGLV4-3	Immunoglobulin lambda variable 4-3	LV403_HUMAN	1	3.93615	1.03936	Dengue	QC	NaN	NaN	NaN	51.1248	0.238728
Dengue / QC	_QYTDSTFR_	P00450	-0.279672	0.279672	0.0236725	0.0143087	176	P00450	CP	Ceruloplasmin	CERU_HUMAN	1	-17.6222	0.823778	Dengue	QC	NaN	NaN	NaN	61.3167	0.131722
Dengue / QC	_SYSC[Carbamidomethyl (C)]QVTHEGSTVEK_	P0DOY2	-0.203688	0.203688	0.0131548	0.00861067	176	P0DOY2	IGLC2	Immunoglobulin lambda constant 2	IGLC2_HUMAN	1	-13.1672	0.868328	Dengue	QC	NaN	NaN	NaN	63.1623	0.119755
Dengue / QC	_RPSEIVIGQC[Carbamidomethyl (C)]K_	P04196	-0.286063	0.286063	0.000155694	0.000175459	176	P04196	HRG	Histidine-rich glycoprotein	HRG_HUMAN	1	-17.9863	0.820137	Dengue	QC	NaN	NaN	NaN	69.9777	0.0763476
Dengue / QC	_QEPERNEC[Carbamidomethyl (C)]FLQHK_	P02768	-0.196708	0.196708	0.00360627	0.00280244	176	P02768	ALB	Serum albumin	ALBU_HUMAN	1	-12.7461	0.872539	Dengue	QC	NaN	NaN	NaN	53.4221	0.100261
Dengue / QC	_DVRDYFM[Oxidation (M)]PC[Carbamidomethyl (C)]PGR_	P02790	-0.295017	0.295017	0.0120663	0.00799252	166	P02790	HPX	Hemopexin	HEMO_HUMAN	1	-18.4937	0.815063	Dengue	QC	NaN	NaN	NaN	53.7292	0.11727
Dengue / QC	_YAVSEAAAHK_	O75636	-0.221779	0.221779	0.0196403	0.0121763	86	O75636	FCN3	Ficolin-3	FCN3_HUMAN	1	-14.2493	0.857507	Dengue	QC	NaN	NaN	NaN	42.9452	0.125614
Dengue / QC	_TLYSSSPR_	P05155;P05155-3	-0.280204	0.280204	0.00333852	0.00261943	174	P05155;P05155-3	SERPING1	Plasma protease C1 inhibitor;Isoform 3 of Plasma protease C1 inhibitor	IC1_HUMAN	1	-17.6526	0.823474	Dengue	QC	NaN	NaN	NaN	63.2526	0.0994452
Dengue / QC	_TTPPVLDSDGSFFLYSK_	P01857	-0.276825	0.276825	0.0184291	0.0115382	176	P01857	IGHG1	Immunoglobulin heavy constant gamma 1	IGHG1_HUMAN	1	-17.4594	0.825406	Dengue	QC	NaN	NaN	NaN	65.3989	0.125312
Dengue / QC	_QPFVQGLALYTPVVLPR_	P01019	-0.170778	0.170778	0.101068	0.0489806	176	P01019	AGT	Angiotensinogen	ANGT_HUMAN	1	-11.1637	0.888363	Dengue	QC	NaN	NaN	NaN	44.4439	0.179986
Dengue / QC	_SVLGQLGITK_	P01009	-0.353968	0.353968	0.0016716	0.00142954	176	P01009	SERPINA1	Alpha-1-antitrypsin	A1AT_HUMAN	1	-21.7571	0.782429	Dengue	QC	NaN	NaN	NaN	94.118	0.0930524
Dengue / QC	_VDFTLSSER_	P0C0L5	-0.306081	0.306081	1.97925e-05	2.80666e-05	174	P0C0L5	C4B	Complement C4-B	CO4B_HUMAN	1	-19.1164	0.808836	Dengue	QC	NaN	NaN	NaN	106.278	0.0673428
Dengue / QC	_WSHPPSC[Carbamidomethyl (C)]IK_	P08603	-0.0602558	0.0602558	0.0494037	0.0268569	158	P08603	CFH	Complement factor H	CFAH_HUMAN	1	-4.0906	0.959094	Dengue	QC	NaN	NaN	NaN	36.1409	0.147939
Dengue / QC	_WEMPFDPQDTHQSR_	P01011	-0.282931	0.282931	0.000242151	0.000258887	166	P01011	SERPINA3	Alpha-1-antichymotrypsin	AACT_HUMAN	1	-17.808	0.82192	Dengue	QC	NaN	NaN	NaN	76.426	0.0780334
Dengue / QC	_RHPYFYAPELLFFAK_	P02768	-0.28517	0.28517	0.00293584	0.0023439	176	P02768	ALB	Serum albumin	ALBU_HUMAN	1	-17.9355	0.820645	Dengue	QC	NaN	NaN	NaN	91.3741	0.0983314
Dengue / QC	_TPALHFK_	P04114	-0.267541	0.267541	0.0497882	0.0270178	168	P04114	APOB	Apolipoprotein B-100	APOB_HUMAN	1	-16.9266	0.830734	Dengue	QC	NaN	NaN	NaN	50.3418	0.149132
Dengue / QC	_VTTVASHTSDSDVPSGVTEVVVK_	P10909;P10909-2;P10909-4;P10909-5	-0.275767	0.275767	0.0224683	0.0136957	176	P10909;P10909-2;P10909-4;P10909-5	CLU	Clusterin;Isoform 2 of Clusterin;Isoform 4 of Clusterin;Isoform 5 of Clusterin	CLUS_HUMAN	1	-17.3989	0.826011	Dengue	QC	NaN	NaN	NaN	43.8806	0.126583
Dengue / QC	_VTISVDR_	A0A087WSY4	-0.32058	0.32058	0.00657587	0.0047322	160	A0A087WSY4	IGHV4-30-2	Immunoglobulin heavy variable 4-30-2	HV432_HUMAN	1	-19.9252	0.800748	Dengue	QC	NaN	NaN	NaN	132.804	0.108452
Dengue / QC	_FYHPEKEDGK_	P01024	-0.489507	0.489507	0.103255	0.0498187	102	P01024	C3	Complement C3	CO3_HUMAN	1	-28.7732	0.712268	Dengue	QC	NaN	NaN	NaN	27.985	0.177725
Dengue / QC	_TTPPVLDSDGSFFLYSR_	P01861	-0.337807	0.337807	0.0114746	0.00765769	176	P01861	IGHG4	Immunoglobulin heavy constant gamma 4	IGHG4_HUMAN	1	-20.8757	0.791243	Dengue	QC	NaN	NaN	NaN	101.681	0.116243
Dengue / QC	_TITKLSFVK_	P01023	-0.298943	0.298943	0.125577	0.0585282	72	P01023	A2M	Alpha-2-macroglobulin	A2MG_HUMAN	1	-18.7152	0.812848	Dengue	QC	NaN	NaN	NaN	63.6545	0.192544
Dengue / QC	_C[Carbamidomethyl (C)]VLFPYGGC[Carbamidomethyl (C)]QGNGNK_	P02760	-0.318834	0.318834	0.000357776	0.000365439	172	P02760	AMBP	Protein AMBP	AMBP_HUMAN	1	-19.8282	0.801718	Dengue	QC	NaN	NaN	NaN	63.3416	0.079147
Dengue / QC	_AFSANKYR_	O75882;O75882-2;O75882-3	-0.271054	0.271054	0.337359	0.131311	44	O75882;O75882-2;O75882-3	ATRN	Attractin;Isoform 2 of Attractin;Isoform 3 of Attractin	ATRN_HUMAN	1	-17.1286	0.828714	Dengue	QC	NaN	NaN	NaN	11.0436	0.297106
Dengue / QC	_C[Carbamidomethyl (C)]C[Carbamidomethyl (C)]VEC[Carbamidomethyl (C)]PPC[Carbamidomethyl (C)]PAPPVAGPSVFLFPPKPK_	P01859	-0.292894	0.292894	0.0881494	0.0437036	176	P01859	IGHG2	Immunoglobulin heavy constant gamma 2	IGHG2_HUMAN	1	-18.3737	0.816263	Dengue	QC	NaN	NaN	NaN	56.4233	0.171682
Dengue / QC	_LRTEGDGVYTLNDKK_	P00738	-0.239933	0.239933	0.0301924	0.0175934	174	P00738	HP	Haptoglobin	HPT_HUMAN	1	-15.3216	0.846784	Dengue	QC	NaN	NaN	NaN	65.0499	0.134286
Dengue / QC	_KC[Carbamidomethyl (C)]QSWSSMTPHR_	P00747	-0.245755	0.245755	0.0229588	0.0139415	74	P00747	PLG	Plasminogen	PLMN_HUMAN	1	-15.6626	0.843374	Dengue	QC	NaN	NaN	NaN	41.8696	0.125799
Dengue / QC	_FSPATHPSEGLEENYC[Carbamidomethyl (C)]R_	P00747	-0.254224	0.254224	0.00387197	0.00297844	164	P00747	PLG	Plasminogen	PLMN_HUMAN	1	-16.1562	0.838438	Dengue	QC	NaN	NaN	NaN	41.1417	0.0969693
Dengue / QC	_SKEFQLFSSPHGK_	P02787	-0.298474	0.298474	0.00224326	0.00185445	176	P02787	TF	Serotransferrin	TRFE_HUMAN	1	-18.6888	0.813112	Dengue	QC	NaN	NaN	NaN	68.0711	0.0933508
Dengue / QC	_WLQGSQELPR_	A0A0G2JMB2	-0.324174	0.324174	0.0516113	0.0277854	176	A0A0G2JMB2	IGHA2	Immunoglobulin heavy constant alpha 2 (Fragment)	A0A0G2JMB2_HUMAN	1	-20.1245	0.798755	Dengue	QC	NaN	NaN	NaN	75.2426	0.149902
Dengue / QC	_LKWTNQQK_	P36980;P36980-2	-0.315071	0.315071	0.195732	0.0841621	38	P36980;P36980-2	CFHR2	Complement factor H-related protein 2;Isoform Short of Complement factor H-related protein 2	FHR2_HUMAN	1	-19.6189	0.803811	Dengue	QC	NaN	NaN	NaN	8.27283	0.210468
Dengue / QC	_LSQRFPK_	P02768	-0.276728	0.276728	0.0259615	0.0154638	176	P02768	ALB	Serum albumin	ALBU_HUMAN	1	-17.4539	0.825461	Dengue	QC	NaN	NaN	NaN	61.7024	0.12973
Dengue / QC	_VDVQAGAC[Carbamidomethyl (C)]EGK_	P0C0L5	-0.187788	0.187788	0.0224602	0.0136935	154	P0C0L5	C4B	Complement C4-B	CO4B_HUMAN	1	-12.2049	0.877951	Dengue	QC	NaN	NaN	NaN	65.7569	0.126554
Dengue / QC	_YYTYLIMNK_	P01024	-0.303047	0.303047	6.62379e-05	8.24579e-05	174	P01024	C3	Complement C3	CO3_HUMAN	1	-18.9461	0.810539	Dengue	QC	NaN	NaN	NaN	101.628	0.071023
Dengue / QC	_DVMQGTDEHVVC[Carbamidomethyl (C)]K_	P01871	-0.272094	0.272094	0.000782211	0.000730435	150	P01871	IGHM	Immunoglobulin heavy constant mu	IGHM_HUMAN	1	-17.1883	0.828117	Dengue	QC	NaN	NaN	NaN	78.1942	0.084542
Dengue / QC	_TTLSGAPC[Carbamidomethyl (C)]QPWASEATYR_	P00748	-0.309645	0.309645	0.000932915	0.000852807	172	P00748	F12	Coagulation factor XII	FA12_HUMAN	1	-19.316	0.80684	Dengue	QC	NaN	NaN	NaN	64.2896	0.0851454
Dengue / QC	_KQINDYVEKGTQGK_	P01009	-0.225698	0.225698	0.00858156	0.00594782	80	P01009	SERPINA1	Alpha-1-antitrypsin	A1AT_HUMAN	1	-14.4819	0.855181	Dengue	QC	NaN	NaN	NaN	43.466	0.107222
Dengue / QC	_VM[Oxidation (M)]PIC[Carbamidomethyl (C)]LPSKDYAEVGR_	P00738	-0.448489	0.448489	0.152511	0.0686846	172	P00738	HP	Haptoglobin	HPT_HUMAN	1	-26.719	0.73281	Dengue	QC	NaN	NaN	NaN	47.716	0.202815
Dengue / QC	_QIGSVYRLPPLRK_	P04196	-0.330188	0.330188	0.00730961	0.00517185	116	P04196	HRG	Histidine-rich glycoprotein	HRG_HUMAN	1	-20.4567	0.795433	Dengue	QC	NaN	NaN	NaN	44.2591	0.104726
Dengue / QC	_VQEAHLTEDQIFYFPK_	P07360	-0.311171	0.311171	0.0248946	0.0149409	166	P07360	C8G	Complement component C8 gamma chain	CO8G_HUMAN	1	-19.4013	0.805987	Dengue	QC	NaN	NaN	NaN	46.5414	0.126989
Dengue / QC	_SPPGVC[Carbamidomethyl (C)]SRDPTPEQTHR_	P08697	-0.174233	0.174233	0.220522	0.0928836	56	P08697	SERPINF2	Alpha-2-antiplasmin	A2AP_HUMAN	1	-11.3762	0.886238	Dengue	QC	NaN	NaN	NaN	11.17	0.226638
Dengue / QC	_VVC[Carbamidomethyl (C)]SC[Carbamidomethyl (C)]TEGYR_	P00740	-0.309104	0.309104	0.0233742	0.0141629	116	P00740	F9	Coagulation factor IX	FA9_HUMAN	1	-19.2857	0.807143	Dengue	QC	NaN	NaN	NaN	34.1623	0.123843
Dengue / QC	_ISLPESLKR_	P01024	-0.371123	0.371123	0.0378782	0.0214101	176	P01024	C3	Complement C3	CO3_HUMAN	1	-22.6819	0.773181	Dengue	QC	NaN	NaN	NaN	42.3512	0.137092
Dengue / QC	_KAEEEHLGILGPQLHADVGDKVK_	P00450	-0.292675	0.292675	0.000721103	0.000679197	176	P00450	CP	Ceruloplasmin	CERU_HUMAN	1	-18.3613	0.816387	Dengue	QC	NaN	NaN	NaN	83.6589	0.0834238
Dengue / QC	_ANRPFLVFIR_	P01008	-0.313707	0.313707	0.000239377	0.000256205	170	P01008	SERPINC1	Antithrombin-III	ANT3_HUMAN	1	-19.5428	0.804572	Dengue	QC	NaN	NaN	NaN	83.5809	0.076061
Dengue / QC	_GDTFSC[Carbamidomethyl (C)]MVGHEALPLAFTQK_	A0A0G2JMB2	-0.0796364	0.0796364	0.0528238	0.0283291	174	A0A0G2JMB2	IGHA2	Immunoglobulin heavy constant alpha 2 (Fragment)	A0A0G2JMB2_HUMAN	1	-5.37039	0.946296	Dengue	QC	NaN	NaN	NaN	64.5869	0.147897
Dengue / QC	_DSGFQM[Oxidation (M)]NQLR_	P02787	-0.294524	0.294524	0.00235556	0.00193145	176	P02787	TF	Serotransferrin	TRFE_HUMAN	1	-18.4659	0.815341	Dengue	QC	NaN	NaN	NaN	52.7345	0.0912362
Dengue / QC	_LHQPVVLTDHVVPLC[Carbamidomethyl (C)]LPER_	F5H8B0;P08709;P08709-2	-0.735569	0.735569	0.59925	0.207245	34	F5H8B0;P08709;P08709-2	F7	Coagulation factor VII;Coagulation factor VII;Isoform B of Coagulation factor VII	F5H8B0_HUMAN;FA7_HUMAN;FA7_HUMAN	1	-39.9419	0.600581	Dengue	QC	NaN	NaN	NaN	3.69644	0.507815
Dengue / QC	_SLNEEAVKK_	P01023	-0.157201	0.157201	0.0489572	0.0266389	166	P01023	A2M	Alpha-2-macroglobulin	A2MG_HUMAN	1	-10.3237	0.896763	Dengue	QC	NaN	NaN	NaN	64.5997	0.145157
Dengue / QC	_LAVYQAGAR_	P02649	-0.275382	0.275382	0.0448558	0.0247602	176	P02649	APOE	Apolipoprotein E	APOE_HUMAN	1	-17.3768	0.826232	Dengue	QC	NaN	NaN	NaN	46.8539	0.141055
Dengue / QC	_MC[Carbamidomethyl (C)]PQLQQYEM[Oxidation (M)]HGPEGLR_	P01023	-0.221411	0.221411	0.0465152	0.0255078	176	P01023	A2M	Alpha-2-macroglobulin	A2MG_HUMAN	1	-14.2274	0.857726	Dengue	QC	NaN	NaN	NaN	91.3777	0.144037
Dengue / QC	_YIC[Carbamidomethyl (C)]ENQDSISSK_	P02768	-0.328975	0.328975	0.186166	0.0808103	176	P02768	ALB	Serum albumin	ALBU_HUMAN	1	-20.3898	0.796102	Dengue	QC	NaN	NaN	NaN	57.6877	0.216713
Dengue / QC	_VTITC[Carbamidomethyl (C)]QASQDISNYLNWYQQKPGKAPK_	P01593;P01594	-0.265106	0.265106	0.143614	0.0654494	126	P01593;P01594	IGKV1D-33;IGKV1-33	Immunoglobulin kappa variable 1D-33;Immunoglobulin kappa variable 1-33	KVD33_HUMAN;KV133_HUMAN	1	-16.7862	0.832138	Dengue	QC	NaN	NaN	NaN	55.6225	0.195102
Dengue / QC	_ANPTVTLFPPSSEELQANK_	A0A0B4J231;B9A064	-0.40289	0.40289	0.0013102	0.00115287	176	A0A0B4J231;B9A064	IGLL5	Immunoglobulin lambda-like polypeptide 5	A0A0B4J231_HUMAN;IGLL5_HUMAN	1	-24.3658	0.756342	Dengue	QC	NaN	NaN	NaN	104.384	0.087394
Dengue / QC	_NALWHTGNTPGQVR_	P07996	-0.394691	0.394691	0.0729812	0.0371917	146	P07996	THBS1	Thrombospondin-1	TSP1_HUMAN	1	-23.9348	0.760652	Dengue	QC	NaN	NaN	NaN	46.6333	0.157269
Dengue / QC	_HLEDVFSKR_	Q96KN2	-0.227133	0.227133	0.270667	0.110246	18	Q96KN2	CNDP1	Beta-Ala-His dipeptidase	CNDP1_HUMAN	1	-14.5669	0.854331	Dengue	QC	NaN	NaN	NaN	10.778	0.247404
Dengue / QC	_KAMAVEDIISR_	P07357	-0.156052	0.156052	0.000485232	0.000477047	176	P07357	C8A	Complement component C8 alpha chain	CO8A_HUMAN	1	-10.2522	0.897478	Dengue	QC	NaN	NaN	NaN	51.7724	0.0771002
Dengue / QC	_KGYTQQLAFRQPSSAFAAFVK_	P01024	-0.246095	0.246095	0.00411693	0.00314382	154	P01024	C3	Complement C3	CO3_HUMAN	1	-15.6825	0.843175	Dengue	QC	NaN	NaN	NaN	49.4042	0.0953524
Dengue / QC	_DISEVVTPR_	B4E1Z4	-0.259809	0.259809	0.000158065	0.000177474	176	B4E1Z4	NaN	cDNA FLJ55673, highly similar to Complement factor B (EC 3.4.21.47)	B4E1Z4_HUMAN	1	-16.4801	0.835199	Dengue	QC	NaN	NaN	NaN	49.3095	0.070108
Dengue / QC	_VIVIPVGIGPHANLK_	P04275	-0.348139	0.348139	0.0262336	0.0155969	122	P04275	VWF	von Willebrand factor	VWF_HUMAN	1	-21.4403	0.785597	Dengue	QC	NaN	NaN	NaN	71.1468	0.126149
Dengue / QC	_DLC[Carbamidomethyl (C)]GC[Carbamidomethyl (C)]YSVSSVLPGC[Carbamidomethyl (C)]AEPWNHGK_	P01876	-0.291504	0.291504	0.0109591	0.00735619	176	P01876	IGHA1	Immunoglobulin heavy constant alpha 1	IGHA1_HUMAN	1	-18.295	0.81705	Dengue	QC	NaN	NaN	NaN	104.9	0.11054
Dengue / QC	_SRVTMSVDTSKNQFSLK_	A0A0C4DH34	-0.107591	0.107591	0.0375702	0.0212613	80	A0A0C4DH34	IGHV4-28	Immunoglobulin heavy variable 4-28	HV428_HUMAN	1	-7.18635	0.928136	Dengue	QC	NaN	NaN	NaN	54.0635	0.134161
Dengue / QC	_DHAVDLIQK_	P0C0L5	-0.261452	0.261452	0.00102616	0.000928634	158	P0C0L5	C4B	Complement C4-B	CO4B_HUMAN	1	-16.5752	0.834248	Dengue	QC	NaN	NaN	NaN	141.526	0.0852912
Dengue / QC	_SHC[Carbamidomethyl (C)]IAEVENDEM[Oxidation (M)]PADLPSLAADFVESK_	P02768	-0.162297	0.162297	0.107127	0.0513563	176	P02768	ALB	Serum albumin	ALBU_HUMAN	1	-10.6399	0.893601	Dengue	QC	NaN	NaN	NaN	46.3665	0.173737
Dengue / QC	_GPSVFPLAPSSKSTSGGTAALGC[Carbamidomethyl (C)]LVK_	P01857	-0.260279	0.260279	0.0165649	0.0104906	170	P01857	IGHG1	Immunoglobulin heavy constant gamma 1	IGHG1_HUMAN	1	-16.5074	0.834926	Dengue	QC	NaN	NaN	NaN	67.1251	0.115834
Dengue / QC	_FQSVFTVTR_	P02747	-0.289436	0.289436	6.71306e-05	8.34792e-05	176	P02747	C1QC	Complement C1q subcomponent subunit C	C1QC_HUMAN	1	-18.1778	0.818222	Dengue	QC	NaN	NaN	NaN	52.2154	0.0656832
Dengue / QC	_VVSVLTVVHQDWLNGKEYK_	P01859	-0.358745	0.358745	0.100141	0.0486131	176	P01859	IGHG2	Immunoglobulin heavy constant gamma 2	IGHG2_HUMAN	1	-22.0158	0.779842	Dengue	QC	NaN	NaN	NaN	49.9544	0.169626
Dengue / QC	_SDGSHSKGDGIPDR_	A0A075B6K6	-0.430292	0.430292	0.219838	0.0926564	10	A0A075B6K6	IGLV4-3	Immunoglobulin lambda variable 4-3	LV403_HUMAN	1	-25.7888	0.742112	Dengue	QC	NaN	NaN	NaN	4.5314	0.199706
Dengue / QC	_VPMMNSK_	P05155;P05155-3	-0.369256	0.369256	0.0107985	0.0072645	166	P05155;P05155-3	SERPING1	Plasma protease C1 inhibitor;Isoform 3 of Plasma protease C1 inhibitor	IC1_HUMAN	1	-22.5819	0.774181	Dengue	QC	NaN	NaN	NaN	68.9925	0.108386
Dengue / QC	_DSTYSLSSTLTLSK_	P01834	-0.192185	0.192185	0.0577979	0.0305593	174	P01834	IGKC	Immunoglobulin kappa constant	IGKC_HUMAN	1	-12.4721	0.875279	Dengue	QC	NaN	NaN	NaN	59.5793	0.146733
Dengue / QC	_NGQVEIK_	P04003	-0.298001	0.298001	0.125537	0.0585189	88	P04003	C4BPA	C4b-binding protein alpha chain	C4BPA_HUMAN	1	-18.6621	0.813379	Dengue	QC	NaN	NaN	NaN	26.0108	0.17928
Dengue / QC	_LADGGATNQGR_	Q08380	-0.0869654	0.0869654	0.176174	0.0772788	134	Q08380	LGALS3BP	Galectin-3-binding protein	LG3BP_HUMAN	1	-5.8499	0.941501	Dengue	QC	NaN	NaN	NaN	61.0377	0.207278
Dengue / QC	_LIQEAPKPEC[Carbamidomethyl (C)]EK_	P20851;P20851-2	-0.0753933	0.0753933	0.0119555	0.0079273	158	P20851;P20851-2	C4BPB	C4b-binding protein beta chain;Isoform 2 of C4b-binding protein beta chain	C4BPB_HUMAN	1	-5.09167	0.949083	Dengue	QC	NaN	NaN	NaN	34.8193	0.106944
Dengue / QC	_GLEWVANIKQDGSEK_	P01780	-0.130566	0.130566	0.192535	0.0830167	42	P01780	IGHV3-7	Immunoglobulin heavy variable 3-7	HV307_HUMAN	1	-8.6527	0.913473	Dengue	QC	NaN	NaN	NaN	25.3573	0.210954
Dengue / QC	_GSFPWQAK_	P00738	-0.225729	0.225729	0.00149158	0.00129322	176	P00738	HP	Haptoglobin	HPT_HUMAN	1	-14.4837	0.855163	Dengue	QC	NaN	NaN	NaN	66.9652	0.0850682
Dengue / QC	_ATLGPAVRPLPWQR_	K7ERG9;P00746	-0.247808	0.247808	0.0357136	0.0203564	140	K7ERG9;P00746	CFD	Complement factor D	K7ERG9_HUMAN;CFAD_HUMAN	1	-15.7825	0.842175	Dengue	QC	NaN	NaN	NaN	121.402	0.132594
Dengue / QC	_STGKPTLYNVSLVM[Oxidation (M)]SDTAGTC[Carbamidomethyl (C)]Y_	P01871	-0.459788	0.459788	0.154994	0.0695531	24	P01871	IGHM	Immunoglobulin heavy constant mu	IGHM_HUMAN	1	-27.2907	0.727093	Dengue	QC	NaN	NaN	NaN	8.81542	0.18104
Dengue / QC	_FKDLGEENFK_	P02768	-0.309711	0.309711	0.000736218	0.000691515	176	P02768	ALB	Serum albumin	ALBU_HUMAN	1	-19.3196	0.806804	Dengue	QC	NaN	NaN	NaN	66.3559	0.0794689
Dengue / QC	_VSNRDSGVPDRFSGSGSGTDFTLK_	P06310	-0.257828	0.257828	0.0500685	0.0271344	172	P06310	IGKV2-30	Immunoglobulin kappa variable 2-30	KV230_HUMAN	1	-16.3654	0.836346	Dengue	QC	NaN	NaN	NaN	69.924	0.140951
Dengue / QC	_HITSLEVIK_	P10720	-0.274669	0.274669	0.00497976	0.00371374	148	P10720	PF4V1	Platelet factor 4 variant	PF4V_HUMAN	1	-17.336	0.82664	Dengue	QC	NaN	NaN	NaN	119.728	0.0981881
Dengue / QC	_GQGTLSVVTMYHAK_	P01024	-0.317578	0.317578	4.1095e-06	6.8157e-06	176	P01024	C3	Complement C3	CO3_HUMAN	1	-19.7584	0.802416	Dengue	QC	NaN	NaN	NaN	73.5	0.0563791
Dengue / QC	_EVGPTNADPVC[Carbamidomethyl (C)]LAK_	P00450	-0.302897	0.302897	0.000706182	0.000666994	176	P00450	CP	Ceruloplasmin	CERU_HUMAN	1	-18.9377	0.810623	Dengue	QC	NaN	NaN	NaN	44.8658	0.0770974
Dengue / QC	_VTISC[Carbamidomethyl (C)]TGSSSNIGAGYDVHWYQQLPGTAPK_	P01703	-0.293162	0.293162	0.12779	0.0593393	158	P01703	IGLV1-40	Immunoglobulin lambda variable 1-40	LV140_HUMAN	1	-18.3889	0.816111	Dengue	QC	NaN	NaN	NaN	47.2784	0.180683
Dengue / QC	_LSEKHEGSFIQGAEK_	P13671	-0.139702	0.139702	0.018071	0.0113324	150	P13671	C6	Complement component C6	CO6_HUMAN	1	-9.22935	0.907706	Dengue	QC	NaN	NaN	NaN	78.0207	0.115877
Dengue / QC	_ALDFAVGEYNK_	P01034	-0.310419	0.310419	0.109471	0.0522885	168	P01034	CST3	Cystatin-C	CYTC_HUMAN	1	-19.3593	0.806407	Dengue	QC	NaN	NaN	NaN	39.5385	0.170525
Dengue / QC	_GLEWVGFIR_	A0A0A0MS15	-0.310185	0.310185	0.0450637	0.0248535	174	A0A0A0MS15	IGHV3-49	Immunoglobulin heavy variable 3-49	HV349_HUMAN	1	-19.3461	0.806539	Dengue	QC	NaN	NaN	NaN	50.2753	0.135735
Dengue / QC	_IVLVDNK_	P01591	-0.206142	0.206142	0.030444	0.0177207	174	P01591	JCHAIN	Immunoglobulin J chain	IGJ_HUMAN	1	-13.3148	0.866852	Dengue	QC	NaN	NaN	NaN	58.9265	0.125658
Dengue / QC	_FYHPEKEDGKLNK_	P01024	-0.0312825	0.0312825	0.0214342	0.0131388	176	P01024	C3	Complement C3	CO3_HUMAN	1	-2.145	0.97855	Dengue	QC	NaN	NaN	NaN	49.9204	0.117254
Dengue / QC	_TYNVLDMK_	P0C0L5	-0.322733	0.322733	0.000912207	0.00083706	160	P0C0L5	C4B	Complement C4-B	CO4B_HUMAN	1	-20.0446	0.799554	Dengue	QC	NaN	NaN	NaN	74.8589	0.0804621
Dengue / QC	_IYWYQQKPGSPPQYLLR_	A0A087WSX0	-0.292045	0.292045	0.0106326	0.00716725	126	A0A087WSX0	IGLV5-45	Immunoglobulin lambda variable 5-45	LV545_HUMAN	1	-18.3257	0.816743	Dengue	QC	NaN	NaN	NaN	104.376	0.106824
Dengue / QC	_DSAHGFLKVPPR_	P02787	-0.232147	0.232147	0.184177	0.0801315	174	P02787	TF	Serotransferrin	TRFE_HUMAN	1	-14.8633	0.851367	Dengue	QC	NaN	NaN	NaN	48.0544	0.206239
Dengue / QC	_QALEEFQK_	P07358	-0.500203	0.500203	0.239816	0.0995709	78	P07358	C8B	Complement component C8 beta chain	CO8B_HUMAN	1	-29.2993	0.707007	Dengue	QC	NaN	NaN	NaN	11.8585	0.224534
Dengue / QC	_EQHLFLPFSYK_	P04114	-0.361584	0.361584	0.0221598	0.0135347	176	P04114	APOB	Apolipoprotein B-100	APOB_HUMAN	1	-22.1691	0.778309	Dengue	QC	NaN	NaN	NaN	48.0143	0.1175
Dengue / QC	_ILGPLSYSK_	P51884	-0.280594	0.280594	0.0310004	0.0180042	154	P51884	LUM	Lumican	LUM_HUMAN	1	-17.6748	0.823252	Dengue	QC	NaN	NaN	NaN	45.912	0.124761
Dengue / QC	_LQHLENELTHDIITK_	P01009	-0.214013	0.214013	0.00261451	0.00211433	172	P01009	SERPINA1	Alpha-1-antitrypsin	A1AT_HUMAN	1	-13.7864	0.862136	Dengue	QC	NaN	NaN	NaN	69.3062	0.0889067
Dengue / QC	_QIQVSWLR_	P01871	-0.307359	0.307359	0.00252557	0.0020545	176	P01871	IGHM	Immunoglobulin heavy constant mu	IGHM_HUMAN	1	-19.188	0.80812	Dengue	QC	NaN	NaN	NaN	98.4861	0.089493
Dengue / QC	_YIYGKPVQGVAYVR_	P0C0L5	-0.33112	0.33112	2.67405e-05	3.68505e-05	176	P0C0L5	C4B	Complement C4-B	CO4B_HUMAN	1	-20.5081	0.794919	Dengue	QC	NaN	NaN	NaN	108.256	0.0631318
Dengue / QC	_KYLYEIARR_	P02768	-0.218911	0.218911	0.0443677	0.0245377	132	P02768	ALB	Serum albumin	ALBU_HUMAN	1	-14.0786	0.859214	Dengue	QC	NaN	NaN	NaN	39.8962	0.13326
Dengue / QC	_YYAGGC[Carbamidomethyl (C)]SPHYILNTR_	P07358	-0.285237	0.285237	0.00357103	0.00277694	174	P07358	C8B	Complement component C8 beta chain	CO8B_HUMAN	1	-17.9393	0.820607	Dengue	QC	NaN	NaN	NaN	56.6275	0.0906998
Dengue / QC	_VLLFSQSR_	Q03468	-0.0836074	0.0836074	0.409283	0.153179	152	Q03468	ERCC6	DNA excision repair protein ERCC-6	ERCC6_HUMAN	1	-5.6305	0.943695	Dengue	QC	NaN	NaN	NaN	28.3121	0.328182
Dengue / QC	_IHSGSFQSQVELSNDQEK_	P04114	-0.246463	0.246463	0.0782679	0.0394898	174	P04114	APOB	Apolipoprotein B-100	APOB_HUMAN	1	-15.704	0.84296	Dengue	QC	NaN	NaN	NaN	52.5507	0.152941
Dengue / QC	_FRPDGLPK_	A0A096LPE2	-0.258696	0.258696	0.0577881	0.0305571	166	A0A096LPE2	SAA2-SAA4	SAA2-SAA4 readthrough	A0A096LPE2_HUMAN	1	-16.4157	0.835843	Dengue	QC	NaN	NaN	NaN	46.9574	0.141155
Dengue / QC	_AEFAEVSK_	P02768	-0.230874	0.230874	3.81626e-05	5.04348e-05	176	P02768	ALB	Serum albumin	ALBU_HUMAN	1	-14.7882	0.852118	Dengue	QC	NaN	NaN	NaN	69.5015	0.0623636
Dengue / QC	_SGFSFGFK_	P07358	-0.275147	0.275147	0.000296736	0.000309559	164	P07358	C8B	Complement component C8 beta chain	CO8B_HUMAN	1	-17.3634	0.826366	Dengue	QC	NaN	NaN	NaN	90.865	0.0727036
Dengue / QC	_LVRPEVDVMC[Carbamidomethyl (C)]TAFHDNEETFLK_	P02768	-0.306337	0.306337	0.00158573	0.00136541	176	P02768	ALB	Serum albumin	ALBU_HUMAN	1	-19.1308	0.808692	Dengue	QC	NaN	NaN	NaN	73.1136	0.083234
Dengue / QC	_WYVDGVEVHNAK_	P01860	-0.21112	0.21112	0.0856682	0.0426309	176	P01860	IGHG3	Immunoglobulin heavy constant gamma 3	IGHG3_HUMAN	1	-13.6134	0.863866	Dengue	QC	NaN	NaN	NaN	46.0426	0.155322
Dengue / QC	_MESLGITSR_	P07357	-0.26039	0.26039	2.76787e-05	3.80162e-05	176	P07357	C8A	Complement component C8 alpha chain	CO8A_HUMAN	1	-16.5138	0.834862	Dengue	QC	NaN	NaN	NaN	64.0005	0.0603112
Dengue / QC	_LVGGLHR_	O43866	-0.126143	0.126143	0.380508	0.144528	78	O43866	CD5L	CD5 antigen-like	CD5L_HUMAN	1	-8.3722	0.916278	Dengue	QC	NaN	NaN	NaN	15.8724	0.30107
Dengue / QC	_VGTGGIVGSKGDGIPDRFSVLGSGLNR_	A0A0B4J1Y8	-0.354674	0.354674	0.302862	0.120654	58	A0A0B4J1Y8	IGLV9-49	Immunoglobulin lambda variable 9-49	LV949_HUMAN	1	-21.7954	0.782046	Dengue	QC	NaN	NaN	NaN	25.9748	0.258147
Dengue / QC	_EATLQDC[Carbamidomethyl (C)]PSGPWGK_	O43866	-0.235506	0.235506	0.00761455	0.00535739	176	O43866	CD5L	CD5 antigen-like	CD5L_HUMAN	1	-15.0613	0.849387	Dengue	QC	NaN	NaN	NaN	77.1416	0.0987824
Dengue / QC	_KGVC[Carbamidomethyl (C)]EETSGAYEKTDTDGK_	P02760	0.127598	0.127598	0.0855958	0.0426096	120	P02760	AMBP	Protein AMBP	AMBP_HUMAN	1	9.24736	1.09247	Dengue	QC	NaN	NaN	NaN	35.0264	0.152789
Dengue / QC	_KSRPANHC[Carbamidomethyl (C)]VYFYGDEISFSC[Carbamidomethyl (C)]HETSR_	P04003	-0.18768	0.18768	0.0110306	0.00739729	134	P04003	C4BPA	C4b-binding protein alpha chain	C4BPA_HUMAN	1	-12.1983	0.878017	Dengue	QC	NaN	NaN	NaN	47.2337	0.102143
Dengue / QC	_DIASGLIGPLIIC[Carbamidomethyl (C)]KK_	P00450	0.00844704	0.00844704	0.0275066	0.0162366	176	P00450	CP	Ceruloplasmin	CERU_HUMAN	1	0.587222	1.00587	Dengue	QC	NaN	NaN	NaN	47.8829	0.118528
Dengue / QC	_MGLAFESTK_	P04114	-0.280132	0.280132	0.0229767	0.0139509	174	P04114	APOB	Apolipoprotein B-100	APOB_HUMAN	1	-17.6485	0.823515	Dengue	QC	NaN	NaN	NaN	44.7388	0.114413
Dengue / QC	_IWDVVEK_	P01024	-0.269593	0.269593	1.38153e-05	2.03301e-05	176	P01024	C3	Complement C3	CO3_HUMAN	1	-17.0446	0.829554	Dengue	QC	NaN	NaN	NaN	59.2106	0.0567724
Dengue / QC	_INHC[Carbamidomethyl (C)]RFDEFFSEGC[Carbamidomethyl (C)]APGSKK_	P02787	-0.236692	0.236692	0.00185518	0.00156818	174	P02787	TF	Serotransferrin	TRFE_HUMAN	1	-15.1311	0.848689	Dengue	QC	NaN	NaN	NaN	58.2149	0.0824914
Dengue / QC	_GQPREPQVYTLPPSREEMTK_	P01860	-0.233344	0.233344	0.00637224	0.00460577	176	P01860	IGHG3	Immunoglobulin heavy constant gamma 3	IGHG3_HUMAN	1	-14.9339	0.850661	Dengue	QC	NaN	NaN	NaN	65.8051	0.0951797
Dengue / QC	_WRDSLEFR_	P01011	-0.266503	0.266503	0.00099428	0.000903037	176	P01011	SERPINA3	Alpha-1-antichymotrypsin	AACT_HUMAN	1	-16.8668	0.831332	Dengue	QC	NaN	NaN	NaN	122.042	0.0794332
Dengue / QC	_NQGNTWLTAFVLK_	P01023	-0.284081	0.284081	0.0339108	0.0194808	154	P01023	A2M	Alpha-2-macroglobulin	A2MG_HUMAN	1	-17.8735	0.821265	Dengue	QC	NaN	NaN	NaN	81.119	0.124177
Dengue / QC	_FGLLDEDGKK_	P0C0L5	-0.270261	0.270261	0.000154038	0.000173988	174	P0C0L5	C4B	Complement C4-B	CO4B_HUMAN	1	-17.0831	0.829169	Dengue	QC	NaN	NaN	NaN	114.413	0.0684363
Dengue / QC	_SLNEEAVK_	P01023	-0.174349	0.174349	0.0257499	0.0153584	172	P01023	A2M	Alpha-2-macroglobulin	A2MG_HUMAN	1	-11.3833	0.886167	Dengue	QC	NaN	NaN	NaN	62.5795	0.117181
Dengue / QC	_LINDYVK_	P01011	-0.323062	0.323062	0.00838351	0.00583157	140	P01011	SERPINA3	Alpha-1-antichymotrypsin	AACT_HUMAN	1	-20.0628	0.799372	Dengue	QC	NaN	NaN	NaN	85.7111	0.0989528
Dengue / QC	_VTMTTDTSTSTAYMELR_	A0A0C4DH31	-0.326528	0.326528	0.0977234	0.0476518	172	A0A0C4DH31	IGHV1-18	Immunoglobulin heavy variable 1-18	HV118_HUMAN	1	-20.2546	0.797454	Dengue	QC	NaN	NaN	NaN	156.208	0.160167
Dengue / QC	_QNC[Carbamidomethyl (C)]ELFEQLGEYK_	P02768	-0.346316	0.346316	0.0551147	0.0293721	176	P02768	ALB	Serum albumin	ALBU_HUMAN	1	-21.341	0.78659	Dengue	QC	NaN	NaN	NaN	46.0119	0.135461
Dengue / QC	_RPC[Carbamidomethyl (C)]FSALEVDETYVPK_	P02768	-0.221203	0.221203	0.0507844	0.0274215	176	P02768	ALB	Serum albumin	ALBU_HUMAN	1	-14.215	0.85785	Dengue	QC	NaN	NaN	NaN	43.497	0.132603
Dengue / QC	_GTSHEAGIVC[Carbamidomethyl (C)]R_	P11597;P11597-2	0.0451356	0.0451356	0.489004	0.176193	26	P11597;P11597-2	CETP	Cholesteryl ester transfer protein;Isoform 2 of Cholesteryl ester transfer protein	CETP_HUMAN	1	3.17801	1.03178	Dengue	QC	NaN	NaN	NaN	11.3887	0.372325
Dengue / QC	_IASFSQNC[Carbamidomethyl (C)]DIYPGK_	P01042	-0.391397	0.391397	0.00703384	0.005013	176	P01042	KNG1	Kininogen-1	KNG1_HUMAN	1	-23.7609	0.762391	Dengue	QC	NaN	NaN	NaN	51.2069	0.0947485
Dengue / QC	_KGEWVALNPLRK_	P08603	-0.227222	0.227222	0.0562182	0.0298444	176	P08603	CFH	Complement factor H	CFAH_HUMAN	1	-14.5722	0.854278	Dengue	QC	NaN	NaN	NaN	40.3244	0.135194
Dengue / QC	_LGNQEPGGQTALK_	P08697	-0.245276	0.245276	0.000919796	0.000842684	172	P08697	SERPINF2	Alpha-2-antiplasmin	A2AP_HUMAN	1	-15.6346	0.843654	Dengue	QC	NaN	NaN	NaN	71.0412	0.0764668
Dengue / QC	_GLC[Carbamidomethyl (C)]VATPVQLR_	P0C0L5	-0.305812	0.305812	0.00133829	0.00117551	170	P0C0L5	C4B	Complement C4-B	CO4B_HUMAN	1	-19.1013	0.808987	Dengue	QC	NaN	NaN	NaN	90.4854	0.0797711
Dengue / QC	_LVHVEEPHTETVR_	P01023	-0.233434	0.233434	0.0987728	0.0480732	162	P01023	A2M	Alpha-2-macroglobulin	A2MG_HUMAN	1	-14.9392	0.850608	Dengue	QC	NaN	NaN	NaN	38.5502	0.156012
Dengue / QC	_FDEFFSEGC[Carbamidomethyl (C)]APGSK_	P02787	-0.239996	0.239996	0.00945409	0.00646788	176	P02787	TF	Serotransferrin	TRFE_HUMAN	1	-15.3252	0.846748	Dengue	QC	NaN	NaN	NaN	71.8841	0.0988987
Dengue / QC	_ESEQGVYTC[Carbamidomethyl (C)]TAQGIWK_	B4DPQ0	-0.274426	0.274426	0.0312882	0.0181568	176	B4DPQ0	C1R	Complement C1r subcomponent	B4DPQ0_HUMAN	1	-17.3221	0.826779	Dengue	QC	NaN	NaN	NaN	43.4239	0.118232
Dengue / QC	_QINDYVEK_	P01009	-0.245405	0.245405	0.10959	0.0523323	172	P01009	SERPINA1	Alpha-1-antitrypsin	A1AT_HUMAN	1	-15.6421	0.843579	Dengue	QC	NaN	NaN	NaN	53.596	0.161688
Dengue / QC	_YTTTMGVNTYK_	B4DPQ0	-0.272135	0.272135	0.0187467	0.0117027	174	B4DPQ0	C1R	Complement C1r subcomponent	B4DPQ0_HUMAN	1	-17.1907	0.828093	Dengue	QC	NaN	NaN	NaN	51.9071	0.108361
Dengue / QC	_LSNENHGIAQR_	P19823	-0.0566808	0.0566808	0.0498624	0.0270527	176	P19823	ITIH2	Inter-alpha-trypsin inhibitor heavy chain H2	ITIH2_HUMAN	1	-3.85264	0.961474	Dengue	QC	NaN	NaN	NaN	51.147	0.130723
Dengue / QC	_SDENEQHLGVK_	P48740	0.0507286	0.0507286	0.503029	0.18039	8	P48740	MASP1	Mannan-binding lectin serine protease 1	MASP1_HUMAN	1	3.57879	1.03579	Dengue	QC	NaN	NaN	NaN	2.94036	0.34472
Dengue / QC	_VNEPSILEMSR_	O14791;O14791-2	-0.250883	0.250883	3.4868e-05	4.66038e-05	174	O14791;O14791-2	APOL1	Apolipoprotein L1;Isoform 2 of Apolipoprotein L1	APOL1_HUMAN	1	-15.9618	0.840382	Dengue	QC	NaN	NaN	NaN	86.867	0.0599674
Dengue / QC	_QKPDGVFQEDAPVIHQEMIGGLR_	P01024	-0.302812	0.302812	0.0419344	0.0234006	176	P01024	C3	Complement C3	CO3_HUMAN	1	-18.9329	0.810671	Dengue	QC	NaN	NaN	NaN	52.1042	0.125495
Dengue / QC	_GVC[Carbamidomethyl (C)]EETSGAYEK_	P02760	-0.365999	0.365999	0.0383528	0.0216392	150	P02760	AMBP	Protein AMBP	AMBP_HUMAN	1	-22.4069	0.775931	Dengue	QC	NaN	NaN	NaN	118.603	0.12492
Dengue / QC	_DGSPDVTTADIGANTPDATK_	Q96PD5	-0.251037	0.251037	0.00429635	0.00326055	150	Q96PD5	PGLYRP2	N-acetylmuramoyl-L-alanine amidase	PGRP2_HUMAN	1	-15.9708	0.840292	Dengue	QC	NaN	NaN	NaN	64.2604	0.0882929
Dengue / QC	_FIC[Carbamidomethyl (C)]PLTGLWPINTLK_	P02749	-0.00738551	0.00738551	0.111891	0.0532418	166	P02749	APOH	Beta-2-glycoprotein 1	APOH_HUMAN	1	-0.510616	0.994894	Dengue	QC	NaN	NaN	NaN	51.1954	0.161595
Dengue / QC	_FSVLGSGLNR_	A0A0B4J1Y8	-0.404597	0.404597	0.0108237	0.00727801	124	A0A0B4J1Y8	IGLV9-49	Immunoglobulin lambda variable 9-49	LV949_HUMAN	1	-24.4553	0.755447	Dengue	QC	NaN	NaN	NaN	105.403	0.100658
Dengue / QC	_LPVANPQAC[Carbamidomethyl (C)]ENWLR_	B4DPQ0	-0.287004	0.287004	0.00597823	0.00436141	174	B4DPQ0	C1R	Complement C1r subcomponent	B4DPQ0_HUMAN	1	-18.0398	0.819602	Dengue	QC	NaN	NaN	NaN	56.2701	0.0912692
Dengue / QC	_GLYLETEAGYYK_	P04275	0.141141	0.141141	0.47946	0.173589	40	P04275	VWF	von Willebrand factor	VWF_HUMAN	1	10.2777	1.10278	Dengue	QC	NaN	NaN	NaN	4.09902	0.335116
Dengue / QC	_QEPGENSEILPTLK_	A0A087X1J7;P22352	-0.17181	0.17181	0.000886462	0.000815902	166	A0A087X1J7;P22352	GPX3	Glutathione peroxidase;Glutathione peroxidase 3	A0A087X1J7_HUMAN;GPX3_HUMAN	1	-11.2272	0.887728	Dengue	QC	NaN	NaN	NaN	70.476	0.0749806
Dengue / QC	_VVSVLTVLHQDWLNGK_	P01857	-0.340743	0.340743	0.0531518	0.0284816	176	P01857	IGHG1	Immunoglobulin heavy constant gamma 1	IGHG1_HUMAN	1	-21.0366	0.789634	Dengue	QC	NaN	NaN	NaN	74.473	0.132173
Dengue / QC	_DASGATFTWTPSSGK_	A0A0G2JMB2	-0.261961	0.261961	0.0507809	0.0274215	176	A0A0G2JMB2	IGHA2	Immunoglobulin heavy constant alpha 2 (Fragment)	A0A0G2JMB2_HUMAN	1	-16.6046	0.833954	Dengue	QC	NaN	NaN	NaN	125.373	0.131542
Dengue / QC	_YKEENDDFASFR_	P04196	-0.232975	0.232975	9.17289e-06	1.40653e-05	176	P04196	HRG	Histidine-rich glycoprotein	HRG_HUMAN	1	-14.9122	0.850878	Dengue	QC	NaN	NaN	NaN	72.9599	0.0543685
Dengue / QC	_AVDTWSWGER_	Q08380	-0.250584	0.250584	0.029788	0.0173841	172	Q08380	LGALS3BP	Galectin-3-binding protein	LG3BP_HUMAN	1	-15.9444	0.840556	Dengue	QC	NaN	NaN	NaN	104.604	0.117645
Dengue / QC	_TVAPAEC[Carbamidomethyl (C)]S_	P15814	-0.281469	0.281469	0.31885	0.125761	158	P15814	IGLL1	Immunoglobulin lambda-like polypeptide 1	IGLL1_HUMAN	1	-17.7247	0.822753	Dengue	QC	NaN	NaN	NaN	127.413	0.25893
Dengue / QC	_LAARLEALKENGGAR_	P02647	-0.0549139	0.0549139	0.29656	0.118632	60	P02647	APOA1	Apolipoprotein A-I	APOA1_HUMAN	1	-3.73481	0.962652	Dengue	QC	NaN	NaN	NaN	17.9296	0.241001
Dengue / QC	_ELGC[Carbamidomethyl (C)]GAASGTPSGILYEPPAEKEQK_	O43866	-0.237352	0.237352	0.143842	0.0655323	176	O43866	CD5L	CD5 antigen-like	CD5L_HUMAN	1	-15.1699	0.848301	Dengue	QC	NaN	NaN	NaN	53.8163	0.174477
Dengue / QC	_DNSKNTLYLQMGSLR_	A0A075B6Q5	-0.234441	0.234441	0.012789	0.00840464	110	A0A075B6Q5	IGHV3-64	Immunoglobulin heavy variable 3-64	HV364_HUMAN	1	-14.9986	0.850014	Dengue	QC	NaN	NaN	NaN	73.2663	0.101311
Dengue / QC	_NWGLGGHAFC[Carbamidomethyl (C)]R_	P00748	-0.245506	0.245506	0.000191142	0.000210274	148	P00748	F12	Coagulation factor XII	FA12_HUMAN	1	-15.648	0.84352	Dengue	QC	NaN	NaN	NaN	73.9222	0.0653451
Dengue / QC	_IPIEDGSGEVVLSR_	P01024	-0.265683	0.265683	0.000261109	0.000276643	176	P01024	C3	Complement C3	CO3_HUMAN	1	-16.8195	0.831805	Dengue	QC	NaN	NaN	NaN	53.6214	0.0654776
Dengue / QC	_LGQYASPTAK_	P0C0L5	-0.259134	0.259134	0.00169826	0.00144998	176	P0C0L5	C4B	Complement C4-B	CO4B_HUMAN	1	-16.4411	0.835589	Dengue	QC	NaN	NaN	NaN	68.6715	0.0782609
Dengue / QC	_TVQAVLTVPK_	P36955	-0.30092	0.30092	0.00199209	0.00166923	170	P36955	SERPINF1	Pigment epithelium-derived factor	PEDF_HUMAN	1	-18.8265	0.811735	Dengue	QC	NaN	NaN	NaN	81.582	0.0800239
Dengue / QC	_QLANGVDR_	P01024	-0.179306	0.179306	0.0937834	0.0460458	102	P01024	C3	Complement C3	CO3_HUMAN	1	-11.6872	0.883128	Dengue	QC	NaN	NaN	NaN	22.5902	0.146055
Dengue / QC	_FQPTLLTLPR_	P05155;P05155-3	-0.262515	0.262515	0.0125705	0.00827801	164	P05155;P05155-3	SERPING1	Plasma protease C1 inhibitor;Isoform 3 of Plasma protease C1 inhibitor	IC1_HUMAN	1	-16.6366	0.833634	Dengue	QC	NaN	NaN	NaN	61.7123	0.0992287
Dengue / QC	_EDPQTFYYAVAVVKK_	P02787	-0.255683	0.255683	1.76252e-05	2.53231e-05	176	P02787	TF	Serotransferrin	TRFE_HUMAN	1	-16.2409	0.837591	Dengue	QC	NaN	NaN	NaN	85.1319	0.0559726
Dengue / QC	_ASDTAMYYC[Carbamidomethyl (C)]AR_	A0A0C4DH38	-0.25425	0.25425	0.0639148	0.0332482	174	A0A0C4DH38	IGHV5-51	Immunoglobulin heavy variable 5-51	HV551_HUMAN	1	-16.1577	0.838423	Dengue	QC	NaN	NaN	NaN	46.1424	0.133871
Dengue / QC	_YGRNQGNTWLTAFVLKTFAQAR_	P01023	0.0137907	0.0137907	0.0339184	0.0194832	132	P01023	A2M	Alpha-2-macroglobulin	A2MG_HUMAN	1	0.960485	1.0096	Dengue	QC	NaN	NaN	NaN	51.8667	0.116639
Dengue / QC	_WQEGNVFSC[Carbamidomethyl (C)]SVM[Oxidation (M)]HEALHNHYTQK_	P01861	0.339987	0.339987	0.416697	0.155494	172	P01861	IGHG4	Immunoglobulin heavy constant gamma 4	IGHG4_HUMAN	1	26.5745	1.26575	Dengue	QC	NaN	NaN	NaN	46.533	0.309778
Dengue / QC	_GSVFLRNPSR_	P0C0L5	-0.315628	0.315628	0.0147817	0.00951477	174	P0C0L5	C4B	Complement C4-B	CO4B_HUMAN	1	-19.6499	0.803501	Dengue	QC	NaN	NaN	NaN	55.8917	0.100811
Dengue / QC	_KIC[Carbamidomethyl (C)]LDPDAPR_	P02775	-0.250106	0.250106	0.00232744	0.0019122	170	P02775	PPBP	Platelet basic protein	CXCL7_HUMAN	1	-15.9165	0.840835	Dengue	QC	NaN	NaN	NaN	90.4329	0.0808856
Dengue / QC	_C[Carbamidomethyl (C)]SGEEQSLEQC[Carbamidomethyl (C)]QHR_	O43866	-0.266005	0.266005	0.14602	0.0662997	144	O43866	CD5L	CD5 antigen-like	CD5L_HUMAN	1	-16.8381	0.831619	Dengue	QC	NaN	NaN	NaN	44.5999	0.171255
Dengue / QC	_VTGEGC[Carbamidomethyl (C)]VYLQTSLK_	P01023	-0.287214	0.287214	0.0673434	0.0347435	176	P01023	A2M	Alpha-2-macroglobulin	A2MG_HUMAN	1	-18.0517	0.819483	Dengue	QC	NaN	NaN	NaN	57.4002	0.135737
Dengue / QC	_VSWYQQPPGTAPK_	A0A075B6J9	-0.205606	0.205606	0.0683469	0.0351575	174	A0A075B6J9	IGLV2-18	Immunoglobulin lambda variable 2-18	LV218_HUMAN	1	-13.2826	0.867174	Dengue	QC	NaN	NaN	NaN	89.3603	0.13716
Dengue / QC	_GPGGVWAAK_	A0A096LPE2	-0.316152	0.316152	0.18926	0.0819043	140	A0A096LPE2	SAA2-SAA4	SAA2-SAA4 readthrough	A0A096LPE2_HUMAN	1	-19.6791	0.803209	Dengue	QC	NaN	NaN	NaN	27.5753	0.187738
Dengue / QC	_VELEVPQLC[Carbamidomethyl (C)]SFILK_	P04114	0.176916	0.176916	0.3265	0.128009	158	P04114	APOB	Apolipoprotein B-100	APOB_HUMAN	1	13.0465	1.13047	Dengue	QC	NaN	NaN	NaN	31.944	0.253202
Dengue / QC	_EGVQKEDIPPADLSDQVPDTESETR_	P01024	-0.0765699	0.0765699	0.16542	0.0734095	162	P01024	C3	Complement C3	CO3_HUMAN	1	-5.16904	0.94831	Dengue	QC	NaN	NaN	NaN	28.2756	0.176927
Dengue / QC	_APGELEHGLITFSTR_	P48740	-0.230909	0.230909	4.82303e-05	6.22292e-05	170	P48740	MASP1	Mannan-binding lectin serine protease 1	MASP1_HUMAN	1	-14.7902	0.852098	Dengue	QC	NaN	NaN	NaN	66.916	0.0578389
Dengue / QC	_EELLPAQDIK_	B4E1Z4	-0.254296	0.254296	0.000122456	0.000142425	176	B4E1Z4	NaN	cDNA FLJ55673, highly similar to Complement factor B (EC 3.4.21.47)	B4E1Z4_HUMAN	1	-16.1604	0.838396	Dengue	QC	NaN	NaN	NaN	58.6263	0.0610764
Dengue / QC	_QPVPGQQMTLK_	P01024	-0.251271	0.251271	0.000249287	0.000265385	174	P01024	C3	Complement C3	CO3_HUMAN	1	-15.9844	0.840156	Dengue	QC	NaN	NaN	NaN	81.6655	0.0655582
Dengue / QC	_WPEPVFGR_	O00187	-0.25301	0.25301	0.00340676	0.00266355	156	O00187	MASP2	Mannan-binding lectin serine protease 2	MASP2_HUMAN	1	-16.0856	0.839144	Dengue	QC	NaN	NaN	NaN	51.1697	0.0817363
Dengue / QC	_VELLHNPAFC[Carbamidomethyl (C)]SLATTK_	P01024	-0.252652	0.252652	0.00522836	0.00386963	176	P01024	C3	Complement C3	CO3_HUMAN	1	-16.0648	0.839352	Dengue	QC	NaN	NaN	NaN	56.1213	0.0863419
Dengue / QC	_LESEETMVLEAHDAQGDVPVTVTVHDFPGKK_	P01024	-0.284838	0.284838	0.0477088	0.0260632	176	P01024	C3	Complement C3	CO3_HUMAN	1	-17.9166	0.820834	Dengue	QC	NaN	NaN	NaN	42.9346	0.123013
Dengue / QC	_AKWEMPFDPQDTHQSR_	P01011	-0.244139	0.244139	0.00206852	0.00172551	166	P01011	SERPINA3	Alpha-1-antichymotrypsin	AACT_HUMAN	1	-15.5681	0.844319	Dengue	QC	NaN	NaN	NaN	85.7399	0.0788841
Dengue / QC	_MFTTAPDQVDKEDEDFQESNK_	P00450	-0.170531	0.170531	0.0010303	0.000932081	176	P00450	CP	Ceruloplasmin	CERU_HUMAN	1	-11.1485	0.888515	Dengue	QC	NaN	NaN	NaN	55.2541	0.0720702
Dengue / QC	_SVSGSPGQSVTISC[Carbamidomethyl (C)]TGTSSDVGGYNYVSWYQQHPGKAPK_	P01706	-0.00111675	0.00111675	0.0926737	0.0455863	76	P01706	IGLV2-11	Immunoglobulin lambda variable 2-11	LV211_HUMAN	1	-0.0773776	0.999226	Dengue	QC	NaN	NaN	NaN	53.9197	0.145612
Dengue / QC	_ITTTSPWMFPSR_	P04180	-0.182966	0.182966	0.000524621	0.000512107	168	P04180	LCAT	Phosphatidylcholine-sterol acyltransferase	LCAT_HUMAN	1	-11.911	0.88089	Dengue	QC	NaN	NaN	NaN	58.3623	0.0678551
Dengue / QC	_NPDADKGPWC[Carbamidomethyl (C)]FTTDPSVR_	P00747	-0.366442	0.366442	0.0264217	0.0156895	176	P00747	PLG	Plasminogen	PLMN_HUMAN	1	-22.4307	0.775693	Dengue	QC	NaN	NaN	NaN	54.7502	0.109121
Dengue / QC	_LQAEAFQAR_	P02649	-0.286559	0.286559	0.0445187	0.0246094	152	P02649	APOE	Apolipoprotein E	APOE_HUMAN	1	-18.0145	0.819855	Dengue	QC	NaN	NaN	NaN	54.0113	0.121012
Dengue / QC	_SFFSFLGEAFDGAR_	P0DJI8	-0.273221	0.273221	0.352703	0.13609	160	P0DJI8	SAA1	Serum amyloid A-1 protein	SAA1_HUMAN	1	-17.253	0.82747	Dengue	QC	NaN	NaN	NaN	115.614	0.266669
Dengue / QC	_TEGDGVYTLNDK_	P00738	-0.256631	0.256631	0.0268047	0.0158824	174	P00738	HP	Haptoglobin	HPT_HUMAN	1	-16.296	0.83704	Dengue	QC	NaN	NaN	NaN	68.7393	0.109828
Dengue / QC	_SIYKPGQTVK_	P01023	-0.324957	0.324957	0.0552595	0.029433	176	P01023	A2M	Alpha-2-macroglobulin	A2MG_HUMAN	1	-20.1678	0.798322	Dengue	QC	NaN	NaN	NaN	63.3942	0.126874
Dengue / QC	_EGWIHTVC[Carbamidomethyl (C)]INGR_	P08603	-0.203623	0.203623	0.0154581	0.00989056	174	P08603	CFH	Complement factor H	CFAH_HUMAN	1	-13.1633	0.868367	Dengue	QC	NaN	NaN	NaN	35.8729	0.0970298
Dengue / QC	_DGSPDVTTADIGANTPDATKGC[Carbamidomethyl (C)]PDVQASLPDAK_	Q96PD5	-0.218362	0.218362	0.181418	0.0791599	22	Q96PD5	PGLYRP2	N-acetylmuramoyl-L-alanine amidase	PGRP2_HUMAN	1	-14.0459	0.859541	Dengue	QC	NaN	NaN	NaN	10.4395	0.171838
Dengue / QC	_EHVAHLLFLR_	P19652	-0.238057	0.238057	0.00706192	0.00502928	176	P19652	ORM2	Alpha-1-acid glycoprotein 2	A1AG2_HUMAN	1	-15.2114	0.847886	Dengue	QC	NaN	NaN	NaN	120.27	0.089741
Dengue / QC	_PKDPTFIPAPIQAK_	P01019	-0.236176	0.236176	0.00594365	0.00433892	172	P01019	AGT	Angiotensinogen	ANGT_HUMAN	1	-15.1007	0.848993	Dengue	QC	NaN	NaN	NaN	157.763	0.08796
Dengue / QC	_LPYSVVR_	P01024	-0.255974	0.255974	0.000122785	0.000142779	172	P01024	C3	Complement C3	CO3_HUMAN	1	-16.2578	0.837422	Dengue	QC	NaN	NaN	NaN	124.921	0.0617807
Dengue / QC	_IIFKNMATRPYSIHAHGVQTESSTVTPTLPGETLTYVWK_	P00450	-0.376497	0.376497	0.0207314	0.0127568	126	P00450	CP	Ceruloplasmin	CERU_HUMAN	1	-22.9694	0.770306	Dengue	QC	NaN	NaN	NaN	69.559	0.103198
Dengue / QC	_LGMDGYR_	P61626	-0.262529	0.262529	0.0554971	0.029535	92	P61626	LYZ	Lysozyme C	LYSC_HUMAN	1	-16.6375	0.833625	Dengue	QC	NaN	NaN	NaN	71.232	0.125419
Dengue / QC	_SVIPSDGPSVAC[Carbamidomethyl (C)]VKK_	P02787	-0.207921	0.207921	0.00262794	0.00212251	176	P02787	TF	Serotransferrin	TRFE_HUMAN	1	-13.4216	0.865784	Dengue	QC	NaN	NaN	NaN	50.4904	0.0770983
Dengue / QC	_ILAGPAGDSNVVK_	P04275	-0.303424	0.303424	0.0291275	0.0170521	168	P04275	VWF	von Willebrand factor	VWF_HUMAN	1	-18.9673	0.810327	Dengue	QC	NaN	NaN	NaN	162.516	0.110756
Dengue / QC	_RGHLFLQTDQPIYNPGQR_	P0C0L5	-0.202222	0.202222	0.00355535	0.00276586	176	P0C0L5	C4B	Complement C4-B	CO4B_HUMAN	1	-13.0789	0.869211	Dengue	QC	NaN	NaN	NaN	56.785	0.0801444
Dengue / QC	_SPPGVC[Carbamidomethyl (C)]SR_	P08697	-0.238766	0.238766	0.0200017	0.0123671	136	P08697	SERPINF2	Alpha-2-antiplasmin	A2AP_HUMAN	1	-15.253	0.84747	Dengue	QC	NaN	NaN	NaN	69.9066	0.102308
Dengue / QC	_LSYTC[Carbamidomethyl (C)]EGGFR_	P08603	-0.209498	0.209498	0.0516124	0.0277854	176	P08603	CFH	Complement factor H	CFAH_HUMAN	1	-13.5162	0.864838	Dengue	QC	NaN	NaN	NaN	41.6374	0.121426
Dengue / QC	_GSSVIHC[Carbamidomethyl (C)]DADSK_	P04003	-0.00386063	0.00386063	0.0706814	0.0362098	172	P04003	C4BPA	C4b-binding protein alpha chain	C4BPA_HUMAN	1	-0.267241	0.997328	Dengue	QC	NaN	NaN	NaN	36.6573	0.130638
Dengue / QC	_VLEPTLK_	P02774;P02774-3	-0.213837	0.213837	0.0469922	0.02574	176	P02774;P02774-3	GC	Vitamin D-binding protein;Isoform 3 of Vitamin D-binding protein	VTDB_HUMAN	1	-13.7759	0.862241	Dengue	QC	NaN	NaN	NaN	39.1021	0.118205
Dengue / QC	_QGFFPDSVNK_	P04114	-0.202406	0.202406	0.0127822	0.00840203	166	P04114	APOB	Apolipoprotein B-100	APOB_HUMAN	1	-13.09	0.8691	Dengue	QC	NaN	NaN	NaN	64.2064	0.0946502
Dengue / QC	_FLC[Carbamidomethyl (C)]TGGVSPYADPNTC[Carbamidomethyl (C)]R_	B4E1Z4	-0.20127	0.20127	0.00031771	0.000329414	176	B4E1Z4	NaN	cDNA FLJ55673, highly similar to Complement factor B (EC 3.4.21.47)	B4E1Z4_HUMAN	1	-13.0216	0.869784	Dengue	QC	NaN	NaN	NaN	78.6673	0.0643522
Dengue / QC	_STQDTVIALDALSAYWIASHTTEER_	P0C0L5	-0.125092	0.125092	0.181708	0.0792593	176	P0C0L5	C4B	Complement C4-B	CO4B_HUMAN	1	-8.30547	0.916945	Dengue	QC	NaN	NaN	NaN	57.1675	0.179249
Dengue / QC	_HQFLLTGDTQGR_	P04217	-0.237559	0.237559	0.000286289	0.000300124	176	P04217	A1BG	Alpha-1B-glycoprotein	A1BG_HUMAN	1	-15.1821	0.848179	Dengue	QC	NaN	NaN	NaN	44.7786	0.0614649
Dengue / QC	_KVPQVSTPTLVEVSR_	P02768	-0.196777	0.196777	0.0220205	0.0134617	176	P02768	ALB	Serum albumin	ALBU_HUMAN	1	-12.7503	0.872497	Dengue	QC	NaN	NaN	NaN	33.9218	0.100744
Dengue / QC	_ALPTTYEK_	P02748	-0.242484	0.242484	0.100474	0.0487543	96	P02748	C9	Complement component C9	CO9_HUMAN	1	-15.4712	0.845288	Dengue	QC	NaN	NaN	NaN	32.6485	0.142805
Dengue / QC	_LKC[Carbamidomethyl (C)]DEWSVNSVGK_	P02787	-0.222327	0.222327	0.0138428	0.00900081	176	P02787	TF	Serotransferrin	TRFE_HUMAN	1	-14.2818	0.857182	Dengue	QC	NaN	NaN	NaN	40.9968	0.0936981
Dengue / QC	_ADSSPVK_	P0DOY2	-0.281189	0.281189	0.404489	0.151818	124	P0DOY2	IGLC2	Immunoglobulin lambda constant 2	IGLC2_HUMAN	1	-17.7088	0.822912	Dengue	QC	NaN	NaN	NaN	49.3624	0.286426
Dengue / QC	_YGQTIRPIC[Carbamidomethyl (C)]LPC[Carbamidomethyl (C)]TEGTTR_	B4E1Z4	-0.302239	0.302239	0.0381691	0.0215452	176	B4E1Z4	NaN	cDNA FLJ55673, highly similar to Complement factor B (EC 3.4.21.47)	B4E1Z4_HUMAN	1	-18.9007	0.810993	Dengue	QC	NaN	NaN	NaN	45.7104	0.112432
Dengue / QC	_LRPVAAEVYGTER_	E7ER44;P02788	-0.288224	0.288224	0.13301	0.0613826	114	E7ER44;P02788	LTF	Lactotransferrin	E7ER44_HUMAN;TRFL_HUMAN	1	-18.109	0.81891	Dengue	QC	NaN	NaN	NaN	98.7266	0.158185
Dengue / QC	_SNEKAEEWGR_	A0A096LPE2	-0.280762	0.280762	0.119982	0.0564542	126	A0A096LPE2	SAA2-SAA4	SAA2-SAA4 readthrough	A0A096LPE2_HUMAN	1	-17.6844	0.823156	Dengue	QC	NaN	NaN	NaN	56.5559	0.151759
Dengue / QC	_AGVETTKPSKQSNNK_	A0A0B4J231;B9A064	0.00680014	0.00680014	0.485708	0.175389	54	A0A0B4J231;B9A064	IGLL5	Immunoglobulin lambda-like polypeptide 5	A0A0B4J231_HUMAN;IGLL5_HUMAN	1	0.472463	1.00472	Dengue	QC	NaN	NaN	NaN	16.3355	0.335711
Dengue / QC	_RPSGIPDR_	P01701	-0.172447	0.172447	0.146995	0.0666733	108	P01701	IGLV1-51	Immunoglobulin lambda variable 1-51	LV151_HUMAN	1	-11.2664	0.887336	Dengue	QC	NaN	NaN	NaN	61.016	0.162957
Dengue / QC	_FLENEDRR_	P01009	-0.267121	0.267121	0.0556735	0.0296043	174	P01009	SERPINA1	Alpha-1-antitrypsin	A1AT_HUMAN	1	-16.9024	0.830976	Dengue	QC	NaN	NaN	NaN	64.5325	0.122585
Dengue / QC	_EMSGSPASGIPVK_	P0C0L5	-0.263031	0.263031	0.000591182	0.000569754	176	P0C0L5	C4B	Complement C4-B	CO4B_HUMAN	1	-16.6665	0.833335	Dengue	QC	NaN	NaN	NaN	111.831	0.0675476
Dengue / QC	_VEC[Carbamidomethyl (C)]SDNLFTQR_	P48740	-0.193934	0.193934	0.0043585	0.00330381	138	P48740	MASP1	Mannan-binding lectin serine protease 1	MASP1_HUMAN	1	-12.5782	0.874218	Dengue	QC	NaN	NaN	NaN	56.9196	0.0803107
Dengue / QC	_EGDC[Carbamidomethyl (C)]PVQSGK_	P01042	-0.277953	0.277953	0.102856	0.0496512	166	P01042	KNG1	Kininogen-1	KNG1_HUMAN	1	-17.524	0.82476	Dengue	QC	NaN	NaN	NaN	42.9817	0.143057
Dengue / QC	_SGTASVVC[Carbamidomethyl (C)]LLNNFYPR_	P01834	-0.195742	0.195742	0.212228	0.0900134	176	P01834	IGKC	Immunoglobulin kappa constant	IGKC_HUMAN	1	-12.6877	0.873123	Dengue	QC	NaN	NaN	NaN	58.9721	0.189011
Dengue / QC	_GKWERPFEVK_	P01009	0.0970016	0.0970016	0.524987	0.186547	92	P01009	SERPINA1	Alpha-1-antitrypsin	A1AT_HUMAN	1	6.95483	1.06955	Dengue	QC	NaN	NaN	NaN	23.2156	0.367951
Dengue / QC	_EVQLVESGGGLVQPGGSLR_	A0A0B4J2B5	-0.325847	0.325847	0.112969	0.0536885	176	A0A0B4J2B5	IGHV3OR16-9	Immunoglobulin heavy variable 3/OR16-9 (non-functional) (Fragment)	A0A0B4J2B5_HUMAN	1	-20.217	0.79783	Dengue	QC	NaN	NaN	NaN	55.4879	0.147394
Dengue / QC	_ENLDRDIALMK_	P00734	-0.257717	0.257717	0.000164912	0.000184265	170	P00734	F2	Prothrombin	THRB_HUMAN	1	-16.3589	0.836411	Dengue	QC	NaN	NaN	NaN	95.8629	0.0603684
Dengue / QC	_AEEEHLGILGPQLHADVGDKVK_	P00450	-0.185868	0.185868	0.0346846	0.0198601	156	P00450	CP	Ceruloplasmin	CERU_HUMAN	1	-12.088	0.87912	Dengue	QC	NaN	NaN	NaN	82.4284	0.110129
Dengue / QC	_RLPLEYSYGEYRDLFR_	P07358	-0.0248968	0.0248968	0.482328	0.174408	30	P07358	C8B	Complement component C8 beta chain	CO8B_HUMAN	1	-1.71091	0.982891	Dengue	QC	NaN	NaN	NaN	7.76993	0.320414
Dengue / QC	_C[Carbamidomethyl (C)]DEWSVNSVGK_	P02787	-0.251002	0.251002	0.00252406	0.00205385	176	P02787	TF	Serotransferrin	TRFE_HUMAN	1	-15.9688	0.840312	Dengue	QC	NaN	NaN	NaN	73.1642	0.0755625
Dengue / QC	_GTHC[Carbamidomethyl (C)]NQVEVIATLK_	P02775	-0.272018	0.272018	0.00653881	0.00470823	160	P02775	PPBP	Platelet basic protein	CXCL7_HUMAN	1	-17.184	0.82816	Dengue	QC	NaN	NaN	NaN	72.8514	0.0842556
Dengue / QC	_EIFNMAR_	P04114	-0.318954	0.318954	0.195865	0.0842077	54	P04114	APOB	Apolipoprotein B-100	APOB_HUMAN	1	-19.8349	0.801651	Dengue	QC	NaN	NaN	NaN	4.11013	0.152278
Dengue / QC	_FQNALLVR_	P02768	-0.226175	0.226175	0.0111717	0.00747718	176	P02768	ALB	Serum albumin	ALBU_HUMAN	1	-14.5101	0.854899	Dengue	QC	NaN	NaN	NaN	62.1844	0.0898212
Dengue / QC	_HNVYINGITYTPVSSTNEK_	P01023	-0.196814	0.196814	0.0335953	0.0193226	160	P01023	A2M	Alpha-2-macroglobulin	A2MG_HUMAN	1	-12.7525	0.872475	Dengue	QC	NaN	NaN	NaN	98.1284	0.108842
Dengue / QC	_IKVTTSQDMLSIMEK_	P05155;P05155-3	-0.234267	0.234267	0.0363641	0.0206781	176	P05155;P05155-3	SERPING1	Plasma protease C1 inhibitor;Isoform 3 of Plasma protease C1 inhibitor	IC1_HUMAN	1	-14.9883	0.850117	Dengue	QC	NaN	NaN	NaN	47.2009	0.108681
Dengue / QC	_VLNYVDWIKK_	B4DPQ0	-0.157968	0.157968	0.00213021	0.00177057	158	B4DPQ0	C1R	Complement C1r subcomponent	B4DPQ0_HUMAN	1	-10.3714	0.896286	Dengue	QC	NaN	NaN	NaN	71.657	0.0734476
Dengue / QC	_TPWHVTIKPK_	B4E1Z4	-0.186528	0.186528	0.19087	0.0824649	126	B4E1Z4	NaN	cDNA FLJ55673, highly similar to Complement factor B (EC 3.4.21.47)	B4E1Z4_HUMAN	1	-12.1282	0.878718	Dengue	QC	NaN	NaN	NaN	41.0048	0.175654
Dengue / QC	_AGGSWDLAVQER_	P22792	-0.13701	0.13701	0.0240097	0.0144836	176	P22792	CPN2	Carboxypeptidase N subunit 2	CPN2_HUMAN	1	-9.05984	0.909402	Dengue	QC	NaN	NaN	NaN	45.7553	0.0997977
Dengue / QC	_QVFLYPEKDEPTYILNIKR_	P04114	-0.322191	0.322191	0.0509115	0.0274721	176	P04114	APOB	Apolipoprotein B-100	APOB_HUMAN	1	-20.0146	0.799854	Dengue	QC	NaN	NaN	NaN	50.5705	0.116426
Dengue / QC	_HTSLGPLEAK_	P07357	-0.258296	0.258296	0.00713059	0.00507193	170	P07357	C8A	Complement component C8 alpha chain	CO8A_HUMAN	1	-16.3925	0.836075	Dengue	QC	NaN	NaN	NaN	64.1363	0.0837452
Dengue / QC	_LC[Carbamidomethyl (C)]MAALK_	P02774;P02774-3	-0.188727	0.188727	0.0790451	0.0398297	176	P02774;P02774-3	GC	Vitamin D-binding protein;Isoform 3 of Vitamin D-binding protein	VTDB_HUMAN	1	-12.2621	0.877379	Dengue	QC	NaN	NaN	NaN	42.012	0.129291
Dengue / QC	_AVLYNYR_	P01024	-0.228234	0.228234	0.00616063	0.0044713	176	P01024	C3	Complement C3	CO3_HUMAN	1	-14.6321	0.853679	Dengue	QC	NaN	NaN	NaN	67.5781	0.0822591
Dengue / QC	_EDPQTFYYAVAVVK_	P02787	-0.194709	0.194709	0.0139756	0.00906463	176	P02787	TF	Serotransferrin	TRFE_HUMAN	1	-12.6251	0.873749	Dengue	QC	NaN	NaN	NaN	98.6823	0.0928097
Dengue / QC	_YGAATFTR_	P01023	-0.272878	0.272878	0.0598949	0.0314949	176	P01023	A2M	Alpha-2-macroglobulin	A2MG_HUMAN	1	-17.2333	0.827667	Dengue	QC	NaN	NaN	NaN	63.3628	0.121167
Dengue / QC	_RPYFPVAVGK_	P08603	-0.24154	0.24154	0.000233668	0.000250933	176	P08603	CFH	Complement factor H	CFAH_HUMAN	1	-15.4158	0.845842	Dengue	QC	NaN	NaN	NaN	70.9118	0.0597059
Dengue / QC	_SPVGVQPILNEHTFC[Carbamidomethyl (C)]AGM[Oxidation (M)]SK_	P00738	-0.170735	0.170735	0.0690828	0.0354854	174	P00738	HP	Haptoglobin	HPT_HUMAN	1	-11.161	0.88839	Dengue	QC	NaN	NaN	NaN	53.2679	0.124711
Dengue / QC	_EEHRIPER_	Q06033;Q06033-2	-0.706823	0.706823	0.720154	0.238947	14	Q06033;Q06033-2	ITIH3	Inter-alpha-trypsin inhibitor heavy chain H3;Isoform 2 of Inter-alpha-trypsin inhibitor heavy chain H3	ITIH3_HUMAN	1	-38.7332	0.612668	Dengue	QC	NaN	NaN	NaN	6.74814	0.61931
Dengue / QC	_NNNRPSGISER_	A0A075B6I4;A0A1W2PQ80	-0.0642629	0.0642629	0.281967	0.114052	130	A0A075B6I4;A0A1W2PQ80	IGLV10-54	Immunoglobulin lambda variable 10-54	LVX54_HUMAN;A0A1W2PQ80_HUMAN	1	-4.35662	0.956434	Dengue	QC	NaN	NaN	NaN	31.5873	0.211298
Dengue / QC	_MC[Carbamidomethyl (C)]PQLQQYEMHGPEGLR_	P01023	-0.202562	0.202562	0.0110775	0.00742618	176	P01023	A2M	Alpha-2-macroglobulin	A2MG_HUMAN	1	-13.0994	0.869006	Dengue	QC	NaN	NaN	NaN	67.683	0.0885213
Dengue / QC	_M[Oxidation (M)]PC[Carbamidomethyl (C)]AEDYLSVVLNQLC[Carbamidomethyl (C)]VLHEKTPVSDR_	P02768	0.570839	0.570839	0.416682	0.155494	104	P02768	ALB	Serum albumin	ALBU_HUMAN	1	48.5387	1.48539	Dengue	QC	NaN	NaN	NaN	16.5432	0.277511
Dengue / QC	_VYLPWSR_	Q92496;Q92496-2	-0.200926	0.200926	0.0289604	0.0169784	158	Q92496;Q92496-2	CFHR4	Complement factor H-related protein 4;Isoform 2 of Complement factor H-related protein 4	FHR4_HUMAN	1	-13.0008	0.869992	Dengue	QC	NaN	NaN	NaN	60.0741	0.103288
Dengue / QC	_TYC[Carbamidomethyl (C)]SEPEKVDKDNEDFQESNR_	P00450	-0.202846	0.202846	0.0992133	0.0482519	176	P00450	CP	Ceruloplasmin	CERU_HUMAN	1	-13.1165	0.868835	Dengue	QC	NaN	NaN	NaN	44.6866	0.137202
Dengue / QC	_ITC[Carbamidomethyl (C)]SGDALPK_	A0A075B6K4	-0.266893	0.266893	0.129307	0.0599662	176	A0A075B6K4	IGLV3-10	Immunoglobulin lambda variable 3-10	LV310_HUMAN	1	-16.8892	0.831108	Dengue	QC	NaN	NaN	NaN	69.286	0.150372
Dengue / QC	_LTLDIQNK_	P04114	-0.228529	0.228529	0.0595052	0.0313328	166	P04114	APOB	Apolipoprotein B-100	APOB_HUMAN	1	-14.6495	0.853505	Dengue	QC	NaN	NaN	NaN	48.5242	0.119126
Dengue / QC	_ITLPDFR_	P04114	-0.215883	0.215883	0.00276463	0.00222296	162	P04114	APOB	Apolipoprotein B-100	APOB_HUMAN	1	-13.8981	0.861019	Dengue	QC	NaN	NaN	NaN	70.0097	0.0740411
Dengue / QC	_KC[Carbamidomethyl (C)]STSSLLEAC[Carbamidomethyl (C)]TFR_	P02787	-0.24138	0.24138	0.00015342	0.000173439	176	P02787	TF	Serotransferrin	TRFE_HUMAN	1	-15.4064	0.845936	Dengue	QC	NaN	NaN	NaN	59.4025	0.0565756
Dengue / QC	_ADIGC[Carbamidomethyl (C)]TPGSGKDYAGVFSDAGLTFTSSSGQQTAQR_	P01024	-0.179224	0.179224	0.0251896	0.0150772	176	P01024	C3	Complement C3	CO3_HUMAN	1	-11.6822	0.883178	Dengue	QC	NaN	NaN	NaN	56.5178	0.0994007
Dengue / QC	_DDEEFIESNK_	P00450	-0.0676309	0.0676309	0.0290172	0.0169998	106	P00450	CP	Ceruloplasmin	CERU_HUMAN	1	-4.57964	0.954204	Dengue	QC	NaN	NaN	NaN	42.0686	0.100915
Dengue / QC	_SLYVSATVILHSGSDM[Oxidation (M)]VQAER_	P01024	-0.262821	0.262821	0.308881	0.1226	88	P01024	C3	Complement C3	CO3_HUMAN	1	-16.6544	0.833456	Dengue	QC	NaN	NaN	NaN	25.3023	0.219466
Dengue / QC	_C[Carbamidomethyl (C)]LVEKGDVAFVK_	P02787	-0.206807	0.206807	0.0102566	0.00694932	176	P02787	TF	Serotransferrin	TRFE_HUMAN	1	-13.3547	0.866453	Dengue	QC	NaN	NaN	NaN	45.3469	0.0849307
Dengue / QC	_LQPLDFK_	P01008	-0.205574	0.205574	0.0015796	0.00136035	174	P01008	SERPINC1	Antithrombin-III	ANT3_HUMAN	1	-13.2806	0.867194	Dengue	QC	NaN	NaN	NaN	85.7019	0.0696613
Dengue / QC	_GEVQAMLGQSTEELRVR_	P02649	-0.025843	0.025843	0.072446	0.0369596	128	P02649	APOE	Apolipoprotein E	APOE_HUMAN	1	-1.77535	0.982246	Dengue	QC	NaN	NaN	NaN	49.5545	0.123852
Dengue / QC	_KALYLQYTDETFR_	P00450	-0.2294	0.2294	0.00023022	0.000247553	176	P00450	CP	Ceruloplasmin	CERU_HUMAN	1	-14.701	0.85299	Dengue	QC	NaN	NaN	NaN	84.5748	0.0588565
Dengue / QC	_QGALELIKK_	P01024	-0.295553	0.295553	0.109725	0.0523798	142	P01024	C3	Complement C3	CO3_HUMAN	1	-18.524	0.81476	Dengue	QC	NaN	NaN	NaN	40.9091	0.138141
Dengue / QC	_TFTLLDPK_	Q96PD5	-0.224051	0.224051	0.010183	0.00690761	166	Q96PD5	PGLYRP2	N-acetylmuramoyl-L-alanine amidase	PGRP2_HUMAN	1	-14.3842	0.856158	Dengue	QC	NaN	NaN	NaN	77.4647	0.085545
Dengue / QC	_QKLHELQEK_	P02647	-0.289834	0.289834	0.474693	0.172241	132	P02647	APOA1	Apolipoprotein A-I	APOA1_HUMAN	1	-18.2004	0.817996	Dengue	QC	NaN	NaN	NaN	38.5452	0.312105
Dengue / QC	_IQPSGGTNINEALLR_	P19823	-0.240114	0.240114	0.0052927	0.00391023	176	P19823	ITIH2	Inter-alpha-trypsin inhibitor heavy chain H2	ITIH2_HUMAN	1	-15.3321	0.846679	Dengue	QC	NaN	NaN	NaN	75.0029	0.0782493
Dengue / QC	_DDTVC[Carbamidomethyl (C)]LAK_	P02787	-0.203061	0.203061	0.00997757	0.00678178	164	P02787	TF	Serotransferrin	TRFE_HUMAN	1	-13.1294	0.868706	Dengue	QC	NaN	NaN	NaN	60.935	0.0843838
Dengue / QC	_LELHVDGPPPRPQLR_	P04217	-0.194709	0.194709	0.00612957	0.0044516	176	P04217	A1BG	Alpha-1B-glycoprotein	A1BG_HUMAN	1	-12.6251	0.873749	Dengue	QC	NaN	NaN	NaN	57.4204	0.0788387
Dengue / QC	_QGYQLIEGNQVLHSFTAVC[Carbamidomethyl (C)]QDDGTWHR_	B4DPQ0	-0.197659	0.197659	0.0644123	0.0334647	174	B4DPQ0	C1R	Complement C1r subcomponent	B4DPQ0_HUMAN	1	-12.8036	0.871964	Dengue	QC	NaN	NaN	NaN	51.9335	0.118541
Dengue / QC	_LSITGTYDLK_	P01009	-0.261641	0.261641	0.00357822	0.00278215	174	P01009	SERPINA1	Alpha-1-antitrypsin	A1AT_HUMAN	1	-16.5861	0.834139	Dengue	QC	NaN	NaN	NaN	123.613	0.0754056
Dengue / QC	_AAC[Carbamidomethyl (C)]LLPK_	P02768	-0.226248	0.226248	0.00224628	0.00185581	176	P02768	ALB	Serum albumin	ALBU_HUMAN	1	-14.5145	0.854855	Dengue	QC	NaN	NaN	NaN	49.1053	0.0693696
Dengue / QC	_YSPGGTPTAIK_	H0YAC1;P03952	-0.199366	0.199366	0.000875059	0.000806564	168	H0YAC1;P03952	KLKB1	Plasma kallikrein (Fragment);Plasma kallikrein	H0YAC1_HUMAN;KLKB1_HUMAN	1	-12.9067	0.870933	Dengue	QC	NaN	NaN	NaN	84.5358	0.0644432
Dengue / QC	_SALVLQYLR_	P00740	-0.379916	0.379916	0.00759207	0.00534353	158	P00740	F9	Coagulation factor IX	FA9_HUMAN	1	-23.1518	0.768482	Dengue	QC	NaN	NaN	NaN	51.8913	0.0796394
Dengue / QC	_ASHEEVEGLVEK_	Q08380	-0.114861	0.114861	0.177623	0.0778021	166	Q08380	LGALS3BP	Galectin-3-binding protein	LG3BP_HUMAN	1	-7.65289	0.923471	Dengue	QC	NaN	NaN	NaN	67.2585	0.162338
Dengue / QC	_LLIYWASTR_	P06312	-0.278767	0.278767	0.0156571	0.0100002	164	P06312	IGKV4-1	Immunoglobulin kappa variable 4-1	KV401_HUMAN	1	-17.5705	0.824295	Dengue	QC	NaN	NaN	NaN	116.474	0.0901506
Dengue / QC	_SEILAHWSPAK_	P04114	-0.233675	0.233675	0.000601454	0.000578206	176	P04114	APOB	Apolipoprotein B-100	APOB_HUMAN	1	-14.9534	0.850466	Dengue	QC	NaN	NaN	NaN	94.2076	0.0622475
Dengue / QC	_DKGEYTLVVK_	P21333;P21333-2;Q5HY54	1.27146	1.27146	0.881109	0.277556	60	P21333;P21333-2;Q5HY54	FLNA	Filamin-A;Isoform 2 of Filamin-A;Filamin-A	FLNA_HUMAN;FLNA_HUMAN;Q5HY54_HUMAN	1	141.406	2.41406	Dengue	QC	NaN	NaN	NaN	10.0303	1.44048
Dengue / QC	_QDGSVDFFR_	O75636	-0.223868	0.223868	0.00603426	0.00439562	112	O75636	FCN3	Ficolin-3	FCN3_HUMAN	1	-14.3733	0.856267	Dengue	QC	NaN	NaN	NaN	64.3455	0.0776799
Dengue / QC	_FRETLEDTR_	P04114	-0.187941	0.187941	0.341958	0.132779	58	P04114	APOB	Apolipoprotein B-100	APOB_HUMAN	1	-12.2142	0.877858	Dengue	QC	NaN	NaN	NaN	10.6852	0.221403
Dengue / QC	_KPYNFLK_	P07357	-0.146495	0.146495	0.124591	0.0581863	96	P07357	C8A	Complement component C8 alpha chain	CO8A_HUMAN	1	-9.65573	0.903443	Dengue	QC	NaN	NaN	NaN	29.6783	0.139217
Dengue / QC	_SQLVYQSR_	Q08380	-0.190635	0.190635	0.19213	0.0828854	134	Q08380	LGALS3BP	Galectin-3-binding protein	LG3BP_HUMAN	1	-12.378	0.87622	Dengue	QC	NaN	NaN	NaN	63.5779	0.166021
Dengue / QC	_ENEGFTVTAEGK_	P01024	-0.220309	0.220309	0.0488123	0.026588	170	P01024	C3	Complement C3	CO3_HUMAN	1	-14.1619	0.858381	Dengue	QC	NaN	NaN	NaN	58.5492	0.108752
Dengue / QC	_AVQPGETYTYK_	A0A0A0MRJ7;P12259	-0.185964	0.185964	0.00252998	0.00205692	164	A0A0A0MRJ7;P12259	F5	Coagulation factor V	A0A0A0MRJ7_HUMAN;FA5_HUMAN	1	-12.0939	0.879061	Dengue	QC	NaN	NaN	NaN	62.461	0.0694774
Dengue / QC	_GQIVFMNREPK_	P0C0L5	-0.293865	0.293865	0.00764278	0.00537332	158	P0C0L5	C4B	Complement C4-B	CO4B_HUMAN	1	-18.4286	0.815714	Dengue	QC	NaN	NaN	NaN	82.6718	0.0797676
Dengue / QC	_GGVNDNFQGVLQNVR_	P07996	-0.265384	0.265384	0.0501769	0.0271731	162	P07996	THBS1	Thrombospondin-1	TSP1_HUMAN	1	-16.8023	0.831977	Dengue	QC	NaN	NaN	NaN	49.0924	0.108549
Dengue / QC	_EGTC[Carbamidomethyl (C)]PEAPTDEC[Carbamidomethyl (C)]KPVK_	P02787	-0.14722	0.14722	0.0413146	0.0231016	176	P02787	TF	Serotransferrin	TRFE_HUMAN	1	-9.70114	0.902989	Dengue	QC	NaN	NaN	NaN	51.7589	0.104088
Dengue / QC	_ALPAPIEK_	P01857	-0.184642	0.184642	0.192842	0.083118	176	P01857	IGHG1	Immunoglobulin heavy constant gamma 1	IGHG1_HUMAN	1	-12.0133	0.879867	Dengue	QC	NaN	NaN	NaN	43.5828	0.164655
Dengue / QC	_FDEFFSEGC[Carbamidomethyl (C)]APGSKK_	P02787	-0.214577	0.214577	0.00174266	0.00148263	176	P02787	TF	Serotransferrin	TRFE_HUMAN	1	-13.8201	0.861799	Dengue	QC	NaN	NaN	NaN	125.432	0.0680439
Dengue / QC	_C[Carbamidomethyl (C)]LKDGAGDVAFVK_	P02787	-0.179732	0.179732	0.0452377	0.0249304	176	P02787	TF	Serotransferrin	TRFE_HUMAN	1	-11.7133	0.882867	Dengue	QC	NaN	NaN	NaN	51.3652	0.105883
Dengue / QC	_RGILTLK_	P60709	-0.316839	0.316839	0.287748	0.115876	76	P60709	ACTB	Actin, cytoplasmic 1	ACTB_HUMAN	1	-19.7173	0.802827	Dengue	QC	NaN	NaN	NaN	33.492	0.201051
Dengue / QC	_LPYQC[Carbamidomethyl (C)]PK_	E7ETH0;G3XAM2;P05156	-0.139729	0.139729	0.113603	0.0539407	170	E7ETH0;G3XAM2;P05156	CFI	Complement factor I	E7ETH0_HUMAN;G3XAM2_HUMAN;CFAI_HUMAN	1	-9.23106	0.907689	Dengue	QC	NaN	NaN	NaN	53.6519	0.134843
Dengue / QC	_KVLLDGVQNPR_	P01024	-0.192454	0.192454	0.0581161	0.0306994	176	P01024	C3	Complement C3	CO3_HUMAN	1	-12.4884	0.875116	Dengue	QC	NaN	NaN	NaN	54.5353	0.111993
Dengue / QC	_EVYGFNPEGK_	P04114	-0.212936	0.212936	0.00145648	0.00126698	162	P04114	APOB	Apolipoprotein B-100	APOB_HUMAN	1	-13.722	0.86278	Dengue	QC	NaN	NaN	NaN	95.5475	0.0660969
Dengue / QC	_ELC[Carbamidomethyl (C)]SAC[Carbamidomethyl (C)]HNER_	O00391	-0.160956	0.160956	0.730282	0.241308	12	O00391	QSOX1	Sulfhydryl oxidase 1	QSOX1_HUMAN	1	-10.5568	0.894432	Dengue	QC	NaN	NaN	NaN	2.74084	0.567341
Dengue / QC	_ARMEEMGSR_	P02649	-0.0491497	0.0491497	0.376493	0.143394	56	P02649	APOE	Apolipoprotein E	APOE_HUMAN	1	-3.34942	0.966506	Dengue	QC	NaN	NaN	NaN	13.4186	0.236774
Dengue / QC	_VSEADSSNADWVTK_	B4E1Z4	-0.224262	0.224262	0.0237503	0.0143421	176	B4E1Z4	NaN	cDNA FLJ55673, highly similar to Complement factor B (EC 3.4.21.47)	B4E1Z4_HUMAN	1	-14.3967	0.856033	Dengue	QC	NaN	NaN	NaN	48.8925	0.0926265
Dengue / QC	_YYADSVK_	A0A0J9YVT0;P0DP02	-0.236462	0.236462	0.00699146	0.00498587	164	A0A0J9YVT0;P0DP02	IGHV3-33;IGHV3-30-3	Immunoglobulin heavy variable 3-33 (Fragment);Immunoglobulin heavy variable 3-30-3	A0A0J9YVT0_HUMAN;HVC33_HUMAN	1	-15.1176	0.848824	Dengue	QC	NaN	NaN	NaN	117.444	0.0786191
Dengue / QC	_DIFTGLIGPMK_	P00450	-0.0772537	0.0772537	0.0704146	0.0360892	168	P00450	CP	Ceruloplasmin	CERU_HUMAN	1	-5.21397	0.94786	Dengue	QC	NaN	NaN	NaN	71.7188	0.117379
Dengue / QC	_VANPLSTA_	P01019	-0.199338	0.199338	0.00338434	0.00264853	176	P01019	AGT	Angiotensinogen	ANGT_HUMAN	1	-12.905	0.87095	Dengue	QC	NaN	NaN	NaN	72.5559	0.0711094
Dengue / QC	_VVAQGVGIPEDSIFTMADRGEC[Carbamidomethyl (C)]VPGEQEPEPILIPR_	P02760	-0.0723208	0.0723208	0.0603977	0.031716	174	P02760	AMBP	Protein AMBP	AMBP_HUMAN	1	-4.88933	0.951107	Dengue	QC	NaN	NaN	NaN	57.2058	0.112298
Dengue / QC	_AYWDIMISNHQNSNR_	A0A096LPE2	-0.209908	0.209908	0.0035274	0.00274804	142	A0A096LPE2	SAA2-SAA4	SAA2-SAA4 readthrough	A0A096LPE2_HUMAN	1	-13.5408	0.864592	Dengue	QC	NaN	NaN	NaN	110.141	0.0720653
Dengue / QC	_TWRNDLISATK_	P19823	-0.21132	0.21132	0.0391185	0.022008	156	P19823	ITIH2	Inter-alpha-trypsin inhibitor heavy chain H2	ITIH2_HUMAN	1	-13.6253	0.863747	Dengue	QC	NaN	NaN	NaN	65.6511	0.101936
Dengue / QC	_FSVPAGIVIPSFQALTAR_	P04114	-0.13933	0.13933	0.16546	0.0734219	172	P04114	APOB	Apolipoprotein B-100	APOB_HUMAN	1	-9.20595	0.907941	Dengue	QC	NaN	NaN	NaN	73.3879	0.153145
Dengue / QC	_ASGVPDRFSGSGSGTDFTLK_	A0A087X0Q4	-0.215186	0.215186	0.00387167	0.00297844	176	A0A087X0Q4	IGKV2-40	Immunoglobulin kappa variable 2-40	A0A087X0Q4_HUMAN	1	-13.8565	0.861435	Dengue	QC	NaN	NaN	NaN	99.3065	0.072512
Dengue / QC	_MGNFPWQVFTNIHGR_	B4DPQ0	-0.180891	0.180891	0.0185913	0.0116183	174	B4DPQ0	C1R	Complement C1r subcomponent	B4DPQ0_HUMAN	1	-11.7842	0.882158	Dengue	QC	NaN	NaN	NaN	59.7847	0.0886352
Dengue / QC	_NSLYLQM[Oxidation (M)]NSLR_	P01782	-0.158329	0.158329	0.297507	0.118961	154	P01782	IGHV3-9	Immunoglobulin heavy variable 3-9	HV309_HUMAN	1	-10.3938	0.896062	Dengue	QC	NaN	NaN	NaN	60.0582	0.203733
Dengue / QC	_AFDIC[Carbamidomethyl (C)]PLVK_	P01031	-0.277028	0.277028	0.00474332	0.00355672	170	P01031	C5	Complement C5	CO5_HUMAN	1	-17.4711	0.825289	Dengue	QC	NaN	NaN	NaN	74.3735	0.0734891
Dengue / QC	_TVGSDTFYSFK_	P01042	-0.211327	0.211327	0.000806511	0.000749488	174	P01042	KNG1	Kininogen-1	KNG1_HUMAN	1	-13.6258	0.863742	Dengue	QC	NaN	NaN	NaN	61.8917	0.0606041
Dengue / QC	_SDDKVTLEERLDK_	P01024	-0.182149	0.182149	0.0416813	0.0232773	176	P01024	C3	Complement C3	CO3_HUMAN	1	-11.8611	0.881389	Dengue	QC	NaN	NaN	NaN	50.703	0.10209
Dengue / QC	_NILTSNNIDVK_	P05090	-0.228367	0.228367	0.0121914	0.00806206	166	P05090	APOD	Apolipoprotein D	APOD_HUMAN	1	-14.6399	0.853601	Dengue	QC	NaN	NaN	NaN	81.0789	0.0831305
Dengue / QC	_EDVYVVGTVLR_	P04003	-0.307671	0.307671	0.0489123	0.0266251	164	P04003	C4BPA	C4b-binding protein alpha chain	C4BPA_HUMAN	1	-19.2055	0.807945	Dengue	QC	NaN	NaN	NaN	59.3736	0.10597
Dengue / QC	_ASQGISNYLAWYQQKPGK_	A0A075B6S5	-0.1055	0.1055	0.639921	0.21856	106	A0A075B6S5	IGKV1-27	Immunoglobulin kappa variable 1-27	KV127_HUMAN	1	-7.05171	0.929483	Dengue	QC	NaN	NaN	NaN	30.2026	0.449741
Dengue / QC	_SEYGAALAWEK_	P13671	-0.24961	0.24961	0.00372256	0.00287809	144	P13671	C6	Complement component C6	CO6_HUMAN	1	-15.8876	0.841124	Dengue	QC	NaN	NaN	NaN	51.6305	0.0698738
Dengue / QC	_SELEEQLTPVAEETR_	P02649	-0.220063	0.220063	0.0581318	0.0307049	160	P02649	APOE	Apolipoprotein E	APOE_HUMAN	1	-14.1472	0.858528	Dengue	QC	NaN	NaN	NaN	87.3757	0.110388
Dengue / QC	_VTYDVSRDK_	P19827	-0.0974107	0.0974107	0.351932	0.13586	22	P19827	ITIH1	Inter-alpha-trypsin inhibitor heavy chain H1	ITIH1_HUMAN	1	-6.52909	0.934709	Dengue	QC	NaN	NaN	NaN	6.38163	0.210879
Dengue / QC	_LLETEC[Carbamidomethyl (C)]PQYIR_	P05109	-0.161535	0.161535	0.246807	0.101925	156	P05109	S100A8	Protein S100-A8	S10A8_HUMAN	1	-10.5927	0.894073	Dengue	QC	NaN	NaN	NaN	132.464	0.18188
Dengue / QC	_TTPPMLDSDGSFFLYSK_	P01859	-0.248533	0.248533	0.00947955	0.00648222	176	P01859	IGHG2	Immunoglobulin heavy constant gamma 2	IGHG2_HUMAN	1	-15.8248	0.841752	Dengue	QC	NaN	NaN	NaN	107.416	0.0800036
Dengue / QC	_LPAPELK_	Q68DL7	-0.147931	0.147931	0.15068	0.0680384	160	Q68DL7	C18orf63	Uncharacterized protein C18orf63	CR063_HUMAN	1	-9.74559	0.902544	Dengue	QC	NaN	NaN	NaN	36.0417	0.143848
Dengue / QC	_TINVPLR_	D6R934;P02746	-0.208405	0.208405	0.00848998	0.00589426	120	D6R934;P02746	C1QB	Complement C1q subcomponent subunit B	D6R934_HUMAN;C1QB_HUMAN	1	-13.4506	0.865494	Dengue	QC	NaN	NaN	NaN	42.5896	0.0764504
Dengue / QC	_TAKDALSSVQESQVAQQAR_	B0YIW2;P02656	-0.159366	0.159366	0.0942948	0.0462604	172	B0YIW2;P02656	APOC3	Apolipoprotein C-III	B0YIW2_HUMAN;APOC3_HUMAN	1	-10.4582	0.895418	Dengue	QC	NaN	NaN	NaN	48.3333	0.123327
Dengue / QC	_TGAQELLR_	P06396	-0.2142	0.2142	0.0121323	0.008027	158	P06396	GSN	Gelsolin	GELS_HUMAN	1	-13.7976	0.862024	Dengue	QC	NaN	NaN	NaN	66.0652	0.0815379
Dengue / QC	_AKMGNFPWQVFTNIHGR_	B4DPQ0	-0.225321	0.225321	0.03723	0.021107	158	B4DPQ0	C1R	Complement C1r subcomponent	B4DPQ0_HUMAN	1	-14.4596	0.855404	Dengue	QC	NaN	NaN	NaN	46.1054	0.0979414
Dengue / QC	_LDTEDKLR_	P01019	-0.328062	0.328062	0.290937	0.116755	100	P01019	AGT	Angiotensinogen	ANGT_HUMAN	1	-20.3394	0.796606	Dengue	QC	NaN	NaN	NaN	39.0037	0.196219
Dengue / QC	_NLNEKDYELLC[Carbamidomethyl (C)]LDGTR_	P02787	-0.133179	0.133179	0.21006	0.0892655	176	P02787	TF	Serotransferrin	TRFE_HUMAN	1	-8.81798	0.91182	Dengue	QC	NaN	NaN	NaN	43.061	0.164926
Dengue / QC	_YEIVVEAR_	P33151	-0.313172	0.313172	0.270064	0.110024	44	P33151	CDH5	Cadherin-5	CADH5_HUMAN	1	-19.513	0.80487	Dengue	QC	NaN	NaN	NaN	13.8017	0.182603
Dengue / QC	_ITGKWFYIASAFR_	P19652	-0.223412	0.223412	0.0124532	0.00821291	132	P19652	ORM2	Alpha-1-acid glycoprotein 2	A1AG2_HUMAN	1	-14.3463	0.856537	Dengue	QC	NaN	NaN	NaN	82.1898	0.0820984
Dengue / QC	_QVGSGVTTDQVQAEAKESGPTTYK_	P01871	-0.213489	0.213489	0.0990149	0.0481676	160	P01871	IGHM	Immunoglobulin heavy constant mu	IGHM_HUMAN	1	-13.7551	0.862449	Dengue	QC	NaN	NaN	NaN	96.1798	0.125751
Dengue / QC	_SASDLTWDNLK_	P02787	-0.146297	0.146297	0.0297297	0.0173571	176	P02787	TF	Serotransferrin	TRFE_HUMAN	1	-9.6433	0.903567	Dengue	QC	NaN	NaN	NaN	54.3209	0.0935791
Dengue / QC	_LYYGDDEK_	P07357	-0.150728	0.150728	0.0224119	0.0136699	170	P07357	C8A	Complement component C8 alpha chain	CO8A_HUMAN	1	-9.92039	0.900796	Dengue	QC	NaN	NaN	NaN	58.1491	0.0890493
Dengue / QC	_DNSKNTLYLQMNNLR_	A0A0C4DH36	-0.156197	0.156197	0.0213766	0.0131077	140	A0A0C4DH36	IGHV3-38	Immunoglobulin heavy variable 3-38 (non-functional) (Fragment)	A0A0C4DH36_HUMAN	1	-10.2613	0.897387	Dengue	QC	NaN	NaN	NaN	87.1354	0.0891302
Dengue / QC	_LESEETM[Oxidation (M)]VLEAHDAQGDVPVTVTVHDFPGK_	P01024	-0.0024664	0.0024664	0.364166	0.13971	152	P01024	C3	Complement C3	CO3_HUMAN	1	-0.170811	0.998292	Dengue	QC	NaN	NaN	NaN	43.4536	0.227152
Dengue / QC	_DFVQPPTK_	P01042	-0.181617	0.181617	0.0115211	0.0076834	148	P01042	KNG1	Kininogen-1	KNG1_HUMAN	1	-11.8286	0.881714	Dengue	QC	NaN	NaN	NaN	82.1128	0.0805681
Dengue / QC	_NM[Oxidation (M)]ATRPYSIHAHGVQTESSTVTPTLPGETLTYVWK_	P00450	-0.312244	0.312244	0.159433	0.0712679	132	P00450	CP	Ceruloplasmin	CERU_HUMAN	1	-19.4612	0.805388	Dengue	QC	NaN	NaN	NaN	54.1146	0.145882
Dengue / QC	_EQLGEFYEALDC[Carbamidomethyl (C)]LC[Carbamidomethyl (C)]IPR_	P19652	0.0246336	0.0246336	0.187792	0.0814154	176	P19652	ORM2	Alpha-1-acid glycoprotein 2	A1AG2_HUMAN	1	1.72213	1.01722	Dengue	QC	NaN	NaN	NaN	35.3722	0.154782
Dengue / QC	_KYVLPNFEVK_	P0C0L5	-0.20658	0.20658	0.00257934	0.00208969	176	P0C0L5	C4B	Complement C4-B	CO4B_HUMAN	1	-13.3411	0.866589	Dengue	QC	NaN	NaN	NaN	70.8639	0.0664326
Dengue / QC	_QTQVSVLPEGGETPLFK_	P06396	-0.332339	0.332339	0.181375	0.0791508	170	P06396	GSN	Gelsolin	GELS_HUMAN	1	-20.5752	0.794248	Dengue	QC	NaN	NaN	NaN	39.8997	0.152498
Dengue / QC	_DNEDFQESNR_	P00450	-0.214602	0.214602	0.0556595	0.0296	104	P00450	CP	Ceruloplasmin	CERU_HUMAN	1	-13.8216	0.861784	Dengue	QC	NaN	NaN	NaN	38.7719	0.105085
Dengue / QC	_C[Carbamidomethyl (C)]IEGTC[Carbamidomethyl (C)]VC[Carbamidomethyl (C)]K_	E7ETH0;G3XAM2;P05156	-0.286929	0.286929	0.192283	0.0829266	124	E7ETH0;G3XAM2;P05156	CFI	Complement factor I	E7ETH0_HUMAN;G3XAM2_HUMAN;CFAI_HUMAN	1	-18.0355	0.819645	Dengue	QC	NaN	NaN	NaN	26.9564	0.154995
Dengue / QC	_PC[Carbamidomethyl (C)]FSALEVDETYVPK_	P02768	-0.212598	0.212598	0.0840834	0.0419762	176	P02768	ALB	Serum albumin	ALBU_HUMAN	1	-13.7018	0.862982	Dengue	QC	NaN	NaN	NaN	54.0139	0.117739
Dengue / QC	_LIC[Carbamidomethyl (C)]QATGFSPR_	P01871	-0.194434	0.194434	0.123144	0.0576365	176	P01871	IGHM	Immunoglobulin heavy constant mu	IGHM_HUMAN	1	-12.6084	0.873916	Dengue	QC	NaN	NaN	NaN	67.5769	0.132692
Dengue / QC	_IDRFMQAVTGWK_	P01019	-0.289949	0.289949	0.0623764	0.0325771	122	P01019	AGT	Angiotensinogen	ANGT_HUMAN	1	-18.2069	0.817931	Dengue	QC	NaN	NaN	NaN	58.4437	0.108648
Dengue / QC	_RQSEDSTFYLGER_	P00450	-0.211061	0.211061	0.0386351	0.0217636	176	P00450	CP	Ceruloplasmin	CERU_HUMAN	1	-13.6099	0.863901	Dengue	QC	NaN	NaN	NaN	59.1478	0.0974665
Dengue / QC	_KGEVLPLPEANFPSFPLPHHK_	P04196	-0.39124	0.39124	0.101252	0.0490576	142	P04196	HRG	Histidine-rich glycoprotein	HRG_HUMAN	1	-23.7526	0.762474	Dengue	QC	NaN	NaN	NaN	76.0316	0.124163
Dengue / QC	_YGGPNHHLPLPDNWK_	P15169	-0.178008	0.178008	0.0246445	0.0148155	138	P15169	CPN1	Carboxypeptidase N catalytic chain	CBPN_HUMAN	1	-11.6077	0.883923	Dengue	QC	NaN	NaN	NaN	51.1319	0.0886734
Dengue / QC	_RPDSLQHVLLPVLDR_	K7ERG9;P00746	-0.290005	0.290005	0.175599	0.0770851	154	K7ERG9;P00746	CFD	Complement factor D	K7ERG9_HUMAN;CFAD_HUMAN	1	-18.2101	0.817899	Dengue	QC	NaN	NaN	NaN	77.5216	0.150112
Dengue / QC	_AVGSGATFSHYYYMILSR_	P0C0L5	-0.153271	0.153271	0.0522086	0.0280592	162	P0C0L5	C4B	Complement C4-B	CO4B_HUMAN	1	-10.0791	0.899209	Dengue	QC	NaN	NaN	NaN	95.6753	0.104349
Dengue / QC	_ATLSC[Carbamidomethyl (C)]GASQSVSSSYLAWYQQKPGLAPR_	A0A0C4DH25	0.0590905	0.0590905	0.420597	0.156631	64	A0A0C4DH25	IGKV3D-20	Immunoglobulin kappa variable 3D-20	KVD20_HUMAN	1	4.18088	1.04181	Dengue	QC	NaN	NaN	NaN	44.8841	0.251513
Dengue / QC	_DWHGVPGQVDAAM[Oxidation (M)]AGR_	P04004	-0.0892767	0.0892767	0.105655	0.0507896	172	P04004	VTN	Vitronectin	VTNC_HUMAN	1	-6.00061	0.939994	Dengue	QC	NaN	NaN	NaN	40.3877	0.12333
Dengue / QC	_NKYGMVAQVTQTLK_	P04114	-0.181872	0.181872	0.0357317	0.0203647	168	P04114	APOB	Apolipoprotein B-100	APOB_HUMAN	1	-11.8442	0.881558	Dengue	QC	NaN	NaN	NaN	55.3133	0.0948024
Dengue / QC	_AEFQDALEK_	P0C0L5	-0.239548	0.239548	0.0133131	0.0087005	170	P0C0L5	C4B	Complement C4-B	CO4B_HUMAN	1	-15.2989	0.847011	Dengue	QC	NaN	NaN	NaN	139.782	0.0811555
Dengue / QC	_QSTLDKEL_	P04003	-0.182919	0.182919	0.0233839	0.0141668	176	P04003	C4BPA	C4b-binding protein alpha chain	C4BPA_HUMAN	1	-11.9081	0.880919	Dengue	QC	NaN	NaN	NaN	47.815	0.0868053
Dengue / QC	_QTVSWAVTPK_	P01023	-0.207098	0.207098	0.00883651	0.00610107	176	P01023	A2M	Alpha-2-macroglobulin	A2MG_HUMAN	1	-13.3722	0.866278	Dengue	QC	NaN	NaN	NaN	96.7177	0.0759785
Dengue / QC	_VKDLATVYVDVLK_	P02647	-0.318039	0.318039	0.0419736	0.0234135	176	P02647	APOA1	Apolipoprotein A-I	APOA1_HUMAN	1	-19.784	0.80216	Dengue	QC	NaN	NaN	NaN	53.165	0.0974099
Dengue / QC	_AEDLVGK_	P01024	-0.177985	0.177985	0.00115215	0.0010302	176	P01024	C3	Complement C3	CO3_HUMAN	1	-11.6063	0.883937	Dengue	QC	NaN	NaN	NaN	69.2462	0.0596718
Dengue / QC	_QLEWGLER_	P13671	-0.206897	0.206897	0.00284008	0.00227822	176	P13671	C6	Complement component C6	CO6_HUMAN	1	-13.3601	0.866399	Dengue	QC	NaN	NaN	NaN	48.724	0.0641336
Dengue / QC	_DGFFGNPRK_	P01871	-0.191109	0.191109	0.149146	0.0674428	162	P01871	IGHM	Immunoglobulin heavy constant mu	IGHM_HUMAN	1	-12.4068	0.875932	Dengue	QC	NaN	NaN	NaN	128.495	0.138868
Dengue / QC	_FAHYVVTSQVVNTANEAR_	P19827	-0.144895	0.144895	0.108418	0.0518543	176	P19827	ITIH1	Inter-alpha-trypsin inhibitor heavy chain H1	ITIH1_HUMAN	1	-9.55546	0.904445	Dengue	QC	NaN	NaN	NaN	39.8649	0.122569
Dengue / QC	_HQQTVTIPPK_	P01024	-0.165226	0.165226	0.107549	0.0514986	176	P01024	C3	Complement C3	CO3_HUMAN	1	-10.8211	0.891789	Dengue	QC	NaN	NaN	NaN	71.534	0.122735
Dengue / QC	_YGFIEGHVVIPR_	H0Y2P0;H0Y5E4;H0YCV9;H0YDW7;H0YDX6;P16070;P16070-10;P16070-11;P16070-12;P16070-13;P16070-14;P16070-15;P16070-16;P16070-17;P16070-18;P16070-3;P16070-4;P16070-5;P16070-6;P16070-7;P16070-8;P16070-9	-0.176068	0.176068	0.00204117	0.00170615	148	H0Y2P0;H0Y5E4;H0YCV9;H0YDW7;H0YDX6;P16070;P16070-10;P16070-11;P16070-12;P16070-13;P16070-14;P16070-15;P16070-16;P16070-17;P16070-18;P16070-3;P16070-4;P16070-5;P16070-6;P16070-7;P16070-8;P16070-9	CD44	CD44 antigen (Fragment);CD44 antigen (Fragment);CD44 antigen (Fragment);CD44 antigen (Fragment);CD44 antigen (Fragment);CD44 antigen;Isoform 10 of CD44 antigen;Isoform 11 of CD44 antigen;Isoform 12 of CD44 antigen;Isoform 13 of CD44 antigen;Isoform 14 of CD44 antigen;Isoform 15 of CD44 antigen;Isoform 16 of CD44 antigen;Isoform 17 of CD44 antigen;Isoform 18 of CD44 antigen;Isoform 3 of CD44 antig…	H0Y2P0_HUMAN;H0Y5E4_HUMAN;H0YCV9_HUMAN;H0YDW7_HUMAN;H0YDX6_HUMAN;CD44_HUMAN;CD44_HUMAN;CD44_HUMAN;CD44_HUMAN;CD44_HUMAN;CD44_HUMAN;CD44_HUMAN;CD44_HUMAN;CD44_HUMAN;CD44_HUMAN;CD44_HUMAN;CD44_HUMAN;CD44_HUMAN;CD44_HUMAN;CD44_HUMAN;CD44_HUMAN;CD44_HUMAN	1	-11.4888	0.885112	Dengue	QC	NaN	NaN	NaN	57.0732	0.0618797
Dengue / QC	_NILDRQDPPSVVVTSHQAPGEK_	P25311	-0.173691	0.173691	0.00616702	0.00447537	176	P25311	AZGP1	Zinc-alpha-2-glycoprotein	ZA2G_HUMAN	1	-11.3428	0.886572	Dengue	QC	NaN	NaN	NaN	63.7693	0.0705917
Dengue / QC	_TEHPFTVEEFVLPK_	P01023	-0.342085	0.342085	0.0529151	0.0283724	176	P01023	A2M	Alpha-2-macroglobulin	A2MG_HUMAN	1	-21.1099	0.788901	Dengue	QC	NaN	NaN	NaN	71.6384	0.101437
Dengue / QC	_QLVEIEK_	P00738	-0.222607	0.222607	0.027611	0.0162899	176	P00738	HP	Haptoglobin	HPT_HUMAN	1	-14.2985	0.857015	Dengue	QC	NaN	NaN	NaN	98.5577	0.0891287
Dengue / QC	_AGAEPASEREVS_	P01042-2	-0.172499	0.172499	0.109412	0.052269	172	P01042-2	KNG1	Isoform LMW of Kininogen-1	KNG1_HUMAN	1	-11.2695	0.887305	Dengue	QC	NaN	NaN	NaN	30.9705	0.120649
Dengue / QC	_IVQLIQDTR_	P15169	-0.134207	0.134207	0.0225395	0.0137338	134	P15169	CPN1	Carboxypeptidase N catalytic chain	CBPN_HUMAN	1	-8.88293	0.911171	Dengue	QC	NaN	NaN	NaN	68.9935	0.0851875
Dengue / QC	_IPIEDGSGEVVLSRK_	P01024	-0.024081	0.024081	0.132816	0.0613177	176	P01024	C3	Complement C3	CO3_HUMAN	1	-1.65532	0.983447	Dengue	QC	NaN	NaN	NaN	32.9018	0.128254
Dengue / QC	_LDEVKEQVAEVR_	P02649	-0.230874	0.230874	0.0515189	0.0277557	84	P02649	APOE	Apolipoprotein E	APOE_HUMAN	1	-14.7882	0.852118	Dengue	QC	NaN	NaN	NaN	43.2756	0.0986423
Dengue / QC	_GEC[Carbamidomethyl (C)]VPGEQEPEPILIPR_	P02760	-0.209778	0.209778	0.0612481	0.0320749	174	P02760	AMBP	Protein AMBP	AMBP_HUMAN	1	-13.533	0.86467	Dengue	QC	NaN	NaN	NaN	105.552	0.104176
Dengue / QC	_EQAPHC[Carbamidomethyl (C)]IC[Carbamidomethyl (C)]ANGR_	P01023	0.143065	0.143065	0.0875926	0.0434574	172	P01023	A2M	Alpha-2-macroglobulin	A2MG_HUMAN	1	10.4248	1.10425	Dengue	QC	NaN	NaN	NaN	51.5862	0.112906
Dengue / QC	_C[Carbamidomethyl (C)]PAPVSFENGIYTPR_	P06681	-0.183688	0.183688	0.0303564	0.01768	144	P06681	C2	Complement C2	CO2_HUMAN	1	-11.9551	0.880449	Dengue	QC	NaN	NaN	NaN	48.5766	0.0880706
Dengue / QC	_M[Oxidation (M)]GNFPWQVFTNIHGR_	B4DPQ0	0.0352447	0.0352447	0.494322	0.177841	160	B4DPQ0	C1R	Complement C1r subcomponent	B4DPQ0_HUMAN	1	2.47306	1.02473	Dengue	QC	NaN	NaN	NaN	29.3766	0.282822
Dengue / QC	_LFGPDLK_	P08697	-0.21559	0.21559	0.0168746	0.0106656	172	P08697	SERPINF2	Alpha-2-antiplasmin	A2AP_HUMAN	1	-13.8806	0.861194	Dengue	QC	NaN	NaN	NaN	43.6907	0.0787234
Dengue / QC	_VHVSEEGTEPEAMLQVLGPKPALPAGTEDTAKEDAANR_	P06396	-0.258704	0.258704	0.0720937	0.0368222	160	P06396	GSN	Gelsolin	GELS_HUMAN	1	-16.4162	0.835838	Dengue	QC	NaN	NaN	NaN	42.9305	0.10604
Dengue / QC	_TTGGKDEEVVQC[Carbamidomethyl (C)]LSDGWSSQPTC[Carbamidomethyl (C)]R_	P05160	-0.122652	0.122652	0.0131726	0.00862137	88	P05160	F13B	Coagulation factor XIII B chain	F13B_HUMAN	1	-8.15022	0.918498	Dengue	QC	NaN	NaN	NaN	64.4533	0.0765944
Dengue / QC	_KFYNQVSTPLLR_	P19823	-0.11258	0.11258	0.0229053	0.0139134	152	P19823	ITIH2	Inter-alpha-trypsin inhibitor heavy chain H2	ITIH2_HUMAN	1	-7.50674	0.924933	Dengue	QC	NaN	NaN	NaN	47.7098	0.0830412
Dengue / QC	_TIYTPGSTVLYR_	P01024	-0.213544	0.213544	0.0277499	0.0163585	176	P01024	C3	Complement C3	CO3_HUMAN	1	-13.7584	0.862416	Dengue	QC	NaN	NaN	NaN	87.5612	0.0870108
Dengue / QC	_RIPIEDGSGEVVLSR_	P01024	-0.197004	0.197004	0.0743475	0.0377727	176	P01024	C3	Complement C3	CO3_HUMAN	1	-12.764	0.87236	Dengue	QC	NaN	NaN	NaN	58.5581	0.107042
Dengue / QC	_ADGSYAAWLSR_	P0C0L5	-0.218352	0.218352	0.0255849	0.0152789	156	P0C0L5	C4B	Complement C4-B	CO4B_HUMAN	1	-14.0453	0.859547	Dengue	QC	NaN	NaN	NaN	110.514	0.0858185
Dengue / QC	_KLKEGMLSIMSYR_	P01031	-0.35651	0.35651	0.366782	0.140545	72	P01031	C5	Complement C5	CO5_HUMAN	1	-21.8948	0.781052	Dengue	QC	NaN	NaN	NaN	13.5529	0.207147
Dengue / QC	_DKLAAC[Carbamidomethyl (C)]LEGNC[Carbamidomethyl (C)]AEGLGTNYR_	P00734	-0.189797	0.189797	0.0951982	0.0466293	176	P00734	F2	Prothrombin	THRB_HUMAN	1	-12.3271	0.876729	Dengue	QC	NaN	NaN	NaN	43.6696	0.113305
Dengue / QC	_YLTWASR_	A0A0G2JMB2	-0.275206	0.275206	0.059799	0.0314531	170	A0A0G2JMB2	IGHA2	Immunoglobulin heavy constant alpha 2 (Fragment)	A0A0G2JMB2_HUMAN	1	-17.3668	0.826332	Dengue	QC	NaN	NaN	NaN	98.2202	0.101381
Dengue / QC	_TYETTLEK_	P02768	-0.190775	0.190775	0.0420529	0.0234456	176	P02768	ALB	Serum albumin	ALBU_HUMAN	1	-12.3865	0.876135	Dengue	QC	NaN	NaN	NaN	47.99	0.0923545
Dengue / QC	_SLDFTELDVAAEK_	P01019	-0.285571	0.285571	0.150192	0.0678413	156	P01019	AGT	Angiotensinogen	ANGT_HUMAN	1	-17.9583	0.820417	Dengue	QC	NaN	NaN	NaN	74.7282	0.132568
Dengue / QC	_TITKLSFVKVDSHFR_	P01023	-0.0826699	0.0826699	0.302662	0.120613	156	P01023	A2M	Alpha-2-macroglobulin	A2MG_HUMAN	1	-5.56915	0.944308	Dengue	QC	NaN	NaN	NaN	64.0958	0.185439
Dengue / QC	_YYPYQSFQTPQHPSFLFQDKR_	Q08380	-0.234664	0.234664	0.203622	0.0869907	114	Q08380	LGALS3BP	Galectin-3-binding protein	LG3BP_HUMAN	1	-15.0117	0.849883	Dengue	QC	NaN	NaN	NaN	60.9336	0.149917
Dengue / QC	_NNANGVDLNR_	P15169	-0.177577	0.177577	0.182669	0.0796074	112	P15169	CPN1	Carboxypeptidase N catalytic chain	CBPN_HUMAN	1	-11.5814	0.884186	Dengue	QC	NaN	NaN	NaN	38.1467	0.141708
Dengue / QC	_DPTFIPAPIQAK_	P01019	-0.204988	0.204988	0.0359613	0.0204793	174	P01019	AGT	Angiotensinogen	ANGT_HUMAN	1	-13.2454	0.867546	Dengue	QC	NaN	NaN	NaN	118.258	0.0906078
Dengue / QC	_QLNEINYEDHK_	B4E1Z4	-0.158977	0.158977	0.0397578	0.0223176	176	B4E1Z4	NaN	cDNA FLJ55673, highly similar to Complement factor B (EC 3.4.21.47)	B4E1Z4_HUMAN	1	-10.434	0.89566	Dengue	QC	NaN	NaN	NaN	49.5114	0.0909856
Dengue / QC	_WQSIPLC[Carbamidomethyl (C)]VEK_	P08603	-0.173851	0.173851	0.000928884	0.000849392	176	P08603	CFH	Complement factor H	CFAH_HUMAN	1	-11.3527	0.886473	Dengue	QC	NaN	NaN	NaN	57.8377	0.054937
Dengue / QC	_VEYGFQVK_	P0C0L5	-0.180626	0.180626	0.00173799	0.0014793	176	P0C0L5	C4B	Complement C4-B	CO4B_HUMAN	1	-11.768	0.88232	Dengue	QC	NaN	NaN	NaN	78.884	0.0590887
Dengue / QC	_KFPSGTFEQVSQLVK_	P02774;P02774-3	-0.260102	0.260102	0.0515433	0.027762	176	P02774;P02774-3	GC	Vitamin D-binding protein;Isoform 3 of Vitamin D-binding protein	VTDB_HUMAN	1	-16.4971	0.835029	Dengue	QC	NaN	NaN	NaN	40.33	0.0954642
Dengue / QC	_LGSLGAAC[Carbamidomethyl (C)]EQTQTEGAK_	P07357	-0.164998	0.164998	0.116593	0.0551199	174	P07357	C8A	Complement component C8 alpha chain	CO8A_HUMAN	1	-10.807	0.89193	Dengue	QC	NaN	NaN	NaN	49.1783	0.119858
Dengue / QC	_IAELSATAQEIIK_	P04114	-0.356301	0.356301	0.348062	0.134642	106	P04114	APOB	Apolipoprotein B-100	APOB_HUMAN	1	-21.8835	0.781165	Dengue	QC	NaN	NaN	NaN	14.9604	0.197529
Dengue / QC	_YIFHNFMER_	Q14624	-0.20094	0.20094	0.0442142	0.0244645	132	Q14624	ITIH4	Inter-alpha-trypsin inhibitor heavy chain H4	ITIH4_HUMAN	1	-13.0017	0.869983	Dengue	QC	NaN	NaN	NaN	86.9264	0.093127
Dengue / QC	_LEDSVTYHC[Carbamidomethyl (C)]SR_	B4E1Z4	-0.21046	0.21046	0.0976269	0.0476168	176	B4E1Z4	NaN	cDNA FLJ55673, highly similar to Complement factor B (EC 3.4.21.47)	B4E1Z4_HUMAN	1	-13.5738	0.864262	Dengue	QC	NaN	NaN	NaN	48.2092	0.112488
Dengue / QC	_LSSPAVITDK_	P00747	-0.181306	0.181306	0.0383365	0.0216334	176	P00747	PLG	Plasminogen	PLMN_HUMAN	1	-11.8096	0.881904	Dengue	QC	NaN	NaN	NaN	63.5582	0.0898043
Dengue / QC	_VNKDDEEFIESNKMHAINGR_	P00450	-0.0721696	0.0721696	0.0707384	0.0362332	170	P00450	CP	Ceruloplasmin	CERU_HUMAN	1	-4.87935	0.951206	Dengue	QC	NaN	NaN	NaN	52.6059	0.102838
Dengue / QC	_VLATLC[Carbamidomethyl (C)]GQESTDTER_	O00187	-0.13512	0.13512	0.513911	0.183494	22	O00187	MASP2	Mannan-binding lectin serine protease 2	MASP2_HUMAN	1	-8.94059	0.910594	Dengue	QC	NaN	NaN	NaN	4.00513	0.265181
Dengue / QC	_AIDEDC[Carbamidomethyl (C)]SQYEPIPGSQK_	P07357	-0.174146	0.174146	0.0481007	0.02625	164	P07357	C8A	Complement component C8 alpha chain	CO8A_HUMAN	1	-11.3708	0.886292	Dengue	QC	NaN	NaN	NaN	54.9476	0.0937506
Dengue / QC	_SKLIC[Carbamidomethyl (C)]QATGFSPR_	P01871	-0.136747	0.136747	0.203602	0.0869887	176	P01871	IGHM	Immunoglobulin heavy constant mu	IGHM_HUMAN	1	-9.04323	0.909568	Dengue	QC	NaN	NaN	NaN	115.087	0.147884
Dengue / QC	_TRDDEPVC[Carbamidomethyl (C)]GRPLGIR_	H0Y512;Q9HDC9	-0.0407797	0.0407797	0.291098	0.116803	60	H0Y512;Q9HDC9	APMAP	Adipocyte plasma membrane-associated protein (Fragment);Adipocyte plasma membrane-associated protein	H0Y512_HUMAN;APMAP_HUMAN	1	-2.78706	0.972129	Dengue	QC	NaN	NaN	NaN	15.4443	0.172871
Dengue / QC	_LRTEGDGVYTLNNEK_	P00738	-0.098997	0.098997	0.241742	0.100205	172	P00738	HP	Haptoglobin	HPT_HUMAN	1	-6.63181	0.933682	Dengue	QC	NaN	NaN	NaN	80.3348	0.160143
Dengue / QC	_QC[Carbamidomethyl (C)]VPTEPC[Carbamidomethyl (C)]EDAEDDC[Carbamidomethyl (C)]GNDFQC[Carbamidomethyl (C)]STGR_	P02748	-0.0985665	0.0985665	0.27435	0.111518	176	P02748	C9	Complement component C9	CO9_HUMAN	1	-6.60395	0.933961	Dengue	QC	NaN	NaN	NaN	44.4439	0.170371
Dengue / QC	_IAPQLSTEELVSLGEK_	P43652	-0.253971	0.253971	0.159457	0.0712731	156	P43652	AFM	Afamin	AFAM_HUMAN	1	-16.1415	0.838585	Dengue	QC	NaN	NaN	NaN	51.0551	0.131841
Dengue / QC	_SETKDLLFR_	P02787	-0.16427	0.16427	0.0103532	0.0070041	176	P02787	TF	Serotransferrin	TRFE_HUMAN	1	-10.762	0.89238	Dengue	QC	NaN	NaN	NaN	48.1865	0.0704038
Dengue / QC	_KLVLSSEK_	P01024	-0.0541037	0.0541037	0.145795	0.0662289	152	P01024	C3	Complement C3	CO3_HUMAN	1	-3.68073	0.963193	Dengue	QC	NaN	NaN	NaN	57.4212	0.127104
Dengue / QC	_LLSGGNTLHLVSTTK_	P04114	-0.179407	0.179407	0.0429984	0.0239018	176	P04114	APOB	Apolipoprotein B-100	APOB_HUMAN	1	-11.6934	0.883066	Dengue	QC	NaN	NaN	NaN	74.1183	0.090972
Dengue / QC	_TMSGLEC[Carbamidomethyl (C)]QAWDSQSPHAHGYIPSKFPNK_	P00747	-0.191033	0.191033	0.00370514	0.0028677	166	P00747	PLG	Plasminogen	PLMN_HUMAN	1	-12.4022	0.875978	Dengue	QC	NaN	NaN	NaN	77.3078	0.0625501
Dengue / QC	_YYYDGKDYIEFNK_	P25311	-0.143299	0.143299	0.038562	0.0217295	170	P25311	AZGP1	Zinc-alpha-2-glycoprotein	ZA2G_HUMAN	1	-9.45539	0.905446	Dengue	QC	NaN	NaN	NaN	54.5928	0.08819
Dengue / QC	_ASQGISNYLAWFQQKPGKAPK_	P04430	-0.173576	0.173576	0.283915	0.114695	130	P04430	IGKV1-16	Immunoglobulin kappa variable 1-16	KV116_HUMAN	1	-11.3358	0.886642	Dengue	QC	NaN	NaN	NaN	29.5577	0.170935
Dengue / QC	_INHGILYDEEK_	Q03591	-0.166524	0.166524	0.115672	0.0547492	158	Q03591	CFHR1	Complement factor H-related protein 1	FHR1_HUMAN	1	-10.9013	0.890987	Dengue	QC	NaN	NaN	NaN	58.2592	0.116808
Dengue / QC	_YGLDSDLSC[Carbamidomethyl (C)]K_	P36955	-0.125678	0.125678	0.0107167	0.00721448	176	P36955	SERPINF1	Pigment epithelium-derived factor	PEDF_HUMAN	1	-8.34268	0.916573	Dengue	QC	NaN	NaN	NaN	57.1441	0.0705976
Dengue / QC	_SC[Carbamidomethyl (C)]GLHQLLR_	P0C0L5	-0.18627	0.18627	0.0489971	0.026656	172	P0C0L5	C4B	Complement C4-B	CO4B_HUMAN	1	-12.1125	0.878875	Dengue	QC	NaN	NaN	NaN	88.2212	0.0931014
Dengue / QC	_SSGLVSNAPGVQIR_	P04180	-0.212906	0.212906	0.00803586	0.00561819	150	P04180	LCAT	Phosphatidylcholine-sterol acyltransferase	LCAT_HUMAN	1	-13.7202	0.862798	Dengue	QC	NaN	NaN	NaN	66.4642	0.0679634
Dengue / QC	_ADVQAHGEGQEFSITC[Carbamidomethyl (C)]LVDEEEMKK_	P19827	-0.212433	0.212433	0.127688	0.0593059	176	P19827	ITIH1	Inter-alpha-trypsin inhibitor heavy chain H1	ITIH1_HUMAN	1	-13.692	0.86308	Dengue	QC	NaN	NaN	NaN	43.696	0.119525
Dengue / QC	_KGDTFSC[Carbamidomethyl (C)]MVGHEALPLAFTQK_	A0A0G2JMB2	-0.236011	0.236011	0.178653	0.0781757	176	A0A0G2JMB2	IGHA2	Immunoglobulin heavy constant alpha 2 (Fragment)	A0A0G2JMB2_HUMAN	1	-15.091	0.84909	Dengue	QC	NaN	NaN	NaN	99.8683	0.136867
Dengue / QC	_IDVHWTR_	P25311	-0.1044	0.1044	0.0842433	0.042043	174	P25311	AZGP1	Zinc-alpha-2-glycoprotein	ZA2G_HUMAN	1	-6.98086	0.930191	Dengue	QC	NaN	NaN	NaN	48.9697	0.10509
Dengue / QC	_ITC[Carbamidomethyl (C)]SGDVLAK_	P01718	-0.228626	0.228626	0.060015	0.0315523	132	P01718	IGLV3-27	Immunoglobulin lambda variable 3-27	LV327_HUMAN	1	-14.6553	0.853447	Dengue	QC	NaN	NaN	NaN	92.4612	0.0970719
Dengue / QC	_ISLPESLK_	P01024	-0.179254	0.179254	0.0132527	0.00866689	176	P01024	C3	Complement C3	CO3_HUMAN	1	-11.684	0.88316	Dengue	QC	NaN	NaN	NaN	56.409	0.0720842
Dengue / QC	_EAGIPEFYDYDVALIK_	B4E1Z4	-0.144502	0.144502	0.0684718	0.0352123	174	B4E1Z4	NaN	cDNA FLJ55673, highly similar to Complement factor B (EC 3.4.21.47)	B4E1Z4_HUMAN	1	-9.53084	0.904692	Dengue	QC	NaN	NaN	NaN	96.8623	0.100059
Dengue / QC	_ALMDETMK_	P02649	-0.220043	0.220043	0.188853	0.0817833	64	P02649	APOE	Apolipoprotein E	APOE_HUMAN	1	-14.146	0.85854	Dengue	QC	NaN	NaN	NaN	18.936	0.135157
Dengue / QC	_GQGTLSVVTM[Oxidation (M)]YHAK_	P01024	-0.00846191	0.00846191	0.0930482	0.0457354	150	P01024	C3	Complement C3	CO3_HUMAN	1	-0.584818	0.994152	Dengue	QC	NaN	NaN	NaN	66.2864	0.107862
Dengue / QC	_AIEDYINEFSVRK_	P02748	-0.183097	0.183097	0.209069	0.0889096	164	P02748	C9	Complement component C9	CO9_HUMAN	1	-11.919	0.88081	Dengue	QC	NaN	NaN	NaN	53.9638	0.144486
Dengue / QC	_EVSFDVELPK_	Q06033;Q06033-2	-0.216768	0.216768	0.0506421	0.0273575	176	Q06033;Q06033-2	ITIH3	Inter-alpha-trypsin inhibitor heavy chain H3;Isoform 2 of Inter-alpha-trypsin inhibitor heavy chain H3	ITIH3_HUMAN	1	-13.9509	0.860491	Dengue	QC	NaN	NaN	NaN	81.4554	0.092492
Dengue / QC	_MSTHARPIC[Carbamidomethyl (C)]LPC[Carbamidomethyl (C)]TMEANLALR_	B4E1Z4	-0.131542	0.131542	0.0602353	0.0316508	158	B4E1Z4	NaN	cDNA FLJ55673, highly similar to Complement factor B (EC 3.4.21.47)	B4E1Z4_HUMAN	1	-8.71449	0.912855	Dengue	QC	NaN	NaN	NaN	49.5133	0.095394
Dengue / QC	_EM[Oxidation (M)]SGSPASGIPVK_	P0C0L5	-0.162768	0.162768	0.0986665	0.0480305	158	P0C0L5	C4B	Complement C4-B	CO4B_HUMAN	1	-10.6691	0.893309	Dengue	QC	NaN	NaN	NaN	52.355	0.108994
Dengue / QC	_LVAYYTLIGASGQR_	P01024	-0.232179	0.232179	0.0137171	0.00892929	176	P01024	C3	Complement C3	CO3_HUMAN	1	-14.8652	0.851348	Dengue	QC	NaN	NaN	NaN	71.4801	0.0724493
Dengue / QC	_LQSLFDSPDFSK_	P36955	-0.21846	0.21846	0.0257062	0.0153355	170	P36955	SERPINF1	Pigment epithelium-derived factor	PEDF_HUMAN	1	-14.0518	0.859482	Dengue	QC	NaN	NaN	NaN	81.0889	0.0801051
Dengue / QC	_NPLPSKETIEQEKQAGES_	P62328	0.0934411	0.0934411	0.285458	0.115181	48	P62328	TMSB4X	Thymosin beta-4	TYB4_HUMAN	1	6.6912	1.06691	Dengue	QC	NaN	NaN	NaN	13.2859	0.163438
Dengue / QC	_GQPLSPEKYVTSAPM[Oxidation (M)]PEPQAPGR_	P01871	-0.216308	0.216308	0.262915	0.107506	172	P01871	IGHM	Immunoglobulin heavy constant mu	IGHM_HUMAN	1	-13.9235	0.860765	Dengue	QC	NaN	NaN	NaN	135.277	0.161718
Dengue / QC	_SC[Carbamidomethyl (C)]VGETTESTQC[Carbamidomethyl (C)]EDEELEHLR_	P10643	-0.138397	0.138397	0.102891	0.0496639	176	P10643	C7	Complement component C7	CO7_HUMAN	1	-9.1472	0.908528	Dengue	QC	NaN	NaN	NaN	54.9044	0.10909
Dengue / QC	_SPPEISHGVVAHMSDSYQYGEEVTYK_	P08603	-0.170478	0.170478	0.0181109	0.011355	174	P08603	CFH	Complement factor H	CFAH_HUMAN	1	-11.1451	0.888549	Dengue	QC	NaN	NaN	NaN	72.9124	0.0748142
Dengue / QC	_KQLVEIEK_	P00738	-0.212319	0.212319	0.139588	0.0639054	160	P00738	HP	Haptoglobin	HPT_HUMAN	1	-13.6852	0.863148	Dengue	QC	NaN	NaN	NaN	91.7004	0.121273
Dengue / QC	_QEDM[Oxidation (M)]KGHFSISIPVK_	P01023	-0.0207407	0.0207407	0.453677	0.166035	76	P01023	A2M	Alpha-2-macroglobulin	A2MG_HUMAN	1	-1.42735	0.985726	Dengue	QC	NaN	NaN	NaN	61.3126	0.239407
Dengue / QC	_VYAYYNLEESC[Carbamidomethyl (C)]TR_	P01024	-0.195546	0.195546	0.182081	0.0793872	176	P01024	C3	Complement C3	CO3_HUMAN	1	-12.6758	0.873242	Dengue	QC	NaN	NaN	NaN	47.9197	0.132906
Dengue / QC	_GLEWVAFIR_	A0A0J9YY99	-0.227986	0.227986	0.204582	0.0873495	160	A0A0J9YY99	NaN	Uncharacterized protein (Fragment)	A0A0J9YY99_HUMAN	1	-14.6174	0.853826	Dengue	QC	NaN	NaN	NaN	131.61	0.141093
Dengue / QC	_AKLPDATPTELAK_	D6RF35	-0.172744	0.172744	0.061753	0.0322866	134	D6RF35	GC	Vitamin D-binding protein	D6RF35_HUMAN	1	-11.2846	0.887154	Dengue	QC	NaN	NaN	NaN	125.813	0.0953796
Dengue / QC	_ILLQGTPVAQMTEDAVDAER_	P01024	-0.136267	0.136267	0.0549189	0.0292948	176	P01024	C3	Complement C3	CO3_HUMAN	1	-9.01295	0.90987	Dengue	QC	NaN	NaN	NaN	70.3817	0.092066
Dengue / QC	_AVLDVFEEGTEASAATAVK_	P01011	-0.133981	0.133981	0.158576	0.0709454	176	P01011	SERPINA3	Alpha-1-antichymotrypsin	AACT_HUMAN	1	-8.86867	0.911313	Dengue	QC	NaN	NaN	NaN	136.558	0.126747
Dengue / QC	_TMQALPYSTVGNSNNYLHLSVLR_	P01024	-0.0726179	0.0726179	0.152146	0.068563	176	P01024	C3	Complement C3	CO3_HUMAN	1	-4.90891	0.950911	Dengue	QC	NaN	NaN	NaN	47.9585	0.123412
Dengue / QC	_HQPQEFPTYVEPTNDEIC[Carbamidomethyl (C)]EAFRK_	P02774;P02774-3	-0.200414	0.200414	0.0723166	0.0369132	176	P02774;P02774-3	GC	Vitamin D-binding protein;Isoform 3 of Vitamin D-binding protein	VTDB_HUMAN	1	-12.9699	0.870301	Dengue	QC	NaN	NaN	NaN	54.4002	0.0978813
Dengue / QC	_FRETLEDTRDR_	P04114	-0.137906	0.137906	0.288641	0.116092	114	P04114	APOB	Apolipoprotein B-100	APOB_HUMAN	1	-9.11626	0.908837	Dengue	QC	NaN	NaN	NaN	21.9939	0.164899
Dengue / QC	_SEETKENEGFTVTAEGKGQGTLSVVTMYHAK_	P01024	-0.119221	0.119221	0.185101	0.0804485	164	P01024	C3	Complement C3	CO3_HUMAN	1	-7.93153	0.920685	Dengue	QC	NaN	NaN	NaN	59.0403	0.1336
Dengue / QC	_LTLTPWVGLRK_	O75882;O75882-2;O75882-3	0.116439	0.116439	0.310956	0.123212	38	O75882;O75882-2;O75882-3	ATRN	Attractin;Isoform 2 of Attractin;Isoform 3 of Attractin	ATRN_HUMAN	1	8.40561	1.08406	Dengue	QC	NaN	NaN	NaN	11.4343	0.168849
Dengue / QC	_AIEDYINEFSVR_	P02748	-0.126479	0.126479	0.31053	0.123094	172	P02748	C9	Complement component C9	CO9_HUMAN	1	-8.39354	0.916065	Dengue	QC	NaN	NaN	NaN	46.363	0.174396
Dengue / QC	_C[Carbamidomethyl (C)]EGPIPDVTFELLR_	P04217	-0.126468	0.126468	0.396093	0.149241	174	P04217	A1BG	Alpha-1B-glycoprotein	A1BG_HUMAN	1	-8.39285	0.916072	Dengue	QC	NaN	NaN	NaN	50.6062	0.208884
Dengue / QC	_ERGHMLENHVER_	P19827	0.352575	0.352575	0.642135	0.219148	54	P19827	ITIH1	Inter-alpha-trypsin inhibitor heavy chain H1	ITIH1_HUMAN	1	27.6838	1.27684	Dengue	QC	NaN	NaN	NaN	9.07187	0.371522
Dengue / QC	_M[Oxidation (M)]GIQHAYSENADFSGLTEDNGLK_	P05543	-0.0832252	0.0832252	0.684165	0.229874	16	P05543	SERPINA7	Thyroxine-binding globulin	THBG_HUMAN	1	-5.6055	0.943945	Dengue	QC	NaN	NaN	NaN	7.04831	0.420676
Dengue / QC	_LLLQQVSLPELPGEYSM[Oxidation (M)]K_	P01023	-0.164931	0.164931	0.170355	0.0751548	164	P01023	A2M	Alpha-2-macroglobulin	A2MG_HUMAN	1	-10.8029	0.891971	Dengue	QC	NaN	NaN	NaN	85.7929	0.128977
Dengue / QC	_NLREGTC[Carbamidomethyl (C)]PEAPTDEC[Carbamidomethyl (C)]KPVK_	P02787	-0.128792	0.128792	0.171928	0.0757561	170	P02787	TF	Serotransferrin	TRFE_HUMAN	1	-8.5403	0.914597	Dengue	QC	NaN	NaN	NaN	39.7137	0.128191
Dengue / QC	_FTISRDDSK_	A0A0B4J1Y9	-0.118833	0.118833	0.0745647	0.0378697	134	A0A0B4J1Y9	IGHV3-72	Immunoglobulin heavy variable 3-72	HV372_HUMAN	1	-7.90679	0.920932	Dengue	QC	NaN	NaN	NaN	76.68	0.0986006
Dengue / QC	_YTFELSR_	P02774;P02774-3	-0.192348	0.192348	0.140409	0.0642014	176	P02774;P02774-3	GC	Vitamin D-binding protein;Isoform 3 of Vitamin D-binding protein	VTDB_HUMAN	1	-12.482	0.87518	Dengue	QC	NaN	NaN	NaN	46.3764	0.11877
Dengue / QC	_AEMADQAAAWLTR_	P0C0L5	-0.232631	0.232631	0.217058	0.0916622	134	P0C0L5	C4B	Complement C4-B	CO4B_HUMAN	1	-14.8919	0.851081	Dengue	QC	NaN	NaN	NaN	35.8995	0.141398
Dengue / QC	_FQMIPLDPK_	P07996	-0.170722	0.170722	0.0379382	0.021438	160	P07996	THBS1	Thrombospondin-1	TSP1_HUMAN	1	-11.1602	0.888398	Dengue	QC	NaN	NaN	NaN	70.8516	0.0836837
Dengue / QC	_DFHINLFQVLPWLKEK_	B4E1Z4	0.421338	0.421338	0.519358	0.18502	172	B4E1Z4	NaN	cDNA FLJ55673, highly similar to Complement factor B (EC 3.4.21.47)	B4E1Z4_HUMAN	1	33.9169	1.33917	Dengue	QC	NaN	NaN	NaN	30.0816	0.271336
Dengue / QC	_LRTSSFALNLPTLPEVKFPEVDVLTK_	P04114	0.157745	0.157745	0.668773	0.225887	28	P04114	APOB	Apolipoprotein B-100	APOB_HUMAN	1	11.5542	1.11554	Dengue	QC	NaN	NaN	NaN	2.0901	0.357556
Dengue / QC	_VC[Carbamidomethyl (C)]SQYAAYGEK_	P02774;P02774-3	-0.162568	0.162568	0.124528	0.0581659	172	P02774;P02774-3	GC	Vitamin D-binding protein;Isoform 3 of Vitamin D-binding protein	VTDB_HUMAN	1	-10.6567	0.893433	Dengue	QC	NaN	NaN	NaN	60.0266	0.113165
Dengue / QC	_TLDLGENQLETLPPDLLR_	P02750	-0.0249978	0.0249978	0.0699401	0.0358651	170	P02750	LRG1	Leucine-rich alpha-2-glycoprotein	A2GL_HUMAN	1	-1.71779	0.982822	Dengue	QC	NaN	NaN	NaN	125.885	0.0961464
Dengue / QC	_QVVAGLNFR_	P01042	-0.186105	0.186105	0.00251553	0.00204777	176	P01042	KNG1	Kininogen-1	KNG1_HUMAN	1	-12.1025	0.878975	Dengue	QC	NaN	NaN	NaN	51.3062	0.0552789
Dengue / QC	_ITQVLHFTK_	P0C0L5	-0.109797	0.109797	0.0539054	0.0288208	146	P0C0L5	C4B	Complement C4-B	CO4B_HUMAN	1	-7.32813	0.926719	Dengue	QC	NaN	NaN	NaN	108.635	0.0900036
Dengue / QC	_LMIYDVSKRPSGVPDR_	P01706	0.0186755	0.0186755	0.382224	0.145037	96	P01706	IGLV2-11	Immunoglobulin lambda variable 2-11	LV211_HUMAN	1	1.3029	1.01303	Dengue	QC	NaN	NaN	NaN	84.6512	0.199653
Dengue / QC	_SKTDGGTTDYAAPVKGR_	A0A0B4J1V0	0.0288943	0.0288943	0.482812	0.174551	96	A0A0B4J1V0	IGHV3-15	Immunoglobulin heavy variable 3-15	HV315_HUMAN	1	2.02299	1.02023	Dengue	QC	NaN	NaN	NaN	31.9015	0.246468
Dengue / QC	_VLVDHFGYTK_	P04114	-0.112411	0.112411	0.111804	0.053209	130	P04114	APOB	Apolipoprotein B-100	APOB_HUMAN	1	-7.4959	0.925041	Dengue	QC	NaN	NaN	NaN	57.1076	0.10821
Dengue / QC	_YTFVVPEDTR_	P33151	-0.139122	0.139122	0.0353908	0.0201983	142	P33151	CDH5	Cadherin-5	CADH5_HUMAN	1	-9.19287	0.908071	Dengue	QC	NaN	NaN	NaN	77.1719	0.0814849
Dengue / QC	_LGPLVEQGR_	P02649	-0.180214	0.180214	0.0698387	0.0358163	176	P02649	APOE	Apolipoprotein E	APOE_HUMAN	1	-11.7428	0.882572	Dengue	QC	NaN	NaN	NaN	54.0876	0.0938869
Dengue / QC	_WC[Carbamidomethyl (C)]AVSEHEATK_	P02787	-0.0639145	0.0639145	0.108305	0.0518089	176	P02787	TF	Serotransferrin	TRFE_HUMAN	1	-4.33352	0.956665	Dengue	QC	NaN	NaN	NaN	78.2909	0.106855
Dengue / QC	_SYYASWYQQKPGQAPVLVIYGK_	P01714	-0.380641	0.380641	0.361875	0.138986	112	P01714	IGLV3-19	Immunoglobulin lambda variable 3-19	LV319_HUMAN	1	-23.1904	0.768096	Dengue	QC	NaN	NaN	NaN	97.8602	0.189426
Dengue / QC	_ANLSSQALQM[Oxidation (M)]SLDYGFVTPLTSMSIR_	P19827	0.522831	0.522831	0.784579	0.254746	108	P19827	ITIH1	Inter-alpha-trypsin inhibitor heavy chain H1	ITIH1_HUMAN	1	43.6772	1.43677	Dengue	QC	NaN	NaN	NaN	12.7268	0.621326
Dengue / QC	_AKLHIDEMDSVPTVR_	P19320	0.985688	0.985688	0.845966	0.269276	52	P19320	VCAM1	Vascular cell adhesion protein 1	VCAM1_HUMAN	1	98.0257	1.98026	Dengue	QC	NaN	NaN	NaN	5.92201	0.853707
Dengue / QC	_FEVQVTVPK_	P01023	-0.169114	0.169114	0.023543	0.0142453	174	P01023	A2M	Alpha-2-macroglobulin	A2MG_HUMAN	1	-11.0612	0.889388	Dengue	QC	NaN	NaN	NaN	143.685	0.0751044
Dengue / QC	_EKYLTWASR_	A0A0G2JMB2	-0.146595	0.146595	0.109375	0.0522559	176	A0A0G2JMB2	IGHA2	Immunoglobulin heavy constant alpha 2 (Fragment)	A0A0G2JMB2_HUMAN	1	-9.66198	0.90338	Dengue	QC	NaN	NaN	NaN	111.935	0.106449
Dengue / QC	_YTTEIIK_	B4DPQ0	-0.0827633	0.0827633	0.0347365	0.0198839	166	B4DPQ0	C1R	Complement C1r subcomponent	B4DPQ0_HUMAN	1	-5.57527	0.944247	Dengue	QC	NaN	NaN	NaN	48.1688	0.078854
Dengue / QC	_GTEAAGAMFLEAIPMSIPPEVK_	P01009	-0.15694	0.15694	0.106475	0.0511202	176	P01009	SERPINA1	Alpha-1-antitrypsin	A1AT_HUMAN	1	-10.3075	0.896925	Dengue	QC	NaN	NaN	NaN	98.6553	0.104632
Dengue / QC	_ADRDQYELLC[Carbamidomethyl (C)]LDNTR_	P02787	-0.203011	0.203011	0.010887	0.00731376	176	P02787	TF	Serotransferrin	TRFE_HUMAN	1	-13.1264	0.868736	Dengue	QC	NaN	NaN	NaN	137.988	0.0660264
Dengue / QC	_NNEGTYYSPNYNPQSR_	P00450	-0.111718	0.111718	0.0537337	0.0287423	176	P00450	CP	Ceruloplasmin	CERU_HUMAN	1	-7.45149	0.925485	Dengue	QC	NaN	NaN	NaN	58.49	0.0864305
Dengue / QC	_NNVPC[Carbamidomethyl (C)]SPK_	P0C0L5	-0.106898	0.106898	0.050462	0.027277	176	P0C0L5	C4B	Complement C4-B	CO4B_HUMAN	1	-7.14175	0.928582	Dengue	QC	NaN	NaN	NaN	80.6884	0.085656
Dengue / QC	_VVLVAVDK_	P01024	-0.172156	0.172156	0.0328772	0.0189701	164	P01024	C3	Complement C3	CO3_HUMAN	1	-11.2485	0.887515	Dengue	QC	NaN	NaN	NaN	89.5032	0.0784398
Dengue / QC	_VPQVSTPTLVEVSR_	P02768	-0.182277	0.182277	0.00559656	0.00411575	176	P02768	ALB	Serum albumin	ALBU_HUMAN	1	-11.8689	0.881311	Dengue	QC	NaN	NaN	NaN	61.3356	0.0591807
Dengue / QC	_EALQGVGDMGR_	A0A096LPE2	-0.18125	0.18125	0.0516486	0.0278023	160	A0A096LPE2	SAA2-SAA4	SAA2-SAA4 readthrough	A0A096LPE2_HUMAN	1	-11.8061	0.881939	Dengue	QC	NaN	NaN	NaN	111.252	0.08599
Dengue / QC	_RPSGIPER_	A0A075B6K4	-0.184261	0.184261	0.207515	0.088379	162	A0A075B6K4	IGLV3-10	Immunoglobulin lambda variable 3-10	LV310_HUMAN	1	-11.99	0.8801	Dengue	QC	NaN	NaN	NaN	75.4609	0.132871
Dengue / QC	_GPEVQLVAHSPWLK_	P0C0L5	-0.161915	0.161915	0.0255943	0.0152813	162	P0C0L5	C4B	Complement C4-B	CO4B_HUMAN	1	-10.6162	0.893838	Dengue	QC	NaN	NaN	NaN	147.635	0.0748665
Dengue / QC	_QSEDSTFYLGER_	P00450	-0.132286	0.132286	0.152394	0.0686587	176	P00450	CP	Ceruloplasmin	CERU_HUMAN	1	-8.76154	0.912385	Dengue	QC	NaN	NaN	NaN	50.5271	0.116009
Dengue / QC	_HPDYSVVLLLR_	P02768	-0.13116	0.13116	0.0420625	0.0234456	176	P02768	ALB	Serum albumin	ALBU_HUMAN	1	-8.6903	0.913097	Dengue	QC	NaN	NaN	NaN	62.9483	0.0812124
Dengue / QC	_TINVPLRR_	D6R934;P02746	-0.141308	0.141308	0.164419	0.0730497	172	D6R934;P02746	C1QB	Complement C1q subcomponent subunit B	D6R934_HUMAN;C1QB_HUMAN	1	-9.33033	0.906697	Dengue	QC	NaN	NaN	NaN	51.6539	0.119199
Dengue / QC	_NEDSLVFVQTDK_	P01023	-0.251127	0.251127	0.104308	0.050255	176	P01023	A2M	Alpha-2-macroglobulin	A2MG_HUMAN	1	-15.976	0.84024	Dengue	QC	NaN	NaN	NaN	103.941	0.102491
Dengue / QC	_DAQYAPGYDK_	B4E1Z4	-0.164067	0.164067	0.0260332	0.0155001	174	B4E1Z4	NaN	cDNA FLJ55673, highly similar to Complement factor B (EC 3.4.21.47)	B4E1Z4_HUMAN	1	-10.7494	0.892506	Dengue	QC	NaN	NaN	NaN	64.2718	0.0736998
Dengue / QC	_THLPEVFLSK_	P02774;P02774-3	-0.16266	0.16266	0.0119982	0.00795288	176	P02774;P02774-3	GC	Vitamin D-binding protein;Isoform 3 of Vitamin D-binding protein	VTDB_HUMAN	1	-10.6623	0.893377	Dengue	QC	NaN	NaN	NaN	57.9775	0.0646021
Dengue / QC	_HYDGSYSTFGER_	P01023	-0.164813	0.164813	0.116535	0.0550973	176	P01023	A2M	Alpha-2-macroglobulin	A2MG_HUMAN	1	-10.7956	0.892044	Dengue	QC	NaN	NaN	NaN	53.8842	0.104991
Dengue / QC	_LKTQFNNNEYSQDLDAYNTKDK_	P04114	-0.144021	0.144021	0.189253	0.0819043	170	P04114	APOB	Apolipoprotein B-100	APOB_HUMAN	1	-9.50069	0.904993	Dengue	QC	NaN	NaN	NaN	56.0624	0.125898
Dengue / QC	_LFGNMEGDC[Carbamidomethyl (C)]PSDWKTDSTC[Carbamidomethyl (C)]R_	G3V0E5;P02786	-0.61023	0.61023	0.372725	0.142275	14	G3V0E5;P02786	TFRC	Transferrin receptor (P90, CD71), isoform CRA_c;Transferrin receptor protein 1	G3V0E5_HUMAN;TFR1_HUMAN	1	-34.4908	0.655092	Dengue	QC	NaN	NaN	NaN	6.41845	0.174195
Dengue / QC	_QGASGIKEIIQEK_	P07225	-0.162941	0.162941	0.180677	0.078912	146	P07225	PROS1	Vitamin K-dependent protein S	PROS_HUMAN	1	-10.6798	0.893202	Dengue	QC	NaN	NaN	NaN	55.5961	0.123093
Dengue / QC	_NLAVSQVVHK_	P01011	-0.257585	0.257585	0.370946	0.141802	174	P01011	SERPINA3	Alpha-1-antichymotrypsin	AACT_HUMAN	1	-16.3513	0.836487	Dengue	QC	NaN	NaN	NaN	41.2679	0.184427
Dengue / QC	_FYNQVSTPLLR_	P19823	-0.175677	0.175677	0.145132	0.0659848	176	P19823	ITIH2	Inter-alpha-trypsin inhibitor heavy chain H2	ITIH2_HUMAN	1	-11.4648	0.885352	Dengue	QC	NaN	NaN	NaN	65.434	0.112977
Dengue / QC	_MDILSYMR_	A0A087X1J7;P22352	-0.144499	0.144499	0.0233216	0.014138	172	A0A087X1J7;P22352	GPX3	Glutathione peroxidase;Glutathione peroxidase 3	A0A087X1J7_HUMAN;GPX3_HUMAN	1	-9.53065	0.904694	Dengue	QC	NaN	NaN	NaN	74.0089	0.071867
Dengue / QC	_TKGLC[Carbamidomethyl (C)]VATPVQLR_	P0C0L5	-0.123058	0.123058	0.0926547	0.0455845	176	P0C0L5	C4B	Complement C4-B	CO4B_HUMAN	1	-8.17607	0.918239	Dengue	QC	NaN	NaN	NaN	61.6931	0.097373
Dengue / QC	_LKQNDFNSVEEK_	P10643	-0.0916911	0.0916911	0.471788	0.171349	118	P10643	C7	Complement component C7	CO7_HUMAN	1	-6.15779	0.938422	Dengue	QC	NaN	NaN	NaN	36.9046	0.228636
Dengue / QC	_DLGEENFK_	P02768	-0.18081	0.18081	0.0331817	0.0191267	172	P02768	ALB	Serum albumin	ALBU_HUMAN	1	-11.7792	0.882208	Dengue	QC	NaN	NaN	NaN	66.1824	0.0763529
Dengue / QC	_TFVNITPAEVGVLVGKDR_	P07737	0.0671077	0.0671077	0.0987826	0.0480732	102	P07737	PFN1	Profilin-1	PROF1_HUMAN	1	4.76143	1.04761	Dengue	QC	NaN	NaN	NaN	91.0384	0.0994406
Dengue / QC	_LYHAFSAMK_	P05155;P05155-3	-0.110386	0.110386	0.0852291	0.0424673	154	P05155;P05155-3	SERPING1	Plasma protease C1 inhibitor;Isoform 3 of Plasma protease C1 inhibitor	IC1_HUMAN	1	-7.36601	0.92634	Dengue	QC	NaN	NaN	NaN	61.433	0.0947995
Dengue / QC	_MGIQHAYSENADFSGLTEDNGLK_	P05543	-0.0510709	0.0510709	0.0687634	0.0353465	144	P05543	SERPINA7	Thyroxine-binding globulin	THBG_HUMAN	1	-3.47804	0.96522	Dengue	QC	NaN	NaN	NaN	65.0521	0.0890865
Dengue / QC	_EIM[Oxidation (M)]ENYNIALR_	P08603	-0.209021	0.209021	0.0167107	0.010569	168	P08603	CFH	Complement factor H	CFAH_HUMAN	1	-13.4876	0.865124	Dengue	QC	NaN	NaN	NaN	80.2349	0.0674376
Dengue / QC	_QQTHMLDVMQDHFSR_	P10909;P10909-2;P10909-4;P10909-5	-0.178351	0.178351	0.0383928	0.0216546	140	P10909;P10909-2;P10909-4;P10909-5	CLU	Clusterin;Isoform 2 of Clusterin;Isoform 4 of Clusterin;Isoform 5 of Clusterin	CLUS_HUMAN	1	-11.6288	0.883712	Dengue	QC	NaN	NaN	NaN	73.0867	0.0780754
Dengue / QC	_EIMENYNIALR_	P08603	-0.133159	0.133159	0.046352	0.025439	176	P08603	CFH	Complement factor H	CFAH_HUMAN	1	-8.81674	0.911833	Dengue	QC	NaN	NaN	NaN	63.4623	0.0809611
Dengue / QC	_ANSYTTEYAASVK_	A0A0B4J1Y9	-0.223936	0.223936	0.107348	0.0514367	112	A0A0B4J1Y9	IGHV3-72	Immunoglobulin heavy variable 3-72	HV372_HUMAN	1	-14.3774	0.856226	Dengue	QC	NaN	NaN	NaN	75.3415	0.100932
Dengue / QC	_ELDESLQVAER_	P10909;P10909-2;P10909-4;P10909-5	-0.189148	0.189148	0.0112552	0.0075252	176	P10909;P10909-2;P10909-4;P10909-5	CLU	Clusterin;Isoform 2 of Clusterin;Isoform 4 of Clusterin;Isoform 5 of Clusterin	CLUS_HUMAN	1	-12.2877	0.877123	Dengue	QC	NaN	NaN	NaN	98.205	0.0635494
Dengue / QC	_YTC[Carbamidomethyl (C)]LPGYVR_	P04003	-0.175097	0.175097	0.00485046	0.00362904	176	P04003	C4BPA	C4b-binding protein alpha chain	C4BPA_HUMAN	1	-11.4292	0.885708	Dengue	QC	NaN	NaN	NaN	47.1285	0.0555282
Dengue / QC	_TDTSHHDQDHPTFNK_	P01009	-0.000937303	0.000937303	0.210729	0.0894971	164	P01009	SERPINA1	Alpha-1-antitrypsin	A1AT_HUMAN	1	-0.0649478	0.999351	Dengue	QC	NaN	NaN	NaN	52.1876	0.129477
Dengue / QC	_VAPEEHPVLLTEAPLNPK_	P60709	-0.138963	0.138963	0.13389	0.0617246	166	P60709	ACTB	Actin, cytoplasmic 1	ACTB_HUMAN	1	-9.18281	0.908172	Dengue	QC	NaN	NaN	NaN	89.673	0.108432
Dengue / QC	_C[Carbamidomethyl (C)]C[Carbamidomethyl (C)]AAADPHEC[Carbamidomethyl (C)]YAK_	P02768	-0.0273472	0.0273472	0.0976105	0.0476129	176	P02768	ALB	Serum albumin	ALBU_HUMAN	1	-1.87771	0.981223	Dengue	QC	NaN	NaN	NaN	52.2588	0.096941
Dengue / QC	_DLLLPQPDLR_	P02750	-0.146075	0.146075	0.165485	0.0734273	160	P02750	LRG1	Leucine-rich alpha-2-glycoprotein	A2GL_HUMAN	1	-9.62946	0.903705	Dengue	QC	NaN	NaN	NaN	79.3533	0.116587
Dengue / QC	_ESGPTTYKVTSTLTIK_	P01871	-0.129571	0.129571	0.23902	0.0992977	176	P01871	IGHM	Immunoglobulin heavy constant mu	IGHM_HUMAN	1	-8.58967	0.914103	Dengue	QC	NaN	NaN	NaN	141.911	0.137647
Dengue / QC	_VSHSEDDC[Carbamidomethyl (C)]LAFK_	P01024	-0.128143	0.128143	0.0766496	0.0387818	170	P01024	C3	Complement C3	CO3_HUMAN	1	-8.49916	0.915008	Dengue	QC	NaN	NaN	NaN	88.5232	0.0908005
Dengue / QC	_TTNIQGINLLFSSRR_	P0C0L5	-0.246359	0.246359	0.15368	0.0691031	158	P0C0L5	C4B	Complement C4-B	CO4B_HUMAN	1	-15.6979	0.843021	Dengue	QC	NaN	NaN	NaN	41.0413	0.11164
Dengue / QC	_IC[Carbamidomethyl (C)]VGC[Carbamidomethyl (C)]PR_	P01042	-0.109756	0.109756	0.176665	0.0774647	176	P01042	KNG1	Kininogen-1	KNG1_HUMAN	1	-7.3255	0.926745	Dengue	QC	NaN	NaN	NaN	60.0268	0.118515
Dengue / QC	_SEYQADYESLR_	P04114	-0.188402	0.188402	0.0233612	0.0141591	176	P04114	APOB	Apolipoprotein B-100	APOB_HUMAN	1	-12.2423	0.877577	Dengue	QC	NaN	NaN	NaN	99.5409	0.0703083
Dengue / QC	_VLVENEHR_	Q9Y6R7	0.144311	0.144311	0.524473	0.186458	36	Q9Y6R7	FCGBP	IgGFc-binding protein	FCGBP_HUMAN	1	10.5203	1.1052	Dengue	QC	NaN	NaN	NaN	8.81736	0.243934
Dengue / QC	_KSASDLTWDNLK_	P02787	-0.156666	0.156666	0.0315051	0.0182624	176	P02787	TF	Serotransferrin	TRFE_HUMAN	1	-10.2904	0.897096	Dengue	QC	NaN	NaN	NaN	47.8887	0.0727481
Dengue / QC	_VTIKPAPETEK_	P01024	0.0863097	0.0863097	0.0993576	0.048318	172	P01024	C3	Complement C3	CO3_HUMAN	1	6.16511	1.06165	Dengue	QC	NaN	NaN	NaN	71.8009	0.0964083
Dengue / QC	_AVM[Oxidation (M)]DDFAAFVEKC[Carbamidomethyl (C)]C[Carbamidomethyl (C)]K_	P02768	-0.0240551	0.0240551	0.875286	0.276189	46	P02768	ALB	Serum albumin	ALBU_HUMAN	1	-1.65355	0.983464	Dengue	QC	NaN	NaN	NaN	4.50112	0.964013
Dengue / QC	_ATLYALSHAVNNYHK_	P04114	-0.156954	0.156954	0.0949032	0.0465125	136	P04114	APOB	Apolipoprotein B-100	APOB_HUMAN	1	-10.3083	0.896917	Dengue	QC	NaN	NaN	NaN	65.098	0.0944275
Dengue / QC	_RTHLPEVFLSK_	P02774;P02774-3	-0.150368	0.150368	0.0540896	0.0289032	176	P02774;P02774-3	GC	Vitamin D-binding protein;Isoform 3 of Vitamin D-binding protein	VTDB_HUMAN	1	-9.89791	0.901021	Dengue	QC	NaN	NaN	NaN	60.237	0.0811984
Dengue / QC	_FNKPFVFLMIEQNTK_	P01009	-0.158475	0.158475	0.138941	0.0636877	168	P01009	SERPINA1	Alpha-1-antitrypsin	A1AT_HUMAN	1	-10.4028	0.895972	Dengue	QC	NaN	NaN	NaN	104.894	0.106891
Dengue / QC	_GLPAPIEK_	P01859	-0.177708	0.177708	0.0420975	0.0234575	176	P01859	IGHG2	Immunoglobulin heavy constant gamma 2	IGHG2_HUMAN	1	-11.5893	0.884107	Dengue	QC	NaN	NaN	NaN	123.026	0.0775003
Dengue / QC	_TKKQELSEAEQATR_	P01024	-0.150092	0.150092	0.144397	0.0657023	176	P01024	C3	Complement C3	CO3_HUMAN	1	-9.88071	0.901193	Dengue	QC	NaN	NaN	NaN	51.3714	0.107162
Dengue / QC	_SSGAFWK_	P25311	-0.105481	0.105481	0.092756	0.045619	172	P25311	AZGP1	Zinc-alpha-2-glycoprotein	ZA2G_HUMAN	1	-7.05049	0.929495	Dengue	QC	NaN	NaN	NaN	47.1596	0.092454
Dengue / QC	_NLDENYC[Carbamidomethyl (C)]R_	P00747	-0.196519	0.196519	0.0149598	0.0096133	168	P00747	PLG	Plasminogen	PLMN_HUMAN	1	-12.7346	0.872654	Dengue	QC	NaN	NaN	NaN	72.2515	0.0635737
Dengue / QC	_NGMLHGDKVSFFC[Carbamidomethyl (C)]K_	P02749	-0.397486	0.397486	0.356722	0.137311	116	P02749	APOH	Beta-2-glycoprotein 1	APOH_HUMAN	1	-24.082	0.75918	Dengue	QC	NaN	NaN	NaN	17.1755	0.167277
Dengue / QC	_KTLLSNLEEAKK_	P10909;P10909-2;P10909-4;P10909-5	-0.0113097	0.0113097	0.358442	0.137899	170	P10909;P10909-2;P10909-4;P10909-5	CLU	Clusterin;Isoform 2 of Clusterin;Isoform 4 of Clusterin;Isoform 5 of Clusterin	CLUS_HUMAN	1	-0.780862	0.992191	Dengue	QC	NaN	NaN	NaN	39.3419	0.170421
Dengue / QC	_GDAVC[Carbamidomethyl (C)]TESGWRPLPSC[Carbamidomethyl (C)]EEK_	P08603	-0.0662174	0.0662174	0.0899131	0.044444	176	P08603	CFH	Complement factor H	CFAH_HUMAN	1	-4.4861	0.955139	Dengue	QC	NaN	NaN	NaN	44.7248	0.091276
Dengue / QC	_FTGSQPFGQGVEHATANK_	P07996	0.0299385	0.0299385	0.186375	0.0808923	122	P07996	THBS1	Thrombospondin-1	TSP1_HUMAN	1	2.09686	1.02097	Dengue	QC	NaN	NaN	NaN	42.1826	0.117638
Dengue / QC	_DIAPTLTLYVGKK_	P00738	-0.158263	0.158263	0.119726	0.056366	176	P00738	HP	Haptoglobin	HPT_HUMAN	1	-10.3897	0.896103	Dengue	QC	NaN	NaN	NaN	88.2954	0.100474
Dengue / QC	_LIANTLC[Carbamidomethyl (C)]NSR_	Q14520;Q14520-2	-0.173029	0.173029	0.0849756	0.042363	156	Q14520;Q14520-2	HABP2	Hyaluronan-binding protein 2;Isoform 2 of Hyaluronan-binding protein 2	HABP2_HUMAN	1	-11.3022	0.886978	Dengue	QC	NaN	NaN	NaN	58.3833	0.0899861
Dengue / QC	_LQGTLPVEAR_	P01031	-0.174724	0.174724	0.0177404	0.0111469	174	P01031	C5	Complement C5	CO5_HUMAN	1	-11.4063	0.885937	Dengue	QC	NaN	NaN	NaN	74.8492	0.0650309
Dengue / QC	_HQNQWYTVC[Carbamidomethyl (C)]QTGWSLR_	O43866	-0.124654	0.124654	0.107895	0.051647	174	O43866	CD5L	CD5 antigen-like	CD5L_HUMAN	1	-8.27759	0.917224	Dengue	QC	NaN	NaN	NaN	57.7356	0.0965349
Dengue / QC	_GVTFLLRR_	P04217	-0.0874776	0.0874776	0.0690707	0.0354824	156	P04217	A1BG	Alpha-1B-glycoprotein	A1BG_HUMAN	1	-5.88332	0.941167	Dengue	QC	NaN	NaN	NaN	59.3072	0.0850918
Dengue / QC	_RHPYFYAPELLFFAKR_	P02768	-0.213216	0.213216	0.257718	0.105756	176	P02768	ALB	Serum albumin	ALBU_HUMAN	1	-13.7388	0.862612	Dengue	QC	NaN	NaN	NaN	47.4386	0.137373
Dengue / QC	_TKNDFTWFK_	P08603	-0.1724	0.1724	0.013935	0.00904544	176	P08603	CFH	Complement factor H	CFAH_HUMAN	1	-11.2634	0.887366	Dengue	QC	NaN	NaN	NaN	66.8561	0.0621745
Dengue / QC	_MEEM[Oxidation (M)]GSR_	P02649	-0.0274323	0.0274323	0.792017	0.256407	16	P02649	APOE	Apolipoprotein E	APOE_HUMAN	1	-1.8835	0.981165	Dengue	QC	NaN	NaN	NaN	8.62558	0.575897
Dengue / QC	_YKAAFTEC[Carbamidomethyl (C)]C[Carbamidomethyl (C)]QAADK_	P02768	-0.291399	0.291399	0.165009	0.07325	176	P02768	ALB	Serum albumin	ALBU_HUMAN	1	-18.2891	0.817109	Dengue	QC	NaN	NaN	NaN	70.2207	0.111472
Dengue / QC	_ASSLESGVPSR_	P01602	-0.143831	0.143831	0.3259	0.127843	176	P01602	IGKV1-5	Immunoglobulin kappa variable 1-5	KV105_HUMAN	1	-9.48876	0.905112	Dengue	QC	NaN	NaN	NaN	68.1968	0.157999
Dengue / QC	_NPNPSAPR_	P08697	-0.135448	0.135448	0.187593	0.0813355	162	P08697	SERPINF2	Alpha-2-antiplasmin	A2AP_HUMAN	1	-8.96127	0.910387	Dengue	QC	NaN	NaN	NaN	59.8963	0.117085
Dengue / QC	_LELSVDGAK_	P0C0L5	-0.193609	0.193609	0.0349201	0.0199771	176	P0C0L5	C4B	Complement C4-B	CO4B_HUMAN	1	-12.5584	0.874416	Dengue	QC	NaN	NaN	NaN	81.4767	0.0727391
Dengue / QC	_DVM[Oxidation (M)]QGTDEHVVC[Carbamidomethyl (C)]K_	P01871	0.208015	0.208015	0.545146	0.192173	42	P01871	IGHM	Immunoglobulin heavy constant mu	IGHM_HUMAN	1	15.5098	1.1551	Dengue	QC	NaN	NaN	NaN	21.257	0.253587
Dengue / QC	_YYGYTGAFR_	E7ER44;P02788	-0.106326	0.106326	0.38694	0.14647	140	E7ER44;P02788	LTF	Lactotransferrin	E7ER44_HUMAN;TRFL_HUMAN	1	-7.10492	0.928951	Dengue	QC	NaN	NaN	NaN	134.917	0.179346
Dengue / QC	_SLHTLFGDKLC[Carbamidomethyl (C)]TVATLR_	P02768	-0.284963	0.284963	0.164739	0.0731639	176	P02768	ALB	Serum albumin	ALBU_HUMAN	1	-17.9237	0.820763	Dengue	QC	NaN	NaN	NaN	49.6856	0.110324
Dengue / QC	_KPVDEYKDC[Carbamidomethyl (C)]HLAQVPSHTVVAR_	P02787	-0.160056	0.160056	0.139317	0.0638083	176	P02787	TF	Serotransferrin	TRFE_HUMAN	1	-10.501	0.89499	Dengue	QC	NaN	NaN	NaN	54.4445	0.103571
Dengue / QC	_LPPTTTC[Carbamidomethyl (C)]QQQK_	B4E1Z4	-0.107554	0.107554	0.046731	0.0256042	152	B4E1Z4	NaN	cDNA FLJ55673, highly similar to Complement factor B (EC 3.4.21.47)	B4E1Z4_HUMAN	1	-7.18396	0.92816	Dengue	QC	NaN	NaN	NaN	103.418	0.0770217
Dengue / QC	_GVFVLNKK_	P01024	-0.200811	0.200811	0.158285	0.0708427	166	P01024	C3	Complement C3	CO3_HUMAN	1	-12.9939	0.870061	Dengue	QC	NaN	NaN	NaN	65.7953	0.108554
Dengue / QC	_GQIVFMNR_	P0C0L5	-0.165068	0.165068	0.0327271	0.0188911	150	P0C0L5	C4B	Complement C4-B	CO4B_HUMAN	1	-10.8114	0.891886	Dengue	QC	NaN	NaN	NaN	142.024	0.0717675
Dengue / QC	_LVRPEVDVMC[Carbamidomethyl (C)]TAFHDNEETFLKK_	P02768	-0.140888	0.140888	0.0664948	0.0343856	176	P02768	ALB	Serum albumin	ALBU_HUMAN	1	-9.3039	0.906961	Dengue	QC	NaN	NaN	NaN	55.449	0.0825616
Dengue / QC	_AEDTAVYYC[Carbamidomethyl (C)]VK_	A0A0J9YX35	-0.0807909	0.0807909	0.327856	0.128401	108	A0A0J9YX35	IGHV3-64D	Immunoglobulin heavy variable 3-64D	HV64D_HUMAN	1	-5.44609	0.945539	Dengue	QC	NaN	NaN	NaN	40.9285	0.155837
Dengue / QC	_WQQGNIFSC[Carbamidomethyl (C)]SVMHEALHNR_	P01860	-0.130038	0.130038	0.0636463	0.0331294	172	P01860	IGHG3	Immunoglobulin heavy constant gamma 3	IGHG3_HUMAN	1	-8.61926	0.913807	Dengue	QC	NaN	NaN	NaN	145.717	0.08245
Dengue / QC	_MHSMNGFMYGNQPGLTMC[Carbamidomethyl (C)]K_	P00450	-0.128795	0.128795	0.0672478	0.0347004	166	P00450	CP	Ceruloplasmin	CERU_HUMAN	1	-8.54049	0.914595	Dengue	QC	NaN	NaN	NaN	100.591	0.083215
Dengue / QC	_TNFDNDIALVR_	P09871	-0.144095	0.144095	0.0521538	0.028035	176	P09871	C1S	Complement C1s subcomponent	C1S_HUMAN	1	-9.50531	0.904947	Dengue	QC	NaN	NaN	NaN	63.1243	0.0776663
Dengue / QC	_LLDSLPSDTR_	P05155;P05155-3	-0.179861	0.179861	0.0251701	0.0150686	148	P05155;P05155-3	SERPING1	Plasma protease C1 inhibitor;Isoform 3 of Plasma protease C1 inhibitor	IC1_HUMAN	1	-11.7212	0.882788	Dengue	QC	NaN	NaN	NaN	142.486	0.0675164
Dengue / QC	_YNALDLTNNGK_	P04114	-0.166065	0.166065	0.0764414	0.0387002	170	P04114	APOB	Apolipoprotein B-100	APOB_HUMAN	1	-10.873	0.89127	Dengue	QC	NaN	NaN	NaN	76.2833	0.0850403
Dengue / QC	_VYFAGFPR_	P07225	-0.153339	0.153339	0.0282207	0.0166072	176	P07225	PROS1	Vitamin K-dependent protein S	PROS_HUMAN	1	-10.0833	0.899167	Dengue	QC	NaN	NaN	NaN	51.8078	0.0675477
Dengue / QC	_ATEDEGS[Phospho (STY)]EQKIPEATNR_	P01008	0.120996	0.120996	0.30978	0.122856	106	P01008	SERPINC1	Antithrombin-III	ANT3_HUMAN	1	8.74851	1.08749	Dengue	QC	NaN	NaN	NaN	27.9445	0.14729
Dengue / QC	_IQYYC[Carbamidomethyl (C)]HEPYYK_	B4DPQ0	0.0476896	0.0476896	0.344013	0.133362	170	B4DPQ0	C1R	Complement C1r subcomponent	B4DPQ0_HUMAN	1	3.36083	1.03361	Dengue	QC	NaN	NaN	NaN	27.8154	0.158242
Dengue / QC	_HTLNQIDEVK_	P02765	-0.248247	0.248247	0.15512	0.0695987	176	P02765	AHSG	Alpha-2-HS-glycoprotein	FETUA_HUMAN	1	-15.8081	0.841919	Dengue	QC	NaN	NaN	NaN	66.9503	0.105654
Dengue / QC	_IYGNQDTSSQLKK_	P19823	0.198325	0.198325	0.200714	0.0859393	160	P19823	ITIH2	Inter-alpha-trypsin inhibitor heavy chain H2	ITIH2_HUMAN	1	14.7365	1.14737	Dengue	QC	NaN	NaN	NaN	50.4359	0.117143
Dengue / QC	_DSGFQMNQLR_	P02787	-0.139905	0.139905	0.185311	0.0805274	176	P02787	TF	Serotransferrin	TRFE_HUMAN	1	-9.24209	0.907579	Dengue	QC	NaN	NaN	NaN	46.2583	0.112921
Dengue / QC	_IYISGMAPR_	P04004	-0.162803	0.162803	0.0200156	0.012373	176	P04004	VTN	Vitronectin	VTNC_HUMAN	1	-10.6712	0.893288	Dengue	QC	NaN	NaN	NaN	138.882	0.0644457
Dengue / QC	_QKFQSVFTVTR_	P02747	-0.180789	0.180789	0.0491943	0.0267557	176	P02747	C1QC	Complement C1q subcomponent subunit C	C1QC_HUMAN	1	-11.778	0.88222	Dengue	QC	NaN	NaN	NaN	63.0067	0.0754167
Dengue / QC	_KVESELIKPINPR_	P07225	-0.189814	0.189814	0.262812	0.107487	176	P07225	PROS1	Vitamin K-dependent protein S	PROS_HUMAN	1	-12.3281	0.876719	Dengue	QC	NaN	NaN	NaN	44.2512	0.133334
Dengue / QC	_GDKLFGPDLK_	P08697	-0.129695	0.129695	0.0235206	0.0142362	176	P08697	SERPINF2	Alpha-2-antiplasmin	A2AP_HUMAN	1	-8.59756	0.914024	Dengue	QC	NaN	NaN	NaN	51.4912	0.0646683
Dengue / QC	_FSGSSSGNTASLTITGAQAEDEADYYC[Carbamidomethyl (C)]NSR_	P01714	-0.134235	0.134235	0.42978	0.159186	124	P01714	IGLV3-19	Immunoglobulin lambda variable 3-19	LV319_HUMAN	1	-8.88474	0.911153	Dengue	QC	NaN	NaN	NaN	66.6774	0.1891
Dengue / QC	_SDLAVPSELALLK_	Q08380	-0.0447695	0.0447695	0.417649	0.155775	172	Q08380	LGALS3BP	Galectin-3-binding protein	LG3BP_HUMAN	1	-3.05553	0.969445	Dengue	QC	NaN	NaN	NaN	97.3225	0.184507
Dengue / QC	_LADDLYR_	O75882;O75882-2;O75882-3	-0.159627	0.159627	0.0909938	0.044894	106	O75882;O75882-2;O75882-3	ATRN	Attractin;Isoform 2 of Attractin;Isoform 3 of Attractin	ATRN_HUMAN	1	-10.4743	0.895257	Dengue	QC	NaN	NaN	NaN	41.4294	0.0867564
Dengue / QC	_KYFIDFVAR_	P01042	-0.160629	0.160629	0.00233016	0.00191416	176	P01042	KNG1	Kininogen-1	KNG1_HUMAN	1	-10.5365	0.894635	Dengue	QC	NaN	NaN	NaN	66.7148	0.0474156
Dengue / QC	_SPELQAEAK_	P02652;V9GYM3	-0.13879	0.13879	0.0416398	0.0232586	162	P02652;V9GYM3	APOA2	Apolipoprotein A-II	APOA2_HUMAN;V9GYM3_HUMAN	1	-9.17194	0.908281	Dengue	QC	NaN	NaN	NaN	98.7087	0.0726426
Dengue / QC	_SDFSNEER_	P48740	-0.134639	0.134639	0.16867	0.0745711	144	P48740	MASP1	Mannan-binding lectin serine protease 1	MASP1_HUMAN	1	-8.91025	0.910898	Dengue	QC	NaN	NaN	NaN	56.9479	0.107389
Dengue / QC	_IC[Carbamidomethyl (C)]AMEGLPQK_	P43652	-0.214745	0.214745	0.0829338	0.0414741	160	P43652	AFM	Afamin	AFAM_HUMAN	1	-13.8301	0.861699	Dengue	QC	NaN	NaN	NaN	74.4129	0.0851026
Dengue / QC	_IQNILTEEPK_	P27169	-0.117712	0.117712	0.0233562	0.0141575	176	P27169	PON1	Serum paraoxonase/arylesterase 1	PON1_HUMAN	1	-7.8352	0.921648	Dengue	QC	NaN	NaN	NaN	68.0397	0.0644444
Dengue / QC	_GQPREPQVYTLPPSR_	P01857	-0.136085	0.136085	0.303172	0.120758	176	P01857	IGHG1	Immunoglobulin heavy constant gamma 1	IGHG1_HUMAN	1	-9.00151	0.909985	Dengue	QC	NaN	NaN	NaN	55.274	0.143831
Dengue / QC	_DTLMISR_	P01857	-0.165371	0.165371	0.0606864	0.0318443	176	P01857	IGHG1	Immunoglobulin heavy constant gamma 1	IGHG1_HUMAN	1	-10.8301	0.891699	Dengue	QC	NaN	NaN	NaN	63.6981	0.0780778
Dengue / QC	_ELSSFIDK_	P02774;P02774-3	-0.12551	0.12551	0.164286	0.0729962	116	P02774;P02774-3	GC	Vitamin D-binding protein;Isoform 3 of Vitamin D-binding protein	VTDB_HUMAN	1	-8.33204	0.91668	Dengue	QC	NaN	NaN	NaN	44.3046	0.105335
Dengue / QC	_TVAAC[Carbamidomethyl (C)]NLPIVR_	P02760	-0.113201	0.113201	0.101612	0.049203	176	P02760	AMBP	Protein AMBP	AMBP_HUMAN	1	-7.54656	0.924534	Dengue	QC	NaN	NaN	NaN	55.8743	0.0893177
Dengue / QC	_MSAVEGIC[Carbamidomethyl (C)]TSESPVIDHQGTK_	P01031	-0.138039	0.138039	0.0918729	0.0452541	176	P01031	C5	Complement C5	CO5_HUMAN	1	-9.12465	0.908754	Dengue	QC	NaN	NaN	NaN	48.0036	0.0864011
Dengue / QC	_NTLIIYLDK_	P01024	-0.141423	0.141423	0.120072	0.0564822	158	P01024	C3	Complement C3	CO3_HUMAN	1	-9.33755	0.906625	Dengue	QC	NaN	NaN	NaN	86.3446	0.0943339
Dengue / QC	_DDPDAPLQPVTPLQLFEGR_	P0C0L5	-0.216502	0.216502	0.221318	0.0931575	160	P0C0L5	C4B	Complement C4-B	CO4B_HUMAN	1	-13.9351	0.860649	Dengue	QC	NaN	NaN	NaN	110.06	0.120402
Dengue / QC	_VYAC[Carbamidomethyl (C)]EVTHQGLSSPVTKSFNR_	P01834	-0.067305	0.067305	0.102104	0.0493667	114	P01834	IGKC	Immunoglobulin kappa constant	IGKC_HUMAN	1	-4.55808	0.954419	Dengue	QC	NaN	NaN	NaN	80.6609	0.0893615
Dengue / QC	_NTC[Carbamidomethyl (C)]NHDEDTWVEC[Carbamidomethyl (C)]EDPFDLR_	O43866	-0.164321	0.164321	0.238764	0.0992126	174	O43866	CD5L	CD5 antigen-like	CD5L_HUMAN	1	-10.7652	0.892348	Dengue	QC	NaN	NaN	NaN	67.9246	0.124276
Dengue / QC	_IPTTFENGR_	P05090	-0.109606	0.109606	0.066701	0.0344799	134	P05090	APOD	Apolipoprotein D	APOD_HUMAN	1	-7.31591	0.926841	Dengue	QC	NaN	NaN	NaN	75.3474	0.079238
Dengue / QC	_LVGGPMDASVEEEGVRR_	P01034	-0.158051	0.158051	0.154695	0.0694405	144	P01034	CST3	Cystatin-C	CYTC_HUMAN	1	-10.3765	0.896235	Dengue	QC	NaN	NaN	NaN	103.332	0.10279
Dengue / QC	_TC[Carbamidomethyl (C)]VADES[Phospho (STY)]AENC[Carbamidomethyl (C)]DKSLHTLFGDKLC[Carbamidomethyl (C)]TVATLR_	P02768	0.224753	0.224753	0.68227	0.229425	148	P02768	ALB	Serum albumin	ALBU_HUMAN	1	16.8577	1.16858	Dengue	QC	NaN	NaN	NaN	48.7446	0.357074
Dengue / QC	_ELSSFIDKGQELC[Carbamidomethyl (C)]ADYSENTFTEYK_	P02774;P02774-3	0.0138046	0.0138046	0.17998	0.0786791	138	P02774;P02774-3	GC	Vitamin D-binding protein;Isoform 3 of Vitamin D-binding protein	VTDB_HUMAN	1	0.961456	1.00961	Dengue	QC	NaN	NaN	NaN	69.3707	0.108492
Dengue / QC	_LHTEAQIQEEGTVVELTGR_	P01023	-0.111743	0.111743	0.155435	0.0697134	176	P01023	A2M	Alpha-2-macroglobulin	A2MG_HUMAN	1	-7.4531	0.925469	Dengue	QC	NaN	NaN	NaN	59.8696	0.102015
Dengue / QC	_NPDNDPQGPWC[Carbamidomethyl (C)]YTTDPEKR_	P00747	-0.108447	0.108447	0.0310106	0.0180084	172	P00747	PLG	Plasminogen	PLMN_HUMAN	1	-7.2414	0.927586	Dengue	QC	NaN	NaN	NaN	70.9032	0.0666779
Dengue / QC	_ADSSPVKAGVETTTPSK_	P0DOY2	-0.104904	0.104904	0.328843	0.128726	174	P0DOY2	IGLC2	Immunoglobulin lambda constant 2	IGLC2_HUMAN	1	-7.0133	0.929867	Dengue	QC	NaN	NaN	NaN	57.5095	0.148879
Dengue / QC	_VESKYGPPC[Carbamidomethyl (C)]PSC[Carbamidomethyl (C)]PAPEFLGGPSVFLFPPKPK_	P01861	-0.126959	0.126959	0.525295	0.1866	74	P01861	IGHG4	Immunoglobulin heavy constant gamma 4	IGHG4_HUMAN	1	-8.424	0.91576	Dengue	QC	NaN	NaN	NaN	49.0571	0.229107
Dengue / QC	_DDSKNTLYLQMNSLK_	A0A0B4J1V0	-0.127263	0.127263	0.114741	0.0543785	152	A0A0B4J1V0	IGHV3-15	Immunoglobulin heavy variable 3-15	HV315_HUMAN	1	-8.44329	0.915567	Dengue	QC	NaN	NaN	NaN	89.4264	0.0919527
Dengue / QC	_FNKPFVFLM[Oxidation (M)]IEQNTK_	P01009	-0.089984	0.089984	0.236696	0.0984484	138	P01009	SERPINA1	Alpha-1-antitrypsin	A1AT_HUMAN	1	-6.04668	0.939533	Dengue	QC	NaN	NaN	NaN	85.4303	0.122867
Dengue / QC	_KWQEEMELYR_	P02647	-0.147452	0.147452	0.0187278	0.0116922	170	P02647	APOA1	Apolipoprotein A-I	APOA1_HUMAN	1	-9.71563	0.902844	Dengue	QC	NaN	NaN	NaN	154.268	0.0616034
Dengue / QC	_RQEC[Carbamidomethyl (C)]SIPVC[Carbamidomethyl (C)]GQDQVTVAM[Oxidation (M)]TPR_	P00734	-0.0904903	0.0904903	0.177321	0.0776993	136	P00734	F2	Prothrombin	THRB_HUMAN	1	-6.07965	0.939204	Dengue	QC	NaN	NaN	NaN	102.291	0.1076
Dengue / QC	_DFSAEYEEDGKYEGLQEWEGK_	P04114	-0.173164	0.173164	0.284219	0.114746	132	P04114	APOB	Apolipoprotein B-100	APOB_HUMAN	1	-11.3105	0.886895	Dengue	QC	NaN	NaN	NaN	61.0718	0.135116
Dengue / QC	_VTFQLTYEEVLKR_	P19827	-0.220707	0.220707	0.326893	0.128102	174	P19827	ITIH1	Inter-alpha-trypsin inhibitor heavy chain H1	ITIH1_HUMAN	1	-14.1855	0.858145	Dengue	QC	NaN	NaN	NaN	43.5106	0.146695
Dengue / QC	_KLTISEQNIQR_	P04114	-0.106866	0.106866	0.316806	0.125161	124	P04114	APOB	Apolipoprotein B-100	APOB_HUMAN	1	-7.13972	0.928603	Dengue	QC	NaN	NaN	NaN	36.7824	0.143129
Dengue / QC	_PSLSHLLSQYYGAGVAR_	Q96PD5	-0.0126684	0.0126684	0.369099	0.141255	118	Q96PD5	PGLYRP2	N-acetylmuramoyl-L-alanine amidase	PGRP2_HUMAN	1	-0.874259	0.991257	Dengue	QC	NaN	NaN	NaN	45.6279	0.159794
Dengue / QC	_TTVM[Oxidation (M)]VKNEDSLVFVQTDK_	P01023	-0.595703	0.595703	0.680276	0.228888	124	P01023	A2M	Alpha-2-macroglobulin	A2MG_HUMAN	1	-33.8278	0.661722	Dengue	QC	NaN	NaN	NaN	79.0225	0.350051
Dengue / QC	_NNRPSGIPDR_	P01714	0.0166134	0.0166134	0.657424	0.223032	64	P01714	IGLV3-19	Immunoglobulin lambda variable 3-19	LV319_HUMAN	1	1.15821	1.01158	Dengue	QC	NaN	NaN	NaN	59.4268	0.324543
Dengue / QC	_NLQNNAEWVYQGAIR_	P04114	-0.120345	0.120345	0.0208109	0.0127962	172	P04114	APOB	Apolipoprotein B-100	APOB_HUMAN	1	-8.00324	0.919968	Dengue	QC	NaN	NaN	NaN	100.713	0.061368
Dengue / QC	_VSNRDSGVPDR_	P06310	-0.131991	0.131991	0.456493	0.166877	134	P06310	IGKV2-30	Immunoglobulin kappa variable 2-30	KV230_HUMAN	1	-8.74291	0.912571	Dengue	QC	NaN	NaN	NaN	53.793	0.192056
Dengue / QC	_YEFLNGR_	P00747	-0.187513	0.187513	0.15602	0.0699485	154	P00747	PLG	Plasminogen	PLMN_HUMAN	1	-12.1882	0.878118	Dengue	QC	NaN	NaN	NaN	55.4814	0.0999643
Dengue / QC	_YWNDC[Carbamidomethyl (C)]EPPDSR_	P04196	-0.160418	0.160418	0.0797444	0.0401225	146	P04196	HRG	Histidine-rich glycoprotein	HRG_HUMAN	1	-10.5235	0.894765	Dengue	QC	NaN	NaN	NaN	57.2454	0.0804393
Dengue / QC	_ELKEQQDSPGNKDFLQSLK_	P08697	-0.136627	0.136627	0.0934273	0.0458983	176	P08697	SERPINF2	Alpha-2-antiplasmin	A2AP_HUMAN	1	-9.03564	0.909644	Dengue	QC	NaN	NaN	NaN	49.7	0.083676
Dengue / QC	_SFYANNHC[Carbamidomethyl (C)]IGTDLNR_	A0A087WSY5;Q96IY4	-0.101332	0.101332	0.171445	0.0755662	162	A0A087WSY5;Q96IY4	CPB2	Carboxypeptidase B2	A0A087WSY5_HUMAN;CBPB2_HUMAN	1	-6.78279	0.932172	Dengue	QC	NaN	NaN	NaN	42.0213	0.102592
Dengue / QC	_HGNTDSEGIVEVK_	E7ETH0;G3XAM2;P05156	-0.0453204	0.0453204	0.0472203	0.0258398	176	E7ETH0;G3XAM2;P05156	CFI	Complement factor I	E7ETH0_HUMAN;G3XAM2_HUMAN;CFAI_HUMAN	1	-3.09254	0.969075	Dengue	QC	NaN	NaN	NaN	57.522	0.070367
Dengue / QC	_GEPGDPVNLLR_	O75636	-0.054172	0.054172	0.498206	0.178983	54	O75636	FCN3	Ficolin-3	FCN3_HUMAN	1	-3.6853	0.963147	Dengue	QC	NaN	NaN	NaN	17.513	0.206193
Dengue / QC	_SPEQQETVLDGNLIIR_	Q14624	-0.238155	0.238155	0.0899904	0.0444673	176	Q14624	ITIH4	Inter-alpha-trypsin inhibitor heavy chain H4	ITIH4_HUMAN	1	-15.2171	0.847829	Dengue	QC	NaN	NaN	NaN	55.6946	0.0825791
Dengue / QC	_AVISPGFDVFAKK_	B4E1Z4	-0.222377	0.222377	0.0871027	0.0432515	128	B4E1Z4	NaN	cDNA FLJ55673, highly similar to Complement factor B (EC 3.4.21.47)	B4E1Z4_HUMAN	1	-14.2848	0.857152	Dengue	QC	NaN	NaN	NaN	44.2589	0.0812833
Dengue / QC	_ITINPDTSK_	A0A0B4J1U7	-0.170169	0.170169	0.320771	0.126338	132	A0A0B4J1U7	IGHV6-1	Immunoglobulin heavy variable 6-1	HV601_HUMAN	1	-11.1262	0.888738	Dengue	QC	NaN	NaN	NaN	81.5302	0.142178
Dengue / QC	_LIDQYGTHYLQSGSLGGEYR_	P10643	-0.12856	0.12856	0.206818	0.0881587	148	P10643	C7	Complement component C7	CO7_HUMAN	1	-8.5256	0.914744	Dengue	QC	NaN	NaN	NaN	60.7597	0.110869
Dengue / QC	_VDLSFSPSQSLPASHAHLR_	P01023	-0.210094	0.210094	0.0422624	0.0235381	176	P01023	A2M	Alpha-2-macroglobulin	A2MG_HUMAN	1	-13.5519	0.864481	Dengue	QC	NaN	NaN	NaN	128.692	0.0688727
Dengue / QC	_GKYEMYLK_	Q06033;Q06033-2	-0.155997	0.155997	0.418413	0.155994	128	Q06033;Q06033-2	ITIH3	Inter-alpha-trypsin inhibitor heavy chain H3;Isoform 2 of Inter-alpha-trypsin inhibitor heavy chain H3	ITIH3_HUMAN	1	-10.2488	0.897512	Dengue	QC	NaN	NaN	NaN	53.8869	0.173186
Dengue / QC	_AQGYSGLSVK_	P07996	-0.0829242	0.0829242	0.037461	0.0212119	152	P07996	THBS1	Thrombospondin-1	TSP1_HUMAN	1	-5.5858	0.944142	Dengue	QC	NaN	NaN	NaN	90.9376	0.0665314
Dengue / QC	_QEDMKGHFSISIPVK_	P01023	-0.139984	0.139984	0.142735	0.0651103	156	P01023	A2M	Alpha-2-macroglobulin	A2MG_HUMAN	1	-9.24707	0.907529	Dengue	QC	NaN	NaN	NaN	97.6254	0.0947866
Dengue / QC	_VTAAPQSVC[Carbamidomethyl (C)]ALR_	P01023	-0.128722	0.128722	0.315116	0.124621	176	P01023	A2M	Alpha-2-macroglobulin	A2MG_HUMAN	1	-8.53588	0.914641	Dengue	QC	NaN	NaN	NaN	61.086	0.138117
Dengue / QC	_IRYYTYLIMNK_	P01024	-0.175631	0.175631	0.0498807	0.0270576	174	P01024	C3	Complement C3	CO3_HUMAN	1	-11.462	0.88538	Dengue	QC	NaN	NaN	NaN	105.271	0.0703969
Dengue / QC	_GPLQLER_	P02750	-0.11306	0.11306	0.186016	0.0807668	156	P02750	LRG1	Leucine-rich alpha-2-glycoprotein	A2GL_HUMAN	1	-7.53752	0.924625	Dengue	QC	NaN	NaN	NaN	65.0522	0.104456
Dengue / QC	_EFDHNSNIR_	P08603	0.0326333	0.0326333	0.211886	0.0899025	132	P08603	CFH	Complement factor H	CFAH_HUMAN	1	2.28775	1.02288	Dengue	QC	NaN	NaN	NaN	56.0235	0.110456
Dengue / QC	_WFYIASAFR_	P19652	-0.170121	0.170121	0.304874	0.12131	176	P19652	ORM2	Alpha-1-acid glycoprotein 2	A1AG2_HUMAN	1	-11.1232	0.888768	Dengue	QC	NaN	NaN	NaN	86.2315	0.134985
Dengue / QC	_LLLQMDSSATAYGSTVSKR_	P04114	-0.176446	0.176446	0.0515834	0.027775	162	P04114	APOB	Apolipoprotein B-100	APOB_HUMAN	1	-11.512	0.88488	Dengue	QC	NaN	NaN	NaN	93.5993	0.0705423
Dengue / QC	_VFALDQK_	P0C0L5	-0.137431	0.137431	0.044592	0.0246405	176	P0C0L5	C4B	Complement C4-B	CO4B_HUMAN	1	-9.08632	0.909137	Dengue	QC	NaN	NaN	NaN	62.1969	0.0675573
Dengue / QC	_SFFKEALQGVGDMGR_	A0A096LPE2	-0.00199356	0.00199356	0.149815	0.0677136	146	A0A096LPE2	SAA2-SAA4	SAA2-SAA4 readthrough	A0A096LPE2_HUMAN	1	-0.138088	0.998619	Dengue	QC	NaN	NaN	NaN	51.1418	0.0946877
Dengue / QC	_AYLEEEC[Carbamidomethyl (C)]PATLR_	P25311	-0.158967	0.158967	0.04968	0.0269716	172	P25311	AZGP1	Zinc-alpha-2-glycoprotein	ZA2G_HUMAN	1	-10.4334	0.895666	Dengue	QC	NaN	NaN	NaN	86.9441	0.0695467
Dengue / QC	_VVTFC[Carbamidomethyl (C)]GHTSK_	P02747	-0.315177	0.315177	0.518053	0.184684	44	P02747	C1QC	Complement C1q subcomponent subunit C	C1QC_HUMAN	1	-19.6247	0.803753	Dengue	QC	NaN	NaN	NaN	25.6124	0.210743
Dengue / QC	_EDTPNSVWEPAK_	P09871	-0.234215	0.234215	0.148691	0.0672953	158	P09871	C1S	Complement C1s subcomponent	C1S_HUMAN	1	-14.9853	0.850147	Dengue	QC	NaN	NaN	NaN	94.3945	0.094802
Dengue / QC	_GDSTFESK_	P02671	0.115134	0.115134	0.539089	0.190446	66	P02671	FGA	Fibrinogen alpha chain	FIBA_HUMAN	1	8.30754	1.08308	Dengue	QC	NaN	NaN	NaN	26.8368	0.221728
Dengue / QC	_QTALVELVKHKPK_	P02768	0.0454653	0.0454653	0.308262	0.122397	170	P02768	ALB	Serum albumin	ALBU_HUMAN	1	3.2016	1.03202	Dengue	QC	NaN	NaN	NaN	55.158	0.133994
Dengue / QC	_KLYHSEAFTVNFGDTEEAKK_	P01009	-0.0579632	0.0579632	0.246478	0.101839	150	P01009	SERPINA1	Alpha-1-antitrypsin	A1AT_HUMAN	1	-3.93806	0.960619	Dengue	QC	NaN	NaN	NaN	70.06	0.11781
Dengue / QC	_C[Carbamidomethyl (C)]STSSLLEAC[Carbamidomethyl (C)]TFR_	P02787	-0.167312	0.167312	0.0226843	0.0138082	176	P02787	TF	Serotransferrin	TRFE_HUMAN	1	-10.95	0.8905	Dengue	QC	NaN	NaN	NaN	59.813	0.0586614
Dengue / QC	_DNELLVYK_	P02743	-0.136144	0.136144	0.0602909	0.0316743	138	P02743	APCS	Serum amyloid P-component	SAMP_HUMAN	1	-9.00522	0.909948	Dengue	QC	NaN	NaN	NaN	104.1	0.0721686
Dengue / QC	_IEC[Carbamidomethyl (C)]VSAETTEDC[Carbamidomethyl (C)]IAK_	P02787	-0.121187	0.121187	0.0393771	0.0221211	176	P02787	TF	Serotransferrin	TRFE_HUMAN	1	-8.0569	0.919431	Dengue	QC	NaN	NaN	NaN	50.0191	0.0646756
Dengue / QC	_QGPVNLLSDPEQGVEVTGQYER_	Q14624	-0.142834	0.142834	0.0660642	0.0342151	174	Q14624	ITIH4	Inter-alpha-trypsin inhibitor heavy chain H4	ITIH4_HUMAN	1	-9.42617	0.905738	Dengue	QC	NaN	NaN	NaN	82.2634	0.0734348
Dengue / QC	_TLIYDTSNKHSWTPAR_	A0A075B6I9	-0.0402676	0.0402676	0.447511	0.164384	92	A0A075B6I9	IGLV7-46	Immunoglobulin lambda variable 7-46	LV746_HUMAN	1	-2.75254	0.972475	Dengue	QC	NaN	NaN	NaN	83.1162	0.179126
Dengue / QC	_VQAAVGTSAAPVPSDNH_	P02649	-0.073231	0.073231	0.0385138	0.0217059	158	P02649	APOE	Apolipoprotein E	APOE_HUMAN	1	-4.94931	0.950507	Dengue	QC	NaN	NaN	NaN	96.0365	0.0649762
Dengue / QC	_TLDEFTIIQNLQPQYQFR_	B4DPQ0	0.219637	0.219637	0.453626	0.166035	156	B4DPQ0	C1R	Complement C1r subcomponent	B4DPQ0_HUMAN	1	16.444	1.16444	Dengue	QC	NaN	NaN	NaN	34.0713	0.17972
Dengue / QC	_C[Carbamidomethyl (C)]LPVTAPENGK_	P08603	-0.118872	0.118872	0.114056	0.0541175	176	P08603	CFH	Complement factor H	CFAH_HUMAN	1	-7.90925	0.920908	Dengue	QC	NaN	NaN	NaN	56.7447	0.0848579
Dengue / QC	_VPSYTLILPSLELPVLHVPR_	P04114	0.0627063	0.0627063	0.458732	0.167561	156	P04114	APOB	Apolipoprotein B-100	APOB_HUMAN	1	4.44231	1.04442	Dengue	QC	NaN	NaN	NaN	43.371	0.182109
Dengue / QC	_TEIDKPSQMQVTDVQDNSISVK_	P02751;P02751-15;P02751-3;P02751-7	-0.18571	0.18571	0.288079	0.115955	164	P02751;P02751-15;P02751-3;P02751-7	FN1	Fibronectin;Isoform 15 of Fibronectin;Isoform 3 of Fibronectin;Isoform 7 of Fibronectin	FINC_HUMAN	1	-12.0784	0.879216	Dengue	QC	NaN	NaN	NaN	51.4269	0.126328
Dengue / QC	_AEEEHLGILGPQLHADVGDK_	P00450	-0.0368278	0.0368278	0.183596	0.0799328	118	P00450	CP	Ceruloplasmin	CERU_HUMAN	1	-2.5204	0.974796	Dengue	QC	NaN	NaN	NaN	73.729	0.100996
Dengue / QC	_EGQMESVEAAMSSK_	P05543	-0.209013	0.209013	0.132583	0.0612295	174	P05543	SERPINA7	Thyroxine-binding globulin	THBG_HUMAN	1	-13.4871	0.865129	Dengue	QC	NaN	NaN	NaN	58.0667	0.0887378
Dengue / QC	_TSDQIHFFFAK_	P01008	-0.100199	0.100199	0.0854185	0.0425434	148	P01008	SERPINC1	Antithrombin-III	ANT3_HUMAN	1	-6.7096	0.932904	Dengue	QC	NaN	NaN	NaN	78.9654	0.0776747
Dengue / QC	_IDSLLENDRQQTHMLDVMQDHFSR_	P10909;P10909-2;P10909-4;P10909-5	-0.0387441	0.0387441	0.342235	0.132842	108	P10909;P10909-2;P10909-4;P10909-5	CLU	Clusterin;Isoform 2 of Clusterin;Isoform 4 of Clusterin;Isoform 5 of Clusterin	CLUS_HUMAN	1	-2.64979	0.973502	Dengue	QC	NaN	NaN	NaN	34.6148	0.140334
Dengue / QC	_VNVDEVGGEALGR_	P68871	-0.109114	0.109114	0.0392929	0.0220803	176	P68871	HBB	Hemoglobin subunit beta	HBB_HUMAN	1	-7.28426	0.927157	Dengue	QC	NaN	NaN	NaN	104.645	0.0647443
Dengue / QC	_MYYSAVDPTKDIFTGLIGPMK_	P00450	0.00184113	0.00184113	0.238782	0.0992129	172	P00450	CP	Ceruloplasmin	CERU_HUMAN	1	0.127699	1.00128	Dengue	QC	NaN	NaN	NaN	64.0829	0.113369
Dengue / QC	_RM[Oxidation (M)]PC[Carbamidomethyl (C)]AEDYLSVVLNQLC[Carbamidomethyl (C)]VLHEK_	P02768	-0.156795	0.156795	0.415964	0.155267	176	P02768	ALB	Serum albumin	ALBU_HUMAN	1	-10.2984	0.897016	Dengue	QC	NaN	NaN	NaN	72.6437	0.164683
Dengue / QC	_DVVLFEK_	P00747	-0.0509229	0.0509229	0.0374357	0.0211997	164	P00747	PLG	Plasminogen	PLMN_HUMAN	1	-3.46814	0.965319	Dengue	QC	NaN	NaN	NaN	105.514	0.0638381
Dengue / QC	_M[Oxidation (M)]EEMGSR_	P02649	-0.223873	0.223873	0.448298	0.16461	48	P02649	APOE	Apolipoprotein E	APOE_HUMAN	1	-14.3737	0.856263	Dengue	QC	NaN	NaN	NaN	16.2997	0.172844
Dengue / QC	_QELSEAEQATR_	P01024	-0.129825	0.129825	0.0798961	0.0401919	176	P01024	C3	Complement C3	CO3_HUMAN	1	-8.60576	0.913942	Dengue	QC	NaN	NaN	NaN	55.9046	0.0752779
Dengue / QC	_MRDVVLFEK_	P00747	-0.15043	0.15043	0.0250853	0.015035	176	P00747	PLG	Plasminogen	PLMN_HUMAN	1	-9.90178	0.900982	Dengue	QC	NaN	NaN	NaN	64.6349	0.0585447
Dengue / QC	_LGNNPVSK_	P04114	-0.115454	0.115454	0.189475	0.0819852	146	P04114	APOB	Apolipoprotein B-100	APOB_HUMAN	1	-7.69082	0.923092	Dengue	QC	NaN	NaN	NaN	54.6392	0.101015
Dengue / QC	_EQLGEFYEALDC[Carbamidomethyl (C)]LR_	P02763	-0.174926	0.174926	0.229705	0.0960992	174	P02763	ORM1	Alpha-1-acid glycoprotein 1	A1AG1_HUMAN	1	-11.4187	0.885813	Dengue	QC	NaN	NaN	NaN	89.1082	0.110933
Dengue / QC	_EC[Carbamidomethyl (C)]QGNGVWSGTEPIC[Carbamidomethyl (C)]R_	B4E1Z4	-0.0552991	0.0552991	0.0776138	0.0392078	146	B4E1Z4	NaN	cDNA FLJ55673, highly similar to Complement factor B (EC 3.4.21.47)	B4E1Z4_HUMAN	1	-3.76051	0.962395	Dengue	QC	NaN	NaN	NaN	62.6532	0.0747302
Dengue / QC	_SEGSSVNLSPPLEQC[Carbamidomethyl (C)]VPDR_	P00734	-0.188448	0.188448	0.101037	0.0489697	154	P00734	F2	Prothrombin	THRB_HUMAN	1	-12.2451	0.877549	Dengue	QC	NaN	NaN	NaN	60.6773	0.0805111
Dengue / QC	_ENFAGEATLQR_	P04114	-0.139208	0.139208	0.0512071	0.0276084	162	P04114	APOB	Apolipoprotein B-100	APOB_HUMAN	1	-9.19828	0.908017	Dengue	QC	NaN	NaN	NaN	120.656	0.0678476
Dengue / QC	_FSGSNSGNTATLTISR_	A0A075B6K5	-0.193734	0.193734	0.52494	0.186543	176	A0A075B6K5	IGLV3-9	Immunoglobulin lambda variable 3-9	LV39_HUMAN	1	-12.566	0.87434	Dengue	QC	NaN	NaN	NaN	54.0906	0.208719
Dengue / QC	_EIPAWVPFDPAAQITK_	P25311	-0.187467	0.187467	0.453298	0.16595	176	P25311	AZGP1	Zinc-alpha-2-glycoprotein	ZA2G_HUMAN	1	-12.1854	0.878146	Dengue	QC	NaN	NaN	NaN	60.2824	0.176814
Dengue / QC	_EDIVMTQTPLSLPVTPGEPASISC[Carbamidomethyl (C)]R_	A0A087X0Q4	-0.131477	0.131477	0.526597	0.18696	164	A0A087X0Q4	IGKV2-40	Immunoglobulin kappa variable 2-40	A0A087X0Q4_HUMAN	1	-8.71037	0.912896	Dengue	QC	NaN	NaN	NaN	38.1311	0.2086
Dengue / QC	_M[Oxidation (M)]YLGYEYVTAIR_	P02787	-0.0451811	0.0451811	0.387149	0.14653	176	P02787	TF	Serotransferrin	TRFE_HUMAN	1	-3.08319	0.969168	Dengue	QC	NaN	NaN	NaN	94.0243	0.153144
Dengue / QC	_GMDSC[Carbamidomethyl (C)]KGDSGGAFAVQDPNDKTK_	P09871	-0.115495	0.115495	0.14659	0.0665253	174	P09871	C1S	Complement C1s subcomponent	C1S_HUMAN	1	-7.69347	0.923065	Dengue	QC	NaN	NaN	NaN	50.284	0.0900659
Dengue / QC	_LLLQQVSLPELPGEYSMK_	P01023	-0.122987	0.122987	0.233982	0.0975065	176	P01023	A2M	Alpha-2-macroglobulin	A2MG_HUMAN	1	-8.17158	0.918284	Dengue	QC	NaN	NaN	NaN	131.448	0.111009
Dengue / QC	_VTGWGNLKETWTANVGK_	P00734	-0.129509	0.129509	0.0238382	0.0143892	144	P00734	F2	Prothrombin	THRB_HUMAN	1	-8.58577	0.914142	Dengue	QC	NaN	NaN	NaN	93.1006	0.0576606
Dengue / QC	_FWGFHDC[Carbamidomethyl (C)]THQEDVAVIC[Carbamidomethyl (C)]SG_	O43866	-0.139308	0.139308	0.160833	0.0717606	170	O43866	CD5L	CD5 antigen-like	CD5L_HUMAN	1	-9.20453	0.907955	Dengue	QC	NaN	NaN	NaN	93.3664	0.0933339
Dengue / QC	_DTSASTAYMELSSLR_	A0A0C4DH29	-0.136931	0.136931	0.42401	0.157506	140	A0A0C4DH29	IGHV1-3	Immunoglobulin heavy variable 1-3	HV103_HUMAN	1	-9.05483	0.909452	Dengue	QC	NaN	NaN	NaN	114.129	0.164158
Dengue / QC	_TLIYSTNTR_	A0A075B6I0	-0.059691	0.059691	0.286797	0.115591	168	A0A075B6I0	IGLV8-61	Immunoglobulin lambda variable 8-61	LV861_HUMAN	1	-4.05304	0.95947	Dengue	QC	NaN	NaN	NaN	65.888	0.122192
Dengue / QC	_VGLSGMAIADVTLLSGFHALR_	P0C0L5	0.484799	0.484799	0.564659	0.197771	142	P0C0L5	C4B	Complement C4-B	CO4B_HUMAN	1	39.9391	1.39939	Dengue	QC	NaN	NaN	NaN	32.191	0.225377
Dengue / QC	_LLIYDNNK_	P01701	-0.154416	0.154416	0.225587	0.094662	118	P01701	IGLV1-51	Immunoglobulin lambda variable 1-51	LV151_HUMAN	1	-10.1504	0.898496	Dengue	QC	NaN	NaN	NaN	93.5907	0.10746
Dengue / QC	_VTISVDTSKNQFSLK_	P06331	-0.02715	0.02715	0.308565	0.122492	170	P06331	IGHV4-34	Immunoglobulin heavy variable 4-34	HV434_HUMAN	1	-1.8643	0.981357	Dengue	QC	NaN	NaN	NaN	126.697	0.128171
Dengue / QC	_TTPPM[Oxidation (M)]LDSDGSFFLYSK_	P01859	-0.0585448	0.0585448	0.606656	0.209292	174	P01859	IGHG2	Immunoglobulin heavy constant gamma 2	IGHG2_HUMAN	1	-3.97678	0.960232	Dengue	QC	NaN	NaN	NaN	99.2412	0.253357
Dengue / QC	_GPEVQLVAHSPWLKDSLSR_	P0C0L5	-0.179322	0.179322	0.0743315	0.0377713	168	P0C0L5	C4B	Complement C4-B	CO4B_HUMAN	1	-11.6882	0.883118	Dengue	QC	NaN	NaN	NaN	108.137	0.0722805
Dengue / QC	_DSC[Carbamidomethyl (C)]VGSLVVK_	P01024	-0.130425	0.130425	0.0550231	0.0293368	176	P01024	C3	Complement C3	CO3_HUMAN	1	-8.64379	0.913562	Dengue	QC	NaN	NaN	NaN	51.3825	0.06626
Dengue / QC	_VEAEDVGVYYC[Carbamidomethyl (C)]MQR_	A0A087X0Q4	-0.132738	0.132738	0.120595	0.0566756	156	A0A087X0Q4	IGKV2-40	Immunoglobulin kappa variable 2-40	A0A087X0Q4_HUMAN	1	-8.7901	0.912099	Dengue	QC	NaN	NaN	NaN	79.0583	0.0826911
Dengue / QC	_VEPLRAELQEGAR_	P02647	-0.0949225	0.0949225	0.0532892	0.0285496	176	P02647	APOA1	Apolipoprotein A-I	APOA1_HUMAN	1	-6.36774	0.936323	Dengue	QC	NaN	NaN	NaN	72.6875	0.0660023
Dengue / QC	_SVSDGIAALDLNAVANK_	P04114	-0.175527	0.175527	0.211573	0.0897962	174	P04114	APOB	Apolipoprotein B-100	APOB_HUMAN	1	-11.4556	0.885444	Dengue	QC	NaN	NaN	NaN	73.2636	0.102532
Dengue / QC	_FRKPYNVESYTPQTQGK_	P07358	-0.0148627	0.0148627	0.181362	0.0791508	162	P07358	C8B	Complement component C8 beta chain	CO8B_HUMAN	1	-1.02491	0.989751	Dengue	QC	NaN	NaN	NaN	56.4667	0.0953809
Dengue / QC	_DTSTSTVYMELSSLR_	P01743	-0.0933317	0.0933317	0.319905	0.126074	162	P01743	IGHV1-46	Immunoglobulin heavy variable 1-46	HV146_HUMAN	1	-6.26444	0.937356	Dengue	QC	NaN	NaN	NaN	68.54	0.12858
Dengue / QC	_NTLYLQMNSLK_	A0A0B4J1V0	-0.0947081	0.0947081	0.121398	0.0569811	146	A0A0B4J1V0	IGHV3-15	Immunoglobulin heavy variable 3-15	HV315_HUMAN	1	-6.35383	0.936462	Dengue	QC	NaN	NaN	NaN	120.453	0.0825791
Dengue / QC	_EIQNAVNGVK_	P10909;P10909-2;P10909-4;P10909-5	-0.144571	0.144571	0.108198	0.0517709	156	P10909;P10909-2;P10909-4;P10909-5	CLU	Clusterin;Isoform 2 of Clusterin;Isoform 4 of Clusterin;Isoform 5 of Clusterin	CLUS_HUMAN	1	-9.53514	0.904649	Dengue	QC	NaN	NaN	NaN	86.1343	0.0793502
Dengue / QC	_FAFNLYR_	P05546	-0.0128911	0.0128911	0.683947	0.229814	36	P05546	SERPIND1	Heparin cofactor 2	HEP2_HUMAN	1	-0.889561	0.991104	Dengue	QC	NaN	NaN	NaN	4.20511	0.294416
Dengue / QC	_KEAGIPEFYDYDVALIK_	B4E1Z4	-0.107055	0.107055	0.29858	0.119258	166	B4E1Z4	NaN	cDNA FLJ55673, highly similar to Complement factor B (EC 3.4.21.47)	B4E1Z4_HUMAN	1	-7.15185	0.928482	Dengue	QC	NaN	NaN	NaN	59.1544	0.122285
Dengue / QC	_DQLTC[Carbamidomethyl (C)]NKFDLK_	P01024	-0.181968	0.181968	0.0321992	0.0186199	174	P01024	C3	Complement C3	CO3_HUMAN	1	-11.85	0.8815	Dengue	QC	NaN	NaN	NaN	71.3515	0.0586818
Dengue / QC	_GSQTQSHPDLGTEGC[Carbamidomethyl (C)]WDQLSAPR_	Q96PD5	-0.110706	0.110706	0.168773	0.0746067	176	Q96PD5	PGLYRP2	N-acetylmuramoyl-L-alanine amidase	PGRP2_HUMAN	1	-7.38653	0.926135	Dengue	QC	NaN	NaN	NaN	56.2474	0.0919207
Dengue / QC	_SDVMYTDWKK_	P19652	-0.114903	0.114903	0.129591	0.0600885	176	P19652	ORM2	Alpha-1-acid glycoprotein 2	A1AG2_HUMAN	1	-7.65556	0.923444	Dengue	QC	NaN	NaN	NaN	83.9732	0.0836609
Dengue / QC	_IYHSHIDAPKDIASGLIGPLIIC[Carbamidomethyl (C)]KK_	P00450	-0.0363488	0.0363488	0.624945	0.214416	174	P00450	CP	Ceruloplasmin	CERU_HUMAN	1	-2.48803	0.97512	Dengue	QC	NaN	NaN	NaN	62.9489	0.260317
Dengue / QC	_ASQGISSYLAWYQQKPGKAPK_	A0A0C4DH67	0.0544931	0.0544931	0.418895	0.156148	134	A0A0C4DH67	IGKV1-8	Immunoglobulin kappa variable 1-8	KV108_HUMAN	1	3.84941	1.03849	Dengue	QC	NaN	NaN	NaN	87.2279	0.156749
Dengue / QC	_ITDNMFC[Carbamidomethyl (C)]AGYKPDEGK_	P00734	-0.126384	0.126384	0.0949959	0.04655	162	P00734	F2	Prothrombin	THRB_HUMAN	1	-8.38755	0.916124	Dengue	QC	NaN	NaN	NaN	60.9779	0.0750039
Dengue / QC	_QC[Carbamidomethyl (C)]GHQISAC[Carbamidomethyl (C)]HR_	H0YAC1;P03952	-0.239808	0.239808	0.531403	0.188307	26	H0YAC1;P03952	KLKB1	Plasma kallikrein (Fragment);Plasma kallikrein	H0YAC1_HUMAN;KLKB1_HUMAN	1	-15.3142	0.846858	Dengue	QC	NaN	NaN	NaN	3.85672	0.185252
Dengue / QC	_LPVAPLR_	P09871	-0.200741	0.200741	0.169482	0.0748784	118	P09871	C1S	Complement C1s subcomponent	C1S_HUMAN	1	-12.9896	0.870104	Dengue	QC	NaN	NaN	NaN	35.0992	0.0905406
Dengue / QC	_SKDHEELSLVASEAVR_	A0A087WSY5;Q96IY4	-0.0907148	0.0907148	0.177817	0.0778631	150	A0A087WSY5;Q96IY4	CPB2	Carboxypeptidase B2	A0A087WSY5_HUMAN;CBPB2_HUMAN	1	-6.09426	0.939057	Dengue	QC	NaN	NaN	NaN	48.5773	0.0924478
Dengue / QC	_ANAGKPKDPTFIPAPIQAK_	P01019	-0.0704906	0.0704906	0.262025	0.107218	176	P01019	AGT	Angiotensinogen	ANGT_HUMAN	1	-4.76859	0.952314	Dengue	QC	NaN	NaN	NaN	60.4968	0.11151
Dengue / QC	_GGGALLGDR_	B4DPQ0	-0.0901046	0.0901046	0.140095	0.064104	138	B4DPQ0	C1R	Complement C1r subcomponent	B4DPQ0_HUMAN	1	-6.05454	0.939455	Dengue	QC	NaN	NaN	NaN	48.3488	0.0840767
Dengue / QC	_VFC[Carbamidomethyl (C)]QPWQR_	E7ETH0;G3XAM2;P05156	-0.111678	0.111678	0.0511639	0.0275902	142	E7ETH0;G3XAM2;P05156	CFI	Complement factor I	E7ETH0_HUMAN;G3XAM2_HUMAN;CFAI_HUMAN	1	-7.44889	0.925511	Dengue	QC	NaN	NaN	NaN	63.2234	0.0633646
Dengue / QC	_YLFLNGNK_	P02750	-0.025202	0.025202	0.234045	0.0975256	136	P02750	LRG1	Leucine-rich alpha-2-glycoprotein	A2GL_HUMAN	1	-1.7317	0.982683	Dengue	QC	NaN	NaN	NaN	83.5331	0.105003
Dengue / QC	_DNAKNTLYLQMNSLR_	A0A075B7E8	-0.474955	0.474955	0.611172	0.210535	160	A0A075B7E8	IGHV3OR16-13	Immunoglobulin heavy variable 3/OR16-13 (non-functional) (Fragment)	A0A075B7E8_HUMAN	1	-28.0511	0.719489	Dengue	QC	NaN	NaN	NaN	55.8824	0.245414
Dengue / QC	_C[Carbamidomethyl (C)]VPVC[Carbamidomethyl (C)]GVPREPFEEK_	P09871	-0.0594921	0.0594921	0.20268	0.0866782	166	P09871	C1S	Complement C1s subcomponent	C1S_HUMAN	1	-4.03981	0.959602	Dengue	QC	NaN	NaN	NaN	47.4788	0.0969534
Dengue / QC	_AVLYNYRQNQELK_	P01024	-0.0658597	0.0658597	0.0761013	0.0385551	176	P01024	C3	Complement C3	CO3_HUMAN	1	-4.46242	0.955376	Dengue	QC	NaN	NaN	NaN	64.1709	0.0684444
Dengue / QC	_KPYNVESYTPQTQGK_	P07358	-0.138166	0.138166	0.327107	0.128168	132	P07358	C8B	Complement component C8 beta chain	CO8B_HUMAN	1	-9.13262	0.908674	Dengue	QC	NaN	NaN	NaN	52.0448	0.124412
Dengue / QC	_VILGAHQEVNLEPHVQEIEVSR_	P00747	-0.188047	0.188047	0.241861	0.100247	176	P00747	PLG	Plasminogen	PLMN_HUMAN	1	-12.2207	0.877793	Dengue	QC	NaN	NaN	NaN	58.591	0.103646
Dengue / QC	_VTMTEDTSTDTAYMELSSLR_	A0A0C4DH33	-0.00397997	0.00397997	0.247304	0.102063	168	A0A0C4DH33	IGHV1-24	Immunoglobulin heavy variable 1-24	HV124_HUMAN	1	-0.275491	0.997245	Dengue	QC	NaN	NaN	NaN	90.7773	0.105091
Dengue / QC	_KMTSNFPVDLSDYPK_	P04114	-0.187378	0.187378	0.0907131	0.0447822	160	P04114	APOB	Apolipoprotein B-100	APOB_HUMAN	1	-12.18	0.8782	Dengue	QC	NaN	NaN	NaN	65.4955	0.0712545
Dengue / QC	_M[Oxidation (M)]PC[Carbamidomethyl (C)]AEDYLSVVLNQLC[Carbamidomethyl (C)]VLHEK_	P02768	0.198198	0.198198	0.609963	0.210153	172	P02768	ALB	Serum albumin	ALBU_HUMAN	1	14.7264	1.14726	Dengue	QC	NaN	NaN	NaN	32.1476	0.237272
Dengue / QC	_NKFDPSLTQR_	P08697	-0.123742	0.123742	0.145807	0.0662292	176	P08697	SERPINF2	Alpha-2-antiplasmin	A2AP_HUMAN	1	-8.21959	0.917804	Dengue	QC	NaN	NaN	NaN	66.0116	0.0828608
Dengue / QC	_YYSYYC[Carbamidomethyl (C)]DEHFETPSGSYWDHIHC[Carbamidomethyl (C)]TQDGWSPAVPC[Carbamidomethyl (C)]LRK_	P08603	-0.516873	0.516873	0.658328	0.223221	52	P08603	CFH	Complement factor H	CFAH_HUMAN	1	-30.1115	0.698885	Dengue	QC	NaN	NaN	NaN	5.68361	0.261487
Dengue / QC	_VTTSQDMLSIMEK_	P05155;P05155-3	-0.127983	0.127983	0.112944	0.0536811	160	P05155;P05155-3	SERPING1	Plasma protease C1 inhibitor;Isoform 3 of Plasma protease C1 inhibitor	IC1_HUMAN	1	-8.48898	0.91511	Dengue	QC	NaN	NaN	NaN	89.7236	0.076074
Dengue / QC	_HKGKYEMYLK_	Q06033;Q06033-2	-0.0190867	0.0190867	0.491676	0.177034	60	Q06033;Q06033-2	ITIH3	Inter-alpha-trypsin inhibitor heavy chain H3;Isoform 2 of Inter-alpha-trypsin inhibitor heavy chain H3	ITIH3_HUMAN	1	-1.31427	0.986857	Dengue	QC	NaN	NaN	NaN	20.618	0.173915
Dengue / QC	_QYAYWYQQK_	P01717	-0.218002	0.218002	0.336037	0.130929	122	P01717	IGLV3-25	Immunoglobulin lambda variable 3-25	LV325_HUMAN	1	-14.0245	0.859755	Dengue	QC	NaN	NaN	NaN	113.206	0.126011
Dengue / QC	_LSC[Carbamidomethyl (C)]SYSHWSAPAPQC[Carbamidomethyl (C)]K_	P04003	-0.0657953	0.0657953	0.184835	0.0803572	174	P04003	C4BPA	C4b-binding protein alpha chain	C4BPA_HUMAN	1	-4.45815	0.955418	Dengue	QC	NaN	NaN	NaN	42.4531	0.090256
Dengue / QC	_ALVLIAFAQYLQQC[Carbamidomethyl (C)]PFEDHVK_	P02768	0.0682322	0.0682322	0.422413	0.157088	176	P02768	ALB	Serum albumin	ALBU_HUMAN	1	4.84312	1.04843	Dengue	QC	NaN	NaN	NaN	44.2272	0.150227
Dengue / QC	_KSVIPSDGPSVAC[Carbamidomethyl (C)]VK_	C9JB55	-0.0889858	0.0889858	0.347439	0.134448	154	C9JB55	TF	Serotransferrin (Fragment)	C9JB55_HUMAN	1	-5.98166	0.940183	Dengue	QC	NaN	NaN	NaN	43.4166	0.127667
Dengue / QC	_KDTVIKPLLVEPEGLEK_	P01023	-0.129197	0.129197	0.189507	0.0819926	170	P01023	A2M	Alpha-2-macroglobulin	A2MG_HUMAN	1	-8.566	0.91434	Dengue	QC	NaN	NaN	NaN	89.9104	0.0913616
Dengue / QC	_IQALSLC[Carbamidomethyl (C)]SDQQSHLEFR_	P07225	-0.0676922	0.0676922	0.264059	0.107913	148	P07225	PROS1	Vitamin K-dependent protein S	PROS_HUMAN	1	-4.58369	0.954163	Dengue	QC	NaN	NaN	NaN	56.4933	0.106877
Dengue / QC	_DIPMNPM[Oxidation (M)]C[Carbamidomethyl (C)]IYR_	P01008	-0.104006	0.104006	0.269474	0.109814	80	P01008	SERPINC1	Antithrombin-III	ANT3_HUMAN	1	-6.95544	0.930446	Dengue	QC	NaN	NaN	NaN	22.8577	0.106347
Dengue / QC	_IYISGM[Oxidation (M)]APRPSLAK_	P04004	0.044239	0.044239	0.321042	0.126427	126	P04004	VTN	Vitronectin	VTNC_HUMAN	1	3.11391	1.03114	Dengue	QC	NaN	NaN	NaN	61.7772	0.120225
Dengue / QC	_RHQQTVTIPPK_	P01024	-0.131717	0.131717	0.427404	0.158481	170	P01024	C3	Complement C3	CO3_HUMAN	1	-8.72557	0.912744	Dengue	QC	NaN	NaN	NaN	49.5937	0.150026
Dengue / QC	_VVSVLTVLHQDWLNGKEYK_	P01857	-0.22458	0.22458	0.34521	0.133736	176	P01857	IGHG1	Immunoglobulin heavy constant gamma 1	IGHG1_HUMAN	1	-14.4156	0.855844	Dengue	QC	NaN	NaN	NaN	72.0813	0.125797
Dengue / QC	_HQDFNSAVQLVENFC[Carbamidomethyl (C)]R_	P00734	-0.142424	0.142424	0.197771	0.0849228	176	P00734	F2	Prothrombin	THRB_HUMAN	1	-9.40042	0.905996	Dengue	QC	NaN	NaN	NaN	77.0194	0.0919395
Dengue / QC	_HAFILQDTK_	B4E1Z4	-0.0645991	0.0645991	0.124182	0.0580232	170	B4E1Z4	NaN	cDNA FLJ55673, highly similar to Complement factor B (EC 3.4.21.47)	B4E1Z4_HUMAN	1	-4.3789	0.956211	Dengue	QC	NaN	NaN	NaN	57.5926	0.0760217
Dengue / QC	_AIGYLNTGYQR_	P01023	-0.0854654	0.0854654	0.241323	0.100053	176	P01023	A2M	Alpha-2-macroglobulin	A2MG_HUMAN	1	-5.75196	0.94248	Dengue	QC	NaN	NaN	NaN	62.9108	0.100169
Dengue / QC	_RPPGFSPFR_	P01042	-0.116712	0.116712	0.174919	0.0768684	176	P01042	KNG1	Kininogen-1	KNG1_HUMAN	1	-7.77126	0.922287	Dengue	QC	NaN	NaN	NaN	77.817	0.0865362
Dengue / QC	_VLLDGVQNPR_	P01024	-0.0634033	0.0634033	0.231001	0.0965084	176	P01024	C3	Complement C3	CO3_HUMAN	1	-4.29961	0.957004	Dengue	QC	NaN	NaN	NaN	49.555	0.0976786
Dengue / QC	_LLLPGELAK_	O60814;P06899;P23527;P33778;P57053;P58876;P62807;Q16778;Q5QNW6;Q5QNW6-2;Q8N257;Q93079;Q99877;Q99879;Q99880;U3KQK0	-0.100518	0.100518	0.553423	0.194461	98	O60814;P06899;P23527;P33778;P57053;P58876;P62807;Q16778;Q5QNW6;Q5QNW6-2;Q8N257;Q93079;Q99877;Q99879;Q99880;U3KQK0	HIST1H2BK;HIST1H2BJ;HIST1H2BO;HIST1H2BB;H2BFS;HIST1H2BD;HIST1H2BC;HIST2H2BE;HIST2H2BF;HIST2H2BF;HIST3H2BB;HIST1H2BH;HIST1H2BN;HIST1H2BM;HIST1H2BL;HIST1H2BN	Histone H2B type 1-K;Histone H2B type 1-J;Histone H2B type 1-O;Histone H2B type 1-B;Histone H2B type F-S;Histone H2B type 1-D;Histone H2B type 1-C/E/F/G/I;Histone H2B type 2-E;Histone H2B type 2-F;Isoform 2 of Histone H2B type 2-F;Histone H2B type 3-B;Histone H2B type 1-H;Histone H2B type 1-N;Histone H2B type 1-M;Histone H2B type 1-L;Histone H2B	H2B1K_HUMAN;H2B1J_HUMAN;H2B1O_HUMAN;H2B1B_HUMAN;H2BFS_HUMAN;H2B1D_HUMAN;H2B1C_HUMAN;H2B2E_HUMAN;H2B2F_HUMAN;H2B2F_HUMAN;H2B3B_HUMAN;H2B1H_HUMAN;H2B1N_HUMAN;H2B1M_HUMAN;H2B1L_HUMAN;U3KQK0_HUMAN	1	-6.73021	0.932698	Dengue	QC	NaN	NaN	NaN	78.5629	0.198788
Dengue / QC	_NMEQFQVSVSVAPNAK_	Q14624	-0.134338	0.134338	0.140479	0.0642283	172	Q14624	ITIH4	Inter-alpha-trypsin inhibitor heavy chain H4	ITIH4_HUMAN	1	-8.89121	0.911088	Dengue	QC	NaN	NaN	NaN	53.7301	0.0790796
Dengue / QC	_LGMFNIQHC[Carbamidomethyl (C)]K_	P01009	-0.0804687	0.0804687	0.103523	0.0499356	176	P01009	SERPINA1	Alpha-1-antitrypsin	A1AT_HUMAN	1	-5.42496	0.94575	Dengue	QC	NaN	NaN	NaN	66.4609	0.0711766
Dengue / QC	_LVDEDMNSFKADVK_	Q06033;Q06033-2	-0.124877	0.124877	0.274672	0.11161	140	Q06033;Q06033-2	ITIH3	Inter-alpha-trypsin inhibitor heavy chain H3;Isoform 2 of Inter-alpha-trypsin inhibitor heavy chain H3	ITIH3_HUMAN	1	-8.2918	0.917082	Dengue	QC	NaN	NaN	NaN	52.2598	0.10638
Dengue / QC	_TDRFLVNLVK_	P43652	-0.0657531	0.0657531	0.486354	0.175567	64	P43652	AFM	Afamin	AFAM_HUMAN	1	-4.45536	0.955446	Dengue	QC	NaN	NaN	NaN	13.1036	0.163916
Dengue / QC	_ATPSVTLFPPSSEELQANK_	P15814	-0.218585	0.218585	0.192303	0.0829287	168	P15814	IGLL1	Immunoglobulin lambda-like polypeptide 1	IGLL1_HUMAN	1	-14.0592	0.859408	Dengue	QC	NaN	NaN	NaN	104.646	0.0891571
Dengue / QC	_AVMDDFAAFVEKC[Carbamidomethyl (C)]C[Carbamidomethyl (C)]K_	P02768	0.0241029	0.0241029	0.326449	0.128006	166	P02768	ALB	Serum albumin	ALBU_HUMAN	1	1.68472	1.01685	Dengue	QC	NaN	NaN	NaN	86.4734	0.118364
Dengue / QC	_GEVQAMLGQSTEELR_	P02649	-0.19593	0.19593	0.277472	0.112589	134	P02649	APOE	Apolipoprotein E	APOE_HUMAN	1	-12.699	0.87301	Dengue	QC	NaN	NaN	NaN	79.3352	0.10664
Dengue / QC	_QNDFNSVEEK_	P10643	-0.0514823	0.0514823	0.465768	0.169654	176	P10643	C7	Complement component C7	CO7_HUMAN	1	-3.50556	0.964944	Dengue	QC	NaN	NaN	NaN	51.2793	0.158438
Dengue / QC	_MPC[Carbamidomethyl (C)]AEDYLSVVLNQLC[Carbamidomethyl (C)]VLHEKTPVSDR_	P02768	0.282914	0.282914	0.641786	0.21908	176	P02768	ALB	Serum albumin	ALBU_HUMAN	1	21.665	1.21665	Dengue	QC	NaN	NaN	NaN	31.0487	0.247553
Dengue / QC	_DTWVEHWPEEDEC[Carbamidomethyl (C)]QDEENQK_	P01024	-0.0828068	0.0828068	0.122781	0.057499	168	P01024	C3	Complement C3	CO3_HUMAN	1	-5.57811	0.944219	Dengue	QC	NaN	NaN	NaN	68.2254	0.0740786
Dengue / QC	_HLYVLEFSDHPGIHEPLEPEVK_	P15169	-0.13521	0.13521	0.485602	0.175362	164	P15169	CPN1	Carboxypeptidase N catalytic chain	CBPN_HUMAN	1	-8.94629	0.910537	Dengue	QC	NaN	NaN	NaN	42.65	0.164409
Dengue / QC	_GTSQNDPNWVVR_	P07996	-0.0875397	0.0875397	0.0787676	0.0397003	166	P07996	THBS1	Thrombospondin-1	TSP1_HUMAN	1	-5.88736	0.941126	Dengue	QC	NaN	NaN	NaN	94.6188	0.0650676
Dengue / QC	_QTEATMTFK_	P04114	-0.0827672	0.0827672	0.0911174	0.0449395	174	P04114	APOB	Apolipoprotein B-100	APOB_HUMAN	1	-5.57553	0.944245	Dengue	QC	NaN	NaN	NaN	90.5699	0.067647
Dengue / QC	_QYTDSTFRVPVER_	P00450	-0.123275	0.123275	0.154603	0.0694264	176	P00450	CP	Ceruloplasmin	CERU_HUMAN	1	-8.18989	0.918101	Dengue	QC	NaN	NaN	NaN	80.6587	0.0803571
Dengue / QC	_RDGYLFQLLR_	P04196	-0.00413519	0.00413519	0.340821	0.132445	176	P04196	HRG	Histidine-rich glycoprotein	HRG_HUMAN	1	-0.286219	0.997138	Dengue	QC	NaN	NaN	NaN	53.9728	0.120011
Dengue / QC	_AGDTAVYYC[Carbamidomethyl (C)]AR_	P01766	-0.103905	0.103905	0.12411	0.0580037	176	P01766	IGHV3-13	Immunoglobulin heavy variable 3-13	HV313_HUMAN	1	-6.94888	0.930511	Dengue	QC	NaN	NaN	NaN	100.488	0.0743126
Dengue / QC	_DGNDHSLWR_	B4E1Z4	-0.0467491	0.0467491	0.0827632	0.0414103	144	B4E1Z4	NaN	cDNA FLJ55673, highly similar to Complement factor B (EC 3.4.21.47)	B4E1Z4_HUMAN	1	-3.18846	0.968115	Dengue	QC	NaN	NaN	NaN	66.5032	0.0654012
Dengue / QC	_LPNNVLQEK_	P43652	-0.112679	0.112679	0.215321	0.0910987	168	P43652	AFM	Afamin	AFAM_HUMAN	1	-7.5131	0.924869	Dengue	QC	NaN	NaN	NaN	60.3732	0.0919198
Dengue / QC	_WGAAPYR_	Q96PD5	-0.0662799	0.0662799	0.195712	0.0841601	150	Q96PD5	PGLYRP2	N-acetylmuramoyl-L-alanine amidase	PGRP2_HUMAN	1	-4.49024	0.955098	Dengue	QC	NaN	NaN	NaN	35.3348	0.0870363
Dengue / QC	_SKFSPENTRK_	P01008	0.250185	0.250185	0.804104	0.259243	54	P01008	SERPINC1	Antithrombin-III	ANT3_HUMAN	1	18.9359	1.18936	Dengue	QC	NaN	NaN	NaN	9.15536	0.449025
Dengue / QC	_LPGIVAEGRDDLYVSDAFHK_	P01008	-0.155414	0.155414	0.278368	0.112905	164	P01008	SERPINC1	Antithrombin-III	ANT3_HUMAN	1	-10.2125	0.897875	Dengue	QC	NaN	NaN	NaN	36.3255	0.10401
Dengue / QC	_IRYYTYLIM[Oxidation (M)]NK_	P01024	-0.0270124	0.0270124	0.759611	0.248537	118	P01024	C3	Complement C3	CO3_HUMAN	1	-1.85493	0.981451	Dengue	QC	NaN	NaN	NaN	33.2871	0.370955
Dengue / QC	_C[Carbamidomethyl (C)]TEGFNVDKK_	P04004	0.721029	0.721029	0.795217	0.257169	146	P04004	VTN	Vitronectin	VTNC_HUMAN	1	64.8357	1.64836	Dengue	QC	NaN	NaN	NaN	17.4054	0.43373
Dengue / QC	_GAEDSLADQAANKWGR_	P0DJI9	-0.0186624	0.0186624	0.524931	0.186543	86	P0DJI9	SAA2	Serum amyloid A-2 protein	SAA2_HUMAN	1	-1.28525	0.987148	Dengue	QC	NaN	NaN	NaN	62.0613	0.178736
Dengue / QC	_ITQDAQLK_	P08185	0.0801667	0.0801667	0.0930344	0.0457354	152	P08185	SERPINA6	Corticosteroid-binding globulin	CBG_HUMAN	1	5.71401	1.05714	Dengue	QC	NaN	NaN	NaN	67.2177	0.0670475
Dengue / QC	_EAQLPVIENK_	P00747	-0.105637	0.105637	0.0526193	0.0282379	176	P00747	PLG	Plasminogen	PLMN_HUMAN	1	-7.06054	0.929395	Dengue	QC	NaN	NaN	NaN	56.6297	0.0574709
Dengue / QC	_STGSWSTLK_	B4E1Z4	-0.0937401	0.0937401	0.191811	0.0827909	176	B4E1Z4	NaN	cDNA FLJ55673, highly similar to Complement factor B (EC 3.4.21.47)	B4E1Z4_HUMAN	1	-6.29097	0.93709	Dengue	QC	NaN	NaN	NaN	60.2401	0.0859116
Dengue / QC	_SPTLGASNR_	P05164;P05164-2;P05164-3	0.706755	0.706755	0.839995	0.267807	18	P05164;P05164-2;P05164-3	MPO	Myeloperoxidase;Isoform H14 of Myeloperoxidase;Isoform H7 of Myeloperoxidase	PERM_HUMAN	1	63.2129	1.63213	Dengue	QC	NaN	NaN	NaN	3.87829	0.525222
Dengue / QC	_TDAPDLPEENQAR_	P01031	-0.115819	0.115819	0.287089	0.115686	176	P01031	C5	Complement C5	CO5_HUMAN	1	-7.71414	0.922859	Dengue	QC	NaN	NaN	NaN	62.3655	0.105575
Dengue / QC	_QAVDTAVDGVFIR_	P19827	-0.0721352	0.0721352	0.343821	0.133299	176	P19827	ITIH1	Inter-alpha-trypsin inhibitor heavy chain H1	ITIH1_HUMAN	1	-4.87709	0.951229	Dengue	QC	NaN	NaN	NaN	46.9452	0.118516
Dengue / QC	_LDELRDEGK_	P02768	0.00697637	0.00697637	0.176499	0.0774083	176	P02768	ALB	Serum albumin	ALBU_HUMAN	1	0.484736	1.00485	Dengue	QC	NaN	NaN	NaN	45.6649	0.0822005
Dengue / QC	_IIGGSDADIK_	P09871	0.644317	0.644317	0.858632	0.27229	52	P09871	C1S	Complement C1s subcomponent	C1S_HUMAN	1	56.2999	1.563	Dengue	QC	NaN	NaN	NaN	7.10141	0.608061
Dengue / QC	_KDSGFQMNQLR_	P02787	-0.0531278	0.0531278	0.0950568	0.0465697	176	P02787	TF	Serotransferrin	TRFE_HUMAN	1	-3.61556	0.963844	Dengue	QC	NaN	NaN	NaN	51.4584	0.0660267
Dengue / QC	_GEFYIGSK_	P00450	-0.178211	0.178211	0.406343	0.152337	92	P00450	CP	Ceruloplasmin	CERU_HUMAN	1	-11.6202	0.883798	Dengue	QC	NaN	NaN	NaN	32.6281	0.133228
Dengue / QC	_QWAGLVEK_	P02649	-0.0798079	0.0798079	0.118935	0.0560529	150	P02649	APOE	Apolipoprotein E	APOE_HUMAN	1	-5.38164	0.946184	Dengue	QC	NaN	NaN	NaN	65.0633	0.0707529
Dengue / QC	_VSTAFVYTK_	P04114	-0.143251	0.143251	0.0632424	0.0329548	174	P04114	APOB	Apolipoprotein B-100	APOB_HUMAN	1	-9.45238	0.905476	Dengue	QC	NaN	NaN	NaN	111.787	0.0595546
Dengue / QC	_TFKDLHFLEELQLGHNR_	P35858;P35858-2	0.290411	0.290411	0.837616	0.267161	88	P35858;P35858-2	IGFALS	Insulin-like growth factor-binding protein complex acid labile subunit;Isoform 2 of Insulin-like growth factor-binding protein complex acid labile subunit	ALS_HUMAN	1	22.2989	1.22299	Dengue	QC	NaN	NaN	NaN	15.0984	0.535125
Dengue / QC	_RQGALELIK_	P01024	-0.073796	0.073796	0.263399	0.107674	156	P01024	C3	Complement C3	CO3_HUMAN	1	-4.98653	0.950135	Dengue	QC	NaN	NaN	NaN	60.7971	0.0985925
Dengue / QC	_NGVAQEPVHLDSPAIK_	P04217	-0.136708	0.136708	0.126244	0.0587772	174	P04217	A1BG	Alpha-1B-glycoprotein	A1BG_HUMAN	1	-9.04078	0.909592	Dengue	QC	NaN	NaN	NaN	55.6125	0.0714471
Dengue / QC	_TWYPEVPKC[Carbamidomethyl (C)]EWETPEGC[Carbamidomethyl (C)]EQVLTGKR_	P04003	-0.123449	0.123449	0.395365	0.149014	170	P04003	C4BPA	C4b-binding protein alpha chain	C4BPA_HUMAN	1	-8.20098	0.91799	Dengue	QC	NaN	NaN	NaN	50.7155	0.129278
Dengue / QC	_DYAEVGR_	P00738	-0.171414	0.171414	0.38282	0.145234	160	P00738	HP	Haptoglobin	HPT_HUMAN	1	-11.2028	0.887972	Dengue	QC	NaN	NaN	NaN	56.201	0.125914
Dengue / QC	_AYSLFSYNTQGRDNELLVYKER_	P02743	-0.0830881	0.0830881	0.34535	0.133781	172	P02743	APCS	Serum amyloid P-component	SAMP_HUMAN	1	-5.59653	0.944035	Dengue	QC	NaN	NaN	NaN	60.8651	0.11628
Dengue / QC	_ATEHLSTLSEK_	P02647	0.0614151	0.0614151	0.518224	0.184722	176	P02647	APOA1	Apolipoprotein A-I	APOA1_HUMAN	1	4.34888	1.04349	Dengue	QC	NaN	NaN	NaN	32.3851	0.168596
Dengue / QC	_AVGDKLPEC[Carbamidomethyl (C)]EAVC[Carbamidomethyl (C)]GK_	P00738	-0.107664	0.107664	0.15737	0.0704768	174	P00738	HP	Haptoglobin	HPT_HUMAN	1	-7.19105	0.92809	Dengue	QC	NaN	NaN	NaN	90.0601	0.0771667
Dengue / QC	_DRLDEVKEQVAEVR_	P02649	-0.137774	0.137774	0.270038	0.110021	154	P02649	APOE	Apolipoprotein E	APOE_HUMAN	1	-9.10797	0.90892	Dengue	QC	NaN	NaN	NaN	71.6817	0.0984468
Dengue / QC	_FPKAEFAEVSK_	P02768	-0.120846	0.120846	0.16045	0.0716405	176	P02768	ALB	Serum albumin	ALBU_HUMAN	1	-8.03519	0.919648	Dengue	QC	NaN	NaN	NaN	67.0373	0.0769833
Dengue / QC	_DKHADPDFTR_	P19823	-0.0748932	0.0748932	0.433778	0.160391	106	P19823	ITIH2	Inter-alpha-trypsin inhibitor heavy chain H2	ITIH2_HUMAN	1	-5.05876	0.949412	Dengue	QC	NaN	NaN	NaN	75.0341	0.137669
Dengue / QC	_TSTSEEVC[Carbamidomethyl (C)]SFYLK_	P01031	-0.0929265	0.0929265	0.163105	0.0725809	170	P01031	C5	Complement C5	CO5_HUMAN	1	-6.23811	0.937619	Dengue	QC	NaN	NaN	NaN	75.4338	0.0769086
Dengue / QC	_SSGWHFVVK_	P10643	-0.125725	0.125725	0.391847	0.147978	166	P10643	C7	Complement component C7	CO7_HUMAN	1	-8.34564	0.916544	Dengue	QC	NaN	NaN	NaN	65.1654	0.125258
Dengue / QC	_SHSTQTLTC[Carbamidomethyl (C)]NSDGEWVYNTFC[Carbamidomethyl (C)]IYKR_	P04003	-0.123407	0.123407	0.485481	0.17534	174	P04003	C4BPA	C4b-binding protein alpha chain	C4BPA_HUMAN	1	-8.19827	0.918017	Dengue	QC	NaN	NaN	NaN	50.3331	0.153628
Dengue / QC	_QYNVGPSVSKYPLR_	P02751;P02751-15;P02751-3;P02751-7	-0.0660658	0.0660658	0.318801	0.125751	174	P02751;P02751-15;P02751-3;P02751-7	FN1	Fibronectin;Isoform 15 of Fibronectin;Isoform 3 of Fibronectin;Isoform 7 of Fibronectin	FINC_HUMAN	1	-4.47606	0.955239	Dengue	QC	NaN	NaN	NaN	58.1288	0.107111
Dengue / QC	_SC[Carbamidomethyl (C)]DTPPPC[Carbamidomethyl (C)]PR_	P01860	-0.124282	0.124282	0.493997	0.177748	176	P01860	IGHG3	Immunoglobulin heavy constant gamma 3	IGHG3_HUMAN	1	-8.25395	0.91746	Dengue	QC	NaN	NaN	NaN	81.5207	0.156644
Dengue / QC	_HQTVPQNTGGKNPDPWAK_	P02787	-0.0993154	0.0993154	0.320962	0.126404	176	P02787	TF	Serotransferrin	TRFE_HUMAN	1	-6.65242	0.933476	Dengue	QC	NaN	NaN	NaN	53.6067	0.107258
Dengue / QC	_FLVNLVK_	P43652	-0.167666	0.167666	0.202511	0.0866191	152	P43652	AFM	Afamin	AFAM_HUMAN	1	-10.9718	0.890282	Dengue	QC	NaN	NaN	NaN	112.504	0.0837607
Dengue / QC	_DDSKNTAYLQMNSLK_	A0A0B4J1V6	0.0928168	0.0928168	0.310485	0.123085	92	A0A0B4J1V6	IGHV3-73	Immunoglobulin heavy variable 3-73	HV373_HUMAN	1	6.64504	1.06645	Dengue	QC	NaN	NaN	NaN	59.4502	0.104305
Dengue / QC	_YKSDSDKQQGSGVPSR_	A0A0G2JS06	-0.0948903	0.0948903	0.486411	0.175577	142	A0A0G2JS06	IGLV5-39	Immunoglobulin lambda variable 5-39	LV539_HUMAN	1	-6.36565	0.936343	Dengue	QC	NaN	NaN	NaN	61.9197	0.15237
Dengue / QC	_FGLLDEDGK_	P0C0L5	-0.124206	0.124206	0.169679	0.0749365	152	P0C0L5	C4B	Complement C4-B	CO4B_HUMAN	1	-8.24912	0.917509	Dengue	QC	NaN	NaN	NaN	93.9731	0.0768881
Dengue / QC	_NGQWSEPPK_	P08603	-0.0633254	0.0633254	0.163326	0.0726535	164	P08603	CFH	Complement factor H	CFAH_HUMAN	1	-4.29444	0.957056	Dengue	QC	NaN	NaN	NaN	60.1428	0.0753124
Dengue / QC	_VVRDPQGIR_	P61626	-0.107145	0.107145	0.853125	0.270915	8	P61626	LYZ	Lysozyme C	LYSC_HUMAN	1	-7.15767	0.928423	Dengue	QC	NaN	NaN	NaN	2.53427	0.518017
Dengue / QC	_QKVEPLRAELQEGAR_	P02647	-0.049733	0.049733	0.161933	0.0721117	176	P02647	APOA1	Apolipoprotein A-I	APOA1_HUMAN	1	-3.38849	0.966115	Dengue	QC	NaN	NaN	NaN	57.3008	0.0747085
Dengue / QC	_NRNNALDFVTK_	P04114	-0.0737072	0.0737072	0.297992	0.119098	134	P04114	APOB	Apolipoprotein B-100	APOB_HUMAN	1	-4.98068	0.950193	Dengue	QC	NaN	NaN	NaN	42.2883	0.100455
Dengue / QC	_ALDLINKR_	P04196	-0.12962	0.12962	0.228763	0.0957742	172	P04196	HRG	Histidine-rich glycoprotein	HRG_HUMAN	1	-8.59279	0.914072	Dengue	QC	NaN	NaN	NaN	65.6127	0.0869678
Dengue / QC	_IHILPSMNPDGYEVAAAQGPNKPGYLVGR_	P15169	-0.166852	0.166852	0.194273	0.0836595	122	P15169	CPN1	Carboxypeptidase N catalytic chain	CBPN_HUMAN	1	-10.9216	0.890784	Dengue	QC	NaN	NaN	NaN	55.2226	0.0803617
Dengue / QC	_NRMDVFSQNMFC[Carbamidomethyl (C)]AGHPSLK_	B4DPQ0	-0.156203	0.156203	0.369559	0.141393	136	B4DPQ0	C1R	Complement C1r subcomponent	B4DPQ0_HUMAN	1	-10.2616	0.897384	Dengue	QC	NaN	NaN	NaN	35.0126	0.11612
Dengue / QC	_VQNEC[Carbamidomethyl (C)]PGITR_	P15169	-0.15607	0.15607	0.324591	0.12747	144	P15169	CPN1	Carboxypeptidase N catalytic chain	CBPN_HUMAN	1	-10.2533	0.897467	Dengue	QC	NaN	NaN	NaN	34.85	0.104922
Dengue / QC	_SHKPLNMGK_	P0C0L5	-0.0346566	0.0346566	0.678333	0.228399	48	P0C0L5	C4B	Complement C4-B	CO4B_HUMAN	1	-2.37359	0.976264	Dengue	QC	NaN	NaN	NaN	13.1493	0.246941
Dengue / QC	_KLEC[Carbamidomethyl (C)]NGENDC[Carbamidomethyl (C)]GDNSDERDC[Carbamidomethyl (C)]GR_	P13671	0.234624	0.234624	0.657528	0.223055	152	P13671	C6	Complement component C6	CO6_HUMAN	1	17.66	1.1766	Dengue	QC	NaN	NaN	NaN	21.7569	0.232841
Dengue / QC	_IPLDLVPK_	P01031	-0.135688	0.135688	0.228045	0.0955294	116	P01031	C5	Complement C5	CO5_HUMAN	1	-8.97643	0.910236	Dengue	QC	NaN	NaN	NaN	90.6473	0.086206
Dengue / QC	_YGLVTYATYPK_	B4E1Z4	-0.0813951	0.0813951	0.222847	0.0936921	176	B4E1Z4	NaN	cDNA FLJ55673, highly similar to Complement factor B (EC 3.4.21.47)	B4E1Z4_HUMAN	1	-5.48568	0.945143	Dengue	QC	NaN	NaN	NaN	54.6625	0.0847828
Dengue / QC	_GEWVALNPLRK_	P08603	0.0716458	0.0716458	0.377435	0.143673	170	P08603	CFH	Complement factor H	CFAH_HUMAN	1	5.09148	1.05091	Dengue	QC	NaN	NaN	NaN	25.5957	0.116346
Dengue / QC	_FLHVPDTFEGHFDGVPVISK_	P19823	-0.0240687	0.0240687	0.234828	0.0978028	176	P19823	ITIH2	Inter-alpha-trypsin inhibitor heavy chain H2	ITIH2_HUMAN	1	-1.65447	0.983455	Dengue	QC	NaN	NaN	NaN	66.9424	0.0871155
Dengue / QC	_C[Carbamidomethyl (C)]QSWSSMTPHR_	P00747	-0.0749681	0.0749681	0.346908	0.134286	176	P00747	PLG	Plasminogen	PLMN_HUMAN	1	-5.06369	0.949363	Dengue	QC	NaN	NaN	NaN	42.3417	0.109531
Dengue / QC	_LC[Carbamidomethyl (C)]TPLLPK_	P27918	-0.243313	0.243313	0.262738	0.107464	114	P27918	CFP	Properdin	PROP_HUMAN	1	-15.5197	0.844803	Dengue	QC	NaN	NaN	NaN	32.6652	0.0911127
Dengue / QC	_ALFVSEEEK_	B4E1Z4	-0.117345	0.117345	0.121888	0.0571552	176	B4E1Z4	NaN	cDNA FLJ55673, highly similar to Complement factor B (EC 3.4.21.47)	B4E1Z4_HUMAN	1	-7.81173	0.921883	Dengue	QC	NaN	NaN	NaN	54.6412	0.0660792
Dengue / QC	_TLLPVSKPEIR_	P01031	-0.079649	0.079649	0.20816	0.0885951	176	P01031	C5	Complement C5	CO5_HUMAN	1	-5.37122	0.946288	Dengue	QC	NaN	NaN	NaN	47.0774	0.0813513
Dengue / QC	_TDC[Carbamidomethyl (C)]LSLPSFENAIPMGEKK_	P08603	-0.067043	0.067043	0.307052	0.122051	176	P08603	CFH	Complement factor H	CFAH_HUMAN	1	-4.54075	0.954593	Dengue	QC	NaN	NaN	NaN	55.4764	0.100672
Dengue / QC	_VNDESTEGKTSYR_	P04114	0.188193	0.188193	0.515482	0.183939	144	P04114	APOB	Apolipoprotein B-100	APOB_HUMAN	1	13.9336	1.13934	Dengue	QC	NaN	NaN	NaN	35.6988	0.157946
Dengue / QC	_LNGESNLR_	P04114	-0.324319	0.324319	0.362679	0.13924	110	P04114	APOB	Apolipoprotein B-100	APOB_HUMAN	1	-20.1325	0.798675	Dengue	QC	NaN	NaN	NaN	46.1694	0.112839
Dengue / QC	_GEVLDNSFTGGIC[Carbamidomethyl (C)]K_	P13671	-0.0931237	0.0931237	0.161515	0.0719813	176	P13671	C6	Complement component C6	CO6_HUMAN	1	-6.25093	0.937491	Dengue	QC	NaN	NaN	NaN	54.563	0.0729867
Dengue / QC	_DSTYSLSSTLTLSKADYEK_	P01834	-0.0800944	0.0800944	0.755533	0.247634	62	P01834	IGKC	Immunoglobulin kappa constant	IGKC_HUMAN	1	-5.40042	0.945996	Dengue	QC	NaN	NaN	NaN	19.033	0.327631
Dengue / QC	_VHDVNDNWPVFTHR_	P33151	-0.14663	0.14663	0.361352	0.138824	84	P33151	CDH5	Cadherin-5	CADH5_HUMAN	1	-9.66421	0.903358	Dengue	QC	NaN	NaN	NaN	43.9909	0.111923
Dengue / QC	_TIAYENK_	Q08380	-0.0153818	0.0153818	0.460663	0.168134	122	Q08380	LGALS3BP	Galectin-3-binding protein	LG3BP_HUMAN	1	-1.06052	0.989395	Dengue	QC	NaN	NaN	NaN	35.7011	0.137716
Dengue / QC	_VYLSEC[Carbamidomethyl (C)]K_	P00747	-0.0310363	0.0310363	0.342366	0.132884	156	P00747	PLG	Plasminogen	PLMN_HUMAN	1	-2.1283	0.978717	Dengue	QC	NaN	NaN	NaN	40.6055	0.106424
Dengue / QC	_TM[Oxidation (M)]QALPYSTVGNSNNYLHLSVLR_	P01024	-0.064881	0.064881	0.503306	0.180445	176	P01024	C3	Complement C3	CO3_HUMAN	1	-4.39758	0.956024	Dengue	QC	NaN	NaN	NaN	58.1362	0.151599
Dengue / QC	_GNVATEISTER_	P04114	-0.0958726	0.0958726	0.0914701	0.0450904	176	P04114	APOB	Apolipoprotein B-100	APOB_HUMAN	1	-6.42939	0.935706	Dengue	QC	NaN	NaN	NaN	90.2358	0.0597881
Dengue / QC	_FNALQYLR_	P51884	-0.0658523	0.0658523	0.318971	0.125801	152	P51884	LUM	Lumican	LUM_HUMAN	1	-4.46193	0.955381	Dengue	QC	NaN	NaN	NaN	58.999	0.101078
Dengue / QC	_C[Carbamidomethyl (C)]NMGYEYSER_	P08603	-0.0684148	0.0684148	0.0723766	0.0369307	172	P08603	CFH	Complement factor H	CFAH_HUMAN	1	-4.63147	0.953685	Dengue	QC	NaN	NaN	NaN	86.5839	0.055522
Dengue / QC	_HSIFTPETNPR_	P00747	-0.0548442	0.0548442	0.144166	0.0656228	176	P00747	PLG	Plasminogen	PLMN_HUMAN	1	-3.73016	0.962698	Dengue	QC	NaN	NaN	NaN	52.4361	0.06806
Dengue / QC	_VSSFYAK_	P04114	-0.015947	0.015947	0.455343	0.166529	130	P04114	APOB	Apolipoprotein B-100	APOB_HUMAN	1	-1.09928	0.989007	Dengue	QC	NaN	NaN	NaN	39.1257	0.133648
Dengue / QC	_WSVLPRPDLHHDVNR_	O75882;O75882-2;O75882-3	-0.171792	0.171792	0.630552	0.215948	28	O75882;O75882-2;O75882-3	ATRN	Attractin;Isoform 2 of Attractin;Isoform 3 of Attractin	ATRN_HUMAN	1	-11.2261	0.887739	Dengue	QC	NaN	NaN	NaN	8.50145	0.201118
Dengue / QC	_YVGNMHGNEALGR_	P15169	-0.00161265	0.00161265	0.481494	0.17415	70	P15169	CPN1	Carboxypeptidase N catalytic chain	CBPN_HUMAN	1	-0.111718	0.998883	Dengue	QC	NaN	NaN	NaN	31.8149	0.140799
Dengue / QC	_LTGSSGFVTDGPGNYK_	O75882;O75882-2;O75882-3	-0.116391	0.116391	0.111149	0.0529705	164	O75882;O75882-2;O75882-3	ATRN	Attractin;Isoform 2 of Attractin;Isoform 3 of Attractin	ATRN_HUMAN	1	-7.75072	0.922493	Dengue	QC	NaN	NaN	NaN	73.0726	0.0619086
Dengue / QC	_VTISC[Carbamidomethyl (C)]SGSSSNIGSNTVNWYQQLPGTAPK_	P01699	0.0103382	0.0103382	0.485156	0.175255	174	P01699	IGLV1-44	Immunoglobulin lambda variable 1-44	LV144_HUMAN	1	0.719166	1.00719	Dengue	QC	NaN	NaN	NaN	72.2458	0.141931
Dengue / QC	_RLGMFNIQHC[Carbamidomethyl (C)]KK_	P01009	-0.146671	0.146671	0.53294	0.18867	158	P01009	SERPINA1	Alpha-1-antitrypsin	A1AT_HUMAN	1	-9.66675	0.903333	Dengue	QC	NaN	NaN	NaN	55.9206	0.158617
Dengue / QC	_VVLVAVDKGVFVLNKK_	P01024	-0.179159	0.179159	0.328724	0.128697	176	P01024	C3	Complement C3	CO3_HUMAN	1	-11.6782	0.883218	Dengue	QC	NaN	NaN	NaN	43.7119	0.100691
Dengue / QC	_SPAFTDLHLR_	P04114	-0.087225	0.087225	0.119982	0.0564542	176	P04114	APOB	Apolipoprotein B-100	APOB_HUMAN	1	-5.86684	0.941332	Dengue	QC	NaN	NaN	NaN	60.6696	0.0630322
Dengue / QC	_QEC[Carbamidomethyl (C)]SIPVC[Carbamidomethyl (C)]GQDQVTVAMTPR_	P00734	0.00201476	0.00201476	0.202973	0.0867714	172	P00734	F2	Prothrombin	THRB_HUMAN	1	0.13975	1.0014	Dengue	QC	NaN	NaN	NaN	70.1305	0.0772201
Dengue / QC	_AEIEYLEK_	P14151;P14151-2	-0.106594	0.106594	0.320617	0.126286	94	P14151;P14151-2	SELL	L-selectin;Isoform 2 of L-selectin	LYAM1_HUMAN	1	-7.1222	0.928778	Dengue	QC	NaN	NaN	NaN	30.6341	0.0977655
Dengue / QC	_NDLISATK_	P19823	-0.154988	0.154988	0.380926	0.14464	98	P19823	ITIH2	Inter-alpha-trypsin inhibitor heavy chain H2	ITIH2_HUMAN	1	-10.186	0.89814	Dengue	QC	NaN	NaN	NaN	70.0398	0.111369
Dengue / QC	_EYC[Carbamidomethyl (C)]GVPGDGDEELLR_	P02760	-0.132217	0.132217	0.230182	0.0962706	176	P02760	AMBP	Protein AMBP	AMBP_HUMAN	1	-8.75716	0.912428	Dengue	QC	NaN	NaN	NaN	70.9384	0.0811169
Dengue / QC	_EC[Carbamidomethyl (C)]LQTC[Carbamidomethyl (C)]R_	P02760	0.184467	0.184467	0.446169	0.164028	118	P02760	AMBP	Protein AMBP	AMBP_HUMAN	1	13.6397	1.1364	Dengue	QC	NaN	NaN	NaN	33.062	0.127049
Dengue / QC	_LSYEGEVTK_	P36955	-0.109567	0.109567	0.139238	0.0637773	170	P36955	SERPINF1	Pigment epithelium-derived factor	PEDF_HUMAN	1	-7.3134	0.926866	Dengue	QC	NaN	NaN	NaN	66.4958	0.0653191
Dengue / QC	_TPFDYC[Carbamidomethyl (C)]ALR_	G3XAK1;P26927	-0.110567	0.110567	0.265455	0.108384	100	G3XAK1;P26927	MST1	Hepatocyte growth factor-like protein	G3XAK1_HUMAN;HGFL_HUMAN	1	-7.3776	0.926224	Dengue	QC	NaN	NaN	NaN	27.2095	0.0857565
Dengue / QC	_VVPEGIR_	P01024	-0.0998849	0.0998849	0.143294	0.0653246	176	P01024	C3	Complement C3	CO3_HUMAN	1	-6.68926	0.933107	Dengue	QC	NaN	NaN	NaN	58.7293	0.0656858
Dengue / QC	_YHGDPMPC[Carbamidomethyl (C)]PKEDTPNSVWEPAK_	P09871	-0.0725221	0.0725221	0.317211	0.125261	164	P09871	C1S	Complement C1s subcomponent	C1S_HUMAN	1	-4.90259	0.950974	Dengue	QC	NaN	NaN	NaN	48.5391	0.0962709
Dengue / QC	_KWIYHLTEGSTDLR_	O95445	-0.0489713	0.0489713	0.319279	0.125905	130	O95445	APOM	Apolipoprotein M	APOM_HUMAN	1	-3.33746	0.966625	Dengue	QC	NaN	NaN	NaN	66.8446	0.0965984
Dengue / QC	_AC[Carbamidomethyl (C)]EPGVDYVYK_	P01024	-0.0994323	0.0994323	0.174789	0.0768289	176	P01024	C3	Complement C3	CO3_HUMAN	1	-6.65998	0.9334	Dengue	QC	NaN	NaN	NaN	47.4493	0.0703526
Dengue / QC	_DFDFVPPVVR_	P01024	-0.208249	0.208249	0.384902	0.145861	152	P01024	C3	Complement C3	CO3_HUMAN	1	-13.4413	0.865587	Dengue	QC	NaN	NaN	NaN	71.5228	0.110758
Dengue / QC	_ALEQDLPVNIK_	Q96KN2	-0.0604453	0.0604453	0.22734	0.095317	96	Q96KN2	CNDP1	Beta-Ala-His dipeptidase	CNDP1_HUMAN	1	-4.10319	0.958968	Dengue	QC	NaN	NaN	NaN	89.363	0.0794463
Dengue / QC	_QM[Oxidation (M)]SKYPSGER_	P08603	0.480987	0.480987	0.821519	0.263342	102	P08603	CFH	Complement factor H	CFAH_HUMAN	1	39.5698	1.3957	Dengue	QC	NaN	NaN	NaN	19.0976	0.420203
Dengue / QC	_VKDISEVVTPR_	B4E1Z4	-0.0991766	0.0991766	0.0916631	0.0451778	176	B4E1Z4	NaN	cDNA FLJ55673, highly similar to Complement factor B (EC 3.4.21.47)	B4E1Z4_HUMAN	1	-6.64343	0.933566	Dengue	QC	NaN	NaN	NaN	61.1257	0.0556383
Dengue / QC	_EAC[Carbamidomethyl (C)]NAWLQK_	Q9NZP8	0.0475208	0.0475208	0.462474	0.168653	38	Q9NZP8	C1RL	Complement C1r subcomponent-like protein	C1RL_HUMAN	1	3.34874	1.03349	Dengue	QC	NaN	NaN	NaN	9.35713	0.124438
Dengue / QC	_SQVEPETR_	P15169	-0.120826	0.120826	0.512763	0.183152	112	P15169	CPN1	Carboxypeptidase N catalytic chain	CBPN_HUMAN	1	-8.0339	0.919661	Dengue	QC	NaN	NaN	NaN	42.4856	0.144147
Dengue / QC	_YNSQNQSNNQFVLYR_	P01042	-0.0757436	0.0757436	0.0836435	0.0417747	176	P01042	KNG1	Kininogen-1	KNG1_HUMAN	1	-5.11471	0.948853	Dengue	QC	NaN	NaN	NaN	56.5056	0.0540211
Dengue / QC	_GFYPSDIAVEWESNGQPENNYK_	P01857	-0.101834	0.101834	0.289009	0.116167	176	P01857	IGHG1	Immunoglobulin heavy constant gamma 1	IGHG1_HUMAN	1	-6.81526	0.931847	Dengue	QC	NaN	NaN	NaN	63.5876	0.0889679
Dengue / QC	_TFGSGEADC[Carbamidomethyl (C)]GLRPLFEK_	P00734	-0.0878201	0.0878201	0.243953	0.100976	168	P00734	F2	Prothrombin	THRB_HUMAN	1	-5.90566	0.940943	Dengue	QC	NaN	NaN	NaN	58.3205	0.0806706
Dengue / QC	_SLGEC[Carbamidomethyl (C)]C[Carbamidomethyl (C)]DVEDSTTC[Carbamidomethyl (C)]FNAK_	P02774;P02774-3	-0.0333267	0.0333267	0.165713	0.0735002	176	P02774;P02774-3	GC	Vitamin D-binding protein;Isoform 3 of Vitamin D-binding protein	VTDB_HUMAN	1	-2.28355	0.977164	Dengue	QC	NaN	NaN	NaN	55.7467	0.0671133
Dengue / QC	_SQASSC[Carbamidomethyl (C)]SLQSSDSVPVGLC[Carbamidomethyl (C)]K_	Q9UGM5	0.00871586	0.00871586	0.456173	0.166801	172	Q9UGM5	FETUB	Fetuin-B	FETUB_HUMAN	1	0.605966	1.00606	Dengue	QC	NaN	NaN	NaN	60.4753	0.125438
Dengue / QC	_GKEYFAIDNSGR_	P33151	-1.00754	1.00754	0.879579	0.27718	30	P33151	CDH5	Cadherin-5	CADH5_HUMAN	1	-50.2607	0.497393	Dengue	QC	NaN	NaN	NaN	4.17257	0.584117
Dengue / QC	_YNWRENLDRDIALMK_	P00734	-0.174494	0.174494	0.51844	0.184768	160	P00734	F2	Prothrombin	THRB_HUMAN	1	-11.3922	0.886078	Dengue	QC	NaN	NaN	NaN	49.3421	0.144596
Dengue / QC	_SIVSALKR_	P01031	-0.156078	0.156078	0.474116	0.172064	140	P01031	C5	Complement C5	CO5_HUMAN	1	-10.2539	0.897461	Dengue	QC	NaN	NaN	NaN	48.2507	0.130204
Dengue / QC	_GNPPIYR_	P01031	-0.106503	0.106503	0.316912	0.125177	136	P01031	C5	Complement C5	CO5_HUMAN	1	-7.11634	0.928837	Dengue	QC	NaN	NaN	NaN	49.8056	0.092684
Dengue / QC	_LTFGGGTK_	A0A0A0MT69	-0.0394719	0.0394719	0.567513	0.198554	154	A0A0A0MT69	IGKJ4	Immunoglobulin kappa joining 4 (Fragment)	A0A0A0MT69_HUMAN	1	-2.6989	0.973011	Dengue	QC	NaN	NaN	NaN	48.3354	0.162443
Dengue / QC	_MNTVIAALSR_	P08185	-0.0801769	0.0801769	0.191827	0.0827917	164	P08185	SERPINA6	Corticosteroid-binding globulin	CBG_HUMAN	1	-5.40583	0.945942	Dengue	QC	NaN	NaN	NaN	104.004	0.0711649
Dengue / QC	_SVQLTEK_	P01024	-0.016093	0.016093	0.341197	0.132573	176	P01024	C3	Complement C3	CO3_HUMAN	1	-1.10929	0.988907	Dengue	QC	NaN	NaN	NaN	69.4776	0.097264
Dengue / QC	_ALLAFQESK_	P20851;P20851-2	-0.0722534	0.0722534	0.2458	0.101639	126	P20851;P20851-2	C4BPB	C4b-binding protein beta chain;Isoform 2 of C4b-binding protein beta chain	C4BPB_HUMAN	1	-4.88488	0.951151	Dengue	QC	NaN	NaN	NaN	82.7837	0.0794355
Dengue / QC	_THLAPYSDELR_	P02647	-0.147684	0.147684	0.299957	0.119725	168	P02647	APOA1	Apolipoprotein A-I	APOA1_HUMAN	1	-9.73018	0.902698	Dengue	QC	NaN	NaN	NaN	112.535	0.0890258
Dengue / QC	_SEAAC[Carbamidomethyl (C)]LAAGPGIR_	O75882;O75882-2;O75882-3	-0.118724	0.118724	0.123685	0.0578519	172	O75882;O75882-2;O75882-3	ATRN	Attractin;Isoform 2 of Attractin;Isoform 3 of Attractin	ATRN_HUMAN	1	-7.89978	0.921002	Dengue	QC	NaN	NaN	NaN	95.3321	0.0596591
Dengue / QC	_LQETSNWLLSQQQADGSFQDLSPVIHR_	P0C0L5	-0.110141	0.110141	0.291575	0.116979	172	P0C0L5	C4B	Complement C4-B	CO4B_HUMAN	1	-7.35026	0.926497	Dengue	QC	NaN	NaN	NaN	125.766	0.0874394
Dengue / QC	_YLYEIAR_	P02768	-0.0766789	0.0766789	0.311932	0.123563	176	P02768	ALB	Serum albumin	ALBU_HUMAN	1	-5.1762	0.948238	Dengue	QC	NaN	NaN	NaN	58.4559	0.0907908
Dengue / QC	_VNPTVFFDIAVDGEPLGR_	P62937	0.0473503	0.0473503	0.687356	0.230718	64	P62937	PPIA	Peptidyl-prolyl cis-trans isomerase A	PPIA_HUMAN	1	3.33653	1.03337	Dengue	QC	NaN	NaN	NaN	24.7042	0.226298
Dengue / QC	_SGIEC[Carbamidomethyl (C)]QLWR_	P00734	-0.0808914	0.0808914	0.479654	0.173648	176	P00734	F2	Prothrombin	THRB_HUMAN	1	-5.45267	0.945473	Dengue	QC	NaN	NaN	NaN	47.921	0.128728
Dengue / QC	_NEC[Carbamidomethyl (C)]FLQHKDDNPNLPR_	P02768	0.0601648	0.0601648	0.40469	0.151864	176	P02768	ALB	Serum albumin	ALBU_HUMAN	1	4.25848	1.04258	Dengue	QC	NaN	NaN	NaN	54.1797	0.108975
Dengue / QC	_SGQAPVLVIYEDSKRPSGIPER_	A0A075B6K4	0.0026871	0.0026871	0.324423	0.127429	174	A0A075B6K4	IGLV3-10	Immunoglobulin lambda variable 3-10	LV310_HUMAN	1	0.186429	1.00186	Dengue	QC	NaN	NaN	NaN	123.943	0.0920066
Dengue / QC	_YLDKTEQWSTLPPETK_	P0C0L5	-0.12365	0.12365	0.454715	0.166363	158	P0C0L5	C4B	Complement C4-B	CO4B_HUMAN	1	-8.21373	0.917863	Dengue	QC	NaN	NaN	NaN	79.6608	0.120799
Dengue / QC	_LIQDAVTGLTVNGQITGDKR_	Q06033;Q06033-2	0.00333461	0.00333461	0.45065	0.165274	90	Q06033;Q06033-2	ITIH3	Inter-alpha-trypsin inhibitor heavy chain H3;Isoform 2 of Inter-alpha-trypsin inhibitor heavy chain H3	ITIH3_HUMAN	1	0.231405	1.00231	Dengue	QC	NaN	NaN	NaN	37.5269	0.119037
Dengue / QC	_DINYVNPVIK_	P01031	-0.135824	0.135824	0.154683	0.0694405	148	P01031	C5	Complement C5	CO5_HUMAN	1	-8.98504	0.91015	Dengue	QC	NaN	NaN	NaN	133.034	0.0633695
Dengue / QC	_AEQC[Carbamidomethyl (C)]C[Carbamidomethyl (C)]EETASSISLHGK_	P02748	-0.107566	0.107566	0.49083	0.176796	158	P02748	C9	Complement component C9	CO9_HUMAN	1	-7.18472	0.928153	Dengue	QC	NaN	NaN	NaN	54.5434	0.129729
Dengue / QC	_QEPSQGTTTYAVTSILR_	A0A286YEY5;P01877	0.0167613	0.0167613	0.533646	0.188846	112	A0A286YEY5;P01877	IGHA2	Immunoglobulin heavy constant alpha 2 (Fragment);Immunoglobulin heavy constant alpha 2	A0A286YEY5_HUMAN;IGHA2_HUMAN	1	1.16858	1.01169	Dengue	QC	NaN	NaN	NaN	85.931	0.143889
Dengue / QC	_ESC[Carbamidomethyl (C)]GYDTC[Carbamidomethyl (C)]YDWEK_	P13671	-0.0384785	0.0384785	0.255103	0.104854	176	P13671	C6	Complement component C6	CO6_HUMAN	1	-2.63187	0.973681	Dengue	QC	NaN	NaN	NaN	47.9075	0.0778863
Dengue / QC	_LFLEPTR_	P00747	-0.104853	0.104853	0.130845	0.060548	160	P00747	PLG	Plasminogen	PLMN_HUMAN	1	-7.01003	0.9299	Dengue	QC	NaN	NaN	NaN	59.7709	0.0583068
Dengue / QC	_DSQEEEKTEALTSAK_	P06396	0.184741	0.184741	0.480155	0.173786	150	P06396	GSN	Gelsolin	GELS_HUMAN	1	13.6613	1.13661	Dengue	QC	NaN	NaN	NaN	29.8245	0.124508
Dengue / QC	_YTAC[Carbamidomethyl (C)]ETAR_	P00734	-0.0378541	0.0378541	0.487524	0.175846	172	P00734	F2	Prothrombin	THRB_HUMAN	1	-2.58972	0.974103	Dengue	QC	NaN	NaN	NaN	60.0799	0.127314
Dengue / QC	_TVMVNIENPEGIPVK_	P01024	-0.239347	0.239347	0.413252	0.154374	170	P01024	C3	Complement C3	CO3_HUMAN	1	-15.2871	0.847129	Dengue	QC	NaN	NaN	NaN	53.5339	0.107833
Dengue / QC	_IKFDKYK_	P04114	-0.0944122	0.0944122	0.815983	0.262063	28	P04114	APOB	Apolipoprotein B-100	APOB_HUMAN	1	-6.33462	0.936654	Dengue	QC	NaN	NaN	NaN	8.46157	0.369664
Dengue / QC	_LYHSEAFTVNFGDTEEAK_	P01009	-0.0958091	0.0958091	0.335176	0.130673	146	P01009	SERPINA1	Alpha-1-antitrypsin	A1AT_HUMAN	1	-6.42527	0.935747	Dengue	QC	NaN	NaN	NaN	93.9382	0.0915974
Dengue / QC	_ENFLFLTPDC[Carbamidomethyl (C)]K_	P01042	-0.0818045	0.0818045	0.316834	0.125163	170	P01042	KNG1	Kininogen-1	KNG1_HUMAN	1	-5.51249	0.944875	Dengue	QC	NaN	NaN	NaN	73.5192	0.0879701
Dengue / QC	_RLGM[Oxidation (M)]FNIQHC[Carbamidomethyl (C)]K_	P01009	-0.0614738	0.0614738	0.605895	0.209092	174	P01009	SERPINA1	Alpha-1-antitrypsin	A1AT_HUMAN	1	-4.17153	0.958285	Dengue	QC	NaN	NaN	NaN	73.8064	0.170803
Dengue / QC	_YFKPGM[Oxidation (M)]PFDLMVFVTNPDGSPAYR_	P01024	-0.0331174	0.0331174	0.708282	0.235887	86	P01024	C3	Complement C3	CO3_HUMAN	1	-2.26938	0.977306	Dengue	QC	NaN	NaN	NaN	22.2937	0.233173
Dengue / QC	_AELQEGAR_	P02647	0.0173172	0.0173172	0.507986	0.1818	158	P02647	APOA1	Apolipoprotein A-I	APOA1_HUMAN	1	1.20757	1.01208	Dengue	QC	NaN	NaN	NaN	60.6237	0.132685
Dengue / QC	_LPDATPTELAK_	D6RF35	-0.0767616	0.0767616	0.379248	0.144145	118	D6RF35	GC	Vitamin D-binding protein	D6RF35_HUMAN	1	-5.18163	0.948184	Dengue	QC	NaN	NaN	NaN	111.63	0.0996197
Dengue / QC	_VLGPFC[Carbamidomethyl (C)]GEK_	P48740	-0.158607	0.158607	0.292249	0.117231	76	P48740	MASP1	Mannan-binding lectin serine protease 1	MASP1_HUMAN	1	-10.411	0.89589	Dengue	QC	NaN	NaN	NaN	42.7483	0.0821396
Dengue / QC	_SLTEEAENWGDGEPNNKK_	P14151;P14151-2	-0.153624	0.153624	0.501937	0.180122	98	P14151;P14151-2	SELL	L-selectin;Isoform 2 of L-selectin	LYAM1_HUMAN	1	-10.101	0.89899	Dengue	QC	NaN	NaN	NaN	47.9953	0.128954
Dengue / QC	_IVAC[Carbamidomethyl (C)]ASYKPSR_	P01031	0.100974	0.100974	0.609979	0.210153	114	P01031	C5	Complement C5	CO5_HUMAN	1	7.24974	1.0725	Dengue	QC	NaN	NaN	NaN	27.8353	0.169014
Dengue / QC	_QFSFPLSSEPFQGSYK_	P01023	-0.153587	0.153587	0.445894	0.163969	174	P01023	A2M	Alpha-2-macroglobulin	A2MG_HUMAN	1	-10.0987	0.899013	Dengue	QC	NaN	NaN	NaN	117.359	0.113596
Dengue / QC	_LRTEGDGVYTLNNEKQWINK_	P00738	-0.111503	0.111503	0.49347	0.177602	168	P00738	HP	Haptoglobin	HPT_HUMAN	1	-7.43766	0.925623	Dengue	QC	NaN	NaN	NaN	86.3042	0.12596
Dengue / QC	_KPDVSHGEMVSGFGPIYNYK_	P04003	-0.112852	0.112852	0.227949	0.0954961	152	P04003	C4BPA	C4b-binding protein alpha chain	C4BPA_HUMAN	1	-7.52419	0.924758	Dengue	QC	NaN	NaN	NaN	77.5396	0.0707547
Dengue / QC	_ILLQGTPVAQMTEDAVDAERLK_	P01024	-0.0426659	0.0426659	0.598508	0.207073	176	P01024	C3	Complement C3	CO3_HUMAN	1	-2.91408	0.970859	Dengue	QC	NaN	NaN	NaN	69.4193	0.162391
Dengue / QC	_KQTALVELVK_	P02768	-0.179163	0.179163	0.259306	0.106271	176	P02768	ALB	Serum albumin	ALBU_HUMAN	1	-11.6785	0.883215	Dengue	QC	NaN	NaN	NaN	49.8871	0.075033
Dengue / QC	_WQQGNVFSC[Carbamidomethyl (C)]SVMHEALHNHYTQK_	P01857	0.104775	0.104775	0.729543	0.24112	158	P01857	IGHG1	Immunoglobulin heavy constant gamma 1	IGHG1_HUMAN	1	7.53269	1.07533	Dengue	QC	NaN	NaN	NaN	31.0303	0.243971
Dengue / QC	_DDLYVSDAFHK_	P01008	0.122613	0.122613	0.405272	0.152023	162	P01008	SERPINC1	Antithrombin-III	ANT3_HUMAN	1	8.87051	1.08871	Dengue	QC	NaN	NaN	NaN	50.4962	0.10124
Dengue / QC	_QIGSVYRLPPLR_	P04196	-0.0238223	0.0238223	0.272843	0.111007	142	P04196	HRG	Histidine-rich glycoprotein	HRG_HUMAN	1	-1.63768	0.983623	Dengue	QC	NaN	NaN	NaN	55.6594	0.0766738
Dengue / QC	_NSVIKVPMMNSK_	P05155;P05155-3	-0.0573793	0.0573793	0.151642	0.0683841	176	P05155;P05155-3	SERPING1	Plasma protease C1 inhibitor;Isoform 3 of Plasma protease C1 inhibitor	IC1_HUMAN	1	-3.89918	0.961008	Dengue	QC	NaN	NaN	NaN	65.4685	0.0585028
Dengue / QC	_GC[Carbamidomethyl (C)]GEQTMIYLAPTLAASR_	P0C0L5	-0.0161686	0.0161686	0.318192	0.125545	176	P0C0L5	C4B	Complement C4-B	CO4B_HUMAN	1	-1.11446	0.988855	Dengue	QC	NaN	NaN	NaN	78.5588	0.0841837
Dengue / QC	_IIAPPER_	P60709	0.00122505	0.00122505	0.576629	0.201036	162	P60709	ACTB	Actin, cytoplasmic 1	ACTB_HUMAN	1	0.0849501	1.00085	Dengue	QC	NaN	NaN	NaN	64.8535	0.150246
Dengue / QC	_YMDGMTVGVVR_	P23142	-0.202186	0.202186	0.530718	0.188087	102	P23142	FBLN1	Fibulin-1	FBLN1_HUMAN	1	-13.0767	0.869233	Dengue	QC	NaN	NaN	NaN	42.2022	0.133341
Dengue / QC	_DTLM[Oxidation (M)]ISR_	P01857	-0.0982306	0.0982306	0.662616	0.224293	176	P01857	IGHG1	Immunoglobulin heavy constant gamma 1	IGHG1_HUMAN	1	-6.5822	0.934178	Dengue	QC	NaN	NaN	NaN	91.7982	0.192452
Dengue / QC	_QFGPYC[Carbamidomethyl (C)]GHGFPGPLNIETK_	P09871	-0.15106	0.15106	0.474728	0.172243	134	P09871	C1S	Complement C1s subcomponent	C1S_HUMAN	1	-9.94116	0.900588	Dengue	QC	NaN	NaN	NaN	41.9766	0.116056
Dengue / QC	_LAAC[Carbamidomethyl (C)]LEGNC[Carbamidomethyl (C)]AEGLGTNYR_	P00734	-0.0306402	0.0306402	0.0866443	0.043061	174	P00734	F2	Prothrombin	THRB_HUMAN	1	-2.10143	0.978986	Dengue	QC	NaN	NaN	NaN	83.4981	0.0482408
Dengue / QC	_C[Carbamidomethyl (C)]YGPGVGR_	O43866	-0.097162	0.097162	0.522317	0.185806	162	O43866	CD5L	CD5 antigen-like	CD5L_HUMAN	1	-6.51298	0.93487	Dengue	QC	NaN	NaN	NaN	101.591	0.130093
Dengue / QC	_SLGFC[Carbamidomethyl (C)]DTTNK_	P02745	-0.0818442	0.0818442	0.498633	0.179092	170	P02745	C1QA	Complement C1q subcomponent subunit A	C1QA_HUMAN	1	-5.51509	0.944849	Dengue	QC	NaN	NaN	NaN	54.3453	0.122078
Dengue / QC	_VEDIPLAR_	P04114	-0.107129	0.107129	0.191378	0.0826475	154	P04114	APOB	Apolipoprotein B-100	APOB_HUMAN	1	-7.15664	0.928434	Dengue	QC	NaN	NaN	NaN	53.5826	0.0628066
Dengue / QC	_TSGMQFC[Carbamidomethyl (C)]VK_	P01031	-0.0609916	0.0609916	0.394268	0.148756	164	P01031	C5	Complement C5	CO5_HUMAN	1	-4.1395	0.958605	Dengue	QC	NaN	NaN	NaN	51.5789	0.0959265
Dengue / QC	_LLEVPEGR_	P09871	-0.0871798	0.0871798	0.249992	0.102992	176	P09871	C1S	Complement C1s subcomponent	C1S_HUMAN	1	-5.86389	0.941361	Dengue	QC	NaN	NaN	NaN	61.4571	0.0709118
Dengue / QC	_YAASSYLSLTPEQWK_	P0DOY2	-0.0120127	0.0120127	0.683446	0.229688	176	P0DOY2	IGLC2	Immunoglobulin lambda constant 2	IGLC2_HUMAN	1	-0.829198	0.991708	Dengue	QC	NaN	NaN	NaN	59.5166	0.199871
Dengue / QC	_C[Carbamidomethyl (C)]FEPQLLR_	P00748	-0.0660495	0.0660495	0.330218	0.129142	166	P00748	F12	Coagulation factor XII	FA12_HUMAN	1	-4.47499	0.95525	Dengue	QC	NaN	NaN	NaN	85.9191	0.0834654
Dengue / QC	_NTM[Oxidation (M)]ILEIC[Carbamidomethyl (C)]TR_	P01024	-0.0503061	0.0503061	0.388954	0.147059	164	P01024	C3	Complement C3	CO3_HUMAN	1	-3.42686	0.965731	Dengue	QC	NaN	NaN	NaN	72.2132	0.0941032
Dengue / QC	_WSGQTAIC[Carbamidomethyl (C)]DNGAGYC[Carbamidomethyl (C)]SNPGIPIGTR_	B4E1Z4	-0.0285008	0.0285008	0.287763	0.115876	176	B4E1Z4	NaN	cDNA FLJ55673, highly similar to Complement factor B (EC 3.4.21.47)	B4E1Z4_HUMAN	1	-1.95614	0.980439	Dengue	QC	NaN	NaN	NaN	52.6825	0.0759335
Dengue / QC	_ATEDEGSEQKIPEATNR_	P01008	-0.0898919	0.0898919	0.240689	0.0998401	176	P01008	SERPINC1	Antithrombin-III	ANT3_HUMAN	1	-6.04069	0.939593	Dengue	QC	NaN	NaN	NaN	62.6074	0.068817
Dengue / QC	_ALLAYAFALAGNQDKR_	P01023	-0.152446	0.152446	0.333614	0.130179	140	P01023	A2M	Alpha-2-macroglobulin	A2MG_HUMAN	1	-10.0276	0.899724	Dengue	QC	NaN	NaN	NaN	118.295	0.0834452
Dengue / QC	_LSPLGEEMRDR_	P02647	-0.037376	0.037376	0.181424	0.0791599	176	P02647	APOA1	Apolipoprotein A-I	APOA1_HUMAN	1	-2.55744	0.974426	Dengue	QC	NaN	NaN	NaN	76.5286	0.0599441
Dengue / QC	_GQVVPALNEK_	P22792	-0.0443998	0.0443998	0.3311	0.129405	162	P22792	CPN2	Carboxypeptidase N subunit 2	CPN2_HUMAN	1	-3.03068	0.969693	Dengue	QC	NaN	NaN	NaN	50.8756	0.0823409
Dengue / QC	_VMDKYTFELSR_	P02774;P02774-3	-0.0589594	0.0589594	0.130575	0.0604376	176	P02774;P02774-3	GC	Vitamin D-binding protein;Isoform 3 of Vitamin D-binding protein	VTDB_HUMAN	1	-4.00437	0.959956	Dengue	QC	NaN	NaN	NaN	56.0729	0.0524728
Dengue / QC	_SAGWNIPIGLLYC[Carbamidomethyl (C)]DLPEPR_	P02787	-0.038242	0.038242	0.474321	0.172128	176	P02787	TF	Serotransferrin	TRFE_HUMAN	1	-2.61591	0.973841	Dengue	QC	NaN	NaN	NaN	59.8756	0.11127
Dengue / QC	_TGTHGLLVK_	P01023	-0.0638008	0.0638008	0.567346	0.19852	174	P01023	A2M	Alpha-2-macroglobulin	A2MG_HUMAN	1	-4.32598	0.95674	Dengue	QC	NaN	NaN	NaN	72.6621	0.139224
Dengue / QC	_DGLKYHYLIR_	P43652	-0.0707959	0.0707959	0.365234	0.140045	112	P43652	AFM	Afamin	AFAM_HUMAN	1	-4.78874	0.952113	Dengue	QC	NaN	NaN	NaN	59.6458	0.0875326
Dengue / QC	_ELGC[Carbamidomethyl (C)]GAASGTPSGILYEPPAEK_	O43866	-0.0596903	0.0596903	0.219531	0.0925474	156	O43866	CD5L	CD5 antigen-like	CD5L_HUMAN	1	-4.05299	0.95947	Dengue	QC	NaN	NaN	NaN	125.086	0.0645925
Dengue / QC	_SHALQLNNR_	P0C0L5	0.0323466	0.0323466	0.470522	0.170932	174	P0C0L5	C4B	Complement C4-B	CO4B_HUMAN	1	2.26742	1.02267	Dengue	QC	NaN	NaN	NaN	57.042	0.109657
Dengue / QC	_KFIC[Carbamidomethyl (C)]PLTGLWPINTLK_	P02749	0.0739988	0.0739988	0.381211	0.144738	176	P02749	APOH	Beta-2-glycoprotein 1	APOH_HUMAN	1	5.26303	1.05263	Dengue	QC	NaN	NaN	NaN	78.1584	0.0904362
Dengue / QC	_KQELSEAEQATR_	P01024	0.215965	0.215965	0.543198	0.191627	176	P01024	C3	Complement C3	CO3_HUMAN	1	16.148	1.16148	Dengue	QC	NaN	NaN	NaN	35.0953	0.129642
Dengue / QC	_NTLYLQMNNLR_	A0A0C4DH36	-0.0991697	0.0991697	0.333482	0.130145	150	A0A0C4DH36	IGHV3-38	Immunoglobulin heavy variable 3-38 (non-functional) (Fragment)	A0A0C4DH36_HUMAN	1	-6.64299	0.93357	Dengue	QC	NaN	NaN	NaN	124.473	0.0819816
Dengue / QC	_VGYVSGWGQSDNFK_	P00739	-0.0825778	0.0825778	0.421977	0.15698	176	P00739	HPR	Haptoglobin-related protein	HPTR_HUMAN	1	-5.56313	0.944369	Dengue	QC	NaN	NaN	NaN	123.513	0.098738
Dengue / QC	_TEC[Carbamidomethyl (C)]IKPVVQEVLTITPFQR_	P13671	0.0962355	0.0962355	0.548577	0.193229	144	P13671	C6	Complement component C6	CO6_HUMAN	1	6.89805	1.06898	Dengue	QC	NaN	NaN	NaN	41.6111	0.131359
Dengue / QC	_ALVDTLK_	P04114	-0.0785965	0.0785965	0.205164	0.0875523	176	P04114	APOB	Apolipoprotein B-100	APOB_HUMAN	1	-5.30215	0.946978	Dengue	QC	NaN	NaN	NaN	76.3695	0.0620827
Dengue / QC	_SFVHLEPMSHELPC[Carbamidomethyl (C)]GHTQTVQAHYILNGGTLLGLKK_	P01023	-0.214541	0.214541	0.687694	0.230805	86	P01023	A2M	Alpha-2-macroglobulin	A2MG_HUMAN	1	-13.8179	0.861821	Dengue	QC	NaN	NaN	NaN	41.706	0.195701
Dengue / QC	_SVSLPSLDPASAK_	P04114	-0.0655223	0.0655223	0.211628	0.0898127	172	P04114	APOB	Apolipoprotein B-100	APOB_HUMAN	1	-4.44007	0.955599	Dengue	QC	NaN	NaN	NaN	63.0921	0.0625768
Dengue / QC	_AAISGENAGLVR_	P19827	-0.0724862	0.0724862	0.218007	0.0919853	174	P19827	ITIH1	Inter-alpha-trypsin inhibitor heavy chain H1	ITIH1_HUMAN	1	-4.90023	0.950998	Dengue	QC	NaN	NaN	NaN	66.8799	0.0634451
Dengue / QC	_ITDNMFC[Carbamidomethyl (C)]AGYKPDEGKR_	P00734	-0.0467242	0.0467242	0.337072	0.131244	166	P00734	F2	Prothrombin	THRB_HUMAN	1	-3.18679	0.968132	Dengue	QC	NaN	NaN	NaN	49.5625	0.0811696
Dengue / QC	_WESGYNTR_	P61626	-0.140054	0.140054	0.479192	0.173524	108	P61626	LYZ	Lysozyme C	LYSC_HUMAN	1	-9.2515	0.907485	Dengue	QC	NaN	NaN	NaN	101.767	0.109817
Dengue / QC	_AGDFLEANYMNLQR_	P01024	-0.0770327	0.0770327	0.262021	0.107218	176	P01024	C3	Complement C3	CO3_HUMAN	1	-5.19945	0.948005	Dengue	QC	NaN	NaN	NaN	76.816	0.0690098
Dengue / QC	_YKEENDDFASFRVDR_	P04196	0.0351918	0.0351918	0.372327	0.142175	174	P04196	HRG	Histidine-rich glycoprotein	HRG_HUMAN	1	2.46931	1.02469	Dengue	QC	NaN	NaN	NaN	107.68	0.0869867
Dengue / QC	_NLPNGDFR_	B4DPQ0	-0.014654	0.014654	0.323501	0.127187	174	B4DPQ0	C1R	Complement C1r subcomponent	B4DPQ0_HUMAN	1	-1.0106	0.989894	Dengue	QC	NaN	NaN	NaN	53.8843	0.0779666
Dengue / QC	_TAGWNIPMGLLYNK_	P02787	-0.130365	0.130365	0.394399	0.148796	176	P02787	TF	Serotransferrin	TRFE_HUMAN	1	-8.63999	0.9136	Dengue	QC	NaN	NaN	NaN	94.6886	0.09053
Dengue / QC	_IGQDGISTSATTNLK_	P04114	-0.100288	0.100288	0.281747	0.113995	176	P04114	APOB	Apolipoprotein B-100	APOB_HUMAN	1	-6.71532	0.932847	Dengue	QC	NaN	NaN	NaN	120.926	0.071594
Dengue / QC	_SEDTAMYYC[Carbamidomethyl (C)]AR_	A0A0A0MS14	-0.0728178	0.0728178	0.505467	0.181051	176	A0A0A0MS14	IGHV1-45	Immunoglobulin heavy variable 1-45	HV145_HUMAN	1	-4.92209	0.950779	Dengue	QC	NaN	NaN	NaN	58.6174	0.11517
Dengue / QC	_QINDYVEKGTQGK_	P01009	-0.478607	0.478607	0.720758	0.239092	164	P01009	SERPINA1	Alpha-1-antitrypsin	A1AT_HUMAN	1	-28.233	0.71767	Dengue	QC	NaN	NaN	NaN	94.8788	0.214756
Dengue / QC	_FWTSFFPK_	F8WF14;P06276	-0.159301	0.159301	0.510911	0.182638	40	F8WF14;P06276	BCHE	Carboxylic ester hydrolase;Cholinesterase	F8WF14_HUMAN;CHLE_HUMAN	1	-10.4541	0.895459	Dengue	QC	NaN	NaN	NaN	21.4982	0.115035
Dengue / QC	_KLC[Carbamidomethyl (C)]M[Oxidation (M)]AALK_	P02774;P02774-3	-0.0857843	0.0857843	0.693314	0.232205	146	P02774;P02774-3	GC	Vitamin D-binding protein;Isoform 3 of Vitamin D-binding protein	VTDB_HUMAN	1	-5.77279	0.942272	Dengue	QC	NaN	NaN	NaN	41.7971	0.193635
Dengue / QC	_TEVSSNHVLIYLDK_	P01023	-0.105966	0.105966	0.494258	0.177831	138	P01023	A2M	Alpha-2-macroglobulin	A2MG_HUMAN	1	-7.08173	0.929183	Dengue	QC	NaN	NaN	NaN	109.672	0.111834
Dengue / QC	_GMTRPLSTLISSSQSC[Carbamidomethyl (C)]QYTLDAK_	P04114	-0.0376023	0.0376023	0.368266	0.140983	156	P04114	APOB	Apolipoprotein B-100	APOB_HUMAN	1	-2.57272	0.974273	Dengue	QC	NaN	NaN	NaN	75.1969	0.0845406
Dengue / QC	_YHFVTPLTSM[Oxidation (M)]VVTKPEDNEDER_	Q06033;Q06033-2	0.19673	0.19673	0.709581	0.236145	32	Q06033;Q06033-2	ITIH3	Inter-alpha-trypsin inhibitor heavy chain H3;Isoform 2 of Inter-alpha-trypsin inhibitor heavy chain H3	ITIH3_HUMAN	1	14.6098	1.1461	Dengue	QC	NaN	NaN	NaN	10.625	0.19891
Dengue / QC	_FTFEYSR_	P43652	-0.0806916	0.0806916	0.204899	0.0874652	176	P43652	AFM	Afamin	AFAM_HUMAN	1	-5.43957	0.945604	Dengue	QC	NaN	NaN	NaN	81.0549	0.0593489
Dengue / QC	_AKDQLTC[Carbamidomethyl (C)]NKFDLK_	P01024	0.0468376	0.0468376	0.391252	0.147802	176	P01024	C3	Complement C3	CO3_HUMAN	1	3.29981	1.033	Dengue	QC	NaN	NaN	NaN	49.9656	0.0875553
Dengue / QC	_LYYGDDEKYFR_	P07357	-0.0909503	0.0909503	0.387122	0.146529	132	P07357	C8A	Complement component C8 alpha chain	CO8A_HUMAN	1	-6.10959	0.938904	Dengue	QC	NaN	NaN	NaN	55.608	0.0867375
Dengue / QC	_VTASDPLDTLGSEGALSPGGVASLLR_	P0C0L5	-0.0246186	0.0246186	0.55002	0.193549	176	P0C0L5	C4B	Complement C4-B	CO4B_HUMAN	1	-1.69195	0.98308	Dengue	QC	NaN	NaN	NaN	67.9405	0.125043
Dengue / QC	_SPDVINGSPISQK_	P08603	-0.0587227	0.0587227	0.370504	0.141661	176	P08603	CFH	Complement factor H	CFAH_HUMAN	1	-3.98862	0.960114	Dengue	QC	NaN	NaN	NaN	61.6443	0.0829937
Dengue / QC	_NLDENYC[Carbamidomethyl (C)]RNPDGK_	P00747	0.0548124	0.0548124	0.421239	0.156788	168	P00747	PLG	Plasminogen	PLMN_HUMAN	1	3.8724	1.03872	Dengue	QC	NaN	NaN	NaN	78.8044	0.0924455
Dengue / QC	_VIGNMGQTMEQLTPELK_	P04114	-0.079169	0.079169	0.448002	0.164522	150	P04114	APOB	Apolipoprotein B-100	APOB_HUMAN	1	-5.33972	0.946603	Dengue	QC	NaN	NaN	NaN	57.2478	0.0973628
Dengue / QC	_KIYPTVNC[Carbamidomethyl (C)]QPLGMISLMK_	P01042	-0.00676279	0.00676279	0.421263	0.156788	172	P01042	KNG1	Kininogen-1	KNG1_HUMAN	1	-0.467664	0.995323	Dengue	QC	NaN	NaN	NaN	52.4019	0.0917403
Dengue / QC	_SSFVAPLEK_	P36955	-0.123776	0.123776	0.286342	0.115449	176	P36955	SERPINF1	Pigment epithelium-derived factor	PEDF_HUMAN	1	-8.22175	0.917782	Dengue	QC	NaN	NaN	NaN	57.2886	0.0687394
Dengue / QC	_ENLDRDIALM[Oxidation (M)]K_	P00734	-0.179778	0.179778	0.750411	0.246296	18	P00734	F2	Prothrombin	THRB_HUMAN	1	-11.7161	0.882839	Dengue	QC	NaN	NaN	NaN	6.31659	0.220807
Dengue / QC	_IDVHLVPDR_	P08603	-0.0640949	0.0640949	0.198104	0.0850421	176	P08603	CFH	Complement factor H	CFAH_HUMAN	1	-4.34547	0.956545	Dengue	QC	NaN	NaN	NaN	52.0166	0.0562146
Dengue / QC	_YTC[Carbamidomethyl (C)]QGNSWTPPISNSLTC[Carbamidomethyl (C)]EKDTLTK_	P13671	-0.0169484	0.0169484	0.378614	0.143961	172	P13671	C6	Complement component C6	CO6_HUMAN	1	-1.1679	0.988321	Dengue	QC	NaN	NaN	NaN	48.7933	0.082238
Dengue / QC	_IGESIELTC[Carbamidomethyl (C)]PK_	P13671	-0.0476299	0.0476299	0.258765	0.10611	174	P13671	C6	Complement component C6	CO6_HUMAN	1	-3.24755	0.967525	Dengue	QC	NaN	NaN	NaN	65.0906	0.0635855
Dengue / QC	_HPYFYAPELLFFAK_	P02768	-0.110118	0.110118	0.564801	0.197809	176	P02768	ALB	Serum albumin	ALBU_HUMAN	1	-7.34875	0.926513	Dengue	QC	NaN	NaN	NaN	82.2551	0.124408
Dengue / QC	_TLNIC[Carbamidomethyl (C)]EVGTIR_	P13671	-0.149355	0.149355	0.294962	0.118124	176	P13671	C6	Complement component C6	CO6_HUMAN	1	-9.83466	0.901653	Dengue	QC	NaN	NaN	NaN	72.8394	0.0679782
Dengue / QC	_GGKYAATSQVLLPSKDVMQGTDEHVVC[Carbamidomethyl (C)]K_	P01871	-0.0656042	0.0656042	0.614881	0.211699	156	P01871	IGHM	Immunoglobulin heavy constant mu	IGHM_HUMAN	1	-4.44549	0.955545	Dengue	QC	NaN	NaN	NaN	138.979	0.142031
Dengue / QC	_DSGRDYVSQFEGSALGK_	P02647	-0.0640682	0.0640682	0.256675	0.105418	174	P02647	APOA1	Apolipoprotein A-I	APOA1_HUMAN	1	-4.34371	0.956563	Dengue	QC	NaN	NaN	NaN	150.376	0.0628758
Dengue / QC	_IFTVNHK_	P01024	-0.00474369	0.00474369	0.469126	0.170597	168	P01024	C3	Complement C3	CO3_HUMAN	1	-0.328267	0.996717	Dengue	QC	NaN	NaN	NaN	80.2264	0.0979622
Dengue / QC	_AVSMPSFSILGSDVR_	P04114	-0.136486	0.136486	0.45266	0.165773	168	P04114	APOB	Apolipoprotein B-100	APOB_HUMAN	1	-9.02674	0.909733	Dengue	QC	NaN	NaN	NaN	79.6279	0.0939708
Dengue / QC	_TYFPHFDLSHGSAQVK_	P69905	0.127862	0.127862	0.358497	0.137902	168	P69905	HBA1	Hemoglobin subunit alpha	HBA_HUMAN	1	9.2673	1.09267	Dengue	QC	NaN	NaN	NaN	92.3619	0.0766776
Dengue / QC	_VC[Carbamidomethyl (C)]EGAAC[Carbamidomethyl (C)]K_	P01031	-0.354821	0.354821	0.845782	0.269276	52	P01031	C5	Complement C5	CO5_HUMAN	1	-21.8033	0.781967	Dengue	QC	NaN	NaN	NaN	7.25975	0.348098
Dengue / QC	_WLSEEQR_	P01031	-0.0679499	0.0679499	0.58277	0.202687	160	P01031	C5	Complement C5	CO5_HUMAN	1	-4.60073	0.953993	Dengue	QC	NaN	NaN	NaN	42.8817	0.12618
Dengue / QC	_EQTMSEC[Carbamidomethyl (C)]EAGALR_	P10643	-0.0935722	0.0935722	0.519332	0.18502	172	P10643	C7	Complement component C7	CO7_HUMAN	1	-6.28007	0.937199	Dengue	QC	NaN	NaN	NaN	55.5493	0.107535
Dengue / QC	_QYYEGSEIVVAGR_	P19827	0.0516373	0.0516373	0.568944	0.198958	176	P19827	ITIH1	Inter-alpha-trypsin inhibitor heavy chain H1	ITIH1_HUMAN	1	3.64405	1.03644	Dengue	QC	NaN	NaN	NaN	55.3948	0.121085
Dengue / QC	_GLFEVNPWKR_	H0Y512;Q9HDC9	-0.133168	0.133168	0.61409	0.211464	78	H0Y512;Q9HDC9	APMAP	Adipocyte plasma membrane-associated protein (Fragment);Adipocyte plasma membrane-associated protein	H0Y512_HUMAN;APMAP_HUMAN	1	-8.81728	0.911827	Dengue	QC	NaN	NaN	NaN	28.6857	0.135942
Dengue / QC	_VFSLQWGEVK_	E7ETH0;G3XAM2;P05156	-0.0897344	0.0897344	0.35956	0.138255	160	E7ETH0;G3XAM2;P05156	CFI	Complement factor I	E7ETH0_HUMAN;G3XAM2_HUMAN;CFAI_HUMAN	1	-6.03043	0.939696	Dengue	QC	NaN	NaN	NaN	61.1225	0.0749221
Dengue / QC	_QLGLPGPPDVPDHAAYHPFR_	Q14624	0.1046	0.1046	0.636276	0.217559	142	Q14624	ITIH4	Inter-alpha-trypsin inhibitor heavy chain H4	ITIH4_HUMAN	1	7.51959	1.0752	Dengue	QC	NaN	NaN	NaN	81.5837	0.145672
Dengue / QC	_GMALFGEGK_	P04114	-0.0704892	0.0704892	0.246397	0.101813	176	P04114	APOB	Apolipoprotein B-100	APOB_HUMAN	1	-4.76849	0.952315	Dengue	QC	NaN	NaN	NaN	110.98	0.0592919
Dengue / QC	_LAELPADALGPLQR_	P35858;P35858-2	-0.0325017	0.0325017	0.589745	0.20462	160	P35858;P35858-2	IGFALS	Insulin-like growth factor-binding protein complex acid labile subunit;Isoform 2 of Insulin-like growth factor-binding protein complex acid labile subunit	ALS_HUMAN	1	-2.22766	0.977723	Dengue	QC	NaN	NaN	NaN	48.5824	0.127131
Dengue / QC	_WQEEM[Oxidation (M)]ELYR_	P02647	-0.106012	0.106012	0.289513	0.116351	150	P02647	APOA1	Apolipoprotein A-I	APOA1_HUMAN	1	-7.08469	0.929153	Dengue	QC	NaN	NaN	NaN	107.219	0.0645629
Dengue / QC	_MEEMGSR_	P02649	-0.0320577	0.0320577	0.525841	0.186749	118	P02649	APOE	Apolipoprotein E	APOE_HUMAN	1	-2.19757	0.978024	Dengue	QC	NaN	NaN	NaN	65.9299	0.10696
Dengue / QC	_LPTDSELAPR_	A0A182DWH7;P49908	-0.0612897	0.0612897	0.335411	0.13073	172	A0A182DWH7;P49908	SELENOP	Selenoprotein P (Fragment);Selenoprotein P	A0A182DWH7_HUMAN;SEPP1_HUMAN	1	-4.1593	0.958407	Dengue	QC	NaN	NaN	NaN	62.2239	0.0700203
Dengue / QC	_VSALLTPAEQTGTWK_	P04114	-0.0746765	0.0746765	0.454119	0.166187	174	P04114	APOB	Apolipoprotein B-100	APOB_HUMAN	1	-5.0445	0.949555	Dengue	QC	NaN	NaN	NaN	95.895	0.0899779
Dengue / QC	_QLYGDTGVLGR_	P07360	-0.130132	0.130132	0.436629	0.161207	126	P07360	C8G	Complement component C8 gamma chain	CO8G_HUMAN	1	-8.62521	0.913748	Dengue	QC	NaN	NaN	NaN	89.9881	0.0865509
Dengue / QC	_ILQADQEL_	O14791;O14791-2	-0.076914	0.076914	0.460397	0.168068	138	O14791;O14791-2	APOL1	Apolipoprotein L1;Isoform 2 of Apolipoprotein L1	APOL1_HUMAN	1	-5.19165	0.948083	Dengue	QC	NaN	NaN	NaN	61.8912	0.0905168
Dengue / QC	_NSLKIEIPLPFGGK_	P04114	0.120489	0.120489	0.548409	0.193182	172	P04114	APOB	Apolipoprotein B-100	APOB_HUMAN	1	8.71032	1.0871	Dengue	QC	NaN	NaN	NaN	42.568	0.110729
Dengue / QC	_DQVLVSC[Carbamidomethyl (C)]DTGYK_	P48740	-0.108474	0.108474	0.651695	0.221571	64	P48740	MASP1	Mannan-binding lectin serine protease 1	MASP1_HUMAN	1	-7.24311	0.927569	Dengue	QC	NaN	NaN	NaN	36.0266	0.145906
Dengue / QC	_GC[Carbamidomethyl (C)]PDVQASLPDAK_	Q96PD5	-0.0753097	0.0753097	0.301695	0.120269	136	Q96PD5	PGLYRP2	N-acetylmuramoyl-L-alanine amidase	PGRP2_HUMAN	1	-5.08617	0.949138	Dengue	QC	NaN	NaN	NaN	86.1731	0.0637577
Dengue / QC	_SDLEVAHYK_	P07358	-0.0591635	0.0591635	0.568526	0.198848	174	P07358	C8B	Complement component C8 beta chain	CO8B_HUMAN	1	-4.01795	0.95982	Dengue	QC	NaN	NaN	NaN	61.4125	0.114887
Dengue / QC	_SVFLHAR_	P07358	0.0418387	0.0418387	0.629569	0.215684	124	P07358	C8B	Complement component C8 beta chain	CO8B_HUMAN	1	2.9425	1.02943	Dengue	QC	NaN	NaN	NaN	37.6703	0.135026
Dengue / QC	_IM[Oxidation (M)]NGEADAMSLDGGFVYIAGK_	P02787	-0.00634877	0.00634877	0.688005	0.230882	72	P02787	TF	Serotransferrin	TRFE_HUMAN	1	-0.439097	0.995609	Dengue	QC	NaN	NaN	NaN	31.8275	0.162017
Dengue / QC	_TYMLAFDVNDEK_	P02763	-0.120378	0.120378	0.504799	0.180879	148	P02763	ORM1	Alpha-1-acid glycoprotein 1	A1AG1_HUMAN	1	-8.00536	0.919946	Dengue	QC	NaN	NaN	NaN	105.921	0.0977176
Dengue / QC	_LSC[Carbamidomethyl (C)]AASGFTFDDYAMHWVR_	P01782	-0.0615853	0.0615853	0.720663	0.239085	166	P01782	IGHV3-9	Immunoglobulin heavy variable 3-9	HV309_HUMAN	1	-4.17894	0.958211	Dengue	QC	NaN	NaN	NaN	124.831	0.182121
Dengue / QC	_YHWEHTGLTLR_	P04114	-0.458486	0.458486	0.947426	0.292647	120	P04114	APOB	Apolipoprotein B-100	APOB_HUMAN	1	-27.225	0.72775	Dengue	QC	NaN	NaN	NaN	19.682	0.975215
Dengue / QC	_RPQGSTC[Carbamidomethyl (C)]RDHENELLNK_	B4E1Z4	0.00152552	0.00152552	0.666254	0.225273	64	B4E1Z4	NaN	cDNA FLJ55673, highly similar to Complement factor B (EC 3.4.21.47)	B4E1Z4_HUMAN	1	0.105797	1.00106	Dengue	QC	NaN	NaN	NaN	20.6816	0.148695
Dengue / QC	_FNKNNEGT[Phospho (STY)]YYSPNYNPQSR_	P00450	-0.402142	0.402142	0.579841	0.201912	66	P00450	CP	Ceruloplasmin	CERU_HUMAN	1	-24.3266	0.756734	Dengue	QC	NaN	NaN	NaN	4.92866	0.108516
Dengue / QC	_SRATLYALSHAVNNYHK_	P04114	-0.0733676	0.0733676	0.63135	0.216144	142	P04114	APOB	Apolipoprotein B-100	APOB_HUMAN	1	-4.95831	0.950417	Dengue	QC	NaN	NaN	NaN	46.8643	0.13305
Dengue / QC	_DLKVEDIPLAR_	P04114	0.0239968	0.0239968	0.397375	0.1496	176	P04114	APOB	Apolipoprotein B-100	APOB_HUMAN	1	1.67724	1.01677	Dengue	QC	NaN	NaN	NaN	64.3152	0.0750411
Dengue / QC	_LASPGFPGEYANDQER_	O00187	0.00378778	0.00378778	0.541597	0.191179	30	O00187	MASP2	Mannan-binding lectin serine protease 2	MASP2_HUMAN	1	0.262894	1.00263	Dengue	QC	NaN	NaN	NaN	17.9426	0.102594
Dengue / QC	_HVVPNEVVVQR_	P06396	-0.05623	0.05623	0.353538	0.136376	176	P06396	GSN	Gelsolin	GELS_HUMAN	1	-3.82259	0.961774	Dengue	QC	NaN	NaN	NaN	88.5515	0.0680979
Dengue / QC	_KSPQELLC[Carbamidomethyl (C)]GASLISDR_	P00734	-0.0888991	0.0888991	0.394437	0.1488	138	P00734	F2	Prothrombin	THRB_HUMAN	1	-5.976	0.94024	Dengue	QC	NaN	NaN	NaN	84.2845	0.0738615
Dengue / QC	_FEDGVLDPDYPR_	P04004	-0.0990212	0.0990212	0.421995	0.15698	172	P04004	VTN	Vitronectin	VTNC_HUMAN	1	-6.63338	0.933666	Dengue	QC	NaN	NaN	NaN	110.073	0.0782298
Dengue / QC	_DTGTYGFLLPER_	A0A087WSY5;Q96IY4	-0.0649314	0.0649314	0.45712	0.167062	154	A0A087WSY5;Q96IY4	CPB2	Carboxypeptidase B2	A0A087WSY5_HUMAN;CBPB2_HUMAN	1	-4.40093	0.955991	Dengue	QC	NaN	NaN	NaN	69.918	0.0842069
Dengue / QC	_NWRDPDQTDGLGLSYLSSHIANVER_	P06396	-0.151344	0.151344	0.524639	0.186494	156	P06396	GSN	Gelsolin	GELS_HUMAN	1	-9.95886	0.900411	Dengue	QC	NaN	NaN	NaN	74.6695	0.0984839
Dengue / QC	_SLPVSDSVLSGFEQR_	P07360	-0.0272774	0.0272774	0.451404	0.165445	176	P07360	C8G	Complement component C8 gamma chain	CO8G_HUMAN	1	-1.87296	0.98127	Dengue	QC	NaN	NaN	NaN	62.708	0.0827561
Dengue / QC	_NALFC[Carbamidomethyl (C)]LESAWK_	P01023	-0.0365281	0.0365281	0.556276	0.195321	176	P01023	A2M	Alpha-2-macroglobulin	A2MG_HUMAN	1	-2.50015	0.974999	Dengue	QC	NaN	NaN	NaN	122.073	0.106247
Dengue / QC	_SKEQLTPLIKK_	P02652;V9GYM3	0.0021823	0.0021823	0.698158	0.23342	94	P02652;V9GYM3	APOA2	Apolipoprotein A-II	APOA2_HUMAN;V9GYM3_HUMAN	1	0.15138	1.00151	Dengue	QC	NaN	NaN	NaN	50.4299	0.160582
Dengue / QC	_FYYIYNEK_	P01024	-0.0399755	0.0399755	0.422481	0.157088	162	P01024	C3	Complement C3	CO3_HUMAN	1	-2.73286	0.972671	Dengue	QC	NaN	NaN	NaN	96.1462	0.0775412
Dengue / QC	_GVKGDEC[Carbamidomethyl (C)]QLC[Carbamidomethyl (C)]EVENR_	O75882;O75882-2;O75882-3	0.00544636	0.00544636	0.577963	0.201416	174	O75882;O75882-2;O75882-3	ATRN	Attractin;Isoform 2 of Attractin;Isoform 3 of Attractin	ATRN_HUMAN	1	0.378226	1.00378	Dengue	QC	NaN	NaN	NaN	51.7602	0.110623
Dengue / QC	_TGISPLALIK_	P04114	-0.13791	0.13791	0.403533	0.151558	154	P04114	APOB	Apolipoprotein B-100	APOB_HUMAN	1	-9.11649	0.908835	Dengue	QC	NaN	NaN	NaN	94.1861	0.0737761
Dengue / QC	_IHWESASLLR_	P01024	-0.0622205	0.0622205	0.321492	0.126553	176	P01024	C3	Complement C3	CO3_HUMAN	1	-4.22112	0.957789	Dengue	QC	NaN	NaN	NaN	61.9548	0.0619065
Dengue / QC	_LAGKPTHVNVSVVMAEVDGTC[Carbamidomethyl (C)]Y_	A0A0G2JMB2	-0.523815	0.523815	0.87141	0.275265	30	A0A0G2JMB2	IGHA2	Immunoglobulin heavy constant alpha 2 (Fragment)	A0A0G2JMB2_HUMAN	1	-30.447	0.69553	Dengue	QC	NaN	NaN	NaN	2.30671	0.34214
Dengue / QC	_LQDNELR_	Q6EMK4	1.93987	1.93987	0.898338	0.281792	28	Q6EMK4	VASN	Vasorin	VASN_HUMAN	1	283.67	3.8367	Dengue	QC	NaN	NaN	NaN	14.3848	0.474319
Dengue / QC	_DQFNLIVFSTEATQWRPSLVPASAENVNK_	Q14624	0.349416	0.349416	0.704669	0.235039	132	Q14624	ITIH4	Inter-alpha-trypsin inhibitor heavy chain H4	ITIH4_HUMAN	1	27.4044	1.27404	Dengue	QC	NaN	NaN	NaN	27.6836	0.160567
Dengue / QC	_GVC[Carbamidomethyl (C)]EETSGAYEKTDTDGK_	P02760	-0.0248867	0.0248867	0.654086	0.222187	118	P02760	AMBP	Protein AMBP	AMBP_HUMAN	1	-1.71022	0.982898	Dengue	QC	NaN	NaN	NaN	111.117	0.136642
Dengue / QC	_GMADQDGLKPTIDKPSEDSPPLEMLGPR_	P19827	-0.0708203	0.0708203	0.593642	0.205688	176	P19827	ITIH1	Inter-alpha-trypsin inhibitor heavy chain H1	ITIH1_HUMAN	1	-4.79035	0.952096	Dengue	QC	NaN	NaN	NaN	45.6818	0.114126
Dengue / QC	_EVSSC[Carbamidomethyl (C)]HC[Carbamidomethyl (C)]APC[Carbamidomethyl (C)]QGNGVPVLK_	P07358	0.103991	0.103991	0.681143	0.229152	88	P07358	C8B	Complement component C8 beta chain	CO8B_HUMAN	1	7.47427	1.07474	Dengue	QC	NaN	NaN	NaN	43.1303	0.148029
Dengue / QC	_STSESTAALGC[Carbamidomethyl (C)]LVK_	P01861	-0.0498062	0.0498062	0.734191	0.242309	176	P01861	IGHG4	Immunoglobulin heavy constant gamma 4	IGHG4_HUMAN	1	-3.39339	0.966066	Dengue	QC	NaN	NaN	NaN	51.3574	0.179186
Dengue / QC	_KLDGIC[Carbamidomethyl (C)]WQVR_	P07360	-0.0646163	0.0646163	0.313784	0.124162	150	P07360	C8G	Complement component C8 gamma chain	CO8G_HUMAN	1	-4.38004	0.9562	Dengue	QC	NaN	NaN	NaN	83.9816	0.0602569
Dengue / QC	_KLGQSLDC[Carbamidomethyl (C)]NAEVYVVPWEK_	P01042	-0.0980427	0.0980427	0.529913	0.187859	176	P01042	KNG1	Kininogen-1	KNG1_HUMAN	1	-6.57003	0.9343	Dengue	QC	NaN	NaN	NaN	52.0482	0.0965226
Dengue / QC	_C[Carbamidomethyl (C)]TLKPC[Carbamidomethyl (C)]DYPDIK_	P08603	-0.0483796	0.0483796	0.503817	0.180583	174	P08603	CFH	Complement factor H	CFAH_HUMAN	1	-3.29782	0.967022	Dengue	QC	NaN	NaN	NaN	33.7088	0.0900487
Dengue / QC	_ADGESC[Carbamidomethyl (C)]SASMMYQEGK_	P01008	-0.0589583	0.0589583	0.616428	0.212092	176	P01008	SERPINC1	Antithrombin-III	ANT3_HUMAN	1	-4.0043	0.959957	Dengue	QC	NaN	NaN	NaN	53.3186	0.12066
Dengue / QC	_LKGPLLNK_	P01024	-0.436375	0.436375	0.707176	0.235603	64	P01024	C3	Complement C3	CO3_HUMAN	1	-26.1011	0.738989	Dengue	QC	NaN	NaN	NaN	27.0368	0.159569
Dengue / QC	_SLAPTAAAK_	P19823	-0.0498713	0.0498713	0.444301	0.163454	166	P19823	ITIH2	Inter-alpha-trypsin inhibitor heavy chain H2	ITIH2_HUMAN	1	-3.39775	0.966022	Dengue	QC	NaN	NaN	NaN	84.8584	0.0788016
Dengue / QC	_EEYSNLKLPR_	O75882;O75882-2;O75882-3	-0.0544622	0.0544622	0.670819	0.226511	148	O75882;O75882-2;O75882-3	ATRN	Attractin;Isoform 2 of Attractin;Isoform 3 of Attractin	ATRN_HUMAN	1	-3.70466	0.962953	Dengue	QC	NaN	NaN	NaN	42.9444	0.141193
Dengue / QC	_LC[Carbamidomethyl (C)]M[Oxidation (M)]GSGLNLC[Carbamidomethyl (C)]EPNNKEGYYGYTGAFR_	P02787	0.551001	0.551001	0.776749	0.252926	176	P02787	TF	Serotransferrin	TRFE_HUMAN	1	46.5102	1.4651	Dengue	QC	NaN	NaN	NaN	43.1816	0.209051
Dengue / QC	_C[Carbamidomethyl (C)]LAPLEGAR_	P04217	-0.0445269	0.0445269	0.518076	0.184684	176	P04217	A1BG	Alpha-1B-glycoprotein	A1BG_HUMAN	1	-3.03923	0.969608	Dengue	QC	NaN	NaN	NaN	51.6478	0.0916377
Dengue / QC	_C[Carbamidomethyl (C)]YTAVVPLVYGGETK_	P01591	-0.0598531	0.0598531	0.599243	0.207245	176	P01591	JCHAIN	Immunoglobulin J chain	IGJ_HUMAN	1	-4.06382	0.959362	Dengue	QC	NaN	NaN	NaN	97.335	0.11309
Dengue / QC	_SLAELGGHLDQQVEEFR_	P06727	0.0872109	0.0872109	0.772826	0.251961	168	P06727	APOA4	Apolipoprotein A-IV	APOA4_HUMAN	1	6.23144	1.06231	Dengue	QC	NaN	NaN	NaN	36.008	0.204348
Dengue / QC	_DADPDTFFAK_	P43652	-0.085951	0.085951	0.382797	0.145234	158	P43652	AFM	Afamin	AFAM_HUMAN	1	-5.78367	0.942163	Dengue	QC	NaN	NaN	NaN	91.1675	0.0677312
Dengue / QC	_QINSYVK_	P08185	0.0513799	0.0513799	0.803426	0.259083	48	P08185	SERPINA6	Corticosteroid-binding globulin	CBG_HUMAN	1	3.62556	1.03626	Dengue	QC	NaN	NaN	NaN	7.52853	0.230172
Dengue / QC	_WEYC[Carbamidomethyl (C)]NLK_	P00747	-0.104905	0.104905	0.36759	0.140771	166	P00747	PLG	Plasminogen	PLMN_HUMAN	1	-7.01337	0.929866	Dengue	QC	NaN	NaN	NaN	65.8883	0.0652683
Dengue / QC	_LGVRPSQGGEAPR_	P02751;P02751-15;P02751-3;P02751-7	0.326743	0.326743	0.723927	0.23984	160	P02751;P02751-15;P02751-3;P02751-7	FN1	Fibronectin;Isoform 15 of Fibronectin;Isoform 3 of Fibronectin;Isoform 7 of Fibronectin	FINC_HUMAN	1	25.4179	1.25418	Dengue	QC	NaN	NaN	NaN	32.1309	0.16607
Dengue / QC	_NIPC[Carbamidomethyl (C)]AVTKR_	P13671	-0.128584	0.128584	0.676667	0.227992	84	P13671	C6	Complement component C6	CO6_HUMAN	1	-8.52715	0.914729	Dengue	QC	NaN	NaN	NaN	58.0979	0.140756
Dengue / QC	_TWNQSIALR_	A0A0A0MRJ7;P12259	1.75837	1.75837	0.902743	0.282507	20	A0A0A0MRJ7;P12259	F5	Coagulation factor V	A0A0A0MRJ7_HUMAN;FA5_HUMAN	1	238.316	3.38316	Dengue	QC	NaN	NaN	NaN	11.9737	0.47261
Dengue / QC	_DTLPSC[Carbamidomethyl (C)]AVR_	Q96PD5	-0.0348719	0.0348719	0.51477	0.183733	140	Q96PD5	PGLYRP2	N-acetylmuramoyl-L-alanine amidase	PGRP2_HUMAN	1	-2.38816	0.976118	Dengue	QC	NaN	NaN	NaN	32.5806	0.0890979
Dengue / QC	_C[Carbamidomethyl (C)]NGDNDC[Carbamidomethyl (C)]GDFSDEDDC[Carbamidomethyl (C)]ESEPRPPC[Carbamidomethyl (C)]R_	P02748	0.0323098	0.0323098	0.607638	0.209556	164	P02748	C9	Complement component C9	CO9_HUMAN	1	2.26481	1.02265	Dengue	QC	NaN	NaN	NaN	54.8129	0.113178
Dengue / QC	_EELVYELNPLDHR_	P0C0L5	-0.0823371	0.0823371	0.533074	0.188699	174	P0C0L5	C4B	Complement C4-B	CO4B_HUMAN	1	-5.54737	0.944526	Dengue	QC	NaN	NaN	NaN	71.1738	0.092681
Dengue / QC	_LLQEGQALEYVC[Carbamidomethyl (C)]PSGFYPYPVQTR_	B4E1Z4	-0.0160594	0.0160594	0.719959	0.23891	176	B4E1Z4	NaN	cDNA FLJ55673, highly similar to Complement factor B (EC 3.4.21.47)	B4E1Z4_HUMAN	1	-1.10698	0.98893	Dengue	QC	NaN	NaN	NaN	51.5188	0.160548
Dengue / QC	_VLFYVDSEK_	P10643	-0.144242	0.144242	0.522395	0.185822	164	P10643	C7	Complement component C7	CO7_HUMAN	1	-9.51456	0.904854	Dengue	QC	NaN	NaN	NaN	96.3923	0.0900882
Dengue / QC	_GRPPKAGAEPASER_	P01042-2	0.657197	0.657197	0.913496	0.285066	78	P01042-2	KNG1	Isoform LMW of Kininogen-1	KNG1_HUMAN	1	57.7016	1.57702	Dengue	QC	NaN	NaN	NaN	7.08867	0.512618
Dengue / QC	_DGYLFQLLR_	P04196	0.114871	0.114871	0.477218	0.173027	174	P04196	HRG	Histidine-rich glycoprotein	HRG_HUMAN	1	8.2878	1.08288	Dengue	QC	NaN	NaN	NaN	71.9804	0.0807277
Dengue / QC	_PAFSAIR_	P02745	-0.089347	0.089347	0.518875	0.184901	86	P02745	C1QA	Complement C1q subcomponent subunit A	C1QA_HUMAN	1	-6.00519	0.939948	Dengue	QC	NaN	NaN	NaN	52.1717	0.088517
Dengue / QC	_LKEGMLSIMSYR_	P01031	-0.065822	0.065822	0.608484	0.209784	136	P01031	C5	Complement C5	CO5_HUMAN	1	-4.45992	0.955401	Dengue	QC	NaN	NaN	NaN	45.5305	0.111144
Dengue / QC	_DIC[Carbamidomethyl (C)]EEQVNSLPGSITK_	P01024	-0.0568157	0.0568157	0.346176	0.134038	176	P01024	C3	Complement C3	CO3_HUMAN	1	-3.86162	0.961384	Dengue	QC	NaN	NaN	NaN	104.455	0.0604777
Dengue / QC	_TKNSEEFAAAMSR_	P04114	-0.0390747	0.0390747	0.723767	0.239801	136	P04114	APOB	Apolipoprotein B-100	APOB_HUMAN	1	-2.6721	0.973279	Dengue	QC	NaN	NaN	NaN	48.8811	0.159641
Dengue / QC	_AEVDDVIQVR_	A0A0A0MRJ7;P12259	-0.0835889	0.0835889	0.460655	0.168134	94	A0A0A0MRJ7;P12259	F5	Coagulation factor V	A0A0A0MRJ7_HUMAN;FA5_HUMAN	1	-5.62929	0.943707	Dengue	QC	NaN	NaN	NaN	48.2765	0.0761011
Dengue / QC	_KIYPTVNC[Carbamidomethyl (C)]QPLGMISLM[Oxidation (M)]K_	P01042	-0.153845	0.153845	0.687154	0.230679	30	P01042	KNG1	Kininogen-1	KNG1_HUMAN	1	-10.1148	0.898852	Dengue	QC	NaN	NaN	NaN	10.2378	0.136104
Dengue / QC	_SIEVFGQFNGKR_	P02748	-0.0628076	0.0628076	0.517011	0.184407	176	P02748	C9	Complement component C9	CO9_HUMAN	1	-4.26009	0.957399	Dengue	QC	NaN	NaN	NaN	105.102	0.0867229
Dengue / QC	_QVFLYPEKDEPTYILNIK_	P04114	0.0924669	0.0924669	0.652423	0.221753	166	P04114	APOB	Apolipoprotein B-100	APOB_HUMAN	1	6.61917	1.06619	Dengue	QC	NaN	NaN	NaN	34.1006	0.123717
Dengue / QC	_QVFAVQR_	P08246	-0.0415958	0.0415958	0.798441	0.257951	96	P08246	ELANE	Neutrophil elastase	ELNE_HUMAN	1	-2.84203	0.97158	Dengue	QC	NaN	NaN	NaN	88.8724	0.216451
Dengue / QC	_EVVADSVWVDVK_	P01024	-0.0762996	0.0762996	0.487196	0.175783	170	P01024	C3	Complement C3	CO3_HUMAN	1	-5.15127	0.948487	Dengue	QC	NaN	NaN	NaN	89.4405	0.0792471
Dengue / QC	_LNNGEITQHRK_	P04003	0.189884	0.189884	0.895475	0.281115	134	P04003	C4BPA	C4b-binding protein alpha chain	C4BPA_HUMAN	1	14.0672	1.14067	Dengue	QC	NaN	NaN	NaN	22.4129	0.415182
Dengue / QC	_VEKPTADAEAYVFTPNMIC[Carbamidomethyl (C)]AGGEK_	P09871	-0.0972063	0.0972063	0.506094	0.181219	174	P09871	C1S	Complement C1s subcomponent	C1S_HUMAN	1	-6.51585	0.934842	Dengue	QC	NaN	NaN	NaN	56.8139	0.0822625
Dengue / QC	_ELRPWC[Carbamidomethyl (C)]FTTDPNKR_	P00747	-0.00193638	0.00193638	0.38346	0.145431	166	P00747	PLG	Plasminogen	PLMN_HUMAN	1	-0.13413	0.998659	Dengue	QC	NaN	NaN	NaN	94.9103	0.0626694
Dengue / QC	_NYAEAKDVFLGMFLYEYAR_	P02768	0.354049	0.354049	0.853084	0.270915	176	P02768	ALB	Serum albumin	ALBU_HUMAN	1	27.8143	1.27814	Dengue	QC	NaN	NaN	NaN	32.6535	0.291264
Dengue / QC	_GVGWSHPLPQC[Carbamidomethyl (C)]EIVK_	P04003	-0.033427	0.033427	0.287924	0.115909	176	P04003	C4BPA	C4b-binding protein alpha chain	C4BPA_HUMAN	1	-2.29035	0.977097	Dengue	QC	NaN	NaN	NaN	87.9503	0.0504804
Dengue / QC	_ALNHLPLEYNSALYSR_	P13671	-0.171349	0.171349	0.488924	0.176175	80	P13671	C6	Complement component C6	CO6_HUMAN	1	-11.1988	0.888012	Dengue	QC	NaN	NaN	NaN	54.83	0.0774069
Dengue / QC	_SSEDPNEDIVER_	P01591	0.0158922	0.0158922	0.694452	0.232478	176	P01591	JCHAIN	Immunoglobulin J chain	IGJ_HUMAN	1	1.10766	1.01108	Dengue	QC	NaN	NaN	NaN	71.6856	0.136572
Dengue / QC	_EKC[Carbamidomethyl (C)]FEPQLLR_	P00748	0.0454323	0.0454323	0.571701	0.199704	164	P00748	F12	Coagulation factor XII	FA12_HUMAN	1	3.19924	1.03199	Dengue	QC	NaN	NaN	NaN	72.141	0.0946142
Dengue / QC	_QLNEINYEDHKLK_	B4E1Z4	0.0527242	0.0527242	0.706848	0.235534	176	B4E1Z4	NaN	cDNA FLJ55673, highly similar to Complement factor B (EC 3.4.21.47)	B4E1Z4_HUMAN	1	3.72216	1.03722	Dengue	QC	NaN	NaN	NaN	50.9437	0.142123
Dengue / QC	_SFQTGLFTAAR_	P07225	-0.0666496	0.0666496	0.515094	0.183826	144	P07225	PROS1	Vitamin K-dependent protein S	PROS_HUMAN	1	-4.51471	0.954853	Dengue	QC	NaN	NaN	NaN	72.8563	0.0817971
Dengue / QC	_VKYTLNK_	P04114	-0.316771	0.316771	0.784661	0.254746	58	P04114	APOB	Apolipoprotein B-100	APOB_HUMAN	1	-19.7135	0.802865	Dengue	QC	NaN	NaN	NaN	18.0854	0.19265
Dengue / QC	_SIEVFGQFNGK_	P02748	-0.00447154	0.00447154	0.584362	0.203106	100	P02748	C9	Complement component C9	CO9_HUMAN	1	-0.309463	0.996905	Dengue	QC	NaN	NaN	NaN	61.2964	0.0952323
Dengue / QC	_WKNFPSPVDAAFR_	P02790	-0.0348722	0.0348722	0.53638	0.189662	176	P02790	HPX	Hemopexin	HEMO_HUMAN	1	-2.38818	0.976118	Dengue	QC	NaN	NaN	NaN	58.9575	0.0834609
Dengue / QC	_VKDLATVYVDVLKDSGR_	P02647	-0.196019	0.196019	0.556664	0.195437	170	P02647	APOA1	Apolipoprotein A-I	APOA1_HUMAN	1	-12.7044	0.872956	Dengue	QC	NaN	NaN	NaN	51.2952	0.0877082
Dengue / QC	_EVQGFESATFLGYFK_	P06396	-0.0317961	0.0317961	0.747659	0.245699	172	P06396	GSN	Gelsolin	GELS_HUMAN	1	-2.17983	0.978202	Dengue	QC	NaN	NaN	NaN	43.8849	0.160029
Dengue / QC	_LTISKDTSK_	A0A0C4DH43	0.457643	0.457643	0.798789	0.25802	104	A0A0C4DH43	IGHV2-70D	Immunoglobulin heavy variable 2-70D	HV70D_HUMAN	1	37.3296	1.3733	Dengue	QC	NaN	NaN	NaN	43.4752	0.200423
Dengue / QC	_TPGAAANLELIFVGPQHAGNYR_	P04217	-0.0834444	0.0834444	0.722134	0.239411	176	P04217	A1BG	Alpha-1B-glycoprotein	A1BG_HUMAN	1	-5.61984	0.943802	Dengue	QC	NaN	NaN	NaN	51.0619	0.142574
Dengue / QC	_LEALKENGGAR_	P02647	-0.0401703	0.0401703	0.714971	0.237608	148	P02647	APOA1	Apolipoprotein A-I	APOA1_HUMAN	1	-2.74598	0.97254	Dengue	QC	NaN	NaN	NaN	36.7642	0.138111
Dengue / QC	_NEC[Carbamidomethyl (C)]FLQHK_	P02768	0.0696875	0.0696875	0.584324	0.203105	132	P02768	ALB	Serum albumin	ALBU_HUMAN	1	4.94893	1.04949	Dengue	QC	NaN	NaN	NaN	92.8358	0.0925527
Dengue / QC	_IVSSAM[Oxidation (M)]EPDREYHFGQAVR_	P08603	-0.0670773	0.0670773	0.671855	0.226755	156	P08603	CFH	Complement factor H	CFAH_HUMAN	1	-4.54302	0.95457	Dengue	QC	NaN	NaN	NaN	83.9683	0.118975
Dengue / QC	_LLPAQLPAEKEVGPPLPQEAVPLQK_	Q16610	-0.0899447	0.0899447	0.711412	0.236631	144	Q16610	ECM1	Extracellular matrix protein 1	ECM1_HUMAN	1	-6.04412	0.939559	Dengue	QC	NaN	NaN	NaN	45.876	0.135255
Dengue / QC	_ALYYDLISSPDIHGTYK_	P36955	-0.114919	0.114919	0.593821	0.2057	134	P36955	SERPINF1	Pigment epithelium-derived factor	PEDF_HUMAN	1	-7.6566	0.923434	Dengue	QC	NaN	NaN	NaN	49.8373	0.0921532
Dengue / QC	_YVTSAPM[Oxidation (M)]PEPQAPGR_	P01871	-0.0120851	0.0120851	0.848033	0.269677	176	P01871	IGHM	Immunoglobulin heavy constant mu	IGHM_HUMAN	1	-0.834176	0.991658	Dengue	QC	NaN	NaN	NaN	169.118	0.256775
Dengue / QC	_RELDESLQVAER_	P10909;P10909-2;P10909-4;P10909-5	-0.0695417	0.0695417	0.710562	0.236417	138	P10909;P10909-2;P10909-4;P10909-5	CLU	Clusterin;Isoform 2 of Clusterin;Isoform 4 of Clusterin;Isoform 5 of Clusterin	CLUS_HUMAN	1	-4.70593	0.952941	Dengue	QC	NaN	NaN	NaN	41.7877	0.131732
Dengue / QC	_C[Carbamidomethyl (C)]C[Carbamidomethyl (C)]TESLVNR_	P02768	-0.118572	0.118572	0.702366	0.234474	176	P02768	ALB	Serum albumin	ALBU_HUMAN	1	-7.89013	0.921099	Dengue	QC	NaN	NaN	NaN	68.2262	0.126828
Dengue / QC	_ITGYIIKYEKPGSPPR_	P02751;P02751-15;P02751-3;P02751-7	-0.0164685	0.0164685	0.621269	0.213414	164	P02751;P02751-15;P02751-3;P02751-7	FN1	Fibronectin;Isoform 15 of Fibronectin;Isoform 3 of Fibronectin;Isoform 7 of Fibronectin	FINC_HUMAN	1	-1.13502	0.98865	Dengue	QC	NaN	NaN	NaN	62.8321	0.0974263
Dengue / QC	_ATVVYQGER_	P02749	-0.241671	0.241671	0.594448	0.205855	176	P02749	APOH	Beta-2-glycoprotein 1	APOH_HUMAN	1	-15.4235	0.845765	Dengue	QC	NaN	NaN	NaN	65.646	0.089963
Dengue / QC	_VVLVAVDKGVFVLNK_	P01024	-0.0578541	0.0578541	0.538416	0.190289	154	P01024	C3	Complement C3	CO3_HUMAN	1	-3.9308	0.960692	Dengue	QC	NaN	NaN	NaN	72.6287	0.077438
Dengue / QC	_GKEGWIHTVC[Carbamidomethyl (C)]INGR_	P08603	-0.0661908	0.0661908	0.557076	0.195543	176	P08603	CFH	Complement factor H	CFAH_HUMAN	1	-4.48434	0.955157	Dengue	QC	NaN	NaN	NaN	57.0859	0.0808323
Dengue / QC	_LSSGLVTAALYGR_	P43251;P43251-2;P43251-3;P43251-4	-0.13718	0.13718	0.702856	0.234583	174	P43251;P43251-2;P43251-3;P43251-4	BTD	Biotinidase;Isoform 2 of Biotinidase;Isoform 3 of Biotinidase;Isoform 4 of Biotinidase	BTD_HUMAN	1	-9.07053	0.909295	Dengue	QC	NaN	NaN	NaN	58.3424	0.122872
Dengue / QC	_GWVIHPLGLR_	P02730	0.10047	0.10047	0.203568	0.0869806	22	P02730	SLC4A1	Band 3 anion transport protein	B3AT_HUMAN	1	7.2123	1.07212	Dengue	QC	NaN	NaN	NaN	13.1501	0.0351363
Dengue / QC	_TASDFITK_	P06396	-0.0293062	0.0293062	0.591087	0.204962	156	P06396	GSN	Gelsolin	GELS_HUMAN	1	-2.01085	0.979891	Dengue	QC	NaN	NaN	NaN	74.4367	0.0868621
Dengue / QC	_VDSHFRQGIPFFGQVR_	P01023	0.0437864	0.0437864	0.704916	0.23504	166	P01023	A2M	Alpha-2-macroglobulin	A2MG_HUMAN	1	3.08157	1.03082	Dengue	QC	NaN	NaN	NaN	95.1686	0.122435
Dengue / QC	_GVTSVSQIFHSPDLAIR_	P05155;P05155-3	-0.201166	0.201166	0.671343	0.226635	160	P05155;P05155-3	SERPING1	Plasma protease C1 inhibitor;Isoform 3 of Plasma protease C1 inhibitor	IC1_HUMAN	1	-13.0153	0.869847	Dengue	QC	NaN	NaN	NaN	73.1558	0.109078
Dengue / QC	_HVAEAIC[Carbamidomethyl (C)]KEQHLFLPFSYK_	P04114	-0.0223796	0.0223796	0.576366	0.201005	152	P04114	APOB	Apolipoprotein B-100	APOB_HUMAN	1	-1.53927	0.984607	Dengue	QC	NaN	NaN	NaN	61.9219	0.0823789
Dengue / QC	_NMEVSVATTTK_	P04114	-0.0722133	0.0722133	0.544232	0.191933	176	P04114	APOB	Apolipoprotein B-100	APOB_HUMAN	1	-4.88223	0.951178	Dengue	QC	NaN	NaN	NaN	93.9325	0.0758614
Dengue / QC	_QIQVFEDEPAR_	Q9NPH3;Q9NPH3-2;Q9NPH3-5	0.181628	0.181628	0.722311	0.239456	52	Q9NPH3;Q9NPH3-2;Q9NPH3-5	IL1RAP	Interleukin-1 receptor accessory protein;Isoform 2 of Interleukin-1 receptor accessory protein;Isoform 4 of Interleukin-1 receptor accessory protein	IL1AP_HUMAN	1	13.4163	1.13416	Dengue	QC	NaN	NaN	NaN	15.6865	0.126811
Dengue / QC	_AVVFLEPQWYR_	A0A1W2PQB1;H0Y755;M9MML0;P08637	-0.104107	0.104107	0.768961	0.250999	168	A0A1W2PQB1;H0Y755;M9MML0;P08637	FCGR3A	Fc of IgG low affinity IIIa receptor isoform 1;Low affinity immunoglobulin gamma Fc region receptor III-A (Fragment);Low affinity immunoglobulin gamma Fc region receptor III-A;Low affinity immunoglobulin gamma Fc region receptor III-A	A0A1W2PQB1_HUMAN;H0Y755_HUMAN;M9MML0_HUMAN;FCG3A_HUMAN	1	-6.96192	0.930381	Dengue	QC	NaN	NaN	NaN	65.4768	0.155506
Dengue / QC	_C[Carbamidomethyl (C)]HPGYKPTTDEPTTVIC[Carbamidomethyl (C)]QK_	P04003	-0.0206899	0.0206899	0.574127	0.200394	174	P04003	C4BPA	C4b-binding protein alpha chain	C4BPA_HUMAN	1	-1.42388	0.985761	Dengue	QC	NaN	NaN	NaN	50.0877	0.080503
Dengue / QC	_LIYAASSLQSGVPSR_	P01599	-0.0303179	0.0303179	0.665674	0.225124	158	P01599	IGKV1-17	Immunoglobulin kappa variable 1-17	KV117_HUMAN	1	-2.07955	0.979204	Dengue	QC	NaN	NaN	NaN	103.024	0.103875
Dengue / QC	_EYLIM[Oxidation (M)]GLDGATYDLEGHPQYLLDSNSWIEEMPSER_	P0C0L5	1.41468	1.41468	0.949332	0.293016	136	P0C0L5	C4B	Complement C4-B	CO4B_HUMAN	1	166.601	2.66601	Dengue	QC	NaN	NaN	NaN	12.6255	0.693535
Dengue / QC	_NHSC[Carbamidomethyl (C)]EPC[Carbamidomethyl (C)]QTLAVR_	P00748	3.7638	3.7638	0.982039	0.300348	30	P00748	F12	Coagulation factor XII	FA12_HUMAN	1	1258.37	13.5837	Dengue	QC	NaN	NaN	NaN	3.10644	1.83438
Dengue / QC	_GFVVAGPSR_	P13671	-0.060032	0.060032	0.541489	0.191153	162	P13671	C6	Complement component C6	CO6_HUMAN	1	-4.07571	0.959243	Dengue	QC	NaN	NaN	NaN	67.6628	0.0725599
Dengue / QC	_SPSQADINK_	P04114	-0.232927	0.232927	0.584898	0.203231	84	P04114	APOB	Apolipoprotein B-100	APOB_HUMAN	1	-14.9093	0.850907	Dengue	QC	NaN	NaN	NaN	47.7241	0.0808055
Dengue / QC	_KPAITYGTR_	Q96KN2	-0.025664	0.025664	0.830282	0.265399	98	Q96KN2	CNDP1	Beta-Ala-His dipeptidase	CNDP1_HUMAN	1	-1.76316	0.982368	Dengue	QC	NaN	NaN	NaN	32.2805	0.205027
Dengue / QC	_IYISGMAPRPSLAK_	P04004	0.00740914	0.00740914	0.557068	0.195543	176	P04004	VTN	Vitronectin	VTNC_HUMAN	1	0.514884	1.00515	Dengue	QC	NaN	NaN	NaN	68.7874	0.0749933
Dengue / QC	_EFMEEVIQR_	P04275	1.37145	1.37145	0.907277	0.283616	24	P04275	VWF	von Willebrand factor	VWF_HUMAN	1	158.731	2.58731	Dengue	QC	NaN	NaN	NaN	7.02223	0.362592
Dengue / QC	_SVNDLYIQK_	P05546	0.0218723	0.0218723	0.540383	0.190821	174	P05546	SERPIND1	Heparin cofactor 2	HEP2_HUMAN	1	1.52763	1.01528	Dengue	QC	NaN	NaN	NaN	61.9229	0.0702173
Dengue / QC	_ETAVDGELVVLYDVKR_	P19823	-0.239573	0.239573	0.780945	0.253905	154	P19823	ITIH2	Inter-alpha-trypsin inhibitor heavy chain H2	ITIH2_HUMAN	1	-15.3004	0.846996	Dengue	QC	NaN	NaN	NaN	37.3407	0.154055
Dengue / QC	_GVALHRPDVYLLPPAREQLNLR_	P01871	0.159675	0.159675	0.796181	0.257437	176	P01871	IGHM	Immunoglobulin heavy constant mu	IGHM_HUMAN	1	11.7036	1.11704	Dengue	QC	NaN	NaN	NaN	77.6394	0.165888
Dengue / QC	_IDTQDIEASHYR_	P01031	-0.022462	0.022462	0.621528	0.213491	172	P01031	C5	Complement C5	CO5_HUMAN	1	-1.54489	0.984551	Dengue	QC	NaN	NaN	NaN	48.1789	0.0864916
Dengue / QC	_QGPVNLLSDPEQGVEVTGQYEREK_	Q14624	-0.0877974	0.0877974	0.714987	0.237608	172	Q14624	ITIH4	Inter-alpha-trypsin inhibitor heavy chain H4	ITIH4_HUMAN	1	-5.90418	0.940958	Dengue	QC	NaN	NaN	NaN	68.4197	0.116281
Dengue / QC	_LTISEQNIQR_	P04114	-0.0659201	0.0659201	0.480986	0.174043	150	P04114	APOB	Apolipoprotein B-100	APOB_HUMAN	1	-4.46642	0.955336	Dengue	QC	NaN	NaN	NaN	118.41	0.0597991
Dengue / QC	_C[Carbamidomethyl (C)]LHPC[Carbamidomethyl (C)]VISR_	P08603	0.0371626	0.0371626	0.686088	0.230386	164	P08603	CFH	Complement factor H	CFAH_HUMAN	1	2.60938	1.02609	Dengue	QC	NaN	NaN	NaN	64.3805	0.103112
Dengue / QC	_DGFVQDEGTMFPVGK_	P10643	-0.0115875	0.0115875	0.719028	0.23867	152	P10643	C7	Complement component C7	CO7_HUMAN	1	-0.799967	0.992	Dengue	QC	NaN	NaN	NaN	94.4402	0.11493
Dengue / QC	_ELLDTVTAPQK_	P36955	-0.0389336	0.0389336	0.543049	0.191598	144	P36955	SERPINF1	Pigment epithelium-derived factor	PEDF_HUMAN	1	-2.66259	0.973374	Dengue	QC	NaN	NaN	NaN	72.3513	0.067842
Dengue / QC	_EFQLFSSPHGKDLLFKDSAHGFLK_	P02787	-0.0751237	0.0751237	0.790464	0.256019	82	P02787	TF	Serotransferrin	TRFE_HUMAN	1	-5.07393	0.949261	Dengue	QC	NaN	NaN	NaN	40.8896	0.154717
Dengue / QC	_IRYYTYLIMNKGR_	P01024	-0.013362	0.013362	0.488482	0.176093	176	P01024	C3	Complement C3	CO3_HUMAN	1	-0.921905	0.990781	Dengue	QC	NaN	NaN	NaN	62.1906	0.0593656
Dengue / QC	_VYDYYETDEFAIAEYNAPC[Carbamidomethyl (C)]SK_	P01023	-0.0449849	0.0449849	0.685737	0.230299	176	P01023	A2M	Alpha-2-macroglobulin	A2MG_HUMAN	1	-3.07	0.9693	Dengue	QC	NaN	NaN	NaN	105.038	0.101687
Dengue / QC	_GC[Carbamidomethyl (C)]PTEEGC[Carbamidomethyl (C)]GER_	P10643	-0.0298229	0.0298229	0.728024	0.240752	168	P10643	C7	Complement component C7	CO7_HUMAN	1	-2.04595	0.979541	Dengue	QC	NaN	NaN	NaN	77.68	0.118082
Dengue / QC	_QGHNSVFLIK_	P02790	-0.0236386	0.0236386	0.519714	0.185085	176	P02790	HPX	Hemopexin	HEMO_HUMAN	1	-1.62515	0.983748	Dengue	QC	NaN	NaN	NaN	100.751	0.063758
Dengue / QC	_FLC[Carbamidomethyl (C)]TGGVSPYADPNTC[Carbamidomethyl (C)]RGDSGGPLIVHK_	B4E1Z4	-0.076338	0.076338	0.539378	0.190512	174	B4E1Z4	NaN	cDNA FLJ55673, highly similar to Complement factor B (EC 3.4.21.47)	B4E1Z4_HUMAN	1	-5.15379	0.948462	Dengue	QC	NaN	NaN	NaN	62.9361	0.0666442
Dengue / QC	_VPGLYYFTYHASSR_	D6R934;P02746	-0.0425273	0.0425273	0.644886	0.2198	172	D6R934;P02746	C1QB	Complement C1q subcomponent subunit B	D6R934_HUMAN;C1QB_HUMAN	1	-2.90475	0.970953	Dengue	QC	NaN	NaN	NaN	65.7832	0.0887004
Dengue / QC	_ALYWVNGQVPDGVSK_	P04114	-0.148697	0.148697	0.732113	0.241802	128	P04114	APOB	Apolipoprotein B-100	APOB_HUMAN	1	-9.79354	0.902065	Dengue	QC	NaN	NaN	NaN	64.755	0.118782
Dengue / QC	_EQLKAVM[Oxidation (M)]DDFAAFVEK_	P02768	0.136041	0.136041	0.888944	0.279582	176	P02768	ALB	Serum albumin	ALBU_HUMAN	1	9.88854	1.09889	Dengue	QC	NaN	NaN	NaN	90.1399	0.289506
Dengue / QC	_RNTEILTGSWSDQTYPEGTQAIYK_	P08603	0.00626229	0.00626229	0.601855	0.207934	176	P08603	CFH	Complement factor H	CFAH_HUMAN	1	0.435012	1.00435	Dengue	QC	NaN	NaN	NaN	68.5436	0.0772585
Dengue / QC	_DTEEEDFHVDQVTTVKVPMMK_	P01009	-0.00255545	0.00255545	0.809239	0.260549	170	P01009	SERPINA1	Alpha-1-antitrypsin	A1AT_HUMAN	1	-0.176973	0.99823	Dengue	QC	NaN	NaN	NaN	83.6549	0.166178
Dengue / QC	_WQEEMELYR_	P02647	-0.010238	0.010238	0.572815	0.200045	176	P02647	APOA1	Apolipoprotein A-I	APOA1_HUMAN	1	-0.707135	0.992929	Dengue	QC	NaN	NaN	NaN	141.695	0.0710205
Dengue / QC	_NSC[Carbamidomethyl (C)]PPTSELLGTSDR_	A0A087X1J7;P22352	-0.0808856	0.0808856	0.555453	0.195068	152	A0A087X1J7;P22352	GPX3	Glutathione peroxidase;Glutathione peroxidase 3	A0A087X1J7_HUMAN;GPX3_HUMAN	1	-5.45229	0.945477	Dengue	QC	NaN	NaN	NaN	85.3426	0.0676977
Dengue / QC	_ALGHLDLSGNRLR_	P02750	-0.174714	0.174714	0.824203	0.263916	84	P02750	LRG1	Leucine-rich alpha-2-glycoprotein	A2GL_HUMAN	1	-11.4057	0.885943	Dengue	QC	NaN	NaN	NaN	33.8662	0.177903
Dengue / QC	_TVGSDTFYSFKYEIK_	P01042	-0.0309304	0.0309304	0.731806	0.241715	172	P01042	KNG1	Kininogen-1	KNG1_HUMAN	1	-2.12111	0.978789	Dengue	QC	NaN	NaN	NaN	67.7346	0.115567
Dengue / QC	_QDAC[Carbamidomethyl (C)]QGDSGGVFAVR_	B4DPQ0	-0.0939472	0.0939472	0.666343	0.22529	134	B4DPQ0	C1R	Complement C1r subcomponent	B4DPQ0_HUMAN	1	-6.30442	0.936956	Dengue	QC	NaN	NaN	NaN	91.0334	0.0912412
Dengue / QC	_LSPLGEEMR_	P02647	-0.0277074	0.0277074	0.554737	0.194852	176	P02647	APOA1	Apolipoprotein A-I	APOA1_HUMAN	1	-1.9022	0.980978	Dengue	QC	NaN	NaN	NaN	82.7945	0.0645644
Dengue / QC	_SSLSVPYVIVPLKTGLQEVEVK_	P01024	0.0675916	0.0675916	0.709283	0.23609	176	P01024	C3	Complement C3	CO3_HUMAN	1	4.79657	1.04797	Dengue	QC	NaN	NaN	NaN	67.1901	0.102217
Dengue / QC	_IFFYDSENPPASEVLR_	P27169	0.0611198	0.0611198	0.657711	0.223075	176	P27169	PON1	Serum paraoxonase/arylesterase 1	PON1_HUMAN	1	4.32752	1.04328	Dengue	QC	NaN	NaN	NaN	58.3241	0.0857678
Dengue / QC	_VFAVSHGR_	P02751;P02751-15;P02751-3;P02751-7	0.150277	0.150277	0.813098	0.261401	118	P02751;P02751-15;P02751-3;P02751-7	FN1	Fibronectin;Isoform 15 of Fibronectin;Isoform 3 of Fibronectin;Isoform 7 of Fibronectin	FINC_HUMAN	1	10.9783	1.10978	Dengue	QC	NaN	NaN	NaN	61.4852	0.158377
Dengue / QC	_HYEGSTVPEK_	P00738	-0.478562	0.478562	0.8376	0.267161	172	P00738	HP	Haptoglobin	HPT_HUMAN	1	-28.2307	0.717693	Dengue	QC	NaN	NaN	NaN	49.2346	0.182424
Dengue / QC	_SVNNVVVR_	O75882;O75882-2;O75882-3	0.0531216	0.0531216	0.817479	0.262412	82	O75882;O75882-2;O75882-3	ATRN	Attractin;Isoform 2 of Attractin;Isoform 3 of Attractin	ATRN_HUMAN	1	3.75074	1.03751	Dengue	QC	NaN	NaN	NaN	23.9352	0.16
Dengue / QC	_NPDPWAK_	P02787	0.0246368	0.0246368	0.716976	0.23818	164	P02787	TF	Serotransferrin	TRFE_HUMAN	1	1.72236	1.01722	Dengue	QC	NaN	NaN	NaN	43.8733	0.102061
Dengue / QC	_DLTSLGHNENQQGSFSSQGGSSFSVPIFYSSK_	P13671	-0.138594	0.138594	0.832944	0.265985	32	P13671	C6	Complement component C6	CO6_HUMAN	1	-9.15958	0.908404	Dengue	QC	NaN	NaN	NaN	7.96458	0.168893
Dengue / QC	_YTVNQC[Carbamidomethyl (C)]R_	P00450	-0.0346093	0.0346093	0.825422	0.264192	170	P00450	CP	Ceruloplasmin	CERU_HUMAN	1	-2.37039	0.976296	Dengue	QC	NaN	NaN	NaN	40.9796	0.164446
Dengue / QC	_SKVPPPRDFHINLFR_	P06681	0.200725	0.200725	0.82186	0.263399	106	P06681	C2	Complement C2	CO2_HUMAN	1	14.9276	1.14928	Dengue	QC	NaN	NaN	NaN	56.9928	0.159629
Dengue / QC	_YLTLNTESTR_	F8WF14;P06276	-0.114474	0.114474	0.645396	0.219896	164	F8WF14;P06276	BCHE	Carboxylic ester hydrolase;Cholinesterase	F8WF14_HUMAN;CHLE_HUMAN	1	-7.62812	0.923719	Dengue	QC	NaN	NaN	NaN	75.9389	0.0771608
Dengue / QC	_VFDEFKPLVEEPQNLIK_	P02768	0.00791655	0.00791655	0.683093	0.229621	176	P02768	ALB	Serum albumin	ALBU_HUMAN	1	0.550242	1.0055	Dengue	QC	NaN	NaN	NaN	58.2	0.0861365
Dengue / QC	_RGDSPWQVVLLDSK_	E7END6;P04070;P04070-2	0.179761	0.179761	0.801792	0.2587	88	E7END6;P04070;P04070-2	PROC	Vitamin K-dependent protein C;Vitamin K-dependent protein C;Isoform 2 of Vitamin K-dependent protein C	E7END6_HUMAN;PROC_HUMAN;PROC_HUMAN	1	13.2696	1.1327	Dengue	QC	NaN	NaN	NaN	16.8811	0.13852
Dengue / QC	_FKPTLSQQQK_	Q14624	0.152171	0.152171	0.756403	0.247797	166	Q14624	ITIH4	Inter-alpha-trypsin inhibitor heavy chain H4	ITIH4_HUMAN	1	11.124	1.11124	Dengue	QC	NaN	NaN	NaN	108.094	0.112987
Dengue / QC	_DKNRWEDPGK_	P01024	0.122052	0.122052	0.746705	0.245428	128	P01024	C3	Complement C3	CO3_HUMAN	1	8.82816	1.08828	Dengue	QC	NaN	NaN	NaN	67.5896	0.107687
Dengue / QC	_PVQGVAYVR_	P0C0L5	-0.123847	0.123847	0.70476	0.23504	118	P0C0L5	C4B	Complement C4-B	CO4B_HUMAN	1	-8.22627	0.917737	Dengue	QC	NaN	NaN	NaN	98.0779	0.0918196
Dengue / QC	_LFLEPTRK_	P00747	0.0038054	0.0038054	0.693711	0.232317	168	P00747	PLG	Plasminogen	PLMN_HUMAN	1	0.264119	1.00264	Dengue	QC	NaN	NaN	NaN	57.548	0.0881461
Dengue / QC	_VTEPIS[Phospho (STY)]AESGEQVER_	O14791;O14791-2	0.0454588	0.0454588	0.700961	0.234071	146	O14791;O14791-2	APOL1	Apolipoprotein L1;Isoform 2 of Apolipoprotein L1	APOL1_HUMAN	1	3.20113	1.03201	Dengue	QC	NaN	NaN	NaN	61.9159	0.0896988
Dengue / QC	_GKEESLDSDLYAELR_	P02775	-0.0598933	0.0598933	0.583527	0.202877	176	P02775	PPBP	Platelet basic protein	CXCL7_HUMAN	1	-4.06649	0.959335	Dengue	QC	NaN	NaN	NaN	114.132	0.0628792
Dengue / QC	_EDIVM[Oxidation (M)]TQTPLSLPVTPGEPASISC[Carbamidomethyl (C)]R_	A0A087X0Q4	-0.319478	0.319478	0.748597	0.245896	42	A0A087X0Q4	IGKV2-40	Immunoglobulin kappa variable 2-40	A0A087X0Q4_HUMAN	1	-19.864	0.80136	Dengue	QC	NaN	NaN	NaN	29.4663	0.105907
Dengue / QC	_IYMTC[Carbamidomethyl (C)]PDC[Carbamidomethyl (C)]PSSIPTDSSNHQVLEAATESLAK_	Q9UGM5	-0.402339	0.402339	0.932041	0.289195	20	Q9UGM5	FETUB	Fetuin-B	FETUB_HUMAN	1	-24.3369	0.756631	Dengue	QC	NaN	NaN	NaN	2.97926	0.368272
Dengue / QC	_AFTEC[Carbamidomethyl (C)]C[Carbamidomethyl (C)]VVASQLR_	P01031	-0.0312558	0.0312558	0.665532	0.225108	176	P01031	C5	Complement C5	CO5_HUMAN	1	-2.14318	0.978568	Dengue	QC	NaN	NaN	NaN	57.6479	0.0782628
Dengue / QC	_SISC[Carbamidomethyl (C)]QEIPGQQSR_	P27918	-0.0261756	0.0261756	0.798702	0.258006	152	P27918	CFP	Properdin	PROP_HUMAN	1	-1.79799	0.98202	Dengue	QC	NaN	NaN	NaN	65.7295	0.131491
Dengue / QC	_VDTVDPPYPR_	P04004	-0.0562081	0.0562081	0.589716	0.20462	172	P04004	VTN	Vitronectin	VTNC_HUMAN	1	-3.82113	0.961789	Dengue	QC	NaN	NaN	NaN	95.9517	0.0619271
Dengue / QC	_MLEVPYVDR_	P00742	-0.0360943	0.0360943	0.60884	0.209857	158	P00742	F10	Coagulation factor X	FA10_HUMAN	1	-2.47083	0.975292	Dengue	QC	NaN	NaN	NaN	71.6094	0.0637606
Dengue / QC	_ADGSPVKAGVETTKPSK_	A0A0B4J231;B9A064	0.0493829	0.0493829	0.859845	0.272584	166	A0A0B4J231;B9A064	IGLL5	Immunoglobulin lambda-like polypeptide 5	A0A0B4J231_HUMAN;IGLL5_HUMAN	1	3.48222	1.03482	Dengue	QC	NaN	NaN	NaN	67.6856	0.182632
Dengue / QC	_TVFGTEPDMIR_	Q96KN2	-0.117423	0.117423	0.781103	0.253928	46	Q96KN2	CNDP1	Beta-Ala-His dipeptidase	CNDP1_HUMAN	1	-7.8167	0.921833	Dengue	QC	NaN	NaN	NaN	40.7669	0.115333
Dengue / QC	_QSSSYSFFK_	P04003	0.0112166	0.0112166	0.688666	0.231037	118	P04003	C4BPA	C4b-binding protein alpha chain	C4BPA_HUMAN	1	0.780503	1.00781	Dengue	QC	NaN	NaN	NaN	68.0088	0.0800081
Dengue / QC	_RYGTC[Carbamidomethyl (C)]IYQGR_	P59665;P59666	-0.115748	0.115748	0.899143	0.281883	82	P59665;P59666	DEFA1;DEFA3	Neutrophil defensin 1;Neutrophil defensin 3	DEF1_HUMAN;DEF3_HUMAN	1	-7.70966	0.922903	Dengue	QC	NaN	NaN	NaN	47.5679	0.250354
Dengue / QC	_QEDM[Oxidation (M)]KGHFSISIPVKSDIAPVAR_	P01023	0.0619664	0.0619664	0.82356	0.263762	108	P01023	A2M	Alpha-2-macroglobulin	A2MG_HUMAN	1	4.38876	1.04389	Dengue	QC	NaN	NaN	NaN	77.812	0.142026
Dengue / QC	_YISKYELDKAFSDR_	P01024	-0.00416187	0.00416187	0.724025	0.239859	150	P01024	C3	Complement C3	CO3_HUMAN	1	-0.288063	0.997119	Dengue	QC	NaN	NaN	NaN	76.3718	0.0892148
Dengue / QC	_FAC[Carbamidomethyl (C)]YYPR_	P0C0L5	-0.0284668	0.0284668	0.690663	0.231559	176	P0C0L5	C4B	Complement C4-B	CO4B_HUMAN	1	-1.95383	0.980462	Dengue	QC	NaN	NaN	NaN	76.7623	0.0783522
Dengue / QC	_VRESDEETQIK_	P04114	0.119728	0.119728	0.77238	0.251858	166	P04114	APOB	Apolipoprotein B-100	APOB_HUMAN	1	8.65298	1.08653	Dengue	QC	NaN	NaN	NaN	58.588	0.107665
Dengue / QC	_NPDGDVGGPWC[Carbamidomethyl (C)]YTTNPR_	P00747	-0.0345531	0.0345531	0.672104	0.226813	176	P00747	PLG	Plasminogen	PLMN_HUMAN	1	-2.36659	0.976334	Dengue	QC	NaN	NaN	NaN	60.1089	0.0734137
Dengue / QC	_GTEAAAVPEVELSDQPENTFLHPIIQIDR_	P05543	-0.0919907	0.0919907	0.819146	0.262772	146	P05543	SERPINA7	Thyroxine-binding globulin	THBG_HUMAN	1	-6.17727	0.938227	Dengue	QC	NaN	NaN	NaN	86.3489	0.135725
Dengue / QC	_NMEVSVATTTKAQIPILR_	P04114	0.240586	0.240586	0.928598	0.288422	26	P04114	APOB	Apolipoprotein B-100	APOB_HUMAN	1	18.1472	1.18147	Dengue	QC	NaN	NaN	NaN	4.5524	0.323128
Dengue / QC	_YYTYLIMNKGR_	P01024	-0.0146469	0.0146469	0.732933	0.242018	100	P01024	C3	Complement C3	CO3_HUMAN	1	-1.01011	0.989899	Dengue	QC	NaN	NaN	NaN	53.2535	0.0891658
Dengue / QC	_KYPVAHFIDQTLK_	P05155;P05155-3	0.0150729	0.0150729	0.773504	0.252099	170	P05155;P05155-3	SERPING1	Plasma protease C1 inhibitor;Isoform 3 of Plasma protease C1 inhibitor	IC1_HUMAN	1	1.05025	1.0105	Dengue	QC	NaN	NaN	NaN	53.7825	0.104884
Dengue / QC	_YGPPC[Carbamidomethyl (C)]PSC[Carbamidomethyl (C)]PAPEFLGGPSVFLFPPKPK_	P01861	0.0309389	0.0309389	0.847793	0.269652	176	P01861	IGHG4	Immunoglobulin heavy constant gamma 4	IGHG4_HUMAN	1	2.16768	1.02168	Dengue	QC	NaN	NaN	NaN	54.4524	0.157002
Dengue / QC	_AVSM[Oxidation (M)]PSFSILGSDVR_	P04114	-0.969055	0.969055	0.955369	0.29425	48	P04114	APOB	Apolipoprotein B-100	APOB_HUMAN	1	-48.9159	0.510841	Dengue	QC	NaN	NaN	NaN	8.21557	0.520434
Dengue / QC	_AASGTTGTYQEWK_	P04114	-0.0272214	0.0272214	0.661797	0.224081	96	P04114	APOB	Apolipoprotein B-100	APOB_HUMAN	1	-1.86915	0.981308	Dengue	QC	NaN	NaN	NaN	81.0042	0.0677583
Dengue / QC	_ANTVQEATFQM[Oxidation (M)]ELPK_	Q14624	0.0880502	0.0880502	0.754246	0.247315	144	Q14624	ITIH4	Inter-alpha-trypsin inhibitor heavy chain H4	ITIH4_HUMAN	1	6.29326	1.06293	Dengue	QC	NaN	NaN	NaN	84.2474	0.0935635
Dengue / QC	_RQEC[Carbamidomethyl (C)]SIPVC[Carbamidomethyl (C)]GQDQVTVAMTPR_	P00734	-0.0162455	0.0162455	0.819057	0.262758	176	P00734	F2	Prothrombin	THRB_HUMAN	1	-1.11974	0.988803	Dengue	QC	NaN	NaN	NaN	54.3507	0.12768
Dengue / QC	_ETYGEMADC[Carbamidomethyl (C)]C[Carbamidomethyl (C)]AKQEPER_	P02768	-0.00650453	0.00650453	0.755817	0.247654	176	P02768	ALB	Serum albumin	ALBU_HUMAN	1	-0.449845	0.995502	Dengue	QC	NaN	NaN	NaN	62.0313	0.0937643
Dengue / QC	_GLKPGVVYEGQLISIQQYGHQEVTR_	P02751;P02751-15;P02751-3;P02751-7	-0.0140358	0.0140358	0.848104	0.269677	164	P02751;P02751-15;P02751-3;P02751-7	FN1	Fibronectin;Isoform 15 of Fibronectin;Isoform 3 of Fibronectin;Isoform 7 of Fibronectin	FINC_HUMAN	1	-0.968168	0.990318	Dengue	QC	NaN	NaN	NaN	52.6258	0.148805
Dengue / QC	_WYEIEKIPTTFENGR_	P05090	0.0227203	0.0227203	0.860988	0.272872	176	P05090	APOD	Apolipoprotein D	APOD_HUMAN	1	1.58731	1.01587	Dengue	QC	NaN	NaN	NaN	58.9809	0.16238
Dengue / QC	_QVREPGQDLVVLPLSITTDFIPSFR_	P01024	-0.00129315	0.00129315	0.827349	0.264678	176	P01024	C3	Complement C3	CO3_HUMAN	1	-0.0895939	0.999104	Dengue	QC	NaN	NaN	NaN	67.7093	0.130338
Dengue / QC	_C[Carbamidomethyl (C)]LNNQQLHFLHIGSC[Carbamidomethyl (C)]QDGR_	P13671	-0.0193957	0.0193957	0.786974	0.255198	170	P13671	C6	Complement component C6	CO6_HUMAN	1	-1.33541	0.986646	Dengue	QC	NaN	NaN	NaN	61.0813	0.103801
Dengue / QC	_MATLYSR_	P41222	0.183325	0.183325	0.912449	0.284863	40	P41222	PTGDS	Prostaglandin-H2 D-isomerase	PTGDS_HUMAN	1	13.5498	1.1355	Dengue	QC	NaN	NaN	NaN	18.1853	0.252434
Dengue / QC	_QRPEVFSDNMFC[Carbamidomethyl (C)]VGDETQR_	Q9NZP8	-0.0684782	0.0684782	0.767217	0.250551	140	Q9NZP8	C1RL	Complement C1r subcomponent-like protein	C1RL_HUMAN	1	-4.63566	0.953643	Dengue	QC	NaN	NaN	NaN	38.6768	0.0941626
Dengue / QC	_V[Acetyl (Protein N-term)]NPTVFFDIAVDGEPLGR_	P62937	-0.350921	0.350921	0.902379	0.282422	62	P62937	PPIA	Peptidyl-prolyl cis-trans isomerase A	PPIA_HUMAN	1	-21.5917	0.784083	Dengue	QC	NaN	NaN	NaN	15.8991	0.221442
Dengue / QC	_HYYIGIIETTWDYASDHGEK_	P00450	-0.0410392	0.0410392	0.752357	0.246864	176	P00450	CP	Ceruloplasmin	CERU_HUMAN	1	-2.80454	0.971955	Dengue	QC	NaN	NaN	NaN	83.3139	0.0871727
Dengue / QC	_LAKTY[Phospho (STY)]ETT[Phospho (STY)]LEKC[Carbamidomethyl (C)]C[Carbamidomethyl (C)]AAADPHEC[Carbamidomethyl (C)]YAK_	P02768	1.06677	1.06677	0.95669	0.294541	142	P02768	ALB	Serum albumin	ALBU_HUMAN	1	109.473	2.09473	Dengue	QC	NaN	NaN	NaN	21.3133	0.501666
Dengue / QC	_VFDEFKPLVEEPQNLIKQNC[Carbamidomethyl (C)]ELFEQLGEYK_	P02768	0.344347	0.344347	0.889927	0.279799	176	P02768	ALB	Serum albumin	ALBU_HUMAN	1	26.9576	1.26958	Dengue	QC	NaN	NaN	NaN	40.2877	0.195625
Dengue / QC	_ALSIGFETC[Carbamidomethyl (C)]R_	H0Y2P0;H0Y5E4;H0YCV9;H0YDW7;H0YDX6;P16070;P16070-10;P16070-11;P16070-12;P16070-13;P16070-14;P16070-15;P16070-16;P16070-17;P16070-18;P16070-3;P16070-4;P16070-5;P16070-6;P16070-7;P16070-8;P16070-9	-0.106657	0.106657	0.848932	0.269851	94	H0Y2P0;H0Y5E4;H0YCV9;H0YDW7;H0YDX6;P16070;P16070-10;P16070-11;P16070-12;P16070-13;P16070-14;P16070-15;P16070-16;P16070-17;P16070-18;P16070-3;P16070-4;P16070-5;P16070-6;P16070-7;P16070-8;P16070-9	CD44	CD44 antigen (Fragment);CD44 antigen (Fragment);CD44 antigen (Fragment);CD44 antigen (Fragment);CD44 antigen (Fragment);CD44 antigen;Isoform 10 of CD44 antigen;Isoform 11 of CD44 antigen;Isoform 12 of CD44 antigen;Isoform 13 of CD44 antigen;Isoform 14 of CD44 antigen;Isoform 15 of CD44 antigen;Isoform 16 of CD44 antigen;Isoform 17 of CD44 antigen;Isoform 18 of CD44 antigen;Isoform 3 of CD44 antig…	H0Y2P0_HUMAN;H0Y5E4_HUMAN;H0YCV9_HUMAN;H0YDW7_HUMAN;H0YDX6_HUMAN;CD44_HUMAN;CD44_HUMAN;CD44_HUMAN;CD44_HUMAN;CD44_HUMAN;CD44_HUMAN;CD44_HUMAN;CD44_HUMAN;CD44_HUMAN;CD44_HUMAN;CD44_HUMAN;CD44_HUMAN;CD44_HUMAN;CD44_HUMAN;CD44_HUMAN;CD44_HUMAN;CD44_HUMAN	1	-7.12622	0.928738	Dengue	QC	NaN	NaN	NaN	19.1174	0.140139
Dengue / QC	_DYFM[Oxidation (M)]PC[Carbamidomethyl (C)]PGR_	P02790	-0.0230913	0.0230913	0.875074	0.276179	166	P02790	HPX	Hemopexin	HEMO_HUMAN	1	-1.58782	0.984122	Dengue	QC	NaN	NaN	NaN	126.531	0.169865
Dengue / QC	_SYDLDPGAGSLEI_	Q13790	0.0427661	0.0427661	0.776924	0.252949	134	Q13790	APOF	Apolipoprotein F	APOF_HUMAN	1	3.00869	1.03009	Dengue	QC	NaN	NaN	NaN	76.3287	0.0940295
Dengue / QC	_YGMWTIK_	P01031	-0.0325834	0.0325834	0.635794	0.217407	170	P01031	C5	Complement C5	CO5_HUMAN	1	-2.2332	0.977668	Dengue	QC	NaN	NaN	NaN	61.4719	0.056148
Dengue / QC	_WELC[Carbamidomethyl (C)]DIPR_	P00747	-0.0379259	0.0379259	0.755804	0.247654	176	P00747	PLG	Plasminogen	PLMN_HUMAN	1	-2.59457	0.974054	Dengue	QC	NaN	NaN	NaN	54.6542	0.0853157
Dengue / QC	_IPKPEASFSPR_	Q14624	0.0246093	0.0246093	0.90213	0.28239	158	Q14624	ITIH4	Inter-alpha-trypsin inhibitor heavy chain H4	ITIH4_HUMAN	1	1.72042	1.0172	Dengue	QC	NaN	NaN	NaN	46.8805	0.214763
Dengue / QC	_FGGTIC[Carbamidomethyl (C)]SGDIWDQASC[Carbamidomethyl (C)]SSSTTC[Carbamidomethyl (C)]VR_	P07357	0.0692015	0.0692015	0.782925	0.254362	166	P07357	C8A	Complement component C8 alpha chain	CO8A_HUMAN	1	4.91359	1.04914	Dengue	QC	NaN	NaN	NaN	70.5332	0.0949669
Dengue / QC	_ATVNPSAPR_	P08571	0.000172893	0.000172893	0.900645	0.282168	106	P08571	CD14	Monocyte differentiation antigen CD14	CD14_HUMAN	1	0.0119847	1.00012	Dengue	QC	NaN	NaN	NaN	28.3049	0.206513
Dengue / QC	_KYNSQNQSNNQFVLYR_	P01042	0.00299629	0.00299629	0.746442	0.245355	176	P01042	KNG1	Kininogen-1	KNG1_HUMAN	1	0.207903	1.00208	Dengue	QC	NaN	NaN	NaN	51.1242	0.0799116
Dengue / QC	_LC[Carbamidomethyl (C)]TVATLR_	P02768	-0.0462612	0.0462612	0.832146	0.265804	176	P02768	ALB	Serum albumin	ALBU_HUMAN	1	-3.15572	0.968443	Dengue	QC	NaN	NaN	NaN	59.0986	0.121728
Dengue / QC	_C[Carbamidomethyl (C)]GPC[Carbamidomethyl (C)]FNNGVPILEGTSC[Carbamidomethyl (C)]R_	P07357	0.0915007	0.0915007	0.815094	0.261894	136	P07357	C8A	Complement component C8 alpha chain	CO8A_HUMAN	1	6.5478	1.06548	Dengue	QC	NaN	NaN	NaN	54.4755	0.110259
Dengue / QC	_DNEQHVFK_	B4E1Z4	0.0368102	0.0368102	0.842874	0.268532	116	B4E1Z4	NaN	cDNA FLJ55673, highly similar to Complement factor B (EC 3.4.21.47)	B4E1Z4_HUMAN	1	2.58432	1.02584	Dengue	QC	NaN	NaN	NaN	41.1526	0.129441
Dengue / QC	_TEGDGVYTLNNEKQWINK_	P00738	-0.00310046	0.00310046	0.864001	0.273625	164	P00738	HP	Haptoglobin	HPT_HUMAN	1	-0.214677	0.997853	Dengue	QC	NaN	NaN	NaN	91.0709	0.145089
Dengue / QC	_AVEPQLQEEER_	P55058	0.0497468	0.0497468	0.837646	0.267161	116	P55058	PLTP	Phospholipid transfer protein	PLTP_HUMAN	1	3.50833	1.03508	Dengue	QC	NaN	NaN	NaN	36.4304	0.119056
Dengue / QC	_SYTVAIAGYALAQMGR_	P01024	0.00868725	0.00868725	0.805336	0.259525	148	P01024	C3	Complement C3	CO3_HUMAN	1	0.603971	1.00604	Dengue	QC	NaN	NaN	NaN	78.201	0.0984875
Dengue / QC	_FMETVAEK_	P10909;P10909-2;P10909-4;P10909-5	-0.0509174	0.0509174	0.779654	0.253614	174	P10909;P10909-2;P10909-4;P10909-5	CLU	Clusterin;Isoform 2 of Clusterin;Isoform 4 of Clusterin;Isoform 5 of Clusterin	CLUS_HUMAN	1	-3.46777	0.965322	Dengue	QC	NaN	NaN	NaN	68.8304	0.0865134
Dengue / QC	_VC[Carbamidomethyl (C)]NRYEFLNGR_	P00747	0.0726134	0.0726134	0.819605	0.262904	176	P00747	PLG	Plasminogen	PLMN_HUMAN	1	5.16199	1.05162	Dengue	QC	NaN	NaN	NaN	53.3475	0.105371
Dengue / QC	_EQVQSC[Carbamidomethyl (C)]GPPPELLNGNVK_	P08603	-0.00194222	0.00194222	0.661664	0.224076	176	P08603	CFH	Complement factor H	CFAH_HUMAN	1	-0.134534	0.998655	Dengue	QC	NaN	NaN	NaN	73.9373	0.0534355
Dengue / QC	_KGVC[Carbamidomethyl (C)]EETSGAYEK_	P02760	-0.232871	0.232871	0.886208	0.278888	132	P02760	AMBP	Protein AMBP	AMBP_HUMAN	1	-14.906	0.85094	Dengue	QC	NaN	NaN	NaN	93.1321	0.160884
Dengue / QC	_FDHVITNM[Oxidation (M)]NNNYEPR_	D6R934;P02746	-0.185152	0.185152	0.946694	0.292484	70	D6R934;P02746	C1QB	Complement C1q subcomponent subunit B	D6R934_HUMAN;C1QB_HUMAN	1	-12.0444	0.879556	Dengue	QC	NaN	NaN	NaN	18.0252	0.339345
Dengue / QC	_AESPEVC[Carbamidomethyl (C)]FNEESPK_	P43652	0.0390956	0.0390956	0.771628	0.251684	162	P43652	AFM	Afamin	AFAM_HUMAN	1	2.74696	1.02747	Dengue	QC	NaN	NaN	NaN	80.9458	0.0785823
Dengue / QC	_LVNEVTEFAK_	P02768	0.00883939	0.00883939	0.83224	0.265819	176	P02768	ALB	Serum albumin	ALBU_HUMAN	1	0.614581	1.00615	Dengue	QC	NaN	NaN	NaN	54.5359	0.107385
Dengue / QC	_ISVIRPSK_	B4E1Z4	0.0630705	0.0630705	0.865132	0.273854	102	B4E1Z4	NaN	cDNA FLJ55673, highly similar to Complement factor B (EC 3.4.21.47)	B4E1Z4_HUMAN	1	4.46868	1.04469	Dengue	QC	NaN	NaN	NaN	39.3351	0.133341
Dengue / QC	_EVKVEKPTADAEAYVFTPNMIC[Carbamidomethyl (C)]AGGEK_	P09871	0.012015	0.012015	0.793952	0.256904	124	P09871	C1S	Complement C1s subcomponent	C1S_HUMAN	1	0.836297	1.00836	Dengue	QC	NaN	NaN	NaN	66.8344	0.0860796
Dengue / QC	_KATEDEGSEQKIPEATNR_	P01008	0.266271	0.266271	0.908659	0.283987	136	P01008	SERPINC1	Antithrombin-III	ANT3_HUMAN	1	20.2695	1.20269	Dengue	QC	NaN	NaN	NaN	38.4847	0.195129
Dengue / QC	_RPHFFFPK_	P10909;P10909-2;P10909-4;P10909-5	-0.00193262	0.00193262	0.819021	0.262758	158	P10909;P10909-2;P10909-4;P10909-5	CLU	Clusterin;Isoform 2 of Clusterin;Isoform 4 of Clusterin;Isoform 5 of Clusterin	CLUS_HUMAN	1	-0.13387	0.998661	Dengue	QC	NaN	NaN	NaN	60.4274	0.0970702
Dengue / QC	_DAQYAPGYDKVKDISEVVTPR_	B4E1Z4	0.0626165	0.0626165	0.854946	0.271329	176	B4E1Z4	NaN	cDNA FLJ55673, highly similar to Complement factor B (EC 3.4.21.47)	B4E1Z4_HUMAN	1	4.43581	1.04436	Dengue	QC	NaN	NaN	NaN	84.1411	0.121198
Dengue / QC	_DTDTGALLFIGK_	P36955	0.0336927	0.0336927	0.818609	0.262672	172	P36955	SERPINF1	Pigment epithelium-derived factor	PEDF_HUMAN	1	2.36289	1.02363	Dengue	QC	NaN	NaN	NaN	47.9514	0.0963147
Dengue / QC	_EKLQDEDLGFL_	B4E1Z4	-0.00412071	0.00412071	0.802617	0.258857	162	B4E1Z4	NaN	cDNA FLJ55673, highly similar to Complement factor B (EC 3.4.21.47)	B4E1Z4_HUMAN	1	-0.285218	0.997148	Dengue	QC	NaN	NaN	NaN	93.2488	0.0875843
Dengue / QC	_SLGPNSC[Carbamidomethyl (C)]SANGPGLYLIHGPNLYC[Carbamidomethyl (C)]YSDVEKLNAAK_	P02790	0.00181321	0.00181321	0.906088	0.283317	176	P02790	HPX	Hemopexin	HEMO_HUMAN	1	0.125761	1.00126	Dengue	QC	NaN	NaN	NaN	46.7047	0.181136
Dengue / QC	_FFHKNEIWYR_	P00748	-0.00784643	0.00784643	0.882873	0.277991	144	P00748	F12	Coagulation factor XII	FA12_HUMAN	1	-0.542397	0.994576	Dengue	QC	NaN	NaN	NaN	48.9359	0.142656
Dengue / QC	_AGEVQEPELR_	P25311	-0.00906018	0.00906018	0.7297	0.241144	172	P25311	AZGP1	Zinc-alpha-2-glycoprotein	ZA2G_HUMAN	1	-0.626036	0.99374	Dengue	QC	NaN	NaN	NaN	84.6829	0.0606994
Dengue / QC	_WIYHLTEGSTDLR_	O95445	0.00444568	0.00444568	0.791942	0.256397	154	O95445	APOM	Apolipoprotein M	APOM_HUMAN	1	0.308626	1.00309	Dengue	QC	NaN	NaN	NaN	77.2638	0.0779409
Dengue / QC	_NVQFNYPHTSVTDVTQNNFHNYFGGSEIVVAGK_	P19823	-0.016509	0.016509	0.848536	0.269755	168	P19823	ITIH2	Inter-alpha-trypsin inhibitor heavy chain H2	ITIH2_HUMAN	1	-1.1378	0.988622	Dengue	QC	NaN	NaN	NaN	82.6968	0.106976
Dengue / QC	_EQLQDMGLVDLFSPEK_	P01008	0.244688	0.244688	0.920244	0.286543	168	P01008	SERPINC1	Antithrombin-III	ANT3_HUMAN	1	18.4836	1.18484	Dengue	QC	NaN	NaN	NaN	45.5446	0.201517
Dengue / QC	_IEGDEEMHC[Carbamidomethyl (C)]SDDGFWSK_	P08603	0.0250745	0.0250745	0.824785	0.264037	150	P08603	CFH	Complement factor H	CFAH_HUMAN	1	1.75322	1.01753	Dengue	QC	NaN	NaN	NaN	45.2375	0.0907907
Dengue / QC	_AGKEPGLQIWR_	P06396	-0.00545068	0.00545068	0.72682	0.240536	176	P06396	GSN	Gelsolin	GELS_HUMAN	1	-0.3771	0.996229	Dengue	QC	NaN	NaN	NaN	69.1698	0.0573888
Dengue / QC	_WFQQKPGQAPVLVIYK_	P01718	0.154243	0.154243	0.892278	0.28037	56	P01718	IGLV3-27	Immunoglobulin lambda variable 3-27	LV327_HUMAN	1	11.2837	1.11284	Dengue	QC	NaN	NaN	NaN	20.6421	0.146757
Dengue / QC	_EKNVPLPVIAELPPKVSVFVPPR_	P01871	0.229182	0.229182	0.898844	0.281877	80	P01871	IGHM	Immunoglobulin heavy constant mu	IGHM_HUMAN	1	17.217	1.17217	Dengue	QC	NaN	NaN	NaN	67.2407	0.155683
Dengue / QC	_C[Carbamidomethyl (C)]VPVC[Carbamidomethyl (C)]GVPR_	P09871	0.031694	0.031694	0.820073	0.26301	136	P09871	C1S	Complement C1s subcomponent	C1S_HUMAN	1	2.22117	1.02221	Dengue	QC	NaN	NaN	NaN	47.3388	0.0803028
Dengue / QC	_ESYSGVTLDPR_	P01031	-0.0199044	0.0199044	0.769902	0.251249	176	P01031	C5	Complement C5	CO5_HUMAN	1	-1.37019	0.986298	Dengue	QC	NaN	NaN	NaN	57.7129	0.0618191
Dengue / QC	_LKGPLLNKFLTTAK_	P01024	-0.0123799	0.0123799	0.829605	0.265252	152	P01024	C3	Complement C3	CO3_HUMAN	1	-0.854435	0.991456	Dengue	QC	NaN	NaN	NaN	99.6171	0.082784
Dengue / QC	_ANLQSVPHASASRPR_	O14791;O14791-2	0.121083	0.121083	0.877523	0.276717	170	O14791;O14791-2	APOL1	Apolipoprotein L1;Isoform 2 of Apolipoprotein L1	APOL1_HUMAN	1	8.75509	1.08755	Dengue	QC	NaN	NaN	NaN	111.915	0.115344
Dengue / QC	_FGLLDEDGKKTFFR_	P0C0L5	-0.0431522	0.0431522	0.774197	0.252265	176	P0C0L5	C4B	Complement C4-B	CO4B_HUMAN	1	-2.94679	0.970532	Dengue	QC	NaN	NaN	NaN	128.389	0.0612491
Dengue / QC	_HPYFYAPELLFFAKR_	P02768	0.254605	0.254605	0.901398	0.282265	176	P02768	ALB	Serum albumin	ALBU_HUMAN	1	19.3009	1.19301	Dengue	QC	NaN	NaN	NaN	39.5603	0.14112
Dengue / QC	_TAGWNIPMGLLYNKINHC[Carbamidomethyl (C)]R_	P02787	-0.0945568	0.0945568	0.793538	0.256796	176	P02787	TF	Serotransferrin	TRFE_HUMAN	1	-6.34401	0.93656	Dengue	QC	NaN	NaN	NaN	91.8366	0.0661571
Dengue / QC	_ADDKVYPGEQYTYM[Oxidation (M)]LLATEEQSPGEGDGNC[Carbamidomethyl (C)]VTR_	P00450	0.178856	0.178856	0.937189	0.290293	144	P00450	CP	Ceruloplasmin	CERU_HUMAN	1	13.1986	1.13199	Dengue	QC	NaN	NaN	NaN	59.2722	0.208259
Dengue / QC	_QVTQSYWDTNPTR_	P07996	-0.00442709	0.00442709	0.873594	0.275801	148	P07996	THBS1	Thrombospondin-1	TSP1_HUMAN	1	-0.306392	0.996936	Dengue	QC	NaN	NaN	NaN	52.2923	0.102553
Dengue / QC	_NPLVWVHASPEHVVVTR_	Q14624	-0.030228	0.030228	0.830998	0.26554	156	Q14624	ITIH4	Inter-alpha-trypsin inhibitor heavy chain H4	ITIH4_HUMAN	1	-2.07345	0.979266	Dengue	QC	NaN	NaN	NaN	149.292	0.0750577
Dengue / QC	_LAGAPSEDPQFPK_	O00391	-0.0368472	0.0368472	0.874442	0.276029	120	O00391	QSOX1	Sulfhydryl oxidase 1	QSOX1_HUMAN	1	-2.52171	0.974783	Dengue	QC	NaN	NaN	NaN	72.9801	0.100024
Dengue / QC	_TSQC[Carbamidomethyl (C)]TLKEVYGFNPEGK_	P04114	0.0453771	0.0453771	0.928	0.288345	136	P04114	APOB	Apolipoprotein B-100	APOB_HUMAN	1	3.19529	1.03195	Dengue	QC	NaN	NaN	NaN	74.0769	0.174252
Dengue / QC	_RLEKEVGTPHGIILDSVDAAFIC[Carbamidomethyl (C)]PGSSR_	P02790	0.0448422	0.0448422	0.933567	0.289541	172	P02790	HPX	Hemopexin	HEMO_HUMAN	1	3.15704	1.03157	Dengue	QC	NaN	NaN	NaN	68.1062	0.181693
Dengue / QC	_LAAAVSNFGYDLYR_	P36955	-0.0933645	0.0933645	0.88574	0.278765	176	P36955	SERPINF1	Pigment epithelium-derived factor	PEDF_HUMAN	1	-6.26657	0.937334	Dengue	QC	NaN	NaN	NaN	65.1327	0.102228
Dengue / QC	_VTEPISAESGEQVER_	O14791;O14791-2	0.00754258	0.00754258	0.889833	0.279796	176	O14791;O14791-2	APOL1	Apolipoprotein L1;Isoform 2 of Apolipoprotein L1	APOL1_HUMAN	1	0.524181	1.00524	Dengue	QC	NaN	NaN	NaN	59.1049	0.103776
Dengue / QC	_QIDDIDVR_	P04114	-0.0213508	0.0213508	0.832385	0.265851	176	P04114	APOB	Apolipoprotein B-100	APOB_HUMAN	1	-1.46903	0.98531	Dengue	QC	NaN	NaN	NaN	65.3907	0.0655619
Dengue / QC	_VLSLAQEQVGGSPEK_	P0C0L5	-0.0373025	0.0373025	0.857407	0.271976	150	P0C0L5	C4B	Complement C4-B	CO4B_HUMAN	1	-2.55247	0.974475	Dengue	QC	NaN	NaN	NaN	130.764	0.0768013
Dengue / QC	_VTLTC[Carbamidomethyl (C)]VAPLSGVDFQLRR_	P04217	0.170872	0.170872	0.888727	0.279559	174	P04217	A1BG	Alpha-1B-glycoprotein	A1BG_HUMAN	1	12.5739	1.12574	Dengue	QC	NaN	NaN	NaN	53.4614	0.0979467
Dengue / QC	_ESASLMVDR_	P06681	0.0345291	0.0345291	0.866944	0.274247	118	P06681	C2	Complement C2	CO2_HUMAN	1	2.42225	1.02422	Dengue	QC	NaN	NaN	NaN	79.3822	0.0795047
Dengue / QC	_NKANSYTTEYAASVK_	A0A0B4J1Y9	0.0720873	0.0720873	0.930054	0.288734	110	A0A0B4J1Y9	IGHV3-72	Immunoglobulin heavy variable 3-72	HV372_HUMAN	1	5.12365	1.05124	Dengue	QC	NaN	NaN	NaN	67.2345	0.151205
Dengue / QC	_MEPFHFK_	P05155;P05155-3	-0.00776544	0.00776544	0.853623	0.271004	172	P05155;P05155-3	SERPING1	Plasma protease C1 inhibitor;Isoform 3 of Plasma protease C1 inhibitor	IC1_HUMAN	1	-0.536813	0.994632	Dengue	QC	NaN	NaN	NaN	82.1052	0.0698483
Dengue / QC	_VYSLNDDLKPAKR_	P01031	0.0583023	0.0583023	0.916234	0.285685	174	P01031	C5	Complement C5	CO5_HUMAN	1	4.12397	1.04124	Dengue	QC	NaN	NaN	NaN	46.6361	0.120323
Dengue / QC	_TLEAQLTPR_	P05546	-0.0183463	0.0183463	0.835819	0.266726	176	P05546	SERPIND1	Heparin cofactor 2	HEP2_HUMAN	1	-1.26361	0.987364	Dengue	QC	NaN	NaN	NaN	64.2863	0.0597229
Dengue / QC	_EINVISNIMADFVQTR_	P11597;P11597-2	0.484412	0.484412	0.959299	0.295114	48	P11597;P11597-2	CETP	Cholesteryl ester transfer protein;Isoform 2 of Cholesteryl ester transfer protein	CETP_HUMAN	1	39.9015	1.39902	Dengue	QC	NaN	NaN	NaN	11.514	0.234478
Dengue / QC	_GWHWVGAHTLGHNSR_	Q96PD5	0.0892362	0.0892362	0.949073	0.292952	110	Q96PD5	PGLYRP2	N-acetylmuramoyl-L-alanine amidase	PGRP2_HUMAN	1	6.38069	1.06381	Dengue	QC	NaN	NaN	NaN	28.1872	0.189499
Dengue / QC	_AYKSELEEQLTPVAEETR_	P02649	-0.0617434	0.0617434	0.850185	0.27019	172	P02649	APOE	Apolipoprotein E	APOE_HUMAN	1	-4.18944	0.958106	Dengue	QC	NaN	NaN	NaN	153.408	0.063098
Dengue / QC	_TPSC[Carbamidomethyl (C)]GDIC[Carbamidomethyl (C)]NFPPK_	P04003	-0.00933016	0.00933016	0.91064	0.284486	176	P04003	C4BPA	C4b-binding protein alpha chain	C4BPA_HUMAN	1	-0.644631	0.993554	Dengue	QC	NaN	NaN	NaN	61.4226	0.105921
Dengue / QC	_FIIPSPK_	P04114	-0.0366851	0.0366851	0.84696	0.269491	156	P04114	APOB	Apolipoprotein B-100	APOB_HUMAN	1	-2.51076	0.974892	Dengue	QC	NaN	NaN	NaN	132.163	0.060932
Dengue / QC	_TLEIPGNSDPNMIPDGDFNSYVR_	P0C0L5	0.0462704	0.0462704	0.87727	0.276679	176	P0C0L5	C4B	Complement C4-B	CO4B_HUMAN	1	3.2592	1.03259	Dengue	QC	NaN	NaN	NaN	96.2618	0.0754674
Dengue / QC	_VVAQGVGIPEDSIFTM[Oxidation (M)]ADRGEC[Carbamidomethyl (C)]VPGEQEPEPILIPR_	P02760	-0.645289	0.645289	0.9735	0.298337	136	P02760	AMBP	Protein AMBP	AMBP_HUMAN	1	-36.0636	0.639364	Dengue	QC	NaN	NaN	NaN	57.4126	0.343912
Dengue / QC	_EFNAETFTFHADIC[Carbamidomethyl (C)]TLSEK_	P02768	-0.00965854	0.00965854	0.913684	0.285094	176	P02768	ALB	Serum albumin	ALBU_HUMAN	1	-0.667243	0.993328	Dengue	QC	NaN	NaN	NaN	77.0997	0.0989568
Dengue / QC	_DIPMNPMC[Carbamidomethyl (C)]IYR_	P01008	0.0231897	0.0231897	0.918082	0.286058	176	P01008	SERPINC1	Antithrombin-III	ANT3_HUMAN	1	1.62037	1.0162	Dengue	QC	NaN	NaN	NaN	65.6415	0.103781
Dengue / QC	_GFSPKDVLVR_	A0A0G2JMB2	0.0850449	0.0850449	0.933634	0.289541	176	A0A0G2JMB2	IGHA2	Immunoglobulin heavy constant alpha 2 (Fragment)	A0A0G2JMB2_HUMAN	1	6.07207	1.06072	Dengue	QC	NaN	NaN	NaN	103.432	0.128313
Dengue / QC	_LFWEPMKVHDIR_	A0A087X1J7;P22352	-0.188469	0.188469	0.898717	0.281872	60	A0A087X1J7;P22352	GPX3	Glutathione peroxidase;Glutathione peroxidase 3	A0A087X1J7_HUMAN;GPX3_HUMAN	1	-12.2463	0.877537	Dengue	QC	NaN	NaN	NaN	18.3142	0.0822073
Dengue / QC	_LQPLDFKENAEQSR_	P01008	0.0056759	0.0056759	0.867214	0.274298	176	P01008	SERPINC1	Antithrombin-III	ANT3_HUMAN	1	0.394198	1.00394	Dengue	QC	NaN	NaN	NaN	70.478	0.0598567
Dengue / QC	_WLQAQKDK_	P02750	-0.0713912	0.0713912	0.952993	0.293816	76	P02750	LRG1	Leucine-rich alpha-2-glycoprotein	A2GL_HUMAN	1	-4.82802	0.95172	Dengue	QC	NaN	NaN	NaN	25.7325	0.166176
Dengue / QC	_LKEC[Carbamidomethyl (C)]C[Carbamidomethyl (C)]EKPLLEK_	P02768	0.123824	0.123824	0.937175	0.290293	176	P02768	ALB	Serum albumin	ALBU_HUMAN	1	8.96192	1.08962	Dengue	QC	NaN	NaN	NaN	56.4522	0.121719
Dengue / QC	_DMVEYKDR_	P43652	0.0232314	0.0232314	0.920138	0.286534	158	P43652	AFM	Afamin	AFAM_HUMAN	1	1.62331	1.01623	Dengue	QC	NaN	NaN	NaN	40.1839	0.0919171
Dengue / QC	_LGNFPWQAFTSIHGR_	Q9NZP8	-0.0306335	0.0306335	0.89393	0.280752	140	Q9NZP8	C1RL	Complement C1r subcomponent-like protein	C1RL_HUMAN	1	-2.10097	0.97899	Dengue	QC	NaN	NaN	NaN	84.4713	0.0667985
Dengue / QC	_PSLSHLLSQYYGAGVARDPGFR_	Q96PD5	-0.680184	0.680184	0.985635	0.30116	44	Q96PD5	PGLYRP2	N-acetylmuramoyl-L-alanine amidase	PGRP2_HUMAN	1	-37.5914	0.624086	Dengue	QC	NaN	NaN	NaN	7.44529	0.457814
Dengue / QC	_VGAHAGEYGAEALER_	P69905	0.101871	0.101871	0.912956	0.284977	174	P69905	HBA1	Hemoglobin subunit alpha	HBA_HUMAN	1	7.31645	1.07316	Dengue	QC	NaN	NaN	NaN	140.69	0.0768282
Dengue / QC	_HYQINQQWER_	P02751;P02751-15;P02751-3;P02751-7	-0.0271688	0.0271688	0.93218	0.289223	172	P02751;P02751-15;P02751-3;P02751-7	FN1	Fibronectin;Isoform 15 of Fibronectin;Isoform 3 of Fibronectin;Isoform 7 of Fibronectin	FINC_HUMAN	1	-1.86557	0.981344	Dengue	QC	NaN	NaN	NaN	79.013	0.0976931
Dengue / QC	_DVDEC[Carbamidomethyl (C)]SLKPSIC[Carbamidomethyl (C)]GTAVC[Carbamidomethyl (C)]K_	P07225	-0.00915507	0.00915507	0.928994	0.288498	112	P07225	PROS1	Vitamin K-dependent protein S	PROS_HUMAN	1	-0.632572	0.993674	Dengue	QC	NaN	NaN	NaN	26.1329	0.092057
Dengue / QC	_RIPIEDGSGEVVLSRK_	P01024	0.0121442	0.0121442	0.944758	0.291983	176	P01024	C3	Complement C3	CO3_HUMAN	1	0.845323	1.00845	Dengue	QC	NaN	NaN	NaN	57.817	0.117993
Dengue / QC	_AVLYNYRQNQELKVR_	P01024	0.061315	0.061315	0.943162	0.291674	146	P01024	C3	Complement C3	CO3_HUMAN	1	4.34164	1.04342	Dengue	QC	NaN	NaN	NaN	43.9968	0.113929
Dengue / QC	_HGGLYHENMR_	P08603	-0.0665399	0.0665399	0.933946	0.289561	174	P08603	CFH	Complement factor H	CFAH_HUMAN	1	-4.50745	0.954926	Dengue	QC	NaN	NaN	NaN	69.7158	0.0964823
Dengue / QC	_LKYGQTIRPIC[Carbamidomethyl (C)]LPC[Carbamidomethyl (C)]TEGTTR_	B4E1Z4	0.159797	0.159797	0.941636	0.291405	172	B4E1Z4	NaN	cDNA FLJ55673, highly similar to Complement factor B (EC 3.4.21.47)	B4E1Z4_HUMAN	1	11.713	1.11713	Dengue	QC	NaN	NaN	NaN	38.5229	0.108881
Dengue / QC	_SPYQLVLQHSR_	Q15582	-0.0292453	0.0292453	0.956084	0.294407	88	Q15582	TGFBI	Transforming growth factor-beta-induced protein ig-h3	BGH3_HUMAN	1	-2.00672	0.979933	Dengue	QC	NaN	NaN	NaN	46.4871	0.144143
Dengue / QC	_SLYVSATVILHSGSDMVQAER_	P01024	-0.0421699	0.0421699	0.944277	0.291862	176	P01024	C3	Complement C3	CO3_HUMAN	1	-2.88069	0.971193	Dengue	QC	NaN	NaN	NaN	63.188	0.108013
Dengue / QC	_ELLSQGATLSGWYHLC[Carbamidomethyl (C)]LPEGR_	O75636	0.0709454	0.0709454	0.933886	0.289561	158	O75636	FCN3	Ficolin-3	FCN3_HUMAN	1	5.04048	1.0504	Dengue	QC	NaN	NaN	NaN	88.373	0.0904768
Dengue / QC	_RPC[Carbamidomethyl (C)]FESLK_	P43652	-0.00413881	0.00413881	0.966966	0.296904	104	P43652	AFM	Afamin	AFAM_HUMAN	1	-0.28647	0.997135	Dengue	QC	NaN	NaN	NaN	23.5405	0.179257
Dengue / QC	_WGYC[Carbamidomethyl (C)]LEPK_	P00748	0.00728041	0.00728041	0.93574	0.290016	174	P00748	F12	Coagulation factor XII	FA12_HUMAN	1	0.505915	1.00506	Dengue	QC	NaN	NaN	NaN	116.363	0.0841845
Dengue / QC	_VAAEDWKK_	A0A0G2JMB2	0.0731153	0.0731153	0.96698	0.296904	142	A0A0G2JMB2	IGHA2	Immunoglobulin heavy constant alpha 2 (Fragment)	A0A0G2JMB2_HUMAN	1	5.19858	1.05199	Dengue	QC	NaN	NaN	NaN	111.851	0.16318
Dengue / QC	_DHENELLNK_	B4E1Z4	0.00975971	0.00975971	0.938686	0.290679	126	B4E1Z4	NaN	cDNA FLJ55673, highly similar to Complement factor B (EC 3.4.21.47)	B4E1Z4_HUMAN	1	0.678785	1.00679	Dengue	QC	NaN	NaN	NaN	44.4815	0.0868389
Dengue / QC	_QHLGDVLNFLPL_	P06681	0.111721	0.111721	0.971729	0.297985	136	P06681	C2	Complement C2	CO2_HUMAN	1	8.05163	1.08052	Dengue	QC	NaN	NaN	NaN	50.5927	0.186891
Dengue / QC	_NFGYTLR_	P05546	-0.0343216	0.0343216	0.901955	0.282366	176	P05546	SERPIND1	Heparin cofactor 2	HEP2_HUMAN	1	-2.35092	0.976491	Dengue	QC	NaN	NaN	NaN	82.8699	0.0525055
Dengue / QC	_SLMLHYEFLQR_	P07358	-0.0240721	0.0240721	0.964071	0.296187	154	P07358	C8B	Complement component C8 beta chain	CO8B_HUMAN	1	-1.65471	0.983453	Dengue	QC	NaN	NaN	NaN	35.1428	0.136533
Dengue / QC	_TLPEC[Carbamidomethyl (C)]SKLPNNVLQEK_	P43652	0.0473668	0.0473668	0.948114	0.29275	166	P43652	AFM	Afamin	AFAM_HUMAN	1	3.33771	1.03338	Dengue	QC	NaN	NaN	NaN	76.5224	0.087961
Dengue / QC	_GGKYAATSQVLLPSK_	P01871	-0.100472	0.100472	0.976052	0.298913	96	P01871	IGHM	Immunoglobulin heavy constant mu	IGHM_HUMAN	1	-6.72721	0.932728	Dengue	QC	NaN	NaN	NaN	39.9942	0.184143
Dengue / QC	_VGDTYERPK_	P02751;P02751-15;P02751-3;P02751-7	-0.191195	0.191195	0.972111	0.298007	126	P02751;P02751-15;P02751-3;P02751-7	FN1	Fibronectin;Isoform 15 of Fibronectin;Isoform 3 of Fibronectin;Isoform 7 of Fibronectin	FINC_HUMAN	1	-12.412	0.87588	Dengue	QC	NaN	NaN	NaN	52.0011	0.156114
Dengue / QC	_RHPDYSVVLLLR_	P02768	0.0266349	0.0266349	0.944003	0.291829	176	P02768	ALB	Serum albumin	ALBU_HUMAN	1	1.86334	1.01863	Dengue	QC	NaN	NaN	NaN	92.1224	0.0766482
Dengue / QC	_TEDTAVYYC[Carbamidomethyl (C)]AR_	A0A0B4J1Y9	0.813014	0.813014	0.98542	0.301142	168	A0A0B4J1Y9	IGHV3-72	Immunoglobulin heavy variable 3-72	HV372_HUMAN	1	75.6878	1.75688	Dengue	QC	NaN	NaN	NaN	39.1989	0.241391
Dengue / QC	_DC[Carbamidomethyl (C)]KDVDEC[Carbamidomethyl (C)]SLKPSIC[Carbamidomethyl (C)]GTAVC[Carbamidomethyl (C)]K_	P07225	0.000673167	0.000673167	0.960926	0.295425	164	P07225	PROS1	Vitamin K-dependent protein S	PROS_HUMAN	1	0.0466713	1.00047	Dengue	QC	NaN	NaN	NaN	52.7253	0.0810602
Dengue / QC	_FSGSIDSSSNSASLTISGLK_	P01721	-0.134162	0.134162	0.987554	0.301599	118	P01721	IGLV6-57	Immunoglobulin lambda variable 6-57	LV657_HUMAN	1	-8.88012	0.911199	Dengue	QC	NaN	NaN	NaN	49.4417	0.236812
Dengue / QC	_M[Oxidation (M)]ADEAGSEADHEGTHSTKR_	P02671	1.07082	1.07082	0.997489	0.303817	106	P02671	FGA	Fibrinogen alpha chain	FIBA_HUMAN	1	110.063	2.10063	Dengue	QC	NaN	NaN	NaN	17.1442	0.811216
Dengue / QC	_FLDSNIK_	P04114	0.0151372	0.0151372	0.978566	0.299508	152	P04114	APOB	Apolipoprotein B-100	APOB_HUMAN	1	1.05476	1.01055	Dengue	QC	NaN	NaN	NaN	71.8736	0.0898265
Dengue / QC	_VEYHFLSPYVSPK_	G3V0E5;P02786	0.0352102	0.0352102	0.987027	0.301479	60	G3V0E5;P02786	TFRC	Transferrin receptor (P90, CD71), isoform CRA_c;Transferrin receptor protein 1	G3V0E5_HUMAN;TFR1_HUMAN	1	2.47061	1.02471	Dengue	QC	NaN	NaN	NaN	48.5951	0.146292
Dengue / QC	_IEIPLPFGGK_	P04114	-0.00128892	0.00128892	0.980398	0.299957	164	P04114	APOB	Apolipoprotein B-100	APOB_HUMAN	1	-0.089301	0.999107	Dengue	QC	NaN	NaN	NaN	89.16	0.0841614
Dengue / QC	_VANPC[Carbamidomethyl (C)]VK_	P01008	0.0449377	0.0449377	0.988808	0.301858	160	P01008	SERPINC1	Antithrombin-III	ANT3_HUMAN	1	3.16386	1.03164	Dengue	QC	NaN	NaN	NaN	61.3425	0.139904
Dengue / QC	_C[Carbamidomethyl (C)]EWETPEGC[Carbamidomethyl (C)]EQVLTGKR_	P04003	0.0370155	0.0370155	0.987768	0.301636	168	P04003	C4BPA	C4b-binding protein alpha chain	C4BPA_HUMAN	1	2.59892	1.02599	Dengue	QC	NaN	NaN	NaN	44.0123	0.1075
Dengue / QC	_NTLYLQMNSLRAEDTAVYYC[Carbamidomethyl (C)]AR_	A0A0J9YVT0;P0DP02	0.54511	0.54511	0.993402	0.30286	114	A0A0J9YVT0;P0DP02	IGHV3-33;IGHV3-30-3	Immunoglobulin heavy variable 3-33 (Fragment);Immunoglobulin heavy variable 3-30-3	A0A0J9YVT0_HUMAN;HVC33_HUMAN	1	45.9132	1.45913	Dengue	QC	NaN	NaN	NaN	32.8207	0.193865
Dengue / QC	_KGEWVALNPLR_	P08603	-0.0256818	0.0256818	0.981093	0.300122	176	P08603	CFH	Complement factor H	CFAH_HUMAN	1	-1.76437	0.982356	Dengue	QC	NaN	NaN	NaN	78.0624	0.0597341
Dengue / QC	_ELQAAQAR_	P02649	0.394002	0.394002	0.99259	0.302691	138	P02649	APOE	Apolipoprotein E	APOE_HUMAN	1	31.4033	1.31403	Dengue	QC	NaN	NaN	NaN	55.9501	0.122136
Dengue / QC	_NVHWYQQKPGQAPVLVIYR_	A0A075B6K5	-0.0238392	0.0238392	0.993508	0.302876	128	A0A075B6K5	IGLV3-9	Immunoglobulin lambda variable 3-9	LV39_HUMAN	1	-1.63883	0.983612	Dengue	QC	NaN	NaN	NaN	59.4515	0.106929
Dengue / QC	_HTASAWLMSAPNSGPHNR_	Q96PD5	0.0305234	0.0305234	0.993218	0.302836	148	Q96PD5	PGLYRP2	N-acetylmuramoyl-L-alanine amidase	PGRP2_HUMAN	1	2.13826	1.02138	Dengue	QC	NaN	NaN	NaN	100.037	0.0726316
Dengue / QC	_AVGNLRKC[Carbamidomethyl (C)]STSSLLEAC[Carbamidomethyl (C)]TFR_	P02787	-0.0829021	0.0829021	0.999237	0.304235	116	P02787	TF	Serotransferrin	TRFE_HUMAN	1	-5.58435	0.944157	Dengue	QC	NaN	NaN	NaN	15.3454	0.455697
Dengue / QC	_GQWGTVC[Carbamidomethyl (C)]DDGWDIKDVAVLC[Carbamidomethyl (C)]R_	O43866	-0.00196443	0.00196443	0.9976	0.303835	154	O43866	CD5L	CD5 antigen-like	CD5L_HUMAN	1	-0.136071	0.998639	Dengue	QC	NaN	NaN	NaN	111.388	0.0892878
Dengue / QC	_LEQGENVFLQATDK_	D6R934;P02746	-0.0349922	0.0349922	0.998161	0.303974	156	D6R934;P02746	C1QB	Complement C1q subcomponent subunit B	D6R934_HUMAN;C1QB_HUMAN	1	-2.3963	0.976037	Dengue	QC	NaN	NaN	NaN	106.268	0.0784342
Dengue / QC	_SC[Carbamidomethyl (C)]DKTHTC[Carbamidomethyl (C)]PPC[Carbamidomethyl (C)]PAPELLGGPSVFLFPPK_	P01857	0.104044	0.104044	0.999284	0.304235	138	P01857	IGHG1	Immunoglobulin heavy constant gamma 1	IGHG1_HUMAN	1	7.4782	1.07478	Dengue	QC	NaN	NaN	NaN	86.6981	0.139827
Dengue / QC	_NVVFVIDKSGSMSGR_	Q14624	0.0523561	0.0523561	0.996524	0.303603	168	Q14624	ITIH4	Inter-alpha-trypsin inhibitor heavy chain H4	ITIH4_HUMAN	1	3.6957	1.03696	Dengue	QC	NaN	NaN	NaN	136.481	0.0955615
Dengue / QC	_AYLEEEC[Carbamidomethyl (C)]PATLRK_	P25311	0.0307242	0.0307242	0.996514	0.303603	170	P25311	AZGP1	Zinc-alpha-2-glycoprotein	ZA2G_HUMAN	1	2.15248	1.02152	Dengue	QC	NaN	NaN	NaN	47.7774	0.140445
Dengue / QC	_AQGFTEDTIVFLPQTDK_	P41222	0.0243636	0.0243636	0.996606	0.303612	98	P41222	PTGDS	Prostaglandin-H2 D-isomerase	PTGDS_HUMAN	1	1.7031	1.01703	Dengue	QC	NaN	NaN	NaN	82.3215	0.188163
Dengue / QC	_GGYTLVSGYPK_	P02790	0.00385127	0.00385127	0.990342	0.302208	172	P02790	HPX	Hemopexin	HEMO_HUMAN	1	0.267306	1.00267	Dengue	QC	NaN	NaN	NaN	142.519	0.0713843
Dengue / QC	_GDKVWVYPPEKK_	P02790	0.00576856	0.00576856	0.985885	0.301205	176	P02790	HPX	Hemopexin	HEMO_HUMAN	1	0.400646	1.00401	Dengue	QC	NaN	NaN	NaN	64.8284	0.0865829
Dengue / QC	_QLGAGSIEEC[Carbamidomethyl (C)]AAK_	P00747	0.0127604	0.0127604	0.98152	0.300237	176	P00747	PLG	Plasminogen	PLMN_HUMAN	1	0.88841	1.00888	Dengue	QC	NaN	NaN	NaN	55.2839	0.0799377
Dengue / QC	_KIEEIAAK_	P01031	-0.0754341	0.0754341	0.990449	0.302215	52	P01031	C5	Complement C5	CO5_HUMAN	1	-5.09435	0.949056	Dengue	QC	NaN	NaN	NaN	11.4206	0.157659
Dengue / QC	_SLPAPWLSMAPVSWITPGLK_	P04217	-0.036693	0.036693	0.977008	0.299142	166	P04217	A1BG	Alpha-1B-glycoprotein	A1BG_HUMAN	1	-2.51129	0.974887	Dengue	QC	NaN	NaN	NaN	124.547	0.0803309
Dengue / QC	_WSGQTAIC[Carbamidomethyl (C)]DNGAGYC[Carbamidomethyl (C)]SNPGIPIGTRK_	B4E1Z4	0.0734068	0.0734068	0.984309	0.300867	172	B4E1Z4	NaN	cDNA FLJ55673, highly similar to Complement factor B (EC 3.4.21.47)	B4E1Z4_HUMAN	1	5.21984	1.0522	Dengue	QC	NaN	NaN	NaN	69.7028	0.12092
Dengue / QC	_GSGVPDR_	A0A075B6I1	-0.0731232	0.0731232	0.992375	0.302643	86	A0A075B6I1	IGLV4-60	Immunoglobulin lambda variable 4-60	LV460_HUMAN	1	-4.94221	0.950578	Dengue	QC	NaN	NaN	NaN	57.5723	0.269802
Dengue / QC	_NSEEFAAAMSR_	P04114	0.0244477	0.0244477	0.9673	0.296973	176	P04114	APOB	Apolipoprotein B-100	APOB_HUMAN	1	1.70903	1.01709	Dengue	QC	NaN	NaN	NaN	68.5464	0.0643762
Dengue / QC	_TRIQDLNR_	P10124	-0.268502	0.268502	0.996017	0.303481	8	P10124	SRGN	Serglycin	SRGN_HUMAN	1	-16.9819	0.830181	Dengue	QC	NaN	NaN	NaN	2.5201	0.555158
Dengue / QC	_FWKDNLQHKDSSVPNTGTAR_	P01031	-0.0666245	0.0666245	0.978413	0.299493	98	P01031	C5	Complement C5	CO5_HUMAN	1	-4.51305	0.954869	Dengue	QC	NaN	NaN	NaN	68.4418	0.136736
Dengue / QC	_FVFGTTPEDILR_	P07996	0.0100792	0.0100792	0.960603	0.295342	134	P07996	THBS1	Thrombospondin-1	TSP1_HUMAN	1	0.701081	1.00701	Dengue	QC	NaN	NaN	NaN	104.442	0.0780857
Dengue / QC	_ASQGISSALAWYQQKPGKAPK_	A0A0B4J2D9;P0DP09	-0.071788	0.071788	0.987968	0.301665	66	A0A0B4J2D9;P0DP09	IGKV1D-13;IGKV1-13	Immunoglobulin kappa variable 1D-13;Immunoglobulin kappa variable 1-13	KVD13_HUMAN;KV113_HUMAN	1	-4.85419	0.951458	Dengue	QC	NaN	NaN	NaN	31.5617	0.264217
Dengue / QC	_SVPMVPPGIK_	P51884	0.0112363	0.0112363	0.954421	0.294068	176	P51884	LUM	Lumican	LUM_HUMAN	1	0.781881	1.00782	Dengue	QC	NaN	NaN	NaN	70.975	0.0702972
Dengue / QC	_SSALDM[Oxidation (M)]ENFR_	P19823	-0.00855051	0.00855051	0.96513	0.296418	154	P19823	ITIH2	Inter-alpha-trypsin inhibitor heavy chain H2	ITIH2_HUMAN	1	-0.590923	0.994091	Dengue	QC	NaN	NaN	NaN	50.3445	0.0969287
Dengue / QC	_FSGVPDR_	A0A0C4DH68	0.0501937	0.0501937	0.960409	0.295306	168	A0A0C4DH68	IGKV2-24	Immunoglobulin kappa variable 2-24	KV224_HUMAN	1	3.54039	1.0354	Dengue	QC	NaN	NaN	NaN	134.36	0.0892189
Dengue / QC	_TFHEASEDC[Carbamidomethyl (C)]ISR_	E9PHK0;P05452	0.0616859	0.0616859	0.963781	0.296161	154	E9PHK0;P05452	CLEC3B	Tetranectin	E9PHK0_HUMAN;TETN_HUMAN	1	4.36846	1.04368	Dengue	QC	NaN	NaN	NaN	60.6343	0.0997579
Dengue / QC	_KGTDYHKQPWQAK_	B4E1Z4	0.0421858	0.0421858	0.975213	0.298735	136	B4E1Z4	NaN	cDNA FLJ55673, highly similar to Complement factor B (EC 3.4.21.47)	B4E1Z4_HUMAN	1	2.96727	1.02967	Dengue	QC	NaN	NaN	NaN	60.6942	0.145975
[truncated: 17,011 more rows]
