# Supplementary material for: Re-mining serum proteomics data reveals extensive post-translational modifications upon Zika and dengue infection
Source: Royal Society of Chemistry journal article supplement (doi:10.1039/d2mo00258b), 2023-02-15
Supplement: d2mo00258b8.xlsx [file d2mo00258b8.xlsx]

## Sheet: 200704_Zika_DIA_PTM_Sulf_HTRMS_
Comparison (group1/group2)	Group	ProteinGroups	AVG Log2 Ratio	Absolute AVG Log2 Ratio	Pvalue	Qvalue	# of Ratios	UniProtIds	Genes	ProteinDescriptions	ProteinNames	# Unique Total Peptides	% Change	Ratio	Condition Numerator	Condition Denominator	GO Cellular Component	GO Molecular Function	GO Biological Process	Degrees Of Freedom	Standard Error
Dengue / QC	_VEKFDLVPVPTNLYGDFFTGDAYVILK_	P06396	1.66307	1.66307	4.79744e-48	2.72687e-44	160	P06396	GSN	Gelsolin	GELS_HUMAN	1	216.689	3.16689	Dengue	QC	NaN	NaN	NaN	141.109	0.0713055
Dengue / QC	_DVDKEFYLFPTVFDENESLLLEDNIR_	P00450	1.66141	1.66141	1.82656e-46	5.19109e-43	168	P00450	CP	Ceruloplasmin	CERU_HUMAN	1	216.325	3.16325	Dengue	QC	NaN	NaN	NaN	163.872	0.081033
Dengue / QC	_YSQPEDSLIPFFEITVPESQLTVSQFTLPK_	P04114	1.20512	1.20512	2.94263e-38	3.34519e-35	170	P04114	APOB	Apolipoprotein B-100	APOB_HUMAN	1	130.557	2.30557	Dengue	QC	NaN	NaN	NaN	114.18	0.0626461
Dengue / QC	_FFESFGDLSTPDAVM[Oxidation (M)]GNPK_	P68871	0.784293	0.784293	1.10151e-37	1.0435e-34	94	P68871	HBB	Hemoglobin subunit beta	HBB_HUMAN	1	72.2248	1.72225	Dengue	QC	NaN	NaN	NaN	88.508	0.0381997
Dengue / QC	_YDPSLKPLSVSYDQATSLR_	P00918	1.54403	1.54403	4.54389e-36	2.15229e-33	82	P00918	CA2	Carbonic anhydrase 2	CAH2_HUMAN	1	191.609	2.91609	Dengue	QC	NaN	NaN	NaN	65.1649	0.0562199
Dengue / QC	_TIDQMLNSELQWPVPDIYLR_	P04114	1.12783	1.12783	1.70779e-33	5.71005e-31	106	P04114	APOB	Apolipoprotein B-100	APOB_HUMAN	1	118.53	2.1853	Dengue	QC	NaN	NaN	NaN	92.0217	0.0660732
Dengue / QC	_TLADLTLLDSPIKVPLLLSEPINIIDALEMR_	P04114	2.08733	2.08733	3.86385e-33	1.22012e-30	140	P04114	APOB	Apolipoprotein B-100	APOB_HUMAN	1	324.96	4.2496	Dengue	QC	NaN	NaN	NaN	110.511	0.13613
Dengue / QC	_TAMDVFVC[Carbamidomethyl (C)]TYFMPAAQLPELPDVELPTNKDVC[Carbamidomethyl (C)]DPGNTK_	P02774;P02774-3	1.15715	1.15715	1.16185e-32	3.47578e-30	170	P02774;P02774-3	GC	Vitamin D-binding protein;Isoform 3 of Vitamin D-binding protein	VTDB_HUMAN	1	123.017	2.23017	Dengue	QC	NaN	NaN	NaN	143.541	0.0775616
Dengue / QC	_LTVDKSRWQEGNVFSC[Carbamidomethyl (C)]SVMHEALHNHYTQK_	P01861	0.52741	0.52741	1.9018e-32	5.40493e-30	94	P01861	IGHG4	Immunoglobulin heavy constant gamma 4	IGHG4_HUMAN	1	44.134	1.44134	Dengue	QC	NaN	NaN	NaN	51.5502	0.355847
Dengue / QC	_SGAGTEDSAC[Carbamidomethyl (C)]IPWAYYSTVDQVKDLYSGLIGPLIVC[Carbamidomethyl (C)]R_	P00450	1.59995	1.59995	2.61934e-32	6.47319e-30	166	P00450	CP	Ceruloplasmin	CERU_HUMAN	1	203.133	3.03133	Dengue	QC	NaN	NaN	NaN	152.476	0.107864
Dengue / QC	_QGQIIYNWQGAQSTQDEVAASAILTAQLDEELGGTPVQSR_	P06396	1.2253	1.2253	4.44397e-32	1.03435e-29	134	P06396	GSN	Gelsolin	GELS_HUMAN	1	133.805	2.33805	Dengue	QC	NaN	NaN	NaN	108.919	0.0762706
Dengue / QC	_IHEDSDSALQLQDFYQEVANPLLTAVTFEYPSNAVEEVTQNNFR_	Q14624	1.50832	1.50832	5.85448e-32	1.27988e-29	156	Q14624	ITIH4	Inter-alpha-trypsin inhibitor heavy chain H4	ITIH4_HUMAN	1	184.478	2.84478	Dengue	QC	NaN	NaN	NaN	132.131	0.0920746
Dengue / QC	_LYLKHQMDLVATLSQLGLQELFQAPDLR_	P08697	1.60116	1.60116	3.75384e-31	6.27554e-29	158	P08697	SERPINF2	Alpha-2-antiplasmin	A2AP_HUMAN	1	203.387	3.03387	Dengue	QC	NaN	NaN	NaN	150.077	0.10273
Dengue / QC	_ESATITC[Carbamidomethyl (C)]LVTGFSPADVFVQWMQR_	P01871	1.22372	1.22372	4.58179e-31	7.44083e-29	172	P01871	IGHM	Immunoglobulin heavy constant mu	IGHM_HUMAN	1	133.549	2.33549	Dengue	QC	NaN	NaN	NaN	147.322	0.0843057
Dengue / QC	_VETNM[Oxidation (M)]AFSPFSIASLLTQVLLGAGENTK_	P05155;P05155-3	0.146451	0.146451	9.79983e-31	1.46585e-28	70	P05155;P05155-3	SERPING1	Plasma protease C1 inhibitor;Isoform 3 of Plasma protease C1 inhibitor	IC1_HUMAN	1	10.6843	1.10684	Dengue	QC	NaN	NaN	NaN	40.5539	0.203522
Dengue / QC	_DVFLGMFLYEYAR_	P02768	1.03714	1.03714	1.58577e-30	2.25338e-28	176	P02768	ALB	Serum albumin	ALBU_HUMAN	1	105.216	2.05216	Dengue	QC	NaN	NaN	NaN	171.434	0.0753427
Dengue / QC	_VFPLSLC[Carbamidomethyl (C)]STQPDGNVVIAC[Carbamidomethyl (C)]LVQGFFPQEPLSVTWSESGQGVTAR_	P01876	1.94444	1.94444	1.79739e-30	2.4918e-28	164	P01876	IGHA1	Immunoglobulin heavy constant alpha 1	IGHA1_HUMAN	1	284.887	3.84887	Dengue	QC	NaN	NaN	NaN	154.682	0.141439
Dengue / QC	_TAGPDQTEMTIEGLQPTVEYVVSVYAQNPSGESQPLVQTAVTTIPAPTDLK_	P02751-14;P02751-8	1.46309	1.46309	3.04058e-30	4.01923e-28	162	P02751-14;P02751-8	FN1	Isoform 14 of Fibronectin;Isoform 8 of Fibronectin	FINC_HUMAN	1	175.699	2.75699	Dengue	QC	NaN	NaN	NaN	154.914	0.0945702
Dengue / QC	_TGC[Carbamidomethyl (C)]SLMGASVDSTLAFNTYVHFQGK_	P01019	0.0277152	0.0277152	1.63762e-28	1.6924e-26	38	P01019	AGT	Angiotensinogen	ANGT_HUMAN	1	1.93964	1.0194	Dengue	QC	NaN	NaN	NaN	32.8207	0.216361
Dengue / QC	_TAMDVFVC[Carbamidomethyl (C)]TYFMPAAQLPELPDVELPTNK_	P02774;P02774-3	1.28898	1.28898	1.63739e-28	1.6924e-26	138	P02774;P02774-3	GC	Vitamin D-binding protein;Isoform 3 of Vitamin D-binding protein	VTDB_HUMAN	1	144.355	2.44355	Dengue	QC	NaN	NaN	NaN	104.068	0.0839061
Dengue / QC	_VLGAFSDGLAHLDNLK_	P68871	1.76834	1.76834	1.95623e-28	1.95074e-26	46	P68871	HBB	Hemoglobin subunit beta	HBB_HUMAN	1	240.662	3.40662	Dengue	QC	NaN	NaN	NaN	34.5687	0.0504983
Dengue / QC	_GGPLDGTYR_	P00918	1.23865	1.23865	2.74463e-28	2.68974e-26	60	P00918	CA2	Carbonic anhydrase 2	CAH2_HUMAN	1	135.977	2.35977	Dengue	QC	NaN	NaN	NaN	46.9125	0.0564956
Dengue / QC	_LYLKHQM[Oxidation (M)]DLVATLSQLGLQELFQAPDLR_	P08697	0.911666	0.911666	3.3186e-28	3.1971e-26	112	P08697	SERPINF2	Alpha-2-antiplasmin	A2AP_HUMAN	1	88.1217	1.88122	Dengue	QC	NaN	NaN	NaN	92.177	0.119891
Dengue / QC	_REDFDVEAADSAGNC[Carbamidomethyl (C)]LDSLVFVAGDR_	P09871	1.44538	1.44538	4.80767e-28	4.47981e-26	104	P09871	C1S	Complement C1s subcomponent	C1S_HUMAN	1	172.335	2.72335	Dengue	QC	NaN	NaN	NaN	93.7453	0.096597
Dengue / QC	_YGGGFYSTQDTINAIEGLTEYSLLVK_	P01031	0.925033	0.925033	5.65228e-28	5.18187e-26	146	P01031	C5	Complement C5	CO5_HUMAN	1	89.8728	1.89873	Dengue	QC	NaN	NaN	NaN	128.033	0.0676912
Dengue / QC	_DLEVVAATPTSLLISWDAPAVTVR_	P02751;P02751-15;P02751-3;P02751-7	1.33363	1.33363	1.04408e-27	9.13007e-26	166	P02751;P02751-15;P02751-3;P02751-7	FN1	Fibronectin;Isoform 15 of Fibronectin;Isoform 3 of Fibronectin;Isoform 7 of Fibronectin	FINC_HUMAN	1	152.037	2.52037	Dengue	QC	NaN	NaN	NaN	160.794	0.100718
Dengue / QC	_MDWLVPATC[Carbamidomethyl (C)]EPIQSVFFFSGDK_	P04004	1.3219	1.3219	3.3971e-27	2.7196e-25	106	P04004	VTN	Vitronectin	VTNC_HUMAN	1	149.994	2.49994	Dengue	QC	NaN	NaN	NaN	100.675	0.0895602
Dengue / QC	_KDDIMLDEGMLQSLMELPDQYNYGMYAK_	P07357	1.05184	1.05184	6.39902e-27	5.05167e-25	94	P07357	C8A	Complement component C8 alpha chain	CO8A_HUMAN	1	107.317	2.07317	Dengue	QC	NaN	NaN	NaN	75.1796	0.0672041
Dengue / QC	_LRLEPGKEYLIM[Oxidation (M)]GLDGATYDLEGHPQYLLDSNSWIEEMPSER_	P0C0L5	0.734616	0.734616	8.40974e-27	6.45959e-25	114	P0C0L5	C4B	Complement C4-B	CO4B_HUMAN	1	66.3954	1.66395	Dengue	QC	NaN	NaN	NaN	88.0845	0.161751
Dengue / QC	_SWVPHTFESELSDPVELLVAES_	P04217	0.800804	0.800804	1.73998e-26	1.19157e-24	176	P04217	A1BG	Alpha-1B-glycoprotein	A1BG_HUMAN	1	74.2071	1.74207	Dengue	QC	NaN	NaN	NaN	138.401	0.067397
Dengue / QC	_EVYMPSSIFQDDFVIPDISEPGTWK_	P0C0L5	0.931008	0.931008	4.00573e-26	2.55826e-24	174	P0C0L5	C4B	Complement C4-B	CO4B_HUMAN	1	90.6607	1.90661	Dengue	QC	NaN	NaN	NaN	131.526	0.0732025
Dengue / QC	_DC[Carbamidomethyl (C)]QDIANK_	P02679	6.35799	6.35799	1.14637e-25	6.71749e-24	44	P02679	FGG	Fibrinogen gamma chain	FIBG_HUMAN	1	8102.49	82.0249	Dengue	QC	NaN	NaN	NaN	36.5038	0.201856
Dengue / QC	_ADSQAQLLLSTVVGVFTAPGLHLKQPFVQGLALYTPVVLPR_	P01019	0.884203	0.884203	1.1966e-25	6.94029e-24	158	P01019	AGT	Angiotensinogen	ANGT_HUMAN	1	84.5744	1.84574	Dengue	QC	NaN	NaN	NaN	144.427	0.07684
Dengue / QC	_YRGDQDATMSILDISMMTGFAPDTDDLK_	P01024	1.12304	1.12304	1.84284e-25	1.0371e-23	144	P01024	C3	Complement C3	CO3_HUMAN	1	117.805	2.17805	Dengue	QC	NaN	NaN	NaN	131.632	0.0883251
Dengue / QC	_VPTADLEDVLPLAEDITNILSK_	P02774;P02774-3	0.979407	0.979407	2.04896e-25	1.1307e-23	176	P02774;P02774-3	GC	Vitamin D-binding protein;Isoform 3 of Vitamin D-binding protein	VTDB_HUMAN	1	97.1654	1.97165	Dengue	QC	NaN	NaN	NaN	171.188	0.0847713
Dengue / QC	_LHLETDSLALVALGALDTALYAAGSK_	P0C0L5	1.00436	1.00436	2.53302e-25	1.35827e-23	174	P0C0L5	C4B	Complement C4-B	CO4B_HUMAN	1	100.605	2.00605	Dengue	QC	NaN	NaN	NaN	161.557	0.0877829
Dengue / QC	_KAGTELVNFLSYFVELGTQPATQ_	P02652;V9GYM3	1.09885	1.09885	4.18856e-25	2.16434e-23	120	P02652;V9GYM3	APOA2	Apolipoprotein A-II	APOA2_HUMAN;V9GYM3_HUMAN	1	114.184	2.14184	Dengue	QC	NaN	NaN	NaN	85.8225	0.0898477
Dengue / QC	_VQLSNDFDEYIMAIEQTIK_	P01024	0.809705	0.809705	6.04151e-25	3.01228e-23	176	P01024	C3	Complement C3	CO3_HUMAN	1	75.2853	1.75285	Dengue	QC	NaN	NaN	NaN	114.476	0.0623049
Dengue / QC	_AAPSVTLFPPSSEELQANKATLVC[Carbamidomethyl (C)]LISDFYPGAVTVAWK_	P0DOY2	1.772	1.772	9.54229e-25	4.55785e-23	168	P0DOY2	IGLC2	Immunoglobulin lambda constant 2	IGLC2_HUMAN	1	241.527	3.41527	Dengue	QC	NaN	NaN	NaN	145.937	0.149088
Dengue / QC	_LSLESLTSYFSIESSTKGDVK_	P04114	0.763529	0.763529	2.14636e-24	9.91864e-23	146	P04114	APOB	Apolipoprotein B-100	APOB_HUMAN	1	69.7638	1.69764	Dengue	QC	NaN	NaN	NaN	140.095	0.0736602
Dengue / QC	_LVYHLGLPFSFLTFPYVEEAIK_	A0A182DWH7;P49908	1.15003	1.15003	2.78401e-24	1.26594e-22	86	A0A182DWH7;P49908	SELENOP	Selenoprotein P (Fragment);Selenoprotein P	A0A182DWH7_HUMAN;SEPP1_HUMAN	1	121.918	2.21918	Dengue	QC	NaN	NaN	NaN	73.2142	0.0839346
Dengue / QC	_ANPTVTLFPPSSEELQANKATLVC[Carbamidomethyl (C)]LISDFYPGAVTVAWK_	A0A0B4J231;B9A064	1.61408	1.61408	4.38995e-24	1.92966e-22	166	A0A0B4J231;B9A064	IGLL5	Immunoglobulin lambda-like polypeptide 5	A0A0B4J231_HUMAN;IGLL5_HUMAN	1	206.117	3.06117	Dengue	QC	NaN	NaN	NaN	156.597	0.133413
Dengue / QC	_PSETTLC[Carbamidomethyl (C)]QVAGWGHQFEGAEEYASFLQEAQVPFLSLER_	P00748	1.79145	1.79145	6.64316e-24	2.83908e-22	86	P00748	F12	Coagulation factor XII	FA12_HUMAN	1	246.163	3.46163	Dengue	QC	NaN	NaN	NaN	55.7738	0.0972092
Dengue / QC	_GTELQHLLHAVVPGPWQEDVADAEEC[Carbamidomethyl (C)]AGR_	G3XAK1;P26927	1.25287	1.25287	7.08122e-24	3.0037e-22	116	G3XAK1;P26927	MST1	Hepatocyte growth factor-like protein	G3XAK1_HUMAN;HGFL_HUMAN	1	138.315	2.38315	Dengue	QC	NaN	NaN	NaN	106.007	0.109543
Dengue / QC	_SELTQQLNALFQDK_	P06727	1.13398	1.13398	1.72844e-23	6.9677e-22	60	P06727	APOA4	Apolipoprotein A-IV	APOA4_HUMAN	1	119.463	2.19463	Dengue	QC	NaN	NaN	NaN	53.5385	0.101184
Dengue / QC	_KEGGLGPLNIPLLADVTR_	P32119	1.28691	1.28691	1.81815e-23	7.27771e-22	72	P32119	PRDX2	Peroxiredoxin-2	PRDX2_HUMAN	1	144.005	2.44005	Dengue	QC	NaN	NaN	NaN	60.9784	0.0814917
Dengue / QC	_EPGQDLVVLPLSITTDFIPSFR_	P01024	0.925322	0.925322	3.92644e-23	1.53916e-21	176	P01024	C3	Complement C3	CO3_HUMAN	1	89.9108	1.89911	Dengue	QC	NaN	NaN	NaN	135.755	0.0773031
Dengue / QC	_LTVDKSRWQQGNVFSC[Carbamidomethyl (C)]SVM[Oxidation (M)]HEALHNHYTQK_	P01857	1.32337	1.32337	5.38943e-23	2.02871e-21	88	P01857	IGHG1	Immunoglobulin heavy constant gamma 1	IGHG1_HUMAN	1	150.249	2.50249	Dengue	QC	NaN	NaN	NaN	53.4653	0.536725
Dengue / QC	_DGWHSWPIAHQWPQGPSAVDAAFSWEEK_	P02790	1.11955	1.11955	7.02477e-23	2.6269e-21	148	P02790	HPX	Hemopexin	HEMO_HUMAN	1	117.28	2.1728	Dengue	QC	NaN	NaN	NaN	127.965	0.0921927
Dengue / QC	_HQMDLVATLSQLGLQELFQAPDLR_	P08697	0.995826	0.995826	7.14134e-23	2.6395e-21	168	P08697	SERPINF2	Alpha-2-antiplasmin	A2AP_HUMAN	1	99.4223	1.99422	Dengue	QC	NaN	NaN	NaN	154.767	0.0847999
Dengue / QC	_VPLLLSEPINIIDALEM[Oxidation (M)]R_	P04114	1.12493	1.12493	9.93854e-23	3.50874e-21	98	P04114	APOB	Apolipoprotein B-100	APOB_HUMAN	1	118.09	2.1809	Dengue	QC	NaN	NaN	NaN	78.8373	0.0959768
Dengue / QC	_NKADYVETVLDSTC[Carbamidomethyl (C)]SSTVQFLEYELNVLGTHK_	P04114	1.32256	1.32256	1.15454e-22	4.00148e-21	106	P04114	APOB	Apolipoprotein B-100	APOB_HUMAN	1	150.11	2.5011	Dengue	QC	NaN	NaN	NaN	94.2247	0.105358
Dengue / QC	_SDLGAVISLLLWGR_	P00739	0.992264	0.992264	1.88671e-22	6.42159e-21	132	P00739	HPR	Haptoglobin-related protein	HPTR_HUMAN	1	98.9304	1.9893	Dengue	QC	NaN	NaN	NaN	95.4171	0.101655
Dengue / QC	_VPLLLSEPINIIDALEMR_	P04114	0.742372	0.742372	1.9015e-22	6.43342e-21	164	P04114	APOB	Apolipoprotein B-100	APOB_HUMAN	1	67.2924	1.67292	Dengue	QC	NaN	NaN	NaN	135.829	0.0701011
Dengue / QC	_MDWLVPATC[Carbamidomethyl (C)]EPIQSVFFFSGDKYYR_	P04004	1.04412	1.04412	1.96381e-22	6.60492e-21	98	P04004	VTN	Vitronectin	VTNC_HUMAN	1	106.211	2.06211	Dengue	QC	NaN	NaN	NaN	83.105	0.0895412
Dengue / QC	_LGEVNTYAGDLQK_	P06727	0.903639	0.903639	2.58316e-22	8.55368e-21	94	P06727	APOA4	Apolipoprotein A-IV	APOA4_HUMAN	1	87.0779	1.87078	Dengue	QC	NaN	NaN	NaN	80.1698	0.0739927
Dengue / QC	_YQEDTC[Carbamidomethyl (C)]YGDAGSAFAVHDLEEDTWYATGILSFDK_	P00738	1.33097	1.33097	2.59169e-22	8.55368e-21	166	P00738	HP	Haptoglobin	HPT_HUMAN	1	151.573	2.51573	Dengue	QC	NaN	NaN	NaN	94.7477	0.0971125
Dengue / QC	_SGLSTGWTQLSKLLELTGPKSLPAPWLSMAPVSWITPGLK_	P04217	1.3087	1.3087	3.46055e-22	1.11129e-20	144	P04217	A1BG	Alpha-1B-glycoprotein	A1BG_HUMAN	1	147.719	2.47719	Dengue	QC	NaN	NaN	NaN	134.336	0.125706
Dengue / QC	_MVC[Carbamidomethyl (C)]AGYK_	H0YAC1;P03952	1.33004	1.33004	3.56097e-22	1.13711e-20	92	H0YAC1;P03952	KLKB1	Plasma kallikrein (Fragment);Plasma kallikrein	H0YAC1_HUMAN;KLKB1_HUMAN	1	151.409	2.51409	Dengue	QC	NaN	NaN	NaN	81.5438	0.0907965
Dengue / QC	_QSMTLSSEVQIPDFDVDLGTILR_	P04114	1.41133	1.41133	3.99058e-22	1.26014e-20	146	P04114	APOB	Apolipoprotein B-100	APOB_HUMAN	1	165.982	2.65982	Dengue	QC	NaN	NaN	NaN	84.3394	0.120952
Dengue / QC	_ESATITC[Carbamidomethyl (C)]LVTGFSPADVFVQWM[Oxidation (M)]QR_	P01871	1.16495	1.16495	6.41919e-22	1.97225e-20	88	P01871	IGHM	Immunoglobulin heavy constant mu	IGHM_HUMAN	1	124.226	2.24226	Dengue	QC	NaN	NaN	NaN	69.3535	0.0820081
Dengue / QC	_LPEGSVSLIILLTDGDPTVGETNPR_	Q14624	1.04297	1.04297	7.19624e-22	2.18735e-20	108	Q14624	ITIH4	Inter-alpha-trypsin inhibitor heavy chain H4	ITIH4_HUMAN	1	106.047	2.06047	Dengue	QC	NaN	NaN	NaN	81.6426	0.0899833
Dengue / QC	_MGPTVSPIC[Carbamidomethyl (C)]LPGTSSDYNLMDGDLGLISGWGR_	P09871	0.657991	0.657991	9.27704e-22	2.80482e-20	172	P09871	C1S	Complement C1s subcomponent	C1S_HUMAN	1	57.7884	1.57788	Dengue	QC	NaN	NaN	NaN	109.088	0.0632267
Dengue / QC	_AKSPPTMVDSLLAVTLAGNLGLTFLR_	Q96PD5	1.39155	1.39155	9.95269e-22	2.96184e-20	122	Q96PD5	PGLYRP2	N-acetylmuramoyl-L-alanine amidase	PGRP2_HUMAN	1	162.361	2.62361	Dengue	QC	NaN	NaN	NaN	83.4895	0.103013
Dengue / QC	_LREQLGPVTQEFWDNLEK_	P02647	1.25566	1.25566	1.04872e-21	3.10466e-20	66	P02647	APOA1	Apolipoprotein A-I	APOA1_HUMAN	1	138.776	2.38776	Dengue	QC	NaN	NaN	NaN	61.065	0.0809698
Dengue / QC	_FFESFGDLSTPDAVMGNPK_	P68871	0.57888	0.57888	1.10283e-21	3.24792e-20	166	P68871	HBB	Hemoglobin subunit beta	HBB_HUMAN	1	49.369	1.49369	Dengue	QC	NaN	NaN	NaN	144.051	0.0543713
Dengue / QC	_MYYSAVEPTK_	E9PFZ2	2.10852	2.10852	1.65549e-21	4.75242e-20	54	E9PFZ2	CP	Ceruloplasmin	E9PFZ2_HUMAN	1	331.248	4.31248	Dengue	QC	NaN	NaN	NaN	29.1121	0.0910537
Dengue / QC	_ALEFLQLHNGR_	P80108	1.23287	1.23287	2.13945e-21	6.11087e-20	50	P80108	GPLD1	Phosphatidylinositol-glycan-specific phospholipase D	PHLD_HUMAN	1	135.035	2.35035	Dengue	QC	NaN	NaN	NaN	43.1802	0.0905914
Dengue / QC	_TTENYPNAGLIMNYC[Carbamidomethyl (C)]R_	P08519	2.06499	2.06499	2.17075e-21	6.16928e-20	40	P08519	LPA	Apolipoprotein(a)	APOA_HUMAN	1	318.432	4.18432	Dengue	QC	NaN	NaN	NaN	33.4513	0.103633
Dengue / QC	_VETVDRFQILTLWLPDSLTTWEIHGLSLSK_	P0C0L5	2.52529	2.52529	2.31942e-21	6.55898e-20	70	P0C0L5	C4B	Complement C4-B	CO4B_HUMAN	1	475.69	5.7569	Dengue	QC	NaN	NaN	NaN	55.8435	0.139764
Dengue / QC	_LRVDPVNFK_	P69905	1.85817	1.85817	2.38183e-21	6.70214e-20	38	P69905	HBA1	Hemoglobin subunit alpha	HBA_HUMAN	1	262.547	3.62547	Dengue	QC	NaN	NaN	NaN	24.7154	0.0645275
Dengue / QC	_EYVLPHFSVSIEPEYNFIGYK_	P01031	1.02858	1.02858	3.17271e-21	8.84004e-20	86	P01031	C5	Complement C5	CO5_HUMAN	1	104.002	2.04002	Dengue	QC	NaN	NaN	NaN	78.5664	0.0968704
Dengue / QC	_GFPRGDKLFGPDLK_	P08697	-0.13505	0.13505	3.94306e-21	1.07752e-19	58	P08697	SERPINF2	Alpha-2-antiplasmin	A2AP_HUMAN	1	-8.93615	0.910638	Dengue	QC	NaN	NaN	NaN	27.6424	0.298032
Dengue / QC	_AVPPNNSNAAEDDLPTVELQGVVPR_	P00488	1.43434	1.43434	4.19722e-21	1.14148e-19	86	P00488	F13A1	Coagulation factor XIII A chain	F13A_HUMAN	1	170.259	2.70259	Dengue	QC	NaN	NaN	NaN	40.7612	0.0924537
Dengue / QC	_GFLLLASLR_	P07996	1.42159	1.42159	5.21989e-21	1.37999e-19	76	P07996	THBS1	Thrombospondin-1	TSP1_HUMAN	1	167.88	2.6788	Dengue	QC	NaN	NaN	NaN	47.416	0.151962
Dengue / QC	_QDSLSSQNQLGVLPLSWDIPELVNMGQWK_	P01024	0.962808	0.962808	5.77957e-21	1.51388e-19	148	P01024	C3	Complement C3	CO3_HUMAN	1	94.9099	1.9491	Dengue	QC	NaN	NaN	NaN	139.078	0.0869115
Dengue / QC	_VGPEADKYR_	P02679	4.62729	4.62729	1.27922e-20	3.16134e-19	114	P02679	FGG	Fibrinogen gamma chain	FIBG_HUMAN	1	2371.45	24.7145	Dengue	QC	NaN	NaN	NaN	81.7512	0.367493
Dengue / QC	_AYIFIDEAHITQALIWLSQR_	P01023	0.934978	0.934978	1.33791e-20	3.26382e-19	98	P01023	A2M	Alpha-2-macroglobulin	A2MG_HUMAN	1	91.1861	1.91186	Dengue	QC	NaN	NaN	NaN	79.9119	0.0905497
Dengue / QC	_WVQTLSEQVQEELLSSQVTQELR_	P02649	1.46764	1.46764	1.61722e-20	3.89504e-19	62	P02649	APOE	Apolipoprotein E	APOE_HUMAN	1	176.568	2.76568	Dengue	QC	NaN	NaN	NaN	53.535	0.113274
Dengue / QC	_EDYLDVYVFGVGPLVNQVNINALASKK_	B4E1Z4	1.78989	1.78989	1.91778e-20	4.56094e-19	72	B4E1Z4	NaN	cDNA FLJ55673, highly similar to Complement factor B (EC 3.4.21.47)	B4E1Z4_HUMAN	1	245.788	3.45788	Dengue	QC	NaN	NaN	NaN	51.5465	0.106215
Dengue / QC	_NPDPVAAPWC[Carbamidomethyl (C)]YTTDPSVR_	P08519	1.2648	1.2648	1.98013e-20	4.6896e-19	46	P08519	LPA	Apolipoprotein(a)	APOA_HUMAN	1	140.293	2.40293	Dengue	QC	NaN	NaN	NaN	38.3933	0.105665
Dengue / QC	_SLFTDLVAEKDLFHC[Carbamidomethyl (C)]VSFTLPR_	P20742	2.56883	2.56883	2.17375e-20	5.10563e-19	62	P20742	PZP	Pregnancy zone protein	PZP_HUMAN	1	493.326	5.93326	Dengue	QC	NaN	NaN	NaN	45.0051	0.146691
Dengue / QC	_TLQGIPQMIGEVIR_	P04114	1.39238	1.39238	2.38237e-20	5.57258e-19	78	P04114	APOB	Apolipoprotein B-100	APOB_HUMAN	1	162.511	2.62511	Dengue	QC	NaN	NaN	NaN	72.3311	0.127229
Dengue / QC	_TDGC[Carbamidomethyl (C)]QHFC[Carbamidomethyl (C)]LPGQESYTC[Carbamidomethyl (C)]SC[Carbamidomethyl (C)]AQGYR_	P22891;P22891-2	1.25534	1.25534	2.49181e-20	5.78099e-19	74	P22891;P22891-2	PROZ	Vitamin K-dependent protein Z;Isoform 2 of Vitamin K-dependent protein Z	PROZ_HUMAN	1	138.723	2.38723	Dengue	QC	NaN	NaN	NaN	52.0668	0.122347
Dengue / QC	_ATNYNAGDR_	P61626	1.46887	1.46887	3.19063e-20	7.37218e-19	106	P61626	LYZ	Lysozyme C	LYSC_HUMAN	1	176.805	2.76805	Dengue	QC	NaN	NaN	NaN	90.0788	0.133122
Dengue / QC	_TSTADYAM[Oxidation (M)]FK_	P02679	4.42745	4.42745	3.35986e-20	7.73176e-19	30	P02679	FGG	Fibrinogen gamma chain	FIBG_HUMAN	1	2051.77	21.5177	Dengue	QC	NaN	NaN	NaN	23.9642	0.141124
Dengue / QC	_HLIVTPSGC[Carbamidomethyl (C)]GEQNMIGMTPTVIAVHYLDETEQWEKFGLEK_	P01024	0.961859	0.961859	3.88237e-20	8.82696e-19	122	P01024	C3	Complement C3	CO3_HUMAN	1	94.7819	1.94782	Dengue	QC	NaN	NaN	NaN	93.5066	0.100743
Dengue / QC	_MRKDDIMLDEGMLQSLMELPDQYNYGMYAK_	P07357	1.01632	1.01632	4.7674e-20	1.06266e-18	94	P07357	C8A	Complement component C8 alpha chain	CO8A_HUMAN	1	102.275	2.02275	Dengue	QC	NaN	NaN	NaN	55.8216	0.0768643
Dengue / QC	_HDTSLKPISVSYNPATAK_	P00915	1.34009	1.34009	5.15817e-20	1.14527e-18	58	P00915	CA1	Carbonic anhydrase 1	CAH1_HUMAN	1	153.167	2.53167	Dengue	QC	NaN	NaN	NaN	50.8	0.0762523
Dengue / QC	_QPNC[Carbamidomethyl (C)]DDPETEEAALVAIDYINQNLPWGYK_	P02765	0.729614	0.729614	6.10389e-20	1.33956e-18	166	P02765	AHSG	Alpha-2-HS-glycoprotein	FETUA_HUMAN	1	65.8196	1.6582	Dengue	QC	NaN	NaN	NaN	94.1077	0.0644787
Dengue / QC	_YIYPLDSLTWIEYWPR_	P01031	1.15704	1.15704	6.91678e-20	1.50632e-18	84	P01031	C5	Complement C5	CO5_HUMAN	1	123	2.23	Dengue	QC	NaN	NaN	NaN	35.3808	0.0812492
Dengue / QC	_GM[Oxidation (M)]TRPLSTLISSSQSC[Carbamidomethyl (C)]QYTLDAK_	P04114	1.27579	1.27579	7.89196e-20	1.69916e-18	42	P04114	APOB	Apolipoprotein B-100	APOB_HUMAN	1	142.131	2.42131	Dengue	QC	NaN	NaN	NaN	37.1434	0.0660344
Dengue / QC	_PYTFHSHGITYYK_	P00450	-0.603026	0.603026	1.77207e-19	3.68954e-18	32	P00450	CP	Ceruloplasmin	CERU_HUMAN	1	-34.1629	0.658371	Dengue	QC	NaN	NaN	NaN	19.2038	0.176349
Dengue / QC	_DFHINLFQVLPWLK_	B4E1Z4	0.81535	0.81535	1.89576e-19	3.93266e-18	176	B4E1Z4	NaN	cDNA FLJ55673, highly similar to Complement factor B (EC 3.4.21.47)	B4E1Z4_HUMAN	1	75.9725	1.75972	Dengue	QC	NaN	NaN	NaN	156.57	0.0845249
Dengue / QC	_VQLSNDFDEYIM[Oxidation (M)]AIEQTIK_	P01024	1.24902	1.24902	2.40369e-19	4.9502e-18	174	P01024	C3	Complement C3	CO3_HUMAN	1	137.68	2.3768	Dengue	QC	NaN	NaN	NaN	142.822	0.0840996
Dengue / QC	_VVYRQYTDSTFRVPVER_	P00450	4.52134	4.52134	2.8459e-19	5.83974e-18	30	P00450	CP	Ceruloplasmin	CERU_HUMAN	1	2196.45	22.9645	Dengue	QC	NaN	NaN	NaN	22.4151	0.13651
Dengue / QC	_EVYM[Oxidation (M)]PSSIFQDDFVIPDISEPGTWK_	P0C0L5	1.27311	1.27311	4.99907e-19	9.93522e-18	168	P0C0L5	C4B	Complement C4-B	CO4B_HUMAN	1	141.683	2.41683	Dengue	QC	NaN	NaN	NaN	155.058	0.101897
Dengue / QC	_KC[Carbamidomethyl (C)]YFPYLENGYNQNHGR_	Q5TFM2	1.33356	1.33356	5.65782e-19	1.11663e-17	54	Q5TFM2	CFH	Complement factor H	Q5TFM2_HUMAN	1	152.023	2.52023	Dengue	QC	NaN	NaN	NaN	46.3311	0.0882454
Dengue / QC	_GSSTWLTAFVLKVLSLAQEQVGGSPEK_	P0C0L5	0.86848	0.86848	5.75726e-19	1.13233e-17	92	P0C0L5	C4B	Complement C4-B	CO4B_HUMAN	1	82.5739	1.82574	Dengue	QC	NaN	NaN	NaN	50.0469	0.0960592
Dengue / QC	_DFHINLFQVLPWLKEKLQDEDLGFL_	B4E1Z4	3.52132	3.52132	7.2212e-19	1.3961e-17	38	B4E1Z4	NaN	cDNA FLJ55673, highly similar to Complement factor B (EC 3.4.21.47)	B4E1Z4_HUMAN	1	1048.21	11.4821	Dengue	QC	NaN	NaN	NaN	32.1662	0.178441
Dengue / QC	_FGGVLHLSDLDDDGLDEIIMAAPLR_	P80108	0.876994	0.876994	7.47637e-19	1.44053e-17	162	P80108	GPLD1	Phosphatidylinositol-glycan-specific phospholipase D	PHLD_HUMAN	1	83.6545	1.83654	Dengue	QC	NaN	NaN	NaN	134.47	0.0940022
Dengue / QC	_GLQDEDGYRMK_	P0C0L5	4.58522	4.58522	7.61762e-19	1.46279e-17	62	P0C0L5	C4B	Complement C4-B	CO4B_HUMAN	1	2300.42	24.0042	Dengue	QC	NaN	NaN	NaN	39.8252	0.312816
Dengue / QC	_ATLVC[Carbamidomethyl (C)]LISDFYPGAVTVAWK_	P0DOY2	1.06557	1.06557	8.29834e-19	1.58281e-17	176	P0DOY2	IGLC2	Immunoglobulin lambda constant 2	IGLC2_HUMAN	1	109.3	2.093	Dengue	QC	NaN	NaN	NaN	107.569	0.0924273
Dengue / QC	_WNPSPPAC[Carbamidomethyl (C)]EPNSC[Carbamidomethyl (C)]INLPDIPHASWETYPRPTKEDVYVVGTVLR_	P04003	1.33937	1.33937	9.18868e-19	1.73517e-17	90	P04003	C4BPA	C4b-binding protein alpha chain	C4BPA_HUMAN	1	153.041	2.53041	Dengue	QC	NaN	NaN	NaN	81.8843	0.0949173
Dengue / QC	_LTIGEGQQHHLGGAK_	P02679	8.54894	8.54894	9.91209e-19	1.85942e-17	34	P02679	FGG	Fibrinogen gamma chain	FIBG_HUMAN	1	37353	374.53	Dengue	QC	NaN	NaN	NaN	24.2975	0.29896
Dengue / QC	_NPSDPMPQAPALWIETTAYALLHLLLHEGK_	P0C0L5	1.39807	1.39807	1.07668e-18	1.99344e-17	36	P0C0L5	C4B	Complement C4-B	CO4B_HUMAN	1	163.548	2.63548	Dengue	QC	NaN	NaN	NaN	29.5263	0.109618
Dengue / QC	_DDWFMLGLR_	I3L145;P04278	0.650466	0.650466	1.09884e-18	2.02129e-17	54	I3L145;P04278	SHBG	Sex hormone-binding globulin	I3L145_HUMAN;SHBG_HUMAN	1	56.9675	1.56967	Dengue	QC	NaN	NaN	NaN	29.4377	0.203931
Dengue / QC	_TEC[Carbamidomethyl (C)]FITGWGETQGTFGAGLLK_	P00747	0.749506	0.749506	1.29212e-18	2.36917e-17	108	P00747	PLG	Plasminogen	PLMN_HUMAN	1	68.1217	1.68122	Dengue	QC	NaN	NaN	NaN	80.4522	0.0765471
Dengue / QC	_IFFPGVSEFGK_	F8WF14;P06276	0.972859	0.972859	1.50039e-18	2.72467e-17	54	F8WF14;P06276	BCHE	Carboxylic ester hydrolase;Cholinesterase	F8WF14_HUMAN;CHLE_HUMAN	1	96.2727	1.96273	Dengue	QC	NaN	NaN	NaN	47.5222	0.0923887
Dengue / QC	_NGESVKLHLETDSLALVALGALDTALYAAGSK_	P0C0L5	1.41107	1.41107	1.83196e-18	3.29521e-17	146	P0C0L5	C4B	Complement C4-B	CO4B_HUMAN	1	165.934	2.65934	Dengue	QC	NaN	NaN	NaN	105.89	0.119267
Dengue / QC	_NM[Oxidation (M)]EVSVATTTK_	P04114	1.34515	1.34515	2.02844e-18	3.59428e-17	48	P04114	APOB	Apolipoprotein B-100	APOB_HUMAN	1	154.057	2.54057	Dengue	QC	NaN	NaN	NaN	32.7011	0.0761807
Dengue / QC	_C[Carbamidomethyl (C)]AEENC[Carbamidomethyl (C)]FIQKSDDKVTLEER_	P01024	3.17569	3.17569	2.0469e-18	3.61322e-17	38	P01024	C3	Complement C3	CO3_HUMAN	1	803.603	9.03603	Dengue	QC	NaN	NaN	NaN	33.6712	0.177581
Dengue / QC	_TVAAC[Carbamidomethyl (C)]NLPIVRGPC[Carbamidomethyl (C)]R_	P02760	3.88629	3.88629	2.10815e-18	3.70982e-17	28	P02760	AMBP	Protein AMBP	AMBP_HUMAN	1	1378.74	14.7874	Dengue	QC	NaN	NaN	NaN	18.7834	0.109505
Dengue / QC	_LREQLGPVTQEFWDNLEKETEGLR_	P02647	1.73126	1.73126	2.47642e-18	4.30458e-17	44	P02647	APOA1	Apolipoprotein A-I	APOA1_HUMAN	1	232.017	3.32017	Dengue	QC	NaN	NaN	NaN	38.0853	0.112424
Dengue / QC	_M[Oxidation (M)]ELERPGGNEITR_	P02671	4.77124	4.77124	3.11684e-18	5.38485e-17	38	P02671	FGA	Fibrinogen alpha chain	FIBA_HUMAN	1	2630.79	27.3079	Dengue	QC	NaN	NaN	NaN	31.424	0.213809
Dengue / QC	_NTEQEEGGEAVHEVEVVIK_	P00742	0.872609	0.872609	3.48878e-18	5.97296e-17	104	P00742	F10	Coagulation factor X	FA10_HUMAN	1	83.0971	1.83097	Dengue	QC	NaN	NaN	NaN	90.0518	0.0773085
Dengue / QC	_VADALTNAVAHVDDM[Oxidation (M)]PNALSALSDLHAHK_	P69905	1.19632	1.19632	3.58618e-18	6.12128e-17	80	P69905	HBA1	Hemoglobin subunit alpha	HBA_HUMAN	1	129.155	2.29155	Dengue	QC	NaN	NaN	NaN	63.1032	0.0718113
Dengue / QC	_ILLMDLNEEDPTVLELGITGSK_	P27169	0.793767	0.793767	4.01574e-18	6.83398e-17	174	P27169	PON1	Serum paraoxonase/arylesterase 1	PON1_HUMAN	1	73.3595	1.73359	Dengue	QC	NaN	NaN	NaN	114.066	0.0698057
Dengue / QC	_ATLDVDEAGTEAAAATSFAIK_	P29622	0.725827	0.725827	4.10997e-18	6.97346e-17	134	P29622	SERPINA4	Kallistatin	KAIN_HUMAN	1	65.3848	1.65385	Dengue	QC	NaN	NaN	NaN	92.6369	0.0771063
Dengue / QC	_HYLM[Oxidation (M)]WGLSSDFWGEKPNLSYIIGK_	P01024	1.152	1.152	4.56266e-18	7.60533e-17	98	P01024	C3	Complement C3	CO3_HUMAN	1	122.221	2.22221	Dengue	QC	NaN	NaN	NaN	72.5622	0.101386
Dengue / QC	_ADDKETC[Carbamidomethyl (C)]FAEEPTMR_	A0A0C4DGB6	1.2123	1.2123	5.36654e-18	8.91913e-17	76	A0A0C4DGB6	ALB	Serum albumin	A0A0C4DGB6_HUMAN	1	131.706	2.31706	Dengue	QC	NaN	NaN	NaN	60.1894	0.096936
Dengue / QC	_GWSPTPR_	Q02985;Q02985-2	1.81437	1.81437	5.66645e-18	9.36282e-17	50	Q02985;Q02985-2	CFHR3	Complement factor H-related protein 3;Isoform 2 of Complement factor H-related protein 3	FHR3_HUMAN	1	251.705	3.51705	Dengue	QC	NaN	NaN	NaN	43.6194	0.129789
Dengue / QC	_LGREGVQKEDIPPADLSDQVPDTESETR_	P01024	2.90069	2.90069	5.86017e-18	9.65484e-17	90	P01024	C3	Complement C3	CO3_HUMAN	1	646.782	7.46782	Dengue	QC	NaN	NaN	NaN	61.3716	0.241757
Dengue / QC	_LPSNVVK_	P20742	1.73051	1.73051	6.60041e-18	1.08117e-16	32	P20742	PZP	Pregnancy zone protein	PZP_HUMAN	1	231.844	3.31844	Dengue	QC	NaN	NaN	NaN	25.6018	0.0912516
Dengue / QC	_AVLDVFEEGTEASAATAVKITLLSALVETR_	P01011	1.76714	1.76714	7.0946e-18	1.15547e-16	96	P01011	SERPINA3	Alpha-1-antichymotrypsin	AACT_HUMAN	1	240.378	3.40378	Dengue	QC	NaN	NaN	NaN	88.4111	0.148183
Dengue / QC	_QLEQVIAK_	P02671	4.1028	4.1028	7.59019e-18	1.22655e-16	84	P02671	FGA	Fibrinogen alpha chain	FIBA_HUMAN	1	1618.17	17.1817	Dengue	QC	NaN	NaN	NaN	59.3678	0.315632
Dengue / QC	_WC[Carbamidomethyl (C)]AVSEHEATKC[Carbamidomethyl (C)]QSFRDHMK_	P02787	8.46929	8.46929	7.59583e-18	1.22655e-16	24	P02787	TF	Serotransferrin	TRFE_HUMAN	1	35341.4	354.414	Dengue	QC	NaN	NaN	NaN	15.2089	0.168082
Dengue / QC	_SGLSTGWTQLSKLLELTGPKSLPAPWLSM[Oxidation (M)]APVSWITPGLK_	P04217	1.01062	1.01062	9.49822e-18	1.51651e-16	64	P04217	A1BG	Alpha-1B-glycoprotein	A1BG_HUMAN	1	101.477	2.01477	Dengue	QC	NaN	NaN	NaN	46.6138	0.191285
Dengue / QC	_EPC[Carbamidomethyl (C)]VESLVSQYFQTVTDYGKDLM[Oxidation (M)]EK_	P02652;V9GYM3	0.870344	0.870344	1.16651e-17	1.83162e-16	80	P02652;V9GYM3	APOA2	Apolipoprotein A-II	APOA2_HUMAN;V9GYM3_HUMAN	1	82.8099	1.8281	Dengue	QC	NaN	NaN	NaN	67.8332	0.0785657
Dengue / QC	_MYYSAVEPTKDIFTGLIGPMK_	E9PFZ2	1.64169	1.64169	1.20086e-17	1.88035e-16	104	E9PFZ2	CP	Ceruloplasmin	E9PFZ2_HUMAN	1	212.032	3.12032	Dengue	QC	NaN	NaN	NaN	62.057	0.128705
Dengue / QC	_ETY[Sulfation (Y)]GEMADC[Carbamidomethyl (C)]C[Carbamidomethyl (C)]AK_	P02768	0.00936179	0.00936179	1.61729e-17	2.49124e-16	90	P02768	ALB	Serum albumin	ALBU_HUMAN	1	0.65102	1.00651	Dengue	QC	NaN	NaN	NaN	19.8166	0.150762
Dengue / QC	_AIFYMNNPSR_	Q9UGM5	0.655468	0.655468	1.9606e-17	2.98293e-16	72	Q9UGM5	FETUB	Fetuin-B	FETUB_HUMAN	1	57.5127	1.57513	Dengue	QC	NaN	NaN	NaN	67.326	0.0574136
Dengue / QC	_SSTSPTTNVLLSPLSVATALSALSLGAEQR_	P36955	0.910424	0.910424	1.96273e-17	2.98293e-16	172	P36955	SERPINF1	Pigment epithelium-derived factor	PEDF_HUMAN	1	87.9598	1.8796	Dengue	QC	NaN	NaN	NaN	145.958	0.107858
Dengue / QC	_AVVEVDESGTR_	P05154	3.43489	3.43489	2.179e-17	3.26792e-16	46	P05154	SERPINA5	Plasma serine protease inhibitor	IPSP_HUMAN	1	981.447	10.8145	Dengue	QC	NaN	NaN	NaN	38.1896	0.288935
Dengue / QC	_SILQM[Oxidation (M)]SLDHHIVTPLTSLVIENEAGDER_	P19823	1.91267	1.91267	2.28615e-17	3.41062e-16	130	P19823	ITIH2	Inter-alpha-trypsin inhibitor heavy chain H2	ITIH2_HUMAN	1	276.506	3.76506	Dengue	QC	NaN	NaN	NaN	113.765	0.15504
Dengue / QC	_LSLEIEQLELQRDSAR_	P04003	2.25788	2.25788	2.54737e-17	3.77064e-16	46	P04003	C4BPA	C4b-binding protein alpha chain	C4BPA_HUMAN	1	378.29	4.7829	Dengue	QC	NaN	NaN	NaN	31.9364	0.124568
Dengue / QC	_QHLPLIK_	P02671	3.59504	3.59504	2.69103e-17	3.97293e-16	32	P02671	FGA	Fibrinogen alpha chain	FIBA_HUMAN	1	1108.41	12.0841	Dengue	QC	NaN	NaN	NaN	23.1862	0.141093
Dengue / QC	_TPENYPNAGLTENYC[Carbamidomethyl (C)]R_	P08519	1.9779	1.9779	3.34638e-17	4.85225e-16	42	P08519	LPA	Apolipoprotein(a)	APOA_HUMAN	1	293.919	3.93919	Dengue	QC	NaN	NaN	NaN	33.1039	0.147695
Dengue / QC	_SLEYLDLSFNQIAR_	P51884	1.06866	1.06866	3.48799e-17	5.03192e-16	120	P51884	LUM	Lumican	LUM_HUMAN	1	109.748	2.09748	Dengue	QC	NaN	NaN	NaN	104.599	0.124845
Dengue / QC	_ALTDM[Oxidation (M)]PQMR_	P02671	2.90895	2.90895	3.86645e-17	5.56377e-16	34	P02671	FGA	Fibrinogen alpha chain	FIBA_HUMAN	1	651.073	7.51073	Dengue	QC	NaN	NaN	NaN	28.6448	0.153007
Dengue / QC	_SFEGLGQLEVLTLDHNQLQEVK_	P35858;P35858-2	1.0821	1.0821	4.02691e-17	5.78004e-16	76	P35858;P35858-2	IGFALS	Insulin-like growth factor-binding protein complex acid labile subunit;Isoform 2 of Insulin-like growth factor-binding protein complex acid labile subunit	ALS_HUMAN	1	111.712	2.11712	Dengue	QC	NaN	NaN	NaN	69.33	0.0833695
Dengue / QC	_QFPILLDFKTK_	P05546	0.917733	0.917733	4.32906e-17	6.16702e-16	94	P05546	SERPIND1	Heparin cofactor 2	HEP2_HUMAN	1	88.9145	1.88914	Dengue	QC	NaN	NaN	NaN	88.3498	0.0948306
Dengue / QC	_VGFYESDVMGRGHAR_	P01023	4.67364	4.67364	4.7233e-17	6.71181e-16	24	P01023	A2M	Alpha-2-macroglobulin	A2MG_HUMAN	1	2452.15	25.5215	Dengue	QC	NaN	NaN	NaN	17.7202	0.125039
Dengue / QC	_GDFSSANNRDNTYNR_	P02671	4.30441	4.30441	4.92022e-17	6.95684e-16	40	P02671	FGA	Fibrinogen alpha chain	FIBA_HUMAN	1	1875.87	19.7587	Dengue	QC	NaN	NaN	NaN	30.0266	0.262912
Dengue / QC	_FSGTWYAMAKK_	P02753;Q5VY30	2.14221	2.14221	5.07391e-17	7.13864e-16	40	P02753;Q5VY30	RBP4	Retinol-binding protein 4;Retinol binding protein 4, plasma, isoform CRA_b	RET4_HUMAN;Q5VY30_HUMAN	1	341.439	4.41439	Dengue	QC	NaN	NaN	NaN	34.6742	0.141812
Dengue / QC	_VTTVASHTSDSDVPSGVTEVVVKLFDSDPITVTVPVEVSR_	P10909;P10909-2;P10909-4;P10909-5	1.24611	1.24611	5.25287e-17	7.37218e-16	126	P10909;P10909-2;P10909-4;P10909-5	CLU	Clusterin;Isoform 2 of Clusterin;Isoform 4 of Clusterin;Isoform 5 of Clusterin	CLUS_HUMAN	1	137.201	2.37201	Dengue	QC	NaN	NaN	NaN	104.398	0.129277
Dengue / QC	_TLLLVGSPTWK_	P80108	1.05934	1.05934	6.15139e-17	8.52793e-16	76	P80108	GPLD1	Phosphatidylinositol-glycan-specific phospholipase D	PHLD_HUMAN	1	108.397	2.08397	Dengue	QC	NaN	NaN	NaN	56.5526	0.0972313
Dengue / QC	_SSTSPTTNVLLSPLSVATALSALSLGAEQRTESIIHR_	P36955	1.89269	1.89269	7.13811e-17	9.77663e-16	58	P36955	SERPINF1	Pigment epithelium-derived factor	PEDF_HUMAN	1	271.326	3.71326	Dengue	QC	NaN	NaN	NaN	37.4318	0.176312
Dengue / QC	_QFTSSTSYNRGDSTFESKSYK_	P02671	3.22182	3.22182	7.79128e-17	1.05694e-15	30	P02671	FGA	Fibrinogen alpha chain	FIBA_HUMAN	1	832.962	9.32962	Dengue	QC	NaN	NaN	NaN	21.9168	0.127349
Dengue / QC	_C[Carbamidomethyl (C)]TLKPC[Carbamidomethyl (C)]DYPDIKHGGLYHENMR_	P08603	3.67877	3.67877	8.11984e-17	1.09368e-15	32	P08603	CFH	Complement factor H	CFAH_HUMAN	1	1180.62	12.8062	Dengue	QC	NaN	NaN	NaN	27.5431	0.196307
Dengue / QC	_VVAGVANALAHKYH_	P68871	0.984525	0.984525	8.14981e-17	1.09512e-15	52	P68871	HBB	Hemoglobin subunit beta	HBB_HUMAN	1	97.8661	1.97866	Dengue	QC	NaN	NaN	NaN	42.6289	0.0790518
Dengue / QC	_QGLLPVLESFK_	P02647	1.60141	1.60141	9.23663e-17	1.23242e-15	54	P02647	APOA1	Apolipoprotein A-I	APOA1_HUMAN	1	203.439	3.03439	Dengue	QC	NaN	NaN	NaN	41.1293	0.0991377
Dengue / QC	_EVDLKDYEDQQK_	P02671	3.50274	3.50274	1.03423e-16	1.37029e-15	78	P02671	FGA	Fibrinogen alpha chain	FIBA_HUMAN	1	1033.52	11.3352	Dengue	QC	NaN	NaN	NaN	55.5841	0.269957
Dengue / QC	_GLPNVVTSAISLPNIR_	A0A0U1RR20;Q92954;Q92954-3;Q92954-6	1.28446	1.28446	1.04964e-16	1.38747e-15	74	A0A0U1RR20;Q92954;Q92954-3;Q92954-6	PRG4	Proteoglycan 4;Proteoglycan 4;Isoform C of Proteoglycan 4;Isoform F of Proteoglycan 4	A0A0U1RR20_HUMAN;PRG4_HUMAN;PRG4_HUMAN;PRG4_HUMAN	1	143.591	2.43591	Dengue	QC	NaN	NaN	NaN	44.0964	0.121915
Dengue / QC	_GGASEHITTLAYQELPTADLM[Oxidation (M)]QEWGDAVQYNPAIIK_	P07358	0.563227	0.563227	1.12026e-16	1.46912e-15	44	P07358	C8B	Complement component C8 beta chain	CO8B_HUMAN	1	47.757	1.47757	Dengue	QC	NaN	NaN	NaN	21.1551	0.243377
Dengue / QC	_AAPSVTLFPPSSEELQANKATLVC[Carbamidomethyl (C)]LISDFYPGAVTVAWKADSSPVK_	P0DOY2	2.29722	2.29722	1.42434e-16	1.84418e-15	96	P0DOY2	IGLC2	Immunoglobulin lambda constant 2	IGLC2_HUMAN	1	391.509	4.91509	Dengue	QC	NaN	NaN	NaN	76.398	0.210347
Dengue / QC	_A[Acetyl (Protein N-term)]SPDWGYDDKNGPEQWSK_	P00915	2.01582	2.01582	1.65108e-16	2.12806e-15	70	P00915	CA1	Carbonic anhydrase 1	CAH1_HUMAN	1	304.409	4.04409	Dengue	QC	NaN	NaN	NaN	59.9777	0.178454
Dengue / QC	_SLKVVPEGIR_	P01024	2.34493	2.34493	1.70686e-16	2.19003e-15	74	P01024	C3	Complement C3	CO3_HUMAN	1	408.037	5.08037	Dengue	QC	NaN	NaN	NaN	51.0025	0.201543
Dengue / QC	_SLDFTELDVAAEKIDRFMQAVTGWK_	P01019	1.72147	1.72147	1.72404e-16	2.20213e-15	74	P01019	AGT	Angiotensinogen	ANGT_HUMAN	1	229.772	3.29772	Dengue	QC	NaN	NaN	NaN	54.6361	0.126545
Dengue / QC	_YRGDQDATMSILDISMMTGFAPDTDDLKQLANGVDR_	P01024	0.851588	0.851588	1.87124e-16	2.38478e-15	142	P01024	C3	Complement C3	CO3_HUMAN	1	80.4486	1.80449	Dengue	QC	NaN	NaN	NaN	103.754	0.0872251
Dengue / QC	_MSSINADFAFNLYR_	P05543	1.41101	1.41101	1.88526e-16	2.39727e-15	54	P05543	SERPINA7	Thyroxine-binding globulin	THBG_HUMAN	1	165.923	2.65923	Dengue	QC	NaN	NaN	NaN	45.3049	0.132843
Dengue / QC	_GIVAAFYSGPSLSDKEK_	P80108	0.976693	0.976693	2.34347e-16	2.94046e-15	54	P80108	GPLD1	Phosphatidylinositol-glycan-specific phospholipase D	PHLD_HUMAN	1	96.7949	1.96795	Dengue	QC	NaN	NaN	NaN	41.4561	0.0883857
Dengue / QC	_EYVLPSFEVIVEPTEKFYYIYNEK_	P01024	1.09971	1.09971	2.43819e-16	3.03253e-15	144	P01024	C3	Complement C3	CO3_HUMAN	1	114.312	2.14312	Dengue	QC	NaN	NaN	NaN	95.4458	0.107176
Dengue / QC	_DC[Carbamidomethyl (C)]SLPYATESKEC[Carbamidomethyl (C)]R_	P23142	3.00162	3.00162	2.93206e-16	3.60732e-15	72	P23142	FBLN1	Fibulin-1	FBLN1_HUMAN	1	700.899	8.00899	Dengue	QC	NaN	NaN	NaN	58.0298	0.241154
Dengue / QC	_FGSSLITVR_	P80108	0.57552	0.57552	3.2167e-16	3.92361e-15	162	P80108	GPLD1	Phosphatidylinositol-glycan-specific phospholipase D	PHLD_HUMAN	1	49.0215	1.49021	Dengue	QC	NaN	NaN	NaN	111.495	0.0565856
Dengue / QC	_VPTVEPLDSLTLFLFR_	J3QQR8;J3QQX6;J3QRQ1;P13598	1.46389	1.46389	3.51145e-16	4.25567e-15	42	J3QQR8;J3QQX6;J3QRQ1;P13598	ICAM2	Intercellular adhesion molecule 2 (Fragment);Intercellular adhesion molecule 2 (Fragment);Intercellular adhesion molecule 2 (Fragment);Intercellular adhesion molecule 2	J3QQR8_HUMAN;J3QQX6_HUMAN;J3QRQ1_HUMAN;ICAM2_HUMAN	1	175.852	2.75852	Dengue	QC	NaN	NaN	NaN	31.1009	0.105462
Dengue / QC	_SMQGGLVGNDETVALTAFVTIALHHGLAVFQDEGAEPLK_	P0C0L5	1.37581	1.37581	3.5727e-16	4.32069e-15	76	P0C0L5	C4B	Complement C4-B	CO4B_HUMAN	1	159.513	2.59513	Dengue	QC	NaN	NaN	NaN	71.8632	0.131991
Dengue / QC	_DTWVEHWPEEDEC[Carbamidomethyl (C)]QDEENQKQC[Carbamidomethyl (C)]QDLGAFTESMVVFGC[Carbamidomethyl (C)]PN_	P01024	1.2657	1.2657	3.74073e-16	4.50473e-15	142	P01024	C3	Complement C3	CO3_HUMAN	1	140.444	2.40444	Dengue	QC	NaN	NaN	NaN	43.7538	0.110944
Dengue / QC	_HQSAC[Carbamidomethyl (C)]KDSDWPFC[Carbamidomethyl (C)]SDEDWNYK_	P02671	2.66084	2.66084	3.98866e-16	4.78302e-15	48	P02671	FGA	Fibrinogen alpha chain	FIBA_HUMAN	1	532.399	6.32399	Dengue	QC	NaN	NaN	NaN	40.3081	0.193912
Dengue / QC	_SDFASNC[Carbamidomethyl (C)]C[Carbamidomethyl (C)]SINSPPLYC[Carbamidomethyl (C)]DSEIDAELKNIL_	P02774;P02774-3	0.871331	0.871331	4.13813e-16	4.94141e-15	156	P02774;P02774-3	GC	Vitamin D-binding protein;Isoform 3 of Vitamin D-binding protein	VTDB_HUMAN	1	82.935	1.82935	Dengue	QC	NaN	NaN	NaN	96.0206	0.0967644
Dengue / QC	_RAPYPNYDRDILTIDIGR_	Q16610	0.968276	0.968276	4.32644e-16	5.14467e-15	100	Q16610	ECM1	Extracellular matrix protein 1	ECM1_HUMAN	1	95.6501	1.9565	Dengue	QC	NaN	NaN	NaN	89.3509	0.101553
Dengue / QC	_TLMNLGGLAVAR_	P37802;X6RJP6	1.40108	1.40108	5.56952e-16	6.58153e-15	52	P37802;X6RJP6	TAGLN2	Transgelin-2;Transgelin-2 (Fragment)	TAGL2_HUMAN;X6RJP6_HUMAN	1	164.099	2.64099	Dengue	QC	NaN	NaN	NaN	33.9894	0.120776
Dengue / QC	_QSNNKYAASSYLSLTPEQWR_	P15814	2.31053	2.31053	5.97272e-16	7.02877e-15	80	P15814	IGLL1	Immunoglobulin lambda-like polypeptide 1	IGLL1_HUMAN	1	396.064	4.96064	Dengue	QC	NaN	NaN	NaN	61.1325	0.18423
Dengue / QC	_GEC[Carbamidomethyl (C)]QAEGVLFFQGDR_	P02790	0.879896	0.879896	6.06858e-16	7.12683e-15	92	P02790	HPX	Hemopexin	HEMO_HUMAN	1	84.0243	1.84024	Dengue	QC	NaN	NaN	NaN	76.4925	0.0942133
Dengue / QC	_STAAMSTYTGIFTDQVLSVLKGEE_	A0A024R0T9;K7ER74;P02655	0.752271	0.752271	6.08857e-16	7.13555e-15	134	A0A024R0T9;K7ER74;P02655	APOC4-APOC2;APOC4-APOC2;APOC2	Apolipoprotein C-II isoform 1;APOC4-APOC2 readthrough (NMD candidate);Apolipoprotein C-II	A0A024R0T9_HUMAN;K7ER74_HUMAN;APOC2_HUMAN	1	68.4442	1.68444	Dengue	QC	NaN	NaN	NaN	100.067	0.0714449
Dengue / QC	_QTVNLQLQPYSLVTTLNSDLK_	P04114	1.12101	1.12101	6.98812e-16	8.08971e-15	126	P04114	APOB	Apolipoprotein B-100	APOB_HUMAN	1	117.499	2.17499	Dengue	QC	NaN	NaN	NaN	82.9733	0.0914359
Dengue / QC	_SLGNVIMVC[Carbamidomethyl (C)]R_	P08603	0.762844	0.762844	7.18029e-16	8.27845e-15	138	P08603	CFH	Complement factor H	CFAH_HUMAN	1	69.6832	1.69683	Dengue	QC	NaN	NaN	NaN	115.36	0.0787188
Dengue / QC	_LFLEPTRKDIALLK_	P00747	3.74441	3.74441	7.33577e-16	8.44059e-15	70	P00747	PLG	Plasminogen	PLMN_HUMAN	1	1240.23	13.4023	Dengue	QC	NaN	NaN	NaN	44.1274	0.252215
Dengue / QC	_SPAGPTVVSIGGGK_	P09172	1.4629	1.4629	1.00625e-15	1.14077e-14	50	P09172	DBH	Dopamine beta-hydroxylase	DOPO_HUMAN	1	175.662	2.75662	Dengue	QC	NaN	NaN	NaN	44.3076	0.109354
Dengue / QC	_GDGTFVDAAASAGVDDPHQHGR_	A0A0C4DFP6;Q9NQ79;Q9NQ79-2	1.03434	1.03434	1.60855e-15	1.78575e-14	34	A0A0C4DFP6;Q9NQ79;Q9NQ79-2	CRTAC1	Cartilage acidic protein 1;Cartilage acidic protein 1;Isoform 2 of Cartilage acidic protein 1	A0A0C4DFP6_HUMAN;CRAC1_HUMAN;CRAC1_HUMAN	1	104.817	2.04817	Dengue	QC	NaN	NaN	NaN	29.5911	0.0977307
Dengue / QC	_WADLSGITK_	P29622	0.953765	0.953765	1.90304e-15	2.0882e-14	36	P29622	SERPINA4	Kallistatin	KAIN_HUMAN	1	93.692	1.93692	Dengue	QC	NaN	NaN	NaN	28.1501	0.0807342
Dengue / QC	_EGGQTAPASTR_	P06396	1.25136	1.25136	2.09007e-15	2.28901e-14	116	P06396	GSN	Gelsolin	GELS_HUMAN	1	138.066	2.38066	Dengue	QC	NaN	NaN	NaN	108.566	0.121421
Dengue / QC	_ATWSGAVLAGRDAVLR_	P04217	3.86677	3.86677	2.21801e-15	2.40137e-14	52	P04217	A1BG	Alpha-1B-glycoprotein	A1BG_HUMAN	1	1358.86	14.5886	Dengue	QC	NaN	NaN	NaN	41.3126	0.317231
Dengue / QC	_ESDWLGQSM[Oxidation (M)]FTC[Carbamidomethyl (C)]R_	P01871	1.36338	1.36338	2.24993e-15	2.42668e-14	48	P01871	IGHM	Immunoglobulin heavy constant mu	IGHM_HUMAN	1	157.287	2.57287	Dengue	QC	NaN	NaN	NaN	39.8575	0.119886
Dengue / QC	_VISTLEEPTPQC[Carbamidomethyl (C)]PTSQGR_	P09172	0.965251	0.965251	2.42758e-15	2.59368e-14	72	P09172	DBH	Dopamine beta-hydroxylase	DOPO_HUMAN	1	95.2403	1.9524	Dengue	QC	NaN	NaN	NaN	47.1037	0.123289
Dengue / QC	_TAMDVFVC[Carbamidomethyl (C)]TYFM[Oxidation (M)]PAAQLPELPDVELPTNKDVC[Carbamidomethyl (C)]DPGNTK_	P02774;P02774-3	1.47036	1.47036	2.46694e-15	2.62585e-14	122	P02774;P02774-3	GC	Vitamin D-binding protein;Isoform 3 of Vitamin D-binding protein	VTDB_HUMAN	1	177.09	2.7709	Dengue	QC	NaN	NaN	NaN	80.2558	0.161506
Dengue / QC	_QC[Carbamidomethyl (C)]SKEDGGGWWYNR_	P02675	3.42575	3.42575	2.49137e-15	2.64691e-14	90	P02675	FGB	Fibrinogen beta chain	FIBB_HUMAN	1	974.616	10.7462	Dengue	QC	NaN	NaN	NaN	63.4734	0.303136
Dengue / QC	_TAGPDQTEM[Oxidation (M)]TIEGLQPTVEYVVSVYAQNPSGESQPLVQTAVTTIPAPTDLK_	P02751-14;P02751-8	1.23088	1.23088	2.63127e-15	2.76453e-14	140	P02751-14;P02751-8	FN1	Isoform 14 of Fibronectin;Isoform 8 of Fibronectin	FINC_HUMAN	1	134.711	2.34711	Dengue	QC	NaN	NaN	NaN	117.599	0.155598
Dengue / QC	_WNPEVDC[Carbamidomethyl (C)]TEKR_	Q9BXR6	1.03226	1.03226	2.66663e-15	2.79137e-14	26	Q9BXR6	CFHR5	Complement factor H-related protein 5	FHR5_HUMAN	1	104.523	2.04523	Dengue	QC	NaN	NaN	NaN	20.3901	0.154955
Dengue / QC	_AC[Carbamidomethyl (C)]EPGVDYVYKTR_	P01024	3.31188	3.31188	2.87584e-15	2.99383e-14	32	P01024	C3	Complement C3	CO3_HUMAN	1	893.061	9.93061	Dengue	QC	NaN	NaN	NaN	23.4612	0.144931
Dengue / QC	_ALDYYMLR_	Q9Y490	1.4912	1.4912	2.88263e-15	2.99541e-14	38	Q9Y490	TLN1	Talin-1	TLN1_HUMAN	1	181.122	2.81122	Dengue	QC	NaN	NaN	NaN	31.6316	0.128026
Dengue / QC	_SYLSMVGSC[Carbamidomethyl (C)]C[Carbamidomethyl (C)]TSASPTVC[Carbamidomethyl (C)]FLK_	P02774;P02774-3	0.625739	0.625739	2.92378e-15	3.03263e-14	112	P02774;P02774-3	GC	Vitamin D-binding protein;Isoform 3 of Vitamin D-binding protein	VTDB_HUMAN	1	54.3001	1.543	Dengue	QC	NaN	NaN	NaN	100.922	0.0795714
Dengue / QC	_YFKPGMPFDLM[Oxidation (M)]VFVTNPDGSPAYR_	P01024	2.35294	2.35294	3.3718e-15	3.4846e-14	54	P01024	C3	Complement C3	CO3_HUMAN	1	410.864	5.10864	Dengue	QC	NaN	NaN	NaN	47.0728	0.160209
Dengue / QC	_KQC[Carbamidomethyl (C)]SKEDGGGWWYNR_	P02675	2.2574	2.2574	3.40435e-15	3.51185e-14	32	P02675	FGB	Fibrinogen beta chain	FIBB_HUMAN	1	378.13	4.7813	Dengue	QC	NaN	NaN	NaN	26.2353	0.124605
Dengue / QC	_PLLVDVDLQYPQDAVLALTQNHHK_	P19827	1.03174	1.03174	3.55518e-15	3.6608e-14	102	P19827	ITIH1	Inter-alpha-trypsin inhibitor heavy chain H1	ITIH1_HUMAN	1	104.448	2.04448	Dengue	QC	NaN	NaN	NaN	89.8863	0.133178
Dengue / QC	_TVMVNIENPEGIPVKQDSLSSQNQLGVLPLSWDIPELVNM[Oxidation (M)]GQWK_	P01024	0.815107	0.815107	3.78787e-15	3.87932e-14	146	P01024	C3	Complement C3	CO3_HUMAN	1	75.9429	1.75943	Dengue	QC	NaN	NaN	NaN	80.3228	0.0963972
Dengue / QC	_HATKTAKDALSSVQESQVAQQAR_	B0YIW2;P02656	1.75767	1.75767	3.87389e-15	3.95317e-14	54	B0YIW2;P02656	APOC3	Apolipoprotein C-III	B0YIW2_HUMAN;APOC3_HUMAN	1	238.152	3.38152	Dengue	QC	NaN	NaN	NaN	48.5243	0.150351
Dengue / QC	_APVGHFYEPQAPSAEVEMTSYVLLAYLTAQPAPTSEDLTSATNIVK_	P01023	0.867864	0.867864	3.92977e-15	3.99585e-14	146	P01023	A2M	Alpha-2-macroglobulin	A2MG_HUMAN	1	82.4959	1.82496	Dengue	QC	NaN	NaN	NaN	125.891	0.102505
Dengue / QC	_SVAVYGQYGGQPC[Carbamidomethyl (C)]VGNAFETQSC[Carbamidomethyl (C)]EPTRGC[Carbamidomethyl (C)]PTEEGC[Carbamidomethyl (C)]GER_	P10643	2.40481	2.40481	4.30786e-15	4.33378e-14	48	P10643	C7	Complement component C7	CO7_HUMAN	1	429.567	5.29567	Dengue	QC	NaN	NaN	NaN	40.6895	0.187832
Dengue / QC	_KGGETSEM[Oxidation (M)]YLIQPDSSVKPYR_	P02675	2.41633	2.41633	4.32829e-15	4.34664e-14	46	P02675	FGB	Fibrinogen beta chain	FIBB_HUMAN	1	433.813	5.33813	Dengue	QC	NaN	NaN	NaN	36.3156	0.188552
Dengue / QC	_AHYGGFTVQNEANKYQISVNKYR_	P02675	2.63958	2.63958	4.51896e-15	4.52214e-14	50	P02675	FGB	Fibrinogen beta chain	FIBB_HUMAN	1	523.152	6.23152	Dengue	QC	NaN	NaN	NaN	41.5577	0.218439
Dengue / QC	_EWFWDLATGTMK_	P02790	0.986843	0.986843	4.78811e-15	4.78306e-14	124	P02790	HPX	Hemopexin	HEMO_HUMAN	1	98.1844	1.98184	Dengue	QC	NaN	NaN	NaN	64.6558	0.113387
Dengue / QC	_VPAPPSPQPATYTC[Carbamidomethyl (C)]VVSHEDSR_	A0A0A0MS09;P01880;P01880-2	1.15171	1.15171	4.90206e-15	4.8848e-14	78	A0A0A0MS09;P01880;P01880-2	IGHD	Immunoglobulin heavy constant delta (Fragment);Immunoglobulin heavy constant delta;Isoform 2 of Immunoglobulin heavy constant delta	A0A0A0MS09_HUMAN;IGHD_HUMAN;IGHD_HUMAN	1	122.177	2.22177	Dengue	QC	NaN	NaN	NaN	63.7776	0.111435
Dengue / QC	_TAGYGINILGMDPLSTPFDNEFYNGLC[Carbamidomethyl (C)]NR_	P02748	0.783331	0.783331	4.90714e-15	4.8848e-14	168	P02748	C9	Complement component C9	CO9_HUMAN	1	72.1101	1.7211	Dengue	QC	NaN	NaN	NaN	126.745	0.0871563
Dengue / QC	_GEWTC[Carbamidomethyl (C)]KPIAEK_	P02751;P02751-15;P02751-3;P02751-7	0.601789	0.601789	4.98215e-15	4.95079e-14	116	P02751;P02751-15;P02751-3;P02751-7	FN1	Fibronectin;Isoform 15 of Fibronectin;Isoform 3 of Fibronectin;Isoform 7 of Fibronectin	FINC_HUMAN	1	51.7597	1.5176	Dengue	QC	NaN	NaN	NaN	110.152	0.0940711
Dengue / QC	_AVHKAVLTIDEK_	P01009	2.8744	2.8744	5.61554e-15	5.52227e-14	48	P01009	SERPINA1	Alpha-1-antitrypsin	A1AT_HUMAN	1	633.298	7.33298	Dengue	QC	NaN	NaN	NaN	40.1312	0.230765
Dengue / QC	_VEASISKANSFLGEK_	A0A140TA49	1.42254	1.42254	5.60639e-15	5.52227e-14	42	A0A140TA49	C4A	Complement C4-A	A0A140TA49_HUMAN	1	168.057	2.68057	Dengue	QC	NaN	NaN	NaN	23.2037	0.11457
Dengue / QC	_LHLETDSLALVALGALDTALYAAGSKSHKPLNMGK_	P0C0L5	1.53217	1.53217	6.09685e-15	5.94218e-14	56	P0C0L5	C4B	Complement C4-B	CO4B_HUMAN	1	189.221	2.89221	Dengue	QC	NaN	NaN	NaN	32.6992	0.226794
Dengue / QC	_AHSC[Carbamidomethyl (C)]PSVWKK_	P07225	1.09354	1.09354	6.08511e-15	5.94218e-14	96	P07225	PROS1	Vitamin K-dependent protein S	PROS_HUMAN	1	113.397	2.13397	Dengue	QC	NaN	NaN	NaN	72.0947	0.133338
Dengue / QC	_SRWQQGNIFSC[Carbamidomethyl (C)]SVM[Oxidation (M)]HEALHNR_	P01860	0.295261	0.295261	6.67086e-15	6.45949e-14	24	P01860	IGHG3	Immunoglobulin heavy constant gamma 3	IGHG3_HUMAN	1	22.7107	1.22711	Dengue	QC	NaN	NaN	NaN	16.5114	0.19523
Dengue / QC	_SLWNGDTGEC[Carbamidomethyl (C)]TDNAYIDIQLR_	P01042	1.21362	1.21362	7.09811e-15	6.8615e-14	132	P01042	KNG1	Kininogen-1	KNG1_HUMAN	1	131.919	2.31919	Dengue	QC	NaN	NaN	NaN	48.4562	0.0962067
Dengue / QC	_KVFLDC[Carbamidomethyl (C)]C[Carbamidomethyl (C)]NYITELR_	P01024	1.29369	1.29369	7.4325e-15	7.14828e-14	42	P01024	C3	Complement C3	CO3_HUMAN	1	145.154	2.45154	Dengue	QC	NaN	NaN	NaN	34.3954	0.0878613
Dengue / QC	_C[Carbamidomethyl (C)]IEGTC[Carbamidomethyl (C)]VC[Carbamidomethyl (C)]KLPYQC[Carbamidomethyl (C)]PK_	E7ETH0;G3XAM2;P05156	2.64296	2.64296	7.56369e-15	7.24992e-14	48	E7ETH0;G3XAM2;P05156	CFI	Complement factor I	E7ETH0_HUMAN;G3XAM2_HUMAN;CFAI_HUMAN	1	524.613	6.24613	Dengue	QC	NaN	NaN	NaN	39.687	0.222176
Dengue / QC	_VTFHNKGAYPLSIEPIGVR_	P00450	1.98864	1.98864	7.69994e-15	7.36809e-14	96	P00450	CP	Ceruloplasmin	CERU_HUMAN	1	296.862	3.96862	Dengue	QC	NaN	NaN	NaN	68.8139	0.183019
Dengue / QC	_LNLVATPLFLKPGIPYPIKVQVK_	P01031	1.05463	1.05463	8.34825e-15	7.96165e-14	52	P01031	C5	Complement C5	CO5_HUMAN	1	107.718	2.07718	Dengue	QC	NaN	NaN	NaN	23.8926	0.114754
Dengue / QC	_IAQLPLTGSMSIIFFLPLK_	P36955	0.971377	0.971377	8.78319e-15	8.34844e-14	76	P36955	SERPINF1	Pigment epithelium-derived factor	PEDF_HUMAN	1	96.0711	1.96071	Dengue	QC	NaN	NaN	NaN	45.7115	0.101512
Dengue / QC	_NPSSAGSWNSGSSGPGSTGNR_	P02671	1.93412	1.93412	9.47878e-15	8.97957e-14	68	P02671	FGA	Fibrinogen alpha chain	FIBA_HUMAN	1	282.144	3.82144	Dengue	QC	NaN	NaN	NaN	62.7448	0.190755
Dengue / QC	_TLNLAQNLLAQLPEELFHPLTSLQTLK_	P22792	0.851208	0.851208	9.70821e-15	9.18161e-14	76	P22792	CPN2	Carboxypeptidase N subunit 2	CPN2_HUMAN	1	80.4011	1.80401	Dengue	QC	NaN	NaN	NaN	68.0697	0.0967262
Dengue / QC	_NIPTVNENLENYYLEVNQLEK_	P51884	0.822083	0.822083	1.02328e-14	9.66171e-14	112	P51884	LUM	Lumican	LUM_HUMAN	1	76.7957	1.76796	Dengue	QC	NaN	NaN	NaN	100.52	0.101329
Dengue / QC	_V[Acetyl (Protein N-term)]LSPADKTNVK_	P69905	1.4208	1.4208	1.10127e-14	1.03124e-13	130	P69905	HBA1	Hemoglobin subunit alpha	HBA_HUMAN	1	167.733	2.67733	Dengue	QC	NaN	NaN	NaN	102.616	0.136235
Dengue / QC	_GIETGSEDLEILPNGLAFISSGLK_	P27169	0.77728	0.77728	1.11663e-14	1.0439e-13	166	P27169	PON1	Serum paraoxonase/arylesterase 1	PON1_HUMAN	1	71.3897	1.7139	Dengue	QC	NaN	NaN	NaN	115.474	0.0816045
Dengue / QC	_DTEEEDFHVDQATTVKVPMMK_	A0A024R6I7	0.878873	0.878873	1.28836e-14	1.19853e-13	104	A0A024R6I7	SERPINA1	Alpha-1-antitrypsin	A0A024R6I7_HUMAN	1	83.8939	1.83894	Dengue	QC	NaN	NaN	NaN	90.6093	0.0905178
Dengue / QC	_VYC[Carbamidomethyl (C)]DMNTENGGWTVIQNR_	P02675	3.74286	3.74286	1.29163e-14	1.19961e-13	106	P02675	FGB	Fibrinogen beta chain	FIBB_HUMAN	1	1238.79	13.3879	Dengue	QC	NaN	NaN	NaN	70.2292	0.364047
Dengue / QC	_KWDPYKQGFGNVATNTDGK_	P02675	2.80685	2.80685	1.30653e-14	1.21147e-13	62	P02675	FGB	Fibrinogen beta chain	FIBB_HUMAN	1	599.755	6.99755	Dengue	QC	NaN	NaN	NaN	51.7155	0.237151
Dengue / QC	_FRIEDGFSLKEQLQDMGLVDLFSPEK_	P01008	1.45366	1.45366	1.32695e-14	1.2264e-13	128	P01008	SERPINC1	Antithrombin-III	ANT3_HUMAN	1	173.901	2.73901	Dengue	QC	NaN	NaN	NaN	90.1815	0.159112
Dengue / QC	_IIRSSEDPNEDIVER_	P01591	4.00856	4.00856	1.61819e-14	1.48352e-13	30	P01591	JCHAIN	Immunoglobulin J chain	IGJ_HUMAN	1	1509.52	16.0952	Dengue	QC	NaN	NaN	NaN	20.6045	0.186979
Dengue / QC	_C[Carbamidomethyl (C)]NPGTGQC[Carbamidomethyl (C)]VC[Carbamidomethyl (C)]PAGWVGEQC[Carbamidomethyl (C)]QHC[Carbamidomethyl (C)]GGR_	O75882;O75882-2	0.951919	0.951919	2.01982e-14	1.8369e-13	126	O75882;O75882-2	ATRN	Attractin;Isoform 2 of Attractin	ATRN_HUMAN	1	93.4444	1.93444	Dengue	QC	NaN	NaN	NaN	78.4262	0.103485
Dengue / QC	_C[Carbamidomethyl (C)]STSSLLEAC[Carbamidomethyl (C)]TFRRP_	P02787	3.71128	3.71128	2.06732e-14	1.8771e-13	100	P02787	TF	Serotransferrin	TRFE_HUMAN	1	1209.8	13.098	Dengue	QC	NaN	NaN	NaN	66.8154	0.339078
Dengue / QC	_AQYVLISPEASSR_	P80108	0.397061	0.397061	2.15786e-14	1.95618e-13	168	P80108	GPLD1	Phosphatidylinositol-glycan-specific phospholipase D	PHLD_HUMAN	1	31.6822	1.31682	Dengue	QC	NaN	NaN	NaN	130.306	0.0574622
Dengue / QC	_TENC[Carbamidomethyl (C)]AVLSGAANGK_	E9PHK0;P05452	1.57533	1.57533	2.20194e-14	1.9898e-13	24	E9PHK0;P05452	CLEC3B	Tetranectin	E9PHK0_HUMAN;TETN_HUMAN	1	198.003	2.98003	Dengue	QC	NaN	NaN	NaN	12.6662	0.188236
Dengue / QC	_QSGLYFIKPLK_	P02679	3.10832	3.10832	2.33908e-14	2.10037e-13	84	P02679	FGG	Fibrinogen gamma chain	FIBG_HUMAN	1	762.38	8.6238	Dengue	QC	NaN	NaN	NaN	59.2275	0.30014
Dengue / QC	_WEDPGKQLYNVEATSYALLALLQLKDFDFVPPVVR_	P01024	1.15397	1.15397	2.33908e-14	2.10037e-13	64	P01024	C3	Complement C3	CO3_HUMAN	1	122.525	2.22525	Dengue	QC	NaN	NaN	NaN	37.5565	0.147754
Dengue / QC	_SLLSNVEGDNAVPMQHNNRPTQPLK_	P00915	0.906634	0.906634	2.48239e-14	2.21854e-13	30	P00915	CA1	Carbonic anhydrase 1	CAH1_HUMAN	1	87.4667	1.87467	Dengue	QC	NaN	NaN	NaN	23.963	0.0687537
Dengue / QC	_EVTKEVVTSEDGSDC[Carbamidomethyl (C)]PEAM[Oxidation (M)]DLGTLSGIGTLDGFR_	P02671	4.67793	4.67793	2.61921e-14	2.32983e-13	84	P02671	FGA	Fibrinogen alpha chain	FIBA_HUMAN	1	2459.74	25.5974	Dengue	QC	NaN	NaN	NaN	64.4157	0.367201
Dengue / QC	_VWPQQPSGELFEIEIDTLETTC[Carbamidomethyl (C)]HVLDPTPVAR_	P02765	0.787838	0.787838	2.66002e-14	2.36243e-13	132	P02765	AHSG	Alpha-2-HS-glycoprotein	FETUA_HUMAN	1	72.6486	1.72649	Dengue	QC	NaN	NaN	NaN	97.2875	0.08481
Dengue / QC	_LRLEPGKEYLIMGLDGATYDLEGHPQYLLDSNSWIEEMPSER_	P0C0L5	0.954853	0.954853	2.69302e-14	2.38714e-13	162	P0C0L5	C4B	Complement C4-B	CO4B_HUMAN	1	93.8382	1.93838	Dengue	QC	NaN	NaN	NaN	108.462	0.132281
Dengue / QC	_GSWYSMR_	P02675	3.02088	3.02088	2.80222e-14	2.47711e-13	108	P02675	FGB	Fibrinogen beta chain	FIBB_HUMAN	1	711.662	8.11662	Dengue	QC	NaN	NaN	NaN	77.9545	0.310945
Dengue / QC	_IDQTVEELR_	P06727	1.4751	1.4751	3.15925e-14	2.78838e-13	72	P06727	APOA4	Apolipoprotein A-IV	APOA4_HUMAN	1	178.004	2.78004	Dengue	QC	NaN	NaN	NaN	53.3642	0.151901
Dengue / QC	_DLLPSRDR_	P02671	3.10077	3.10077	3.20922e-14	2.82372e-13	72	P02671	FGA	Fibrinogen alpha chain	FIBA_HUMAN	1	757.879	8.57879	Dengue	QC	NaN	NaN	NaN	57.8297	0.274004
Dengue / QC	_RLWWLDLKSGAQATWTELPWPHEK_	P02790	1.10878	1.10878	3.72471e-14	3.24712e-13	160	P02790	HPX	Hemopexin	HEMO_HUMAN	1	115.664	2.15664	Dengue	QC	NaN	NaN	NaN	151.945	0.1156
Dengue / QC	_C[Carbamidomethyl (C)]PAPELLGGPSVFLFPPKPKDTLMISR_	P01860	3.82276	3.82276	3.99619e-14	3.46784e-13	36	P01860	IGHG3	Immunoglobulin heavy constant gamma 3	IGHG3_HUMAN	1	1315.03	14.1503	Dengue	QC	NaN	NaN	NaN	26.0519	0.240893
Dengue / QC	_DYELLC[Carbamidomethyl (C)]LDGTRK_	P02787	2.01026	2.01026	4.26643e-14	3.6743e-13	76	P02787	TF	Serotransferrin	TRFE_HUMAN	1	302.856	4.02856	Dengue	QC	NaN	NaN	NaN	40.8887	0.174613
Dengue / QC	_GSFSTTVTGR_	P08519	1.58783	1.58783	4.32969e-14	3.71752e-13	136	P08519	LPA	Apolipoprotein(a)	APOA_HUMAN	1	200.597	3.00597	Dengue	QC	NaN	NaN	NaN	123.156	0.189827
Dengue / QC	_WQQGNIFSC[Carbamidomethyl (C)]SVMHEALHNRFTQK_	P01860	1.50977	1.50977	4.49201e-14	3.85107e-13	94	P01860	IGHG3	Immunoglobulin heavy constant gamma 3	IGHG3_HUMAN	1	184.765	2.84765	Dengue	QC	NaN	NaN	NaN	72.5285	0.147039
Dengue / QC	_SPLFMGKVVNPTQK_	P01009	2.63267	2.63267	4.64901e-14	3.97368e-13	60	P01009	SERPINA1	Alpha-1-antitrypsin	A1AT_HUMAN	1	520.172	6.20172	Dengue	QC	NaN	NaN	NaN	47.9302	0.213017
Dengue / QC	_FDEYFSQSC[Carbamidomethyl (C)]APGSDPR_	E7ER44;P02788	1.49108	1.49108	4.69928e-14	4.00461e-13	26	E7ER44;P02788	LTF	Lactotransferrin	E7ER44_HUMAN;TRFL_HUMAN	1	181.1	2.811	Dengue	QC	NaN	NaN	NaN	14.3036	0.29411
Dengue / QC	_GKSAGLVK_	Q14624	4.17472	4.17472	5.35558e-14	4.50979e-13	36	Q14624	ITIH4	Inter-alpha-trypsin inhibitor heavy chain H4	ITIH4_HUMAN	1	1706	18.06	Dengue	QC	NaN	NaN	NaN	23.1285	0.166655
Dengue / QC	_NSLFFSAQPFEITASTNNEGNLK_	P04114	0.685417	0.685417	5.5546e-14	4.65669e-13	96	P04114	APOB	Apolipoprotein B-100	APOB_HUMAN	1	60.8167	1.60817	Dengue	QC	NaN	NaN	NaN	67.3692	0.106086
Dengue / QC	_MDYKGDATVFFILPNQGK_	P29622	0.590212	0.590212	5.68659e-14	4.76032e-13	146	P29622	SERPINA4	Kallistatin	KAIN_HUMAN	1	50.5468	1.50547	Dengue	QC	NaN	NaN	NaN	83.4767	0.0724683
Dengue / QC	_QMPGKGLEWMGR_	A0A0J9YXX1	0.556598	0.556598	5.7316e-14	4.79094e-13	36	A0A0J9YXX1	IGHV5-10-1	Immunoglobulin heavy variable 5-10-1	HV5X1_HUMAN	1	47.0797	1.4708	Dengue	QC	NaN	NaN	NaN	27.5511	0.0563259
Dengue / QC	_RYTIAALLSPYSYSTTAVVTNPK_	P02766	0.501384	0.501384	5.88635e-14	4.90587e-13	164	P02766	TTR	Transthyretin	TTHY_HUMAN	1	41.5571	1.41557	Dengue	QC	NaN	NaN	NaN	139.195	0.0730346
Dengue / QC	_YLGEEYVKAVGNLRK_	P02787	2.31522	2.31522	6.33834e-14	5.25943e-13	126	P02787	TF	Serotransferrin	TRFE_HUMAN	1	397.682	4.97682	Dengue	QC	NaN	NaN	NaN	91.2767	0.243817
Dengue / QC	_C[Carbamidomethyl (C)]FDHAAGTSYVVGETWEKPYQGWMMVDC[Carbamidomethyl (C)]TC[Carbamidomethyl (C)]LGEGSGR_	P02751;P02751-15;P02751-3;P02751-7	1.64525	1.64525	6.62779e-14	5.49062e-13	54	P02751;P02751-15;P02751-3;P02751-7	FN1	Fibronectin;Isoform 15 of Fibronectin;Isoform 3 of Fibronectin;Isoform 7 of Fibronectin	FINC_HUMAN	1	212.803	3.12803	Dengue	QC	NaN	NaN	NaN	42.13	0.147429
Dengue / QC	_GAVYVYFGSK_	P80108	0.928276	0.928276	7.25177e-14	5.95651e-13	72	P80108	GPLD1	Phosphatidylinositol-glycan-specific phospholipase D	PHLD_HUMAN	1	90.3001	1.903	Dengue	QC	NaN	NaN	NaN	33.2401	0.11774
Dengue / QC	_NFATSNKM[Oxidation (M)]DMTFSK_	P04114	1.1877	1.1877	7.31161e-14	5.997e-13	38	P04114	APOB	Apolipoprotein B-100	APOB_HUMAN	1	127.79	2.2779	Dengue	QC	NaN	NaN	NaN	22.4323	0.0846499
Dengue / QC	_GATLALTQVTPQDER_	P43121	1.23036	1.23036	7.67852e-14	6.27982e-13	72	P43121	MCAM	Cell surface glycoprotein MUC18	MUC18_HUMAN	1	134.625	2.34625	Dengue	QC	NaN	NaN	NaN	51.1315	0.128356
Dengue / QC	_IYEDHDATQQLQGFYSQVAKPLLVDVDLQYPQDAVLALTQNHHK_	P19827	0.729832	0.729832	8.75692e-14	7.08028e-13	174	P19827	ITIH1	Inter-alpha-trypsin inhibitor heavy chain H1	ITIH1_HUMAN	1	65.8447	1.65845	Dengue	QC	NaN	NaN	NaN	139.949	0.0768655
Dengue / QC	_AKGQPREPQVYTLPPSQEEMTK_	P01861	1.0832	1.0832	9.26645e-14	7.46156e-13	158	P01861	IGHG4	Immunoglobulin heavy constant gamma 4	IGHG4_HUMAN	1	111.873	2.11873	Dengue	QC	NaN	NaN	NaN	141.195	0.120131
Dengue / QC	_NIFISPVSISMALAMLSLGTC[Carbamidomethyl (C)]GHTR_	P08185	0.72688	0.72688	9.26787e-14	7.46156e-13	136	P08185	SERPINA6	Corticosteroid-binding globulin	CBG_HUMAN	1	65.5056	1.65506	Dengue	QC	NaN	NaN	NaN	120.808	0.0898874
Dengue / QC	_TLAFPLTIR_	A0A0U1RQQ4;Q9UNN8	0.640686	0.640686	9.76183e-14	7.83704e-13	70	A0A0U1RQQ4;Q9UNN8	PROCR	Endothelial protein C receptor (Fragment);Endothelial protein C receptor	A0A0U1RQQ4_HUMAN;EPCR_HUMAN	1	55.907	1.55907	Dengue	QC	NaN	NaN	NaN	44.5888	0.099691
Dengue / QC	_REEAPSLRPAPPPISGGGYR_	P02675	3.44249	3.44249	1.0185e-13	8.14225e-13	74	P02675	FGB	Fibrinogen beta chain	FIBB_HUMAN	1	987.158	10.8716	Dengue	QC	NaN	NaN	NaN	58.1172	0.299565
Dengue / QC	_NNNEKDM[Oxidation (M)]ALTAFVLISLQEAK_	P01024	-1.27822	1.27822	1.13676e-13	9.03683e-13	26	P01024	C3	Complement C3	CO3_HUMAN	1	-58.7695	0.412305	Dengue	QC	NaN	NaN	NaN	11.5952	0.194406
Dengue / QC	_KMTVTDQVNC[Carbamidomethyl (C)]PKLS_	P05090	3.169	3.169	1.14892e-13	9.09539e-13	28	P05090	APOD	Apolipoprotein D	APOD_HUMAN	1	799.424	8.99424	Dengue	QC	NaN	NaN	NaN	18.9169	0.171962
Dengue / QC	_DPDQTDGLGLSYLSSHIANVER_	P06396	1.65375	1.65375	1.16826e-13	9.23562e-13	38	P06396	GSN	Gelsolin	GELS_HUMAN	1	214.65	3.1465	Dengue	QC	NaN	NaN	NaN	23.447	0.126972
Dengue / QC	_TGDTIEFMC[Carbamidomethyl (C)]K_	Q92496;Q92496-2	1.60548	1.60548	1.17854e-13	9.30395e-13	34	Q92496;Q92496-2	CFHR4	Complement factor H-related protein 4;Isoform 2 of Complement factor H-related protein 4	FHR4_HUMAN	1	204.297	3.04297	Dengue	QC	NaN	NaN	NaN	27.2904	0.197767
Dengue / QC	_LLNNWDVC[Carbamidomethyl (C)]ADMVGTFTDTEDPAKFK_	P02753;Q5VY30	0.862406	0.862406	1.18311e-13	9.31957e-13	124	P02753;Q5VY30	RBP4	Retinol-binding protein 4;Retinol binding protein 4, plasma, isoform CRA_b	RET4_HUMAN;Q5VY30_HUMAN	1	81.8068	1.81807	Dengue	QC	NaN	NaN	NaN	100.22	0.100015
Dengue / QC	_QGFGNVATNTDGK_	P02675	2.53322	2.53322	1.21354e-13	9.53223e-13	114	P02675	FGB	Fibrinogen beta chain	FIBB_HUMAN	1	478.86	5.7886	Dengue	QC	NaN	NaN	NaN	76.0393	0.285723
Dengue / QC	_ATEVPVSWESFNNGDC[Carbamidomethyl (C)]FILDLGNNIHQWC[Carbamidomethyl (C)]GSNSNRYER_	P06396	1.37854	1.37854	1.21417e-13	9.53223e-13	60	P06396	GSN	Gelsolin	GELS_HUMAN	1	160.005	2.60005	Dengue	QC	NaN	NaN	NaN	26.2018	0.121221
Dengue / QC	_LEALPNSLLAPLGR_	P35858;P35858-2	0.552451	0.552451	1.22531e-13	9.60643e-13	76	P35858;P35858-2	IGFALS	Insulin-like growth factor-binding protein complex acid labile subunit;Isoform 2 of Insulin-like growth factor-binding protein complex acid labile subunit	ALS_HUMAN	1	46.6576	1.46658	Dengue	QC	NaN	NaN	NaN	59.8491	0.0841261
Dengue / QC	_VQLSNDFDEYIMAIEQTIKSGSDEVQVGQQR_	P01024	3.29838	3.29838	1.29067e-13	1.00771e-12	56	P01024	C3	Complement C3	CO3_HUMAN	1	883.812	9.83812	Dengue	QC	NaN	NaN	NaN	37.9898	0.309375
Dengue / QC	_LSFYYLIMAK_	P01023	0.947401	0.947401	1.30475e-13	1.01731e-12	118	P01023	A2M	Alpha-2-macroglobulin	A2MG_HUMAN	1	92.8395	1.9284	Dengue	QC	NaN	NaN	NaN	99.6469	0.131144
Dengue / QC	_TFSEWLESVKENPAVIDFELAPIVDLVR_	P13671	1.27249	1.27249	1.31856e-13	1.02667e-12	70	P13671	C6	Complement component C6	CO6_HUMAN	1	141.578	2.41578	Dengue	QC	NaN	NaN	NaN	53.914	0.139054
Dengue / QC	_LKHLIVTPSGC[Carbamidomethyl (C)]GEQNMIGMTPTVIAVHYLDETEQWEK_	P01024	0.659897	0.659897	1.40752e-13	1.09145e-12	124	P01024	C3	Complement C3	CO3_HUMAN	1	57.997	1.57997	Dengue	QC	NaN	NaN	NaN	73.4965	0.0678353
Dengue / QC	_PGMPFDLMVFVTNPDGSPAYR_	P01024	1.02704	1.02704	1.42787e-13	1.10572e-12	58	P01024	C3	Complement C3	CO3_HUMAN	1	103.784	2.03784	Dengue	QC	NaN	NaN	NaN	45.3557	0.124119
Dengue / QC	_EYGVVLAPDGSTVAVEPLLAGLEAGLQGR_	Q96PD5	0.741103	0.741103	1.46849e-13	1.13409e-12	172	Q96PD5	PGLYRP2	N-acetylmuramoyl-L-alanine amidase	PGRP2_HUMAN	1	67.1453	1.67145	Dengue	QC	NaN	NaN	NaN	113.968	0.0772469
Dengue / QC	_QVLLVGAPTYDDVSK_	P80108	0.766814	0.766814	1.49956e-13	1.15651e-12	52	P80108	GPLD1	Phosphatidylinositol-glycan-specific phospholipase D	PHLD_HUMAN	1	70.1508	1.70151	Dengue	QC	NaN	NaN	NaN	28.0015	0.0937084
Dengue / QC	_LELELRPTGEIEQYSVSATYELQR_	P04114	0.806691	0.806691	1.52134e-13	1.17013e-12	146	P04114	APOB	Apolipoprotein B-100	APOB_HUMAN	1	74.9195	1.7492	Dengue	QC	NaN	NaN	NaN	116.549	0.0914458
Dengue / QC	_DFGTHYITEAVLGGIYEYTLVMNK_	P07358	1.4474	1.4474	1.53937e-13	1.17921e-12	48	P07358	C8B	Complement component C8 beta chain	CO8B_HUMAN	1	172.717	2.72717	Dengue	QC	NaN	NaN	NaN	40.964	0.133382
Dengue / QC	_VAQLEAQC[Carbamidomethyl (C)]QEPC[Carbamidomethyl (C)]KDTVQIHDITGK_	P02679	2.56286	2.56286	1.54703e-13	1.18349e-12	100	P02679	FGG	Fibrinogen gamma chain	FIBG_HUMAN	1	490.88	5.9088	Dengue	QC	NaN	NaN	NaN	80.5723	0.27053
Dengue / QC	_VHVSEEGTEPEAMLQVLGPKPALPAGTEDTAK_	P06396	1.83673	1.83673	1.6408e-13	1.25353e-12	32	P06396	GSN	Gelsolin	GELS_HUMAN	1	257.201	3.57201	Dengue	QC	NaN	NaN	NaN	22.5907	0.108547
Dengue / QC	_YVM[Oxidation (M)]LPVADQYDC[Carbamidomethyl (C)]ITHYEGSTC[Carbamidomethyl (C)]PK_	P00739	1.34738	1.34738	1.71745e-13	1.30858e-12	58	P00739	HPR	Haptoglobin-related protein	HPTR_HUMAN	1	154.449	2.54449	Dengue	QC	NaN	NaN	NaN	51.9485	0.166739
Dengue / QC	_QGDVEC[Carbamidomethyl (C)]QRTEC[Carbamidomethyl (C)]IKPVVQEVLTITPFQR_	P13671	4.39206	4.39206	1.75439e-13	1.3296e-12	32	P13671	C6	Complement component C6	CO6_HUMAN	1	1999.62	20.9962	Dengue	QC	NaN	NaN	NaN	21.6807	0.253592
Dengue / QC	_ELISLVEDVSSNYDGC[Carbamidomethyl (C)]C[Carbamidomethyl (C)]EGDVVQC[Carbamidomethyl (C)]IR_	P43652	1.33683	1.33683	1.76313e-13	1.33444e-12	64	P43652	AFM	Afamin	AFAM_HUMAN	1	152.595	2.52595	Dengue	QC	NaN	NaN	NaN	43.6792	0.115256
Dengue / QC	_MKFAC[Carbamidomethyl (C)]YYPR_	P0C0L5	1.86628	1.86628	1.81015e-13	1.36277e-12	66	P0C0L5	C4B	Complement C4-B	CO4B_HUMAN	1	264.591	3.64591	Dengue	QC	NaN	NaN	NaN	50.4226	0.222856
Dengue / QC	_QSNNKYAASSYLSLTPEQWKSHR_	P0DOY2	3.38741	3.38741	2.02244e-13	1.51257e-12	78	P0DOY2	IGLC2	Immunoglobulin lambda constant 2	IGLC2_HUMAN	1	946.434	10.4643	Dengue	QC	NaN	NaN	NaN	59.3441	0.309932
Dengue / QC	_AGAAPYVQAFDSLLAGPVAEYLK_	Q01518;Q5T0R1;Q5T0R2;Q5T0R3;Q5T0R4;Q5T0R5;Q5T0R6;Q5T0R7	1.30586	1.30586	2.06859e-13	1.54303e-12	40	Q01518;Q5T0R1;Q5T0R2;Q5T0R3;Q5T0R4;Q5T0R5;Q5T0R6;Q5T0R7	CAP1	Adenylyl cyclase-associated protein 1;Adenylyl cyclase-associated protein 1 (Fragment);Adenylyl cyclase-associated protein 1 (Fragment);Adenylyl cyclase-associated protein 1 (Fragment);Adenylyl cyclase-associated protein 1 (Fragment);Adenylyl cyclase-associated protein 1 (Fragment);Adenylyl cyclase-associated protein 1 (Fragment);Adenylyl cyclase-associated protein 1 (Fragment)	CAP1_HUMAN;Q5T0R1_HUMAN;Q5T0R2_HUMAN;Q5T0R3_HUMAN;Q5T0R4_HUMAN;Q5T0R5_HUMAN;Q5T0R6_HUMAN;Q5T0R7_HUMAN	1	147.231	2.47231	Dengue	QC	NaN	NaN	NaN	29.9626	0.131889
Dengue / QC	_VQQNVPSGTDTGDPQSKPLGDWAAGTMDPESSIFIEDAIK_	O14791;O14791-2	0.728693	0.728693	2.11737e-13	1.57322e-12	94	O14791;O14791-2	APOL1	Apolipoprotein L1;Isoform 2 of Apolipoprotein L1	APOL1_HUMAN	1	65.7137	1.65714	Dengue	QC	NaN	NaN	NaN	73.449	0.0973071
Dengue / QC	_IKKWLTFSLGK_	P11226	1.7204	1.7204	2.18467e-13	1.61688e-12	44	P11226	MBL2	Mannose-binding protein C	MBL2_HUMAN	1	229.529	3.29529	Dengue	QC	NaN	NaN	NaN	33.1689	0.148623
Dengue / QC	_TPKSPVGVQPILNEHTFC[Carbamidomethyl (C)]AGMSK_	P00738	2.92301	2.92301	2.38488e-13	1.76048e-12	96	P00738	HP	Haptoglobin	HPT_HUMAN	1	658.428	7.58428	Dengue	QC	NaN	NaN	NaN	56.8335	0.295491
Dengue / QC	_TVMVNIENPEGIPVKQDSLSSQNQLGVLPLSWDIPELVNMGQWK_	P01024	0.956102	0.956102	2.41151e-13	1.77323e-12	172	P01024	C3	Complement C3	CO3_HUMAN	1	94.0061	1.94006	Dengue	QC	NaN	NaN	NaN	79.2492	0.112742
Dengue / QC	_HYDGSYSTFGERYGR_	P01023	3.99961	3.99961	2.42358e-13	1.7775e-12	50	P01023	A2M	Alpha-2-macroglobulin	A2MG_HUMAN	1	1499.56	15.9956	Dengue	QC	NaN	NaN	NaN	35.64	0.300734
Dengue / QC	_VSNQTLSLFFTVLQDVPVR_	P01023	0.936951	0.936951	2.59105e-13	1.89057e-12	80	P01023	A2M	Alpha-2-macroglobulin	A2MG_HUMAN	1	91.4477	1.91448	Dengue	QC	NaN	NaN	NaN	53.1773	0.111986
Dengue / QC	_C[Carbamidomethyl (C)]YFPYLENGYNQNYGR_	P08603	0.684913	0.684913	2.85387e-13	2.06379e-12	96	P08603	CFH	Complement factor H	CFAH_HUMAN	1	60.7605	1.6076	Dengue	QC	NaN	NaN	NaN	70.7035	0.0716682
Dengue / QC	_NTVLVLNTQSLVFVQTDKPMYKPGQTVR_	P20742	3.22061	3.22061	2.93969e-13	2.11777e-12	42	P20742	PZP	Pregnancy zone protein	PZP_HUMAN	1	832.181	9.32181	Dengue	QC	NaN	NaN	NaN	32.6298	0.291176
Dengue / QC	_FDEFFSEGC[Carbamidomethyl (C)]APGSKKDSSLC[Carbamidomethyl (C)]K_	P02787	1.82304	1.82304	2.9614e-13	2.13071e-12	42	P02787	TF	Serotransferrin	TRFE_HUMAN	1	253.825	3.53825	Dengue	QC	NaN	NaN	NaN	36.286	0.175988
Dengue / QC	_ITTGGDVINNGLWNMVSVEELEHSISIK_	P07225	0.733663	0.733663	2.98453e-13	2.14193e-12	138	P07225	PROS1	Vitamin K-dependent protein S	PROS_HUMAN	1	66.2856	1.66286	Dengue	QC	NaN	NaN	NaN	119.192	0.0916478
Dengue / QC	_NIQEYLSILTDPDGKGK_	P04114	0.525114	0.525114	2.98224e-13	2.14193e-12	48	P04114	APOB	Apolipoprotein B-100	APOB_HUMAN	1	43.9048	1.43905	Dengue	QC	NaN	NaN	NaN	35.4894	0.0933294
Dengue / QC	_AINEKLGQYASPTAKR_	P0C0L5	2.74661	2.74661	3.1811e-13	2.27153e-12	48	P0C0L5	C4B	Complement C4-B	CO4B_HUMAN	1	571.139	6.71139	Dengue	QC	NaN	NaN	NaN	37.1905	0.24436
Dengue / QC	_GNLLQC[Carbamidomethyl (C)]IC[Carbamidomethyl (C)]TGNGRGEWK_	P02751;P02751-15;P02751-3;P02751-7	1.46016	1.46016	3.3999e-13	2.41865e-12	56	P02751;P02751-15;P02751-3;P02751-7	FN1	Fibronectin;Isoform 15 of Fibronectin;Isoform 3 of Fibronectin;Isoform 7 of Fibronectin	FINC_HUMAN	1	175.138	2.75138	Dengue	QC	NaN	NaN	NaN	49.0831	0.164872
Dengue / QC	_SFAAGIQALGGTNINDAMLMAVQLLDSSNQEER_	Q14624	0.97041	0.97041	3.41759e-13	2.4282e-12	128	Q14624	ITIH4	Inter-alpha-trypsin inhibitor heavy chain H4	ITIH4_HUMAN	1	95.9397	1.9594	Dengue	QC	NaN	NaN	NaN	31.3746	0.0828661
Dengue / QC	_KTDELPQLVTLPHPNLHGPEILDVPSTVQK_	P02751;P02751-15;P02751-3;P02751-7	3.20504	3.20504	3.55267e-13	2.51788e-12	32	P02751;P02751-15;P02751-3;P02751-7	FN1	Fibronectin;Isoform 15 of Fibronectin;Isoform 3 of Fibronectin;Isoform 7 of Fibronectin	FINC_HUMAN	1	822.172	9.22172	Dengue	QC	NaN	NaN	NaN	18.5443	0.120396
Dengue / QC	_LDGSVDFKK_	P02679	3.06069	3.06069	3.82976e-13	2.70415e-12	24	P02679	FGG	Fibrinogen gamma chain	FIBG_HUMAN	1	734.37	8.3437	Dengue	QC	NaN	NaN	NaN	19.2961	0.156941
Dengue / QC	_YTIAALLSPYSYSTTAVVTNPK_	P02766	0.949271	0.949271	3.83461e-13	2.70421e-12	74	P02766	TTR	Transthyretin	TTHY_HUMAN	1	93.0897	1.9309	Dengue	QC	NaN	NaN	NaN	38.3995	0.0874718
Dengue / QC	_HGTDDGVVWM[Oxidation (M)]NWK_	P02675	2.79169	2.79169	3.84114e-13	2.70546e-12	36	P02675	FGB	Fibrinogen beta chain	FIBB_HUMAN	1	592.443	6.92443	Dengue	QC	NaN	NaN	NaN	31.621	0.223408
Dengue / QC	_QDSLSSQNQLGVLPLSWDIPELVNM[Oxidation (M)]GQWK_	P01024	0.95197	0.95197	3.99146e-13	2.80092e-12	54	P01024	C3	Complement C3	CO3_HUMAN	1	93.4512	1.93451	Dengue	QC	NaN	NaN	NaN	44.6915	0.090383
Dengue / QC	_GGETSEM[Oxidation (M)]YLIQPDSSVKPYR_	P02675	4.57294	4.57294	4.05132e-13	2.83592e-12	48	P02675	FGB	Fibrinogen beta chain	FIBB_HUMAN	1	2280.08	23.8008	Dengue	QC	NaN	NaN	NaN	29.108	0.35442
Dengue / QC	_MEPFHFKNSVIKVPMMNSK_	P05155;P05155-3	1.87604	1.87604	4.11841e-13	2.87934e-12	94	P05155;P05155-3	SERPING1	Plasma protease C1 inhibitor;Isoform 3 of Plasma protease C1 inhibitor	IC1_HUMAN	1	267.067	3.67067	Dengue	QC	NaN	NaN	NaN	74.6222	0.184431
Dengue / QC	_NLC[Carbamidomethyl (C)]EAMENFMQQLK_	P20851;P20851-2	1.77883	1.77883	4.15241e-13	2.89955e-12	38	P20851;P20851-2	C4BPB	C4b-binding protein beta chain;Isoform 2 of C4b-binding protein beta chain	C4BPB_HUMAN	1	243.147	3.43147	Dengue	QC	NaN	NaN	NaN	16.0234	0.201549
Dengue / QC	_GTLSTTITGR_	P08519	1.3945	1.3945	4.25963e-13	2.95987e-12	108	P08519	LPA	Apolipoprotein(a)	APOA_HUMAN	1	162.898	2.62898	Dengue	QC	NaN	NaN	NaN	78.7305	0.158555
Dengue / QC	_MGPSSAVPGDSMQLAITGGNEEGFFTTR_	P23142-4	1.14208	1.14208	4.45188e-13	3.08215e-12	110	P23142-4	FBLN1	Isoform C of Fibulin-1	FBLN1_HUMAN	1	120.699	2.20699	Dengue	QC	NaN	NaN	NaN	87.3438	0.138941
Dengue / QC	_LSPIYNLVPVK_	P02748	-0.651102	0.651102	4.59551e-13	3.17001e-12	158	P02748	C9	Complement component C9	CO9_HUMAN	1	-36.3206	0.636794	Dengue	QC	NaN	NaN	NaN	93.4703	0.07707
Dengue / QC	_VINLPLDSMAAPWETGDTFPDVVAIAPDVR_	Q96PD5	0.787914	0.787914	4.98852e-13	3.42449e-12	134	Q96PD5	PGLYRP2	N-acetylmuramoyl-L-alanine amidase	PGRP2_HUMAN	1	72.6577	1.72658	Dengue	QC	NaN	NaN	NaN	117.013	0.0854986
Dengue / QC	_ETYDFDIAVLR_	P00742	0.793391	0.793391	5.09934e-13	3.48614e-12	134	P00742	F10	Coagulation factor X	FA10_HUMAN	1	73.3144	1.73314	Dengue	QC	NaN	NaN	NaN	65.2623	0.0914369
Dengue / QC	_LWAYLTIQELLAKR_	P19827	0.530598	0.530598	5.26006e-13	3.58491e-12	104	P19827	ITIH1	Inter-alpha-trypsin inhibitor heavy chain H1	ITIH1_HUMAN	1	44.4528	1.44453	Dengue	QC	NaN	NaN	NaN	74.9038	0.12926
Dengue / QC	_GVYSSDVFDIFPGTYQTLEMFPR_	P00450	0.619787	0.619787	5.38416e-13	3.66071e-12	176	P00450	CP	Ceruloplasmin	CERU_HUMAN	1	53.6648	1.53665	Dengue	QC	NaN	NaN	NaN	88.6842	0.0805553
Dengue / QC	_IADVTSGLIGGEDGR_	P80108	0.365316	0.365316	5.54873e-13	3.7681e-12	158	P80108	GPLD1	Phosphatidylinositol-glycan-specific phospholipase D	PHLD_HUMAN	1	28.8164	1.28816	Dengue	QC	NaN	NaN	NaN	146.772	0.057621
Dengue / QC	_FTDHLKYVMLPVADQDQC[Carbamidomethyl (C)]IR_	P00738	2.81533	2.81533	5.58229e-13	3.78185e-12	72	P00738	HP	Haptoglobin	HPT_HUMAN	1	603.881	7.03881	Dengue	QC	NaN	NaN	NaN	54.1854	0.335464
Dengue / QC	_DLLYIGK_	B4E1Z4	0.93675	0.93675	5.81001e-13	3.9221e-12	66	B4E1Z4	NaN	cDNA FLJ55673, highly similar to Complement factor B (EC 3.4.21.47)	B4E1Z4_HUMAN	1	91.4211	1.91421	Dengue	QC	NaN	NaN	NaN	42.2036	0.106917
Dengue / QC	_KWQEEM[Oxidation (M)]ELYR_	P02647	0.686126	0.686126	5.92549e-13	3.99058e-12	100	P02647	APOA1	Apolipoprotein A-I	APOA1_HUMAN	1	60.8957	1.60896	Dengue	QC	NaN	NaN	NaN	87.3555	0.0728015
Dengue / QC	_LGNGVQC[Carbamidomethyl (C)]LAMGWGLLGR_	P08246	2.38172	2.38172	6.69632e-13	4.48314e-12	20	P08246	ELANE	Neutrophil elastase	ELNE_HUMAN	1	421.158	5.21158	Dengue	QC	NaN	NaN	NaN	13.413	0.188004
Dengue / QC	_TC[Carbamidomethyl (C)]QSWSSMTPHWHQR_	P08519	2.6419	2.6419	6.76035e-13	4.52069e-12	60	P08519	LPA	Apolipoprotein(a)	APOA_HUMAN	1	524.151	6.24151	Dengue	QC	NaN	NaN	NaN	49.4171	0.234561
Dengue / QC	_C[Carbamidomethyl (C)]EAC[Carbamidomethyl (C)]PPGYSGPTHQGVGLAFAK_	G3XAP6;P49747	1.54398	1.54398	6.97697e-13	4.64913e-12	38	G3XAP6;P49747	COMP	Cartilage oligomeric matrix protein	G3XAP6_HUMAN;COMP_HUMAN	1	191.597	2.91597	Dengue	QC	NaN	NaN	NaN	31.8647	0.185239
Dengue / QC	_GGSTSYGTGSETESPRNPSSAGSWNSGSSGPGSTGNR_	P02671	2.50462	2.50462	7.057e-13	4.69695e-12	70	P02671	FGA	Fibrinogen alpha chain	FIBA_HUMAN	1	467.501	5.67501	Dengue	QC	NaN	NaN	NaN	62.422	0.254731
Dengue / QC	_LHLDYIGPC[Carbamidomethyl (C)]K_	P09486	0.744665	0.744665	7.20263e-13	4.78268e-12	60	P09486	SPARC	SPARC	SPRC_HUMAN	1	67.5585	1.67558	Dengue	QC	NaN	NaN	NaN	49.0814	0.100238
Dengue / QC	_YEVSVYALKDTLTSRPAQGVVTTLENVSPPR_	P02751;P02751-15;P02751-3;P02751-7	1.30771	1.30771	7.32167e-13	4.85605e-12	56	P02751;P02751-15;P02751-3;P02751-7	FN1	Fibronectin;Isoform 15 of Fibronectin;Isoform 3 of Fibronectin;Isoform 7 of Fibronectin	FINC_HUMAN	1	147.548	2.47548	Dengue	QC	NaN	NaN	NaN	30.9867	0.141959
Dengue / QC	_TPENYPNAGLTMNYC[Carbamidomethyl (C)]RNPDADKGPWC[Carbamidomethyl (C)]FTTDPSVR_	P00747	1.51275	1.51275	7.43474e-13	4.9253e-12	76	P00747	PLG	Plasminogen	PLMN_HUMAN	1	185.353	2.85353	Dengue	QC	NaN	NaN	NaN	66.3288	0.171499
Dengue / QC	_RVELKTPLGDTTHTC[Carbamidomethyl (C)]PR_	P01860	3.32191	3.32191	7.66146e-13	5.06958e-12	58	P01860	IGHG3	Immunoglobulin heavy constant gamma 3	IGHG3_HUMAN	1	899.99	9.9999	Dengue	QC	NaN	NaN	NaN	41.3632	0.309872
Dengue / QC	_VKEGMNIVEAMER_	P62937	0.797446	0.797446	7.89428e-13	5.21151e-12	68	P62937	PPIA	Peptidyl-prolyl cis-trans isomerase A	PPIA_HUMAN	1	73.8021	1.73802	Dengue	QC	NaN	NaN	NaN	61.0634	0.0727664
Dengue / QC	_QC[Carbamidomethyl (C)]QDLGAFTESMVVFGC[Carbamidomethyl (C)]PN_	P01024	0.915822	0.915822	8.5239e-13	5.61862e-12	142	P01024	C3	Complement C3	CO3_HUMAN	1	88.6643	1.88664	Dengue	QC	NaN	NaN	NaN	77.4465	0.085772
Dengue / QC	_ELLALIQLER_	Q16610	0.851542	0.851542	8.68569e-13	5.71406e-12	162	Q16610	ECM1	Extracellular matrix protein 1	ECM1_HUMAN	1	80.4428	1.80443	Dengue	QC	NaN	NaN	NaN	129.947	0.0983787
Dengue / QC	_TMTIHNGMFFSTYDRDNDGWLTSDPR_	P02675	3.12735	3.12735	9.07038e-13	5.94649e-12	30	P02675	FGB	Fibrinogen beta chain	FIBB_HUMAN	1	773.83	8.7383	Dengue	QC	NaN	NaN	NaN	21.9751	0.192791
Dengue / QC	_SASDLTWDNLKGKK_	P02787	3.62521	3.62521	9.16017e-13	5.99381e-12	66	P02787	TF	Serotransferrin	TRFE_HUMAN	1	1133.95	12.3395	Dengue	QC	NaN	NaN	NaN	41.8621	0.329675
Dengue / QC	_IPLYYPNAGLTR_	P08519	1.56508	1.56508	9.32863e-13	6.09471e-12	84	P08519	LPA	Apolipoprotein(a)	APOA_HUMAN	1	195.894	2.95894	Dengue	QC	NaN	NaN	NaN	60.0376	0.18435
Dengue / QC	_SQLQKVPPEWK_	P02671	4.01702	4.01702	1.02216e-12	6.63997e-12	22	P02671	FGA	Fibrinogen alpha chain	FIBA_HUMAN	1	1518.99	16.1899	Dengue	QC	NaN	NaN	NaN	17.1103	0.197885
Dengue / QC	_APQLRETLLQDFR_	P02760	1.45642	1.45642	1.07633e-12	6.93634e-12	42	P02760	AMBP	Protein AMBP	AMBP_HUMAN	1	174.427	2.74427	Dengue	QC	NaN	NaN	NaN	29.183	0.137258
Dengue / QC	_WDPYKQGFGNVATNTDGK_	P02675	1.79904	1.79904	1.0776e-12	6.93668e-12	38	P02675	FGB	Fibrinogen beta chain	FIBB_HUMAN	1	247.99	3.4799	Dengue	QC	NaN	NaN	NaN	33.3519	0.152917
Dengue / QC	_SRLLATLC[Carbamidomethyl (C)]SAEVC[Carbamidomethyl (C)]QC[Carbamidomethyl (C)]AEGK_	P0C0L5	2.06294	2.06294	1.08225e-12	6.95874e-12	92	P0C0L5	C4B	Complement C4-B	CO4B_HUMAN	1	317.837	4.17837	Dengue	QC	NaN	NaN	NaN	68.5801	0.266426
Dengue / QC	_EGIVEYPRC[Carbamidomethyl (C)]E_	Q92496;Q92496-2	1.09744	1.09744	1.11639e-12	7.16201e-12	106	Q92496;Q92496-2	CFHR4	Complement factor H-related protein 4;Isoform 2 of Complement factor H-related protein 4	FHR4_HUMAN	1	113.974	2.13974	Dengue	QC	NaN	NaN	NaN	92.7108	0.138628
Dengue / QC	_AGELEVFNGYFVHFFAPDNLDPIPK_	P19823	0.840083	0.840083	1.16294e-12	7.44384e-12	172	P19823	ITIH2	Inter-alpha-trypsin inhibitor heavy chain H2	ITIH2_HUMAN	1	79.0153	1.79015	Dengue	QC	NaN	NaN	NaN	106.343	0.0933944
Dengue / QC	_FATTFYQHLADSKNDNDNIFLSPLSISTAFAMTK_	P01008	0.838775	0.838775	1.22518e-12	7.79832e-12	110	P01008	SERPINC1	Antithrombin-III	ANT3_HUMAN	1	78.8531	1.78853	Dengue	QC	NaN	NaN	NaN	80.9985	0.116128
Dengue / QC	_YEASILTHDSSIR_	P02679	2.18917	2.18917	1.28528e-12	8.15661e-12	72	P02679	FGG	Fibrinogen gamma chain	FIBG_HUMAN	1	356.043	4.56043	Dengue	QC	NaN	NaN	NaN	46.7269	0.204028
Dengue / QC	_LVSANRLFGDK_	P01008	2.64549	2.64549	1.30889e-12	8.29398e-12	32	P01008	SERPINC1	Antithrombin-III	ANT3_HUMAN	1	525.708	6.25708	Dengue	QC	NaN	NaN	NaN	20.8203	0.194437
Dengue / QC	_GISTSAASPAVGTVGMDMDEDDDFSKWNFYYSPQSSPDKK_	P04114	0.844219	0.844219	1.37846e-12	8.72511e-12	104	P04114	APOB	Apolipoprotein B-100	APOB_HUMAN	1	79.5292	1.79529	Dengue	QC	NaN	NaN	NaN	87.3068	0.113637
Dengue / QC	_MC[Carbamidomethyl (C)]VDVNEC[Carbamidomethyl (C)]QRYPGR_	P23142	3.13722	3.13722	1.39559e-12	8.82376e-12	90	P23142	FBLN1	Fibulin-1	FBLN1_HUMAN	1	779.827	8.79827	Dengue	QC	NaN	NaN	NaN	64.9459	0.335265
Dengue / QC	_VNIPLVTNEEC[Carbamidomethyl (C)]QK_	H0YAC1;P03952	1.42292	1.42292	1.80506e-12	1.11886e-11	34	H0YAC1;P03952	KLKB1	Plasma kallikrein (Fragment);Plasma kallikrein	H0YAC1_HUMAN;KLKB1_HUMAN	1	168.127	2.68127	Dengue	QC	NaN	NaN	NaN	25.7513	0.135075
Dengue / QC	_ALLVGEHLNIIVTPK_	P01031	0.596407	0.596407	2.12387e-12	1.30368e-11	96	P01031	C5	Complement C5	CO5_HUMAN	1	51.1947	1.51195	Dengue	QC	NaN	NaN	NaN	85.4224	0.098876
Dengue / QC	_EESSSGSSHAVMDISLPTGISANEEDLK_	P01031	0.970916	0.970916	2.1785e-12	1.33433e-11	78	P01031	C5	Complement C5	CO5_HUMAN	1	96.0085	1.96009	Dengue	QC	NaN	NaN	NaN	58.2545	0.105947
Dengue / QC	_TPFVTHPGYDTGNGIQLPGTSGQQPSVGQQMIFEEHGFR_	P02751;P02751-15;P02751-3;P02751-7	0.740278	0.740278	2.22743e-12	1.36136e-11	90	P02751;P02751-15;P02751-3;P02751-7	FN1	Fibronectin;Isoform 15 of Fibronectin;Isoform 3 of Fibronectin;Isoform 7 of Fibronectin	FINC_HUMAN	1	67.0497	1.6705	Dengue	QC	NaN	NaN	NaN	74.2719	0.101673
Dengue / QC	_MKPVPDLVPGNFK_	P02671	3.17544	3.17544	2.35437e-12	1.43432e-11	90	P02671	FGA	Fibrinogen alpha chain	FIBA_HUMAN	1	803.45	9.0345	Dengue	QC	NaN	NaN	NaN	70.5951	0.347523
Dengue / QC	_ASC[Carbamidomethyl (C)]KVPVK_	P02749	0.858553	0.858553	2.40602e-12	1.46266e-11	38	P02749	APOH	Beta-2-glycoprotein 1	APOH_HUMAN	1	81.3219	1.81322	Dengue	QC	NaN	NaN	NaN	32.7011	0.111618
Dengue / QC	_TTSAKETQSIEK_	A0A0U1RR20;Q92954;Q92954-3;Q92954-6	2.69717	2.69717	2.44264e-12	1.48175e-11	34	A0A0U1RR20;Q92954;Q92954-3;Q92954-6	PRG4	Proteoglycan 4;Proteoglycan 4;Isoform C of Proteoglycan 4;Isoform F of Proteoglycan 4	A0A0U1RR20_HUMAN;PRG4_HUMAN;PRG4_HUMAN;PRG4_HUMAN	1	548.529	6.48529	Dengue	QC	NaN	NaN	NaN	28.7849	0.215034
Dengue / QC	_NVVFVIDKSGSMSGRK_	Q14624	1.35425	1.35425	2.48994e-12	1.50883e-11	76	Q14624	ITIH4	Inter-alpha-trypsin inhibitor heavy chain H4	ITIH4_HUMAN	1	155.665	2.55665	Dengue	QC	NaN	NaN	NaN	64.0817	0.165144
Dengue / QC	_HADPDFTRKLWAYLTINQLLAER_	P19823	1.77174	1.77174	2.49496e-12	1.51026e-11	78	P19823	ITIH2	Inter-alpha-trypsin inhibitor heavy chain H2	ITIH2_HUMAN	1	241.465	3.41465	Dengue	QC	NaN	NaN	NaN	47.4466	0.247501
Dengue / QC	_LSRPAVITDK_	P08519	1.81337	1.81337	2.85549e-12	1.7139e-11	42	P08519	LPA	Apolipoprotein(a)	APOA_HUMAN	1	251.462	3.51462	Dengue	QC	NaN	NaN	NaN	23.1219	0.149168
Dengue / QC	_LFLGALPGEDSSTSFC[Carbamidomethyl (C)]LNGLWAQGQR_	I3L145;P04278	1.44274	1.44274	2.94956e-12	1.76477e-11	72	I3L145;P04278	SHBG	Sex hormone-binding globulin	I3L145_HUMAN;SHBG_HUMAN	1	171.837	2.71837	Dengue	QC	NaN	NaN	NaN	61.3105	0.162472
Dengue / QC	_VGDRNTEQEEGGEAVHEVEVVIK_	P00742	0.733902	0.733902	3.04706e-12	1.81927e-11	56	P00742	F10	Coagulation factor X	FA10_HUMAN	1	66.3131	1.66313	Dengue	QC	NaN	NaN	NaN	43.2312	0.0840576
Dengue / QC	_EIEEVLTPEMLMR_	P29622	0.465696	0.465696	3.24044e-12	1.93068e-11	122	P29622	SERPINA4	Kallistatin	KAIN_HUMAN	1	38.0983	1.38098	Dengue	QC	NaN	NaN	NaN	89.1755	0.075968
Dengue / QC	_EWFWDLATGTMKER_	P02790	0.554763	0.554763	3.34184e-12	1.989e-11	126	P02790	HPX	Hemopexin	HEMO_HUMAN	1	46.8927	1.46893	Dengue	QC	NaN	NaN	NaN	63.4778	0.0739025
Dengue / QC	_LKEEIGKELEELR_	P06727	1.32222	1.32222	3.3961e-12	2.01708e-11	42	P06727	APOA4	Apolipoprotein A-IV	APOA4_HUMAN	1	150.051	2.50051	Dengue	QC	NaN	NaN	NaN	35.659	0.13029
Dengue / QC	_SM[Oxidation (M)]GGKEDLIWELLNQAQEHFGK_	P02787	0.983928	0.983928	3.60564e-12	2.13262e-11	136	P02787	TF	Serotransferrin	TRFE_HUMAN	1	97.7843	1.97784	Dengue	QC	NaN	NaN	NaN	129.161	0.11353
Dengue / QC	_SGKFTC[Carbamidomethyl (C)]KVPGLYYFTYHASSR_	D6R934;P02746	2.05755	2.05755	3.64395e-12	2.1508e-11	72	D6R934;P02746	C1QB	Complement C1q subcomponent subunit B	D6R934_HUMAN;C1QB_HUMAN	1	316.279	4.16279	Dengue	QC	NaN	NaN	NaN	56.1185	0.219561
Dengue / QC	_QPPAWSIR_	A0A182DWH7;P49908	0.398416	0.398416	4.39229e-12	2.57114e-11	98	A0A182DWH7;P49908	SELENOP	Selenoprotein P (Fragment);Selenoprotein P	A0A182DWH7_HUMAN;SEPP1_HUMAN	1	31.806	1.31806	Dengue	QC	NaN	NaN	NaN	82.096	0.0644147
Dengue / QC	_LGPLVEQGRVR_	P02649	1.8057	1.8057	4.53044e-12	2.64656e-11	42	P02649	APOE	Apolipoprotein E	APOE_HUMAN	1	249.598	3.49598	Dengue	QC	NaN	NaN	NaN	33.9263	0.170543
Dengue / QC	_HGTDDGVVWMNWK_	P02675	3.24145	3.24145	4.61993e-12	2.69607e-11	122	P02675	FGB	Fibrinogen beta chain	FIBB_HUMAN	1	845.747	9.45747	Dengue	QC	NaN	NaN	NaN	89.8959	0.381035
Dengue / QC	_AKLPDATPK_	P02774;P02774-3	1.46023	1.46023	4.65189e-12	2.71193e-11	58	P02774;P02774-3	GC	Vitamin D-binding protein;Isoform 3 of Vitamin D-binding protein	VTDB_HUMAN	1	175.152	2.75152	Dengue	QC	NaN	NaN	NaN	36.4935	0.156653
Dengue / QC	_M[Oxidation (M)]KYWGVASFLQK_	P02753;Q5VY30	1.38795	1.38795	4.68077e-12	2.7204e-11	98	P02753;Q5VY30	RBP4	Retinol-binding protein 4;Retinol binding protein 4, plasma, isoform CRA_b	RET4_HUMAN;Q5VY30_HUMAN	1	161.707	2.61707	Dengue	QC	NaN	NaN	NaN	87.8447	0.119601
Dengue / QC	_C[Carbamidomethyl (C)]LPVTAPENGKIVSSAMEPDREYHFGQAVR_	P08603	3.2251	3.2251	4.68075e-12	2.7204e-11	56	P08603	CFH	Complement factor H	CFAH_HUMAN	1	835.088	9.35088	Dengue	QC	NaN	NaN	NaN	33.2944	0.297751
Dengue / QC	_GSESGIFTNTKESSSHHPGIAEFPSR_	P02671	2.62191	2.62191	4.794e-12	2.78052e-11	80	P02671	FGA	Fibrinogen alpha chain	FIBA_HUMAN	1	515.564	6.15564	Dengue	QC	NaN	NaN	NaN	58.1759	0.286784
Dengue / QC	_LYSVSYLLK_	P21333;P21333-2;Q5HY54	0.87472	0.87472	4.8766e-12	2.82127e-11	68	P21333;P21333-2;Q5HY54	FLNA	Filamin-A;Isoform 2 of Filamin-A;Filamin-A	FLNA_HUMAN;FLNA_HUMAN;Q5HY54_HUMAN	1	83.3652	1.83365	Dengue	QC	NaN	NaN	NaN	59.5722	0.114214
Dengue / QC	_VVSM[Oxidation (M)]DENFHPLNELIPLVYIQDPKGNR_	P01023	0.475637	0.475637	4.9374e-12	2.85205e-11	80	P01023	A2M	Alpha-2-macroglobulin	A2MG_HUMAN	1	39.0532	1.39053	Dengue	QC	NaN	NaN	NaN	68.5649	0.135041
Dengue / QC	_AC[Carbamidomethyl (C)]GAC[Carbamidomethyl (C)]PLWGKC[Carbamidomethyl (C)]DAESSK_	P10643	2.77538	2.77538	4.94431e-12	2.85314e-11	46	P10643	C7	Complement component C7	CO7_HUMAN	1	584.659	6.84659	Dengue	QC	NaN	NaN	NaN	37.5949	0.24006
Dengue / QC	_HLIVTPSGC[Carbamidomethyl (C)]GEQNMIGMTPTVIAVHYLDETEQWEKFGLEKR_	P01024	0.632947	0.632947	5.14381e-12	2.95328e-11	114	P01024	C3	Complement C3	CO3_HUMAN	1	55.0729	1.55073	Dengue	QC	NaN	NaN	NaN	67.7337	0.0849122
Dengue / QC	_YTTEIIKC[Carbamidomethyl (C)]PQPK_	B4DPQ0	2.28209	2.28209	5.25874e-12	3.01317e-11	100	B4DPQ0	C1R	Complement C1r subcomponent	B4DPQ0_HUMAN	1	386.382	4.86382	Dengue	QC	NaN	NaN	NaN	78.497	0.229149
Dengue / QC	_LGNQEPGGQTALKSPPGVC[Carbamidomethyl (C)]SRDPTPEQTHR_	P08697	1.45792	1.45792	5.35571e-12	3.05641e-11	72	P08697	SERPINF2	Alpha-2-antiplasmin	A2AP_HUMAN	1	174.712	2.74712	Dengue	QC	NaN	NaN	NaN	65.0439	0.168435
Dengue / QC	_TAVNALWGK_	P02042	0.428489	0.428489	5.48033e-12	3.12126e-11	102	P02042	HBD	Hemoglobin subunit delta	HBD_HUMAN	1	34.5823	1.34582	Dengue	QC	NaN	NaN	NaN	92.0637	0.0562216
Dengue / QC	_VTIM[Oxidation (M)]WTPPESAVTGYRVDVIPVNLPGEHGQR_	P02751;P02751-15;P02751-3;P02751-7	-0.51861	0.51861	5.5744e-12	3.17166e-11	28	P02751;P02751-15;P02751-3;P02751-7	FN1	Fibronectin;Isoform 15 of Fibronectin;Isoform 3 of Fibronectin;Isoform 7 of Fibronectin	FINC_HUMAN	1	-30.1956	0.698044	Dengue	QC	NaN	NaN	NaN	10.7367	0.246106
Dengue / QC	_AHLNIKSPAFTDLHLR_	P04114	4.61097	4.61097	5.58611e-12	3.17515e-11	30	P04114	APOB	Apolipoprotein B-100	APOB_HUMAN	1	2343.66	24.4366	Dengue	QC	NaN	NaN	NaN	25.0265	0.323522
Dengue / QC	_DRQHLPLIK_	P02671	2.12635	2.12635	5.77426e-12	3.26901e-11	36	P02671	FGA	Fibrinogen alpha chain	FIBA_HUMAN	1	336.611	4.36611	Dengue	QC	NaN	NaN	NaN	31.2459	0.173272
Dengue / QC	_GDIGETGVPGAEGPR_	Q15848	0.543954	0.543954	6.27542e-12	3.53163e-11	106	Q15848	ADIPOQ	Adiponectin	ADIPO_HUMAN	1	45.7963	1.45796	Dengue	QC	NaN	NaN	NaN	55.8828	0.0887247
Dengue / QC	_TVIGPDGHKEVTK_	P02671	3.16922	3.16922	6.61021e-12	3.69808e-11	86	P02671	FGA	Fibrinogen alpha chain	FIBA_HUMAN	1	799.563	8.99563	Dengue	QC	NaN	NaN	NaN	63.2322	0.342712
Dengue / QC	_SLAPYAQDTQEKLNHQLEGLTFQMK_	P06727	0.921917	0.921917	6.75303e-12	3.76685e-11	116	P06727	APOA4	Apolipoprotein A-IV	APOA4_HUMAN	1	89.4631	1.89463	Dengue	QC	NaN	NaN	NaN	101.834	0.113719
Dengue / QC	_LLIYSNNQR_	P01699	1.44886	1.44886	7.26429e-12	4.04409e-11	60	P01699	IGLV1-44	Immunoglobulin lambda variable 1-44	LV144_HUMAN	1	172.992	2.72992	Dengue	QC	NaN	NaN	NaN	52.715	0.16212
Dengue / QC	_VSVFVPPR_	P01871	-0.664814	0.664814	7.31919e-12	4.06669e-11	176	P01871	IGHM	Immunoglobulin heavy constant mu	IGHM_HUMAN	1	-36.923	0.63077	Dengue	QC	NaN	NaN	NaN	93.9459	0.0855957
Dengue / QC	_IDQNVEELK_	P06727	0.466355	0.466355	7.3579e-12	4.08421e-11	148	P06727	APOA4	Apolipoprotein A-IV	APOA4_HUMAN	1	38.1615	1.38161	Dengue	QC	NaN	NaN	NaN	138.781	0.072163
Dengue / QC	_QGDVEC[Carbamidomethyl (C)]QR_	P13671	0.891592	0.891592	7.57387e-12	4.18366e-11	102	P13671	C6	Complement component C6	CO6_HUMAN	1	85.5223	1.85522	Dengue	QC	NaN	NaN	NaN	35.3507	0.125855
Dengue / QC	_A[Acetyl (Protein N-term)]GLNSLEAVKR_	P67936	0.833466	0.833466	7.59157e-12	4.18937e-11	54	P67936	TPM4	Tropomyosin alpha-4 chain	TPM4_HUMAN	1	78.1961	1.78196	Dengue	QC	NaN	NaN	NaN	47.0994	0.111078
Dengue / QC	_ENPAVIDFELAPIVDLVR_	P13671	0.655539	0.655539	7.69107e-12	4.23605e-11	138	P13671	C6	Complement component C6	CO6_HUMAN	1	57.5205	1.5752	Dengue	QC	NaN	NaN	NaN	132.21	0.0925976
Dengue / QC	_ILGDMQPGDYFDLVLFGTR_	P19827	0.79141	0.79141	7.73362e-12	4.25536e-11	108	P19827	ITIH1	Inter-alpha-trypsin inhibitor heavy chain H1	ITIH1_HUMAN	1	73.0766	1.73077	Dengue	QC	NaN	NaN	NaN	31.9353	0.1012
Dengue / QC	_IQC[Carbamidomethyl (C)]AAGYEQSEHNVC[Carbamidomethyl (C)]QDIDEC[Carbamidomethyl (C)]TAGTHNC[Carbamidomethyl (C)]R_	Q12805;Q12805-2;Q12805-4	1.07338	1.07338	7.97798e-12	4.37288e-11	110	Q12805;Q12805-2;Q12805-4	EFEMP1	EGF-containing fibulin-like extracellular matrix protein 1;Isoform 2 of EGF-containing fibulin-like extracellular matrix protein 1;Isoform 4 of EGF-containing fibulin-like extracellular matrix protein 1	FBLN3_HUMAN	1	110.436	2.10436	Dengue	QC	NaN	NaN	NaN	99.2188	0.121217
Dengue / QC	_QLVHHFEIDVDIFEPQGISK_	P19827	0.952656	0.952656	8.37376e-12	4.58099e-11	166	P19827	ITIH1	Inter-alpha-trypsin inhibitor heavy chain H1	ITIH1_HUMAN	1	93.5432	1.93543	Dengue	QC	NaN	NaN	NaN	105.454	0.093778
Dengue / QC	_SNRVTVFPIGIGDRYDAAQLR_	P04275	1.6142	1.6142	8.4178e-12	4.60065e-11	90	P04275	VWF	von Willebrand factor	VWF_HUMAN	1	206.142	3.06142	Dengue	QC	NaN	NaN	NaN	61.8521	0.198721
Dengue / QC	_SC[Carbamidomethyl (C)]ESNSPFPVHPGTAEC[Carbamidomethyl (C)]C[Carbamidomethyl (C)]TKEGLER_	P02774;P02774-3	2.75704	2.75704	9.36703e-12	5.09008e-11	130	P02774;P02774-3	GC	Vitamin D-binding protein;Isoform 3 of Vitamin D-binding protein	VTDB_HUMAN	1	576.009	6.76009	Dengue	QC	NaN	NaN	NaN	93.8971	0.306281
Dengue / QC	_LLATLC[Carbamidomethyl (C)]SAEVC[Carbamidomethyl (C)]QC[Carbamidomethyl (C)]AEGKC[Carbamidomethyl (C)]PR_	P0C0L5	3.00201	3.00201	9.67299e-12	5.2463e-11	86	P0C0L5	C4B	Complement C4-B	CO4B_HUMAN	1	701.117	8.01117	Dengue	QC	NaN	NaN	NaN	61.7432	0.337465
Dengue / QC	_HYYIAAEEIIWNYAPSGIDIFTK_	P00450	1.57959	1.57959	9.78433e-12	5.29155e-11	42	P00450	CP	Ceruloplasmin	CERU_HUMAN	1	198.885	2.98885	Dengue	QC	NaN	NaN	NaN	29.0326	0.139854
Dengue / QC	_LPSGLPVSLLTLYLDNNKISNIPDEYFK_	P51884	0.657007	0.657007	1.031e-11	5.55471e-11	38	P51884	LUM	Lumican	LUM_HUMAN	1	57.6809	1.57681	Dengue	QC	NaN	NaN	NaN	32.6985	0.113422
Dengue / QC	_VREYYFAEAQIADFSDPAFISK_	P05546	0.471526	0.471526	1.05854e-11	5.69767e-11	126	P05546	SERPIND1	Heparin cofactor 2	HEP2_HUMAN	1	38.6576	1.38658	Dengue	QC	NaN	NaN	NaN	101.502	0.0652318
Dengue / QC	_GGMRKFIC[Carbamidomethyl (C)]PLTGLWPINTLK_	P02749	1.52799	1.52799	1.08311e-11	5.82439e-11	156	P02749	APOH	Beta-2-glycoprotein 1	APOH_HUMAN	1	188.383	2.88383	Dengue	QC	NaN	NaN	NaN	139.457	0.170791
Dengue / QC	_QLYNVEATSYALLALLQLK_	P01024	0.595339	0.595339	1.14349e-11	6.12591e-11	30	P01024	C3	Complement C3	CO3_HUMAN	1	51.0828	1.51083	Dengue	QC	NaN	NaN	NaN	23.0827	0.0801734
Dengue / QC	_FTIYNNMFC[Carbamidomethyl (C)]AGFHEGGR_	P00740	0.765236	0.765236	1.15409e-11	6.17689e-11	78	P00740	F9	Coagulation factor IX	FA9_HUMAN	1	69.9647	1.69965	Dengue	QC	NaN	NaN	NaN	69.6981	0.0858693
Dengue / QC	_GRFPLYNLGFGHNVDFNFLEVMSMENNGR_	P19827	1.36835	1.36835	1.23072e-11	6.55004e-11	44	P19827	ITIH1	Inter-alpha-trypsin inhibitor heavy chain H1	ITIH1_HUMAN	1	158.176	2.58176	Dengue	QC	NaN	NaN	NaN	23.7773	0.170923
Dengue / QC	_M[Oxidation (M)]YSVNGYTFGSLPGLSMC[Carbamidomethyl (C)]AEDR_	P00450	0.306671	0.306671	1.23995e-11	6.5868e-11	34	P00450	CP	Ceruloplasmin	CERU_HUMAN	1	23.685	1.23685	Dengue	QC	NaN	NaN	NaN	18.3377	0.380533
Dengue / QC	_LKAKLPDATPTELAK_	D6RF35	1.17193	1.17193	1.27406e-11	6.74908e-11	70	D6RF35	GC	Vitamin D-binding protein	D6RF35_HUMAN	1	125.313	2.25313	Dengue	QC	NaN	NaN	NaN	65.561	0.133328
Dengue / QC	_LHELQEKLSPLGEEMRDR_	P02647	1.54186	1.54186	1.31553e-11	6.95578e-11	114	P02647	APOA1	Apolipoprotein A-I	APOA1_HUMAN	1	191.17	2.9117	Dengue	QC	NaN	NaN	NaN	105.286	0.170601
Dengue / QC	_EDGGGWWYNR_	P02675	2.82426	2.82426	1.36124e-11	7.1841e-11	120	P02675	FGB	Fibrinogen beta chain	FIBB_HUMAN	1	608.25	7.0825	Dengue	QC	NaN	NaN	NaN	90.7175	0.338709
Dengue / QC	_TEDTIFLR_	P19652	-0.588821	0.588821	1.42691e-11	7.52371e-11	172	P19652	ORM2	Alpha-1-acid glycoprotein 2	A1AG2_HUMAN	1	-33.5114	0.664886	Dengue	QC	NaN	NaN	NaN	91.7195	0.0796091
Dengue / QC	_LLIYDASNRATGIPAR_	P04433	4.63112	4.63112	1.55831e-11	8.17858e-11	56	P04433	IGKV3-11	Immunoglobulin kappa variable 3-11	KV311_HUMAN	1	2378.03	24.7803	Dengue	QC	NaN	NaN	NaN	27.6397	0.392654
Dengue / QC	_DTLM[Oxidation (M)]ISRTPEVTC[Carbamidomethyl (C)]VVVDVSHEDPEVK_	P01857	-0.797787	0.797787	1.55732e-11	8.17858e-11	106	P01857	IGHG1	Immunoglobulin heavy constant gamma 1	IGHG1_HUMAN	1	-42.4769	0.575231	Dengue	QC	NaN	NaN	NaN	24.6496	0.510148
Dengue / QC	_VAQLEAQC[Carbamidomethyl (C)]QEPC[Carbamidomethyl (C)]KDTVQIHDITGKDC[Carbamidomethyl (C)]QDIANK_	P02679	2.34383	2.34383	1.57554e-11	8.26143e-11	66	P02679	FGG	Fibrinogen gamma chain	FIBG_HUMAN	1	407.648	5.07648	Dengue	QC	NaN	NaN	NaN	60.0324	0.263683
Dengue / QC	_KLVPFATELHER_	P06727	0.754011	0.754011	1.59273e-11	8.33619e-11	108	P06727	APOA4	Apolipoprotein A-IV	APOA4_HUMAN	1	68.6475	1.68647	Dengue	QC	NaN	NaN	NaN	101.999	0.0870786
Dengue / QC	_EQQALQTVC[Carbamidomethyl (C)]LK_	E9PHK0;P05452	0.731396	0.731396	1.60526e-11	8.39403e-11	54	E9PHK0;P05452	CLEC3B	Tetranectin	E9PHK0_HUMAN;TETN_HUMAN	1	66.0245	1.66025	Dengue	QC	NaN	NaN	NaN	32.3284	0.0895634
Dengue / QC	_RC[Carbamidomethyl (C)]C[Carbamidomethyl (C)]QDGVTRLPMMR_	P0C0L5	2.5495	2.5495	1.61869e-11	8.45648e-11	72	P0C0L5	C4B	Complement C4-B	CO4B_HUMAN	1	485.432	5.85432	Dengue	QC	NaN	NaN	NaN	59.579	0.233145
Dengue / QC	_SVPMVPPGIKYLYLR_	P51884	3.79102	3.79102	1.63271e-11	8.52187e-11	26	P51884	LUM	Lumican	LUM_HUMAN	1	1284.23	13.8423	Dengue	QC	NaN	NaN	NaN	14.642	0.277371
Dengue / QC	_SETAEELKK_	O14791;O14791-2	0.746676	0.746676	1.66872e-11	8.70185e-11	156	O14791;O14791-2	APOL1	Apolipoprotein L1;Isoform 2 of Apolipoprotein L1	APOL1_HUMAN	1	67.7922	1.67792	Dengue	QC	NaN	NaN	NaN	102.237	0.103733
Dengue / QC	_C[Carbamidomethyl (C)]VNSPGSFR_	P23142	1.29673	1.29673	1.7017e-11	8.85757e-11	74	P23142	FBLN1	Fibulin-1	FBLN1_HUMAN	1	145.672	2.45672	Dengue	QC	NaN	NaN	NaN	67.204	0.163421
Dengue / QC	_VELEDWNGR_	P02679	2.73533	2.73533	1.76678e-11	9.18791e-11	122	P02679	FGG	Fibrinogen gamma chain	FIBG_HUMAN	1	565.911	6.65911	Dengue	QC	NaN	NaN	NaN	88.5034	0.322496
Dengue / QC	_NIPTVNENLENYYLEVNQLEKFDIK_	P51884	0.918242	0.918242	1.86042e-11	9.65571e-11	64	P51884	LUM	Lumican	LUM_HUMAN	1	88.9811	1.88981	Dengue	QC	NaN	NaN	NaN	46.1213	0.116056
Dengue / QC	_MGPTELLIEMEDWKGDKVK_	P02675	4.50544	4.50544	1.86183e-11	9.65571e-11	40	P02675	FGB	Fibrinogen beta chain	FIBB_HUMAN	1	2171.29	22.7129	Dengue	QC	NaN	NaN	NaN	28.8915	0.331026
Dengue / QC	_GLIDEVNQDFTNR_	P02671	2.27879	2.27879	1.86435e-11	9.65995e-11	54	P02671	FGA	Fibrinogen alpha chain	FIBA_HUMAN	1	385.272	4.85272	Dengue	QC	NaN	NaN	NaN	40.9565	0.201446
Dengue / QC	_C[Carbamidomethyl (C)]FSSDFMAYDIAC[Carbamidomethyl (C)]DR_	O75882;O75882-2	0.76327	0.76327	1.97508e-11	1.02151e-10	52	O75882;O75882-2	ATRN	Attractin;Isoform 2 of Attractin	ATRN_HUMAN	1	69.7333	1.69733	Dengue	QC	NaN	NaN	NaN	27.7974	0.0990909
Dengue / QC	_GFPSVLR_	P01871	-0.602487	0.602487	1.98103e-11	1.02365e-10	174	P01871	IGHM	Immunoglobulin heavy constant mu	IGHM_HUMAN	1	-34.1382	0.658618	Dengue	QC	NaN	NaN	NaN	92.2594	0.0772077
Dengue / QC	_NPDPVAAPYC[Carbamidomethyl (C)]YTRDPSVR_	P08519	2.51612	2.51612	2.02371e-11	1.04286e-10	36	P08519	LPA	Apolipoprotein(a)	APOA_HUMAN	1	472.043	5.72043	Dengue	QC	NaN	NaN	NaN	30.3928	0.254277
Dengue / QC	_NTDEDKWGDAC[Carbamidomethyl (C)]DNC[Carbamidomethyl (C)]R_	G3XAP6;P49747	1.70567	1.70567	2.11144e-11	1.08316e-10	60	G3XAP6;P49747	COMP	Cartilage oligomeric matrix protein	G3XAP6_HUMAN;COMP_HUMAN	1	226.18	3.2618	Dengue	QC	NaN	NaN	NaN	48.6456	0.261543
Dengue / QC	_MYYSAVEPTKDIFTGLIGPM[Oxidation (M)]K_	E9PFZ2	1.77938	1.77938	2.33586e-11	1.18757e-10	46	E9PFZ2	CP	Ceruloplasmin	E9PFZ2_HUMAN	1	243.279	3.43279	Dengue	QC	NaN	NaN	NaN	35.8386	0.253916
Dengue / QC	_FSDEGTHESQISFTIEGPLTSFGLSNK_	P04114	1.16069	1.16069	2.40693e-11	1.22152e-10	80	P04114	APOB	Apolipoprotein B-100	APOB_HUMAN	1	123.565	2.23565	Dengue	QC	NaN	NaN	NaN	47.8544	0.152443
Dengue / QC	_GSFAC[Carbamidomethyl (C)]QC[Carbamidomethyl (C)]PPGYQK_	Q12805;Q12805-2;Q12805-4	1.27688	1.27688	2.4274e-11	1.22971e-10	54	Q12805;Q12805-2;Q12805-4	EFEMP1	EGF-containing fibulin-like extracellular matrix protein 1;Isoform 2 of EGF-containing fibulin-like extracellular matrix protein 1;Isoform 4 of EGF-containing fibulin-like extracellular matrix protein 1	FBLN3_HUMAN	1	142.315	2.42315	Dengue	QC	NaN	NaN	NaN	47.4421	0.152634
Dengue / QC	_SMGGKEDLIWELLNQAQEHFGK_	P02787	0.945154	0.945154	2.46617e-11	1.24824e-10	172	P02787	TF	Serotransferrin	TRFE_HUMAN	1	92.5394	1.92539	Dengue	QC	NaN	NaN	NaN	113.274	0.164007
Dengue / QC	_TILDDLRAEDHFSVIDFNQNIR_	P19823	0.732552	0.732552	2.55975e-11	1.29215e-10	124	P19823	ITIH2	Inter-alpha-trypsin inhibitor heavy chain H2	ITIH2_HUMAN	1	66.1576	1.66158	Dengue	QC	NaN	NaN	NaN	98.0902	0.0992734
Dengue / QC	_GLEWIGEIYHSGSTNYNPSLK_	A0A075B6R2	0.268518	0.268518	2.59823e-11	1.30925e-10	72	A0A075B6R2	IGHV4-4	Immunoglobulin heavy variable 4-4	HV404_HUMAN	1	20.4569	1.20457	Dengue	QC	NaN	NaN	NaN	46.1381	0.187799
Dengue / QC	_LELELRPTGEIEQYSVSATYELQREDR_	P04114	0.655239	0.655239	2.63259e-11	1.32539e-10	160	P04114	APOB	Apolipoprotein B-100	APOB_HUMAN	1	57.4877	1.57488	Dengue	QC	NaN	NaN	NaN	96.0368	0.0861003
Dengue / QC	_QSSGENC[Carbamidomethyl (C)]DVVVNTLGK_	P01833	1.6483	1.6483	2.65645e-11	1.33622e-10	94	P01833	PIGR	Polymeric immunoglobulin receptor	PIGR_HUMAN	1	213.464	3.13464	Dengue	QC	NaN	NaN	NaN	67.5994	0.218424
Dengue / QC	_QVKDNENVVNEYSSELEK_	P02675	1.8884	1.8884	2.70162e-11	1.35774e-10	42	P02675	FGB	Fibrinogen beta chain	FIBB_HUMAN	1	270.224	3.70224	Dengue	QC	NaN	NaN	NaN	37.4468	0.18409
Dengue / QC	_KFPSGTFEQVSQLVKEVVSLTEAC[Carbamidomethyl (C)]C[Carbamidomethyl (C)]AEGADPDC[Carbamidomethyl (C)]YDTR_	P02774;P02774-3	4.63042	4.63042	2.74582e-11	1.37751e-10	40	P02774;P02774-3	GC	Vitamin D-binding protein;Isoform 3 of Vitamin D-binding protein	VTDB_HUMAN	1	2376.83	24.7683	Dengue	QC	NaN	NaN	NaN	32.8678	0.485818
Dengue / QC	_MLQITNTGFEMK_	P20742	2.60348	2.60348	2.88426e-11	1.44061e-10	72	P20742	PZP	Pregnancy zone protein	PZP_HUMAN	1	507.749	6.07749	Dengue	QC	NaN	NaN	NaN	49.9661	0.272255
Dengue / QC	_FYYLIASETPGK_	P29622	0.38256	0.38256	2.92795e-11	1.46115e-10	70	P29622	SERPINA4	Kallistatin	KAIN_HUMAN	1	30.3653	1.30365	Dengue	QC	NaN	NaN	NaN	44.3264	0.0822683
Dengue / QC	_TC[Carbamidomethyl (C)]QDINEC[Carbamidomethyl (C)]ETTNEC[Carbamidomethyl (C)]REDEMC[Carbamidomethyl (C)]WNYHGGFR_	Q12805;Q12805-2;Q12805-4	2.38137	2.38137	2.94183e-11	1.46679e-10	26	Q12805;Q12805-2;Q12805-4	EFEMP1	EGF-containing fibulin-like extracellular matrix protein 1;Isoform 2 of EGF-containing fibulin-like extracellular matrix protein 1;Isoform 4 of EGF-containing fibulin-like extracellular matrix protein 1	FBLN3_HUMAN	1	421.03	5.2103	Dengue	QC	NaN	NaN	NaN	17.8766	0.158229
Dengue / QC	_GLPAPIEKTISK_	P01859	3.44446	3.44446	2.98614e-11	1.48757e-10	76	P01859	IGHG2	Immunoglobulin heavy constant gamma 2	IGHG2_HUMAN	1	988.645	10.8864	Dengue	QC	NaN	NaN	NaN	51.1095	0.376612
Dengue / QC	_YLQEIYNSNNQK_	P02679	1.67356	1.67356	3.03727e-11	1.5104e-10	110	P02679	FGG	Fibrinogen gamma chain	FIBG_HUMAN	1	219.002	3.19002	Dengue	QC	NaN	NaN	NaN	92.9489	0.201878
Dengue / QC	_DMALTAFVLISLQEAKDIC[Carbamidomethyl (C)]EEQVNSLPGSITK_	P01024	1.49155	1.49155	3.06126e-11	1.521e-10	70	P01024	C3	Complement C3	CO3_HUMAN	1	181.191	2.81191	Dengue	QC	NaN	NaN	NaN	20.8497	0.152339
Dengue / QC	_TSTADYAMFK_	P02679	2.8566	2.8566	3.13742e-11	1.55747e-10	126	P02679	FGG	Fibrinogen gamma chain	FIBG_HUMAN	1	624.304	7.24304	Dengue	QC	NaN	NaN	NaN	97.0549	0.332178
Dengue / QC	_HSITNPLAVLC[Carbamidomethyl (C)]EFISQSIK_	P04114	1.13087	1.13087	3.1967e-11	1.58e-10	76	P04114	APOB	Apolipoprotein B-100	APOB_HUMAN	1	118.991	2.18991	Dengue	QC	NaN	NaN	NaN	68.9532	0.147902
Dengue / QC	_WNPSPPAC[Carbamidomethyl (C)]EPNSC[Carbamidomethyl (C)]INLPDIPHASWETYPRPTK_	P04003	1.12157	1.12157	3.2532e-11	1.60653e-10	66	P04003	C4BPA	C4b-binding protein alpha chain	C4BPA_HUMAN	1	117.584	2.17584	Dengue	QC	NaN	NaN	NaN	19.4028	0.136718
Dengue / QC	_TAGYGINILGM[Oxidation (M)]DPLSTPFDNEFYNGLC[Carbamidomethyl (C)]NR_	P02748	0.21203	0.21203	3.49734e-11	1.71963e-10	50	P02748	C9	Complement component C9	CO9_HUMAN	1	15.8317	1.15832	Dengue	QC	NaN	NaN	NaN	32.63	0.165716
Dengue / QC	_LIVHNGYC[Carbamidomethyl (C)]DGRSER_	P02753;Q5VY30	2.93045	2.93045	3.644e-11	1.78556e-10	70	P02753;Q5VY30	RBP4	Retinol-binding protein 4;Retinol binding protein 4, plasma, isoform CRA_b	RET4_HUMAN;Q5VY30_HUMAN	1	662.348	7.62348	Dengue	QC	NaN	NaN	NaN	48.459	0.307542
Dengue / QC	_AQLVDMK_	P02671	2.53295	2.53295	3.71051e-11	1.81502e-10	148	P02671	FGA	Fibrinogen alpha chain	FIBA_HUMAN	1	478.753	5.78753	Dengue	QC	NaN	NaN	NaN	132.848	0.317242
Dengue / QC	_WSPELPVC[Carbamidomethyl (C)]APIIC[Carbamidomethyl (C)]PPPSIPTFATLR_	P02749	0.692018	0.692018	3.9588e-11	1.92653e-10	170	P02749	APOH	Beta-2-glycoprotein 1	APOH_HUMAN	1	61.5542	1.61554	Dengue	QC	NaN	NaN	NaN	113.467	0.0870886
Dengue / QC	_WDPYKQGFGNVATNTDGKNYC[Carbamidomethyl (C)]GLPGEYWLGNDK_	P02675	3.20012	3.20012	4.09057e-11	1.98653e-10	26	P02675	FGB	Fibrinogen beta chain	FIBB_HUMAN	1	819.035	9.19035	Dengue	QC	NaN	NaN	NaN	13.9193	0.148974
Dengue / QC	_LTVDKSRWQQGNIFSC[Carbamidomethyl (C)]SVMHEALHNR_	P01860	0.153139	0.153139	4.34903e-11	2.10561e-10	36	P01860	IGHG3	Immunoglobulin heavy constant gamma 3	IGHG3_HUMAN	1	11.1986	1.11199	Dengue	QC	NaN	NaN	NaN	15.9474	0.503055
Dengue / QC	_C[Carbamidomethyl (C)]VC[Carbamidomethyl (C)]PVSNAMC[Carbamidomethyl (C)]R_	Q12805;Q12805-2;Q12805-4	1.01903	1.01903	4.43554e-11	2.1402e-10	74	Q12805;Q12805-2;Q12805-4	EFEMP1	EGF-containing fibulin-like extracellular matrix protein 1;Isoform 2 of EGF-containing fibulin-like extracellular matrix protein 1;Isoform 4 of EGF-containing fibulin-like extracellular matrix protein 1	FBLN3_HUMAN	1	102.655	2.02655	Dengue	QC	NaN	NaN	NaN	67.3083	0.165003
Dengue / QC	_NKC[Carbamidomethyl (C)]YTAVVPLVYGGETK_	P01591	2.84388	2.84388	4.51844e-11	2.17651e-10	64	P01591	JCHAIN	Immunoglobulin J chain	IGJ_HUMAN	1	617.95	7.1795	Dengue	QC	NaN	NaN	NaN	38.2211	0.282006
Dengue / QC	_ALVDTLKFVTQAEGAK_	P04114	1.66873	1.66873	4.53246e-11	2.18046e-10	92	P04114	APOB	Apolipoprotein B-100	APOB_HUMAN	1	217.934	3.17934	Dengue	QC	NaN	NaN	NaN	72.7778	0.190157
Dengue / QC	_TTMKIIPFNRLTIGEGQQHHLGGAK_	P02679	2.85082	2.85082	4.54092e-11	2.18179e-10	32	P02679	FGG	Fibrinogen gamma chain	FIBG_HUMAN	1	621.408	7.21408	Dengue	QC	NaN	NaN	NaN	22.2635	0.198054
Dengue / QC	_GLFIIDGK_	P32119	0.327329	0.327329	4.57719e-11	2.19664e-10	114	P32119	PRDX2	Peroxiredoxin-2	PRDX2_HUMAN	1	25.4688	1.25469	Dengue	QC	NaN	NaN	NaN	99.2637	0.0605685
Dengue / QC	_E[Acetyl (Protein N-term)]EEIAALVIDNGSGMC[Carbamidomethyl (C)]K_	P63261	1.71463	1.71463	4.79564e-11	2.29063e-10	70	P63261	ACTG1	Actin, cytoplasmic 2	ACTG_HUMAN	1	228.213	3.28213	Dengue	QC	NaN	NaN	NaN	52.3427	0.236119
Dengue / QC	_PGQAPVLVIYGK_	P01714	1.67909	1.67909	4.86068e-11	2.31974e-10	36	P01714	IGLV3-19	Immunoglobulin lambda variable 3-19	LV319_HUMAN	1	220.226	3.20226	Dengue	QC	NaN	NaN	NaN	19.2816	0.36274
Dengue / QC	_VTSTLTIKESDWLGQSMFTC[Carbamidomethyl (C)]R_	P01871	0.211627	0.211627	4.87693e-11	2.32554e-10	116	P01871	IGHM	Immunoglobulin heavy constant mu	IGHM_HUMAN	1	15.7993	1.15799	Dengue	QC	NaN	NaN	NaN	44.279	0.40549
Dengue / QC	_TLMFGSYLDDEKNWGLSFYADKPETTK_	P19652	0.533952	0.533952	4.90397e-11	2.33647e-10	160	P19652	ORM2	Alpha-1-acid glycoprotein 2	A1AG2_HUMAN	1	44.789	1.44789	Dengue	QC	NaN	NaN	NaN	135.352	0.0791634
Dengue / QC	_WVMVPMMSLHHLTIPYFRDEELSC[Carbamidomethyl (C)]TVVELK_	P01011	1.46241	1.46241	5.02062e-11	2.38605e-10	82	P01011	SERPINA3	Alpha-1-antichymotrypsin	AACT_HUMAN	1	175.569	2.75569	Dengue	QC	NaN	NaN	NaN	72.4313	0.18708
Dengue / QC	_ETTFNSLLC[Carbamidomethyl (C)]PSGGEVSEELSLK_	P01023	0.691224	0.691224	5.0915e-11	2.41309e-10	148	P01023	A2M	Alpha-2-macroglobulin	A2MG_HUMAN	1	61.4652	1.61465	Dengue	QC	NaN	NaN	NaN	135.619	0.103979
Dengue / QC	_NIPGDFEC[Carbamidomethyl (C)]EC[Carbamidomethyl (C)]PEGYRYNLK_	P07225	2.11308	2.11308	5.09362e-11	2.41309e-10	56	P07225	PROS1	Vitamin K-dependent protein S	PROS_HUMAN	1	332.614	4.32614	Dengue	QC	NaN	NaN	NaN	45.3629	0.236229
Dengue / QC	_HVSSPLASYFLSFPYAR_	P80108	0.982001	0.982001	5.09758e-11	2.41309e-10	84	P80108	GPLD1	Phosphatidylinositol-glycan-specific phospholipase D	PHLD_HUMAN	1	97.5203	1.9752	Dengue	QC	NaN	NaN	NaN	26.2441	0.112593
Dengue / QC	_NHRSPVTLLAAVMSLPEEHNK_	P18428	1.57612	1.57612	5.30323e-11	2.5057e-10	46	P18428	LBP	Lipopolysaccharide-binding protein	LBP_HUMAN	1	198.167	2.98167	Dengue	QC	NaN	NaN	NaN	36.1229	0.153659
Dengue / QC	_FTC[Carbamidomethyl (C)]TVTHTDLPSPLK_	P01871	-0.565212	0.565212	5.67381e-11	2.67191e-10	176	P01871	IGHM	Immunoglobulin heavy constant mu	IGHM_HUMAN	1	-32.4144	0.675856	Dengue	QC	NaN	NaN	NaN	93.104	0.0698528
Dengue / QC	_VGLSGMAIADVTLLSGFHALRADLEK_	P0C0L5	0.722218	0.722218	5.68873e-11	2.67672e-10	44	P0C0L5	C4B	Complement C4-B	CO4B_HUMAN	1	64.9716	1.64972	Dengue	QC	NaN	NaN	NaN	22.0532	0.210569
Dengue / QC	_SVPPSASHVAPTETFTYEWTVPKEVGPTNADPVC[Carbamidomethyl (C)]LAK_	P00450	2.70392	2.70392	6.02666e-11	2.82636e-10	60	P00450	CP	Ceruloplasmin	CERU_HUMAN	1	551.568	6.51568	Dengue	QC	NaN	NaN	NaN	46.034	0.295289
Dengue / QC	_GDMFLVANLGTK_	P43251;P43251-2;P43251-3;P43251-4	0.742531	0.742531	6.11625e-11	2.85894e-10	58	P43251;P43251-2;P43251-3;P43251-4	BTD	Biotinidase;Isoform 2 of Biotinidase;Isoform 3 of Biotinidase;Isoform 4 of Biotinidase	BTD_HUMAN	1	67.3109	1.67311	Dengue	QC	NaN	NaN	NaN	46.6193	0.0996211
Dengue / QC	_LFAC[Carbamidomethyl (C)]SNK_	P06396	0.760075	0.760075	6.17181e-11	2.88018e-10	122	P06396	GSN	Gelsolin	GELS_HUMAN	1	69.3579	1.69358	Dengue	QC	NaN	NaN	NaN	111.761	0.104353
Dengue / QC	_GSWYSMRK_	P02675	2.74933	2.74933	6.33428e-11	2.94632e-10	36	P02675	FGB	Fibrinogen beta chain	FIBB_HUMAN	1	572.405	6.72405	Dengue	QC	NaN	NaN	NaN	27.5338	0.251649
Dengue / QC	_M[Oxidation (M)]YYSAVEPTKDIFTGLIGPMK_	E9PFZ2	0.757709	0.757709	6.48436e-11	3.00874e-10	88	E9PFZ2	CP	Ceruloplasmin	E9PFZ2_HUMAN	1	69.0804	1.6908	Dengue	QC	NaN	NaN	NaN	59.053	0.211332
Dengue / QC	_AHYGGFTVQNEANK_	P02675	3.00083	3.00083	6.56236e-11	3.0375e-10	68	P02675	FGB	Fibrinogen beta chain	FIBB_HUMAN	1	700.461	8.00461	Dengue	QC	NaN	NaN	NaN	49.9995	0.304386
Dengue / QC	_FGMHFC[Carbamidomethyl (C)]GGTLISPEWVLTAAHC[Carbamidomethyl (C)]LEK_	P00747	0.623207	0.623207	6.63266e-11	3.06504e-10	158	P00747	PLG	Plasminogen	PLMN_HUMAN	1	54.0296	1.5403	Dengue	QC	NaN	NaN	NaN	95.5966	0.0930593
Dengue / QC	_FTVDRPFLFLIYEHR_	P05546	0.958402	0.958402	6.67213e-11	3.07828e-10	146	P05546	SERPIND1	Heparin cofactor 2	HEP2_HUMAN	1	94.3156	1.94316	Dengue	QC	NaN	NaN	NaN	96.7213	0.116259
Dengue / QC	_AKM[Oxidation (M)]GNFPWQVFTNIHGR_	B4DPQ0	-0.142556	0.142556	6.7914e-11	3.13076e-10	28	B4DPQ0	C1R	Complement C1r subcomponent	B4DPQ0_HUMAN	1	-9.40874	0.905913	Dengue	QC	NaN	NaN	NaN	13.3014	0.340057
Dengue / QC	_GSVFLRNPSRNNVPC[Carbamidomethyl (C)]SPK_	P0C0L5	1.08227	1.08227	6.97169e-11	3.19573e-10	114	P0C0L5	C4B	Complement C4-B	CO4B_HUMAN	1	111.736	2.11736	Dengue	QC	NaN	NaN	NaN	89.3344	0.132217
Dengue / QC	_C[Carbamidomethyl (C)]C[Carbamidomethyl (C)]VEC[Carbamidomethyl (C)]PPC[Carbamidomethyl (C)]PAPPVAGPSVFLFPPKPKDTLM[Oxidation (M)]ISR_	P01859	5.43918	5.43918	6.96632e-11	3.19573e-10	18	P01859	IGHG2	Immunoglobulin heavy constant gamma 2	IGHG2_HUMAN	1	4238.68	43.3868	Dengue	QC	NaN	NaN	NaN	12.0442	0.21342
Dengue / QC	_QDGSVDFGR_	P02675	2.75561	2.75561	6.9961e-11	3.20434e-10	126	P02675	FGB	Fibrinogen beta chain	FIBB_HUMAN	1	575.339	6.75339	Dengue	QC	NaN	NaN	NaN	109.747	0.341961
Dengue / QC	_M[Oxidation (M)]KPVPDLVPGNFK_	P02671	3.78023	3.78023	7.13625e-11	3.26064e-10	30	P02671	FGA	Fibrinogen alpha chain	FIBA_HUMAN	1	1273.93	13.7393	Dengue	QC	NaN	NaN	NaN	16.6125	0.201601
Dengue / QC	_RIHEDSDSALQLQDFYQEVANPLLTAVTFEYPSNAVEEVTQNNFR_	Q14624	1.02807	1.02807	7.31151e-11	3.33536e-10	166	Q14624	ITIH4	Inter-alpha-trypsin inhibitor heavy chain H4	ITIH4_HUMAN	1	103.93	2.0393	Dengue	QC	NaN	NaN	NaN	63.8033	0.133094
Dengue / QC	_AFWLDVSHNR_	P35858;P35858-2	0.797723	0.797723	7.51591e-11	3.42311e-10	44	P35858;P35858-2	IGFALS	Insulin-like growth factor-binding protein complex acid labile subunit;Isoform 2 of Insulin-like growth factor-binding protein complex acid labile subunit	ALS_HUMAN	1	73.8355	1.73836	Dengue	QC	NaN	NaN	NaN	22.672	0.0975003
Dengue / QC	_AALGKLPQQANDYLNSFNWER_	P04114	1.36634	1.36634	7.80453e-11	3.54887e-10	52	P04114	APOB	Apolipoprotein B-100	APOB_HUMAN	1	157.815	2.57815	Dengue	QC	NaN	NaN	NaN	12.8854	0.0998034
Dengue / QC	_TPC[Carbamidomethyl (C)]TVSC[Carbamidomethyl (C)]NIPVVSGKEC[Carbamidomethyl (C)]EEIIRK_	P02675	2.94814	2.94814	7.91271e-11	3.59232e-10	84	P02675	FGB	Fibrinogen beta chain	FIBB_HUMAN	1	671.755	7.71755	Dengue	QC	NaN	NaN	NaN	63.7463	0.326211
Dengue / QC	_DSSTWLTAFVLKVLSLAQEQVGGSPEK_	A0A140TA49	1.07417	1.07417	7.93416e-11	3.59918e-10	70	A0A140TA49	C4A	Complement C4-A	A0A140TA49_HUMAN	1	110.552	2.10552	Dengue	QC	NaN	NaN	NaN	50.4054	0.171531
Dengue / QC	_TPENFPC[Carbamidomethyl (C)]KNLDENYC[Carbamidomethyl (C)]R_	P00747	1.87114	1.87114	7.95063e-11	3.60378e-10	46	P00747	PLG	Plasminogen	PLMN_HUMAN	1	265.822	3.65822	Dengue	QC	NaN	NaN	NaN	38.9096	0.182595
Dengue / QC	_VRAATVGSLAGQPLQER_	P02649	0.787329	0.787329	8.56091e-11	3.86192e-10	72	P02649	APOE	Apolipoprotein E	APOE_HUMAN	1	72.5876	1.72588	Dengue	QC	NaN	NaN	NaN	49.467	0.137929
Dengue / QC	_SMGGKEDLIWELLNQAQEHFGKDK_	P02787	0.511231	0.511231	8.83899e-11	3.98105e-10	176	P02787	TF	Serotransferrin	TRFE_HUMAN	1	42.5265	1.42527	Dengue	QC	NaN	NaN	NaN	110.12	0.0767123
Dengue / QC	_VADALTNAVAHVDDMPNALSALSDLHAHK_	P69905	0.646808	0.646808	9.02461e-11	4.04542e-10	166	P69905	HBA1	Hemoglobin subunit alpha	HBA_HUMAN	1	56.57	1.5657	Dengue	QC	NaN	NaN	NaN	150.876	0.0678706
Dengue / QC	_AQTTVTC[Carbamidomethyl (C)]TEK_	Q02985;Q02985-2	0.999568	0.999568	9.1857e-11	4.11438e-10	68	Q02985;Q02985-2	CFHR3	Complement factor H-related protein 3;Isoform 2 of Complement factor H-related protein 3	FHR3_HUMAN	1	99.9402	1.9994	Dengue	QC	NaN	NaN	NaN	52.6034	0.137767
Dengue / QC	_HYEGSTVPEKKTPK_	P00738	4.94055	4.94055	9.34429e-11	4.17555e-10	24	P00738	HP	Haptoglobin	HPT_HUMAN	1	2970.81	30.7081	Dengue	QC	NaN	NaN	NaN	18.2517	0.275612
Dengue / QC	_NRNVHSGSTFFKYYLQGAK_	Q14624	1.70213	1.70213	9.56447e-11	4.27058e-10	42	Q14624	ITIH4	Inter-alpha-trypsin inhibitor heavy chain H4	ITIH4_HUMAN	1	225.38	3.2538	Dengue	QC	NaN	NaN	NaN	35.8235	0.198727
Dengue / QC	_DC[Carbamidomethyl (C)]NTC[Carbamidomethyl (C)]IC[Carbamidomethyl (C)]R_	P04275	1.49177	1.49177	9.68986e-11	4.31978e-10	42	P04275	VWF	von Willebrand factor	VWF_HUMAN	1	181.233	2.81233	Dengue	QC	NaN	NaN	NaN	36.2968	0.180425
Dengue / QC	_KKTDELPQLVTLPHPNLHGPEILDVPSTVQK_	P02751;P02751-15;P02751-3;P02751-7	0.586887	0.586887	9.7427e-11	4.33993e-10	142	P02751;P02751-15;P02751-3;P02751-7	FN1	Fibronectin;Isoform 15 of Fibronectin;Isoform 3 of Fibronectin;Isoform 7 of Fibronectin	FINC_HUMAN	1	50.2002	1.502	Dengue	QC	NaN	NaN	NaN	121.935	0.0847211
Dengue / QC	_SDLGC[Carbamidomethyl (C)]GAGGGLNNANVFHLAGLTFLTNANADDSQENDEPC[Carbamidomethyl (C)]KEILRPR_	P01031	0.644014	0.644014	9.85717e-11	4.38405e-10	74	P01031	C5	Complement C5	CO5_HUMAN	1	56.267	1.56267	Dengue	QC	NaN	NaN	NaN	55.706	0.0811223
Dengue / QC	_FPSGTFEQVSQLVK_	P02774;P02774-3	0.692219	0.692219	1.05189e-10	4.66742e-10	60	P02774;P02774-3	GC	Vitamin D-binding protein;Isoform 3 of Vitamin D-binding protein	VTDB_HUMAN	1	61.5767	1.61577	Dengue	QC	NaN	NaN	NaN	46.7682	0.0795995
Dengue / QC	_MADEAGSEADHEGTHSTKR_	P02671	2.11937	2.11937	1.19006e-10	5.26814e-10	172	P02671	FGA	Fibrinogen alpha chain	FIBA_HUMAN	1	334.503	4.34503	Dengue	QC	NaN	NaN	NaN	123.048	0.261746
Dengue / QC	_TAGWNIPMGLLYNKINHC[Carbamidomethyl (C)]RFDEFFSEGC[Carbamidomethyl (C)]APGSK_	P02787	0.847138	0.847138	1.20032e-10	5.30945e-10	176	P02787	TF	Serotransferrin	TRFE_HUMAN	1	79.8929	1.79893	Dengue	QC	NaN	NaN	NaN	153.407	0.0935238
Dengue / QC	_NYC[Carbamidomethyl (C)]GLPGEYWLGNDK_	P02675	1.98363	1.98363	1.21042e-10	5.34577e-10	84	P02675	FGB	Fibrinogen beta chain	FIBB_HUMAN	1	295.486	3.95486	Dengue	QC	NaN	NaN	NaN	73.5117	0.252778
Dengue / QC	_IVLVDNKC[Carbamidomethyl (C)]K_	P01591	3.87736	3.87736	1.28906e-10	5.6667e-10	20	P01591	JCHAIN	Immunoglobulin J chain	IGJ_HUMAN	1	1369.61	14.6961	Dengue	QC	NaN	NaN	NaN	14.0502	0.357848
Dengue / QC	_VLDAVRGSPAINVAVHVFRK_	P02766	1.3503	1.3503	1.29016e-10	5.66715e-10	74	P02766	TTR	Transthyretin	TTHY_HUMAN	1	154.965	2.54965	Dengue	QC	NaN	NaN	NaN	61.1672	0.156582
Dengue / QC	_ILSVKGLLVGEILSAVLSQEGINILTHLPK_	P01031	1.42072	1.42072	1.31965e-10	5.78324e-10	62	P01031	C5	Complement C5	CO5_HUMAN	1	167.72	2.6772	Dengue	QC	NaN	NaN	NaN	50.0964	0.155983
Dengue / QC	_TLM[Oxidation (M)]FGSYLDDEKNWGLSFYADKPETTK_	P19652	0.484057	0.484057	1.3541e-10	5.9069e-10	92	P19652	ORM2	Alpha-1-acid glycoprotein 2	A1AG2_HUMAN	1	39.8671	1.39867	Dengue	QC	NaN	NaN	NaN	68.3042	0.170753
Dengue / QC	_LKC[Carbamidomethyl (C)]QPVDC[Carbamidomethyl (C)]GIPESIENGKVEDPESTLFGSVIR_	P09871	2.03569	2.03569	1.40693e-10	6.12326e-10	40	P09871	C1S	Complement C1s subcomponent	C1S_HUMAN	1	310.019	4.10019	Dengue	QC	NaN	NaN	NaN	30.885	0.230317
Dengue / QC	_KVFLDC[Carbamidomethyl (C)]C[Carbamidomethyl (C)]NYITELRR_	P01024	0.618319	0.618319	1.59335e-10	6.87667e-10	68	P01024	C3	Complement C3	CO3_HUMAN	1	53.5085	1.53509	Dengue	QC	NaN	NaN	NaN	59.1747	0.0901871
Dengue / QC	_EDLIWELLNQAQEHFGK_	P02787	0.991882	0.991882	1.60347e-10	6.9151e-10	146	P02787	TF	Serotransferrin	TRFE_HUMAN	1	98.8777	1.98878	Dengue	QC	NaN	NaN	NaN	122.938	0.120336
Dengue / QC	_VADALTNAVAHVDDMPNALSALSDLHAHKLR_	P69905	1.41484	1.41484	1.62498e-10	7.00255e-10	76	P69905	HBA1	Hemoglobin subunit alpha	HBA_HUMAN	1	166.631	2.66631	Dengue	QC	NaN	NaN	NaN	49.4718	0.126011
Dengue / QC	_VFLDC[Carbamidomethyl (C)]C[Carbamidomethyl (C)]NYITELR_	P01024	0.721788	0.721788	1.66636e-10	7.1646e-10	104	P01024	C3	Complement C3	CO3_HUMAN	1	64.9224	1.64922	Dengue	QC	NaN	NaN	NaN	93.2004	0.112966
Dengue / QC	_NGFKSHALQLNNR_	P0C0L5	3.02133	3.02133	1.73395e-10	7.42151e-10	52	P0C0L5	C4B	Complement C4-B	CO4B_HUMAN	1	711.916	8.11916	Dengue	QC	NaN	NaN	NaN	41.6349	0.277327
Dengue / QC	_NAIGGKFPLYNLGFGNNLNYNFLENMALENHGFARR_	Q06033;Q06033-2	2.44452	2.44452	1.76163e-10	7.52863e-10	38	Q06033;Q06033-2	ITIH3	Inter-alpha-trypsin inhibitor heavy chain H3;Isoform 2 of Inter-alpha-trypsin inhibitor heavy chain H3	ITIH3_HUMAN	1	444.344	5.44344	Dengue	QC	NaN	NaN	NaN	25.9845	0.23293
Dengue / QC	_SWFEPLVEDMQR_	P02649	1.67022	1.67022	1.78155e-10	7.60236e-10	22	P02649	APOE	Apolipoprotein E	APOE_HUMAN	1	218.263	3.18263	Dengue	QC	NaN	NaN	NaN	16.889	0.107264
Dengue / QC	_C[Carbamidomethyl (C)]LVNLIEK_	B4E1Z4	0.417374	0.417374	1.82641e-10	7.78793e-10	84	B4E1Z4	NaN	cDNA FLJ55673, highly similar to Complement factor B (EC 3.4.21.47)	B4E1Z4_HUMAN	1	33.5495	1.33549	Dengue	QC	NaN	NaN	NaN	68.3921	0.0691578
Dengue / QC	_DNC[Carbamidomethyl (C)]C[Carbamidomethyl (C)]ILDER_	P02679	2.88912	2.88912	1.89144e-10	8.0411e-10	144	P02679	FGG	Fibrinogen gamma chain	FIBG_HUMAN	1	640.818	7.40818	Dengue	QC	NaN	NaN	NaN	115.383	0.376101
Dengue / QC	_LWAYLTIQELLAK_	P19827	0.995777	0.995777	1.91034e-10	8.10933e-10	110	P19827	ITIH1	Inter-alpha-trypsin inhibitor heavy chain H1	ITIH1_HUMAN	1	99.4154	1.99415	Dengue	QC	NaN	NaN	NaN	77.0562	0.155562
Dengue / QC	_VNWEEEAASGLLTSLKDNVPK_	P04114	0.613316	0.613316	1.92924e-10	8.17732e-10	114	P04114	APOB	Apolipoprotein B-100	APOB_HUMAN	1	52.9771	1.52977	Dengue	QC	NaN	NaN	NaN	68.815	0.0909097
Dengue / QC	_ALVQQMEQLR_	P06727	0.772004	0.772004	1.97929e-10	8.37698e-10	112	P06727	APOA4	Apolipoprotein A-IV	APOA4_HUMAN	1	70.764	1.70764	Dengue	QC	NaN	NaN	NaN	94.992	0.121757
Dengue / QC	_YGIDWASGR_	O75636	-0.679696	0.679696	2.0869e-10	8.81271e-10	170	O75636	FCN3	Ficolin-3	FCN3_HUMAN	1	-37.5703	0.624297	Dengue	QC	NaN	NaN	NaN	57.4209	0.0904624
Dengue / QC	_TFVLNFIK_	E7END6;P04070;P04070-2	0.868363	0.868363	2.11224e-10	8.91314e-10	26	E7END6;P04070;P04070-2	PROC	Vitamin K-dependent protein C;Vitamin K-dependent protein C;Isoform 2 of Vitamin K-dependent protein C	E7END6_HUMAN;PROC_HUMAN;PROC_HUMAN	1	82.559	1.82559	Dengue	QC	NaN	NaN	NaN	15.1101	0.114946
Dengue / QC	_SAVTALWGKVNVDEVGGEALGR_	P68871	0.875155	0.875155	2.15433e-10	9.07053e-10	162	P68871	HBB	Hemoglobin subunit beta	HBB_HUMAN	1	83.4205	1.8342	Dengue	QC	NaN	NaN	NaN	129.47	0.131754
Dengue / QC	_VQFELHYQEVKWR_	P19823	3.25203	3.25203	2.22629e-10	9.34583e-10	20	P19823	ITIH2	Inter-alpha-trypsin inhibitor heavy chain H2	ITIH2_HUMAN	1	852.703	9.52703	Dengue	QC	NaN	NaN	NaN	15.3513	0.189558
Dengue / QC	_LWLEGNPWDC[Carbamidomethyl (C)]GC[Carbamidomethyl (C)]PLK_	P35858;P35858-2	0.554658	0.554658	2.3499e-10	9.82844e-10	128	P35858;P35858-2	IGFALS	Insulin-like growth factor-binding protein complex acid labile subunit;Isoform 2 of Insulin-like growth factor-binding protein complex acid labile subunit	ALS_HUMAN	1	46.882	1.46882	Dengue	QC	NaN	NaN	NaN	96.2055	0.0792101
Dengue / QC	_ILEGFQPSGR_	P80108	0.44543	0.44543	2.36595e-10	9.8883e-10	122	P80108	GPLD1	Phosphatidylinositol-glycan-specific phospholipase D	PHLD_HUMAN	1	36.172	1.36172	Dengue	QC	NaN	NaN	NaN	100.231	0.0570515
Dengue / QC	_YILQGVTSWGLGC[Carbamidomethyl (C)]ARPNKPGVYVR_	P00747	0.870193	0.870193	2.3899e-10	9.97895e-10	52	P00747	PLG	Plasminogen	PLMN_HUMAN	1	82.7907	1.82791	Dengue	QC	NaN	NaN	NaN	31.5543	0.0802298
Dengue / QC	_AQMDLSGR_	P00488	2.654	2.654	2.39116e-10	9.97895e-10	24	P00488	F13A1	Coagulation factor XIII A chain	F13A_HUMAN	1	529.409	6.29409	Dengue	QC	NaN	NaN	NaN	18.379	0.218713
Dengue / QC	_YPLYVLK_	A0A087WSY5;Q96IY4	0.992182	0.992182	2.41839e-10	1.00852e-09	46	A0A087WSY5;Q96IY4	CPB2	Carboxypeptidase B2	A0A087WSY5_HUMAN;CBPB2_HUMAN	1	98.9192	1.98919	Dengue	QC	NaN	NaN	NaN	38.0768	0.103615
Dengue / QC	_SQPM[Oxidation (M)]GLWR_	P25311	1.58574	1.58574	2.53279e-10	1.0493e-09	54	P25311	AZGP1	Zinc-alpha-2-glycoprotein	ZA2G_HUMAN	1	200.162	3.00162	Dengue	QC	NaN	NaN	NaN	45.727	0.186415
Dengue / QC	_GSFQC[Carbamidomethyl (C)]GPC[Carbamidomethyl (C)]QPGFVGDQASGC[Carbamidomethyl (C)]QR_	G3XAP6;P49747	1.46653	1.46653	2.54701e-10	1.05442e-09	50	G3XAP6;P49747	COMP	Cartilage oligomeric matrix protein	G3XAP6_HUMAN;COMP_HUMAN	1	176.356	2.76356	Dengue	QC	NaN	NaN	NaN	40.3366	0.199718
Dengue / QC	_LNILNNNYK_	O14791;O14791-2	0.520623	0.520623	2.66386e-10	1.09661e-09	132	O14791;O14791-2	APOL1	Apolipoprotein L1;Isoform 2 of Apolipoprotein L1	APOL1_HUMAN	1	43.4574	1.43457	Dengue	QC	NaN	NaN	NaN	116.681	0.078699
Dengue / QC	_INHGILYDEEKYKPFSQVPTGEVFYYSC[Carbamidomethyl (C)]EYNFVSPSK_	Q03591	1.0842	1.0842	2.66435e-10	1.09661e-09	74	Q03591	CFHR1	Complement factor H-related protein 1	FHR1_HUMAN	1	112.021	2.12021	Dengue	QC	NaN	NaN	NaN	59.4	0.132386
Dengue / QC	_THTC[Carbamidomethyl (C)]PPC[Carbamidomethyl (C)]PAPELLGGPSVFLFPPKPKDTLMISR_	P01857	2.75047	2.75047	2.77815e-10	1.14077e-09	72	P01857	IGHG1	Immunoglobulin heavy constant gamma 1	IGHG1_HUMAN	1	572.935	6.72935	Dengue	QC	NaN	NaN	NaN	59.1062	0.281734
Dengue / QC	_SYTVAIAGYALAQMGRLKGPLLNK_	P01024	0.722923	0.722923	2.77967e-10	1.14077e-09	124	P01024	C3	Complement C3	CO3_HUMAN	1	65.0523	1.65052	Dengue	QC	NaN	NaN	NaN	74.8321	0.0887443
Dengue / QC	_C[Carbamidomethyl (C)]C[Carbamidomethyl (C)]QDGVTR_	P0C0L5	0.728484	0.728484	2.82049e-10	1.15585e-09	134	P0C0L5	C4B	Complement C4-B	CO4B_HUMAN	1	65.6897	1.6569	Dengue	QC	NaN	NaN	NaN	97.1121	0.109045
Dengue / QC	_QLFALYSGNDVTDISDDRFPKPPEIANGYVEHLFR_	P00739	1.70129	1.70129	2.87825e-10	1.17783e-09	32	P00739	HPR	Haptoglobin-related protein	HPTR_HUMAN	1	225.192	3.25192	Dengue	QC	NaN	NaN	NaN	22.673	0.157349
Dengue / QC	_ILGEELGFASLHDLQLLGK_	P04114	0.876426	0.876426	2.93557e-10	1.19955e-09	84	P04114	APOB	Apolipoprotein B-100	APOB_HUMAN	1	83.5822	1.83582	Dengue	QC	NaN	NaN	NaN	65.5474	0.115119
Dengue / QC	_QGFGNVATNTDGKNYC[Carbamidomethyl (C)]GLPGEYWLGNDKISQLTR_	P02675	1.93716	1.93716	2.98587e-10	1.21836e-09	40	P02675	FGB	Fibrinogen beta chain	FIBB_HUMAN	1	282.95	3.8295	Dengue	QC	NaN	NaN	NaN	33.1991	0.205966
Dengue / QC	_YLFPGEC[Carbamidomethyl (C)]QYVLVQDYC[Carbamidomethyl (C)]GSNPGTFR_	P04275	1.32794	1.32794	3.05838e-10	1.24526e-09	68	P04275	VWF	von Willebrand factor	VWF_HUMAN	1	151.043	2.51043	Dengue	QC	NaN	NaN	NaN	63.9391	0.196978
Dengue / QC	_ATGVLYDYVNK_	P04114	0.712557	0.712557	3.08475e-10	1.2551e-09	32	P04114	APOB	Apolipoprotein B-100	APOB_HUMAN	1	63.8706	1.63871	Dengue	QC	NaN	NaN	NaN	26.0725	0.0788602
Dengue / QC	_TPC[Carbamidomethyl (C)]TVSC[Carbamidomethyl (C)]NIPVVSGK_	P02675	2.40862	2.40862	3.11661e-10	1.26625e-09	132	P02675	FGB	Fibrinogen beta chain	FIBB_HUMAN	1	430.965	5.30965	Dengue	QC	NaN	NaN	NaN	111.565	0.32728
Dengue / QC	_EESPLLIGQQSTVSDVPRDLEVVAATPTSLLISWDAPAVTVR_	P02751;P02751-15;P02751-3;P02751-7	0.931987	0.931987	3.15217e-10	1.27978e-09	104	P02751;P02751-15;P02751-3;P02751-7	FN1	Fibronectin;Isoform 15 of Fibronectin;Isoform 3 of Fibronectin;Isoform 7 of Fibronectin	FINC_HUMAN	1	90.7902	1.9079	Dengue	QC	NaN	NaN	NaN	44.8302	0.191217
Dengue / QC	_ASQHGSDVVIETDFGLR_	Q9Y6R7	1.71548	1.71548	3.17229e-10	1.28703e-09	88	Q9Y6R7	FCGBP	IgGFc-binding protein	FCGBP_HUMAN	1	228.405	3.28405	Dengue	QC	NaN	NaN	NaN	72.3846	0.225655
Dengue / QC	_ATAVVDGAFK_	P32119	0.816943	0.816943	3.29131e-10	1.33437e-09	50	P32119	PRDX2	Peroxiredoxin-2	PRDX2_HUMAN	1	76.1669	1.76167	Dengue	QC	NaN	NaN	NaN	31.7904	0.111396
Dengue / QC	_DKDQEVLLQTFLDDASPGDK_	P04114	0.92135	0.92135	3.38448e-10	1.37018e-09	78	P04114	APOB	Apolipoprotein B-100	APOB_HUMAN	1	89.3886	1.89389	Dengue	QC	NaN	NaN	NaN	36.8246	0.0994045
Dengue / QC	_LTIFKTELR_	P04114	1.04361	1.04361	3.41929e-10	1.38329e-09	144	P04114	APOB	Apolipoprotein B-100	APOB_HUMAN	1	106.138	2.06138	Dengue	QC	NaN	NaN	NaN	133.062	0.149315
Dengue / QC	_QSM[Oxidation (M)]TLSSEVQIPDFDVDLGTILR_	P04114	1.40627	1.40627	3.43969e-10	1.39055e-09	100	P04114	APOB	Apolipoprotein B-100	APOB_HUMAN	1	165.051	2.65051	Dengue	QC	NaN	NaN	NaN	18.9291	0.0850197
Dengue / QC	_LTVSIEAR_	P22792	0.443529	0.443529	3.46817e-10	1.39936e-09	152	P22792	CPN2	Carboxypeptidase N subunit 2	CPN2_HUMAN	1	35.9927	1.35993	Dengue	QC	NaN	NaN	NaN	99.2682	0.0730159
Dengue / QC	_VTASSPVAVLSGHSC[Carbamidomethyl (C)]AQK_	Q9Y6R7	1.43924	1.43924	3.62371e-10	1.45563e-09	58	Q9Y6R7	FCGBP	IgGFc-binding protein	FCGBP_HUMAN	1	171.178	2.71178	Dengue	QC	NaN	NaN	NaN	48.3125	0.19339
Dengue / QC	_DQYKVGEVLK_	P08603	0.821717	0.821717	3.69304e-10	1.48034e-09	124	P08603	CFH	Complement factor H	CFAH_HUMAN	1	76.7508	1.76751	Dengue	QC	NaN	NaN	NaN	87.757	0.109929
Dengue / QC	_TFYEPGEEITYSC[Carbamidomethyl (C)]K_	P02749	0.714709	0.714709	3.7352e-10	1.49513e-09	72	P02749	APOH	Beta-2-glycoprotein 1	APOH_HUMAN	1	64.1152	1.64115	Dengue	QC	NaN	NaN	NaN	57.0834	0.0898116
Dengue / QC	_FC[Carbamidomethyl (C)]EAEFSVK_	Q16610	1.19202	1.19202	3.89352e-10	1.55522e-09	60	Q16610	ECM1	Extracellular matrix protein 1	ECM1_HUMAN	1	128.473	2.28473	Dengue	QC	NaN	NaN	NaN	52.5597	0.16439
Dengue / QC	_DFALQNPSAVPR_	P35858;P35858-2	0.421947	0.421947	3.95687e-10	1.57941e-09	120	P35858;P35858-2	IGFALS	Insulin-like growth factor-binding protein complex acid labile subunit;Isoform 2 of Insulin-like growth factor-binding protein complex acid labile subunit	ALS_HUMAN	1	33.9734	1.33973	Dengue	QC	NaN	NaN	NaN	111.466	0.0694316
Dengue / QC	_TMFIGGSQLSQK_	P80108	1.35141	1.35141	4.02441e-10	1.60187e-09	24	P80108	GPLD1	Phosphatidylinositol-glycan-specific phospholipase D	PHLD_HUMAN	1	155.162	2.55162	Dengue	QC	NaN	NaN	NaN	15.5221	0.115438
Dengue / QC	_RIPLYYPNAGLTR_	P08519	1.89862	1.89862	4.11925e-10	1.6339e-09	110	P08519	LPA	Apolipoprotein(a)	APOA_HUMAN	1	272.857	3.72857	Dengue	QC	NaN	NaN	NaN	73.0046	0.25724
Dengue / QC	_AGAEPASER_	P01042-2	1.49894	1.49894	4.12427e-10	1.63475e-09	88	P01042-2	KNG1	Isoform LMW of Kininogen-1	KNG1_HUMAN	1	182.635	2.82635	Dengue	QC	NaN	NaN	NaN	54.3168	0.172327
Dengue / QC	_IIAPPERK_	P60709	2.23232	2.23232	4.14328e-10	1.64114e-09	38	P60709	ACTB	Actin, cytoplasmic 1	ACTB_HUMAN	1	369.887	4.69887	Dengue	QC	NaN	NaN	NaN	29.4296	0.400336
Dengue / QC	_KHY[Sulfation (Y)]LMWGLSSDFWGEKPNLSY[Sulfation (Y)]IIGK_	P01024	2.19609	2.19609	4.18486e-10	1.6553e-09	42	P01024	C3	Complement C3	CO3_HUMAN	1	358.236	4.58236	Dengue	QC	NaN	NaN	NaN	31.2323	0.271745
Dengue / QC	_SRLSSGLVTAALYGR_	P43251;P43251-2;P43251-3;P43251-4	0.414949	0.414949	4.1882e-10	1.65547e-09	122	P43251;P43251-2;P43251-3;P43251-4	BTD	Biotinidase;Isoform 2 of Biotinidase;Isoform 3 of Biotinidase;Isoform 4 of Biotinidase	BTD_HUMAN	1	33.3251	1.33325	Dengue	QC	NaN	NaN	NaN	92.451	0.122559
Dengue / QC	_KLFDYC[Carbamidomethyl (C)]DIPLC[Carbamidomethyl (C)]ASSSFDC[Carbamidomethyl (C)]GKPQVEPK_	P08519	1.69787	1.69787	4.54065e-10	1.78239e-09	50	P08519	LPA	Apolipoprotein(a)	APOA_HUMAN	1	224.421	3.24421	Dengue	QC	NaN	NaN	NaN	41.9484	0.219983
Dengue / QC	_IQLVEEELDRAQER_	P67936	1.04654	1.04654	4.66069e-10	1.82573e-09	92	P67936	TPM4	Tropomyosin alpha-4 chain	TPM4_HUMAN	1	106.556	2.06556	Dengue	QC	NaN	NaN	NaN	67.506	0.160954
Dengue / QC	_GDDITMVLILPKPEK_	P01008	0.912097	0.912097	4.96543e-10	1.93843e-09	70	P01008	SERPINC1	Antithrombin-III	ANT3_HUMAN	1	88.1778	1.88178	Dengue	QC	NaN	NaN	NaN	65.3739	0.142578
Dengue / QC	_EYC[Carbamidomethyl (C)]GVPGDGDEELLRFSN_	P02760	2.31979	2.31979	5.03795e-10	1.96539e-09	44	P02760	AMBP	Protein AMBP	AMBP_HUMAN	1	399.261	4.99261	Dengue	QC	NaN	NaN	NaN	36.6929	0.252834
Dengue / QC	_LTYTNWNEGEPNNAGSDEDC[Carbamidomethyl (C)]VLLLK_	P11226	1.46524	1.46524	5.08718e-10	1.97916e-09	50	P11226	MBL2	Mannose-binding protein C	MBL2_HUMAN	1	176.109	2.76109	Dengue	QC	NaN	NaN	NaN	33.3313	0.150268
Dengue / QC	_DAHLTWEVAGK_	A0A0A0MS09;P01880;P01880-2	1.60908	1.60908	5.13393e-10	1.99598e-09	24	A0A0A0MS09;P01880;P01880-2	IGHD	Immunoglobulin heavy constant delta (Fragment);Immunoglobulin heavy constant delta;Isoform 2 of Immunoglobulin heavy constant delta	A0A0A0MS09_HUMAN;IGHD_HUMAN;IGHD_HUMAN	1	205.058	3.05058	Dengue	QC	NaN	NaN	NaN	15.0355	0.185792
Dengue / QC	_HSTFIPGTNK_	P08519	1.02866	1.02866	5.20052e-10	2.02049e-09	66	P08519	LPA	Apolipoprotein(a)	APOA_HUMAN	1	104.013	2.04013	Dengue	QC	NaN	NaN	NaN	56.7651	0.152223
Dengue / QC	_LGFTDLFSK_	P29622	0.419879	0.419879	5.23812e-10	2.03232e-09	74	P29622	SERPINA4	Kallistatin	KAIN_HUMAN	1	33.7815	1.33782	Dengue	QC	NaN	NaN	NaN	47.1079	0.0986856
Dengue / QC	_TLADLTLLDSPIK_	P04114	0.47974	0.47974	5.31753e-10	2.05891e-09	132	P04114	APOB	Apolipoprotein B-100	APOB_HUMAN	1	39.4492	1.39449	Dengue	QC	NaN	NaN	NaN	78.5494	0.0739246
Dengue / QC	_EPQVYTLPPSQEEMTKNQVSLTC[Carbamidomethyl (C)]LVK_	P01861	1.02375	1.02375	5.36763e-10	2.07689e-09	132	P01861	IGHG4	Immunoglobulin heavy constant gamma 4	IGHG4_HUMAN	1	103.32	2.0332	Dengue	QC	NaN	NaN	NaN	108.281	0.12613
Dengue / QC	_C[Carbamidomethyl (C)]NLLAEKQYGFC[Carbamidomethyl (C)]K_	P02765	1.7513	1.7513	5.46365e-10	2.11117e-09	148	P02765	AHSG	Alpha-2-HS-glycoprotein	FETUA_HUMAN	1	236.663	3.36663	Dengue	QC	NaN	NaN	NaN	118.725	0.233903
Dengue / QC	_LQDAEIAR_	P06703;R4GN98	1.64649	1.64649	5.48041e-10	2.11621e-09	24	P06703;R4GN98	S100A6	Protein S100-A6;Protein S100 (Fragment)	S10A6_HUMAN;R4GN98_HUMAN	1	213.072	3.13072	Dengue	QC	NaN	NaN	NaN	18.4347	0.122727
Dengue / QC	_WERPFEVKDTEEEDFHVDQVTTVK_	P01009	0.930923	0.930923	5.50611e-10	2.12469e-09	80	P01009	SERPINA1	Alpha-1-antitrypsin	A1AT_HUMAN	1	90.6495	1.9065	Dengue	QC	NaN	NaN	NaN	60.4002	0.125768
Dengue / QC	_GC[Carbamidomethyl (C)]PAALPLSNLYETLGVVGSTTTQLYTDR_	Q15582	0.91714	0.91714	5.84384e-10	2.24283e-09	48	Q15582	TGFBI	Transforming growth factor-beta-induced protein ig-h3	BGH3_HUMAN	1	88.8368	1.88837	Dengue	QC	NaN	NaN	NaN	39.2684	0.135476
Dengue / QC	_C[Carbamidomethyl (C)]QHEMDQYWGIGSLASGINLFTNSFEGPVLDHR_	P07358	0.736205	0.736205	5.89856e-10	2.26231e-09	88	P07358	C8B	Complement component C8 beta chain	CO8B_HUMAN	1	66.5788	1.66579	Dengue	QC	NaN	NaN	NaN	28.8039	0.109926
Dengue / QC	_VQLSNDFDEYIM[Oxidation (M)]AIEQTIKSGSDEVQVGQQR_	P01024	1.93834	1.93834	6.12991e-10	2.34787e-09	40	P01024	C3	Complement C3	CO3_HUMAN	1	283.264	3.83264	Dengue	QC	NaN	NaN	NaN	23.7337	0.398121
Dengue / QC	_TYM[Oxidation (M)]LAFDVNDEKNWGLSVYADKPETTK_	P02763	1.94021	1.94021	6.18126e-10	2.36595e-09	98	P02763	ORM1	Alpha-1-acid glycoprotein 1	A1AG1_HUMAN	1	283.762	3.83762	Dengue	QC	NaN	NaN	NaN	53.9175	0.179503
Dengue / QC	_ETAVDGELVVLYDVKREEK_	P19823	0.867303	0.867303	6.55127e-10	2.49748e-09	134	P19823	ITIH2	Inter-alpha-trypsin inhibitor heavy chain H2	ITIH2_HUMAN	1	82.4249	1.82425	Dengue	QC	NaN	NaN	NaN	85.9975	0.11203
Dengue / QC	_EPC[Carbamidomethyl (C)]VESLVSQYFQTVTDYGK_	P02652;V9GYM3	0.670036	0.670036	6.85302e-10	2.60727e-09	156	P02652;V9GYM3	APOA2	Apolipoprotein A-II	APOA2_HUMAN;V9GYM3_HUMAN	1	59.1113	1.59111	Dengue	QC	NaN	NaN	NaN	122.252	0.0839638
Dengue / QC	_LHQPVVLTDHVVPLC[Carbamidomethyl (C)]LPER_	F5H8B0;P08709;P08709-2	1.09181	1.09181	6.95738e-10	2.64167e-09	30	F5H8B0;P08709;P08709-2	F7	Coagulation factor VII;Coagulation factor VII;Isoform B of Coagulation factor VII	F5H8B0_HUMAN;FA7_HUMAN;FA7_HUMAN	1	113.141	2.13141	Dengue	QC	NaN	NaN	NaN	14.4019	0.119402
Dengue / QC	_DYNLNDILLQLGIEEAFTSK_	P01011	1.44665	1.44665	6.98431e-10	2.65012e-09	140	P01011	SERPINA3	Alpha-1-antichymotrypsin	AACT_HUMAN	1	172.574	2.72574	Dengue	QC	NaN	NaN	NaN	58.9644	0.175622
Dengue / QC	_LVTDLTKVHTEC[Carbamidomethyl (C)]C[Carbamidomethyl (C)]HGDLLEC[Carbamidomethyl (C)]ADDRADLAK_	P02768	1.30697	1.30697	6.9898e-10	2.65044e-09	174	P02768	ALB	Serum albumin	ALBU_HUMAN	1	147.421	2.47421	Dengue	QC	NaN	NaN	NaN	148.972	0.194221
Dengue / QC	_QNQELKVRVELLHNPAFC[Carbamidomethyl (C)]SLATTK_	P01024	-0.270334	0.270334	7.03801e-10	2.66694e-09	32	P01024	C3	Complement C3	CO3_HUMAN	1	-17.0872	0.829128	Dengue	QC	NaN	NaN	NaN	13.811	0.36187
Dengue / QC	_ILDELLQTC[Carbamidomethyl (C)]VDPEDC[Carbamidomethyl (C)]PVC[Carbamidomethyl (C)]EVAGRR_	P04275	0.744189	0.744189	7.09549e-10	2.68693e-09	78	P04275	VWF	von Willebrand factor	VWF_HUMAN	1	67.5032	1.67503	Dengue	QC	NaN	NaN	NaN	64.5441	0.139091
Dengue / QC	_EHVAHLLFLRDTK_	P19652	1.70391	1.70391	7.30327e-10	2.76377e-09	78	P19652	ORM2	Alpha-1-acid glycoprotein 2	A1AG2_HUMAN	1	225.783	3.25783	Dengue	QC	NaN	NaN	NaN	66.4901	0.211356
Dengue / QC	_SIAYLQMNSLK_	A0A0A0MS15	-0.702768	0.702768	7.35843e-10	2.78279e-09	168	A0A0A0MS15	IGHV3-49	Immunoglobulin heavy variable 3-49	HV349_HUMAN	1	-38.5608	0.614392	Dengue	QC	NaN	NaN	NaN	71.0399	0.0938606
Dengue / QC	_C[Carbamidomethyl (C)]HAGHLNGVYYQGGTYSK_	P02679	2.4435	2.4435	7.72812e-10	2.91484e-09	42	P02679	FGG	Fibrinogen gamma chain	FIBG_HUMAN	1	443.96	5.4396	Dengue	QC	NaN	NaN	NaN	36.684	0.248266
Dengue / QC	_TPAYYPNAGLIK_	P08519	1.22318	1.22318	7.96524e-10	3.00029e-09	138	P08519	LPA	Apolipoprotein(a)	APOA_HUMAN	1	133.461	2.33461	Dengue	QC	NaN	NaN	NaN	116.653	0.193031
Dengue / QC	_ITFELVYEELLK_	Q14624	0.714722	0.714722	8.01355e-10	3.01649e-09	148	Q14624	ITIH4	Inter-alpha-trypsin inhibitor heavy chain H4	ITIH4_HUMAN	1	64.1167	1.64117	Dengue	QC	NaN	NaN	NaN	81.6222	0.133071
Dengue / QC	_C[Carbamidomethyl (C)]LLFSFLPASSINDMEKR_	H0YAC1;P03952	0.489972	0.489972	8.21229e-10	3.08517e-09	128	H0YAC1;P03952	KLKB1	Plasma kallikrein (Fragment);Plasma kallikrein	H0YAC1_HUMAN;KLKB1_HUMAN	1	40.4418	1.40442	Dengue	QC	NaN	NaN	NaN	84.6377	0.0988556
Dengue / QC	_VWVYPPEK_	P02790	1.01685	1.01685	8.50004e-10	3.18485e-09	68	P02790	HPX	Hemopexin	HEMO_HUMAN	1	102.35	2.0235	Dengue	QC	NaN	NaN	NaN	55.1635	0.165427
Dengue / QC	_NPNLPPETVDSLKNILTSNNIDVK_	P05090	0.592903	0.592903	8.60993e-10	3.21966e-09	146	P05090	APOD	Apolipoprotein D	APOD_HUMAN	1	50.8279	1.50828	Dengue	QC	NaN	NaN	NaN	115.394	0.0804229
Dengue / QC	_NPDPVAAPYC[Carbamidomethyl (C)]YTR_	P08519	1.56763	1.56763	8.63074e-10	3.22532e-09	102	P08519	LPA	Apolipoprotein(a)	APOA_HUMAN	1	196.416	2.96416	Dengue	QC	NaN	NaN	NaN	62.4534	0.157338
Dengue / QC	_LTVDKSRWQQGNVFSC[Carbamidomethyl (C)]SVMHEALHNHYTQK_	P01857	2.79898	2.79898	8.646e-10	3.2289e-09	96	P01857	IGHG1	Immunoglobulin heavy constant gamma 1	IGHG1_HUMAN	1	595.948	6.95948	Dengue	QC	NaN	NaN	NaN	81.044	0.367709
Dengue / QC	_YGQPLPGYTTK_	A6XND0;P17936;P17936-2	0.666319	0.666319	8.68552e-10	3.2394e-09	42	A6XND0;P17936;P17936-2	IGFBP3	Insulin-like growth factor-binding protein 3;Insulin-like growth factor-binding protein 3;Isoform 2 of Insulin-like growth factor-binding protein 3	A6XND0_HUMAN;IBP3_HUMAN;IBP3_HUMAN	1	58.7019	1.58702	Dengue	QC	NaN	NaN	NaN	34.8282	0.0827362
Dengue / QC	_KELFYKADGESC[Carbamidomethyl (C)]SASMMYQEGK_	P01008	-0.653867	0.653867	8.77028e-10	3.26887e-09	22	P01008	SERPINC1	Antithrombin-III	ANT3_HUMAN	1	-36.4426	0.635574	Dengue	QC	NaN	NaN	NaN	12.5824	0.352539
Dengue / QC	_QYTDSTFRVPVERK_	P00450	2.16764	2.16764	8.78351e-10	3.27165e-09	44	P00450	CP	Ceruloplasmin	CERU_HUMAN	1	349.286	4.49286	Dengue	QC	NaN	NaN	NaN	19.6227	0.193868
Dengue / QC	_TLRVQGNDHSATR_	Q14624	2.34774	2.34774	8.87276e-10	3.30273e-09	88	Q14624	ITIH4	Inter-alpha-trypsin inhibitor heavy chain H4	ITIH4_HUMAN	1	409.026	5.09026	Dengue	QC	NaN	NaN	NaN	63.6493	0.324651
Dengue / QC	_QAQQMVQPQSPVAVSQSKPGC[Carbamidomethyl (C)]YDNGK_	P02751;P02751-15;P02751-3;P02751-7	0.379748	0.379748	8.89506e-10	3.30887e-09	134	P02751;P02751-15;P02751-3;P02751-7	FN1	Fibronectin;Isoform 15 of Fibronectin;Isoform 3 of Fibronectin;Isoform 7 of Fibronectin	FINC_HUMAN	1	30.1114	1.30111	Dengue	QC	NaN	NaN	NaN	51.9129	0.55592
Dengue / QC	_QGQGQSEPGEYEQR_	P43121	0.515293	0.515293	9.13155e-10	3.39019e-09	28	P43121	MCAM	Cell surface glycoprotein MUC18	MUC18_HUMAN	1	42.9284	1.42928	Dengue	QC	NaN	NaN	NaN	21.7731	0.190152
Dengue / QC	_DGEDQTQDTELVETRPAGDGTFQK_	P05534;P30447	1.22879	1.22879	9.24162e-10	3.42434e-09	54	P05534;P30447	HLA-A	HLA class I histocompatibility antigen, A-24 alpha chain;HLA class I histocompatibility antigen, A-23 alpha chain	1A24_HUMAN;1A23_HUMAN	1	134.371	2.34371	Dengue	QC	NaN	NaN	NaN	29.2427	0.125294
Dengue / QC	_AIGYATAADC[Carbamidomethyl (C)]GR_	Q9Y6R7	1.25192	1.25192	9.28999e-10	3.44002e-09	102	Q9Y6R7	FCGBP	IgGFc-binding protein	FCGBP_HUMAN	1	138.158	2.38158	Dengue	QC	NaN	NaN	NaN	74.6906	0.195034
Dengue / QC	_TSESGELHGLTTEEEFVEGIYKVEIDTK_	P02766	1.10448	1.10448	9.36456e-10	3.46538e-09	176	P02766	TTR	Transthyretin	TTHY_HUMAN	1	115.022	2.15022	Dengue	QC	NaN	NaN	NaN	125.216	0.123533
Dengue / QC	_LVTSKGDKELR_	P02671	2.78274	2.78274	1.00932e-09	3.72087e-09	144	P02671	FGA	Fibrinogen alpha chain	FIBA_HUMAN	1	588.16	6.8816	Dengue	QC	NaN	NaN	NaN	115.247	0.386043
Dengue / QC	_VTIMWTPPESAVTGYRVDVIPVNLPGEHGQR_	P02751;P02751-15;P02751-3;P02751-7	0.380237	0.380237	1.00943e-09	3.72087e-09	148	P02751;P02751-15;P02751-3;P02751-7	FN1	Fibronectin;Isoform 15 of Fibronectin;Isoform 3 of Fibronectin;Isoform 7 of Fibronectin	FINC_HUMAN	1	30.1556	1.30156	Dengue	QC	NaN	NaN	NaN	113.471	0.0750108
Dengue / QC	_YVTSAPMPEPQAPGR_	P01871	-0.678391	0.678391	1.02053e-09	3.75449e-09	176	P01871	IGHM	Immunoglobulin heavy constant mu	IGHM_HUMAN	1	-37.5138	0.624862	Dengue	QC	NaN	NaN	NaN	62.7747	0.0919949
Dengue / QC	_WTPPRAQITGYR_	P02751;P02751-15;P02751-3;P02751-7	1.55712	1.55712	1.03933e-09	3.81871e-09	42	P02751;P02751-15;P02751-3;P02751-7	FN1	Fibronectin;Isoform 15 of Fibronectin;Isoform 3 of Fibronectin;Isoform 7 of Fibronectin	FINC_HUMAN	1	194.266	2.94266	Dengue	QC	NaN	NaN	NaN	31.6777	0.22467
Dengue / QC	_C[Carbamidomethyl (C)]LAYDFYPGKIDVHWTR_	P25311	1.79562	1.79562	1.05693e-09	3.88086e-09	120	P25311	AZGP1	Zinc-alpha-2-glycoprotein	ZA2G_HUMAN	1	247.166	3.47166	Dengue	QC	NaN	NaN	NaN	78.2658	0.195211
Dengue / QC	_IALGGLLFPASNLRLPLVPALDGC[Carbamidomethyl (C)]LR_	I3L145;P04278	1.17849	1.17849	1.14937e-09	4.19858e-09	46	I3L145;P04278	SHBG	Sex hormone-binding globulin	I3L145_HUMAN;SHBG_HUMAN	1	126.34	2.2634	Dengue	QC	NaN	NaN	NaN	39.7198	0.175105
Dengue / QC	_QGENGQMMSC[Carbamidomethyl (C)]TC[Carbamidomethyl (C)]LGNGKGEFK_	P02751;P02751-15;P02751-3;P02751-7	1.24955	1.24955	1.16161e-09	4.23786e-09	42	P02751;P02751-15;P02751-3;P02751-7	FN1	Fibronectin;Isoform 15 of Fibronectin;Isoform 3 of Fibronectin;Isoform 7 of Fibronectin	FINC_HUMAN	1	137.767	2.37767	Dengue	QC	NaN	NaN	NaN	33.75	0.13925
Dengue / QC	_PRPGVTEATITGLEPGTEYTIYVIALK_	P02751;P02751-15;P02751-3;P02751-7	1.76596	1.76596	1.16113e-09	4.23786e-09	62	P02751;P02751-15;P02751-3;P02751-7	FN1	Fibronectin;Isoform 15 of Fibronectin;Isoform 3 of Fibronectin;Isoform 7 of Fibronectin	FINC_HUMAN	1	240.101	3.40101	Dengue	QC	NaN	NaN	NaN	32.6146	0.198417
Dengue / QC	_NQVVIAAGR_	P80108	0.569251	0.569251	1.19276e-09	4.34593e-09	148	P80108	GPLD1	Phosphatidylinositol-glycan-specific phospholipase D	PHLD_HUMAN	1	48.3753	1.48375	Dengue	QC	NaN	NaN	NaN	74.7671	0.072456
Dengue / QC	_VPGTSTSATLTGLTR_	P02751;P02751-15;P02751-3;P02751-7	0.585823	0.585823	1.20663e-09	4.39085e-09	104	P02751;P02751-15;P02751-3;P02751-7	FN1	Fibronectin;Isoform 15 of Fibronectin;Isoform 3 of Fibronectin;Isoform 7 of Fibronectin	FINC_HUMAN	1	50.0895	1.5009	Dengue	QC	NaN	NaN	NaN	70.8659	0.166738
Dengue / QC	_DVVLTTTFVDDIK_	P02748	0.532414	0.532414	1.23981e-09	4.50003e-09	150	P02748	C9	Complement component C9	CO9_HUMAN	1	44.6347	1.44635	Dengue	QC	NaN	NaN	NaN	115.286	0.0805307
Dengue / QC	_AFQPFFVELTMPYSVIRGEAFTLKATVLNYLPK_	P01023	1.42381	1.42381	1.32928e-09	4.80334e-09	56	P01023	A2M	Alpha-2-macroglobulin	A2MG_HUMAN	1	168.293	2.68293	Dengue	QC	NaN	NaN	NaN	40.0551	0.163171
Dengue / QC	_GISSTTVTGR_	P08519	1.83481	1.83481	1.34486e-09	4.85343e-09	80	P08519	LPA	Apolipoprotein(a)	APOA_HUMAN	1	256.724	3.56724	Dengue	QC	NaN	NaN	NaN	67.8546	0.250822
Dengue / QC	_ELNQAGQETLVTGWGYHSSR_	E7END6;P04070;P04070-2	0.37231	0.37231	1.37601e-09	4.95958e-09	132	E7END6;P04070;P04070-2	PROC	Vitamin K-dependent protein C;Vitamin K-dependent protein C;Isoform 2 of Vitamin K-dependent protein C	E7END6_HUMAN;PROC_HUMAN;PROC_HUMAN	1	29.4424	1.29442	Dengue	QC	NaN	NaN	NaN	102.155	0.0543562
Dengue / QC	_DLATVYVDVLKDSGRDYVSQFEGSALGK_	P02647	0.629322	0.629322	1.39983e-09	5.03585e-09	112	P02647	APOA1	Apolipoprotein A-I	APOA1_HUMAN	1	54.6838	1.54684	Dengue	QC	NaN	NaN	NaN	57.2807	0.0990246
Dengue / QC	_VAAEDWKKGDTFSC[Carbamidomethyl (C)]M[Oxidation (M)]VGHEALPLAFTQK_	A0A0G2JMB2	0.202197	0.202197	1.44902e-09	5.19636e-09	132	A0A0G2JMB2	IGHA2	Immunoglobulin heavy constant alpha 2 (Fragment)	A0A0G2JMB2_HUMAN	1	15.0449	1.15045	Dengue	QC	NaN	NaN	NaN	81.5452	0.359873
Dengue / QC	_GVTFLLR_	P04217	-0.496268	0.496268	1.50081e-09	5.37191e-09	172	P04217	A1BG	Alpha-1B-glycoprotein	A1BG_HUMAN	1	-29.1062	0.708938	Dengue	QC	NaN	NaN	NaN	76.3565	0.0715192
Dengue / QC	_AVDQSVLLMKPEAELSVSSVYNLLTVK_	P20742	0.715863	0.715863	1.51349e-09	5.4105e-09	88	P20742	PZP	Pregnancy zone protein	PZP_HUMAN	1	64.2466	1.64247	Dengue	QC	NaN	NaN	NaN	45.3735	0.208713
Dengue / QC	_LC[Carbamidomethyl (C)]FFPFVENGHSESSGQTHLEGDTVQIIC[Carbamidomethyl (C)]NTGYR_	Q03591	0.685323	0.685323	1.58012e-09	5.63096e-09	132	Q03591	CFHR1	Complement factor H-related protein 1	FHR1_HUMAN	1	60.8062	1.60806	Dengue	QC	NaN	NaN	NaN	98.6078	0.0893056
Dengue / QC	_TFVNITPAEVGVLVGK_	P07737	1.31087	1.31087	1.67278e-09	5.93515e-09	34	P07737	PFN1	Profilin-1	PROF1_HUMAN	1	148.09	2.4809	Dengue	QC	NaN	NaN	NaN	22.0794	0.136282
Dengue / QC	_C[Carbamidomethyl (C)]LPTAC[Carbamidomethyl (C)]TIQLR_	P04275	1.11402	1.11402	1.72273e-09	6.10856e-09	50	P04275	VWF	von Willebrand factor	VWF_HUMAN	1	116.448	2.16448	Dengue	QC	NaN	NaN	NaN	43.62	0.156458
Dengue / QC	_LKFIIPSPK_	P04114	0.410109	0.410109	1.80621e-09	6.38067e-09	70	P04114	APOB	Apolipoprotein B-100	APOB_HUMAN	1	32.8786	1.32879	Dengue	QC	NaN	NaN	NaN	61.2238	0.0907212
Dengue / QC	_VSNKALPAPIEK_	P01857	2.58982	2.58982	1.80522e-09	6.38067e-09	172	P01857	IGHG1	Immunoglobulin heavy constant gamma 1	IGHG1_HUMAN	1	502.022	6.02022	Dengue	QC	NaN	NaN	NaN	144.875	0.367454
Dengue / QC	_LPLVPALDGC[Carbamidomethyl (C)]LR_	I3L145;P04278	1.83272	1.83272	1.83157e-09	6.45822e-09	32	I3L145;P04278	SHBG	Sex hormone-binding globulin	I3L145_HUMAN;SHBG_HUMAN	1	256.208	3.56208	Dengue	QC	NaN	NaN	NaN	21.965	0.267361
Dengue / QC	_GLEWVANIK_	P01780	-0.813155	0.813155	1.89621e-09	6.67372e-09	164	P01780	IGHV3-7	Immunoglobulin heavy variable 3-7	HV307_HUMAN	1	-43.0864	0.569136	Dengue	QC	NaN	NaN	NaN	64.3562	0.113546
Dengue / QC	_QEALELMNQNLDIYEQQVMTAAQK_	P43251;P43251-2;P43251-3;P43251-4	1.02777	1.02777	1.89845e-09	6.67748e-09	36	P43251;P43251-2;P43251-3;P43251-4	BTD	Biotinidase;Isoform 2 of Biotinidase;Isoform 3 of Biotinidase;Isoform 4 of Biotinidase	BTD_HUMAN	1	103.887	2.03887	Dengue	QC	NaN	NaN	NaN	17.5346	0.111763
Dengue / QC	_LWAYLTIQQLLEQTVSASDADQQALR_	Q14624	1.05079	1.05079	1.90781e-09	6.70623e-09	68	Q14624	ITIH4	Inter-alpha-trypsin inhibitor heavy chain H4	ITIH4_HUMAN	1	107.166	2.07166	Dengue	QC	NaN	NaN	NaN	24.7208	0.123197
Dengue / QC	_LPQQANDYLNSFNWER_	P04114	0.944038	0.944038	1.91736e-09	6.73563e-09	34	P04114	APOB	Apolipoprotein B-100	APOB_HUMAN	1	92.3905	1.92391	Dengue	QC	NaN	NaN	NaN	25.6658	0.116202
Dengue / QC	_SGSSTASWIQNVDTK_	P04114	0.635041	0.635041	1.94148e-09	6.81616e-09	90	P04114	APOB	Apolipoprotein B-100	APOB_HUMAN	1	55.2982	1.55298	Dengue	QC	NaN	NaN	NaN	62.7163	0.0915196
Dengue / QC	_SC[Carbamidomethyl (C)]RPNDVTC[Carbamidomethyl (C)]VFDPVHTISHTVISLPTFR_	P23142	0.868495	0.868495	1.96597e-09	6.89363e-09	128	P23142	FBLN1	Fibulin-1	FBLN1_HUMAN	1	82.5757	1.82576	Dengue	QC	NaN	NaN	NaN	122.495	0.162134
Dengue / QC	_VLSIAQAHSPAFSC[Carbamidomethyl (C)]EQVR_	P08571	0.916685	0.916685	2.09699e-09	7.34397e-09	42	P08571	CD14	Monocyte differentiation antigen CD14	CD14_HUMAN	1	88.7773	1.88777	Dengue	QC	NaN	NaN	NaN	19.1829	0.0901388
Dengue / QC	_LLDSLPSDTRLVLLNAIYLSAK_	P05155;P05155-3	0.508662	0.508662	2.12375e-09	7.43311e-09	50	P05155;P05155-3	SERPING1	Plasma protease C1 inhibitor;Isoform 3 of Plasma protease C1 inhibitor	IC1_HUMAN	1	42.2731	1.42273	Dengue	QC	NaN	NaN	NaN	31.3578	0.183935
Dengue / QC	_FVTWIEGVMR_	P00747	0.250602	0.250602	2.12562e-09	7.43511e-09	128	P00747	PLG	Plasminogen	PLMN_HUMAN	1	18.9704	1.1897	Dengue	QC	NaN	NaN	NaN	88.0429	0.0931408
Dengue / QC	_ALRDFALQNPSAVPR_	P35858;P35858-2	0.417294	0.417294	2.16846e-09	7.58029e-09	114	P35858;P35858-2	IGFALS	Insulin-like growth factor-binding protein complex acid labile subunit;Isoform 2 of Insulin-like growth factor-binding protein complex acid labile subunit	ALS_HUMAN	1	33.5421	1.33542	Dengue	QC	NaN	NaN	NaN	103.76	0.0639242
Dengue / QC	_EEAPSLRPAPPPISGGGYR_	P02675	2.68243	2.68243	2.18826e-09	7.64009e-09	114	P02675	FGB	Fibrinogen beta chain	FIBB_HUMAN	1	541.935	6.41935	Dengue	QC	NaN	NaN	NaN	92.8184	0.357204
Dengue / QC	_ENTVTNDWIPEGEEDDDY[Sulfation (Y)]LDLEK_	P05546	1.34884	1.34884	2.39141e-09	8.30853e-09	44	P05546	SERPIND1	Heparin cofactor 2	HEP2_HUMAN	1	154.707	2.54707	Dengue	QC	NaN	NaN	NaN	31.0119	0.122364
Dengue / QC	_NIQEYLSILTDPDGKGKEK_	P04114	0.776169	0.776169	2.43729e-09	8.45245e-09	80	P04114	APOB	Apolipoprotein B-100	APOB_HUMAN	1	71.2577	1.71258	Dengue	QC	NaN	NaN	NaN	73.4837	0.11771
Dengue / QC	_WEDPGKQLYNVEATSYALLALLQLK_	P01024	0.668936	0.668936	2.44747e-09	8.48257e-09	38	P01024	C3	Complement C3	CO3_HUMAN	1	58.99	1.5899	Dengue	QC	NaN	NaN	NaN	25.0207	0.144806
Dengue / QC	_LEEAEKAADESER_	P67936	1.08049	1.08049	2.45713e-09	8.51086e-09	34	P67936	TPM4	Tropomyosin alpha-4 chain	TPM4_HUMAN	1	111.475	2.11475	Dengue	QC	NaN	NaN	NaN	26.1639	0.119939
Dengue / QC	_LDVDQALNR_	I3L145;P04278	1.30267	1.30267	2.47767e-09	8.56113e-09	36	I3L145;P04278	SHBG	Sex hormone-binding globulin	I3L145_HUMAN;SHBG_HUMAN	1	146.685	2.46685	Dengue	QC	NaN	NaN	NaN	26.6734	0.283399
Dengue / QC	_ESSSHHPGIAEFPSRGK_	P02671	2.53053	2.53053	2.49088e-09	8.60156e-09	36	P02671	FGA	Fibrinogen alpha chain	FIBA_HUMAN	1	477.784	5.77784	Dengue	QC	NaN	NaN	NaN	23.766	0.221991
Dengue / QC	_RLDYQEGPPGVEISC[Carbamidomethyl (C)]WSVEL_	Q14624	0.842235	0.842235	2.49828e-09	8.62186e-09	164	Q14624	ITIH4	Inter-alpha-trypsin inhibitor heavy chain H4	ITIH4_HUMAN	1	79.2825	1.79282	Dengue	QC	NaN	NaN	NaN	80.149	0.1132
Dengue / QC	_FFSAQTNR_	P29622	0.685122	0.685122	2.53103e-09	8.7243e-09	100	P29622	SERPINA4	Kallistatin	KAIN_HUMAN	1	60.7838	1.60784	Dengue	QC	NaN	NaN	NaN	48.1957	0.092515
Dengue / QC	_QKTGLDSPTGIDFSDITANSFTVHWIAPR_	P02751;P02751-15;P02751-3;P02751-7	0.784963	0.784963	2.60745e-09	8.96598e-09	92	P02751;P02751-15;P02751-3;P02751-7	FN1	Fibronectin;Isoform 15 of Fibronectin;Isoform 3 of Fibronectin;Isoform 7 of Fibronectin	FINC_HUMAN	1	72.3048	1.72305	Dengue	QC	NaN	NaN	NaN	58.4493	0.132871
Dengue / QC	_TVIGPDGHK_	P02671	1.52448	1.52448	2.61878e-09	8.99949e-09	74	P02671	FGA	Fibrinogen alpha chain	FIBA_HUMAN	1	187.683	2.87683	Dengue	QC	NaN	NaN	NaN	67.7251	0.24988
Dengue / QC	_IRITDNMFC[Carbamidomethyl (C)]AGYKPDEGK_	P00734	0.753197	0.753197	2.63863e-09	9.06223e-09	90	P00734	F2	Prothrombin	THRB_HUMAN	1	68.5524	1.68552	Dengue	QC	NaN	NaN	NaN	84.2243	0.1129
Dengue / QC	_EATEAAKC[Carbamidomethyl (C)]NLLAEK_	P02765	1.1652	1.1652	2.65394e-09	9.10931e-09	140	P02765	AHSG	Alpha-2-HS-glycoprotein	FETUA_HUMAN	1	124.264	2.24264	Dengue	QC	NaN	NaN	NaN	116.268	0.177005
Dengue / QC	_LATALQKLEEAEKAADESER_	P67936	1.24338	1.24338	2.7232e-09	9.33575e-09	28	P67936	TPM4	Tropomyosin alpha-4 chain	TPM4_HUMAN	1	136.752	2.36752	Dengue	QC	NaN	NaN	NaN	23.3059	0.150831
Dengue / QC	_LNTDIAGLASAIDMSTNYNSDSLHFSNVFR_	P04114	1.22969	1.22969	2.8908e-09	9.85089e-09	66	P04114	APOB	Apolipoprotein B-100	APOB_HUMAN	1	134.517	2.34517	Dengue	QC	NaN	NaN	NaN	21.1043	0.136793
Dengue / QC	_GLVWVSR_	A0A075B7E8	-0.578405	0.578405	2.91216e-09	9.91337e-09	176	A0A075B7E8	IGHV3OR16-13	Immunoglobulin heavy variable 3/OR16-13 (non-functional) (Fragment)	A0A075B7E8_HUMAN	1	-33.0296	0.669704	Dengue	QC	NaN	NaN	NaN	65.3763	0.0834438
Dengue / QC	_ESGMTMEELK_	P20851;P20851-2	1.07383	1.07383	2.97042e-09	1.0104e-08	28	P20851;P20851-2	C4BPB	C4b-binding protein beta chain;Isoform 2 of C4b-binding protein beta chain	C4BPB_HUMAN	1	110.502	2.10502	Dengue	QC	NaN	NaN	NaN	21.2085	0.11359
Dengue / QC	_KLWAYLTINQLLAER_	P19823	0.68268	0.68268	2.98172e-09	1.01364e-08	156	P19823	ITIH2	Inter-alpha-trypsin inhibitor heavy chain H2	ITIH2_HUMAN	1	60.5119	1.60512	Dengue	QC	NaN	NaN	NaN	111.595	0.109286
Dengue / QC	_DSLDQLVGGVPVTLNAQTIDVNQETSDLDPSK_	P01031	0.393066	0.393066	3.0209e-09	1.02604e-08	120	P01031	C5	Complement C5	CO5_HUMAN	1	31.3182	1.31318	Dengue	QC	NaN	NaN	NaN	85.2986	0.0909585
Dengue / QC	_TLVQEWTVQRPGQTC[Carbamidomethyl (C)]QPILEEQC[Carbamidomethyl (C)]LVPDSSHC[Carbamidomethyl (C)]QVLLLPLFAEC[Carbamidomethyl (C)]HK_	P04275	0.894615	0.894615	3.10019e-09	1.0514e-08	40	P04275	VWF	von Willebrand factor	VWF_HUMAN	1	85.9113	1.85911	Dengue	QC	NaN	NaN	NaN	31.324	0.145408
Dengue / QC	_TILDDLR_	P19823	0.939167	0.939167	3.11817e-09	1.05687e-08	46	P19823	ITIH2	Inter-alpha-trypsin inhibitor heavy chain H2	ITIH2_HUMAN	1	91.742	1.91742	Dengue	QC	NaN	NaN	NaN	39.0139	0.132803
Dengue / QC	_FKTGTTLKYTC[Carbamidomethyl (C)]LPGYVR_	P04003	1.14811	1.14811	3.12878e-09	1.05983e-08	148	P04003	C4BPA	C4b-binding protein alpha chain	C4BPA_HUMAN	1	121.624	2.21624	Dengue	QC	NaN	NaN	NaN	121.517	0.18853
Dengue / QC	_DNENVVNEYSSELEK_	P02675	2.00416	2.00416	3.15816e-09	1.06724e-08	126	P02675	FGB	Fibrinogen beta chain	FIBB_HUMAN	1	301.155	4.01155	Dengue	QC	NaN	NaN	NaN	105.515	0.329917
Dengue / QC	_YKPFSQVPTGEVFYYSC[Carbamidomethyl (C)]EYNFVSPSK_	Q03591	0.634428	0.634428	3.16472e-09	1.06882e-08	116	Q03591	CFHR1	Complement factor H-related protein 1	FHR1_HUMAN	1	55.2322	1.55232	Dengue	QC	NaN	NaN	NaN	90.8636	0.104559
Dengue / QC	_GVAGGSVAVLC[Carbamidomethyl (C)]PYNR_	P01833	1.6514	1.6514	3.17506e-09	1.07168e-08	74	P01833	PIGR	Polymeric immunoglobulin receptor	PIGR_HUMAN	1	214.138	3.14138	Dengue	QC	NaN	NaN	NaN	59.9561	0.250353
Dengue / QC	_NGPM[Oxidation (M)]GPPGM[Oxidation (M)]PGVPGPM[Oxidation (M)]GIPGEPGEEGR_	P02747	0.830031	0.830031	3.26088e-09	1.09934e-08	24	P02747	C1QC	Complement C1q subcomponent subunit C	C1QC_HUMAN	1	77.7723	1.77772	Dengue	QC	NaN	NaN	NaN	16.0505	0.113316
Dengue / QC	_VKENFDKAR_	P02753;Q5VY30	2.36251	2.36251	3.26856e-09	1.10127e-08	80	P02753;Q5VY30	RBP4	Retinol-binding protein 4;Retinol binding protein 4, plasma, isoform CRA_b	RET4_HUMAN;Q5VY30_HUMAN	1	414.265	5.14265	Dengue	QC	NaN	NaN	NaN	68.5626	0.313819
Dengue / QC	_ASSIIDELFQDRFFTR_	P10909;P10909-2;P10909-4;P10909-5	0.769869	0.769869	3.34537e-09	1.12582e-08	160	P10909;P10909-2;P10909-4;P10909-5	CLU	Clusterin;Isoform 2 of Clusterin;Isoform 4 of Clusterin;Isoform 5 of Clusterin	CLUS_HUMAN	1	70.5115	1.70512	Dengue	QC	NaN	NaN	NaN	87.55	0.128149
Dengue / QC	_LLNLDGTC[Carbamidomethyl (C)]ADSYSFVFSR_	P02753;Q5VY30	0.566379	0.566379	3.53295e-09	1.18474e-08	162	P02753;Q5VY30	RBP4	Retinol-binding protein 4;Retinol binding protein 4, plasma, isoform CRA_b	RET4_HUMAN;Q5VY30_HUMAN	1	48.0802	1.4808	Dengue	QC	NaN	NaN	NaN	116.011	0.0993575
Dengue / QC	_TIVTTLQDSIR_	P07996	0.46656	0.46656	3.83993e-09	1.2854e-08	92	P07996	THBS1	Thrombospondin-1	TSP1_HUMAN	1	38.1811	1.38181	Dengue	QC	NaN	NaN	NaN	83.277	0.0906168
Dengue / QC	_VMPIC[Carbamidomethyl (C)]LPSKNYAEVGR_	P00739	0.961262	0.961262	3.89607e-09	1.30266e-08	132	P00739	HPR	Haptoglobin-related protein	HPTR_HUMAN	1	94.7012	1.94701	Dengue	QC	NaN	NaN	NaN	113.946	0.141779
Dengue / QC	_GFQHLLHTLNLPGHGLETR_	P29622	0.614259	0.614259	3.90242e-09	1.30402e-08	124	P29622	SERPINA4	Kallistatin	KAIN_HUMAN	1	53.0771	1.53077	Dengue	QC	NaN	NaN	NaN	117.768	0.103638
Dengue / QC	_FC[Carbamidomethyl (C)]PFAER_	P78417;P78417-2;P78417-3;Q5TA01;Q5TA02	1.12434	1.12434	4.07436e-09	1.35908e-08	26	P78417;P78417-2;P78417-3;Q5TA01;Q5TA02	GSTO1	Glutathione S-transferase omega-1;Isoform 2 of Glutathione S-transferase omega-1;Isoform 3 of Glutathione S-transferase omega-1;Glutathione S-transferase omega-1 (Fragment);Glutathione S-transferase omega-1 (Fragment)	GSTO1_HUMAN;GSTO1_HUMAN;GSTO1_HUMAN;Q5TA01_HUMAN;Q5TA02_HUMAN	1	118.002	2.18002	Dengue	QC	NaN	NaN	NaN	17.6447	0.126037
Dengue / QC	_MLEEIMKYEASILTHDSSIR_	P02679	3.35222	3.35222	4.10904e-09	1.36904e-08	46	P02679	FGG	Fibrinogen gamma chain	FIBG_HUMAN	1	921.218	10.2122	Dengue	QC	NaN	NaN	NaN	30.1835	0.528818
Dengue / QC	_PGSAPTTVIYEDNQRPSGVPDR_	P01721	0.992997	0.992997	4.26289e-09	1.41757e-08	40	P01721	IGLV6-57	Immunoglobulin lambda variable 6-57	LV657_HUMAN	1	99.0315	1.99031	Dengue	QC	NaN	NaN	NaN	32.1079	0.141438
Dengue / QC	_EQQC[Carbamidomethyl (C)]VIM[Oxidation (M)]AENR_	P00747	0.519325	0.519325	4.26467e-09	1.41757e-08	112	P00747	PLG	Plasminogen	PLMN_HUMAN	1	43.3285	1.43328	Dengue	QC	NaN	NaN	NaN	106.131	0.0900569
Dengue / QC	_LTSLSDRYVSHFETEGPHVLLYFDSVPTSR_	P0C0L5	0.515176	0.515176	4.28e-09	1.42183e-08	160	P0C0L5	C4B	Complement C4-B	CO4B_HUMAN	1	42.9168	1.42917	Dengue	QC	NaN	NaN	NaN	125.594	0.0999764
Dengue / QC	_DGEKVSVLC[Carbamidomethyl (C)]QENYLIQEGEEITC[Carbamidomethyl (C)]KDGR_	P08603	1.15788	1.15788	4.29157e-09	1.42484e-08	110	P08603	CFH	Complement factor H	CFAH_HUMAN	1	123.129	2.23129	Dengue	QC	NaN	NaN	NaN	96.4652	0.134224
Dengue / QC	_ALEWLAR_	A0A0C4DH43	-0.645528	0.645528	4.30078e-09	1.4254e-08	168	A0A0C4DH43	IGHV2-70D	Immunoglobulin heavy variable 2-70D	HV70D_HUMAN	1	-36.0741	0.639259	Dengue	QC	NaN	NaN	NaN	74.2427	0.0985154
Dengue / QC	_NYAEAKDVFLGMFLYEYARR_	P02768	1.64585	1.64585	4.3004e-09	1.4254e-08	48	P02768	ALB	Serum albumin	ALBU_HUMAN	1	212.931	3.12931	Dengue	QC	NaN	NaN	NaN	32.8059	0.170736
Dengue / QC	_TDELPQLVTLPHPNLHGPEILDVPSTVQK_	P02751;P02751-15;P02751-3;P02751-7	0.866358	0.866358	4.32064e-09	1.43115e-08	48	P02751;P02751-15;P02751-3;P02751-7	FN1	Fibronectin;Isoform 15 of Fibronectin;Isoform 3 of Fibronectin;Isoform 7 of Fibronectin	FINC_HUMAN	1	82.3055	1.82306	Dengue	QC	NaN	NaN	NaN	38.8937	0.111899
Dengue / QC	_QAPGQELGWM[Oxidation (M)]GR_	A0A075B7D0	0.669418	0.669418	4.46676e-09	1.47611e-08	92	A0A075B7D0	IGHV1OR15-1	Immunoglobulin heavy variable 1/OR15-1 (non-functional) (Fragment)	A0A075B7D0_HUMAN	1	59.0432	1.59043	Dengue	QC	NaN	NaN	NaN	80.3106	0.102575
Dengue / QC	_NNEEYLALIFEK_	O00391	1.20097	1.20097	4.57214e-09	1.50743e-08	52	O00391	QSOX1	Sulfhydryl oxidase 1	QSOX1_HUMAN	1	129.894	2.29894	Dengue	QC	NaN	NaN	NaN	40.0229	0.135822
Dengue / QC	_AKVFKDVFLEMNIPYSVVR_	P01031	0.510779	0.510779	4.70974e-09	1.5492e-08	66	P01031	C5	Complement C5	CO5_HUMAN	1	42.4819	1.42482	Dengue	QC	NaN	NaN	NaN	53.1806	0.100651
Dengue / QC	_FQILTLWLPDSLTTWEIHGLSLSK_	P0C0L5	0.756069	0.756069	4.74611e-09	1.55936e-08	62	P0C0L5	C4B	Complement C4-B	CO4B_HUMAN	1	68.8883	1.68888	Dengue	QC	NaN	NaN	NaN	46.1873	0.135192
Dengue / QC	_LGGSAVISLEGKPL_	P23528	1.54128	1.54128	4.7684e-09	1.56397e-08	34	P23528	CFL1	Cofilin-1	COF1_HUMAN	1	191.053	2.91053	Dengue	QC	NaN	NaN	NaN	25.7377	0.216649
Dengue / QC	_MGPTELLIEMEDWK_	P02675	3.09566	3.09566	4.7659e-09	1.56397e-08	38	P02675	FGB	Fibrinogen beta chain	FIBB_HUMAN	1	754.843	8.54843	Dengue	QC	NaN	NaN	NaN	24.4688	0.321645
Dengue / QC	_LLSHC[Carbamidomethyl (C)]LLVTLAAHLPAEFTPAVHASLDKFLASVSTVLTSKYR_	P69905	3.03662	3.03662	5.13996e-09	1.67712e-08	38	P69905	HBA1	Hemoglobin subunit alpha	HBA_HUMAN	1	720.566	8.20566	Dengue	QC	NaN	NaN	NaN	19.6373	0.203584
Dengue / QC	_ASQGISNSLAWYQQKPGK_	A0A0G2JRQ6	2.21886	2.21886	5.14327e-09	1.67724e-08	36	A0A0G2JRQ6	NaN	Uncharacterized protein (Fragment)	A0A0G2JRQ6_HUMAN	1	365.526	4.65526	Dengue	QC	NaN	NaN	NaN	26.9137	0.308537
Dengue / QC	_VGVETTKPSK_	A0M8Q6	1.35708	1.35708	5.24013e-09	1.70687e-08	102	A0M8Q6	IGLC7	Immunoglobulin lambda constant 7	IGLC7_HUMAN	1	156.166	2.56166	Dengue	QC	NaN	NaN	NaN	58.9685	0.267722
Dengue / QC	_IIYKENERFQYK_	P08603	4.4342	4.4342	5.24957e-09	1.70897e-08	22	P08603	CFH	Complement factor H	CFAH_HUMAN	1	2061.86	21.6186	Dengue	QC	NaN	NaN	NaN	15.7541	0.252475
Dengue / QC	_YVGGQEHFAHLLILR_	P02763	-0.405929	0.405929	5.37204e-09	1.74384e-08	176	P02763	ORM1	Alpha-1-acid glycoprotein 1	A1AG1_HUMAN	1	-24.525	0.75475	Dengue	QC	NaN	NaN	NaN	115.391	0.0654734
Dengue / QC	_LLIYDASSR_	A0A0C4DH25	-1.21063	1.21063	5.43927e-09	1.76365e-08	176	A0A0C4DH25	IGKV3D-20	Immunoglobulin kappa variable 3D-20	KVD20_HUMAN	1	-56.7921	0.432079	Dengue	QC	NaN	NaN	NaN	58.4858	0.179244
Dengue / QC	_KGGETSEMYLIQPDSSVKPYR_	P02675	2.56337	2.56337	5.46845e-09	1.7721e-08	128	P02675	FGB	Fibrinogen beta chain	FIBB_HUMAN	1	491.089	5.91089	Dengue	QC	NaN	NaN	NaN	103.772	0.366135
Dengue / QC	_LSNLIKLAQKVPTADLEDVLPLAEDITNILSK_	P02774;P02774-3	2.70487	2.70487	5.48853e-09	1.77495e-08	38	P02774;P02774-3	GC	Vitamin D-binding protein;Isoform 3 of Vitamin D-binding protein	VTDB_HUMAN	1	552	6.52	Dengue	QC	NaN	NaN	NaN	31.1096	0.364782
Dengue / QC	_WSHPPSC[Carbamidomethyl (C)]IKTDC[Carbamidomethyl (C)]LSLPSFENAIPMGEK_	P08603	1.34357	1.34357	5.64733e-09	1.82073e-08	100	P08603	CFH	Complement factor H	CFAH_HUMAN	1	153.778	2.53778	Dengue	QC	NaN	NaN	NaN	86.8386	0.19119
Dengue / QC	_C[Carbamidomethyl (C)]VYLQTSMK_	P20742	3.69024	3.69024	5.66822e-09	1.82643e-08	42	P20742	PZP	Pregnancy zone protein	PZP_HUMAN	1	1190.84	12.9084	Dengue	QC	NaN	NaN	NaN	31.8343	0.512643
Dengue / QC	_TAMDVFVC[Carbamidomethyl (C)]TYFM[Oxidation (M)]PAAQLPELPDVELPTNK_	P02774;P02774-3	0.725269	0.725269	5.67946e-09	1.82901e-08	50	P02774;P02774-3	GC	Vitamin D-binding protein;Isoform 3 of Vitamin D-binding protein	VTDB_HUMAN	1	65.3208	1.65321	Dengue	QC	NaN	NaN	NaN	22.7728	0.24549
Dengue / QC	_FQVDNNNR_	P01023	-0.519102	0.519102	5.77041e-09	1.85515e-08	174	P01023	A2M	Alpha-2-macroglobulin	A2MG_HUMAN	1	-30.2194	0.697806	Dengue	QC	NaN	NaN	NaN	106.176	0.0856756
Dengue / QC	_RYKAAFTEC[Carbamidomethyl (C)]C[Carbamidomethyl (C)]QAADK_	P02768	3.31113	3.31113	5.78352e-09	1.85517e-08	56	P02768	ALB	Serum albumin	ALBU_HUMAN	1	892.546	9.92546	Dengue	QC	NaN	NaN	NaN	36.16	0.355259
Dengue / QC	_RLEVDIDIK_	P02671	3.21735	3.21735	5.90045e-09	1.89054e-08	74	P02671	FGA	Fibrinogen alpha chain	FIBA_HUMAN	1	830.077	9.30077	Dengue	QC	NaN	NaN	NaN	57.8849	0.448595
Dengue / QC	_LEPYADQLR_	P06727	0.603726	0.603726	5.95697e-09	1.90458e-08	102	P06727	APOA4	Apolipoprotein A-IV	APOA4_HUMAN	1	51.9636	1.51964	Dengue	QC	NaN	NaN	NaN	86.6346	0.103154
Dengue / QC	_ALRLPPTTTC[Carbamidomethyl (C)]QQQKEELLPAQDIK_	B4E1Z4	0.648235	0.648235	5.95766e-09	1.90458e-08	174	B4E1Z4	NaN	cDNA FLJ55673, highly similar to Complement factor B (EC 3.4.21.47)	B4E1Z4_HUMAN	1	56.7249	1.56725	Dengue	QC	NaN	NaN	NaN	140.964	0.10687
Dengue / QC	_RITEVWGIPSPIDTVFTR_	A0A0U1RR20;Q92954;Q92954-3;Q92954-6	0.799737	0.799737	5.96554e-09	1.90602e-08	128	A0A0U1RR20;Q92954;Q92954-3;Q92954-6	PRG4	Proteoglycan 4;Proteoglycan 4;Isoform C of Proteoglycan 4;Isoform F of Proteoglycan 4	A0A0U1RR20_HUMAN;PRG4_HUMAN;PRG4_HUMAN;PRG4_HUMAN	1	74.0783	1.74078	Dengue	QC	NaN	NaN	NaN	57.1984	0.116472
Dengue / QC	_VEPYGENFNK_	P06727	1.13083	1.13083	5.98341e-09	1.91066e-08	30	P06727	APOA4	Apolipoprotein A-IV	APOA4_HUMAN	1	118.985	2.18985	Dengue	QC	NaN	NaN	NaN	21.095	0.160077
Dengue / QC	_MELERPGGNEITR_	P02671	2.9965	2.9965	6.07161e-09	1.93447e-08	146	P02671	FGA	Fibrinogen alpha chain	FIBA_HUMAN	1	698.063	7.98063	Dengue	QC	NaN	NaN	NaN	119.961	0.396037
Dengue / QC	_DEPTYILNIKR_	P04114	1.85667	1.85667	6.07985e-09	1.93602e-08	20	P04114	APOB	Apolipoprotein B-100	APOB_HUMAN	1	262.17	3.6217	Dengue	QC	NaN	NaN	NaN	15.7273	0.162357
Dengue / QC	_GVSAYLSRPSPFDLFIR_	A0A286YES5;P01854	3.24721	3.24721	6.29448e-09	1.99876e-08	32	A0A286YES5;P01854	IGHE	Immunoglobulin heavy constant epsilon (Fragment);Immunoglobulin heavy constant epsilon	A0A286YES5_HUMAN;IGHE_HUMAN	1	849.531	9.49531	Dengue	QC	NaN	NaN	NaN	19.3964	0.339512
Dengue / QC	_SDVVYTDWK_	P02763	-0.50177	0.50177	6.30184e-09	1.99998e-08	176	P02763	ORM1	Alpha-1-acid glycoprotein 1	A1AG1_HUMAN	1	-29.376	0.70624	Dengue	QC	NaN	NaN	NaN	74.9565	0.0788912
Dengue / QC	_YDYC[Carbamidomethyl (C)]DILEC[Carbamidomethyl (C)]EEEC[Carbamidomethyl (C)]MHC[Carbamidomethyl (C)]SGENYDGKISK_	P00747	2.27641	2.27641	6.30974e-09	2.00137e-08	50	P00747	PLG	Plasminogen	PLMN_HUMAN	1	384.472	4.84472	Dengue	QC	NaN	NaN	NaN	41.8708	0.271384
Dengue / QC	_YSFTIELR_	A0A087WSY5;Q96IY4	0.619849	0.619849	6.33609e-09	2.00861e-08	132	A0A087WSY5;Q96IY4	CPB2	Carboxypeptidase B2	A0A087WSY5_HUMAN;CBPB2_HUMAN	1	53.6714	1.53671	Dengue	QC	NaN	NaN	NaN	54.9063	0.105141
Dengue / QC	_YRC[Carbamidomethyl (C)]HPGYKPTTDEPTTVIC[Carbamidomethyl (C)]QK_	P04003	2.156	2.156	6.36346e-09	2.01504e-08	84	P04003	C4BPA	C4b-binding protein alpha chain	C4BPA_HUMAN	1	345.677	4.45677	Dengue	QC	NaN	NaN	NaN	69.7897	0.298679
Dengue / QC	_AEDLVGKSLYVSATVILHSGSDMVQAER_	P01024	1.50775	1.50775	6.37507e-09	2.01759e-08	118	P01024	C3	Complement C3	CO3_HUMAN	1	184.367	2.84367	Dengue	QC	NaN	NaN	NaN	60.5847	0.18664
Dengue / QC	_KPVAFSDYIHPVC[Carbamidomethyl (C)]LPDRETAASLLQAGYK_	P00734	0.319404	0.319404	6.42908e-09	2.03242e-08	110	P00734	F2	Prothrombin	THRB_HUMAN	1	24.7815	1.24781	Dengue	QC	NaN	NaN	NaN	74.4242	0.0814172
Dengue / QC	_TLVLLMGK_	P07737	1.22006	1.22006	6.48278e-09	2.04712e-08	46	P07737	PFN1	Profilin-1	PROF1_HUMAN	1	132.957	2.32957	Dengue	QC	NaN	NaN	NaN	33.881	0.173951
Dengue / QC	_VSITSITVENVFVK_	P01031	1.03308	1.03308	6.51393e-09	2.05581e-08	66	P01031	C5	Complement C5	CO5_HUMAN	1	104.639	2.04639	Dengue	QC	NaN	NaN	NaN	47.3404	0.150914
Dengue / QC	_MGVSWIR_	A0A0B4J1V2	-0.639199	0.639199	7.16183e-09	2.25279e-08	160	A0A0B4J1V2	IGHV2-26	Immunoglobulin heavy variable 2-26	HV226_HUMAN	1	-35.7931	0.642069	Dengue	QC	NaN	NaN	NaN	85.542	0.0980737
Dengue / QC	_ELSYYSLEDLNNK_	P01031	0.271226	0.271226	7.24734e-09	2.2759e-08	106	P01031	C5	Complement C5	CO5_HUMAN	1	20.6833	1.20683	Dengue	QC	NaN	NaN	NaN	86.6617	0.0801565
Dengue / QC	_DSYYM[Oxidation (M)]TSSQLSTPLQQWR_	A0A0A0MS09;P01880;P01880-2	1.26975	1.26975	7.30421e-09	2.2925e-08	20	A0A0A0MS09;P01880;P01880-2	IGHD	Immunoglobulin heavy constant delta (Fragment);Immunoglobulin heavy constant delta;Isoform 2 of Immunoglobulin heavy constant delta	A0A0A0MS09_HUMAN;IGHD_HUMAN;IGHD_HUMAN	1	141.12	2.4112	Dengue	QC	NaN	NaN	NaN	9.86777	0.360459
Dengue / QC	_IGEHTPSALAIMENANVLAR_	P04075	1.76169	1.76169	7.82705e-09	2.44445e-08	36	P04075	ALDOA	Fructose-bisphosphate aldolase A	ALDOA_HUMAN	1	239.094	3.39094	Dengue	QC	NaN	NaN	NaN	21.1812	0.203159
Dengue / QC	_VGDTYERPKDSMIWDC[Carbamidomethyl (C)]TC[Carbamidomethyl (C)]IGAGR_	P02751;P02751-15;P02751-3;P02751-7	2.23489	2.23489	8.40969e-09	2.61063e-08	36	P02751;P02751-15;P02751-3;P02751-7	FN1	Fibronectin;Isoform 15 of Fibronectin;Isoform 3 of Fibronectin;Isoform 7 of Fibronectin	FINC_HUMAN	1	370.728	4.70728	Dengue	QC	NaN	NaN	NaN	29.6031	0.310244
Dengue / QC	_VGYVSGWGQSDNFKLTDHLK_	P00739	0.995506	0.995506	8.55078e-09	2.64576e-08	142	P00739	HPR	Haptoglobin-related protein	HPTR_HUMAN	1	99.378	1.99378	Dengue	QC	NaN	NaN	NaN	111.998	0.140428
Dengue / QC	_KLLETEC[Carbamidomethyl (C)]PQYIR_	P05109	1.11535	1.11535	8.61365e-09	2.66087e-08	32	P05109	S100A8	Protein S100-A8	S10A8_HUMAN	1	116.648	2.16648	Dengue	QC	NaN	NaN	NaN	24.1711	0.196098
Dengue / QC	_VFKDVFLEMNIPYSVVR_	P01031	0.540612	0.540612	8.62822e-09	2.66392e-08	100	P01031	C5	Complement C5	CO5_HUMAN	1	45.4589	1.45459	Dengue	QC	NaN	NaN	NaN	43.7026	0.0985915
Dengue / QC	_LGYVTADGETSGSITC[Carbamidomethyl (C)]GKDGWSAQPTC[Carbamidomethyl (C)]IK_	P08603	2.06492	2.06492	8.68317e-09	2.67943e-08	138	P08603	CFH	Complement factor H	CFAH_HUMAN	1	318.41	4.1841	Dengue	QC	NaN	NaN	NaN	109.462	0.320015
Dengue / QC	_GLEWLGR_	A0A0B4J1U7	-0.947169	0.947169	8.89279e-09	2.73452e-08	176	A0A0B4J1U7	IGHV6-1	Immunoglobulin heavy variable 6-1	HV601_HUMAN	1	-48.1351	0.518649	Dengue	QC	NaN	NaN	NaN	80.6005	0.150505
Dengue / QC	_ILLM[Oxidation (M)]DLNEEDPTVLELGITGSK_	P27169	-0.225534	0.225534	9.0933e-09	2.79084e-08	52	P27169	PON1	Serum paraoxonase/arylesterase 1	PON1_HUMAN	1	-14.4722	0.855278	Dengue	QC	NaN	NaN	NaN	32.8589	0.205797
Dengue / QC	_RHLVPGAPFLLQALVREMSGSPASGIPVK_	P0C0L5	0.799103	0.799103	9.55873e-09	2.92578e-08	86	P0C0L5	C4B	Complement C4-B	CO4B_HUMAN	1	74.0019	1.74002	Dengue	QC	NaN	NaN	NaN	52.048	0.153593
Dengue / QC	_SYSC[Carbamidomethyl (C)]QVM[Oxidation (M)]HEGSTVEK_	P15814	0.641057	0.641057	1.00632e-08	3.07027e-08	126	P15814	IGLL1	Immunoglobulin lambda-like polypeptide 1	IGLL1_HUMAN	1	55.9471	1.55947	Dengue	QC	NaN	NaN	NaN	67.0416	0.601113
Dengue / QC	_YSQKFQGR_	A0A0C4DH29	2.15002	2.15002	1.0389e-08	3.15612e-08	38	A0A0C4DH29	IGHV1-3	Immunoglobulin heavy variable 1-3	HV103_HUMAN	1	343.835	4.43835	Dengue	QC	NaN	NaN	NaN	22.3866	0.205833
Dengue / QC	_RPHETGGYMLEC[Carbamidomethyl (C)]VC[Carbamidomethyl (C)]LGNGK_	P02751;P02751-15;P02751-3;P02751-7	0.851316	0.851316	1.05269e-08	3.19289e-08	50	P02751;P02751-15;P02751-3;P02751-7	FN1	Fibronectin;Isoform 15 of Fibronectin;Isoform 3 of Fibronectin;Isoform 7 of Fibronectin	FINC_HUMAN	1	80.4147	1.80415	Dengue	QC	NaN	NaN	NaN	39.4921	0.132135
Dengue / QC	_VSNGAGTM[Oxidation (M)]SVSLVADENPFAQGALK_	P06396	0.95471	0.95471	1.05579e-08	3.20059e-08	16	P06396	GSN	Gelsolin	GELS_HUMAN	1	93.819	1.93819	Dengue	QC	NaN	NaN	NaN	8.22135	0.254979
Dengue / QC	_KPIWLSQMSC[Carbamidomethyl (C)]SGR_	O43866	-0.424269	0.424269	1.07792e-08	3.25847e-08	174	O43866	CD5L	CD5 antigen-like	CD5L_HUMAN	1	-25.4784	0.745216	Dengue	QC	NaN	NaN	NaN	95.64	0.0694073
Dengue / QC	_NTDNIIYPEEYSSC[Carbamidomethyl (C)]SR_	Q13201	0.652546	0.652546	1.07756e-08	3.25847e-08	24	Q13201	MMRN1	Multimerin-1	MMRN1_HUMAN	1	57.194	1.57194	Dengue	QC	NaN	NaN	NaN	9.37059	0.303019
Dengue / QC	_KGYTQQLAFR_	P01024	-0.492012	0.492012	1.08809e-08	3.28625e-08	174	P01024	C3	Complement C3	CO3_HUMAN	1	-28.8967	0.711033	Dengue	QC	NaN	NaN	NaN	94.0537	0.0806575
Dengue / QC	_DYFPEPVTVSWNSGALTSGVHTFPAVLQSSGLYSLSSVVTVPSSSLGTK_	P01861	0.83486	0.83486	1.09426e-08	3.30311e-08	172	P01861	IGHG4	Immunoglobulin heavy constant gamma 4	IGHG4_HUMAN	1	78.3684	1.78368	Dengue	QC	NaN	NaN	NaN	77.7822	0.129768
Dengue / QC	_HTLNQIDEVKVWPQQPSGELFEIEIDTLETTC[Carbamidomethyl (C)]HVLDPTPVAR_	P02765	0.658468	0.658468	1.09804e-08	3.31101e-08	164	P02765	AHSG	Alpha-2-HS-glycoprotein	FETUA_HUMAN	1	57.8406	1.57841	Dengue	QC	NaN	NaN	NaN	90.3604	0.0920877
Dengue / QC	_RPDFC[Carbamidomethyl (C)]PFQC[Carbamidomethyl (C)]PAHSHYELC[Carbamidomethyl (C)]GDSC[Carbamidomethyl (C)]PGSC[Carbamidomethyl (C)]PSLSAPEGC[Carbamidomethyl (C)]ESAC[Carbamidomethyl (C)]R_	Q9Y6R7	1.78071	1.78071	1.10145e-08	3.31955e-08	38	Q9Y6R7	FCGBP	IgGFc-binding protein	FCGBP_HUMAN	1	243.596	3.43596	Dengue	QC	NaN	NaN	NaN	29.6016	0.256035
Dengue / QC	_NGIDIYSLTVDSR_	Q14624	0.550142	0.550142	1.11021e-08	3.34238e-08	76	Q14624	ITIH4	Inter-alpha-trypsin inhibitor heavy chain H4	ITIH4_HUMAN	1	46.4229	1.46423	Dengue	QC	NaN	NaN	NaN	52.192	0.107754
Dengue / QC	_VGYVSGWGRNANFK_	P00738	0.83614	0.83614	1.11175e-08	3.34349e-08	46	P00738	HP	Haptoglobin	HPT_HUMAN	1	78.5267	1.78527	Dengue	QC	NaN	NaN	NaN	34.2379	0.131521
Dengue / QC	_GGETAQSADPQWEQLNNK_	P05546	0.56056	0.56056	1.1117e-08	3.34349e-08	100	P05546	SERPIND1	Heparin cofactor 2	HEP2_HUMAN	1	47.4842	1.47484	Dengue	QC	NaN	NaN	NaN	28.8867	0.0787816
Dengue / QC	_HTASAWLM[Oxidation (M)]SAPNSGPHNR_	Q96PD5	0.244664	0.244664	1.11356e-08	3.34717e-08	34	Q96PD5	PGLYRP2	N-acetylmuramoyl-L-alanine amidase	PGRP2_HUMAN	1	18.4817	1.18482	Dengue	QC	NaN	NaN	NaN	9.12893	0.35835
Dengue / QC	_TEDTALYYC[Carbamidomethyl (C)]AK_	A0A0B4J1X8	-0.496475	0.496475	1.11795e-08	3.35741e-08	174	A0A0B4J1X8	IGHV3-43	Immunoglobulin heavy variable 3-43	HV343_HUMAN	1	-29.1163	0.708837	Dengue	QC	NaN	NaN	NaN	90.2348	0.0924789
Dengue / QC	_HQSAC[Carbamidomethyl (C)]KDSDWPFC[Carbamidomethyl (C)]SDEDWNYKC[Carbamidomethyl (C)]PSGC[Carbamidomethyl (C)]R_	P02671	1.78874	1.78874	1.12123e-08	3.36487e-08	42	P02671	FGA	Fibrinogen alpha chain	FIBA_HUMAN	1	245.513	3.45513	Dengue	QC	NaN	NaN	NaN	36.6223	0.251397
Dengue / QC	_SIAAATSALVK_	Q9Y490	1.28498	1.28498	1.13848e-08	3.41125e-08	24	Q9Y490	TLN1	Talin-1	TLN1_HUMAN	1	143.679	2.43679	Dengue	QC	NaN	NaN	NaN	19.3998	0.157092
Dengue / QC	_QNC[Carbamidomethyl (C)]ELFEQLGEYKFQNALLVR_	P02768	0.721092	0.721092	1.14231e-08	3.42025e-08	176	P02768	ALB	Serum albumin	ALBU_HUMAN	1	64.8429	1.64843	Dengue	QC	NaN	NaN	NaN	117.388	0.111541
Dengue / QC	_DLYANTVLSGGTTMYPGIADR_	P60709	0.417002	0.417002	1.14269e-08	3.42025e-08	80	P60709	ACTB	Actin, cytoplasmic 1	ACTB_HUMAN	1	33.515	1.33515	Dengue	QC	NaN	NaN	NaN	67.7283	0.0908437
Dengue / QC	_AHVDALRTHLAPYSDELRQR_	P02647	1.24915	1.24915	1.15154e-08	3.44493e-08	44	P02647	APOA1	Apolipoprotein A-I	APOA1_HUMAN	1	137.701	2.37701	Dengue	QC	NaN	NaN	NaN	36.5657	0.132745
Dengue / QC	_AITPPHPASQANIIFDITEGNLRDSFDIIKR_	P23142	1.30716	1.30716	1.16371e-08	3.47768e-08	44	P23142	FBLN1	Fibulin-1	FBLN1_HUMAN	1	147.454	2.47454	Dengue	QC	NaN	NaN	NaN	36.5123	0.166921
Dengue / QC	_GGETSEMYLIQPDSSVKPYR_	P02675	2.24007	2.24007	1.16746e-08	3.48704e-08	136	P02675	FGB	Fibrinogen beta chain	FIBB_HUMAN	1	372.419	4.72419	Dengue	QC	NaN	NaN	NaN	113.891	0.340682
Dengue / QC	_DSMIWDC[Carbamidomethyl (C)]TC[Carbamidomethyl (C)]IGAGR_	P02751;P02751-15;P02751-3;P02751-7	0.734911	0.734911	1.18337e-08	3.53271e-08	148	P02751;P02751-15;P02751-3;P02751-7	FN1	Fibronectin;Isoform 15 of Fibronectin;Isoform 3 of Fibronectin;Isoform 7 of Fibronectin	FINC_HUMAN	1	66.4294	1.66429	Dengue	QC	NaN	NaN	NaN	133.54	0.11878
Dengue / QC	_SLFTDLVAEK_	P20742	3.35261	3.35261	1.23446e-08	3.67942e-08	40	P20742	PZP	Pregnancy zone protein	PZP_HUMAN	1	921.496	10.215	Dengue	QC	NaN	NaN	NaN	31.701	0.478939
Dengue / QC	_YTTFEYPNTISFSC[Carbamidomethyl (C)]NTGFYLNGADSAK_	P02749	0.876168	0.876168	1.23921e-08	3.69166e-08	150	P02749	APOH	Beta-2-glycoprotein 1	APOH_HUMAN	1	83.5493	1.83549	Dengue	QC	NaN	NaN	NaN	81.0305	0.130232
Dengue / QC	_RLTLQGIISWGSGC[Carbamidomethyl (C)]GDR_	P00748	1.32798	1.32798	1.24079e-08	3.69442e-08	104	P00748	F12	Coagulation factor XII	FA12_HUMAN	1	151.05	2.5105	Dengue	QC	NaN	NaN	NaN	77.2366	0.187037
Dengue / QC	_GFNC[Carbamidomethyl (C)]ESKPEAEETC[Carbamidomethyl (C)]FDK_	P02751;P02751-15;P02751-3;P02751-7	1.241	1.241	1.27146e-08	3.77783e-08	70	P02751;P02751-15;P02751-3;P02751-7	FN1	Fibronectin;Isoform 15 of Fibronectin;Isoform 3 of Fibronectin;Isoform 7 of Fibronectin	FINC_HUMAN	1	136.362	2.36362	Dengue	QC	NaN	NaN	NaN	46.219	0.139062
Dengue / QC	_TFPGFFSPM[Oxidation (M)]LGEFVSETESR_	P02671	2.48619	2.48619	1.28401e-08	3.81311e-08	138	P02671	FGA	Fibrinogen alpha chain	FIBA_HUMAN	1	460.297	5.60297	Dengue	QC	NaN	NaN	NaN	103.043	0.351196
Dengue / QC	_EFQLFSSPHGK_	P02787	-0.387201	0.387201	1.2911e-08	3.83219e-08	176	P02787	TF	Serotransferrin	TRFE_HUMAN	1	-23.5389	0.764611	Dengue	QC	NaN	NaN	NaN	99.6255	0.0665933
Dengue / QC	_GLEWMGR_	A0A0J9YXX1	0.485038	0.485038	1.3018e-08	3.85991e-08	164	A0A0J9YXX1	IGHV5-10-1	Immunoglobulin heavy variable 5-10-1	HV5X1_HUMAN	1	39.9623	1.39962	Dengue	QC	NaN	NaN	NaN	144.857	0.0865811
Dengue / QC	_C[Carbamidomethyl (C)]TSTGWIPAPR_	P08603	0.323698	0.323698	1.30138e-08	3.85991e-08	158	P08603	CFH	Complement factor H	CFAH_HUMAN	1	25.1535	1.25153	Dengue	QC	NaN	NaN	NaN	66.3481	0.0992526
Dengue / QC	_NNNEKDMALTAFVLISLQEAKDIC[Carbamidomethyl (C)]EEQVNSLPGSITK_	P01024	0.863311	0.863311	1.35551e-08	4.01287e-08	172	P01024	C3	Complement C3	CO3_HUMAN	1	81.9208	1.81921	Dengue	QC	NaN	NaN	NaN	86.3596	0.120335
Dengue / QC	_SSSYSKQFTSSTSYNRGDSTFESK_	P02671	1.37732	1.37732	1.37586e-08	4.07101e-08	106	P02671	FGA	Fibrinogen alpha chain	FIBA_HUMAN	1	159.785	2.59785	Dengue	QC	NaN	NaN	NaN	55.5286	0.314548
Dengue / QC	_E[Acetyl (Protein N-term)]VQLVESGGGLVQPGGSLR_	A0A0B4J2B5	0.248486	0.248486	1.43592e-08	4.23328e-08	112	A0A0B4J2B5	IGHV3OR16-9	Immunoglobulin heavy variable 3/OR16-9 (non-functional) (Fragment)	A0A0B4J2B5_HUMAN	1	18.7959	1.18796	Dengue	QC	NaN	NaN	NaN	48.0845	0.904674
Dengue / QC	_YVMLPVADQDQC[Carbamidomethyl (C)]IRHYEGSTVPEKK_	P00738	3.39494	3.39494	1.44144e-08	4.24735e-08	72	P00738	HP	Haptoglobin	HPT_HUMAN	1	951.909	10.5191	Dengue	QC	NaN	NaN	NaN	36.0843	0.434877
Dengue / QC	_TAFISDFAVTADGNAFIGDIKDKVTAWK_	P19827	0.664352	0.664352	1.44504e-08	4.25574e-08	88	P19827	ITIH1	Inter-alpha-trypsin inhibitor heavy chain H1	ITIH1_HUMAN	1	58.4857	1.58486	Dengue	QC	NaN	NaN	NaN	46.0072	0.0984507
Dengue / QC	_VLNYVDWIK_	B4DPQ0	0.582494	0.582494	1.4489e-08	4.26328e-08	78	B4DPQ0	C1R	Complement C1r subcomponent	B4DPQ0_HUMAN	1	49.7435	1.49744	Dengue	QC	NaN	NaN	NaN	58.74	0.0984224
Dengue / QC	_WYQMGIVSWGEGC[Carbamidomethyl (C)]DR_	P00734	0.699283	0.699283	1.45892e-08	4.28996e-08	116	P00734	F2	Prothrombin	THRB_HUMAN	1	62.3698	1.6237	Dengue	QC	NaN	NaN	NaN	45.5363	0.101341
Dengue / QC	_TVLSPVEPSC[Carbamidomethyl (C)]EGMQC[Carbamidomethyl (C)]AAGQR_	Q9Y6R7	1.54435	1.54435	1.46323e-08	4.30041e-08	42	Q9Y6R7	FCGBP	IgGFc-binding protein	FCGBP_HUMAN	1	191.672	2.91672	Dengue	QC	NaN	NaN	NaN	36.8394	0.241669
Dengue / QC	_VVTPLSPPTNLHLEANPDTGVLTVSWER_	P02751;P02751-15;P02751-3;P02751-7	0.903092	0.903092	1.46929e-08	4.31377e-08	116	P02751;P02751-15;P02751-3;P02751-7	FN1	Fibronectin;Isoform 15 of Fibronectin;Isoform 3 of Fibronectin;Isoform 7 of Fibronectin	FINC_HUMAN	1	87.0069	1.87007	Dengue	QC	NaN	NaN	NaN	54.3436	0.122675
Dengue / QC	_SITLFVQEDR_	P07996	0.554586	0.554586	1.48957e-08	4.36204e-08	92	P07996	THBS1	Thrombospondin-1	TSP1_HUMAN	1	46.8747	1.46875	Dengue	QC	NaN	NaN	NaN	81.3465	0.0859919
Dengue / QC	_IEGSNKVPVDPATYGQFYGGDSYIILYNYR_	P06396	0.7017	0.7017	1.54266e-08	4.49898e-08	150	P06396	GSN	Gelsolin	GELS_HUMAN	1	62.6421	1.62642	Dengue	QC	NaN	NaN	NaN	66.0697	0.0998023
Dengue / QC	_PLLEKSHC[Carbamidomethyl (C)]IAEVENDEMPADLPSLAADFVESK_	P02768	0.474037	0.474037	1.5605e-08	4.54167e-08	90	P02768	ALB	Serum albumin	ALBU_HUMAN	1	38.8991	1.38899	Dengue	QC	NaN	NaN	NaN	41.446	0.325849
Dengue / QC	_MHSM[Oxidation (M)]NGFMYGNQPGLTMC[Carbamidomethyl (C)]K_	P00450	0.351678	0.351678	1.56199e-08	4.54369e-08	28	P00450	CP	Ceruloplasmin	CERU_HUMAN	1	27.6044	1.27604	Dengue	QC	NaN	NaN	NaN	21.7058	0.118472
Dengue / QC	_NLNEKDYELLC[Carbamidomethyl (C)]LDGTRK_	P02787	1.5113	1.5113	1.61497e-08	4.69299e-08	90	P02787	TF	Serotransferrin	TRFE_HUMAN	1	185.067	2.85067	Dengue	QC	NaN	NaN	NaN	48.4255	0.20918
Dengue / QC	_EDFTSLSLVLYSR_	P02774;P02774-3	0.68357	0.68357	1.64049e-08	4.75258e-08	136	P02774;P02774-3	GC	Vitamin D-binding protein;Isoform 3 of Vitamin D-binding protein	VTDB_HUMAN	1	60.6109	1.60611	Dengue	QC	NaN	NaN	NaN	102.971	0.122545
Dengue / QC	_EVGPPLPQEAVPLQK_	Q16610	1.18377	1.18377	1.66549e-08	4.81763e-08	60	Q16610	ECM1	Extracellular matrix protein 1	ECM1_HUMAN	1	127.17	2.2717	Dengue	QC	NaN	NaN	NaN	22.3248	0.157827
Dengue / QC	_NIEKISMLEK_	P00734	1.69818	1.69818	1.67905e-08	4.84944e-08	40	P00734	F2	Prothrombin	THRB_HUMAN	1	224.492	3.24492	Dengue	QC	NaN	NaN	NaN	30.2238	0.230746
Dengue / QC	_QVFLYPEK_	P04114	0.845577	0.845577	1.67904e-08	4.84944e-08	38	P04114	APOB	Apolipoprotein B-100	APOB_HUMAN	1	79.6984	1.79698	Dengue	QC	NaN	NaN	NaN	31.7271	0.133244
Dengue / QC	_SC[Carbamidomethyl (C)]HLAMAPNHAVVSR_	E7ER44;P02788	2.08792	2.08792	1.68202e-08	4.85311e-08	24	E7ER44;P02788	LTF	Lactotransferrin	E7ER44_HUMAN;TRFL_HUMAN	1	325.136	4.25136	Dengue	QC	NaN	NaN	NaN	17.4915	0.258031
Dengue / QC	_DKVTAWK_	P19827	0.885673	0.885673	1.69218e-08	4.87993e-08	48	P19827	ITIH1	Inter-alpha-trypsin inhibitor heavy chain H1	ITIH1_HUMAN	1	84.7626	1.84763	Dengue	QC	NaN	NaN	NaN	42.6251	0.135718
Dengue / QC	_TYTC[Carbamidomethyl (C)]NVDHKPSNTKVDK_	P01861	1.19858	1.19858	1.73881e-08	5.00678e-08	146	P01861	IGHG4	Immunoglobulin heavy constant gamma 4	IGHG4_HUMAN	1	129.514	2.29514	Dengue	QC	NaN	NaN	NaN	134.152	0.16473
Dengue / QC	_APDVFPIISGC[Carbamidomethyl (C)]R_	A0A0A0MS09;P01880;P01880-2	0.970888	0.970888	1.74712e-08	5.02308e-08	50	A0A0A0MS09;P01880;P01880-2	IGHD	Immunoglobulin heavy constant delta (Fragment);Immunoglobulin heavy constant delta;Isoform 2 of Immunoglobulin heavy constant delta	A0A0A0MS09_HUMAN;IGHD_HUMAN;IGHD_HUMAN	1	96.0046	1.96005	Dengue	QC	NaN	NaN	NaN	44.0708	0.176055
Dengue / QC	_LFLEPTQADIALLK_	P08519	1.04615	1.04615	1.7702e-08	5.08279e-08	104	P08519	LPA	Apolipoprotein(a)	APOA_HUMAN	1	106.501	2.06501	Dengue	QC	NaN	NaN	NaN	71.942	0.121198
Dengue / QC	_TQVNTQAEQLR_	P06727	1.17034	1.17034	1.80455e-08	5.16469e-08	64	P06727	APOA4	Apolipoprotein A-IV	APOA4_HUMAN	1	125.065	2.25065	Dengue	QC	NaN	NaN	NaN	41.3292	0.184686
Dengue / QC	_VTSTLTIK_	P01871	-0.545493	0.545493	1.81401e-08	5.18652e-08	176	P01871	IGHM	Immunoglobulin heavy constant mu	IGHM_HUMAN	1	-31.4843	0.685157	Dengue	QC	NaN	NaN	NaN	76.2964	0.0896559
Dengue / QC	_IDSLLENDR_	P10909;P10909-2;P10909-4;P10909-5	0.559643	0.559643	1.82352e-08	5.21109e-08	70	P10909;P10909-2;P10909-4;P10909-5	CLU	Clusterin;Isoform 2 of Clusterin;Isoform 4 of Clusterin;Isoform 5 of Clusterin	CLUS_HUMAN	1	47.3905	1.4739	Dengue	QC	NaN	NaN	NaN	43.6804	0.0762283
Dengue / QC	_SIAQYWLGC[Carbamidomethyl (C)]PAPGHL_	P04004	0.599806	0.599806	1.82883e-08	5.22366e-08	174	P04004	VTN	Vitronectin	VTNC_HUMAN	1	51.5513	1.51551	Dengue	QC	NaN	NaN	NaN	110.7	0.092367
Dengue / QC	_FSC[Carbamidomethyl (C)]MC[Carbamidomethyl (C)]PQGYQVVR_	Q12805;Q12805-2;Q12805-4	1.14415	1.14415	1.83059e-08	5.22435e-08	82	Q12805;Q12805-2;Q12805-4	EFEMP1	EGF-containing fibulin-like extracellular matrix protein 1;Isoform 2 of EGF-containing fibulin-like extracellular matrix protein 1;Isoform 4 of EGF-containing fibulin-like extracellular matrix protein 1	FBLN3_HUMAN	1	121.016	2.21016	Dengue	QC	NaN	NaN	NaN	58.1139	0.172722
Dengue / QC	_LTLQGIISWGSGC[Carbamidomethyl (C)]GDR_	P00748	1.13268	1.13268	1.83091e-08	5.22435e-08	46	P00748	F12	Coagulation factor XII	FA12_HUMAN	1	119.266	2.19266	Dengue	QC	NaN	NaN	NaN	33.5087	0.158438
Dengue / QC	_LIQGAPTIR_	P18065	1.21561	1.21561	1.88399e-08	5.35698e-08	52	P18065	IGFBP2	Insulin-like growth factor-binding protein 2	IBP2_HUMAN	1	132.239	2.32239	Dengue	QC	NaN	NaN	NaN	41.9757	0.205729
Dengue / QC	_DSFHLDEQFTVPVEM[Oxidation (M)]MQAR_	P08697	0.649843	0.649843	1.89387e-08	5.38236e-08	88	P08697	SERPINF2	Alpha-2-antiplasmin	A2AP_HUMAN	1	56.8998	1.569	Dengue	QC	NaN	NaN	NaN	78.1862	0.0947393
Dengue / QC	_LTGSC[Carbamidomethyl (C)]SYVLFQNK_	P04275	0.861867	0.861867	1.93851e-08	5.50649e-08	56	P04275	VWF	von Willebrand factor	VWF_HUMAN	1	81.7388	1.81739	Dengue	QC	NaN	NaN	NaN	45.9731	0.172107
Dengue / QC	_TFGSGEADC[Carbamidomethyl (C)]GLRPLFEKK_	P00734	0.903078	0.903078	1.97051e-08	5.59181e-08	158	P00734	F2	Prothrombin	THRB_HUMAN	1	87.0052	1.87005	Dengue	QC	NaN	NaN	NaN	149.853	0.12856
Dengue / QC	_NSLFEYQK_	P02671	1.59257	1.59257	2.03176e-08	5.75698e-08	114	P02671	FGA	Fibrinogen alpha chain	FIBA_HUMAN	1	201.587	3.01587	Dengue	QC	NaN	NaN	NaN	92.2443	0.218651
Dengue / QC	_GGGAGFISGLSYLELDNPAGNK_	P10643	0.922164	0.922164	2.08609e-08	5.89331e-08	84	P10643	C7	Complement component C7	CO7_HUMAN	1	89.4956	1.89496	Dengue	QC	NaN	NaN	NaN	64.3229	0.160447
Dengue / QC	_GHMLENHVERLWAYLTIQELLAKR_	P19827	0.794335	0.794335	2.09596e-08	5.91824e-08	158	P19827	ITIH1	Inter-alpha-trypsin inhibitor heavy chain H1	ITIH1_HUMAN	1	73.4278	1.73428	Dengue	QC	NaN	NaN	NaN	110.795	0.106021
Dengue / QC	_LYPTYSTK_	P80108	0.608731	0.608731	2.097e-08	5.91825e-08	84	P80108	GPLD1	Phosphatidylinositol-glycan-specific phospholipase D	PHLD_HUMAN	1	52.4918	1.52492	Dengue	QC	NaN	NaN	NaN	43.3384	0.0775069
Dengue / QC	_YVTC[Carbamidomethyl (C)]SNGDWSEPPR_	Q92496;Q92496-2	0.750446	0.750446	2.10657e-08	5.94231e-08	36	Q92496;Q92496-2	CFHR4	Complement factor H-related protein 4;Isoform 2 of Complement factor H-related protein 4	FHR4_HUMAN	1	68.2312	1.68231	Dengue	QC	NaN	NaN	NaN	18.8414	0.142904
Dengue / QC	_SQDILLSVENTVIYR_	P07225	0.875377	0.875377	2.1185e-08	5.973e-08	104	P07225	PROS1	Vitamin K-dependent protein S	PROS_HUMAN	1	83.4488	1.83449	Dengue	QC	NaN	NaN	NaN	51.9676	0.12545
Dengue / QC	_ILDDLSPR_	Q14624	-0.560536	0.560536	2.14321e-08	6.03856e-08	176	Q14624	ITIH4	Inter-alpha-trypsin inhibitor heavy chain H4	ITIH4_HUMAN	1	-32.195	0.67805	Dengue	QC	NaN	NaN	NaN	53.8154	0.0897074
Dengue / QC	_RGYQLSDVDGVTC[Carbamidomethyl (C)]EDIDEC[Carbamidomethyl (C)]ALPTGGHIC[Carbamidomethyl (C)]SYR_	P23142	1.21004	1.21004	2.1472e-08	6.04192e-08	142	P23142	FBLN1	Fibulin-1	FBLN1_HUMAN	1	131.344	2.31344	Dengue	QC	NaN	NaN	NaN	107.538	0.220799
Dengue / QC	_EC[Carbamidomethyl (C)]ELPKIDVHLVPDRK_	P08603	1.90524	1.90524	2.19343e-08	6.15372e-08	20	P08603	CFH	Complement factor H	CFAH_HUMAN	1	274.57	3.7457	Dengue	QC	NaN	NaN	NaN	11.5122	0.190043
Dengue / QC	_LFGEVTSPLFPKPYPNNFETTTVITVPTGYR_	B4DPQ0	0.649366	0.649366	2.37476e-08	6.62323e-08	112	B4DPQ0	C1R	Complement C1r subcomponent	B4DPQ0_HUMAN	1	56.8479	1.56848	Dengue	QC	NaN	NaN	NaN	88.4984	0.102554
Dengue / QC	_SDVMYTDWK_	P19652	-0.400602	0.400602	2.41045e-08	6.70633e-08	176	P19652	ORM2	Alpha-1-acid glycoprotein 2	A1AG2_HUMAN	1	-24.2458	0.757542	Dengue	QC	NaN	NaN	NaN	85.3932	0.0625315
Dengue / QC	_ASPAFLASQNTKGEESYC[Carbamidomethyl (C)]IC[Carbamidomethyl (C)]GNER_	P20742	3.65675	3.65675	2.44785e-08	6.79707e-08	34	P20742	PZP	Pregnancy zone protein	PZP_HUMAN	1	1161.22	12.6122	Dengue	QC	NaN	NaN	NaN	27.9997	0.473975
Dengue / QC	_TRRVDTVDPPYPR_	P04004	1.31664	1.31664	2.49018e-08	6.90784e-08	164	P04004	VTN	Vitronectin	VTNC_HUMAN	1	149.085	2.49085	Dengue	QC	NaN	NaN	NaN	147.919	0.197437
Dengue / QC	_GLMAALC[Carbamidomethyl (C)]PHKFPAIQNLALR_	P08571	0.694284	0.694284	2.55535e-08	7.08173e-08	102	P08571	CD14	Monocyte differentiation antigen CD14	CD14_HUMAN	1	61.8081	1.61808	Dengue	QC	NaN	NaN	NaN	36.4984	0.0927454
Dengue / QC	_DNAKNSLYLQM[Oxidation (M)]NSLRAEDTAVYYC[Carbamidomethyl (C)]AR_	P01762	1.4607	1.4607	2.58908e-08	7.16472e-08	108	P01762	IGHV3-11	Immunoglobulin heavy variable 3-11	HV311_HUMAN	1	175.242	2.75242	Dengue	QC	NaN	NaN	NaN	49.6552	0.780363
Dengue / QC	_TNPC[Carbamidomethyl (C)]LHGGR_	P00748	1.57924	1.57924	2.68077e-08	7.39425e-08	96	P00748	F12	Coagulation factor XII	FA12_HUMAN	1	198.812	2.98812	Dengue	QC	NaN	NaN	NaN	87.9344	0.228721
Dengue / QC	_C[Carbamidomethyl (C)]QIAGWGHLDENVSGYSSSLR_	Q04756	0.563538	0.563538	2.68113e-08	7.39425e-08	96	Q04756	HGFAC	Hepatocyte growth factor activator	HGFA_HUMAN	1	47.7889	1.47789	Dengue	QC	NaN	NaN	NaN	65.7568	0.0742529
Dengue / QC	_FTEDAKR_	P01011	1.10002	1.10002	2.69051e-08	7.41291e-08	68	P01011	SERPINA3	Alpha-1-antichymotrypsin	AACT_HUMAN	1	114.358	2.14358	Dengue	QC	NaN	NaN	NaN	47.7125	0.174877
Dengue / QC	_HNEVWHLVGITSWGEGC[Carbamidomethyl (C)]AQR_	P03951	1.50203	1.50203	2.68965e-08	7.41291e-08	24	P03951	F11	Coagulation factor XI	FA11_HUMAN	1	183.24	2.8324	Dengue	QC	NaN	NaN	NaN	14.5119	0.205434
Dengue / QC	_STAAM[Oxidation (M)]STYTGIFTDQVLSVLKGEE_	A0A024R0T9;K7ER74;P02655	0.488058	0.488058	2.73648e-08	7.53229e-08	26	A0A024R0T9;K7ER74;P02655	APOC4-APOC2;APOC4-APOC2;APOC2	Apolipoprotein C-II isoform 1;APOC4-APOC2 readthrough (NMD candidate);Apolipoprotein C-II	A0A024R0T9_HUMAN;K7ER74_HUMAN;APOC2_HUMAN	1	40.2556	1.40256	Dengue	QC	NaN	NaN	NaN	9.44508	0.412989
Dengue / QC	_FRVVSVDENFRPR_	P20742	1.95452	1.95452	2.82933e-08	7.76155e-08	96	P20742	PZP	Pregnancy zone protein	PZP_HUMAN	1	287.586	3.87586	Dengue	QC	NaN	NaN	NaN	72.1013	0.31869
Dengue / QC	_AVNRADTAKEVSFDVELPK_	Q06033;Q06033-2	1.11684	1.11684	2.90225e-08	7.94242e-08	108	Q06033;Q06033-2	ITIH3	Inter-alpha-trypsin inhibitor heavy chain H3;Isoform 2 of Inter-alpha-trypsin inhibitor heavy chain H3	ITIH3_HUMAN	1	116.871	2.16871	Dengue	QC	NaN	NaN	NaN	87.8137	0.166721
Dengue / QC	_ESNEELTESC[Carbamidomethyl (C)]ETK_	P01042	1.83814	1.83814	2.91865e-08	7.97281e-08	154	P01042	KNG1	Kininogen-1	KNG1_HUMAN	1	257.548	3.57548	Dengue	QC	NaN	NaN	NaN	97.1281	0.140984
Dengue / QC	_AHYGGFTVQNEANKYQISVNK_	P02675	2.35108	2.35108	2.94777e-08	8.02833e-08	130	P02675	FGB	Fibrinogen beta chain	FIBB_HUMAN	1	410.206	5.10206	Dengue	QC	NaN	NaN	NaN	111.842	0.330258
Dengue / QC	_GHFSISIPVKSDIAPVARLLIYAVLPTGDVIGDSAK_	P01023	2.58004	2.58004	2.95715e-08	8.05001e-08	66	P01023	A2M	Alpha-2-macroglobulin	A2MG_HUMAN	1	497.956	5.97956	Dengue	QC	NaN	NaN	NaN	38.4781	0.255312
Dengue / QC	_NPDGDVGGPWC[Carbamidomethyl (C)]YTTNPRK_	P00747	1.70981	1.70981	2.98265e-08	8.10779e-08	44	P00747	PLG	Plasminogen	PLMN_HUMAN	1	227.117	3.27117	Dengue	QC	NaN	NaN	NaN	34.0699	0.196545
Dengue / QC	_QAKEPC[Carbamidomethyl (C)]VESLVSQYFQTVTDYGK_	P02652;V9GYM3	1.00863	1.00863	2.98578e-08	8.11242e-08	52	P02652;V9GYM3	APOA2	Apolipoprotein A-II	APOA2_HUMAN;V9GYM3_HUMAN	1	101.2	2.012	Dengue	QC	NaN	NaN	NaN	19.0689	0.332805
Dengue / QC	_VGFAEAARL_	A0A1B0GV23;A0A1B0GVD5;A0A1B0GWE8;P07339	1.0515	1.0515	2.99711e-08	8.1393e-08	50	A0A1B0GV23;A0A1B0GVD5;A0A1B0GWE8;P07339	CTSD	Cathepsin D	A0A1B0GV23_HUMAN;A0A1B0GVD5_HUMAN;A0A1B0GWE8_HUMAN;CATD_HUMAN	1	107.268	2.07268	Dengue	QC	NaN	NaN	NaN	39.809	0.169285
Dengue / QC	_GYTQQLAFR_	P01024	-0.438801	0.438801	3.0575e-08	8.27957e-08	176	P01024	C3	Complement C3	CO3_HUMAN	1	-26.2253	0.737747	Dengue	QC	NaN	NaN	NaN	102.442	0.0726098
Dengue / QC	_RMPC[Carbamidomethyl (C)]AEDYLSVVLNQLC[Carbamidomethyl (C)]VLHEKTPVSDR_	P02768	0.785266	0.785266	3.33067e-08	8.9638e-08	176	P02768	ALB	Serum albumin	ALBU_HUMAN	1	72.341	1.72341	Dengue	QC	NaN	NaN	NaN	158.013	0.13954
Dengue / QC	_RLPFIC[Carbamidomethyl (C)]SY_	P13727	2.69671	2.69671	3.34211e-08	8.99031e-08	36	P13727	PRG2	Bone marrow proteoglycan	PRG2_HUMAN	1	548.322	6.48322	Dengue	QC	NaN	NaN	NaN	21.5738	0.353146
Dengue / QC	_LMALREPAAQAPVK_	A0A0A0MS09;P01880;P01880-2	1.65333	1.65333	3.38924e-08	9.09128e-08	20	A0A0A0MS09;P01880;P01880-2	IGHD	Immunoglobulin heavy constant delta (Fragment);Immunoglobulin heavy constant delta;Isoform 2 of Immunoglobulin heavy constant delta	A0A0A0MS09_HUMAN;IGHD_HUMAN;IGHD_HUMAN	1	214.558	3.14558	Dengue	QC	NaN	NaN	NaN	15.5587	0.170306
Dengue / QC	_FSAEFDFR_	P07225	0.430602	0.430602	3.57044e-08	9.55928e-08	130	P07225	PROS1	Vitamin K-dependent protein S	PROS_HUMAN	1	34.7796	1.3478	Dengue	QC	NaN	NaN	NaN	79.2668	0.0719391
Dengue / QC	_SFYFPMSIDKK_	P05160	0.460973	0.460973	3.6256e-08	9.68873e-08	52	P05160	F13B	Coagulation factor XIII B chain	F13B_HUMAN	1	37.647	1.37647	Dengue	QC	NaN	NaN	NaN	24.9146	0.269572
Dengue / QC	_QAAGSGHLLALGTPENPSWLSLHLQDQK_	I3L145;P04278	0.7512	0.7512	3.67727e-08	9.80975e-08	62	I3L145;P04278	SHBG	Sex hormone-binding globulin	I3L145_HUMAN;SHBG_HUMAN	1	68.3193	1.68319	Dengue	QC	NaN	NaN	NaN	42.0121	0.165844
Dengue / QC	_YAATSQVLLPSK_	P01871	-0.521986	0.521986	3.70023e-08	9.86496e-08	170	P01871	IGHM	Immunoglobulin heavy constant mu	IGHM_HUMAN	1	-30.3588	0.696412	Dengue	QC	NaN	NaN	NaN	136.471	0.0879869
Dengue / QC	_HPYTGPSC[Carbamidomethyl (C)]SQVVPVC[Carbamidomethyl (C)]RPNPC[Carbamidomethyl (C)]QNGATC[Carbamidomethyl (C)]SR_	Q14520;Q14520-2	1.12368	1.12368	3.73084e-08	9.94191e-08	26	Q14520;Q14520-2	HABP2	Hyaluronan-binding protein 2;Isoform 2 of Hyaluronan-binding protein 2	HABP2_HUMAN	1	117.901	2.17901	Dengue	QC	NaN	NaN	NaN	20.3838	0.14046
Dengue / QC	_QLNYKHYDGSYSTFGER_	P01023	2.22402	2.22402	4.11321e-08	1.08894e-07	104	P01023	A2M	Alpha-2-macroglobulin	A2MG_HUMAN	1	367.194	4.67194	Dengue	QC	NaN	NaN	NaN	80.2524	0.324899
Dengue / QC	_TLSPVLESPR_	A0A087X0I0;A0A140T8Y3;A0A140T8Z8;A0A140T9C0;A0A140T9L7;A0A140TA41;A0A140TA52;P22105;P22105-3;P22105-4	0.579998	0.579998	4.2151e-08	1.11384e-07	48	A0A087X0I0;A0A140T8Y3;A0A140T8Z8;A0A140T9C0;A0A140T9L7;A0A140TA41;A0A140TA52;P22105;P22105-3;P22105-4	TNXB	Tenascin-X;Tenascin-X;Tenascin-X (Fragment);Tenascin-X;Tenascin-X (Fragment);Tenascin-X;Tenascin-X;Tenascin-X;Isoform 4 of Tenascin-X;Isoform 5 of Tenascin-X	A0A087X0I0_HUMAN;A0A140T8Y3_HUMAN;A0A140T8Z8_HUMAN;A0A140T9C0_HUMAN;A0A140T9L7_HUMAN;A0A140TA41_HUMAN;A0A140TA52_HUMAN;TENX_HUMAN;TENX_HUMAN;TENX_HUMAN	1	49.4847	1.49485	Dengue	QC	NaN	NaN	NaN	37.9239	0.176822
Dengue / QC	_DSGVPDRFSGSGSGTDFTLK_	P06310	-0.452404	0.452404	4.22822e-08	1.11678e-07	176	P06310	IGKV2-30	Immunoglobulin kappa variable 2-30	KV230_HUMAN	1	-26.9176	0.730824	Dengue	QC	NaN	NaN	NaN	88.1072	0.0719392
Dengue / QC	_GNPAVSYVR_	Q9Y6R7	1.09745	1.09745	4.29345e-08	1.13296e-07	100	Q9Y6R7	FCGBP	IgGFc-binding protein	FCGBP_HUMAN	1	113.976	2.13976	Dengue	QC	NaN	NaN	NaN	88.5492	0.198561
Dengue / QC	_YLPC[Carbamidomethyl (C)]SVLR_	P29622	0.397054	0.397054	4.33914e-08	1.14449e-07	166	P29622	SERPINA4	Kallistatin	KAIN_HUMAN	1	31.6816	1.31682	Dengue	QC	NaN	NaN	NaN	100.937	0.0737238
Dengue / QC	_SALVLQYLRVPLVDR_	P00740	1.94378	1.94378	4.46124e-08	1.17234e-07	34	P00740	F9	Coagulation factor IX	FA9_HUMAN	1	284.713	3.84713	Dengue	QC	NaN	NaN	NaN	25.8374	0.136438
Dengue / QC	_VLAPATFYAIC[Carbamidomethyl (C)]QQDSC[Carbamidomethyl (C)]HQEQVC[Carbamidomethyl (C)]EVIASYAHLC[Carbamidomethyl (C)]R_	P04275	1.43137	1.43137	4.52605e-08	1.18775e-07	54	P04275	VWF	von Willebrand factor	VWF_HUMAN	1	169.702	2.69702	Dengue	QC	NaN	NaN	NaN	43.2347	0.188715
Dengue / QC	_DLATVYVDVLKDSGR_	P02647	0.329518	0.329518	4.5432e-08	1.19112e-07	162	P02647	APOA1	Apolipoprotein A-I	APOA1_HUMAN	1	25.6593	1.25659	Dengue	QC	NaN	NaN	NaN	82.4608	0.0865164
Dengue / QC	_TPENYPNAGLTR_	P08519	1.85586	1.85586	4.5499e-08	1.19233e-07	80	P08519	LPA	Apolipoprotein(a)	APOA_HUMAN	1	261.968	3.61968	Dengue	QC	NaN	NaN	NaN	66.3139	0.295803
Dengue / QC	_C[Carbamidomethyl (C)]VDVDEC[Carbamidomethyl (C)]APPAEPC[Carbamidomethyl (C)]GK_	P23142	0.52823	0.52823	4.57412e-08	1.19702e-07	146	P23142	FBLN1	Fibulin-1	FBLN1_HUMAN	1	44.2159	1.44216	Dengue	QC	NaN	NaN	NaN	117.019	0.0919515
Dengue / QC	_FTISRDDSKNTLYLQMNSLK_	A0A0B4J1V0	1.38501	1.38501	4.57275e-08	1.19702e-07	26	A0A0B4J1V0	IGHV3-15	Immunoglobulin heavy variable 3-15	HV315_HUMAN	1	161.174	2.61174	Dengue	QC	NaN	NaN	NaN	11.5734	0.596091
Dengue / QC	_FLFDTKEEILMHLWR_	Q96KN2	1.01343	1.01343	4.82267e-08	1.25628e-07	42	Q96KN2	CNDP1	Beta-Ala-His dipeptidase	CNDP1_HUMAN	1	101.871	2.01871	Dengue	QC	NaN	NaN	NaN	35.7138	0.170611
Dengue / QC	_PIC[Carbamidomethyl (C)]LPC[Carbamidomethyl (C)]TMEANLALR_	B4E1Z4	0.689971	0.689971	5.01803e-08	1.30299e-07	94	B4E1Z4	NaN	cDNA FLJ55673, highly similar to Complement factor B (EC 3.4.21.47)	B4E1Z4_HUMAN	1	61.3251	1.61325	Dengue	QC	NaN	NaN	NaN	67.0475	0.140553
Dengue / QC	_SINGILFPGGSVDLR_	Q92820	0.879729	0.879729	5.17006e-08	1.3388e-07	38	Q92820	GGH	Gamma-glutamyl hydrolase	GGH_HUMAN	1	84.0029	1.84003	Dengue	QC	NaN	NaN	NaN	12.8765	0.20145
Dengue / QC	_HPPSPTRDEC[Carbamidomethyl (C)]FAR_	Q16610	1.31593	1.31593	5.39599e-08	1.39286e-07	54	Q16610	ECM1	Extracellular matrix protein 1	ECM1_HUMAN	1	148.963	2.48963	Dengue	QC	NaN	NaN	NaN	43.761	0.284319
Dengue / QC	_GGSTSYGTGSETESPR_	P02671	2.1279	2.1279	5.476e-08	1.41156e-07	116	P02671	FGA	Fibrinogen alpha chain	FIBA_HUMAN	1	337.081	4.37081	Dengue	QC	NaN	NaN	NaN	85.0494	0.331208
Dengue / QC	_GPTQDFR_	P20742	3.70961	3.70961	5.47835e-08	1.41156e-07	30	P20742	PZP	Pregnancy zone protein	PZP_HUMAN	1	1208.29	13.0829	Dengue	QC	NaN	NaN	NaN	21.5855	0.497424
Dengue / QC	_SNFLNC[Carbamidomethyl (C)]YVSGFHPSDIEVDLLK_	P61769	0.905159	0.905159	5.61135e-08	1.4419e-07	128	P61769	B2M	Beta-2-microglobulin	B2MG_HUMAN	1	87.2751	1.87275	Dengue	QC	NaN	NaN	NaN	98.771	0.164071
Dengue / QC	_ANPTVTLFPPSSEELQANKATLVC[Carbamidomethyl (C)]LISDFYPGAVTVAWKADGSPVK_	A0A0B4J231;B9A064	1.47579	1.47579	5.76448e-08	1.47925e-07	50	A0A0B4J231;B9A064	IGLL5	Immunoglobulin lambda-like polypeptide 5	A0A0B4J231_HUMAN;IGLL5_HUMAN	1	178.135	2.78135	Dengue	QC	NaN	NaN	NaN	40.2991	0.286835
Dengue / QC	_VIPAC[Carbamidomethyl (C)]LPSPNYVVADRTEC[Carbamidomethyl (C)]FITGWGETQGTFGAGLLK_	P00747	0.525474	0.525474	5.89299e-08	1.50678e-07	128	P00747	PLG	Plasminogen	PLMN_HUMAN	1	43.9406	1.43941	Dengue	QC	NaN	NaN	NaN	51.0573	0.0889676
Dengue / QC	_LSGALHVYSLGSD_	P80108	0.917941	0.917941	5.91304e-08	1.51055e-07	52	P80108	GPLD1	Phosphatidylinositol-glycan-specific phospholipase D	PHLD_HUMAN	1	88.9416	1.88942	Dengue	QC	NaN	NaN	NaN	28.3083	0.106958
Dengue / QC	_GTVIDVTDFVNWASSINDAPVLISQK_	P02748	0.51611	0.51611	6.12074e-08	1.5598e-07	114	P02748	C9	Complement component C9	CO9_HUMAN	1	43.0094	1.43009	Dengue	QC	NaN	NaN	NaN	97.8224	0.104187
Dengue / QC	_GYQLSDVDGVTC[Carbamidomethyl (C)]EDIDEC[Carbamidomethyl (C)]ALPTGGHIC[Carbamidomethyl (C)]SYR_	P23142	0.959799	0.959799	6.26952e-08	1.59516e-07	106	P23142	FBLN1	Fibulin-1	FBLN1_HUMAN	1	94.5039	1.94504	Dengue	QC	NaN	NaN	NaN	86.634	0.132167
Dengue / QC	_LAKTYETTLEKC[Carbamidomethyl (C)]C[Carbamidomethyl (C)]AAADPHEC[Carbamidomethyl (C)]YAK_	P02768	2.01189	2.01189	6.28852e-08	1.59785e-07	152	P02768	ALB	Serum albumin	ALBU_HUMAN	1	303.31	4.0331	Dengue	QC	NaN	NaN	NaN	120.158	0.337325
Dengue / QC	_NGNMAGISDQR_	P05546	0.442383	0.442383	6.32344e-08	1.60529e-07	98	P05546	SERPIND1	Heparin cofactor 2	HEP2_HUMAN	1	35.8847	1.35885	Dengue	QC	NaN	NaN	NaN	83.0885	0.074473
Dengue / QC	_SHC[Carbamidomethyl (C)]IAEVENDEMPADLPSLAADFVESKDVC[Carbamidomethyl (C)]K_	P02768	0.671469	0.671469	6.33979e-08	1.60872e-07	176	P02768	ALB	Serum albumin	ALBU_HUMAN	1	59.2694	1.59269	Dengue	QC	NaN	NaN	NaN	126.194	0.11716
Dengue / QC	_LEAGINQLSFPLSSEPIQGSYR_	P20742	2.74092	2.74092	6.41402e-08	1.62538e-07	58	P20742	PZP	Pregnancy zone protein	PZP_HUMAN	1	568.497	6.68497	Dengue	QC	NaN	NaN	NaN	40.2588	0.379115
Dengue / QC	_LLIYDASNR_	P04433	-0.65728	0.65728	6.44532e-08	1.63186e-07	176	P04433	IGKV3-11	Immunoglobulin kappa variable 3-11	KV311_HUMAN	1	-36.5927	0.634073	Dengue	QC	NaN	NaN	NaN	48.002	0.103484
Dengue / QC	_NELIPLIYLENPRR_	P20742	1.89076	1.89076	6.4739e-08	1.63764e-07	142	P20742	PZP	Pregnancy zone protein	PZP_HUMAN	1	270.83	3.7083	Dengue	QC	NaN	NaN	NaN	101.492	0.304796
Dengue / QC	_IIPFNRLTIGEGQQHHLGGAK_	P02679	1.46667	1.46667	6.6285e-08	1.67525e-07	32	P02679	FGG	Fibrinogen gamma chain	FIBG_HUMAN	1	176.384	2.76384	Dengue	QC	NaN	NaN	NaN	25.943	0.153133
Dengue / QC	_GATTSPGVYELSSR_	Q9Y6R7	0.949148	0.949148	6.67479e-08	1.68545e-07	132	Q9Y6R7	FCGBP	IgGFc-binding protein	FCGBP_HUMAN	1	93.0732	1.93073	Dengue	QC	NaN	NaN	NaN	109.51	0.162244
Dengue / QC	_TLSDVLQYVK_	P48740-2	0.836998	0.836998	6.78369e-08	1.70991e-07	38	P48740-2	MASP1	Isoform 2 of Mannan-binding lectin serine protease 1	MASP1_HUMAN	1	78.6329	1.78633	Dengue	QC	NaN	NaN	NaN	18.7355	0.129378
Dengue / QC	_ANLSSQALQMSLDYGFVTPLTSMSIR_	P19827	1.59522	1.59522	6.86909e-08	1.72726e-07	28	P19827	ITIH1	Inter-alpha-trypsin inhibitor heavy chain H1	ITIH1_HUMAN	1	202.141	3.02141	Dengue	QC	NaN	NaN	NaN	18.9074	0.164289
Dengue / QC	_GQELC[Carbamidomethyl (C)]ADYSENTFTEYK_	P02774;P02774-3	0.259297	0.259297	6.92958e-08	1.74051e-07	116	P02774;P02774-3	GC	Vitamin D-binding protein;Isoform 3 of Vitamin D-binding protein	VTDB_HUMAN	1	19.6895	1.1969	Dengue	QC	NaN	NaN	NaN	99.7697	0.0882563
Dengue / QC	_QLSLPETGELDSATLK_	P14780	0.698933	0.698933	7.09919e-08	1.77996e-07	58	P14780	MMP9	Matrix metalloproteinase-9	MMP9_HUMAN	1	62.3303	1.6233	Dengue	QC	NaN	NaN	NaN	20.4585	0.135902
Dengue / QC	_LGPNYLHIPVNC[Carbamidomethyl (C)]PYR_	P04040	1.35182	1.35182	7.11035e-08	1.78184e-07	52	P04040	CAT	Catalase	CATA_HUMAN	1	155.234	2.55234	Dengue	QC	NaN	NaN	NaN	29.5446	0.191599
Dengue / QC	_VSNKGLPSSIEK_	P01861	1.64029	1.64029	7.12105e-08	1.78309e-07	164	P01861	IGHG4	Immunoglobulin heavy constant gamma 4	IGHG4_HUMAN	1	211.729	3.11729	Dengue	QC	NaN	NaN	NaN	114.762	0.24632
Dengue / QC	_ESGPVLVKPTETLTLTC[Carbamidomethyl (C)]TVSGFSLSNAR_	A0A0B4J1V2	0.959719	0.959719	7.15445e-08	1.79066e-07	78	A0A0B4J1V2	IGHV2-26	Immunoglobulin heavy variable 2-26	HV226_HUMAN	1	94.4932	1.94493	Dengue	QC	NaN	NaN	NaN	66.744	0.172701
Dengue / QC	_C[Carbamidomethyl (C)]C[Carbamidomethyl (C)]VEC[Carbamidomethyl (C)]PPC[Carbamidomethyl (C)]PAPPVAGPSVFLFPPKPKDTLMISR_	P01859	1.78537	1.78537	7.449e-08	1.86192e-07	42	P01859	IGHG2	Immunoglobulin heavy constant gamma 2	IGHG2_HUMAN	1	244.707	3.44707	Dengue	QC	NaN	NaN	NaN	36.554	0.240919
Dengue / QC	_SVPSDIFQIQATTIYANTINTFR_	Q12805;Q12805-2;Q12805-4	0.941535	0.941535	7.46412e-08	1.86488e-07	62	Q12805;Q12805-2;Q12805-4	EFEMP1	EGF-containing fibulin-like extracellular matrix protein 1;Isoform 2 of EGF-containing fibulin-like extracellular matrix protein 1;Isoform 4 of EGF-containing fibulin-like extracellular matrix protein 1	FBLN3_HUMAN	1	92.0571	1.92057	Dengue	QC	NaN	NaN	NaN	43.7804	0.180867
Dengue / QC	_LKHELTDEELQSLFTNFANVVDK_	P43652	0.70528	0.70528	7.55233e-08	1.88443e-07	108	P43652	AFM	Afamin	AFAM_HUMAN	1	63.0461	1.63046	Dengue	QC	NaN	NaN	NaN	85.1573	0.131454
Dengue / QC	_SLWDFLK_	P04114	0.497995	0.497995	7.80227e-08	1.93744e-07	98	P04114	APOB	Apolipoprotein B-100	APOB_HUMAN	1	41.225	1.41225	Dengue	QC	NaN	NaN	NaN	60.1664	0.127993
Dengue / QC	_GEYEEHLGILGPIIR_	A0A0A0MRJ7;P12259	0.37389	0.37389	7.79789e-08	1.93744e-07	134	A0A0A0MRJ7;P12259	F5	Coagulation factor V	A0A0A0MRJ7_HUMAN;FA5_HUMAN	1	29.5842	1.29584	Dengue	QC	NaN	NaN	NaN	99.6237	0.081098
Dengue / QC	_KVETNMAFSPFSIASLLTQVLLGAGENTK_	P05155;P05155-3	0.648584	0.648584	7.83924e-08	1.94577e-07	90	P05155;P05155-3	SERPING1	Plasma protease C1 inhibitor;Isoform 3 of Plasma protease C1 inhibitor	IC1_HUMAN	1	56.7629	1.56763	Dengue	QC	NaN	NaN	NaN	30.7711	0.125829
Dengue / QC	_VLRENADSLQASLRPHADELK_	P06727	0.462081	0.462081	7.85344e-08	1.94783e-07	162	P06727	APOA4	Apolipoprotein A-IV	APOA4_HUMAN	1	37.7527	1.37753	Dengue	QC	NaN	NaN	NaN	114.154	0.091295
Dengue / QC	_KEDSC[Carbamidomethyl (C)]QLGYSAGPC[Carbamidomethyl (C)]M[Oxidation (M)]GMTSR_	P02760	1.14974	1.14974	8.02713e-08	1.98721e-07	26	P02760	AMBP	Protein AMBP	AMBP_HUMAN	1	121.874	2.21874	Dengue	QC	NaN	NaN	NaN	20.1594	0.169651
Dengue / QC	_EYLIMGLDGATYDLEGHPQYLLDSNSWIEEMPSER_	P0C0L5	0.409416	0.409416	8.05744e-08	1.99384e-07	36	P0C0L5	C4B	Complement C4-B	CO4B_HUMAN	1	32.8148	1.32815	Dengue	QC	NaN	NaN	NaN	15.307	0.470644
Dengue / QC	_DRDGNTLTYYR_	P02748	-0.431433	0.431433	8.23222e-08	2.03443e-07	172	P02748	C9	Complement component C9	CO9_HUMAN	1	-25.8475	0.741525	Dengue	QC	NaN	NaN	NaN	75.1682	0.0735355
Dengue / QC	_APGWDPLC[Carbamidomethyl (C)]WDEC[Carbamidomethyl (C)]R_	Q9Y6R7	1.72336	1.72336	8.28606e-08	2.04685e-07	56	Q9Y6R7	FCGBP	IgGFc-binding protein	FCGBP_HUMAN	1	230.205	3.30205	Dengue	QC	NaN	NaN	NaN	42.4381	0.25378
Dengue / QC	_SGGRTEHPFTVEEFVLPK_	P01023	-0.470545	0.470545	8.32964e-08	2.05672e-07	176	P01023	A2M	Alpha-2-macroglobulin	A2MG_HUMAN	1	-27.8308	0.721692	Dengue	QC	NaN	NaN	NaN	53.2389	0.0789443
Dengue / QC	_IVEGSDAEIGMSPWQVMLFR_	P00734	0.507996	0.507996	8.4174e-08	2.07641e-07	176	P00734	F2	Prothrombin	THRB_HUMAN	1	42.2074	1.42207	Dengue	QC	NaN	NaN	NaN	113.618	0.0825683
Dengue / QC	_FLMKGPNK_	P08603	1.23009	1.23009	8.44497e-08	2.08158e-07	62	P08603	CFH	Complement factor H	CFAH_HUMAN	1	134.582	2.34582	Dengue	QC	NaN	NaN	NaN	49.1816	0.1947
Dengue / QC	_IPC[Carbamidomethyl (C)]FLAGDTR_	P05164;P05164-2;P05164-3	1.72956	1.72956	8.48478e-08	2.08991e-07	22	P05164;P05164-2;P05164-3	MPO	Myeloperoxidase;Isoform H14 of Myeloperoxidase;Isoform H7 of Myeloperoxidase	PERM_HUMAN	1	231.627	3.31627	Dengue	QC	NaN	NaN	NaN	16.0843	0.186248
Dengue / QC	_SLEVTFTPVIEDIGK_	P19320	0.857504	0.857504	8.63423e-08	2.12087e-07	34	P19320	VCAM1	Vascular cell adhesion protein 1	VCAM1_HUMAN	1	81.19	1.8119	Dengue	QC	NaN	NaN	NaN	27.2063	0.168154
Dengue / QC	_ITFELVYEELLKR_	Q14624	0.585052	0.585052	8.71342e-08	2.13847e-07	126	Q14624	ITIH4	Inter-alpha-trypsin inhibitor heavy chain H4	ITIH4_HUMAN	1	50.0094	1.50009	Dengue	QC	NaN	NaN	NaN	67.9164	0.10205
Dengue / QC	_EGKEYGVVLAPDGSTVAVEPLLAGLEAGLQGR_	Q96PD5	0.756398	0.756398	8.72315e-08	2.13902e-07	172	Q96PD5	PGLYRP2	N-acetylmuramoyl-L-alanine amidase	PGRP2_HUMAN	1	68.9268	1.68927	Dengue	QC	NaN	NaN	NaN	89.0118	0.119871
Dengue / QC	_VSTLPAITLK_	A0A1B0GV23;A0A1B0GVD5;A0A1B0GWE8;P07339	0.950455	0.950455	8.72293e-08	2.13902e-07	38	A0A1B0GV23;A0A1B0GVD5;A0A1B0GWE8;P07339	CTSD	Cathepsin D	A0A1B0GV23_HUMAN;A0A1B0GVD5_HUMAN;A0A1B0GWE8_HUMAN;CATD_HUMAN	1	93.2482	1.93248	Dengue	QC	NaN	NaN	NaN	32.2588	0.141832
Dengue / QC	_AFLEVNEEGSEAAASTAVVIAGR_	P01008	0.863529	0.863529	8.79846e-08	2.15655e-07	124	P01008	SERPINC1	Antithrombin-III	ANT3_HUMAN	1	81.9483	1.81948	Dengue	QC	NaN	NaN	NaN	93.9448	0.126043
Dengue / QC	_EIPDEISILLLGVAHFK_	P36955	0.872842	0.872842	8.94961e-08	2.19077e-07	134	P36955	SERPINF1	Pigment epithelium-derived factor	PEDF_HUMAN	1	83.1267	1.83127	Dengue	QC	NaN	NaN	NaN	88.7019	0.110973
Dengue / QC	_ALGISPFHEHAEVVFTANDSGPR_	P02766	0.382899	0.382899	8.9781e-08	2.19679e-07	176	P02766	TTR	Transthyretin	TTHY_HUMAN	1	30.396	1.30396	Dengue	QC	NaN	NaN	NaN	107.524	0.0674011
Dengue / QC	_SFTIEC[Carbamidomethyl (C)]R_	J3QQR8;J3QQX6;J3QRQ1;P13598	0.499609	0.499609	8.98325e-08	2.19711e-07	38	J3QQR8;J3QQX6;J3QRQ1;P13598	ICAM2	Intercellular adhesion molecule 2 (Fragment);Intercellular adhesion molecule 2 (Fragment);Intercellular adhesion molecule 2 (Fragment);Intercellular adhesion molecule 2	J3QQR8_HUMAN;J3QQX6_HUMAN;J3QRQ1_HUMAN;ICAM2_HUMAN	1	41.383	1.41383	Dengue	QC	NaN	NaN	NaN	28.7392	0.123066
Dengue / QC	_QRPPDLDTSSNAVDLLFFTDESGDSR_	B4DPQ0	0.65545	0.65545	9.09314e-08	2.22207e-07	92	B4DPQ0	C1R	Complement C1r subcomponent	B4DPQ0_HUMAN	1	57.5107	1.57511	Dengue	QC	NaN	NaN	NaN	75.1304	0.113514
Dengue / QC	_DEPTYILNIK_	P04114	0.567068	0.567068	9.24795e-08	2.25523e-07	58	P04114	APOB	Apolipoprotein B-100	APOB_HUMAN	1	48.151	1.48151	Dengue	QC	NaN	NaN	NaN	48.1988	0.140625
Dengue / QC	_HQQTVTIPPKSSLSVPYVIVPLKTGLQEVEVK_	P01024	1.02849	1.02849	9.26282e-08	2.25771e-07	134	P01024	C3	Complement C3	CO3_HUMAN	1	103.989	2.03989	Dengue	QC	NaN	NaN	NaN	123.56	0.144541
Dengue / QC	_LISVDTEHSNIYLQNGPDRIGR_	P00450	0.704256	0.704256	9.33433e-08	2.27417e-07	102	P00450	CP	Ceruloplasmin	CERU_HUMAN	1	62.9304	1.6293	Dengue	QC	NaN	NaN	NaN	54.8329	0.0965946
Dengue / QC	_SGIPIVTSPYQIHFTKTPK_	P01024	1.66577	1.66577	9.44842e-08	2.29999e-07	130	P01024	C3	Complement C3	CO3_HUMAN	1	217.282	3.17282	Dengue	QC	NaN	NaN	NaN	109.502	0.238887
Dengue / QC	_LSQLSVTDVTTSSLR_	A0A087X0I0;A0A140T8Y3;A0A140T8Z8;A0A140T9C0;A0A140T9L7;A0A140TA41;A0A140TA52;P22105;P22105-3;P22105-4	0.522208	0.522208	9.48081e-08	2.3059e-07	70	A0A087X0I0;A0A140T8Y3;A0A140T8Z8;A0A140T9C0;A0A140T9L7;A0A140TA41;A0A140TA52;P22105;P22105-3;P22105-4	TNXB	Tenascin-X;Tenascin-X;Tenascin-X (Fragment);Tenascin-X;Tenascin-X (Fragment);Tenascin-X;Tenascin-X;Tenascin-X;Isoform 4 of Tenascin-X;Isoform 5 of Tenascin-X	A0A087X0I0_HUMAN;A0A140T8Y3_HUMAN;A0A140T8Z8_HUMAN;A0A140T9C0_HUMAN;A0A140T9L7_HUMAN;A0A140TA41_HUMAN;A0A140TA52_HUMAN;TENX_HUMAN;TENX_HUMAN;TENX_HUMAN	1	43.6152	1.43615	Dengue	QC	NaN	NaN	NaN	62.0245	0.125691
Dengue / QC	_SETKDLLFRDDTVC[Carbamidomethyl (C)]LAK_	P02787	0.471292	0.471292	9.50877e-08	2.31171e-07	176	P02787	TF	Serotransferrin	TRFE_HUMAN	1	38.635	1.38635	Dengue	QC	NaN	NaN	NaN	125.197	0.0674416
Dengue / QC	_KC[Carbamidomethyl (C)]DPTEVELDNQIVTATQSNIC[Carbamidomethyl (C)]DEDSATETC[Carbamidomethyl (C)]YTYDR_	P01591	1.5309	1.5309	9.60091e-08	2.33112e-07	54	P01591	JCHAIN	Immunoglobulin J chain	IGJ_HUMAN	1	188.966	2.88966	Dengue	QC	NaN	NaN	NaN	29.3593	0.165562
Dengue / QC	_SKMLTPEHVFIHPGWK_	P09871	2.97508	2.97508	9.64337e-08	2.34043e-07	26	P09871	C1S	Complement C1s subcomponent	C1S_HUMAN	1	686.299	7.86299	Dengue	QC	NaN	NaN	NaN	18.0435	0.316421
Dengue / QC	_LPLEYSYGEYRDLFR_	P07358	0.390326	0.390326	9.75838e-08	2.36632e-07	84	P07358	C8B	Complement component C8 beta chain	CO8B_HUMAN	1	31.069	1.31069	Dengue	QC	NaN	NaN	NaN	78.9068	0.0811796
Dengue / QC	_ENFVLTTAK_	P22891;P22891-2	0.516373	0.516373	1.005e-07	2.43289e-07	56	P22891;P22891-2	PROZ	Vitamin K-dependent protein Z;Isoform 2 of Vitamin K-dependent protein Z	PROZ_HUMAN	1	43.0355	1.43035	Dengue	QC	NaN	NaN	NaN	50.1341	0.106901
Dengue / QC	_TEHGSEMLFFGNAIEGK_	P04114	0.590985	0.590985	1.01314e-07	2.45155e-07	128	P04114	APOB	Apolipoprotein B-100	APOB_HUMAN	1	50.6275	1.50628	Dengue	QC	NaN	NaN	NaN	118.29	0.102438
Dengue / QC	_AQTTVTC[Carbamidomethyl (C)]MENGWSPTPR_	P08603	0.344478	0.344478	1.01736e-07	2.45967e-07	176	P08603	CFH	Complement factor H	CFAH_HUMAN	1	26.9692	1.26969	Dengue	QC	NaN	NaN	NaN	117.071	0.0562338
Dengue / QC	_TMSGLEC[Carbamidomethyl (C)]QAWDSQSPHAHGYIPSKFPNKNLK_	P00747	0.928544	0.928544	1.03242e-07	2.49395e-07	96	P00747	PLG	Plasminogen	PLMN_HUMAN	1	90.3354	1.90335	Dengue	QC	NaN	NaN	NaN	84.5352	0.137446
Dengue / QC	_AHVDALR_	P02647	0.526736	0.526736	1.0562e-07	2.54598e-07	158	P02647	APOA1	Apolipoprotein A-I	APOA1_HUMAN	1	44.0666	1.44067	Dengue	QC	NaN	NaN	NaN	107.642	0.103732
Dengue / QC	_VYC[Carbamidomethyl (C)]DM[Oxidation (M)]NTENGGWTVIQNR_	P02675	2.47028	2.47028	1.07584e-07	2.59003e-07	34	P02675	FGB	Fibrinogen beta chain	FIBB_HUMAN	1	454.151	5.54151	Dengue	QC	NaN	NaN	NaN	8.88106	0.165488
Dengue / QC	_NNNEKDMALTAFVLISLQEAK_	P01024	0.917578	0.917578	1.07869e-07	2.59579e-07	138	P01024	C3	Complement C3	CO3_HUMAN	1	88.8941	1.88894	Dengue	QC	NaN	NaN	NaN	101.263	0.160057
Dengue / QC	_TIKVPMMYGAGK_	G3V2W1;Q9UK55	0.703446	0.703446	1.09545e-07	2.63278e-07	40	G3V2W1;Q9UK55	SERPINA10	Protein Z-dependent protease inhibitor	G3V2W1_HUMAN;ZPI_HUMAN	1	62.839	1.62839	Dengue	QC	NaN	NaN	NaN	18.7442	0.101015
Dengue / QC	_DSPSVWAAVPGK_	P07737	1.43681	1.43681	1.11777e-07	2.68303e-07	28	P07737	PFN1	Profilin-1	PROF1_HUMAN	1	170.721	2.70721	Dengue	QC	NaN	NaN	NaN	19.6864	0.139128
Dengue / QC	_KQLGAGSIEEC[Carbamidomethyl (C)]AAKC[Carbamidomethyl (C)]EEDEEFTC[Carbamidomethyl (C)]R_	P00747	0.581179	0.581179	1.12371e-07	2.69615e-07	150	P00747	PLG	Plasminogen	PLMN_HUMAN	1	49.6072	1.49607	Dengue	QC	NaN	NaN	NaN	132.208	0.10614
Dengue / QC	_IDTINLFPATLFDAYMVAQNPGEWMLSC[Carbamidomethyl (C)]QNLNHLK_	P00450	0.753454	0.753454	1.14047e-07	2.73174e-07	90	P00450	CP	Ceruloplasmin	CERU_HUMAN	1	68.5824	1.68582	Dengue	QC	NaN	NaN	NaN	27.7945	0.127861
Dengue / QC	_M[Oxidation (M)]RPSTDTITVM[Oxidation (M)]VENSHGLR_	P0C0L5	0.254902	0.254902	1.15591e-07	2.76641e-07	22	P0C0L5	C4B	Complement C4-B	CO4B_HUMAN	1	19.3255	1.19325	Dengue	QC	NaN	NaN	NaN	9.53287	0.368007
Dengue / QC	_AFQPFFVELTMPYSVIRGEAFTLK_	P01023	0.781469	0.781469	1.19068e-07	2.83885e-07	120	P01023	A2M	Alpha-2-macroglobulin	A2MG_HUMAN	1	71.888	1.71888	Dengue	QC	NaN	NaN	NaN	89.6527	0.135498
Dengue / QC	_LWAYLTINQLLAER_	P19823	1.14108	1.14108	1.22012e-07	2.90539e-07	60	P19823	ITIH2	Inter-alpha-trypsin inhibitor heavy chain H2	ITIH2_HUMAN	1	120.546	2.20546	Dengue	QC	NaN	NaN	NaN	28.9857	0.187214
Dengue / QC	_AGFSWIEVTFK_	Q14624	0.615622	0.615622	1.23497e-07	2.93584e-07	56	Q14624	ITIH4	Inter-alpha-trypsin inhibitor heavy chain H4	ITIH4_HUMAN	1	53.2218	1.53222	Dengue	QC	NaN	NaN	NaN	49.0461	0.0990064
Dengue / QC	_HRQGPVNLLSDPEQGVEVTGQYEREK_	Q14624	0.957054	0.957054	1.24142e-07	2.94992e-07	160	Q14624	ITIH4	Inter-alpha-trypsin inhibitor heavy chain H4	ITIH4_HUMAN	1	94.1342	1.94134	Dengue	QC	NaN	NaN	NaN	143.284	0.153078
Dengue / QC	_EMEDTLNHLK_	A6XND0;P17936;P17936-2	0.56455	0.56455	1.24758e-07	2.95986e-07	102	A6XND0;P17936;P17936-2	IGFBP3	Insulin-like growth factor-binding protein 3;Insulin-like growth factor-binding protein 3;Isoform 2 of Insulin-like growth factor-binding protein 3	A6XND0_HUMAN;IBP3_HUMAN;IBP3_HUMAN	1	47.8926	1.47893	Dengue	QC	NaN	NaN	NaN	46.6808	0.194929
Dengue / QC	_TIHLTMPQLVLQGSYDLQDLLAQAELPAILHTELNLQK_	P01019	1.10364	1.10364	1.24679e-07	2.95986e-07	84	P01019	AGT	Angiotensinogen	ANGT_HUMAN	1	114.896	2.14896	Dengue	QC	NaN	NaN	NaN	42.6026	0.152283
Dengue / QC	_TLLVEAEGIEQEK_	P20742	2.55252	2.55252	1.26438e-07	2.99697e-07	90	P20742	PZP	Pregnancy zone protein	PZP_HUMAN	1	486.66	5.8666	Dengue	QC	NaN	NaN	NaN	61.8186	0.442911
Dengue / QC	_GSESGIFTNTK_	P02671	1.5773	1.5773	1.31084e-07	3.09677e-07	164	P02671	FGA	Fibrinogen alpha chain	FIBA_HUMAN	1	198.411	2.98411	Dengue	QC	NaN	NaN	NaN	126.302	0.252353
Dengue / QC	_LLDLVFLLDGSSR_	P04275	0.925727	0.925727	1.31185e-07	3.09787e-07	28	P04275	VWF	von Willebrand factor	VWF_HUMAN	1	89.9641	1.89964	Dengue	QC	NaN	NaN	NaN	17.8281	0.17084
Dengue / QC	_NRC[Carbamidomethyl (C)]PPPPLPINSK_	P05160	0.813868	0.813868	1.3524e-07	3.18624e-07	82	P05160	F13B	Coagulation factor XIII B chain	F13B_HUMAN	1	75.7918	1.75792	Dengue	QC	NaN	NaN	NaN	66.6901	0.12238
Dengue / QC	_EVKIDGQFR_	P04114	0.968632	0.968632	1.36199e-07	3.20297e-07	30	P04114	APOB	Apolipoprotein B-100	APOB_HUMAN	1	95.6985	1.95698	Dengue	QC	NaN	NaN	NaN	14.6653	0.206154
Dengue / QC	_SILQMSLDHHIVTPLTSLVIENEAGDER_	P19823	0.563099	0.563099	1.39971e-07	3.28758e-07	176	P19823	ITIH2	Inter-alpha-trypsin inhibitor heavy chain H2	ITIH2_HUMAN	1	47.744	1.47744	Dengue	QC	NaN	NaN	NaN	145.962	0.0950296
Dengue / QC	_TPC[Carbamidomethyl (C)]EEILVK_	P21333;P21333-2;Q5HY54	0.588376	0.588376	1.41658e-07	3.32308e-07	78	P21333;P21333-2;Q5HY54	FLNA	Filamin-A;Isoform 2 of Filamin-A;Filamin-A	FLNA_HUMAN;FLNA_HUMAN;Q5HY54_HUMAN	1	50.3553	1.50355	Dengue	QC	NaN	NaN	NaN	64.5332	0.108232
Dengue / QC	_NANFKFTDHLK_	P00738	2.36358	2.36358	1.42808e-07	3.34868e-07	86	P00738	HP	Haptoglobin	HPT_HUMAN	1	414.647	5.14647	Dengue	QC	NaN	NaN	NaN	59.2452	0.318693
Dengue / QC	_NELIPLIYLENPR_	P20742	1.83545	1.83545	1.46043e-07	3.41748e-07	52	P20742	PZP	Pregnancy zone protein	PZP_HUMAN	1	256.882	3.56882	Dengue	QC	NaN	NaN	NaN	41.2942	0.400971
Dengue / QC	_MVQEQC[Carbamidomethyl (C)]C[Carbamidomethyl (C)]HSQLEELHC[Carbamidomethyl (C)]ATGISLANEQDR_	P23142	0.66527	0.66527	1.51498e-07	3.53786e-07	148	P23142	FBLN1	Fibulin-1	FBLN1_HUMAN	1	58.5865	1.58587	Dengue	QC	NaN	NaN	NaN	143.103	0.11029
Dengue / QC	_YPIEHGIITNWDDMEKIWHHTFYNELR_	P68032;P68133	1.32791	1.32791	1.52718e-07	3.56488e-07	38	P68032;P68133	ACTC1;ACTA1	Actin, alpha cardiac muscle 1;Actin, alpha skeletal muscle	ACTC_HUMAN;ACTS_HUMAN	1	151.039	2.51039	Dengue	QC	NaN	NaN	NaN	33.059	0.163376
Dengue / QC	_VKLIANTLC[Carbamidomethyl (C)]NSR_	Q14520;Q14520-2	0.415937	0.415937	1.53041e-07	3.56781e-07	136	Q14520;Q14520-2	HABP2	Hyaluronan-binding protein 2;Isoform 2 of Hyaluronan-binding protein 2	HABP2_HUMAN	1	33.4165	1.33417	Dengue	QC	NaN	NaN	NaN	68.2873	0.101099
Dengue / QC	_EC[Carbamidomethyl (C)]NNPPPSGGGR_	P10643	0.606646	0.606646	1.55521e-07	3.61992e-07	110	P10643	C7	Complement component C7	CO7_HUMAN	1	52.2715	1.52271	Dengue	QC	NaN	NaN	NaN	103.996	0.128235
Dengue / QC	_C[Carbamidomethyl (C)]C[Carbamidomethyl (C)]QDGVTRLPMMR_	P0C0L5	1.25301	1.25301	1.58579e-07	3.68054e-07	176	P0C0L5	C4B	Complement C4-B	CO4B_HUMAN	1	138.338	2.38338	Dengue	QC	NaN	NaN	NaN	141.8	0.19673
Dengue / QC	_NTGMETPTGVC[Carbamidomethyl (C)]AALAAAGVQPHSLDLSHNSLR_	P08571	0.367823	0.367823	1.59264e-07	3.6919e-07	130	P08571	CD14	Monocyte differentiation antigen CD14	CD14_HUMAN	1	29.0404	1.2904	Dengue	QC	NaN	NaN	NaN	69.0809	0.0984141
Dengue / QC	_YKDGDQC[Carbamidomethyl (C)]ETSPC[Carbamidomethyl (C)]QNQGK_	P00742	0.914135	0.914135	1.5923e-07	3.6919e-07	54	P00742	F10	Coagulation factor X	FA10_HUMAN	1	88.4439	1.88444	Dengue	QC	NaN	NaN	NaN	23.8001	0.111617
Dengue / QC	_ARANLQSVPHASASRPR_	O14791;O14791-2	1.19824	1.19824	1.60186e-07	3.71026e-07	34	O14791;O14791-2	APOL1	Apolipoprotein L1;Isoform 2 of Apolipoprotein L1	APOL1_HUMAN	1	129.459	2.29459	Dengue	QC	NaN	NaN	NaN	28.5879	0.156475
Dengue / QC	_DSITTWEILAVSM[Oxidation (M)]SDKK_	P01024	0.977637	0.977637	1.61073e-07	3.72776e-07	44	P01024	C3	Complement C3	CO3_HUMAN	1	96.9237	1.96924	Dengue	QC	NaN	NaN	NaN	28.9298	0.115039
Dengue / QC	_MAESGYDIALLK_	P03951	1.53842	1.53842	1.63634e-07	3.78241e-07	30	P03951	F11	Coagulation factor XI	FA11_HUMAN	1	190.475	2.90475	Dengue	QC	NaN	NaN	NaN	18.4821	0.205774
Dengue / QC	_LVDEDMNSFK_	Q06033;Q06033-2	-0.47831	0.47831	1.64871e-07	3.80945e-07	172	Q06033;Q06033-2	ITIH3	Inter-alpha-trypsin inhibitor heavy chain H3;Isoform 2 of Inter-alpha-trypsin inhibitor heavy chain H3	ITIH3_HUMAN	1	-28.2182	0.717818	Dengue	QC	NaN	NaN	NaN	61.5647	0.0781381
Dengue / QC	_ITEVALMGHLSC[Carbamidomethyl (C)]DTKEER_	P04114	0.303798	0.303798	1.65233e-07	3.81626e-07	118	P04114	APOB	Apolipoprotein B-100	APOB_HUMAN	1	23.439	1.23439	Dengue	QC	NaN	NaN	NaN	85.7418	0.0599711
Dengue / QC	_ITINPDTSKNQFSLQLNSVTPEDTAVYYC[Carbamidomethyl (C)]AR_	A0A0B4J1U7	1.40527	1.40527	1.69208e-07	3.90491e-07	24	A0A0B4J1U7	IGHV6-1	Immunoglobulin heavy variable 6-1	HV601_HUMAN	1	164.867	2.64867	Dengue	QC	NaN	NaN	NaN	17.7185	0.304922
Dengue / QC	_LFSLKPTSGPVLTVTLFGR_	O95497	2.07584	2.07584	1.69727e-07	3.9137e-07	28	O95497	VNN1	Pantetheinase	VNN1_HUMAN	1	321.588	4.21588	Dengue	QC	NaN	NaN	NaN	19.8778	0.257669
Dengue / QC	_EHGDPLIEELNPGDALEPEGR_	A0A0C4DFP6;Q9NQ79;Q9NQ79-2	1.12869	1.12869	1.70881e-07	3.93872e-07	40	A0A0C4DFP6;Q9NQ79;Q9NQ79-2	CRTAC1	Cartilage acidic protein 1;Cartilage acidic protein 1;Isoform 2 of Cartilage acidic protein 1	A0A0C4DFP6_HUMAN;CRAC1_HUMAN;CRAC1_HUMAN	1	118.661	2.18661	Dengue	QC	NaN	NaN	NaN	29.5697	0.172451
Dengue / QC	_TNGVC[Carbamidomethyl (C)]VDWR_	P04275	1.23609	1.23609	1.73702e-07	4.00212e-07	46	P04275	VWF	von Willebrand factor	VWF_HUMAN	1	135.559	2.35559	Dengue	QC	NaN	NaN	NaN	35.0689	0.183299
Dengue / QC	_IMADSGPIYDK_	P07996	0.859997	0.859997	1.75439e-07	4.04049e-07	34	P07996	THBS1	Thrombospondin-1	TSP1_HUMAN	1	81.5035	1.81503	Dengue	QC	NaN	NaN	NaN	19.9784	0.120582
Dengue / QC	_RNPFVFAPTLLTVAVHFEEVAK_	P43652	0.962569	0.962569	1.77551e-07	4.08583e-07	120	P43652	AFM	Afamin	AFAM_HUMAN	1	94.8776	1.94878	Dengue	QC	NaN	NaN	NaN	56.4495	0.155911
Dengue / QC	_TRPHWC[Carbamidomethyl (C)]C[Carbamidomethyl (C)]TR_	Q16610	1.54455	1.54455	1.78378e-07	4.10319e-07	46	Q16610	ECM1	Extracellular matrix protein 1	ECM1_HUMAN	1	191.714	2.91714	Dengue	QC	NaN	NaN	NaN	37.9117	0.258353
Dengue / QC	_LPGDIQVVPIGVGPNANVQELER_	P04275	0.736694	0.736694	1.79136e-07	4.1173e-07	104	P04275	VWF	von Willebrand factor	VWF_HUMAN	1	66.6353	1.66635	Dengue	QC	NaN	NaN	NaN	99.51	0.13118
Dengue / QC	_QTSPVSAMLVLVK_	Q12805;Q12805-2;Q12805-4	1.98869	1.98869	1.81911e-07	4.17771e-07	36	Q12805;Q12805-2;Q12805-4	EFEMP1	EGF-containing fibulin-like extracellular matrix protein 1;Isoform 2 of EGF-containing fibulin-like extracellular matrix protein 1;Isoform 4 of EGF-containing fibulin-like extracellular matrix protein 1	FBLN3_HUMAN	1	296.877	3.96877	Dengue	QC	NaN	NaN	NaN	27.4604	0.305852
Dengue / QC	_VAC[Carbamidomethyl (C)]EEPPFIENGAANLHSK_	P05160	0.545475	0.545475	1.83494e-07	4.20556e-07	84	P05160	F13B	Coagulation factor XIII B chain	F13B_HUMAN	1	45.9501	1.4595	Dengue	QC	NaN	NaN	NaN	23.749	0.0690221
Dengue / QC	_ETEGLRQEMSKDLEEVK_	P02647	0.812511	0.812511	1.84177e-07	4.21953e-07	74	P02647	APOA1	Apolipoprotein A-I	APOA1_HUMAN	1	75.6266	1.75627	Dengue	QC	NaN	NaN	NaN	53.496	0.113893
Dengue / QC	_LFDSDPITVTVPVEVSRK_	P10909;P10909-2;P10909-4;P10909-5	0.327517	0.327517	1.85717e-07	4.25309e-07	110	P10909;P10909-2;P10909-4;P10909-5	CLU	Clusterin;Isoform 2 of Clusterin;Isoform 4 of Clusterin;Isoform 5 of Clusterin	CLUS_HUMAN	1	25.4852	1.25485	Dengue	QC	NaN	NaN	NaN	85.5377	0.069367
Dengue / QC	_AQVSPTASDMLHMR_	Q6UXB8	0.723424	0.723424	1.90628e-07	4.35153e-07	46	Q6UXB8	PI16	Peptidase inhibitor 16	PI16_HUMAN	1	65.1096	1.6511	Dengue	QC	NaN	NaN	NaN	32.3168	0.138588
Dengue / QC	_HPDEAAFFDTASTGK_	P02671	1.90548	1.90548	1.90918e-07	4.35639e-07	146	P02671	FGA	Fibrinogen alpha chain	FIBA_HUMAN	1	274.633	3.74633	Dengue	QC	NaN	NaN	NaN	113.175	0.306671
Dengue / QC	_EC[Carbamidomethyl (C)]EEIIR_	P02675	2.19932	2.19932	1.92112e-07	4.38011e-07	98	P02675	FGB	Fibrinogen beta chain	FIBB_HUMAN	1	359.262	4.59262	Dengue	QC	NaN	NaN	NaN	87.3956	0.358762
Dengue / QC	_NTLIIYLDKVSHSEDDC[Carbamidomethyl (C)]LAFK_	P01024	0.530772	0.530772	2.01565e-07	4.58462e-07	146	P01024	C3	Complement C3	CO3_HUMAN	1	44.4702	1.4447	Dengue	QC	NaN	NaN	NaN	119.229	0.106348
Dengue / QC	_APDAGGC[Carbamidomethyl (C)]LHADPDLGVLC[Carbamidomethyl (C)]PTGC[Carbamidomethyl (C)]QLQEALLQQERPIR_	P02675	1.94932	1.94932	2.03046e-07	4.61646e-07	26	P02675	FGB	Fibrinogen beta chain	FIBB_HUMAN	1	286.192	3.86192	Dengue	QC	NaN	NaN	NaN	19.0985	0.231643
Dengue / QC	_SPLFMGK_	P01009	-0.361266	0.361266	2.05124e-07	4.65812e-07	176	P01009	SERPINA1	Alpha-1-antitrypsin	A1AT_HUMAN	1	-22.1519	0.778481	Dengue	QC	NaN	NaN	NaN	82.1601	0.0655658
Dengue / QC	_ASSIIDELFQDRFFTREPQDTYHYLPFSLPHR_	P10909;P10909-2;P10909-4;P10909-5	0.682178	0.682178	2.07576e-07	4.71191e-07	150	P10909;P10909-2;P10909-4;P10909-5	CLU	Clusterin;Isoform 2 of Clusterin;Isoform 4 of Clusterin;Isoform 5 of Clusterin	CLUS_HUMAN	1	60.4561	1.60456	Dengue	QC	NaN	NaN	NaN	89.6779	0.112114
Dengue / QC	_C[Carbamidomethyl (C)]QFFSYATQTFHKAEYR_	H0YAC1;P03952	1.41716	1.41716	2.0816e-07	4.72328e-07	30	H0YAC1;P03952	KLKB1	Plasma kallikrein (Fragment);Plasma kallikrein	H0YAC1_HUMAN;KLKB1_HUMAN	1	167.059	2.67059	Dengue	QC	NaN	NaN	NaN	14.6364	0.163389
Dengue / QC	_WDFDNRPHILHGEYIEFIC[Carbamidomethyl (C)]R_	P05160	1.13324	1.13324	2.09135e-07	4.74161e-07	36	P05160	F13B	Coagulation factor XIII B chain	F13B_HUMAN	1	119.351	2.19351	Dengue	QC	NaN	NaN	NaN	15.5496	0.140546
Dengue / QC	_QAPGQELGWMGR_	A0A075B7D0	-0.446162	0.446162	2.09986e-07	4.75902e-07	176	A0A075B7D0	IGHV1OR15-1	Immunoglobulin heavy variable 1/OR15-1 (non-functional) (Fragment)	A0A075B7D0_HUMAN	1	-26.6007	0.733993	Dengue	QC	NaN	NaN	NaN	134.003	0.0773461
Dengue / QC	_GRTLEIPGNSDPNM[Oxidation (M)]IPDGDFNSYVR_	P0C0L5	1.49564	1.49564	2.17376e-07	4.9048e-07	100	P0C0L5	C4B	Complement C4-B	CO4B_HUMAN	1	181.989	2.81989	Dengue	QC	NaN	NaN	NaN	92.5842	0.276962
Dengue / QC	_HLIVTPSGC[Carbamidomethyl (C)]GEQNMIGM[Oxidation (M)]TPTVIAVHYLDETEQWEK_	P01024	0.991557	0.991557	2.1847e-07	4.92381e-07	44	P01024	C3	Complement C3	CO3_HUMAN	1	98.8329	1.98833	Dengue	QC	NaN	NaN	NaN	22.8168	0.139747
Dengue / QC	_NVVFVIDK_	Q14624	-0.543259	0.543259	2.19608e-07	4.94357e-07	176	Q14624	ITIH4	Inter-alpha-trypsin inhibitor heavy chain H4	ITIH4_HUMAN	1	-31.3781	0.686219	Dengue	QC	NaN	NaN	NaN	39.1184	0.0942542
Dengue / QC	_ATVLNYLPK_	P01023	-0.479095	0.479095	2.19703e-07	4.94376e-07	172	P01023	A2M	Alpha-2-macroglobulin	A2MG_HUMAN	1	-28.2572	0.717428	Dengue	QC	NaN	NaN	NaN	92.4425	0.0845544
Dengue / QC	_STDTSC[Carbamidomethyl (C)]VNPPTVQNAHILSR_	Q03591	0.915327	0.915327	2.21385e-07	4.97962e-07	100	Q03591	CFHR1	Complement factor H-related protein 1	FHR1_HUMAN	1	88.5996	1.886	Dengue	QC	NaN	NaN	NaN	69.2172	0.134322
Dengue / QC	_YEDGTLSLTSTSDLQSGIIK_	P04114	0.395493	0.395493	2.27709e-07	5.09967e-07	138	P04114	APOB	Apolipoprotein B-100	APOB_HUMAN	1	31.5392	1.31539	Dengue	QC	NaN	NaN	NaN	117.33	0.0847198
Dengue / QC	_LMIYDVSK_	P01706	-0.785184	0.785184	2.29673e-07	5.13961e-07	174	P01706	IGLV2-11	Immunoglobulin lambda variable 2-11	LV211_HUMAN	1	-41.9722	0.580278	Dengue	QC	NaN	NaN	NaN	109.904	0.140291
Dengue / QC	_GDELADSALEIFK_	Q15582	1.27457	1.27457	2.3625e-07	5.28263e-07	42	Q15582	TGFBI	Transforming growth factor-beta-induced protein ig-h3	BGH3_HUMAN	1	141.926	2.41926	Dengue	QC	NaN	NaN	NaN	29.3387	0.175581
Dengue / QC	_VVFLNTQLC[Carbamidomethyl (C)]QFRPDAFGGLPR_	P22792	0.311047	0.311047	2.36971e-07	5.29459e-07	134	P22792	CPN2	Carboxypeptidase N subunit 2	CPN2_HUMAN	1	24.0607	1.24061	Dengue	QC	NaN	NaN	NaN	77.8913	0.0657508
Dengue / QC	_EIGELYLPK_	P01011	-0.447964	0.447964	2.39826e-07	5.35206e-07	176	P01011	SERPINA3	Alpha-1-antichymotrypsin	AACT_HUMAN	1	-26.6923	0.733077	Dengue	QC	NaN	NaN	NaN	122.106	0.0754602
Dengue / QC	_SILFLGK_	P05543	-0.598546	0.598546	2.40896e-07	5.37383e-07	174	P05543	SERPINA7	Thyroxine-binding globulin	THBG_HUMAN	1	-33.9581	0.660419	Dengue	QC	NaN	NaN	NaN	51.9745	0.0954165
Dengue / QC	_ETTLGDMTGK_	P80108	0.512445	0.512445	2.4564e-07	5.47108e-07	58	P80108	GPLD1	Phosphatidylinositol-glycan-specific phospholipase D	PHLD_HUMAN	1	42.6465	1.42647	Dengue	QC	NaN	NaN	NaN	48.978	0.0809823
Dengue / QC	_SLHTLFGDK_	P02768	-0.396816	0.396816	2.46554e-07	5.48283e-07	176	P02768	ALB	Serum albumin	ALBU_HUMAN	1	-24.0467	0.759533	Dengue	QC	NaN	NaN	NaN	92.438	0.0720173
Dengue / QC	_SVQWC[Carbamidomethyl (C)]AVSQPEATK_	E7ER44;P02788	1.30903	1.30903	2.53113e-07	5.61332e-07	36	E7ER44;P02788	LTF	Lactotransferrin	E7ER44_HUMAN;TRFL_HUMAN	1	147.775	2.47775	Dengue	QC	NaN	NaN	NaN	27.4183	0.249354
Dengue / QC	_TTEYYPNGGLTR_	P08519	1.93165	1.93165	2.53415e-07	5.61784e-07	112	P08519	LPA	Apolipoprotein(a)	APOA_HUMAN	1	281.492	3.81492	Dengue	QC	NaN	NaN	NaN	94.2235	0.258967
Dengue / QC	_LLLLDLSHNSLLALEPGILDTANVEALR_	Q6EMK4	1.50389	1.50389	2.53778e-07	5.62368e-07	50	Q6EMK4	VASN	Vasorin	VASN_HUMAN	1	183.607	2.83607	Dengue	QC	NaN	NaN	NaN	17.5298	0.163143
Dengue / QC	_AIISNKDILATNGVIHYIDELLIPDSAK_	Q15582	1.5569	1.5569	2.57938e-07	5.71364e-07	40	Q15582	TGFBI	Transforming growth factor-beta-induced protein ig-h3	BGH3_HUMAN	1	194.221	2.94221	Dengue	QC	NaN	NaN	NaN	24.5892	0.228009
Dengue / QC	_TFPGFFSPMLGEFVSETESR_	P02671	1.96815	1.96815	2.58578e-07	5.72334e-07	174	P02671	FGA	Fibrinogen alpha chain	FIBA_HUMAN	1	291.266	3.91266	Dengue	QC	NaN	NaN	NaN	137.297	0.366981
Dengue / QC	_YFKPGM[Oxidation (M)]PFDLM[Oxidation (M)]VFVTNPDGSPAYR_	P01024	0.940544	0.940544	2.60715e-07	5.76392e-07	60	P01024	C3	Complement C3	CO3_HUMAN	1	91.9252	1.91925	Dengue	QC	NaN	NaN	NaN	22.9652	0.268116
Dengue / QC	_VLNYVDWIKKEMEEED_	B4DPQ0	0.758046	0.758046	2.62589e-07	5.80309e-07	84	B4DPQ0	C1R	Complement C1r subcomponent	B4DPQ0_HUMAN	1	69.1199	1.6912	Dengue	QC	NaN	NaN	NaN	26.0155	0.0909674
Dengue / QC	_ILGGHLDAKGSFPWQAK_	P00738	1.56494	1.56494	2.65656e-07	5.86469e-07	136	P00738	HP	Haptoglobin	HPT_HUMAN	1	195.866	2.95866	Dengue	QC	NaN	NaN	NaN	105.123	0.249491
Dengue / QC	_GTEAVAGILSEITAYSMPPVIK_	G3V2W1;Q9UK55	0.883205	0.883205	2.67956e-07	5.90791e-07	38	G3V2W1;Q9UK55	SERPINA10	Protein Z-dependent protease inhibitor	G3V2W1_HUMAN;ZPI_HUMAN	1	84.4468	1.84447	Dengue	QC	NaN	NaN	NaN	21.0169	0.119072
Dengue / QC	_WDEELAAFAK_	Q6UXB8	0.526269	0.526269	2.70186e-07	5.94785e-07	74	Q6UXB8	PI16	Peptidase inhibitor 16	PI16_HUMAN	1	44.02	1.4402	Dengue	QC	NaN	NaN	NaN	58.5243	0.100457
Dengue / QC	_LNRVNDAQEYR_	Q9UGM5	0.681405	0.681405	2.79522e-07	6.12964e-07	26	Q9UGM5	FETUB	Fetuin-B	FETUB_HUMAN	1	60.3701	1.6037	Dengue	QC	NaN	NaN	NaN	12.3282	0.137912
Dengue / QC	_ADGSPVKVGVETTKPSK_	A0M8Q6	1.78573	1.78573	2.8399e-07	6.22283e-07	46	A0M8Q6	IGLC7	Immunoglobulin lambda constant 7	IGLC7_HUMAN	1	244.792	3.44792	Dengue	QC	NaN	NaN	NaN	34.3308	0.284708
Dengue / QC	_AGC[Carbamidomethyl (C)]VAESTAVC[Carbamidomethyl (C)]R_	Q9Y6R7	1.00504	1.00504	2.84312e-07	6.22747e-07	86	Q9Y6R7	FCGBP	IgGFc-binding protein	FCGBP_HUMAN	1	100.7	2.007	Dengue	QC	NaN	NaN	NaN	53.0175	0.245831
Dengue / QC	_DASGVTFTWTPSSGKSAVQGPPER_	P01876	1.89699	1.89699	2.88835e-07	6.3168e-07	36	P01876	IGHA1	Immunoglobulin heavy constant alpha 1	IGHA1_HUMAN	1	272.436	3.72436	Dengue	QC	NaN	NaN	NaN	25.4486	0.306525
Dengue / QC	_NTLYLQM[Oxidation (M)]NSLR_	A0A0J9YVT0;P0DP02	-0.587227	0.587227	2.94568e-07	6.42981e-07	164	A0A0J9YVT0;P0DP02	IGHV3-33;IGHV3-30-3	Immunoglobulin heavy variable 3-33 (Fragment);Immunoglobulin heavy variable 3-30-3	A0A0J9YVT0_HUMAN;HVC33_HUMAN	1	-33.4379	0.665621	Dengue	QC	NaN	NaN	NaN	62.6934	0.103712
Dengue / QC	_TYLFKGSQYWR_	P04004	2.11175	2.11175	2.99884e-07	6.54083e-07	70	P04004	VTN	Vitronectin	VTNC_HUMAN	1	332.216	4.32216	Dengue	QC	NaN	NaN	NaN	59.3122	0.275171
Dengue / QC	_LM[Oxidation (M)]NIFLK_	P01024	0.542605	0.542605	3.11347e-07	6.77785e-07	118	P01024	C3	Complement C3	CO3_HUMAN	1	45.66	1.4566	Dengue	QC	NaN	NaN	NaN	96.2865	0.104015
Dengue / QC	_LYPIANGNNQSPVDIK_	P00915	1.02262	1.02262	3.12205e-07	6.79393e-07	48	P00915	CA1	Carbonic anhydrase 1	CAH1_HUMAN	1	103.161	2.03161	Dengue	QC	NaN	NaN	NaN	30.292	0.15786
Dengue / QC	_GHESC[Carbamidomethyl (C)]MGAVVSEYFVLTAAHC[Carbamidomethyl (C)]FTVDDKEHSIK_	B4E1Z4	0.57614	0.57614	3.15131e-07	6.84974e-07	90	B4E1Z4	NaN	cDNA FLJ55673, highly similar to Complement factor B (EC 3.4.21.47)	B4E1Z4_HUMAN	1	49.0855	1.49086	Dengue	QC	NaN	NaN	NaN	63.556	0.106168
Dengue / QC	_ALNSIIDVYHK_	P05109	2.34842	2.34842	3.18905e-07	6.92648e-07	16	P05109	S100A8	Protein S100-A8	S10A8_HUMAN	1	409.265	5.09265	Dengue	QC	NaN	NaN	NaN	10.1208	0.202874
Dengue / QC	_QFPFLASIQNQGR_	P20160	2.03295	2.03295	3.21197e-07	6.96825e-07	22	P20160	AZU1	Azurocidin	CAP7_HUMAN	1	309.242	4.09242	Dengue	QC	NaN	NaN	NaN	16.6257	0.274492
Dengue / QC	_GQELC[Carbamidomethyl (C)]ADYSENTFTEYKK_	P02774;P02774-3	0.595208	0.595208	3.27638e-07	7.09987e-07	36	P02774;P02774-3	GC	Vitamin D-binding protein;Isoform 3 of Vitamin D-binding protein	VTDB_HUMAN	1	51.069	1.51069	Dengue	QC	NaN	NaN	NaN	19.4981	0.0754559
Dengue / QC	_LVNGQSHISLSKAEFQDALEKLNM[Oxidation (M)]GITDLQGLR_	P0C0L5	0.781854	0.781854	3.27875e-07	7.10228e-07	132	P0C0L5	C4B	Complement C4-B	CO4B_HUMAN	1	71.9339	1.71934	Dengue	QC	NaN	NaN	NaN	73.9392	0.205987
Dengue / QC	_TTPPVLDSDGSFFLYSKLTVDK_	P01857	0.584016	0.584016	3.38904e-07	7.31333e-07	126	P01857	IGHG1	Immunoglobulin heavy constant gamma 1	IGHG1_HUMAN	1	49.9016	1.49902	Dengue	QC	NaN	NaN	NaN	118.199	0.104793
Dengue / QC	_PAGLPEKY_	P0DJI8	1.51615	1.51615	3.40532e-07	7.3401e-07	48	P0DJI8	SAA1	Serum amyloid A-1 protein	SAA1_HUMAN	1	186.027	2.86027	Dengue	QC	NaN	NaN	NaN	26.4495	0.228522
Dengue / QC	_IEDLPTMVTLGNSFLHK_	P04275	0.499464	0.499464	3.43907e-07	7.41003e-07	124	P04275	VWF	von Willebrand factor	VWF_HUMAN	1	41.3688	1.41369	Dengue	QC	NaN	NaN	NaN	116.641	0.111647
Dengue / QC	_DSPIQC[Carbamidomethyl (C)]IQAIAENR_	E7ER44;P02788	2.04524	2.04524	3.48017e-07	7.48652e-07	36	E7ER44;P02788	LTF	Lactotransferrin	E7ER44_HUMAN;TRFL_HUMAN	1	312.741	4.12741	Dengue	QC	NaN	NaN	NaN	22.1394	0.278499
Dengue / QC	_LM[Oxidation (M)]NIFLKDSITTWEILAVSMSDKK_	P01024	0.767982	0.767982	3.52753e-07	7.57767e-07	74	P01024	C3	Complement C3	CO3_HUMAN	1	70.2886	1.70289	Dengue	QC	NaN	NaN	NaN	52.9568	0.169805
Dengue / QC	_SQETGDLDVGGLQETDKIIEVEEEQEDPYLNDR_	P23142	1.18616	1.18616	3.688e-07	7.89254e-07	76	P23142	FBLN1	Fibulin-1	FBLN1_HUMAN	1	127.547	2.27547	Dengue	QC	NaN	NaN	NaN	49.105	0.164565
Dengue / QC	_DSDWPFC[Carbamidomethyl (C)]SDEDWNYK_	P02671	2.29403	2.29403	3.75107e-07	8.02148e-07	46	P02671	FGA	Fibrinogen alpha chain	FIBA_HUMAN	1	390.426	4.90426	Dengue	QC	NaN	NaN	NaN	29.4263	0.297148
Dengue / QC	_TQILVGVNKDEGTAFLVYGAPGFSK_	F8WF14;P06276	0.789136	0.789136	3.82092e-07	8.15857e-07	46	F8WF14;P06276	BCHE	Carboxylic ester hydrolase;Cholinesterase	F8WF14_HUMAN;CHLE_HUMAN	1	72.8039	1.72804	Dengue	QC	NaN	NaN	NaN	27.7903	0.20156
Dengue / QC	_TLADLTLLDSPIKVPLLLSEPINIIDALEM[Oxidation (M)]R_	P04114	0.678841	0.678841	3.82425e-07	8.16262e-07	110	P04114	APOB	Apolipoprotein B-100	APOB_HUMAN	1	60.0853	1.60085	Dengue	QC	NaN	NaN	NaN	23.5292	0.125797
Dengue / QC	_RPWNVASLIYETK_	P02748	-0.610463	0.610463	3.89826e-07	8.29876e-07	176	P02748	C9	Complement component C9	CO9_HUMAN	1	-34.5014	0.654986	Dengue	QC	NaN	NaN	NaN	50.4265	0.104091
Dengue / QC	_GEAFTLKATVLNYLPKC[Carbamidomethyl (C)]IR_	P01023	0.819625	0.819625	4.02355e-07	8.55588e-07	84	P01023	A2M	Alpha-2-macroglobulin	A2MG_HUMAN	1	76.4948	1.76495	Dengue	QC	NaN	NaN	NaN	69.9057	0.152615
Dengue / QC	_C[Carbamidomethyl (C)]VGWNGQC[Carbamidomethyl (C)]SGK_	P27918	0.794854	0.794854	4.05641e-07	8.62252e-07	94	P27918	CFP	Properdin	PROP_HUMAN	1	73.4902	1.7349	Dengue	QC	NaN	NaN	NaN	68.3726	0.178461
Dengue / QC	_IQEVAGSLIFR_	Q9HD89	1.57987	1.57987	4.12588e-07	8.75709e-07	20	Q9HD89	RETN	Resistin	RETN_HUMAN	1	198.943	2.98943	Dengue	QC	NaN	NaN	NaN	13.108	0.296241
Dengue / QC	_ANVFVQLPR_	P35858;P35858-2	0.778351	0.778351	4.12773e-07	8.75775e-07	38	P35858;P35858-2	IGFALS	Insulin-like growth factor-binding protein complex acid labile subunit;Isoform 2 of Insulin-like growth factor-binding protein complex acid labile subunit	ALS_HUMAN	1	71.5169	1.71517	Dengue	QC	NaN	NaN	NaN	30.3893	0.118627
Dengue / QC	_GVALHRPDVYLLPPAR_	P01871	-0.567242	0.567242	4.15492e-07	8.81215e-07	176	P01871	IGHM	Immunoglobulin heavy constant mu	IGHM_HUMAN	1	-32.5094	0.674906	Dengue	QC	NaN	NaN	NaN	49.5413	0.0979344
Dengue / QC	_MADEAGSEADHEGTHSTK_	P02671	1.38259	1.38259	4.21982e-07	8.9298e-07	162	P02671	FGA	Fibrinogen alpha chain	FIBA_HUMAN	1	160.736	2.60736	Dengue	QC	NaN	NaN	NaN	147.115	0.271293
Dengue / QC	_QALEEFQKEVSSC[Carbamidomethyl (C)]HC[Carbamidomethyl (C)]APC[Carbamidomethyl (C)]QGNGVPVLK_	P07358	0.521805	0.521805	4.26791e-07	9.02485e-07	36	P07358	C8B	Complement component C8 beta chain	CO8B_HUMAN	1	43.575	1.43575	Dengue	QC	NaN	NaN	NaN	22.9413	0.0996486
Dengue / QC	_TSNFNAAISLK_	P02748	-0.441037	0.441037	4.30773e-07	9.10228e-07	176	P02748	C9	Complement component C9	CO9_HUMAN	1	-26.3395	0.736605	Dengue	QC	NaN	NaN	NaN	82.7567	0.079544
Dengue / QC	_EPAAQAPVK_	A0A0A0MS09;P01880;P01880-2	1.99325	1.99325	4.34837e-07	9.18473e-07	20	A0A0A0MS09;P01880;P01880-2	IGHD	Immunoglobulin heavy constant delta (Fragment);Immunoglobulin heavy constant delta;Isoform 2 of Immunoglobulin heavy constant delta	A0A0A0MS09_HUMAN;IGHD_HUMAN;IGHD_HUMAN	1	298.132	3.98132	Dengue	QC	NaN	NaN	NaN	12.6304	0.257242
Dengue / QC	_SLALGTFAHTPALASLGLSNNR_	P35858;P35858-2	0.675457	0.675457	4.40834e-07	9.29758e-07	132	P35858;P35858-2	IGFALS	Insulin-like growth factor-binding protein complex acid labile subunit;Isoform 2 of Insulin-like growth factor-binding protein complex acid labile subunit	ALS_HUMAN	1	59.7102	1.5971	Dengue	QC	NaN	NaN	NaN	73.401	0.11165
Dengue / QC	_LRTEGDGVY[Sulfation (Y)]TLNDKK_	P00738	1.83911	1.83911	4.50552e-07	9.48145e-07	148	P00738	HP	Haptoglobin	HPT_HUMAN	1	257.789	3.57789	Dengue	QC	NaN	NaN	NaN	74.2786	0.582211
Dengue / QC	_C[Carbamidomethyl (C)]RGQSISVTSIRPC[Carbamidomethyl (C)]AAETQ_	P10643	0.959295	0.959295	4.50899e-07	9.48522e-07	116	P10643	C7	Complement component C7	CO7_HUMAN	1	94.4359	1.94436	Dengue	QC	NaN	NaN	NaN	98.5869	0.158244
Dengue / QC	_AFSDRNTLIIYLDKVSHSEDDC[Carbamidomethyl (C)]LAFK_	P01024	0.988275	0.988275	4.57214e-07	9.60386e-07	58	P01024	C3	Complement C3	CO3_HUMAN	1	98.3811	1.98381	Dengue	QC	NaN	NaN	NaN	24.4409	0.184823
Dengue / QC	_LAEGFPLPLLKR_	P18428	1.48171	1.48171	4.62e-07	9.69722e-07	16	P18428	LBP	Lipopolysaccharide-binding protein	LBP_HUMAN	1	179.279	2.79279	Dengue	QC	NaN	NaN	NaN	9.37802	0.170322
Dengue / QC	_TTPPMLDSDGSFFLYSKLTVDKSR_	P01859	2.34466	2.34466	4.77188e-07	1.00012e-06	40	P01859	IGHG2	Immunoglobulin heavy constant gamma 2	IGHG2_HUMAN	1	407.939	5.07939	Dengue	QC	NaN	NaN	NaN	26.0018	0.341806
Dengue / QC	_LTVGAAQVPAQLLVGALRVLAYSR_	P08571	1.14807	1.14807	4.79703e-07	1.00428e-06	46	P08571	CD14	Monocyte differentiation antigen CD14	CD14_HUMAN	1	121.617	2.21617	Dengue	QC	NaN	NaN	NaN	23.0234	0.149981
Dengue / QC	_SSGVPDRFSGSILGNK_	A0A075B6I0	-0.488591	0.488591	4.8612e-07	1.01622e-06	162	A0A075B6I0	IGLV8-61	Immunoglobulin lambda variable 8-61	LV861_HUMAN	1	-28.7279	0.712721	Dengue	QC	NaN	NaN	NaN	74.2351	0.0913304
Dengue / QC	_KC[Carbamidomethyl (C)]YFPYLENGYNQNHGRK_	Q5TFM2	2.44274	2.44274	4.87712e-07	1.01883e-06	28	Q5TFM2	CFH	Complement factor H	Q5TFM2_HUMAN	1	443.674	5.43674	Dengue	QC	NaN	NaN	NaN	18.9414	0.326207
Dengue / QC	_VSNKGLPAPIEK_	P01859	1.67776	1.67776	4.87991e-07	1.01901e-06	176	P01859	IGHG2	Immunoglobulin heavy constant gamma 2	IGHG2_HUMAN	1	219.93	3.1993	Dengue	QC	NaN	NaN	NaN	151.749	0.262027
Dengue / QC	_LALDNGGLAR_	Q14624	-0.391937	0.391937	5.03896e-07	1.04952e-06	176	Q14624	ITIH4	Inter-alpha-trypsin inhibitor heavy chain H4	ITIH4_HUMAN	1	-23.7894	0.762106	Dengue	QC	NaN	NaN	NaN	63.7597	0.0670098
Dengue / QC	_GLASANVDFAFSLYKHLVALSPKK_	P08185	0.617878	0.617878	5.05975e-07	1.05308e-06	132	P08185	SERPINA6	Corticosteroid-binding globulin	CBG_HUMAN	1	53.4617	1.53462	Dengue	QC	NaN	NaN	NaN	61.8046	0.114798
Dengue / QC	_DIFTGLIGPM[Oxidation (M)]K_	P00450	1.08446	1.08446	5.05815e-07	1.05308e-06	34	P00450	CP	Ceruloplasmin	CERU_HUMAN	1	112.059	2.12059	Dengue	QC	NaN	NaN	NaN	18.0044	0.175745
Dengue / QC	_GQC[Carbamidomethyl (C)]LITQSPPYYR_	Q14520;Q14520-2	0.45974	0.45974	5.08018e-07	1.05694e-06	170	Q14520;Q14520-2	HABP2	Hyaluronan-binding protein 2;Isoform 2 of Hyaluronan-binding protein 2	HABP2_HUMAN	1	37.5294	1.37529	Dengue	QC	NaN	NaN	NaN	115.482	0.0892297
Dengue / QC	_VGSQYRLEDSVTYHC[Carbamidomethyl (C)]SR_	B4E1Z4	1.4588	1.4588	5.08841e-07	1.05827e-06	138	B4E1Z4	NaN	cDNA FLJ55673, highly similar to Complement factor B (EC 3.4.21.47)	B4E1Z4_HUMAN	1	174.88	2.7488	Dengue	QC	NaN	NaN	NaN	118.029	0.236463
Dengue / QC	_AFWLDVSHNRLEALPNSLLAPLGR_	P35858;P35858-2	1.23702	1.23702	5.10346e-07	1.06101e-06	46	P35858;P35858-2	IGFALS	Insulin-like growth factor-binding protein complex acid labile subunit;Isoform 2 of Insulin-like growth factor-binding protein complex acid labile subunit	ALS_HUMAN	1	135.712	2.35712	Dengue	QC	NaN	NaN	NaN	34.2634	0.143073
Dengue / QC	_FSGQLNSHGC[Carbamidomethyl (C)]FYQQVKTKVFQLK_	P01023	1.53075	1.53075	5.15518e-07	1.0702e-06	46	P01023	A2M	Alpha-2-macroglobulin	A2MG_HUMAN	1	188.936	2.88936	Dengue	QC	NaN	NaN	NaN	26.5813	0.183094
Dengue / QC	_QTAC[Carbamidomethyl (C)]KPEIAYAYK_	P01031	0.481604	0.481604	5.1581e-07	1.07041e-06	38	P01031	C5	Complement C5	CO5_HUMAN	1	39.6295	1.3963	Dengue	QC	NaN	NaN	NaN	20.6962	0.12737
Dengue / QC	_YYWGGQYTWDMAK_	P02675	3.00291	3.00291	5.21094e-07	1.08059e-06	102	P02675	FGB	Fibrinogen beta chain	FIBB_HUMAN	1	701.615	8.01615	Dengue	QC	NaN	NaN	NaN	73.7262	0.43924
Dengue / QC	_NSADNKVVC[Carbamidomethyl (C)]SC[Carbamidomethyl (C)]TEGYR_	P00740	0.69395	0.69395	5.2216e-07	1.08241e-06	98	P00740	F9	Coagulation factor IX	FA9_HUMAN	1	61.7707	1.61771	Dengue	QC	NaN	NaN	NaN	89.7307	0.125155
Dengue / QC	_GVPIPNKVIFIR_	P01023	-0.485992	0.485992	5.31174e-07	1.09909e-06	174	P01023	A2M	Alpha-2-macroglobulin	A2MG_HUMAN	1	-28.5994	0.714006	Dengue	QC	NaN	NaN	NaN	115.245	0.0774955
Dengue / QC	_NSITLTNLTPGTEYVVSIVALNGR_	P02751;P02751-15;P02751-3;P02751-7	1.51255	1.51255	5.32836e-07	1.10172e-06	58	P02751;P02751-15;P02751-3;P02751-7	FN1	Fibronectin;Isoform 15 of Fibronectin;Isoform 3 of Fibronectin;Isoform 7 of Fibronectin	FINC_HUMAN	1	185.314	2.85314	Dengue	QC	NaN	NaN	NaN	22.1424	0.202531
Dengue / QC	_IIGGSDADIK_	P09871	0.375379	0.375379	5.49403e-07	1.13309e-06	46	P09871	C1S	Complement C1s subcomponent	C1S_HUMAN	1	29.718	1.29718	Dengue	QC	NaN	NaN	NaN	39.3462	0.0912901
Dengue / QC	_LLIYDASSLESGVPSR_	A0A0B4J2D9;P0DP09	-0.731176	0.731176	5.51219e-07	1.13571e-06	144	A0A0B4J2D9;P0DP09	IGKV1D-13;IGKV1-13	Immunoglobulin kappa variable 1D-13;Immunoglobulin kappa variable 1-13	KVD13_HUMAN;KV113_HUMAN	1	-39.7588	0.602412	Dengue	QC	NaN	NaN	NaN	130.14	0.139597
Dengue / QC	_EAC[Carbamidomethyl (C)]NAWLQKR_	Q9NZP8	1.77571	1.77571	5.52725e-07	1.13829e-06	42	Q9NZP8	C1RL	Complement C1r subcomponent-like protein	C1RL_HUMAN	1	242.406	3.42406	Dengue	QC	NaN	NaN	NaN	22.0628	0.478459
Dengue / QC	_FSGVPDRFSGSGSGTDFTLK_	A0A075B6S2;A2NJV5	0.646767	0.646767	5.56421e-07	1.14494e-06	152	A0A075B6S2;A2NJV5	IGKV2D-29;IGKV2-29	Immunoglobulin kappa variable 2D-29;Immunoglobulin kappa variable 2-29	KVD29_HUMAN;KV229_HUMAN	1	56.5656	1.56566	Dengue	QC	NaN	NaN	NaN	137.683	0.10992
Dengue / QC	_KNPREDYLDVYVFGVGPLVNQVNINALASK_	B4E1Z4	0.62102	0.62102	5.56558e-07	1.14494e-06	130	B4E1Z4	NaN	cDNA FLJ55673, highly similar to Complement factor B (EC 3.4.21.47)	B4E1Z4_HUMAN	1	53.7962	1.53796	Dengue	QC	NaN	NaN	NaN	89.9533	0.103059
Dengue / QC	_GISEQSLVVSGVQHQSTLELSEVGVEAAAATSIAMSR_	P08697	0.851288	0.851288	5.56975e-07	1.14539e-06	64	P08697	SERPINF2	Alpha-2-antiplasmin	A2AP_HUMAN	1	80.4111	1.80411	Dengue	QC	NaN	NaN	NaN	27.3724	0.126422
Dengue / QC	_SVMAPFTMTIDAHTNGNGK_	P04114	0.765552	0.765552	5.5725e-07	1.14554e-06	16	P04114	APOB	Apolipoprotein B-100	APOB_HUMAN	1	70.0021	1.70002	Dengue	QC	NaN	NaN	NaN	9.45294	0.0727818
Dengue / QC	_VPQVSTPTLVEVSRNLGK_	P02768	3.15164	3.15164	5.61962e-07	1.15397e-06	86	P02768	ALB	Serum albumin	ALBU_HUMAN	1	788.666	8.88666	Dengue	QC	NaN	NaN	NaN	59.5794	0.533252
Dengue / QC	_GFPIKEDFLEQSEQLFGAKPVSLTGK_	P08697	0.379711	0.379711	5.63266e-07	1.15561e-06	130	P08697	SERPINF2	Alpha-2-antiplasmin	A2AP_HUMAN	1	30.1081	1.30108	Dengue	QC	NaN	NaN	NaN	100.824	0.0866324
Dengue / QC	_C[Carbamidomethyl (C)]PPPPLPINSK_	P05160	0.476193	0.476193	5.65846e-07	1.15944e-06	72	P05160	F13B	Coagulation factor XIII B chain	F13B_HUMAN	1	39.1068	1.39107	Dengue	QC	NaN	NaN	NaN	50.8029	0.125099
Dengue / QC	_MVETTAYALLTSLNLK_	P01031	0.563712	0.563712	5.85056e-07	1.19707e-06	98	P01031	C5	Complement C5	CO5_HUMAN	1	47.8067	1.47807	Dengue	QC	NaN	NaN	NaN	55.2751	0.154247
Dengue / QC	_GLEWVGR_	A0A0B4J1Y9	-0.39462	0.39462	5.8654e-07	1.19967e-06	176	A0A0B4J1Y9	IGHV3-72	Immunoglobulin heavy variable 3-72	HV372_HUMAN	1	-23.931	0.76069	Dengue	QC	NaN	NaN	NaN	70.7766	0.0763459
Dengue / QC	_VVSVDENFRPR_	P20742	2.83675	2.83675	5.92096e-07	1.2093e-06	74	P20742	PZP	Pregnancy zone protein	PZP_HUMAN	1	614.41	7.1441	Dengue	QC	NaN	NaN	NaN	49.4875	0.449826
Dengue / QC	_C[Carbamidomethyl (C)]C[Carbamidomethyl (C)]EDGMR_	P01024	0.669952	0.669952	5.93266e-07	1.21113e-06	148	P01024	C3	Complement C3	CO3_HUMAN	1	59.102	1.59102	Dengue	QC	NaN	NaN	NaN	47.7766	0.113497
Dengue / QC	_VFREFHLHLRLPMSVR_	P0C0L5	0.770315	0.770315	6.00015e-07	1.22371e-06	100	P0C0L5	C4B	Complement C4-B	CO4B_HUMAN	1	70.5642	1.70564	Dengue	QC	NaN	NaN	NaN	79.7128	0.137545
Dengue / QC	_LC[Carbamidomethyl (C)]NSPSPQMNGKPC[Carbamidomethyl (C)]EGEAR_	P07996	0.940849	0.940849	6.00538e-07	1.22434e-06	38	P07996	THBS1	Thrombospondin-1	TSP1_HUMAN	1	91.9658	1.91966	Dengue	QC	NaN	NaN	NaN	22.3673	0.129927
Dengue / QC	_VPQVSTPTLVEVSRNLGKVGSK_	P02768	2.19139	2.19139	6.17875e-07	1.25743e-06	44	P02768	ALB	Serum albumin	ALBU_HUMAN	1	356.746	4.56746	Dengue	QC	NaN	NaN	NaN	29.1456	0.295622
Dengue / QC	_YRGDQDATMSILDISM[Oxidation (M)]M[Oxidation (M)]TGFAPDTDDLK_	P01024	0.114375	0.114375	6.2071e-07	1.26184e-06	28	P01024	C3	Complement C3	CO3_HUMAN	1	8.2506	1.08251	Dengue	QC	NaN	NaN	NaN	12.948	0.412245
Dengue / QC	_FKDLGEENFKALVLIAFAQYLQQC[Carbamidomethyl (C)]PFEDHVK_	P02768	0.650548	0.650548	6.22759e-07	1.26556e-06	176	P02768	ALB	Serum albumin	ALBU_HUMAN	1	56.9764	1.56976	Dengue	QC	NaN	NaN	NaN	124.941	0.0965304
Dengue / QC	_YASQSFSGVPSR_	A0A0C4DH24	-0.757688	0.757688	6.26349e-07	1.27194e-06	140	A0A0C4DH24	IGKV6-21	Immunoglobulin kappa variable 6-21	KV621_HUMAN	1	-40.8557	0.591443	Dengue	QC	NaN	NaN	NaN	98.0963	0.136431
Dengue / QC	_YIETDPANRDRR_	P06396	1.94895	1.94895	6.28307e-07	1.27543e-06	34	P06396	GSN	Gelsolin	GELS_HUMAN	1	286.093	3.86093	Dengue	QC	NaN	NaN	NaN	25.098	0.282195
Dengue / QC	_C[Carbamidomethyl (C)]QAYESNR_	P43652	1.12683	1.12683	6.28995e-07	1.27595e-06	42	P43652	AFM	Afamin	AFAM_HUMAN	1	118.378	2.18378	Dengue	QC	NaN	NaN	NaN	30.622	0.128604
Dengue / QC	_SGLSTGWTQLSK_	P04217	-0.431142	0.431142	6.29615e-07	1.27675e-06	176	P04217	A1BG	Alpha-1B-glycoprotein	A1BG_HUMAN	1	-25.8326	0.741674	Dengue	QC	NaN	NaN	NaN	50.3888	0.0736243
Dengue / QC	_FQVDNNNRLLLQQVSLPELPGEYSM[Oxidation (M)]K_	P01023	0.974042	0.974042	6.32305e-07	1.28129e-06	30	P01023	A2M	Alpha-2-macroglobulin	A2MG_HUMAN	1	96.4337	1.96434	Dengue	QC	NaN	NaN	NaN	12.1346	0.693374
Dengue / QC	_GIVEEC[Carbamidomethyl (C)]C[Carbamidomethyl (C)]FR_	P01344-2	0.344813	0.344813	6.60617e-07	1.33296e-06	152	P01344-2	IGF2	Isoform 2 of Insulin-like growth factor II	IGF2_HUMAN	1	26.9986	1.26999	Dengue	QC	NaN	NaN	NaN	98.3895	0.0651912
Dengue / QC	_PALPAGTEDTAKEDAANR_	P06396	0.409683	0.409683	6.62638e-07	1.33656e-06	74	P06396	GSN	Gelsolin	GELS_HUMAN	1	32.8394	1.32839	Dengue	QC	NaN	NaN	NaN	43.0624	0.0881247
Dengue / QC	_FPKAEFAEVSKLVTDLTK_	P02768	1.08396	1.08396	6.64168e-07	1.3387e-06	150	P02768	ALB	Serum albumin	ALBU_HUMAN	1	111.984	2.11984	Dengue	QC	NaN	NaN	NaN	127.864	0.19651
Dengue / QC	_GRYEFHSLNIHSC[Carbamidomethyl (C)]ELLHSALRPVPGQGLSLSISDSSIR_	P18428	1.11897	1.11897	6.83544e-07	1.37385e-06	40	P18428	LBP	Lipopolysaccharide-binding protein	LBP_HUMAN	1	117.192	2.17192	Dengue	QC	NaN	NaN	NaN	24.1697	0.181076
Dengue / QC	_DKGQAGLQR_	P0C0L5	0.86186	0.86186	6.94884e-07	1.39468e-06	96	P0C0L5	C4B	Complement C4-B	CO4B_HUMAN	1	81.738	1.81738	Dengue	QC	NaN	NaN	NaN	82.3616	0.172581
Dengue / QC	_ELPQSIVYK_	Q12805;Q12805-2;Q12805-4	0.871741	0.871741	6.97169e-07	1.39873e-06	110	Q12805;Q12805-2;Q12805-4	EFEMP1	EGF-containing fibulin-like extracellular matrix protein 1;Isoform 2 of EGF-containing fibulin-like extracellular matrix protein 1;Isoform 4 of EGF-containing fibulin-like extracellular matrix protein 1	FBLN3_HUMAN	1	82.987	1.82987	Dengue	QC	NaN	NaN	NaN	104.548	0.177393
Dengue / QC	_GQPLSPEK_	P01871	-0.598483	0.598483	7.0448e-07	1.41194e-06	174	P01871	IGHM	Immunoglobulin heavy constant mu	IGHM_HUMAN	1	-33.9552	0.660448	Dengue	QC	NaN	NaN	NaN	59.4375	0.109456
Dengue / QC	_KVLLDGVQNPRAEDLVGK_	P01024	0.984313	0.984313	7.12135e-07	1.42527e-06	126	P01024	C3	Complement C3	CO3_HUMAN	1	97.8371	1.97837	Dengue	QC	NaN	NaN	NaN	111.897	0.16306
Dengue / QC	_TNTNVNC[Carbamidomethyl (C)]PIEC[Carbamidomethyl (C)]FMPLDVQADREDSRE_	P02751;P02751-15;P02751-3;P02751-7	0.812886	0.812886	7.26346e-07	1.45065e-06	134	P02751;P02751-15;P02751-3;P02751-7	FN1	Fibronectin;Isoform 15 of Fibronectin;Isoform 3 of Fibronectin;Isoform 7 of Fibronectin	FINC_HUMAN	1	75.6722	1.75672	Dengue	QC	NaN	NaN	NaN	124.743	0.141812
Dengue / QC	_ALYYDLISSPDIHGTYKELLDTVTAPQK_	P36955	0.990564	0.990564	7.31059e-07	1.45904e-06	150	P36955	SERPINF1	Pigment epithelium-derived factor	PEDF_HUMAN	1	98.6961	1.98696	Dengue	QC	NaN	NaN	NaN	89.5419	0.157261
Dengue / QC	_VTISVDK_	A0A075B6R2	0.739158	0.739158	7.33553e-07	1.4635e-06	76	A0A075B6R2	IGHV4-4	Immunoglobulin heavy variable 4-4	HV404_HUMAN	1	66.9202	1.6692	Dengue	QC	NaN	NaN	NaN	45.1641	0.12826
Dengue / QC	_C[Carbamidomethyl (C)]VPVC[Carbamidomethyl (C)]GVPREPFEEKQR_	P09871	1.37202	1.37202	7.37188e-07	1.46972e-06	120	P09871	C1S	Complement C1s subcomponent	C1S_HUMAN	1	158.833	2.58833	Dengue	QC	NaN	NaN	NaN	100.877	0.192374
Dengue / QC	_GQPREPQVYTLPPSQEEMTKNQVSLTC[Carbamidomethyl (C)]LVK_	P01861	1.52015	1.52015	7.38032e-07	1.47089e-06	60	P01861	IGHG4	Immunoglobulin heavy constant gamma 4	IGHG4_HUMAN	1	186.822	2.86822	Dengue	QC	NaN	NaN	NaN	44.5781	0.273349
Dengue / QC	_NYC[Carbamidomethyl (C)]RNPDGDVGGPWC[Carbamidomethyl (C)]YTTNPR_	P00747	1.02602	1.02602	7.57594e-07	1.50302e-06	140	P00747	PLG	Plasminogen	PLMN_HUMAN	1	103.64	2.0364	Dengue	QC	NaN	NaN	NaN	131.785	0.18478
Dengue / QC	_FSC[Carbamidomethyl (C)]FQEEAPQPHYQLR_	Q16610	0.981399	0.981399	7.61661e-07	1.51004e-06	164	Q16610	ECM1	Extracellular matrix protein 1	ECM1_HUMAN	1	97.4379	1.97438	Dengue	QC	NaN	NaN	NaN	142.549	0.153236
Dengue / QC	_EEM[Oxidation (M)]TKNQVSLTC[Carbamidomethyl (C)]LVK_	P01860	1.78132	1.78132	7.70353e-07	1.52568e-06	118	P01860	IGHG3	Immunoglobulin heavy constant gamma 3	IGHG3_HUMAN	1	243.741	3.43741	Dengue	QC	NaN	NaN	NaN	99.0806	0.295741
Dengue / QC	_SVLRPSQFGGQPC[Carbamidomethyl (C)]TAPLVAFQPC[Carbamidomethyl (C)]IPSKLC[Carbamidomethyl (C)]K_	P13671	1.30029	1.30029	7.76523e-07	1.53682e-06	86	P13671	C6	Complement component C6	CO6_HUMAN	1	146.279	2.46279	Dengue	QC	NaN	NaN	NaN	64.1156	0.225601
Dengue / QC	_NTLELSNGVIVK_	P04114	0.531505	0.531505	7.80744e-07	1.5441e-06	108	P04114	APOB	Apolipoprotein B-100	APOB_HUMAN	1	44.5436	1.44544	Dengue	QC	NaN	NaN	NaN	91.4887	0.110771
Dengue / QC	_NALTGLPPGLFQASATLDTLVLK_	P02750	0.428395	0.428395	7.85321e-07	1.55261e-06	120	P02750	LRG1	Leucine-rich alpha-2-glycoprotein	A2GL_HUMAN	1	34.5735	1.34574	Dengue	QC	NaN	NaN	NaN	92.7387	0.106754
Dengue / QC	_EHAVEGDC[Carbamidomethyl (C)]DFQLLKLDGK_	P02765	0.767556	0.767556	7.8605e-07	1.55352e-06	176	P02765	AHSG	Alpha-2-HS-glycoprotein	FETUA_HUMAN	1	70.2383	1.70238	Dengue	QC	NaN	NaN	NaN	167.119	0.13248
Dengue / QC	_STGSWSTLKTQDQK_	B4E1Z4	1.8097	1.8097	7.94875e-07	1.57041e-06	148	B4E1Z4	NaN	cDNA FLJ55673, highly similar to Complement factor B (EC 3.4.21.47)	B4E1Z4_HUMAN	1	250.569	3.50569	Dengue	QC	NaN	NaN	NaN	122.524	0.311068
Dengue / QC	_IYPTVNC[Carbamidomethyl (C)]QPLGMISLMK_	P01042	0.547204	0.547204	7.95782e-07	1.57166e-06	168	P01042	KNG1	Kininogen-1	KNG1_HUMAN	1	46.1251	1.46125	Dengue	QC	NaN	NaN	NaN	64.5363	0.0861833
Dengue / QC	_EEMTKNQVSLTC[Carbamidomethyl (C)]LVK_	P01860	0.744241	0.744241	8.03158e-07	1.58512e-06	172	P01860	IGHG3	Immunoglobulin heavy constant gamma 3	IGHG3_HUMAN	1	67.5092	1.67509	Dengue	QC	NaN	NaN	NaN	142.645	0.123406
Dengue / QC	_AIAANEADAVTLDAGLVYDAYLAPNNLKPVVAEFYGSK_	P02787	0.386837	0.386837	8.07904e-07	1.59394e-06	172	P02787	TF	Serotransferrin	TRFE_HUMAN	1	30.7524	1.30752	Dengue	QC	NaN	NaN	NaN	79.5964	0.0920416
Dengue / QC	_FGNADGAAC[Carbamidomethyl (C)]HFPFIFEGR_	P14780	2.0401	2.0401	8.10452e-07	1.59841e-06	26	P14780	MMP9	Matrix metalloproteinase-9	MMP9_HUMAN	1	311.274	4.11274	Dengue	QC	NaN	NaN	NaN	17.0954	0.290051
Dengue / QC	_SSVAAMHWMDGSVVTR_	P22891;P22891-2	0.797956	0.797956	8.25836e-07	1.62593e-06	60	P22891;P22891-2	PROZ	Vitamin K-dependent protein Z;Isoform 2 of Vitamin K-dependent protein Z	PROZ_HUMAN	1	73.8636	1.73864	Dengue	QC	NaN	NaN	NaN	15.4834	0.119632
Dengue / QC	_YNPIPSVQLMGNGFHFLAGEPR_	P13671	0.864713	0.864713	8.35267e-07	1.64336e-06	64	P13671	C6	Complement component C6	CO6_HUMAN	1	82.0978	1.82098	Dengue	QC	NaN	NaN	NaN	30.4824	0.105557
Dengue / QC	_NADLQVLKPEPELVYEDLR_	P01833	1.69584	1.69584	8.36792e-07	1.64579e-06	60	P01833	PIGR	Polymeric immunoglobulin receptor	PIGR_HUMAN	1	223.966	3.23966	Dengue	QC	NaN	NaN	NaN	41.643	0.330071
Dengue / QC	_LMIYEVSK_	P01709	-0.674275	0.674275	8.37992e-07	1.64758e-06	174	P01709	IGLV2-8	Immunoglobulin lambda variable 2-8	LV208_HUMAN	1	-37.3353	0.626647	Dengue	QC	NaN	NaN	NaN	98.2017	0.119815
Dengue / QC	_GADFQC[Carbamidomethyl (C)]FQQAR_	H7BXV5;H7C457;P39060;P39060-1;P39060-2	1.76906	1.76906	8.4129e-07	1.65349e-06	26	H7BXV5;H7C457;P39060;P39060-1;P39060-2	COL18A1	Collagen alpha-1(XVIII) chain (Fragment);Collagen alpha-1(XVIII) chain (Fragment);Collagen alpha-1(XVIII) chain;Isoform 2 of Collagen alpha-1(XVIII) chain;Isoform 3 of Collagen alpha-1(XVIII) chain	H7BXV5_HUMAN;H7C457_HUMAN;COIA1_HUMAN;COIA1_HUMAN;COIA1_HUMAN	1	240.831	3.40831	Dengue	QC	NaN	NaN	NaN	13.3325	0.238441
Dengue / QC	_EELATFDPVDNIVFNMAAGSAPMQLHLR_	O95445	0.684337	0.684337	8.54108e-07	1.67636e-06	36	O95445	APOM	Apolipoprotein M	APOM_HUMAN	1	60.6964	1.60696	Dengue	QC	NaN	NaN	NaN	22.5683	0.127713
Dengue / QC	_ASTPNGYDNGIIWATWK_	P02679	1.47769	1.47769	8.61005e-07	1.68815e-06	46	P02679	FGG	Fibrinogen gamma chain	FIBG_HUMAN	1	178.503	2.78503	Dengue	QC	NaN	NaN	NaN	39.2054	0.194888
Dengue / QC	_NPDAVAAPYC[Carbamidomethyl (C)]YTRDPGVR_	P08519	2.49992	2.49992	8.66052e-07	1.69688e-06	20	P08519	LPA	Apolipoprotein(a)	APOA_HUMAN	1	465.653	5.65653	Dengue	QC	NaN	NaN	NaN	14.0541	0.271963
Dengue / QC	_MDDAVAPGR_	A0A0A0MRJ7;P12259	0.396455	0.396455	8.78463e-07	1.71823e-06	72	A0A0A0MRJ7;P12259	F5	Coagulation factor V	A0A0A0MRJ7_HUMAN;FA5_HUMAN	1	31.6269	1.31627	Dengue	QC	NaN	NaN	NaN	59.7065	0.0926003
Dengue / QC	_VTISVDTSK_	P06331	-0.610609	0.610609	8.83421e-07	1.72734e-06	174	P06331	IGHV4-34	Immunoglobulin heavy variable 4-34	HV434_HUMAN	1	-34.508	0.65492	Dengue	QC	NaN	NaN	NaN	57.193	0.114497
Dengue / QC	_GADVWFK_	P05109	1.88212	1.88212	8.92748e-07	1.74317e-06	40	P05109	S100A8	Protein S100-A8	S10A8_HUMAN	1	268.615	3.68615	Dengue	QC	NaN	NaN	NaN	19.127	0.23845
Dengue / QC	_YDVENC[Carbamidomethyl (C)]LANK_	P01023	-0.413507	0.413507	8.95886e-07	1.7487e-06	170	P01023	A2M	Alpha-2-macroglobulin	A2MG_HUMAN	1	-24.9204	0.750796	Dengue	QC	NaN	NaN	NaN	119.786	0.0787392
Dengue / QC	_DGFDISGNPWIC[Carbamidomethyl (C)]DQNLSDLYR_	P02750	0.456724	0.456724	9.12922e-07	1.77951e-06	130	P02750	LRG1	Leucine-rich alpha-2-glycoprotein	A2GL_HUMAN	1	37.2422	1.37242	Dengue	QC	NaN	NaN	NaN	89.97	0.108874
Dengue / QC	_GLLSGWAR_	P22891;P22891-2	0.453726	0.453726	9.14553e-07	1.78208e-06	162	P22891;P22891-2	PROZ	Vitamin K-dependent protein Z;Isoform 2 of Vitamin K-dependent protein Z	PROZ_HUMAN	1	36.9573	1.36957	Dengue	QC	NaN	NaN	NaN	58.8091	0.107655
Dengue / QC	_VTVSC[Carbamidomethyl (C)]SGGMSLEGPSAFLC[Carbamidomethyl (C)]GSSLK_	P10643	0.530383	0.530383	9.19533e-07	1.78994e-06	130	P10643	C7	Complement component C7	CO7_HUMAN	1	44.4313	1.44431	Dengue	QC	NaN	NaN	NaN	114.915	0.121874
Dengue / QC	_HQM[Oxidation (M)]DLVATLSQLGLQELFQAPDLR_	P08697	0.714295	0.714295	9.25873e-07	1.80119e-06	140	P08697	SERPINF2	Alpha-2-antiplasmin	A2AP_HUMAN	1	64.0681	1.64068	Dengue	QC	NaN	NaN	NaN	108.033	0.105508
Dengue / QC	_FFSLLSGSLNSHGLELNADILGTDKINSGAHK_	P04114	0.60858	0.60858	9.46535e-07	1.83935e-06	78	P04114	APOB	Apolipoprotein B-100	APOB_HUMAN	1	52.4758	1.52476	Dengue	QC	NaN	NaN	NaN	49.498	0.135992
Dengue / QC	_KVADALTNAVAHVDDMPNALSALSDLHAHK_	P69905	0.606851	0.606851	9.61618e-07	1.86547e-06	122	P69905	HBA1	Hemoglobin subunit alpha	HBA_HUMAN	1	52.2931	1.52293	Dengue	QC	NaN	NaN	NaN	92.7883	0.0676835
Dengue / QC	_EPAHLMSLFGGKPMIIYKGGTSR_	P06396	0.625857	0.625857	9.62712e-07	1.86696e-06	90	P06396	GSN	Gelsolin	GELS_HUMAN	1	54.3127	1.54313	Dengue	QC	NaN	NaN	NaN	55.0444	0.146887
Dengue / QC	_ILDELLQTC[Carbamidomethyl (C)]VDPEDC[Carbamidomethyl (C)]PVC[Carbamidomethyl (C)]EVAGR_	P04275	2.17525	2.17525	9.6595e-07	1.8726e-06	34	P04275	VWF	von Willebrand factor	VWF_HUMAN	1	351.663	4.51663	Dengue	QC	NaN	NaN	NaN	21.674	0.260799
Dengue / QC	_VVWC[Carbamidomethyl (C)]AVGEQELRK_	E7ER44;P02788	1.95862	1.95862	9.66868e-07	1.87374e-06	30	E7ER44;P02788	LTF	Lactotransferrin	E7ER44_HUMAN;TRFL_HUMAN	1	288.689	3.88689	Dengue	QC	NaN	NaN	NaN	22.963	0.259732
Dengue / QC	_QRAAC[Carbamidomethyl (C)]AQLNDFLQEYGTQGC[Carbamidomethyl (C)]QV_	P0C0L5	1.82203	1.82203	9.67884e-07	1.87443e-06	40	P0C0L5	C4B	Complement C4-B	CO4B_HUMAN	1	253.579	3.53579	Dengue	QC	NaN	NaN	NaN	29.5706	0.282207
Dengue / QC	_TSC[Carbamidomethyl (C)]LLFMGR_	P05546	0.41271	0.41271	9.74532e-07	1.88538e-06	132	P05546	SERPIND1	Heparin cofactor 2	HEP2_HUMAN	1	33.1184	1.33118	Dengue	QC	NaN	NaN	NaN	88.4881	0.0907662
Dengue / QC	_SRWQQGNIFSC[Carbamidomethyl (C)]SVMHEALHNRFTQK_	P01860	1.65817	1.65817	9.87568e-07	1.90735e-06	70	P01860	IGHG3	Immunoglobulin heavy constant gamma 3	IGHG3_HUMAN	1	215.616	3.15616	Dengue	QC	NaN	NaN	NaN	43.7302	0.242485
Dengue / QC	_LLIYDASNLETGVPSR_	P01593;P01594	-0.75339	0.75339	9.94851e-07	1.92077e-06	176	P01593;P01594	IGKV1D-33;IGKV1-33	Immunoglobulin kappa variable 1D-33;Immunoglobulin kappa variable 1-33	KVD33_HUMAN;KV133_HUMAN	1	-40.6792	0.593208	Dengue	QC	NaN	NaN	NaN	58.7011	0.124403
Dengue / QC	_IDITLSSVK_	Q08380	1.10649	1.10649	9.98982e-07	1.92809e-06	58	Q08380	LGALS3BP	Galectin-3-binding protein	LG3BP_HUMAN	1	115.321	2.15321	Dengue	QC	NaN	NaN	NaN	39.6322	0.203936
Dengue / QC	_C[Carbamidomethyl (C)]QFFTYSLLPEDC[Carbamidomethyl (C)]KEEK_	H0YAC1;P03952	0.586092	0.586092	1.00627e-06	1.93951e-06	146	H0YAC1;P03952	KLKB1	Plasma kallikrein (Fragment);Plasma kallikrein	H0YAC1_HUMAN;KLKB1_HUMAN	1	50.1175	1.50117	Dengue	QC	NaN	NaN	NaN	94.9937	0.0822134
Dengue / QC	_QKVEPLR_	P02647	0.603485	0.603485	1.0216e-06	1.96707e-06	120	P02647	APOA1	Apolipoprotein A-I	APOA1_HUMAN	1	51.9383	1.51938	Dengue	QC	NaN	NaN	NaN	46.5169	0.133477
Dengue / QC	_FKDTYFVTGIVSWGEGC[Carbamidomethyl (C)]AR_	P00742	1.52236	1.52236	1.02701e-06	1.97614e-06	68	P00742	F10	Coagulation factor X	FA10_HUMAN	1	187.26	2.8726	Dengue	QC	NaN	NaN	NaN	24.3848	0.206088
Dengue / QC	_FPETLMEIEIPIVDHSTC[Carbamidomethyl (C)]QK_	P48740	1.01627	1.01627	1.03249e-06	1.98601e-06	32	P48740	MASP1	Mannan-binding lectin serine protease 1	MASP1_HUMAN	1	102.268	2.02268	Dengue	QC	NaN	NaN	NaN	21.3061	0.161203
Dengue / QC	_GMC[Carbamidomethyl (C)]TSPPLIK_	P05160	0.486144	0.486144	1.04053e-06	1.99946e-06	152	P05160	F13B	Coagulation factor XIII B chain	F13B_HUMAN	1	40.0696	1.4007	Dengue	QC	NaN	NaN	NaN	93.6245	0.0786505
Dengue / QC	_SLTLGIEPVSPTSLR_	Q6EMK4	0.468212	0.468212	1.04424e-06	2.00521e-06	122	Q6EMK4	VASN	Vasorin	VASN_HUMAN	1	38.3394	1.38339	Dengue	QC	NaN	NaN	NaN	104.081	0.0942169
Dengue / QC	_AVVFLEPQWYSVLEKDSVTLK_	A0A087WZR4	1.7571	1.7571	1.05718e-06	2.02871e-06	38	A0A087WZR4	FCGR3B	Low affinity immunoglobulin gamma Fc region receptor III-B	A0A087WZR4_HUMAN	1	238.017	3.38017	Dengue	QC	NaN	NaN	NaN	29.8962	0.229871
Dengue / QC	_VLTGNPRLDLQEINNWVQAQMKGK_	P36955	1.80322	1.80322	1.07319e-06	2.05595e-06	50	P36955	SERPINF1	Pigment epithelium-derived factor	PEDF_HUMAN	1	248.998	3.48998	Dengue	QC	NaN	NaN	NaN	9.99806	0.128133
Dengue / QC	_ALLFIPR_	P08238	1.41977	1.41977	1.08295e-06	2.07326e-06	34	P08238	HSP90AB1	Heat shock protein HSP 90-beta	HS90B_HUMAN	1	167.543	2.67543	Dengue	QC	NaN	NaN	NaN	13.3591	0.388204
Dengue / QC	_RQLTPYAQR_	P06727	0.741242	0.741242	1.09076e-06	2.08399e-06	42	P06727	APOA4	Apolipoprotein A-IV	APOA4_HUMAN	1	67.1615	1.67161	Dengue	QC	NaN	NaN	NaN	21.0349	0.120732
Dengue / QC	_EDYLDVYVFGVGPLVNQVNINALASK_	B4E1Z4	1.04576	1.04576	1.104e-06	2.10716e-06	132	B4E1Z4	NaN	cDNA FLJ55673, highly similar to Complement factor B (EC 3.4.21.47)	B4E1Z4_HUMAN	1	106.445	2.06445	Dengue	QC	NaN	NaN	NaN	30.3866	0.140816
Dengue / QC	_C[Carbamidomethyl (C)]DPHEATC[Carbamidomethyl (C)]YDDGKTYHVGEQWQK_	P02751;P02751-15;P02751-3;P02751-7	0.954483	0.954483	1.10578e-06	2.10914e-06	42	P02751;P02751-15;P02751-3;P02751-7	FN1	Fibronectin;Isoform 15 of Fibronectin;Isoform 3 of Fibronectin;Isoform 7 of Fibronectin	FINC_HUMAN	1	93.7885	1.93789	Dengue	QC	NaN	NaN	NaN	36.8695	0.171638
Dengue / QC	_IRPFFPQQ_	P02675	2.13551	2.13551	1.11576e-06	2.12533e-06	150	P02675	FGB	Fibrinogen beta chain	FIBB_HUMAN	1	339.391	4.39391	Dengue	QC	NaN	NaN	NaN	137.804	0.372962
Dengue / QC	_EKAEAQAQYSAAVAK_	Q14624	-0.746447	0.746447	1.13455e-06	2.1575e-06	174	Q14624	ITIH4	Inter-alpha-trypsin inhibitor heavy chain H4	ITIH4_HUMAN	1	-40.393	0.59607	Dengue	QC	NaN	NaN	NaN	41.844	0.145759
Dengue / QC	_SEDC[Carbamidomethyl (C)]FILDHGK_	P06396	0.616099	0.616099	1.14578e-06	2.17741e-06	72	P06396	GSN	Gelsolin	GELS_HUMAN	1	53.2725	1.53272	Dengue	QC	NaN	NaN	NaN	16.7942	0.106215
Dengue / QC	_ALWEKPFISSR_	P29622	0.360926	0.360926	1.16664e-06	2.21408e-06	96	P29622	SERPINA4	Kallistatin	KAIN_HUMAN	1	28.425	1.28425	Dengue	QC	NaN	NaN	NaN	56.0797	0.0805842
Dengue / QC	_RLGNGVQC[Carbamidomethyl (C)]LAMGWGLLGR_	P08246	1.94485	1.94485	1.18152e-06	2.24008e-06	26	P08246	ELANE	Neutrophil elastase	ELNE_HUMAN	1	284.997	3.84997	Dengue	QC	NaN	NaN	NaN	18.1107	0.284307
Dengue / QC	_RQDGSVDFFR_	O75636	-0.600737	0.600737	1.19393e-06	2.26286e-06	156	O75636	FCN3	Ficolin-3	FCN3_HUMAN	1	-34.0583	0.659417	Dengue	QC	NaN	NaN	NaN	40.0747	0.104235
Dengue / QC	_NIETIINTFHQYSVK_	P06702	2.13199	2.13199	1.20487e-06	2.2813e-06	50	P06702	S100A9	Protein S100-A9	S10A9_HUMAN	1	338.322	4.38322	Dengue	QC	NaN	NaN	NaN	33.982	0.261462
Dengue / QC	_INC[Carbamidomethyl (C)]QGKTYLFKGSQYWR_	P04004	2.42362	2.42362	1.22555e-06	2.31583e-06	56	P04004	VTN	Vitronectin	VTNC_HUMAN	1	436.516	5.36516	Dengue	QC	NaN	NaN	NaN	40.9448	0.29562
Dengue / QC	_VAQVIIPSTYVPGTTNHDIALLR_	F5H8B0;P08709;P08709-2	0.73132	0.73132	1.24497e-06	2.35097e-06	114	F5H8B0;P08709;P08709-2	F7	Coagulation factor VII;Coagulation factor VII;Isoform B of Coagulation factor VII	F5H8B0_HUMAN;FA7_HUMAN;FA7_HUMAN	1	66.0158	1.66016	Dengue	QC	NaN	NaN	NaN	42.8337	0.119589
Dengue / QC	_VTGVVLFR_	P08294	0.86144	0.86144	1.24766e-06	2.35526e-06	70	P08294	SOD3	Extracellular superoxide dismutase [Cu-Zn]	SODE_HUMAN	1	81.6851	1.81685	Dengue	QC	NaN	NaN	NaN	62.9828	0.168204
Dengue / QC	_VVVQTESGGR_	P20742	3.24769	3.24769	1.25346e-06	2.36465e-06	64	P20742	PZP	Pregnancy zone protein	PZP_HUMAN	1	849.841	9.49841	Dengue	QC	NaN	NaN	NaN	30.4025	0.433468
Dengue / QC	_QGETLNFLEIGYSR_	Q16610	0.858094	0.858094	1.31894e-06	2.48076e-06	96	Q16610	ECM1	Extracellular matrix protein 1	ECM1_HUMAN	1	81.2642	1.81264	Dengue	QC	NaN	NaN	NaN	61.3256	0.192837
Dengue / QC	_QLPGGQNPVSYVYLEVVSK_	P01031	0.606618	0.606618	1.32024e-06	2.48237e-06	146	P01031	C5	Complement C5	CO5_HUMAN	1	52.2685	1.52269	Dengue	QC	NaN	NaN	NaN	85.7497	0.10462
Dengue / QC	_AVLTIDEK_	P01009	-0.434432	0.434432	1.32343e-06	2.48673e-06	176	P01009	SERPINA1	Alpha-1-antitrypsin	A1AT_HUMAN	1	-26.0015	0.739985	Dengue	QC	NaN	NaN	NaN	63.8991	0.0817051
Dengue / QC	_TVM[Oxidation (M)]VNIENPEGIPVKQDSLSSQNQLGVLPLSWDIPELVNM[Oxidation (M)]GQWK_	P01024	1.31295	1.31295	1.34648e-06	2.52837e-06	72	P01024	C3	Complement C3	CO3_HUMAN	1	148.45	2.4845	Dengue	QC	NaN	NaN	NaN	18.4827	0.141772
Dengue / QC	_ASEQAELPR_	Q86UD1	0.611212	0.611212	1.35005e-06	2.5334e-06	64	Q86UD1	OAF	Out at first protein homolog	OAF_HUMAN	1	52.7542	1.52754	Dengue	QC	NaN	NaN	NaN	53.46	0.129135
Dengue / QC	_EGGPSQIGDALGFAVR_	P04275	0.693918	0.693918	1.35118e-06	2.53469e-06	80	P04275	VWF	von Willebrand factor	VWF_HUMAN	1	61.7671	1.61767	Dengue	QC	NaN	NaN	NaN	72.9267	0.137213
Dengue / QC	_IDLADFEK_	Q08830	0.98757	0.98757	1.36625e-06	2.55789e-06	50	Q08830	FGL1	Fibrinogen-like protein 1	FGL1_HUMAN	1	98.2842	1.98284	Dengue	QC	NaN	NaN	NaN	42.9205	0.158222
Dengue / QC	_DGHVILQLNSIPSSDFLC[Carbamidomethyl (C)]VR_	P01031	0.892576	0.892576	1.44785e-06	2.69381e-06	76	P01031	C5	Complement C5	CO5_HUMAN	1	85.6488	1.85649	Dengue	QC	NaN	NaN	NaN	31.642	0.141419
Dengue / QC	_RNFGYTLR_	P05546	0.825622	0.825622	1.48235e-06	2.74899e-06	82	P05546	SERPIND1	Heparin cofactor 2	HEP2_HUMAN	1	77.2299	1.7723	Dengue	QC	NaN	NaN	NaN	29.3751	0.100689
Dengue / QC	_WTPPRAQITGYRLTVGLTR_	P02751;P02751-15;P02751-3;P02751-7	1.77523	1.77523	1.50438e-06	2.78635e-06	46	P02751;P02751-15;P02751-3;P02751-7	FN1	Fibronectin;Isoform 15 of Fibronectin;Isoform 3 of Fibronectin;Isoform 7 of Fibronectin	FINC_HUMAN	1	242.293	3.42293	Dengue	QC	NaN	NaN	NaN	38.0666	0.276865
Dengue / QC	_S[Acetyl (Protein N-term)]ETAPAETATPAPVEK_	P16401	2.07898	2.07898	1.50468e-06	2.78635e-06	14	P16401	HIST1H1B	Histone H1.5	H15_HUMAN	1	322.507	4.22507	Dengue	QC	NaN	NaN	NaN	7.30518	0.491393
Dengue / QC	_LKC[Carbamidomethyl (C)]LAYDFYPGK_	P25311	1.36981	1.36981	1.52487e-06	2.81956e-06	42	P25311	AZGP1	Zinc-alpha-2-glycoprotein	ZA2G_HUMAN	1	158.437	2.58437	Dengue	QC	NaN	NaN	NaN	37.3769	0.239481
Dengue / QC	_AFVNC[Carbamidomethyl (C)]DENSR_	P01833	0.955687	0.955687	1.54017e-06	2.84509e-06	108	P01833	PIGR	Polymeric immunoglobulin receptor	PIGR_HUMAN	1	93.9502	1.9395	Dengue	QC	NaN	NaN	NaN	92.5257	0.224557
Dengue / QC	_LMNIFLKDSITTWEILAVSMSDKK_	P01024	0.952561	0.952561	1.54656e-06	2.85597e-06	150	P01024	C3	Complement C3	CO3_HUMAN	1	93.5305	1.93531	Dengue	QC	NaN	NaN	NaN	92.0817	0.145941
Dengue / QC	_EQVQSC[Carbamidomethyl (C)]GPPPELLNGNVKEK_	P08603	0.57408	0.57408	1.55545e-06	2.87051e-06	138	P08603	CFH	Complement factor H	CFAH_HUMAN	1	48.8728	1.48873	Dengue	QC	NaN	NaN	NaN	124.685	0.102353
Dengue / QC	_GWVTDGFSSLK_	B0YIW2;P02656	1.90938	1.90938	1.58927e-06	2.93007e-06	20	B0YIW2;P02656	APOC3	Apolipoprotein C-III	B0YIW2_HUMAN;APOC3_HUMAN	1	275.648	3.75648	Dengue	QC	NaN	NaN	NaN	14.246	0.222771
Dengue / QC	_TNTGLALR_	P04275	0.834986	0.834986	1.61158e-06	2.96543e-06	32	P04275	VWF	von Willebrand factor	VWF_HUMAN	1	78.384	1.78384	Dengue	QC	NaN	NaN	NaN	23.2237	0.129042
Dengue / QC	_KFIC[Carbamidomethyl (C)]PLTGLWPINTLKC[Carbamidomethyl (C)]TPR_	P02749	4.40087	4.40087	1.63896e-06	3.01191e-06	22	P02749	APOH	Beta-2-glycoprotein 1	APOH_HUMAN	1	2012.48	21.1248	Dengue	QC	NaN	NaN	NaN	13.682	0.436734
Dengue / QC	_RTHLPEVFLSKVLEPTLK_	P02774;P02774-3	1.98405	1.98405	1.64715e-06	3.02599e-06	90	P02774;P02774-3	GC	Vitamin D-binding protein;Isoform 3 of Vitamin D-binding protein	VTDB_HUMAN	1	295.601	3.95601	Dengue	QC	NaN	NaN	NaN	80.9933	0.34046
Dengue / QC	_VLSLAQEQVGGSPEKLQETSNWLLSQQQADGSFQDPC[Carbamidomethyl (C)]PVLDR_	A0A140TA49	0.533558	0.533558	1.65437e-06	3.03827e-06	108	A0A140TA49	C4A	Complement C4-A	A0A140TA49_HUMAN	1	44.7495	1.44749	Dengue	QC	NaN	NaN	NaN	77.4437	0.136754
Dengue / QC	_ERVYFFKGK_	P04004	1.30831	1.30831	1.66421e-06	3.05239e-06	32	P04004	VTN	Vitronectin	VTNC_HUMAN	1	147.651	2.47651	Dengue	QC	NaN	NaN	NaN	20.5934	0.189186
Dengue / QC	_MYYSAVDPTK_	P00450	-0.620246	0.620246	1.68049e-06	3.0763e-06	156	P00450	CP	Ceruloplasmin	CERU_HUMAN	1	-34.944	0.65056	Dengue	QC	NaN	NaN	NaN	51.0647	0.111632
Dengue / QC	_KADGSYAAWLSR_	P0C0L5	-0.409595	0.409595	1.68206e-06	3.07818e-06	174	P0C0L5	C4B	Complement C4-B	CO4B_HUMAN	1	-24.7165	0.752835	Dengue	QC	NaN	NaN	NaN	103.897	0.0822876
Dengue / QC	_LIENGYFHPVK_	P05160	0.315211	0.315211	1.68495e-06	3.08247e-06	80	P05160	F13B	Coagulation factor XIII B chain	F13B_HUMAN	1	24.4194	1.24419	Dengue	QC	NaN	NaN	NaN	48.0939	0.0655991
Dengue / QC	_YLYEIARRHPYFYAPELLFFAK_	P02768	0.446191	0.446191	1.69754e-06	3.10252e-06	140	P02768	ALB	Serum albumin	ALBU_HUMAN	1	36.2438	1.36244	Dengue	QC	NaN	NaN	NaN	86.347	0.0886916
Dengue / QC	_QSTLVLFPGDLR_	P14780	1.00193	1.00193	1.7092e-06	3.12282e-06	64	P14780	MMP9	Matrix metalloproteinase-9	MMP9_HUMAN	1	100.268	2.00268	Dengue	QC	NaN	NaN	NaN	48.988	0.221075
Dengue / QC	_VTM[Oxidation (M)]TEDTSTDTAYMELSSLR_	A0A0C4DH33	0.666587	0.666587	1.77626e-06	3.23598e-06	42	A0A0C4DH33	IGHV1-24	Immunoglobulin heavy variable 1-24	HV124_HUMAN	1	58.7313	1.58731	Dengue	QC	NaN	NaN	NaN	19.7941	0.0969169
Dengue / QC	_ALVLIAFAQYLQQC[Carbamidomethyl (C)]PFEDHVKLVNEVTEFAK_	P02768	0.697343	0.697343	1.78919e-06	3.2585e-06	162	P02768	ALB	Serum albumin	ALBU_HUMAN	1	62.1516	1.62152	Dengue	QC	NaN	NaN	NaN	98.0862	0.119189
Dengue / QC	_LYIEYGIQR_	Q9NPH3;Q9NPH3-2;Q9NPH3-5	0.686902	0.686902	1.79358e-06	3.26544e-06	46	Q9NPH3;Q9NPH3-2;Q9NPH3-5	IL1RAP	Interleukin-1 receptor accessory protein;Isoform 2 of Interleukin-1 receptor accessory protein;Isoform 4 of Interleukin-1 receptor accessory protein	IL1AP_HUMAN	1	60.9823	1.60982	Dengue	QC	NaN	NaN	NaN	16.5439	0.166462
Dengue / QC	_ETTDTEQTPGQEVVLSPGSFMSITFR_	P48740	0.36541	0.36541	1.85111e-06	3.36371e-06	98	P48740	MASP1	Mannan-binding lectin serine protease 1	MASP1_HUMAN	1	28.8247	1.28825	Dengue	QC	NaN	NaN	NaN	48.8934	0.103676
Dengue / QC	_WLGRYYC[Carbamidomethyl (C)]FQGNQFLR_	P02790	0.295496	0.295496	1.92522e-06	3.49057e-06	156	P02790	HPX	Hemopexin	HEMO_HUMAN	1	22.7307	1.22731	Dengue	QC	NaN	NaN	NaN	106.223	0.0556206
Dengue / QC	_FTISRDDSKNTAYLQMNSLK_	A0A0B4J1V6	0.323357	0.323357	1.94492e-06	3.52516e-06	34	A0A0B4J1V6	IGHV3-73	Immunoglobulin heavy variable 3-73	HV373_HUMAN	1	25.1239	1.25124	Dengue	QC	NaN	NaN	NaN	16.1268	0.572179
Dengue / QC	_NQEC[Carbamidomethyl (C)]IALPENIC[Carbamidomethyl (C)]GIGWHLVGNSC[Carbamidomethyl (C)]LK_	O75882;O75882-2	0.675479	0.675479	1.94663e-06	3.52714e-06	88	O75882;O75882-2	ATRN	Attractin;Isoform 2 of Attractin	ATRN_HUMAN	1	59.7127	1.59713	Dengue	QC	NaN	NaN	NaN	26.9309	0.11959
Dengue / QC	_VDGALC[Carbamidomethyl (C)]M[Oxidation (M)]EK_	P02790	0.570867	0.570867	1.95251e-06	3.53668e-06	106	P02790	HPX	Hemopexin	HEMO_HUMAN	1	48.5416	1.48542	Dengue	QC	NaN	NaN	NaN	50.0061	0.104811
Dengue / QC	_GISLANWMC[Carbamidomethyl (C)]LAK_	P61626	1.09518	1.09518	1.97587e-06	3.57557e-06	52	P61626	LYZ	Lysozyme C	LYSC_HUMAN	1	113.64	2.1364	Dengue	QC	NaN	NaN	NaN	40.6017	0.170403
Dengue / QC	_SLDFNTLVDNISVDPETGDLWVGC[Carbamidomethyl (C)]HPNGMK_	P27169	0.624158	0.624158	1.98004e-06	3.58083e-06	82	P27169	PON1	Serum paraoxonase/arylesterase 1	PON1_HUMAN	1	54.131	1.54131	Dengue	QC	NaN	NaN	NaN	28.0325	0.10542
Dengue / QC	_QGYDLSPLTPLSELSVQC[Carbamidomethyl (C)]NR_	P05160	0.692479	0.692479	1.99447e-06	3.60463e-06	92	P05160	F13B	Coagulation factor XIII B chain	F13B_HUMAN	1	61.6058	1.61606	Dengue	QC	NaN	NaN	NaN	27.6412	0.130603
Dengue / QC	_EVVTSEDGSDC[Carbamidomethyl (C)]PEAMDLGTLSGIGTLDGFR_	P02671	1.26985	1.26985	2.02795e-06	3.66048e-06	164	P02671	FGA	Fibrinogen alpha chain	FIBA_HUMAN	1	141.137	2.41137	Dengue	QC	NaN	NaN	NaN	153.479	0.215345
Dengue / QC	_C[Carbamidomethyl (C)]DPVDQC[Carbamidomethyl (C)]QDSETGTFYQIGDSWEK_	P02751;P02751-15;P02751-3;P02751-7	0.800722	0.800722	2.03475e-06	3.6716e-06	116	P02751;P02751-15;P02751-3;P02751-7	FN1	Fibronectin;Isoform 15 of Fibronectin;Isoform 3 of Fibronectin;Isoform 7 of Fibronectin	FINC_HUMAN	1	74.1973	1.74197	Dengue	QC	NaN	NaN	NaN	105.208	0.145257
Dengue / QC	_EIFRWPESPK_	A0A0A0MS09;P01880;P01880-2	0.82607	0.82607	2.03565e-06	3.67205e-06	120	A0A0A0MS09;P01880;P01880-2	IGHD	Immunoglobulin heavy constant delta (Fragment);Immunoglobulin heavy constant delta;Isoform 2 of Immunoglobulin heavy constant delta	A0A0A0MS09_HUMAN;IGHD_HUMAN;IGHD_HUMAN	1	77.2849	1.77285	Dengue	QC	NaN	NaN	NaN	105.071	0.145784
Dengue / QC	_YTHLSC[Carbamidomethyl (C)]DKVFC[Carbamidomethyl (C)]QPWQR_	E7ETH0;G3XAM2;P05156	0.684347	0.684347	2.05774e-06	3.70954e-06	106	E7ETH0;G3XAM2;P05156	CFI	Complement factor I	E7ETH0_HUMAN;G3XAM2_HUMAN;CFAI_HUMAN	1	60.6974	1.60697	Dengue	QC	NaN	NaN	NaN	68.3668	0.135314
Dengue / QC	_PQYMVLVPSLLHTETTEK_	P01023	0.570554	0.570554	2.09292e-06	3.76699e-06	114	P01023	A2M	Alpha-2-macroglobulin	A2MG_HUMAN	1	48.5093	1.48509	Dengue	QC	NaN	NaN	NaN	103.701	0.108187
Dengue / QC	_LLC[Carbamidomethyl (C)]QC[Carbamidomethyl (C)]LGFGSGHFR_	P02751;P02751-15;P02751-3;P02751-7	0.460915	0.460915	2.09833e-06	3.77553e-06	138	P02751;P02751-15;P02751-3;P02751-7	FN1	Fibronectin;Isoform 15 of Fibronectin;Isoform 3 of Fibronectin;Isoform 7 of Fibronectin	FINC_HUMAN	1	37.6415	1.37641	Dengue	QC	NaN	NaN	NaN	128.059	0.0882613
Dengue / QC	_HYYESEVLAMNFQDWATASR_	P08185	0.765517	0.765517	2.12526e-06	3.82036e-06	46	P08185	SERPINA6	Corticosteroid-binding globulin	CBG_HUMAN	1	69.9979	1.69998	Dengue	QC	NaN	NaN	NaN	14.3521	0.127579
Dengue / QC	_QSTQTLYVNVAPR_	P19320	0.66239	0.66239	2.17659e-06	3.90646e-06	92	P19320	VCAM1	Vascular cell adhesion protein 1	VCAM1_HUMAN	1	58.2702	1.5827	Dengue	QC	NaN	NaN	NaN	84.0996	0.128643
Dengue / QC	_TEHYEEQIEAFK_	P02748	-0.437806	0.437806	2.18113e-06	3.91212e-06	168	P02748	C9	Complement component C9	CO9_HUMAN	1	-26.1744	0.738256	Dengue	QC	NaN	NaN	NaN	60.959	0.0847314
Dengue / QC	_KGETFSC[Carbamidomethyl (C)]MVGHEALPLAFTQK_	A0A286YEY5;P01877	1.12942	1.12942	2.18817e-06	3.92351e-06	114	A0A286YEY5;P01877	IGHA2	Immunoglobulin heavy constant alpha 2 (Fragment);Immunoglobulin heavy constant alpha 2	A0A286YEY5_HUMAN;IGHA2_HUMAN	1	118.771	2.18771	Dengue	QC	NaN	NaN	NaN	77.4268	0.200216
Dengue / QC	_SQFVQPIC[Carbamidomethyl (C)]LPEPGSTFPAGHK_	Q04756	0.264683	0.264683	2.27199e-06	4.06355e-06	122	Q04756	HGFAC	Hepatocyte growth factor activator	HGFA_HUMAN	1	20.1372	1.20137	Dengue	QC	NaN	NaN	NaN	103.546	0.0737677
Dengue / QC	_QPSSAFAAFVK_	P01024	-0.41788	0.41788	2.2762e-06	4.06853e-06	166	P01024	C3	Complement C3	CO3_HUMAN	1	-25.1476	0.748524	Dengue	QC	NaN	NaN	NaN	95.7976	0.0747783
Dengue / QC	_TEDSSSFLIDK_	P05543	0.528179	0.528179	2.28374e-06	4.07816e-06	48	P05543	SERPINA7	Thyroxine-binding globulin	THBG_HUMAN	1	44.2108	1.44211	Dengue	QC	NaN	NaN	NaN	43.7931	0.0983894
Dengue / QC	_EGDDDRTVC[Carbamidomethyl (C)]R_	P10909;P10909-2;P10909-4;P10909-5	0.643653	0.643653	2.31019e-06	4.11635e-06	154	P10909;P10909-2;P10909-4;P10909-5	CLU	Clusterin;Isoform 2 of Clusterin;Isoform 4 of Clusterin;Isoform 5 of Clusterin	CLUS_HUMAN	1	56.228	1.56228	Dengue	QC	NaN	NaN	NaN	86.9041	0.0964985
Dengue / QC	_AGFEWNEDGAGTTPSPGLQPAHLTFPLDYHLNQPFIFVLR_	P36955	0.65321	0.65321	2.32161e-06	4.13151e-06	62	P36955	SERPINF1	Pigment epithelium-derived factor	PEDF_HUMAN	1	57.2663	1.57266	Dengue	QC	NaN	NaN	NaN	52.1045	0.152642
Dengue / QC	_DTLTSRPAQGVVTTLENVSPPRR_	P02751;P02751-15;P02751-3;P02751-7	0.434936	0.434936	2.33264e-06	4.14854e-06	98	P02751;P02751-15;P02751-3;P02751-7	FN1	Fibronectin;Isoform 15 of Fibronectin;Isoform 3 of Fibronectin;Isoform 7 of Fibronectin	FINC_HUMAN	1	35.1851	1.35185	Dengue	QC	NaN	NaN	NaN	70.6835	0.101732
Dengue / QC	_KC[Carbamidomethyl (C)]YFPYLENGYNQNYGRK_	P08603	0.563756	0.563756	2.38545e-06	4.23715e-06	134	P08603	CFH	Complement factor H	CFAH_HUMAN	1	47.8113	1.47811	Dengue	QC	NaN	NaN	NaN	90.4001	0.101143
Dengue / QC	_DTANLFPQTSLTLHMWPDTEGTFNVEC[Carbamidomethyl (C)]LTTDHYTGGMK_	P00450	0.614373	0.614373	2.41471e-06	4.28378e-06	146	P00450	CP	Ceruloplasmin	CERU_HUMAN	1	53.0893	1.53089	Dengue	QC	NaN	NaN	NaN	64.3458	0.109756
Dengue / QC	_LLIYGASIR_	A0A087WSY6	-0.415717	0.415717	2.45772e-06	4.35193e-06	176	A0A087WSY6	IGKV3D-15	Immunoglobulin kappa variable 3D-15	KVD15_HUMAN	1	-25.0353	0.749647	Dengue	QC	NaN	NaN	NaN	81.1675	0.0757492
Dengue / QC	_YGM[Oxidation (M)]VAQVTQTLK_	P04114	3.22119	3.22119	2.48882e-06	4.40151e-06	54	P04114	APOB	Apolipoprotein B-100	APOB_HUMAN	1	832.558	9.32558	Dengue	QC	NaN	NaN	NaN	24.0219	0.272741
Dengue / QC	_ITYYHLSFPTNIQAPAVVFR_	P23142-4	0.409327	0.409327	2.60913e-06	4.59712e-06	148	P23142-4	FBLN1	Isoform C of Fibulin-1	FBLN1_HUMAN	1	32.8066	1.32807	Dengue	QC	NaN	NaN	NaN	118.968	0.0798833
Dengue / QC	_TLPEC[Carbamidomethyl (C)]SK_	P43652	0.61571	0.61571	2.62243e-06	4.61912e-06	96	P43652	AFM	Afamin	AFAM_HUMAN	1	53.2312	1.53231	Dengue	QC	NaN	NaN	NaN	85.1109	0.116709
Dengue / QC	_LVPFATELHER_	P06727	0.447411	0.447411	2.63727e-06	4.64237e-06	98	P06727	APOA4	Apolipoprotein A-IV	APOA4_HUMAN	1	36.3591	1.36359	Dengue	QC	NaN	NaN	NaN	91.2969	0.095979
Dengue / QC	_SLEDLQLTHNKITK_	P51884	0.575136	0.575136	2.64106e-06	4.64761e-06	124	P51884	LUM	Lumican	LUM_HUMAN	1	48.9818	1.48982	Dengue	QC	NaN	NaN	NaN	93.6115	0.108229
Dengue / QC	_ALANSLAC[Carbamidomethyl (C)]QGK_	P04075	2.13832	2.13832	2.6423e-06	4.64836e-06	20	P04075	ALDOA	Fructose-bisphosphate aldolase A	ALDOA_HUMAN	1	340.25	4.4025	Dengue	QC	NaN	NaN	NaN	13.4328	0.27353
Dengue / QC	_VDNALQSGNSQESVTEQDSK_	P01834	-0.41603	0.41603	2.66249e-06	4.68242e-06	176	P01834	IGKC	Immunoglobulin kappa constant	IGKC_HUMAN	1	-25.0516	0.749484	Dengue	QC	NaN	NaN	NaN	65.2346	0.0865186
Dengue / QC	_VYTLNNEK_	H0Y300	1.56919	1.56919	2.76044e-06	4.83673e-06	20	H0Y300	HP	Haptoglobin	H0Y300_HUMAN	1	196.738	2.96738	Dengue	QC	NaN	NaN	NaN	13.9386	0.210586
Dengue / QC	_VSVLC[Carbamidomethyl (C)]QENYLIQEGEEITC[Carbamidomethyl (C)]K_	P08603	0.335616	0.335616	2.83331e-06	4.9522e-06	158	P08603	CFH	Complement factor H	CFAH_HUMAN	1	26.1916	1.26192	Dengue	QC	NaN	NaN	NaN	126.258	0.0690076
Dengue / QC	_NLSVEDAAR_	P04040	1.5529	1.5529	2.84049e-06	4.96321e-06	24	P04040	CAT	Catalase	CATA_HUMAN	1	193.406	2.93406	Dengue	QC	NaN	NaN	NaN	15.9558	0.233063
Dengue / QC	_C[Carbamidomethyl (C)]LAFEC[Carbamidomethyl (C)]PENYRR_	P23142	0.625693	0.625693	2.8947e-06	5.04708e-06	170	P23142	FBLN1	Fibulin-1	FBLN1_HUMAN	1	54.2952	1.54295	Dengue	QC	NaN	NaN	NaN	143.294	0.119759
Dengue / QC	_QKLHELQEKLSPLGEEMR_	P02647	0.975311	0.975311	2.91297e-06	5.07581e-06	88	P02647	APOA1	Apolipoprotein A-I	APOA1_HUMAN	1	96.6065	1.96606	Dengue	QC	NaN	NaN	NaN	59.4099	0.354962
Dengue / QC	_DIYKGVDMR_	H0YAC1;P03952	0.388135	0.388135	2.93238e-06	5.10651e-06	116	H0YAC1;P03952	KLKB1	Plasma kallikrein (Fragment);Plasma kallikrein	H0YAC1_HUMAN;KLKB1_HUMAN	1	30.8701	1.3087	Dengue	QC	NaN	NaN	NaN	34.4406	0.104669
Dengue / QC	_VNVDAVGGEALGR_	P02042	0.345988	0.345988	2.95293e-06	5.14071e-06	148	P02042	HBD	Hemoglobin subunit delta	HBD_HUMAN	1	27.1021	1.27102	Dengue	QC	NaN	NaN	NaN	135.587	0.0637743
Dengue / QC	_TGAVSGHSLK_	H0YAC1;P03952	0.688047	0.688047	2.96097e-06	5.15156e-06	124	H0YAC1;P03952	KLKB1	Plasma kallikrein (Fragment);Plasma kallikrein	H0YAC1_HUMAN;KLKB1_HUMAN	1	61.1101	1.6111	Dengue	QC	NaN	NaN	NaN	53.3114	0.157163
Dengue / QC	_DSHSLTTNIMEILR_	P02671	2.12689	2.12689	3.00431e-06	5.22377e-06	70	P02671	FGA	Fibrinogen alpha chain	FIBA_HUMAN	1	336.775	4.36775	Dengue	QC	NaN	NaN	NaN	41.4557	0.243309
Dengue / QC	_ALTDMPQMR_	P02671	2.35494	2.35494	3.02905e-06	5.26357e-06	156	P02671	FGA	Fibrinogen alpha chain	FIBA_HUMAN	1	411.572	5.11572	Dengue	QC	NaN	NaN	NaN	135.476	0.435262
Dengue / QC	_YEGGREHVAHLLFLRDTK_	P19652	1.05538	1.05538	3.06235e-06	5.31655e-06	120	P19652	ORM2	Alpha-1-acid glycoprotein 2	A1AG2_HUMAN	1	107.826	2.07826	Dengue	QC	NaN	NaN	NaN	106.163	0.182209
Dengue / QC	_HC[Carbamidomethyl (C)]LVTVEK_	P07225	0.521212	0.521212	3.06954e-06	5.32741e-06	72	P07225	PROS1	Vitamin K-dependent protein S	PROS_HUMAN	1	43.5161	1.43516	Dengue	QC	NaN	NaN	NaN	64.1169	0.0940347
Dengue / QC	_DFYVDENTTVR_	P29622	0.551264	0.551264	3.10293e-06	5.37879e-06	46	P29622	SERPINA4	Kallistatin	KAIN_HUMAN	1	46.5369	1.46537	Dengue	QC	NaN	NaN	NaN	41.2639	0.0729972
Dengue / QC	_C[Carbamidomethyl (C)]FESFER_	A0A0U1RR20;Q92954;Q92954-3;Q92954-6	1.0159	1.0159	3.11019e-06	5.38973e-06	84	A0A0U1RR20;Q92954;Q92954-3;Q92954-6	PRG4	Proteoglycan 4;Proteoglycan 4;Isoform C of Proteoglycan 4;Isoform F of Proteoglycan 4	A0A0U1RR20_HUMAN;PRG4_HUMAN;PRG4_HUMAN;PRG4_HUMAN	1	102.216	2.02216	Dengue	QC	NaN	NaN	NaN	10.3282	0.132731
Dengue / QC	_SASNMAIVDVK_	P01023	-0.312557	0.312557	3.14141e-06	5.43995e-06	176	P01023	A2M	Alpha-2-macroglobulin	A2MG_HUMAN	1	-19.4787	0.805213	Dengue	QC	NaN	NaN	NaN	92.4606	0.0651082
Dengue / QC	_FEGIAC[Carbamidomethyl (C)]EISK_	P02748	-0.369365	0.369365	3.14204e-06	5.43995e-06	174	P02748	C9	Complement component C9	CO9_HUMAN	1	-22.5877	0.774123	Dengue	QC	NaN	NaN	NaN	72.9132	0.0710436
Dengue / QC	_GPDFFTR_	P20160	1.32738	1.32738	3.1527e-06	5.45508e-06	36	P20160	AZU1	Azurocidin	CAP7_HUMAN	1	150.946	2.50946	Dengue	QC	NaN	NaN	NaN	20.511	0.229601
Dengue / QC	_LVVLPFPK_	Q9UGM5	-0.517103	0.517103	3.16601e-06	5.47478e-06	174	Q9UGM5	FETUB	Fetuin-B	FETUB_HUMAN	1	-30.1226	0.698774	Dengue	QC	NaN	NaN	NaN	57.7562	0.092267
Dengue / QC	_IDWDDDKFYSTSLK_	A0A0C4DH43	0.685914	0.685914	3.1702e-06	5.48036e-06	68	A0A0C4DH43	IGHV2-70D	Immunoglobulin heavy variable 2-70D	HV70D_HUMAN	1	60.8721	1.60872	Dengue	QC	NaN	NaN	NaN	56.0007	0.108556
Dengue / QC	_NPNGYSFSIPVK_	P04114	0.371902	0.371902	3.22582e-06	5.56804e-06	54	P04114	APOB	Apolipoprotein B-100	APOB_HUMAN	1	29.4058	1.29406	Dengue	QC	NaN	NaN	NaN	40.5548	0.0698017
Dengue / QC	_VVGGEDAKPGQFPWQVVLNGK_	P00740	0.974306	0.974306	3.25939e-06	5.62258e-06	28	P00740	F9	Coagulation factor IX	FA9_HUMAN	1	96.4696	1.9647	Dengue	QC	NaN	NaN	NaN	9.32383	0.111845
Dengue / QC	_ANRPFLVFIREVPLNTIIFMGR_	P01008	0.937434	0.937434	3.26137e-06	5.62428e-06	174	P01008	SERPINC1	Antithrombin-III	ANT3_HUMAN	1	91.5118	1.91512	Dengue	QC	NaN	NaN	NaN	56.1876	0.133031
Dengue / QC	_YQC[Carbamidomethyl (C)]KNYYK_	P00738	3.90924	3.90924	3.30957e-06	5.70048e-06	40	P00738	HP	Haptoglobin	HPT_HUMAN	1	1402.44	15.0244	Dengue	QC	NaN	NaN	NaN	28.166	0.544616
Dengue / QC	_YNILPEKEDSPFALK_	P20742	1.98252	1.98252	3.35568e-06	5.77466e-06	114	P20742	PZP	Pregnancy zone protein	PZP_HUMAN	1	295.182	3.95182	Dengue	QC	NaN	NaN	NaN	78.31	0.335634
Dengue / QC	_LVNIAVDER_	A0A0C4DFP6;Q9NQ79;Q9NQ79-2	0.393805	0.393805	3.37281e-06	5.80052e-06	132	A0A0C4DFP6;Q9NQ79;Q9NQ79-2	CRTAC1	Cartilage acidic protein 1;Cartilage acidic protein 1;Isoform 2 of Cartilage acidic protein 1	A0A0C4DFP6_HUMAN;CRAC1_HUMAN;CRAC1_HUMAN	1	31.3854	1.31385	Dengue	QC	NaN	NaN	NaN	81.5743	0.110661
Dengue / QC	_KEEYGHNEVVEYDC[Carbamidomethyl (C)]NPNFIINGPK_	Q9BXR6	0.793636	0.793636	3.38437e-06	5.81563e-06	58	Q9BXR6	CFHR5	Complement factor H-related protein 5	FHR5_HUMAN	1	73.3437	1.73344	Dengue	QC	NaN	NaN	NaN	44.4703	0.18722
Dengue / QC	_GATDNKGPVLAWINAVSAFR_	Q96KN2	0.523745	0.523745	3.39424e-06	5.83043e-06	60	Q96KN2	CNDP1	Beta-Ala-His dipeptidase	CNDP1_HUMAN	1	43.7682	1.43768	Dengue	QC	NaN	NaN	NaN	45.1617	0.0976264
Dengue / QC	_FRVVSMDENFHPLNELIPLVYIQDPKGNR_	P01023	1.64037	1.64037	3.47666e-06	5.95938e-06	86	P01023	A2M	Alpha-2-macroglobulin	A2MG_HUMAN	1	211.747	3.11747	Dengue	QC	NaN	NaN	NaN	68.743	0.242773
Dengue / QC	_GQGTLSVVTMYHAK_	P01024	-0.328312	0.328312	3.48662e-06	5.97466e-06	176	P01024	C3	Complement C3	CO3_HUMAN	1	-20.3532	0.796468	Dengue	QC	NaN	NaN	NaN	70.9326	0.0586787
Dengue / QC	_NKPGVYTDVAYYLAWIREHTVS_	P00748	1.11571	1.11571	3.50478e-06	6.00396e-06	88	P00748	F12	Coagulation factor XII	FA12_HUMAN	1	116.702	2.16702	Dengue	QC	NaN	NaN	NaN	70.3334	0.217444
Dengue / QC	_AFQPFFVELTMPYSVIR_	P01023	0.435962	0.435962	3.50951e-06	6.01026e-06	176	P01023	A2M	Alpha-2-macroglobulin	A2MG_HUMAN	1	35.2813	1.35281	Dengue	QC	NaN	NaN	NaN	164.92	0.0890816
Dengue / QC	_KITEVALMGHLSC[Carbamidomethyl (C)]DTKEER_	P04114	0.695767	0.695767	3.52475e-06	6.02909e-06	64	P04114	APOB	Apolipoprotein B-100	APOB_HUMAN	1	61.9745	1.61975	Dengue	QC	NaN	NaN	NaN	58.6132	0.113578
Dengue / QC	_DALSSVQESQVAQQAR_	B0YIW2;P02656	-0.344186	0.344186	3.53268e-06	6.04083e-06	176	B0YIW2;P02656	APOC3	Apolipoprotein C-III	B0YIW2_HUMAN;APOC3_HUMAN	1	-21.2248	0.787752	Dengue	QC	NaN	NaN	NaN	114.867	0.0747478
Dengue / QC	_KGGVASGFK_	P06396	0.805038	0.805038	3.5587e-06	6.0799e-06	80	P06396	GSN	Gelsolin	GELS_HUMAN	1	74.7191	1.74719	Dengue	QC	NaN	NaN	NaN	59.1707	0.171138
Dengue / QC	_YWC[Carbamidomethyl (C)]NDGKTPGAVNAC[Carbamidomethyl (C)]HLSC[Carbamidomethyl (C)]SALLQDNIADAVAC[Carbamidomethyl (C)]AK_	P61626	0.639475	0.639475	3.56822e-06	6.09428e-06	30	P61626	LYZ	Lysozyme C	LYSC_HUMAN	1	55.7762	1.55776	Dengue	QC	NaN	NaN	NaN	23.2972	0.187085
Dengue / QC	_TTPSYVAFTDTER_	E9PKE3;P11142	1.03987	1.03987	3.60243e-06	6.14716e-06	44	E9PKE3;P11142	HSPA8	Heat shock cognate 71 kDa protein	E9PKE3_HUMAN;HSP7C_HUMAN	1	105.604	2.05604	Dengue	QC	NaN	NaN	NaN	16.3463	0.199132
Dengue / QC	_TVM[Oxidation (M)]VNIENPEGIPVKQDSLSSQNQLGVLPLSWDIPELVNMGQWK_	P01024	1.23585	1.23585	3.61754e-06	6.1674e-06	54	P01024	C3	Complement C3	CO3_HUMAN	1	135.521	2.35521	Dengue	QC	NaN	NaN	NaN	44.2055	0.215154
Dengue / QC	_HRHPDEAAFFDTASTGK_	P02671	2.21013	2.21013	3.64709e-06	6.21218e-06	170	P02671	FGA	Fibrinogen alpha chain	FIBA_HUMAN	1	362.717	4.62717	Dengue	QC	NaN	NaN	NaN	141.129	0.373563
Dengue / QC	_QLVEIEKVVLHPNYHQVDIGLIK_	P00739	1.27782	1.27782	3.6489e-06	6.21341e-06	96	P00739	HPR	Haptoglobin-related protein	HPTR_HUMAN	1	142.472	2.42472	Dengue	QC	NaN	NaN	NaN	43.728	0.1584
Dengue / QC	_NWGLSVYADKPETTKEQLGEFYEALDC[Carbamidomethyl (C)]LR_	P02763	1.57339	1.57339	3.67464e-06	6.25349e-06	128	P02763	ORM1	Alpha-1-acid glycoprotein 1	A1AG1_HUMAN	1	197.603	2.97603	Dengue	QC	NaN	NaN	NaN	79.7136	0.212113
Dengue / QC	_LLELTGPK_	P04217	-0.405464	0.405464	3.68803e-06	6.27252e-06	176	P04217	A1BG	Alpha-1B-glycoprotein	A1BG_HUMAN	1	-24.5007	0.754993	Dengue	QC	NaN	NaN	NaN	50.1432	0.0781672
Dengue / QC	_NWGLGGHAFC[Carbamidomethyl (C)]R_	P00748	-0.418094	0.418094	3.85521e-06	6.5295e-06	146	P00748	F12	Coagulation factor XII	FA12_HUMAN	1	-25.1587	0.748413	Dengue	QC	NaN	NaN	NaN	55.1544	0.0770134
Dengue / QC	_GPSVFPLAPC[Carbamidomethyl (C)]SRSTSESTAALGC[Carbamidomethyl (C)]LVK_	P01861	0.468035	0.468035	3.93954e-06	6.65736e-06	118	P01861	IGHG4	Immunoglobulin heavy constant gamma 4	IGHG4_HUMAN	1	38.3224	1.38322	Dengue	QC	NaN	NaN	NaN	109.148	0.0994286
Dengue / QC	_AVSM[Oxidation (M)]PSFSILGSDVRVPSYTLILPSLELPVLHVPR_	P04114	0.651976	0.651976	3.94007e-06	6.65736e-06	110	P04114	APOB	Apolipoprotein B-100	APOB_HUMAN	1	57.1319	1.57132	Dengue	QC	NaN	NaN	NaN	73.2872	0.186029
Dengue / QC	_TKC[Carbamidomethyl (C)]TWLIEGQPNR_	O75882;O75882-2	1.0403	1.0403	3.97031e-06	6.70646e-06	56	O75882;O75882-2	ATRN	Attractin;Isoform 2 of Attractin	ATRN_HUMAN	1	105.666	2.05666	Dengue	QC	NaN	NaN	NaN	9.07057	0.114562
Dengue / QC	_AHLDIAGSLEGHLR_	P04114	0.523642	0.523642	4.10688e-06	6.92069e-06	58	P04114	APOB	Apolipoprotein B-100	APOB_HUMAN	1	43.758	1.43758	Dengue	QC	NaN	NaN	NaN	53.1444	0.117513
Dengue / QC	_DAC[Carbamidomethyl (C)]KGDSGGPLVC[Carbamidomethyl (C)]K_	H0YAC1;P03952	0.679268	0.679268	4.16614e-06	7.01016e-06	70	H0YAC1;P03952	KLKB1	Plasma kallikrein (Fragment);Plasma kallikrein	H0YAC1_HUMAN;KLKB1_HUMAN	1	60.1327	1.60133	Dengue	QC	NaN	NaN	NaN	24.0537	0.112677
Dengue / QC	_VAFPLEVVQK_	Q9NPH3;Q9NPH3-2;Q9NPH3-5	0.438638	0.438638	4.20152e-06	7.05716e-06	44	Q9NPH3;Q9NPH3-2;Q9NPH3-5	IL1RAP	Interleukin-1 receptor accessory protein;Isoform 2 of Interleukin-1 receptor accessory protein;Isoform 4 of Interleukin-1 receptor accessory protein	IL1AP_HUMAN	1	35.5324	1.35532	Dengue	QC	NaN	NaN	NaN	27.7695	0.117225
Dengue / QC	_FSGSGAGTDFTLK_	A0A0C4DH68	-0.499701	0.499701	4.21651e-06	7.07607e-06	174	A0A0C4DH68	IGKV2-24	Immunoglobulin kappa variable 2-24	KV224_HUMAN	1	-29.2747	0.707253	Dengue	QC	NaN	NaN	NaN	79.7336	0.0860413
Dengue / QC	_VSGYTFTDYYMHWVQQAPGK_	A0A0G2JMI3	1.75586	1.75586	4.31098e-06	7.22608e-06	30	A0A0G2JMI3	IGHV1-69-2	Immunoglobulin heavy variable 1-69-2	HV692_HUMAN	1	237.727	3.37727	Dengue	QC	NaN	NaN	NaN	17.5809	0.284209
Dengue / QC	_MNVAPAC[Carbamidomethyl (C)]LPERDWAESTLMTQK_	P00742	0.394646	0.394646	4.31921e-06	7.23773e-06	138	P00742	F10	Coagulation factor X	FA10_HUMAN	1	31.462	1.31462	Dengue	QC	NaN	NaN	NaN	93.7193	0.0738708
Dengue / QC	_TRKGNVATEISTER_	P04114	1.65907	1.65907	4.35749e-06	7.29113e-06	52	P04114	APOB	Apolipoprotein B-100	APOB_HUMAN	1	215.813	3.15813	Dengue	QC	NaN	NaN	NaN	31.5067	0.260733
Dengue / QC	_YELDKAFSDRNTLIIYLDK_	P01024	0.696427	0.696427	4.35748e-06	7.29113e-06	58	P01024	C3	Complement C3	CO3_HUMAN	1	62.0487	1.62049	Dengue	QC	NaN	NaN	NaN	21.2723	0.113445
Dengue / QC	_NIPC[Carbamidomethyl (C)]AVTK_	P13671	0.691711	0.691711	4.40667e-06	7.36259e-06	36	P13671	C6	Complement component C6	CO6_HUMAN	1	61.5198	1.6152	Dengue	QC	NaN	NaN	NaN	13.2605	0.108219
Dengue / QC	_AEPLAFTFSHDYK_	P04114	0.361192	0.361192	4.43475e-06	7.40515e-06	106	P04114	APOB	Apolipoprotein B-100	APOB_HUMAN	1	28.4487	1.28449	Dengue	QC	NaN	NaN	NaN	46.5796	0.0833125
Dengue / QC	_IYISGMAPRPSLAKK_	P04004	0.626941	0.626941	4.45112e-06	7.42594e-06	172	P04004	VTN	Vitronectin	VTNC_HUMAN	1	54.4287	1.54429	Dengue	QC	NaN	NaN	NaN	115.205	0.0973117
Dengue / QC	_LLIYGNSNRPSGVPDR_	P01703	-0.840698	0.840698	4.4506e-06	7.42594e-06	172	P01703	IGLV1-40	Immunoglobulin lambda variable 1-40	LV140_HUMAN	1	-44.1627	0.558373	Dengue	QC	NaN	NaN	NaN	49.2861	0.160031
Dengue / QC	_LVTDLTKVHTEC[Carbamidomethyl (C)]C[Carbamidomethyl (C)]HGDLLEC[Carbamidomethyl (C)]ADDR_	P02768	0.930265	0.930265	4.46465e-06	7.44633e-06	150	P02768	ALB	Serum albumin	ALBU_HUMAN	1	90.5627	1.90563	Dengue	QC	NaN	NaN	NaN	132.86	0.190777
Dengue / QC	_DIFPNTVFADSNIDSVMAPDAFVC[Carbamidomethyl (C)]GR_	P03951	1.68765	1.68765	4.47874e-06	7.46543e-06	18	P03951	F11	Coagulation factor XI	FA11_HUMAN	1	222.131	3.22131	Dengue	QC	NaN	NaN	NaN	5.72664	0.103595
Dengue / QC	_EGIVEYPR_	Q92496;Q92496-2	0.368597	0.368597	4.58595e-06	7.62625e-06	118	Q92496;Q92496-2	CFHR4	Complement factor H-related protein 4;Isoform 2 of Complement factor H-related protein 4	FHR4_HUMAN	1	29.1096	1.2911	Dengue	QC	NaN	NaN	NaN	78.7743	0.0971395
Dengue / QC	_FC[Carbamidomethyl (C)]GTFRPAPLVAPGNQVTLR_	Q15113	0.721284	0.721284	4.60542e-06	7.65639e-06	40	Q15113	PCOLCE	Procollagen C-endopeptidase enhancer 1	PCOC1_HUMAN	1	64.8649	1.64865	Dengue	QC	NaN	NaN	NaN	27.8385	0.172456
Dengue / QC	_ADDKETC[Carbamidomethyl (C)]FAEEGK_	P02768	-0.512056	0.512056	4.67432e-06	7.75733e-06	160	P02768	ALB	Serum albumin	ALBU_HUMAN	1	-29.8778	0.701222	Dengue	QC	NaN	NaN	NaN	55.2158	0.0958308
Dengue / QC	_FISLGEAC[Carbamidomethyl (C)]KK_	P01024	0.263724	0.263724	4.69093e-06	7.78035e-06	110	P01024	C3	Complement C3	CO3_HUMAN	1	20.0574	1.20057	Dengue	QC	NaN	NaN	NaN	99.19	0.11292
Dengue / QC	_SSGSLLNNAIK_	P01023	-0.430508	0.430508	4.73447e-06	7.84569e-06	176	P01023	A2M	Alpha-2-macroglobulin	A2MG_HUMAN	1	-25.7999	0.742001	Dengue	QC	NaN	NaN	NaN	91.2745	0.0775082
Dengue / QC	_TTPPMLDSDGSFFLYSKLTVDK_	P01859	0.133155	0.133155	4.76388e-06	7.89213e-06	82	P01859	IGHG2	Immunoglobulin heavy constant gamma 2	IGHG2_HUMAN	1	9.66894	1.09669	Dengue	QC	NaN	NaN	NaN	59.4933	0.120987
Dengue / QC	_LKGPLLNK_	P01024	1.33939	1.33939	4.8685e-06	8.0511e-06	70	P01024	C3	Complement C3	CO3_HUMAN	1	153.044	2.53044	Dengue	QC	NaN	NaN	NaN	22.2266	0.163291
Dengue / QC	_LVGGPMDASVEEEGVR_	P01034	1.72619	1.72619	4.87516e-06	8.0577e-06	20	P01034	CST3	Cystatin-C	CYTC_HUMAN	1	230.854	3.30854	Dengue	QC	NaN	NaN	NaN	13.5917	0.266807
Dengue / QC	_REQPGVYTK_	H0YAC1;P03952	0.387459	0.387459	4.91088e-06	8.10494e-06	162	H0YAC1;P03952	KLKB1	Plasma kallikrein (Fragment);Plasma kallikrein	H0YAC1_HUMAN;KLKB1_HUMAN	1	30.8088	1.30809	Dengue	QC	NaN	NaN	NaN	55.2939	0.0802323
Dengue / QC	_LLIYYDDLLPSGVSDRFSGSK_	A0A0B4J1U3	0.892576	0.892576	4.97502e-06	8.20127e-06	84	A0A0B4J1U3	IGLV1-36	Immunoglobulin lambda variable 1-36	LV136_HUMAN	1	85.6489	1.85649	Dengue	QC	NaN	NaN	NaN	54.1494	0.192169
Dengue / QC	_NMAEQIIQEIYSQIQSK_	A0A0B4J1R6;P29401;P29401-2	1.56892	1.56892	4.99758e-06	8.23369e-06	30	A0A0B4J1R6;P29401;P29401-2	TKT	Transketolase;Transketolase;Isoform 2 of Transketolase	A0A0B4J1R6_HUMAN;TKT_HUMAN;TKT_HUMAN	1	196.682	2.96682	Dengue	QC	NaN	NaN	NaN	14.7385	0.292231
Dengue / QC	_WSSPPQC[Carbamidomethyl (C)]EGLPC[Carbamidomethyl (C)]KSPPEISHGVVAHMSDSYQYGEEVTYK_	P08603	1.05023	1.05023	5.00303e-06	8.24029e-06	72	P08603	CFH	Complement factor H	CFAH_HUMAN	1	107.085	2.07085	Dengue	QC	NaN	NaN	NaN	63.6314	0.22388
Dengue / QC	_YTLNKNSLKIEIPLPFGGK_	P04114	0.364674	0.364674	5.04742e-06	8.30858e-06	134	P04114	APOB	Apolipoprotein B-100	APOB_HUMAN	1	28.759	1.28759	Dengue	QC	NaN	NaN	NaN	104.783	0.0884154
Dengue / QC	_IMADSGPIYDKTYAGGR_	P07996	1.07402	1.07402	5.09241e-06	8.37779e-06	22	P07996	THBS1	Thrombospondin-1	TSP1_HUMAN	1	110.529	2.10529	Dengue	QC	NaN	NaN	NaN	14.7409	0.149483
Dengue / QC	_IYGNQDTSSQLKKFYNQVSTPLLR_	P19823	0.82482	0.82482	5.11145e-06	8.40668e-06	100	P19823	ITIH2	Inter-alpha-trypsin inhibitor heavy chain H2	ITIH2_HUMAN	1	77.1314	1.77131	Dengue	QC	NaN	NaN	NaN	81.5303	0.124216
Dengue / QC	_SVGSQWASPENPC[Carbamidomethyl (C)]LINEC[Carbamidomethyl (C)]VR_	P04275	0.727422	0.727422	5.15236e-06	8.46382e-06	108	P04275	VWF	von Willebrand factor	VWF_HUMAN	1	65.5678	1.65568	Dengue	QC	NaN	NaN	NaN	98.9971	0.126127
Dengue / QC	_VFEAMNSYDLGC[Carbamidomethyl (C)]GPGGGDSALQVFQAAGLAFSDGDQWTLSR_	P0C0L5	1.24915	1.24915	5.15364e-06	8.46382e-06	126	P0C0L5	C4B	Complement C4-B	CO4B_HUMAN	1	137.702	2.37702	Dengue	QC	NaN	NaN	NaN	14.6932	0.154623
Dengue / QC	_SGLSTGWTQLSKLLELTGPK_	P04217	1.38763	1.38763	5.21414e-06	8.55823e-06	138	P04217	A1BG	Alpha-1B-glycoprotein	A1BG_HUMAN	1	161.649	2.61649	Dengue	QC	NaN	NaN	NaN	108.194	0.239413
Dengue / QC	_VAAGAFQGLR_	P02750	-0.363852	0.363852	5.23296e-06	8.58665e-06	172	P02750	LRG1	Leucine-rich alpha-2-glycoprotein	A2GL_HUMAN	1	-22.2913	0.777087	Dengue	QC	NaN	NaN	NaN	108.752	0.0813505
Dengue / QC	_AGALQLLLVGDKVPHDLDMLLR_	P55058	2.1121	2.1121	5.26488e-06	8.63652e-06	28	P55058	PLTP	Phospholipid transfer protein	PLTP_HUMAN	1	332.319	4.32319	Dengue	QC	NaN	NaN	NaN	20.2827	0.274955
Dengue / QC	_HLEVDVWVIEPQGLR_	P19823	0.615098	0.615098	5.28066e-06	8.65742e-06	176	P19823	ITIH2	Inter-alpha-trypsin inhibitor heavy chain H2	ITIH2_HUMAN	1	53.1662	1.53166	Dengue	QC	NaN	NaN	NaN	79.026	0.140477
Dengue / QC	_AQLYIDC[Carbamidomethyl (C)]EK_	P07996	1.0408	1.0408	5.28327e-06	8.6592e-06	30	P07996	THBS1	Thrombospondin-1	TSP1_HUMAN	1	105.737	2.05737	Dengue	QC	NaN	NaN	NaN	14.3163	0.210272
Dengue / QC	_AWGESTPLANKPGK_	A0A0A0MRJ7;P12259	0.492798	0.492798	5.29428e-06	8.67225e-06	96	A0A0A0MRJ7;P12259	F5	Coagulation factor V	A0A0A0MRJ7_HUMAN;FA5_HUMAN	1	40.7172	1.40717	Dengue	QC	NaN	NaN	NaN	53.851	0.128872
Dengue / QC	_GRFIISR_	A0A0C4DH35	1.10936	1.10936	5.33715e-06	8.7324e-06	114	A0A0C4DH35	IGHV3-35	Immunoglobulin heavy variable 3-35 (non-functional) (Fragment)	A0A0C4DH35_HUMAN	1	115.75	2.1575	Dengue	QC	NaN	NaN	NaN	82.5991	0.215248
Dengue / QC	_TMTIHNGMFFSTYDRDNDGWLTSDPRK_	P02675	1.45874	1.45874	5.33645e-06	8.7324e-06	42	P02675	FGB	Fibrinogen beta chain	FIBB_HUMAN	1	174.869	2.74869	Dengue	QC	NaN	NaN	NaN	34.5601	0.219834
Dengue / QC	_VVAEGFDFANGINISPDGK_	P27169	1.16772	1.16772	5.42958e-06	8.86577e-06	48	P27169	PON1	Serum paraoxonase/arylesterase 1	PON1_HUMAN	1	124.657	2.24657	Dengue	QC	NaN	NaN	NaN	8.63582	0.0983423
Dengue / QC	_TVGSDTFYSFKYEIKEGDC[Carbamidomethyl (C)]PVQSGK_	P01042	0.66098	0.66098	5.47807e-06	8.93467e-06	86	P01042	KNG1	Kininogen-1	KNG1_HUMAN	1	58.1156	1.58116	Dengue	QC	NaN	NaN	NaN	80.3177	0.127391
Dengue / QC	_TPFVTHPGYDTGNGIQLPGTSGQQPSVGQQMIFEEHGFRR_	P02751;P02751-15;P02751-3;P02751-7	0.507681	0.507681	5.51437e-06	8.98614e-06	148	P02751;P02751-15;P02751-3;P02751-7	FN1	Fibronectin;Isoform 15 of Fibronectin;Isoform 3 of Fibronectin;Isoform 7 of Fibronectin	FINC_HUMAN	1	42.1763	1.42176	Dengue	QC	NaN	NaN	NaN	134.545	0.0985064
Dengue / QC	_GGVASGFKHVVPNEVVVQR_	P06396	0.965007	0.965007	5.5163e-06	8.98671e-06	52	P06396	GSN	Gelsolin	GELS_HUMAN	1	95.2072	1.95207	Dengue	QC	NaN	NaN	NaN	24.5366	0.175857
Dengue / QC	_LGNWSAMPSC[Carbamidomethyl (C)]K_	P02749	1.37418	1.37418	5.54119e-06	9.02417e-06	50	P02749	APOH	Beta-2-glycoprotein 1	APOH_HUMAN	1	159.22	2.5922	Dengue	QC	NaN	NaN	NaN	11.3653	0.151527
Dengue / QC	_IAQWQSLK_	P20742	2.41564	2.41564	5.59458e-06	9.10381e-06	70	P20742	PZP	Pregnancy zone protein	PZP_HUMAN	1	433.555	5.33555	Dengue	QC	NaN	NaN	NaN	54.1012	0.499526
Dengue / QC	_LQDRGPDVLTATVSGK_	Q14624	-0.50228	0.50228	5.6011e-06	9.10921e-06	174	Q14624	ITIH4	Inter-alpha-trypsin inhibitor heavy chain H4	ITIH4_HUMAN	1	-29.401	0.70599	Dengue	QC	NaN	NaN	NaN	45.9018	0.0983984
Dengue / QC	_VRVELLHNPAFC[Carbamidomethyl (C)]SLATTKR_	P01024	0.596361	0.596361	5.62711e-06	9.14876e-06	160	P01024	C3	Complement C3	CO3_HUMAN	1	51.1898	1.5119	Dengue	QC	NaN	NaN	NaN	147.568	0.0995671
Dengue / QC	_VDFTLSSER_	P0C0L5	-0.329737	0.329737	5.62865e-06	9.14876e-06	176	P0C0L5	C4B	Complement C4-B	CO4B_HUMAN	1	-20.4319	0.795681	Dengue	QC	NaN	NaN	NaN	101.109	0.0688782
Dengue / QC	_GHFTEEDKATITSLWGK_	P69891;P69892	3.64854	3.64854	5.63791e-06	9.15858e-06	20	P69891;P69892	HBG1;HBG2	Hemoglobin subunit gamma-1;Hemoglobin subunit gamma-2	HBG1_HUMAN;HBG2_HUMAN	1	1154.07	12.5407	Dengue	QC	NaN	NaN	NaN	12.9916	0.468982
Dengue / QC	_ADSSPVKAGVETTTPSKQSNNK_	P0DOY2	2.51454	2.51454	5.67802e-06	9.21696e-06	74	P0DOY2	IGLC2	Immunoglobulin lambda constant 2	IGLC2_HUMAN	1	471.414	5.71414	Dengue	QC	NaN	NaN	NaN	49.0882	0.342043
Dengue / QC	_YGTLFTMDR_	Q15582	0.753846	0.753846	5.67871e-06	9.21696e-06	36	Q15582	TGFBI	Transforming growth factor-beta-induced protein ig-h3	BGH3_HUMAN	1	68.6282	1.68628	Dengue	QC	NaN	NaN	NaN	25.7841	0.132034
Dengue / QC	_LTVDKSR_	P01857	0.853327	0.853327	5.80724e-06	9.40677e-06	156	P01857	IGHG1	Immunoglobulin heavy constant gamma 1	IGHG1_HUMAN	1	80.6662	1.80666	Dengue	QC	NaN	NaN	NaN	110.974	0.191332
Dengue / QC	_EC[Carbamidomethyl (C)]VGFEAVQEVPVGLVQPASATLYDYYNPER_	P0C0L5	0.436911	0.436911	5.83045e-06	9.43629e-06	156	P0C0L5	C4B	Complement C4-B	CO4B_HUMAN	1	35.3702	1.3537	Dengue	QC	NaN	NaN	NaN	112.287	0.103969
Dengue / QC	_GMADQDGLKPTIDKPSEDSPPLEM[Oxidation (M)]LGPR_	P19827	0.717095	0.717095	5.84649e-06	9.45956e-06	66	P19827	ITIH1	Inter-alpha-trypsin inhibitor heavy chain H1	ITIH1_HUMAN	1	64.3869	1.64387	Dengue	QC	NaN	NaN	NaN	56.209	0.135924
Dengue / QC	_LSC[Carbamidomethyl (C)]AASGFTFDDYGMSWVR_	A0A0C4DH32	0.789435	0.789435	5.96792e-06	9.6341e-06	40	A0A0C4DH32	IGHV3-20	Immunoglobulin heavy variable 3-20	HV320_HUMAN	1	72.8397	1.7284	Dengue	QC	NaN	NaN	NaN	28.5168	0.185763
Dengue / QC	_SRWQQGNIFSC[Carbamidomethyl (C)]SVMHEALHNR_	P01860	0.697017	0.697017	5.9826e-06	9.65505e-06	114	P01860	IGHG3	Immunoglobulin heavy constant gamma 3	IGHG3_HUMAN	1	62.1149	1.62115	Dengue	QC	NaN	NaN	NaN	103.715	0.101437
Dengue / QC	_AMAVEDIISR_	P07357	-0.560226	0.560226	6.01229e-06	9.70021e-06	158	P07357	C8A	Complement component C8 alpha chain	CO8A_HUMAN	1	-32.1804	0.678196	Dengue	QC	NaN	NaN	NaN	43.246	0.099576
Dengue / QC	_QPSSAFAAFVKR_	P01024	-0.503474	0.503474	6.29245e-06	1.01149e-05	176	P01024	C3	Complement C3	CO3_HUMAN	1	-29.4594	0.705406	Dengue	QC	NaN	NaN	NaN	57.4005	0.104831
Dengue / QC	_DSGEDPATC[Carbamidomethyl (C)]AFQR_	Q13103	0.30128	0.30128	6.33755e-06	1.01845e-05	76	Q13103	SPP2	Secreted phosphoprotein 24	SPP24_HUMAN	1	23.2237	1.23224	Dengue	QC	NaN	NaN	NaN	65.9801	0.0988939
Dengue / QC	_DVYKAGEQVTYTC[Carbamidomethyl (C)]ATYYK_	P08603	0.672473	0.672473	6.3738e-06	1.02341e-05	70	P08603	CFH	Complement factor H	CFAH_HUMAN	1	59.3802	1.5938	Dengue	QC	NaN	NaN	NaN	27.6793	0.133983
Dengue / QC	_SYSC[Carbamidomethyl (C)]QVTHEGSTVEKTVAPTEC[Carbamidomethyl (C)]S_	P0DOY2	1.57228	1.57228	6.39441e-06	1.02643e-05	168	P0DOY2	IGLC2	Immunoglobulin lambda constant 2	IGLC2_HUMAN	1	197.374	2.97374	Dengue	QC	NaN	NaN	NaN	153.509	0.287968
Dengue / QC	_NKRDTMVEDLVVLVR_	P07358	1.05011	1.05011	6.39754e-06	1.02664e-05	38	P07358	C8B	Complement component C8 beta chain	CO8B_HUMAN	1	107.069	2.07069	Dengue	QC	NaN	NaN	NaN	19.7128	0.206902
Dengue / QC	_FDHVITNMNNNYEPR_	D6R934;P02746	-0.447216	0.447216	6.43785e-06	1.03165e-05	176	D6R934;P02746	C1QB	Complement C1q subcomponent subunit B	D6R934_HUMAN;C1QB_HUMAN	1	-26.6543	0.733457	Dengue	QC	NaN	NaN	NaN	38.42	0.0932987
Dengue / QC	_FMQAVTGWK_	P01019	-0.474515	0.474515	6.44981e-06	1.03318e-05	170	P01019	AGT	Angiotensinogen	ANGT_HUMAN	1	-28.0291	0.719709	Dengue	QC	NaN	NaN	NaN	73.9244	0.0839157
Dengue / QC	_MLADAPPQDPSC[Carbamidomethyl (C)]C[Carbamidomethyl (C)]SGALYYGSK_	P19823	0.328105	0.328105	6.50266e-06	1.04057e-05	176	P19823	ITIH2	Inter-alpha-trypsin inhibitor heavy chain H2	ITIH2_HUMAN	1	25.5363	1.25536	Dengue	QC	NaN	NaN	NaN	137.674	0.065545
Dengue / QC	_VQYEC[Carbamidomethyl (C)]ATGYYTAGGK_	P05160	0.108161	0.108161	6.55606e-06	1.04853e-05	118	P05160	F13B	Coagulation factor XIII B chain	F13B_HUMAN	1	7.78534	1.07785	Dengue	QC	NaN	NaN	NaN	88.1881	0.0677571
Dengue / QC	_RGDAC[Carbamidomethyl (C)]EGDSGGPFVMK_	P00734	0.448932	0.448932	6.60039e-06	1.05473e-05	100	P00734	F2	Prothrombin	THRB_HUMAN	1	36.5029	1.36503	Dengue	QC	NaN	NaN	NaN	82.2173	0.115193
Dengue / QC	_GHFSISIPVK_	P01023	-0.420152	0.420152	6.63255e-06	1.05957e-05	176	P01023	A2M	Alpha-2-macroglobulin	A2MG_HUMAN	1	-25.2654	0.747346	Dengue	QC	NaN	NaN	NaN	113.208	0.0856151
Dengue / QC	_DGTVTTDWK_	P04275	0.644724	0.644724	6.71725e-06	1.07189e-05	76	P04275	VWF	von Willebrand factor	VWF_HUMAN	1	56.344	1.56344	Dengue	QC	NaN	NaN	NaN	66.3246	0.139684
Dengue / QC	_YVYIAELLAHK_	P27169	0.296362	0.296362	6.747e-06	1.07604e-05	108	P27169	PON1	Serum paraoxonase/arylesterase 1	PON1_HUMAN	1	22.8044	1.22804	Dengue	QC	NaN	NaN	NaN	84.8729	0.09085
Dengue / QC	_VFSNGADLSGVTEEAPLK_	P01009	-0.530399	0.530399	7.00652e-06	1.11305e-05	168	P01009	SERPINA1	Alpha-1-antitrypsin	A1AT_HUMAN	1	-30.7637	0.692363	Dengue	QC	NaN	NaN	NaN	105.184	0.0960201
Dengue / QC	_ANRPFLVFIR_	P01008	-0.359265	0.359265	7.01534e-06	1.11414e-05	168	P01008	SERPINC1	Antithrombin-III	ANT3_HUMAN	1	-22.0438	0.779562	Dengue	QC	NaN	NaN	NaN	84.9294	0.0700715
Dengue / QC	_INENTGSVSVTR_	P55290;P55290-4	0.567976	0.567976	7.20958e-06	1.14371e-05	98	P55290;P55290-4	CDH13	Cadherin-13;Isoform 4 of Cadherin-13	CAD13_HUMAN	1	48.2442	1.48244	Dengue	QC	NaN	NaN	NaN	28.0272	0.162307
Dengue / QC	_AALTELSLGSAYQAMILGVDSK_	P04114	1.21483	1.21483	7.24019e-06	1.14761e-05	46	P04114	APOB	Apolipoprotein B-100	APOB_HUMAN	1	132.114	2.32114	Dengue	QC	NaN	NaN	NaN	5.11369	0.139776
Dengue / QC	_LSFVKVDSHFR_	P01023	-0.713414	0.713414	7.25543e-06	1.1497e-05	170	P01023	A2M	Alpha-2-macroglobulin	A2MG_HUMAN	1	-39.0125	0.609875	Dengue	QC	NaN	NaN	NaN	44.6755	0.150589
Dengue / QC	_QQNAQGGFSSTQDTVVALHALSK_	P01023	-0.41915	0.41915	7.27836e-06	1.15302e-05	176	P01023	A2M	Alpha-2-macroglobulin	A2MG_HUMAN	1	-25.2135	0.747865	Dengue	QC	NaN	NaN	NaN	80.6917	0.0815663
Dengue / QC	_ALDLINK_	P04196	-0.643401	0.643401	7.50628e-06	1.18549e-05	152	P04196	HRG	Histidine-rich glycoprotein	HRG_HUMAN	1	-35.9798	0.640202	Dengue	QC	NaN	NaN	NaN	27.9947	0.105492
Dengue / QC	_KGGVASGFKHVVPNEVVVQR_	P06396	0.638696	0.638696	7.57023e-06	1.19526e-05	86	P06396	GSN	Gelsolin	GELS_HUMAN	1	55.6922	1.55692	Dengue	QC	NaN	NaN	NaN	22.705	0.165958
Dengue / QC	_ISEITNIVSK_	P20742	2.92684	2.92684	7.67104e-06	1.21007e-05	52	P20742	PZP	Pregnancy zone protein	PZP_HUMAN	1	660.443	7.60443	Dengue	QC	NaN	NaN	NaN	40.0455	0.520041
Dengue / QC	_VSNGAGTMSVSLVADENPFAQGALK_	P06396	0.474092	0.474092	7.70734e-06	1.21521e-05	136	P06396	GSN	Gelsolin	GELS_HUMAN	1	38.9043	1.38904	Dengue	QC	NaN	NaN	NaN	59.7286	0.0701614
Dengue / QC	_YISKYELDK_	P01024	-0.294425	0.294425	7.7684e-06	1.22416e-05	162	P01024	C3	Complement C3	CO3_HUMAN	1	-18.4603	0.815397	Dengue	QC	NaN	NaN	NaN	105.887	0.0756197
Dengue / QC	_FQVDNNNRLLLQQVSLPELPGEYSMK_	P01023	0.922137	0.922137	7.77584e-06	1.22466e-05	152	P01023	A2M	Alpha-2-macroglobulin	A2MG_HUMAN	1	89.492	1.89492	Dengue	QC	NaN	NaN	NaN	95.9795	0.1248
Dengue / QC	_LPPNVVEESAR_	P01023	-0.431273	0.431273	7.8563e-06	1.2363e-05	176	P01023	A2M	Alpha-2-macroglobulin	A2MG_HUMAN	1	-25.8393	0.741607	Dengue	QC	NaN	NaN	NaN	71.3714	0.0900045
Dengue / QC	_SHC[Carbamidomethyl (C)]IAEVENDEMPADLPSLAADFVESKDVC[Carbamidomethyl (C)]KNYAEAK_	P02768	1.38115	1.38115	7.8894e-06	1.24082e-05	130	P02768	ALB	Serum albumin	ALBU_HUMAN	1	160.476	2.60476	Dengue	QC	NaN	NaN	NaN	108.487	0.284175
Dengue / QC	_LYLQMSTHGK_	A0A0C4DFP6;Q9NQ79;Q9NQ79-2	1.23532	1.23532	7.89607e-06	1.24153e-05	42	A0A0C4DFP6;Q9NQ79;Q9NQ79-2	CRTAC1	Cartilage acidic protein 1;Cartilage acidic protein 1;Isoform 2 of Cartilage acidic protein 1	A0A0C4DFP6_HUMAN;CRAC1_HUMAN;CRAC1_HUMAN	1	135.434	2.35434	Dengue	QC	NaN	NaN	NaN	9.60724	0.124108
Dengue / QC	_EGFGHLSPTGTTEFWLGNEK_	P02679	1.53512	1.53512	7.97133e-06	1.25232e-05	122	P02679	FGG	Fibrinogen gamma chain	FIBG_HUMAN	1	189.812	2.89812	Dengue	QC	NaN	NaN	NaN	114.519	0.276496
Dengue / QC	_ENQLEVLEVSWLHGLK_	P02750	0.438715	0.438715	7.9778e-06	1.25299e-05	142	P02750	LRG1	Leucine-rich alpha-2-glycoprotein	A2GL_HUMAN	1	35.5396	1.3554	Dengue	QC	NaN	NaN	NaN	104.438	0.121495
Dengue / QC	_FISLGEAC[Carbamidomethyl (C)]K_	P01024	0.411679	0.411679	8.03091e-06	1.26099e-05	120	P01024	C3	Complement C3	CO3_HUMAN	1	33.0233	1.33023	Dengue	QC	NaN	NaN	NaN	102.425	0.0950901
Dengue / QC	_IIC[Carbamidomethyl (C)]DNTGITTVSK_	P05164;P05164-2;P05164-3	0.747402	0.747402	8.05107e-06	1.2631e-05	78	P05164;P05164-2;P05164-3	MPO	Myeloperoxidase;Isoform H14 of Myeloperoxidase;Isoform H7 of Myeloperoxidase	PERM_HUMAN	1	67.8767	1.67877	Dengue	QC	NaN	NaN	NaN	56.8517	0.163779
Dengue / QC	_VDAFC[Carbamidomethyl (C)]GGSIVNEK_	P00740	0.3538	0.3538	8.09799e-06	1.26942e-05	100	P00740	F9	Coagulation factor IX	FA9_HUMAN	1	27.7922	1.27792	Dengue	QC	NaN	NaN	NaN	80.711	0.0764693
Dengue / QC	_DSDWPFC[Carbamidomethyl (C)]SDEDWNYKC[Carbamidomethyl (C)]PSGC[Carbamidomethyl (C)]R_	P02671	1.52506	1.52506	8.13501e-06	1.27416e-05	42	P02671	FGA	Fibrinogen alpha chain	FIBA_HUMAN	1	187.798	2.87798	Dengue	QC	NaN	NaN	NaN	32.8382	0.21424
Dengue / QC	_LADFALLC[Carbamidomethyl (C)]LDGK_	E7ER44;P02788	1.02084	1.02084	8.15741e-06	1.27732e-05	62	E7ER44;P02788	LTF	Lactotransferrin	E7ER44_HUMAN;TRFL_HUMAN	1	102.911	2.02911	Dengue	QC	NaN	NaN	NaN	47.4332	0.22916
Dengue / QC	_C[Carbamidomethyl (C)]QC[Carbamidomethyl (C)]DELC[Carbamidomethyl (C)]SYYQSC[Carbamidomethyl (C)]C[Carbamidomethyl (C)]TDYTAEC[Carbamidomethyl (C)]KPQVTR_	P04004	0.35763	0.35763	8.16007e-06	1.27738e-05	176	P04004	VTN	Vitronectin	VTNC_HUMAN	1	28.1319	1.28132	Dengue	QC	NaN	NaN	NaN	93.1994	0.0641526
Dengue / QC	_VKIDQTVEELR_	P06727	1.96847	1.96847	8.20491e-06	1.28299e-05	24	P06727	APOA4	Apolipoprotein A-IV	APOA4_HUMAN	1	291.354	3.91354	Dengue	QC	NaN	NaN	NaN	18.0022	0.282194
Dengue / QC	_VSNWDSGVPDR_	A0A075B6S6	0.443398	0.443398	8.22351e-06	1.28555e-05	56	A0A075B6S6	IGKV2D-30	Immunoglobulin kappa variable 2D-30	KVD30_HUMAN	1	35.9803	1.3598	Dengue	QC	NaN	NaN	NaN	41.5754	0.118284
Dengue / QC	_LTITKDTSK_	P01817	-1.03763	1.03763	8.27921e-06	1.2939e-05	86	P01817	IGHV2-5	Immunoglobulin heavy variable 2-5	HV205_HUMAN	1	-51.2871	0.487129	Dengue	QC	NaN	NaN	NaN	18.1239	0.179152
Dengue / QC	_SC[Carbamidomethyl (C)]DIPVFM[Oxidation (M)]NAR_	P08603	0.790624	0.790624	8.29296e-06	1.29569e-05	116	P08603	CFH	Complement factor H	CFAH_HUMAN	1	72.9822	1.72982	Dengue	QC	NaN	NaN	NaN	109.611	0.161853
Dengue / QC	_QAGLGNHLSGSER_	Q15582	0.868784	0.868784	8.39878e-06	1.31114e-05	36	Q15582	TGFBI	Transforming growth factor-beta-induced protein ig-h3	BGH3_HUMAN	1	82.6123	1.82612	Dengue	QC	NaN	NaN	NaN	18.7645	0.1696
Dengue / QC	_DNPMYYC[Carbamidomethyl (C)]NKK_	O75882;O75882-2	0.397975	0.397975	8.42585e-06	1.31501e-05	122	O75882;O75882-2	ATRN	Attractin;Isoform 2 of Attractin	ATRN_HUMAN	1	31.7657	1.31766	Dengue	QC	NaN	NaN	NaN	56.7123	0.0861477
Dengue / QC	_LVFQQFDLEPSEGC[Carbamidomethyl (C)]FYDYVK_	B4DPQ0	0.890949	0.890949	8.44786e-06	1.31808e-05	112	B4DPQ0	C1R	Complement C1r subcomponent	B4DPQ0_HUMAN	1	85.4395	1.85439	Dengue	QC	NaN	NaN	NaN	59.712	0.158136
Dengue / QC	_IPKSDVVYTDWK_	P02763	1.12275	1.12275	8.4862e-06	1.32334e-05	32	P02763	ORM1	Alpha-1-acid glycoprotein 1	A1AG1_HUMAN	1	117.762	2.17762	Dengue	QC	NaN	NaN	NaN	25.7602	0.165657
Dengue / QC	_GFQVVVTLR_	P09871	0.692451	0.692451	8.48889e-06	1.32339e-05	120	P09871	C1S	Complement C1s subcomponent	C1S_HUMAN	1	61.6027	1.61603	Dengue	QC	NaN	NaN	NaN	63.3808	0.152065
Dengue / QC	_ADYEKHKVYAC[Carbamidomethyl (C)]EVTHQGLSSPVTK_	P01834	2.40694	2.40694	8.51825e-06	1.32724e-05	132	P01834	IGKC	Immunoglobulin kappa constant	IGKC_HUMAN	1	430.347	5.30347	Dengue	QC	NaN	NaN	NaN	91.1138	0.456771
Dengue / QC	_DGAGDVAFVK_	P02787	-0.330999	0.330999	8.55703e-06	1.33219e-05	176	P02787	TF	Serotransferrin	TRFE_HUMAN	1	-20.5014	0.794986	Dengue	QC	NaN	NaN	NaN	67.3248	0.072115
Dengue / QC	_VDVQAGAC[Carbamidomethyl (C)]EGKLELSVDGAK_	P0C0L5	0.835489	0.835489	8.64156e-06	1.34424e-05	134	P0C0L5	C4B	Complement C4-B	CO4B_HUMAN	1	78.4462	1.78446	Dengue	QC	NaN	NaN	NaN	103.134	0.157345
Dengue / QC	_HTFMGVVSLGSPSGEVSHPRK_	P02765	1.71991	1.71991	8.67071e-06	1.34767e-05	42	P02765	AHSG	Alpha-2-HS-glycoprotein	FETUA_HUMAN	1	229.415	3.29415	Dengue	QC	NaN	NaN	NaN	29.1678	0.281649
Dengue / QC	_KEDSC[Carbamidomethyl (C)]QLGYSAGPC[Carbamidomethyl (C)]MGM[Oxidation (M)]TSR_	P02760	1.0529	1.0529	8.99537e-06	1.3947e-05	24	P02760	AMBP	Protein AMBP	AMBP_HUMAN	1	107.47	2.0747	Dengue	QC	NaN	NaN	NaN	19.2068	0.1819
Dengue / QC	_EC[Carbamidomethyl (C)]SKLPLRITYYHLSFPTNIQAPAVVFR_	P23142-4	1.22763	1.22763	9.03756e-06	1.39971e-05	56	P23142-4	FBLN1	Isoform C of Fibulin-1	FBLN1_HUMAN	1	134.182	2.34182	Dengue	QC	NaN	NaN	NaN	48.2434	0.219131
Dengue / QC	_AEAQAQYSAAVAK_	Q14624	-0.495134	0.495134	9.14994e-06	1.41558e-05	176	Q14624	ITIH4	Inter-alpha-trypsin inhibitor heavy chain H4	ITIH4_HUMAN	1	-29.0504	0.709496	Dengue	QC	NaN	NaN	NaN	45.4044	0.110943
Dengue / QC	_YIYGKPVQGVAYVR_	P0C0L5	-0.336402	0.336402	9.16604e-06	1.41768e-05	176	P0C0L5	C4B	Complement C4-B	CO4B_HUMAN	1	-20.7986	0.792014	Dengue	QC	NaN	NaN	NaN	103.774	0.063257
Dengue / QC	_TQFNNNEYSQDLDAYNTKDKIGVELTGR_	P04114	0.566557	0.566557	9.29874e-06	1.43586e-05	138	P04114	APOB	Apolipoprotein B-100	APOB_HUMAN	1	48.0985	1.48099	Dengue	QC	NaN	NaN	NaN	120.395	0.144787
Dengue / QC	_EVEGQILGTYVC[Carbamidomethyl (C)]IK_	P20851;P20851-2	0.59884	0.59884	9.30304e-06	1.43613e-05	152	P20851;P20851-2	C4BPB	C4b-binding protein beta chain;Isoform 2 of C4b-binding protein beta chain	C4BPB_HUMAN	1	51.4498	1.5145	Dengue	QC	NaN	NaN	NaN	92.3677	0.111015
Dengue / QC	_SNLC[Carbamidomethyl (C)]ALC[Carbamidomethyl (C)]IGDEQGENKC[Carbamidomethyl (C)]VPNSNER_	E7ER44;P02788	1.49788	1.49788	9.33994e-06	1.44105e-05	20	E7ER44;P02788	LTF	Lactotransferrin	E7ER44_HUMAN;TRFL_HUMAN	1	182.426	2.82426	Dengue	QC	NaN	NaN	NaN	14.7692	0.267425
Dengue / QC	_ILLDEQAQWK_	J3QQR8;J3QQX6;J3QRQ1;P13598	1.66232	1.66232	9.43104e-06	1.45431e-05	10	J3QQR8;J3QQX6;J3QRQ1;P13598	ICAM2	Intercellular adhesion molecule 2 (Fragment);Intercellular adhesion molecule 2 (Fragment);Intercellular adhesion molecule 2 (Fragment);Intercellular adhesion molecule 2	J3QQR8_HUMAN;J3QQX6_HUMAN;J3QRQ1_HUMAN;ICAM2_HUMAN	1	216.525	3.16525	Dengue	QC	NaN	NaN	NaN	5.09394	0.102452
Dengue / QC	_VLSPADKTNVK_	P69905	0.624596	0.624596	9.44101e-06	1.45506e-05	174	P69905	HBA1	Hemoglobin subunit alpha	HBA_HUMAN	1	54.1779	1.54178	Dengue	QC	NaN	NaN	NaN	156.96	0.149192
Dengue / QC	_SGNTFRPEVHLLPPPSEELALNELVTLTC[Carbamidomethyl (C)]LAR_	A0A0G2JMB2	0.833211	0.833211	9.44025e-06	1.45506e-05	176	A0A0G2JMB2	IGHA2	Immunoglobulin heavy constant alpha 2 (Fragment)	A0A0G2JMB2_HUMAN	1	78.1646	1.78165	Dengue	QC	NaN	NaN	NaN	154.049	0.177127
Dengue / QC	_MFPGVPLDTHDVFQYR_	P14780	2.57274	2.57274	9.48286e-06	1.45993e-05	22	P14780	MMP9	Matrix metalloproteinase-9	MMP9_HUMAN	1	494.938	5.94938	Dengue	QC	NaN	NaN	NaN	10.7201	0.370509
Dengue / QC	_GSFALSFPVESDVAPIAR_	P20742	1.27466	1.27466	9.52762e-06	1.46603e-05	122	P20742	PZP	Pregnancy zone protein	PZP_HUMAN	1	141.942	2.41942	Dengue	QC	NaN	NaN	NaN	89.2044	0.280062
Dengue / QC	_LAAYLM[Oxidation (M)]LMR_	P04114	0.349936	0.349936	9.73518e-06	1.49533e-05	26	P04114	APOB	Apolipoprotein B-100	APOB_HUMAN	1	27.4504	1.2745	Dengue	QC	NaN	NaN	NaN	18.7382	0.106228
Dengue / QC	_DSLEFREIGELYLPK_	P01011	1.04528	1.04528	9.73824e-06	1.49533e-05	50	P01011	SERPINA3	Alpha-1-antichymotrypsin	AACT_HUMAN	1	106.376	2.06376	Dengue	QC	NaN	NaN	NaN	38.1754	0.155375
Dengue / QC	_NAEELKAR_	P06727	0.922891	0.922891	9.79406e-06	1.50255e-05	60	P06727	APOA4	Apolipoprotein A-IV	APOA4_HUMAN	1	89.5911	1.89591	Dengue	QC	NaN	NaN	NaN	33.157	0.211393
Dengue / QC	_VTKC[Carbamidomethyl (C)]C[Carbamidomethyl (C)]TESLVNR_	P02768	0.889171	0.889171	9.80353e-06	1.5036e-05	120	P02768	ALB	Serum albumin	ALBU_HUMAN	1	85.2112	1.85211	Dengue	QC	NaN	NaN	NaN	61.0769	0.14302
Dengue / QC	_AEDM[Oxidation (M)]AVYYC[Carbamidomethyl (C)]TR_	A0A075B7E8	1.56688	1.56688	9.91836e-06	1.51998e-05	130	A0A075B7E8	IGHV3OR16-13	Immunoglobulin heavy variable 3/OR16-13 (non-functional) (Fragment)	A0A075B7E8_HUMAN	1	196.264	2.96264	Dengue	QC	NaN	NaN	NaN	71.3598	0.277512
Dengue / QC	_KC[Carbamidomethyl (C)]C[Carbamidomethyl (C)]YDGAC[Carbamidomethyl (C)]VNNDETC[Carbamidomethyl (C)]EQR_	P01031	0.598267	0.598267	1.00071e-05	1.53275e-05	58	P01031	C5	Complement C5	CO5_HUMAN	1	51.3897	1.5139	Dengue	QC	NaN	NaN	NaN	29.5636	0.113415
Dengue / QC	_AAPSVTLFPPSSEELQANK_	P0DOY2	-0.450308	0.450308	1.00285e-05	1.53478e-05	176	P0DOY2	IGLC2	Immunoglobulin lambda constant 2	IGLC2_HUMAN	1	-26.8113	0.731887	Dengue	QC	NaN	NaN	NaN	86.3562	0.0885261
Dengue / QC	_ASQSISSWLAWYQQKPGKAPK_	P01602	-0.761117	0.761117	1.01439e-05	1.55119e-05	176	P01602	IGKV1-5	Immunoglobulin kappa variable 1-5	KV105_HUMAN	1	-40.9961	0.590039	Dengue	QC	NaN	NaN	NaN	48.9833	0.160105
Dengue / QC	_VVWC[Carbamidomethyl (C)]AVGEQELR_	E7ER44;P02788	1.14042	1.14042	1.031e-05	1.57448e-05	66	E7ER44;P02788	LTF	Lactotransferrin	E7ER44_HUMAN;TRFL_HUMAN	1	120.445	2.20445	Dengue	QC	NaN	NaN	NaN	43.3969	0.228635
Dengue / QC	_SSFQVTTC[Carbamidomethyl (C)]K_	P03950	1.01366	1.01366	1.03323e-05	1.57703e-05	72	P03950	ANG	Angiogenin	ANGI_HUMAN	1	101.902	2.01902	Dengue	QC	NaN	NaN	NaN	56.9262	0.149554
Dengue / QC	_ADQVC[Carbamidomethyl (C)]INLR_	Q12805;Q12805-2;Q12805-4	0.460399	0.460399	1.04051e-05	1.5873e-05	166	Q12805;Q12805-2;Q12805-4	EFEMP1	EGF-containing fibulin-like extracellular matrix protein 1;Isoform 2 of EGF-containing fibulin-like extracellular matrix protein 1;Isoform 4 of EGF-containing fibulin-like extracellular matrix protein 1	FBLN3_HUMAN	1	37.5922	1.37592	Dengue	QC	NaN	NaN	NaN	156.206	0.107104
Dengue / QC	_FFSASC[Carbamidomethyl (C)]VPGADKGQFPNLC[Carbamidomethyl (C)]R_	E7ER44;P02788	1.50635	1.50635	1.04908e-05	1.59816e-05	44	E7ER44;P02788	LTF	Lactotransferrin	E7ER44_HUMAN;TRFL_HUMAN	1	184.09	2.8409	Dengue	QC	NaN	NaN	NaN	27.3184	0.252047
Dengue / QC	_ISTSLPVLDLIDAIQPGSINYDLLK_	P13796	0.529931	0.529931	1.06336e-05	1.61868e-05	60	P13796	LCP1	Plastin-2	PLSL_HUMAN	1	44.386	1.44386	Dengue	QC	NaN	NaN	NaN	54.7712	0.112447
Dengue / QC	_YDRLEIWDGFPDVGPHIGR_	E7EX60;E9PEP6;O14786;O14786-2;O14786-3;Q5JWQ6;Q5T7F0	0.813693	0.813693	1.06365e-05	1.61868e-05	34	E7EX60;E9PEP6;O14786;O14786-2;O14786-3;Q5JWQ6;Q5T7F0	NRP1	Neuropilin-1;Neuropilin;Neuropilin-1;Isoform 2 of Neuropilin-1;Isoform 3 of Neuropilin-1;Neuropilin;Neuropilin	E7EX60_HUMAN;E9PEP6_HUMAN;NRP1_HUMAN;NRP1_HUMAN;NRP1_HUMAN;Q5JWQ6_HUMAN;Q5T7F0_HUMAN	1	75.7704	1.7577	Dengue	QC	NaN	NaN	NaN	17.9633	0.211435
Dengue / QC	_ADLSGITGAR_	P01011	-0.328399	0.328399	1.06989e-05	1.62687e-05	176	P01011	SERPINA3	Alpha-1-antichymotrypsin	AACT_HUMAN	1	-20.358	0.79642	Dengue	QC	NaN	NaN	NaN	67.9568	0.0818358
Dengue / QC	_QKVLVNER_	P00739	1.13976	1.13976	1.07835e-05	1.63843e-05	74	P00739	HPR	Haptoglobin-related protein	HPTR_HUMAN	1	120.344	2.20344	Dengue	QC	NaN	NaN	NaN	35.2368	0.157687
Dengue / QC	_NQGILEFYGDDIALLK_	B4E1Z4	1.07975	1.07975	1.07925e-05	1.63935e-05	38	B4E1Z4	NaN	cDNA FLJ55673, highly similar to Complement factor B (EC 3.4.21.47)	B4E1Z4_HUMAN	1	111.367	2.11367	Dengue	QC	NaN	NaN	NaN	12.1381	0.114997
Dengue / QC	_LLGMETMAWQEIR_	B4E1Z4	0.674402	0.674402	1.08021e-05	1.63993e-05	66	B4E1Z4	NaN	cDNA FLJ55673, highly similar to Complement factor B (EC 3.4.21.47)	B4E1Z4_HUMAN	1	59.5935	1.59594	Dengue	QC	NaN	NaN	NaN	53.0628	0.131211
Dengue / QC	_ISGLIYEETR_	P62805	1.79685	1.79685	1.09197e-05	1.65557e-05	28	P62805	HIST1H4A	Histone H4	H4_HUMAN	1	247.46	3.4746	Dengue	QC	NaN	NaN	NaN	15.3971	0.313198
Dengue / QC	_C[Carbamidomethyl (C)]C[Carbamidomethyl (C)]AAADPHEC[Carbamidomethyl (C)]YAKVFDEFKPLVEEPQNLIK_	P02768	1.14673	1.14673	1.09592e-05	1.66068e-05	40	P02768	ALB	Serum albumin	ALBU_HUMAN	1	121.412	2.21412	Dengue	QC	NaN	NaN	NaN	13.8305	0.373529
Dengue / QC	_KAPDAGGC[Carbamidomethyl (C)]LHADPDLGVLC[Carbamidomethyl (C)]PTGC[Carbamidomethyl (C)]QLQEALLQQERPIR_	P02675	1.70372	1.70372	1.10224e-05	1.66937e-05	124	P02675	FGB	Fibrinogen beta chain	FIBB_HUMAN	1	225.74	3.2574	Dengue	QC	NaN	NaN	NaN	113.09	0.362226
Dengue / QC	_YAASSYLSLTPEQWKSHR_	P0DOY2	0.397589	0.397589	1.11182e-05	1.68299e-05	162	P0DOY2	IGLC2	Immunoglobulin lambda constant 2	IGLC2_HUMAN	1	31.7304	1.3173	Dengue	QC	NaN	NaN	NaN	148.279	0.110383
Dengue / QC	_LLIYAASTLQSGVPSR_	A0A0C4DH67	-0.587265	0.587265	1.11917e-05	1.6923e-05	154	A0A0C4DH67	IGKV1-8	Immunoglobulin kappa variable 1-8	KV108_HUMAN	1	-33.4397	0.665603	Dengue	QC	NaN	NaN	NaN	83.7328	0.111559
Dengue / QC	_C[Carbamidomethyl (C)]AFSSQEPYFSYSGAFK_	E7ER44;P02788	0.982357	0.982357	1.12828e-05	1.70335e-05	28	E7ER44;P02788	LTF	Lactotransferrin	E7ER44_HUMAN;TRFL_HUMAN	1	97.5691	1.97569	Dengue	QC	NaN	NaN	NaN	21.7051	0.174999
Dengue / QC	_EVTKEVVTSEDGSDC[Carbamidomethyl (C)]PEAMDLGTLSGIGTLDGFR_	P02671	2.4977	2.4977	1.13863e-05	1.71853e-05	54	P02671	FGA	Fibrinogen alpha chain	FIBA_HUMAN	1	464.783	5.64783	Dengue	QC	NaN	NaN	NaN	41.8325	0.398526
Dengue / QC	_ENYLLPEAK_	Q9BXR6	0.281257	0.281257	1.15881e-05	1.74759e-05	62	Q9BXR6	CFHR5	Complement factor H-related protein 5	FHR5_HUMAN	1	21.5253	1.21525	Dengue	QC	NaN	NaN	NaN	55.2786	0.0968129
Dengue / QC	_YKEENDDFASFR_	P04196	-0.238464	0.238464	1.18979e-05	1.79052e-05	176	P04196	HRG	Histidine-rich glycoprotein	HRG_HUMAN	1	-15.2352	0.847648	Dengue	QC	NaN	NaN	NaN	70.5267	0.0556063
Dengue / QC	_LLFDGDAHLLMSIPSPFR_	Q9Y6R7	1.27508	1.27508	1.21272e-05	1.82164e-05	24	Q9Y6R7	FCGBP	IgGFc-binding protein	FCGBP_HUMAN	1	142.013	2.42013	Dengue	QC	NaN	NaN	NaN	8.77288	0.36505
Dengue / QC	_TDASDVKPC[Carbamidomethyl (C)]_	P02749	0.531127	0.531127	1.21366e-05	1.82257e-05	98	P02749	APOH	Beta-2-glycoprotein 1	APOH_HUMAN	1	44.5058	1.44506	Dengue	QC	NaN	NaN	NaN	75.092	0.11339
Dengue / QC	_LNHQLEGLTFQMK_	P06727	0.377845	0.377845	1.21614e-05	1.82534e-05	128	P06727	APOA4	Apolipoprotein A-IV	APOA4_HUMAN	1	29.94	1.2994	Dengue	QC	NaN	NaN	NaN	120.976	0.0815693
Dengue / QC	_VASYAAWIDSVLA_	K7ERG9;P00746	0.769042	0.769042	1.24109e-05	1.86081e-05	140	K7ERG9;P00746	CFD	Complement factor D	K7ERG9_HUMAN;CFAD_HUMAN	1	70.4138	1.70414	Dengue	QC	NaN	NaN	NaN	131.586	0.149884
Dengue / QC	_LRYTTEIIK_	B4DPQ0	1.03689	1.03689	1.2587e-05	1.88425e-05	38	B4DPQ0	C1R	Complement C1r subcomponent	B4DPQ0_HUMAN	1	105.18	2.0518	Dengue	QC	NaN	NaN	NaN	9.00063	0.183939
Dengue / QC	_SGTHTLPVESGDMK_	P20742	3.12377	3.12377	1.26079e-05	1.88637e-05	94	P20742	PZP	Pregnancy zone protein	PZP_HUMAN	1	771.665	8.71665	Dengue	QC	NaN	NaN	NaN	66.5092	0.613586
Dengue / QC	_VAEGTQVLELPFKGDDITM[Oxidation (M)]VLILPKPEK_	P01008	0.496766	0.496766	1.26422e-05	1.89003e-05	160	P01008	SERPINC1	Antithrombin-III	ANT3_HUMAN	1	41.1047	1.41105	Dengue	QC	NaN	NaN	NaN	102.655	0.192303
Dengue / QC	_NGVAQEPVHLDSPAIKHQFLLTGDTQGR_	P04217	0.760049	0.760049	1.28214e-05	1.91379e-05	166	P04217	A1BG	Alpha-1B-glycoprotein	A1BG_HUMAN	1	69.3548	1.69355	Dengue	QC	NaN	NaN	NaN	159.873	0.141718
Dengue / QC	_AYSDMREANYIGSDK_	P0DJI8	0.959595	0.959595	1.29318e-05	1.92833e-05	40	P0DJI8	SAA1	Serum amyloid A-1 protein	SAA1_HUMAN	1	94.4763	1.94476	Dengue	QC	NaN	NaN	NaN	32.7033	0.206381
Dengue / QC	_SLGNVIM[Oxidation (M)]VC[Carbamidomethyl (C)]R_	P08603	1.27502	1.27502	1.29403e-05	1.929e-05	42	P08603	CFH	Complement factor H	CFAH_HUMAN	1	142.001	2.42001	Dengue	QC	NaN	NaN	NaN	13.0417	0.177686
Dengue / QC	_YHFEALADTGISSEFYDNANDLLSK_	P07357	0.710148	0.710148	1.32034e-05	1.96615e-05	134	P07357	C8A	Complement component C8 alpha chain	CO8A_HUMAN	1	63.5972	1.63597	Dengue	QC	NaN	NaN	NaN	58.5404	0.129211
Dengue / QC	_YENC[Carbamidomethyl (C)]PKDNPMYYC[Carbamidomethyl (C)]NKK_	O75882;O75882-2	1.39774	1.39774	1.33173e-05	1.98208e-05	24	O75882;O75882-2	ATRN	Attractin;Isoform 2 of Attractin	ATRN_HUMAN	1	163.488	2.63488	Dengue	QC	NaN	NaN	NaN	10.5621	0.258278
Dengue / QC	_LLIYDNNKRPSGIPDR_	P01701	-0.425022	0.425022	1.34387e-05	1.9991e-05	164	P01701	IGLV1-51	Immunoglobulin lambda variable 1-51	LV151_HUMAN	1	-25.5173	0.744827	Dengue	QC	NaN	NaN	NaN	104.729	0.0931427
Dengue / QC	_QTLSWTVTPK_	P20742	2.33776	2.33776	1.34639e-05	2.00179e-05	98	P20742	PZP	Pregnancy zone protein	PZP_HUMAN	1	405.518	5.05518	Dengue	QC	NaN	NaN	NaN	49.7645	0.709718
Dengue / QC	_GGEGTGYFVDFSVR_	P04196	0.326058	0.326058	1.35187e-05	2.0089e-05	176	P04196	HRG	Histidine-rich glycoprotein	HRG_HUMAN	1	25.3584	1.25358	Dengue	QC	NaN	NaN	NaN	122.365	0.0726514
Dengue / QC	_NPDAEIRPWC[Carbamidomethyl (C)]YTMDPSVR_	P08519	0.537387	0.537387	1.35815e-05	2.01694e-05	66	P08519	LPA	Apolipoprotein(a)	APOA_HUMAN	1	45.1341	1.45134	Dengue	QC	NaN	NaN	NaN	39.0093	0.090078
Dengue / QC	_M[Oxidation (M)]TVTDQVNC[Carbamidomethyl (C)]PK_	P05090	0.40602	0.40602	1.36112e-05	2.02e-05	68	P05090	APOD	Apolipoprotein D	APOD_HUMAN	1	32.5026	1.32503	Dengue	QC	NaN	NaN	NaN	38.7267	0.145273
Dengue / QC	_NTLYLQMGSLR_	A0A075B6Q5	-0.597287	0.597287	1.38359e-05	2.05067e-05	96	A0A075B6Q5	IGHV3-64	Immunoglobulin heavy variable 3-64	HV364_HUMAN	1	-33.9004	0.660996	Dengue	QC	NaN	NaN	NaN	63.3743	0.117917
Dengue / QC	_IWDVVEK_	P01024	-0.267509	0.267509	1.38439e-05	2.05132e-05	176	P01024	C3	Complement C3	CO3_HUMAN	1	-16.9247	0.830753	Dengue	QC	NaN	NaN	NaN	58.2523	0.0572082
Dengue / QC	_EDPQTFYYAVAVVKK_	P02787	-0.25801	0.25801	1.39916e-05	2.07141e-05	176	P02787	TF	Serotransferrin	TRFE_HUMAN	1	-16.3759	0.836241	Dengue	QC	NaN	NaN	NaN	85.1966	0.0557004
Dengue / QC	_LGADM[Oxidation (M)]EDVC[Carbamidomethyl (C)]GR_	P02649	0.950624	0.950624	1.39941e-05	2.07141e-05	52	P02649	APOE	Apolipoprotein E	APOE_HUMAN	1	93.2709	1.93271	Dengue	QC	NaN	NaN	NaN	27.146	0.206003
Dengue / QC	_HSTIFENLANK_	P02787	-0.360168	0.360168	1.44237e-05	2.13001e-05	176	P02787	TF	Serotransferrin	TRFE_HUMAN	1	-22.0926	0.779074	Dengue	QC	NaN	NaN	NaN	84.7072	0.0705936
Dengue / QC	_AGFSWIEVTFKNPLVWVHASPEHVVVTR_	Q14624	0.630425	0.630425	1.46561e-05	2.15928e-05	152	Q14624	ITIH4	Inter-alpha-trypsin inhibitor heavy chain H4	ITIH4_HUMAN	1	54.8021	1.54802	Dengue	QC	NaN	NaN	NaN	86.3068	0.138791
Dengue / QC	_SLNPNRVTFK_	P01008	0.890666	0.890666	1.46611e-05	2.15946e-05	172	P01008	SERPINC1	Antithrombin-III	ANT3_HUMAN	1	85.4032	1.85403	Dengue	QC	NaN	NaN	NaN	149.469	0.16741
Dengue / QC	_RAPDLQDLPWQVK_	P22891;P22891-2	0.29204	0.29204	1.47927e-05	2.17546e-05	122	P22891;P22891-2	PROZ	Vitamin K-dependent protein Z;Isoform 2 of Vitamin K-dependent protein Z	PROZ_HUMAN	1	22.437	1.22437	Dengue	QC	NaN	NaN	NaN	105.929	0.0847504
Dengue / QC	_LVRPEVDVM[Oxidation (M)]C[Carbamidomethyl (C)]TAFHDNEETFLK_	P02768	-0.485183	0.485183	1.49639e-05	2.19837e-05	152	P02768	ALB	Serum albumin	ALBU_HUMAN	1	-28.5594	0.714406	Dengue	QC	NaN	NaN	NaN	48.137	0.0986947
Dengue / QC	_VESKY[Sulfation (Y)]GPPC[Carbamidomethyl (C)]PSC[Carbamidomethyl (C)]PAPEFLGGPSVFLFPPKPK_	P01861	0.00384187	0.00384187	1.51806e-05	2.2256e-05	108	P01861	IGHG4	Immunoglobulin heavy constant gamma 4	IGHG4_HUMAN	1	0.266653	1.00267	Dengue	QC	NaN	NaN	NaN	55.6043	0.335333
Dengue / QC	_EFNPLVIVGLSK_	A0A0A0MRJ7;P12259	0.630307	0.630307	1.53772e-05	2.25384e-05	92	A0A0A0MRJ7;P12259	F5	Coagulation factor V	A0A0A0MRJ7_HUMAN;FA5_HUMAN	1	54.7895	1.54789	Dengue	QC	NaN	NaN	NaN	36.1907	0.18466
Dengue / QC	_VGTGGIVGSK_	A0A0B4J1Y8	0.484181	0.484181	1.55305e-05	2.27397e-05	50	A0A0B4J1Y8	IGLV9-49	Immunoglobulin lambda variable 9-49	LV949_HUMAN	1	39.8792	1.39879	Dengue	QC	NaN	NaN	NaN	41.5646	0.125869
Dengue / QC	_NSLYLQMNSLK_	A0A0B4J1Y9	-0.365502	0.365502	1.56496e-05	2.28846e-05	158	A0A0B4J1Y9	IGHV3-72	Immunoglobulin heavy variable 3-72	HV372_HUMAN	1	-22.3801	0.776199	Dengue	QC	NaN	NaN	NaN	89.5155	0.0768057
Dengue / QC	_LRC[Carbamidomethyl (C)]NGDNDC[Carbamidomethyl (C)]GDFSDEDDC[Carbamidomethyl (C)]ESEPRPPC[Carbamidomethyl (C)]R_	P02748	0.657227	0.657227	1.56538e-05	2.28848e-05	114	P02748	C9	Complement component C9	CO9_HUMAN	1	57.7049	1.57705	Dengue	QC	NaN	NaN	NaN	57.9291	0.114283
Dengue / QC	_FPEVDVLTK_	P04114	-0.45686	0.45686	1.56714e-05	2.29047e-05	170	P04114	APOB	Apolipoprotein B-100	APOB_HUMAN	1	-27.143	0.72857	Dengue	QC	NaN	NaN	NaN	58.3839	0.0872177
Dengue / QC	_ESDTSYVSLKAPLTKPLK_	P02741	1.05247	1.05247	1.56796e-05	2.29108e-05	30	P02741	CRP	C-reactive protein	CRP_HUMAN	1	107.408	2.07408	Dengue	QC	NaN	NaN	NaN	23.1167	0.195278
Dengue / QC	_AEDTAVYYC[Carbamidomethyl (C)]AK_	A0A0J9YY99	-0.393671	0.393671	1.57199e-05	2.29578e-05	176	A0A0J9YY99	NaN	Uncharacterized protein (Fragment)	A0A0J9YY99_HUMAN	1	-23.881	0.76119	Dengue	QC	NaN	NaN	NaN	56.6732	0.0877331
Dengue / QC	_VQGVEFSHR_	P04114	0.549135	0.549135	1.5733e-05	2.29697e-05	98	P04114	APOB	Apolipoprotein B-100	APOB_HUMAN	1	46.3208	1.46321	Dengue	QC	NaN	NaN	NaN	78.5525	0.0950757
Dengue / QC	_SGVQM[Oxidation (M)]NTNFFHESGLEAHVALK_	P04114	0.447499	0.447499	1.60483e-05	2.33893e-05	52	P04114	APOB	Apolipoprotein B-100	APOB_HUMAN	1	36.3674	1.36367	Dengue	QC	NaN	NaN	NaN	10.9465	0.0955991
Dengue / QC	_GM[Oxidation (M)]C[Carbamidomethyl (C)]TSPPLIK_	P05160	0.0779988	0.0779988	1.60449e-05	2.33893e-05	20	P05160	F13B	Coagulation factor XIII B chain	F13B_HUMAN	1	5.55529	1.05555	Dengue	QC	NaN	NaN	NaN	7.36191	0.751673
Dengue / QC	_VLVDHFGYTKDDKHEQDMVNGIMLSVEK_	P04114	0.461734	0.461734	1.60607e-05	2.34015e-05	76	P04114	APOB	Apolipoprotein B-100	APOB_HUMAN	1	37.7196	1.3772	Dengue	QC	NaN	NaN	NaN	63.2261	0.122562
Dengue / QC	_DMYSFLEDM[Oxidation (M)]GLK_	P01023	0.83409	0.83409	1.61373e-05	2.34939e-05	66	P01023	A2M	Alpha-2-macroglobulin	A2MG_HUMAN	1	78.2732	1.78273	Dengue	QC	NaN	NaN	NaN	60.788	0.115759
Dengue / QC	_M[Oxidation (M)]C[Carbamidomethyl (C)]VDVNEC[Carbamidomethyl (C)]QR_	P23142	1.36748	1.36748	1.64044e-05	2.38472e-05	34	P23142	FBLN1	Fibulin-1	FBLN1_HUMAN	1	158.019	2.58019	Dengue	QC	NaN	NaN	NaN	17.9958	0.305293
Dengue / QC	_TGESVEFVC[Carbamidomethyl (C)]K_	P08603	0.4432	0.4432	1.64587e-05	2.392e-05	176	P08603	CFH	Complement factor H	CFAH_HUMAN	1	35.9617	1.35962	Dengue	QC	NaN	NaN	NaN	102.468	0.0813127
Dengue / QC	_SLAELGGHLDQQVEEFRR_	P06727	0.349306	0.349306	1.64649e-05	2.39229e-05	164	P06727	APOA4	Apolipoprotein A-IV	APOA4_HUMAN	1	27.3948	1.27395	Dengue	QC	NaN	NaN	NaN	155.673	0.0873032
Dengue / QC	_IVVVTAGVR_	P07195	-0.973769	0.973769	1.6613e-05	2.41197e-05	116	P07195	LDHB	L-lactate dehydrogenase B chain	LDHB_HUMAN	1	-49.0826	0.509174	Dengue	QC	NaN	NaN	NaN	100.146	0.207275
Dengue / QC	_C[Carbamidomethyl (C)]PC[Carbamidomethyl (C)]FHQGKEYAPGETVK_	P04275	-0.0555925	0.0555925	1.6819e-05	2.43937e-05	36	P04275	VWF	von Willebrand factor	VWF_HUMAN	1	-3.78008	0.962199	Dengue	QC	NaN	NaN	NaN	13.7743	0.737659
Dengue / QC	_QINSYVK_	P08185	0.76579	0.76579	1.68331e-05	2.4408e-05	52	P08185	SERPINA6	Corticosteroid-binding globulin	CBG_HUMAN	1	70.0301	1.7003	Dengue	QC	NaN	NaN	NaN	23.6523	0.123934
Dengue / QC	_IVDLVKELDRDTVFALVNYIFFK_	P01009	2.07824	2.07824	1.68456e-05	2.442e-05	26	P01009	SERPINA1	Alpha-1-antitrypsin	A1AT_HUMAN	1	322.292	4.22292	Dengue	QC	NaN	NaN	NaN	20.2411	0.381835
Dengue / QC	_M[Oxidation (M)]NFRPGVLSSR_	Q14624	2.97797	2.97797	1.68615e-05	2.44368e-05	84	Q14624	ITIH4	Inter-alpha-trypsin inhibitor heavy chain H4	ITIH4_HUMAN	1	687.878	7.87878	Dengue	QC	NaN	NaN	NaN	43.676	0.27751
Dengue / QC	_IAYKNWETEITAQPDGGKTENC[Carbamidomethyl (C)]AVLSGAANGK_	E9PHK0;P05452	0.740761	0.740761	1.69551e-05	2.45599e-05	78	E9PHK0;P05452	CLEC3B	Tetranectin	E9PHK0_HUMAN;TETN_HUMAN	1	67.1057	1.67106	Dengue	QC	NaN	NaN	NaN	53.163	0.133293
Dengue / QC	_KLSSWVLLMK_	P01009	-0.32977	0.32977	1.69629e-05	2.45648e-05	164	P01009	SERPINA1	Alpha-1-antitrypsin	A1AT_HUMAN	1	-20.4337	0.795663	Dengue	QC	NaN	NaN	NaN	136.599	0.0781692
Dengue / QC	_AGNNMLLVGVHGPR_	P21333;P21333-2;Q5HY54	0.422281	0.422281	1.71993e-05	2.48882e-05	90	P21333;P21333-2;Q5HY54	FLNA	Filamin-A;Isoform 2 of Filamin-A;Filamin-A	FLNA_HUMAN;FLNA_HUMAN;Q5HY54_HUMAN	1	34.0044	1.34004	Dengue	QC	NaN	NaN	NaN	80.7335	0.0951027
Dengue / QC	_QIKKQTALVELVK_	P02768	1.29257	1.29257	1.73998e-05	2.51655e-05	174	P02768	ALB	Serum albumin	ALBU_HUMAN	1	144.964	2.44964	Dengue	QC	NaN	NaN	NaN	160.541	0.253398
Dengue / QC	_C[Carbamidomethyl (C)]C[Carbamidomethyl (C)]HC[Carbamidomethyl (C)]C[Carbamidomethyl (C)]LLGR_	P23142	1.32137	1.32137	1.74303e-05	2.52033e-05	78	P23142	FBLN1	Fibulin-1	FBLN1_HUMAN	1	149.903	2.49903	Dengue	QC	NaN	NaN	NaN	71.8667	0.296755
Dengue / QC	_ELSHLPSLYDYSAYRR_	P10643	0.363278	0.363278	1.76049e-05	2.54362e-05	30	P10643	C7	Complement component C7	CO7_HUMAN	1	28.6345	1.28635	Dengue	QC	NaN	NaN	NaN	25.4277	0.111362
Dengue / QC	_HQTVPQNTGGKNPDPWAK_	P02787	-0.353082	0.353082	1.77141e-05	2.55876e-05	176	P02787	TF	Serotransferrin	TRFE_HUMAN	1	-21.709	0.78291	Dengue	QC	NaN	NaN	NaN	66.6388	0.0842916
Dengue / QC	_EEQFNSTYR_	P01861	1.21154	1.21154	1.79102e-05	2.58379e-05	24	P01861	IGHG4	Immunoglobulin heavy constant gamma 4	IGHG4_HUMAN	1	131.586	2.31586	Dengue	QC	NaN	NaN	NaN	13.4947	0.225795
Dengue / QC	_GHM[Oxidation (M)]LENHVER_	P19827	1.07632	1.07632	1.82004e-05	2.62233e-05	16	P19827	ITIH1	Inter-alpha-trypsin inhibitor heavy chain H1	ITIH1_HUMAN	1	110.865	2.10865	Dengue	QC	NaN	NaN	NaN	10.2566	0.136398
Dengue / QC	_YDSTC[Carbamidomethyl (C)]ER_	P07357	0.642023	0.642023	1.8874e-05	2.70909e-05	122	P07357	C8A	Complement component C8 alpha chain	CO8A_HUMAN	1	56.0515	1.56052	Dengue	QC	NaN	NaN	NaN	44.6022	0.126906
Dengue / QC	_MEEM[Oxidation (M)]GSR_	P02649	1.19474	1.19474	1.9008e-05	2.72626e-05	26	P02649	APOE	Apolipoprotein E	APOE_HUMAN	1	128.903	2.28903	Dengue	QC	NaN	NaN	NaN	20.7583	0.197486
Dengue / QC	_WYNDYAVSVK_	A0A0B4J1U7	0.358924	0.358924	1.90395e-05	2.7294e-05	60	A0A0B4J1U7	IGHV6-1	Immunoglobulin heavy variable 6-1	HV601_HUMAN	1	28.2469	1.28247	Dengue	QC	NaN	NaN	NaN	50.3125	0.147982
Dengue / QC	_EAAC[Carbamidomethyl (C)]VWC[Carbamidomethyl (C)]NGEEYR_	G3XAK1;P26927	0.600522	0.600522	1.92034e-05	2.74942e-05	38	G3XAK1;P26927	MST1	Hepatocyte growth factor-like protein	G3XAK1_HUMAN;HGFL_HUMAN	1	51.6266	1.51627	Dengue	QC	NaN	NaN	NaN	18.6357	0.138992
Dengue / QC	_MESLGITSR_	P07357	-0.261239	0.261239	1.9214e-05	2.75025e-05	176	P07357	C8A	Complement component C8 alpha chain	CO8A_HUMAN	1	-16.5629	0.834371	Dengue	QC	NaN	NaN	NaN	65.3729	0.0594637
Dengue / QC	_SVDEALR_	P32119	1.20077	1.20077	1.93718e-05	2.77005e-05	104	P32119	PRDX2	Peroxiredoxin-2	PRDX2_HUMAN	1	129.862	2.29862	Dengue	QC	NaN	NaN	NaN	59.9096	0.141072
Dengue / QC	_ELKEQQDSPGNK_	P08697	0.689541	0.689541	1.93898e-05	2.77192e-05	62	P08697	SERPINF2	Alpha-2-antiplasmin	A2AP_HUMAN	1	61.277	1.61277	Dengue	QC	NaN	NaN	NaN	33.4814	0.135922
Dengue / QC	_ILGGHLDAK_	P00738	-0.675637	0.675637	1.93988e-05	2.77251e-05	176	P00738	HP	Haptoglobin	HPT_HUMAN	1	-37.3944	0.626056	Dengue	QC	NaN	NaN	NaN	51.921	0.161688
Dengue / QC	_IVQIYKDLLR_	P43652	0.717582	0.717582	1.94984e-05	2.78604e-05	24	P43652	AFM	Afamin	AFAM_HUMAN	1	64.4424	1.64442	Dengue	QC	NaN	NaN	NaN	17.103	0.140472
Dengue / QC	_IGLDLPALNMQR_	P05164;P05164-2;P05164-3	0.830542	0.830542	1.95267e-05	2.78939e-05	52	P05164;P05164-2;P05164-3	MPO	Myeloperoxidase;Isoform H14 of Myeloperoxidase;Isoform H7 of Myeloperoxidase	PERM_HUMAN	1	77.8353	1.77835	Dengue	QC	NaN	NaN	NaN	38.8957	0.211422
Dengue / QC	_NGPLSC[Carbamidomethyl (C)]GQR_	P00748	0.346398	0.346398	1.97333e-05	2.81663e-05	92	P00748	F12	Coagulation factor XII	FA12_HUMAN	1	27.1382	1.27138	Dengue	QC	NaN	NaN	NaN	52.027	0.0787486
Dengue / QC	_EQDLEVILHNGAC[Carbamidomethyl (C)]SPGAR_	P04275	1.07385	1.07385	1.98019e-05	2.82445e-05	30	P04275	VWF	von Willebrand factor	VWF_HUMAN	1	110.504	2.10504	Dengue	QC	NaN	NaN	NaN	18.0986	0.168652
Dengue / QC	_STSTAYMELSSLR_	P01742	0.460522	0.460522	1.98749e-05	2.83204e-05	132	P01742	IGHV1-69	Immunoglobulin heavy variable 1-69	HV169_HUMAN	1	37.6039	1.37604	Dengue	QC	NaN	NaN	NaN	126.272	0.11534
Dengue / QC	_AAMVGMLANFLGFR_	P01019	0.738114	0.738114	1.98703e-05	2.83204e-05	56	P01019	AGT	Angiotensinogen	ANGT_HUMAN	1	66.7994	1.66799	Dengue	QC	NaN	NaN	NaN	35.5538	0.171742
Dengue / QC	_DFNIPGFPTVR_	O00391	0.551988	0.551988	1.98839e-05	2.83258e-05	50	O00391	QSOX1	Sulfhydryl oxidase 1	QSOX1_HUMAN	1	46.6105	1.4661	Dengue	QC	NaN	NaN	NaN	40.8898	0.134237
Dengue / QC	_LNDLNSVLVMPTFHVPFTDLQVPSC[Carbamidomethyl (C)]K_	P04114	1.58514	1.58514	1.99253e-05	2.83776e-05	20	P04114	APOB	Apolipoprotein B-100	APOB_HUMAN	1	200.038	3.00038	Dengue	QC	NaN	NaN	NaN	13.0569	0.307268
Dengue / QC	_ITEVWGIPSPIDTVFTR_	A0A0U1RR20;Q92954;Q92954-3;Q92954-6	0.710748	0.710748	2.00026e-05	2.84735e-05	66	A0A0U1RR20;Q92954;Q92954-3;Q92954-6	PRG4	Proteoglycan 4;Proteoglycan 4;Isoform C of Proteoglycan 4;Isoform F of Proteoglycan 4	A0A0U1RR20_HUMAN;PRG4_HUMAN;PRG4_HUMAN;PRG4_HUMAN	1	63.6652	1.63665	Dengue	QC	NaN	NaN	NaN	28.541	0.194534
Dengue / QC	_SQEFLEDADRK_	P19320	0.72209	0.72209	2.00811e-05	2.85637e-05	62	P19320	VCAM1	Vascular cell adhesion protein 1	VCAM1_HUMAN	1	64.9569	1.64957	Dengue	QC	NaN	NaN	NaN	33.1817	0.440545
Dengue / QC	_DIPQPHAEPWAFSLDLGLK_	I3L145;P04278	0.83291	0.83291	2.04175e-05	2.89843e-05	122	I3L145;P04278	SHBG	Sex hormone-binding globulin	I3L145_HUMAN;SHBG_HUMAN	1	78.1275	1.78128	Dengue	QC	NaN	NaN	NaN	85.4036	0.157766
Dengue / QC	_C[Carbamidomethyl (C)]EELQGQK_	P27918	0.922043	0.922043	2.0435e-05	2.90019e-05	38	P27918	CFP	Properdin	PROP_HUMAN	1	89.4796	1.8948	Dengue	QC	NaN	NaN	NaN	23.2889	0.149736
Dengue / QC	_VTVFPIGIGDR_	P04275	0.789433	0.789433	2.08889e-05	2.95943e-05	60	P04275	VWF	von Willebrand factor	VWF_HUMAN	1	72.8395	1.72839	Dengue	QC	NaN	NaN	NaN	45.5479	0.158136
Dengue / QC	_NPDSSTTGPWC[Carbamidomethyl (C)]YTTDPTVRR_	P00734	0.247282	0.247282	2.09336e-05	2.96429e-05	168	P00734	F2	Prothrombin	THRB_HUMAN	1	18.6969	1.18697	Dengue	QC	NaN	NaN	NaN	104.228	0.05312
Dengue / QC	_GSRPQGPFLIADKWPALPR_	P14780	2.7817	2.7817	2.0972e-05	2.96899e-05	18	P14780	MMP9	Matrix metalloproteinase-9	MMP9_HUMAN	1	587.66	6.8766	Dengue	QC	NaN	NaN	NaN	10.99	0.327135
Dengue / QC	_ALHQVFEHM[Oxidation (M)]LDVSK_	B4E1Z4	6.38868	6.38868	2.09789e-05	2.96922e-05	18	B4E1Z4	NaN	cDNA FLJ55673, highly similar to Complement factor B (EC 3.4.21.47)	B4E1Z4_HUMAN	1	8278.86	83.7886	Dengue	QC	NaN	NaN	NaN	6.21084	0.765336
Dengue / QC	_IQALQQQADEAEDRAQGLQR_	P67936	0.777894	0.777894	2.09882e-05	2.96981e-05	60	P67936	TPM4	Tropomyosin alpha-4 chain	TPM4_HUMAN	1	71.4627	1.71463	Dengue	QC	NaN	NaN	NaN	43.9081	0.147976
Dengue / QC	_QEDDLANINQWVK_	P08697	0.423165	0.423165	2.12185e-05	2.99865e-05	114	P08697	SERPINF2	Alpha-2-antiplasmin	A2AP_HUMAN	1	34.0866	1.34087	Dengue	QC	NaN	NaN	NaN	77.3475	0.0891148
Dengue / QC	_EPC[Carbamidomethyl (C)]VESLVSQYFQTVTDYGKDLMEK_	P02652;V9GYM3	0.558422	0.558422	2.14371e-05	3.02532e-05	134	P02652;V9GYM3	APOA2	Apolipoprotein A-II	APOA2_HUMAN;V9GYM3_HUMAN	1	47.2658	1.47266	Dengue	QC	NaN	NaN	NaN	54.0583	0.108788
Dengue / QC	_MVC[Carbamidomethyl (C)]AGYKEGGK_	H0YAC1;P03952	2.49396	2.49396	2.14391e-05	3.02532e-05	14	H0YAC1;P03952	KLKB1	Plasma kallikrein (Fragment);Plasma kallikrein	H0YAC1_HUMAN;KLKB1_HUMAN	1	463.32	5.6332	Dengue	QC	NaN	NaN	NaN	7.32983	0.27139
Dengue / QC	_QC[Carbamidomethyl (C)]VSPC[Carbamidomethyl (C)]AR_	P04275	1.43963	1.43963	2.15842e-05	3.04428e-05	20	P04275	VWF	von Willebrand factor	VWF_HUMAN	1	171.251	2.71251	Dengue	QC	NaN	NaN	NaN	14.9038	0.173394
Dengue / QC	_GQPREPQVYTLPPSREEMTK_	P01860	-0.436557	0.436557	2.1747e-05	3.06193e-05	176	P01860	IGHG3	Immunoglobulin heavy constant gamma 3	IGHG3_HUMAN	1	-26.1104	0.738896	Dengue	QC	NaN	NaN	NaN	70.2082	0.0982446
Dengue / QC	_ASGYTFTSYAMHWVR_	A0A0C4DH29	1.75908	1.75908	2.19846e-05	3.08774e-05	54	A0A0C4DH29	IGHV1-3	Immunoglobulin heavy variable 1-3	HV103_HUMAN	1	238.482	3.38482	Dengue	QC	NaN	NaN	NaN	31.5068	0.406649
Dengue / QC	_GHIYQGSEADSVFSGFLIFPSA_	P02745	1.17367	1.17367	2.21402e-05	3.10882e-05	36	P02745	C1QA	Complement C1q subcomponent subunit A	C1QA_HUMAN	1	125.585	2.25585	Dengue	QC	NaN	NaN	NaN	8.73062	0.208272
Dengue / QC	_GEWPWQVTLHTTSPTQR_	P03951	1.11364	1.11364	2.21765e-05	3.11314e-05	28	P03951	F11	Coagulation factor XI	FA11_HUMAN	1	116.392	2.16392	Dengue	QC	NaN	NaN	NaN	22.8907	0.182676
Dengue / QC	_LVTDLTK_	P02768	-0.364087	0.364087	2.24011e-05	3.14313e-05	176	P02768	ALB	Serum albumin	ALBU_HUMAN	1	-22.304	0.77696	Dengue	QC	NaN	NaN	NaN	44.3777	0.0814368
Dengue / QC	_VVLSQGSK_	I3L145;P04278	1.4819	1.4819	2.2713e-05	3.18296e-05	20	I3L145;P04278	SHBG	Sex hormone-binding globulin	I3L145_HUMAN;SHBG_HUMAN	1	179.316	2.79316	Dengue	QC	NaN	NaN	NaN	13.1544	0.242194
Dengue / QC	_AEFAEVSK_	P02768	-0.377526	0.377526	2.28342e-05	3.19916e-05	176	P02768	ALB	Serum albumin	ALBU_HUMAN	1	-23.0244	0.769756	Dengue	QC	NaN	NaN	NaN	42.7711	0.0899356
Dengue / QC	_NIQSLEVIGK_	P02775	-0.342722	0.342722	2.29819e-05	3.21825e-05	174	P02775	PPBP	Platelet basic protein	CXCL7_HUMAN	1	-21.1448	0.788552	Dengue	QC	NaN	NaN	NaN	65.6897	0.0729437
Dengue / QC	_NSEEFAAAM[Oxidation (M)]SR_	P04114	0.479404	0.479404	2.30113e-05	3.22159e-05	94	P04114	APOB	Apolipoprotein B-100	APOB_HUMAN	1	39.4167	1.39417	Dengue	QC	NaN	NaN	NaN	48.5437	0.112642
Dengue / QC	_VNEPSILEMSR_	O14791;O14791-2	-0.275775	0.275775	2.30681e-05	3.22873e-05	176	O14791;O14791-2	APOL1	Apolipoprotein L1;Isoform 2 of Apolipoprotein L1	APOL1_HUMAN	1	-17.3993	0.826007	Dengue	QC	NaN	NaN	NaN	89.7688	0.0608316
Dengue / QC	_NKPGVYTDVAYYLAWIR_	P00748	1.15496	1.15496	2.3347e-05	3.26375e-05	44	P00748	F12	Coagulation factor XII	FA12_HUMAN	1	122.678	2.22678	Dengue	QC	NaN	NaN	NaN	26.7457	0.231493
Dengue / QC	_ANSFLGEK_	A0A140TA49	0.339909	0.339909	2.33791e-05	3.26744e-05	114	A0A140TA49	C4A	Complement C4-A	A0A140TA49_HUMAN	1	26.5676	1.26568	Dengue	QC	NaN	NaN	NaN	54.2283	0.111309
Dengue / QC	_TFTC[Carbamidomethyl (C)]TAAYPESKTPLTATLSK_	P01876	2.03036	2.03036	2.34027e-05	3.26993e-05	156	P01876	IGHA1	Immunoglobulin heavy constant alpha 1	IGHA1_HUMAN	1	308.506	4.08506	Dengue	QC	NaN	NaN	NaN	135.11	0.402778
Dengue / QC	_TVAAPSVFIFPPSDEQLK_	P01834	-0.525541	0.525541	2.36528e-05	3.30326e-05	176	P01834	IGKC	Immunoglobulin kappa constant	IGKC_HUMAN	1	-30.5301	0.694699	Dengue	QC	NaN	NaN	NaN	62.8408	0.103908
Dengue / QC	_TAGWNIPM[Oxidation (M)]GLLYNKINHC[Carbamidomethyl (C)]RFDEFFSEGC[Carbamidomethyl (C)]APGSK_	P02787	1.75697	1.75697	2.41043e-05	3.36136e-05	130	P02787	TF	Serotransferrin	TRFE_HUMAN	1	237.988	3.37988	Dengue	QC	NaN	NaN	NaN	110.648	0.275618
Dengue / QC	_SITC[Carbamidomethyl (C)]IHGVWTQLPQC[Carbamidomethyl (C)]VAIDKLKK_	P08603	0.790658	0.790658	2.41694e-05	3.36961e-05	170	P08603	CFH	Complement factor H	CFAH_HUMAN	1	72.9864	1.72986	Dengue	QC	NaN	NaN	NaN	130.001	0.164155
Dengue / QC	_SRLDTLAQEVALLKEQQALQTVC[Carbamidomethyl (C)]LK_	E9PHK0;P05452	1.23464	1.23464	2.42466e-05	3.37871e-05	24	E9PHK0;P05452	CLEC3B	Tetranectin	E9PHK0_HUMAN;TETN_HUMAN	1	135.323	2.35323	Dengue	QC	NaN	NaN	NaN	12.2437	0.251784
Dengue / QC	_NAIWIDC[Carbamidomethyl (C)]GIHAR_	A0A087WSY5;Q96IY4	1.01475	1.01475	2.42847e-05	3.38296e-05	40	A0A087WSY5;Q96IY4	CPB2	Carboxypeptidase B2	A0A087WSY5_HUMAN;CBPB2_HUMAN	1	102.055	2.02055	Dengue	QC	NaN	NaN	NaN	8.62151	0.158231
Dengue / QC	_C[Carbamidomethyl (C)]DPHEATC[Carbamidomethyl (C)]YDDGK_	P02751;P02751-15;P02751-3;P02751-7	1.16612	1.16612	2.43399e-05	3.38829e-05	34	P02751;P02751-15;P02751-3;P02751-7	FN1	Fibronectin;Isoform 15 of Fibronectin;Isoform 3 of Fibronectin;Isoform 7 of Fibronectin	FINC_HUMAN	1	124.408	2.24408	Dengue	QC	NaN	NaN	NaN	23.2116	0.326274
Dengue / QC	_MYLGYEYVTAIRNLR_	P02787	2.20083	2.20083	2.43451e-05	3.38829e-05	56	P02787	TF	Serotransferrin	TRFE_HUMAN	1	359.744	4.59744	Dengue	QC	NaN	NaN	NaN	27.7224	0.270762
Dengue / QC	_GDTYPAELYITGSILR_	P05160	0.331504	0.331504	2.45242e-05	3.41154e-05	140	P05160	F13B	Coagulation factor XIII B chain	F13B_HUMAN	1	25.8324	1.25832	Dengue	QC	NaN	NaN	NaN	66.8341	0.0923527
Dengue / QC	_AAC[Carbamidomethyl (C)]LLPKLDELRDEGK_	P02768	2.02046	2.02046	2.49137e-05	3.45558e-05	146	P02768	ALB	Serum albumin	ALBU_HUMAN	1	305.714	4.05714	Dengue	QC	NaN	NaN	NaN	112.963	0.288429
Dengue / QC	_VTMSVDTSK_	A0A0C4DH34	-0.398458	0.398458	2.49764e-05	3.46343e-05	176	A0A0C4DH34	IGHV4-28	Immunoglobulin heavy variable 4-28	HV428_HUMAN	1	-24.1331	0.758669	Dengue	QC	NaN	NaN	NaN	65.2527	0.100593
Dengue / QC	_YVVVSHTAGSSC[Carbamidomethyl (C)]NTPASC[Carbamidomethyl (C)]QQQAR_	O75594	1.21362	1.21362	2.51579e-05	3.4869e-05	26	O75594	PGLYRP1	Peptidoglycan recognition protein 1	PGRP1_HUMAN	1	131.919	2.31919	Dengue	QC	NaN	NaN	NaN	16.6799	0.252897
Dengue / QC	_DNSKNTLYLQMNSLR_	A0A0J9YVT0;P0DP02	-0.488944	0.488944	2.52107e-05	3.49335e-05	176	A0A0J9YVT0;P0DP02	IGHV3-33;IGHV3-30-3	Immunoglobulin heavy variable 3-33 (Fragment);Immunoglobulin heavy variable 3-30-3	A0A0J9YVT0_HUMAN;HVC33_HUMAN	1	-28.7454	0.712546	Dengue	QC	NaN	NaN	NaN	71.1885	0.0924738
Dengue / QC	_FSGQLNSHGC[Carbamidomethyl (C)]FYQQVK_	P01023	-0.507819	0.507819	2.52288e-05	3.49417e-05	174	P01023	A2M	Alpha-2-macroglobulin	A2MG_HUMAN	1	-29.6715	0.703285	Dengue	QC	NaN	NaN	NaN	57.0608	0.110564
Dengue / QC	_LHIDDMEFEPK_	P19320	1.22577	1.22577	2.52966e-05	3.501e-05	20	P19320	VCAM1	Vascular cell adhesion protein 1	VCAM1_HUMAN	1	133.88	2.3388	Dengue	QC	NaN	NaN	NaN	13.7569	0.205269
Dengue / QC	_AEDHFSVIDFNQNIR_	P19823	0.498099	0.498099	2.53936e-05	3.51185e-05	62	P19823	ITIH2	Inter-alpha-trypsin inhibitor heavy chain H2	ITIH2_HUMAN	1	41.2351	1.41235	Dengue	QC	NaN	NaN	NaN	45.8707	0.105785
Dengue / QC	_QTVEAMK_	P19823	1.33391	1.33391	2.55289e-05	3.5297e-05	16	P19823	ITIH2	Inter-alpha-trypsin inhibitor heavy chain H2	ITIH2_HUMAN	1	152.084	2.52084	Dengue	QC	NaN	NaN	NaN	10.033	0.197463
Dengue / QC	_HRGVYSSDVFDIFPGTYQTLEMFPR_	P00450	0.745677	0.745677	2.55989e-05	3.53767e-05	174	P00450	CP	Ceruloplasmin	CERU_HUMAN	1	67.6761	1.67676	Dengue	QC	NaN	NaN	NaN	140.497	0.122688
Dengue / QC	_WQEEMELYRQK_	P02647	0.902332	0.902332	2.5882e-05	3.57496e-05	22	P02647	APOA1	Apolipoprotein A-I	APOA1_HUMAN	1	86.9084	1.86908	Dengue	QC	NaN	NaN	NaN	16.5013	0.139298
Dengue / QC	_GAYPLSIEPIGVR_	P00450	-0.586433	0.586433	2.59363e-05	3.57994e-05	176	P00450	CP	Ceruloplasmin	CERU_HUMAN	1	-33.4012	0.665988	Dengue	QC	NaN	NaN	NaN	45.7563	0.116376
Dengue / QC	_ASPAFLASQNTK_	P20742	2.1604	2.1604	2.59427e-05	3.57995e-05	126	P20742	PZP	Pregnancy zone protein	PZP_HUMAN	1	347.038	4.47038	Dengue	QC	NaN	NaN	NaN	86.2018	0.513597
Dengue / QC	_TLIEKTNEER_	P10909;P10909-2;P10909-4;P10909-5	0.527113	0.527113	2.59846e-05	3.58486e-05	140	P10909;P10909-2;P10909-4;P10909-5	CLU	Clusterin;Isoform 2 of Clusterin;Isoform 4 of Clusterin;Isoform 5 of Clusterin	CLUS_HUMAN	1	44.1042	1.44104	Dengue	QC	NaN	NaN	NaN	114.149	0.120886
Dengue / QC	_FSGSLLGGK_	P04211	-0.424003	0.424003	2.62958e-05	3.62252e-05	174	P04211	IGLV7-43	Immunoglobulin lambda variable 7-43	LV743_HUMAN	1	-25.4646	0.745354	Dengue	QC	NaN	NaN	NaN	66.2495	0.0914892
Dengue / QC	_LKQVLLHQQAK_	E7ER44;P02788	0.453042	0.453042	2.64424e-05	3.64096e-05	22	E7ER44;P02788	LTF	Lactotransferrin	E7ER44_HUMAN;TRFL_HUMAN	1	36.8924	1.36892	Dengue	QC	NaN	NaN	NaN	14.743	0.288905
Dengue / QC	_VNRNNLELSTPLKIETISHEDLQR_	P07225	0.576405	0.576405	2.64675e-05	3.64264e-05	98	P07225	PROS1	Vitamin K-dependent protein S	PROS_HUMAN	1	49.1129	1.49113	Dengue	QC	NaN	NaN	NaN	40.768	0.112294
Dengue / QC	_STDYGIFQINSR_	P61626	-0.45944	0.45944	2.64658e-05	3.64264e-05	168	P61626	LYZ	Lysozyme C	LYSC_HUMAN	1	-27.2732	0.727268	Dengue	QC	NaN	NaN	NaN	101.622	0.0984742
Dengue / QC	_LGLGADVAQVTGALR_	P14780	1.33766	1.33766	2.67019e-05	3.67313e-05	50	P14780	MMP9	Matrix metalloproteinase-9	MMP9_HUMAN	1	152.741	2.52741	Dengue	QC	NaN	NaN	NaN	39.4942	0.238733
Dengue / QC	_ADVKGHGATNDLTFTEEVDMKEMEK_	Q06033;Q06033-2	1.85111	1.85111	2.67709e-05	3.68173e-05	16	Q06033;Q06033-2	ITIH3	Inter-alpha-trypsin inhibitor heavy chain H3;Isoform 2 of Inter-alpha-trypsin inhibitor heavy chain H3	ITIH3_HUMAN	1	260.777	3.60777	Dengue	QC	NaN	NaN	NaN	10.4719	0.240597
Dengue / QC	_SLAPYAQDTQEK_	P06727	0.457929	0.457929	2.68089e-05	3.68606e-05	112	P06727	APOA4	Apolipoprotein A-IV	APOA4_HUMAN	1	37.3569	1.37357	Dengue	QC	NaN	NaN	NaN	105.336	0.0974941
Dengue / QC	_DQYYNIDVPSR_	A0A0U1RR20;Q92954;Q92954-3;Q92954-6	1.14481	1.14481	2.68449e-05	3.69012e-05	66	A0A0U1RR20;Q92954;Q92954-3;Q92954-6	PRG4	Proteoglycan 4;Proteoglycan 4;Isoform C of Proteoglycan 4;Isoform F of Proteoglycan 4	A0A0U1RR20_HUMAN;PRG4_HUMAN;PRG4_HUMAN;PRG4_HUMAN	1	121.117	2.21117	Dengue	QC	NaN	NaN	NaN	5.69566	0.11715
Dengue / QC	_A[Acetyl (Protein N-term)]GWNAYIDNLMADGTC[Carbamidomethyl (C)]QDAAIVGYK_	P07737	0.463332	0.463332	2.688e-05	3.69405e-05	62	P07737	PFN1	Profilin-1	PROF1_HUMAN	1	37.8723	1.37872	Dengue	QC	NaN	NaN	NaN	54.3384	0.124924
Dengue / QC	_VASYGVKPR_	B4E1Z4	-0.532927	0.532927	2.6903e-05	3.69543e-05	92	B4E1Z4	NaN	cDNA FLJ55673, highly similar to Complement factor B (EC 3.4.21.47)	B4E1Z4_HUMAN	1	-30.8849	0.691151	Dengue	QC	NaN	NaN	NaN	40.6752	0.144267
Dengue / QC	_LATALQK_	P67936	2.99877	2.99877	2.71909e-05	3.73407e-05	24	P67936	TPM4	Tropomyosin alpha-4 chain	TPM4_HUMAN	1	699.32	7.9932	Dengue	QC	NaN	NaN	NaN	15.8564	0.391315
Dengue / QC	_TC[Carbamidomethyl (C)]QAWSSMTPHSHSR_	P08519	1.22289	1.22289	2.72243e-05	3.73595e-05	154	P08519	LPA	Apolipoprotein(a)	APOA_HUMAN	1	133.413	2.33413	Dengue	QC	NaN	NaN	NaN	135.996	0.225824
Dengue / QC	_EPQVYTLPPSREEM[Oxidation (M)]TK_	P01860	-0.695393	0.695393	2.72186e-05	3.73595e-05	174	P01860	IGHG3	Immunoglobulin heavy constant gamma 3	IGHG3_HUMAN	1	-38.2459	0.617541	Dengue	QC	NaN	NaN	NaN	49.7578	0.152971
Dengue / QC	_YLYEIARR_	P02768	-0.352228	0.352228	2.81806e-05	3.86065e-05	176	P02768	ALB	Serum albumin	ALBU_HUMAN	1	-21.6627	0.783373	Dengue	QC	NaN	NaN	NaN	44.6061	0.0783894
Dengue / QC	_C[Carbamidomethyl (C)]FDETRYEYLEGGDR_	Q04756	0.774123	0.774123	2.87095e-05	3.92555e-05	28	Q04756	HGFAC	Hepatocyte growth factor activator	HGFA_HUMAN	1	71.015	1.71015	Dengue	QC	NaN	NaN	NaN	14.87	0.157776
Dengue / QC	_KYSDASDC[Carbamidomethyl (C)]HGEDSQAFC[Carbamidomethyl (C)]EK_	P01023	-0.532944	0.532944	2.91855e-05	3.98201e-05	176	P01023	A2M	Alpha-2-macroglobulin	A2MG_HUMAN	1	-30.8857	0.691143	Dengue	QC	NaN	NaN	NaN	48.1004	0.12226
Dengue / QC	_ATAQMLEVMFK_	P18428	0.464865	0.464865	2.92735e-05	3.99114e-05	122	P18428	LBP	Lipopolysaccharide-binding protein	LBP_HUMAN	1	38.0188	1.38019	Dengue	QC	NaN	NaN	NaN	103.482	0.10746
Dengue / QC	_RVTGC[Carbamidomethyl (C)]PPFDEHK_	P04275	0.895677	0.895677	3.09191e-05	4.19137e-05	16	P04275	VWF	von Willebrand factor	VWF_HUMAN	1	86.0482	1.86048	Dengue	QC	NaN	NaN	NaN	10.4661	0.159579
Dengue / QC	_MATTM[Oxidation (M)]IQSK_	P19823	1.07927	1.07927	3.09277e-05	4.19154e-05	84	P19823	ITIH2	Inter-alpha-trypsin inhibitor heavy chain H2	ITIH2_HUMAN	1	111.297	2.11297	Dengue	QC	NaN	NaN	NaN	44.1084	0.298069
Dengue / QC	_GALQNIIPASTGAAK_	P04406	0.621956	0.621956	3.11061e-05	4.21378e-05	46	P04406	GAPDH	Glyceraldehyde-3-phosphate dehydrogenase	G3P_HUMAN	1	53.896	1.53896	Dengue	QC	NaN	NaN	NaN	31.4147	0.149456
Dengue / QC	_EAGIPEFYDYDVALIKLK_	B4E1Z4	1.42172	1.42172	3.11887e-05	4.22288e-05	34	B4E1Z4	NaN	cDNA FLJ55673, highly similar to Complement factor B (EC 3.4.21.47)	B4E1Z4_HUMAN	1	167.905	2.67905	Dengue	QC	NaN	NaN	NaN	22.6882	0.296994
Dengue / QC	_SNLC[Carbamidomethyl (C)]ALC[Carbamidomethyl (C)]IGDEQGENK_	E7ER44;P02788	0.948308	0.948308	3.13421e-05	4.24062e-05	50	E7ER44;P02788	LTF	Lactotransferrin	E7ER44_HUMAN;TRFL_HUMAN	1	92.9608	1.92961	Dengue	QC	NaN	NaN	NaN	40.8083	0.205837
Dengue / QC	_KPVDEYK_	P02787	0.956999	0.956999	3.15643e-05	4.26358e-05	108	P02787	TF	Serotransferrin	TRFE_HUMAN	1	94.1267	1.94127	Dengue	QC	NaN	NaN	NaN	39.9715	0.179664
Dengue / QC	_FTDSENVC[Carbamidomethyl (C)]QERDADPDTFFAK_	P43652	0.58785	0.58785	3.18796e-05	4.30208e-05	84	P43652	AFM	Afamin	AFAM_HUMAN	1	50.3005	1.503	Dengue	QC	NaN	NaN	NaN	45.1338	0.100737
Dengue / QC	_TRFVYHLSDLC[Carbamidomethyl (C)]KK_	P01591	1.46921	1.46921	3.25884e-05	4.39148e-05	80	P01591	JCHAIN	Immunoglobulin J chain	IGJ_HUMAN	1	176.869	2.76869	Dengue	QC	NaN	NaN	NaN	71.8371	0.277356
Dengue / QC	_IYGKWYNLAIGSTC[Carbamidomethyl (C)]PWLK_	P02760	1.6625	1.6625	3.2957e-05	4.43753e-05	24	P02760	AMBP	Protein AMBP	AMBP_HUMAN	1	216.565	3.16565	Dengue	QC	NaN	NaN	NaN	18.6481	0.271461
Dengue / QC	_LDNIYSSDK_	P04114	0.522443	0.522443	3.29939e-05	4.44085e-05	64	P04114	APOB	Apolipoprotein B-100	APOB_HUMAN	1	43.6385	1.43639	Dengue	QC	NaN	NaN	NaN	48.8092	0.085702
Dengue / QC	_EQPGVYTK_	H0YAC1;P03952	0.295362	0.295362	3.33997e-05	4.48909e-05	90	H0YAC1;P03952	KLKB1	Plasma kallikrein (Fragment);Plasma kallikrein	H0YAC1_HUMAN;KLKB1_HUMAN	1	22.7193	1.22719	Dengue	QC	NaN	NaN	NaN	52.9543	0.0835275
Dengue / QC	_C[Carbamidomethyl (C)]SAPEPSQKPPGKPC[Carbamidomethyl (C)]PGLAYEQR_	P27918	0.213167	0.213167	3.33923e-05	4.48909e-05	112	P27918	CFP	Properdin	PROP_HUMAN	1	15.923	1.15923	Dengue	QC	NaN	NaN	NaN	62.8714	0.0794449
Dengue / QC	_YGC[Carbamidomethyl (C)]ASGYK_	P05160	2.82147	2.82147	3.35494e-05	4.50602e-05	34	P05160	F13B	Coagulation factor XIII B chain	F13B_HUMAN	1	606.884	7.06884	Dengue	QC	NaN	NaN	NaN	18.9689	0.438796
Dengue / QC	_DFALLSLQVPLKDAK_	P0C0L5	0.259901	0.259901	3.44287e-05	4.61322e-05	174	P0C0L5	C4B	Complement C4-B	CO4B_HUMAN	1	19.7397	1.1974	Dengue	QC	NaN	NaN	NaN	131.183	0.0823967
Dengue / QC	_SPC[Carbamidomethyl (C)]YGYQWVSEEHEEAHHTAYLVFSPSK_	P01023	-0.514007	0.514007	3.47591e-05	4.65324e-05	172	P01023	A2M	Alpha-2-macroglobulin	A2MG_HUMAN	1	-29.9725	0.700275	Dengue	QC	NaN	NaN	NaN	58.0688	0.111895
Dengue / QC	_KALQTEMAR_	P11226	1.10385	1.10385	3.47778e-05	4.6545e-05	30	P11226	MBL2	Mannose-binding protein C	MBL2_HUMAN	1	114.927	2.14927	Dengue	QC	NaN	NaN	NaN	17.7907	0.205741
Dengue / QC	_QFTSSTSYNRGDSTFESK_	P02671	1.66856	1.66856	3.53836e-05	4.72447e-05	170	P02671	FGA	Fibrinogen alpha chain	FIBA_HUMAN	1	217.897	3.17897	Dengue	QC	NaN	NaN	NaN	148.767	0.332842
Dengue / QC	_SFYFPMSIDK_	P05160	0.937866	0.937866	3.57812e-05	4.77083e-05	38	P05160	F13B	Coagulation factor XIII B chain	F13B_HUMAN	1	91.5693	1.91569	Dengue	QC	NaN	NaN	NaN	7.64345	0.128645
Dengue / QC	_ADLEKLTSLSDRYVSHFETEGPHVLLYFDSVPTSR_	P0C0L5	0.381648	0.381648	3.59838e-05	4.79506e-05	126	P0C0L5	C4B	Complement C4-B	CO4B_HUMAN	1	30.2829	1.30283	Dengue	QC	NaN	NaN	NaN	96.2438	0.108588
Dengue / QC	_GYTQQLAFRQPSSAFAAFVKR_	P01024	-0.488848	0.488848	3.60625e-05	4.80269e-05	170	P01024	C3	Complement C3	CO3_HUMAN	1	-28.7406	0.712594	Dengue	QC	NaN	NaN	NaN	50.1045	0.0934737
Dengue / QC	_PTKEDVYVVGTVLR_	P04003	0.314259	0.314259	3.63174e-05	4.83438e-05	66	P04003	C4BPA	C4b-binding protein alpha chain	C4BPA_HUMAN	1	24.3373	1.24337	Dengue	QC	NaN	NaN	NaN	36.0255	0.0818385
Dengue / QC	_C[Carbamidomethyl (C)]C[Carbamidomethyl (C)]ESASEDC[Carbamidomethyl (C)]MAKELPEHTVK_	P02774;P02774-3	1.06277	1.06277	3.64333e-05	4.8464e-05	128	P02774;P02774-3	GC	Vitamin D-binding protein;Isoform 3 of Vitamin D-binding protein	VTDB_HUMAN	1	108.893	2.08893	Dengue	QC	NaN	NaN	NaN	119.52	0.216713
Dengue / QC	_ARPHAWPFMVSLQLR_	P08246	1.54261	1.54261	3.64768e-05	4.85103e-05	52	P08246	ELANE	Neutrophil elastase	ELNE_HUMAN	1	191.321	2.91321	Dengue	QC	NaN	NaN	NaN	30.8004	0.405121
Dengue / QC	_WC[Carbamidomethyl (C)]AVSEHEATKC[Carbamidomethyl (C)]QSFR_	P02787	1.60213	1.60213	3.64883e-05	4.85103e-05	126	P02787	TF	Serotransferrin	TRFE_HUMAN	1	203.591	3.03591	Dengue	QC	NaN	NaN	NaN	117.074	0.32233
Dengue / QC	_KLISVDTEHSNIYLQNGPDRIGR_	P00450	0.810745	0.810745	3.67422e-05	4.87909e-05	126	P00450	CP	Ceruloplasmin	CERU_HUMAN	1	75.4117	1.75412	Dengue	QC	NaN	NaN	NaN	91.4323	0.135052
Dengue / QC	_SLPEGVANGIEVYSTK_	Q06033;Q06033-2	-0.540712	0.540712	3.67476e-05	4.87909e-05	174	Q06033;Q06033-2	ITIH3	Inter-alpha-trypsin inhibitor heavy chain H3;Isoform 2 of Inter-alpha-trypsin inhibitor heavy chain H3	ITIH3_HUMAN	1	-31.2568	0.687432	Dengue	QC	NaN	NaN	NaN	55.0855	0.111403
Dengue / QC	_SDIAPVAR_	P01023	-0.367565	0.367565	3.68891e-05	4.8933e-05	176	P01023	A2M	Alpha-2-macroglobulin	A2MG_HUMAN	1	-22.4911	0.775089	Dengue	QC	NaN	NaN	NaN	108.966	0.0880999
Dengue / QC	_EDIPPADLSDQVPDTESETR_	P01024	2.5977	2.5977	3.69316e-05	4.89665e-05	142	P01024	C3	Complement C3	CO3_HUMAN	1	505.322	6.05322	Dengue	QC	NaN	NaN	NaN	68.0627	0.262515
Dengue / QC	_HVVGQFSK_	A0A0A0MRT8;O75602;O75602-2;O75602-3;O75602-4;O75602-5	3.44056	3.44056	3.69306e-05	4.89665e-05	48	A0A0A0MRT8;O75602;O75602-2;O75602-3;O75602-4;O75602-5	SPAG6	Sperm-associated antigen 6;Sperm-associated antigen 6;Isoform 2 of Sperm-associated antigen 6;Isoform 3 of Sperm-associated antigen 6;Isoform 4 of Sperm-associated antigen 6;Isoform 5 of Sperm-associated antigen 6	A0A0A0MRT8_HUMAN;SPAG6_HUMAN;SPAG6_HUMAN;SPAG6_HUMAN;SPAG6_HUMAN;SPAG6_HUMAN	1	985.705	10.8571	Dengue	QC	NaN	NaN	NaN	33.3666	0.56127
Dengue / QC	_YLLYYYSDSDKGQGSGVPSR_	A0A075B6J1	0.720462	0.720462	3.71424e-05	4.92115e-05	74	A0A075B6J1	IGLV5-37	Immunoglobulin lambda variable 5-37	LV537_HUMAN	1	64.771	1.64771	Dengue	QC	NaN	NaN	NaN	64.1552	0.149337
Dengue / QC	_QRQEELC[Carbamidomethyl (C)]LAR_	P02753;Q5VY30	0.586285	0.586285	3.78333e-05	5.00219e-05	160	P02753;Q5VY30	RBP4	Retinol-binding protein 4;Retinol binding protein 4, plasma, isoform CRA_b	RET4_HUMAN;Q5VY30_HUMAN	1	50.1376	1.50138	Dengue	QC	NaN	NaN	NaN	130.985	0.115095
Dengue / QC	_ELSSFIDKGQELC[Carbamidomethyl (C)]ADYSENTFTEYKK_	P02774;P02774-3	0.272761	0.272761	3.79457e-05	5.01589e-05	142	P02774;P02774-3	GC	Vitamin D-binding protein;Isoform 3 of Vitamin D-binding protein	VTDB_HUMAN	1	20.8118	1.20812	Dengue	QC	NaN	NaN	NaN	101.807	0.0681981
Dengue / QC	_SDVM[Oxidation (M)]YTDWK_	P19652	-0.525642	0.525642	3.84242e-05	5.0756e-05	168	P19652	ORM2	Alpha-1-acid glycoprotein 2	A1AG2_HUMAN	1	-30.535	0.69465	Dengue	QC	NaN	NaN	NaN	50.8043	0.118666
Dengue / QC	_INPNSGGTNYAQK_	A0A075B7D0	1.65535	1.65535	3.8422e-05	5.0756e-05	48	A0A075B7D0	IGHV1OR15-1	Immunoglobulin heavy variable 1/OR15-1 (non-functional) (Fragment)	A0A075B7D0_HUMAN	1	215	3.15	Dengue	QC	NaN	NaN	NaN	25.8297	0.353044
Dengue / QC	_SQIFSTASDNQPTVTIK_	P11021	1.46259	1.46259	3.87309e-05	5.11017e-05	20	P11021	HSPA5	78 kDa glucose-regulated protein	GRP78_HUMAN	1	175.603	2.75603	Dengue	QC	NaN	NaN	NaN	9.36154	0.255721
Dengue / QC	_ILLQGTPVAQM[Oxidation (M)]TEDAVDAER_	P01024	-0.492515	0.492515	3.99913e-05	5.25832e-05	172	P01024	C3	Complement C3	CO3_HUMAN	1	-28.9215	0.710785	Dengue	QC	NaN	NaN	NaN	36.727	0.129455
Dengue / QC	_GRFTISRDNSK_	A0A0J9YVT0;P0DP02	1.11323	1.11323	4.00346e-05	5.26216e-05	30	A0A0J9YVT0;P0DP02	IGHV3-33;IGHV3-30-3	Immunoglobulin heavy variable 3-33 (Fragment);Immunoglobulin heavy variable 3-30-3	A0A0J9YVT0_HUMAN;HVC33_HUMAN	1	116.33	2.1633	Dengue	QC	NaN	NaN	NaN	11.2313	0.287657
Dengue / QC	_LYHSEAFTVNFGDTEEAKK_	P01009	-0.376073	0.376073	4.08918e-05	5.36663e-05	158	P01009	SERPINA1	Alpha-1-antitrypsin	A1AT_HUMAN	1	-22.9468	0.770532	Dengue	QC	NaN	NaN	NaN	63.8796	0.0920517
Dengue / QC	_ETTC[Carbamidomethyl (C)]SKESNEELTESC[Carbamidomethyl (C)]ETK_	P01042	0.717846	0.717846	4.10853e-05	5.38954e-05	72	P01042	KNG1	Kininogen-1	KNG1_HUMAN	1	64.4725	1.64472	Dengue	QC	NaN	NaN	NaN	58.7691	0.160645
Dengue / QC	_EPQVYTLPPSRDELTK_	P01857	-0.932853	0.932853	4.1552e-05	5.44449e-05	170	P01857	IGHG1	Immunoglobulin heavy constant gamma 1	IGHG1_HUMAN	1	-47.6178	0.523822	Dengue	QC	NaN	NaN	NaN	46.0644	0.195188
Dengue / QC	_MC[Carbamidomethyl (C)]SFPFVK_	Q9BXR6	0.793486	0.793486	4.17537e-05	5.46965e-05	38	Q9BXR6	CFHR5	Complement factor H-related protein 5	FHR5_HUMAN	1	73.3258	1.73326	Dengue	QC	NaN	NaN	NaN	30.1096	0.16203
Dengue / QC	_DSVTETLPR_	P03951	0.787101	0.787101	4.1882e-05	5.48393e-05	38	P03951	F11	Coagulation factor XI	FA11_HUMAN	1	72.5603	1.7256	Dengue	QC	NaN	NaN	NaN	25.906	0.1644
Dengue / QC	_GQWGTVC[Carbamidomethyl (C)]DNLWDLTDASVVC[Carbamidomethyl (C)]R_	Q08380	0.834778	0.834778	4.2312e-05	5.52623e-05	120	Q08380	LGALS3BP	Galectin-3-binding protein	LG3BP_HUMAN	1	78.3582	1.78358	Dengue	QC	NaN	NaN	NaN	82.0104	0.16672
Dengue / QC	_AREDIFMETLK_	P25311	-0.256474	0.256474	4.23795e-05	5.5325e-05	166	P25311	AZGP1	Zinc-alpha-2-glycoprotein	ZA2G_HUMAN	1	-16.2869	0.837131	Dengue	QC	NaN	NaN	NaN	73.5819	0.0686739
Dengue / QC	_VTITADESTSTAYMELSSLR_	A0A0B4J2H0	0.645816	0.645816	4.24242e-05	5.53509e-05	116	A0A0B4J2H0	IGHV1-69D	Immunoglobulin heavy variable 1-69D	HV69D_HUMAN	1	56.4624	1.56462	Dengue	QC	NaN	NaN	NaN	79.7015	0.145182
Dengue / QC	_AHFSPSNIILDFPAAGSAAR_	O00391	0.593148	0.593148	4.27066e-05	5.56753e-05	54	O00391	QSOX1	Sulfhydryl oxidase 1	QSOX1_HUMAN	1	50.8534	1.50853	Dengue	QC	NaN	NaN	NaN	44.5857	0.138808
Dengue / QC	_QHQLGVWPLLPGSFK_	A0A0A0MRJ7;P12259	0.475477	0.475477	4.40955e-05	5.73151e-05	18	A0A0A0MRJ7;P12259	F5	Coagulation factor V	A0A0A0MRJ7_HUMAN;FA5_HUMAN	1	39.0378	1.39038	Dengue	QC	NaN	NaN	NaN	11.8912	0.124165
Dengue / QC	_VGSDSVQC[Carbamidomethyl (C)]YQFGWSPNFPTC[Carbamidomethyl (C)]K_	Q9BXR6	0.860885	0.860885	4.48729e-05	5.82722e-05	32	Q9BXR6	CFHR5	Complement factor H-related protein 5	FHR5_HUMAN	1	81.6152	1.81615	Dengue	QC	NaN	NaN	NaN	23.5957	0.207252
Dengue / QC	_LQVVPVAANQR_	A0A087X0I0;A0A140T8Y3;A0A140T8Z8;A0A140T9C0;A0A140T9L7;A0A140TA41;A0A140TA52;P22105;P22105-3;P22105-4	0.209146	0.209146	4.49399e-05	5.83326e-05	72	A0A087X0I0;A0A140T8Y3;A0A140T8Z8;A0A140T9C0;A0A140T9L7;A0A140TA41;A0A140TA52;P22105;P22105-3;P22105-4	TNXB	Tenascin-X;Tenascin-X;Tenascin-X (Fragment);Tenascin-X;Tenascin-X (Fragment);Tenascin-X;Tenascin-X;Tenascin-X;Isoform 4 of Tenascin-X;Isoform 5 of Tenascin-X	A0A087X0I0_HUMAN;A0A140T8Y3_HUMAN;A0A140T8Z8_HUMAN;A0A140T9C0_HUMAN;A0A140T9L7_HUMAN;A0A140TA41_HUMAN;A0A140TA52_HUMAN;TENX_HUMAN;TENX_HUMAN;TENX_HUMAN	1	15.6004	1.156	Dengue	QC	NaN	NaN	NaN	46.7144	0.171293
Dengue / QC	_QAPGKGLEWVGFIR_	A0A0A0MS15	-0.600933	0.600933	4.51876e-05	5.86273e-05	158	A0A0A0MS15	IGHV3-49	Immunoglobulin heavy variable 3-49	HV349_HUMAN	1	-34.0673	0.659327	Dengue	QC	NaN	NaN	NaN	48.5894	0.142534
Dengue / QC	_LDVPVWDVEATLNFLK_	O00391	0.630207	0.630207	4.52185e-05	5.8654e-05	56	O00391	QSOX1	Sulfhydryl oxidase 1	QSOX1_HUMAN	1	54.7787	1.54779	Dengue	QC	NaN	NaN	NaN	9.05639	0.18529
Dengue / QC	_GKLLIGTVFHK_	P27169	0.517638	0.517638	4.53418e-05	5.88005e-05	136	P27169	PON1	Serum paraoxonase/arylesterase 1	PON1_HUMAN	1	43.1609	1.43161	Dengue	QC	NaN	NaN	NaN	63.7413	0.0910909
Dengue / QC	_MQKEITALAPSTMK_	P60709	1.53248	1.53248	4.54572e-05	5.89099e-05	64	P60709	ACTB	Actin, cytoplasmic 1	ACTB_HUMAN	1	189.283	2.89283	Dengue	QC	NaN	NaN	NaN	37.3432	0.296166
Dengue / QC	_FNHLGHIFTFTPQNNEFQLQLSPK_	P04275	0.835979	0.835979	4.56643e-05	5.91513e-05	50	P04275	VWF	von Willebrand factor	VWF_HUMAN	1	78.5068	1.78507	Dengue	QC	NaN	NaN	NaN	42.0725	0.226567
Dengue / QC	_TQVNTQAEQLRR_	P06727	0.761659	0.761659	4.57193e-05	5.91955e-05	70	P06727	APOA4	Apolipoprotein A-IV	APOA4_HUMAN	1	69.5439	1.69544	Dengue	QC	NaN	NaN	NaN	53.2263	0.182433
Dengue / QC	_NTFAEVTGLSPGVTYYFKVFAVSHGR_	P02751;P02751-15;P02751-3;P02751-7	0.588403	0.588403	4.58299e-05	5.92982e-05	66	P02751;P02751-15;P02751-3;P02751-7	FN1	Fibronectin;Isoform 15 of Fibronectin;Isoform 3 of Fibronectin;Isoform 7 of Fibronectin	FINC_HUMAN	1	50.3581	1.50358	Dengue	QC	NaN	NaN	NaN	29.3669	0.103376
Dengue / QC	_ITPLEIEVLEETVQTMDTS_	Q99436	1.40568	1.40568	4.58288e-05	5.92982e-05	10	Q99436	PSMB7	Proteasome subunit beta type-7	PSB7_HUMAN	1	164.943	2.64943	Dengue	QC	NaN	NaN	NaN	4.15815	0.110986
Dengue / QC	_STSPPKQAEAVLK_	P04114	0.2526	0.2526	4.59717e-05	5.94547e-05	120	P04114	APOB	Apolipoprotein B-100	APOB_HUMAN	1	19.1353	1.19135	Dengue	QC	NaN	NaN	NaN	57.3323	0.105912
Dengue / QC	_C[Carbamidomethyl (C)]VC[Carbamidomethyl (C)]LLPPQC[Carbamidomethyl (C)]FK_	P13671	0.468933	0.468933	4.61624e-05	5.96741e-05	112	P13671	C6	Complement component C6	CO6_HUMAN	1	38.4085	1.38409	Dengue	QC	NaN	NaN	NaN	75.5188	0.0853715
Dengue / QC	_LKMLEVPYVDR_	P00742	0.948259	0.948259	4.65522e-05	6.01096e-05	48	P00742	F10	Coagulation factor X	FA10_HUMAN	1	92.9543	1.92954	Dengue	QC	NaN	NaN	NaN	29.7881	0.158933
Dengue / QC	_SFMLLILER_	P05543	0.339836	0.339836	4.65908e-05	6.01458e-05	74	P05543	SERPINA7	Thyroxine-binding globulin	THBG_HUMAN	1	26.5613	1.26561	Dengue	QC	NaN	NaN	NaN	27.8484	0.184591
Dengue / QC	_LPYTIITTPPLKDFSLWEK_	P04114	0.61339	0.61339	4.68445e-05	6.04596e-05	108	P04114	APOB	Apolipoprotein B-100	APOB_HUMAN	1	52.9849	1.52985	Dengue	QC	NaN	NaN	NaN	74.9227	0.102962
Dengue / QC	_ELRYDSTC[Carbamidomethyl (C)]ER_	P07357	1.71375	1.71375	4.68596e-05	6.04654e-05	34	P07357	C8A	Complement component C8 alpha chain	CO8A_HUMAN	1	228.013	3.28013	Dengue	QC	NaN	NaN	NaN	25.3965	0.316898
Dengue / QC	_MALEVYK_	P04003	-0.313446	0.313446	4.71916e-05	6.08247e-05	176	P04003	C4BPA	C4b-binding protein alpha chain	C4BPA_HUMAN	1	-19.5282	0.804718	Dengue	QC	NaN	NaN	NaN	41.9947	0.0792763
Dengue / QC	_ETDIEDSDDIPEDTTYKK_	A0A0A0MRJ7;P12259	0.304145	0.304145	4.78959e-05	6.16486e-05	110	A0A0A0MRJ7;P12259	F5	Coagulation factor V	A0A0A0MRJ7_HUMAN;FA5_HUMAN	1	23.4686	1.23469	Dengue	QC	NaN	NaN	NaN	47.8389	0.103788
Dengue / QC	_VALIC[Carbamidomethyl (C)]LPPEWYVVPPGTK_	G3XAK1;P26927	1.66894	1.66894	4.85867e-05	6.24529e-05	14	G3XAK1;P26927	MST1	Hepatocyte growth factor-like protein	G3XAK1_HUMAN;HGFL_HUMAN	1	217.982	3.17982	Dengue	QC	NaN	NaN	NaN	4.41632	0.416274
Dengue / QC	_GQESSTDIKAPEGFAVR_	Q9NZP8	-0.436616	0.436616	4.89409e-05	6.28939e-05	138	Q9NZP8	C1RL	Complement C1r subcomponent-like protein	C1RL_HUMAN	1	-26.1134	0.738866	Dengue	QC	NaN	NaN	NaN	52.033	0.0944768
Dengue / QC	_ATFQTPDFIVPLTDLR_	P04114	1.39342	1.39342	4.89716e-05	6.29192e-05	22	P04114	APOB	Apolipoprotein B-100	APOB_HUMAN	1	162.7	2.627	Dengue	QC	NaN	NaN	NaN	8.84365	0.478845
Dengue / QC	_VQYEC[Carbamidomethyl (C)]ATGYYTAGGKK_	P05160	0.515747	0.515747	4.91781e-05	6.31132e-05	90	P05160	F13B	Coagulation factor XIII B chain	F13B_HUMAN	1	42.9734	1.42973	Dengue	QC	NaN	NaN	NaN	37.1622	0.10654
Dengue / QC	_NFATSNK_	P04114	1.98714	1.98714	4.92258e-05	6.31601e-05	24	P04114	APOB	Apolipoprotein B-100	APOB_HUMAN	1	296.45	3.9645	Dengue	QC	NaN	NaN	NaN	14.3204	0.360833
Dengue / QC	_NPDSGKQPWC[Carbamidomethyl (C)]YTTDPC[Carbamidomethyl (C)]VR_	P08519	2.62935	2.62935	4.95361e-05	6.35153e-05	56	P08519	LPA	Apolipoprotein(a)	APOA_HUMAN	1	518.748	6.18748	Dengue	QC	NaN	NaN	NaN	27.5746	0.393186
Dengue / QC	_KLYDYC[Carbamidomethyl (C)]DVPQC[Carbamidomethyl (C)]AAPSFDC[Carbamidomethyl (C)]GKPQVEPK_	P00747	0.361877	0.361877	5.02097e-05	6.42196e-05	176	P00747	PLG	Plasminogen	PLMN_HUMAN	1	28.5097	1.2851	Dengue	QC	NaN	NaN	NaN	137.187	0.0737899
Dengue / QC	_ESDEETQIKVNWEEEAASGLLTSLKDNVPK_	P04114	1.69109	1.69109	5.02295e-05	6.42304e-05	20	P04114	APOB	Apolipoprotein B-100	APOB_HUMAN	1	222.9	3.229	Dengue	QC	NaN	NaN	NaN	6.24648	0.226472
Dengue / QC	_TFPEIQR_	A0A0A0MS09;P01880;P01880-2	0.778609	0.778609	5.04672e-05	6.44849e-05	106	A0A0A0MS09;P01880;P01880-2	IGHD	Immunoglobulin heavy constant delta (Fragment);Immunoglobulin heavy constant delta;Isoform 2 of Immunoglobulin heavy constant delta	A0A0A0MS09_HUMAN;IGHD_HUMAN;IGHD_HUMAN	1	71.5476	1.71548	Dengue	QC	NaN	NaN	NaN	71.3361	0.146714
Dengue / QC	_SLHDPDGLVATYISEVHEHDGHLYLGSFR_	H0Y512;Q9HDC9	0.572332	0.572332	5.04755e-05	6.44849e-05	64	H0Y512;Q9HDC9	APMAP	Adipocyte plasma membrane-associated protein (Fragment);Adipocyte plasma membrane-associated protein	H0Y512_HUMAN;APMAP_HUMAN	1	48.6925	1.48693	Dengue	QC	NaN	NaN	NaN	37.7823	0.19399
Dengue / QC	_AFIQLWAFDAVKGK_	P02760	1.5052	1.5052	5.07086e-05	6.47557e-05	124	P02760	AMBP	Protein AMBP	AMBP_HUMAN	1	183.864	2.83864	Dengue	QC	NaN	NaN	NaN	84.2576	0.21579
Dengue / QC	_LKC[Carbamidomethyl (C)]LAYDFYPGKIDVHWTR_	P25311	2.70523	2.70523	5.08176e-05	6.48803e-05	66	P25311	AZGP1	Zinc-alpha-2-glycoprotein	ZA2G_HUMAN	1	552.163	6.52163	Dengue	QC	NaN	NaN	NaN	48.7438	0.440383
Dengue / QC	_TATSEYQTFFNPR_	P00734	0.903403	0.903403	5.0878e-05	6.49137e-05	174	P00734	F2	Prothrombin	THRB_HUMAN	1	87.0473	1.87047	Dengue	QC	NaN	NaN	NaN	154.198	0.219635
Dengue / QC	_YEKPGSPPREVVPR_	P02751;P02751-15;P02751-3;P02751-7	0.725462	0.725462	5.12273e-05	6.52761e-05	34	P02751;P02751-15;P02751-3;P02751-7	FN1	Fibronectin;Isoform 15 of Fibronectin;Isoform 3 of Fibronectin;Isoform 7 of Fibronectin	FINC_HUMAN	1	65.343	1.65343	Dengue	QC	NaN	NaN	NaN	18.4257	0.177358
Dengue / QC	_GFLLWYSGR_	Q15113	1.12022	1.12022	5.1231e-05	6.52761e-05	32	Q15113	PCOLCE	Procollagen C-endopeptidase enhancer 1	PCOC1_HUMAN	1	117.381	2.17381	Dengue	QC	NaN	NaN	NaN	7.87003	0.206145
Dengue / QC	_EINLAPDSSSVVVSGLMVATK_	P02751;P02751-15;P02751-3;P02751-7	0.497565	0.497565	5.13737e-05	6.54287e-05	132	P02751;P02751-15;P02751-3;P02751-7	FN1	Fibronectin;Isoform 15 of Fibronectin;Isoform 3 of Fibronectin;Isoform 7 of Fibronectin	FINC_HUMAN	1	41.1829	1.41183	Dengue	QC	NaN	NaN	NaN	102.768	0.154693
Dengue / QC	_MYSVNGYTFGSLPGLSMC[Carbamidomethyl (C)]AEDR_	P00450	0.458932	0.458932	5.14302e-05	6.5486e-05	134	P00450	CP	Ceruloplasmin	CERU_HUMAN	1	37.4524	1.37452	Dengue	QC	NaN	NaN	NaN	79.791	0.131089
Dengue / QC	_KHYLMWGLSSDFWGEKPNLSYIIGK_	P01024	0.509337	0.509337	5.15756e-05	6.56416e-05	172	P01024	C3	Complement C3	CO3_HUMAN	1	42.3396	1.4234	Dengue	QC	NaN	NaN	NaN	99.3389	0.0987335
Dengue / QC	_IMNGEADAM[Oxidation (M)]SLDGGFVYIAGK_	P02787	1.0848	1.0848	5.16667e-05	6.57282e-05	112	P02787	TF	Serotransferrin	TRFE_HUMAN	1	112.108	2.12108	Dengue	QC	NaN	NaN	NaN	73.6564	0.137369
Dengue / QC	_ATLELSPWQMSALVQVHASQPSSFHDFPDLGQEVALNANTK_	P04114	0.725682	0.725682	5.21415e-05	6.63025e-05	66	P04114	APOB	Apolipoprotein B-100	APOB_HUMAN	1	65.3682	1.65368	Dengue	QC	NaN	NaN	NaN	36.5268	0.209169
Dengue / QC	_LAAYLMLMR_	P04114	0.408276	0.408276	5.24246e-05	6.66029e-05	134	P04114	APOB	Apolipoprotein B-100	APOB_HUMAN	1	32.7099	1.3271	Dengue	QC	NaN	NaN	NaN	80.6846	0.106237
Dengue / QC	_TPDGSLLVR_	Q9Y6R7	0.58897	0.58897	5.25196e-05	6.67087e-05	98	Q9Y6R7	FCGBP	IgGFc-binding protein	FCGBP_HUMAN	1	50.4173	1.50417	Dengue	QC	NaN	NaN	NaN	78.2494	0.162554
Dengue / QC	_TRFVYHLSDLC[Carbamidomethyl (C)]K_	P01591	0.974852	0.974852	5.25797e-05	6.67552e-05	134	P01591	JCHAIN	Immunoglobulin J chain	IGJ_HUMAN	1	96.544	1.96544	Dengue	QC	NaN	NaN	NaN	116.944	0.197885
Dengue / QC	_ALPVFC[Carbamidomethyl (C)]DMDTEGGGWLVFQR_	O75636	0.884865	0.884865	5.25693e-05	6.67552e-05	44	O75636	FCN3	Ficolin-3	FCN3_HUMAN	1	84.6592	1.84659	Dengue	QC	NaN	NaN	NaN	25.8039	0.223699
Dengue / QC	_DVMQGTDEHVVC[Carbamidomethyl (C)]K_	P01871	-0.327194	0.327194	5.27294e-05	6.69154e-05	154	P01871	IGHM	Immunoglobulin heavy constant mu	IGHM_HUMAN	1	-20.2915	0.797085	Dengue	QC	NaN	NaN	NaN	85.328	0.0816305
Dengue / QC	_HLSQDTGSPSGMRPWEDLPSQDTGSPSR_	A0A0A0MRJ7;P12259	0.451813	0.451813	5.28649e-05	6.70724e-05	56	A0A0A0MRJ7;P12259	F5	Coagulation factor V	A0A0A0MRJ7_HUMAN;FA5_HUMAN	1	36.7758	1.36776	Dengue	QC	NaN	NaN	NaN	39.1571	0.135445
Dengue / QC	_EVTVPVFYPTEK_	P43121	0.564421	0.564421	5.32147e-05	6.7486e-05	48	P43121	MCAM	Cell surface glycoprotein MUC18	MUC18_HUMAN	1	47.8794	1.47879	Dengue	QC	NaN	NaN	NaN	14.6223	0.124001
Dengue / QC	_TVAAPSVFIFPPSDEQLKSGTASVVC[Carbamidomethyl (C)]LLNNFYPR_	P01834	0.400748	0.400748	5.32954e-05	6.75733e-05	176	P01834	IGKC	Immunoglobulin kappa constant	IGKC_HUMAN	1	32.0192	1.32019	Dengue	QC	NaN	NaN	NaN	76.3621	0.111954
Dengue / QC	_FTNIGPDTM[Oxidation (M)]R_	P02751;P02751-15;P02751-3;P02751-7	1.61837	1.61837	5.37014e-05	6.80122e-05	18	P02751;P02751-15;P02751-3;P02751-7	FN1	Fibronectin;Isoform 15 of Fibronectin;Isoform 3 of Fibronectin;Isoform 7 of Fibronectin	FINC_HUMAN	1	207.029	3.07029	Dengue	QC	NaN	NaN	NaN	10.9633	0.32891
Dengue / QC	_NVGNTC[Carbamidomethyl (C)]WFSAVIQEKR_	H0YFX3	0.804314	0.804314	5.4103e-05	6.84727e-05	102	H0YFX3	USP28	Ubiquitin carboxyl-terminal hydrolase 28 (Fragment)	H0YFX3_HUMAN	1	74.6315	1.74631	Dengue	QC	NaN	NaN	NaN	97.7187	0.159986
Dengue / QC	_ISASAEELR_	P06727	0.412783	0.412783	5.42802e-05	6.86688e-05	166	P06727	APOA4	Apolipoprotein A-IV	APOA4_HUMAN	1	33.1251	1.33125	Dengue	QC	NaN	NaN	NaN	160.446	0.0936407
Dengue / QC	_FDSDAASQR_	P05534;P30447	2.81427	2.81427	5.45104e-05	6.89293e-05	18	P05534;P30447	HLA-A	HLA class I histocompatibility antigen, A-24 alpha chain;HLA class I histocompatibility antigen, A-23 alpha chain	1A24_HUMAN;1A23_HUMAN	1	603.365	7.03365	Dengue	QC	NaN	NaN	NaN	6.6436	0.269475
Dengue / QC	_WSSPPVC[Carbamidomethyl (C)]LEPC[Carbamidomethyl (C)]TVNVDYMNR_	P05160	0.44588	0.44588	5.60256e-05	7.07194e-05	68	P05160	F13B	Coagulation factor XIII B chain	F13B_HUMAN	1	36.2144	1.36214	Dengue	QC	NaN	NaN	NaN	20.6599	0.112975
Dengue / QC	_TYMLAFDVNDEKNWGLSVYADKPETTK_	P02763	0.3745	0.3745	5.62133e-05	7.09091e-05	172	P02763	ORM1	Alpha-1-acid glycoprotein 1	A1AG1_HUMAN	1	29.639	1.29639	Dengue	QC	NaN	NaN	NaN	131.361	0.0975167
Dengue / QC	_FLLKAEPLAFTFSHDYK_	P04114	1.30173	1.30173	5.6351e-05	7.10513e-05	22	P04114	APOB	Apolipoprotein B-100	APOB_HUMAN	1	146.525	2.46525	Dengue	QC	NaN	NaN	NaN	16.5489	0.20224
Dengue / QC	_VAAEDWK_	A0A0G2JMB2	-0.405913	0.405913	5.68327e-05	7.16269e-05	176	A0A0G2JMB2	IGHA2	Immunoglobulin heavy constant alpha 2 (Fragment)	A0A0G2JMB2_HUMAN	1	-24.5242	0.754758	Dengue	QC	NaN	NaN	NaN	88.7152	0.0952677
Dengue / QC	_YYTYLIMNK_	P01024	-0.317802	0.317802	5.68793e-05	7.16588e-05	170	P01024	C3	Complement C3	CO3_HUMAN	1	-19.7709	0.802291	Dengue	QC	NaN	NaN	NaN	84.3892	0.0768598
Dengue / QC	_C[Carbamidomethyl (C)]GLVPVLAENYK_	E7ER44;P02788	0.832609	0.832609	5.68833e-05	7.16588e-05	48	E7ER44;P02788	LTF	Lactotransferrin	E7ER44_HUMAN;TRFL_HUMAN	1	78.0903	1.7809	Dengue	QC	NaN	NaN	NaN	38.9909	0.207944
Dengue / QC	_IALGGLLFPASNLR_	I3L145;P04278	1.14338	1.14338	5.7209e-05	7.20053e-05	54	I3L145;P04278	SHBG	Sex hormone-binding globulin	I3L145_HUMAN;SHBG_HUMAN	1	120.899	2.20899	Dengue	QC	NaN	NaN	NaN	30.1442	0.266484
Dengue / QC	_VLVDHFGYTK_	P04114	-0.368688	0.368688	5.72899e-05	7.20412e-05	148	P04114	APOB	Apolipoprotein B-100	APOB_HUMAN	1	-22.5513	0.774487	Dengue	QC	NaN	NaN	NaN	51.0998	0.0931365
Dengue / QC	_C[Carbamidomethyl (C)]VEISC[Carbamidomethyl (C)]KSPDVINGSPISQK_	P08603	0.678617	0.678617	5.74708e-05	7.22228e-05	162	P08603	CFH	Complement factor H	CFAH_HUMAN	1	60.0604	1.6006	Dengue	QC	NaN	NaN	NaN	145.894	0.13828
Dengue / QC	_GISMLNK_	Q06033;Q06033-2	-0.457135	0.457135	5.75662e-05	7.23267e-05	176	Q06033;Q06033-2	ITIH3	Inter-alpha-trypsin inhibitor heavy chain H3;Isoform 2 of Inter-alpha-trypsin inhibitor heavy chain H3	ITIH3_HUMAN	1	-27.1569	0.728431	Dengue	QC	NaN	NaN	NaN	67.77	0.0964846
Dengue / QC	_GLEWMGGFDPEDGETIYAQK_	A0A0C4DH33	0.705079	0.705079	5.76608e-05	7.24296e-05	46	A0A0C4DH33	IGHV1-24	Immunoglobulin heavy variable 1-24	HV124_HUMAN	1	63.0234	1.63023	Dengue	QC	NaN	NaN	NaN	38.7964	0.207185
Dengue / QC	_SEDTATYYC[Carbamidomethyl (C)]AR_	A0A075B7D0	1.21146	1.21146	5.77523e-05	7.25285e-05	146	A0A075B7D0	IGHV1OR15-1	Immunoglobulin heavy variable 1/OR15-1 (non-functional) (Fragment)	A0A075B7D0_HUMAN	1	131.571	2.31571	Dengue	QC	NaN	NaN	NaN	68.4596	0.20214
Dengue / QC	_TPC[Carbamidomethyl (C)]TVSC[Carbamidomethyl (C)]NIPVVSGKEC[Carbamidomethyl (C)]EEIIR_	P02675	1.57837	1.57837	5.78168e-05	7.25935e-05	126	P02675	FGB	Fibrinogen beta chain	FIBB_HUMAN	1	198.633	2.98633	Dengue	QC	NaN	NaN	NaN	120.785	0.356217
Dengue / QC	_EHLVQATPENLQEAR_	Q06033;Q06033-2	-0.557683	0.557683	5.86201e-05	7.35371e-05	160	Q06033;Q06033-2	ITIH3	Inter-alpha-trypsin inhibitor heavy chain H3;Isoform 2 of Inter-alpha-trypsin inhibitor heavy chain H3	ITIH3_HUMAN	1	-32.0608	0.679392	Dengue	QC	NaN	NaN	NaN	39.9653	0.152748
Dengue / QC	_AAANQMR_	P0C0L5	1.47651	1.47651	5.88122e-05	7.37292e-05	36	P0C0L5	C4B	Complement C4-B	CO4B_HUMAN	1	178.276	2.78276	Dengue	QC	NaN	NaN	NaN	23.8863	0.27637
Dengue / QC	_LASVSVSR_	Q9Y6R7	1.17374	1.17374	5.89576e-05	7.38789e-05	32	Q9Y6R7	FCGBP	IgGFc-binding protein	FCGBP_HUMAN	1	125.596	2.25596	Dengue	QC	NaN	NaN	NaN	26.0973	0.256562
Dengue / QC	_TRFISLGEAC[Carbamidomethyl (C)]KK_	P01024	1.40909	1.40909	6.00021e-05	7.5105e-05	44	P01024	C3	Complement C3	CO3_HUMAN	1	165.569	2.65569	Dengue	QC	NaN	NaN	NaN	32.1072	0.278072
Dengue / QC	_VNPFRPGDSEPPPAPGAQR_	H0Y2Y8;Q15942	0.471194	0.471194	6.00614e-05	7.51627e-05	42	H0Y2Y8;Q15942	ZYX	Zyxin (Fragment);Zyxin	H0Y2Y8_HUMAN;ZYX_HUMAN	1	38.6256	1.38626	Dengue	QC	NaN	NaN	NaN	33.1149	0.13637
Dengue / QC	_WKC[Carbamidomethyl (C)]DPVDQC[Carbamidomethyl (C)]QDSETGTFYQIGDSWEK_	P02751;P02751-15;P02751-3;P02751-7	0.470078	0.470078	6.0356e-05	7.55147e-05	164	P02751;P02751-15;P02751-3;P02751-7	FN1	Fibronectin;Isoform 15 of Fibronectin;Isoform 3 of Fibronectin;Isoform 7 of Fibronectin	FINC_HUMAN	1	38.5184	1.38518	Dengue	QC	NaN	NaN	NaN	115.634	0.0952004
Dengue / QC	_GNQGFNNNWLR_	A0A0C4DFP6;Q9NQ79;Q9NQ79-2	0.775727	0.775727	6.05268e-05	7.57118e-05	44	A0A0C4DFP6;Q9NQ79;Q9NQ79-2	CRTAC1	Cartilage acidic protein 1;Cartilage acidic protein 1;Isoform 2 of Cartilage acidic protein 1	A0A0C4DFP6_HUMAN;CRAC1_HUMAN;CRAC1_HUMAN	1	71.2052	1.71205	Dengue	QC	NaN	NaN	NaN	13.899	0.114864
Dengue / QC	_YEVSVYALK_	P02751;P02751-15;P02751-3;P02751-7	0.433139	0.433139	6.14364e-05	7.67482e-05	114	P02751;P02751-15;P02751-3;P02751-7	FN1	Fibronectin;Isoform 15 of Fibronectin;Isoform 3 of Fibronectin;Isoform 7 of Fibronectin	FINC_HUMAN	1	35.0168	1.35017	Dengue	QC	NaN	NaN	NaN	108.442	0.108649
Dengue / QC	_C[Carbamidomethyl (C)]KSSNLIILEEHLK_	P08603	0.977782	0.977782	6.15638e-05	7.68736e-05	120	P08603	CFH	Complement factor H	CFAH_HUMAN	1	96.9435	1.96944	Dengue	QC	NaN	NaN	NaN	107.952	0.18443
Dengue / QC	_RNHMQYEIVIK_	P19827	0.39431	0.39431	6.21878e-05	7.75676e-05	56	P19827	ITIH1	Inter-alpha-trypsin inhibitor heavy chain H1	ITIH1_HUMAN	1	31.4314	1.31431	Dengue	QC	NaN	NaN	NaN	35.1609	0.128801
Dengue / QC	_LVNGQSHISLSKAEFQDALEKLNMGITDLQGLR_	P0C0L5	0.453031	0.453031	6.22052e-05	7.75722e-05	148	P0C0L5	C4B	Complement C4-B	CO4B_HUMAN	1	36.8913	1.36891	Dengue	QC	NaN	NaN	NaN	52.7508	0.116233
Dengue / QC	_IEGNLIFDPNNYLPKESMLK_	P04114	0.700205	0.700205	6.34775e-05	7.90202e-05	72	P04114	APOB	Apolipoprotein B-100	APOB_HUMAN	1	62.4736	1.62474	Dengue	QC	NaN	NaN	NaN	48.5101	0.133683
Dengue / QC	_AIHLDLEEYR_	Q96KN2	0.390924	0.390924	6.35612e-05	7.9107e-05	88	Q96KN2	CNDP1	Beta-Ala-His dipeptidase	CNDP1_HUMAN	1	31.1233	1.31123	Dengue	QC	NaN	NaN	NaN	79.0128	0.103095
Dengue / QC	_LFDEINPETK_	G3V2W1;Q9UK55	0.275346	0.275346	6.38226e-05	7.93977e-05	60	G3V2W1;Q9UK55	SERPINA10	Protein Z-dependent protease inhibitor	G3V2W1_HUMAN;ZPI_HUMAN	1	21.0284	1.21028	Dengue	QC	NaN	NaN	NaN	21.1723	0.108013
Dengue / QC	_LLLFSEVR_	F5H0G0;Q6P2Q0;Q9NP78;Q9NP78-2;Q9NP78-3;Q9NP78-5;Q9NP78-6;Q9NP78-7	2.44133	2.44133	6.48945e-05	8.059e-05	34	F5H0G0;Q6P2Q0;Q9NP78;Q9NP78-2;Q9NP78-3;Q9NP78-5;Q9NP78-6;Q9NP78-7	ABCB9	ATP-binding cassette sub-family B member 9;ABCB9 protein;ATP-binding cassette sub-family B member 9;Isoform 2 of ATP-binding cassette sub-family B member 9;Isoform 3 of ATP-binding cassette sub-family B member 9;Isoform 4 of ATP-binding cassette sub-family B member 9;Isoform 5 of ATP-binding cassette sub-family B member 9;Isoform 6 of ATP-binding cassette sub-family B member 9	F5H0G0_HUMAN;Q6P2Q0_HUMAN;ABCB9_HUMAN;ABCB9_HUMAN;ABCB9_HUMAN;ABCB9_HUMAN;ABCB9_HUMAN;ABCB9_HUMAN	1	443.141	5.43141	Dengue	QC	NaN	NaN	NaN	14.0984	0.582132
Dengue / QC	_TNLESILSYPKDFTC[Carbamidomethyl (C)]VHQALKGFTTK_	P05155;P05155-3	0.483957	0.483957	6.49906e-05	8.06389e-05	46	P05155;P05155-3	SERPING1	Plasma protease C1 inhibitor;Isoform 3 of Plasma protease C1 inhibitor	IC1_HUMAN	1	39.8575	1.39857	Dengue	QC	NaN	NaN	NaN	41.6871	0.0811759
Dengue / QC	_IEDGFSLKEQLQDMGLVDLFSPEK_	P01008	0.674197	0.674197	6.55133e-05	8.12342e-05	162	P01008	SERPINC1	Antithrombin-III	ANT3_HUMAN	1	59.5708	1.59571	Dengue	QC	NaN	NaN	NaN	35.6882	0.192444
Dengue / QC	_TQPNLDNC[Carbamidomethyl (C)]PFHDQPHLK_	P01034	3.13329	3.13329	6.56137e-05	8.13232e-05	18	P01034	CST3	Cystatin-C	CYTC_HUMAN	1	777.431	8.77431	Dengue	QC	NaN	NaN	NaN	13.3884	0.464132
Dengue / QC	_SLGPNSC[Carbamidomethyl (C)]SANGPGLYLIHGPNLYC[Carbamidomethyl (C)]YSDVEK_	P02790	0.408369	0.408369	6.5918e-05	8.16227e-05	176	P02790	HPX	Hemopexin	HEMO_HUMAN	1	32.7184	1.32718	Dengue	QC	NaN	NaN	NaN	80.4043	0.0715773
Dengue / QC	_AYIFIDEAHITQALIWLSQRQK_	P01023	1.16478	1.16478	6.59229e-05	8.16227e-05	60	P01023	A2M	Alpha-2-macroglobulin	A2MG_HUMAN	1	124.2	2.242	Dengue	QC	NaN	NaN	NaN	20.5517	0.206562
Dengue / QC	_NTLYLQMSSLR_	A0A0J9YX35	-0.437105	0.437105	6.64521e-05	8.2201e-05	170	A0A0J9YX35	IGHV3-64D	Immunoglobulin heavy variable 3-64D	HV64D_HUMAN	1	-26.1385	0.738615	Dengue	QC	NaN	NaN	NaN	77.1994	0.100604
Dengue / QC	_VTITC[Carbamidomethyl (C)]QASQDISNYLNWYQQKPGK_	P01593;P01594	0.382785	0.382785	6.71395e-05	8.29069e-05	102	P01593;P01594	IGKV1D-33;IGKV1-33	Immunoglobulin kappa variable 1D-33;Immunoglobulin kappa variable 1-33	KVD33_HUMAN;KV133_HUMAN	1	30.3857	1.30386	Dengue	QC	NaN	NaN	NaN	85.9999	0.126335
Dengue / QC	_WLQGSQELPREK_	A0A0G2JMB2	-0.500841	0.500841	6.72731e-05	8.30358e-05	174	A0A0G2JMB2	IGHA2	Immunoglobulin heavy constant alpha 2 (Fragment)	A0A0G2JMB2_HUMAN	1	-29.3305	0.706695	Dengue	QC	NaN	NaN	NaN	83.6828	0.116858
Dengue / QC	_LLC[Carbamidomethyl (C)]NGDNDC[Carbamidomethyl (C)]GDQSDEANC[Carbamidomethyl (C)]R_	P07358	0.470208	0.470208	6.77976e-05	8.36288e-05	84	P07358	C8B	Complement component C8 beta chain	CO8B_HUMAN	1	38.5309	1.38531	Dengue	QC	NaN	NaN	NaN	64.0556	0.0988153
Dengue / QC	_TLNQPDSQLQLTTGNGLFLSEGLK_	P01009	0.346637	0.346637	6.81256e-05	8.3997e-05	144	P01009	SERPINA1	Alpha-1-antitrypsin	A1AT_HUMAN	1	27.1593	1.27159	Dengue	QC	NaN	NaN	NaN	139.514	0.0988259
Dengue / QC	_SC[Carbamidomethyl (C)]GLHQLLRGPEVQLVAHSPWLKDSLSR_	P0C0L5	0.673461	0.673461	6.93733e-05	8.53872e-05	168	P0C0L5	C4B	Complement C4-B	CO4B_HUMAN	1	59.4894	1.59489	Dengue	QC	NaN	NaN	NaN	145.236	0.137519
Dengue / QC	_LFDSDPITVTVPVEVSR_	P10909;P10909-2;P10909-4;P10909-5	0.253757	0.253757	6.94891e-05	8.55112e-05	170	P10909;P10909-2;P10909-4;P10909-5	CLU	Clusterin;Isoform 2 of Clusterin;Isoform 4 of Clusterin;Isoform 5 of Clusterin	CLUS_HUMAN	1	19.2308	1.19231	Dengue	QC	NaN	NaN	NaN	117.367	0.0735476
Dengue / QC	_QQTHMLDVMQDHFSR_	P10909;P10909-2;P10909-4;P10909-5	-0.347864	0.347864	6.97071e-05	8.57238e-05	138	P10909;P10909-2;P10909-4;P10909-5	CLU	Clusterin;Isoform 2 of Clusterin;Isoform 4 of Clusterin;Isoform 5 of Clusterin	CLUS_HUMAN	1	-21.4253	0.785747	Dengue	QC	NaN	NaN	NaN	68.3321	0.0777603
Dengue / QC	_GETFSC[Carbamidomethyl (C)]MVGHEALPLAFTQK_	A0A286YEY5;P01877	-0.0766139	0.0766139	7.00158e-05	8.60479e-05	144	A0A286YEY5;P01877	IGHA2	Immunoglobulin heavy constant alpha 2 (Fragment);Immunoglobulin heavy constant alpha 2	A0A286YEY5_HUMAN;IGHA2_HUMAN	1	-5.17193	0.948281	Dengue	QC	NaN	NaN	NaN	83.6204	0.282489
Dengue / QC	_KC[Carbamidomethyl (C)]QC[Carbamidomethyl (C)]DELC[Carbamidomethyl (C)]SYYQSC[Carbamidomethyl (C)]C[Carbamidomethyl (C)]TDYTAEC[Carbamidomethyl (C)]KPQVTR_	P04004	0.292651	0.292651	7.00161e-05	8.60479e-05	58	P04004	VTN	Vitronectin	VTNC_HUMAN	1	22.4889	1.22489	Dengue	QC	NaN	NaN	NaN	15.1231	0.0823668
Dengue / QC	_FTISTDNSK_	A0A075B7B8	0.836958	0.836958	7.02871e-05	8.63623e-05	16	A0A075B7B8	IGHV3OR16-12	Immunoglobulin heavy variable 3/OR16-12 (non-functional) (Fragment)	A0A075B7B8_HUMAN	1	78.628	1.78628	Dengue	QC	NaN	NaN	NaN	10.2903	0.16457
Dengue / QC	_NGQWSEPPKC[Carbamidomethyl (C)]LHPC[Carbamidomethyl (C)]VISR_	P08603	0.580427	0.580427	7.06289e-05	8.67251e-05	152	P08603	CFH	Complement factor H	CFAH_HUMAN	1	49.5292	1.49529	Dengue	QC	NaN	NaN	NaN	111.477	0.0988927
Dengue / QC	_SSSNEEVMFLTVQVKGPTQEFK_	P01023	0.993798	0.993798	7.07921e-05	8.68889e-05	74	P01023	A2M	Alpha-2-macroglobulin	A2MG_HUMAN	1	99.1421	1.99142	Dengue	QC	NaN	NaN	NaN	57.3378	0.175638
Dengue / QC	_FTNIGPDTMR_	P02751;P02751-15;P02751-3;P02751-7	0.194948	0.194948	7.37218e-05	9.00375e-05	160	P02751;P02751-15;P02751-3;P02751-7	FN1	Fibronectin;Isoform 15 of Fibronectin;Isoform 3 of Fibronectin;Isoform 7 of Fibronectin	FINC_HUMAN	1	14.4683	1.14468	Dengue	QC	NaN	NaN	NaN	119.918	0.0747871
Dengue / QC	_ASQSVSSYLAWY[Sulfation (Y)]QQKPGQAPR_	P04433	-0.865636	0.865636	7.42134e-05	9.05212e-05	86	P04433	IGKV3-11	Immunoglobulin kappa variable 3-11	KV311_HUMAN	1	-45.1196	0.548804	Dengue	QC	NaN	NaN	NaN	7.30252	0.629432
Dengue / QC	_FQSVFTVTR_	P02747	-0.294381	0.294381	7.42912e-05	9.05773e-05	176	P02747	C1QC	Complement C1q subcomponent subunit C	C1QC_HUMAN	1	-18.4578	0.815422	Dengue	QC	NaN	NaN	NaN	52.2545	0.0672338
Dengue / QC	_VNGVLTALPVSVADGR_	Q9Y6R7	0.557702	0.557702	7.44542e-05	9.07565e-05	88	Q9Y6R7	FCGBP	IgGFc-binding protein	FCGBP_HUMAN	1	47.1923	1.47192	Dengue	QC	NaN	NaN	NaN	82.814	0.147569
Dengue / QC	_VTISVDKSK_	A0A075B6R2	1.89313	1.89313	7.59347e-05	9.23235e-05	30	A0A075B6R2	IGHV4-4	Immunoglobulin heavy variable 4-4	HV404_HUMAN	1	271.441	3.71441	Dengue	QC	NaN	NaN	NaN	13.9541	0.386396
Dengue / QC	_EALQGVGDM[Oxidation (M)]GR_	A0A096LPE2	0.372421	0.372421	7.69114e-05	9.33713e-05	80	A0A096LPE2	SAA2-SAA4	SAA2-SAA4 readthrough	A0A096LPE2_HUMAN	1	29.4523	1.29452	Dengue	QC	NaN	NaN	NaN	40.7489	0.106315
Dengue / QC	_ALAQC[Carbamidomethyl (C)]APPPAVC[Carbamidomethyl (C)]AELVREPGC[Carbamidomethyl (C)]GC[Carbamidomethyl (C)]C[Carbamidomethyl (C)]LTC[Carbamidomethyl (C)]ALSEGQPC[Carbamidomethyl (C)]GIYTER_	A6XND0;P17936;P17936-2	1.10997	1.10997	7.7092e-05	9.35505e-05	30	A6XND0;P17936;P17936-2	IGFBP3	Insulin-like growth factor-binding protein 3;Insulin-like growth factor-binding protein 3;Isoform 2 of Insulin-like growth factor-binding protein 3	A6XND0_HUMAN;IBP3_HUMAN;IBP3_HUMAN	1	115.841	2.15841	Dengue	QC	NaN	NaN	NaN	23.9435	0.269886
Dengue / QC	_RDPPQYPVVPVHLDR_	P10153	1.95232	1.95232	7.81883e-05	9.47393e-05	24	P10153	RNASE2	Non-secretory ribonuclease	RNAS2_HUMAN	1	286.996	3.86996	Dengue	QC	NaN	NaN	NaN	14.3947	0.35122
Dengue / QC	_TMQALPYSTVGNSNNYLHLSVLRTELRPGETLNVNFLLR_	P01024	1.41114	1.41114	7.82972e-05	9.48309e-05	36	P01024	C3	Complement C3	CO3_HUMAN	1	165.948	2.65948	Dengue	QC	NaN	NaN	NaN	29.1669	0.260476
Dengue / QC	_YNPVVIDFEMQPIHEVLR_	P07357	0.289259	0.289259	7.87455e-05	9.53129e-05	166	P07357	C8A	Complement component C8 alpha chain	CO8A_HUMAN	1	22.2012	1.22201	Dengue	QC	NaN	NaN	NaN	86.4282	0.0924246
Dengue / QC	_LLGIETPLPK_	P05362	1.61359	1.61359	7.89757e-05	9.55306e-05	24	P05362	ICAM1	Intercellular adhesion molecule 1	ICAM1_HUMAN	1	206.012	3.06012	Dengue	QC	NaN	NaN	NaN	6.28354	0.181719
Dengue / QC	_NNQKSEPLIGR_	P02751;P02751-15;P02751-3;P02751-7	0.721268	0.721268	7.92442e-05	9.5835e-05	44	P02751;P02751-15;P02751-3;P02751-7	FN1	Fibronectin;Isoform 15 of Fibronectin;Isoform 3 of Fibronectin;Isoform 7 of Fibronectin	FINC_HUMAN	1	64.863	1.64863	Dengue	QC	NaN	NaN	NaN	29.5556	0.23702
Dengue / QC	_ENLDRDIALMK_	P00734	-0.274399	0.274399	7.92973e-05	9.58787e-05	172	P00734	F2	Prothrombin	THRB_HUMAN	1	-17.3205	0.826795	Dengue	QC	NaN	NaN	NaN	93.0831	0.0614179
Dengue / QC	_EYTDASFTNRK_	P00450	-0.365742	0.365742	7.93553e-05	9.5908e-05	176	P00450	CP	Ceruloplasmin	CERU_HUMAN	1	-22.3931	0.776069	Dengue	QC	NaN	NaN	NaN	56.0212	0.0936985
Dengue / QC	_SVTEQGAELSNEER_	E7EX29;P63104	1.56106	1.56106	7.98678e-05	9.64659e-05	46	E7EX29;P63104	YWHAZ	14-3-3 protein zeta/delta (Fragment);14-3-3 protein zeta/delta	E7EX29_HUMAN;1433Z_HUMAN	1	195.07	2.9507	Dengue	QC	NaN	NaN	NaN	33.1574	0.331596
Dengue / QC	_IVSSAMEPDR_	P08603	0.541388	0.541388	8.04437e-05	9.70584e-05	72	P08603	CFH	Complement factor H	CFAH_HUMAN	1	45.5372	1.45537	Dengue	QC	NaN	NaN	NaN	13.3419	0.139937
Dengue / QC	_MYLGYEYVTAIR_	P02787	-0.333295	0.333295	8.07141e-05	9.73226e-05	176	P02787	TF	Serotransferrin	TRFE_HUMAN	1	-20.6278	0.793722	Dengue	QC	NaN	NaN	NaN	58.4883	0.0869965
Dengue / QC	_ASSAKQR_	P02768	0.72637	0.72637	8.07769e-05	9.73777e-05	22	P02768	ALB	Serum albumin	ALBU_HUMAN	1	65.4471	1.65447	Dengue	QC	NaN	NaN	NaN	14.5699	0.142976
Dengue / QC	_FIVLSNNYLQIR_	A0A087WTE4;A0A087WTF6;A0A087WV75;A0A087WWD4;A0A087WX77;H7BYX6;P13591;P13591-1;P13591-3;P13591-4	1.22428	1.22428	8.08756e-05	9.74722e-05	16	A0A087WTE4;A0A087WTF6;A0A087WV75;A0A087WWD4;A0A087WX77;H7BYX6;P13591;P13591-1;P13591-3;P13591-4	NCAM1	Neural cell adhesion molecule 1;Neural cell adhesion molecule 1;Neural cell adhesion molecule 1;Neural cell adhesion molecule 1;Neural cell adhesion molecule 1;Neural cell adhesion molecule 1;Neural cell adhesion molecule 1;Isoform 2 of Neural cell adhesion molecule 1;Isoform 3 of Neural cell adhesion molecule 1;Isoform 4 of Neural cell adhesion molecule 1	A0A087WTE4_HUMAN;A0A087WTF6_HUMAN;A0A087WV75_HUMAN;A0A087WWD4_HUMAN;A0A087WX77_HUMAN;H7BYX6_HUMAN;NCAM1_HUMAN;NCAM1_HUMAN;NCAM1_HUMAN;NCAM1_HUMAN	1	133.638	2.33638	Dengue	QC	NaN	NaN	NaN	8.68197	0.236637
Dengue / QC	_ASKPGWWLLNTEVGENQR_	A0A0A0MRJ7;P12259	0.397433	0.397433	8.12007e-05	9.77849e-05	108	A0A0A0MRJ7;P12259	F5	Coagulation factor V	A0A0A0MRJ7_HUMAN;FA5_HUMAN	1	31.7162	1.31716	Dengue	QC	NaN	NaN	NaN	65.9865	0.0907899
Dengue / QC	_AEAEEDGDLQC[Carbamidomethyl (C)]LC[Carbamidomethyl (C)]VK_	P10720	0.617596	0.617596	8.15437e-05	9.81148e-05	58	P10720	PF4V1	Platelet factor 4 variant	PF4V_HUMAN	1	53.4316	1.53432	Dengue	QC	NaN	NaN	NaN	32.9138	0.158194
Dengue / QC	_DQVLVSC[Carbamidomethyl (C)]DTGYK_	P48740	0.431518	0.431518	8.18711e-05	9.84879e-05	46	P48740	MASP1	Mannan-binding lectin serine protease 1	MASP1_HUMAN	1	34.8652	1.34865	Dengue	QC	NaN	NaN	NaN	33.0032	0.110069
Dengue / QC	_TC[Carbamidomethyl (C)]RVEC[Carbamidomethyl (C)]SDNLFTQR_	P48740	1.36309	1.36309	8.19832e-05	9.8581e-05	26	P48740	MASP1	Mannan-binding lectin serine protease 1	MASP1_HUMAN	1	157.235	2.57235	Dengue	QC	NaN	NaN	NaN	17.1024	0.385095
Dengue / QC	_QEDAC[Carbamidomethyl (C)]QGDSGGPHVTR_	P00742	0.445476	0.445476	8.21169e-05	9.87209e-05	64	P00742	F10	Coagulation factor X	FA10_HUMAN	1	36.1763	1.36176	Dengue	QC	NaN	NaN	NaN	43.7075	0.129145
Dengue / QC	_IAQYYYTFK_	P05160	0.702234	0.702234	8.21739e-05	9.87685e-05	50	P05160	F13B	Coagulation factor XIII B chain	F13B_HUMAN	1	62.7022	1.62702	Dengue	QC	NaN	NaN	NaN	18.0312	0.134569
Dengue / QC	_TQSSDGKAQMQSPA_	H0YAC1;P03952	0.509432	0.509432	8.34028e-05	0.000100161	80	H0YAC1;P03952	KLKB1	Plasma kallikrein (Fragment);Plasma kallikrein	H0YAC1_HUMAN;KLKB1_HUMAN	1	42.349	1.42349	Dengue	QC	NaN	NaN	NaN	39.0299	0.12542
Dengue / QC	_TKELTSELKENFIR_	P80188;P80188-2;X6R8F3	1.54832	1.54832	8.44095e-05	0.000101311	24	P80188;P80188-2;X6R8F3	LCN2	Neutrophil gelatinase-associated lipocalin;Isoform 2 of Neutrophil gelatinase-associated lipocalin;Neutrophil gelatinase-associated lipocalin	NGAL_HUMAN;NGAL_HUMAN;X6R8F3_HUMAN	1	192.476	2.92476	Dengue	QC	NaN	NaN	NaN	11.8035	0.29021
Dengue / QC	_DALSASVVK_	Q13103	0.890865	0.890865	8.54114e-05	0.000102422	18	Q13103	SPP2	Secreted phosphoprotein 24	SPP24_HUMAN	1	85.4288	1.85429	Dengue	QC	NaN	NaN	NaN	10.9568	0.182481
Dengue / QC	_GFYPSDIAVEWESSGQPENNYNTTPPMLDSDGSFFLYSK_	P01860	1.49524	1.49524	8.57401e-05	0.000102794	26	P01860	IGHG3	Immunoglobulin heavy constant gamma 3	IGHG3_HUMAN	1	181.911	2.81911	Dengue	QC	NaN	NaN	NaN	16.3556	0.347229
Dengue / QC	_AEDTAVYYC[Carbamidomethyl (C)]VR_	A0A0C4DH35	-0.413954	0.413954	8.608e-05	0.000103115	174	A0A0C4DH35	IGHV3-35	Immunoglobulin heavy variable 3-35 (non-functional) (Fragment)	A0A0C4DH35_HUMAN	1	-24.9436	0.750564	Dengue	QC	NaN	NaN	NaN	53.8612	0.106865
Dengue / QC	_ATWSGAVLAGR_	P04217	-0.431604	0.431604	8.62325e-05	0.000103275	172	P04217	A1BG	Alpha-1B-glycoprotein	A1BG_HUMAN	1	-25.8563	0.741437	Dengue	QC	NaN	NaN	NaN	48.4209	0.102857
Dengue / QC	_PKNPANPVQR_	P00738	0.872781	0.872781	8.63913e-05	0.000103444	34	P00738	HP	Haptoglobin	HPT_HUMAN	1	83.1189	1.83119	Dengue	QC	NaN	NaN	NaN	28.091	0.229681
Dengue / QC	_SFVHLEPMSHELPC[Carbamidomethyl (C)]GHTQTVQAHYILNGGTLLGLK_	P01023	0.474566	0.474566	8.69595e-05	0.00010408	150	P01023	A2M	Alpha-2-macroglobulin	A2MG_HUMAN	1	38.95	1.3895	Dengue	QC	NaN	NaN	NaN	142.858	0.112604
Dengue / QC	_FQLFGSPSGQK_	E7ER44;P02788	1.08153	1.08153	8.71202e-05	0.000104251	40	E7ER44;P02788	LTF	Lactotransferrin	E7ER44_HUMAN;TRFL_HUMAN	1	111.628	2.11628	Dengue	QC	NaN	NaN	NaN	33.806	0.254857
Dengue / QC	_MGPTELLIEMEDWKGDK_	P02675	2.1942	2.1942	8.77667e-05	0.00010498	50	P02675	FGB	Fibrinogen beta chain	FIBB_HUMAN	1	357.636	4.57636	Dengue	QC	NaN	NaN	NaN	33.215	0.361735
Dengue / QC	_GHLFLQTDQPIYNPGQR_	P0C0L5	-0.346833	0.346833	8.82799e-05	0.000105531	176	P0C0L5	C4B	Complement C4-B	CO4B_HUMAN	1	-21.3692	0.786308	Dengue	QC	NaN	NaN	NaN	62.0547	0.0869852
Dengue / QC	_ASGYTFTGYYMHWVR_	P23083	0.510745	0.510745	8.83684e-05	0.000105611	54	P23083	IGHV1-2	Immunoglobulin heavy variable 1-2	HV102_HUMAN	1	42.4786	1.42479	Dengue	QC	NaN	NaN	NaN	44.1846	0.21819
Dengue / QC	_WYQMGIVSWGEGC[Carbamidomethyl (C)]DRDGK_	P00734	0.695545	0.695545	8.9503e-05	0.000106855	34	P00734	F2	Prothrombin	THRB_HUMAN	1	61.9496	1.6195	Dengue	QC	NaN	NaN	NaN	6.10937	0.0802329
Dengue / QC	_WITKQQNAQGGFSSTQDTVVALHALSKYGAATFTR_	P01023	0.808209	0.808209	9.01632e-05	0.000107598	30	P01023	A2M	Alpha-2-macroglobulin	A2MG_HUMAN	1	75.1036	1.75104	Dengue	QC	NaN	NaN	NaN	25.0905	0.165218
Dengue / QC	_YVGGQEHFAHLLILRDTK_	P02763	1.0458	1.0458	9.04916e-05	0.000107944	160	P02763	ORM1	Alpha-1-acid glycoprotein 1	A1AG1_HUMAN	1	106.451	2.06451	Dengue	QC	NaN	NaN	NaN	147.943	0.227838
Dengue / QC	_AEDTALYYC[Carbamidomethyl (C)]AK_	P01782	-0.464688	0.464688	9.20845e-05	0.000109706	176	P01782	IGHV3-9	Immunoglobulin heavy variable 3-9	HV309_HUMAN	1	-27.5372	0.724628	Dengue	QC	NaN	NaN	NaN	57.3711	0.113006
Dengue / QC	_HLSLLTTLSNRVC[Carbamidomethyl (C)]SQYAAYGEKK_	P02774;P02774-3	0.475308	0.475308	9.22368e-05	0.000109842	92	P02774;P02774-3	GC	Vitamin D-binding protein;Isoform 3 of Vitamin D-binding protein	VTDB_HUMAN	1	39.0215	1.39022	Dengue	QC	NaN	NaN	NaN	58.6686	0.135414
Dengue / QC	_VPVAVQGEDTVQSLTQGDGVAK_	P01024	-0.802703	0.802703	9.30597e-05	0.000110659	176	P01024	C3	Complement C3	CO3_HUMAN	1	-42.6726	0.573274	Dengue	QC	NaN	NaN	NaN	41.7605	0.16912
Dengue / QC	_LVGGDNLC[Carbamidomethyl (C)]SGR_	O43866	-0.451888	0.451888	9.36943e-05	0.000111344	166	O43866	CD5L	CD5 antigen-like	CD5L_HUMAN	1	-26.8915	0.731085	Dengue	QC	NaN	NaN	NaN	59.9526	0.118701
Dengue / QC	_RGHLFLQTDQPIYNPGQR_	P0C0L5	-0.240662	0.240662	9.4679e-05	0.00011242	176	P0C0L5	C4B	Complement C4-B	CO4B_HUMAN	1	-15.3643	0.846357	Dengue	QC	NaN	NaN	NaN	65.3295	0.0727414
Dengue / QC	_A[Acetyl (Protein N-term)]GLNSLEAVK_	P67936	1.40916	1.40916	9.46608e-05	0.00011242	32	P67936	TPM4	Tropomyosin alpha-4 chain	TPM4_HUMAN	1	165.583	2.65583	Dengue	QC	NaN	NaN	NaN	7.5177	0.127968
Dengue / QC	_LLLQM[Oxidation (M)]DSSATAYGSTVSKR_	P04114	0.708815	0.708815	9.48423e-05	0.000112591	58	P04114	APOB	Apolipoprotein B-100	APOB_HUMAN	1	63.4461	1.63446	Dengue	QC	NaN	NaN	NaN	40.2736	0.183734
Dengue / QC	_MRPWKDPPSDLLLLK_	A0A0A0MRJ7;P12259	0.596427	0.596427	9.50906e-05	0.000112862	36	A0A0A0MRJ7;P12259	F5	Coagulation factor V	A0A0A0MRJ7_HUMAN;FA5_HUMAN	1	51.1968	1.51197	Dengue	QC	NaN	NaN	NaN	21.0488	0.186436
Dengue / QC	_TGESAEFVC[Carbamidomethyl (C)]K_	Q03591	0.560845	0.560845	9.51722e-05	0.000112911	134	Q03591	CFHR1	Complement factor H-related protein 1	FHR1_HUMAN	1	47.5133	1.47513	Dengue	QC	NaN	NaN	NaN	87.4942	0.122734
Dengue / QC	_DGNTLTYYR_	P02748	-0.468019	0.468019	9.56499e-05	0.000113431	166	P02748	C9	Complement component C9	CO9_HUMAN	1	-27.7044	0.722956	Dengue	QC	NaN	NaN	NaN	48.2563	0.10063
Dengue / QC	_LSSVTAADTAVYYC[Carbamidomethyl (C)]AR_	A0A075B6R2	-0.474502	0.474502	9.58861e-05	0.000113663	176	A0A075B6R2	IGHV4-4	Immunoglobulin heavy variable 4-4	HV404_HUMAN	1	-28.0285	0.719715	Dengue	QC	NaN	NaN	NaN	68.3491	0.111545
Dengue / QC	_C[Carbamidomethyl (C)]PEALFQPSFLGM[Oxidation (M)]ESC[Carbamidomethyl (C)]GIHETTFNSIM[Oxidation (M)]K_	P60709	-4.16274	4.16274	9.61505e-05	0.000113929	10	P60709	ACTB	Actin, cytoplasmic 1	ACTB_HUMAN	1	-94.4167	0.055833	Dengue	QC	NaN	NaN	NaN	3.5088	0.551364
Dengue / QC	_M[Oxidation (M)]GPKGEPGDPVNLLR_	O75636	-0.47654	0.47654	9.71438e-05	0.000115011	170	O75636	FCN3	Ficolin-3	FCN3_HUMAN	1	-28.1301	0.718699	Dengue	QC	NaN	NaN	NaN	63.2469	0.111471
Dengue / QC	_SLGPALLLLQK_	P14780	1.04586	1.04586	9.79614e-05	0.000115882	86	P14780	MMP9	Matrix metalloproteinase-9	MMP9_HUMAN	1	106.459	2.06459	Dengue	QC	NaN	NaN	NaN	57.4846	0.24969
Dengue / QC	_KVETNM[Oxidation (M)]AFSPFSIASLLTQVLLGAGENTK_	P05155;P05155-3	-0.503808	0.503808	9.89979e-05	0.000116962	40	P05155;P05155-3	SERPING1	Plasma protease C1 inhibitor;Isoform 3 of Plasma protease C1 inhibitor	IC1_HUMAN	1	-29.4757	0.705243	Dengue	QC	NaN	NaN	NaN	3.11657	0.229483
Dengue / QC	_GGTLGTPQTGSENDALYEYLR_	E9PHK0;P05452	0.814049	0.814049	9.93834e-05	0.000117393	172	E9PHK0;P05452	CLEC3B	Tetranectin	E9PHK0_HUMAN;TETN_HUMAN	1	75.8139	1.75814	Dengue	QC	NaN	NaN	NaN	86.458	0.096123
Dengue / QC	_DYFMPC[Carbamidomethyl (C)]PGRGHGHR_	P02790	1.02548	1.02548	0.000100411	0.000118508	84	P02790	HPX	Hemopexin	HEMO_HUMAN	1	103.564	2.03564	Dengue	QC	NaN	NaN	NaN	68.0985	0.200343
Dengue / QC	_HAYGRKPIWLSQMSC[Carbamidomethyl (C)]SGR_	O43866	0.530716	0.530716	0.000101044	0.000119206	120	O43866	CD5L	CD5 antigen-like	CD5L_HUMAN	1	44.4646	1.44465	Dengue	QC	NaN	NaN	NaN	114.984	0.163308
Dengue / QC	_GDEC[Carbamidomethyl (C)]QLC[Carbamidomethyl (C)]EVENR_	O75882;O75882-2	0.444243	0.444243	0.000101255	0.000119405	96	O75882;O75882-2	ATRN	Attractin;Isoform 2 of Attractin	ATRN_HUMAN	1	36.06	1.3606	Dengue	QC	NaN	NaN	NaN	14.2945	0.118283
Dengue / QC	_AQLVPLPPSTYVEFTVSGTDC[Carbamidomethyl (C)]VAKEATEAAK_	P02765	0.889145	0.889145	0.000102028	0.000120167	150	P02765	AHSG	Alpha-2-HS-glycoprotein	FETUA_HUMAN	1	85.2079	1.85208	Dengue	QC	NaN	NaN	NaN	116.471	0.178249
Dengue / QC	_GFGSLNDEGEGEFWLGNDYLHLLTQR_	P02671	0.333426	0.333426	0.000102256	0.000120411	26	P02671	FGA	Fibrinogen alpha chain	FIBA_HUMAN	1	26.0002	1.26	Dengue	QC	NaN	NaN	NaN	20.2551	0.196772
Dengue / QC	_YDYC[Carbamidomethyl (C)]DILEC[Carbamidomethyl (C)]EEEC[Carbamidomethyl (C)]MHC[Carbamidomethyl (C)]SGENYDGK_	P00747	0.293313	0.293313	0.000102827	0.000121033	174	P00747	PLG	Plasminogen	PLMN_HUMAN	1	22.5451	1.22545	Dengue	QC	NaN	NaN	NaN	84.8936	0.0613738
Dengue / QC	_YVLPNFEVK_	P0C0L5	-0.349984	0.349984	0.00010367	0.000121899	172	P0C0L5	C4B	Complement C4-B	CO4B_HUMAN	1	-21.5407	0.784593	Dengue	QC	NaN	NaN	NaN	53.4623	0.0894166
Dengue / QC	_VFSNGADLSGVTEEAPLKLSK_	P01009	-0.755746	0.755746	0.000103983	0.000122242	176	P01009	SERPINA1	Alpha-1-antitrypsin	A1AT_HUMAN	1	-40.776	0.59224	Dengue	QC	NaN	NaN	NaN	43.2145	0.171429
Dengue / QC	_VGSALFLSHNLK_	P29622	1.00783	1.00783	0.000104461	0.000122779	30	P29622	SERPINA4	Kallistatin	KAIN_HUMAN	1	101.088	2.01088	Dengue	QC	NaN	NaN	NaN	6.38272	0.153553
Dengue / QC	_NMATRPYSIHAHGVQTESSTVTPTLPGETLTYVWK_	P00450	-0.470805	0.470805	0.0001056	0.000124015	162	P00450	CP	Ceruloplasmin	CERU_HUMAN	1	-27.8438	0.721562	Dengue	QC	NaN	NaN	NaN	59.6377	0.0999745
Dengue / QC	_NTFAEVTGLSPGVTYYFK_	P02751;P02751-15;P02751-3;P02751-7	0.389663	0.389663	0.000107362	0.000125902	154	P02751;P02751-15;P02751-3;P02751-7	FN1	Fibronectin;Isoform 15 of Fibronectin;Isoform 3 of Fibronectin;Isoform 7 of Fibronectin	FINC_HUMAN	1	31.0088	1.31009	Dengue	QC	NaN	NaN	NaN	98.9094	0.101033
Dengue / QC	_RLYGSEAFATDFQDSAAAKK_	P01011	-0.303227	0.303227	0.000107625	0.000126184	168	P01011	SERPINA3	Alpha-1-antichymotrypsin	AACT_HUMAN	1	-18.9562	0.810438	Dengue	QC	NaN	NaN	NaN	136.827	0.0771244
Dengue / QC	_VSSFLPWIR_	P08311	0.580461	0.580461	0.000108359	0.000126992	60	P08311	CTSG	Cathepsin G	CATG_HUMAN	1	49.5327	1.49533	Dengue	QC	NaN	NaN	NaN	38.2859	0.251497
Dengue / QC	_LPYSVVR_	P01024	-0.256279	0.256279	0.000109948	0.000128702	172	P01024	C3	Complement C3	CO3_HUMAN	1	-16.2756	0.837244	Dengue	QC	NaN	NaN	NaN	128.258	0.0613254
Dengue / QC	_PSLSHLLSQYYGAGVARDPGFR_	Q96PD5	0.857404	0.857404	0.000110163	0.000128921	36	Q96PD5	PGLYRP2	N-acetylmuramoyl-L-alanine amidase	PGRP2_HUMAN	1	81.1775	1.81178	Dengue	QC	NaN	NaN	NaN	28.6281	0.16743
Dengue / QC	_TYIYDHGFPYTDPVGVLYEDGDDTVATR_	P04180	0.462786	0.462786	0.00011031	0.000129066	158	P04180	LCAT	Phosphatidylcholine-sterol acyltransferase	LCAT_HUMAN	1	37.8201	1.3782	Dengue	QC	NaN	NaN	NaN	85.8217	0.092533
Dengue / QC	_VSM[Oxidation (M)]MQTK_	P05546	0.850027	0.850027	0.000110967	0.000129781	28	P05546	SERPIND1	Heparin cofactor 2	HEP2_HUMAN	1	80.2534	1.80253	Dengue	QC	NaN	NaN	NaN	20.0795	0.1728
Dengue / QC	_VTTSQDMLSIM[Oxidation (M)]EK_	P05155;P05155-3	1.01379	1.01379	0.000111501	0.000130299	20	P05155;P05155-3	SERPING1	Plasma protease C1 inhibitor;Isoform 3 of Plasma protease C1 inhibitor	IC1_HUMAN	1	101.921	2.01921	Dengue	QC	NaN	NaN	NaN	11.922	0.163331
Dengue / QC	_DISEVVTPR_	B4E1Z4	-0.264793	0.264793	0.000112546	0.000131493	176	B4E1Z4	NaN	cDNA FLJ55673, highly similar to Complement factor B (EC 3.4.21.47)	B4E1Z4_HUMAN	1	-16.7682	0.832318	Dengue	QC	NaN	NaN	NaN	50.0788	0.0694962
Dengue / QC	_AKLGNFPWQAFTSIHGR_	Q9NZP8	-0.432244	0.432244	0.00011292	0.000131875	158	Q9NZP8	C1RL	Complement C1r subcomponent-like protein	C1RL_HUMAN	1	-25.8892	0.741108	Dengue	QC	NaN	NaN	NaN	37.6606	0.100836
Dengue / QC	_IGEKWDR_	P02751;P02751-15;P02751-3;P02751-7	0.88491	0.88491	0.000116791	0.000136015	68	P02751;P02751-15;P02751-3;P02751-7	FN1	Fibronectin;Isoform 15 of Fibronectin;Isoform 3 of Fibronectin;Isoform 7 of Fibronectin	FINC_HUMAN	1	84.6649	1.84665	Dengue	QC	NaN	NaN	NaN	25.4042	0.19971
Dengue / QC	_GSWVNKFPVEMTHNHNFR_	P05546	0.904839	0.904839	0.000116921	0.0001361	68	P05546	SERPIND1	Heparin cofactor 2	HEP2_HUMAN	1	87.2335	1.87233	Dengue	QC	NaN	NaN	NaN	11.4628	0.137451
Dengue / QC	_RPVKLLSGGNTLHLVSTTK_	P04114	0.593684	0.593684	0.000117424	0.000136582	94	P04114	APOB	Apolipoprotein B-100	APOB_HUMAN	1	50.9095	1.5091	Dengue	QC	NaN	NaN	NaN	76.8366	0.169811
Dengue / QC	_VVQGKEPAHLMSLFGGKPMIIYK_	P06396	0.277049	0.277049	0.000118221	0.000137389	108	P06396	GSN	Gelsolin	GELS_HUMAN	1	21.1714	1.21171	Dengue	QC	NaN	NaN	NaN	56.1611	0.0891659
Dengue / QC	_AIPDLTAPVAAVQAAVSNLVR_	P18206;P18206-2	0.744396	0.744396	0.000118811	0.000138046	76	P18206;P18206-2	VCL	Vinculin;Isoform 1 of Vinculin	VINC_HUMAN	1	67.5273	1.67527	Dengue	QC	NaN	NaN	NaN	70.8761	0.183956
Dengue / QC	_STATISGLKPGVDYTITVYAVTGR_	P02751;P02751-15;P02751-3;P02751-7	0.42778	0.42778	0.000119134	0.000138365	154	P02751;P02751-15;P02751-3;P02751-7	FN1	Fibronectin;Isoform 15 of Fibronectin;Isoform 3 of Fibronectin;Isoform 7 of Fibronectin	FINC_HUMAN	1	34.5162	1.34516	Dengue	QC	NaN	NaN	NaN	112.934	0.108609
Dengue / QC	_AVSNEIVRFPTDQLTPDQER_	P05164;P05164-2;P05164-3	0.645816	0.645816	0.000123438	0.000143071	54	P05164;P05164-2;P05164-3	MPO	Myeloperoxidase;Isoform H14 of Myeloperoxidase;Isoform H7 of Myeloperoxidase	PERM_HUMAN	1	56.4624	1.56462	Dengue	QC	NaN	NaN	NaN	29.8493	0.175752
Dengue / QC	_DVRDYFMPC[Carbamidomethyl (C)]PGRGHGHR_	P02790	0.898927	0.898927	0.000124675	0.000144328	148	P02790	HPX	Hemopexin	HEMO_HUMAN	1	86.4679	1.86468	Dengue	QC	NaN	NaN	NaN	126.263	0.178334
Dengue / QC	_LQEAAELEAVELPVPIR_	P02730	-0.0616621	0.0616621	0.00012497	0.000144641	10	P02730	SLC4A1	Band 3 anion transport protein	B3AT_HUMAN	1	-4.18404	0.95816	Dengue	QC	NaN	NaN	NaN	4.64115	0.0840559
Dengue / QC	_EQLSLLDRFTEDAKR_	P01011	-0.553184	0.553184	0.000127127	0.000146868	132	P01011	SERPINA3	Alpha-1-antichymotrypsin	AACT_HUMAN	1	-31.8485	0.681515	Dengue	QC	NaN	NaN	NaN	40.5703	0.140981
Dengue / QC	_IAQWQSFQLEGGLKQFSFPLSSEPFQGSYKVVVQK_	P01023	0.426137	0.426137	0.000128873	0.000148613	132	P01023	A2M	Alpha-2-macroglobulin	A2MG_HUMAN	1	34.3631	1.34363	Dengue	QC	NaN	NaN	NaN	87.4721	0.119241
Dengue / QC	_FGLLDEDGKK_	P0C0L5	-0.274631	0.274631	0.000129499	0.000149214	174	P0C0L5	C4B	Complement C4-B	CO4B_HUMAN	1	-17.3338	0.826662	Dengue	QC	NaN	NaN	NaN	110.479	0.0687963
Dengue / QC	_IPGTC[Carbamidomethyl (C)]C[Carbamidomethyl (C)]DTC[Carbamidomethyl (C)]EEPEC[Carbamidomethyl (C)]NDITAR_	P04275	0.832816	0.832816	0.000129773	0.000149469	44	P04275	VWF	von Willebrand factor	VWF_HUMAN	1	78.1158	1.78116	Dengue	QC	NaN	NaN	NaN	33.4823	0.156842
Dengue / QC	_HLDSVLQQLQTEVYR_	F8VYK9;P24592	1.20891	1.20891	0.000130648	0.000150385	56	F8VYK9;P24592	IGFBP6	Insulin-like growth factor-binding protein 6	F8VYK9_HUMAN;IBP6_HUMAN	1	131.163	2.31163	Dengue	QC	NaN	NaN	NaN	43.0864	0.239643
Dengue / QC	_SDTSLTWNSVK_	E7ER44;P02788	1.10445	1.10445	0.000130869	0.000150609	44	E7ER44;P02788	LTF	Lactotransferrin	E7ER44_HUMAN;TRFL_HUMAN	1	115.017	2.15017	Dengue	QC	NaN	NaN	NaN	33.2447	0.259166
Dengue / QC	_AAQVTIQSSGTFSSK_	P01023	-0.780081	0.780081	0.000131045	0.000150781	166	P01023	A2M	Alpha-2-macroglobulin	A2MG_HUMAN	1	-41.7666	0.582334	Dengue	QC	NaN	NaN	NaN	44.4632	0.18817
Dengue / QC	_LLIYAASSLQSGVPSR_	A0A0C4DH72	-0.683403	0.683403	0.000131906	0.00015168	172	A0A0C4DH72	IGKV1-6	Immunoglobulin kappa variable 1-6	KV106_HUMAN	1	-37.7305	0.622695	Dengue	QC	NaN	NaN	NaN	75.6018	0.122614
Dengue / QC	_YTKKVPQVSTPTLVEVSR_	P02768	1.43485	1.43485	0.000132406	0.000152224	176	P02768	ALB	Serum albumin	ALBU_HUMAN	1	170.353	2.70353	Dengue	QC	NaN	NaN	NaN	164.108	0.30139
Dengue / QC	_LESGVPSR_	A0A0G2JRQ6	0.563272	0.563272	0.000132829	0.000152618	156	A0A0G2JRQ6	NaN	Uncharacterized protein (Fragment)	A0A0G2JRQ6_HUMAN	1	47.7616	1.47762	Dengue	QC	NaN	NaN	NaN	146.564	0.132169
Dengue / QC	_GMYGIENEVFLSLPC[Carbamidomethyl (C)]ILNAR_	P07195	0.927165	0.927165	0.000132886	0.000152652	26	P07195	LDHB	L-lactate dehydrogenase B chain	LDHB_HUMAN	1	90.1536	1.90154	Dengue	QC	NaN	NaN	NaN	15.3588	0.261817
Dengue / QC	_TMSGLEC[Carbamidomethyl (C)]QAWDSQSPHAHGYIPSK_	P00747	0.264716	0.264716	0.000134454	0.000154298	60	P00747	PLG	Plasminogen	PLMN_HUMAN	1	20.14	1.2014	Dengue	QC	NaN	NaN	NaN	26.9634	0.0876657
Dengue / QC	_HQPQEFPTYVEPTNDEIC[Carbamidomethyl (C)]EAFRKDPK_	P02774;P02774-3	0.370574	0.370574	0.000135562	0.000155476	176	P02774;P02774-3	GC	Vitamin D-binding protein;Isoform 3 of Vitamin D-binding protein	VTDB_HUMAN	1	29.2867	1.29287	Dengue	QC	NaN	NaN	NaN	152.873	0.10514
Dengue / QC	_SGQSEDRQPVPGQQMTLK_	P01024	-0.367372	0.367372	0.000136173	0.000156081	176	P01024	C3	Complement C3	CO3_HUMAN	1	-22.4807	0.775193	Dengue	QC	NaN	NaN	NaN	43.091	0.100652
Dengue / QC	_VEGTAFVIFGIQDGEQR_	P01024	0.483315	0.483315	0.000138366	0.000158403	116	P01024	C3	Complement C3	CO3_HUMAN	1	39.7952	1.39795	Dengue	QC	NaN	NaN	NaN	54.4324	0.118245
Dengue / QC	_HSTIFENLANKADR_	P02787	-0.366959	0.366959	0.000138539	0.00015857	174	P02787	TF	Serotransferrin	TRFE_HUMAN	1	-22.4585	0.775415	Dengue	QC	NaN	NaN	NaN	52.1022	0.0947407
Dengue / QC	_NVHWYQQK_	A0A075B6K5	0.211096	0.211096	0.000139104	0.000159152	70	A0A075B6K5	IGLV3-9	Immunoglobulin lambda variable 3-9	LV39_HUMAN	1	15.7567	1.15757	Dengue	QC	NaN	NaN	NaN	21.7981	0.133349
Dengue / QC	_QITVNDLPVGR_	P32119	0.336305	0.336305	0.000141063	0.000161069	118	P32119	PRDX2	Peroxiredoxin-2	PRDX2_HUMAN	1	26.2519	1.26252	Dengue	QC	NaN	NaN	NaN	112.875	0.0827069
Dengue / QC	_TEQAAVAR_	P00748	0.477433	0.477433	0.000143364	0.000163368	160	P00748	F12	Coagulation factor XII	FA12_HUMAN	1	39.2265	1.39226	Dengue	QC	NaN	NaN	NaN	59.7641	0.113068
Dengue / QC	_TKGQPREPQVYTLPPSR_	P01860	0.571321	0.571321	0.000144874	0.000164957	174	P01860	IGHG3	Immunoglobulin heavy constant gamma 3	IGHG3_HUMAN	1	48.5883	1.48588	Dengue	QC	NaN	NaN	NaN	142.735	0.158485
Dengue / QC	_LVLSSEK_	P01024	-0.352558	0.352558	0.000146175	0.000166238	176	P01024	C3	Complement C3	CO3_HUMAN	1	-21.6806	0.783194	Dengue	QC	NaN	NaN	NaN	48.3932	0.0945283
Dengue / QC	_QEPERNEC[Carbamidomethyl (C)]FLQHK_	P02768	-0.29026	0.29026	0.000146265	0.000166281	176	P02768	ALB	Serum albumin	ALBU_HUMAN	1	-18.2245	0.817755	Dengue	QC	NaN	NaN	NaN	61.5221	0.101888
Dengue / QC	_LFEQVM[Oxidation (M)]R_	P05164;P05164-2;P05164-3	1.9918	1.9918	0.000147173	0.000167239	18	P05164;P05164-2;P05164-3	MPO	Myeloperoxidase;Isoform H14 of Myeloperoxidase;Isoform H7 of Myeloperoxidase	PERM_HUMAN	1	297.733	3.97733	Dengue	QC	NaN	NaN	NaN	12.5717	0.34007
Dengue / QC	_MDAHPPR_	P06396	0.559791	0.559791	0.00014761	0.000167669	114	P06396	GSN	Gelsolin	GELS_HUMAN	1	47.4056	1.47406	Dengue	QC	NaN	NaN	NaN	78.3483	0.14769
Dengue / QC	_SHKSYSC[Carbamidomethyl (C)]QVTHEGSTVEK_	P0DOY3	0.903761	0.903761	0.00014805	0.000168113	158	P0DOY3	IGLC3	Immunoglobulin lambda constant 3	IGLC3_HUMAN	1	87.0937	1.87094	Dengue	QC	NaN	NaN	NaN	152.746	0.250432
Dengue / QC	_KEDSC[Carbamidomethyl (C)]QLGYSAGPC[Carbamidomethyl (C)]MGMTSR_	P02760	-0.37525	0.37525	0.00014806	0.000168113	174	P02760	AMBP	Protein AMBP	AMBP_HUMAN	1	-22.9028	0.770972	Dengue	QC	NaN	NaN	NaN	43.134	0.100865
Dengue / QC	_DVC[Carbamidomethyl (C)]KNYAEAKDVFLGM[Oxidation (M)]FLYEYAR_	P02768	0.814247	0.814247	0.000149401	0.000169568	120	P02768	ALB	Serum albumin	ALBU_HUMAN	1	75.838	1.75838	Dengue	QC	NaN	NaN	NaN	95.973	0.285662
Dengue / QC	_GVASLFAGR_	A0A0C4DFP6;Q9NQ79;Q9NQ79-2	0.402557	0.402557	0.000150024	0.00017024	88	A0A0C4DFP6;Q9NQ79;Q9NQ79-2	CRTAC1	Cartilage acidic protein 1;Cartilage acidic protein 1;Isoform 2 of Cartilage acidic protein 1	A0A0C4DFP6_HUMAN;CRAC1_HUMAN;CRAC1_HUMAN	1	32.1849	1.32185	Dengue	QC	NaN	NaN	NaN	33.8597	0.133317
Dengue / QC	_SSGLPNIPVQTISR_	G3V0E5;P02786	-0.638209	0.638209	0.000150303	0.000170524	148	G3V0E5;P02786	TFRC	Transferrin receptor (P90, CD71), isoform CRA_c;Transferrin receptor protein 1	G3V0E5_HUMAN;TFR1_HUMAN	1	-35.749	0.64251	Dengue	QC	NaN	NaN	NaN	41.662	0.148516
Dengue / QC	_LEKEVGTPHGIILDSVDAAFIC[Carbamidomethyl (C)]PGSSR_	P02790	0.952014	0.952014	0.000150793	0.000171	156	P02790	HPX	Hemopexin	HEMO_HUMAN	1	93.4572	1.93457	Dengue	QC	NaN	NaN	NaN	89.4446	0.128201
Dengue / QC	_FGFC[Carbamidomethyl (C)]PMAAHEEIC[Carbamidomethyl (C)]TTNEGVMYR_	P02751;P02751-15;P02751-3;P02751-7	0.448446	0.448446	0.000151747	0.000171955	152	P02751;P02751-15;P02751-3;P02751-7	FN1	Fibronectin;Isoform 15 of Fibronectin;Isoform 3 of Fibronectin;Isoform 7 of Fibronectin	FINC_HUMAN	1	36.4569	1.36457	Dengue	QC	NaN	NaN	NaN	133.722	0.08584
Dengue / QC	_TMGYQDFADVVC[Carbamidomethyl (C)]YTQK_	E7ETH0;G3XAM2;P05156	0.312728	0.312728	0.00015223	0.000172366	162	E7ETH0;G3XAM2;P05156	CFI	Complement factor I	E7ETH0_HUMAN;G3XAM2_HUMAN;CFAI_HUMAN	1	24.2054	1.24205	Dengue	QC	NaN	NaN	NaN	81.3175	0.0767538
Dengue / QC	_STSTAY[Sulfation (Y)]MELSSLR_	P01742	0.306513	0.306513	0.000152316	0.000172429	78	P01742	IGHV1-69	Immunoglobulin heavy variable 1-69	HV169_HUMAN	1	23.6715	1.23671	Dengue	QC	NaN	NaN	NaN	41.9076	0.278987
Dengue / QC	_STGGAPTFNVTVTK_	P07737	0.376671	0.376671	0.000153255	0.000173319	100	P07737	PFN1	Profilin-1	PROF1_HUMAN	1	29.8343	1.29834	Dengue	QC	NaN	NaN	NaN	94.2686	0.0940397
Dengue / QC	_VAQELEEK_	O14791;O14791-2	0.364288	0.364288	0.00015332	0.000173358	90	O14791;O14791-2	APOL1	Apolipoprotein L1;Isoform 2 of Apolipoprotein L1	APOL1_HUMAN	1	28.7246	1.28725	Dengue	QC	NaN	NaN	NaN	63.2727	0.10254
Dengue / QC	_TVAAPSVFIFPPSDEQLKSGTASVVC[Carbamidomethyl (C)]LLNNFYPREAK_	P01834	1.2476	1.2476	0.000156886	0.000177073	96	P01834	IGKC	Immunoglobulin kappa constant	IGKC_HUMAN	1	137.446	2.37446	Dengue	QC	NaN	NaN	NaN	83.7514	0.248364
Dengue / QC	_GIETGSEDLEILPNGLAFISSGLKYPGIK_	P27169	0.729242	0.729242	0.000158893	0.000179066	156	P27169	PON1	Serum paraoxonase/arylesterase 1	PON1_HUMAN	1	65.7768	1.65777	Dengue	QC	NaN	NaN	NaN	78.0977	0.124268
Dengue / QC	_LRYHGDPMPC[Carbamidomethyl (C)]PK_	P09871	0.455653	0.455653	0.000160918	0.000181084	80	P09871	C1S	Complement C1s subcomponent	C1S_HUMAN	1	37.1403	1.3714	Dengue	QC	NaN	NaN	NaN	46.7305	0.133445
Dengue / QC	_TLSLPELEQQQEQQQEQQQEQVQMLAPLES_	P06727	0.366962	0.366962	0.00016174	0.000181974	124	P06727	APOA4	Apolipoprotein A-IV	APOA4_HUMAN	1	28.9634	1.28963	Dengue	QC	NaN	NaN	NaN	107.696	0.095722
Dengue / QC	_VFAIPPSFASIFLTK_	P01871	-0.496554	0.496554	0.000164091	0.000184509	176	P01871	IGHM	Immunoglobulin heavy constant mu	IGHM_HUMAN	1	-29.1202	0.708798	Dengue	QC	NaN	NaN	NaN	76.0356	0.136133
Dengue / QC	_LGDDLLQC[Carbamidomethyl (C)]HPAVK_	E7END6;P04070;P04070-2	0.730005	0.730005	0.000164501	0.000184897	26	E7END6;P04070;P04070-2	PROC	Vitamin K-dependent protein C;Vitamin K-dependent protein C;Isoform 2 of Vitamin K-dependent protein C	E7END6_HUMAN;PROC_HUMAN;PROC_HUMAN	1	65.8645	1.65864	Dengue	QC	NaN	NaN	NaN	6.48966	0.0821137
Dengue / QC	_QGALELIK_	P01024	-0.454194	0.454194	0.000164774	0.000185131	176	P01024	C3	Complement C3	CO3_HUMAN	1	-27.0082	0.729918	Dengue	QC	NaN	NaN	NaN	41.9776	0.11441
Dengue / QC	_ASQSVSSSYLAWYQQKPGQAPRLLIYGASSR_	P01619	1.20484	1.20484	0.000165418	0.00018567	22	P01619	IGKV3-20	Immunoglobulin kappa variable 3-20	KV320_HUMAN	1	130.512	2.30512	Dengue	QC	NaN	NaN	NaN	10.427	0.15574
Dengue / QC	_ITC[Carbamidomethyl (C)]SGDVLAKK_	P01718	1.18347	1.18347	0.000165404	0.00018567	22	P01718	IGLV3-27	Immunoglobulin lambda variable 3-27	LV327_HUMAN	1	127.123	2.27123	Dengue	QC	NaN	NaN	NaN	16.4913	0.389186
Dengue / QC	_LVEENALAPDFSK_	Q13201	0.392073	0.392073	0.00016585	0.000186119	68	Q13201	MMRN1	Multimerin-1	MMRN1_HUMAN	1	31.2277	1.31228	Dengue	QC	NaN	NaN	NaN	59.2017	0.0986138
Dengue / QC	_LLEPHC[Carbamidomethyl (C)]FPLSLVPTEFC[Carbamidomethyl (C)]PSPPALK_	P10643	0.393448	0.393448	0.00016663	0.000186957	118	P10643	C7	Complement component C7	CO7_HUMAN	1	31.3529	1.31353	Dengue	QC	NaN	NaN	NaN	64.3355	0.12925
Dengue / QC	_ETYGEM[Oxidation (M)]ADC[Carbamidomethyl (C)]C[Carbamidomethyl (C)]AK_	P02768	-0.947005	0.947005	0.000167754	0.000188181	174	P02768	ALB	Serum albumin	ALBU_HUMAN	1	-48.1292	0.518708	Dengue	QC	NaN	NaN	NaN	43.4357	0.193418
Dengue / QC	_TERELLESYIDGR_	P00734	0.527957	0.527957	0.000168171	0.000188574	32	P00734	F2	Prothrombin	THRB_HUMAN	1	44.1886	1.44189	Dengue	QC	NaN	NaN	NaN	27.7649	0.128077
Dengue / QC	_RSVAVYGQYGGQPC[Carbamidomethyl (C)]VGNAFETQSC[Carbamidomethyl (C)]EPTR_	P10643	0.438075	0.438075	0.000169144	0.000189516	88	P10643	C7	Complement component C7	CO7_HUMAN	1	35.4795	1.3548	Dengue	QC	NaN	NaN	NaN	81.3648	0.131836
Dengue / QC	_TAAISGYSFK_	P03951	0.36939	0.36939	0.000169926	0.000190317	76	P03951	F11	Coagulation factor XI	FA11_HUMAN	1	29.1807	1.29181	Dengue	QC	NaN	NaN	NaN	70.1237	0.10521
Dengue / QC	_GPSVFPLAPSSK_	P01857	-0.397439	0.397439	0.000170195	0.000190544	176	P01857	IGHG1	Immunoglobulin heavy constant gamma 1	IGHG1_HUMAN	1	-24.0795	0.759205	Dengue	QC	NaN	NaN	NaN	53.1227	0.110496
Dengue / QC	_TIYTPGSTVLYRIFTVNHKLLPVGR_	P01024	0.536614	0.536614	0.000170792	0.000191061	164	P01024	C3	Complement C3	CO3_HUMAN	1	45.0564	1.45056	Dengue	QC	NaN	NaN	NaN	95.626	0.115955
Dengue / QC	_ETLLQDFR_	P02760	-0.398111	0.398111	0.000171	0.000191218	176	P02760	AMBP	Protein AMBP	AMBP_HUMAN	1	-24.1149	0.758851	Dengue	QC	NaN	NaN	NaN	114.979	0.0953674
Dengue / QC	_DLHLSDVFLK_	P13671	0.579947	0.579947	0.000171146	0.000191344	24	P13671	C6	Complement component C6	CO6_HUMAN	1	49.4794	1.49479	Dengue	QC	NaN	NaN	NaN	14.4344	0.131797
Dengue / QC	_MGNFPWQVFTNIHGR_	B4DPQ0	-0.292828	0.292828	0.00017178	0.000191865	176	B4DPQ0	C1R	Complement C1r subcomponent	B4DPQ0_HUMAN	1	-18.37	0.8163	Dengue	QC	NaN	NaN	NaN	62.7339	0.0830405
Dengue / QC	_GTYIPVPIVSELQSGK_	P00488	1.12781	1.12781	0.000172338	0.000192374	62	P00488	F13A1	Coagulation factor XIII A chain	F13A_HUMAN	1	118.526	2.18526	Dengue	QC	NaN	NaN	NaN	34.8771	0.353165
Dengue / QC	_LAEYHAK_	P02647	0.743493	0.743493	0.000172941	0.000192972	156	P02647	APOA1	Apolipoprotein A-I	APOA1_HUMAN	1	67.4225	1.67422	Dengue	QC	NaN	NaN	NaN	102.689	0.167145
Dengue / QC	_GLGEISAASEFK_	A0A087WTE4;A0A087WTF6;A0A087WV75;A0A087WWD4;A0A087WX77;H7BYX6;P13591;P13591-1;P13591-3;P13591-4	0.759889	0.759889	0.000173538	0.000193486	30	A0A087WTE4;A0A087WTF6;A0A087WV75;A0A087WWD4;A0A087WX77;H7BYX6;P13591;P13591-1;P13591-3;P13591-4	NCAM1	Neural cell adhesion molecule 1;Neural cell adhesion molecule 1;Neural cell adhesion molecule 1;Neural cell adhesion molecule 1;Neural cell adhesion molecule 1;Neural cell adhesion molecule 1;Neural cell adhesion molecule 1;Isoform 2 of Neural cell adhesion molecule 1;Isoform 3 of Neural cell adhesion molecule 1;Isoform 4 of Neural cell adhesion molecule 1	A0A087WTE4_HUMAN;A0A087WTF6_HUMAN;A0A087WV75_HUMAN;A0A087WWD4_HUMAN;A0A087WX77_HUMAN;H7BYX6_HUMAN;NCAM1_HUMAN;NCAM1_HUMAN;NCAM1_HUMAN;NCAM1_HUMAN	1	69.3361	1.69336	Dengue	QC	NaN	NaN	NaN	10.6951	0.203105
Dengue / QC	_VLNYVDWIKK_	B4DPQ0	-0.30283	0.30283	0.000173986	0.000193802	156	B4DPQ0	C1R	Complement C1r subcomponent	B4DPQ0_HUMAN	1	-18.9339	0.810661	Dengue	QC	NaN	NaN	NaN	45.6687	0.0950261
Dengue / QC	_AAPGQEPPEHMAELQR_	O00391	0.516457	0.516457	0.000173902	0.000193802	64	O00391	QSOX1	Sulfhydryl oxidase 1	QSOX1_HUMAN	1	43.0438	1.43044	Dengue	QC	NaN	NaN	NaN	45.1999	0.135403
Dengue / QC	_TTIEKPVWLGFLGPIIK_	P00450	-0.604544	0.604544	0.000176024	0.000195758	156	P00450	CP	Ceruloplasmin	CERU_HUMAN	1	-34.2321	0.657679	Dengue	QC	NaN	NaN	NaN	42.5711	0.176426
Dengue / QC	_YKAAFTEC[Carbamidomethyl (C)]C[Carbamidomethyl (C)]QAADKAAC[Carbamidomethyl (C)]LLPK_	P02768	0.452715	0.452715	0.000176496	0.00019613	176	P02768	ALB	Serum albumin	ALBU_HUMAN	1	36.8614	1.36861	Dengue	QC	NaN	NaN	NaN	160.138	0.108939
Dengue / QC	_QSGSEC[Carbamidomethyl (C)]IC[Carbamidomethyl (C)]MSPEEDC[Carbamidomethyl (C)]SHHSEDLC[Carbamidomethyl (C)]VFDTDSNDYFTSPAC[Carbamidomethyl (C)]K_	P13671	0.40551	0.40551	0.000176793	0.000196383	122	P13671	C6	Complement component C6	CO6_HUMAN	1	32.4557	1.32456	Dengue	QC	NaN	NaN	NaN	46.2857	0.0898697
Dengue / QC	_C[Carbamidomethyl (C)]NM[Oxidation (M)]GYEYSER_	P08603	0.626311	0.626311	0.000179571	0.000198939	52	P08603	CFH	Complement factor H	CFAH_HUMAN	1	54.3613	1.54361	Dengue	QC	NaN	NaN	NaN	17.4417	0.192935
Dengue / QC	_GDVAFVK_	P02787	-0.342891	0.342891	0.000180433	0.000199802	176	P02787	TF	Serotransferrin	TRFE_HUMAN	1	-21.154	0.78846	Dengue	QC	NaN	NaN	NaN	63.6043	0.0891252
Dengue / QC	_AVGYLITGYQR_	P20742	2.00596	2.00596	0.000180873	0.000200211	68	P20742	PZP	Pregnancy zone protein	PZP_HUMAN	1	301.655	4.01655	Dengue	QC	NaN	NaN	NaN	41.2848	0.516913
Dengue / QC	_LGQYASPTAKR_	P0C0L5	0.95566	0.95566	0.000182068	0.000201338	174	P0C0L5	C4B	Complement C4-B	CO4B_HUMAN	1	93.9467	1.93947	Dengue	QC	NaN	NaN	NaN	156.337	0.183396
Dengue / QC	_AITPPHPASQANIIFDITEGNLR_	P23142	0.472887	0.472887	0.000183111	0.000202412	152	P23142	FBLN1	Fibulin-1	FBLN1_HUMAN	1	38.7884	1.38788	Dengue	QC	NaN	NaN	NaN	107.464	0.103402
Dengue / QC	_LSC[Carbamidomethyl (C)]AASGFTFDDYAM[Oxidation (M)]HWVR_	P01782	0.547861	0.547861	0.000183939	0.000203209	98	P01782	IGHV3-9	Immunoglobulin heavy variable 3-9	HV309_HUMAN	1	46.1917	1.46192	Dengue	QC	NaN	NaN	NaN	78.778	0.14192
Dengue / QC	_AKWEMPFDPQDTHQSR_	P01011	-0.318399	0.318399	0.000187716	0.000207048	170	P01011	SERPINA3	Alpha-1-antichymotrypsin	AACT_HUMAN	1	-19.8041	0.801959	Dengue	QC	NaN	NaN	NaN	68.6523	0.0850854
Dengue / QC	_LLVVYPWTQRFFESFGDLSTPDAVMGNPK_	P68871	1.68292	1.68292	0.0001878	0.000207072	44	P68871	HBB	Hemoglobin subunit beta	HBB_HUMAN	1	221.077	3.21077	Dengue	QC	NaN	NaN	NaN	34.7291	0.435185
Dengue / QC	_SLIYAASSLQSGVPSK_	P04430	-0.564488	0.564488	0.000188197	0.000207462	166	P04430	IGKV1-16	Immunoglobulin kappa variable 1-16	KV116_HUMAN	1	-32.3805	0.676195	Dengue	QC	NaN	NaN	NaN	47.813	0.146446
Dengue / QC	_QVGSGVTTDQVQAEAKESGPTTYK_	P01871	-0.417387	0.417387	0.000188227	0.000207462	154	P01871	IGHM	Immunoglobulin heavy constant mu	IGHM_HUMAN	1	-25.122	0.74878	Dengue	QC	NaN	NaN	NaN	81.9322	0.116997
Dengue / QC	_FDTISEK_	P01008	1.43539	1.43539	0.000188972	0.000208162	18	P01008	SERPINC1	Antithrombin-III	ANT3_HUMAN	1	170.455	2.70455	Dengue	QC	NaN	NaN	NaN	11.4191	0.255012
[truncated: 16,821 more rows]
