# Supplementary material for: Re-mining serum proteomics data reveals extensive post-translational modifications upon Zika and dengue infection
Source: Royal Society of Chemistry journal article supplement (doi:10.1039/d2mo00258b), 2023-02-15
Supplement: d2mo00258b9.xlsx [file d2mo00258b9.xlsx]

## Sheet: 18_11_06_144_samples_final_DDA_
Comparison (group1/group2)	Group	ProteinGroups	AVG Log2 Ratio	Absolute AVG Log2 Ratio	Pvalue	Qvalue	# of Ratios	UniProtIds	Genes	ProteinDescriptions	ProteinNames	# Unique Total Peptides	% Change	Ratio	Condition Numerator	Condition Denominator	GO Cellular Component	GO Molecular Function	GO Biological Process
Dengue / QC	P80108	P80108	0.566679	0.566679	7.40924e-25	5.08767e-23	176	P80108	GPLD1	Phosphatidylinositol-glycan-specific phospholipase D	PHLD_HUMAN	25	48.111	1.48111	Dengue	QC	NaN	NaN	NaN
Dengue / QC	P11226	P11226	1.70982	1.70982	1.06629e-24	6.27586e-23	76	P11226	MBL2	Mannose-binding protein C	MBL2_HUMAN	6	227.12	3.2712	Dengue	QC	NaN	NaN	NaN
Dengue / QC	Q5TFM2	Q5TFM2	1.4009	1.4009	5.25831e-22	2.16642e-20	70	Q5TFM2	CFH	Complement factor H	Q5TFM2_HUMAN	3	164.067	2.64067	Dengue	QC	NaN	NaN	NaN
Dengue / QC	A0A0C4DGB6	A0A0C4DGB6	1.36911	1.36911	3.59509e-16	7.05322e-15	58	A0A0C4DGB6	ALB	Serum albumin	A0A0C4DGB6_HUMAN	1	158.31	2.5831	Dengue	QC	NaN	NaN	NaN
Dengue / QC	K7EKL3;P28799;P28799-2;P28799-3	K7EKL3;P28799;P28799-2;P28799-3	0.890581	0.890581	4.65348e-16	8.71469e-15	46	K7EKL3;P28799;P28799-2;P28799-3	GRN	Granulins (Fragment);Granulins;Isoform 2 of Granulins;Isoform 3 of Granulins	K7EKL3_HUMAN;GRN_HUMAN;GRN_HUMAN;GRN_HUMAN	2	85.3923	1.85392	Dengue	QC	NaN	NaN	NaN
Dengue / QC	Q68CZ6;Q68CZ6-2	Q68CZ6;Q68CZ6-2	3.51529	3.51529	1.36435e-14	2.16198e-13	26	Q68CZ6;Q68CZ6-2	HAUS3	HAUS augmin-like complex subunit 3;Isoform 2 of HAUS augmin-like complex subunit 3	HAUS3_HUMAN	1	1043.42	11.4342	Dengue	QC	NaN	NaN	NaN
Dengue / QC	Q6UXB8;Q6UXB8-2	Q6UXB8;Q6UXB8-2	0.662942	0.662942	1.6734e-14	2.37738e-13	134	Q6UXB8;Q6UXB8-2	PI16	Peptidase inhibitor 16;Isoform 2 of Peptidase inhibitor 16	PI16_HUMAN	9	58.3308	1.58331	Dengue	QC	NaN	NaN	NaN
Dengue / QC	E9PFZ2	E9PFZ2	1.4255	1.4255	3.2472e-14	4.05408e-13	152	E9PFZ2	CP	Ceruloplasmin	E9PFZ2_HUMAN	2	168.607	2.68607	Dengue	QC	NaN	NaN	NaN
Dengue / QC	P18065	P18065	1.00806	1.00806	1.07209e-13	1.19379e-12	72	P18065	IGFBP2	Insulin-like growth factor-binding protein 2	IBP2_HUMAN	12	101.121	2.01121	Dengue	QC	NaN	NaN	NaN
Dengue / QC	A0A087WYE8;A0A0B4J2B8	A0A087WYE8;A0A0B4J2B8	0.851976	0.851976	3.23098e-13	3.32791e-12	76	A0A087WYE8;A0A0B4J2B8	IGHV1OR21-1;IGHV1OR15-9	Immunoglobulin heavy variable 1/OR21-1 (non-functional) (Fragment);Immunoglobulin heavy variable 1/OR15-9 (non-functional) (Fragment)	A0A087WYE8_HUMAN;A0A0B4J2B8_HUMAN	1	80.4971	1.80497	Dengue	QC	NaN	NaN	NaN
Dengue / QC	P05154	P05154	2.87823	2.87823	7.95555e-13	7.80401e-12	48	P05154	SERPINA5	Plasma serine protease inhibitor	IPSP_HUMAN	5	635.247	7.35247	Dengue	QC	NaN	NaN	NaN
Dengue / QC	P00918	P00918	1.06709	1.06709	6.43845e-12	6.02873e-11	122	P00918	CA2	Carbonic anhydrase 2	CAH2_HUMAN	9	109.52	2.0952	Dengue	QC	NaN	NaN	NaN
Dengue / QC	A0A075B6H7	A0A075B6H7	1.11674	1.11674	1.02434e-11	9.17449e-11	112	A0A075B6H7	IGKV3-7	Immunoglobulin kappa variable 3-7 (non-functional) (Fragment)	A0A075B6H7_HUMAN	1	116.857	2.16857	Dengue	QC	NaN	NaN	NaN
Dengue / QC	O75636	O75636	-0.531412	0.531412	3.69622e-11	3.10784e-10	176	O75636	FCN3	Ficolin-3	FCN3_HUMAN	13	-30.8123	0.691877	Dengue	QC	NaN	NaN	NaN
Dengue / QC	P48740-2	P48740-2	0.711698	0.711698	3.9231e-11	3.23263e-10	104	P48740-2	MASP1	Isoform 2 of Mannan-binding lectin serine protease 1	MASP1_HUMAN	9	63.773	1.63773	Dengue	QC	NaN	NaN	NaN
Dengue / QC	P03950	P03950	1.17542	1.17542	4.48656e-11	3.55473e-10	76	P03950	ANG	Angiogenin	ANGI_HUMAN	6	125.858	2.25858	Dengue	QC	NaN	NaN	NaN
Dengue / QC	P55290;P55290-4	P55290;P55290-4	0.505518	0.505518	8.10898e-11	6.18685e-10	130	P55290;P55290-4	CDH13	Cadherin-13;Isoform 4 of Cadherin-13	CAD13_HUMAN	5	41.9633	1.41963	Dengue	QC	NaN	NaN	NaN
Dengue / QC	A0A286YES5;P01854	A0A286YES5;P01854	2.67347	2.67347	9.29716e-11	6.84005e-10	56	A0A286YES5;P01854	IGHE	Immunoglobulin heavy constant epsilon (Fragment);Immunoglobulin heavy constant epsilon	A0A286YES5_HUMAN;IGHE_HUMAN	9	537.96	6.3796	Dengue	QC	NaN	NaN	NaN
Dengue / QC	I3L3H7;P02452	I3L3H7;P02452	1.52055	1.52055	1.76407e-10	1.17225e-09	30	I3L3H7;P02452	COL1A1	Collagen alpha-1(I) chain (Fragment);Collagen alpha-1(I) chain	I3L3H7_HUMAN;CO1A1_HUMAN	3	186.9	2.869	Dengue	QC	NaN	NaN	NaN
Dengue / QC	A0M8Q6	A0M8Q6	1.85828	1.85828	6.13819e-10	3.64935e-09	152	A0M8Q6	IGLC7	Immunoglobulin lambda constant 7	IGLC7_HUMAN	4	262.576	3.62576	Dengue	QC	NaN	NaN	NaN
Dengue / QC	O95497	O95497	1.09881	1.09881	6.20036e-10	3.64935e-09	56	O95497	VNN1	Pantetheinase	VNN1_HUMAN	5	114.179	2.14179	Dengue	QC	NaN	NaN	NaN
Dengue / QC	P02679;P02679-2	P02679;P02679-2	2.73461	2.73461	1.46844e-09	8.17566e-09	164	P02679;P02679-2	FGG	Fibrinogen gamma chain;Isoform Gamma-A of Fibrinogen gamma chain	FIBG_HUMAN	48	565.581	6.65581	Dengue	QC	NaN	NaN	NaN
Dengue / QC	Q6UX71	Q6UX71	1.00688	1.00688	2.6664e-09	1.40841e-08	86	Q6UX71	PLXDC2	Plexin domain-containing protein 2	PXDC2_HUMAN	7	100.956	2.00956	Dengue	QC	NaN	NaN	NaN
Dengue / QC	P01833	P01833	0.911441	0.911441	4.04866e-09	2.0097e-08	166	P01833	PIGR	Polymeric immunoglobulin receptor	PIGR_HUMAN	17	88.0923	1.88092	Dengue	QC	NaN	NaN	NaN
Dengue / QC	P00488	P00488	0.678926	0.678926	4.82029e-09	2.33642e-08	130	P00488	F13A1	Coagulation factor XIII A chain	F13A_HUMAN	22	60.0948	1.60095	Dengue	QC	NaN	NaN	NaN
Dengue / QC	A0A0B4J1U7	A0A0B4J1U7	-0.785302	0.785302	6.26979e-09	2.96914e-08	176	A0A0B4J1U7	IGHV6-1	Immunoglobulin heavy variable 6-1	HV601_HUMAN	9	-41.977	0.58023	Dengue	QC	NaN	NaN	NaN
Dengue / QC	P02675	P02675	2.51146	2.51146	7.78023e-09	3.60163e-08	166	P02675	FGB	Fibrinogen beta chain	FIBB_HUMAN	53	470.198	5.70198	Dengue	QC	NaN	NaN	NaN
Dengue / QC	E9PJ29;Q86UD1	E9PJ29;Q86UD1	0.918111	0.918111	1.27312e-08	5.46382e-08	92	E9PJ29;Q86UD1	OAF	Out at first protein homolog	E9PJ29_HUMAN;OAF_HUMAN	5	88.964	1.88964	Dengue	QC	NaN	NaN	NaN
Dengue / QC	G3XAP6;P49747	G3XAP6;P49747	0.616855	0.616855	1.54991e-08	6.45012e-08	148	G3XAP6;P49747	COMP	Cartilage oligomeric matrix protein	G3XAP6_HUMAN;COMP_HUMAN	16	53.3528	1.53353	Dengue	QC	NaN	NaN	NaN
Dengue / QC	P07225	P07225	0.32641	0.32641	2.13455e-08	8.75341e-08	176	P07225	PROS1	Vitamin K-dependent protein S	PROS_HUMAN	33	25.3889	1.25389	Dengue	QC	NaN	NaN	NaN
Dengue / QC	P22692;P22692-2	P22692;P22692-2	1.49207	1.49207	2.63605e-08	1.03434e-07	60	P22692;P22692-2	IGFBP4	Insulin-like growth factor-binding protein 4;Isoform 2 of Insulin-like growth factor-binding protein 4	IBP4_HUMAN	4	181.293	2.81293	Dengue	QC	NaN	NaN	NaN
Dengue / QC	Q01518;Q5T0R1;Q5T0R2;Q5T0R3;Q5T0R4;Q5T0R5;Q5T0R6;Q5T0R7	Q01518;Q5T0R1;Q5T0R2;Q5T0R3;Q5T0R4;Q5T0R5;Q5T0R6;Q5T0R7	0.599762	0.599762	2.90971e-08	1.13094e-07	44	Q01518;Q5T0R1;Q5T0R2;Q5T0R3;Q5T0R4;Q5T0R5;Q5T0R6;Q5T0R7	CAP1	Adenylyl cyclase-associated protein 1;Adenylyl cyclase-associated protein 1 (Fragment);Adenylyl cyclase-associated protein 1 (Fragment);Adenylyl cyclase-associated protein 1 (Fragment);Adenylyl cyclase-associated protein 1 (Fragment);Adenylyl cyclase-associated protein 1 (Fragment);Adenylyl cyclase-associated protein 1 (Fragment);Adenylyl cyclase-associated protein 1 (Fragment)	CAP1_HUMAN;Q5T0R1_HUMAN;Q5T0R2_HUMAN;Q5T0R3_HUMAN;Q5T0R4_HUMAN;Q5T0R5_HUMAN;Q5T0R6_HUMAN;Q5T0R7_HUMAN	2	51.5467	1.51547	Dengue	QC	NaN	NaN	NaN
Dengue / QC	P27105	P27105	1.36562	1.36562	3.23728e-08	1.23496e-07	22	P27105	STOM	Erythrocyte band 7 integral membrane protein	STOM_HUMAN	4	157.687	2.57687	Dengue	QC	NaN	NaN	NaN
Dengue / QC	E7EX29;P63104	E7EX29;P63104	1.44072	1.44072	3.61083e-08	1.3473e-07	38	E7EX29;P63104	YWHAZ	14-3-3 protein zeta/delta (Fragment);14-3-3 protein zeta/delta	E7EX29_HUMAN;1433Z_HUMAN	4	171.456	2.71456	Dengue	QC	NaN	NaN	NaN
Dengue / QC	P09172	P09172	0.814712	0.814712	4.59816e-08	1.6765e-07	106	P09172	DBH	Dopamine beta-hydroxylase	DOPO_HUMAN	10	75.8947	1.75895	Dengue	QC	NaN	NaN	NaN
Dengue / QC	P22891;P22891-2	P22891;P22891-2	0.356243	0.356243	4.99254e-08	1.80432e-07	164	P22891;P22891-2	PROZ	Vitamin K-dependent protein Z;Isoform 2 of Vitamin K-dependent protein Z	PROZ_HUMAN	10	28.0088	1.28009	Dengue	QC	NaN	NaN	NaN
Dengue / QC	Q9NPH3;Q9NPH3-2;Q9NPH3-5	Q9NPH3;Q9NPH3-2;Q9NPH3-5	0.523132	0.523132	8.62439e-08	3.03696e-07	110	Q9NPH3;Q9NPH3-2;Q9NPH3-5	IL1RAP	Interleukin-1 receptor accessory protein;Isoform 2 of Interleukin-1 receptor accessory protein;Isoform 4 of Interleukin-1 receptor accessory protein	IL1AP_HUMAN	6	43.7072	1.43707	Dengue	QC	NaN	NaN	NaN
Dengue / QC	P13727	P13727	3.02406	3.02406	8.79935e-08	3.07232e-07	46	P13727	PRG2	Bone marrow proteoglycan	PRG2_HUMAN	5	713.454	8.13454	Dengue	QC	NaN	NaN	NaN
Dengue / QC	P0DOY2	P0DOY2	-0.426919	0.426919	9.02926e-08	3.1261e-07	176	P0DOY2	IGLC2	Immunoglobulin lambda constant 2	IGLC2_HUMAN	20	-25.6152	0.743848	Dengue	QC	NaN	NaN	NaN
Dengue / QC	P05362	P05362	1.8062	1.8062	9.32869e-08	3.20285e-07	26	P05362	ICAM1	Intercellular adhesion molecule 1	ICAM1_HUMAN	9	249.719	3.49719	Dengue	QC	NaN	NaN	NaN
Dengue / QC	P32119	P32119	0.598706	0.598706	1.46882e-07	4.91994e-07	158	P32119	PRDX2	Peroxiredoxin-2	PRDX2_HUMAN	13	51.4357	1.51436	Dengue	QC	NaN	NaN	NaN
Dengue / QC	P00915	P00915	0.789077	0.789077	1.69499e-07	5.58669e-07	152	P00915	CA1	Carbonic anhydrase 1	CAH1_HUMAN	9	72.7969	1.72797	Dengue	QC	NaN	NaN	NaN
Dengue / QC	A0A0U1RR20;Q92954;Q92954-3;Q92954-6	A0A0U1RR20;Q92954;Q92954-3;Q92954-6	0.33141	0.33141	1.77035e-07	5.78877e-07	170	A0A0U1RR20;Q92954;Q92954-3;Q92954-6	PRG4	Proteoglycan 4;Proteoglycan 4;Isoform C of Proteoglycan 4;Isoform F of Proteoglycan 4	A0A0U1RR20_HUMAN;PRG4_HUMAN;PRG4_HUMAN;PRG4_HUMAN	18	25.8242	1.25824	Dengue	QC	NaN	NaN	NaN
Dengue / QC	P02790	P02790	0.318632	0.318632	1.96248e-07	6.30281e-07	176	P02790	HPX	Hemopexin	HEMO_HUMAN	50	24.7148	1.24715	Dengue	QC	NaN	NaN	NaN
Dengue / QC	P02750	P02750	-0.528057	0.528057	2.12203e-07	6.67387e-07	176	P02750	LRG1	Leucine-rich alpha-2-glycoprotein	A2GL_HUMAN	20	-30.6512	0.693488	Dengue	QC	NaN	NaN	NaN
Dengue / QC	A0A087WWU8;P06753-2	A0A087WWU8;P06753-2	0.881302	0.881302	2.19609e-07	6.78891e-07	110	A0A087WWU8;P06753-2	TPM3	Tropomyosin alpha-3 chain;Isoform 2 of Tropomyosin alpha-3 chain	A0A087WWU8_HUMAN;TPM3_HUMAN	17	84.2037	1.84204	Dengue	QC	NaN	NaN	NaN
Dengue / QC	A0A0B4J2D9;P0DP09	A0A0B4J2D9;P0DP09	-0.588527	0.588527	2.22782e-07	6.78891e-07	158	A0A0B4J2D9;P0DP09	IGKV1D-13;IGKV1-13	Immunoglobulin kappa variable 1D-13;Immunoglobulin kappa variable 1-13	KVD13_HUMAN;KV113_HUMAN	3	-33.4979	0.665021	Dengue	QC	NaN	NaN	NaN
Dengue / QC	Q6ZRK6	Q6ZRK6	0.185263	0.185263	2.25013e-07	6.78891e-07	52	Q6ZRK6	CCDC73	Coiled-coil domain-containing protein 73	CCD73_HUMAN	1	13.7024	1.13702	Dengue	QC	NaN	NaN	NaN
Dengue / QC	P40197	P40197	1.2518	1.2518	2.61639e-07	7.62832e-07	66	P40197	GP5	Platelet glycoprotein V	GPV_HUMAN	9	138.138	2.38138	Dengue	QC	NaN	NaN	NaN
Dengue / QC	E7EX60;E9PEP6;O14786;O14786-2;O14786-3;Q5JWQ6;Q5T7F0	E7EX60;E9PEP6;O14786;O14786-2;O14786-3;Q5JWQ6;Q5T7F0	0.687355	0.687355	3.17651e-07	8.96385e-07	82	E7EX60;E9PEP6;O14786;O14786-2;O14786-3;Q5JWQ6;Q5T7F0	NRP1	Neuropilin-1;Neuropilin;Neuropilin-1;Isoform 2 of Neuropilin-1;Isoform 3 of Neuropilin-1;Neuropilin;Neuropilin	E7EX60_HUMAN;E9PEP6_HUMAN;NRP1_HUMAN;NRP1_HUMAN;NRP1_HUMAN;Q5JWQ6_HUMAN;Q5T7F0_HUMAN	3	61.0328	1.61033	Dengue	QC	NaN	NaN	NaN
Dengue / QC	P12955	P12955	0.34554	0.34554	3.79764e-07	1.04308e-06	74	P12955	PEPD	Xaa-Pro dipeptidase	PEPD_HUMAN	10	27.0626	1.27063	Dengue	QC	NaN	NaN	NaN
Dengue / QC	P01859	P01859	-0.352003	0.352003	4.06971e-07	1.11041e-06	176	P01859	IGHG2	Immunoglobulin heavy constant gamma 2	IGHG2_HUMAN	18	-21.6504	0.783496	Dengue	QC	NaN	NaN	NaN
Dengue / QC	P60174;P60174-1;P60174-4	P60174;P60174-1;P60174-4	1.07659	1.07659	4.18826e-07	1.12782e-06	34	P60174;P60174-1;P60174-4	TPI1	Triosephosphate isomerase;Isoform 2 of Triosephosphate isomerase;Isoform 4 of Triosephosphate isomerase	TPIS_HUMAN	4	110.905	2.10905	Dengue	QC	NaN	NaN	NaN
Dengue / QC	P01703	P01703	-0.627524	0.627524	4.52615e-07	1.20308e-06	174	P01703	IGLV1-40	Immunoglobulin lambda variable 1-40	LV140_HUMAN	5	-35.2714	0.647286	Dengue	QC	NaN	NaN	NaN
Dengue / QC	P02751;P02751-15;P02751-3;P02751-7	P02751;P02751-15;P02751-3;P02751-7	0.391661	0.391661	5.12846e-07	1.32888e-06	176	P02751;P02751-15;P02751-3;P02751-7	FN1	Fibronectin;Isoform 15 of Fibronectin;Isoform 3 of Fibronectin;Isoform 7 of Fibronectin	FINC_HUMAN	142	31.1903	1.3119	Dengue	QC	NaN	NaN	NaN
Dengue / QC	A0A0C4DFP6;Q9NQ79;Q9NQ79-2	A0A0C4DFP6;Q9NQ79;Q9NQ79-2	0.380177	0.380177	6.23758e-07	1.57662e-06	170	A0A0C4DFP6;Q9NQ79;Q9NQ79-2	CRTAC1	Cartilage acidic protein 1;Cartilage acidic protein 1;Isoform 2 of Cartilage acidic protein 1	A0A0C4DFP6_HUMAN;CRAC1_HUMAN;CRAC1_HUMAN	15	30.1502	1.3015	Dengue	QC	NaN	NaN	NaN
Dengue / QC	P05160	P05160	0.317207	0.317207	7.48223e-07	1.85703e-06	176	P05160	F13B	Coagulation factor XIII B chain	F13B_HUMAN	47	24.5916	1.24592	Dengue	QC	NaN	NaN	NaN
Dengue / QC	P68871	P68871	0.217449	0.217449	1.07523e-06	2.5314e-06	176	P68871	HBB	Hemoglobin subunit beta	HBB_HUMAN	23	16.2676	1.16268	Dengue	QC	NaN	NaN	NaN
Dengue / QC	Q14624	Q14624	-0.204966	0.204966	1.11963e-06	2.62094e-06	176	Q14624	ITIH4	Inter-alpha-trypsin inhibitor heavy chain H4	ITIH4_HUMAN	68	-13.2441	0.867559	Dengue	QC	NaN	NaN	NaN
Dengue / QC	J3KPA1;P54108;P54108-2;P54108-3	J3KPA1;P54108;P54108-2;P54108-3	0.667455	0.667455	1.22498e-06	2.85137e-06	104	J3KPA1;P54108;P54108-2;P54108-3	CRISP3	Cysteine-rich secretory protein 3;Cysteine-rich secretory protein 3;Isoform 2 of Cysteine-rich secretory protein 3;Isoform 3 of Cysteine-rich secretory protein 3	J3KPA1_HUMAN;CRIS3_HUMAN;CRIS3_HUMAN;CRIS3_HUMAN	7	58.8269	1.58827	Dengue	QC	NaN	NaN	NaN
Dengue / QC	P21333;P21333-2;Q5HY54	P21333;P21333-2;Q5HY54	0.483508	0.483508	1.47667e-06	3.37992e-06	116	P21333;P21333-2;Q5HY54	FLNA	Filamin-A;Isoform 2 of Filamin-A;Filamin-A	FLNA_HUMAN;FLNA_HUMAN;Q5HY54_HUMAN	23	39.8139	1.39814	Dengue	QC	NaN	NaN	NaN
Dengue / QC	A0A075B6S6	A0A075B6S6	0.594915	0.594915	1.64039e-06	3.67305e-06	52	A0A075B6S6	IGKV2D-30	Immunoglobulin kappa variable 2D-30	KVD30_HUMAN	2	51.0384	1.51038	Dengue	QC	NaN	NaN	NaN
Dengue / QC	Q15848	Q15848	0.46243	0.46243	1.92327e-06	4.10562e-06	154	Q15848	ADIPOQ	Adiponectin	ADIPO_HUMAN	5	37.7861	1.37786	Dengue	QC	NaN	NaN	NaN
Dengue / QC	Q16610	Q16610	0.495368	0.495368	2.06883e-06	4.3936e-06	176	Q16610	ECM1	Extracellular matrix protein 1	ECM1_HUMAN	26	40.968	1.40968	Dengue	QC	NaN	NaN	NaN
Dengue / QC	A0A0C4DH32	A0A0C4DH32	0.666013	0.666013	2.09791e-06	4.43251e-06	82	A0A0C4DH32	IGHV3-20	Immunoglobulin heavy variable 3-20	HV320_HUMAN	2	58.6682	1.58668	Dengue	QC	NaN	NaN	NaN
Dengue / QC	Q04756	Q04756	0.313596	0.313596	2.15643e-06	4.5329e-06	176	Q04756	HGFAC	Hepatocyte growth factor activator	HGFA_HUMAN	25	24.2802	1.2428	Dengue	QC	NaN	NaN	NaN
Dengue / QC	P69905	P69905	0.334296	0.334296	2.3127e-06	4.81752e-06	176	P69905	HBA1	Hemoglobin subunit alpha	HBA_HUMAN	23	26.0762	1.26076	Dengue	QC	NaN	NaN	NaN
Dengue / QC	P08246	P08246	1.26713	1.26713	2.36163e-06	4.8894e-06	74	P08246	ELANE	Neutrophil elastase	ELNE_HUMAN	6	140.683	2.40683	Dengue	QC	NaN	NaN	NaN
Dengue / QC	P06681	P06681	0.466751	0.466751	2.69659e-06	5.44606e-06	176	P06681	C2	Complement C2	CO2_HUMAN	12	38.1994	1.38199	Dengue	QC	NaN	NaN	NaN
Dengue / QC	P20742	P20742	1.85235	1.85235	3.24123e-06	6.48246e-06	158	P20742	PZP	Pregnancy zone protein	PZP_HUMAN	49	261.088	3.61088	Dengue	QC	NaN	NaN	NaN
Dengue / QC	P00742	P00742	0.259781	0.259781	3.6255e-06	7.21596e-06	176	P00742	F10	Coagulation factor X	FA10_HUMAN	21	19.7297	1.1973	Dengue	QC	NaN	NaN	NaN
Dengue / QC	A0A0J9YVY3	A0A0J9YVY3	1.26713	1.26713	4.00831e-06	7.86392e-06	50	A0A0J9YVY3	IGHV7-4-1	Immunoglobulin heavy variable 7-4-1	HV741_HUMAN	2	140.682	2.40682	Dengue	QC	NaN	NaN	NaN
Dengue / QC	Q9NZP8	Q9NZP8	-0.316564	0.316564	4.93913e-06	9.42094e-06	176	Q9NZP8	C1RL	Complement C1r subcomponent-like protein	C1RL_HUMAN	13	-19.702	0.80298	Dengue	QC	NaN	NaN	NaN
Dengue / QC	P02671	P02671	1.24698	1.24698	5.00317e-06	9.4991e-06	176	P02671	FGA	Fibrinogen alpha chain	FIBA_HUMAN	73	137.344	2.37344	Dengue	QC	NaN	NaN	NaN
Dengue / QC	P04196	P04196	-0.529747	0.529747	6.01551e-06	1.13168e-05	176	P04196	HRG	Histidine-rich glycoprotein	HRG_HUMAN	29	-30.7324	0.692676	Dengue	QC	NaN	NaN	NaN
Dengue / QC	P01715	P01715	1.16969	1.16969	6.29439e-06	1.17337e-05	118	P01715	IGLV3-1	Immunoglobulin lambda variable 3-1	LV301_HUMAN	2	124.964	2.24964	Dengue	QC	NaN	NaN	NaN
Dengue / QC	E9PK25;G3V1A4;P23528	E9PK25;G3V1A4;P23528	0.587384	0.587384	6.32254e-06	1.17337e-05	78	E9PK25;G3V1A4;P23528	CFL1	Cofilin-1;Cofilin 1 (Non-muscle), isoform CRA_a;Cofilin-1	E9PK25_HUMAN;G3V1A4_HUMAN;COF1_HUMAN	9	50.2519	1.50252	Dengue	QC	NaN	NaN	NaN
Dengue / QC	P03951;P03951-2	P03951;P03951-2	0.424738	0.424738	6.79388e-06	1.25519e-05	132	P03951;P03951-2	F11	Coagulation factor XI;Isoform 2 of Coagulation factor XI	FA11_HUMAN	17	34.2329	1.34233	Dengue	QC	NaN	NaN	NaN
Dengue / QC	P06727	P06727	0.260821	0.260821	6.9008e-06	1.26635e-05	176	P06727	APOA4	Apolipoprotein A-IV	APOA4_HUMAN	51	19.816	1.19816	Dengue	QC	NaN	NaN	NaN
Dengue / QC	C9JEE0	C9JEE0	2.23061	2.23061	7.05515e-06	1.28616e-05	136	C9JEE0	IGLL1	Immunoglobulin lambda-like polypeptide 1 (Fragment)	C9JEE0_HUMAN	1	369.334	4.69334	Dengue	QC	NaN	NaN	NaN
Dengue / QC	P02766	P02766	0.482504	0.482504	7.77499e-06	1.39274e-05	176	P02766	TTR	Transthyretin	TTHY_HUMAN	16	39.7167	1.39717	Dengue	QC	NaN	NaN	NaN
Dengue / QC	Q99969	Q99969	1.94626	1.94626	9.2787e-06	1.61984e-05	34	Q99969	RARRES2	Retinoic acid receptor responder protein 2	RARR2_HUMAN	4	285.375	3.85375	Dengue	QC	NaN	NaN	NaN
Dengue / QC	A0A087WZR4;H0Y4U3;M9MML6;O75015	A0A087WZR4;H0Y4U3;M9MML6;O75015	1.71852	1.71852	9.45538e-06	1.64372e-05	28	A0A087WZR4;H0Y4U3;M9MML6;O75015	FCGR3B	Low affinity immunoglobulin gamma Fc region receptor III-B;Low affinity immunoglobulin gamma Fc region receptor III-B (Fragment);Low affinity immunoglobulin gamma Fc region receptor III-B;Low affinity immunoglobulin gamma Fc region receptor III-B	A0A087WZR4_HUMAN;H0Y4U3_HUMAN;M9MML6_HUMAN;FCG3B_HUMAN	3	229.098	3.29098	Dengue	QC	NaN	NaN	NaN
Dengue / QC	P02763	P02763	-0.286415	0.286415	9.86667e-06	1.70086e-05	176	P02763	ORM1	Alpha-1-acid glycoprotein 1	A1AG1_HUMAN	14	-18.0063	0.819937	Dengue	QC	NaN	NaN	NaN
Dengue / QC	A0A075B6I7	A0A075B6I7	1.17232	1.17232	1.21737e-05	2.05557e-05	26	A0A075B6I7	IGLV5-48	Immunoglobulin lambda variable 5-48 (non-functional)	A0A075B6I7_HUMAN	1	125.373	2.25373	Dengue	QC	NaN	NaN	NaN
Dengue / QC	P08519	P08519	0.676538	0.676538	1.24353e-05	2.09116e-05	176	P08519	LPA	Apolipoprotein(a)	APOA_HUMAN	47	59.83	1.5983	Dengue	QC	NaN	NaN	NaN
Dengue / QC	P04433	P04433	-0.396336	0.396336	1.36201e-05	2.22677e-05	176	P04433	IGKV3-11	Immunoglobulin kappa variable 3-11	KV311_HUMAN	5	-24.0214	0.759786	Dengue	QC	NaN	NaN	NaN
Dengue / QC	A0A0U1RQQ4;Q9UNN8	A0A0U1RQQ4;Q9UNN8	0.595485	0.595485	1.48309e-05	2.41516e-05	72	A0A0U1RQQ4;Q9UNN8	PROCR	Endothelial protein C receptor (Fragment);Endothelial protein C receptor	A0A0U1RQQ4_HUMAN;EPCR_HUMAN	3	51.098	1.51098	Dengue	QC	NaN	NaN	NaN
Dengue / QC	O75594	O75594	1.01755	1.01755	1.8416e-05	2.9523e-05	36	O75594	PGLYRP1	Peptidoglycan recognition protein 1	PGRP1_HUMAN	4	102.448	2.02448	Dengue	QC	NaN	NaN	NaN
Dengue / QC	A0A024R0T9;K7ER74;P02655	A0A024R0T9;K7ER74;P02655	-0.576159	0.576159	2.24035e-05	3.5501e-05	164	A0A024R0T9;K7ER74;P02655	APOC4-APOC2;APOC4-APOC2;APOC2	Apolipoprotein C-II isoform 1;APOC4-APOC2 readthrough (NMD candidate);Apolipoprotein C-II	A0A024R0T9_HUMAN;K7ER74_HUMAN;APOC2_HUMAN	7	-32.9253	0.670747	Dengue	QC	NaN	NaN	NaN
Dengue / QC	O00187	O00187	0.320342	0.320342	2.55904e-05	4.00884e-05	150	O00187	MASP2	Mannan-binding lectin serine protease 2	MASP2_HUMAN	12	24.8627	1.24863	Dengue	QC	NaN	NaN	NaN
Dengue / QC	P01834	P01834	-0.668211	0.668211	3.5905e-05	5.51972e-05	176	P01834	IGKC	Immunoglobulin kappa constant	IGKC_HUMAN	21	-37.0713	0.629287	Dengue	QC	NaN	NaN	NaN
Dengue / QC	E7ESV4;F5H7Y6;P61224;P61224-3;P61224-4	E7ESV4;F5H7Y6;P61224;P61224-3;P61224-4	1.48528	1.48528	3.67395e-05	5.62702e-05	28	E7ESV4;F5H7Y6;P61224;P61224-3;P61224-4	RAP1B	Ras-related protein Rap-1b (Fragment);Ras-related protein Rap-1b;Ras-related protein Rap-1b;Isoform 3 of Ras-related protein Rap-1b;Isoform 4 of Ras-related protein Rap-1b	E7ESV4_HUMAN;F5H7Y6_HUMAN;RAP1B_HUMAN;RAP1B_HUMAN;RAP1B_HUMAN	3	179.971	2.79971	Dengue	QC	NaN	NaN	NaN
Dengue / QC	P02753;Q5VY30	P02753;Q5VY30	0.305238	0.305238	3.72274e-05	5.65967e-05	176	P02753;Q5VY30	RBP4	Retinol-binding protein 4;Retinol binding protein 4, plasma, isoform CRA_b	RET4_HUMAN;Q5VY30_HUMAN	19	23.5623	1.23562	Dengue	QC	NaN	NaN	NaN
Dengue / QC	Q92905	Q92905	0.575375	0.575375	3.7104e-05	5.65967e-05	110	Q92905	COPS5	COP9 signalosome complex subunit 5	CSN5_HUMAN	1	49.0065	1.49006	Dengue	QC	NaN	NaN	NaN
Dengue / QC	A0A0G2JMB2	A0A0G2JMB2	-0.36522	0.36522	4.48567e-05	6.696e-05	176	A0A0G2JMB2	IGHA2	Immunoglobulin heavy constant alpha 2 (Fragment)	A0A0G2JMB2_HUMAN	27	-22.3649	0.776351	Dengue	QC	NaN	NaN	NaN
Dengue / QC	P01871	P01871	-0.863052	0.863052	4.6021e-05	6.845e-05	176	P01871	IGHM	Immunoglobulin heavy constant mu	IGHM_HUMAN	47	-45.0212	0.549788	Dengue	QC	NaN	NaN	NaN
Dengue / QC	E7EUF1;Q13822;Q13822-2;Q13822-3	E7EUF1;Q13822;Q13822-2;Q13822-3	0.505363	0.505363	4.68394e-05	6.94166e-05	58	E7EUF1;Q13822;Q13822-2;Q13822-3	ENPP2	Ectonucleotide pyrophosphatase/phosphodiesterase family member 2;Ectonucleotide pyrophosphatase/phosphodiesterase family member 2;Isoform 2 of Ectonucleotide pyrophosphatase/phosphodiesterase family member 2;Isoform 3 of Ectonucleotide pyrophosphatase/phosphodiesterase family member 2	E7EUF1_HUMAN;ENPP2_HUMAN;ENPP2_HUMAN;ENPP2_HUMAN	12	41.9481	1.41948	Dengue	QC	NaN	NaN	NaN
Dengue / QC	P10720	P10720	-0.330721	0.330721	4.86036e-05	7.1773e-05	162	P10720	PF4V1	Platelet factor 4 variant	PF4V_HUMAN	7	-20.4861	0.795139	Dengue	QC	NaN	NaN	NaN
Dengue / QC	A0A0C4DH25	A0A0C4DH25	-0.647806	0.647806	4.88148e-05	7.18275e-05	176	A0A0C4DH25	IGKV3D-20	Immunoglobulin kappa variable 3D-20	KVD20_HUMAN	2	-36.175	0.63825	Dengue	QC	NaN	NaN	NaN
Dengue / QC	F5H8B0;P08709;P08709-2	F5H8B0;P08709;P08709-2	0.42776	0.42776	5.07825e-05	7.39307e-05	128	F5H8B0;P08709;P08709-2	F7	Coagulation factor VII;Coagulation factor VII;Isoform B of Coagulation factor VII	F5H8B0_HUMAN;FA7_HUMAN;FA7_HUMAN	4	34.5143	1.34514	Dengue	QC	NaN	NaN	NaN
Dengue / QC	P13796	P13796	-0.188645	0.188645	6.30556e-05	8.86652e-05	164	P13796	LCP1	Plastin-2	PLSL_HUMAN	19	-12.2571	0.877429	Dengue	QC	NaN	NaN	NaN
Dengue / QC	P01780	P01780	-0.356451	0.356451	6.35341e-05	8.90342e-05	172	P01780	IGHV3-7	Immunoglobulin heavy variable 3-7	HV307_HUMAN	8	-21.8916	0.781084	Dengue	QC	NaN	NaN	NaN
Dengue / QC	A0A0C4DH67	A0A0C4DH67	-0.305927	0.305927	6.94369e-05	9.66487e-05	176	A0A0C4DH67	IGKV1-8	Immunoglobulin kappa variable 1-8	KV108_HUMAN	7	-19.1078	0.808922	Dengue	QC	NaN	NaN	NaN
Dengue / QC	P43121	P43121	0.5702	0.5702	7.4293e-05	0.000102029	114	P43121	MCAM	Cell surface glycoprotein MUC18	MUC18_HUMAN	8	48.473	1.48473	Dengue	QC	NaN	NaN	NaN
Dengue / QC	P10643	P10643	0.39324	0.39324	8.20667e-05	0.00011233	176	P10643	C7	Complement component C7	CO7_HUMAN	53	31.3339	1.31334	Dengue	QC	NaN	NaN	NaN
Dengue / QC	P05155;P05155-3	P05155;P05155-3	-0.310554	0.310554	8.44468e-05	0.000115206	176	P05155;P05155-3	SERPING1	Plasma protease C1 inhibitor;Isoform 3 of Plasma protease C1 inhibitor	IC1_HUMAN	37	-19.3668	0.806332	Dengue	QC	NaN	NaN	NaN
Dengue / QC	P04217	P04217	-0.293352	0.293352	8.5719e-05	0.000116555	176	P04217	A1BG	Alpha-1B-glycoprotein	A1BG_HUMAN	34	-18.3996	0.816004	Dengue	QC	NaN	NaN	NaN
Dengue / QC	F8VYK9;P24592	F8VYK9;P24592	1.0685	1.0685	9.65582e-05	0.000129583	56	F8VYK9;P24592	IGFBP6	Insulin-like growth factor-binding protein 6	F8VYK9_HUMAN;IBP6_HUMAN	4	109.725	2.09725	Dengue	QC	NaN	NaN	NaN
Dengue / QC	O95445	O95445	0.185033	0.185033	0.000100977	0.000135073	176	O95445	APOM	Apolipoprotein M	APOM_HUMAN	17	13.6843	1.13684	Dengue	QC	NaN	NaN	NaN
Dengue / QC	A0A0C4DH43	A0A0C4DH43	-0.4996	0.4996	0.000110687	0.000146036	176	A0A0C4DH43	IGHV2-70D	Immunoglobulin heavy variable 2-70D	HV70D_HUMAN	10	-29.2697	0.707303	Dengue	QC	NaN	NaN	NaN
Dengue / QC	E9PHK0;P05452	E9PHK0;P05452	0.405331	0.405331	0.000114779	0.000150602	176	E9PHK0;P05452	CLEC3B	Tetranectin	E9PHK0_HUMAN;TETN_HUMAN	11	32.4392	1.32439	Dengue	QC	NaN	NaN	NaN
Dengue / QC	P08294	P08294	0.355487	0.355487	0.000123616	0.000160662	114	P08294	SOD3	Extracellular superoxide dismutase [Cu-Zn]	SODE_HUMAN	5	27.9417	1.27942	Dengue	QC	NaN	NaN	NaN
Dengue / QC	Q14520;Q14520-2	Q14520;Q14520-2	0.336603	0.336603	0.000126725	0.000164184	176	Q14520;Q14520-2	HABP2	Hyaluronan-binding protein 2;Isoform 2 of Hyaluronan-binding protein 2	HABP2_HUMAN	25	26.2779	1.26278	Dengue	QC	NaN	NaN	NaN
Dengue / QC	P51884	P51884	0.605928	0.605928	0.000131785	0.000169145	176	P51884	LUM	Lumican	LUM_HUMAN	21	52.1958	1.52196	Dengue	QC	NaN	NaN	NaN
Dengue / QC	Q12805;Q12805-2;Q12805-4	Q12805;Q12805-2;Q12805-4	0.37882	0.37882	0.000146714	0.000183727	176	Q12805;Q12805-2;Q12805-4	EFEMP1	EGF-containing fibulin-like extracellular matrix protein 1;Isoform 2 of EGF-containing fibulin-like extracellular matrix protein 1;Isoform 4 of EGF-containing fibulin-like extracellular matrix protein 1	FBLN3_HUMAN	19	30.0278	1.30028	Dengue	QC	NaN	NaN	NaN
Dengue / QC	A6XND0;A6XND1;P17936;P17936-2	A6XND0;A6XND1;P17936;P17936-2	0.466585	0.466585	0.000150844	0.000187757	164	A6XND0;A6XND1;P17936;P17936-2	IGFBP3	Insulin-like growth factor-binding protein 3;Insulin-like growth factor binding protein 3 isoform b;Insulin-like growth factor-binding protein 3;Isoform 2 of Insulin-like growth factor-binding protein 3	A6XND0_HUMAN;A6XND1_HUMAN;IBP3_HUMAN;IBP3_HUMAN	11	38.1835	1.38183	Dengue	QC	NaN	NaN	NaN
Dengue / QC	P06310	P06310	-0.313613	0.313613	0.000174327	0.000212493	176	P06310	IGKV2-30	Immunoglobulin kappa variable 2-30	KV230_HUMAN	6	-19.5376	0.804624	Dengue	QC	NaN	NaN	NaN
Dengue / QC	F5GX41;F5GXY9;P12318;P12318-2;V9GY83	F5GX41;F5GXY9;P12318;P12318-2;V9GY83	1.17054	1.17054	0.00021746	0.000259692	52	F5GX41;F5GXY9;P12318;P12318-2;V9GY83	FCGR2A	Low affinity immunoglobulin gamma Fc region receptor II-a;Low affinity immunoglobulin gamma Fc region receptor II-a;Low affinity immunoglobulin gamma Fc region receptor II-a;Isoform 2 of Low affinity immunoglobulin gamma Fc region receptor II-a;Low affinity immunoglobulin gamma Fc region receptor II-a (Fragment)	F5GX41_HUMAN;F5GXY9_HUMAN;FCG2A_HUMAN;FCG2A_HUMAN;V9GY83_HUMAN	2	125.096	2.25096	Dengue	QC	NaN	NaN	NaN
Dengue / QC	Q8NBP7	Q8NBP7	0.961195	0.961195	0.00025798	0.000301099	26	Q8NBP7	PCSK9	Proprotein convertase subtilisin/kexin type 9	PCSK9_HUMAN	7	94.6922	1.94692	Dengue	QC	NaN	NaN	NaN
Dengue / QC	P09486	P09486	2.68989	2.68989	0.000264304	0.000307608	114	P09486	SPARC	SPARC	SPRC_HUMAN	10	545.263	6.45263	Dengue	QC	NaN	NaN	NaN
Dengue / QC	Q15166	Q15166	0.396235	0.396235	0.000274275	0.000318314	72	Q15166	PON3	Serum paraoxonase/lactonase 3	PON3_HUMAN	8	31.6069	1.31607	Dengue	QC	NaN	NaN	NaN
Dengue / QC	P22792	P22792	0.205726	0.205726	0.000312222	0.000356331	176	P22792	CPN2	Carboxypeptidase N subunit 2	CPN2_HUMAN	16	15.3267	1.15327	Dengue	QC	NaN	NaN	NaN
Dengue / QC	A0A075B6J1	A0A075B6J1	0.522584	0.522584	0.000335829	0.000380762	82	A0A075B6J1	IGLV5-37	Immunoglobulin lambda variable 5-37	LV537_HUMAN	2	43.6526	1.43653	Dengue	QC	NaN	NaN	NaN
Dengue / QC	A0A075B6H9	A0A075B6H9	0.367688	0.367688	0.000409577	0.000453617	172	A0A075B6H9	IGLV4-69	Immunoglobulin lambda variable 4-69	LV469_HUMAN	5	29.0283	1.29028	Dengue	QC	NaN	NaN	NaN
Dengue / QC	A0A075B6K2	A0A075B6K2	0.741474	0.741474	0.000418285	0.00046202	42	A0A075B6K2	IGLV3-12	Immunoglobulin lambda variable 3-12	LV312_HUMAN	2	67.1884	1.67188	Dengue	QC	NaN	NaN	NaN
Dengue / QC	P62328	P62328	0.910686	0.910686	0.000455042	0.000495972	74	P62328	TMSB4X	Thymosin beta-4	TYB4_HUMAN	3	87.994	1.87994	Dengue	QC	NaN	NaN	NaN
Dengue / QC	A0A286YEY5;P01877	A0A286YEY5;P01877	1.51913	1.51913	0.000503733	0.000540463	174	A0A286YEY5;P01877	IGHA2	Immunoglobulin heavy constant alpha 2 (Fragment);Immunoglobulin heavy constant alpha 2	A0A286YEY5_HUMAN;IGHA2_HUMAN	5	186.619	2.86619	Dengue	QC	NaN	NaN	NaN
Dengue / QC	A0A0J9YY99	A0A0J9YY99	-0.302367	0.302367	0.000531808	0.000567629	176	A0A0J9YY99	NaN	Uncharacterized protein (Fragment)	A0A0J9YY99_HUMAN	7	-18.9079	0.810921	Dengue	QC	NaN	NaN	NaN
Dengue / QC	P14780	P14780	0.521431	0.521431	0.000560057	0.000594954	118	P14780	MMP9	Matrix metalloproteinase-9	MMP9_HUMAN	14	43.5378	1.43538	Dengue	QC	NaN	NaN	NaN
Dengue / QC	P37802;P37802-2;X6RJP6	P37802;P37802-2;X6RJP6	0.441375	0.441375	0.00056174	0.000594954	88	P37802;P37802-2;X6RJP6	TAGLN2	Transgelin-2;Isoform 2 of Transgelin-2;Transgelin-2 (Fragment)	TAGL2_HUMAN;TAGL2_HUMAN;X6RJP6_HUMAN	8	35.7898	1.3579	Dengue	QC	NaN	NaN	NaN
Dengue / QC	P01701	P01701	-0.374319	0.374319	0.000589015	0.000615925	176	P01701	IGLV1-51	Immunoglobulin lambda variable 1-51	LV151_HUMAN	6	-22.8531	0.771469	Dengue	QC	NaN	NaN	NaN
Dengue / QC	Q08830	Q08830	0.913618	0.913618	0.000693337	0.000712356	76	Q08830	FGL1	Fibrinogen-like protein 1	FGL1_HUMAN	10	88.3763	1.88376	Dengue	QC	NaN	NaN	NaN
Dengue / QC	P02768	P02768	-0.175517	0.175517	0.000700472	0.000717897	176	P02768	ALB	Serum albumin	ALBU_HUMAN	148	-11.455	0.88545	Dengue	QC	NaN	NaN	NaN
Dengue / QC	Q13103	Q13103	0.178627	0.178627	0.000740829	0.000755748	130	Q13103	SPP2	Secreted phosphoprotein 24	SPP24_HUMAN	4	13.1806	1.13181	Dengue	QC	NaN	NaN	NaN
Dengue / QC	A0A087X0M8;O00533;O00533-2	A0A087X0M8;O00533;O00533-2	0.804129	0.804129	0.000741073	0.000755748	148	A0A087X0M8;O00533;O00533-2	CHL1	Neural cell adhesion molecule L1-like protein;Neural cell adhesion molecule L1-like protein;Isoform 2 of Neural cell adhesion molecule L1-like protein	A0A087X0M8_HUMAN;NCHL1_HUMAN;NCHL1_HUMAN	8	74.6091	1.74609	Dengue	QC	NaN	NaN	NaN
Dengue / QC	A0A075B6S9	A0A075B6S9	0.0515134	0.0515134	0.000750966	0.000762064	166	A0A075B6S9	IGKV1D-37	Immunoglobulin kappa variable 1-37 (non-functional) (Fragment)	A0A075B6S9_HUMAN	1	3.63515	1.03635	Dengue	QC	NaN	NaN	NaN
Dengue / QC	P01344;P01344-3	P01344;P01344-3	0.26596	0.26596	0.000788347	0.000792193	174	P01344;P01344-3	IGF2	Insulin-like growth factor II;Isoform 3 of Insulin-like growth factor II	IGF2_HUMAN	5	20.2436	1.20244	Dengue	QC	NaN	NaN	NaN
Dengue / QC	P62805	P62805	1.50032	1.50032	0.000920584	0.000898769	46	P62805	HIST1H4A	Histone H4	H4_HUMAN	5	182.906	2.82906	Dengue	QC	NaN	NaN	NaN
Dengue / QC	P0DJI8	P0DJI8	-0.635508	0.635508	0.000928359	0.000899962	174	P0DJI8	SAA1	Serum amyloid A-1 protein	SAA1_HUMAN	14	-35.6286	0.643714	Dengue	QC	NaN	NaN	NaN
Dengue / QC	P01742	P01742	0.258222	0.258222	0.000954468	0.000916645	160	P01742	IGHV1-69	Immunoglobulin heavy variable 1-69	HV169_HUMAN	2	19.6004	1.196	Dengue	QC	NaN	NaN	NaN
Dengue / QC	E7EPG1;Q13201	E7EPG1;Q13201	0.324976	0.324976	0.000956769	0.000916718	78	E7EPG1;Q13201	MMRN1	Multimerin-1	E7EPG1_HUMAN;MMRN1_HUMAN	4	25.2644	1.25264	Dengue	QC	NaN	NaN	NaN
Dengue / QC	P98160	P98160	0.919769	0.919769	0.000960643	0.000918294	68	P98160	HSPG2	Basement membrane-specific heparan sulfate proteoglycan core protein	PGBM_HUMAN	27	89.1812	1.89181	Dengue	QC	NaN	NaN	NaN
Dengue / QC	P06331	P06331	-0.331875	0.331875	0.000971568	0.000926588	176	P06331	IGHV4-34	Immunoglobulin heavy variable 4-34	HV434_HUMAN	5	-20.5497	0.794503	Dengue	QC	NaN	NaN	NaN
Dengue / QC	A0A0C4DH33	A0A0C4DH33	-0.22443	0.22443	0.00102649	0.000972218	172	A0A0C4DH33	IGHV1-24	Immunoglobulin heavy variable 1-24	HV124_HUMAN	3	-14.4067	0.855933	Dengue	QC	NaN	NaN	NaN
Dengue / QC	P01817	P01817	-0.230207	0.230207	0.00104421	0.000986735	142	P01817	IGHV2-5	Immunoglobulin heavy variable 2-5	HV205_HUMAN	7	-14.7488	0.852512	Dengue	QC	NaN	NaN	NaN
Dengue / QC	P08253;P08253-2;P08253-3	P08253;P08253-2;P08253-3	0.528624	0.528624	0.00108498	0.00102058	44	P08253;P08253-2;P08253-3	MMP2	72 kDa type IV collagenase;Isoform 2 of 72 kDa type IV collagenase;Isoform 3 of 72 kDa type IV collagenase	MMP2_HUMAN	8	44.2552	1.44255	Dengue	QC	NaN	NaN	NaN
Dengue / QC	P01704	P01704	-0.498506	0.498506	0.00113021	0.00105588	150	P01704	IGLV2-14	Immunoglobulin lambda variable 2-14	LV214_HUMAN	1	-29.216	0.70784	Dengue	QC	NaN	NaN	NaN
Dengue / QC	E9PKE3;P11142	E9PKE3;P11142	0.512056	0.512056	0.00123327	0.00114438	66	E9PKE3;P11142	HSPA8	Heat shock cognate 71 kDa protein	E9PKE3_HUMAN;HSP7C_HUMAN	13	42.6081	1.42608	Dengue	QC	NaN	NaN	NaN
Dengue / QC	Q9UGM5	Q9UGM5	-0.502083	0.502083	0.00133675	0.00123208	176	Q9UGM5	FETUB	Fetuin-B	FETUB_HUMAN	12	-29.3913	0.706087	Dengue	QC	NaN	NaN	NaN
Dengue / QC	P23142	P23142	0.305239	0.305239	0.00142581	0.00130541	176	P23142	FBLN1	Fibulin-1	FBLN1_HUMAN	30	23.5623	1.23562	Dengue	QC	NaN	NaN	NaN
Dengue / QC	P00450	P00450	-0.514216	0.514216	0.00146093	0.0013346	176	P00450	CP	Ceruloplasmin	CERU_HUMAN	95	-29.9827	0.700173	Dengue	QC	NaN	NaN	NaN
Dengue / QC	P0DP08	P0DP08	0.505403	0.505403	0.00149898	0.00136031	32	P0DP08	IGHV4-38-2	Immunoglobulin heavy variable 4-38-2	HVD82_HUMAN	2	41.952	1.41952	Dengue	QC	NaN	NaN	NaN
Dengue / QC	P67936	P67936	0.71095	0.71095	0.00157179	0.00142325	76	P67936	TPM4	Tropomyosin alpha-4 chain	TPM4_HUMAN	11	63.6881	1.63688	Dengue	QC	NaN	NaN	NaN
Dengue / QC	P06312	P06312	-0.289618	0.289618	0.00159438	0.00143172	176	P06312	IGKV4-1	Immunoglobulin kappa variable 4-1	KV401_HUMAN	7	-18.1882	0.818118	Dengue	QC	NaN	NaN	NaN
Dengue / QC	A0A087WSY6	A0A087WSY6	-0.266377	0.266377	0.00159505	0.00143172	176	A0A087WSY6	IGKV3D-15	Immunoglobulin kappa variable 3D-15	KVD15_HUMAN	1	-16.8595	0.831405	Dengue	QC	NaN	NaN	NaN
Dengue / QC	Q15113	Q15113	0.830888	0.830888	0.00164845	0.00147004	56	Q15113	PCOLCE	Procollagen C-endopeptidase enhancer 1	PCOC1_HUMAN	9	77.878	1.77878	Dengue	QC	NaN	NaN	NaN
Dengue / QC	A0A075B6S2;A2NJV5	A0A075B6S2;A2NJV5	0.562111	0.562111	0.00169939	0.0015122	160	A0A075B6S2;A2NJV5	IGKV2D-29;IGKV2-29	Immunoglobulin kappa variable 2D-29;Immunoglobulin kappa variable 2-29	KVD29_HUMAN;KV229_HUMAN	3	47.6428	1.47643	Dengue	QC	NaN	NaN	NaN
Dengue / QC	P05164;P05164-2;P05164-3	P05164;P05164-2;P05164-3	0.454697	0.454697	0.00201308	0.00176466	110	P05164;P05164-2;P05164-3	MPO	Myeloperoxidase;Isoform H14 of Myeloperoxidase;Isoform H7 of Myeloperoxidase	PERM_HUMAN	19	37.0494	1.37049	Dengue	QC	NaN	NaN	NaN
Dengue / QC	P19652	P19652	-0.327509	0.327509	0.00202581	0.00177205	176	P19652	ORM2	Alpha-1-acid glycoprotein 2	A1AG2_HUMAN	21	-20.3089	0.796911	Dengue	QC	NaN	NaN	NaN
Dengue / QC	P07195	P07195	-0.528422	0.528422	0.00206291	0.00179687	140	P07195	LDHB	L-lactate dehydrogenase B chain	LDHB_HUMAN	12	-30.6687	0.693313	Dengue	QC	NaN	NaN	NaN
Dengue / QC	A0A0G2JRQ6	A0A0G2JRQ6	0.317967	0.317967	0.00235508	0.00202566	176	A0A0G2JRQ6	NaN	Uncharacterized protein (Fragment)	A0A0G2JRQ6_HUMAN	5	24.6573	1.24657	Dengue	QC	NaN	NaN	NaN
Dengue / QC	P01008	P01008	0.123419	0.123419	0.0024506	0.00209036	176	P01008	SERPINC1	Antithrombin-III	ANT3_HUMAN	47	8.93136	1.08931	Dengue	QC	NaN	NaN	NaN
Dengue / QC	P01593;P01594	P01593;P01594	-0.273324	0.273324	0.00244788	0.00209036	176	P01593;P01594	IGKV1D-33;IGKV1-33	Immunoglobulin kappa variable 1D-33;Immunoglobulin kappa variable 1-33	KVD33_HUMAN;KV133_HUMAN	4	-17.2589	0.827411	Dengue	QC	NaN	NaN	NaN
Dengue / QC	A0A0A0MRJ7;P12259	A0A0A0MRJ7;P12259	0.196852	0.196852	0.0024693	0.002101	176	A0A0A0MRJ7;P12259	F5	Coagulation factor V	A0A0A0MRJ7_HUMAN;FA5_HUMAN	56	14.6194	1.14619	Dengue	QC	NaN	NaN	NaN
Dengue / QC	A0A0A0MS15	A0A0A0MS15	-0.477796	0.477796	0.00249092	0.00211165	176	A0A0A0MS15	IGHV3-49	Immunoglobulin heavy variable 3-49	HV349_HUMAN	9	-28.1926	0.718074	Dengue	QC	NaN	NaN	NaN
Dengue / QC	A0A0C4DH72	A0A0C4DH72	-0.301832	0.301832	0.00251966	0.00213162	176	A0A0C4DH72	IGKV1-6	Immunoglobulin kappa variable 1-6	KV106_HUMAN	5	-18.8779	0.811221	Dengue	QC	NaN	NaN	NaN
Dengue / QC	A0A182DWH7;P49908	A0A182DWH7;P49908	0.154543	0.154543	0.00257015	0.00215922	176	A0A182DWH7;P49908	SELENOP	Selenoprotein P (Fragment);Selenoprotein P	A0A182DWH7_HUMAN;SEPP1_HUMAN	9	11.3069	1.11307	Dengue	QC	NaN	NaN	NaN
Dengue / QC	B0YIW2;P02656	B0YIW2;P02656	-0.292591	0.292591	0.00262031	0.00218536	176	B0YIW2;P02656	APOC3	Apolipoprotein C-III	B0YIW2_HUMAN;APOC3_HUMAN	6	-18.3566	0.816434	Dengue	QC	NaN	NaN	NaN
Dengue / QC	A0A075B6K5	A0A075B6K5	-0.387475	0.387475	0.00284453	0.00235119	176	A0A075B6K5	IGLV3-9	Immunoglobulin lambda variable 3-9	LV39_HUMAN	5	-23.5533	0.764467	Dengue	QC	NaN	NaN	NaN
Dengue / QC	P00338;P00338-3	P00338;P00338-3	-0.579306	0.579306	0.00284768	0.00235119	122	P00338;P00338-3	LDHA	L-lactate dehydrogenase A chain;Isoform 3 of L-lactate dehydrogenase A chain	LDHA_HUMAN	9	-33.0714	0.669286	Dengue	QC	NaN	NaN	NaN
Dengue / QC	Q03591	Q03591	0.233389	0.233389	0.00285719	0.00235433	176	Q03591	CFHR1	Complement factor H-related protein 1	FHR1_HUMAN	9	17.5593	1.17559	Dengue	QC	NaN	NaN	NaN
Dengue / QC	P02765	P02765	0.159181	0.159181	0.00289409	0.00237922	176	P02765	AHSG	Alpha-2-HS-glycoprotein	FETUA_HUMAN	23	11.6653	1.11665	Dengue	QC	NaN	NaN	NaN
Dengue / QC	Q92496;Q92496-2	Q92496;Q92496-2	0.254624	0.254624	0.00346493	0.00278586	168	Q92496;Q92496-2	CFHR4	Complement factor H-related protein 4;Isoform 2 of Complement factor H-related protein 4	FHR4_HUMAN	12	19.3025	1.19302	Dengue	QC	NaN	NaN	NaN
Dengue / QC	Q08211	Q08211	-0.475658	0.475658	0.00356257	0.00285005	154	Q08211	DHX9	ATP-dependent RNA helicase A	DHX9_HUMAN	2	-28.0861	0.719139	Dengue	QC	NaN	NaN	NaN
Dengue / QC	A0A0J9YW62	A0A0J9YW62	0.764476	0.764476	0.00363331	0.00288424	76	A0A0J9YW62	NaN	Uncharacterized protein (Fragment)	A0A0J9YW62_HUMAN	1	69.8753	1.69875	Dengue	QC	NaN	NaN	NaN
Dengue / QC	P01023	P01023	-0.223473	0.223473	0.00378451	0.00299268	176	P01023	A2M	Alpha-2-macroglobulin	A2MG_HUMAN	162	-14.3499	0.856501	Dengue	QC	NaN	NaN	NaN
Dengue / QC	P04040	P04040	0.667865	0.667865	0.00387572	0.00305315	104	P04040	CAT	Catalase	CATA_HUMAN	15	58.872	1.58872	Dengue	QC	NaN	NaN	NaN
Dengue / QC	P19320	P19320	0.499627	0.499627	0.00391097	0.00307504	150	P19320	VCAM1	Vascular cell adhesion protein 1	VCAM1_HUMAN	17	41.3848	1.41385	Dengue	QC	NaN	NaN	NaN
Dengue / QC	P0DOY3	P0DOY3	0.486534	0.486534	0.00409979	0.00321736	148	P0DOY3	IGLC3	Immunoglobulin lambda constant 3	IGLC3_HUMAN	3	40.1074	1.40107	Dengue	QC	NaN	NaN	NaN
Dengue / QC	P37837	P37837	1.66929	1.66929	0.00428566	0.00333779	36	P37837	TALDO1	Transaldolase	TALDO_HUMAN	4	218.059	3.18059	Dengue	QC	NaN	NaN	NaN
Dengue / QC	P01624	P01624	-0.421847	0.421847	0.00437107	0.00339149	176	P01624	IGKV3-15	Immunoglobulin kappa variable 3-15	KV315_HUMAN	3	-25.3532	0.746468	Dengue	QC	NaN	NaN	NaN
Dengue / QC	P36980;P36980-2	P36980;P36980-2	0.206609	0.206609	0.00466989	0.00360299	176	P36980;P36980-2	CFHR2	Complement factor H-related protein 2;Isoform Short of Complement factor H-related protein 2	FHR2_HUMAN	5	15.3973	1.15397	Dengue	QC	NaN	NaN	NaN
Dengue / QC	P02749	P02749	0.0531272	0.0531272	0.00471267	0.0036292	176	P02749	APOH	Beta-2-glycoprotein 1	APOH_HUMAN	30	3.75114	1.03751	Dengue	QC	NaN	NaN	NaN
Dengue / QC	H3BMH2;H3BSC1;P62491;P62491-2;Q15907;Q15907-2	H3BMH2;H3BSC1;P62491;P62491-2;Q15907;Q15907-2	0.678425	0.678425	0.00475445	0.00364609	32	H3BMH2;H3BSC1;P62491;P62491-2;Q15907;Q15907-2	RAB11A;RAB11A;RAB11A;RAB11A;RAB11B;RAB11B	Ras-related protein Rab-11A (Fragment);Ras-related protein Rab-11A;Ras-related protein Rab-11A;Isoform 2 of Ras-related protein Rab-11A;Ras-related protein Rab-11B;Isoform 2 of Ras-related protein Rab-11B	H3BMH2_HUMAN;H3BSC1_HUMAN;RB11A_HUMAN;RB11A_HUMAN;RB11B_HUMAN;RB11B_HUMAN	3	60.0392	1.60039	Dengue	QC	NaN	NaN	NaN
Dengue / QC	Q06033;Q06033-2	Q06033;Q06033-2	-0.151179	0.151179	0.00504967	0.00383142	176	Q06033;Q06033-2	ITIH3	Inter-alpha-trypsin inhibitor heavy chain H3;Isoform 2 of Inter-alpha-trypsin inhibitor heavy chain H3	ITIH3_HUMAN	44	-9.94861	0.900514	Dengue	QC	NaN	NaN	NaN
Dengue / QC	P28072	P28072	2.24121	2.24121	0.0051493	0.00389268	34	P28072	PSMB6	Proteasome subunit beta type-6	PSB6_HUMAN	3	372.795	4.72795	Dengue	QC	NaN	NaN	NaN
Dengue / QC	P59665;P59666	P59665;P59666	-0.357797	0.357797	0.00566581	0.00422883	174	P59665;P59666	DEFA1;DEFA3	Neutrophil defensin 1;Neutrophil defensin 3	DEF1_HUMAN;DEF3_HUMAN	5	-21.9645	0.780355	Dengue	QC	NaN	NaN	NaN
Dengue / QC	P28070	P28070	1.91446	1.91446	0.00594025	0.00439387	40	P28070	PSMB4	Proteasome subunit beta type-4	PSB4_HUMAN	2	276.974	3.76974	Dengue	QC	NaN	NaN	NaN
Dengue / QC	P01782	P01782	-0.378794	0.378794	0.00613099	0.00451066	176	P01782	IGHV3-9	Immunoglobulin heavy variable 3-9	HV309_HUMAN	9	-23.092	0.76908	Dengue	QC	NaN	NaN	NaN
Dengue / QC	A0A0C4DGZ8;P07359	A0A0C4DGZ8;P07359	1.88118	1.88118	0.00644927	0.00470283	82	A0A0C4DGZ8;P07359	GP1BA	Glycoprotein Ib (Platelet), alpha polypeptide;Platelet glycoprotein Ib alpha chain	A0A0C4DGZ8_HUMAN;GP1BA_HUMAN	7	268.375	3.68375	Dengue	QC	NaN	NaN	NaN
Dengue / QC	P15144	P15144	0.664834	0.664834	0.00659596	0.0048013	50	P15144	ANPEP	Aminopeptidase N	AMPN_HUMAN	10	58.5386	1.58539	Dengue	QC	NaN	NaN	NaN
Dengue / QC	A0A0B4J2H0	A0A0B4J2H0	0.656175	0.656175	0.0067247	0.00488638	176	A0A0B4J2H0	IGHV1-69D	Immunoglobulin heavy variable 1-69D	HV69D_HUMAN	5	57.5898	1.5759	Dengue	QC	NaN	NaN	NaN
Dengue / QC	Q9UNW1	Q9UNW1	0.473457	0.473457	0.00677766	0.00491619	46	Q9UNW1	MINPP1	Multiple inositol polyphosphate phosphatase 1	MINP1_HUMAN	5	38.8432	1.38843	Dengue	QC	NaN	NaN	NaN
Dengue / QC	P01705	P01705	-0.446747	0.446747	0.00691449	0.00499784	154	P01705	IGLV2-23	Immunoglobulin lambda variable 2-23	LV223_HUMAN	2	-26.6305	0.733695	Dengue	QC	NaN	NaN	NaN
Dengue / QC	O15439;O15439-2;O15439-3;O15439-4	O15439;O15439-2;O15439-3;O15439-4	0.245056	0.245056	0.00696316	0.00502421	124	O15439;O15439-2;O15439-3;O15439-4	ABCC4	Multidrug resistance-associated protein 4;Isoform 2 of Multidrug resistance-associated protein 4;Isoform 3 of Multidrug resistance-associated protein 4;Isoform 4 of Multidrug resistance-associated protein 4	MRP4_HUMAN	1	18.5139	1.18514	Dengue	QC	NaN	NaN	NaN
Dengue / QC	P02774;P02774-3	P02774;P02774-3	0.159696	0.159696	0.00728603	0.00523882	176	P02774;P02774-3	GC	Vitamin D-binding protein;Isoform 3 of Vitamin D-binding protein	VTDB_HUMAN	66	11.7052	1.11705	Dengue	QC	NaN	NaN	NaN
Dengue / QC	P42126;P42126-2	P42126;P42126-2	3.64655	3.64655	0.00738768	0.00530266	10	P42126;P42126-2	ECI1	Enoyl-CoA delta isomerase 1, mitochondrial;Isoform 2 of Enoyl-CoA delta isomerase 1, mitochondrial	ECI1_HUMAN	1	1152.34	12.5234	Dengue	QC	NaN	NaN	NaN
Dengue / QC	P01011	P01011	-0.19329	0.19329	0.00774539	0.0055305	176	P01011	SERPINA3	Alpha-1-antichymotrypsin	AACT_HUMAN	39	-12.5391	0.874609	Dengue	QC	NaN	NaN	NaN
Dengue / QC	P34096	P34096	1.4508	1.4508	0.00782367	0.0055671	42	P34096	RNASE4	Ribonuclease 4	RNAS4_HUMAN	5	173.359	2.73359	Dengue	QC	NaN	NaN	NaN
Dengue / QC	A0A0A0MT36	A0A0A0MT36	0.450748	0.450748	0.00787325	0.0055895	174	A0A0A0MT36	IGKV6D-21	Immunoglobulin kappa variable 6D-21	KVD21_HUMAN	5	36.6749	1.36675	Dengue	QC	NaN	NaN	NaN
Dengue / QC	A0A0C4DH24	A0A0C4DH24	-0.339945	0.339945	0.00789585	0.0055895	138	A0A0C4DH24	IGKV6-21	Immunoglobulin kappa variable 6-21	KV621_HUMAN	1	-20.9928	0.790072	Dengue	QC	NaN	NaN	NaN
Dengue / QC	J3KNB4;P49913	J3KNB4;P49913	0.706474	0.706474	0.00791052	0.00559028	110	J3KNB4;P49913	CAMP	Cathelicidin antimicrobial peptide	J3KNB4_HUMAN;CAMP_HUMAN	6	63.1812	1.63181	Dengue	QC	NaN	NaN	NaN
Dengue / QC	A0A0C4DH38	A0A0C4DH38	-0.240477	0.240477	0.00801073	0.00563961	176	A0A0C4DH38	IGHV5-51	Immunoglobulin heavy variable 5-51	HV551_HUMAN	8	-15.3534	0.846466	Dengue	QC	NaN	NaN	NaN
Dengue / QC	A0A0C4DH35	A0A0C4DH35	-0.48882	0.48882	0.00812393	0.00569228	176	A0A0C4DH35	IGHV3-35	Immunoglobulin heavy variable 3-35 (non-functional) (Fragment)	A0A0C4DH35_HUMAN	3	-28.7392	0.712608	Dengue	QC	NaN	NaN	NaN
Dengue / QC	P80188;P80188-2;X6R8F3	P80188;P80188-2;X6R8F3	0.702397	0.702397	0.00885029	0.00613859	78	P80188;P80188-2;X6R8F3	LCN2	Neutrophil gelatinase-associated lipocalin;Isoform 2 of Neutrophil gelatinase-associated lipocalin;Neutrophil gelatinase-associated lipocalin	NGAL_HUMAN;NGAL_HUMAN;X6R8F3_HUMAN	3	62.7206	1.62721	Dengue	QC	NaN	NaN	NaN
Dengue / QC	A0A0A0MSA9;A0A0C4DG49;P15151;P15151-2;P15151-3;P15151-4	A0A0A0MSA9;A0A0C4DG49;P15151;P15151-2;P15151-3;P15151-4	0.192875	0.192875	0.00886864	0.00614097	94	A0A0A0MSA9;A0A0C4DG49;P15151;P15151-2;P15151-3;P15151-4	PVR	Poliovirus receptor;Poliovirus receptor;Poliovirus receptor;Isoform Beta of Poliovirus receptor;Isoform Gamma of Poliovirus receptor;Isoform Delta of Poliovirus receptor	A0A0A0MSA9_HUMAN;A0A0C4DG49_HUMAN;PVR_HUMAN;PVR_HUMAN;PVR_HUMAN;PVR_HUMAN	3	14.3039	1.14304	Dengue	QC	NaN	NaN	NaN
Dengue / QC	A0A075B6R2	A0A075B6R2	-0.395123	0.395123	0.00897988	0.00619717	176	A0A075B6R2	IGHV4-4	Immunoglobulin heavy variable 4-4	HV404_HUMAN	8	-23.9575	0.760425	Dengue	QC	NaN	NaN	NaN
Dengue / QC	Q96PD5	Q96PD5	-0.290998	0.290998	0.00908784	0.00626119	176	Q96PD5	PGLYRP2	N-acetylmuramoyl-L-alanine amidase	PGRP2_HUMAN	33	-18.2663	0.817337	Dengue	QC	NaN	NaN	NaN
Dengue / QC	P05543	P05543	-0.449791	0.449791	0.00939314	0.00643922	176	P05543	SERPINA7	Thyroxine-binding globulin	THBG_HUMAN	20	-26.7851	0.732149	Dengue	QC	NaN	NaN	NaN
Dengue / QC	A0A075B6Q5	A0A075B6Q5	-0.262491	0.262491	0.00940918	0.00643951	118	A0A075B6Q5	IGHV3-64	Immunoglobulin heavy variable 3-64	HV364_HUMAN	2	-16.6353	0.833647	Dengue	QC	NaN	NaN	NaN
Dengue / QC	Q9Y6R7	Q9Y6R7	0.482538	0.482538	0.00943152	0.00644409	176	Q9Y6R7	FCGBP	IgGFc-binding protein	FCGBP_HUMAN	63	39.7199	1.3972	Dengue	QC	NaN	NaN	NaN
Dengue / QC	P04003	P04003	0.152611	0.152611	0.0102753	0.00695143	176	P04003	C4BPA	C4b-binding protein alpha chain	C4BPA_HUMAN	49	11.158	1.11158	Dengue	QC	NaN	NaN	NaN
Dengue / QC	P00734	P00734	0.122664	0.122664	0.0104066	0.00701723	176	P00734	F2	Prothrombin	THRB_HUMAN	39	8.87431	1.08874	Dengue	QC	NaN	NaN	NaN
Dengue / QC	H0Y300	H0Y300	1.21171	1.21171	0.0106028	0.00713786	34	H0Y300	HP	Haptoglobin	H0Y300_HUMAN	2	131.612	2.31612	Dengue	QC	NaN	NaN	NaN
Dengue / QC	A0A075B6K6	A0A075B6K6	0.547503	0.547503	0.0108242	0.00726315	16	A0A075B6K6	IGLV4-3	Immunoglobulin lambda variable 4-3	LV403_HUMAN	3	46.1554	1.46155	Dengue	QC	NaN	NaN	NaN
Dengue / QC	P01034	P01034	-0.232871	0.232871	0.0109763	0.00732939	176	P01034	CST3	Cystatin-C	CYTC_HUMAN	9	-14.906	0.85094	Dengue	QC	NaN	NaN	NaN
Dengue / QC	P26038	P26038	0.683586	0.683586	0.0111129	0.00738468	60	P26038	MSN	Moesin	MOES_HUMAN	13	60.6127	1.60613	Dengue	QC	NaN	NaN	NaN
Dengue / QC	J3KSI6;Q14126	J3KSI6;Q14126	0.491085	0.491085	0.011305	0.00748818	50	J3KSI6;Q14126	DSG2	Desmoglein-2	J3KSI6_HUMAN;DSG2_HUMAN	1	40.5501	1.4055	Dengue	QC	NaN	NaN	NaN
Dengue / QC	P06396	P06396	0.133285	0.133285	0.0113376	0.00749774	176	P06396	GSN	Gelsolin	GELS_HUMAN	65	9.67883	1.09679	Dengue	QC	NaN	NaN	NaN
Dengue / QC	P02042	P02042	0.205633	0.205633	0.0117187	0.00770032	158	P02042	HBD	Hemoglobin subunit delta	HBD_HUMAN	4	15.3192	1.15319	Dengue	QC	NaN	NaN	NaN
Dengue / QC	A0A0C4DH34	A0A0C4DH34	-0.134439	0.134439	0.0125364	0.00821147	176	A0A0C4DH34	IGHV4-28	Immunoglobulin heavy variable 4-28	HV428_HUMAN	5	-8.8976	0.911024	Dengue	QC	NaN	NaN	NaN
Dengue / QC	P07237	P07237	0.694027	0.694027	0.0133704	0.00867497	10	P07237	P4HB	Protein disulfide-isomerase	PDIA1_HUMAN	5	61.7793	1.61779	Dengue	QC	NaN	NaN	NaN
Dengue / QC	P16930;P16930-2	P16930;P16930-2	3.44519	3.44519	0.0149633	0.00960263	58	P16930;P16930-2	FAH	Fumarylacetoacetase;Isoform 2 of Fumarylacetoacetase	FAAA_HUMAN	4	989.197	10.892	Dengue	QC	NaN	NaN	NaN
Dengue / QC	D6RF35	D6RF35	-0.118664	0.118664	0.0152941	0.00978443	166	D6RF35	GC	Vitamin D-binding protein	D6RF35_HUMAN	3	-7.89596	0.92104	Dengue	QC	NaN	NaN	NaN
Dengue / QC	P04406	P04406	0.318078	0.318078	0.0158996	0.0100869	76	P04406	GAPDH	Glyceraldehyde-3-phosphate dehydrogenase	G3P_HUMAN	11	24.6668	1.24667	Dengue	QC	NaN	NaN	NaN
Dengue / QC	P04211	P04211	-0.130741	0.130741	0.0163741	0.0103468	176	P04211	IGLV7-43	Immunoglobulin lambda variable 7-43	LV743_HUMAN	5	-8.66375	0.913362	Dengue	QC	NaN	NaN	NaN
Dengue / QC	B5MDF5;J3KQE5;P62826	B5MDF5;J3KQE5;P62826	-1.741	1.741	0.017133	0.0107176	46	B5MDF5;J3KQE5;P62826	RAN	GTP-binding nuclear protein Ran;GTP-binding nuclear protein Ran (Fragment);GTP-binding nuclear protein Ran	B5MDF5_HUMAN;J3KQE5_HUMAN;RAN_HUMAN	3	-70.0838	0.299162	Dengue	QC	NaN	NaN	NaN
Dengue / QC	P07900;P07900-2	P07900;P07900-2	1.64294	1.64294	0.0183054	0.0113753	48	P07900;P07900-2	HSP90AA1	Heat shock protein HSP 90-alpha;Isoform 2 of Heat shock protein HSP 90-alpha	HS90A_HUMAN	9	212.303	3.12303	Dengue	QC	NaN	NaN	NaN
Dengue / QC	Q08380	Q08380	-0.258439	0.258439	0.0201013	0.0122874	176	Q08380	LGALS3BP	Galectin-3-binding protein	LG3BP_HUMAN	28	-16.4008	0.835992	Dengue	QC	NaN	NaN	NaN
Dengue / QC	P02649	P02649	0.378772	0.378772	0.0211	0.0128029	176	P02649	APOE	Apolipoprotein E	APOE_HUMAN	37	30.0234	1.30023	Dengue	QC	NaN	NaN	NaN
Dengue / QC	Q9Y490	Q9Y490	0.789998	0.789998	0.0219031	0.0132124	38	Q9Y490	TLN1	Talin-1	TLN1_HUMAN	35	72.9072	1.72907	Dengue	QC	NaN	NaN	NaN
Dengue / QC	A0A0B4J231;B9A064	A0A0B4J231;B9A064	-0.291859	0.291859	0.0223858	0.013446	176	A0A0B4J231;B9A064	IGLL5	Immunoglobulin lambda-like polypeptide 5	A0A0B4J231_HUMAN;IGLL5_HUMAN	9	-18.3151	0.816849	Dengue	QC	NaN	NaN	NaN
Dengue / QC	P04114	P04114	0.125881	0.125881	0.0229604	0.01367	176	P04114	APOB	Apolipoprotein B-100	APOB_HUMAN	367	9.11737	1.09117	Dengue	QC	NaN	NaN	NaN
Dengue / QC	P55058	P55058	0.173283	0.173283	0.0229144	0.01367	162	P55058	PLTP	Phospholipid transfer protein	PLTP_HUMAN	13	12.7622	1.12762	Dengue	QC	NaN	NaN	NaN
Dengue / QC	P01718	P01718	-0.382767	0.382767	0.0251112	0.0147376	170	P01718	IGLV3-27	Immunoglobulin lambda variable 3-27	LV327_HUMAN	4	-23.3035	0.766965	Dengue	QC	NaN	NaN	NaN
Dengue / QC	P05546	P05546	0.0959552	0.0959552	0.0252565	0.0148018	176	P05546	SERPIND1	Heparin cofactor 2	HEP2_HUMAN	30	6.87728	1.06877	Dengue	QC	NaN	NaN	NaN
Dengue / QC	P68032;P68133	P68032;P68133	0.295359	0.295359	0.0257379	0.0150396	60	P68032;P68133	ACTC1;ACTA1	Actin, alpha cardiac muscle 1;Actin, alpha skeletal muscle	ACTC_HUMAN;ACTS_HUMAN	3	22.719	1.22719	Dengue	QC	NaN	NaN	NaN
Dengue / QC	P00739	P00739	0.372014	0.372014	0.028725	0.0165058	176	P00739	HPR	Haptoglobin-related protein	HPTR_HUMAN	18	29.4158	1.29416	Dengue	QC	NaN	NaN	NaN
Dengue / QC	Q9UEU0;Q9UEU0-2	Q9UEU0;Q9UEU0-2	0.175669	0.175669	0.0287024	0.0165058	126	Q9UEU0;Q9UEU0-2	VTI1B	Vesicle transport through interaction with t-SNAREs homolog 1B;Isoform Short of Vesicle transport through interaction with t-SNAREs homolog 1B	VTI1B_HUMAN	1	12.9488	1.12949	Dengue	QC	NaN	NaN	NaN
Dengue / QC	P01743	P01743	-0.247977	0.247977	0.0308435	0.0175251	166	P01743	IGHV1-46	Immunoglobulin heavy variable 1-46	HV146_HUMAN	1	-15.7924	0.842076	Dengue	QC	NaN	NaN	NaN
Dengue / QC	P08697	P08697	-0.111776	0.111776	0.0319439	0.0180782	176	P08697	SERPINF2	Alpha-2-antiplasmin	A2AP_HUMAN	31	-7.45521	0.925448	Dengue	QC	NaN	NaN	NaN
Dengue / QC	P62258	P62258	0.704413	0.704413	0.0324744	0.0183029	66	P62258	YWHAE	14-3-3 protein epsilon	1433E_HUMAN	6	62.9481	1.62948	Dengue	QC	NaN	NaN	NaN
Dengue / QC	P02792	P02792	1.60246	1.60246	0.0345256	0.0193006	26	P02792	FTL	Ferritin light chain	FRIL_HUMAN	1	203.662	3.03662	Dengue	QC	NaN	NaN	NaN
Dengue / QC	A0A0B4J1R6;P29401;P29401-2	A0A0B4J1R6;P29401;P29401-2	2.63856	2.63856	0.0370992	0.0205166	64	A0A0B4J1R6;P29401;P29401-2	TKT	Transketolase;Transketolase;Isoform 2 of Transketolase	A0A0B4J1R6_HUMAN;TKT_HUMAN;TKT_HUMAN	9	522.711	6.22711	Dengue	QC	NaN	NaN	NaN
Dengue / QC	P19827	P19827	0.140394	0.140394	0.0375947	0.0207628	176	P19827	ITIH1	Inter-alpha-trypsin inhibitor heavy chain H1	ITIH1_HUMAN	53	10.2206	1.10221	Dengue	QC	NaN	NaN	NaN
Dengue / QC	G3V0E5;P02786	G3V0E5;P02786	-0.30848	0.30848	0.0385049	0.0211803	164	G3V0E5;P02786	TFRC	Transferrin receptor (P90, CD71), isoform CRA_c;Transferrin receptor protein 1	G3V0E5_HUMAN;TFR1_HUMAN	12	-19.2508	0.807492	Dengue	QC	NaN	NaN	NaN
Dengue / QC	P05109	P05109	-0.327316	0.327316	0.0408069	0.0221556	152	P05109	S100A8	Protein S100-A8	S10A8_HUMAN	4	-20.2982	0.797018	Dengue	QC	NaN	NaN	NaN
Dengue / QC	H0Y2P0;H0Y5E4;H0YCV9;H0YDW7;H0YDX6;P16070;P16070-10;P16070-11;P16070-12;P16070-13;P16070-14;P16070-15;P16070-16;P16070-17;P16070-18;P16070-3;P16070-4;P16070-5;P16070-6;P16070-7;P16070-8;P16070-9	H0Y2P0;H0Y5E4;H0YCV9;H0YDW7;H0YDX6;P16070;P16070-10;P16070-11;P16070-12;P16070-13;P16070-14;P16070-15;P16070-16;P16070-17;P16070-18;P16070-3;P16070-4;P16070-5;P16070-6;P16070-7;P16070-8;P16070-9	-0.0644157	0.0644157	0.0417096	0.022611	162	H0Y2P0;H0Y5E4;H0YCV9;H0YDW7;H0YDX6;P16070;P16070-10;P16070-11;P16070-12;P16070-13;P16070-14;P16070-15;P16070-16;P16070-17;P16070-18;P16070-3;P16070-4;P16070-5;P16070-6;P16070-7;P16070-8;P16070-9	CD44	CD44 antigen (Fragment);CD44 antigen (Fragment);CD44 antigen (Fragment);CD44 antigen (Fragment);CD44 antigen (Fragment);CD44 antigen;Isoform 10 of CD44 antigen;Isoform 11 of CD44 antigen;Isoform 12 of CD44 antigen;Isoform 13 of CD44 antigen;Isoform 14 of CD44 antigen;Isoform 15 of CD44 antigen;Isoform 16 of CD44 antigen;Isoform 17 of CD44 antigen;Isoform 18 of CD44 antigen;Isoform 3 of CD44 antig…	H0Y2P0_HUMAN;H0Y5E4_HUMAN;H0YCV9_HUMAN;H0YDW7_HUMAN;H0YDX6_HUMAN;CD44_HUMAN;CD44_HUMAN;CD44_HUMAN;CD44_HUMAN;CD44_HUMAN;CD44_HUMAN;CD44_HUMAN;CD44_HUMAN;CD44_HUMAN;CD44_HUMAN;CD44_HUMAN;CD44_HUMAN;CD44_HUMAN;CD44_HUMAN;CD44_HUMAN;CD44_HUMAN;CD44_HUMAN	4	-4.36674	0.956333	Dengue	QC	NaN	NaN	NaN
Dengue / QC	P43251;P43251-2;P43251-3;P43251-4	P43251;P43251-2;P43251-3;P43251-4	0.196113	0.196113	0.0424458	0.0229196	176	P43251;P43251-2;P43251-3;P43251-4	BTD	Biotinidase;Isoform 2 of Biotinidase;Isoform 3 of Biotinidase;Isoform 4 of Biotinidase	BTD_HUMAN	9	14.5607	1.14561	Dengue	QC	NaN	NaN	NaN
Dengue / QC	P01700	P01700	-0.202445	0.202445	0.0431802	0.0232248	176	P01700	IGLV1-47	Immunoglobulin lambda variable 1-47	LV147_HUMAN	2	-13.0924	0.869076	Dengue	QC	NaN	NaN	NaN
Dengue / QC	Q13790	Q13790	-0.170556	0.170556	0.0458576	0.0245368	134	Q13790	APOF	Apolipoprotein F	APOF_HUMAN	3	-11.15	0.8885	Dengue	QC	NaN	NaN	NaN
Dengue / QC	P01619	P01619	-0.20378	0.20378	0.0465925	0.0248499	176	P01619	IGKV3-20	Immunoglobulin kappa variable 3-20	KV320_HUMAN	6	-13.1727	0.868273	Dengue	QC	NaN	NaN	NaN
Dengue / QC	P01717	P01717	-0.217974	0.217974	0.0466238	0.0248499	162	P01717	IGLV3-25	Immunoglobulin lambda variable 3-25	LV325_HUMAN	2	-14.0228	0.859772	Dengue	QC	NaN	NaN	NaN
Dengue / QC	A0A024RA52;H3BT36;H7C402;P25787	A0A024RA52;H3BT36;H7C402;P25787	1.39067	1.39067	0.0466039	0.0248499	14	A0A024RA52;H3BT36;H7C402;P25787	PSMA2;;PSMA2;PSMA2	Proteasome subunit alpha type;Uncharacterized protein;Proteasome subunit alpha type-2 (Fragment);Proteasome subunit alpha type-2	A0A024RA52_HUMAN;H3BT36_HUMAN;H7C402_HUMAN;PSA2_HUMAN	1	162.201	2.62201	Dengue	QC	NaN	NaN	NaN
Dengue / QC	A0A0G2JS06	A0A0G2JS06	-0.155124	0.155124	0.0484067	0.0256674	168	A0A0G2JS06	IGLV5-39	Immunoglobulin lambda variable 5-39	LV539_HUMAN	5	-10.1945	0.898055	Dengue	QC	NaN	NaN	NaN
Dengue / QC	A0A0J9YXX1	A0A0J9YXX1	0.489412	0.489412	0.0494043	0.0260956	140	A0A0J9YXX1	IGHV5-10-1	Immunoglobulin heavy variable 5-10-1	HV5X1_HUMAN	3	40.3873	1.40387	Dengue	QC	NaN	NaN	NaN
Dengue / QC	P01042	P01042	-0.0570107	0.0570107	0.0510836	0.0269136	176	P01042	KNG1	Kininogen-1	KNG1_HUMAN	47	-3.87462	0.961254	Dengue	QC	NaN	NaN	NaN
Dengue / QC	P80748	P80748	-0.271519	0.271519	0.0522461	0.027386	168	P80748	IGLV3-21	Immunoglobulin lambda variable 3-21	LV321_HUMAN	3	-17.1553	0.828447	Dengue	QC	NaN	NaN	NaN
Dengue / QC	P20618	P20618	0.700384	0.700384	0.05269	0.0275467	32	P20618	PSMB1	Proteasome subunit beta type-1	PSB1_HUMAN	1	62.4937	1.62494	Dengue	QC	NaN	NaN	NaN
Dengue / QC	P10153	P10153	2.00217	2.00217	0.0541799	0.0282201	24	P10153	RNASE2	Non-secretory ribonuclease	RNAS2_HUMAN	2	300.603	4.00603	Dengue	QC	NaN	NaN	NaN
Dengue / QC	A0A087X0Q4	A0A087X0Q4	-0.145964	0.145964	0.0554264	0.0288329	176	A0A087X0Q4	IGKV2-40	Immunoglobulin kappa variable 2-40	A0A087X0Q4_HUMAN	7	-9.62248	0.903775	Dengue	QC	NaN	NaN	NaN
Dengue / QC	A0A075B7B8	A0A075B7B8	0.556368	0.556368	0.0584025	0.0302665	176	A0A075B7B8	IGHV3OR16-12	Immunoglobulin heavy variable 3/OR16-12 (non-functional) (Fragment)	A0A075B7B8_HUMAN	2	47.0563	1.47056	Dengue	QC	NaN	NaN	NaN
Dengue / QC	K7ERG9;P00746	K7ERG9;P00746	-0.066492	0.066492	0.0586316	0.030347	172	K7ERG9;P00746	CFD	Complement factor D	K7ERG9_HUMAN;CFAD_HUMAN	10	-4.50428	0.954957	Dengue	QC	NaN	NaN	NaN
Dengue / QC	P01042-2	P01042-2	-0.447803	0.447803	0.0600477	0.0310409	176	P01042-2	KNG1	Isoform LMW of Kininogen-1	KNG1_HUMAN	6	-26.6841	0.733159	Dengue	QC	NaN	NaN	NaN
Dengue / QC	P05534;P30447	P05534;P30447	0.103427	0.103427	0.061298	0.0316476	142	P05534;P30447	HLA-A	HLA class I histocompatibility antigen, A-24 alpha chain;HLA class I histocompatibility antigen, A-23 alpha chain	1A24_HUMAN;1A23_HUMAN	9	7.43228	1.07432	Dengue	QC	NaN	NaN	NaN
Dengue / QC	A0A0B4J1V2	A0A0B4J1V2	0.0239674	0.0239674	0.0621007	0.0320219	166	A0A0B4J1V2	IGHV2-26	Immunoglobulin heavy variable 2-26	HV226_HUMAN	8	1.67517	1.01675	Dengue	QC	NaN	NaN	NaN
Dengue / QC	P01601	P01601	0.531133	0.531133	0.06281	0.0323472	166	P01601	IGKV1D-16	Immunoglobulin kappa variable 1D-16 (Fragment)	KVD16_HUMAN	2	44.5063	1.44506	Dengue	QC	NaN	NaN	NaN
Dengue / QC	H0YAC1;P03952	H0YAC1;P03952	0.105798	0.105798	0.0673889	0.0344469	176	H0YAC1;P03952	KLKB1	Plasma kallikrein (Fragment);Plasma kallikrein	H0YAC1_HUMAN;KLKB1_HUMAN	38	7.60896	1.07609	Dengue	QC	NaN	NaN	NaN
Dengue / QC	G3V2W1;Q9UK55	G3V2W1;Q9UK55	-0.433243	0.433243	0.0678973	0.0346209	172	G3V2W1;Q9UK55	SERPINA10	Protein Z-dependent protease inhibitor	G3V2W1_HUMAN;ZPI_HUMAN	26	-25.9405	0.740595	Dengue	QC	NaN	NaN	NaN
Dengue / QC	A0A0G2JMI3	A0A0G2JMI3	0.499836	0.499836	0.0678662	0.0346209	148	A0A0G2JMI3	IGHV1-69-2	Immunoglobulin heavy variable 1-69-2	HV692_HUMAN	4	41.4052	1.41405	Dengue	QC	NaN	NaN	NaN
Dengue / QC	P20851;P20851-2	P20851;P20851-2	0.218669	0.218669	0.0698796	0.0355876	176	P20851;P20851-2	C4BPB	C4b-binding protein beta chain;Isoform 2 of C4b-binding protein beta chain	C4BPB_HUMAN	11	16.3659	1.16366	Dengue	QC	NaN	NaN	NaN
Dengue / QC	P01591	P01591	0.150082	0.150082	0.0704712	0.0358004	176	P01591	JCHAIN	Immunoglobulin J chain	IGJ_HUMAN	16	10.9632	1.10963	Dengue	QC	NaN	NaN	NaN
Dengue / QC	A0A075B6I1	A0A075B6I1	0.139746	0.139746	0.0704542	0.0358004	150	A0A075B6I1	IGLV4-60	Immunoglobulin lambda variable 4-60	LV460_HUMAN	4	10.1711	1.10171	Dengue	QC	NaN	NaN	NaN
Dengue / QC	A0A0B4J1V1	A0A0B4J1V1	0.0347135	0.0347135	0.0712747	0.0360967	20	A0A0B4J1V1	IGHV3-21	Immunoglobulin heavy variable 3-21	HV321_HUMAN	1	2.43534	1.02435	Dengue	QC	NaN	NaN	NaN
Dengue / QC	P06733	P06733	1.00053	1.00053	0.0715495	0.0361255	30	P06733	ENO1	Alpha-enolase	ENOA_HUMAN	15	100.073	2.00073	Dengue	QC	NaN	NaN	NaN
Dengue / QC	P01699	P01699	-0.127484	0.127484	0.0725477	0.0365847	176	P01699	IGLV1-44	Immunoglobulin lambda variable 1-44	LV144_HUMAN	3	-8.45737	0.915426	Dengue	QC	NaN	NaN	NaN
Dengue / QC	B4DPQ0	B4DPQ0	0.14754	0.14754	0.077898	0.0388547	176	B4DPQ0	C1R	Complement C1r subcomponent	B4DPQ0_HUMAN	54	10.7679	1.10768	Dengue	QC	NaN	NaN	NaN
Dengue / QC	J3KPS3;P04075;P04075-2	J3KPS3;P04075;P04075-2	1.11254	1.11254	0.0852109	0.0420946	62	J3KPS3;P04075;P04075-2	ALDOA	Fructose-bisphosphate aldolase;Fructose-bisphosphate aldolase A;Isoform 2 of Fructose-bisphosphate aldolase A	J3KPS3_HUMAN;ALDOA_HUMAN;ALDOA_HUMAN	8	116.226	2.16226	Dengue	QC	NaN	NaN	NaN
Dengue / QC	Q9Y5Y7	Q9Y5Y7	-0.42862	0.42862	0.0868675	0.0428103	112	Q9Y5Y7	LYVE1	Lymphatic vessel endothelial hyaluronic acid receptor 1	LYVE1_HUMAN	6	-25.7028	0.742972	Dengue	QC	NaN	NaN	NaN
Dengue / QC	P02760	P02760	-0.205699	0.205699	0.087379	0.0429596	176	P02760	AMBP	Protein AMBP	AMBP_HUMAN	31	-13.2881	0.867119	Dengue	QC	NaN	NaN	NaN
Dengue / QC	A0A0B4J1Y8	A0A0B4J1Y8	-0.0337332	0.0337332	0.0888693	0.0433817	142	A0A0B4J1Y8	IGLV9-49	Immunoglobulin lambda variable 9-49	LV949_HUMAN	7	-2.31108	0.976889	Dengue	QC	NaN	NaN	NaN
Dengue / QC	P01599	P01599	-0.239056	0.239056	0.0914342	0.0444232	174	P01599	IGKV1-17	Immunoglobulin kappa variable 1-17	KV117_HUMAN	2	-15.27	0.8473	Dengue	QC	NaN	NaN	NaN
Dengue / QC	E7ETH0;G3XAM2;P05156	E7ETH0;G3XAM2;P05156	0.11663	0.11663	0.0939084	0.0454111	176	E7ETH0;G3XAM2;P05156	CFI	Complement factor I	E7ETH0_HUMAN;G3XAM2_HUMAN;CFAI_HUMAN	29	8.41992	1.0842	Dengue	QC	NaN	NaN	NaN
Dengue / QC	Q5T7N2	Q5T7N2	-0.367084	0.367084	0.0942165	0.045455	176	Q5T7N2	L1TD1	LINE-1 type transposase domain-containing protein 1	LITD1_HUMAN	1	-22.4652	0.775348	Dengue	QC	NaN	NaN	NaN
Dengue / QC	P02751-14;P02751-8	P02751-14;P02751-8	0.253995	0.253995	0.0942198	0.045455	168	P02751-14;P02751-8	FN1	Isoform 14 of Fibronectin;Isoform 8 of Fibronectin	FINC_HUMAN	1	19.2504	1.1925	Dengue	QC	NaN	NaN	NaN
Dengue / QC	C9JF17;P05090	C9JF17;P05090	0.131718	0.131718	0.0945698	0.0455705	176	C9JF17;P05090	APOD	Apolipoprotein D (Fragment);Apolipoprotein D	C9JF17_HUMAN;APOD_HUMAN	14	9.55976	1.0956	Dengue	QC	NaN	NaN	NaN
Dengue / QC	P11597;P11597-2	P11597;P11597-2	0.27317	0.27317	0.0998818	0.0477625	80	P11597;P11597-2	CETP	Cholesteryl ester transfer protein;Isoform 2 of Cholesteryl ester transfer protein	CETP_HUMAN	4	20.846	1.20846	Dengue	QC	NaN	NaN	NaN
Dengue / QC	Q92820	Q92820	0.652216	0.652216	0.0999304	0.0477625	70	Q92820	GGH	Gamma-glutamyl hydrolase	GGH_HUMAN	6	57.158	1.57158	Dengue	QC	NaN	NaN	NaN
Dengue / QC	P19823	P19823	0.144431	0.144431	0.100648	0.0479357	176	P19823	ITIH2	Inter-alpha-trypsin inhibitor heavy chain H2	ITIH2_HUMAN	58	10.5294	1.10529	Dengue	QC	NaN	NaN	NaN
Dengue / QC	A0A0B4J1Y9	A0A0B4J1Y9	0.874252	0.874252	0.103669	0.0492069	176	A0A0B4J1Y9	IGHV3-72	Immunoglobulin heavy variable 3-72	HV372_HUMAN	11	83.3057	1.83306	Dengue	QC	NaN	NaN	NaN
Dengue / QC	A0A087WYK1;Q00887	A0A087WYK1;Q00887	-1.8156	1.8156	0.106149	0.0500953	20	A0A087WYK1;Q00887	PSG9	Pregnancy-specific beta-1-glycoprotein 9	A0A087WYK1_HUMAN;PSG9_HUMAN	3	-71.5913	0.284087	Dengue	QC	NaN	NaN	NaN
Dengue / QC	A0A087WSY5;Q96IY4	A0A087WSY5;Q96IY4	-0.132347	0.132347	0.109764	0.0512541	176	A0A087WSY5;Q96IY4	CPB2	Carboxypeptidase B2	A0A087WSY5_HUMAN;CBPB2_HUMAN	11	-8.76537	0.912346	Dengue	QC	NaN	NaN	NaN
Dengue / QC	P08311	P08311	0.196749	0.196749	0.109848	0.0512541	94	P08311	CTSG	Cathepsin G	CATG_HUMAN	7	14.6113	1.14611	Dengue	QC	NaN	NaN	NaN
Dengue / QC	P68363	P68363	-0.985116	0.985116	0.112817	0.0524328	24	P68363	TUBA1B	Tubulin alpha-1B chain	TBA1B_HUMAN	8	-49.4815	0.505185	Dengue	QC	NaN	NaN	NaN
Dengue / QC	P02775	P02775	-0.0947472	0.0947472	0.115547	0.0532497	176	P02775	PPBP	Platelet basic protein	CXCL7_HUMAN	7	-6.35637	0.936436	Dengue	QC	NaN	NaN	NaN
Dengue / QC	A0A140TA49	A0A140TA49	-0.0884718	0.0884718	0.115517	0.0532497	176	A0A140TA49	C4A	Complement C4-A	A0A140TA49_HUMAN	9	-5.94815	0.940518	Dengue	QC	NaN	NaN	NaN
Dengue / QC	A0A0C4DH73;P01611	A0A0C4DH73;P01611	1.30987	1.30987	0.115928	0.0533655	176	A0A0C4DH73;P01611	IGKV1-12;IGKV1D-12	Immunoglobulin kappa variable 1-12;Immunoglobulin kappa variable 1D-12	KV112_HUMAN;KVD12_HUMAN	2	147.919	2.47919	Dengue	QC	NaN	NaN	NaN
Dengue / QC	A0A0G2JMY9;Q8N6C8;Q8N6C8-3	A0A0G2JMY9;Q8N6C8;Q8N6C8-3	-0.417998	0.417998	0.116505	0.0534522	78	A0A0G2JMY9;Q8N6C8;Q8N6C8-3	LILRA3	Leukocyte immunoglobulin-like receptor subfamily A member 3;Leukocyte immunoglobulin-like receptor subfamily A member 3;Isoform 3 of Leukocyte immunoglobulin-like receptor subfamily A member 3	A0A0G2JMY9_HUMAN;LIRA3_HUMAN;LIRA3_HUMAN	6	-25.1538	0.748462	Dengue	QC	NaN	NaN	NaN
Dengue / QC	P15814	P15814	-0.448562	0.448562	0.120015	0.0548186	176	P15814	IGLL1	Immunoglobulin lambda-like polypeptide 1	IGLL1_HUMAN	4	-26.7227	0.732773	Dengue	QC	NaN	NaN	NaN
Dengue / QC	A0A0C4DH36	A0A0C4DH36	-0.0195485	0.0195485	0.120655	0.0550495	176	A0A0C4DH36	IGHV3-38	Immunoglobulin heavy variable 3-38 (non-functional) (Fragment)	A0A0C4DH36_HUMAN	4	-1.34586	0.986541	Dengue	QC	NaN	NaN	NaN
Dengue / QC	P00748	P00748	0.115635	0.115635	0.121146	0.0552125	176	P00748	F12	Coagulation factor XII	FA12_HUMAN	32	8.34516	1.08345	Dengue	QC	NaN	NaN	NaN
Dengue / QC	P35443	P35443	0.165325	0.165325	0.123487	0.0561055	170	P35443	THBS4	Thrombospondin-4	TSP4_HUMAN	13	12.1419	1.12142	Dengue	QC	NaN	NaN	NaN
Dengue / QC	P23381	P23381	0.223264	0.223264	0.124684	0.0565124	28	P23381	WARS	Tryptophan--tRNA ligase, cytoplasmic	SYWC_HUMAN	4	16.7372	1.16737	Dengue	QC	NaN	NaN	NaN
Dengue / QC	P18428	P18428	-0.221623	0.221623	0.125323	0.0566263	176	P18428	LBP	Lipopolysaccharide-binding protein	LBP_HUMAN	18	-14.24	0.8576	Dengue	QC	NaN	NaN	NaN
Dengue / QC	A0A0A0MRZ9	A0A0A0MRZ9	0.99808	0.99808	0.125111	0.0566263	30	A0A0A0MRZ9	IGLV5-52	Immunoglobulin lambda variable 5-52	LV552_HUMAN	2	99.7341	1.99734	Dengue	QC	NaN	NaN	NaN
Dengue / QC	P09960;P09960-2	P09960;P09960-2	1.40344	1.40344	0.125623	0.0566263	12	P09960;P09960-2	LTA4H	Leukotriene A-4 hydrolase;Isoform 2 of Leukotriene A-4 hydrolase	LKHA4_HUMAN	4	164.531	2.64531	Dengue	QC	NaN	NaN	NaN
Dengue / QC	E9PEK4;P07333	E9PEK4;P07333	0.933879	0.933879	0.125511	0.0566263	36	E9PEK4;P07333	CSF1R	Macrophage colony-stimulating factor 1 receptor	E9PEK4_HUMAN;CSF1R_HUMAN	8	91.0405	1.91041	Dengue	QC	NaN	NaN	NaN
Dengue / QC	A0A075B6J9	A0A075B6J9	-0.153649	0.153649	0.126948	0.0570365	176	A0A075B6J9	IGLV2-18	Immunoglobulin lambda variable 2-18	LV218_HUMAN	3	-10.1026	0.898974	Dengue	QC	NaN	NaN	NaN
Dengue / QC	A0A0C4DH30	A0A0C4DH30	0.249951	0.249951	0.127858	0.0573207	92	A0A0C4DH30	IGHV3-16	Immunoglobulin heavy variable 3-16 (non-functional) (Fragment)	A0A0C4DH30_HUMAN	1	18.9167	1.18917	Dengue	QC	NaN	NaN	NaN
Dengue / QC	P43652	P43652	-0.0146894	0.0146894	0.129576	0.0579645	176	P43652	AFM	Afamin	AFAM_HUMAN	59	-1.01302	0.98987	Dengue	QC	NaN	NaN	NaN
Dengue / QC	A0A087WTK0;A0A087WVC6;Q12913	A0A087WTK0;A0A087WVC6;Q12913	-0.704206	0.704206	0.130052	0.0581141	116	A0A087WTK0;A0A087WVC6;Q12913	PTPRJ	Receptor-type tyrosine-protein phosphatase eta	A0A087WTK0_HUMAN;A0A087WVC6_HUMAN;PTPRJ_HUMAN	7	-38.622	0.61378	Dengue	QC	NaN	NaN	NaN
Dengue / QC	E7END6;P04070;P04070-2	E7END6;P04070;P04070-2	0.116835	0.116835	0.133949	0.0597262	166	E7END6;P04070;P04070-2	PROC	Vitamin K-dependent protein C;Vitamin K-dependent protein C;Isoform 2 of Vitamin K-dependent protein C	E7END6_HUMAN;PROC_HUMAN;PROC_HUMAN	11	8.43534	1.08435	Dengue	QC	NaN	NaN	NaN
Dengue / QC	P07737	P07737	0.216807	0.216807	0.134303	0.0598192	126	P07737	PFN1	Profilin-1	PROF1_HUMAN	10	16.2158	1.16216	Dengue	QC	NaN	NaN	NaN
Dengue / QC	Q5VZR0;Q9H4G4	Q5VZR0;Q9H4G4	1.49088	1.49088	0.135611	0.0602424	38	Q5VZR0;Q9H4G4	GLIPR2	Golgi-associated plant pathogenesis-related protein 1	Q5VZR0_HUMAN;GAPR1_HUMAN	3	181.06	2.8106	Dengue	QC	NaN	NaN	NaN
Dengue / QC	E7ENL6;P12111;P12111-2;P12111-4	E7ENL6;P12111;P12111-2;P12111-4	1.26283	1.26283	0.139627	0.0617236	56	E7ENL6;P12111;P12111-2;P12111-4	COL6A3	Collagen alpha-3(VI) chain;Collagen alpha-3(VI) chain;Isoform 2 of Collagen alpha-3(VI) chain;Isoform 4 of Collagen alpha-3(VI) chain	E7ENL6_HUMAN;CO6A3_HUMAN;CO6A3_HUMAN;CO6A3_HUMAN	22	139.965	2.39965	Dengue	QC	NaN	NaN	NaN
Dengue / QC	K7EL47;K7EQZ5;Q16853;Q16853-3	K7EL47;K7EQZ5;Q16853;Q16853-3	0.25995	0.25995	0.15075	0.0656598	56	K7EL47;K7EQZ5;Q16853;Q16853-3	AOC3	Amine oxidase (Fragment);Amine oxidase (Fragment);Membrane primary amine oxidase;Isoform 3 of Membrane primary amine oxidase	K7EL47_HUMAN;K7EQZ5_HUMAN;AOC3_HUMAN;AOC3_HUMAN	1	19.7437	1.19744	Dengue	QC	NaN	NaN	NaN
Dengue / QC	P01009	P01009	-0.13768	0.13768	0.154284	0.0669104	176	P01009	SERPINA1	Alpha-1-antitrypsin	A1AT_HUMAN	55	-9.102	0.90898	Dengue	QC	NaN	NaN	NaN
Dengue / QC	P69891;P69892	P69891;P69892	0.525356	0.525356	0.156026	0.0674532	110	P69891;P69892	HBG1;HBG2	Hemoglobin subunit gamma-1;Hemoglobin subunit gamma-2	HBG1_HUMAN;HBG2_HUMAN	3	43.9289	1.43929	Dengue	QC	NaN	NaN	NaN
Dengue / QC	Q15485	Q15485	0.00680482	0.00680482	0.157905	0.0680513	142	Q15485	FCN2	Ficolin-2	FCN2_HUMAN	10	0.472788	1.00473	Dengue	QC	NaN	NaN	NaN
Dengue / QC	P27797	P27797	1.01946	1.01946	0.157692	0.0680513	26	P27797	CALR	Calreticulin	CALR_HUMAN	3	102.716	2.02716	Dengue	QC	NaN	NaN	NaN
Dengue / QC	A0A087WSX0	A0A087WSX0	-0.142278	0.142278	0.163387	0.0701935	132	A0A087WSX0	IGLV5-45	Immunoglobulin lambda variable 5-45	LV545_HUMAN	1	-9.39125	0.906088	Dengue	QC	NaN	NaN	NaN
Dengue / QC	P61626	P61626	-0.154505	0.154505	0.167072	0.0715525	172	P61626	LYZ	Lysozyme C	LYSC_HUMAN	11	-10.156	0.89844	Dengue	QC	NaN	NaN	NaN
Dengue / QC	P10809	P10809	-0.344073	0.344073	0.168788	0.072063	50	P10809	HSPD1	60 kDa heat shock protein, mitochondrial	CH60_HUMAN	4	-21.2186	0.787814	Dengue	QC	NaN	NaN	NaN
Dengue / QC	A0A0A0MT69	A0A0A0MT69	0.132234	0.132234	0.169295	0.0722045	170	A0A0A0MT69	IGKJ4	Immunoglobulin kappa joining 4 (Fragment)	A0A0A0MT69_HUMAN	1	9.59892	1.09599	Dengue	QC	NaN	NaN	NaN
Dengue / QC	P00738	P00738	-0.0643745	0.0643745	0.17381	0.0739006	176	P00738	HP	Haptoglobin	HPT_HUMAN	56	-4.36401	0.95636	Dengue	QC	NaN	NaN	NaN
Dengue / QC	P41222	P41222	-0.111118	0.111118	0.174034	0.0739197	140	P41222	PTGDS	Prostaglandin-H2 D-isomerase	PTGDS_HUMAN	5	-7.41299	0.92587	Dengue	QC	NaN	NaN	NaN
Dengue / QC	C9JB55	C9JB55	-0.0292886	0.0292886	0.176717	0.0749047	166	C9JB55	TF	Serotransferrin (Fragment)	C9JB55_HUMAN	2	-2.00966	0.979903	Dengue	QC	NaN	NaN	NaN
Dengue / QC	A0A087WTE4;A0A087WTF6;A0A087WV75;A0A087WWD4;A0A087WX77;H7BYX6;P13591;P13591-1;P13591-3;P13591-4	A0A087WTE4;A0A087WTF6;A0A087WV75;A0A087WWD4;A0A087WX77;H7BYX6;P13591;P13591-1;P13591-3;P13591-4	0.31705	0.31705	0.180871	0.0761953	54	A0A087WTE4;A0A087WTF6;A0A087WV75;A0A087WWD4;A0A087WX77;H7BYX6;P13591;P13591-1;P13591-3;P13591-4	NCAM1	Neural cell adhesion molecule 1;Neural cell adhesion molecule 1;Neural cell adhesion molecule 1;Neural cell adhesion molecule 1;Neural cell adhesion molecule 1;Neural cell adhesion molecule 1;Neural cell adhesion molecule 1;Isoform 2 of Neural cell adhesion molecule 1;Isoform 3 of Neural cell adhesion molecule 1;Isoform 4 of Neural cell adhesion molecule 1	A0A087WTE4_HUMAN;A0A087WTF6_HUMAN;A0A087WV75_HUMAN;A0A087WWD4_HUMAN;A0A087WX77_HUMAN;H7BYX6_HUMAN;NCAM1_HUMAN;NCAM1_HUMAN;NCAM1_HUMAN;NCAM1_HUMAN	13	24.578	1.24578	Dengue	QC	NaN	NaN	NaN
Dengue / QC	P02787	P02787	-0.0757264	0.0757264	0.181393	0.0763372	176	P02787	TF	Serotransferrin	TRFE_HUMAN	116	-5.11358	0.948864	Dengue	QC	NaN	NaN	NaN
Dengue / QC	P23141;P23141-2;P23141-3	P23141;P23141-2;P23141-3	1.87731	1.87731	0.181712	0.0763749	34	P23141;P23141-2;P23141-3	CES1	Liver carboxylesterase 1;Isoform 2 of Liver carboxylesterase 1;Isoform 3 of Liver carboxylesterase 1	EST1_HUMAN	4	267.389	3.67389	Dengue	QC	NaN	NaN	NaN
Dengue / QC	D6R934;P02746	D6R934;P02746	0.09482	0.09482	0.184002	0.0771163	176	D6R934;P02746	C1QB	Complement C1q subcomponent subunit B	D6R934_HUMAN;C1QB_HUMAN	13	6.79321	1.06793	Dengue	QC	NaN	NaN	NaN
Dengue / QC	A0A075B6K0	A0A075B6K0	0.386743	0.386743	0.188427	0.0784955	120	A0A075B6K0	IGLV3-16	Immunoglobulin lambda variable 3-16	LV316_HUMAN	2	30.7439	1.30744	Dengue	QC	NaN	NaN	NaN
Dengue / QC	A0A0B4J269;G3V2A3;P07437;P68371;Q13509;Q13509-2;Q5JP53;Q5ST81	A0A0B4J269;G3V2A3;P07437;P68371;Q13509;Q13509-2;Q5JP53;Q5ST81	2.14409	2.14409	0.189247	0.0787575	16	A0A0B4J269;G3V2A3;P07437;P68371;Q13509;Q13509-2;Q5JP53;Q5ST81	;TUBB3;TUBB;TUBB4B;TUBB3;TUBB3;TUBB;TUBB	Uncharacterized protein;Tubulin beta chain (Fragment);Tubulin beta chain;Tubulin beta-4B chain;Tubulin beta-3 chain;Isoform 2 of Tubulin beta-3 chain;Tubulin beta chain;Tubulin beta chain	A0A0B4J269_HUMAN;G3V2A3_HUMAN;TBB5_HUMAN;TBB4B_HUMAN;TBB3_HUMAN;TBB3_HUMAN;Q5JP53_HUMAN;Q5ST81_HUMAN	3	342.013	4.42013	Dengue	QC	NaN	NaN	NaN
Dengue / QC	A0A0C4DH68	A0A0C4DH68	-0.0637026	0.0637026	0.190019	0.078947	176	A0A0C4DH68	IGKV2-24	Immunoglobulin kappa variable 2-24	KV224_HUMAN	8	-4.31946	0.956805	Dengue	QC	NaN	NaN	NaN
Dengue / QC	P02747	P02747	-0.0958444	0.0958444	0.195879	0.0808638	176	P02747	C1QC	Complement C1q subcomponent subunit C	C1QC_HUMAN	10	-6.42756	0.935724	Dengue	QC	NaN	NaN	NaN
Dengue / QC	I3L145;P04278	I3L145;P04278	0.26817	0.26817	0.201808	0.0830619	176	I3L145;P04278	SHBG	Sex hormone-binding globulin	I3L145_HUMAN;SHBG_HUMAN	23	20.4279	1.20428	Dengue	QC	NaN	NaN	NaN
Dengue / QC	G3XAK1;P26927	G3XAK1;P26927	0.155242	0.155242	0.208965	0.0857504	174	G3XAK1;P26927	MST1	Hepatocyte growth factor-like protein	G3XAK1_HUMAN;HGFL_HUMAN	34	11.3608	1.11361	Dengue	QC	NaN	NaN	NaN
Dengue / QC	A0A075B6I4;A0A1W2PQ80	A0A075B6I4;A0A1W2PQ80	-0.20822	0.20822	0.209554	0.0858838	138	A0A075B6I4;A0A1W2PQ80	IGLV10-54	Immunoglobulin lambda variable 10-54	LVX54_HUMAN;A0A1W2PQ80_HUMAN	1	-13.4396	0.865604	Dengue	QC	NaN	NaN	NaN
Dengue / QC	A0A0C4DH31	A0A0C4DH31	0.08733	0.08733	0.210218	0.0859225	176	A0A0C4DH31	IGHV1-18	Immunoglobulin heavy variable 1-18	HV118_HUMAN	4	6.24021	1.0624	Dengue	QC	NaN	NaN	NaN
Dengue / QC	P11021	P11021	0.199856	0.199856	0.210446	0.0859304	98	P11021	HSPA5	78 kDa glucose-regulated protein	GRP78_HUMAN	17	14.8584	1.14858	Dengue	QC	NaN	NaN	NaN
Dengue / QC	P27918	P27918	0.121945	0.121945	0.211274	0.0860978	176	P27918	CFP	Properdin	PROP_HUMAN	16	8.82011	1.0882	Dengue	QC	NaN	NaN	NaN
Dengue / QC	P35858;P35858-2	P35858;P35858-2	0.0950777	0.0950777	0.212455	0.0864936	172	P35858;P35858-2	IGFALS	Insulin-like growth factor-binding protein complex acid labile subunit;Isoform 2 of Insulin-like growth factor-binding protein complex acid labile subunit	ALS_HUMAN	28	6.81229	1.06812	Dengue	QC	NaN	NaN	NaN
Dengue / QC	P01876	P01876	-0.142149	0.142149	0.220715	0.0894147	176	P01876	IGHA1	Immunoglobulin heavy constant alpha 1	IGHA1_HUMAN	11	-9.38318	0.906168	Dengue	QC	NaN	NaN	NaN
Dengue / QC	P01721	P01721	0.10863	0.10863	0.224261	0.090495	134	P01721	IGLV6-57	Immunoglobulin lambda variable 6-57	LV657_HUMAN	2	7.82039	1.0782	Dengue	QC	NaN	NaN	NaN
Dengue / QC	P0C0L5	P0C0L5	-0.207457	0.207457	0.224838	0.0906393	176	P0C0L5	C4B	Complement C4-B	CO4B_HUMAN	170	-13.3938	0.866062	Dengue	QC	NaN	NaN	NaN
Dengue / QC	P00367	P00367	1.3305	1.3305	0.231275	0.0929612	22	P00367	GLUD1	Glutamate dehydrogenase 1, mitochondrial	DHE3_HUMAN	2	151.49	2.5149	Dengue	QC	NaN	NaN	NaN
Dengue / QC	O00391	O00391	-0.208064	0.208064	0.236977	0.0946071	176	O00391	QSOX1	Sulfhydryl oxidase 1	QSOX1_HUMAN	24	-13.4302	0.865698	Dengue	QC	NaN	NaN	NaN
Dengue / QC	P01033;Q5H9A7	P01033;Q5H9A7	0.254148	0.254148	0.244899	0.0971111	76	P01033;Q5H9A7	TIMP1	Metalloproteinase inhibitor 1	TIMP1_HUMAN;Q5H9A7_HUMAN	3	19.2631	1.19263	Dengue	QC	NaN	NaN	NaN
Dengue / QC	P01024	P01024	-0.055889	0.055889	0.245301	0.097177	176	P01024	C3	Complement C3	CO3_HUMAN	233	-3.79985	0.962001	Dengue	QC	NaN	NaN	NaN
Dengue / QC	P02647	P02647	0.0991465	0.0991465	0.249109	0.0984016	176	P02647	APOA1	Apolipoprotein A-I	APOA1_HUMAN	52	7.11396	1.07114	Dengue	QC	NaN	NaN	NaN
Dengue / QC	P01706	P01706	0.0420554	0.0420554	0.25451	0.100151	176	P01706	IGLV2-11	Immunoglobulin lambda variable 2-11	LV211_HUMAN	6	2.95796	1.02958	Dengue	QC	NaN	NaN	NaN
Dengue / QC	P80723;P80723-2	P80723;P80723-2	1.40149	1.40149	0.254782	0.100162	28	P80723;P80723-2	BASP1	Brain acid soluble protein 1;Isoform 2 of Brain acid soluble protein 1	BASP1_HUMAN	4	164.174	2.64174	Dengue	QC	NaN	NaN	NaN
Dengue / QC	A0A0B4J2B5	A0A0B4J2B5	-0.124302	0.124302	0.257561	0.100966	176	A0A0B4J2B5	IGHV3OR16-9	Immunoglobulin heavy variable 3/OR16-9 (non-functional) (Fragment)	A0A0B4J2B5_HUMAN	1	-8.2552	0.917448	Dengue	QC	NaN	NaN	NaN
Dengue / QC	A0A0B4J1U3	A0A0B4J1U3	-0.284934	0.284934	0.260569	0.101854	168	A0A0B4J1U3	IGLV1-36	Immunoglobulin lambda variable 1-36	LV136_HUMAN	3	-17.9221	0.820779	Dengue	QC	NaN	NaN	NaN
Dengue / QC	J3KRP0	J3KRP0	-0.259799	0.259799	0.265376	0.103049	76	J3KRP0	CNDP1	Beta-Ala-His dipeptidase	J3KRP0_HUMAN	1	-16.4796	0.835204	Dengue	QC	NaN	NaN	NaN
Dengue / QC	B7ZKJ8	B7ZKJ8	0.091176	0.091176	0.266353	0.103234	76	B7ZKJ8	ITIH4	ITIH4 protein	B7ZKJ8_HUMAN	1	6.52382	1.06524	Dengue	QC	NaN	NaN	NaN
Dengue / QC	A0A087WYS1;E7EUC7;Q16851;Q16851-2	A0A087WYS1;E7EUC7;Q16851;Q16851-2	0.995946	0.995946	0.26956	0.104183	42	A0A087WYS1;E7EUC7;Q16851;Q16851-2	UGP2	UTP--glucose-1-phosphate uridylyltransferase;UTP--glucose-1-phosphate uridylyltransferase;UTP--glucose-1-phosphate uridylyltransferase;Isoform 2 of UTP--glucose-1-phosphate uridylyltransferase	A0A087WYS1_HUMAN;E7EUC7_HUMAN;UGPA_HUMAN;UGPA_HUMAN	3	99.4388	1.99439	Dengue	QC	NaN	NaN	NaN
Dengue / QC	A0A0B4J1X5	A0A0B4J1X5	-0.0576315	0.0576315	0.27628	0.10668	176	A0A0B4J1X5	IGHV3-74	Immunoglobulin heavy variable 3-74	HV374_HUMAN	7	-3.91598	0.96084	Dengue	QC	NaN	NaN	NaN
Dengue / QC	A0A0J9YX35	A0A0J9YX35	-0.124368	0.124368	0.276998	0.106857	176	A0A0J9YX35	IGHV3-64D	Immunoglobulin heavy variable 3-64D	HV64D_HUMAN	3	-8.25939	0.917406	Dengue	QC	NaN	NaN	NaN
Dengue / QC	P00747	P00747	0.0747724	0.0747724	0.283868	0.109405	176	P00747	PLG	Plasminogen	PLMN_HUMAN	90	5.31949	1.05319	Dengue	QC	NaN	NaN	NaN
Dengue / QC	Q93088	Q93088	2.4422	2.4422	0.287962	0.110775	36	Q93088	BHMT	Betaine--homocysteine S-methyltransferase 1	BHMT1_HUMAN	1	443.469	5.43469	Dengue	QC	NaN	NaN	NaN
Dengue / QC	P04275	P04275	-0.12206	0.12206	0.296407	0.113379	172	P04275	VWF	von Willebrand factor	VWF_HUMAN	110	-8.11251	0.918875	Dengue	QC	NaN	NaN	NaN
Dengue / QC	A0A1W2PP64	A0A1W2PP64	-0.242054	0.242054	0.29673	0.113379	174	A0A1W2PP64	NaN	Uncharacterized protein	A0A1W2PP64_HUMAN	1	-15.4459	0.845541	Dengue	QC	NaN	NaN	NaN
Dengue / QC	A0A0C4DH42;P01767	A0A0C4DH42;P01767	0.22525	0.22525	0.296933	0.113379	94	A0A0C4DH42;P01767	IGHV3-66;IGHV3-53	Immunoglobulin heavy variable 3-66;Immunoglobulin heavy variable 3-53	HV366_HUMAN;HV353_HUMAN	1	16.898	1.16898	Dengue	QC	NaN	NaN	NaN
Dengue / QC	P25311	P25311	0.0684459	0.0684459	0.298383	0.113828	176	P25311	AZGP1	Zinc-alpha-2-glycoprotein	ZA2G_HUMAN	30	4.85865	1.04859	Dengue	QC	NaN	NaN	NaN
Dengue / QC	P00740	P00740	-0.151872	0.151872	0.300243	0.11422	176	P00740	F9	Coagulation factor IX	FA9_HUMAN	18	-9.99182	0.900082	Dengue	QC	NaN	NaN	NaN
Dengue / QC	P13671	P13671	0.0592334	0.0592334	0.308263	0.116625	176	P13671	C6	Complement component C6	CO6_HUMAN	63	4.1912	1.04191	Dengue	QC	NaN	NaN	NaN
Dengue / QC	A0A075B6I0	A0A075B6I0	0.12085	0.12085	0.315566	0.118517	176	A0A075B6I0	IGLV8-61	Immunoglobulin lambda variable 8-61	LV861_HUMAN	4	8.73752	1.08738	Dengue	QC	NaN	NaN	NaN
Dengue / QC	P08571	P08571	-0.0897501	0.0897501	0.313863	0.118517	174	P08571	CD14	Monocyte differentiation antigen CD14	CD14_HUMAN	10	-6.03145	0.939686	Dengue	QC	NaN	NaN	NaN
Dengue / QC	P00441	P00441	0.538172	0.538172	0.314493	0.118517	46	P00441	SOD1	Superoxide dismutase [Cu-Zn]	SODC_HUMAN	5	45.2131	1.45213	Dengue	QC	NaN	NaN	NaN
Dengue / QC	P01031	P01031	0.0446186	0.0446186	0.318065	0.119347	176	P01031	C5	Complement C5	CO5_HUMAN	116	3.14105	1.03141	Dengue	QC	NaN	NaN	NaN
Dengue / QC	P14625	P14625	-0.157526	0.157526	0.319503	0.119777	86	P14625	HSP90B1	Endoplasmin	ENPL_HUMAN	9	-10.3439	0.896561	Dengue	QC	NaN	NaN	NaN
Dengue / QC	P07360	P07360	-0.00468622	0.00468622	0.321908	0.12046	176	P07360	C8G	Complement component C8 gamma chain	CO8G_HUMAN	13	-0.324297	0.996757	Dengue	QC	NaN	NaN	NaN
Dengue / QC	F5GYZ5;F5H3C5;F5H4R2;P04179;P04179-3;P04179-4	F5GYZ5;F5H3C5;F5H4R2;P04179;P04179-3;P04179-4	2.26027	2.26027	0.323499	0.120726	14	F5GYZ5;F5H3C5;F5H4R2;P04179;P04179-3;P04179-4	SOD2	Superoxide dismutase (Fragment);Superoxide dismutase (Fragment);Superoxide dismutase (Fragment);Superoxide dismutase [Mn], mitochondrial;Isoform 3 of Superoxide dismutase [Mn], mitochondrial;Isoform 4 of Superoxide dismutase [Mn], mitochondrial	F5GYZ5_HUMAN;F5H3C5_HUMAN;F5H4R2_HUMAN;SODM_HUMAN;SODM_HUMAN;SODM_HUMAN	1	379.08	4.7908	Dengue	QC	NaN	NaN	NaN
Dengue / QC	A0A0B4J1V0	A0A0B4J1V0	-0.140714	0.140714	0.326364	0.121685	172	A0A0B4J1V0	IGHV3-15	Immunoglobulin heavy variable 3-15	HV315_HUMAN	10	-9.29301	0.90707	Dengue	QC	NaN	NaN	NaN
Dengue / QC	P08603	P08603	0.0561567	0.0561567	0.32731	0.121927	176	P08603	CFH	Complement factor H	CFAH_HUMAN	118	3.96924	1.03969	Dengue	QC	NaN	NaN	NaN
Dengue / QC	P36955	P36955	-0.0689745	0.0689745	0.334095	0.123672	176	P36955	SERPINF1	Pigment epithelium-derived factor	PEDF_HUMAN	34	-4.66846	0.953315	Dengue	QC	NaN	NaN	NaN
Dengue / QC	Q68DL7	Q68DL7	-0.0683271	0.0683271	0.34165	0.126129	168	Q68DL7	C18orf63	Uncharacterized protein C18orf63	CR063_HUMAN	1	-4.62567	0.953743	Dengue	QC	NaN	NaN	NaN
Dengue / QC	P07998	P07998	0.650862	0.650862	0.345068	0.127277	88	P07998	RNASE1	Ribonuclease pancreatic	RNAS1_HUMAN	3	57.0106	1.57011	Dengue	QC	NaN	NaN	NaN
Dengue / QC	P62937	P62937	-0.108039	0.108039	0.346408	0.127657	114	P62937	PPIA	Peptidyl-prolyl cis-trans isomerase A	PPIA_HUMAN	10	-7.21518	0.927848	Dengue	QC	NaN	NaN	NaN
Dengue / QC	A0A096LPE2	A0A096LPE2	0.0125128	0.0125128	0.350033	0.128647	176	A0A096LPE2	SAA2-SAA4	SAA2-SAA4 readthrough	A0A096LPE2_HUMAN	10	0.87109	1.00871	Dengue	QC	NaN	NaN	NaN
Dengue / QC	P06702	P06702	0.496217	0.496217	0.356873	0.130579	112	P06702	S100A9	Protein S100-A9	S10A9_HUMAN	9	41.051	1.41051	Dengue	QC	NaN	NaN	NaN
Dengue / QC	H0Y512;Q9HDC9	H0Y512;Q9HDC9	0.141338	0.141338	0.375117	0.136286	142	H0Y512;Q9HDC9	APMAP	Adipocyte plasma membrane-associated protein (Fragment);Adipocyte plasma membrane-associated protein	H0Y512_HUMAN;APMAP_HUMAN	13	10.2928	1.10293	Dengue	QC	NaN	NaN	NaN
Dengue / QC	P35527	P35527	-0.953937	0.953937	0.385113	0.139671	16	P35527	KRT9	Keratin, type I cytoskeletal 9	K1C9_HUMAN	10	-48.3778	0.516222	Dengue	QC	NaN	NaN	NaN
Dengue / QC	Q5VVK9;Q5VVL2;Q9NUP7;Q9NUP7-2	Q5VVK9;Q5VVL2;Q9NUP7;Q9NUP7-2	0.534552	0.534552	0.389569	0.140792	32	Q5VVK9;Q5VVL2;Q9NUP7;Q9NUP7-2	TRMT13	tRNA:m(4)X modification enzyme TRM13 homolog;tRNA:m(4)X modification enzyme TRM13 homolog;tRNA:m(4)X modification enzyme TRM13 homolog;Isoform 2 of tRNA:m(4)X modification enzyme TRM13 homolog	Q5VVK9_HUMAN;Q5VVL2_HUMAN;TRM13_HUMAN;TRM13_HUMAN	1	44.8492	1.44849	Dengue	QC	NaN	NaN	NaN
Dengue / QC	P0DJI9	P0DJI9	-0.148722	0.148722	0.392825	0.141596	138	P0DJI9	SAA2	Serum amyloid A-2 protein	SAA2_HUMAN	8	-9.79508	0.902049	Dengue	QC	NaN	NaN	NaN
Dengue / QC	P01709	P01709	-0.0840498	0.0840498	0.398222	0.142792	174	P01709	IGLV2-8	Immunoglobulin lambda variable 2-8	LV208_HUMAN	2	-5.65943	0.943406	Dengue	QC	NaN	NaN	NaN
Dengue / QC	A0A087X0I0;A0A140T8Y3;A0A140T8Z8;A0A140T9C0;A0A140T9L7;A0A140TA41;A0A140TA52;P22105;P22105-3;P22105-4	A0A087X0I0;A0A140T8Y3;A0A140T8Z8;A0A140T9C0;A0A140T9L7;A0A140TA41;A0A140TA52;P22105;P22105-3;P22105-4	-0.140897	0.140897	0.397559	0.142792	126	A0A087X0I0;A0A140T8Y3;A0A140T8Z8;A0A140T9C0;A0A140T9L7;A0A140TA41;A0A140TA52;P22105;P22105-3;P22105-4	TNXB	Tenascin-X;Tenascin-X;Tenascin-X (Fragment);Tenascin-X;Tenascin-X (Fragment);Tenascin-X;Tenascin-X;Tenascin-X;Isoform 4 of Tenascin-X;Isoform 5 of Tenascin-X	A0A087X0I0_HUMAN;A0A140T8Y3_HUMAN;A0A140T8Z8_HUMAN;A0A140T9C0_HUMAN;A0A140T9L7_HUMAN;A0A140TA41_HUMAN;A0A140TA52_HUMAN;TENX_HUMAN;TENX_HUMAN;TENX_HUMAN	18	-9.30447	0.906955	Dengue	QC	NaN	NaN	NaN
Dengue / QC	P01860	P01860	0.151525	0.151525	0.408621	0.146012	176	P01860	IGHG3	Immunoglobulin heavy constant gamma 3	IGHG3_HUMAN	25	11.0743	1.11074	Dengue	QC	NaN	NaN	NaN
Dengue / QC	A0A087X1J7;P22352	A0A087X1J7;P22352	0.192314	0.192314	0.411559	0.146934	176	A0A087X1J7;P22352	GPX3	Glutathione peroxidase;Glutathione peroxidase 3	A0A087X1J7_HUMAN;GPX3_HUMAN	9	14.2595	1.14259	Dengue	QC	NaN	NaN	NaN
Dengue / QC	P33151	P33151	0.13146	0.13146	0.414219	0.147628	172	P33151	CDH5	Cadherin-5	CADH5_HUMAN	16	9.54017	1.0954	Dengue	QC	NaN	NaN	NaN
Dengue / QC	A0A024R6I7	A0A024R6I7	0.155314	0.155314	0.423792	0.150519	114	A0A024R6I7	SERPINA1	Alpha-1-antitrypsin	A0A024R6I7_HUMAN	3	11.3664	1.11366	Dengue	QC	NaN	NaN	NaN
Dengue / QC	F8WF14;P06276	F8WF14;P06276	0.0626775	0.0626775	0.431589	0.153025	170	F8WF14;P06276	BCHE	Carboxylic ester hydrolase;Cholinesterase	F8WF14_HUMAN;CHLE_HUMAN	8	4.44022	1.0444	Dengue	QC	NaN	NaN	NaN
Dengue / QC	P0DP01	P0DP01	-0.24312	0.24312	0.433787	0.153408	28	P0DP01	IGHV1-8	Immunoglobulin heavy variable 1-8	HV108_HUMAN	2	-15.5084	0.844916	Dengue	QC	NaN	NaN	NaN
Dengue / QC	Q6EMK4	Q6EMK4	0.0851906	0.0851906	0.436083	0.153824	154	Q6EMK4	VASN	Vasorin	VASN_HUMAN	10	6.08279	1.06083	Dengue	QC	NaN	NaN	NaN
Dengue / QC	P27169	P27169	0.131394	0.131394	0.443047	0.15588	176	P27169	PON1	Serum paraoxonase/arylesterase 1	PON1_HUMAN	20	9.53516	1.09535	Dengue	QC	NaN	NaN	NaN
Dengue / QC	A0A075B7D0	A0A075B7D0	0.0919466	0.0919466	0.448597	0.157564	176	A0A075B7D0	IGHV1OR15-1	Immunoglobulin heavy variable 1/OR15-1 (non-functional) (Fragment)	A0A075B7D0_HUMAN	3	6.58073	1.06581	Dengue	QC	NaN	NaN	NaN
Dengue / QC	Q9UHG3	Q9UHG3	0.422187	0.422187	0.452645	0.15858	84	Q9UHG3	PCYOX1	Prenylcysteine oxidase 1	PCYOX_HUMAN	7	33.9957	1.33996	Dengue	QC	NaN	NaN	NaN
Dengue / QC	P04264	P04264	-1.94339	1.94339	0.463018	0.161801	34	P04264	KRT1	Keratin, type II cytoskeletal 1	K2C1_HUMAN	19	-73.9995	0.260005	Dengue	QC	NaN	NaN	NaN
Dengue / QC	Q9BUN1	Q9BUN1	0.0930388	0.0930388	0.470031	0.163696	40	Q9BUN1	MENT	Protein MENT	MENT_HUMAN	3	6.66145	1.06661	Dengue	QC	NaN	NaN	NaN
Dengue / QC	P05062	P05062	0.575196	0.575196	0.484513	0.167888	52	P05062	ALDOB	Fructose-bisphosphate aldolase B	ALDOB_HUMAN	11	48.988	1.48988	Dengue	QC	NaN	NaN	NaN
Dengue / QC	P08185	P08185	0.131093	0.131093	0.488527	0.168853	174	P08185	SERPINA6	Corticosteroid-binding globulin	CBG_HUMAN	15	9.51228	1.09512	Dengue	QC	NaN	NaN	NaN
Dengue / QC	A0A0C4DH29	A0A0C4DH29	0.153664	0.153664	0.492163	0.169683	150	A0A0C4DH29	IGHV1-3	Immunoglobulin heavy variable 1-3	HV103_HUMAN	3	11.2391	1.11239	Dengue	QC	NaN	NaN	NaN
Dengue / QC	A0A0C4DH39	A0A0C4DH39	0.0395298	0.0395298	0.495458	0.170508	130	A0A0C4DH39	IGHV1-58	Immunoglobulin heavy variable 1-58	HV158_HUMAN	1	2.77788	1.02778	Dengue	QC	NaN	NaN	NaN
Dengue / QC	J3QQR8;J3QQX6;J3QRQ1;P13598	J3QQR8;J3QQX6;J3QRQ1;P13598	0.316537	0.316537	0.510146	0.174876	108	J3QQR8;J3QQX6;J3QRQ1;P13598	ICAM2	Intercellular adhesion molecule 2 (Fragment);Intercellular adhesion molecule 2 (Fragment);Intercellular adhesion molecule 2 (Fragment);Intercellular adhesion molecule 2	J3QQR8_HUMAN;J3QQX6_HUMAN;J3QRQ1_HUMAN;ICAM2_HUMAN	4	24.5338	1.24534	Dengue	QC	NaN	NaN	NaN
Dengue / QC	O43866	O43866	-0.183072	0.183072	0.512027	0.175358	176	O43866	CD5L	CD5 antigen-like	CD5L_HUMAN	21	-11.9175	0.880825	Dengue	QC	NaN	NaN	NaN
Dengue / QC	P01602	P01602	-0.00187567	0.00187567	0.521405	0.178125	176	P01602	IGKV1-5	Immunoglobulin kappa variable 1-5	KV105_HUMAN	5	-0.129927	0.998701	Dengue	QC	NaN	NaN	NaN
Dengue / QC	O60814;P06899;P23527;P33778;P57053;P58876;P62807;Q16778;Q5QNW6;Q5QNW6-2;Q8N257;Q93079;Q99877;Q99879;Q99880;U3KQK0	O60814;P06899;P23527;P33778;P57053;P58876;P62807;Q16778;Q5QNW6;Q5QNW6-2;Q8N257;Q93079;Q99877;Q99879;Q99880;U3KQK0	-0.0894012	0.0894012	0.52584	0.179338	98	O60814;P06899;P23527;P33778;P57053;P58876;P62807;Q16778;Q5QNW6;Q5QNW6-2;Q8N257;Q93079;Q99877;Q99879;Q99880;U3KQK0	HIST1H2BK;HIST1H2BJ;HIST1H2BO;HIST1H2BB;H2BFS;HIST1H2BD;HIST1H2BC;HIST2H2BE;HIST2H2BF;HIST2H2BF;HIST3H2BB;HIST1H2BH;HIST1H2BN;HIST1H2BM;HIST1H2BL;HIST1H2BN	Histone H2B type 1-K;Histone H2B type 1-J;Histone H2B type 1-O;Histone H2B type 1-B;Histone H2B type F-S;Histone H2B type 1-D;Histone H2B type 1-C/E/F/G/I;Histone H2B type 2-E;Histone H2B type 2-F;Isoform 2 of Histone H2B type 2-F;Histone H2B type 3-B;Histone H2B type 1-H;Histone H2B type 1-N;Histone H2B type 1-M;Histone H2B type 1-L;Histone H2B	H2B1K_HUMAN;H2B1J_HUMAN;H2B1O_HUMAN;H2B1B_HUMAN;H2BFS_HUMAN;H2B1D_HUMAN;H2B1C_HUMAN;H2B2E_HUMAN;H2B2F_HUMAN;H2B2F_HUMAN;H2B3B_HUMAN;H2B1H_HUMAN;H2B1N_HUMAN;H2B1M_HUMAN;H2B1L_HUMAN;U3KQK0_HUMAN	4	-6.00872	0.939913	Dengue	QC	NaN	NaN	NaN
Dengue / QC	A0A075B7D8	A0A075B7D8	0.325971	0.325971	0.531912	0.180666	176	A0A075B7D8	IGHV3OR15-7	Immunoglobulin heavy variable 3/OR15-7 (pseudogene) (Fragment)	A0A075B7D8_HUMAN	3	25.3508	1.25351	Dengue	QC	NaN	NaN	NaN
Dengue / QC	Q15582	Q15582	0.0234903	0.0234903	0.534442	0.181226	166	Q15582	TGFBI	Transforming growth factor-beta-induced protein ig-h3	BGH3_HUMAN	27	1.64155	1.01642	Dengue	QC	NaN	NaN	NaN
Dengue / QC	P04004	P04004	0.0694881	0.0694881	0.541143	0.182897	176	P04004	VTN	Vitronectin	VTNC_HUMAN	28	4.93443	1.04934	Dengue	QC	NaN	NaN	NaN
Dengue / QC	A0A075B6P5;P01615	A0A075B6P5;P01615	-0.023164	0.023164	0.546782	0.1845	172	A0A075B6P5;P01615	IGKV2-28;IGKV2D-28	Immunoglobulin kappa variable 2-28;Immunoglobulin kappa variable 2D-28	KV228_HUMAN;KVD28_HUMAN	1	-1.59278	0.984072	Dengue	QC	NaN	NaN	NaN
Dengue / QC	P33908	P33908	0.188462	0.188462	0.54744	0.184571	108	P33908	MAN1A1	Mannosyl-oligosaccharide 1,2-alpha-mannosidase IA	MA1A1_HUMAN	8	13.9548	1.13955	Dengue	QC	NaN	NaN	NaN
Dengue / QC	P23142-4	P23142-4	0.0489831	0.0489831	0.549553	0.184844	176	P23142-4	FBLN1	Isoform C of Fibulin-1	FBLN1_HUMAN	10	3.45354	1.03454	Dengue	QC	NaN	NaN	NaN
Dengue / QC	P01766	P01766	0.0411068	0.0411068	0.549759	0.184844	176	P01766	IGHV3-13	Immunoglobulin heavy variable 3-13	HV313_HUMAN	3	2.89029	1.0289	Dengue	QC	NaN	NaN	NaN
Dengue / QC	B4E1Z4	B4E1Z4	-0.0177246	0.0177246	0.556505	0.18671	176	B4E1Z4	NaN	cDNA FLJ55673, highly similar to Complement factor B (EC 3.4.21.47)	B4E1Z4_HUMAN	99	-1.22106	0.987789	Dengue	QC	NaN	NaN	NaN
Dengue / QC	P01861	P01861	-0.0199171	0.0199171	0.568816	0.190685	176	P01861	IGHG4	Immunoglobulin heavy constant gamma 4	IGHG4_HUMAN	24	-1.37106	0.986289	Dengue	QC	NaN	NaN	NaN
Dengue / QC	A0A0A0MS09;P01880;P01880-2	A0A0A0MS09;P01880;P01880-2	0.0699222	0.0699222	0.581334	0.194061	150	A0A0A0MS09;P01880;P01880-2	IGHD	Immunoglobulin heavy constant delta (Fragment);Immunoglobulin heavy constant delta;Isoform 2 of Immunoglobulin heavy constant delta	A0A0A0MS09_HUMAN;IGHD_HUMAN;IGHD_HUMAN	17	4.96601	1.04966	Dengue	QC	NaN	NaN	NaN
Dengue / QC	P07358	P07358	-0.02634	0.02634	0.581711	0.194061	176	P07358	C8B	Complement component C8 beta chain	CO8B_HUMAN	44	-1.80919	0.981908	Dengue	QC	NaN	NaN	NaN
Dengue / QC	P10909;P10909-2;P10909-4;P10909-5	P10909;P10909-2;P10909-4;P10909-5	-0.121703	0.121703	0.589374	0.195615	176	P10909;P10909-2;P10909-4;P10909-5	CLU	Clusterin;Isoform 2 of Clusterin;Isoform 4 of Clusterin;Isoform 5 of Clusterin	CLUS_HUMAN	38	-8.08979	0.919102	Dengue	QC	NaN	NaN	NaN
Dengue / QC	P01762	P01762	0.10177	0.10177	0.589122	0.195615	174	P01762	IGHV3-11	Immunoglobulin heavy variable 3-11	HV311_HUMAN	3	7.30894	1.07309	Dengue	QC	NaN	NaN	NaN
Dengue / QC	P02730	P02730	-0.306298	0.306298	0.589393	0.195615	46	P02730	SLC4A1	Band 3 anion transport protein	B3AT_HUMAN	7	-19.1286	0.808714	Dengue	QC	NaN	NaN	NaN
Dengue / QC	Q02985;Q02985-2	Q02985;Q02985-2	0.732968	0.732968	0.59713	0.197446	84	Q02985;Q02985-2	CFHR3	Complement factor H-related protein 3;Isoform 2 of Complement factor H-related protein 3	FHR3_HUMAN	3	66.2055	1.66206	Dengue	QC	NaN	NaN	NaN
Dengue / QC	C9JHR8;F5GZZ9;Q86VB7;Q86VB7-2;Q86VB7-3;Q86VB7-4	C9JHR8;F5GZZ9;Q86VB7;Q86VB7-2;Q86VB7-3;Q86VB7-4	-1.45629	1.45629	0.608748	0.200163	74	C9JHR8;F5GZZ9;Q86VB7;Q86VB7-2;Q86VB7-3;Q86VB7-4	CD163	Scavenger receptor cysteine-rich type 1 protein M130;Scavenger receptor cysteine-rich type 1 protein M130;Scavenger receptor cysteine-rich type 1 protein M130;Isoform 2 of Scavenger receptor cysteine-rich type 1 protein M130;Isoform 3 of Scavenger receptor cysteine-rich type 1 protein M130;Isoform 4 of Scavenger receptor cysteine-rich type 1 protein M130	C9JHR8_HUMAN;F5GZZ9_HUMAN;C163A_HUMAN;C163A_HUMAN;C163A_HUMAN;C163A_HUMAN	15	-63.557	0.36443	Dengue	QC	NaN	NaN	NaN
Dengue / QC	P01857	P01857	-0.0619641	0.0619641	0.611795	0.200461	176	P01857	IGHG1	Immunoglobulin heavy constant gamma 1	IGHG1_HUMAN	41	-4.2041	0.957959	Dengue	QC	NaN	NaN	NaN
Dengue / QC	P02652;V9GYM3	P02652;V9GYM3	0.107332	0.107332	0.618413	0.202051	176	P02652;V9GYM3	APOA2	Apolipoprotein A-II	APOA2_HUMAN;V9GYM3_HUMAN	12	7.72344	1.07723	Dengue	QC	NaN	NaN	NaN
Dengue / QC	A0A075B6S5	A0A075B6S5	0.522424	0.522424	0.638266	0.208207	132	A0A075B6S5	IGKV1-27	Immunoglobulin kappa variable 1-27	KV127_HUMAN	4	43.6367	1.43637	Dengue	QC	NaN	NaN	NaN
Dengue / QC	P14151;P14151-2	P14151;P14151-2	-0.0494376	0.0494376	0.652118	0.212054	170	P14151;P14151-2	SELL	L-selectin;Isoform 2 of L-selectin	LYAM1_HUMAN	10	-3.36871	0.966313	Dengue	QC	NaN	NaN	NaN
Dengue / QC	P48740	P48740	-0.0346596	0.0346596	0.661977	0.214375	176	P48740	MASP1	Mannan-binding lectin serine protease 1	MASP1_HUMAN	24	-2.37379	0.976262	Dengue	QC	NaN	NaN	NaN
Dengue / QC	P05019;P05019-2;P05019-3;P05019-4;Q13429	P05019;P05019-2;P05019-3;P05019-4;Q13429	0.437854	0.437854	0.670213	0.216062	66	P05019;P05019-2;P05019-3;P05019-4;Q13429	IGF1	Insulin-like growth factor I;Isoform 2 of Insulin-like growth factor I;Isoform 3 of Insulin-like growth factor I;Isoform 4 of Insulin-like growth factor I;Insulin-like growth factor I (Fragment)	IGF1_HUMAN;IGF1_HUMAN;IGF1_HUMAN;IGF1_HUMAN;Q13429_HUMAN	2	35.4588	1.35459	Dengue	QC	NaN	NaN	NaN
Dengue / QC	P02741	P02741	0.15239	0.15239	0.670859	0.216102	152	P02741	CRP	C-reactive protein	CRP_HUMAN	10	11.1409	1.11141	Dengue	QC	NaN	NaN	NaN
Dengue / QC	A0A0A0MS14	A0A0A0MS14	0.0851016	0.0851016	0.681987	0.218151	176	A0A0A0MS14	IGHV1-45	Immunoglobulin heavy variable 1-45	HV145_HUMAN	3	6.07624	1.06076	Dengue	QC	NaN	NaN	NaN
Dengue / QC	A0A0U1RRM4;A6NLN1;K7EKJ7;K7ELW5;K7ES59;P26599;P26599-2;P26599-3	A0A0U1RRM4;A6NLN1;K7EKJ7;K7ELW5;K7ES59;P26599;P26599-2;P26599-3	-0.218776	0.218776	0.68178	0.218151	16	A0A0U1RRM4;A6NLN1;K7EKJ7;K7ELW5;K7ES59;P26599;P26599-2;P26599-3	PTBP1	Polypyrimidine tract-binding protein 1;Polypyrimidine tract binding protein 1, isoform CRA_b;Polypyrimidine tract-binding protein 1 (Fragment);Polypyrimidine tract-binding protein 1 (Fragment);Polypyrimidine tract-binding protein 1 (Fragment);Polypyrimidine tract-binding protein 1;Isoform 2 of Polypyrimidine tract-binding protein 1;Isoform 3 of Polypyrimidine tract-binding protein 1	A0A0U1RRM4_HUMAN;A6NLN1_HUMAN;K7EKJ7_HUMAN;K7ELW5_HUMAN;K7ES59_HUMAN;PTBP1_HUMAN;PTBP1_HUMAN;PTBP1_HUMAN	2	-14.0706	0.859294	Dengue	QC	NaN	NaN	NaN
Dengue / QC	P04180	P04180	0.000322899	0.000322899	0.686837	0.219362	174	P04180	LCAT	Phosphatidylcholine-sterol acyltransferase	LCAT_HUMAN	9	0.0223842	1.00022	Dengue	QC	NaN	NaN	NaN
Dengue / QC	P07996	P07996	-0.0251949	0.0251949	0.691932	0.220071	170	P07996	THBS1	Thrombospondin-1	TSP1_HUMAN	57	-1.73122	0.982688	Dengue	QC	NaN	NaN	NaN
Dengue / QC	Q96KN2	Q96KN2	0.0040004	0.0040004	0.692409	0.220071	140	Q96KN2	CNDP1	Beta-Ala-His dipeptidase	CNDP1_HUMAN	18	0.277671	1.00278	Dengue	QC	NaN	NaN	NaN
Dengue / QC	A0A0B4J1X8	A0A0B4J1X8	0.21735	0.21735	0.695211	0.220668	176	A0A0B4J1X8	IGHV3-43	Immunoglobulin heavy variable 3-43	HV343_HUMAN	3	16.2596	1.1626	Dengue	QC	NaN	NaN	NaN
Dengue / QC	H0Y2Y8;Q15942	H0Y2Y8;Q15942	0.275877	0.275877	0.702663	0.222348	52	H0Y2Y8;Q15942	ZYX	Zyxin (Fragment);Zyxin	H0Y2Y8_HUMAN;ZYX_HUMAN	3	21.073	1.21073	Dengue	QC	NaN	NaN	NaN
Dengue / QC	P18206;P18206-2	P18206;P18206-2	0.0785458	0.0785458	0.70806	0.223712	78	P18206;P18206-2	VCL	Vinculin;Isoform 1 of Vinculin	VINC_HUMAN	15	5.59531	1.05595	Dengue	QC	NaN	NaN	NaN
Dengue / QC	P23083	P23083	0.0731201	0.0731201	0.715857	0.225829	176	P23083	IGHV1-2	Immunoglobulin heavy variable 1-2	HV102_HUMAN	5	5.19894	1.05199	Dengue	QC	NaN	NaN	NaN
Dengue / QC	P07357	P07357	0.0878987	0.0878987	0.720973	0.226667	176	P07357	C8A	Complement component C8 alpha chain	CO8A_HUMAN	39	6.28211	1.06282	Dengue	QC	NaN	NaN	NaN
Dengue / QC	P02748	P02748	0.0822018	0.0822018	0.721345	0.226667	176	P02748	C9	Complement component C9	CO9_HUMAN	51	5.86325	1.05863	Dengue	QC	NaN	NaN	NaN
Dengue / QC	P10721;P10721-2;P10721-3	P10721;P10721-2;P10721-3	0.858882	0.858882	0.724136	0.22705	24	P10721;P10721-2;P10721-3	KIT	Mast/stem cell growth factor receptor Kit;Isoform 2 of Mast/stem cell growth factor receptor Kit;Isoform 3 of Mast/stem cell growth factor receptor Kit	KIT_HUMAN	4	81.3633	1.81363	Dengue	QC	NaN	NaN	NaN
Dengue / QC	A0A0J9YVT0;P0DP02	A0A0J9YVT0;P0DP02	0.0689758	0.0689758	0.754069	0.235183	176	A0A0J9YVT0;P0DP02	IGHV3-33;IGHV3-30-3	Immunoglobulin heavy variable 3-33 (Fragment);Immunoglobulin heavy variable 3-30-3	A0A0J9YVT0_HUMAN;HVC33_HUMAN	12	4.89717	1.04897	Dengue	QC	NaN	NaN	NaN
Dengue / QC	P60709;P63261	P60709;P63261	0.0423923	0.0423923	0.758277	0.236316	176	P60709;P63261	ACTB;ACTG1	Actin, cytoplasmic 1;Actin, cytoplasmic 2	ACTB_HUMAN;ACTG_HUMAN	26	2.98201	1.02982	Dengue	QC	NaN	NaN	NaN
Dengue / QC	P01714	P01714	-0.0305389	0.0305389	0.778195	0.24161	176	P01714	IGLV3-19	Immunoglobulin lambda variable 3-19	LV319_HUMAN	7	-2.09455	0.979055	Dengue	QC	NaN	NaN	NaN
Dengue / QC	A0A075B6I9	A0A075B6I9	-0.0563732	0.0563732	0.79013	0.244946	148	A0A075B6I9	IGLV7-46	Immunoglobulin lambda variable 7-46	LV746_HUMAN	2	-3.83214	0.961679	Dengue	QC	NaN	NaN	NaN
Dengue / QC	P01019	P01019	-0.106009	0.106009	0.791326	0.245133	176	P01019	AGT	Angiotensinogen	ANGT_HUMAN	22	-7.08449	0.929155	Dengue	QC	NaN	NaN	NaN
Dengue / QC	A0A1W2PQB1;H0Y755;M9MML0;P08637	A0A1W2PQB1;H0Y755;M9MML0;P08637	-0.147621	0.147621	0.803205	0.247695	172	A0A1W2PQB1;H0Y755;M9MML0;P08637	FCGR3A	Fc of IgG low affinity IIIa receptor isoform 1;Low affinity immunoglobulin gamma Fc region receptor III-A (Fragment);Low affinity immunoglobulin gamma Fc region receptor III-A;Low affinity immunoglobulin gamma Fc region receptor III-A	A0A1W2PQB1_HUMAN;H0Y755_HUMAN;M9MML0_HUMAN;FCG3A_HUMAN	7	-9.72624	0.902738	Dengue	QC	NaN	NaN	NaN
Dengue / QC	A0A0U1RR32;A0A0U1RRH7;P0C0S8;P20671;Q16777;Q6FI13;Q96KK5;Q99878;Q9BTM1	A0A0U1RR32;A0A0U1RRH7;P0C0S8;P20671;Q16777;Q6FI13;Q96KK5;Q99878;Q9BTM1	-0.0913595	0.0913595	0.814233	0.249973	106	A0A0U1RR32;A0A0U1RRH7;P0C0S8;P20671;Q16777;Q6FI13;Q96KK5;Q99878;Q9BTM1	HIST1H3D;HIST1H3D;HIST1H2AG;HIST1H2AD;HIST2H2AC;HIST2H2AA3;HIST1H2AH;HIST1H2AJ;H2AFJ	Histone H2A;Histone H2A;Histone H2A type 1;Histone H2A type 1-D;Histone H2A type 2-C;Histone H2A type 2-A;Histone H2A type 1-H;Histone H2A type 1-J;Histone H2A.J	A0A0U1RR32_HUMAN;A0A0U1RRH7_HUMAN;H2A1_HUMAN;H2A1D_HUMAN;H2A2C_HUMAN;H2A2A_HUMAN;H2A1H_HUMAN;H2A1J_HUMAN;H2AJ_HUMAN	3	-6.13622	0.938638	Dengue	QC	NaN	NaN	NaN
Dengue / QC	P31146	P31146	1.34422	1.34422	0.821655	0.251877	30	P31146	CORO1A	Coronin-1A	COR1A_HUMAN	12	153.892	2.53892	Dengue	QC	NaN	NaN	NaN
Dengue / QC	A0A0B4J1V6	A0A0B4J1V6	0.179682	0.179682	0.825825	0.252779	158	A0A0B4J1V6	IGHV3-73	Immunoglobulin heavy variable 3-73	HV373_HUMAN	4	13.2634	1.13263	Dengue	QC	NaN	NaN	NaN
Dengue / QC	P04430	P04430	-0.0313494	0.0313494	0.834397	0.254646	170	P04430	IGKV1-16	Immunoglobulin kappa variable 1-16	KV116_HUMAN	3	-2.14954	0.978505	Dengue	QC	NaN	NaN	NaN
Dengue / QC	P20160	P20160	1.17768	1.17768	0.839327	0.255771	50	P20160	AZU1	Azurocidin	CAP7_HUMAN	4	126.213	2.26213	Dengue	QC	NaN	NaN	NaN
Dengue / QC	P01597;P04432	P01597;P04432	-0.0683127	0.0683127	0.842129	0.256436	160	P01597;P04432	IGKV1-39;IGKV1D-39	Immunoglobulin kappa variable 1-39;Immunoglobulin kappa variable 1D-39	KV139_HUMAN;KVD39_HUMAN	3	-4.62472	0.953753	Dengue	QC	NaN	NaN	NaN
Dengue / QC	O14791;O14791-2	O14791;O14791-2	-0.0258967	0.0258967	0.853146	0.258073	176	O14791;O14791-2	APOL1	Apolipoprotein L1;Isoform 2 of Apolipoprotein L1	APOL1_HUMAN	26	-1.77901	0.98221	Dengue	QC	NaN	NaN	NaN
Dengue / QC	O75882-2	O75882-2	0.000204976	0.000204976	0.857541	0.259213	176	O75882-2	ATRN	Isoform 2 of Attractin	ATRN_HUMAN	43	0.0142088	1.00014	Dengue	QC	NaN	NaN	NaN
Dengue / QC	P15169	P15169	0.0168961	0.0168961	0.864937	0.261257	176	P15169	CPN1	Carboxypeptidase N catalytic chain	CBPN_HUMAN	17	1.17803	1.01178	Dengue	QC	NaN	NaN	NaN
Dengue / QC	P02743	P02743	0.042425	0.042425	0.869778	0.262526	176	P02743	APCS	Serum amyloid P-component	SAMP_HUMAN	14	2.98434	1.02984	Dengue	QC	NaN	NaN	NaN
Dengue / QC	A0A0C4DH55;A0A0C4DH90	A0A0C4DH55;A0A0C4DH90	-0.212335	0.212335	0.879399	0.264961	172	A0A0C4DH55;A0A0C4DH90	IGKV3D-7;IGKV3OR2-268	Immunoglobulin kappa variable 3D-7;Immunoglobulin kappa variable 3/OR2-268 (non-functional) (Fragment)	KVD07_HUMAN;A0A0C4DH90_HUMAN	1	-13.6861	0.863139	Dengue	QC	NaN	NaN	NaN
Dengue / QC	P09871	P09871	0.00200724	0.00200724	0.891621	0.267746	176	P09871	C1S	Complement C1s subcomponent	C1S_HUMAN	44	0.139228	1.00139	Dengue	QC	NaN	NaN	NaN
Dengue / QC	Q9BXR6	Q9BXR6	0.150524	0.150524	0.903437	0.270309	156	Q9BXR6	CFHR5	Complement factor H-related protein 5	FHR5_HUMAN	21	10.9973	1.10997	Dengue	QC	NaN	NaN	NaN
Dengue / QC	P29622	P29622	0.177159	0.177159	0.90981	0.271821	176	P29622	SERPINA4	Kallistatin	KAIN_HUMAN	22	13.0655	1.13066	Dengue	QC	NaN	NaN	NaN
Dengue / QC	P02745	P02745	0.0598959	0.0598959	0.915202	0.273234	176	P02745	C1QA	Complement C1q subcomponent subunit A	C1QA_HUMAN	9	4.23905	1.04239	Dengue	QC	NaN	NaN	NaN
Dengue / QC	P61769	P61769	0.0565073	0.0565073	0.948144	0.281033	170	P61769	B2M	Beta-2-microglobulin	B2MG_HUMAN	6	3.99451	1.03995	Dengue	QC	NaN	NaN	NaN
Dengue / QC	Q5T123;Q9H299	Q5T123;Q9H299	-0.260518	0.260518	0.952844	0.281723	84	Q5T123;Q9H299	SH3BGRL3	SH3 domain-binding glutamic acid-rich-like protein 3	Q5T123_HUMAN;SH3L3_HUMAN	2	-16.5212	0.834788	Dengue	QC	NaN	NaN	NaN
Dengue / QC	A0A075B6K4	A0A075B6K4	0.0212229	0.0212229	0.98994	0.29091	176	A0A075B6K4	IGLV3-10	Immunoglobulin lambda variable 3-10	LV310_HUMAN	7	1.48193	1.01482	Dengue	QC	NaN	NaN	NaN
Dengue / QC	E7ER44;P02788	E7ER44;P02788	0.0691099	0.0691099	0.994665	0.291674	154	E7ER44;P02788	LTF	Lactotransferrin	E7ER44_HUMAN;TRFL_HUMAN	47	4.90692	1.04907	Dengue	QC	NaN	NaN	NaN
Zika / Dengue	P02675	P02675	-6.19643	6.19643	8.70345e-35	3.58582e-32	208	P02675	FGB	Fibrinogen beta chain	FIBB_HUMAN	53	-98.6364	0.013636	Zika	Dengue	NaN	NaN	NaN
Zika / Dengue	P02679;P02679-2	P02679;P02679-2	-6.26132	6.26132	4.08889e-33	8.42312e-31	204	P02679;P02679-2	FGG	Fibrinogen gamma chain;Isoform Gamma-A of Fibrinogen gamma chain	FIBG_HUMAN	48	-98.6964	0.0130363	Zika	Dengue	NaN	NaN	NaN
Zika / Dengue	P10720	P10720	0.972247	0.972247	2.29895e-17	5.26205e-16	230	P10720	PF4V1	Platelet factor 4 variant	PF4V_HUMAN	7	96.1894	1.96189	Zika	Dengue	NaN	NaN	NaN
Zika / Dengue	P02775	P02775	0.721728	0.721728	2.76224e-17	5.98969e-16	244	P02775	PPBP	Platelet basic protein	CXCL7_HUMAN	7	64.9157	1.64916	Zika	Dengue	NaN	NaN	NaN
Zika / Dengue	A0A075B6S2;A2NJV5	A0A075B6S2;A2NJV5	-0.87815	0.87815	1.0001e-14	1.64816e-13	206	A0A075B6S2;A2NJV5	IGKV2D-29;IGKV2-29	Immunoglobulin kappa variable 2D-29;Immunoglobulin kappa variable 2-29	KVD29_HUMAN;KV229_HUMAN	3	-45.5935	0.544065	Zika	Dengue	NaN	NaN	NaN
Zika / Dengue	P10643	P10643	-0.603824	0.603824	1.53495e-14	2.34222e-13	244	P10643	C7	Complement component C7	CO7_HUMAN	53	-34.1993	0.658007	Zika	Dengue	NaN	NaN	NaN
Zika / Dengue	P02671	P02671	-2.14754	2.14754	1.66835e-14	2.37738e-13	244	P02671	FGA	Fibrinogen alpha chain	FIBA_HUMAN	73	-77.4303	0.225697	Zika	Dengue	NaN	NaN	NaN
Zika / Dengue	P23142	P23142	-0.556636	0.556636	2.71058e-14	3.60245e-13	244	P23142	FBLN1	Fibulin-1	FBLN1_HUMAN	30	-32.0114	0.679886	Zika	Dengue	NaN	NaN	NaN
Zika / Dengue	P02647	P02647	0.446186	0.446186	5.07002e-12	4.85779e-11	244	P02647	APOA1	Apolipoprotein A-I	APOA1_HUMAN	52	36.2433	1.36243	Zika	Dengue	NaN	NaN	NaN
Zika / Dengue	P04003	P04003	-0.273775	0.273775	4.41777e-11	3.55473e-10	244	P04003	C4BPA	C4b-binding protein alpha chain	C4BPA_HUMAN	49	-17.2848	0.827152	Zika	Dengue	NaN	NaN	NaN
Zika / Dengue	P02768	P02768	0.33179	0.33179	9.96504e-11	7.07862e-10	244	P02768	ALB	Serum albumin	ALBU_HUMAN	148	25.8574	1.25857	Zika	Dengue	NaN	NaN	NaN
Zika / Dengue	Q9UEU0;Q9UEU0-2	Q9UEU0;Q9UEU0-2	-0.572825	0.572825	1.05494e-10	7.3667e-10	158	Q9UEU0;Q9UEU0-2	VTI1B	Vesicle transport through interaction with t-SNAREs homolog 1B;Isoform Short of Vesicle transport through interaction with t-SNAREs homolog 1B	VTI1B_HUMAN	1	-32.7701	0.672299	Zika	Dengue	NaN	NaN	NaN
Zika / Dengue	P07358	P07358	-0.310085	0.310085	5.78414e-10	3.50451e-09	244	P07358	C8B	Complement component C8 beta chain	CO8B_HUMAN	44	-19.3406	0.806594	Zika	Dengue	NaN	NaN	NaN
Zika / Dengue	P0DJI8	P0DJI8	-1.04392	1.04392	1.68827e-09	9.27423e-09	242	P0DJI8	SAA1	Serum amyloid A-1 protein	SAA1_HUMAN	14	-51.4992	0.485008	Zika	Dengue	NaN	NaN	NaN
Zika / Dengue	P04275	P04275	-0.692864	0.692864	2.12697e-09	1.15304e-08	240	P04275	VWF	von Willebrand factor	VWF_HUMAN	110	-38.1375	0.618625	Zika	Dengue	NaN	NaN	NaN
Zika / Dengue	Q6EMK4	Q6EMK4	-0.262574	0.262574	7.87834e-09	3.60653e-08	220	Q6EMK4	VASN	Vasorin	VASN_HUMAN	10	-16.6401	0.833599	Zika	Dengue	NaN	NaN	NaN
Zika / Dengue	P06727	P06727	0.552702	0.552702	9.87651e-09	4.32885e-08	244	P06727	APOA4	Apolipoprotein A-IV	APOA4_HUMAN	51	46.683	1.46683	Zika	Dengue	NaN	NaN	NaN
Zika / Dengue	I3L145;P04278	I3L145;P04278	-0.693549	0.693549	1.20132e-08	5.20993e-08	242	I3L145;P04278	SHBG	Sex hormone-binding globulin	I3L145_HUMAN;SHBG_HUMAN	23	-38.1669	0.618331	Zika	Dengue	NaN	NaN	NaN
Zika / Dengue	P02741	P02741	-1.09702	1.09702	2.1652e-08	8.75341e-08	210	P02741	CRP	C-reactive protein	CRP_HUMAN	10	-53.2518	0.467482	Zika	Dengue	NaN	NaN	NaN
Zika / Dengue	P01023	P01023	-0.261861	0.261861	3.62985e-08	1.3473e-07	244	P01023	A2M	Alpha-2-macroglobulin	A2MG_HUMAN	162	-16.5988	0.834012	Zika	Dengue	NaN	NaN	NaN
Zika / Dengue	Q16610	Q16610	-0.368265	0.368265	4.35169e-08	1.6008e-07	244	Q16610	ECM1	Extracellular matrix protein 1	ECM1_HUMAN	26	-22.5286	0.774714	Zika	Dengue	NaN	NaN	NaN
Zika / Dengue	A0A075B7D8	A0A075B7D8	-2.03517	2.03517	6.47094e-08	2.31829e-07	244	A0A075B7D8	IGHV3OR15-7	Immunoglobulin heavy variable 3/OR15-7 (pseudogene) (Fragment)	A0A075B7D8_HUMAN	3	-75.6021	0.243979	Zika	Dengue	NaN	NaN	NaN
Zika / Dengue	P00450	P00450	-0.175658	0.175658	7.44313e-08	2.6436e-07	244	P00450	CP	Ceruloplasmin	CERU_HUMAN	95	-11.4636	0.885364	Zika	Dengue	NaN	NaN	NaN
Zika / Dengue	Q14520;Q14520-2	Q14520;Q14520-2	-0.372445	0.372445	1.96925e-07	6.30281e-07	244	Q14520;Q14520-2	HABP2	Hyaluronan-binding protein 2;Isoform 2 of Hyaluronan-binding protein 2	HABP2_HUMAN	25	-22.7528	0.772472	Zika	Dengue	NaN	NaN	NaN
Zika / Dengue	A0A0C4DH31	A0A0C4DH31	-0.555654	0.555654	1.97345e-07	6.30281e-07	244	A0A0C4DH31	IGHV1-18	Immunoglobulin heavy variable 1-18	HV118_HUMAN	4	-31.9652	0.680348	Zika	Dengue	NaN	NaN	NaN
Zika / Dengue	H0YAC1;P03952	H0YAC1;P03952	0.230455	0.230455	2.25289e-07	6.78891e-07	244	H0YAC1;P03952	KLKB1	Plasma kallikrein (Fragment);Plasma kallikrein	H0YAC1_HUMAN;KLKB1_HUMAN	38	17.3205	1.1732	Zika	Dengue	NaN	NaN	NaN
Zika / Dengue	P68871	P68871	1.74682	1.74682	2.21844e-07	6.78891e-07	244	P68871	HBB	Hemoglobin subunit beta	HBB_HUMAN	23	235.618	3.35618	Zika	Dengue	NaN	NaN	NaN
Zika / Dengue	P06312	P06312	0.643941	0.643941	2.30613e-07	6.83543e-07	244	P06312	IGKV4-1	Immunoglobulin kappa variable 4-1	KV401_HUMAN	7	56.2592	1.56259	Zika	Dengue	NaN	NaN	NaN
Zika / Dengue	Q14624	Q14624	0.213437	0.213437	2.35108e-07	6.9189e-07	244	Q14624	ITIH4	Inter-alpha-trypsin inhibitor heavy chain H4	ITIH4_HUMAN	68	15.9447	1.15945	Zika	Dengue	NaN	NaN	NaN
Zika / Dengue	C9JB55	C9JB55	0.268854	0.268854	2.62918e-07	7.62832e-07	226	C9JB55	TF	Serotransferrin (Fragment)	C9JB55_HUMAN	2	20.485	1.20485	Zika	Dengue	NaN	NaN	NaN
Zika / Dengue	P10809	P10809	-1.06473	1.06473	3.70113e-07	1.0234e-06	48	P10809	HSPD1	60 kDa heat shock protein, mitochondrial	CH60_HUMAN	4	-52.1938	0.478062	Zika	Dengue	NaN	NaN	NaN
Zika / Dengue	A0A0B4J1U7	A0A0B4J1U7	0.671278	0.671278	4.37246e-07	1.16978e-06	244	A0A0B4J1U7	IGHV6-1	Immunoglobulin heavy variable 6-1	HV601_HUMAN	9	59.2483	1.59248	Zika	Dengue	NaN	NaN	NaN
Zika / Dengue	P07998	P07998	-1.35604	1.35604	4.92083e-07	1.29133e-06	98	P07998	RNASE1	Ribonuclease pancreatic	RNAS1_HUMAN	3	-60.9347	0.390653	Zika	Dengue	NaN	NaN	NaN
Zika / Dengue	A0A0G2JMY9;Q8N6C8;Q8N6C8-3	A0A0G2JMY9;Q8N6C8;Q8N6C8-3	-0.431779	0.431779	6.11003e-07	1.55391e-06	98	A0A0G2JMY9;Q8N6C8;Q8N6C8-3	LILRA3	Leukocyte immunoglobulin-like receptor subfamily A member 3;Leukocyte immunoglobulin-like receptor subfamily A member 3;Isoform 3 of Leukocyte immunoglobulin-like receptor subfamily A member 3	A0A0G2JMY9_HUMAN;LIRA3_HUMAN;LIRA3_HUMAN	6	-25.8653	0.741347	Zika	Dengue	NaN	NaN	NaN
Zika / Dengue	Q12805;Q12805-2;Q12805-4	Q12805;Q12805-2;Q12805-4	-0.457853	0.457853	7.16414e-07	1.79977e-06	244	Q12805;Q12805-2;Q12805-4	EFEMP1	EGF-containing fibulin-like extracellular matrix protein 1;Isoform 2 of EGF-containing fibulin-like extracellular matrix protein 1;Isoform 4 of EGF-containing fibulin-like extracellular matrix protein 1	FBLN3_HUMAN	19	-27.1931	0.728069	Zika	Dengue	NaN	NaN	NaN
Zika / Dengue	P22792	P22792	-0.254477	0.254477	7.55745e-07	1.86447e-06	244	P22792	CPN2	Carboxypeptidase N subunit 2	CPN2_HUMAN	16	-16.1709	0.838291	Zika	Dengue	NaN	NaN	NaN
Zika / Dengue	O75636	O75636	0.335478	0.335478	8.43024e-07	2.05518e-06	244	O75636	FCN3	Ficolin-3	FCN3_HUMAN	13	26.1796	1.2618	Zika	Dengue	NaN	NaN	NaN
Zika / Dengue	P80748	P80748	-0.473455	0.473455	8.57499e-07	2.07817e-06	236	P80748	IGLV3-21	Immunoglobulin lambda variable 3-21	LV321_HUMAN	3	-27.9762	0.720238	Zika	Dengue	NaN	NaN	NaN
Zika / Dengue	H0Y2P0;H0Y5E4;H0YCV9;H0YDW7;H0YDX6;P16070;P16070-10;P16070-11;P16070-12;P16070-13;P16070-14;P16070-15;P16070-16;P16070-17;P16070-18;P16070-3;P16070-4;P16070-5;P16070-6;P16070-7;P16070-8;P16070-9	H0Y2P0;H0Y5E4;H0YCV9;H0YDW7;H0YDX6;P16070;P16070-10;P16070-11;P16070-12;P16070-13;P16070-14;P16070-15;P16070-16;P16070-17;P16070-18;P16070-3;P16070-4;P16070-5;P16070-6;P16070-7;P16070-8;P16070-9	-0.298364	0.298364	8.63244e-07	2.07986e-06	226	H0Y2P0;H0Y5E4;H0YCV9;H0YDW7;H0YDX6;P16070;P16070-10;P16070-11;P16070-12;P16070-13;P16070-14;P16070-15;P16070-16;P16070-17;P16070-18;P16070-3;P16070-4;P16070-5;P16070-6;P16070-7;P16070-8;P16070-9	CD44	CD44 antigen (Fragment);CD44 antigen (Fragment);CD44 antigen (Fragment);CD44 antigen (Fragment);CD44 antigen (Fragment);CD44 antigen;Isoform 10 of CD44 antigen;Isoform 11 of CD44 antigen;Isoform 12 of CD44 antigen;Isoform 13 of CD44 antigen;Isoform 14 of CD44 antigen;Isoform 15 of CD44 antigen;Isoform 16 of CD44 antigen;Isoform 17 of CD44 antigen;Isoform 18 of CD44 antigen;Isoform 3 of CD44 antig…	H0Y2P0_HUMAN;H0Y5E4_HUMAN;H0YCV9_HUMAN;H0YDW7_HUMAN;H0YDX6_HUMAN;CD44_HUMAN;CD44_HUMAN;CD44_HUMAN;CD44_HUMAN;CD44_HUMAN;CD44_HUMAN;CD44_HUMAN;CD44_HUMAN;CD44_HUMAN;CD44_HUMAN;CD44_HUMAN;CD44_HUMAN;CD44_HUMAN;CD44_HUMAN;CD44_HUMAN;CD44_HUMAN;CD44_HUMAN	4	-18.6826	0.813174	Zika	Dengue	NaN	NaN	NaN
Zika / Dengue	P02787	P02787	0.214172	0.214172	9.28134e-07	2.2232e-06	244	P02787	TF	Serotransferrin	TRFE_HUMAN	116	16.0038	1.16004	Zika	Dengue	NaN	NaN	NaN
Zika / Dengue	P02042	P02042	1.65935	1.65935	1.59702e-06	3.61523e-06	216	P02042	HBD	Hemoglobin subunit delta	HBD_HUMAN	4	215.873	3.15873	Zika	Dengue	NaN	NaN	NaN
Zika / Dengue	P69905	P69905	1.46579	1.46579	1.67904e-06	3.73598e-06	244	P69905	HBA1	Hemoglobin subunit alpha	HBA_HUMAN	23	176.214	2.76214	Zika	Dengue	NaN	NaN	NaN
Zika / Dengue	P01705	P01705	-0.552645	0.552645	1.6957e-06	3.73598e-06	196	P01705	IGLV2-23	Immunoglobulin lambda variable 2-23	LV223_HUMAN	2	-31.8231	0.681769	Zika	Dengue	NaN	NaN	NaN
Zika / Dengue	P0DOY3	P0DOY3	-0.927417	0.927417	1.7917e-06	3.86482e-06	180	P0DOY3	IGLC3	Immunoglobulin lambda constant 3	IGLC3_HUMAN	3	-47.4201	0.525799	Zika	Dengue	NaN	NaN	NaN
Zika / Dengue	P36980;P36980-2	P36980;P36980-2	-0.32973	0.32973	1.77692e-06	3.86482e-06	244	P36980;P36980-2	CFHR2	Complement factor H-related protein 2;Isoform Short of Complement factor H-related protein 2	FHR2_HUMAN	5	-20.4314	0.795686	Zika	Dengue	NaN	NaN	NaN
Zika / Dengue	P02766	P02766	0.454161	0.454161	2.31522e-06	4.81752e-06	244	P02766	TTR	Transthyretin	TTHY_HUMAN	16	36.9985	1.36999	Zika	Dengue	NaN	NaN	NaN
Zika / Dengue	P08571	P08571	-0.293366	0.293366	2.43863e-06	4.99858e-06	242	P08571	CD14	Monocyte differentiation antigen CD14	CD14_HUMAN	10	-18.4004	0.815996	Zika	Dengue	NaN	NaN	NaN
Zika / Dengue	P27105	P27105	3.05918	3.05918	2.67416e-06	5.42735e-06	38	P27105	STOM	Erythrocyte band 7 integral membrane protein	STOM_HUMAN	4	733.497	8.33497	Zika	Dengue	NaN	NaN	NaN
Zika / Dengue	P00740	P00740	0.323552	0.323552	3.2282e-06	6.48246e-06	244	P00740	F9	Coagulation factor IX	FA9_HUMAN	18	25.1408	1.25141	Zika	Dengue	NaN	NaN	NaN
Zika / Dengue	A0A024R0T9;K7ER74;P02655	A0A024R0T9;K7ER74;P02655	0.543575	0.543575	4.27874e-06	8.3547e-06	230	A0A024R0T9;K7ER74;P02655	APOC4-APOC2;APOC4-APOC2;APOC2	Apolipoprotein C-II isoform 1;APOC4-APOC2 readthrough (NMD candidate);Apolipoprotein C-II	A0A024R0T9_HUMAN;K7ER74_HUMAN;APOC2_HUMAN	7	45.758	1.45758	Zika	Dengue	NaN	NaN	NaN
Zika / Dengue	P05546	P05546	0.20806	0.20806	4.67464e-06	9.04204e-06	244	P05546	SERPIND1	Heparin cofactor 2	HEP2_HUMAN	30	15.5134	1.15513	Zika	Dengue	NaN	NaN	NaN
Zika / Dengue	P04004	P04004	-0.254438	0.254438	4.87191e-06	9.33594e-06	244	P04004	VTN	Vitronectin	VTNC_HUMAN	28	-16.1686	0.838314	Zika	Dengue	NaN	NaN	NaN
Zika / Dengue	P41222	P41222	-0.471677	0.471677	5.83021e-06	1.10186e-05	194	P41222	PTGDS	Prostaglandin-H2 D-isomerase	PTGDS_HUMAN	5	-27.8874	0.721126	Zika	Dengue	NaN	NaN	NaN
Zika / Dengue	G3V0E5;P02786	G3V0E5;P02786	-0.301273	0.301273	6.91573e-06	1.26635e-05	232	G3V0E5;P02786	TFRC	Transferrin receptor (P90, CD71), isoform CRA_c;Transferrin receptor protein 1	G3V0E5_HUMAN;TFR1_HUMAN	12	-18.8464	0.811536	Zika	Dengue	NaN	NaN	NaN
Zika / Dengue	P30043	P30043	1.67803	1.67803	7.10234e-06	1.28906e-05	62	P30043	BLVRB	Flavin reductase (NADPH)	BLVRB_HUMAN	8	219.992	3.19992	Zika	Dengue	NaN	NaN	NaN
Zika / Dengue	E9PJ29;Q86UD1	E9PJ29;Q86UD1	-0.780827	0.780827	7.19822e-06	1.30073e-05	110	E9PJ29;Q86UD1	OAF	Out at first protein homolog	E9PJ29_HUMAN;OAF_HUMAN	5	-41.7967	0.582033	Zika	Dengue	NaN	NaN	NaN
Zika / Dengue	A0A0C4DH68	A0A0C4DH68	0.366434	0.366434	7.62771e-06	1.37232e-05	244	A0A0C4DH68	IGKV2-24	Immunoglobulin kappa variable 2-24	KV224_HUMAN	8	28.9163	1.28916	Zika	Dengue	NaN	NaN	NaN
Zika / Dengue	P18065	P18065	-0.693832	0.693832	7.88882e-06	1.40095e-05	92	P18065	IGFBP2	Insulin-like growth factor-binding protein 2	IBP2_HUMAN	12	-38.179	0.61821	Zika	Dengue	NaN	NaN	NaN
Zika / Dengue	P26038	P26038	-1.30883	1.30883	8.62022e-06	1.51775e-05	74	P26038	MSN	Moesin	MOES_HUMAN	13	-59.6352	0.403648	Zika	Dengue	NaN	NaN	NaN
Zika / Dengue	P04196	P04196	0.29361	0.29361	9.78865e-06	1.69451e-05	244	P04196	HRG	Histidine-rich glycoprotein	HRG_HUMAN	29	22.5703	1.2257	Zika	Dengue	NaN	NaN	NaN
Zika / Dengue	P36222	P36222	-2.20117	2.20117	1.09166e-05	1.86625e-05	30	P36222	CHI3L1	Chitinase-3-like protein 1	CH3L1_HUMAN	4	-78.2539	0.217461	Zika	Dengue	NaN	NaN	NaN
Zika / Dengue	P01034	P01034	-0.158252	0.158252	1.21602e-05	2.05557e-05	244	P01034	CST3	Cystatin-C	CYTC_HUMAN	9	-10.389	0.89611	Zika	Dengue	NaN	NaN	NaN
Zika / Dengue	A0A1W2PQB1;H0Y755;M9MML0;P08637	A0A1W2PQB1;H0Y755;M9MML0;P08637	-0.338791	0.338791	1.25155e-05	2.09609e-05	240	A0A1W2PQB1;H0Y755;M9MML0;P08637	FCGR3A	Fc of IgG low affinity IIIa receptor isoform 1;Low affinity immunoglobulin gamma Fc region receptor III-A (Fragment);Low affinity immunoglobulin gamma Fc region receptor III-A;Low affinity immunoglobulin gamma Fc region receptor III-A	A0A1W2PQB1_HUMAN;H0Y755_HUMAN;M9MML0_HUMAN;FCG3A_HUMAN	7	-20.9296	0.790704	Zika	Dengue	NaN	NaN	NaN
Zika / Dengue	Q15582	Q15582	-0.361043	0.361043	1.29774e-05	2.15592e-05	228	Q15582	TGFBI	Transforming growth factor-beta-induced protein ig-h3	BGH3_HUMAN	27	-22.1399	0.778601	Zika	Dengue	NaN	NaN	NaN
Zika / Dengue	P11226	P11226	-0.572912	0.572912	1.31256e-05	2.17179e-05	120	P11226	MBL2	Mannose-binding protein C	MBL2_HUMAN	6	-32.7741	0.672259	Zika	Dengue	NaN	NaN	NaN
Zika / Dengue	B5MDF5;J3KQE5;P62826	B5MDF5;J3KQE5;P62826	0.337024	0.337024	1.49664e-05	2.42761e-05	68	B5MDF5;J3KQE5;P62826	RAN	GTP-binding nuclear protein Ran;GTP-binding nuclear protein Ran (Fragment);GTP-binding nuclear protein Ran	B5MDF5_HUMAN;J3KQE5_HUMAN;RAN_HUMAN	3	26.3149	1.26315	Zika	Dengue	NaN	NaN	NaN
Zika / Dengue	P00918	P00918	1.19875	1.19875	1.67366e-05	2.7041e-05	166	P00918	CA2	Carbonic anhydrase 2	CAH2_HUMAN	9	129.541	2.29541	Zika	Dengue	NaN	NaN	NaN
Zika / Dengue	E7EPG1;Q13201	E7EPG1;Q13201	0.395998	0.395998	1.8156e-05	2.92199e-05	132	E7EPG1;Q13201	MMRN1	Multimerin-1	E7EPG1_HUMAN;MMRN1_HUMAN	4	31.5853	1.31585	Zika	Dengue	NaN	NaN	NaN
Zika / Dengue	P0DOY2	P0DOY2	0.256241	0.256241	2.67867e-05	4.18034e-05	244	P0DOY2	IGLC2	Immunoglobulin lambda constant 2	IGLC2_HUMAN	20	19.4362	1.19436	Zika	Dengue	NaN	NaN	NaN
Zika / Dengue	P01042	P01042	0.15398	0.15398	3.24992e-05	5.03371e-05	244	P01042	KNG1	Kininogen-1	KNG1_HUMAN	47	11.2635	1.11263	Zika	Dengue	NaN	NaN	NaN
Zika / Dengue	A0A087X0I0;A0A140T8Y3;A0A140T8Z8;A0A140T9C0;A0A140T9L7;A0A140TA41;A0A140TA52;P22105;P22105-3;P22105-4	A0A087X0I0;A0A140T8Y3;A0A140T8Z8;A0A140T9C0;A0A140T9L7;A0A140TA41;A0A140TA52;P22105;P22105-3;P22105-4	-0.618314	0.618314	4.00076e-05	6.05998e-05	176	A0A087X0I0;A0A140T8Y3;A0A140T8Z8;A0A140T9C0;A0A140T9L7;A0A140TA41;A0A140TA52;P22105;P22105-3;P22105-4	TNXB	Tenascin-X;Tenascin-X;Tenascin-X (Fragment);Tenascin-X;Tenascin-X (Fragment);Tenascin-X;Tenascin-X;Tenascin-X;Isoform 4 of Tenascin-X;Isoform 5 of Tenascin-X	A0A087X0I0_HUMAN;A0A140T8Y3_HUMAN;A0A140T8Z8_HUMAN;A0A140T9C0_HUMAN;A0A140T9L7_HUMAN;A0A140TA41_HUMAN;A0A140TA52_HUMAN;TENX_HUMAN;TENX_HUMAN;TENX_HUMAN	18	-34.8568	0.651432	Zika	Dengue	NaN	NaN	NaN
Zika / Dengue	H0Y2Y8;Q15942	H0Y2Y8;Q15942	-0.320716	0.320716	4.04004e-05	6.09706e-05	60	H0Y2Y8;Q15942	ZYX	Zyxin (Fragment);Zyxin	H0Y2Y8_HUMAN;ZYX_HUMAN	3	-19.9328	0.800672	Zika	Dengue	NaN	NaN	NaN
Zika / Dengue	P20851;P20851-2	P20851;P20851-2	-0.241559	0.241559	4.23993e-05	6.37537e-05	244	P20851;P20851-2	C4BPB	C4b-binding protein beta chain;Isoform 2 of C4b-binding protein beta chain	C4BPB_HUMAN	11	-15.4169	0.845831	Zika	Dengue	NaN	NaN	NaN
Zika / Dengue	A0A0C4DH32	A0A0C4DH32	-0.566534	0.566534	4.40711e-05	6.60265e-05	108	A0A0C4DH32	IGHV3-20	Immunoglobulin heavy variable 3-20	HV320_HUMAN	2	-32.4763	0.675237	Zika	Dengue	NaN	NaN	NaN
Zika / Dengue	P61626	P61626	-0.313292	0.313292	5.03705e-05	7.35909e-05	240	P61626	LYZ	Lysozyme C	LYSC_HUMAN	11	-19.5197	0.804803	Zika	Dengue	NaN	NaN	NaN
Zika / Dengue	P19827	P19827	0.173315	0.173315	5.11903e-05	7.42211e-05	244	P19827	ITIH1	Inter-alpha-trypsin inhibitor heavy chain H1	ITIH1_HUMAN	53	12.7647	1.12765	Zika	Dengue	NaN	NaN	NaN
Zika / Dengue	P27169	P27169	0.163579	0.163579	5.16355e-05	7.42211e-05	244	P27169	PON1	Serum paraoxonase/arylesterase 1	PON1_HUMAN	20	12.0063	1.12006	Zika	Dengue	NaN	NaN	NaN
Zika / Dengue	P02745	P02745	-0.18985	0.18985	5.69591e-05	8.0367e-05	244	P02745	C1QA	Complement C1q subcomponent subunit A	C1QA_HUMAN	9	-12.3303	0.876697	Zika	Dengue	NaN	NaN	NaN
Zika / Dengue	P09172	P09172	-0.832093	0.832093	7.20239e-05	9.95767e-05	146	P09172	DBH	Dopamine beta-hydroxylase	DOPO_HUMAN	10	-43.8286	0.561714	Zika	Dengue	NaN	NaN	NaN
Zika / Dengue	P00491	P00491	2.5314	2.5314	8.81659e-05	0.000119488	12	P00491	PNP	Purine nucleoside phosphorylase	PNPH_HUMAN	3	478.133	5.78133	Zika	Dengue	NaN	NaN	NaN
Zika / Dengue	A0A182DWH7;P49908	A0A182DWH7;P49908	0.221392	0.221392	8.87154e-05	0.000119838	244	A0A182DWH7;P49908	SELENOP	Selenoprotein P (Fragment);Selenoprotein P	A0A182DWH7_HUMAN;SEPP1_HUMAN	9	16.5858	1.16586	Zika	Dengue	NaN	NaN	NaN
Zika / Dengue	P35858;P35858-2	P35858;P35858-2	0.32004	0.32004	9.14262e-05	0.000123097	240	P35858;P35858-2	IGFALS	Insulin-like growth factor-binding protein complex acid labile subunit;Isoform 2 of Insulin-like growth factor-binding protein complex acid labile subunit	ALS_HUMAN	28	24.8365	1.24837	Zika	Dengue	NaN	NaN	NaN
Zika / Dengue	P19320	P19320	-0.578326	0.578326	0.000102303	0.000136404	194	P19320	VCAM1	Vascular cell adhesion protein 1	VCAM1_HUMAN	17	-33.0259	0.669741	Zika	Dengue	NaN	NaN	NaN
Zika / Dengue	P48740-2	P48740-2	-0.53653	0.53653	0.000122867	0.000160194	144	P48740-2	MASP1	Isoform 2 of Mannan-binding lectin serine protease 1	MASP1_HUMAN	9	-31.0573	0.689427	Zika	Dengue	NaN	NaN	NaN
Zika / Dengue	P00488	P00488	-0.44629	0.44629	0.000127569	0.00016476	174	P00488	F13A1	Coagulation factor XIII A chain	F13A_HUMAN	22	-26.6072	0.733928	Zika	Dengue	NaN	NaN	NaN
Zika / Dengue	P10909;P10909-2;P10909-4;P10909-5	P10909;P10909-2;P10909-4;P10909-5	0.202162	0.202162	0.000133622	0.00017062	244	P10909;P10909-2;P10909-4;P10909-5	CLU	Clusterin;Isoform 2 of Clusterin;Isoform 4 of Clusterin;Isoform 5 of Clusterin	CLUS_HUMAN	38	15.0421	1.15042	Zika	Dengue	NaN	NaN	NaN
Zika / Dengue	P05164;P05164-2;P05164-3	P05164;P05164-2;P05164-3	-0.470097	0.470097	0.00013599	0.000172925	146	P05164;P05164-2;P05164-3	MPO	Myeloperoxidase;Isoform H14 of Myeloperoxidase;Isoform H7 of Myeloperoxidase	PERM_HUMAN	19	-27.8084	0.721916	Zika	Dengue	NaN	NaN	NaN
Zika / Dengue	P05160	P05160	-0.180607	0.180607	0.000139859	0.000176214	244	P05160	F13B	Coagulation factor XIII B chain	F13B_HUMAN	47	-11.7669	0.882331	Zika	Dengue	NaN	NaN	NaN
Zika / Dengue	P43121	P43121	-0.373627	0.373627	0.00015064	0.000187757	160	P43121	MCAM	Cell surface glycoprotein MUC18	MUC18_HUMAN	8	-22.816	0.77184	Zika	Dengue	NaN	NaN	NaN
Zika / Dengue	P22692;P22692-2	P22692;P22692-2	-1.25766	1.25766	0.000153646	0.000189528	66	P22692;P22692-2	IGFBP4	Insulin-like growth factor-binding protein 4;Isoform 2 of Insulin-like growth factor-binding protein 4	IBP4_HUMAN	4	-58.1779	0.418221	Zika	Dengue	NaN	NaN	NaN
Zika / Dengue	P51884	P51884	-0.460625	0.460625	0.00016597	0.000203511	244	P51884	LUM	Lumican	LUM_HUMAN	21	-27.3329	0.726671	Zika	Dengue	NaN	NaN	NaN
Zika / Dengue	P80108	P80108	0.188774	0.188774	0.000184805	0.0002246	244	P80108	GPLD1	Phosphatidylinositol-glycan-specific phospholipase D	PHLD_HUMAN	25	13.9795	1.13979	Zika	Dengue	NaN	NaN	NaN
Zika / Dengue	P11021	P11021	-0.397992	0.397992	0.000201086	0.000242243	142	P11021	HSPA5	78 kDa glucose-regulated protein	GRP78_HUMAN	17	-24.1086	0.758914	Zika	Dengue	NaN	NaN	NaN
Zika / Dengue	P23083	P23083	-0.270802	0.270802	0.000216308	0.000259245	244	P23083	IGHV1-2	Immunoglobulin heavy variable 1-2	HV102_HUMAN	5	-17.1141	0.828859	Zika	Dengue	NaN	NaN	NaN
Zika / Dengue	P98160	P98160	-1.04029	1.04029	0.000216457	0.000259245	104	P98160	HSPG2	Basement membrane-specific heparan sulfate proteoglycan core protein	PGBM_HUMAN	27	-51.377	0.48623	Zika	Dengue	NaN	NaN	NaN
Zika / Dengue	P20160	P20160	-0.510666	0.510666	0.000231852	0.000275282	62	P20160	AZU1	Azurocidin	CAP7_HUMAN	4	-29.8102	0.701898	Zika	Dengue	NaN	NaN	NaN
Zika / Dengue	P22894	P22894	-0.462134	0.462134	0.000255041	0.000298514	14	P22894	MMP8	Neutrophil collagenase	MMP8_HUMAN	4	-27.4088	0.725912	Zika	Dengue	NaN	NaN	NaN
Zika / Dengue	P01859	P01859	0.291454	0.291454	0.000283163	0.000327706	244	P01859	IGHG2	Immunoglobulin heavy constant gamma 2	IGHG2_HUMAN	18	22.3873	1.22387	Zika	Dengue	NaN	NaN	NaN
Zika / Dengue	P00747	P00747	0.151514	0.151514	0.000285117	0.000329042	244	P00747	PLG	Plasminogen	PLMN_HUMAN	90	11.0734	1.11073	Zika	Dengue	NaN	NaN	NaN
Zika / Dengue	P80188;P80188-2;X6R8F3	P80188;P80188-2;X6R8F3	-0.817666	0.817666	0.000297718	0.000342625	92	P80188;P80188-2;X6R8F3	LCN2	Neutrophil gelatinase-associated lipocalin;Isoform 2 of Neutrophil gelatinase-associated lipocalin;Neutrophil gelatinase-associated lipocalin	NGAL_HUMAN;NGAL_HUMAN;X6R8F3_HUMAN	3	-43.2641	0.567359	Zika	Dengue	NaN	NaN	NaN
Zika / Dengue	E9PEK4;P07333	E9PEK4;P07333	-1.21591	1.21591	0.000298676	0.00034277	50	E9PEK4;P07333	CSF1R	Macrophage colony-stimulating factor 1 receptor	E9PEK4_HUMAN;CSF1R_HUMAN	8	-56.9499	0.430501	Zika	Dengue	NaN	NaN	NaN
Zika / Dengue	A0A0G2JMI3	A0A0G2JMI3	-0.43482	0.43482	0.000312028	0.000356331	192	A0A0G2JMI3	IGHV1-69-2	Immunoglobulin heavy variable 1-69-2	HV692_HUMAN	4	-26.0214	0.739786	Zika	Dengue	NaN	NaN	NaN
Zika / Dengue	A0A075B6I4;A0A1W2PQ80	A0A075B6I4;A0A1W2PQ80	0.543204	0.543204	0.000334938	0.000380762	182	A0A075B6I4;A0A1W2PQ80	IGLV10-54	Immunoglobulin lambda variable 10-54	LVX54_HUMAN;A0A1W2PQ80_HUMAN	1	45.7205	1.45721	Zika	Dengue	NaN	NaN	NaN
Zika / Dengue	P18206;P18206-2	P18206;P18206-2	-0.779693	0.779693	0.00035075	0.000394833	122	P18206;P18206-2	VCL	Vinculin;Isoform 1 of Vinculin	VINC_HUMAN	15	-41.7509	0.582491	Zika	Dengue	NaN	NaN	NaN
Zika / Dengue	Q9Y5Y7	Q9Y5Y7	-0.209797	0.209797	0.000359753	0.000403864	170	Q9Y5Y7	LYVE1	Lymphatic vessel endothelial hyaluronic acid receptor 1	LYVE1_HUMAN	6	-13.5341	0.864659	Zika	Dengue	NaN	NaN	NaN
Zika / Dengue	Q08380	Q08380	-0.313633	0.313633	0.000387915	0.000433119	244	Q08380	LGALS3BP	Galectin-3-binding protein	LG3BP_HUMAN	28	-19.5387	0.804613	Zika	Dengue	NaN	NaN	NaN
Zika / Dengue	Q96KN2	Q96KN2	0.383815	0.383815	0.000397429	0.000442542	204	Q96KN2	CNDP1	Beta-Ala-His dipeptidase	CNDP1_HUMAN	18	30.4787	1.30479	Zika	Dengue	NaN	NaN	NaN
Zika / Dengue	P08697	P08697	0.256459	0.256459	0.000401767	0.000446167	244	P08697	SERPINF2	Alpha-2-antiplasmin	A2AP_HUMAN	31	19.4543	1.19454	Zika	Dengue	NaN	NaN	NaN
Zika / Dengue	A0A140TA49	A0A140TA49	0.500137	0.500137	0.000421551	0.000463277	244	A0A140TA49	C4A	Complement C4-A	A0A140TA49_HUMAN	9	41.4348	1.41435	Zika	Dengue	NaN	NaN	NaN
Zika / Dengue	J3KSI6;Q14126	J3KSI6;Q14126	-0.518594	0.518594	0.000421672	0.000463277	74	J3KSI6;Q14126	DSG2	Desmoglein-2	J3KSI6_HUMAN;DSG2_HUMAN	1	-30.1948	0.698052	Zika	Dengue	NaN	NaN	NaN
Zika / Dengue	A0A0B4J231;B9A064	A0A0B4J231;B9A064	0.270695	0.270695	0.0004614	0.000501575	244	A0A0B4J231;B9A064	IGLL5	Immunoglobulin lambda-like polypeptide 5	A0A0B4J231_HUMAN;IGLL5_HUMAN	9	20.6389	1.20639	Zika	Dengue	NaN	NaN	NaN
Zika / Dengue	A0A075B6I0	A0A075B6I0	-0.478956	0.478956	0.000488757	0.000528525	242	A0A075B6I0	IGLV8-61	Immunoglobulin lambda variable 8-61	LV861_HUMAN	4	-28.2503	0.717497	Zika	Dengue	NaN	NaN	NaN
Zika / Dengue	Q02985;Q02985-2	Q02985;Q02985-2	-0.654027	0.654027	0.000560638	0.000594954	124	Q02985;Q02985-2	CFHR3	Complement factor H-related protein 3;Isoform 2 of Complement factor H-related protein 3	FHR3_HUMAN	3	-36.4496	0.635504	Zika	Dengue	NaN	NaN	NaN
Zika / Dengue	A0A0B4J2H0	A0A0B4J2H0	-0.466926	0.466926	0.00058831	0.000615925	244	A0A0B4J2H0	IGHV1-69D	Immunoglobulin heavy variable 1-69D	HV69D_HUMAN	5	-27.6495	0.723505	Zika	Dengue	NaN	NaN	NaN
Zika / Dengue	O00187	O00187	-0.275209	0.275209	0.000644036	0.00066837	208	O00187	MASP2	Mannan-binding lectin serine protease 2	MASP2_HUMAN	12	-17.3669	0.826331	Zika	Dengue	NaN	NaN	NaN
Zika / Dengue	P01743	P01743	-0.281054	0.281054	0.000672856	0.000694779	234	P01743	IGHV1-46	Immunoglobulin heavy variable 1-46	HV146_HUMAN	1	-17.7011	0.822989	Zika	Dengue	NaN	NaN	NaN
Zika / Dengue	Q08830	Q08830	-0.412102	0.412102	0.000682911	0.000703398	82	Q08830	FGL1	Fibrinogen-like protein 1	FGL1_HUMAN	10	-24.8473	0.751527	Zika	Dengue	NaN	NaN	NaN
Zika / Dengue	P01780	P01780	0.350339	0.350339	0.000744829	0.000757703	240	P01780	IGHV3-7	Immunoglobulin heavy variable 3-7	HV307_HUMAN	8	27.486	1.27486	Zika	Dengue	NaN	NaN	NaN
Zika / Dengue	P48740	P48740	0.411307	0.411307	0.000765948	0.000773458	244	P48740	MASP1	Mannan-binding lectin serine protease 1	MASP1_HUMAN	24	32.989	1.32989	Zika	Dengue	NaN	NaN	NaN
Zika / Dengue	P05362	P05362	-0.556067	0.556067	0.000812366	0.000814342	32	P05362	ICAM1	Intercellular adhesion molecule 1	ICAM1_HUMAN	9	-31.9846	0.680154	Zika	Dengue	NaN	NaN	NaN
Zika / Dengue	P01008	P01008	-0.131923	0.131923	0.000839458	0.000837425	244	P01008	SERPINC1	Antithrombin-III	ANT3_HUMAN	47	-8.73861	0.912614	Zika	Dengue	NaN	NaN	NaN
Zika / Dengue	A0A075B6P5;P01615	A0A075B6P5;P01615	-0.286911	0.286911	0.000861502	0.000855274	240	A0A075B6P5;P01615	IGKV2-28;IGKV2D-28	Immunoglobulin kappa variable 2-28;Immunoglobulin kappa variable 2D-28	KV228_HUMAN;KVD28_HUMAN	1	-18.0345	0.819655	Zika	Dengue	NaN	NaN	NaN
Zika / Dengue	A0A0J9YX35	A0A0J9YX35	0.349659	0.349659	0.000864576	0.000856262	244	A0A0J9YX35	IGHV3-64D	Immunoglobulin heavy variable 3-64D	HV64D_HUMAN	3	27.4259	1.27426	Zika	Dengue	NaN	NaN	NaN
Zika / Dengue	J3KNB4;P49913	J3KNB4;P49913	-0.678411	0.678411	0.000887896	0.000877249	140	J3KNB4;P49913	CAMP	Cathelicidin antimicrobial peptide	J3KNB4_HUMAN;CAMP_HUMAN	6	-37.5147	0.624853	Zika	Dengue	NaN	NaN	NaN
Zika / Dengue	P32119	P32119	0.96203	0.96203	0.000927104	0.000899962	220	P32119	PRDX2	Peroxiredoxin-2	PRDX2_HUMAN	13	94.8049	1.94805	Zika	Dengue	NaN	NaN	NaN
Zika / Dengue	A0A087WSY5;Q96IY4	A0A087WSY5;Q96IY4	0.221775	0.221775	0.000928217	0.000899962	244	A0A087WSY5;Q96IY4	CPB2	Carboxypeptidase B2	A0A087WSY5_HUMAN;CBPB2_HUMAN	11	16.6167	1.16617	Zika	Dengue	NaN	NaN	NaN
Zika / Dengue	A0A0B4J2D9;P0DP09	A0A0B4J2D9;P0DP09	0.615475	0.615475	0.000942311	0.000909995	218	A0A0B4J2D9;P0DP09	IGKV1D-13;IGKV1-13	Immunoglobulin kappa variable 1D-13;Immunoglobulin kappa variable 1-13	KVD13_HUMAN;KV113_HUMAN	3	53.2063	1.53206	Zika	Dengue	NaN	NaN	NaN
Zika / Dengue	Q86UX7;Q86UX7-2	Q86UX7;Q86UX7-2	-0.493487	0.493487	0.000943126	0.000909995	38	Q86UX7;Q86UX7-2	FERMT3	Fermitin family homolog 3;Isoform 2 of Fermitin family homolog 3	URP2_HUMAN	5	-28.9694	0.710306	Zika	Dengue	NaN	NaN	NaN
Zika / Dengue	P01833	P01833	-0.529168	0.529168	0.000952361	0.000916645	224	P01833	PIGR	Polymeric immunoglobulin receptor	PIGR_HUMAN	17	-30.7046	0.692954	Zika	Dengue	NaN	NaN	NaN
Zika / Dengue	G3XAP6;P49747	G3XAP6;P49747	-0.337601	0.337601	0.000980564	0.000933008	202	G3XAP6;P49747	COMP	Cartilage oligomeric matrix protein	G3XAP6_HUMAN;COMP_HUMAN	16	-20.8644	0.791356	Zika	Dengue	NaN	NaN	NaN
Zika / Dengue	P02652;V9GYM3	P02652;V9GYM3	0.23152	0.23152	0.000986001	0.00093602	244	P02652;V9GYM3	APOA2	Apolipoprotein A-II	APOA2_HUMAN;V9GYM3_HUMAN	12	17.4071	1.17407	Zika	Dengue	NaN	NaN	NaN
Zika / Dengue	Q08211	Q08211	-0.368643	0.368643	0.00107373	0.0010123	210	Q08211	DHX9	ATP-dependent RNA helicase A	DHX9_HUMAN	2	-22.549	0.77451	Zika	Dengue	NaN	NaN	NaN
Zika / Dengue	A0A0A0MS14	A0A0A0MS14	-0.218142	0.218142	0.00111551	0.00104691	244	A0A0A0MS14	IGHV1-45	Immunoglobulin heavy variable 1-45	HV145_HUMAN	3	-14.0328	0.859672	Zika	Dengue	NaN	NaN	NaN
Zika / Dengue	P10153	P10153	-1.01104	1.01104	0.00112864	0.00105588	34	P10153	RNASE2	Non-secretory ribonuclease	RNAS2_HUMAN	2	-50.3811	0.496189	Zika	Dengue	NaN	NaN	NaN
Zika / Dengue	A0A075B6R2	A0A075B6R2	-0.294638	0.294638	0.00114209	0.00106457	244	A0A075B6R2	IGHV4-4	Immunoglobulin heavy variable 4-4	HV404_HUMAN	8	-18.4723	0.815277	Zika	Dengue	NaN	NaN	NaN
Zika / Dengue	P01011	P01011	-0.245761	0.245761	0.00138405	0.00127	244	P01011	SERPINA3	Alpha-1-antichymotrypsin	AACT_HUMAN	39	-15.6629	0.843371	Zika	Dengue	NaN	NaN	NaN
Zika / Dengue	P18428	P18428	-0.284045	0.284045	0.00148561	0.00135414	244	P18428	LBP	Lipopolysaccharide-binding protein	LBP_HUMAN	18	-17.8715	0.821285	Zika	Dengue	NaN	NaN	NaN
Zika / Dengue	P61769	P61769	-0.368577	0.368577	0.00149709	0.00136031	238	P61769	B2M	Beta-2-microglobulin	B2MG_HUMAN	6	-22.5454	0.774546	Zika	Dengue	NaN	NaN	NaN
Zika / Dengue	P33908	P33908	-0.188187	0.188187	0.00157857	0.00142625	140	P33908	MAN1A1	Mannosyl-oligosaccharide 1,2-alpha-mannosidase IA	MA1A1_HUMAN	8	-12.2292	0.877708	Zika	Dengue	NaN	NaN	NaN
Zika / Dengue	P04217	P04217	0.169523	0.169523	0.00159112	0.00143172	244	P04217	A1BG	Alpha-1B-glycoprotein	A1BG_HUMAN	34	12.4687	1.12469	Zika	Dengue	NaN	NaN	NaN
Zika / Dengue	P01042-2	P01042-2	0.536859	0.536859	0.00160278	0.00143554	244	P01042-2	KNG1	Isoform LMW of Kininogen-1	KNG1_HUMAN	6	45.081	1.45081	Zika	Dengue	NaN	NaN	NaN
Zika / Dengue	Q96PD5	Q96PD5	0.0712684	0.0712684	0.00161346	0.00144197	244	Q96PD5	PGLYRP2	N-acetylmuramoyl-L-alanine amidase	PGRP2_HUMAN	33	5.064	1.05064	Zika	Dengue	NaN	NaN	NaN
Zika / Dengue	P05062	P05062	-2.87614	2.87614	0.00178467	0.00158126	46	P05062	ALDOB	Fructose-bisphosphate aldolase B	ALDOB_HUMAN	11	-86.3794	0.136206	Zika	Dengue	NaN	NaN	NaN
Zika / Dengue	P08246	P08246	-0.846959	0.846959	0.00182192	0.00161079	90	P08246	ELANE	Neutrophil elastase	ELNE_HUMAN	6	-44.4045	0.555955	Zika	Dengue	NaN	NaN	NaN
Zika / Dengue	O15439;O15439-2;O15439-3;O15439-4	O15439;O15439-2;O15439-3;O15439-4	-0.279723	0.279723	0.00212064	0.00183551	174	O15439;O15439-2;O15439-3;O15439-4	ABCC4	Multidrug resistance-associated protein 4;Isoform 2 of Multidrug resistance-associated protein 4;Isoform 3 of Multidrug resistance-associated protein 4;Isoform 4 of Multidrug resistance-associated protein 4	MRP4_HUMAN	1	-17.6251	0.823749	Zika	Dengue	NaN	NaN	NaN
Zika / Dengue	F5GX41;F5GXY9;P12318;P12318-2;V9GY83	F5GX41;F5GXY9;P12318;P12318-2;V9GY83	-1.12564	1.12564	0.00220552	0.00190498	64	F5GX41;F5GXY9;P12318;P12318-2;V9GY83	FCGR2A	Low affinity immunoglobulin gamma Fc region receptor II-a;Low affinity immunoglobulin gamma Fc region receptor II-a;Low affinity immunoglobulin gamma Fc region receptor II-a;Isoform 2 of Low affinity immunoglobulin gamma Fc region receptor II-a;Low affinity immunoglobulin gamma Fc region receptor II-a (Fragment)	F5GX41_HUMAN;F5GXY9_HUMAN;FCG2A_HUMAN;FCG2A_HUMAN;V9GY83_HUMAN	2	-54.17	0.4583	Zika	Dengue	NaN	NaN	NaN
Zika / Dengue	P01619	P01619	0.249734	0.249734	0.00238831	0.0020457	244	P01619	IGKV3-20	Immunoglobulin kappa variable 3-20	KV320_HUMAN	6	18.8988	1.18899	Zika	Dengue	NaN	NaN	NaN
Zika / Dengue	G3XAK1;P26927	G3XAK1;P26927	-0.209118	0.209118	0.00247327	0.002101	242	G3XAK1;P26927	MST1	Hepatocyte growth factor-like protein	G3XAK1_HUMAN;HGFL_HUMAN	34	-13.4934	0.865066	Zika	Dengue	NaN	NaN	NaN
Zika / Dengue	A0A0B4J2B5	A0A0B4J2B5	-0.235592	0.235592	0.00253385	0.00213924	244	A0A0B4J2B5	IGHV3OR16-9	Immunoglobulin heavy variable 3/OR16-9 (non-functional) (Fragment)	A0A0B4J2B5_HUMAN	1	-15.0664	0.849336	Zika	Dengue	NaN	NaN	NaN
Zika / Dengue	P01593;P01594	P01593;P01594	-0.188303	0.188303	0.00259469	0.00217279	244	P01593;P01594	IGKV1D-33;IGKV1-33	Immunoglobulin kappa variable 1D-33;Immunoglobulin kappa variable 1-33	KVD33_HUMAN;KV133_HUMAN	4	-12.2362	0.877638	Zika	Dengue	NaN	NaN	NaN
Zika / Dengue	Q9BUN1	Q9BUN1	0.45925	0.45925	0.00261202	0.00218286	58	Q9BUN1	MENT	Protein MENT	MENT_HUMAN	3	37.4827	1.37483	Zika	Dengue	NaN	NaN	NaN
Zika / Dengue	P23142-4	P23142-4	-0.272125	0.272125	0.00265819	0.00220802	244	P23142-4	FBLN1	Isoform C of Fibulin-1	FBLN1_HUMAN	10	-17.1901	0.828099	Zika	Dengue	NaN	NaN	NaN
Zika / Dengue	P34096	P34096	-0.795664	0.795664	0.00295918	0.00242382	50	P34096	RNASE4	Ribonuclease 4	RNAS4_HUMAN	5	-42.3922	0.576078	Zika	Dengue	NaN	NaN	NaN
Zika / Dengue	O00391	O00391	-0.188902	0.188902	0.00303459	0.00248066	242	O00391	QSOX1	Sulfhydryl oxidase 1	QSOX1_HUMAN	24	-12.2727	0.877273	Zika	Dengue	NaN	NaN	NaN
Zika / Dengue	P04430	P04430	-0.179549	0.179549	0.00320745	0.00261442	238	P04430	IGKV1-16	Immunoglobulin kappa variable 1-16	KV116_HUMAN	3	-11.7021	0.882979	Zika	Dengue	NaN	NaN	NaN
Zika / Dengue	P13645	P13645	-2.48597	2.48597	0.0032466	0.00263826	18	P13645	KRT10	Keratin, type I cytoskeletal 10	K1C10_HUMAN	21	-82.1496	0.178504	Zika	Dengue	NaN	NaN	NaN
Zika / Dengue	O14791;O14791-2	O14791;O14791-2	0.175261	0.175261	0.00335899	0.00271886	244	O14791;O14791-2	APOL1	Apolipoprotein L1;Isoform 2 of Apolipoprotein L1	APOL1_HUMAN	26	12.9169	1.12917	Zika	Dengue	NaN	NaN	NaN
Zika / Dengue	A0A0C4DH35	A0A0C4DH35	-0.218973	0.218973	0.00342009	0.0027629	244	A0A0C4DH35	IGHV3-35	Immunoglobulin heavy variable 3-35 (non-functional) (Fragment)	A0A0C4DH35_HUMAN	3	-14.0823	0.859177	Zika	Dengue	NaN	NaN	NaN
Zika / Dengue	B0YIW2;P02656	B0YIW2;P02656	0.277312	0.277312	0.0034688	0.00278586	244	B0YIW2;P02656	APOC3	Apolipoprotein C-III	B0YIW2_HUMAN;APOC3_HUMAN	6	21.1935	1.21193	Zika	Dengue	NaN	NaN	NaN
Zika / Dengue	A0A0B4J1R6;P29401;P29401-2	A0A0B4J1R6;P29401;P29401-2	-3.25319	3.25319	0.00359013	0.00286654	72	A0A0B4J1R6;P29401;P29401-2	TKT	Transketolase;Transketolase;Isoform 2 of Transketolase	A0A0B4J1R6_HUMAN;TKT_HUMAN;TKT_HUMAN	9	-89.512	0.10488	Zika	Dengue	NaN	NaN	NaN
Zika / Dengue	P55290;P55290-4	P55290;P55290-4	-0.31507	0.31507	0.00360884	0.0028759	186	P55290;P55290-4	CDH13	Cadherin-13;Isoform 4 of Cadherin-13	CAD13_HUMAN	5	-19.6188	0.803812	Zika	Dengue	NaN	NaN	NaN
Zika / Dengue	P07737	P07737	0.385997	0.385997	0.00362498	0.00288319	152	P07737	PFN1	Profilin-1	PROF1_HUMAN	10	30.6763	1.30676	Zika	Dengue	NaN	NaN	NaN
Zika / Dengue	P00742	P00742	-0.134725	0.134725	0.00376498	0.00298303	244	P00742	F10	Coagulation factor X	FA10_HUMAN	21	-8.91563	0.910844	Zika	Dengue	NaN	NaN	NaN
Zika / Dengue	P14780	P14780	-0.520458	0.520458	0.00415579	0.00325511	146	P14780	MMP9	Matrix metalloproteinase-9	MMP9_HUMAN	14	-30.2849	0.697151	Zika	Dengue	NaN	NaN	NaN
Zika / Dengue	P04406	P04406	0.490944	0.490944	0.0042066	0.00328865	92	P04406	GAPDH	Glyceraldehyde-3-phosphate dehydrogenase	G3P_HUMAN	11	40.5364	1.40536	Zika	Dengue	NaN	NaN	NaN
Zika / Dengue	A0A0J9YVT0;P0DP02	A0A0J9YVT0;P0DP02	-0.220551	0.220551	0.00423539	0.00330489	244	A0A0J9YVT0;P0DP02	IGHV3-33;IGHV3-30-3	Immunoglobulin heavy variable 3-33 (Fragment);Immunoglobulin heavy variable 3-30-3	A0A0J9YVT0_HUMAN;HVC33_HUMAN	12	-14.1762	0.858238	Zika	Dengue	NaN	NaN	NaN
Zika / Dengue	A0A087WZR4;H0Y4U3;M9MML6;O75015	A0A087WZR4;H0Y4U3;M9MML6;O75015	-0.700942	0.700942	0.00431665	0.00335558	36	A0A087WZR4;H0Y4U3;M9MML6;O75015	FCGR3B	Low affinity immunoglobulin gamma Fc region receptor III-B;Low affinity immunoglobulin gamma Fc region receptor III-B (Fragment);Low affinity immunoglobulin gamma Fc region receptor III-B;Low affinity immunoglobulin gamma Fc region receptor III-B	A0A087WZR4_HUMAN;H0Y4U3_HUMAN;M9MML6_HUMAN;FCG3B_HUMAN	3	-38.483	0.61517	Zika	Dengue	NaN	NaN	NaN
Zika / Dengue	P0DP08	P0DP08	-0.589893	0.589893	0.00441789	0.00342137	36	P0DP08	IGHV4-38-2	Immunoglobulin heavy variable 4-38-2	HVD82_HUMAN	2	-33.5608	0.664392	Zika	Dengue	NaN	NaN	NaN
Zika / Dengue	P16930;P16930-2	P16930;P16930-2	-4.23765	4.23765	0.0045696	0.00353222	34	P16930;P16930-2	FAH	Fumarylacetoacetase;Isoform 2 of Fumarylacetoacetase	FAAA_HUMAN	4	-94.6992	0.0530079	Zika	Dengue	NaN	NaN	NaN
Zika / Dengue	M0R3C9;Q9UM47	M0R3C9;Q9UM47	-1.44553	1.44553	0.00476116	0.00364609	24	M0R3C9;Q9UM47	NOTCH3	Neurogenic locus notch homolog protein 3 (Fragment);Neurogenic locus notch homolog protein 3	M0R3C9_HUMAN;NOTC3_HUMAN	3	-63.2843	0.367157	Zika	Dengue	NaN	NaN	NaN
Zika / Dengue	A0A140TA29	A0A140TA29	1.38884	1.38884	0.00487837	0.00372892	44	A0A140TA29	C4B	Complement C4-B	A0A140TA29_HUMAN	1	161.868	2.61868	Zika	Dengue	NaN	NaN	NaN
Zika / Dengue	P39060;P39060-1;P39060-2	P39060;P39060-1;P39060-2	0.00499881	0.00499881	0.00498565	0.00380386	34	P39060;P39060-1;P39060-2	COL18A1	Collagen alpha-1(XVIII) chain;Isoform 2 of Collagen alpha-1(XVIII) chain;Isoform 3 of Collagen alpha-1(XVIII) chain	COIA1_HUMAN	7	0.347092	1.00347	Zika	Dengue	NaN	NaN	NaN
Zika / Dengue	E9PFZ2	E9PFZ2	-0.000816454	0.000816454	0.00513365	0.00388798	192	E9PFZ2	CP	Ceruloplasmin	E9PFZ2_HUMAN	2	-0.0565763	0.999434	Zika	Dengue	NaN	NaN	NaN
Zika / Dengue	P06396	P06396	0.106623	0.106623	0.00517346	0.00390378	244	P06396	GSN	Gelsolin	GELS_HUMAN	65	7.67048	1.0767	Zika	Dengue	NaN	NaN	NaN
Zika / Dengue	P02753;Q5VY30	P02753;Q5VY30	0.226037	0.226037	0.00537561	0.00404152	244	P02753;Q5VY30	RBP4	Retinol-binding protein 4;Retinol binding protein 4, plasma, isoform CRA_b	RET4_HUMAN;Q5VY30_HUMAN	19	16.9618	1.16962	Zika	Dengue	NaN	NaN	NaN
Zika / Dengue	P07360	P07360	-0.121777	0.121777	0.00553649	0.00415489	244	P07360	C8G	Complement component C8 gamma chain	CO8G_HUMAN	13	-8.09453	0.919055	Zika	Dengue	NaN	NaN	NaN
Zika / Dengue	P03951;P03951-2	P03951;P03951-2	0.432861	0.432861	0.00596505	0.0044043	190	P03951;P03951-2	F11	Coagulation factor XI;Isoform 2 of Coagulation factor XI	FA11_HUMAN	17	34.9908	1.34991	Zika	Dengue	NaN	NaN	NaN
Zika / Dengue	P02751;P02751-15;P02751-3;P02751-7	P02751;P02751-15;P02751-3;P02751-7	-0.16791	0.16791	0.00688364	0.00498429	244	P02751;P02751-15;P02751-3;P02751-7	FN1	Fibronectin;Isoform 15 of Fibronectin;Isoform 3 of Fibronectin;Isoform 7 of Fibronectin	FINC_HUMAN	142	-10.9869	0.890131	Zika	Dengue	NaN	NaN	NaN
Zika / Dengue	A0A075B6H9	A0A075B6H9	0.467459	0.467459	0.00727774	0.00523882	236	A0A075B6H9	IGLV4-69	Immunoglobulin lambda variable 4-69	LV469_HUMAN	5	38.2672	1.38267	Zika	Dengue	NaN	NaN	NaN
Zika / Dengue	P01601	P01601	-0.63375	0.63375	0.00745856	0.00534422	232	P01601	IGKV1D-16	Immunoglobulin kappa variable 1D-16 (Fragment)	KVD16_HUMAN	2	-35.5501	0.644499	Zika	Dengue	NaN	NaN	NaN
Zika / Dengue	Q92496;Q92496-2	Q92496;Q92496-2	-0.259856	0.259856	0.00792793	0.00559299	236	Q92496;Q92496-2	CFHR4	Complement factor H-related protein 4;Isoform 2 of Complement factor H-related protein 4	FHR4_HUMAN	12	-16.4828	0.835172	Zika	Dengue	NaN	NaN	NaN
Zika / Dengue	P01860	P01860	-0.270957	0.270957	0.00802139	0.00563961	244	P01860	IGHG3	Immunoglobulin heavy constant gamma 3	IGHG3_HUMAN	25	-17.123	0.82877	Zika	Dengue	NaN	NaN	NaN
Zika / Dengue	A0A075B6K2	A0A075B6K2	0.890806	0.890806	0.00822176	0.00575105	50	A0A075B6K2	IGLV3-12	Immunoglobulin lambda variable 3-12	LV312_HUMAN	2	85.4211	1.85421	Zika	Dengue	NaN	NaN	NaN
Zika / Dengue	P01597;P04432	P01597;P04432	-0.417292	0.417292	0.00844142	0.00588471	218	P01597;P04432	IGKV1-39;IGKV1D-39	Immunoglobulin kappa variable 1-39;Immunoglobulin kappa variable 1D-39	KV139_HUMAN;KVD39_HUMAN	3	-25.1171	0.748829	Zika	Dengue	NaN	NaN	NaN
Zika / Dengue	A0A087X0Q4	A0A087X0Q4	0.230841	0.230841	0.00851274	0.00592441	244	A0A087X0Q4	IGKV2-40	Immunoglobulin kappa variable 2-40	A0A087X0Q4_HUMAN	7	17.3518	1.17352	Zika	Dengue	NaN	NaN	NaN
Zika / Dengue	A0A0C4DH43	A0A0C4DH43	0.250264	0.250264	0.00913451	0.00627819	242	A0A0C4DH43	IGHV2-70D	Immunoglobulin heavy variable 2-70D	HV70D_HUMAN	10	18.9425	1.18943	Zika	Dengue	NaN	NaN	NaN
Zika / Dengue	Q99969	Q99969	-0.56426	0.56426	0.0094492	0.00644548	48	Q99969	RARRES2	Retinoic acid receptor responder protein 2	RARR2_HUMAN	4	-32.3698	0.676302	Zika	Dengue	NaN	NaN	NaN
Zika / Dengue	Q15848	Q15848	-0.163765	0.163765	0.00979446	0.00665894	212	Q15848	ADIPOQ	Adiponectin	ADIPO_HUMAN	5	-10.7308	0.892692	Zika	Dengue	NaN	NaN	NaN
Zika / Dengue	O43866	O43866	0.278012	0.278012	0.00985849	0.00669143	244	O43866	CD5L	CD5 antigen-like	CD5L_HUMAN	21	21.2523	1.21252	Zika	Dengue	NaN	NaN	NaN
Zika / Dengue	P43652	P43652	0.231667	0.231667	0.0103994	0.00701723	244	P43652	AFM	Afamin	AFAM_HUMAN	59	17.4191	1.17419	Zika	Dengue	NaN	NaN	NaN
Zika / Dengue	P13671	P13671	-0.105068	0.105068	0.0109004	0.00730238	244	P13671	C6	Complement component C6	CO6_HUMAN	63	-7.02391	0.929761	Zika	Dengue	NaN	NaN	NaN
Zika / Dengue	E7EUF1;Q13822;Q13822-2;Q13822-3	E7EUF1;Q13822;Q13822-2;Q13822-3	-0.314953	0.314953	0.0109447	0.00732013	82	E7EUF1;Q13822;Q13822-2;Q13822-3	ENPP2	Ectonucleotide pyrophosphatase/phosphodiesterase family member 2;Ectonucleotide pyrophosphatase/phosphodiesterase family member 2;Isoform 2 of Ectonucleotide pyrophosphatase/phosphodiesterase family member 2;Isoform 3 of Ectonucleotide pyrophosphatase/phosphodiesterase family member 2	E7EUF1_HUMAN;ENPP2_HUMAN;ENPP2_HUMAN;ENPP2_HUMAN	12	-19.6123	0.803877	Zika	Dengue	NaN	NaN	NaN
Zika / Dengue	P01762	P01762	-0.469464	0.469464	0.0111974	0.0074289	228	P01762	IGHV3-11	Immunoglobulin heavy variable 3-11	HV311_HUMAN	3	-27.7767	0.722233	Zika	Dengue	NaN	NaN	NaN
Zika / Dengue	J3QQR8;J3QQX6;J3QRQ1;P13598	J3QQR8;J3QQX6;J3QRQ1;P13598	-0.422199	0.422199	0.011461	0.00754304	152	J3QQR8;J3QQX6;J3QRQ1;P13598	ICAM2	Intercellular adhesion molecule 2 (Fragment);Intercellular adhesion molecule 2 (Fragment);Intercellular adhesion molecule 2 (Fragment);Intercellular adhesion molecule 2	J3QQR8_HUMAN;J3QQX6_HUMAN;J3QRQ1_HUMAN;ICAM2_HUMAN	4	-25.3714	0.746286	Zika	Dengue	NaN	NaN	NaN
Zika / Dengue	P05534;P30447	P05534;P30447	-0.300412	0.300412	0.0126112	0.00824733	172	P05534;P30447	HLA-A	HLA class I histocompatibility antigen, A-24 alpha chain;HLA class I histocompatibility antigen, A-23 alpha chain	1A24_HUMAN;1A23_HUMAN	9	-18.798	0.81202	Zika	Dengue	NaN	NaN	NaN
Zika / Dengue	Q5VZR0;Q9H4G4	Q5VZR0;Q9H4G4	-0.885656	0.885656	0.0128406	0.00838403	42	Q5VZR0;Q9H4G4	GLIPR2	Golgi-associated plant pathogenesis-related protein 1	Q5VZR0_HUMAN;GAPR1_HUMAN	3	-45.8759	0.541241	Zika	Dengue	NaN	NaN	NaN
Zika / Dengue	P12955	P12955	-0.236726	0.236726	0.0142665	0.00919845	106	P12955	PEPD	Xaa-Pro dipeptidase	PEPD_HUMAN	10	-15.1331	0.848669	Zika	Dengue	NaN	NaN	NaN
Zika / Dengue	P00915	P00915	0.424725	0.424725	0.0151686	0.00971924	198	P00915	CA1	Carbonic anhydrase 1	CAH1_HUMAN	9	34.2317	1.34232	Zika	Dengue	NaN	NaN	NaN
Zika / Dengue	P01766	P01766	-0.136537	0.136537	0.0153825	0.0098105	244	P01766	IGHV3-13	Immunoglobulin heavy variable 3-13	HV313_HUMAN	3	-9.03	0.9097	Zika	Dengue	NaN	NaN	NaN
Zika / Dengue	E7ENL6;P12111;P12111-2;P12111-4	E7ENL6;P12111;P12111-2;P12111-4	-0.20392	0.20392	0.01571	0.0100039	82	E7ENL6;P12111;P12111-2;P12111-4	COL6A3	Collagen alpha-3(VI) chain;Collagen alpha-3(VI) chain;Isoform 2 of Collagen alpha-3(VI) chain;Isoform 4 of Collagen alpha-3(VI) chain	E7ENL6_HUMAN;CO6A3_HUMAN;CO6A3_HUMAN;CO6A3_HUMAN	22	-13.1811	0.868189	Zika	Dengue	NaN	NaN	NaN
Zika / Dengue	P02751-14;P02751-8	P02751-14;P02751-8	-0.253216	0.253216	0.0157649	0.0100234	240	P02751-14;P02751-8	FN1	Isoform 14 of Fibronectin;Isoform 8 of Fibronectin	FINC_HUMAN	1	-16.0976	0.839024	Zika	Dengue	NaN	NaN	NaN
Zika / Dengue	A0A0B4J1X5	A0A0B4J1X5	-0.115495	0.115495	0.0159139	0.0100869	244	A0A0B4J1X5	IGHV3-74	Immunoglobulin heavy variable 3-74	HV374_HUMAN	7	-7.69342	0.923066	Zika	Dengue	NaN	NaN	NaN
Zika / Dengue	A0A0G2JMB2	A0A0G2JMB2	0.245022	0.245022	0.0161398	0.0102145	242	A0A0G2JMB2	IGHA2	Immunoglobulin heavy constant alpha 2 (Fragment)	A0A0G2JMB2_HUMAN	27	18.5111	1.18511	Zika	Dengue	NaN	NaN	NaN
Zika / Dengue	Q9NPH3;Q9NPH3-2;Q9NPH3-5	Q9NPH3;Q9NPH3-2;Q9NPH3-5	-0.31603	0.31603	0.0164504	0.0103637	154	Q9NPH3;Q9NPH3-2;Q9NPH3-5	IL1RAP	Interleukin-1 receptor accessory protein;Isoform 2 of Interleukin-1 receptor accessory protein;Isoform 4 of Interleukin-1 receptor accessory protein	IL1AP_HUMAN	6	-19.6723	0.803277	Zika	Dengue	NaN	NaN	NaN
Zika / Dengue	E7EX60;E9PEP6;O14786;O14786-2;O14786-3;Q5JWQ6;Q5T7F0	E7EX60;E9PEP6;O14786;O14786-2;O14786-3;Q5JWQ6;Q5T7F0	-0.188386	0.188386	0.0164533	0.0103637	104	E7EX60;E9PEP6;O14786;O14786-2;O14786-3;Q5JWQ6;Q5T7F0	NRP1	Neuropilin-1;Neuropilin;Neuropilin-1;Isoform 2 of Neuropilin-1;Isoform 3 of Neuropilin-1;Neuropilin;Neuropilin	E7EX60_HUMAN;E9PEP6_HUMAN;NRP1_HUMAN;NRP1_HUMAN;NRP1_HUMAN;Q5JWQ6_HUMAN;Q5T7F0_HUMAN	3	-12.2413	0.877587	Zika	Dengue	NaN	NaN	NaN
Zika / Dengue	P06733	P06733	-1.41223	1.41223	0.0164763	0.0103637	36	P06733	ENO1	Alpha-enolase	ENOA_HUMAN	15	-62.427	0.37573	Zika	Dengue	NaN	NaN	NaN
Zika / Dengue	P0DJI9	P0DJI9	-0.261261	0.261261	0.0167749	0.0105355	170	P0DJI9	SAA2	Serum amyloid A-2 protein	SAA2_HUMAN	8	-16.5642	0.834358	Zika	Dengue	NaN	NaN	NaN
Zika / Dengue	A0A0C4DH29	A0A0C4DH29	-0.373906	0.373906	0.0171429	0.0107176	210	A0A0C4DH29	IGHV1-3	Immunoglobulin heavy variable 1-3	HV103_HUMAN	3	-22.831	0.77169	Zika	Dengue	NaN	NaN	NaN
Zika / Dengue	A0A0C4DH73;P01611	A0A0C4DH73;P01611	-0.929974	0.929974	0.0184783	0.0114655	244	A0A0C4DH73;P01611	IGKV1-12;IGKV1D-12	Immunoglobulin kappa variable 1-12;Immunoglobulin kappa variable 1D-12	KV112_HUMAN;KVD12_HUMAN	2	-47.5132	0.524868	Zika	Dengue	NaN	NaN	NaN
Zika / Dengue	A0A0C4DGZ8;P07359	A0A0C4DGZ8;P07359	-1.46059	1.46059	0.0188373	0.0116706	118	A0A0C4DGZ8;P07359	GP1BA	Glycoprotein Ib (Platelet), alpha polypeptide;Platelet glycoprotein Ib alpha chain	A0A0C4DGZ8_HUMAN;GP1BA_HUMAN	7	-63.6655	0.363345	Zika	Dengue	NaN	NaN	NaN
Zika / Dengue	A0A075B6H7	A0A075B6H7	-0.25773	0.25773	0.0190169	0.011729	152	A0A075B6H7	IGKV3-7	Immunoglobulin kappa variable 3-7 (non-functional) (Fragment)	A0A075B6H7_HUMAN	1	-16.3597	0.836403	Zika	Dengue	NaN	NaN	NaN
Zika / Dengue	P35579	P35579	-1.69175	1.69175	0.0190138	0.011729	16	P35579	MYH9	Myosin-9	MYH9_HUMAN	6	-69.0449	0.309551	Zika	Dengue	NaN	NaN	NaN
Zika / Dengue	P02774;P02774-3	P02774;P02774-3	-0.108874	0.108874	0.019052	0.0117331	244	P02774;P02774-3	GC	Vitamin D-binding protein;Isoform 3 of Vitamin D-binding protein	VTDB_HUMAN	66	-7.26884	0.927312	Zika	Dengue	NaN	NaN	NaN
Zika / Dengue	A0A0A0MT36	A0A0A0MT36	-0.281217	0.281217	0.0196322	0.0120544	242	A0A0A0MT36	IGKV6D-21	Immunoglobulin kappa variable 6D-21	KVD21_HUMAN	5	-17.7103	0.822897	Zika	Dengue	NaN	NaN	NaN
Zika / Dengue	P02743	P02743	0.130123	0.130123	0.0197682	0.0121198	244	P02743	APCS	Serum amyloid P-component	SAMP_HUMAN	14	9.43874	1.09439	Zika	Dengue	NaN	NaN	NaN
Zika / Dengue	A0A096LPE2	A0A096LPE2	0.215801	0.215801	0.0199993	0.0122432	244	A0A096LPE2	SAA2-SAA4	SAA2-SAA4 readthrough	A0A096LPE2_HUMAN	10	16.1348	1.16135	Zika	Dengue	NaN	NaN	NaN
Zika / Dengue	P07225	P07225	-0.159131	0.159131	0.0209851	0.012752	244	P07225	PROS1	Vitamin K-dependent protein S	PROS_HUMAN	33	-10.4436	0.895564	Zika	Dengue	NaN	NaN	NaN
Zika / Dengue	B7Z6Z4;F8VPF3;F8VZU9;F8W180;F8W1R7;G3V1V0;G3V1Y7;G8JLA2;J3KND3;P60660;P60660-2	B7Z6Z4;F8VPF3;F8VZU9;F8W180;F8W1R7;G3V1V0;G3V1Y7;G8JLA2;J3KND3;P60660;P60660-2	-1.13617	1.13617	0.0212503	0.0128563	14	B7Z6Z4;F8VPF3;F8VZU9;F8W180;F8W1R7;G3V1V0;G3V1Y7;G8JLA2;J3KND3;P60660;P60660-2	MYL6	Myosin light polypeptide 6;Myosin light polypeptide 6 (Fragment);Myosin light polypeptide 6;Myosin light polypeptide 6;Myosin light polypeptide 6;Myosin light polypeptide 6;Myosin light polypeptide 6;Myosin light polypeptide 6;Myosin light polypeptide 6;Myosin light polypeptide 6;Isoform Smooth muscle of Myosin light polypeptide 6	B7Z6Z4_HUMAN;F8VPF3_HUMAN;F8VZU9_HUMAN;F8W180_HUMAN;F8W1R7_HUMAN;G3V1V0_HUMAN;G3V1Y7_HUMAN;G8JLA2_HUMAN;J3KND3_HUMAN;MYL6_HUMAN;MYL6_HUMAN	2	-54.5034	0.454966	Zika	Dengue	NaN	NaN	NaN
Zika / Dengue	P03950	P03950	-0.274228	0.274228	0.0224209	0.013446	112	P03950	ANG	Angiogenin	ANGI_HUMAN	6	-17.3108	0.826892	Zika	Dengue	NaN	NaN	NaN
Zika / Dengue	P01706	P01706	0.282854	0.282854	0.0225924	0.0135291	244	P01706	IGLV2-11	Immunoglobulin lambda variable 2-11	LV211_HUMAN	6	21.6599	1.2166	Zika	Dengue	NaN	NaN	NaN
Zika / Dengue	E7ER44;P02788	E7ER44;P02788	-0.395774	0.395774	0.0229411	0.01367	210	E7ER44;P02788	LTF	Lactotransferrin	E7ER44_HUMAN;TRFL_HUMAN	47	-23.9919	0.760081	Zika	Dengue	NaN	NaN	NaN
Zika / Dengue	P37837	P37837	-1.39374	1.39374	0.0229077	0.01367	44	P37837	TALDO1	Transaldolase	TALDO_HUMAN	4	-61.9422	0.380578	Zika	Dengue	NaN	NaN	NaN
Zika / Dengue	H0Y512;Q9HDC9	H0Y512;Q9HDC9	0.234261	0.234261	0.0239377	0.0141497	202	H0Y512;Q9HDC9	APMAP	Adipocyte plasma membrane-associated protein (Fragment);Adipocyte plasma membrane-associated protein	H0Y512_HUMAN;APMAP_HUMAN	13	17.6304	1.1763	Zika	Dengue	NaN	NaN	NaN
Zika / Dengue	P0C0L5	P0C0L5	0.125625	0.125625	0.0249759	0.0147001	244	P0C0L5	C4B	Complement C4-B	CO4B_HUMAN	170	9.09805	1.09098	Zika	Dengue	NaN	NaN	NaN
Zika / Dengue	P59665;P59666	P59665;P59666	-0.320334	0.320334	0.0257718	0.0150396	240	P59665;P59666	DEFA1;DEFA3	Neutrophil defensin 1;Neutrophil defensin 3	DEF1_HUMAN;DEF3_HUMAN	5	-19.9116	0.800884	Zika	Dengue	NaN	NaN	NaN
Zika / Dengue	P06331	P06331	0.290332	0.290332	0.0262714	0.0152879	244	P06331	IGHV4-34	Immunoglobulin heavy variable 4-34	HV434_HUMAN	5	22.2922	1.22292	Zika	Dengue	NaN	NaN	NaN
Zika / Dengue	P35443	P35443	-0.184937	0.184937	0.0273951	0.0158969	234	P35443	THBS4	Thrombospondin-4	TSP4_HUMAN	13	-12.0313	0.879687	Zika	Dengue	NaN	NaN	NaN
Zika / Dengue	P67936	P67936	0.159244	0.159244	0.0278178	0.0161195	94	P67936	TPM4	Tropomyosin alpha-4 chain	TPM4_HUMAN	11	11.6702	1.1167	Zika	Dengue	NaN	NaN	NaN
Zika / Dengue	J3KPS3;P04075;P04075-2	J3KPS3;P04075;P04075-2	-0.781446	0.781446	0.0278999	0.0161443	66	J3KPS3;P04075;P04075-2	ALDOA	Fructose-bisphosphate aldolase;Fructose-bisphosphate aldolase A;Isoform 2 of Fructose-bisphosphate aldolase A	J3KPS3_HUMAN;ALDOA_HUMAN;ALDOA_HUMAN	8	-41.8217	0.581783	Zika	Dengue	NaN	NaN	NaN
Zika / Dengue	A0A075B6K0	A0A075B6K0	-0.716353	0.716353	0.0280561	0.0161893	140	A0A075B6K0	IGLV3-16	Immunoglobulin lambda variable 3-16	LV316_HUMAN	2	-39.1366	0.608634	Zika	Dengue	NaN	NaN	NaN
Zika / Dengue	P01871	P01871	0.168447	0.168447	0.0290829	0.016665	244	P01871	IGHM	Immunoglobulin heavy constant mu	IGHM_HUMAN	47	12.3848	1.12385	Zika	Dengue	NaN	NaN	NaN
Zika / Dengue	A0A087WSY6	A0A087WSY6	0.416658	0.416658	0.0294094	0.0168287	244	A0A087WSY6	IGKV3D-15	Immunoglobulin kappa variable 3D-15	KVD15_HUMAN	1	33.4832	1.33483	Zika	Dengue	NaN	NaN	NaN
Zika / Dengue	Q9Y6R7	Q9Y6R7	-0.44113	0.44113	0.0295684	0.0168962	244	Q9Y6R7	FCGBP	IgGFc-binding protein	FCGBP_HUMAN	63	-26.3442	0.736558	Zika	Dengue	NaN	NaN	NaN
Zika / Dengue	A0A087WTK0;A0A087WVC6;Q12913	A0A087WTK0;A0A087WVC6;Q12913	-0.358938	0.358938	0.0305644	0.0174124	176	A0A087WTK0;A0A087WVC6;Q12913	PTPRJ	Receptor-type tyrosine-protein phosphatase eta	A0A087WTK0_HUMAN;A0A087WVC6_HUMAN;PTPRJ_HUMAN	7	-22.0262	0.779738	Zika	Dengue	NaN	NaN	NaN
Zika / Dengue	C9JEE0	C9JEE0	-1.48959	1.48959	0.0305986	0.0174124	182	C9JEE0	IGLL1	Immunoglobulin lambda-like polypeptide 1 (Fragment)	C9JEE0_HUMAN	1	-64.3886	0.356114	Zika	Dengue	NaN	NaN	NaN
Zika / Dengue	P08185	P08185	-0.172452	0.172452	0.0313405	0.0177611	242	P08185	SERPINA6	Corticosteroid-binding globulin	CBG_HUMAN	15	-11.2667	0.887333	Zika	Dengue	NaN	NaN	NaN
Zika / Dengue	P01700	P01700	0.171212	0.171212	0.0320981	0.0181405	244	P01700	IGLV1-47	Immunoglobulin lambda variable 1-47	LV147_HUMAN	2	12.6004	1.126	Zika	Dengue	NaN	NaN	NaN
Zika / Dengue	P09871	P09871	-0.0609279	0.0609279	0.0324702	0.0183029	244	P09871	C1S	Complement C1s subcomponent	C1S_HUMAN	44	-4.13527	0.958647	Zika	Dengue	NaN	NaN	NaN
Zika / Dengue	A0A0B4J1V1	A0A0B4J1V1	-0.52901	0.52901	0.0335424	0.018802	36	A0A0B4J1V1	IGHV3-21	Immunoglobulin heavy variable 3-21	HV321_HUMAN	1	-30.697	0.69303	Zika	Dengue	NaN	NaN	NaN
Zika / Dengue	A0A0C4DH72	A0A0C4DH72	0.192155	0.192155	0.0340899	0.0190829	244	A0A0C4DH72	IGKV1-6	Immunoglobulin kappa variable 1-6	KV106_HUMAN	5	14.2469	1.14247	Zika	Dengue	NaN	NaN	NaN
Zika / Dengue	P01834	P01834	0.222279	0.222279	0.0355212	0.01975	244	P01834	IGKC	Immunoglobulin kappa constant	IGKC_HUMAN	21	16.6575	1.16658	Zika	Dengue	NaN	NaN	NaN
Zika / Dengue	P06681	P06681	-0.155553	0.155553	0.0355862	0.0197595	244	P06681	C2	Complement C2	CO2_HUMAN	12	-10.2212	0.897788	Zika	Dengue	NaN	NaN	NaN
Zika / Dengue	P29622	P29622	0.156758	0.156758	0.0370806	0.0205166	244	P29622	SERPINA4	Kallistatin	KAIN_HUMAN	22	11.478	1.11478	Zika	Dengue	NaN	NaN	NaN
Zika / Dengue	Q01459	Q01459	-0.601106	0.601106	0.0387691	0.0212972	42	Q01459	CTBS	Di-N-acetylchitobiase	DIAC_HUMAN	4	-34.0752	0.659248	Zika	Dengue	NaN	NaN	NaN
Zika / Dengue	P04433	P04433	0.154397	0.154397	0.0388565	0.0213168	244	P04433	IGKV3-11	Immunoglobulin kappa variable 3-11	KV311_HUMAN	5	11.2956	1.11296	Zika	Dengue	NaN	NaN	NaN
Zika / Dengue	A0A0C4DH67	A0A0C4DH67	0.0465024	0.0465024	0.0391449	0.0214313	242	A0A0C4DH67	IGKV1-8	Immunoglobulin kappa variable 1-8	KV108_HUMAN	7	3.27581	1.03276	Zika	Dengue	NaN	NaN	NaN
Zika / Dengue	P0DP01	P0DP01	-0.179765	0.179765	0.0392577	0.0214511	36	P0DP01	IGHV1-8	Immunoglobulin heavy variable 1-8	HV108_HUMAN	2	-11.7153	0.882847	Zika	Dengue	NaN	NaN	NaN
Zika / Dengue	P04264	P04264	-1.59495	1.59495	0.0398528	0.0217187	66	P04264	KRT1	Keratin, type II cytoskeletal 1	K2C1_HUMAN	19	-66.8966	0.331034	Zika	Dengue	NaN	NaN	NaN
Zika / Dengue	A0A075B6I9	A0A075B6I9	-0.254798	0.254798	0.0417904	0.022625	198	A0A075B6I9	IGLV7-46	Immunoglobulin lambda variable 7-46	LV746_HUMAN	2	-16.1896	0.838104	Zika	Dengue	NaN	NaN	NaN
Zika / Dengue	A0A075B7B8	A0A075B7B8	-0.269361	0.269361	0.042375	0.0229114	244	A0A075B7B8	IGHV3OR16-12	Immunoglobulin heavy variable 3/OR16-12 (non-functional) (Fragment)	A0A075B7B8_HUMAN	2	-17.0313	0.829687	Zika	Dengue	NaN	NaN	NaN
Zika / Dengue	E7EX29;P63104	E7EX29;P63104	-0.586313	0.586313	0.0430087	0.0231932	56	E7EX29;P63104	YWHAZ	14-3-3 protein zeta/delta (Fragment);14-3-3 protein zeta/delta	E7EX29_HUMAN;1433Z_HUMAN	4	-33.3957	0.666043	Zika	Dengue	NaN	NaN	NaN
Zika / Dengue	H3BMH2;H3BSC1;P62491;P62491-2;Q15907;Q15907-2	H3BMH2;H3BSC1;P62491;P62491-2;Q15907;Q15907-2	0.342408	0.342408	0.0434987	0.0233657	48	H3BMH2;H3BSC1;P62491;P62491-2;Q15907;Q15907-2	RAB11A;RAB11A;RAB11A;RAB11A;RAB11B;RAB11B	Ras-related protein Rab-11A (Fragment);Ras-related protein Rab-11A;Ras-related protein Rab-11A;Isoform 2 of Ras-related protein Rab-11A;Ras-related protein Rab-11B;Isoform 2 of Ras-related protein Rab-11B	H3BMH2_HUMAN;H3BSC1_HUMAN;RB11A_HUMAN;RB11A_HUMAN;RB11B_HUMAN;RB11B_HUMAN	3	26.7871	1.26787	Zika	Dengue	NaN	NaN	NaN
Zika / Dengue	A0A0J9YVY3	A0A0J9YVY3	-0.5383	0.5383	0.0439499	0.0235773	66	A0A0J9YVY3	IGHV7-4-1	Immunoglobulin heavy variable 7-4-1	HV741_HUMAN	2	-31.1418	0.688582	Zika	Dengue	NaN	NaN	NaN
Zika / Dengue	P62937	P62937	0.0695277	0.0695277	0.0457272	0.0244988	162	P62937	PPIA	Peptidyl-prolyl cis-trans isomerase A	PPIA_HUMAN	10	4.93731	1.04937	Zika	Dengue	NaN	NaN	NaN
Zika / Dengue	P01876	P01876	-0.224759	0.224759	0.0471748	0.0251111	242	P01876	IGHA1	Immunoglobulin heavy constant alpha 1	IGHA1_HUMAN	11	-14.4262	0.855738	Zika	Dengue	NaN	NaN	NaN
Zika / Dengue	A0A075B6K6	A0A075B6K6	0.894636	0.894636	0.0474041	0.0252007	28	A0A075B6K6	IGLV4-3	Immunoglobulin lambda variable 4-3	LV403_HUMAN	3	85.9141	1.85914	Zika	Dengue	NaN	NaN	NaN
Zika / Dengue	A0A0J9YW62	A0A0J9YW62	-0.366661	0.366661	0.0490683	0.0259514	126	A0A0J9YW62	NaN	Uncharacterized protein (Fragment)	A0A0J9YW62_HUMAN	1	-22.4424	0.775576	Zika	Dengue	NaN	NaN	NaN
Zika / Dengue	A0A0G2JS06	A0A0G2JS06	-0.151352	0.151352	0.0515829	0.0271074	234	A0A0G2JS06	IGLV5-39	Immunoglobulin lambda variable 5-39	LV539_HUMAN	5	-9.9594	0.900406	Zika	Dengue	NaN	NaN	NaN
Zika / Dengue	P05154	P05154	-0.53322	0.53322	0.052566	0.0275187	96	P05154	SERPINA5	Plasma serine protease inhibitor	IPSP_HUMAN	5	-30.8989	0.691011	Zika	Dengue	NaN	NaN	NaN
Zika / Dengue	P01704	P01704	0.335701	0.335701	0.0528832	0.0275796	194	P01704	IGLV2-14	Immunoglobulin lambda variable 2-14	LV214_HUMAN	1	26.199	1.26199	Zika	Dengue	NaN	NaN	NaN
Zika / Dengue	P11464;P11464-2;P11464-3;P11464-4	P11464;P11464-2;P11464-3;P11464-4	-3.35265	3.35265	0.0562786	0.0292393	10	P11464;P11464-2;P11464-3;P11464-4	PSG1	Pregnancy-specific beta-1-glycoprotein 1;Isoform 2 of Pregnancy-specific beta-1-glycoprotein 1;Isoform 3 of Pregnancy-specific beta-1-glycoprotein 1;Isoform 4 of Pregnancy-specific beta-1-glycoprotein 1	PSG1_HUMAN	9	-90.2107	0.097893	Zika	Dengue	NaN	NaN	NaN
Zika / Dengue	P04114	P04114	0.10691	0.10691	0.0573539	0.0297605	244	P04114	APOB	Apolipoprotein B-100	APOB_HUMAN	367	7.6919	1.07692	Zika	Dengue	NaN	NaN	NaN
Zika / Dengue	P37802;P37802-2;X6RJP6	P37802;P37802-2;X6RJP6	0.174925	0.174925	0.0632055	0.0324753	106	P37802;P37802-2;X6RJP6	TAGLN2	Transgelin-2;Isoform 2 of Transgelin-2;Transgelin-2 (Fragment)	TAGL2_HUMAN;TAGL2_HUMAN;X6RJP6_HUMAN	8	12.8906	1.12891	Zika	Dengue	NaN	NaN	NaN
Zika / Dengue	A0A075B7D0	A0A075B7D0	0.271396	0.271396	0.0632165	0.0324753	244	A0A075B7D0	IGHV1OR15-1	Immunoglobulin heavy variable 1/OR15-1 (non-functional) (Fragment)	A0A075B7D0_HUMAN	3	20.6975	1.20697	Zika	Dengue	NaN	NaN	NaN
Zika / Dengue	A0A140T951;A0A140T9A9;A0A140T9G0;A0A140T9H3;A0A140T9S9;A0A1W2PPR8;P01889;P03989;P18463;P30460;P30461;P30462;P30466;P30475;P30479;P30480;P30481;P30485;Q04826;Q29718;Q29836;Q95365	A0A140T951;A0A140T9A9;A0A140T9G0;A0A140T9H3;A0A140T9S9;A0A1W2PPR8;P01889;P03989;P18463;P30460;P30461;P30462;P30466;P30475;P30479;P30480;P30481;P30485;Q04826;Q29718;Q29836;Q95365	-0.221628	0.221628	0.0645101	0.0330986	26	A0A140T951;A0A140T9A9;A0A140T9G0;A0A140T9H3;A0A140T9S9;A0A1W2PPR8;P01889;P03989;P18463;P30460;P30461;P30462;P30466;P30475;P30479;P30480;P30481;P30485;Q04826;Q29718;Q29836;Q95365	HLA-B	HLA class I histocompatibility antigen, B-46 alpha chain (Fragment);HLA class I histocompatibility antigen, B-46 alpha chain (Fragment);HLA class I histocompatibility antigen, B-46 alpha chain (Fragment);HLA class I histocompatibility antigen, B-46 alpha chain (Fragment);HLA class I histocompatibility antigen, B-46 alpha chain (Fragment);HLA class I histocompatibility antigen, B-46 alpha chain;HL…	A0A140T951_HUMAN;A0A140T9A9_HUMAN;A0A140T9G0_HUMAN;A0A140T9H3_HUMAN;A0A140T9S9_HUMAN;A0A1W2PPR8_HUMAN;1B07_HUMAN;1B27_HUMAN;1B37_HUMAN;1B08_HUMAN;1B13_HUMAN;1B14_HUMAN;1B18_HUMAN;1B39_HUMAN;1B41_HUMAN;1B42_HUMAN;1B44_HUMAN;1B47_HUMAN;1B40_HUMAN;1B82_HUMAN;1B67_HUMAN;1B38_HUMAN	1	-14.2403	0.857597	Zika	Dengue	NaN	NaN	NaN
Zika / Dengue	P01701	P01701	-0.106604	0.106604	0.0649421	0.0332788	244	P01701	IGLV1-51	Immunoglobulin lambda variable 1-51	LV151_HUMAN	6	-7.12282	0.928772	Zika	Dengue	NaN	NaN	NaN
Zika / Dengue	B4DV12;F5GXK7;F5GYU3;F5GZ39;F5H265;F5H2Z3;F5H388;F5H6Q2;F5H747;J3QKN0;J3QS39;J3QSA3;J3QTR3;M0R1V7;P0CG47;P0CG48;P62979;P62987;Q49A90;Q5PY61;Q96C32	B4DV12;F5GXK7;F5GYU3;F5GZ39;F5H265;F5H2Z3;F5H388;F5H6Q2;F5H747;J3QKN0;J3QS39;J3QSA3;J3QTR3;M0R1V7;P0CG47;P0CG48;P62979;P62987;Q49A90;Q5PY61;Q96C32	1.43942	1.43942	0.0660891	0.0338245	10	B4DV12;F5GXK7;F5GYU3;F5GZ39;F5H265;F5H2Z3;F5H388;F5H6Q2;F5H747;J3QKN0;J3QS39;J3QSA3;J3QTR3;M0R1V7;P0CG47;P0CG48;P62979;P62987;Q49A90;Q5PY61;Q96C32	UBB;UBC;UBC;UBC;UBC;UBC;UBC;UBC;UBC;UBB;UBB;UBB;RPS27A;UBA52;UBB;UBC;RPS27A;UBA52;RPS27A;UBC;UBC	Polyubiquitin-B;Polyubiquitin-C (Fragment);Polyubiquitin-C (Fragment);Polyubiquitin-C (Fragment);Polyubiquitin-C (Fragment);Polyubiquitin-C (Fragment);Polyubiquitin-C (Fragment);Polyubiquitin-C (Fragment);Polyubiquitin-C (Fragment);Polyubiquitin-B (Fragment);Polyubiquitin-B (Fragment);Polyubiquitin-B (Fragment);Ubiquitin-40S ribosomal protein S27a (Fragment);Ubiquitin-60S ribosomal protein L40 (F…	B4DV12_HUMAN;F5GXK7_HUMAN;F5GYU3_HUMAN;F5GZ39_HUMAN;F5H265_HUMAN;F5H2Z3_HUMAN;F5H388_HUMAN;F5H6Q2_HUMAN;F5H747_HUMAN;J3QKN0_HUMAN;J3QS39_HUMAN;J3QSA3_HUMAN;J3QTR3_HUMAN;M0R1V7_HUMAN;UBB_HUMAN;UBC_HUMAN;RS27A_HUMAN;RL40_HUMAN;Q49A90_HUMAN;Q5PY61_HUMAN;Q96C32_HUMAN	1	171.212	2.71212	Zika	Dengue	NaN	NaN	NaN
Zika / Dengue	F8WF14;P06276	F8WF14;P06276	0.0876129	0.0876129	0.0708501	0.0359486	238	F8WF14;P06276	BCHE	Carboxylic ester hydrolase;Cholinesterase	F8WF14_HUMAN;CHLE_HUMAN	8	6.26105	1.06261	Zika	Dengue	NaN	NaN	NaN
Zika / Dengue	P02748	P02748	-0.0871279	0.0871279	0.0713784	0.0360967	244	P02748	C9	Complement component C9	CO9_HUMAN	51	-5.8605	0.941395	Zika	Dengue	NaN	NaN	NaN
Zika / Dengue	O75882-2	O75882-2	0.125758	0.125758	0.0734667	0.0370028	244	O75882-2	ATRN	Isoform 2 of Attractin	ATRN_HUMAN	43	9.1081	1.09108	Zika	Dengue	NaN	NaN	NaN
Zika / Dengue	A0A0C4DFP6;Q9NQ79;Q9NQ79-2	A0A0C4DFP6;Q9NQ79;Q9NQ79-2	-0.0451068	0.0451068	0.0738053	0.037128	238	A0A0C4DFP6;Q9NQ79;Q9NQ79-2	CRTAC1	Cartilage acidic protein 1;Cartilage acidic protein 1;Isoform 2 of Cartilage acidic protein 1	A0A0C4DFP6_HUMAN;CRAC1_HUMAN;CRAC1_HUMAN	15	-3.07819	0.969218	Zika	Dengue	NaN	NaN	NaN
Zika / Dengue	P07996	P07996	0.162123	0.162123	0.0751018	0.0376881	238	P07996	THBS1	Thrombospondin-1	TSP1_HUMAN	57	11.8933	1.11893	Zika	Dengue	NaN	NaN	NaN
Zika / Dengue	A0A0B4J1V2	A0A0B4J1V2	-0.00173199	0.00173199	0.0763882	0.0382405	232	A0A0B4J1V2	IGHV2-26	Immunoglobulin heavy variable 2-26	HV226_HUMAN	8	-0.11998	0.9988	Zika	Dengue	NaN	NaN	NaN
Zika / Dengue	P01742	P01742	-0.149954	0.149954	0.0786363	0.0391282	226	P01742	IGHV1-69	Immunoglobulin heavy variable 1-69	HV169_HUMAN	2	-9.87209	0.901279	Zika	Dengue	NaN	NaN	NaN
Zika / Dengue	P62805	P62805	-0.30821	0.30821	0.0798481	0.0396354	72	P62805	HIST1H4A	Histone H4	H4_HUMAN	5	-19.2357	0.807643	Zika	Dengue	NaN	NaN	NaN
Zika / Dengue	P35908	P35908	-1.0468	1.0468	0.0797614	0.0396354	16	P35908	KRT2	Keratin, type II cytoskeletal 2 epidermal	K22E_HUMAN	19	-51.5959	0.484041	Zika	Dengue	NaN	NaN	NaN
Zika / Dengue	Q13790	Q13790	-0.287042	0.287042	0.0821273	0.0407178	192	Q13790	APOF	Apolipoprotein F	APOF_HUMAN	3	-18.0419	0.819581	Zika	Dengue	NaN	NaN	NaN
Zika / Dengue	A6XND0;A6XND1;P17936;P17936-2	A6XND0;A6XND1;P17936;P17936-2	0.0793385	0.0793385	0.0855585	0.0422157	232	A6XND0;A6XND1;P17936;P17936-2	IGFBP3	Insulin-like growth factor-binding protein 3;Insulin-like growth factor binding protein 3 isoform b;Insulin-like growth factor-binding protein 3;Isoform 2 of Insulin-like growth factor-binding protein 3	A6XND0_HUMAN;A6XND1_HUMAN;IBP3_HUMAN;IBP3_HUMAN	11	5.65335	1.05653	Zika	Dengue	NaN	NaN	NaN
Zika / Dengue	P09486	P09486	-1.30292	1.30292	0.0886051	0.043304	174	P09486	SPARC	SPARC	SPRC_HUMAN	10	-59.4694	0.405306	Zika	Dengue	NaN	NaN	NaN
Zika / Dengue	P01602	P01602	-0.0646647	0.0646647	0.0902694	0.0439091	244	P01602	IGKV1-5	Immunoglobulin kappa variable 1-5	KV105_HUMAN	5	-4.38325	0.956168	Zika	Dengue	NaN	NaN	NaN
Zika / Dengue	A0A0C4DH55;A0A0C4DH90	A0A0C4DH55;A0A0C4DH90	0.167354	0.167354	0.0923714	0.0448257	240	A0A0C4DH55;A0A0C4DH90	IGKV3D-7;IGKV3OR2-268	Immunoglobulin kappa variable 3D-7;Immunoglobulin kappa variable 3/OR2-268 (non-functional) (Fragment)	KVD07_HUMAN;A0A0C4DH90_HUMAN	1	12.2997	1.123	Zika	Dengue	NaN	NaN	NaN
Zika / Dengue	A0A075B6Q5	A0A075B6Q5	0.213234	0.213234	0.095627	0.0460261	160	A0A075B6Q5	IGHV3-64	Immunoglobulin heavy variable 3-64	HV364_HUMAN	2	15.9284	1.15928	Zika	Dengue	NaN	NaN	NaN
Zika / Dengue	Q13103	Q13103	-0.143848	0.143848	0.0987243	0.0472958	166	Q13103	SPP2	Secreted phosphoprotein 24	SPP24_HUMAN	4	-9.48979	0.905102	Zika	Dengue	NaN	NaN	NaN
Zika / Dengue	P19823	P19823	0.0594793	0.0594793	0.100758	0.0479357	244	P19823	ITIH2	Inter-alpha-trypsin inhibitor heavy chain H2	ITIH2_HUMAN	58	4.20896	1.04209	Zika	Dengue	NaN	NaN	NaN
Zika / Dengue	P35527	P35527	-1.02634	1.02634	0.105701	0.0499411	16	P35527	KRT9	Keratin, type I cytoskeletal 9	K1C9_HUMAN	10	-50.9045	0.490955	Zika	Dengue	NaN	NaN	NaN
Zika / Dengue	P02649	P02649	0.133727	0.133727	0.107333	0.0505963	244	P02649	APOE	Apolipoprotein E	APOE_HUMAN	37	9.71247	1.09712	Zika	Dengue	NaN	NaN	NaN
Zika / Dengue	P01033;Q5H9A7	P01033;Q5H9A7	-0.57411	0.57411	0.107535	0.0506336	88	P01033;Q5H9A7	TIMP1	Metalloproteinase inhibitor 1	TIMP1_HUMAN;Q5H9A7_HUMAN	3	-32.83	0.6717	Zika	Dengue	NaN	NaN	NaN
Zika / Dengue	P05109	P05109	-0.271617	0.271617	0.107697	0.0506519	214	P05109	S100A8	Protein S100-A8	S10A8_HUMAN	4	-17.1609	0.828391	Zika	Dengue	NaN	NaN	NaN
Zika / Dengue	A0A0C4DH36	A0A0C4DH36	0.0430065	0.0430065	0.10812	0.0507929	244	A0A0C4DH36	IGHV3-38	Immunoglobulin heavy variable 3-38 (non-functional) (Fragment)	A0A0C4DH36_HUMAN	4	3.02586	1.03026	Zika	Dengue	NaN	NaN	NaN
Zika / Dengue	Q6UX71	Q6UX71	-0.139012	0.139012	0.109978	0.0512569	114	Q6UX71	PLXDC2	Plexin domain-containing protein 2	PXDC2_HUMAN	7	-9.18589	0.908141	Zika	Dengue	NaN	NaN	NaN
Zika / Dengue	F8VYK9;P24592	F8VYK9;P24592	-0.346201	0.346201	0.111677	0.0519897	54	F8VYK9;P24592	IGFBP6	Insulin-like growth factor-binding protein 6	F8VYK9_HUMAN;IBP6_HUMAN	4	-21.3347	0.786653	Zika	Dengue	NaN	NaN	NaN
Zika / Dengue	A0A0C4DGB6	A0A0C4DGB6	-0.279587	0.279587	0.112883	0.0524328	114	A0A0C4DGB6	ALB	Serum albumin	A0A0C4DGB6_HUMAN	1	-17.6173	0.823827	Zika	Dengue	NaN	NaN	NaN
Zika / Dengue	P08567	P08567	0.409889	0.409889	0.113212	0.0525261	32	P08567	PLEK	Pleckstrin	PLEK_HUMAN	8	32.8584	1.32858	Zika	Dengue	NaN	NaN	NaN
Zika / Dengue	P27918	P27918	-0.1493	0.1493	0.11406	0.0528007	244	P27918	CFP	Properdin	PROP_HUMAN	16	-9.83123	0.901688	Zika	Dengue	NaN	NaN	NaN
Zika / Dengue	P08514;P08514-2;P08514-3	P08514;P08514-2;P08514-3	-1.27193	1.27193	0.1162	0.0533749	20	P08514;P08514-2;P08514-3	ITGA2B	Integrin alpha-IIb;Isoform 2 of Integrin alpha-IIb;Isoform 3 of Integrin alpha-IIb	ITA2B_HUMAN	6	-58.5893	0.414107	Zika	Dengue	NaN	NaN	NaN
Zika / Dengue	Q9BXR6	Q9BXR6	-0.149727	0.149727	0.116947	0.0534973	220	Q9BXR6	CFHR5	Complement factor H-related protein 5	FHR5_HUMAN	21	-9.85787	0.901421	Zika	Dengue	NaN	NaN	NaN
Zika / Dengue	E9PK25;G3V1A4;P23528	E9PK25;G3V1A4;P23528	-0.0338221	0.0338221	0.116993	0.0534973	94	E9PK25;G3V1A4;P23528	CFL1	Cofilin-1;Cofilin 1 (Non-muscle), isoform CRA_a;Cofilin-1	E9PK25_HUMAN;G3V1A4_HUMAN;COF1_HUMAN	9	-2.3171	0.976829	Zika	Dengue	NaN	NaN	NaN
Zika / Dengue	P36955	P36955	0.0875882	0.0875882	0.12262	0.0558226	244	P36955	SERPINF1	Pigment epithelium-derived factor	PEDF_HUMAN	34	6.25923	1.06259	Zika	Dengue	NaN	NaN	NaN
Zika / Dengue	P55774	P55774	-0.0287418	0.0287418	0.123514	0.0561055	10	P55774	CCL18	C-C motif chemokine 18	CCL18_HUMAN	2	-1.97251	0.980275	Zika	Dengue	NaN	NaN	NaN
Zika / Dengue	P10721;P10721-2;P10721-3	P10721;P10721-2;P10721-3	0.111224	0.111224	0.123975	0.0562532	32	P10721;P10721-2;P10721-3	KIT	Mast/stem cell growth factor receptor Kit;Isoform 2 of Mast/stem cell growth factor receptor Kit;Isoform 3 of Mast/stem cell growth factor receptor Kit	KIT_HUMAN	4	8.01442	1.08014	Zika	Dengue	NaN	NaN	NaN
Zika / Dengue	P05155;P05155-3	P05155;P05155-3	0.113681	0.113681	0.125376	0.0566263	244	P05155;P05155-3	SERPING1	Plasma protease C1 inhibitor;Isoform 3 of Plasma protease C1 inhibitor	IC1_HUMAN	37	8.19857	1.08199	Zika	Dengue	NaN	NaN	NaN
Zika / Dengue	A0A0U1RQQ4;Q9UNN8	A0A0U1RQQ4;Q9UNN8	0.220445	0.220445	0.126495	0.0568951	120	A0A0U1RQQ4;Q9UNN8	PROCR	Endothelial protein C receptor (Fragment);Endothelial protein C receptor	A0A0U1RQQ4_HUMAN;EPCR_HUMAN	3	16.5093	1.16509	Zika	Dengue	NaN	NaN	NaN
Zika / Dengue	P33151	P33151	-0.0936504	0.0936504	0.133187	0.0594508	240	P33151	CDH5	Cadherin-5	CADH5_HUMAN	16	-6.28515	0.937149	Zika	Dengue	NaN	NaN	NaN
Zika / Dengue	P25311	P25311	0.132175	0.132175	0.135692	0.0602424	244	P25311	AZGP1	Zinc-alpha-2-glycoprotein	ZA2G_HUMAN	30	9.5945	1.09595	Zika	Dengue	NaN	NaN	NaN
Zika / Dengue	E9PHK0;P05452	E9PHK0;P05452	0.0478192	0.0478192	0.135538	0.0602424	244	E9PHK0;P05452	CLEC3B	Tetranectin	E9PHK0_HUMAN;TETN_HUMAN	11	3.37012	1.0337	Zika	Dengue	NaN	NaN	NaN
Zika / Dengue	P02749	P02749	0.112492	0.112492	0.136066	0.0603434	244	P02749	APOH	Beta-2-glycoprotein 1	APOH_HUMAN	30	8.10938	1.08109	Zika	Dengue	NaN	NaN	NaN
Zika / Dengue	A0A0B4J1X8	A0A0B4J1X8	-0.023575	0.023575	0.138386	0.0613064	244	A0A0B4J1X8	IGHV3-43	Immunoglobulin heavy variable 3-43	HV343_HUMAN	3	-1.62082	0.983792	Zika	Dengue	NaN	NaN	NaN
Zika / Dengue	A0A0B4J1V0	A0A0B4J1V0	-0.0626048	0.0626048	0.139796	0.061732	240	A0A0B4J1V0	IGHV3-15	Immunoglobulin heavy variable 3-15	HV315_HUMAN	10	-4.24663	0.957534	Zika	Dengue	NaN	NaN	NaN
Zika / Dengue	A0A075B6J1	A0A075B6J1	0.24129	0.24129	0.144639	0.063666	98	A0A075B6J1	IGLV5-37	Immunoglobulin lambda variable 5-37	LV537_HUMAN	2	18.2049	1.18205	Zika	Dengue	NaN	NaN	NaN
Zika / Dengue	P60709;P63261	P60709;P63261	-0.244855	0.244855	0.145223	0.0638548	244	P60709;P63261	ACTB;ACTG1	Actin, cytoplasmic 1;Actin, cytoplasmic 2	ACTB_HUMAN;ACTG_HUMAN	26	-15.6099	0.843901	Zika	Dengue	NaN	NaN	NaN
Zika / Dengue	Q92905	Q92905	-0.127378	0.127378	0.146139	0.0641575	162	Q92905	COPS5	COP9 signalosome complex subunit 5	CSN5_HUMAN	1	-8.45065	0.915494	Zika	Dengue	NaN	NaN	NaN
Zika / Dengue	P02750	P02750	-0.107007	0.107007	0.147121	0.0644829	244	P02750	LRG1	Leucine-rich alpha-2-glycoprotein	A2GL_HUMAN	20	-7.14876	0.928512	Zika	Dengue	NaN	NaN	NaN
Zika / Dengue	A0A0C4DH24	A0A0C4DH24	-0.12576	0.12576	0.147397	0.064535	180	A0A0C4DH24	IGKV6-21	Immunoglobulin kappa variable 6-21	KV621_HUMAN	1	-8.34792	0.916521	Zika	Dengue	NaN	NaN	NaN
Zika / Dengue	A0A075B6K4	A0A075B6K4	-0.0848924	0.0848924	0.147703	0.0646003	244	A0A075B6K4	IGLV3-10	Immunoglobulin lambda variable 3-10	LV310_HUMAN	7	-5.71452	0.942855	Zika	Dengue	NaN	NaN	NaN
Zika / Dengue	Q6UXB8;Q6UXB8-2	Q6UXB8;Q6UXB8-2	-0.144748	0.144748	0.148044	0.0646808	196	Q6UXB8;Q6UXB8-2	PI16	Peptidase inhibitor 16;Isoform 2 of Peptidase inhibitor 16	PI16_HUMAN	9	-9.54629	0.904537	Zika	Dengue	NaN	NaN	NaN
Zika / Dengue	A0A075B6I1	A0A075B6I1	-0.0349067	0.0349067	0.150763	0.0656598	212	A0A075B6I1	IGLV4-60	Immunoglobulin lambda variable 4-60	LV460_HUMAN	4	-2.39051	0.976095	Zika	Dengue	NaN	NaN	NaN
Zika / Dengue	P00738	P00738	-0.140561	0.140561	0.152599	0.0663193	244	P00738	HP	Haptoglobin	HPT_HUMAN	56	-9.28337	0.907166	Zika	Dengue	NaN	NaN	NaN
Zika / Dengue	Q06033;Q06033-2	Q06033;Q06033-2	-0.0203651	0.0203651	0.153019	0.0664319	244	Q06033;Q06033-2	ITIH3	Inter-alpha-trypsin inhibitor heavy chain H3;Isoform 2 of Inter-alpha-trypsin inhibitor heavy chain H3	ITIH3_HUMAN	44	-1.40168	0.985983	Zika	Dengue	NaN	NaN	NaN
Zika / Dengue	O95497	O95497	-0.335787	0.335787	0.155136	0.0671386	86	O95497	VNN1	Pantetheinase	VNN1_HUMAN	5	-20.7648	0.792352	Zika	Dengue	NaN	NaN	NaN
Zika / Dengue	A0A0G2JRQ6	A0A0G2JRQ6	-0.137545	0.137545	0.157771	0.0680513	244	A0A0G2JRQ6	NaN	Uncharacterized protein (Fragment)	A0A0G2JRQ6_HUMAN	5	-9.0935	0.909065	Zika	Dengue	NaN	NaN	NaN
Zika / Dengue	Q6ZRK6	Q6ZRK6	-0.143797	0.143797	0.168045	0.0718945	76	Q6ZRK6	CCDC73	Coiled-coil domain-containing protein 73	CCD73_HUMAN	1	-9.48664	0.905134	Zika	Dengue	NaN	NaN	NaN
Zika / Dengue	A0A1W2PP64	A0A1W2PP64	0.00471375	0.00471375	0.173259	0.0737424	242	A0A1W2PP64	NaN	Uncharacterized protein	A0A1W2PP64_HUMAN	1	0.327267	1.00327	Zika	Dengue	NaN	NaN	NaN
Zika / Dengue	P68363	P68363	-0.021844	0.021844	0.179315	0.0757722	14	P68363	TUBA1B	Tubulin alpha-1B chain	TBA1B_HUMAN	8	-1.50271	0.984973	Zika	Dengue	NaN	NaN	NaN
Zika / Dengue	P01817	P01817	0.152469	0.152469	0.180047	0.0759255	208	P01817	IGHV2-5	Immunoglobulin heavy variable 2-5	HV205_HUMAN	7	11.147	1.11147	Zika	Dengue	NaN	NaN	NaN
Zika / Dengue	C9JHR8;F5GZZ9;Q86VB7;Q86VB7-2;Q86VB7-3;Q86VB7-4	C9JHR8;F5GZZ9;Q86VB7;Q86VB7-2;Q86VB7-3;Q86VB7-4	0.287288	0.287288	0.181854	0.0763749	110	C9JHR8;F5GZZ9;Q86VB7;Q86VB7-2;Q86VB7-3;Q86VB7-4	CD163	Scavenger receptor cysteine-rich type 1 protein M130;Scavenger receptor cysteine-rich type 1 protein M130;Scavenger receptor cysteine-rich type 1 protein M130;Isoform 2 of Scavenger receptor cysteine-rich type 1 protein M130;Isoform 3 of Scavenger receptor cysteine-rich type 1 protein M130;Isoform 4 of Scavenger receptor cysteine-rich type 1 protein M130	C9JHR8_HUMAN;F5GZZ9_HUMAN;C163A_HUMAN;C163A_HUMAN;C163A_HUMAN;C163A_HUMAN	15	22.0344	1.22034	Zika	Dengue	NaN	NaN	NaN
Zika / Dengue	P04180	P04180	0.0406614	0.0406614	0.182467	0.0765545	242	P04180	LCAT	Phosphatidylcholine-sterol acyltransferase	LCAT_HUMAN	9	2.85853	1.02859	Zika	Dengue	NaN	NaN	NaN
Zika / Dengue	P07195	P07195	0.933662	0.933662	0.184967	0.0773671	186	P07195	LDHB	L-lactate dehydrogenase B chain	LDHB_HUMAN	12	91.0118	1.91012	Zika	Dengue	NaN	NaN	NaN
Zika / Dengue	P43251;P43251-2;P43251-3;P43251-4	P43251;P43251-2;P43251-3;P43251-4	-0.0693373	0.0693373	0.185372	0.0774577	244	P43251;P43251-2;P43251-3;P43251-4	BTD	Biotinidase;Isoform 2 of Biotinidase;Isoform 3 of Biotinidase;Isoform 4 of Biotinidase	BTD_HUMAN	9	-4.69243	0.953076	Zika	Dengue	NaN	NaN	NaN
Zika / Dengue	A0A0C4DH30	A0A0C4DH30	-0.192957	0.192957	0.187081	0.0780137	114	A0A0C4DH30	IGHV3-16	Immunoglobulin heavy variable 3-16 (non-functional) (Fragment)	A0A0C4DH30_HUMAN	1	-12.5189	0.874811	Zika	Dengue	NaN	NaN	NaN
Zika / Dengue	A0M8Q6	A0M8Q6	-0.588994	0.588994	0.190086	0.078947	218	A0M8Q6	IGLC7	Immunoglobulin lambda constant 7	IGLC7_HUMAN	4	-33.5194	0.664806	Zika	Dengue	NaN	NaN	NaN
Zika / Dengue	H0Y300	H0Y300	0.185862	0.185862	0.190758	0.0791463	56	H0Y300	HP	Haptoglobin	H0Y300_HUMAN	2	13.7497	1.1375	Zika	Dengue	NaN	NaN	NaN
Zika / Dengue	B4DPQ0	B4DPQ0	-0.106898	0.106898	0.195209	0.0807489	244	B4DPQ0	C1R	Complement C1r subcomponent	B4DPQ0_HUMAN	54	-7.14174	0.928583	Zika	Dengue	NaN	NaN	NaN
Zika / Dengue	P19652	P19652	0.125434	0.125434	0.198788	0.0819005	244	P19652	ORM2	Alpha-1-acid glycoprotein 2	A1AG2_HUMAN	21	9.08359	1.09084	Zika	Dengue	NaN	NaN	NaN
Zika / Dengue	Q15166	Q15166	-0.0996289	0.0996289	0.205297	0.0844134	100	Q15166	PON3	Serum paraoxonase/lactonase 3	PON3_HUMAN	8	-6.6727	0.933273	Zika	Dengue	NaN	NaN	NaN
Zika / Dengue	A0A0A0MSA9;A0A0C4DG49;P15151;P15151-2;P15151-3;P15151-4	A0A0A0MSA9;A0A0C4DG49;P15151;P15151-2;P15151-3;P15151-4	-0.194366	0.194366	0.207234	0.085125	112	A0A0A0MSA9;A0A0C4DG49;P15151;P15151-2;P15151-3;P15151-4	PVR	Poliovirus receptor;Poliovirus receptor;Poliovirus receptor;Isoform Beta of Poliovirus receptor;Isoform Gamma of Poliovirus receptor;Isoform Delta of Poliovirus receptor	A0A0A0MSA9_HUMAN;A0A0C4DG49_HUMAN;PVR_HUMAN;PVR_HUMAN;PVR_HUMAN;PVR_HUMAN	3	-12.6043	0.873957	Zika	Dengue	NaN	NaN	NaN
Zika / Dengue	A0A0C4DH38	A0A0C4DH38	0.117307	0.117307	0.210716	0.0859554	244	A0A0C4DH38	IGHV5-51	Immunoglobulin heavy variable 5-51	HV551_HUMAN	8	8.47079	1.08471	Zika	Dengue	NaN	NaN	NaN
Zika / Dengue	P01718	P01718	0.239112	0.239112	0.215259	0.0874623	238	P01718	IGLV3-27	Immunoglobulin lambda variable 3-27	LV327_HUMAN	4	18.0266	1.18027	Zika	Dengue	NaN	NaN	NaN
Zika / Dengue	P08311	P08311	-0.227244	0.227244	0.216456	0.0878618	116	P08311	CTSG	Cathepsin G	CATG_HUMAN	7	-14.5735	0.854265	Zika	Dengue	NaN	NaN	NaN
Zika / Dengue	Q5VVK9;Q5VVL2;Q9NUP7;Q9NUP7-2	Q5VVK9;Q5VVL2;Q9NUP7;Q9NUP7-2	-0.155929	0.155929	0.21948	0.0890019	54	Q5VVK9;Q5VVL2;Q9NUP7;Q9NUP7-2	TRMT13	tRNA:m(4)X modification enzyme TRM13 homolog;tRNA:m(4)X modification enzyme TRM13 homolog;tRNA:m(4)X modification enzyme TRM13 homolog;Isoform 2 of tRNA:m(4)X modification enzyme TRM13 homolog	Q5VVK9_HUMAN;Q5VVL2_HUMAN;TRM13_HUMAN;TRM13_HUMAN	1	-10.2445	0.897555	Zika	Dengue	NaN	NaN	NaN
Zika / Dengue	Q5T123;Q9H299	Q5T123;Q9H299	-0.299414	0.299414	0.222151	0.0898427	124	Q5T123;Q9H299	SH3BGRL3	SH3 domain-binding glutamic acid-rich-like protein 3	Q5T123_HUMAN;SH3L3_HUMAN	2	-18.7417	0.812583	Zika	Dengue	NaN	NaN	NaN
Zika / Dengue	F5GYZ5;F5H3C5;F5H4R2;P04179;P04179-3;P04179-4	F5GYZ5;F5H3C5;F5H4R2;P04179;P04179-3;P04179-4	-2.85472	2.85472	0.2345	0.0938206	8	F5GYZ5;F5H3C5;F5H4R2;P04179;P04179-3;P04179-4	SOD2	Superoxide dismutase (Fragment);Superoxide dismutase (Fragment);Superoxide dismutase (Fragment);Superoxide dismutase [Mn], mitochondrial;Isoform 3 of Superoxide dismutase [Mn], mitochondrial;Isoform 4 of Superoxide dismutase [Mn], mitochondrial	F5GYZ5_HUMAN;F5H3C5_HUMAN;F5H4R2_HUMAN;SODM_HUMAN;SODM_HUMAN;SODM_HUMAN	1	-86.1757	0.138243	Zika	Dengue	NaN	NaN	NaN
Zika / Dengue	P00748	P00748	-0.013812	0.013812	0.235613	0.0941539	244	P00748	F12	Coagulation factor XII	FA12_HUMAN	32	-0.952804	0.990472	Zika	Dengue	NaN	NaN	NaN
Zika / Dengue	Q68DL7	Q68DL7	-0.0245325	0.0245325	0.238994	0.0951473	224	Q68DL7	C18orf63	Uncharacterized protein C18orf63	CR063_HUMAN	1	-1.68609	0.983139	Zika	Dengue	NaN	NaN	NaN
Zika / Dengue	A0A0A0MS15	A0A0A0MS15	0.157429	0.157429	0.247981	0.0980502	244	A0A0A0MS15	IGHV3-49	Immunoglobulin heavy variable 3-49	HV349_HUMAN	9	11.5298	1.1153	Zika	Dengue	NaN	NaN	NaN
Zika / Dengue	P01344;P01344-3	P01344;P01344-3	-0.0955584	0.0955584	0.252757	0.0997472	242	P01344;P01344-3	IGF2	Insulin-like growth factor II;Isoform 3 of Insulin-like growth factor II	IGF2_HUMAN	5	-6.40901	0.93591	Zika	Dengue	NaN	NaN	NaN
Zika / Dengue	A0A0C4DH39	A0A0C4DH39	-0.151432	0.151432	0.253451	0.0998298	192	A0A0C4DH39	IGHV1-58	Immunoglobulin heavy variable 1-58	HV158_HUMAN	1	-9.96437	0.900356	Zika	Dengue	NaN	NaN	NaN
Zika / Dengue	P62258	P62258	-0.388184	0.388184	0.256294	0.100565	84	P62258	YWHAE	14-3-3 protein epsilon	1433E_HUMAN	6	-23.5909	0.764091	Zika	Dengue	NaN	NaN	NaN
Zika / Dengue	P13796	P13796	-0.0201172	0.0201172	0.258942	0.101411	228	P13796	LCP1	Plastin-2	PLSL_HUMAN	19	-1.38474	0.986153	Zika	Dengue	NaN	NaN	NaN
Zika / Dengue	A0A075B6S9	A0A075B6S9	0.0124569	0.0124569	0.260405	0.101854	230	A0A075B6S9	IGKV1D-37	Immunoglobulin kappa variable 1-37 (non-functional) (Fragment)	A0A075B6S9_HUMAN	1	0.867184	1.00867	Zika	Dengue	NaN	NaN	NaN
Zika / Dengue	A0A075B6S6	A0A075B6S6	0.322317	0.322317	0.266007	0.103197	70	A0A075B6S6	IGKV2D-30	Immunoglobulin kappa variable 2D-30	KVD30_HUMAN	2	25.0337	1.25034	Zika	Dengue	NaN	NaN	NaN
Zika / Dengue	A0A0U1RR20;Q92954;Q92954-3;Q92954-6	A0A0U1RR20;Q92954;Q92954-3;Q92954-6	-0.0728862	0.0728862	0.267129	0.103405	238	A0A0U1RR20;Q92954;Q92954-3;Q92954-6	PRG4	Proteoglycan 4;Proteoglycan 4;Isoform C of Proteoglycan 4;Isoform F of Proteoglycan 4	A0A0U1RR20_HUMAN;PRG4_HUMAN;PRG4_HUMAN;PRG4_HUMAN	18	-4.92659	0.950734	Zika	Dengue	NaN	NaN	NaN
Zika / Dengue	P09960;P09960-2	P09960;P09960-2	-0.812225	0.812225	0.267296	0.103405	12	P09960;P09960-2	LTA4H	Leukotriene A-4 hydrolase;Isoform 2 of Leukotriene A-4 hydrolase	LKHA4_HUMAN	4	-43.0497	0.569503	Zika	Dengue	NaN	NaN	NaN
Zika / Dengue	A0A075B6I7	A0A075B6I7	0.462236	0.462236	0.286209	0.110204	34	A0A075B6I7	IGLV5-48	Immunoglobulin lambda variable 5-48 (non-functional)	A0A075B6I7_HUMAN	1	37.7675	1.37767	Zika	Dengue	NaN	NaN	NaN
Zika / Dengue	P15169	P15169	-0.000848772	0.000848772	0.288635	0.11093	244	P15169	CPN1	Carboxypeptidase N catalytic chain	CBPN_HUMAN	17	-0.0588151	0.999412	Zika	Dengue	NaN	NaN	NaN
Zika / Dengue	G3V2W1;Q9UK55	G3V2W1;Q9UK55	-0.124174	0.124174	0.295151	0.113118	240	G3V2W1;Q9UK55	SERPINA10	Protein Z-dependent protease inhibitor	G3V2W1_HUMAN;ZPI_HUMAN	26	-8.24705	0.91753	Zika	Dengue	NaN	NaN	NaN
Zika / Dengue	A0A286YEY5;P01877	A0A286YEY5;P01877	-0.0903127	0.0903127	0.295519	0.113154	238	A0A286YEY5;P01877	IGHA2	Immunoglobulin heavy constant alpha 2 (Fragment);Immunoglobulin heavy constant alpha 2	A0A286YEY5_HUMAN;IGHA2_HUMAN	5	-6.06809	0.939319	Zika	Dengue	NaN	NaN	NaN
Zika / Dengue	Q15485	Q15485	-0.0791892	0.0791892	0.298836	0.113895	202	Q15485	FCN2	Ficolin-2	FCN2_HUMAN	10	-5.34105	0.946589	Zika	Dengue	NaN	NaN	NaN
Zika / Dengue	A0A075B6J9	A0A075B6J9	-0.0401214	0.0401214	0.302109	0.114824	244	A0A075B6J9	IGLV2-18	Immunoglobulin lambda variable 2-18	LV218_HUMAN	3	-2.74269	0.972573	Zika	Dengue	NaN	NaN	NaN
Zika / Dengue	A0A0J9YXX1	A0A0J9YXX1	0.677176	0.677176	0.305657	0.115878	186	A0A0J9YXX1	IGHV5-10-1	Immunoglobulin heavy variable 5-10-1	HV5X1_HUMAN	3	59.9007	1.59901	Zika	Dengue	NaN	NaN	NaN
Zika / Dengue	Q15113	Q15113	-0.122215	0.122215	0.305726	0.115878	96	Q15113	PCOLCE	Procollagen C-endopeptidase enhancer 1	PCOC1_HUMAN	9	-8.12239	0.918776	Zika	Dengue	NaN	NaN	NaN
Zika / Dengue	P69891;P69892	P69891;P69892	-0.335461	0.335461	0.311607	0.117782	134	P69891;P69892	HBG1;HBG2	Hemoglobin subunit gamma-1;Hemoglobin subunit gamma-2	HBG1_HUMAN;HBG2_HUMAN	3	-20.7469	0.792531	Zika	Dengue	NaN	NaN	NaN
Zika / Dengue	P02790	P02790	0.0458263	0.0458263	0.315013	0.118517	244	P02790	HPX	Hemopexin	HEMO_HUMAN	50	3.22742	1.03227	Zika	Dengue	NaN	NaN	NaN
Zika / Dengue	P06702	P06702	-0.575848	0.575848	0.314764	0.118517	162	P06702	S100A9	Protein S100-A9	S10A9_HUMAN	9	-32.9108	0.670892	Zika	Dengue	NaN	NaN	NaN
Zika / Dengue	P15144	P15144	0.365272	0.365272	0.314349	0.118517	70	P15144	ANPEP	Aminopeptidase N	AMPN_HUMAN	10	28.8125	1.28812	Zika	Dengue	NaN	NaN	NaN
Zika / Dengue	P02730	P02730	0.307218	0.307218	0.315419	0.118517	50	P02730	SLC4A1	Band 3 anion transport protein	B3AT_HUMAN	7	23.732	1.23732	Zika	Dengue	NaN	NaN	NaN
Zika / Dengue	A0A075B6S5	A0A075B6S5	-0.403096	0.403096	0.323406	0.120726	178	A0A075B6S5	IGKV1-27	Immunoglobulin kappa variable 1-27	KV127_HUMAN	4	-24.3767	0.756233	Zika	Dengue	NaN	NaN	NaN
Zika / Dengue	Q9NZP8	Q9NZP8	0.0781525	0.0781525	0.329262	0.122213	244	Q9NZP8	C1RL	Complement C1r subcomponent-like protein	C1RL_HUMAN	13	5.56653	1.05567	Zika	Dengue	NaN	NaN	NaN
Zika / Dengue	A0A0C4DH25	A0A0C4DH25	0.139457	0.139457	0.347168	0.127708	244	A0A0C4DH25	IGKV3D-20	Immunoglobulin kappa variable 3D-20	KVD20_HUMAN	2	10.1491	1.10149	Zika	Dengue	NaN	NaN	NaN
Zika / Dengue	A0A0A0MRZ9	A0A0A0MRZ9	-1.05561	1.05561	0.352033	0.129265	28	A0A0A0MRZ9	IGLV5-52	Immunoglobulin lambda variable 5-52	LV552_HUMAN	2	-51.8908	0.481092	Zika	Dengue	NaN	NaN	NaN
Zika / Dengue	K7EL47;K7EQZ5;Q16853;Q16853-3	K7EL47;K7EQZ5;Q16853;Q16853-3	0.115492	0.115492	0.353445	0.129537	80	K7EL47;K7EQZ5;Q16853;Q16853-3	AOC3	Amine oxidase (Fragment);Amine oxidase (Fragment);Membrane primary amine oxidase;Isoform 3 of Membrane primary amine oxidase	K7EL47_HUMAN;K7EQZ5_HUMAN;AOC3_HUMAN;AOC3_HUMAN	1	8.33442	1.08334	Zika	Dengue	NaN	NaN	NaN
Zika / Dengue	P11597;P11597-2	P11597;P11597-2	0.436778	0.436778	0.358095	0.13091	134	P11597;P11597-2	CETP	Cholesteryl ester transfer protein;Isoform 2 of Cholesteryl ester transfer protein	CETP_HUMAN	4	35.3578	1.35358	Zika	Dengue	NaN	NaN	NaN
Zika / Dengue	P08519	P08519	-0.0942924	0.0942924	0.364255	0.132808	244	P08519	LPA	Apolipoprotein(a)	APOA_HUMAN	47	-6.32684	0.936732	Zika	Dengue	NaN	NaN	NaN
Zika / Dengue	P00739	P00739	0.169634	0.169634	0.366487	0.133504	244	P00739	HPR	Haptoglobin-related protein	HPTR_HUMAN	18	12.4773	1.12477	Zika	Dengue	NaN	NaN	NaN
Zika / Dengue	P55058	P55058	0.0391441	0.0391441	0.385783	0.139791	230	P55058	PLTP	Phospholipid transfer protein	PLTP_HUMAN	13	2.75041	1.0275	Zika	Dengue	NaN	NaN	NaN
Zika / Dengue	A0A075B6K5	A0A075B6K5	0.0876079	0.0876079	0.386342	0.139871	244	A0A075B6K5	IGLV3-9	Immunoglobulin lambda variable 3-9	LV39_HUMAN	5	6.26069	1.06261	Zika	Dengue	NaN	NaN	NaN
Zika / Dengue	P02760	P02760	-0.0706624	0.0706624	0.389448	0.140792	244	P02760	AMBP	Protein AMBP	AMBP_HUMAN	31	-4.77993	0.952201	Zika	Dengue	NaN	NaN	NaN
Zika / Dengue	A0A087WTE4;A0A087WTF6;A0A087WV75;A0A087WWD4;A0A087WX77;H7BYX6;P13591;P13591-1;P13591-3;P13591-4	A0A087WTE4;A0A087WTF6;A0A087WV75;A0A087WWD4;A0A087WX77;H7BYX6;P13591;P13591-1;P13591-3;P13591-4	0.129451	0.129451	0.390173	0.140886	64	A0A087WTE4;A0A087WTF6;A0A087WV75;A0A087WWD4;A0A087WX77;H7BYX6;P13591;P13591-1;P13591-3;P13591-4	NCAM1	Neural cell adhesion molecule 1;Neural cell adhesion molecule 1;Neural cell adhesion molecule 1;Neural cell adhesion molecule 1;Neural cell adhesion molecule 1;Neural cell adhesion molecule 1;Neural cell adhesion molecule 1;Isoform 2 of Neural cell adhesion molecule 1;Isoform 3 of Neural cell adhesion molecule 1;Isoform 4 of Neural cell adhesion molecule 1	A0A087WTE4_HUMAN;A0A087WTF6_HUMAN;A0A087WV75_HUMAN;A0A087WWD4_HUMAN;A0A087WX77_HUMAN;H7BYX6_HUMAN;NCAM1_HUMAN;NCAM1_HUMAN;NCAM1_HUMAN;NCAM1_HUMAN	13	9.38771	1.09388	Zika	Dengue	NaN	NaN	NaN
Zika / Dengue	P01717	P01717	-0.180494	0.180494	0.390827	0.140999	226	P01717	IGLV3-25	Immunoglobulin lambda variable 3-25	LV325_HUMAN	2	-11.7599	0.882401	Zika	Dengue	NaN	NaN	NaN
Zika / Dengue	Q5T7N2	Q5T7N2	-0.00997788	0.00997788	0.395935	0.142343	244	Q5T7N2	L1TD1	LINE-1 type transposase domain-containing protein 1	LITD1_HUMAN	1	-0.689228	0.993108	Zika	Dengue	NaN	NaN	NaN
Zika / Dengue	P01861	P01861	0.0463377	0.0463377	0.40142	0.143813	244	P01861	IGHG4	Immunoglobulin heavy constant gamma 4	IGHG4_HUMAN	24	3.26402	1.03264	Zika	Dengue	NaN	NaN	NaN
Zika / Dengue	P62328	P62328	0.289595	0.289595	0.402077	0.143923	94	P62328	TMSB4X	Thymosin beta-4	TYB4_HUMAN	3	22.2297	1.2223	Zika	Dengue	NaN	NaN	NaN
Zika / Dengue	P01709	P01709	0.125952	0.125952	0.41356	0.147521	242	P01709	IGLV2-8	Immunoglobulin lambda variable 2-8	LV208_HUMAN	2	9.12273	1.09123	Zika	Dengue	NaN	NaN	NaN
Zika / Dengue	P14151;P14151-2	P14151;P14151-2	0.00914917	0.00914917	0.41593	0.14811	230	P14151;P14151-2	SELL	L-selectin;Isoform 2 of L-selectin	LYAM1_HUMAN	10	0.636187	1.00636	Zika	Dengue	NaN	NaN	NaN
Zika / Dengue	P01031	P01031	0.0635023	0.0635023	0.420123	0.149474	244	P01031	C5	Complement C5	CO5_HUMAN	116	4.49995	1.045	Zika	Dengue	NaN	NaN	NaN
Zika / Dengue	P01591	P01591	-0.105599	0.105599	0.422388	0.15015	244	P01591	JCHAIN	Immunoglobulin J chain	IGJ_HUMAN	16	-7.05808	0.929419	Zika	Dengue	NaN	NaN	NaN
Zika / Dengue	P01019	P01019	-0.0386868	0.0386868	0.429223	0.152317	244	P01019	AGT	Angiotensinogen	ANGT_HUMAN	22	-2.64593	0.973541	Zika	Dengue	NaN	NaN	NaN
Zika / Dengue	D6RF35	D6RF35	0.123441	0.123441	0.433566	0.153408	222	D6RF35	GC	Vitamin D-binding protein	D6RF35_HUMAN	3	8.93302	1.08933	Zika	Dengue	NaN	NaN	NaN
Zika / Dengue	Q01518;Q5T0R1;Q5T0R2;Q5T0R3;Q5T0R4;Q5T0R5;Q5T0R6;Q5T0R7	Q01518;Q5T0R1;Q5T0R2;Q5T0R3;Q5T0R4;Q5T0R5;Q5T0R6;Q5T0R7	0.269241	0.269241	0.433145	0.153408	70	Q01518;Q5T0R1;Q5T0R2;Q5T0R3;Q5T0R4;Q5T0R5;Q5T0R6;Q5T0R7	CAP1	Adenylyl cyclase-associated protein 1;Adenylyl cyclase-associated protein 1 (Fragment);Adenylyl cyclase-associated protein 1 (Fragment);Adenylyl cyclase-associated protein 1 (Fragment);Adenylyl cyclase-associated protein 1 (Fragment);Adenylyl cyclase-associated protein 1 (Fragment);Adenylyl cyclase-associated protein 1 (Fragment);Adenylyl cyclase-associated protein 1 (Fragment)	CAP1_HUMAN;Q5T0R1_HUMAN;Q5T0R2_HUMAN;Q5T0R3_HUMAN;Q5T0R4_HUMAN;Q5T0R5_HUMAN;Q5T0R6_HUMAN;Q5T0R7_HUMAN	2	20.5174	1.20517	Zika	Dengue	NaN	NaN	NaN
Zika / Dengue	A0A0B4J1Y8	A0A0B4J1Y8	0.185781	0.185781	0.44194	0.155623	194	A0A0B4J1Y8	IGLV9-49	Immunoglobulin lambda variable 9-49	LV949_HUMAN	7	13.7433	1.13743	Zika	Dengue	NaN	NaN	NaN
Zika / Dengue	P22891;P22891-2	P22891;P22891-2	0.0747745	0.0747745	0.447304	0.157243	222	P22891;P22891-2	PROZ	Vitamin K-dependent protein Z;Isoform 2 of Vitamin K-dependent protein Z	PROZ_HUMAN	10	5.31964	1.0532	Zika	Dengue	NaN	NaN	NaN
Zika / Dengue	A0A087WSX0	A0A087WSX0	-0.0794093	0.0794093	0.451446	0.158294	170	A0A087WSX0	IGLV5-45	Immunoglobulin lambda variable 5-45	LV545_HUMAN	1	-5.35549	0.946445	Zika	Dengue	NaN	NaN	NaN
Zika / Dengue	P00734	P00734	-0.0196258	0.0196258	0.456157	0.159674	244	P00734	F2	Prothrombin	THRB_HUMAN	39	-1.35115	0.986489	Zika	Dengue	NaN	NaN	NaN
Zika / Dengue	P14625	P14625	-0.296804	0.296804	0.467526	0.1631	78	P14625	HSP90B1	Endoplasmin	ENPL_HUMAN	9	-18.5946	0.814054	Zika	Dengue	NaN	NaN	NaN
Zika / Dengue	C9JF17;P05090	C9JF17;P05090	0.0485691	0.0485691	0.469303	0.163581	244	C9JF17;P05090	APOD	Apolipoprotein D (Fragment);Apolipoprotein D	C9JF17_HUMAN;APOD_HUMAN	14	3.42387	1.03424	Zika	Dengue	NaN	NaN	NaN
Zika / Dengue	P07900;P07900-2	P07900;P07900-2	2.62387	2.62387	0.473665	0.164823	16	P07900;P07900-2	HSP90AA1	Heat shock protein HSP 90-alpha;Isoform 2 of Heat shock protein HSP 90-alpha	HS90A_HUMAN	9	516.402	6.16402	Zika	Dengue	NaN	NaN	NaN
Zika / Dengue	Q03591	Q03591	-0.0594823	0.0594823	0.486041	0.168142	244	Q03591	CFHR1	Complement factor H-related protein 1	FHR1_HUMAN	9	-4.03916	0.959608	Zika	Dengue	NaN	NaN	NaN
Zika / Dengue	P08294	P08294	0.154693	0.154693	0.486062	0.168142	138	P08294	SOD3	Extracellular superoxide dismutase [Cu-Zn]	SODE_HUMAN	5	11.3185	1.11318	Zika	Dengue	NaN	NaN	NaN
Zika / Dengue	A0A0A0MT69	A0A0A0MT69	0.146678	0.146678	0.491808	0.169683	240	A0A0A0MT69	IGKJ4	Immunoglobulin kappa joining 4 (Fragment)	A0A0A0MT69_HUMAN	1	10.7017	1.10702	Zika	Dengue	NaN	NaN	NaN
Zika / Dengue	P07357	P07357	-0.0273102	0.0273102	0.491415	0.169683	244	P07357	C8A	Complement component C8 alpha chain	CO8A_HUMAN	39	-1.87519	0.981248	Zika	Dengue	NaN	NaN	NaN
Zika / Dengue	P04040	P04040	-0.198222	0.198222	0.494582	0.170374	122	P04040	CAT	Catalase	CATA_HUMAN	15	-12.8376	0.871624	Zika	Dengue	NaN	NaN	NaN
Zika / Dengue	E7END6;P04070;P04070-2	E7END6;P04070;P04070-2	0.0465083	0.0465083	0.495799	0.170508	234	E7END6;P04070;P04070-2	PROC	Vitamin K-dependent protein C;Vitamin K-dependent protein C;Isoform 2 of Vitamin K-dependent protein C	E7END6_HUMAN;PROC_HUMAN;PROC_HUMAN	11	3.27623	1.03276	Zika	Dengue	NaN	NaN	NaN
Zika / Dengue	P01715	P01715	-0.24991	0.24991	0.496657	0.170519	150	P01715	IGLV3-1	Immunoglobulin lambda variable 3-1	LV301_HUMAN	2	-15.9051	0.840949	Zika	Dengue	NaN	NaN	NaN
Zika / Dengue	P00441	P00441	-0.320015	0.320015	0.496588	0.170519	48	P00441	SOD1	Superoxide dismutase [Cu-Zn]	SODC_HUMAN	5	-19.8938	0.801062	Zika	Dengue	NaN	NaN	NaN
Zika / Dengue	A0A286YES5;P01854	A0A286YES5;P01854	-0.301933	0.301933	0.514183	0.17595	86	A0A286YES5;P01854	IGHE	Immunoglobulin heavy constant epsilon (Fragment);Immunoglobulin heavy constant epsilon	A0A286YES5_HUMAN;IGHE_HUMAN	9	-18.8835	0.811165	Zika	Dengue	NaN	NaN	NaN
Zika / Dengue	P02747	P02747	-0.0052666	0.0052666	0.526672	0.179338	244	P02747	C1QC	Complement C1q subcomponent subunit C	C1QC_HUMAN	10	-0.364387	0.996356	Zika	Dengue	NaN	NaN	NaN
Zika / Dengue	A0A0U1RR32;A0A0U1RRH7;P0C0S8;P20671;Q16777;Q6FI13;Q96KK5;Q99878;Q9BTM1	A0A0U1RR32;A0A0U1RRH7;P0C0S8;P20671;Q16777;Q6FI13;Q96KK5;Q99878;Q9BTM1	-0.104454	0.104454	0.542131	0.18308	142	A0A0U1RR32;A0A0U1RRH7;P0C0S8;P20671;Q16777;Q6FI13;Q96KK5;Q99878;Q9BTM1	HIST1H3D;HIST1H3D;HIST1H2AG;HIST1H2AD;HIST2H2AC;HIST2H2AA3;HIST1H2AH;HIST1H2AJ;H2AFJ	Histone H2A;Histone H2A;Histone H2A type 1;Histone H2A type 1-D;Histone H2A type 2-C;Histone H2A type 2-A;Histone H2A type 1-H;Histone H2A type 1-J;Histone H2A.J	A0A0U1RR32_HUMAN;A0A0U1RRH7_HUMAN;H2A1_HUMAN;H2A1D_HUMAN;H2A2C_HUMAN;H2A2A_HUMAN;H2A1H_HUMAN;H2A1J_HUMAN;H2AJ_HUMAN	3	-6.98428	0.930157	Zika	Dengue	NaN	NaN	NaN
Zika / Dengue	P05543	P05543	0.0193921	0.0193921	0.549188	0.184844	244	P05543	SERPINA7	Thyroxine-binding globulin	THBG_HUMAN	20	1.35324	1.01353	Zika	Dengue	NaN	NaN	NaN
Zika / Dengue	A0A087X0M8;O00533;O00533-2	A0A087X0M8;O00533;O00533-2	0.0528143	0.0528143	0.550046	0.184844	214	A0A087X0M8;O00533;O00533-2	CHL1	Neural cell adhesion molecule L1-like protein;Neural cell adhesion molecule L1-like protein;Isoform 2 of Neural cell adhesion molecule L1-like protein	A0A087X0M8_HUMAN;NCHL1_HUMAN;NCHL1_HUMAN	8	3.72864	1.03729	Zika	Dengue	NaN	NaN	NaN
Zika / Dengue	E7ESV4;F5H7Y6;P61224;P61224-3;P61224-4	E7ESV4;F5H7Y6;P61224;P61224-3;P61224-4	0.0296413	0.0296413	0.555726	0.186601	40	E7ESV4;F5H7Y6;P61224;P61224-3;P61224-4	RAP1B	Ras-related protein Rap-1b (Fragment);Ras-related protein Rap-1b;Ras-related protein Rap-1b;Isoform 3 of Ras-related protein Rap-1b;Isoform 4 of Ras-related protein Rap-1b	E7ESV4_HUMAN;F5H7Y6_HUMAN;RAP1B_HUMAN;RAP1B_HUMAN;RAP1B_HUMAN	3	2.07583	1.02076	Zika	Dengue	NaN	NaN	NaN
Zika / Dengue	A0A0A0MRJ7;P12259	A0A0A0MRJ7;P12259	0.0425493	0.0425493	0.573393	0.191907	244	A0A0A0MRJ7;P12259	F5	Coagulation factor V	A0A0A0MRJ7_HUMAN;FA5_HUMAN	56	2.99321	1.02993	Zika	Dengue	NaN	NaN	NaN
Zika / Dengue	A0A0J9YY99	A0A0J9YY99	0.0157641	0.0157641	0.573887	0.191917	244	A0A0J9YY99	NaN	Uncharacterized protein (Fragment)	A0A0J9YY99_HUMAN	7	1.09868	1.01099	Zika	Dengue	NaN	NaN	NaN
Zika / Dengue	P02763	P02763	-0.0316811	0.0316811	0.580493	0.193968	244	P02763	ORM1	Alpha-1-acid glycoprotein 1	A1AG1_HUMAN	14	-2.17203	0.97828	Zika	Dengue	NaN	NaN	NaN
Zika / Dengue	Q13228;Q13228-4	Q13228;Q13228-4	-0.219515	0.219515	0.583206	0.194288	16	Q13228;Q13228-4	SELENBP1	Selenium-binding protein 1;Isoform 4 of Selenium-binding protein 1	SBP1_HUMAN	5	-14.1146	0.858854	Zika	Dengue	NaN	NaN	NaN
Zika / Dengue	P02765	P02765	0.0222724	0.0222724	0.589034	0.195615	244	P02765	AHSG	Alpha-2-HS-glycoprotein	FETUA_HUMAN	23	1.55579	1.01556	Zika	Dengue	NaN	NaN	NaN
Zika / Dengue	P01024	P01024	0.0304025	0.0304025	0.592702	0.196297	244	P01024	C3	Complement C3	CO3_HUMAN	233	2.1297	1.0213	Zika	Dengue	NaN	NaN	NaN
Zika / Dengue	K7ERG9;P00746	K7ERG9;P00746	-0.0477379	0.0477379	0.592568	0.196297	240	K7ERG9;P00746	CFD	Complement factor D	K7ERG9_HUMAN;CFAD_HUMAN	10	-3.25479	0.967452	Zika	Dengue	NaN	NaN	NaN
Zika / Dengue	P68032;P68133	P68032;P68133	0.0898574	0.0898574	0.599093	0.197646	90	P68032;P68133	ACTC1;ACTA1	Actin, alpha cardiac muscle 1;Actin, alpha skeletal muscle	ACTC_HUMAN;ACTS_HUMAN	3	6.4265	1.06426	Zika	Dengue	NaN	NaN	NaN
Zika / Dengue	E7ERL0;J3KPD9;O60361;P15531;P15531-2;P22392;P22392-2;Q32Q12	E7ERL0;J3KPD9;O60361;P15531;P15531-2;P22392;P22392-2;Q32Q12	0.000400912	0.000400912	0.598543	0.197646	32	E7ERL0;J3KPD9;O60361;P15531;P15531-2;P22392;P22392-2;Q32Q12	NME1;NME1-NME2;NME2P1;NME1;NME1;NME2;NME2;NME1-NME2	Nucleoside diphosphate kinase A;NME1-NME2 readthrough;Putative nucleoside diphosphate kinase;Nucleoside diphosphate kinase A;Isoform 2 of Nucleoside diphosphate kinase A;Nucleoside diphosphate kinase B;Isoform 3 of Nucleoside diphosphate kinase B;Nucleoside diphosphate kinase	E7ERL0_HUMAN;J3KPD9_HUMAN;NDK8_HUMAN;NDKA_HUMAN;NDKA_HUMAN;NDKB_HUMAN;NDKB_HUMAN;Q32Q12_HUMAN	1	0.027793	1.00028	Zika	Dengue	NaN	NaN	NaN
Zika / Dengue	P40197	P40197	-0.0823701	0.0823701	0.601863	0.198216	120	P40197	GP5	Platelet glycoprotein V	GPV_HUMAN	9	-5.54953	0.944505	Zika	Dengue	NaN	NaN	NaN
Zika / Dengue	P60174;P60174-1;P60174-4	P60174;P60174-1;P60174-4	0.045802	0.045802	0.607935	0.200055	58	P60174;P60174-1;P60174-4	TPI1	Triosephosphate isomerase;Isoform 2 of Triosephosphate isomerase;Isoform 4 of Triosephosphate isomerase	TPIS_HUMAN	4	3.22568	1.03226	Zika	Dengue	NaN	NaN	NaN
Zika / Dengue	P31146	P31146	-0.45618	0.45618	0.612575	0.200461	48	P31146	CORO1A	Coronin-1A	COR1A_HUMAN	12	-27.1086	0.728914	Zika	Dengue	NaN	NaN	NaN
Zika / Dengue	Q04756	Q04756	-0.0534082	0.0534082	0.628926	0.205323	244	Q04756	HGFAC	Hepatocyte growth factor activator	HGFA_HUMAN	25	-3.63429	0.963657	Zika	Dengue	NaN	NaN	NaN
Zika / Dengue	P01782	P01782	0.0224419	0.0224419	0.639001	0.208282	244	P01782	IGHV3-9	Immunoglobulin heavy variable 3-9	HV309_HUMAN	9	1.56772	1.01568	Zika	Dengue	NaN	NaN	NaN
Zika / Dengue	F5H8B0;P08709;P08709-2	F5H8B0;P08709;P08709-2	-0.248796	0.248796	0.640409	0.208576	190	F5H8B0;P08709;P08709-2	F7	Coagulation factor VII;Coagulation factor VII;Isoform B of Coagulation factor VII	F5H8B0_HUMAN;FA7_HUMAN;FA7_HUMAN	4	-15.8401	0.841599	Zika	Dengue	NaN	NaN	NaN
Zika / Dengue	D6R934;P02746	D6R934;P02746	0.0414949	0.0414949	0.643292	0.209349	244	D6R934;P02746	C1QB	Complement C1q subcomponent subunit B	D6R934_HUMAN;C1QB_HUMAN	13	2.91797	1.02918	Zika	Dengue	NaN	NaN	NaN
Zika / Dengue	J3KRP0	J3KRP0	0.00612774	0.00612774	0.662293	0.214375	128	J3KRP0	CNDP1	Beta-Ala-His dipeptidase	J3KRP0_HUMAN	1	0.425646	1.00426	Zika	Dengue	NaN	NaN	NaN
Zika / Dengue	I3L3H7;P02452	I3L3H7;P02452	-0.0301125	0.0301125	0.662377	0.214375	36	I3L3H7;P02452	COL1A1	Collagen alpha-1(I) chain (Fragment);Collagen alpha-1(I) chain	I3L3H7_HUMAN;CO1A1_HUMAN	3	-2.06561	0.979344	Zika	Dengue	NaN	NaN	NaN
Zika / Dengue	A0A0B4J1Y9	A0A0B4J1Y9	-0.0647615	0.0647615	0.6644	0.214861	244	A0A0B4J1Y9	IGHV3-72	Immunoglobulin heavy variable 3-72	HV372_HUMAN	11	-4.38966	0.956103	Zika	Dengue	NaN	NaN	NaN
Zika / Dengue	P01699	P01699	0.0944265	0.0944265	0.667369	0.215652	244	P01699	IGLV1-44	Immunoglobulin lambda variable 1-44	LV144_HUMAN	3	6.7641	1.06764	Zika	Dengue	NaN	NaN	NaN
Zika / Dengue	P00338;P00338-3	P00338;P00338-3	-0.0333884	0.0333884	0.669334	0.215948	164	P00338;P00338-3	LDHA	L-lactate dehydrogenase A chain;Isoform 3 of L-lactate dehydrogenase A chain	LDHA_HUMAN	9	-2.28773	0.977123	Zika	Dengue	NaN	NaN	NaN
Zika / Dengue	J3KPA1;P54108;P54108-2;P54108-3	J3KPA1;P54108;P54108-2;P54108-3	-0.00761148	0.00761148	0.673501	0.216377	164	J3KPA1;P54108;P54108-2;P54108-3	CRISP3	Cysteine-rich secretory protein 3;Cysteine-rich secretory protein 3;Isoform 2 of Cysteine-rich secretory protein 3;Isoform 3 of Cysteine-rich secretory protein 3	J3KPA1_HUMAN;CRIS3_HUMAN;CRIS3_HUMAN;CRIS3_HUMAN	7	-0.526199	0.994738	Zika	Dengue	NaN	NaN	NaN
Zika / Dengue	E9PKE3;P11142	E9PKE3;P11142	-0.131939	0.131939	0.674341	0.216377	64	E9PKE3;P11142	HSPA8	Heat shock cognate 71 kDa protein	E9PKE3_HUMAN;HSP7C_HUMAN	13	-8.73959	0.912604	Zika	Dengue	NaN	NaN	NaN
Zika / Dengue	P01714	P01714	-0.0553075	0.0553075	0.675126	0.216461	240	P01714	IGLV3-19	Immunoglobulin lambda variable 3-19	LV319_HUMAN	7	-3.76107	0.962389	Zika	Dengue	NaN	NaN	NaN
Zika / Dengue	A0A0C4DH42;P01767	A0A0C4DH42;P01767	-0.182937	0.182937	0.681524	0.218151	102	A0A0C4DH42;P01767	IGHV3-66;IGHV3-53	Immunoglobulin heavy variable 3-66;Immunoglobulin heavy variable 3-53	HV366_HUMAN;HV353_HUMAN	1	-11.9092	0.880908	Zika	Dengue	NaN	NaN	NaN
Zika / Dengue	P01599	P01599	0.0248766	0.0248766	0.686236	0.21934	240	P01599	IGKV1-17	Immunoglobulin kappa variable 1-17	KV117_HUMAN	2	1.73927	1.01739	Zika	Dengue	NaN	NaN	NaN
Zika / Dengue	O75594	O75594	-0.0206537	0.0206537	0.696239	0.220824	36	O75594	PGLYRP1	Peptidoglycan recognition protein 1	PGRP1_HUMAN	4	-1.42141	0.985786	Zika	Dengue	NaN	NaN	NaN
Zika / Dengue	O60814;P06899;P23527;P33778;P57053;P58876;P62807;Q16778;Q5QNW6;Q5QNW6-2;Q8N257;Q93079;Q99877;Q99879;Q99880;U3KQK0	O60814;P06899;P23527;P33778;P57053;P58876;P62807;Q16778;Q5QNW6;Q5QNW6-2;Q8N257;Q93079;Q99877;Q99879;Q99880;U3KQK0	0.0433596	0.0433596	0.698667	0.221424	130	O60814;P06899;P23527;P33778;P57053;P58876;P62807;Q16778;Q5QNW6;Q5QNW6-2;Q8N257;Q93079;Q99877;Q99879;Q99880;U3KQK0	HIST1H2BK;HIST1H2BJ;HIST1H2BO;HIST1H2BB;H2BFS;HIST1H2BD;HIST1H2BC;HIST2H2BE;HIST2H2BF;HIST2H2BF;HIST3H2BB;HIST1H2BH;HIST1H2BN;HIST1H2BM;HIST1H2BL;HIST1H2BN	Histone H2B type 1-K;Histone H2B type 1-J;Histone H2B type 1-O;Histone H2B type 1-B;Histone H2B type F-S;Histone H2B type 1-D;Histone H2B type 1-C/E/F/G/I;Histone H2B type 2-E;Histone H2B type 2-F;Isoform 2 of Histone H2B type 2-F;Histone H2B type 3-B;Histone H2B type 1-H;Histone H2B type 1-N;Histone H2B type 1-M;Histone H2B type 1-L;Histone H2B	H2B1K_HUMAN;H2B1J_HUMAN;H2B1O_HUMAN;H2B1B_HUMAN;H2BFS_HUMAN;H2B1D_HUMAN;H2B1C_HUMAN;H2B2E_HUMAN;H2B2F_HUMAN;H2B2F_HUMAN;H2B3B_HUMAN;H2B1H_HUMAN;H2B1N_HUMAN;H2B1M_HUMAN;H2B1L_HUMAN;U3KQK0_HUMAN	4	3.05108	1.03051	Zika	Dengue	NaN	NaN	NaN
Zika / Dengue	Q9UGM5	Q9UGM5	-0.0948184	0.0948184	0.706772	0.223477	244	Q9UGM5	FETUB	Fetuin-B	FETUB_HUMAN	12	-6.36099	0.93639	Zika	Dengue	NaN	NaN	NaN
Zika / Dengue	P81172	P81172	0.0510216	0.0510216	0.717228	0.226089	18	P81172	HAMP	Hepcidin	HEPC_HUMAN	1	3.59983	1.036	Zika	Dengue	NaN	NaN	NaN
Zika / Dengue	A0A087X1J7;P22352	A0A087X1J7;P22352	-0.0672121	0.0672121	0.717953	0.226129	244	A0A087X1J7;P22352	GPX3	Glutathione peroxidase;Glutathione peroxidase 3	A0A087X1J7_HUMAN;GPX3_HUMAN	9	-4.55193	0.954481	Zika	Dengue	NaN	NaN	NaN
Zika / Dengue	A0A087WYE8;A0A0B4J2B8	A0A087WYE8;A0A0B4J2B8	-0.321841	0.321841	0.721812	0.226667	108	A0A087WYE8;A0A0B4J2B8	IGHV1OR21-1;IGHV1OR15-9	Immunoglobulin heavy variable 1/OR21-1 (non-functional) (Fragment);Immunoglobulin heavy variable 1/OR15-9 (non-functional) (Fragment)	A0A087WYE8_HUMAN;A0A0B4J2B8_HUMAN	1	-19.9952	0.800048	Zika	Dengue	NaN	NaN	NaN
Zika / Dengue	P08238	P08238	0.257135	0.257135	0.722521	0.226716	12	P08238	HSP90AB1	Heat shock protein HSP 90-beta	HS90B_HUMAN	3	19.5103	1.1951	Zika	Dengue	NaN	NaN	NaN
Zika / Dengue	P08253;P08253-2;P08253-3	P08253;P08253-2;P08253-3	-0.278089	0.278089	0.72963	0.228425	82	P08253;P08253-2;P08253-3	MMP2	72 kDa type IV collagenase;Isoform 2 of 72 kDa type IV collagenase;Isoform 3 of 72 kDa type IV collagenase	MMP2_HUMAN	8	-17.5317	0.824683	Zika	Dengue	NaN	NaN	NaN
Zika / Dengue	P21333;P21333-2;Q5HY54	P21333;P21333-2;Q5HY54	0.172376	0.172376	0.770033	0.239437	138	P21333;P21333-2;Q5HY54	FLNA	Filamin-A;Isoform 2 of Filamin-A;Filamin-A	FLNA_HUMAN;FLNA_HUMAN;Q5HY54_HUMAN	23	12.6913	1.12691	Zika	Dengue	NaN	NaN	NaN
Zika / Dengue	Q92820	Q92820	0.120195	0.120195	0.796773	0.246449	102	Q92820	GGH	Gamma-glutamyl hydrolase	GGH_HUMAN	6	8.68819	1.08688	Zika	Dengue	NaN	NaN	NaN
Zika / Dengue	A0A0B4J1U3	A0A0B4J1U3	0.0298071	0.0298071	0.799067	0.246905	232	A0A0B4J1U3	IGLV1-36	Immunoglobulin lambda variable 1-36	LV136_HUMAN	3	2.08756	1.02088	Zika	Dengue	NaN	NaN	NaN
Zika / Dengue	K7EKL3;P28799;P28799-2;P28799-3	K7EKL3;P28799;P28799-2;P28799-3	-0.077352	0.077352	0.800466	0.247035	54	K7EKL3;P28799;P28799-2;P28799-3	GRN	Granulins (Fragment);Granulins;Isoform 2 of Granulins;Isoform 3 of Granulins	K7EKL3_HUMAN;GRN_HUMAN;GRN_HUMAN;GRN_HUMAN	2	-5.22043	0.947796	Zika	Dengue	NaN	NaN	NaN
Zika / Dengue	Q5TFM2	Q5TFM2	0.0809972	0.0809972	0.805735	0.248289	102	Q5TFM2	CFH	Complement factor H	Q5TFM2_HUMAN	3	5.77489	1.05775	Zika	Dengue	NaN	NaN	NaN
Zika / Dengue	Q9Y490	Q9Y490	-0.185439	0.185439	0.806972	0.248485	62	Q9Y490	TLN1	Talin-1	TLN1_HUMAN	35	-12.0619	0.879381	Zika	Dengue	NaN	NaN	NaN
Zika / Dengue	P01624	P01624	0.0486978	0.0486978	0.809405	0.249048	244	P01624	IGKV3-15	Immunoglobulin kappa variable 3-15	KV315_HUMAN	3	3.43309	1.03433	Zika	Dengue	NaN	NaN	NaN
Zika / Dengue	B4E1Z4	B4E1Z4	0.0388251	0.0388251	0.814099	0.249973	244	B4E1Z4	NaN	cDNA FLJ55673, highly similar to Complement factor B (EC 3.4.21.47)	B4E1Z4_HUMAN	99	2.72769	1.02728	Zika	Dengue	NaN	NaN	NaN
Zika / Dengue	A0A0A0MS09;P01880;P01880-2	A0A0A0MS09;P01880;P01880-2	-0.0115416	0.0115416	0.817752	0.250867	200	A0A0A0MS09;P01880;P01880-2	IGHD	Immunoglobulin heavy constant delta (Fragment);Immunoglobulin heavy constant delta;Isoform 2 of Immunoglobulin heavy constant delta	A0A0A0MS09_HUMAN;IGHD_HUMAN;IGHD_HUMAN	17	-0.796811	0.992032	Zika	Dengue	NaN	NaN	NaN
Zika / Dengue	Q9UHG3	Q9UHG3	-0.0504258	0.0504258	0.828218	0.253135	150	Q9UHG3	PCYOX1	Prenylcysteine oxidase 1	PCYOX_HUMAN	7	-3.43487	0.965651	Zika	Dengue	NaN	NaN	NaN
Zika / Dengue	P28072	P28072	-0.627824	0.627824	0.827806	0.253135	12	P28072	PSMB6	Proteasome subunit beta type-6	PSB6_HUMAN	3	-35.2848	0.647152	Zika	Dengue	NaN	NaN	NaN
Zika / Dengue	P20742	P20742	-0.000211088	0.000211088	0.846412	0.257359	210	P20742	PZP	Pregnancy zone protein	PZP_HUMAN	49	-0.0146305	0.999854	Zika	Dengue	NaN	NaN	NaN
Zika / Dengue	P00558	P00558	0.268063	0.268063	0.848875	0.25766	12	P00558	PGK1	Phosphoglycerate kinase 1	PGK1_HUMAN	11	20.419	1.20419	Zika	Dengue	NaN	NaN	NaN
Zika / Dengue	P04211	P04211	0.0499138	0.0499138	0.851941	0.257914	244	P04211	IGLV7-43	Immunoglobulin lambda variable 7-43	LV743_HUMAN	5	3.52031	1.0352	Zika	Dengue	NaN	NaN	NaN
Zika / Dengue	A0A0B4J269;G3V2A3;P07437;P68371;Q13509;Q13509-2;Q5JP53;Q5ST81	A0A0B4J269;G3V2A3;P07437;P68371;Q13509;Q13509-2;Q5JP53;Q5ST81	-0.453782	0.453782	0.851991	0.257914	14	A0A0B4J269;G3V2A3;P07437;P68371;Q13509;Q13509-2;Q5JP53;Q5ST81	;TUBB3;TUBB;TUBB4B;TUBB3;TUBB3;TUBB;TUBB	Uncharacterized protein;Tubulin beta chain (Fragment);Tubulin beta chain;Tubulin beta-4B chain;Tubulin beta-3 chain;Isoform 2 of Tubulin beta-3 chain;Tubulin beta chain;Tubulin beta chain	A0A0B4J269_HUMAN;G3V2A3_HUMAN;TBB5_HUMAN;TBB4B_HUMAN;TBB3_HUMAN;TBB3_HUMAN;Q5JP53_HUMAN;Q5ST81_HUMAN	3	-26.9873	0.730127	Zika	Dengue	NaN	NaN	NaN
Zika / Dengue	P01009	P01009	0.0633371	0.0633371	0.877776	0.264746	244	P01009	SERPINA1	Alpha-1-antitrypsin	A1AT_HUMAN	55	4.48799	1.04488	Zika	Dengue	NaN	NaN	NaN
Zika / Dengue	P05019;P05019-2;P05019-3;P05019-4;Q13429	P05019;P05019-2;P05019-3;P05019-4;Q13429	-0.116118	0.116118	0.879774	0.264961	100	P05019;P05019-2;P05019-3;P05019-4;Q13429	IGF1	Insulin-like growth factor I;Isoform 2 of Insulin-like growth factor I;Isoform 3 of Insulin-like growth factor I;Isoform 4 of Insulin-like growth factor I;Insulin-like growth factor I (Fragment)	IGF1_HUMAN;IGF1_HUMAN;IGF1_HUMAN;IGF1_HUMAN;Q13429_HUMAN	2	-7.73332	0.922667	Zika	Dengue	NaN	NaN	NaN
Zika / Dengue	P15814	P15814	0.27601	0.27601	0.880655	0.265033	244	P15814	IGLL1	Immunoglobulin lambda-like polypeptide 1	IGLL1_HUMAN	4	21.0842	1.21084	Zika	Dengue	NaN	NaN	NaN
Zika / Dengue	A0A087WWU8;P06753-2	A0A087WWU8;P06753-2	-0.080976	0.080976	0.891061	0.267746	128	A0A087WWU8;P06753-2	TPM3	Tropomyosin alpha-3 chain;Isoform 2 of Tropomyosin alpha-3 chain	A0A087WWU8_HUMAN;TPM3_HUMAN	17	-5.45821	0.945418	Zika	Dengue	NaN	NaN	NaN
Zika / Dengue	P01703	P01703	0.11707	0.11707	0.894008	0.268267	242	P01703	IGLV1-40	Immunoglobulin lambda variable 1-40	LV140_HUMAN	5	8.45298	1.08453	Zika	Dengue	NaN	NaN	NaN
Zika / Dengue	P23381	P23381	-0.0972918	0.0972918	0.902245	0.270149	30	P23381	WARS	Tryptophan--tRNA ligase, cytoplasmic	SYWC_HUMAN	4	-6.52139	0.934786	Zika	Dengue	NaN	NaN	NaN
Zika / Dengue	Q9UNW1	Q9UNW1	0.185082	0.185082	0.908077	0.271501	64	Q9UNW1	MINPP1	Multiple inositol polyphosphate phosphatase 1	MINP1_HUMAN	5	13.6882	1.13688	Zika	Dengue	NaN	NaN	NaN
Zika / Dengue	A0A087WYK1;Q00887	A0A087WYK1;Q00887	0.72346	0.72346	0.920446	0.274601	34	A0A087WYK1;Q00887	PSG9	Pregnancy-specific beta-1-glycoprotein 9	A0A087WYK1_HUMAN;PSG9_HUMAN	3	65.1137	1.65114	Zika	Dengue	NaN	NaN	NaN
Zika / Dengue	A0A0B4J1V6	A0A0B4J1V6	-0.180747	0.180747	0.921415	0.274691	212	A0A0B4J1V6	IGHV3-73	Immunoglobulin heavy variable 3-73	HV373_HUMAN	4	-11.7754	0.882246	Zika	Dengue	NaN	NaN	NaN
Zika / Dengue	P06310	P06310	0.0451725	0.0451725	0.925177	0.275414	244	P06310	IGKV2-30	Immunoglobulin kappa variable 2-30	KV230_HUMAN	6	3.18066	1.03181	Zika	Dengue	NaN	NaN	NaN
Zika / Dengue	A0A024R6I7	A0A024R6I7	-0.00115665	0.00115665	0.927553	0.275922	124	A0A024R6I7	SERPINA1	Alpha-1-antitrypsin	A0A024R6I7_HUMAN	3	-0.0801411	0.999199	Zika	Dengue	NaN	NaN	NaN
Zika / Dengue	P20618	P20618	0.0586106	0.0586106	0.933694	0.277548	26	P20618	PSMB1	Proteasome subunit beta type-1	PSB1_HUMAN	1	4.14623	1.04146	Zika	Dengue	NaN	NaN	NaN
Zika / Dengue	P30041	P30041	-1.34505	1.34505	0.936458	0.278169	26	P30041	PRDX6	Peroxiredoxin-6	PRDX6_HUMAN	5	-60.636	0.39364	Zika	Dengue	NaN	NaN	NaN
Zika / Dengue	A0A0C4DH34	A0A0C4DH34	0.0865662	0.0865662	0.942486	0.279758	244	A0A0C4DH34	IGHV4-28	Immunoglobulin heavy variable 4-28	HV428_HUMAN	5	6.18399	1.06184	Zika	Dengue	NaN	NaN	NaN
Zika / Dengue	A0A0C4DH33	A0A0C4DH33	-0.111855	0.111855	0.946107	0.280631	234	A0A0C4DH33	IGHV1-24	Immunoglobulin heavy variable 1-24	HV124_HUMAN	3	-7.46028	0.925397	Zika	Dengue	NaN	NaN	NaN
Zika / Dengue	B7ZKJ8	B7ZKJ8	-0.00821779	0.00821779	0.950282	0.281464	100	B7ZKJ8	ITIH4	ITIH4 protein	B7ZKJ8_HUMAN	1	-0.567995	0.99432	Zika	Dengue	NaN	NaN	NaN
Zika / Dengue	P08603	P08603	-0.00343657	0.00343657	0.963539	0.284368	244	P08603	CFH	Complement factor H	CFAH_HUMAN	118	-0.237922	0.997621	Zika	Dengue	NaN	NaN	NaN
Zika / Dengue	P80723;P80723-2	P80723;P80723-2	-1.12651	1.12651	0.969314	0.285675	34	P80723;P80723-2	BASP1	Brain acid soluble protein 1;Isoform 2 of Brain acid soluble protein 1	BASP1_HUMAN	4	-54.1977	0.458023	Zika	Dengue	NaN	NaN	NaN
Zika / Dengue	P01721	P01721	-0.0742558	0.0742558	0.969355	0.285675	184	P01721	IGLV6-57	Immunoglobulin lambda variable 6-57	LV657_HUMAN	2	-5.01681	0.949832	Zika	Dengue	NaN	NaN	NaN
Zika / Dengue	E7ETH0;G3XAM2;P05156	E7ETH0;G3XAM2;P05156	-0.013499	0.013499	0.9856	0.290048	244	E7ETH0;G3XAM2;P05156	CFI	Complement factor I	E7ETH0_HUMAN;G3XAM2_HUMAN;CFAI_HUMAN	29	-0.931314	0.990687	Zika	Dengue	NaN	NaN	NaN
Zika / Dengue	O95445	O95445	0.0376389	0.0376389	0.98833	0.290644	244	O95445	APOM	Apolipoprotein M	APOM_HUMAN	17	2.64326	1.02643	Zika	Dengue	NaN	NaN	NaN
Zika / Dengue	P01857	P01857	0.0360262	0.0360262	0.994011	0.291674	244	P01857	IGHG1	Immunoglobulin heavy constant gamma 1	IGHG1_HUMAN	41	2.52858	1.02529	Zika	Dengue	NaN	NaN	NaN
Zika / Dengue	P13727	P13727	-0.062796	0.062796	0.993343	0.291674	44	P13727	PRG2	Bone marrow proteoglycan	PRG2_HUMAN	5	-4.25932	0.957407	Zika	Dengue	NaN	NaN	NaN
Zika / QC	P02675	P02675	-3.68497	3.68497	2.0014e-28	2.74859e-26	122	P02675	FGB	Fibrinogen beta chain	FIBB_HUMAN	53	-92.2248	0.0777523	Zika	QC	NaN	NaN	NaN
Zika / QC	P02679;P02679-2	P02679;P02679-2	-3.52671	3.52671	4.01995e-28	3.39293e-26	120	P02679;P02679-2	FGG	Fibrinogen gamma chain;Isoform Gamma-A of Fibrinogen gamma chain	FIBG_HUMAN	48	-91.3233	0.086767	Zika	QC	NaN	NaN	NaN
Zika / QC	P80108	P80108	0.755453	0.755453	4.11763e-28	3.39293e-26	148	P80108	GPLD1	Phosphatidylinositol-glycan-specific phospholipase D	PHLD_HUMAN	25	68.8162	1.68816	Zika	QC	NaN	NaN	NaN
Zika / QC	P05062	P05062	-2.30095	2.30095	4.04953e-24	2.08551e-22	58	P05062	ALDOB	Fructose-bisphosphate aldolase B	ALDOB_HUMAN	11	-79.707	0.20293	Zika	QC	NaN	NaN	NaN
Zika / QC	Q5TFM2	Q5TFM2	1.4819	1.4819	1.96669e-22	9.00306e-21	68	Q5TFM2	CFH	Complement factor H	Q5TFM2_HUMAN	3	179.317	2.79317	Zika	QC	NaN	NaN	NaN
Zika / QC	A0A0C4DGB6	A0A0C4DGB6	1.08952	1.08952	6.16348e-21	2.3085e-19	76	A0A0C4DGB6	ALB	Serum albumin	A0A0C4DGB6_HUMAN	1	112.803	2.12803	Zika	QC	NaN	NaN	NaN
Zika / QC	P02766	P02766	0.936665	0.936665	4.26158e-20	1.46314e-18	148	P02766	TTR	Transthyretin	TTHY_HUMAN	16	91.4098	1.9141	Zika	QC	NaN	NaN	NaN
Zika / QC	P06727	P06727	0.813523	0.813523	4.93579e-20	1.56427e-18	148	P06727	APOA4	Apolipoprotein A-IV	APOA4_HUMAN	51	75.7498	1.7575	Zika	QC	NaN	NaN	NaN
Zika / QC	P04275	P04275	-0.814924	0.814924	9.99676e-20	2.9419e-18	148	P04275	VWF	von Willebrand factor	VWF_HUMAN	110	-43.1561	0.568439	Zika	QC	NaN	NaN	NaN
Zika / QC	P0DJI8	P0DJI8	-1.67943	1.67943	1.2255e-17	3.36605e-16	148	P0DJI8	SAA1	Serum amyloid A-1 protein	SAA1_HUMAN	14	-68.7794	0.312206	Zika	QC	NaN	NaN	NaN
Zika / QC	P62805	P62805	1.19211	1.19211	1.68523e-17	4.33948e-16	62	P62805	HIST1H4A	Histone H4	H4_HUMAN	5	128.487	2.28487	Zika	QC	NaN	NaN	NaN
Zika / QC	P11226	P11226	1.13691	1.13691	1.8878e-17	4.57513e-16	72	P11226	MBL2	Mannose-binding protein C	MBL2_HUMAN	6	119.909	2.19909	Zika	QC	NaN	NaN	NaN
Zika / QC	E9PFZ2	E9PFZ2	1.42468	1.42468	1.50737e-16	3.10517e-15	120	E9PFZ2	CP	Ceruloplasmin	E9PFZ2_HUMAN	2	168.455	2.68455	Zika	QC	NaN	NaN	NaN
Zika / QC	A0A075B6H7	A0A075B6H7	0.859013	0.859013	6.60379e-16	1.18294e-14	92	A0A075B6H7	IGKV3-7	Immunoglobulin kappa variable 3-7 (non-functional) (Fragment)	A0A075B6H7_HUMAN	1	81.3797	1.8138	Zika	QC	NaN	NaN	NaN
Zika / QC	P02647	P02647	0.545332	0.545332	1.67798e-15	2.88053e-14	148	P02647	APOA1	Apolipoprotein A-I	APOA1_HUMAN	52	45.9356	1.45936	Zika	QC	NaN	NaN	NaN
Zika / QC	Q6UXB8;Q6UXB8-2	Q6UXB8;Q6UXB8-2	0.518194	0.518194	2.35525e-14	3.23455e-13	126	Q6UXB8;Q6UXB8-2	PI16	Peptidase inhibitor 16;Isoform 2 of Peptidase inhibitor 16	PI16_HUMAN	9	43.2161	1.43216	Zika	QC	NaN	NaN	NaN
Zika / QC	P02775	P02775	0.626981	0.626981	3.04277e-14	3.91757e-13	148	P02775	PPBP	Platelet basic protein	CXCL7_HUMAN	7	54.433	1.54433	Zika	QC	NaN	NaN	NaN
Zika / QC	P41222	P41222	-0.582796	0.582796	5.10855e-14	6.19036e-13	126	P41222	PTGDS	Prostaglandin-H2 D-isomerase	PTGDS_HUMAN	5	-33.2331	0.667669	Zika	QC	NaN	NaN	NaN
Zika / QC	P01023	P01023	-0.485334	0.485334	7.11458e-14	8.37488e-13	148	P01023	A2M	Alpha-2-macroglobulin	A2MG_HUMAN	162	-28.5668	0.714332	Zika	QC	NaN	NaN	NaN
Zika / QC	P02671	P02671	-0.900561	0.900561	8.8939e-14	1.01786e-12	148	P02671	FGA	Fibrinogen alpha chain	FIBA_HUMAN	73	-46.4322	0.535678	Zika	QC	NaN	NaN	NaN
Zika / QC	P40197	P40197	1.16943	1.16943	1.1068e-13	1.20001e-12	86	P40197	GP5	Platelet glycoprotein V	GPV_HUMAN	9	124.922	2.24922	Zika	QC	NaN	NaN	NaN
Zika / QC	P09486	P09486	1.38697	1.38697	1.22219e-13	1.29113e-12	120	P09486	SPARC	SPARC	SPRC_HUMAN	10	161.529	2.61529	Zika	QC	NaN	NaN	NaN
Zika / QC	P60174;P60174-1;P60174-4	P60174;P60174-1;P60174-4	1.12239	1.12239	5.79216e-13	5.82041e-12	52	P60174;P60174-1;P60174-4	TPI1	Triosephosphate isomerase;Isoform 2 of Triosephosphate isomerase;Isoform 4 of Triosephosphate isomerase	TPIS_HUMAN	4	117.708	2.17708	Zika	QC	NaN	NaN	NaN
Zika / QC	P00918	P00918	2.26584	2.26584	9.05903e-12	8.29405e-11	100	P00918	CA2	Carbonic anhydrase 2	CAH2_HUMAN	9	380.934	4.80934	Zika	QC	NaN	NaN	NaN
Zika / QC	P02753;Q5VY30	P02753;Q5VY30	0.531275	0.531275	1.05258e-11	9.22689e-11	148	P02753;Q5VY30	RBP4	Retinol-binding protein 4;Retinol binding protein 4, plasma, isoform CRA_b	RET4_HUMAN;Q5VY30_HUMAN	19	44.5206	1.44521	Zika	QC	NaN	NaN	NaN
Zika / QC	P05154	P05154	2.34501	2.34501	1.12021e-11	9.61515e-11	60	P05154	SERPINA5	Plasma serine protease inhibitor	IPSP_HUMAN	5	408.063	5.08063	Zika	QC	NaN	NaN	NaN
Zika / QC	E7EPG1;Q13201	E7EPG1;Q13201	0.720974	0.720974	7.21083e-11	5.6054e-10	98	E7EPG1;Q13201	MMRN1	Multimerin-1	E7EPG1_HUMAN;MMRN1_HUMAN	4	64.8295	1.64829	Zika	QC	NaN	NaN	NaN
Zika / QC	P07998	P07998	-0.705178	0.705178	8.95396e-11	6.70733e-10	74	P07998	RNASE1	Ribonuclease pancreatic	RNAS1_HUMAN	3	-38.6633	0.613367	Zika	QC	NaN	NaN	NaN
Zika / QC	P01715	P01715	0.919783	0.919783	9.77078e-11	7.06239e-10	112	P01715	IGLV3-1	Immunoglobulin lambda variable 3-1	LV301_HUMAN	2	89.1831	1.89183	Zika	QC	NaN	NaN	NaN
Zika / QC	P02741	P02741	-0.944628	0.944628	1.74565e-10	1.17225e-09	138	P02741	CRP	C-reactive protein	CRP_HUMAN	10	-48.0437	0.519563	Zika	QC	NaN	NaN	NaN
Zika / QC	P80748	P80748	-0.744974	0.744974	1.7323e-10	1.17225e-09	148	P80748	IGLV3-21	Immunoglobulin lambda variable 3-21	LV321_HUMAN	3	-40.3321	0.596679	Zika	QC	NaN	NaN	NaN
Zika / QC	P03951;P03951-2	P03951;P03951-2	0.857599	0.857599	2.26841e-10	1.48347e-09	130	P03951;P03951-2	F11	Coagulation factor XI;Isoform 2 of Coagulation factor XI	FA11_HUMAN	17	81.202	1.81202	Zika	QC	NaN	NaN	NaN
Zika / QC	H0YAC1;P03952	H0YAC1;P03952	0.336253	0.336253	2.43094e-10	1.56492e-09	148	H0YAC1;P03952	KLKB1	Plasma kallikrein (Fragment);Plasma kallikrein	H0YAC1_HUMAN;KLKB1_HUMAN	38	26.2473	1.26247	Zika	QC	NaN	NaN	NaN
Zika / QC	P00915	P00915	1.2138	1.2138	3.14578e-10	1.99394e-09	126	P00915	CA1	Carbonic anhydrase 1	CAH1_HUMAN	9	131.948	2.31948	Zika	QC	NaN	NaN	NaN
Zika / QC	P22891;P22891-2	P22891;P22891-2	0.431017	0.431017	3.95768e-10	2.47055e-09	138	P22891;P22891-2	PROZ	Vitamin K-dependent protein Z;Isoform 2 of Vitamin K-dependent protein Z	PROZ_HUMAN	10	34.8184	1.34818	Zika	QC	NaN	NaN	NaN
Zika / QC	E7EX29;P63104	E7EX29;P63104	0.854405	0.854405	5.51078e-10	3.38872e-09	42	E7EX29;P63104	YWHAZ	14-3-3 protein zeta/delta (Fragment);14-3-3 protein zeta/delta	E7EX29_HUMAN;1433Z_HUMAN	4	80.8013	1.80801	Zika	QC	NaN	NaN	NaN
Zika / QC	P02750	P02750	-0.635064	0.635064	9.00868e-10	5.22757e-09	148	P02750	LRG1	Leucine-rich alpha-2-glycoprotein	A2GL_HUMAN	20	-35.6088	0.643912	Zika	QC	NaN	NaN	NaN
Zika / QC	P59665;P59666	P59665;P59666	-0.678131	0.678131	9.72831e-10	5.56676e-09	146	P59665;P59666	DEFA1;DEFA3	Neutrophil defensin 1;Neutrophil defensin 3	DEF1_HUMAN;DEF3_HUMAN	5	-37.5026	0.624974	Zika	QC	NaN	NaN	NaN
Zika / QC	P02790	P02790	0.364459	0.364459	1.0053e-09	5.67372e-09	148	P02790	HPX	Hemopexin	HEMO_HUMAN	50	28.7398	1.2874	Zika	QC	NaN	NaN	NaN
Zika / QC	P00488	P00488	0.232637	0.232637	2.37636e-09	1.27151e-08	108	P00488	F13A1	Coagulation factor XIII A chain	F13A_HUMAN	22	17.4981	1.17498	Zika	QC	NaN	NaN	NaN
Zika / QC	P01011	P01011	-0.43905	0.43905	2.80323e-09	1.46194e-08	148	P01011	SERPINA3	Alpha-1-antichymotrypsin	AACT_HUMAN	39	-26.238	0.73762	Zika	QC	NaN	NaN	NaN
Zika / QC	P10720	P10720	0.641526	0.641526	3.47969e-09	1.77626e-08	148	P10720	PF4V1	Platelet factor 4 variant	PF4V_HUMAN	7	55.9978	1.55998	Zika	QC	NaN	NaN	NaN
Zika / QC	A0A0C4DH31	A0A0C4DH31	-0.468324	0.468324	3.49216e-09	1.77626e-08	148	A0A0C4DH31	IGHV1-18	Immunoglobulin heavy variable 1-18	HV118_HUMAN	4	-27.7196	0.722804	Zika	QC	NaN	NaN	NaN
Zika / QC	P05546	P05546	0.304015	0.304015	3.67388e-09	1.8459e-08	148	P05546	SERPIND1	Heparin cofactor 2	HEP2_HUMAN	30	23.4575	1.23458	Zika	QC	NaN	NaN	NaN
Zika / QC	P68871	P68871	1.96427	1.96427	4.32446e-09	2.12104e-08	148	P68871	HBB	Hemoglobin subunit beta	HBB_HUMAN	23	290.215	3.90215	Zika	QC	NaN	NaN	NaN
Zika / QC	P69905	P69905	1.80008	1.80008	6.04444e-09	2.89571e-08	148	P69905	HBA1	Hemoglobin subunit alpha	HBA_HUMAN	23	248.241	3.48241	Zika	QC	NaN	NaN	NaN
Zika / QC	P27105	P27105	4.4248	4.4248	6.62202e-09	3.10031e-08	28	P27105	STOM	Erythrocyte band 7 integral membrane protein	STOM_HUMAN	4	2047.82	21.4782	Zika	QC	NaN	NaN	NaN
Zika / QC	A0M8Q6	A0M8Q6	1.26929	1.26929	9.08664e-09	4.05664e-08	134	A0M8Q6	IGLC7	Immunoglobulin lambda constant 7	IGLC7_HUMAN	4	141.043	2.41043	Zika	QC	NaN	NaN	NaN
Zika / QC	Q08211	Q08211	-0.844302	0.844302	9.15698e-09	4.05664e-08	132	Q08211	DHX9	ATP-dependent RNA helicase A	DHX9_HUMAN	2	-44.302	0.55698	Zika	QC	NaN	NaN	NaN
Zika / QC	I3L3H7;P02452	I3L3H7;P02452	1.49044	1.49044	9.07347e-09	4.05664e-08	22	I3L3H7;P02452	COL1A1	Collagen alpha-1(I) chain (Fragment);Collagen alpha-1(I) chain	I3L3H7_HUMAN;CO1A1_HUMAN	3	180.974	2.80974	Zika	QC	NaN	NaN	NaN
Zika / QC	H0Y2P0;H0Y5E4;H0YCV9;H0YDW7;H0YDX6;P16070;P16070-10;P16070-11;P16070-12;P16070-13;P16070-14;P16070-15;P16070-16;P16070-17;P16070-18;P16070-3;P16070-4;P16070-5;P16070-6;P16070-7;P16070-8;P16070-9	H0Y2P0;H0Y5E4;H0YCV9;H0YDW7;H0YDX6;P16070;P16070-10;P16070-11;P16070-12;P16070-13;P16070-14;P16070-15;P16070-16;P16070-17;P16070-18;P16070-3;P16070-4;P16070-5;P16070-6;P16070-7;P16070-8;P16070-9	-0.36278	0.36278	1.48322e-08	6.29984e-08	144	H0Y2P0;H0Y5E4;H0YCV9;H0YDW7;H0YDX6;P16070;P16070-10;P16070-11;P16070-12;P16070-13;P16070-14;P16070-15;P16070-16;P16070-17;P16070-18;P16070-3;P16070-4;P16070-5;P16070-6;P16070-7;P16070-8;P16070-9	CD44	CD44 antigen (Fragment);CD44 antigen (Fragment);CD44 antigen (Fragment);CD44 antigen (Fragment);CD44 antigen (Fragment);CD44 antigen;Isoform 10 of CD44 antigen;Isoform 11 of CD44 antigen;Isoform 12 of CD44 antigen;Isoform 13 of CD44 antigen;Isoform 14 of CD44 antigen;Isoform 15 of CD44 antigen;Isoform 16 of CD44 antigen;Isoform 17 of CD44 antigen;Isoform 18 of CD44 antigen;Isoform 3 of CD44 antig…	H0Y2P0_HUMAN;H0Y5E4_HUMAN;H0YCV9_HUMAN;H0YDW7_HUMAN;H0YDX6_HUMAN;CD44_HUMAN;CD44_HUMAN;CD44_HUMAN;CD44_HUMAN;CD44_HUMAN;CD44_HUMAN;CD44_HUMAN;CD44_HUMAN;CD44_HUMAN;CD44_HUMAN;CD44_HUMAN;CD44_HUMAN;CD44_HUMAN;CD44_HUMAN;CD44_HUMAN;CD44_HUMAN;CD44_HUMAN	4	-22.2335	0.777665	Zika	QC	NaN	NaN	NaN
Zika / QC	E7ESV4;F5H7Y6;P61224;P61224-3;P61224-4	E7ESV4;F5H7Y6;P61224;P61224-3;P61224-4	1.51492	1.51492	1.54346e-08	6.45012e-08	32	E7ESV4;F5H7Y6;P61224;P61224-3;P61224-4	RAP1B	Ras-related protein Rap-1b (Fragment);Ras-related protein Rap-1b;Ras-related protein Rap-1b;Isoform 3 of Ras-related protein Rap-1b;Isoform 4 of Ras-related protein Rap-1b	E7ESV4_HUMAN;F5H7Y6_HUMAN;RAP1B_HUMAN;RAP1B_HUMAN;RAP1B_HUMAN	3	185.783	2.85783	Zika	QC	NaN	NaN	NaN
Zika / QC	A0A182DWH7;P49908	A0A182DWH7;P49908	0.375935	0.375935	2.16711e-08	8.75341e-08	148	A0A182DWH7;P49908	SELENOP	Selenoprotein P (Fragment);Selenoprotein P	A0A182DWH7_HUMAN;SEPP1_HUMAN	9	29.7681	1.29768	Zika	QC	NaN	NaN	NaN
Zika / QC	A0A075B6H9	A0A075B6H9	0.835147	0.835147	2.38265e-08	9.53059e-08	144	A0A075B6H9	IGLV4-69	Immunoglobulin lambda variable 4-69	LV469_HUMAN	5	78.4039	1.78404	Zika	QC	NaN	NaN	NaN
Zika / QC	A0A087WYE8;A0A0B4J2B8	A0A087WYE8;A0A0B4J2B8	0.530135	0.530135	2.58807e-08	1.02528e-07	68	A0A087WYE8;A0A0B4J2B8	IGHV1OR21-1;IGHV1OR15-9	Immunoglobulin heavy variable 1/OR21-1 (non-functional) (Fragment);Immunoglobulin heavy variable 1/OR15-9 (non-functional) (Fragment)	A0A087WYE8_HUMAN;A0A0B4J2B8_HUMAN	1	44.4064	1.44406	Zika	QC	NaN	NaN	NaN
Zika / QC	P01833	P01833	0.382273	0.382273	3.10465e-08	1.19544e-07	130	P01833	PIGR	Polymeric immunoglobulin receptor	PIGR_HUMAN	17	30.3394	1.30339	Zika	QC	NaN	NaN	NaN
Zika / QC	P21333;P21333-2;Q5HY54	P21333;P21333-2;Q5HY54	0.655884	0.655884	3.36969e-08	1.27368e-07	98	P21333;P21333-2;Q5HY54	FLNA	Filamin-A;Isoform 2 of Filamin-A;Filamin-A	FLNA_HUMAN;FLNA_HUMAN;Q5HY54_HUMAN	23	57.5581	1.57558	Zika	QC	NaN	NaN	NaN
Zika / QC	Q6UX71	Q6UX71	0.867866	0.867866	1.10215e-07	3.75277e-07	56	Q6UX71	PLXDC2	Plexin domain-containing protein 2	PXDC2_HUMAN	7	82.4961	1.82496	Zika	QC	NaN	NaN	NaN
Zika / QC	P01703	P01703	-0.510454	0.510454	1.19032e-07	4.01976e-07	148	P01703	IGLV1-40	Immunoglobulin lambda variable 1-40	LV140_HUMAN	5	-29.7999	0.702001	Zika	QC	NaN	NaN	NaN
Zika / QC	A6XND0;A6XND1;P17936;P17936-2	A6XND0;A6XND1;P17936;P17936-2	0.545923	0.545923	1.57096e-07	5.21963e-07	148	A6XND0;A6XND1;P17936;P17936-2	IGFBP3	Insulin-like growth factor-binding protein 3;Insulin-like growth factor binding protein 3 isoform b;Insulin-like growth factor-binding protein 3;Isoform 2 of Insulin-like growth factor-binding protein 3	A6XND0_HUMAN;A6XND1_HUMAN;IBP3_HUMAN;IBP3_HUMAN	11	45.9954	1.45995	Zika	QC	NaN	NaN	NaN
Zika / QC	P19827	P19827	0.31371	0.31371	2.05821e-07	6.52293e-07	148	P19827	ITIH1	Inter-alpha-trypsin inhibitor heavy chain H1	ITIH1_HUMAN	53	24.29	1.2429	Zika	QC	NaN	NaN	NaN
Zika / QC	Q08380	Q08380	-0.572072	0.572072	2.25748e-07	6.78891e-07	148	Q08380	LGALS3BP	Galectin-3-binding protein	LG3BP_HUMAN	28	-32.735	0.67265	Zika	QC	NaN	NaN	NaN
Zika / QC	I3L145;P04278	I3L145;P04278	-0.425379	0.425379	2.28974e-07	6.83543e-07	146	I3L145;P04278	SHBG	Sex hormone-binding globulin	I3L145_HUMAN;SHBG_HUMAN	23	-25.5357	0.744643	Zika	QC	NaN	NaN	NaN
Zika / QC	P02042	P02042	1.86498	1.86498	2.99257e-07	8.56209e-07	138	P02042	HBD	Hemoglobin subunit delta	HBD_HUMAN	4	264.263	3.64263	Zika	QC	NaN	NaN	NaN
Zika / QC	Q01518;Q5T0R1;Q5T0R2;Q5T0R3;Q5T0R4;Q5T0R5;Q5T0R6;Q5T0R7	Q01518;Q5T0R1;Q5T0R2;Q5T0R3;Q5T0R4;Q5T0R5;Q5T0R6;Q5T0R7	0.869003	0.869003	2.98242e-07	8.56209e-07	54	Q01518;Q5T0R1;Q5T0R2;Q5T0R3;Q5T0R4;Q5T0R5;Q5T0R6;Q5T0R7	CAP1	Adenylyl cyclase-associated protein 1;Adenylyl cyclase-associated protein 1 (Fragment);Adenylyl cyclase-associated protein 1 (Fragment);Adenylyl cyclase-associated protein 1 (Fragment);Adenylyl cyclase-associated protein 1 (Fragment);Adenylyl cyclase-associated protein 1 (Fragment);Adenylyl cyclase-associated protein 1 (Fragment);Adenylyl cyclase-associated protein 1 (Fragment)	CAP1_HUMAN;Q5T0R1_HUMAN;Q5T0R2_HUMAN;Q5T0R3_HUMAN;Q5T0R4_HUMAN;Q5T0R5_HUMAN;Q5T0R6_HUMAN;Q5T0R7_HUMAN	2	82.64	1.8264	Zika	QC	NaN	NaN	NaN
Zika / QC	P01705	P01705	-0.999392	0.999392	3.119e-07	8.86226e-07	122	P01705	IGLV2-23	Immunoglobulin lambda variable 2-23	LV223_HUMAN	2	-49.9789	0.500211	Zika	QC	NaN	NaN	NaN
Zika / QC	P01597;P04432	P01597;P04432	-0.485604	0.485604	3.3829e-07	9.48131e-07	138	P01597;P04432	IGKV1-39;IGKV1D-39	Immunoglobulin kappa variable 1-39;Immunoglobulin kappa variable 1D-39	KV139_HUMAN;KVD39_HUMAN	3	-28.5802	0.714198	Zika	QC	NaN	NaN	NaN
Zika / QC	A0A075B6S6	A0A075B6S6	0.917232	0.917232	3.42035e-07	9.52151e-07	58	A0A075B6S6	IGKV2D-30	Immunoglobulin kappa variable 2D-30	KVD30_HUMAN	2	88.8488	1.88849	Zika	QC	NaN	NaN	NaN
Zika / QC	A0A075B6I0	A0A075B6I0	-0.358106	0.358106	4.14812e-07	1.12436e-06	146	A0A075B6I0	IGLV8-61	Immunoglobulin lambda variable 8-61	LV861_HUMAN	4	-21.9812	0.780188	Zika	QC	NaN	NaN	NaN
Zika / QC	P32119	P32119	1.56074	1.56074	4.61557e-07	1.21898e-06	142	P32119	PRDX2	Peroxiredoxin-2	PRDX2_HUMAN	13	195.004	2.95004	Zika	QC	NaN	NaN	NaN
Zika / QC	A0A0J9YVY3	A0A0J9YVY3	0.728827	0.728827	4.95771e-07	1.29277e-06	52	A0A0J9YVY3	IGHV7-4-1	Immunoglobulin heavy variable 7-4-1	HV741_HUMAN	2	65.7291	1.65729	Zika	QC	NaN	NaN	NaN
Zika / QC	A0A0C4DH24	A0A0C4DH24	-0.465705	0.465705	5.17341e-07	1.33215e-06	114	A0A0C4DH24	IGKV6-21	Immunoglobulin kappa variable 6-21	KV621_HUMAN	1	-27.5883	0.724117	Zika	QC	NaN	NaN	NaN
Zika / QC	P37802;P37802-2;X6RJP6	P37802;P37802-2;X6RJP6	0.616301	0.616301	5.28582e-07	1.35264e-06	78	P37802;P37802-2;X6RJP6	TAGLN2	Transgelin-2;Isoform 2 of Transgelin-2;Transgelin-2 (Fragment)	TAGL2_HUMAN;TAGL2_HUMAN;X6RJP6_HUMAN	8	53.294	1.53294	Zika	QC	NaN	NaN	NaN
Zika / QC	K7EKL3;P28799;P28799-2;P28799-3	K7EKL3;P28799;P28799-2;P28799-3	0.813229	0.813229	7.43632e-07	1.85683e-06	28	K7EKL3;P28799;P28799-2;P28799-3	GRN	Granulins (Fragment);Granulins;Isoform 2 of Granulins;Isoform 3 of Granulins	K7EKL3_HUMAN;GRN_HUMAN;GRN_HUMAN;GRN_HUMAN	2	75.714	1.75714	Zika	QC	NaN	NaN	NaN
Zika / QC	P18428	P18428	-0.505668	0.505668	7.97333e-07	1.95537e-06	148	P18428	LBP	Lipopolysaccharide-binding protein	LBP_HUMAN	18	-29.5666	0.704334	Zika	QC	NaN	NaN	NaN
Zika / QC	P00450	P00450	-0.689874	0.689874	1.00693e-06	2.398e-06	148	P00450	CP	Ceruloplasmin	CERU_HUMAN	95	-38.0092	0.619908	Zika	QC	NaN	NaN	NaN
Zika / QC	P55290;P55290-4	P55290;P55290-4	0.190449	0.190449	1.05492e-06	2.49786e-06	116	P55290;P55290-4	CDH13	Cadherin-13;Isoform 4 of Cadherin-13	CAD13_HUMAN	5	14.1118	1.14112	Zika	QC	NaN	NaN	NaN
Zika / QC	P62328	P62328	1.20028	1.20028	1.26211e-06	2.9213e-06	68	P62328	TMSB4X	Thymosin beta-4	TYB4_HUMAN	3	129.785	2.29785	Zika	QC	NaN	NaN	NaN
Zika / QC	J3KPA1;P54108;P54108-2;P54108-3	J3KPA1;P54108;P54108-2;P54108-3	0.659844	0.659844	1.43248e-06	3.2971e-06	100	J3KPA1;P54108;P54108-2;P54108-3	CRISP3	Cysteine-rich secretory protein 3;Cysteine-rich secretory protein 3;Isoform 2 of Cysteine-rich secretory protein 3;Isoform 3 of Cysteine-rich secretory protein 3	J3KPA1_HUMAN;CRIS3_HUMAN;CRIS3_HUMAN;CRIS3_HUMAN	7	57.9912	1.57991	Zika	QC	NaN	NaN	NaN
Zika / QC	A0A0U1RQQ4;Q9UNN8	A0A0U1RQQ4;Q9UNN8	0.81593	0.81593	1.4867e-06	3.3841e-06	76	A0A0U1RQQ4;Q9UNN8	PROCR	Endothelial protein C receptor (Fragment);Endothelial protein C receptor	A0A0U1RQQ4_HUMAN;EPCR_HUMAN	3	76.0433	1.76043	Zika	QC	NaN	NaN	NaN
Zika / QC	P61626	P61626	-0.467797	0.467797	1.6118e-06	3.62876e-06	148	P61626	LYZ	Lysozyme C	LYSC_HUMAN	11	-27.6932	0.723068	Zika	QC	NaN	NaN	NaN
Zika / QC	O75594	O75594	0.996899	0.996899	1.68691e-06	3.73598e-06	32	O75594	PGLYRP1	Peptidoglycan recognition protein 1	PGRP1_HUMAN	4	99.5706	1.99571	Zika	QC	NaN	NaN	NaN
Zika / QC	P06396	P06396	0.239908	0.239908	1.78329e-06	3.86482e-06	148	P06396	GSN	Gelsolin	GELS_HUMAN	65	18.0917	1.18092	Zika	QC	NaN	NaN	NaN
Zika / QC	A0A075B6S2;A2NJV5	A0A075B6S2;A2NJV5	-0.31604	0.31604	1.78008e-06	3.86482e-06	126	A0A075B6S2;A2NJV5	IGKV2D-29;IGKV2-29	Immunoglobulin kappa variable 2D-29;Immunoglobulin kappa variable 2-29	KVD29_HUMAN;KV229_HUMAN	3	-19.6728	0.803272	Zika	QC	NaN	NaN	NaN
Zika / QC	P03950	P03950	0.901189	0.901189	1.80323e-06	3.86944e-06	76	P03950	ANG	Angiogenin	ANGI_HUMAN	6	86.7604	1.8676	Zika	QC	NaN	NaN	NaN
Zika / QC	P48740-2	P48740-2	0.175168	0.175168	2.38948e-06	4.92232e-06	104	P48740-2	MASP1	Isoform 2 of Mannan-binding lectin serine protease 1	MASP1_HUMAN	9	12.9096	1.1291	Zika	QC	NaN	NaN	NaN
Zika / QC	P01593;P01594	P01593;P01594	-0.461627	0.461627	2.54272e-06	5.18614e-06	148	P01593;P01594	IGKV1D-33;IGKV1-33	Immunoglobulin kappa variable 1D-33;Immunoglobulin kappa variable 1-33	KVD33_HUMAN;KV133_HUMAN	4	-27.3833	0.726167	Zika	QC	NaN	NaN	NaN
Zika / QC	E9PHK0;P05452	E9PHK0;P05452	0.45315	0.45315	3.78954e-06	7.5062e-06	148	E9PHK0;P05452	CLEC3B	Tetranectin	E9PHK0_HUMAN;TETN_HUMAN	11	36.9026	1.36903	Zika	QC	NaN	NaN	NaN
Zika / QC	A0A0B4J1R6;P29401;P29401-2	A0A0B4J1R6;P29401;P29401-2	-0.614628	0.614628	3.82913e-06	7.54834e-06	76	A0A0B4J1R6;P29401;P29401-2	TKT	Transketolase;Transketolase;Isoform 2 of Transketolase	A0A0B4J1R6_HUMAN;TKT_HUMAN;TKT_HUMAN	9	-34.6902	0.653098	Zika	QC	NaN	NaN	NaN
Zika / QC	A0A140TA49	A0A140TA49	0.411666	0.411666	4.61445e-06	8.9677e-06	148	A0A140TA49	C4A	Complement C4-A	A0A140TA49_HUMAN	9	33.0221	1.33022	Zika	QC	NaN	NaN	NaN
Zika / QC	P01743	P01743	-0.529031	0.529031	4.79765e-06	9.23659e-06	148	P01743	IGHV1-46	Immunoglobulin heavy variable 1-46	HV146_HUMAN	1	-30.698	0.69302	Zika	QC	NaN	NaN	NaN
Zika / QC	O95497	O95497	0.763028	0.763028	6.31662e-06	1.17337e-05	54	O95497	VNN1	Pantetheinase	VNN1_HUMAN	5	69.7048	1.69705	Zika	QC	NaN	NaN	NaN
Zika / QC	P04406	P04406	0.809022	0.809022	7.84568e-06	1.39932e-05	72	P04406	GAPDH	Glyceraldehyde-3-phosphate dehydrogenase	G3P_HUMAN	11	75.2023	1.75202	Zika	QC	NaN	NaN	NaN
Zika / QC	P01034	P01034	-0.391124	0.391124	8.54244e-06	1.51051e-05	148	P01034	CST3	Cystatin-C	CYTC_HUMAN	9	-23.7465	0.762535	Zika	QC	NaN	NaN	NaN
Zika / QC	A0A075B6K2	A0A075B6K2	1.63228	1.63228	9.12525e-06	1.59983e-05	44	A0A075B6K2	IGLV3-12	Immunoglobulin lambda variable 3-12	LV312_HUMAN	2	210.003	3.10003	Zika	QC	NaN	NaN	NaN
Zika / QC	P01701	P01701	-0.480923	0.480923	1.02243e-05	1.75517e-05	148	P01701	IGLV1-51	Immunoglobulin lambda variable 1-51	LV151_HUMAN	6	-28.3481	0.716519	Zika	QC	NaN	NaN	NaN
Zika / QC	P35858;P35858-2	P35858;P35858-2	0.415118	0.415118	1.15178e-05	1.96089e-05	148	P35858;P35858-2	IGFALS	Insulin-like growth factor-binding protein complex acid labile subunit;Isoform 2 of Insulin-like growth factor-binding protein complex acid labile subunit	ALS_HUMAN	28	33.3407	1.33341	Zika	QC	NaN	NaN	NaN
Zika / QC	P27169	P27169	0.294973	0.294973	1.28508e-05	2.14354e-05	148	P27169	PON1	Serum paraoxonase/arylesterase 1	PON1_HUMAN	20	22.6862	1.22686	Zika	QC	NaN	NaN	NaN
Zika / QC	P02763	P02763	-0.318096	0.318096	1.33632e-05	2.20226e-05	148	P02763	ORM1	Alpha-1-acid glycoprotein 1	A1AG1_HUMAN	14	-19.7872	0.802128	Zika	QC	NaN	NaN	NaN
Zika / QC	A0A075B6S9	A0A075B6S9	0.0639703	0.0639703	1.35214e-05	2.21945e-05	144	A0A075B6S9	IGKV1D-37	Immunoglobulin kappa variable 1-37 (non-functional) (Fragment)	A0A075B6S9_HUMAN	1	4.53386	1.04534	Zika	QC	NaN	NaN	NaN
Zika / QC	P08571	P08571	-0.383116	0.383116	2.04884e-05	3.2718e-05	148	P08571	CD14	Monocyte differentiation antigen CD14	CD14_HUMAN	10	-23.3221	0.766779	Zika	QC	NaN	NaN	NaN
Zika / QC	P02749	P02749	0.165619	0.165619	2.05865e-05	3.27476e-05	148	P02749	APOH	Beta-2-glycoprotein 1	APOH_HUMAN	30	12.1647	1.12165	Zika	QC	NaN	NaN	NaN
Zika / QC	A0A0U1RR20;Q92954;Q92954-3;Q92954-6	A0A0U1RR20;Q92954;Q92954-3;Q92954-6	0.258524	0.258524	2.39456e-05	3.77992e-05	148	A0A0U1RR20;Q92954;Q92954-3;Q92954-6	PRG4	Proteoglycan 4;Proteoglycan 4;Isoform C of Proteoglycan 4;Isoform F of Proteoglycan 4	A0A0U1RR20_HUMAN;PRG4_HUMAN;PRG4_HUMAN;PRG4_HUMAN	18	19.6254	1.19625	Zika	QC	NaN	NaN	NaN
Zika / QC	Q04756	Q04756	0.260188	0.260188	2.52113e-05	3.96452e-05	148	Q04756	HGFAC	Hepatocyte growth factor activator	HGFA_HUMAN	25	19.7635	1.19764	Zika	QC	NaN	NaN	NaN
Zika / QC	P11021	P11021	-0.198136	0.198136	2.79162e-05	4.34017e-05	108	P11021	HSPA5	78 kDa glucose-regulated protein	GRP78_HUMAN	17	-12.8324	0.871676	Zika	QC	NaN	NaN	NaN
Zika / QC	A0A075B6R2	A0A075B6R2	-0.689761	0.689761	3.41024e-05	5.26225e-05	148	A0A075B6R2	IGHV4-4	Immunoglobulin heavy variable 4-4	HV404_HUMAN	8	-38.0043	0.619957	Zika	QC	NaN	NaN	NaN
Zika / QC	A0A286YES5;P01854	A0A286YES5;P01854	2.37153	2.37153	5.03556e-05	7.35909e-05	50	A0A286YES5;P01854	IGHE	Immunoglobulin heavy constant epsilon (Fragment);Immunoglobulin heavy constant epsilon	A0A286YES5_HUMAN;IGHE_HUMAN	9	417.491	5.17491	Zika	QC	NaN	NaN	NaN
Zika / QC	P20742	P20742	1.85214	1.85214	5.1747e-05	7.42211e-05	132	P20742	PZP	Pregnancy zone protein	PZP_HUMAN	49	261.035	3.61035	Zika	QC	NaN	NaN	NaN
Zika / QC	P23142	P23142	-0.251397	0.251397	5.18766e-05	7.42211e-05	148	P23142	FBLN1	Fibulin-1	FBLN1_HUMAN	30	-15.9917	0.840083	Zika	QC	NaN	NaN	NaN
Zika / QC	G3V0E5;P02786	G3V0E5;P02786	-0.609753	0.609753	5.18827e-05	7.42211e-05	144	G3V0E5;P02786	TFRC	Transferrin receptor (P90, CD71), isoform CRA_c;Transferrin receptor protein 1	G3V0E5_HUMAN;TFR1_HUMAN	12	-34.4691	0.655309	Zika	QC	NaN	NaN	NaN
Zika / QC	Q9NZP8	Q9NZP8	-0.238411	0.238411	5.26891e-05	7.51138e-05	148	Q9NZP8	C1RL	Complement C1r subcomponent-like protein	C1RL_HUMAN	13	-15.2322	0.847678	Zika	QC	NaN	NaN	NaN
Zika / QC	O95445	O95445	0.222672	0.222672	5.41101e-05	7.66096e-05	148	O95445	APOM	Apolipoprotein M	APOM_HUMAN	17	16.6893	1.16689	Zika	QC	NaN	NaN	NaN
Zika / QC	A0A0J9YY99	A0A0J9YY99	-0.286602	0.286602	5.40003e-05	7.66096e-05	148	A0A0J9YY99	NaN	Uncharacterized protein (Fragment)	A0A0J9YY99_HUMAN	7	-18.0169	0.819831	Zika	QC	NaN	NaN	NaN
Zika / QC	P02649	P02649	0.512499	0.512499	6.59062e-05	9.20453e-05	148	P02649	APOE	Apolipoprotein E	APOE_HUMAN	37	42.6519	1.42652	Zika	QC	NaN	NaN	NaN
Zika / QC	P06310	P06310	-0.268441	0.268441	7.19993e-05	9.95767e-05	148	P06310	IGKV2-30	Immunoglobulin kappa variable 2-30	KV230_HUMAN	6	-16.9784	0.830216	Zika	QC	NaN	NaN	NaN
Zika / QC	P05109	P05109	-0.598933	0.598933	7.26401e-05	0.000100093	142	P05109	S100A8	Protein S100-A8	S10A8_HUMAN	4	-33.9758	0.660242	Zika	QC	NaN	NaN	NaN
Zika / QC	P04114	P04114	0.232791	0.232791	0.00010912	0.000145024	148	P04114	APOB	Apolipoprotein B-100	APOB_HUMAN	367	17.5106	1.17511	Zika	QC	NaN	NaN	NaN
Zika / QC	P08519	P08519	0.582246	0.582246	0.000110659	0.000146036	148	P08519	LPA	Apolipoprotein(a)	APOA_HUMAN	47	49.7178	1.49718	Zika	QC	NaN	NaN	NaN
Zika / QC	Q06033;Q06033-2	Q06033;Q06033-2	-0.171545	0.171545	0.000110945	0.000146036	148	Q06033;Q06033-2	ITIH3	Inter-alpha-trypsin inhibitor heavy chain H3;Isoform 2 of Inter-alpha-trypsin inhibitor heavy chain H3	ITIH3_HUMAN	44	-11.2108	0.887892	Zika	QC	NaN	NaN	NaN
Zika / QC	Q9UEU0;Q9UEU0-2	Q9UEU0;Q9UEU0-2	-0.397157	0.397157	0.000115793	0.00015145	112	Q9UEU0;Q9UEU0-2	VTI1B	Vesicle transport through interaction with t-SNAREs homolog 1B;Isoform Short of Vesicle transport through interaction with t-SNAREs homolog 1B	VTI1B_HUMAN	1	-24.0647	0.759353	Zika	QC	NaN	NaN	NaN
Zika / QC	A0A0C4DH68	A0A0C4DH68	0.302732	0.302732	0.000128131	0.000164968	148	A0A0C4DH68	IGKV2-24	Immunoglobulin kappa variable 2-24	KV224_HUMAN	8	23.3478	1.23348	Zika	QC	NaN	NaN	NaN
Zika / QC	A0A075B6I7	A0A075B6I7	1.63455	1.63455	0.000133763	0.00017062	24	A0A075B6I7	IGLV5-48	Immunoglobulin lambda variable 5-48 (non-functional)	A0A075B6I7_HUMAN	1	210.491	3.10491	Zika	QC	NaN	NaN	NaN
Zika / QC	P01762	P01762	-0.367694	0.367694	0.00013675	0.000173357	134	P01762	IGHV3-11	Immunoglobulin heavy variable 3-11	HV311_HUMAN	3	-22.498	0.77502	Zika	QC	NaN	NaN	NaN
Zika / QC	P02652;V9GYM3	P02652;V9GYM3	0.338852	0.338852	0.000137902	0.000174281	148	P02652;V9GYM3	APOA2	Apolipoprotein A-II	APOA2_HUMAN;V9GYM3_HUMAN	12	26.475	1.26475	Zika	QC	NaN	NaN	NaN
Zika / QC	A0A075B6J1	A0A075B6J1	0.763874	0.763874	0.000142557	0.000179066	64	A0A075B6J1	IGLV5-37	Immunoglobulin lambda variable 5-37	LV537_HUMAN	2	69.8045	1.69804	Zika	QC	NaN	NaN	NaN
Zika / QC	P13796	P13796	-0.208762	0.208762	0.000152209	0.000188885	144	P13796	LCP1	Plastin-2	PLSL_HUMAN	19	-13.4721	0.865279	Zika	QC	NaN	NaN	NaN
Zika / QC	P07737	P07737	0.602804	0.602804	0.000152755	0.000188994	106	P07737	PFN1	Profilin-1	PROF1_HUMAN	10	51.8665	1.51867	Zika	QC	NaN	NaN	NaN
Zika / QC	G3XAP6;P49747	G3XAP6;P49747	0.279254	0.279254	0.000162644	0.000200028	118	G3XAP6;P49747	COMP	Cartilage oligomeric matrix protein	G3XAP6_HUMAN;COMP_HUMAN	16	21.3567	1.21357	Zika	QC	NaN	NaN	NaN
Zika / QC	P00747	P00747	0.226286	0.226286	0.000171263	0.000209378	148	P00747	PLG	Plasminogen	PLMN_HUMAN	90	16.982	1.16982	Zika	QC	NaN	NaN	NaN
Zika / QC	A0A0C4DH35	A0A0C4DH35	-0.707793	0.707793	0.000191601	0.000232176	148	A0A0C4DH35	IGHV3-35	Immunoglobulin heavy variable 3-35 (non-functional) (Fragment)	A0A0C4DH35_HUMAN	3	-38.7744	0.612256	Zika	QC	NaN	NaN	NaN
Zika / QC	A0A0C4DH25	A0A0C4DH25	-0.508349	0.508349	0.00019293	0.0002331	148	A0A0C4DH25	IGKV3D-20	Immunoglobulin kappa variable 3D-20	KVD20_HUMAN	2	-29.6973	0.703027	Zika	QC	NaN	NaN	NaN
Zika / QC	P43652	P43652	0.216978	0.216978	0.000231357	0.000275282	148	P43652	AFM	Afamin	AFAM_HUMAN	59	16.2296	1.1623	Zika	QC	NaN	NaN	NaN
Zika / QC	P01876	P01876	-0.366908	0.366908	0.000233985	0.000277017	146	P01876	IGHA1	Immunoglobulin heavy constant alpha 1	IGHA1_HUMAN	11	-22.4557	0.775443	Zika	QC	NaN	NaN	NaN
Zika / QC	A0A087WWU8;P06753-2	A0A087WWU8;P06753-2	0.800326	0.800326	0.000251647	0.000296224	82	A0A087WWU8;P06753-2	TPM3	Tropomyosin alpha-3 chain;Isoform 2 of Tropomyosin alpha-3 chain	A0A087WWU8_HUMAN;TPM3_HUMAN	17	74.1495	1.74149	Zika	QC	NaN	NaN	NaN
Zika / QC	H3BMH2;H3BSC1;P62491;P62491-2;Q15907;Q15907-2	H3BMH2;H3BSC1;P62491;P62491-2;Q15907;Q15907-2	1.02083	1.02083	0.000251017	0.000296224	36	H3BMH2;H3BSC1;P62491;P62491-2;Q15907;Q15907-2	RAB11A;RAB11A;RAB11A;RAB11A;RAB11B;RAB11B	Ras-related protein Rab-11A (Fragment);Ras-related protein Rab-11A;Ras-related protein Rab-11A;Isoform 2 of Ras-related protein Rab-11A;Ras-related protein Rab-11B;Isoform 2 of Ras-related protein Rab-11B	H3BMH2_HUMAN;H3BSC1_HUMAN;RB11A_HUMAN;RB11A_HUMAN;RB11B_HUMAN;RB11B_HUMAN	3	102.909	2.02909	Zika	QC	NaN	NaN	NaN
Zika / QC	Q15166	Q15166	0.296606	0.296606	0.000254571	0.000298514	76	Q15166	PON3	Serum paraoxonase/lactonase 3	PON3_HUMAN	8	22.8252	1.22825	Zika	QC	NaN	NaN	NaN
Zika / QC	P18206;P18206-2	P18206;P18206-2	-0.701147	0.701147	0.000336402	0.000380762	80	P18206;P18206-2	VCL	Vinculin;Isoform 1 of Vinculin	VINC_HUMAN	15	-38.4917	0.615083	Zika	QC	NaN	NaN	NaN
Zika / QC	F5GYZ5;F5H3C5;F5H4R2;P04179;P04179-3;P04179-4	F5GYZ5;F5H3C5;F5H4R2;P04179;P04179-3;P04179-4	-0.594452	0.594452	0.000349718	0.00039475	14	F5GYZ5;F5H3C5;F5H4R2;P04179;P04179-3;P04179-4	SOD2	Superoxide dismutase (Fragment);Superoxide dismutase (Fragment);Superoxide dismutase (Fragment);Superoxide dismutase [Mn], mitochondrial;Isoform 3 of Superoxide dismutase [Mn], mitochondrial;Isoform 4 of Superoxide dismutase [Mn], mitochondrial	F5GYZ5_HUMAN;F5H3C5_HUMAN;F5H4R2_HUMAN;SODM_HUMAN;SODM_HUMAN;SODM_HUMAN	1	-33.7704	0.662296	Zika	QC	NaN	NaN	NaN
Zika / QC	F5H8B0;P08709;P08709-2	F5H8B0;P08709;P08709-2	0.178964	0.178964	0.00038522	0.000431279	114	F5H8B0;P08709;P08709-2	F7	Coagulation factor VII;Coagulation factor VII;Isoform B of Coagulation factor VII	F5H8B0_HUMAN;FA7_HUMAN;FA7_HUMAN	4	13.2071	1.13207	Zika	QC	NaN	NaN	NaN
Zika / QC	P0DJI9	P0DJI9	-0.409983	0.409983	0.000426971	0.000467851	112	P0DJI9	SAA2	Serum amyloid A-2 protein	SAA2_HUMAN	8	-24.7368	0.752632	Zika	QC	NaN	NaN	NaN
Zika / QC	A0A0A0MRJ7;P12259	A0A0A0MRJ7;P12259	0.239401	0.239401	0.000431623	0.000471694	148	A0A0A0MRJ7;P12259	F5	Coagulation factor V	A0A0A0MRJ7_HUMAN;FA5_HUMAN	56	18.0502	1.1805	Zika	QC	NaN	NaN	NaN
Zika / QC	A0A075B6K6	A0A075B6K6	1.44214	1.44214	0.000480558	0.000521026	24	A0A075B6K6	IGLV4-3	Immunoglobulin lambda variable 4-3	LV403_HUMAN	3	171.723	2.71723	Zika	QC	NaN	NaN	NaN
Zika / QC	P01871	P01871	-0.694604	0.694604	0.000491314	0.000529899	148	P01871	IGHM	Immunoglobulin heavy constant mu	IGHM_HUMAN	47	-38.2121	0.617879	Zika	QC	NaN	NaN	NaN
Zika / QC	Q15582	Q15582	-0.337553	0.337553	0.000496796	0.000534412	142	Q15582	TGFBI	Transforming growth factor-beta-induced protein ig-h3	BGH3_HUMAN	27	-20.8618	0.791382	Zika	QC	NaN	NaN	NaN
Zika / QC	P10809	P10809	-1.4088	1.4088	0.00052552	0.000562375	42	P10809	HSPD1	60 kDa heat shock protein, mitochondrial	CH60_HUMAN	4	-62.3376	0.376624	Zika	QC	NaN	NaN	NaN
Zika / QC	P01706	P01706	0.324909	0.324909	0.000576097	0.000608595	148	P01706	IGLV2-11	Immunoglobulin lambda variable 2-11	LV211_HUMAN	6	25.2586	1.25259	Zika	QC	NaN	NaN	NaN
Zika / QC	Q96KN2	Q96KN2	0.387815	0.387815	0.000579935	0.000611083	144	Q96KN2	CNDP1	Beta-Ala-His dipeptidase	CNDP1_HUMAN	18	30.841	1.30841	Zika	QC	NaN	NaN	NaN
Zika / QC	E7ER44;P02788	E7ER44;P02788	-0.326664	0.326664	0.00058458	0.000614406	136	E7ER44;P02788	LTF	Lactotransferrin	E7ER44_HUMAN;TRFL_HUMAN	47	-20.2622	0.797378	Zika	QC	NaN	NaN	NaN
Zika / QC	C9JEE0	C9JEE0	0.741024	0.741024	0.000600264	0.000626098	114	C9JEE0	IGLL1	Immunoglobulin lambda-like polypeptide 1 (Fragment)	C9JEE0_HUMAN	1	67.1362	1.67136	Zika	QC	NaN	NaN	NaN
Zika / QC	P08246	P08246	0.420172	0.420172	0.000640182	0.000666047	76	P08246	ELANE	Neutrophil elastase	ELNE_HUMAN	6	33.8088	1.33809	Zika	QC	NaN	NaN	NaN
Zika / QC	Q99969	Q99969	1.382	1.382	0.000670313	0.000693891	22	Q99969	RARRES2	Retinoic acid receptor responder protein 2	RARR2_HUMAN	4	160.63	2.6063	Zika	QC	NaN	NaN	NaN
Zika / QC	A0A0B4J2B5	A0A0B4J2B5	-0.359894	0.359894	0.000756421	0.000765714	148	A0A0B4J2B5	IGHV3OR16-9	Immunoglobulin heavy variable 3/OR16-9 (non-functional) (Fragment)	A0A0B4J2B5_HUMAN	1	-22.0778	0.779222	Zika	QC	NaN	NaN	NaN
Zika / QC	P10643	P10643	-0.210585	0.210585	0.000782438	0.000788177	148	P10643	C7	Complement component C7	CO7_HUMAN	53	-13.5813	0.864187	Zika	QC	NaN	NaN	NaN
Zika / QC	P04433	P04433	-0.241939	0.241939	0.000827442	0.000827442	148	P04433	IGKV3-11	Immunoglobulin kappa variable 3-11	KV311_HUMAN	5	-15.4392	0.845608	Zika	QC	NaN	NaN	NaN
Zika / QC	Q6ZRK6	Q6ZRK6	0.0414658	0.0414658	0.000859709	0.000855274	52	Q6ZRK6	CCDC73	Coiled-coil domain-containing protein 73	CCD73_HUMAN	1	2.91589	1.02916	Zika	QC	NaN	NaN	NaN
Zika / QC	Q9NPH3;Q9NPH3-2;Q9NPH3-5	Q9NPH3;Q9NPH3-2;Q9NPH3-5	0.207102	0.207102	0.00089937	0.000884635	100	Q9NPH3;Q9NPH3-2;Q9NPH3-5	IL1RAP	Interleukin-1 receptor accessory protein;Isoform 2 of Interleukin-1 receptor accessory protein;Isoform 4 of Interleukin-1 receptor accessory protein	IL1AP_HUMAN	6	15.4367	1.15437	Zika	QC	NaN	NaN	NaN
Zika / QC	A0A0C4DH33	A0A0C4DH33	-0.336286	0.336286	0.000899665	0.000884635	142	A0A0C4DH33	IGHV1-24	Immunoglobulin heavy variable 1-24	HV124_HUMAN	3	-20.7922	0.792078	Zika	QC	NaN	NaN	NaN
Zika / QC	Q9UGM5	Q9UGM5	-0.596901	0.596901	0.000904224	0.000887001	148	Q9UGM5	FETUB	Fetuin-B	FETUB_HUMAN	12	-33.8827	0.661173	Zika	QC	NaN	NaN	NaN
Zika / QC	P19823	P19823	0.20391	0.20391	0.000915198	0.000895633	148	P19823	ITIH2	Inter-alpha-trypsin inhibitor heavy chain H2	ITIH2_HUMAN	58	15.1816	1.15182	Zika	QC	NaN	NaN	NaN
Zika / QC	Q13790	Q13790	-0.457598	0.457598	0.00119377	0.00111023	126	Q13790	APOF	Apolipoprotein F	APOF_HUMAN	3	-27.1802	0.728198	Zika	QC	NaN	NaN	NaN
Zika / QC	P07225	P07225	0.167279	0.167279	0.00127913	0.00118421	148	P07225	PROS1	Vitamin K-dependent protein S	PROS_HUMAN	33	12.2938	1.12294	Zika	QC	NaN	NaN	NaN
Zika / QC	A0A087WZR4;H0Y4U3;M9MML6;O75015	A0A087WZR4;H0Y4U3;M9MML6;O75015	1.01757	1.01757	0.00128193	0.00118421	20	A0A087WZR4;H0Y4U3;M9MML6;O75015	FCGR3B	Low affinity immunoglobulin gamma Fc region receptor III-B;Low affinity immunoglobulin gamma Fc region receptor III-B (Fragment);Low affinity immunoglobulin gamma Fc region receptor III-B;Low affinity immunoglobulin gamma Fc region receptor III-B	A0A087WZR4_HUMAN;H0Y4U3_HUMAN;M9MML6_HUMAN;FCG3B_HUMAN	3	102.451	2.02451	Zika	QC	NaN	NaN	NaN
Zika / QC	P07358	P07358	-0.336425	0.336425	0.00136105	0.00125168	148	P07358	C8B	Complement component C8 beta chain	CO8B_HUMAN	44	-20.7999	0.792001	Zika	QC	NaN	NaN	NaN
Zika / QC	P01834	P01834	-0.445931	0.445931	0.00178255	0.00158126	148	P01834	IGKC	Immunoglobulin kappa constant	IGKC_HUMAN	21	-26.589	0.73411	Zika	QC	NaN	NaN	NaN
Zika / QC	A0A1W2PQB1;H0Y755;M9MML0;P08637	A0A1W2PQB1;H0Y755;M9MML0;P08637	-0.486412	0.486412	0.00188178	0.00166015	148	A0A1W2PQB1;H0Y755;M9MML0;P08637	FCGR3A	Fc of IgG low affinity IIIa receptor isoform 1;Low affinity immunoglobulin gamma Fc region receptor III-A (Fragment);Low affinity immunoglobulin gamma Fc region receptor III-A;Low affinity immunoglobulin gamma Fc region receptor III-A	A0A1W2PQB1_HUMAN;H0Y755_HUMAN;M9MML0_HUMAN;FCG3A_HUMAN	7	-28.6202	0.713798	Zika	QC	NaN	NaN	NaN
Zika / QC	A0A0B4J1Y9	A0A0B4J1Y9	0.80949	0.80949	0.0019026	0.00167494	148	A0A0B4J1Y9	IGHV3-72	Immunoglobulin heavy variable 3-72	HV372_HUMAN	11	75.2592	1.75259	Zika	QC	NaN	NaN	NaN
Zika / QC	A0A075B6I9	A0A075B6I9	-0.311172	0.311172	0.00194429	0.00170799	130	A0A075B6I9	IGLV7-46	Immunoglobulin lambda variable 7-46	LV746_HUMAN	2	-19.4013	0.805987	Zika	QC	NaN	NaN	NaN
Zika / QC	H0Y300	H0Y300	1.39757	1.39757	0.00205217	0.0017913	30	H0Y300	HP	Haptoglobin	H0Y300_HUMAN	2	163.457	2.63457	Zika	QC	NaN	NaN	NaN
Zika / QC	P08294	P08294	0.51018	0.51018	0.00210046	0.00182571	84	P08294	SOD3	Extracellular superoxide dismutase [Cu-Zn]	SODE_HUMAN	5	42.4228	1.42423	Zika	QC	NaN	NaN	NaN
Zika / QC	P01782	P01782	-0.356352	0.356352	0.00210903	0.00182931	148	P01782	IGHV3-9	Immunoglobulin heavy variable 3-9	HV309_HUMAN	9	-21.8863	0.781137	Zika	QC	NaN	NaN	NaN
Zika / QC	P01717	P01717	-0.398467	0.398467	0.00227096	0.0019574	144	P01717	IGLV3-25	Immunoglobulin lambda variable 3-25	LV325_HUMAN	2	-24.1336	0.758664	Zika	QC	NaN	NaN	NaN
Zika / QC	A0A0G2JS06	A0A0G2JS06	-0.306476	0.306476	0.00237537	0.00203886	146	A0A0G2JS06	IGLV5-39	Immunoglobulin lambda variable 5-39	LV539_HUMAN	5	-19.1385	0.808615	Zika	QC	NaN	NaN	NaN
Zika / QC	P26038	P26038	-0.625244	0.625244	0.00254166	0.00214144	54	P26038	MSN	Moesin	MOES_HUMAN	13	-35.169	0.64831	Zika	QC	NaN	NaN	NaN
Zika / QC	A0A0C4DFP6;Q9NQ79;Q9NQ79-2	A0A0C4DFP6;Q9NQ79;Q9NQ79-2	0.335071	0.335071	0.00257324	0.00215922	148	A0A0C4DFP6;Q9NQ79;Q9NQ79-2	CRTAC1	Cartilage acidic protein 1;Cartilage acidic protein 1;Isoform 2 of Cartilage acidic protein 1	A0A0C4DFP6_HUMAN;CRAC1_HUMAN;CRAC1_HUMAN	15	26.1439	1.26144	Zika	QC	NaN	NaN	NaN
Zika / QC	Q9UNW1	Q9UNW1	0.658539	0.658539	0.00263785	0.00219554	54	Q9UNW1	MINPP1	Multiple inositol polyphosphate phosphatase 1	MINP1_HUMAN	5	57.8483	1.57848	Zika	QC	NaN	NaN	NaN
Zika / QC	P06312	P06312	0.354322	0.354322	0.00279201	0.00231451	148	P06312	IGKV4-1	Immunoglobulin kappa variable 4-1	KV401_HUMAN	7	27.8385	1.27838	Zika	QC	NaN	NaN	NaN
Zika / QC	P12955	P12955	0.108814	0.108814	0.00289896	0.00237922	76	P12955	PEPD	Xaa-Pro dipeptidase	PEPD_HUMAN	10	7.83415	1.07834	Zika	QC	NaN	NaN	NaN
Zika / QC	K7ERG9;P00746	K7ERG9;P00746	-0.11423	0.11423	0.00321092	0.00261442	148	K7ERG9;P00746	CFD	Complement factor D	K7ERG9_HUMAN;CFAD_HUMAN	10	-7.61246	0.923875	Zika	QC	NaN	NaN	NaN
Zika / QC	E7EX60;E9PEP6;O14786;O14786-2;O14786-3;Q5JWQ6;Q5T7F0	E7EX60;E9PEP6;O14786;O14786-2;O14786-3;Q5JWQ6;Q5T7F0	0.498969	0.498969	0.00334648	0.00271407	54	E7EX60;E9PEP6;O14786;O14786-2;O14786-3;Q5JWQ6;Q5T7F0	NRP1	Neuropilin-1;Neuropilin;Neuropilin-1;Isoform 2 of Neuropilin-1;Isoform 3 of Neuropilin-1;Neuropilin;Neuropilin	E7EX60_HUMAN;E9PEP6_HUMAN;NRP1_HUMAN;NRP1_HUMAN;NRP1_HUMAN;Q5JWQ6_HUMAN;Q5T7F0_HUMAN	3	41.3203	1.4132	Zika	QC	NaN	NaN	NaN
Zika / QC	A0A096LPE2	A0A096LPE2	0.228313	0.228313	0.00346424	0.00278586	148	A0A096LPE2	SAA2-SAA4	SAA2-SAA4 readthrough	A0A096LPE2_HUMAN	10	17.1465	1.17146	Zika	QC	NaN	NaN	NaN
Zika / QC	P48740	P48740	0.376647	0.376647	0.00355163	0.00284683	148	P48740	MASP1	Mannan-binding lectin serine protease 1	MASP1_HUMAN	24	29.8321	1.29832	Zika	QC	NaN	NaN	NaN
Zika / QC	P01624	P01624	-0.37315	0.37315	0.00379169	0.00299268	148	P01624	IGKV3-15	Immunoglobulin kappa variable 3-15	KV315_HUMAN	3	-22.7905	0.772095	Zika	QC	NaN	NaN	NaN
Zika / QC	P61769	P61769	-0.31207	0.31207	0.00472398	0.00363112	144	P61769	B2M	Beta-2-microglobulin	B2MG_HUMAN	6	-19.4515	0.805485	Zika	QC	NaN	NaN	NaN
Zika / QC	P00740	P00740	0.17168	0.17168	0.00499778	0.00380608	148	P00740	F9	Coagulation factor IX	FA9_HUMAN	18	12.6369	1.12637	Zika	QC	NaN	NaN	NaN
Zika / QC	P01344;P01344-3	P01344;P01344-3	0.170402	0.170402	0.00504762	0.00383142	148	P01344;P01344-3	IGF2	Insulin-like growth factor II;Isoform 3 of Insulin-like growth factor II	IGF2_HUMAN	5	12.5372	1.12537	Zika	QC	NaN	NaN	NaN
Zika / QC	P06733	P06733	-0.411705	0.411705	0.00523738	0.00394479	30	P06733	ENO1	Alpha-enolase	ENOA_HUMAN	15	-24.8266	0.751734	Zika	QC	NaN	NaN	NaN
Zika / QC	P02751;P02751-15;P02751-3;P02751-7	P02751;P02751-15;P02751-3;P02751-7	0.22375	0.22375	0.00556152	0.00416608	148	P02751;P02751-15;P02751-3;P02751-7	FN1	Fibronectin;Isoform 15 of Fibronectin;Isoform 3 of Fibronectin;Isoform 7 of Fibronectin	FINC_HUMAN	142	16.7765	1.16777	Zika	QC	NaN	NaN	NaN
Zika / QC	P25311	P25311	0.200621	0.200621	0.0056633	0.00422883	148	P25311	AZGP1	Zinc-alpha-2-glycoprotein	ZA2G_HUMAN	30	14.9193	1.14919	Zika	QC	NaN	NaN	NaN
Zika / QC	O75636	O75636	-0.195933	0.195933	0.00581052	0.00432118	148	O75636	FCN3	Ficolin-3	FCN3_HUMAN	13	-12.6992	0.873008	Zika	QC	NaN	NaN	NaN
Zika / QC	A0A0B4J1X5	A0A0B4J1X5	-0.173126	0.173126	0.00580406	0.00432118	148	A0A0B4J1X5	IGHV3-74	Immunoglobulin heavy variable 3-74	HV374_HUMAN	7	-11.3081	0.886919	Zika	QC	NaN	NaN	NaN
Zika / QC	A0A0C4DH67	A0A0C4DH67	-0.259425	0.259425	0.00584135	0.00433628	146	A0A0C4DH67	IGKV1-8	Immunoglobulin kappa variable 1-8	KV108_HUMAN	7	-16.4579	0.835421	Zika	QC	NaN	NaN	NaN
Zika / QC	P11597;P11597-2	P11597;P11597-2	0.709948	0.709948	0.0058842	0.00436024	94	P11597;P11597-2	CETP	Cholesteryl ester transfer protein;Isoform 2 of Cholesteryl ester transfer protein	CETP_HUMAN	4	63.5746	1.63575	Zika	QC	NaN	NaN	NaN
Zika / QC	P00739	P00739	0.541648	0.541648	0.00609417	0.00449158	148	P00739	HPR	Haptoglobin-related protein	HPTR_HUMAN	18	45.5634	1.45563	Zika	QC	NaN	NaN	NaN
Zika / QC	A0A0G2JMY9;Q8N6C8;Q8N6C8-3	A0A0G2JMY9;Q8N6C8;Q8N6C8-3	-0.849777	0.849777	0.00621751	0.00456615	68	A0A0G2JMY9;Q8N6C8;Q8N6C8-3	LILRA3	Leukocyte immunoglobulin-like receptor subfamily A member 3;Leukocyte immunoglobulin-like receptor subfamily A member 3;Isoform 3 of Leukocyte immunoglobulin-like receptor subfamily A member 3	A0A0G2JMY9_HUMAN;LIRA3_HUMAN;LIRA3_HUMAN	6	-44.513	0.55487	Zika	QC	NaN	NaN	NaN
Zika / QC	P02765	P02765	0.181454	0.181454	0.00624336	0.00457698	148	P02765	AHSG	Alpha-2-HS-glycoprotein	FETUA_HUMAN	23	13.4026	1.13403	Zika	QC	NaN	NaN	NaN
Zika / QC	P00738	P00738	-0.204936	0.204936	0.00625614	0.00457821	148	P00738	HP	Haptoglobin	HPT_HUMAN	56	-13.2423	0.867577	Zika	QC	NaN	NaN	NaN
Zika / QC	P00338;P00338-3	P00338;P00338-3	-0.612694	0.612694	0.00639996	0.00467515	118	P00338;P00338-3	LDHA	L-lactate dehydrogenase A chain;Isoform 3 of L-lactate dehydrogenase A chain	LDHA_HUMAN	9	-34.6026	0.653974	Zika	QC	NaN	NaN	NaN
Zika / QC	P02760	P02760	-0.276361	0.276361	0.00753792	0.0053917	148	P02760	AMBP	Protein AMBP	AMBP_HUMAN	31	-17.4329	0.825671	Zika	QC	NaN	NaN	NaN
Zika / QC	P07360	P07360	-0.126464	0.126464	0.00777794	0.00554413	148	P07360	C8G	Complement component C8 gamma chain	CO8G_HUMAN	13	-8.39258	0.916074	Zika	QC	NaN	NaN	NaN
Zika / QC	C9JB55	C9JB55	0.239565	0.239565	0.00788726	0.0055895	140	C9JB55	TF	Serotransferrin (Fragment)	C9JB55_HUMAN	2	18.0637	1.18064	Zika	QC	NaN	NaN	NaN
Zika / QC	P00742	P00742	0.125057	0.125057	0.00808979	0.00567801	148	P00742	F10	Coagulation factor X	FA10_HUMAN	21	9.05505	1.09055	Zika	QC	NaN	NaN	NaN
Zika / QC	O14791;O14791-2	O14791;O14791-2	0.149365	0.149365	0.00829672	0.00579364	148	O14791;O14791-2	APOL1	Apolipoprotein L1;Isoform 2 of Apolipoprotein L1	APOL1_HUMAN	26	10.9081	1.10908	Zika	QC	NaN	NaN	NaN
Zika / QC	A0A0B4J1Y8	A0A0B4J1Y8	0.152048	0.152048	0.00876153	0.00608727	132	A0A0B4J1Y8	IGLV9-49	Immunoglobulin lambda variable 9-49	LV949_HUMAN	7	11.1146	1.11115	Zika	QC	NaN	NaN	NaN
Zika / QC	P08253;P08253-2;P08253-3	P08253;P08253-2;P08253-3	0.250534	0.250534	0.00890159	0.00615345	58	P08253;P08253-2;P08253-3	MMP2	72 kDa type IV collagenase;Isoform 2 of 72 kDa type IV collagenase;Isoform 3 of 72 kDa type IV collagenase	MMP2_HUMAN	8	18.9648	1.18965	Zika	QC	NaN	NaN	NaN
Zika / QC	A0A087WTK0;A0A087WVC6;Q12913	A0A087WTK0;A0A087WVC6;Q12913	-1.06314	1.06314	0.009143	0.00627819	120	A0A087WTK0;A0A087WVC6;Q12913	PTPRJ	Receptor-type tyrosine-protein phosphatase eta	A0A087WTK0_HUMAN;A0A087WVC6_HUMAN;PTPRJ_HUMAN	7	-52.1412	0.478588	Zika	QC	NaN	NaN	NaN
Zika / QC	P13727	P13727	2.96126	2.96126	0.00964939	0.00657115	34	P13727	PRG2	Bone marrow proteoglycan	PRG2_HUMAN	5	678.806	7.78806	Zika	QC	NaN	NaN	NaN
Zika / QC	A0A075B6P5;P01615	A0A075B6P5;P01615	-0.310075	0.310075	0.0102058	0.00691575	148	A0A075B6P5;P01615	IGKV2-28;IGKV2D-28	Immunoglobulin kappa variable 2-28;Immunoglobulin kappa variable 2D-28	KV228_HUMAN;KVD28_HUMAN	1	-19.34	0.8066	Zika	QC	NaN	NaN	NaN
Zika / QC	E9PK25;G3V1A4;P23528	E9PK25;G3V1A4;P23528	0.553561	0.553561	0.0106851	0.00718152	64	E9PK25;G3V1A4;P23528	CFL1	Cofilin-1;Cofilin 1 (Non-muscle), isoform CRA_a;Cofilin-1	E9PK25_HUMAN;G3V1A4_HUMAN;COF1_HUMAN	9	46.7704	1.4677	Zika	QC	NaN	NaN	NaN
Zika / QC	Q15113	Q15113	0.708673	0.708673	0.0110091	0.00733943	64	Q15113	PCOLCE	Procollagen C-endopeptidase enhancer 1	PCOC1_HUMAN	9	63.4301	1.6343	Zika	QC	NaN	NaN	NaN
Zika / QC	E9PKE3;P11142	E9PKE3;P11142	0.380117	0.380117	0.0111125	0.00738468	74	E9PKE3;P11142	HSPA8	Heat shock cognate 71 kDa protein	E9PKE3_HUMAN;HSP7C_HUMAN	13	30.1447	1.30145	Zika	QC	NaN	NaN	NaN
Zika / QC	P0DOY2	P0DOY2	-0.170679	0.170679	0.01144	0.00754125	148	P0DOY2	IGLC2	Immunoglobulin lambda constant 2	IGLC2_HUMAN	20	-11.1575	0.888425	Zika	QC	NaN	NaN	NaN
Zika / QC	P04217	P04217	-0.123829	0.123829	0.0114291	0.00754125	148	P04217	A1BG	Alpha-1B-glycoprotein	A1BG_HUMAN	34	-8.22513	0.917749	Zika	QC	NaN	NaN	NaN
Zika / QC	O00391	O00391	-0.396966	0.396966	0.0122173	0.00801519	146	O00391	QSOX1	Sulfhydryl oxidase 1	QSOX1_HUMAN	24	-24.0546	0.759454	Zika	QC	NaN	NaN	NaN
Zika / QC	K7EL47;K7EQZ5;Q16853;Q16853-3	K7EL47;K7EQZ5;Q16853;Q16853-3	0.375441	0.375441	0.0128671	0.00838804	56	K7EL47;K7EQZ5;Q16853;Q16853-3	AOC3	Amine oxidase (Fragment);Amine oxidase (Fragment);Membrane primary amine oxidase;Isoform 3 of Membrane primary amine oxidase	K7EL47_HUMAN;K7EQZ5_HUMAN;AOC3_HUMAN;AOC3_HUMAN	1	29.7236	1.29724	Zika	QC	NaN	NaN	NaN
Zika / QC	A0A0J9YX35	A0A0J9YX35	0.225291	0.225291	0.0131052	0.00852979	148	A0A0J9YX35	IGHV3-64D	Immunoglobulin heavy variable 3-64D	HV64D_HUMAN	3	16.9013	1.16901	Zika	QC	NaN	NaN	NaN
Zika / QC	P67936	P67936	0.870194	0.870194	0.0133491	0.00867484	58	P67936	TPM4	Tropomyosin alpha-4 chain	TPM4_HUMAN	11	82.7909	1.82791	Zika	QC	NaN	NaN	NaN
Zika / QC	A0A0C4DH34	A0A0C4DH34	-0.0478729	0.0478729	0.0134023	0.008682	148	A0A0C4DH34	IGHV4-28	Immunoglobulin heavy variable 4-28	HV428_HUMAN	5	-3.26384	0.967362	Zika	QC	NaN	NaN	NaN
Zika / QC	A0A075B6K5	A0A075B6K5	-0.299867	0.299867	0.0141112	0.00911796	148	A0A075B6K5	IGLV3-9	Immunoglobulin lambda variable 3-9	LV39_HUMAN	5	-18.7673	0.812327	Zika	QC	NaN	NaN	NaN
Zika / QC	A0A0G2JMI3	A0A0G2JMI3	0.0650154	0.0650154	0.0141196	0.00911796	124	A0A0G2JMI3	IGHV1-69-2	Immunoglobulin heavy variable 1-69-2	HV692_HUMAN	4	4.60961	1.0461	Zika	QC	NaN	NaN	NaN
Zika / QC	P04003	P04003	-0.121164	0.121164	0.0148462	0.00955724	148	P04003	C4BPA	C4b-binding protein alpha chain	C4BPA_HUMAN	49	-8.05544	0.919446	Zika	QC	NaN	NaN	NaN
Zika / QC	P68032;P68133	P68032;P68133	0.385216	0.385216	0.0148883	0.00956938	74	P68032;P68133	ACTC1;ACTA1	Actin, alpha cardiac muscle 1;Actin, alpha skeletal muscle	ACTC_HUMAN;ACTS_HUMAN	3	30.6055	1.30606	Zika	QC	NaN	NaN	NaN
Zika / QC	P05543	P05543	-0.430399	0.430399	0.0153404	0.00979882	148	P05543	SERPINA7	Thyroxine-binding globulin	THBG_HUMAN	20	-25.7943	0.742057	Zika	QC	NaN	NaN	NaN
Zika / QC	P09172	P09172	-0.0173807	0.0173807	0.0168331	0.0105559	84	P09172	DBH	Dopamine beta-hydroxylase	DOPO_HUMAN	10	-1.19751	0.988025	Zika	QC	NaN	NaN	NaN
Zika / QC	A0A0C4DH43	A0A0C4DH43	-0.249335	0.249335	0.0175555	0.0109452	146	A0A0C4DH43	IGHV2-70D	Immunoglobulin heavy variable 2-70D	HV70D_HUMAN	10	-15.8716	0.841284	Zika	QC	NaN	NaN	NaN
Zika / QC	P18065	P18065	0.314231	0.314231	0.0175602	0.0109452	56	P18065	IGFBP2	Insulin-like growth factor-binding protein 2	IBP2_HUMAN	12	24.3349	1.24335	Zika	QC	NaN	NaN	NaN
Zika / QC	A0A075B6J9	A0A075B6J9	-0.193771	0.193771	0.0176719	0.0109982	148	A0A075B6J9	IGLV2-18	Immunoglobulin lambda variable 2-18	LV218_HUMAN	3	-12.5682	0.874318	Zika	QC	NaN	NaN	NaN
Zika / QC	P15144	P15144	1.03011	1.03011	0.0189111	0.0116988	44	P15144	ANPEP	Aminopeptidase N	AMPN_HUMAN	10	104.217	2.04217	Zika	QC	NaN	NaN	NaN
Zika / QC	Q92905	Q92905	0.447996	0.447996	0.0190848	0.0117357	116	Q92905	COPS5	COP9 signalosome complex subunit 5	CSN5_HUMAN	1	36.4144	1.36414	Zika	QC	NaN	NaN	NaN
Zika / QC	A0A075B7D8	A0A075B7D8	-1.7092	1.7092	0.0201377	0.0122915	148	A0A075B7D8	IGHV3OR15-7	Immunoglobulin heavy variable 3/OR15-7 (pseudogene) (Fragment)	A0A075B7D8_HUMAN	3	-69.4171	0.305829	Zika	QC	NaN	NaN	NaN
Zika / QC	A0A075B7D0	A0A075B7D0	0.363342	0.363342	0.0204271	0.0124496	148	A0A075B7D0	IGHV1OR15-1	Immunoglobulin heavy variable 1/OR15-1 (non-functional) (Fragment)	A0A075B7D0_HUMAN	3	28.6403	1.2864	Zika	QC	NaN	NaN	NaN
Zika / QC	P36980;P36980-2	P36980;P36980-2	-0.12312	0.12312	0.0205724	0.0125197	148	P36980;P36980-2	CFHR2	Complement factor H-related protein 2;Isoform Short of Complement factor H-related protein 2	FHR2_HUMAN	5	-8.18004	0.9182	Zika	QC	NaN	NaN	NaN
Zika / QC	P04430	P04430	-0.210899	0.210899	0.0211358	0.0128058	148	P04430	IGKV1-16	Immunoglobulin kappa variable 1-16	KV116_HUMAN	3	-13.6001	0.863999	Zika	QC	NaN	NaN	NaN
Zika / QC	P05155;P05155-3	P05155;P05155-3	-0.196872	0.196872	0.0213455	0.0128949	148	P05155;P05155-3	SERPING1	Plasma protease C1 inhibitor;Isoform 3 of Plasma protease C1 inhibitor	IC1_HUMAN	37	-12.756	0.87244	Zika	QC	NaN	NaN	NaN
Zika / QC	G3V2W1;Q9UK55	G3V2W1;Q9UK55	-0.557417	0.557417	0.0219972	0.0132498	148	G3V2W1;Q9UK55	SERPINA10	Protein Z-dependent protease inhibitor	G3V2W1_HUMAN;ZPI_HUMAN	26	-32.0482	0.679518	Zika	QC	NaN	NaN	NaN
Zika / QC	P05160	P05160	0.1366	0.1366	0.0223976	0.013446	148	P05160	F13B	Coagulation factor XIII B chain	F13B_HUMAN	47	9.93111	1.09931	Zika	QC	NaN	NaN	NaN
Zika / QC	A0A0J9YVT0;P0DP02	A0A0J9YVT0;P0DP02	-0.151575	0.151575	0.0230529	0.0137053	148	A0A0J9YVT0;P0DP02	IGHV3-33;IGHV3-30-3	Immunoglobulin heavy variable 3-33 (Fragment);Immunoglobulin heavy variable 3-30-3	A0A0J9YVT0_HUMAN;HVC33_HUMAN	12	-9.97331	0.900267	Zika	QC	NaN	NaN	NaN
Zika / QC	A0A0A0MS15	A0A0A0MS15	-0.320366	0.320366	0.0233429	0.0138578	148	A0A0A0MS15	IGHV3-49	Immunoglobulin heavy variable 3-49	HV349_HUMAN	9	-19.9133	0.800867	Zika	QC	NaN	NaN	NaN
Zika / QC	P0DOY3	P0DOY3	-0.440883	0.440883	0.0236436	0.0140161	108	P0DOY3	IGLC3	Immunoglobulin lambda constant 3	IGLC3_HUMAN	3	-26.3317	0.736683	Zika	QC	NaN	NaN	NaN
Zika / QC	Q9Y490	Q9Y490	0.604559	0.604559	0.0237233	0.0140431	36	Q9Y490	TLN1	Talin-1	TLN1_HUMAN	35	52.0514	1.52051	Zika	QC	NaN	NaN	NaN
Zika / QC	P33908	P33908	0.000275488	0.000275488	0.0240998	0.0142251	84	P33908	MAN1A1	Mannosyl-oligosaccharide 1,2-alpha-mannosidase IA	MA1A1_HUMAN	8	0.0190972	1.00019	Zika	QC	NaN	NaN	NaN
Zika / QC	A0A087WSX0	A0A087WSX0	-0.221687	0.221687	0.0242719	0.0143062	114	A0A087WSX0	IGLV5-45	Immunoglobulin lambda variable 5-45	LV545_HUMAN	1	-14.2438	0.857562	Zika	QC	NaN	NaN	NaN
Zika / QC	A0A087X0M8;O00533;O00533-2	A0A087X0M8;O00533;O00533-2	0.856943	0.856943	0.0250222	0.0147064	134	A0A087X0M8;O00533;O00533-2	CHL1	Neural cell adhesion molecule L1-like protein;Neural cell adhesion molecule L1-like protein;Isoform 2 of Neural cell adhesion molecule L1-like protein	A0A087X0M8_HUMAN;NCHL1_HUMAN;NCHL1_HUMAN	8	81.1197	1.8112	Zika	QC	NaN	NaN	NaN
Zika / QC	P02745	P02745	-0.129954	0.129954	0.0254426	0.0148897	148	P02745	C1QA	Complement C1q subcomponent subunit A	C1QA_HUMAN	9	-8.61395	0.913861	Zika	QC	NaN	NaN	NaN
Zika / QC	P10909;P10909-2;P10909-4;P10909-5	P10909;P10909-2;P10909-4;P10909-5	0.0804593	0.0804593	0.0260501	0.0151806	148	P10909;P10909-2;P10909-4;P10909-5	CLU	Clusterin;Isoform 2 of Clusterin;Isoform 4 of Clusterin;Isoform 5 of Clusterin	CLUS_HUMAN	38	5.73546	1.05735	Zika	QC	NaN	NaN	NaN
Zika / QC	A0A286YEY5;P01877	A0A286YEY5;P01877	1.42882	1.42882	0.0264799	0.0153875	144	A0A286YEY5;P01877	IGHA2	Immunoglobulin heavy constant alpha 2 (Fragment);Immunoglobulin heavy constant alpha 2	A0A286YEY5_HUMAN;IGHA2_HUMAN	5	169.227	2.69227	Zika	QC	NaN	NaN	NaN
Zika / QC	P35527	P35527	-1.98027	1.98027	0.0279889	0.0161731	12	P35527	KRT9	Keratin, type I cytoskeletal 9	K1C9_HUMAN	10	-74.6558	0.253442	Zika	QC	NaN	NaN	NaN
Zika / QC	A0A0B4J1V0	A0A0B4J1V0	-0.203319	0.203319	0.028109	0.0161971	148	A0A0B4J1V0	IGHV3-15	Immunoglobulin heavy variable 3-15	HV315_HUMAN	10	-13.145	0.86855	Zika	QC	NaN	NaN	NaN
Zika / QC	A0A0C4DH29	A0A0C4DH29	-0.220243	0.220243	0.0289739	0.0166257	140	A0A0C4DH29	IGHV1-3	Immunoglobulin heavy variable 1-3	HV103_HUMAN	3	-14.1579	0.858421	Zika	QC	NaN	NaN	NaN
Zika / QC	P04040	P04040	0.469644	0.469644	0.0299691	0.0171015	94	P04040	CAT	Catalase	CATA_HUMAN	15	38.4767	1.38477	Zika	QC	NaN	NaN	NaN
Zika / QC	A0A0G2JRQ6	A0A0G2JRQ6	0.180423	0.180423	0.0308815	0.0175251	148	A0A0G2JRQ6	NaN	Uncharacterized protein (Fragment)	A0A0G2JRQ6_HUMAN	5	13.3216	1.13322	Zika	QC	NaN	NaN	NaN
Zika / QC	P34096	P34096	0.655135	0.655135	0.0326233	0.0183618	16	P34096	RNASE4	Ribonuclease 4	RNAS4_HUMAN	5	57.4763	1.57476	Zika	QC	NaN	NaN	NaN
Zika / QC	P04004	P04004	-0.18495	0.18495	0.0327195	0.0183908	148	P04004	VTN	Vitronectin	VTNC_HUMAN	28	-12.032	0.87968	Zika	QC	NaN	NaN	NaN
Zika / QC	F8WF14;P06276	F8WF14;P06276	0.15029	0.15029	0.0327995	0.0184106	148	F8WF14;P06276	BCHE	Carboxylic ester hydrolase;Cholinesterase	F8WF14_HUMAN;CHLE_HUMAN	8	10.9793	1.10979	Zika	QC	NaN	NaN	NaN
Zika / QC	P04211	P04211	-0.0808268	0.0808268	0.0347536	0.0194017	148	P04211	IGLV7-43	Immunoglobulin lambda variable 7-43	LV743_HUMAN	5	-5.44844	0.945516	Zika	QC	NaN	NaN	NaN
Zika / QC	P01599	P01599	-0.214179	0.214179	0.0350076	0.0195171	146	P01599	IGKV1-17	Immunoglobulin kappa variable 1-17	KV117_HUMAN	2	-13.7963	0.862037	Zika	QC	NaN	NaN	NaN
Zika / QC	A0A0B4J1X8	A0A0B4J1X8	0.193775	0.193775	0.0352155	0.0196064	148	A0A0B4J1X8	IGHV3-43	Immunoglobulin heavy variable 3-43	HV343_HUMAN	3	14.3753	1.14375	Zika	QC	NaN	NaN	NaN
Zika / QC	O43866	O43866	0.0949403	0.0949403	0.0360604	0.0199958	148	O43866	CD5L	CD5 antigen-like	CD5L_HUMAN	21	6.80212	1.06802	Zika	QC	NaN	NaN	NaN
Zika / QC	P06681	P06681	0.311198	0.311198	0.0378439	0.0208724	148	P06681	C2	Complement C2	CO2_HUMAN	12	24.0738	1.24074	Zika	QC	NaN	NaN	NaN
Zika / QC	Q9Y5Y7	Q9Y5Y7	-0.638417	0.638417	0.0379193	0.020886	118	Q9Y5Y7	LYVE1	Lymphatic vessel endothelial hyaluronic acid receptor 1	LYVE1_HUMAN	6	-35.7582	0.642418	Zika	QC	NaN	NaN	NaN
Zika / QC	A0A087WSY5;Q96IY4	A0A087WSY5;Q96IY4	0.0894284	0.0894284	0.0391693	0.0214313	148	A0A087WSY5;Q96IY4	CPB2	Carboxypeptidase B2	A0A087WSY5_HUMAN;CBPB2_HUMAN	11	6.39485	1.06395	Zika	QC	NaN	NaN	NaN
Zika / QC	C9JF17;P05090	C9JF17;P05090	0.180287	0.180287	0.0396051	0.0216123	148	C9JF17;P05090	APOD	Apolipoprotein D (Fragment);Apolipoprotein D	C9JF17_HUMAN;APOD_HUMAN	14	13.3109	1.13311	Zika	QC	NaN	NaN	NaN
Zika / QC	P02768	P02768	0.156273	0.156273	0.0406776	0.0221389	148	P02768	ALB	Serum albumin	ALBU_HUMAN	148	11.4404	1.1144	Zika	QC	NaN	NaN	NaN
Zika / QC	P02787	P02787	0.138445	0.138445	0.0408157	0.0221556	148	P02787	TF	Serotransferrin	TRFE_HUMAN	116	10.0718	1.10072	Zika	QC	NaN	NaN	NaN
Zika / QC	A0A0B4J269;G3V2A3;P07437;P68371;Q13509;Q13509-2;Q5JP53;Q5ST81	A0A0B4J269;G3V2A3;P07437;P68371;Q13509;Q13509-2;Q5JP53;Q5ST81	1.69031	1.69031	0.0431372	0.0232248	22	A0A0B4J269;G3V2A3;P07437;P68371;Q13509;Q13509-2;Q5JP53;Q5ST81	;TUBB3;TUBB;TUBB4B;TUBB3;TUBB3;TUBB;TUBB	Uncharacterized protein;Tubulin beta chain (Fragment);Tubulin beta chain;Tubulin beta-4B chain;Tubulin beta-3 chain;Isoform 2 of Tubulin beta-3 chain;Tubulin beta chain;Tubulin beta chain	A0A0B4J269_HUMAN;G3V2A3_HUMAN;TBB5_HUMAN;TBB4B_HUMAN;TBB3_HUMAN;TBB3_HUMAN;Q5JP53_HUMAN;Q5ST81_HUMAN	3	222.726	3.22726	Zika	QC	NaN	NaN	NaN
Zika / QC	E7END6;P04070;P04070-2	E7END6;P04070;P04070-2	0.163343	0.163343	0.047788	0.025372	148	E7END6;P04070;P04070-2	PROC	Vitamin K-dependent protein C;Vitamin K-dependent protein C;Isoform 2 of Vitamin K-dependent protein C	E7END6_HUMAN;PROC_HUMAN;PROC_HUMAN	11	11.9879	1.11988	Zika	QC	NaN	NaN	NaN
Zika / QC	P19652	P19652	-0.202075	0.202075	0.0487894	0.025837	148	P19652	ORM2	Alpha-1-acid glycoprotein 2	A1AG2_HUMAN	21	-13.0701	0.869299	Zika	QC	NaN	NaN	NaN
Zika / QC	Q15848	Q15848	0.298665	0.298665	0.0498442	0.0262942	138	Q15848	ADIPOQ	Adiponectin	ADIPO_HUMAN	5	23.0006	1.23001	Zika	QC	NaN	NaN	NaN
Zika / QC	F5GX41;F5GXY9;P12318;P12318-2;V9GY83	F5GX41;F5GXY9;P12318;P12318-2;V9GY83	0.0449064	0.0449064	0.0513631	0.0270263	44	F5GX41;F5GXY9;P12318;P12318-2;V9GY83	FCGR2A	Low affinity immunoglobulin gamma Fc region receptor II-a;Low affinity immunoglobulin gamma Fc region receptor II-a;Low affinity immunoglobulin gamma Fc region receptor II-a;Isoform 2 of Low affinity immunoglobulin gamma Fc region receptor II-a;Low affinity immunoglobulin gamma Fc region receptor II-a (Fragment)	F5GX41_HUMAN;F5GXY9_HUMAN;FCG2A_HUMAN;FCG2A_HUMAN;V9GY83_HUMAN	2	3.16162	1.03162	Zika	QC	NaN	NaN	NaN
Zika / QC	P01602	P01602	-0.0665403	0.0665403	0.0520645	0.0273256	148	P01602	IGKV1-5	Immunoglobulin kappa variable 1-5	KV105_HUMAN	5	-4.50748	0.954925	Zika	QC	NaN	NaN	NaN
Zika / QC	A0A0A0MT69	A0A0A0MT69	0.278911	0.278911	0.0527532	0.0275467	146	A0A0A0MT69	IGKJ4	Immunoglobulin kappa joining 4 (Fragment)	A0A0A0MT69_HUMAN	1	21.3279	1.21328	Zika	QC	NaN	NaN	NaN
Zika / QC	Q68DL7	Q68DL7	-0.0928596	0.0928596	0.0714049	0.0360967	132	Q68DL7	C18orf63	Uncharacterized protein C18orf63	CR063_HUMAN	1	-6.23377	0.937662	Zika	QC	NaN	NaN	NaN
Zika / QC	P04196	P04196	-0.236138	0.236138	0.0750589	0.0376881	148	P04196	HRG	Histidine-rich glycoprotein	HRG_HUMAN	29	-15.0985	0.849015	Zika	QC	NaN	NaN	NaN
Zika / QC	A0A075B6K0	A0A075B6K0	-0.329609	0.329609	0.0756894	0.0379368	96	A0A075B6K0	IGLV3-16	Immunoglobulin lambda variable 3-16	LV316_HUMAN	2	-20.4248	0.795752	Zika	QC	NaN	NaN	NaN
Zika / QC	P55058	P55058	0.212427	0.212427	0.0770372	0.0385186	148	P55058	PLTP	Phospholipid transfer protein	PLTP_HUMAN	13	15.8636	1.15864	Zika	QC	NaN	NaN	NaN
Zika / QC	P01009	P01009	-0.0743425	0.0743425	0.0776894	0.0387976	148	P01009	SERPINA1	Alpha-1-antitrypsin	A1AT_HUMAN	55	-5.02251	0.949775	Zika	QC	NaN	NaN	NaN
Zika / QC	B5MDF5;J3KQE5;P62826	B5MDF5;J3KQE5;P62826	-1.40398	1.40398	0.0780026	0.0388598	54	B5MDF5;J3KQE5;P62826	RAN	GTP-binding nuclear protein Ran;GTP-binding nuclear protein Ran (Fragment);GTP-binding nuclear protein Ran	B5MDF5_HUMAN;J3KQE5_HUMAN;RAN_HUMAN	3	-62.2114	0.377886	Zika	QC	NaN	NaN	NaN
Zika / QC	P01860	P01860	-0.119432	0.119432	0.0829804	0.0410912	148	P01860	IGHG3	Immunoglobulin heavy constant gamma 3	IGHG3_HUMAN	25	-7.945	0.92055	Zika	QC	NaN	NaN	NaN
Zika / QC	E7ETH0;G3XAM2;P05156	E7ETH0;G3XAM2;P05156	0.103131	0.103131	0.0847401	0.0419123	148	E7ETH0;G3XAM2;P05156	CFI	Complement factor I	E7ETH0_HUMAN;G3XAM2_HUMAN;CFAI_HUMAN	29	7.41019	1.0741	Zika	QC	NaN	NaN	NaN
Zika / QC	P01766	P01766	-0.0954304	0.0954304	0.0870899	0.0428686	148	P01766	IGHV3-13	Immunoglobulin heavy variable 3-13	HV313_HUMAN	3	-6.4007	0.935993	Zika	QC	NaN	NaN	NaN
Zika / QC	P80188;P80188-2;X6R8F3	P80188;P80188-2;X6R8F3	-0.115269	0.115269	0.0876965	0.0430643	74	P80188;P80188-2;X6R8F3	LCN2	Neutrophil gelatinase-associated lipocalin;Isoform 2 of Neutrophil gelatinase-associated lipocalin;Neutrophil gelatinase-associated lipocalin	NGAL_HUMAN;NGAL_HUMAN;X6R8F3_HUMAN	3	-7.67897	0.92321	Zika	QC	NaN	NaN	NaN
Zika / QC	O75882-2	O75882-2	0.125963	0.125963	0.0878616	0.043094	148	O75882-2	ATRN	Isoform 2 of Attractin	ATRN_HUMAN	43	9.1236	1.09124	Zika	QC	NaN	NaN	NaN
Zika / QC	P62258	P62258	0.316229	0.316229	0.0880886	0.043154	78	P62258	YWHAE	14-3-3 protein epsilon	1433E_HUMAN	6	24.5072	1.24507	Zika	QC	NaN	NaN	NaN
Zika / QC	P09871	P09871	-0.0589207	0.0589207	0.0882123	0.0431633	148	P09871	C1S	Complement C1s subcomponent	C1S_HUMAN	44	-4.0018	0.959982	Zika	QC	NaN	NaN	NaN
Zika / QC	A0A0J9YXX1	A0A0J9YXX1	1.16659	1.16659	0.0889754	0.0433821	102	A0A0J9YXX1	IGHV5-10-1	Immunoglobulin heavy variable 5-10-1	HV5X1_HUMAN	3	124.48	2.2448	Zika	QC	NaN	NaN	NaN
Zika / QC	P02747	P02747	-0.101111	0.101111	0.089625	0.0436472	148	P02747	C1QC	Complement C1q subcomponent subunit C	C1QC_HUMAN	10	-6.76853	0.932315	Zika	QC	NaN	NaN	NaN
Zika / QC	P23083	P23083	-0.197681	0.197681	0.0925401	0.0448548	148	P23083	IGHV1-2	Immunoglobulin heavy variable 1-2	HV102_HUMAN	5	-12.8049	0.871951	Zika	QC	NaN	NaN	NaN
Zika / QC	Q12805;Q12805-2;Q12805-4	Q12805;Q12805-2;Q12805-4	-0.0790334	0.0790334	0.0932181	0.0451303	148	Q12805;Q12805-2;Q12805-4	EFEMP1	EGF-containing fibulin-like extracellular matrix protein 1;Isoform 2 of EGF-containing fibulin-like extracellular matrix protein 1;Isoform 4 of EGF-containing fibulin-like extracellular matrix protein 1	FBLN3_HUMAN	19	-5.33083	0.946692	Zika	QC	NaN	NaN	NaN
Zika / QC	A0A075B6I4;A0A1W2PQ80	A0A075B6I4;A0A1W2PQ80	0.334984	0.334984	0.096657	0.0464675	124	A0A075B6I4;A0A1W2PQ80	IGLV10-54	Immunoglobulin lambda variable 10-54	LVX54_HUMAN;A0A1W2PQ80_HUMAN	1	26.1363	1.26136	Zika	QC	NaN	NaN	NaN
Zika / QC	P20160	P20160	0.667016	0.667016	0.0968887	0.0465247	44	P20160	AZU1	Azurocidin	CAP7_HUMAN	4	58.7786	1.58779	Zika	QC	NaN	NaN	NaN
Zika / QC	A0A087WYK1;Q00887	A0A087WYK1;Q00887	-1.09214	1.09214	0.0975887	0.0468062	26	A0A087WYK1;Q00887	PSG9	Pregnancy-specific beta-1-glycoprotein 9	A0A087WYK1_HUMAN;PSG9_HUMAN	3	-53.0934	0.469066	Zika	QC	NaN	NaN	NaN
Zika / QC	Q03591	Q03591	0.173907	0.173907	0.100392	0.0478759	148	Q03591	CFHR1	Complement factor H-related protein 1	FHR1_HUMAN	9	12.8109	1.12811	Zika	QC	NaN	NaN	NaN
Zika / QC	P05164;P05164-2;P05164-3	P05164;P05164-2;P05164-3	-0.0154009	0.0154009	0.1004	0.0478759	108	P05164;P05164-2;P05164-3	MPO	Myeloperoxidase;Isoform H14 of Myeloperoxidase;Isoform H7 of Myeloperoxidase	PERM_HUMAN	19	-1.06183	0.989382	Zika	QC	NaN	NaN	NaN
Zika / QC	P22692;P22692-2	P22692;P22692-2	0.234412	0.234412	0.103025	0.0489579	38	P22692;P22692-2	IGFBP4	Insulin-like growth factor-binding protein 4;Isoform 2 of Insulin-like growth factor-binding protein 4	IBP4_HUMAN	4	17.6427	1.17643	Zika	QC	NaN	NaN	NaN
Zika / QC	D6R934;P02746	D6R934;P02746	0.136315	0.136315	0.10393	0.049274	148	D6R934;P02746	C1QB	Complement C1q subcomponent subunit B	D6R934_HUMAN;C1QB_HUMAN	13	9.9094	1.09909	Zika	QC	NaN	NaN	NaN
Zika / QC	A0A0C4DH32	A0A0C4DH32	0.0994792	0.0994792	0.104114	0.0493047	74	A0A0C4DH32	IGHV3-20	Immunoglobulin heavy variable 3-20	HV320_HUMAN	2	7.13866	1.07139	Zika	QC	NaN	NaN	NaN
Zika / QC	A0A0A0MSA9;A0A0C4DG49;P15151;P15151-2;P15151-3;P15151-4	A0A0A0MSA9;A0A0C4DG49;P15151;P15151-2;P15151-3;P15151-4	-0.0014909	0.0014909	0.104814	0.0495792	78	A0A0A0MSA9;A0A0C4DG49;P15151;P15151-2;P15151-3;P15151-4	PVR	Poliovirus receptor;Poliovirus receptor;Poliovirus receptor;Isoform Beta of Poliovirus receptor;Isoform Gamma of Poliovirus receptor;Isoform Delta of Poliovirus receptor	A0A0A0MSA9_HUMAN;A0A0C4DG49_HUMAN;PVR_HUMAN;PVR_HUMAN;PVR_HUMAN;PVR_HUMAN	3	-0.103288	0.998967	Zika	QC	NaN	NaN	NaN
Zika / QC	P01031	P01031	0.108121	0.108121	0.108934	0.0510588	148	P01031	C5	Complement C5	CO5_HUMAN	116	7.78234	1.07782	Zika	QC	NaN	NaN	NaN
Zika / QC	P14625	P14625	-0.45433	0.45433	0.108893	0.0510588	60	P14625	HSP90B1	Endoplasmin	ENPL_HUMAN	9	-27.0151	0.729849	Zika	QC	NaN	NaN	NaN
Zika / QC	A0A0A0MRZ9	A0A0A0MRZ9	-0.0575343	0.0575343	0.109179	0.0511158	34	A0A0A0MRZ9	IGLV5-52	Immunoglobulin lambda variable 5-52	LV552_HUMAN	2	-3.9095	0.960905	Zika	QC	NaN	NaN	NaN
Zika / QC	A0A0J9YW62	A0A0J9YW62	0.397815	0.397815	0.109577	0.0512439	86	A0A0J9YW62	NaN	Uncharacterized protein (Fragment)	A0A0J9YW62_HUMAN	1	31.7511	1.31751	Zika	QC	NaN	NaN	NaN
Zika / QC	A0A0C4DH38	A0A0C4DH38	-0.12317	0.12317	0.113855	0.052765	148	A0A0C4DH38	IGHV5-51	Immunoglobulin heavy variable 5-51	HV551_HUMAN	8	-8.1832	0.918168	Zika	QC	NaN	NaN	NaN
Zika / QC	A0A0C4DH55;A0A0C4DH90	A0A0C4DH55;A0A0C4DH90	-0.0449809	0.0449809	0.114309	0.0528565	144	A0A0C4DH55;A0A0C4DH90	IGKV3D-7;IGKV3OR2-268	Immunoglobulin kappa variable 3D-7;Immunoglobulin kappa variable 3/OR2-268 (non-functional) (Fragment)	KVD07_HUMAN;A0A0C4DH90_HUMAN	1	-3.06974	0.969303	Zika	QC	NaN	NaN	NaN
Zika / QC	P43121	P43121	0.196573	0.196573	0.114949	0.0530929	90	P43121	MCAM	Cell surface glycoprotein MUC18	MUC18_HUMAN	8	14.5973	1.14597	Zika	QC	NaN	NaN	NaN
Zika / QC	A0A0G2JMB2	A0A0G2JMB2	-0.120198	0.120198	0.116207	0.0533749	146	A0A0G2JMB2	IGHA2	Immunoglobulin heavy constant alpha 2 (Fragment)	A0A0G2JMB2_HUMAN	27	-7.99386	0.920061	Zika	QC	NaN	NaN	NaN
Zika / QC	P01742	P01742	0.108268	0.108268	0.116705	0.0534845	146	P01742	IGHV1-69	Immunoglobulin heavy variable 1-69	HV169_HUMAN	2	7.7933	1.07793	Zika	QC	NaN	NaN	NaN
Zika / QC	D6RF35	D6RF35	0.00477772	0.00477772	0.126185	0.0568176	136	D6RF35	GC	Vitamin D-binding protein	D6RF35_HUMAN	3	0.331716	1.00332	Zika	QC	NaN	NaN	NaN
Zika / QC	P15814	P15814	-0.172552	0.172552	0.127484	0.057215	148	P15814	IGLL1	Immunoglobulin lambda-like polypeptide 1	IGLL1_HUMAN	4	-11.2728	0.887272	Zika	QC	NaN	NaN	NaN
Zika / QC	P06331	P06331	-0.0415427	0.0415427	0.128375	0.0574898	148	P06331	IGHV4-34	Immunoglobulin heavy variable 4-34	HV434_HUMAN	5	-2.83846	0.971615	Zika	QC	NaN	NaN	NaN
Zika / QC	P07996	P07996	0.136928	0.136928	0.138799	0.0614236	148	P07996	THBS1	Thrombospondin-1	TSP1_HUMAN	57	9.95616	1.09956	Zika	QC	NaN	NaN	NaN
Zika / QC	Q92820	Q92820	0.772411	0.772411	0.14092	0.0621618	68	Q92820	GGH	Gamma-glutamyl hydrolase	GGH_HUMAN	6	70.8122	1.70812	Zika	QC	NaN	NaN	NaN
Zika / QC	P23381	P23381	0.125972	0.125972	0.141846	0.0625034	30	P23381	WARS	Tryptophan--tRNA ligase, cytoplasmic	SYWC_HUMAN	4	9.12428	1.09124	Zika	QC	NaN	NaN	NaN
Zika / QC	P02743	P02743	0.172548	0.172548	0.146223	0.0641575	148	P02743	APCS	Serum amyloid P-component	SAMP_HUMAN	14	12.7048	1.12705	Zika	QC	NaN	NaN	NaN
Zika / QC	P16930;P16930-2	P16930;P16930-2	-0.792456	0.792456	0.150595	0.0656598	40	P16930;P16930-2	FAH	Fumarylacetoacetase;Isoform 2 of Fumarylacetoacetase	FAAA_HUMAN	4	-42.264	0.57736	Zika	QC	NaN	NaN	NaN
Zika / QC	A0A075B6K4	A0A075B6K4	-0.0636695	0.0636695	0.152539	0.0663193	148	A0A075B6K4	IGLV3-10	Immunoglobulin lambda variable 3-10	LV310_HUMAN	7	-4.31727	0.956827	Zika	QC	NaN	NaN	NaN
Zika / QC	P01699	P01699	-0.0330578	0.0330578	0.154926	0.0671183	148	P01699	IGLV1-44	Immunoglobulin lambda variable 1-44	LV144_HUMAN	3	-2.26534	0.977347	Zika	QC	NaN	NaN	NaN
Zika / QC	A0A0B4J231;B9A064	A0A0B4J231;B9A064	-0.0211637	0.0211637	0.159832	0.0688097	148	A0A0B4J231;B9A064	IGLL5	Immunoglobulin lambda-like polypeptide 5	A0A0B4J231_HUMAN;IGLL5_HUMAN	9	-1.45625	0.985438	Zika	QC	NaN	NaN	NaN
Zika / QC	P60709;P63261	P60709;P63261	-0.202463	0.202463	0.163341	0.0701935	148	P60709;P63261	ACTB;ACTG1	Actin, cytoplasmic 1;Actin, cytoplasmic 2	ACTB_HUMAN;ACTG_HUMAN	26	-13.0934	0.869066	Zika	QC	NaN	NaN	NaN
Zika / QC	P00734	P00734	0.103038	0.103038	0.165278	0.0709317	148	P00734	F2	Prothrombin	THRB_HUMAN	39	7.40325	1.07403	Zika	QC	NaN	NaN	NaN
Zika / QC	Q9BXR6	Q9BXR6	0.000797838	0.000797838	0.165822	0.0710912	140	Q9BXR6	CFHR5	Complement factor H-related protein 5	FHR5_HUMAN	21	0.0553172	1.00055	Zika	QC	NaN	NaN	NaN
Zika / QC	H0Y2Y8;Q15942	H0Y2Y8;Q15942	-0.0448392	0.0448392	0.168634	0.072063	28	H0Y2Y8;Q15942	ZYX	Zyxin (Fragment);Zyxin	H0Y2Y8_HUMAN;ZYX_HUMAN	3	-3.06021	0.969398	Zika	QC	NaN	NaN	NaN
Zika / QC	P28072	P28072	1.61339	1.61339	0.171884	0.0732329	30	P28072	PSMB6	Proteasome subunit beta type-6	PSB6_HUMAN	3	205.97	3.0597	Zika	QC	NaN	NaN	NaN
Zika / QC	Q02985;Q02985-2	Q02985;Q02985-2	0.0789416	0.0789416	0.175033	0.0742672	72	Q02985;Q02985-2	CFHR3	Complement factor H-related protein 3;Isoform 2 of Complement factor H-related protein 3	FHR3_HUMAN	3	5.62429	1.05624	Zika	QC	NaN	NaN	NaN
Zika / QC	P23142-4	P23142-4	-0.223142	0.223142	0.177224	0.0750426	148	P23142-4	FBLN1	Isoform C of Fibulin-1	FBLN1_HUMAN	10	-14.3303	0.856697	Zika	QC	NaN	NaN	NaN
Zika / QC	J3KRP0	J3KRP0	-0.253671	0.253671	0.178336	0.0754359	88	J3KRP0	CNDP1	Beta-Ala-His dipeptidase	J3KRP0_HUMAN	1	-16.1241	0.838759	Zika	QC	NaN	NaN	NaN
Zika / QC	A0A0A0MS14	A0A0A0MS14	-0.13304	0.13304	0.179637	0.0758302	148	A0A0A0MS14	IGHV1-45	Immunoglobulin heavy variable 1-45	HV145_HUMAN	3	-8.80921	0.911908	Zika	QC	NaN	NaN	NaN
Zika / QC	E9PEK4;P07333	E9PEK4;P07333	-0.282031	0.282031	0.184181	0.0771163	34	E9PEK4;P07333	CSF1R	Macrophage colony-stimulating factor 1 receptor	E9PEK4_HUMAN;CSF1R_HUMAN	8	-17.7568	0.822432	Zika	QC	NaN	NaN	NaN
Zika / QC	A0A0B4J1U7	A0A0B4J1U7	-0.114025	0.114025	0.185819	0.0775659	148	A0A0B4J1U7	IGHV6-1	Immunoglobulin heavy variable 6-1	HV601_HUMAN	9	-7.59933	0.924007	Zika	QC	NaN	NaN	NaN
Zika / QC	P37837	P37837	0.275557	0.275557	0.193292	0.0801168	44	P37837	TALDO1	Transaldolase	TALDO_HUMAN	4	21.0461	1.21046	Zika	QC	NaN	NaN	NaN
Zika / QC	P09960;P09960-2	P09960;P09960-2	0.591215	0.591215	0.194461	0.0805206	12	P09960;P09960-2	LTA4H	Leukotriene A-4 hydrolase;Isoform 2 of Leukotriene A-4 hydrolase	LKHA4_HUMAN	4	50.6515	1.50651	Zika	QC	NaN	NaN	NaN
Zika / QC	P01601	P01601	-0.102617	0.102617	0.19562	0.0808378	146	P01601	IGKV1D-16	Immunoglobulin kappa variable 1D-16 (Fragment)	KVD16_HUMAN	2	-6.86582	0.931342	Zika	QC	NaN	NaN	NaN
Zika / QC	P43251;P43251-2;P43251-3;P43251-4	P43251;P43251-2;P43251-3;P43251-4	0.126775	0.126775	0.198173	0.0817291	148	P43251;P43251-2;P43251-3;P43251-4	BTD	Biotinidase;Isoform 2 of Biotinidase;Isoform 3 of Biotinidase;Isoform 4 of Biotinidase	BTD_HUMAN	9	9.18506	1.09185	Zika	QC	NaN	NaN	NaN
Zika / QC	P08697	P08697	0.144682	0.144682	0.209915	0.0858838	148	P08697	SERPINF2	Alpha-2-antiplasmin	A2AP_HUMAN	31	10.5487	1.10549	Zika	QC	NaN	NaN	NaN
Zika / QC	P08185	P08185	-0.0413597	0.0413597	0.209775	0.0858838	148	P08185	SERPINA6	Corticosteroid-binding globulin	CBG_HUMAN	15	-2.82613	0.971739	Zika	QC	NaN	NaN	NaN
Zika / QC	Q96PD5	Q96PD5	-0.219729	0.219729	0.213491	0.0868293	148	Q96PD5	PGLYRP2	N-acetylmuramoyl-L-alanine amidase	PGRP2_HUMAN	33	-14.1274	0.858726	Zika	QC	NaN	NaN	NaN
Zika / QC	A0A0C4DH73;P01611	A0A0C4DH73;P01611	0.379897	0.379897	0.222208	0.0898427	148	A0A0C4DH73;P01611	IGKV1-12;IGKV1D-12	Immunoglobulin kappa variable 1-12;Immunoglobulin kappa variable 1D-12	KV112_HUMAN;KVD12_HUMAN	2	30.1249	1.30125	Zika	QC	NaN	NaN	NaN
Zika / QC	P98160	P98160	-0.120519	0.120519	0.223378	0.0902274	68	P98160	HSPG2	Basement membrane-specific heparan sulfate proteoglycan core protein	PGBM_HUMAN	27	-8.01433	0.919857	Zika	QC	NaN	NaN	NaN
Zika / QC	P0DP08	P0DP08	-0.0844896	0.0844896	0.229241	0.0923239	36	P0DP08	IGHV4-38-2	Immunoglobulin heavy variable 4-38-2	HVD82_HUMAN	2	-5.68819	0.943118	Zika	QC	NaN	NaN	NaN
Zika / QC	A0A087X1J7;P22352	A0A087X1J7;P22352	0.125102	0.125102	0.229479	0.0923294	148	A0A087X1J7;P22352	GPX3	Glutathione peroxidase;Glutathione peroxidase 3	A0A087X1J7_HUMAN;GPX3_HUMAN	9	9.05845	1.09058	Zika	QC	NaN	NaN	NaN
Zika / QC	J3QQR8;J3QQX6;J3QRQ1;P13598	J3QQR8;J3QQX6;J3QRQ1;P13598	-0.105661	0.105661	0.233097	0.0936025	92	J3QQR8;J3QQX6;J3QRQ1;P13598	ICAM2	Intercellular adhesion molecule 2 (Fragment);Intercellular adhesion molecule 2 (Fragment);Intercellular adhesion molecule 2 (Fragment);Intercellular adhesion molecule 2	J3QQR8_HUMAN;J3QQX6_HUMAN;J3QRQ1_HUMAN;ICAM2_HUMAN	4	-7.06212	0.929379	Zika	QC	NaN	NaN	NaN
Zika / QC	P07900;P07900-2	P07900;P07900-2	4.26682	4.26682	0.233434	0.0936465	40	P07900;P07900-2	HSP90AA1	Heat shock protein HSP 90-alpha;Isoform 2 of Heat shock protein HSP 90-alpha	HS90A_HUMAN	9	1825.04	19.2504	Zika	QC	NaN	NaN	NaN
Zika / QC	Q5T7N2	Q5T7N2	-0.377062	0.377062	0.234113	0.0938206	148	Q5T7N2	L1TD1	LINE-1 type transposase domain-containing protein 1	LITD1_HUMAN	1	-22.9996	0.770004	Zika	QC	NaN	NaN	NaN
Zika / QC	P05362	P05362	1.25013	1.25013	0.234551	0.0938206	14	P05362	ICAM1	Intercellular adhesion molecule 1	ICAM1_HUMAN	9	137.863	2.37863	Zika	QC	NaN	NaN	NaN
Zika / QC	O00187	O00187	0.0451335	0.0451335	0.238168	0.0949906	138	O00187	MASP2	Mannan-binding lectin serine protease 2	MASP2_HUMAN	12	3.17786	1.03178	Zika	QC	NaN	NaN	NaN
Zika / QC	P10721;P10721-2;P10721-3	P10721;P10721-2;P10721-3	0.970106	0.970106	0.239023	0.0951473	28	P10721;P10721-2;P10721-3	KIT	Mast/stem cell growth factor receptor Kit;Isoform 2 of Mast/stem cell growth factor receptor Kit;Isoform 3 of Mast/stem cell growth factor receptor Kit	KIT_HUMAN	4	95.8985	1.95898	Zika	QC	NaN	NaN	NaN
Zika / QC	F8VYK9;P24592	F8VYK9;P24592	0.722299	0.722299	0.239629	0.0952963	38	F8VYK9;P24592	IGFBP6	Insulin-like growth factor-binding protein 6	F8VYK9_HUMAN;IBP6_HUMAN	4	64.9809	1.64981	Zika	QC	NaN	NaN	NaN
Zika / QC	A0A0C4DH72	A0A0C4DH72	-0.109677	0.109677	0.240746	0.0956482	148	A0A0C4DH72	IGKV1-6	Immunoglobulin kappa variable 1-6	KV106_HUMAN	5	-7.32044	0.926796	Zika	QC	NaN	NaN	NaN
Zika / QC	B7ZKJ8	B7ZKJ8	0.0829582	0.0829582	0.244243	0.0969444	72	B7ZKJ8	ITIH4	ITIH4 protein	B7ZKJ8_HUMAN	1	5.91877	1.05919	Zika	QC	NaN	NaN	NaN
Zika / QC	P01859	P01859	-0.0605489	0.0605489	0.246495	0.0975562	148	P01859	IGHG2	Immunoglobulin heavy constant gamma 2	IGHG2_HUMAN	18	-4.11008	0.958899	Zika	QC	NaN	NaN	NaN
Zika / QC	Q9BUN1	Q9BUN1	0.552288	0.552288	0.253195	0.0998241	38	Q9BUN1	MENT	Protein MENT	MENT_HUMAN	3	46.641	1.46641	Zika	QC	NaN	NaN	NaN
Zika / QC	A0A087WTE4;A0A087WTF6;A0A087WV75;A0A087WWD4;A0A087WX77;H7BYX6;P13591;P13591-1;P13591-3;P13591-4	A0A087WTE4;A0A087WTF6;A0A087WV75;A0A087WWD4;A0A087WX77;H7BYX6;P13591;P13591-1;P13591-3;P13591-4	0.4465	0.4465	0.255259	0.100254	42	A0A087WTE4;A0A087WTF6;A0A087WV75;A0A087WWD4;A0A087WX77;H7BYX6;P13591;P13591-1;P13591-3;P13591-4	NCAM1	Neural cell adhesion molecule 1;Neural cell adhesion molecule 1;Neural cell adhesion molecule 1;Neural cell adhesion molecule 1;Neural cell adhesion molecule 1;Neural cell adhesion molecule 1;Neural cell adhesion molecule 1;Isoform 2 of Neural cell adhesion molecule 1;Isoform 3 of Neural cell adhesion molecule 1;Isoform 4 of Neural cell adhesion molecule 1	A0A087WTE4_HUMAN;A0A087WTF6_HUMAN;A0A087WV75_HUMAN;A0A087WWD4_HUMAN;A0A087WX77_HUMAN;H7BYX6_HUMAN;NCAM1_HUMAN;NCAM1_HUMAN;NCAM1_HUMAN;NCAM1_HUMAN	13	36.2731	1.36273	Zika	QC	NaN	NaN	NaN
Zika / QC	P01591	P01591	0.0444831	0.0444831	0.261199	0.102004	148	P01591	JCHAIN	Immunoglobulin J chain	IGJ_HUMAN	16	3.13136	1.03131	Zika	QC	NaN	NaN	NaN
Zika / QC	J3KNB4;P49913	J3KNB4;P49913	0.0280631	0.0280631	0.262602	0.102343	98	J3KNB4;P49913	CAMP	Cathelicidin antimicrobial peptide	J3KNB4_HUMAN;CAMP_HUMAN	6	1.96423	1.01964	Zika	QC	NaN	NaN	NaN
Zika / QC	P80723;P80723-2	P80723;P80723-2	0.274982	0.274982	0.262813	0.102343	26	P80723;P80723-2	BASP1	Brain acid soluble protein 1;Isoform 2 of Brain acid soluble protein 1	BASP1_HUMAN	4	20.9979	1.20998	Zika	QC	NaN	NaN	NaN
Zika / QC	P20618	P20618	0.758995	0.758995	0.262574	0.102343	26	P20618	PSMB1	Proteasome subunit beta type-1	PSB1_HUMAN	1	69.2311	1.69231	Zika	QC	NaN	NaN	NaN
Zika / QC	P02774;P02774-3	P02774;P02774-3	0.0508225	0.0508225	0.263132	0.102371	148	P02774;P02774-3	GC	Vitamin D-binding protein;Isoform 3 of Vitamin D-binding protein	VTDB_HUMAN	66	3.58553	1.03586	Zika	QC	NaN	NaN	NaN
Zika / QC	P04264	P04264	-3.53833	3.53833	0.264969	0.102988	40	P04264	KRT1	Keratin, type II cytoskeletal 1	K2C1_HUMAN	19	-91.3929	0.0860707	Zika	QC	NaN	NaN	NaN
Zika / QC	P01721	P01721	0.0343743	0.0343743	0.290396	0.111503	130	P01721	IGLV6-57	Immunoglobulin lambda variable 6-57	LV657_HUMAN	2	2.41125	1.02411	Zika	QC	NaN	NaN	NaN
Zika / QC	A0A087X0I0;A0A140T8Y3;A0A140T8Z8;A0A140T9C0;A0A140T9L7;A0A140TA41;A0A140TA52;P22105;P22105-3;P22105-4	A0A087X0I0;A0A140T8Y3;A0A140T8Z8;A0A140T9C0;A0A140T9L7;A0A140TA41;A0A140TA52;P22105;P22105-3;P22105-4	-0.759211	0.759211	0.29112	0.111677	110	A0A087X0I0;A0A140T8Y3;A0A140T8Z8;A0A140T9C0;A0A140T9L7;A0A140TA41;A0A140TA52;P22105;P22105-3;P22105-4	TNXB	Tenascin-X;Tenascin-X;Tenascin-X (Fragment);Tenascin-X;Tenascin-X (Fragment);Tenascin-X;Tenascin-X;Tenascin-X;Isoform 4 of Tenascin-X;Isoform 5 of Tenascin-X	A0A087X0I0_HUMAN;A0A140T8Y3_HUMAN;A0A140T8Z8_HUMAN;A0A140T9C0_HUMAN;A0A140T9L7_HUMAN;A0A140TA41_HUMAN;A0A140TA52_HUMAN;TENX_HUMAN;TENX_HUMAN;TENX_HUMAN	18	-40.9181	0.590819	Zika	QC	NaN	NaN	NaN
Zika / QC	J3KPS3;P04075;P04075-2	J3KPS3;P04075;P04075-2	0.331096	0.331096	0.299348	0.113985	56	J3KPS3;P04075;P04075-2	ALDOA	Fructose-bisphosphate aldolase;Fructose-bisphosphate aldolase A;Isoform 2 of Fructose-bisphosphate aldolase A	J3KPS3_HUMAN;ALDOA_HUMAN;ALDOA_HUMAN	8	25.7968	1.25797	Zika	QC	NaN	NaN	NaN
Zika / QC	E7ENL6;P12111;P12111-2;P12111-4	E7ENL6;P12111;P12111-2;P12111-4	1.05891	1.05891	0.303292	0.115167	58	E7ENL6;P12111;P12111-2;P12111-4	COL6A3	Collagen alpha-3(VI) chain;Collagen alpha-3(VI) chain;Isoform 2 of Collagen alpha-3(VI) chain;Isoform 4 of Collagen alpha-3(VI) chain	E7ENL6_HUMAN;CO6A3_HUMAN;CO6A3_HUMAN;CO6A3_HUMAN	22	108.335	2.08335	Zika	QC	NaN	NaN	NaN
Zika / QC	P13671	P13671	-0.0458348	0.0458348	0.306017	0.115882	148	P13671	C6	Complement component C6	CO6_HUMAN	63	-3.12709	0.968729	Zika	QC	NaN	NaN	NaN
Zika / QC	P01780	P01780	-0.00611179	0.00611179	0.319929	0.119828	148	P01780	IGHV3-7	Immunoglobulin heavy variable 3-7	HV307_HUMAN	8	-0.422741	0.995773	Zika	QC	NaN	NaN	NaN
Zika / QC	P01704	P01704	-0.162805	0.162805	0.322398	0.120533	124	P01704	IGLV2-14	Immunoglobulin lambda variable 2-14	LV214_HUMAN	1	-10.6713	0.893287	Zika	QC	NaN	NaN	NaN
Zika / QC	P02748	P02748	-0.00492614	0.00492614	0.327767	0.121987	148	P02748	C9	Complement component C9	CO9_HUMAN	51	-0.340871	0.996591	Zika	QC	NaN	NaN	NaN
Zika / QC	P01033;Q5H9A7	P01033;Q5H9A7	-0.319963	0.319963	0.328627	0.122197	60	P01033;Q5H9A7	TIMP1	Metalloproteinase inhibitor 1	TIMP1_HUMAN;Q5H9A7_HUMAN	3	-19.8909	0.801091	Zika	QC	NaN	NaN	NaN
Zika / QC	P51884	P51884	0.145303	0.145303	0.32906	0.122213	148	P51884	LUM	Lumican	LUM_HUMAN	21	10.5963	1.10596	Zika	QC	NaN	NaN	NaN
Zika / QC	A0A0C4DGZ8;P07359	A0A0C4DGZ8;P07359	0.420588	0.420588	0.332306	0.123231	68	A0A0C4DGZ8;P07359	GP1BA	Glycoprotein Ib (Platelet), alpha polypeptide;Platelet glycoprotein Ib alpha chain	A0A0C4DGZ8_HUMAN;GP1BA_HUMAN	7	33.8473	1.33847	Zika	QC	NaN	NaN	NaN
Zika / QC	P14151;P14151-2	P14151;P14151-2	-0.0402885	0.0402885	0.332773	0.123293	140	P14151;P14151-2	SELL	L-selectin;Isoform 2 of L-selectin	LYAM1_HUMAN	10	-2.75395	0.97246	Zika	QC	NaN	NaN	NaN
Zika / QC	P08603	P08603	0.0527201	0.0527201	0.337562	0.124843	148	P08603	CFH	Complement factor H	CFAH_HUMAN	118	3.72187	1.03722	Zika	QC	NaN	NaN	NaN
Zika / QC	Q6EMK4	Q6EMK4	-0.177383	0.177383	0.340967	0.12599	142	Q6EMK4	VASN	Vasorin	VASN_HUMAN	10	-11.5695	0.884305	Zika	QC	NaN	NaN	NaN
Zika / QC	P15169	P15169	0.0160473	0.0160473	0.347135	0.127708	148	P15169	CPN1	Carboxypeptidase N catalytic chain	CBPN_HUMAN	17	1.11853	1.01119	Zika	QC	NaN	NaN	NaN
Zika / QC	P01718	P01718	-0.143655	0.143655	0.352342	0.129265	148	P01718	IGLV3-27	Immunoglobulin lambda variable 3-27	LV327_HUMAN	4	-9.47771	0.905223	Zika	QC	NaN	NaN	NaN
Zika / QC	P01042	P01042	0.0969695	0.0969695	0.35371	0.129537	148	P01042	KNG1	Kininogen-1	KNG1_HUMAN	47	6.95245	1.06952	Zika	QC	NaN	NaN	NaN
Zika / QC	P07357	P07357	0.0605885	0.0605885	0.359323	0.131242	148	P07357	C8A	Complement component C8 alpha chain	CO8A_HUMAN	39	4.28911	1.04289	Zika	QC	NaN	NaN	NaN
Zika / QC	Q13103	Q13103	0.0347793	0.0347793	0.361762	0.132016	108	Q13103	SPP2	Secreted phosphoprotein 24	SPP24_HUMAN	4	2.44001	1.0244	Zika	QC	NaN	NaN	NaN
Zika / QC	P00441	P00441	0.218157	0.218157	0.367588	0.133786	54	P00441	SOD1	Superoxide dismutase [Cu-Zn]	SODC_HUMAN	5	16.3247	1.16325	Zika	QC	NaN	NaN	NaN
Zika / QC	E7EUF1;Q13822;Q13822-2;Q13822-3	E7EUF1;Q13822;Q13822-2;Q13822-3	0.190411	0.190411	0.373154	0.135692	44	E7EUF1;Q13822;Q13822-2;Q13822-3	ENPP2	Ectonucleotide pyrophosphatase/phosphodiesterase family member 2;Ectonucleotide pyrophosphatase/phosphodiesterase family member 2;Isoform 2 of Ectonucleotide pyrophosphatase/phosphodiesterase family member 2;Isoform 3 of Ectonucleotide pyrophosphatase/phosphodiesterase family member 2	E7EUF1_HUMAN;ENPP2_HUMAN;ENPP2_HUMAN;ENPP2_HUMAN	12	14.1088	1.14109	Zika	QC	NaN	NaN	NaN
Zika / QC	P20851;P20851-2	P20851;P20851-2	-0.02289	0.02289	0.378233	0.137297	148	P20851;P20851-2	C4BPB	C4b-binding protein beta chain;Isoform 2 of C4b-binding protein beta chain	C4BPB_HUMAN	11	-1.57409	0.984259	Zika	QC	NaN	NaN	NaN
Zika / QC	E9PJ29;Q86UD1	E9PJ29;Q86UD1	0.137285	0.137285	0.39386	0.141845	66	E9PJ29;Q86UD1	OAF	Out at first protein homolog	E9PJ29_HUMAN;OAF_HUMAN	5	9.98332	1.09983	Zika	QC	NaN	NaN	NaN
Zika / QC	A0A0B4J1U3	A0A0B4J1U3	-0.255127	0.255127	0.394251	0.141861	144	A0A0B4J1U3	IGLV1-36	Immunoglobulin lambda variable 1-36	LV136_HUMAN	3	-16.2087	0.837913	Zika	QC	NaN	NaN	NaN
Zika / QC	C9JHR8;F5GZZ9;Q86VB7;Q86VB7-2;Q86VB7-3;Q86VB7-4	C9JHR8;F5GZZ9;Q86VB7;Q86VB7-2;Q86VB7-3;Q86VB7-4	-1.169	1.169	0.397916	0.142792	64	C9JHR8;F5GZZ9;Q86VB7;Q86VB7-2;Q86VB7-3;Q86VB7-4	CD163	Scavenger receptor cysteine-rich type 1 protein M130;Scavenger receptor cysteine-rich type 1 protein M130;Scavenger receptor cysteine-rich type 1 protein M130;Isoform 2 of Scavenger receptor cysteine-rich type 1 protein M130;Isoform 3 of Scavenger receptor cysteine-rich type 1 protein M130;Isoform 4 of Scavenger receptor cysteine-rich type 1 protein M130	C9JHR8_HUMAN;F5GZZ9_HUMAN;C163A_HUMAN;C163A_HUMAN;C163A_HUMAN;C163A_HUMAN	15	-55.5271	0.444729	Zika	QC	NaN	NaN	NaN
Zika / QC	P22792	P22792	-0.0487508	0.0487508	0.408364	0.146012	148	P22792	CPN2	Carboxypeptidase N subunit 2	CPN2_HUMAN	16	-3.32269	0.966773	Zika	QC	NaN	NaN	NaN
Zika / QC	A0A0U1RR32;A0A0U1RRH7;P0C0S8;P20671;Q16777;Q6FI13;Q96KK5;Q99878;Q9BTM1	A0A0U1RR32;A0A0U1RRH7;P0C0S8;P20671;Q16777;Q6FI13;Q96KK5;Q99878;Q9BTM1	-0.195813	0.195813	0.434579	0.153556	112	A0A0U1RR32;A0A0U1RRH7;P0C0S8;P20671;Q16777;Q6FI13;Q96KK5;Q99878;Q9BTM1	HIST1H3D;HIST1H3D;HIST1H2AG;HIST1H2AD;HIST2H2AC;HIST2H2AA3;HIST1H2AH;HIST1H2AJ;H2AFJ	Histone H2A;Histone H2A;Histone H2A type 1;Histone H2A type 1-D;Histone H2A type 2-C;Histone H2A type 2-A;Histone H2A type 1-H;Histone H2A type 1-J;Histone H2A.J	A0A0U1RR32_HUMAN;A0A0U1RRH7_HUMAN;H2A1_HUMAN;H2A1D_HUMAN;H2A2C_HUMAN;H2A2A_HUMAN;H2A1H_HUMAN;H2A1J_HUMAN;H2AJ_HUMAN	3	-12.6919	0.873081	Zika	QC	NaN	NaN	NaN
Zika / QC	P01714	P01714	-0.0858464	0.0858464	0.43529	0.153676	144	P01714	IGLV3-19	Immunoglobulin lambda variable 3-19	LV319_HUMAN	7	-5.77684	0.942232	Zika	QC	NaN	NaN	NaN
Zika / QC	P29622	P29622	0.333918	0.333918	0.438074	0.154394	148	P29622	SERPINA4	Kallistatin	KAIN_HUMAN	22	26.0431	1.26043	Zika	QC	NaN	NaN	NaN
Zika / QC	H0Y512;Q9HDC9	H0Y512;Q9HDC9	0.375599	0.375599	0.45136	0.158294	136	H0Y512;Q9HDC9	APMAP	Adipocyte plasma membrane-associated protein (Fragment);Adipocyte plasma membrane-associated protein	H0Y512_HUMAN;APMAP_HUMAN	13	29.7378	1.29738	Zika	QC	NaN	NaN	NaN
Zika / QC	P02730	P02730	0.000920021	0.000920021	0.461561	0.161429	68	P02730	SLC4A1	Band 3 anion transport protein	B3AT_HUMAN	7	0.0637913	1.00064	Zika	QC	NaN	NaN	NaN
Zika / QC	P01024	P01024	-0.0254865	0.0254865	0.463912	0.161976	148	P01024	C3	Complement C3	CO3_HUMAN	233	-1.75108	0.982489	Zika	QC	NaN	NaN	NaN
Zika / QC	Q9UHG3	Q9UHG3	0.371761	0.371761	0.476445	0.16565	106	Q9UHG3	PCYOX1	Prenylcysteine oxidase 1	PCYOX_HUMAN	7	29.3931	1.29393	Zika	QC	NaN	NaN	NaN
Zika / QC	P07195	P07195	0.40524	0.40524	0.482098	0.167474	126	P07195	LDHB	L-lactate dehydrogenase B chain	LDHB_HUMAN	12	32.4309	1.32431	Zika	QC	NaN	NaN	NaN
Zika / QC	P0C0L5	P0C0L5	-0.0818319	0.0818319	0.482577	0.167499	148	P0C0L5	C4B	Complement C4-B	CO4B_HUMAN	170	-5.51429	0.944857	Zika	QC	NaN	NaN	NaN
Zika / QC	A0A024R6I7	A0A024R6I7	0.154157	0.154157	0.483135	0.167552	90	A0A024R6I7	SERPINA1	Alpha-1-antitrypsin	A0A024R6I7_HUMAN	3	11.2771	1.11277	Zika	QC	NaN	NaN	NaN
Zika / QC	B4DPQ0	B4DPQ0	0.0406421	0.0406421	0.510195	0.174876	148	B4DPQ0	C1R	Complement C1r subcomponent	B4DPQ0_HUMAN	54	2.85715	1.02857	Zika	QC	NaN	NaN	NaN
Zika / QC	A0A075B6Q5	A0A075B6Q5	-0.049257	0.049257	0.517504	0.176939	118	A0A075B6Q5	IGHV3-64	Immunoglobulin heavy variable 3-64	HV364_HUMAN	2	-3.35661	0.966434	Zika	QC	NaN	NaN	NaN
Zika / QC	A0A0B4J2D9;P0DP09	A0A0B4J2D9;P0DP09	0.0269483	0.0269483	0.52195	0.178164	140	A0A0B4J2D9;P0DP09	IGKV1D-13;IGKV1-13	Immunoglobulin kappa variable 1D-13;Immunoglobulin kappa variable 1-13	KVD13_HUMAN;KV113_HUMAN	3	1.88547	1.01885	Zika	QC	NaN	NaN	NaN
Zika / QC	J3KSI6;Q14126	J3KSI6;Q14126	-0.0275097	0.0275097	0.526698	0.179338	52	J3KSI6;Q14126	DSG2	Desmoglein-2	J3KSI6_HUMAN;DSG2_HUMAN	1	-1.88876	0.981112	Zika	QC	NaN	NaN	NaN
Zika / QC	P68363	P68363	-1.00696	1.00696	0.528168	0.17969	22	P68363	TUBA1B	Tubulin alpha-1B chain	TBA1B_HUMAN	8	-50.2406	0.497594	Zika	QC	NaN	NaN	NaN
Zika / QC	P05534;P30447	P05534;P30447	-0.196985	0.196985	0.531478	0.180666	110	P05534;P30447	HLA-A	HLA class I histocompatibility antigen, A-24 alpha chain;HLA class I histocompatibility antigen, A-23 alpha chain	1A24_HUMAN;1A23_HUMAN	9	-12.7628	0.872372	Zika	QC	NaN	NaN	NaN
Zika / QC	Q5T123;Q9H299	Q5T123;Q9H299	-0.559932	0.559932	0.533881	0.181185	80	Q5T123;Q9H299	SH3BGRL3	SH3 domain-binding glutamic acid-rich-like protein 3	Q5T123_HUMAN;SH3L3_HUMAN	2	-32.1666	0.678334	Zika	QC	NaN	NaN	NaN
Zika / QC	A0A087WSY6	A0A087WSY6	0.150281	0.150281	0.535581	0.181463	148	A0A087WSY6	IGKV3D-15	Immunoglobulin kappa variable 3D-15	KVD15_HUMAN	1	10.9786	1.10979	Zika	QC	NaN	NaN	NaN
Zika / QC	P62937	P62937	-0.0385116	0.0385116	0.536988	0.181791	112	P62937	PPIA	Peptidyl-prolyl cis-trans isomerase A	PPIA_HUMAN	10	-2.63411	0.973659	Zika	QC	NaN	NaN	NaN
Zika / QC	P69891;P69892	P69891;P69892	0.189895	0.189895	0.540059	0.18268	100	P69891;P69892	HBG1;HBG2	Hemoglobin subunit gamma-1;Hemoglobin subunit gamma-2	HBG1_HUMAN;HBG2_HUMAN	3	14.0681	1.14068	Zika	QC	NaN	NaN	NaN
Zika / QC	G3XAK1;P26927	G3XAK1;P26927	-0.0538759	0.0538759	0.570369	0.19105	148	G3XAK1;P26927	MST1	Hepatocyte growth factor-like protein	G3XAK1_HUMAN;HGFL_HUMAN	34	-3.66552	0.963345	Zika	QC	NaN	NaN	NaN
Zika / QC	A0A0C4DH42;P01767	A0A0C4DH42;P01767	0.0423127	0.0423127	0.583335	0.194288	80	A0A0C4DH42;P01767	IGHV3-66;IGHV3-53	Immunoglobulin heavy variable 3-66;Immunoglobulin heavy variable 3-53	HV366_HUMAN;HV353_HUMAN	1	2.97633	1.02976	Zika	QC	NaN	NaN	NaN
Zika / QC	P04180	P04180	0.0409843	0.0409843	0.589693	0.195615	148	P04180	LCAT	Phosphatidylcholine-sterol acyltransferase	LCAT_HUMAN	9	2.88155	1.02882	Zika	QC	NaN	NaN	NaN
Zika / QC	P01857	P01857	-0.0259379	0.0259379	0.595162	0.196953	148	P01857	IGHG1	Immunoglobulin heavy constant gamma 1	IGHG1_HUMAN	41	-1.78182	0.982182	Zika	QC	NaN	NaN	NaN
Zika / QC	Q16610	Q16610	0.127103	0.127103	0.599174	0.197646	148	Q16610	ECM1	Extracellular matrix protein 1	ECM1_HUMAN	26	9.20985	1.0921	Zika	QC	NaN	NaN	NaN
Zika / QC	A0A075B6S5	A0A075B6S5	0.119328	0.119328	0.600415	0.197897	122	A0A075B6S5	IGKV1-27	Immunoglobulin kappa variable 1-27	KV127_HUMAN	4	8.62284	1.08623	Zika	QC	NaN	NaN	NaN
Zika / QC	A0A087X0Q4	A0A087X0Q4	0.0848765	0.0848765	0.610453	0.200267	148	A0A087X0Q4	IGKV2-40	Immunoglobulin kappa variable 2-40	A0A087X0Q4_HUMAN	7	6.05969	1.0606	Zika	QC	NaN	NaN	NaN
Zika / QC	P00748	P00748	0.101823	0.101823	0.609776	0.200267	148	P00748	F12	Coagulation factor XII	FA12_HUMAN	32	7.31284	1.07313	Zika	QC	NaN	NaN	NaN
Zika / QC	Q08830	Q08830	0.501515	0.501515	0.610522	0.200267	38	Q08830	FGL1	Fibrinogen-like protein 1	FGL1_HUMAN	10	41.57	1.4157	Zika	QC	NaN	NaN	NaN
Zika / QC	Q15485	Q15485	-0.0723844	0.0723844	0.6125	0.200461	136	Q15485	FCN2	Ficolin-2	FCN2_HUMAN	10	-4.89352	0.951065	Zika	QC	NaN	NaN	NaN
Zika / QC	A0A024R0T9;K7ER74;P02655	A0A024R0T9;K7ER74;P02655	-0.0325833	0.0325833	0.613757	0.200689	146	A0A024R0T9;K7ER74;P02655	APOC4-APOC2;APOC4-APOC2;APOC2	Apolipoprotein C-II isoform 1;APOC4-APOC2 readthrough (NMD candidate);Apolipoprotein C-II	A0A024R0T9_HUMAN;K7ER74_HUMAN;APOC2_HUMAN	7	-2.23319	0.977668	Zika	QC	NaN	NaN	NaN
Zika / QC	Q14520;Q14520-2	Q14520;Q14520-2	-0.0358421	0.0358421	0.656541	0.213324	148	Q14520;Q14520-2	HABP2	Hyaluronan-binding protein 2;Isoform 2 of Hyaluronan-binding protein 2	HABP2_HUMAN	25	-2.45378	0.975462	Zika	QC	NaN	NaN	NaN
Zika / QC	A0A0A0MT36	A0A0A0MT36	0.169531	0.169531	0.659014	0.213959	148	A0A0A0MT36	IGKV6D-21	Immunoglobulin kappa variable 6D-21	KVD21_HUMAN	5	12.4693	1.12469	Zika	QC	NaN	NaN	NaN
Zika / QC	Q14624	Q14624	0.00847105	0.00847105	0.662043	0.214375	148	Q14624	ITIH4	Inter-alpha-trypsin inhibitor heavy chain H4	ITIH4_HUMAN	68	0.588896	1.00589	Zika	QC	NaN	NaN	NaN
Zika / QC	A0A075B6I1	A0A075B6I1	0.104839	0.104839	0.66849	0.215845	138	A0A075B6I1	IGLV4-60	Immunoglobulin lambda variable 4-60	LV460_HUMAN	4	7.53744	1.07537	Zika	QC	NaN	NaN	NaN
Zika / QC	A0A0C4DH36	A0A0C4DH36	0.0234581	0.0234581	0.672425	0.216377	148	A0A0C4DH36	IGHV3-38	Immunoglobulin heavy variable 3-38 (non-functional) (Fragment)	A0A0C4DH36_HUMAN	4	1.63928	1.01639	Zika	QC	NaN	NaN	NaN
Zika / QC	P35443	P35443	-0.0196126	0.0196126	0.674279	0.216377	144	P35443	THBS4	Thrombospondin-4	TSP4_HUMAN	13	-1.35024	0.986498	Zika	QC	NaN	NaN	NaN
Zika / QC	B0YIW2;P02656	B0YIW2;P02656	-0.0152791	0.0152791	0.672942	0.216377	148	B0YIW2;P02656	APOC3	Apolipoprotein C-III	B0YIW2_HUMAN;APOC3_HUMAN	6	-1.05348	0.989465	Zika	QC	NaN	NaN	NaN
Zika / QC	P19320	P19320	-0.0786989	0.0786989	0.688629	0.219764	116	P19320	VCAM1	Vascular cell adhesion protein 1	VCAM1_HUMAN	17	-5.30887	0.946911	Zika	QC	NaN	NaN	NaN
Zika / QC	P08311	P08311	-0.0304953	0.0304953	0.689904	0.22	94	P08311	CTSG	Cathepsin G	CATG_HUMAN	7	-2.09159	0.979084	Zika	QC	NaN	NaN	NaN
Zika / QC	A0A075B7B8	A0A075B7B8	0.287008	0.287008	0.690586	0.220048	148	A0A075B7B8	IGHV3OR16-12	Immunoglobulin heavy variable 3/OR16-12 (non-functional) (Fragment)	A0A075B7B8_HUMAN	2	22.0107	1.22011	Zika	QC	NaN	NaN	NaN
Zika / QC	A0A0C4DH39	A0A0C4DH39	-0.111902	0.111902	0.692796	0.220071	126	A0A0C4DH39	IGHV1-58	Immunoglobulin heavy variable 1-58	HV158_HUMAN	1	-7.46329	0.925367	Zika	QC	NaN	NaN	NaN
Zika / QC	P05019;P05019-2;P05019-3;P05019-4;Q13429	P05019;P05019-2;P05019-3;P05019-4;Q13429	0.321735	0.321735	0.691706	0.220071	50	P05019;P05019-2;P05019-3;P05019-4;Q13429	IGF1	Insulin-like growth factor I;Isoform 2 of Insulin-like growth factor I;Isoform 3 of Insulin-like growth factor I;Isoform 4 of Insulin-like growth factor I;Insulin-like growth factor I (Fragment)	IGF1_HUMAN;IGF1_HUMAN;IGF1_HUMAN;IGF1_HUMAN;Q13429_HUMAN	2	24.9833	1.24983	Zika	QC	NaN	NaN	NaN
Zika / QC	P0DP01	P0DP01	-0.422885	0.422885	0.699326	0.221462	24	P0DP01	IGHV1-8	Immunoglobulin heavy variable 1-8	HV108_HUMAN	2	-25.4068	0.745932	Zika	QC	NaN	NaN	NaN
Zika / QC	B4E1Z4	B4E1Z4	0.0211004	0.0211004	0.711018	0.224475	148	B4E1Z4	NaN	cDNA FLJ55673, highly similar to Complement factor B (EC 3.4.21.47)	B4E1Z4_HUMAN	99	1.47332	1.01473	Zika	QC	NaN	NaN	NaN
Zika / QC	P36955	P36955	0.0186137	0.0186137	0.718453	0.226129	148	P36955	SERPINF1	Pigment epithelium-derived factor	PEDF_HUMAN	34	1.29856	1.01299	Zika	QC	NaN	NaN	NaN
Zika / QC	O15439;O15439-2;O15439-3;O15439-4	O15439;O15439-2;O15439-3;O15439-4	-0.0346668	0.0346668	0.72919	0.228425	118	O15439;O15439-2;O15439-3;O15439-4	ABCC4	Multidrug resistance-associated protein 4;Isoform 2 of Multidrug resistance-associated protein 4;Isoform 3 of Multidrug resistance-associated protein 4;Isoform 4 of Multidrug resistance-associated protein 4	MRP4_HUMAN	1	-2.37428	0.976257	Zika	QC	NaN	NaN	NaN
Zika / QC	P33151	P33151	0.0378097	0.0378097	0.734923	0.229907	148	P33151	CDH5	Cadherin-5	CADH5_HUMAN	16	2.65541	1.02655	Zika	QC	NaN	NaN	NaN
Zika / QC	P10153	P10153	0.991134	0.991134	0.741853	0.231899	18	P10153	RNASE2	Non-secretory ribonuclease	RNAS2_HUMAN	2	98.7746	1.98775	Zika	QC	NaN	NaN	NaN
Zika / QC	Q5VZR0;Q9H4G4	Q5VZR0;Q9H4G4	0.605225	0.605225	0.74894	0.233937	20	Q5VZR0;Q9H4G4	GLIPR2	Golgi-associated plant pathogenesis-related protein 1	Q5VZR0_HUMAN;GAPR1_HUMAN	3	52.1216	1.52122	Zika	QC	NaN	NaN	NaN
Zika / QC	A0A0A0MS09;P01880;P01880-2	A0A0A0MS09;P01880;P01880-2	0.0583807	0.0583807	0.75098	0.234397	130	A0A0A0MS09;P01880;P01880-2	IGHD	Immunoglobulin heavy constant delta (Fragment);Immunoglobulin heavy constant delta;Isoform 2 of Immunoglobulin heavy constant delta	A0A0A0MS09_HUMAN;IGHD_HUMAN;IGHD_HUMAN	17	4.12963	1.0413	Zika	QC	NaN	NaN	NaN
Zika / QC	P01817	P01817	-0.0777383	0.0777383	0.765119	0.238268	138	P01817	IGHV2-5	Immunoglobulin heavy variable 2-5	HV205_HUMAN	7	-5.24581	0.947542	Zika	QC	NaN	NaN	NaN
Zika / QC	P02751-14;P02751-8	P02751-14;P02751-8	0.00077911	0.00077911	0.766155	0.238411	144	P02751-14;P02751-8	FN1	Isoform 14 of Fibronectin;Isoform 8 of Fibronectin	FINC_HUMAN	1	0.0540183	1.00054	Zika	QC	NaN	NaN	NaN
Zika / QC	O60814;P06899;P23527;P33778;P57053;P58876;P62807;Q16778;Q5QNW6;Q5QNW6-2;Q8N257;Q93079;Q99877;Q99879;Q99880;U3KQK0	O60814;P06899;P23527;P33778;P57053;P58876;P62807;Q16778;Q5QNW6;Q5QNW6-2;Q8N257;Q93079;Q99877;Q99879;Q99880;U3KQK0	-0.0460415	0.0460415	0.777573	0.241599	108	O60814;P06899;P23527;P33778;P57053;P58876;P62807;Q16778;Q5QNW6;Q5QNW6-2;Q8N257;Q93079;Q99877;Q99879;Q99880;U3KQK0	HIST1H2BK;HIST1H2BJ;HIST1H2BO;HIST1H2BB;H2BFS;HIST1H2BD;HIST1H2BC;HIST2H2BE;HIST2H2BF;HIST2H2BF;HIST3H2BB;HIST1H2BH;HIST1H2BN;HIST1H2BM;HIST1H2BL;HIST1H2BN	Histone H2B type 1-K;Histone H2B type 1-J;Histone H2B type 1-O;Histone H2B type 1-B;Histone H2B type F-S;Histone H2B type 1-D;Histone H2B type 1-C/E/F/G/I;Histone H2B type 2-E;Histone H2B type 2-F;Isoform 2 of Histone H2B type 2-F;Histone H2B type 3-B;Histone H2B type 1-H;Histone H2B type 1-N;Histone H2B type 1-M;Histone H2B type 1-L;Histone H2B	H2B1K_HUMAN;H2B1J_HUMAN;H2B1O_HUMAN;H2B1B_HUMAN;H2BFS_HUMAN;H2B1D_HUMAN;H2B1C_HUMAN;H2B2E_HUMAN;H2B2F_HUMAN;H2B2F_HUMAN;H2B3B_HUMAN;H2B1H_HUMAN;H2B1N_HUMAN;H2B1M_HUMAN;H2B1L_HUMAN;U3KQK0_HUMAN	4	-3.14097	0.96859	Zika	QC	NaN	NaN	NaN
Zika / QC	P01019	P01019	-0.144695	0.144695	0.781758	0.242533	148	P01019	AGT	Angiotensinogen	ANGT_HUMAN	22	-9.54297	0.90457	Zika	QC	NaN	NaN	NaN
Zika / QC	Q9Y6R7	Q9Y6R7	0.0414082	0.0414082	0.79619	0.246449	148	Q9Y6R7	FCGBP	IgGFc-binding protein	FCGBP_HUMAN	63	2.91179	1.02912	Zika	QC	NaN	NaN	NaN
Zika / QC	A0A0B4J1V2	A0A0B4J1V2	0.0222354	0.0222354	0.799444	0.246905	146	A0A0B4J1V2	IGHV2-26	Immunoglobulin heavy variable 2-26	HV226_HUMAN	8	1.55318	1.01553	Zika	QC	NaN	NaN	NaN
Zika / QC	Q5VVK9;Q5VVL2;Q9NUP7;Q9NUP7-2	Q5VVK9;Q5VVL2;Q9NUP7;Q9NUP7-2	0.378624	0.378624	0.81044	0.24918	30	Q5VVK9;Q5VVL2;Q9NUP7;Q9NUP7-2	TRMT13	tRNA:m(4)X modification enzyme TRM13 homolog;tRNA:m(4)X modification enzyme TRM13 homolog;tRNA:m(4)X modification enzyme TRM13 homolog;Isoform 2 of tRNA:m(4)X modification enzyme TRM13 homolog	Q5VVK9_HUMAN;Q5VVL2_HUMAN;TRM13_HUMAN;TRM13_HUMAN	1	30.0101	1.3001	Zika	QC	NaN	NaN	NaN
Zika / QC	P01861	P01861	0.0264207	0.0264207	0.825123	0.252751	148	P01861	IGHG4	Immunoglobulin heavy constant gamma 4	IGHG4_HUMAN	24	1.84821	1.01848	Zika	QC	NaN	NaN	NaN
Zika / QC	A0A0B4J1V1	A0A0B4J1V1	-0.494297	0.494297	0.83323	0.254478	24	A0A0B4J1V1	IGHV3-21	Immunoglobulin heavy variable 3-21	HV321_HUMAN	1	-29.0092	0.709908	Zika	QC	NaN	NaN	NaN
Zika / QC	A0A0B4J2H0	A0A0B4J2H0	0.189249	0.189249	0.837622	0.255441	148	A0A0B4J2H0	IGHV1-69D	Immunoglobulin heavy variable 1-69D	HV69D_HUMAN	5	14.017	1.14017	Zika	QC	NaN	NaN	NaN
Zika / QC	P01709	P01709	0.0419018	0.0419018	0.846055	0.257359	148	P01709	IGLV2-8	Immunoglobulin lambda variable 2-8	LV208_HUMAN	2	2.947	1.02947	Zika	QC	NaN	NaN	NaN
Zika / QC	P01042-2	P01042-2	0.0890561	0.0890561	0.849278	0.25766	148	P01042-2	KNG1	Isoform LMW of Kininogen-1	KNG1_HUMAN	6	6.3674	1.06367	Zika	QC	NaN	NaN	NaN
Zika / QC	P01619	P01619	0.0459543	0.0459543	0.849024	0.25766	148	P01619	IGKV3-20	Immunoglobulin kappa variable 3-20	KV320_HUMAN	6	3.23658	1.03237	Zika	QC	NaN	NaN	NaN
Zika / QC	P01700	P01700	-0.0312337	0.0312337	0.850137	0.257731	148	P01700	IGLV1-47	Immunoglobulin lambda variable 1-47	LV147_HUMAN	2	-2.14169	0.978583	Zika	QC	NaN	NaN	NaN
Zika / QC	P01008	P01008	-0.00850408	0.00850408	0.881895	0.265212	148	P01008	SERPINC1	Antithrombin-III	ANT3_HUMAN	47	-0.587724	0.994123	Zika	QC	NaN	NaN	NaN
Zika / QC	Q92496;Q92496-2	Q92496;Q92496-2	-0.0052315	0.0052315	0.895992	0.268472	148	Q92496;Q92496-2	CFHR4	Complement factor H-related protein 4;Isoform 2 of Complement factor H-related protein 4	FHR4_HUMAN	12	-0.361963	0.99638	Zika	QC	NaN	NaN	NaN
Zika / QC	A0A0B4J1V6	A0A0B4J1V6	-0.00106561	0.00106561	0.895586	0.268472	134	A0A0B4J1V6	IGHV3-73	Immunoglobulin heavy variable 3-73	HV373_HUMAN	4	-0.0738349	0.999262	Zika	QC	NaN	NaN	NaN
Zika / QC	P27918	P27918	-0.0273551	0.0273551	0.924657	0.275414	148	P27918	CFP	Properdin	PROP_HUMAN	16	-1.87825	0.981218	Zika	QC	NaN	NaN	NaN
Zika / QC	A0A0C4DH30	A0A0C4DH30	0.056995	0.056995	0.951621	0.281658	70	A0A0C4DH30	IGHV3-16	Immunoglobulin heavy variable 3-16 (non-functional) (Fragment)	A0A0C4DH30_HUMAN	1	4.02966	1.0403	Zika	QC	NaN	NaN	NaN
Zika / QC	A0A1W2PP64	A0A1W2PP64	-0.23734	0.23734	0.953208	0.281723	148	A0A1W2PP64	NaN	Uncharacterized protein	A0A1W2PP64_HUMAN	1	-15.1692	0.848308	Zika	QC	NaN	NaN	NaN
Zika / QC	P06702	P06702	-0.0796308	0.0796308	0.960675	0.283726	114	P06702	S100A9	Protein S100-A9	S10A9_HUMAN	9	-5.37002	0.9463	Zika	QC	NaN	NaN	NaN
Zika / QC	P31146	P31146	0.888036	0.888036	0.974575	0.287008	38	P31146	CORO1A	Coronin-1A	COR1A_HUMAN	12	85.0655	1.85066	Zika	QC	NaN	NaN	NaN
Zika / QC	P14780	P14780	0.000973299	0.000973299	0.99673	0.292072	104	P14780	MMP9	Matrix metalloproteinase-9	MMP9_HUMAN	14	0.0674867	1.00067	Zika	QC	NaN	NaN	NaN

## Sheet: Sheet1
Comparison (group1/group2)	Group	ProteinGroups	AVG Log2 Ratio	Absolute AVG Log2 Ratio	Pvalue	Qvalue	# of Ratios	UniProtIds	Genes	ProteinDescriptions	ProteinNames	# Unique Total Peptides	% Change	Ratio	Condition Numerator	Condition Denominator	GO Cellular Component	GO Molecular Function	GO Biological Process
Zika / Dengue	P02675	P02675	-6.19643	6.19643	8.70345e-35	3.58582e-32	208	P02675	FGB	Fibrinogen beta chain	FIBB_HUMAN	53	-98.6364	0.013636	Zika	Dengue	NaN	NaN	NaN
Zika / Dengue	P02679;P02679-2	P02679;P02679-2	-6.26132	6.26132	4.08889e-33	8.42312e-31	204	P02679;P02679-2	FGG	Fibrinogen gamma chain;Isoform Gamma-A of Fibrinogen gamma chain	FIBG_HUMAN	48	-98.6964	0.0130363	Zika	Dengue	NaN	NaN	NaN
Zika / Dengue	P10720	P10720	0.972247	0.972247	2.29895e-17	5.26205e-16	230	P10720	PF4V1	Platelet factor 4 variant	PF4V_HUMAN	7	96.1894	1.96189	Zika	Dengue	NaN	NaN	NaN
Zika / Dengue	P02775	P02775	0.721728	0.721728	2.76224e-17	5.98969e-16	244	P02775	PPBP	Platelet basic protein	CXCL7_HUMAN	7	64.9157	1.64916	Zika	Dengue	NaN	NaN	NaN
Zika / Dengue	A0A075B6S2;A2NJV5	A0A075B6S2;A2NJV5	-0.87815	0.87815	1.0001e-14	1.64816e-13	206	A0A075B6S2;A2NJV5	IGKV2D-29;IGKV2-29	Immunoglobulin kappa variable 2D-29;Immunoglobulin kappa variable 2-29	KVD29_HUMAN;KV229_HUMAN	3	-45.5935	0.544065	Zika	Dengue	NaN	NaN	NaN
Zika / Dengue	P10643	P10643	-0.603824	0.603824	1.53495e-14	2.34222e-13	244	P10643	C7	Complement component C7	CO7_HUMAN	53	-34.1993	0.658007	Zika	Dengue	NaN	NaN	NaN
Zika / Dengue	P02671	P02671	-2.14754	2.14754	1.66835e-14	2.37738e-13	244	P02671	FGA	Fibrinogen alpha chain	FIBA_HUMAN	73	-77.4303	0.225697	Zika	Dengue	NaN	NaN	NaN
Zika / Dengue	P23142	P23142	-0.556636	0.556636	2.71058e-14	3.60245e-13	244	P23142	FBLN1	Fibulin-1	FBLN1_HUMAN	30	-32.0114	0.679886	Zika	Dengue	NaN	NaN	NaN
Zika / Dengue	P02647	P02647	0.446186	0.446186	5.07002e-12	4.85779e-11	244	P02647	APOA1	Apolipoprotein A-I	APOA1_HUMAN	52	36.2433	1.36243	Zika	Dengue	NaN	NaN	NaN
Zika / Dengue	P04003	P04003	-0.273775	0.273775	4.41777e-11	3.55473e-10	244	P04003	C4BPA	C4b-binding protein alpha chain	C4BPA_HUMAN	49	-17.2848	0.827152	Zika	Dengue	NaN	NaN	NaN
Zika / Dengue	P02768	P02768	0.33179	0.33179	9.96504e-11	7.07862e-10	244	P02768	ALB	Serum albumin	ALBU_HUMAN	148	25.8574	1.25857	Zika	Dengue	NaN	NaN	NaN
Zika / Dengue	Q9UEU0;Q9UEU0-2	Q9UEU0;Q9UEU0-2	-0.572825	0.572825	1.05494e-10	7.3667e-10	158	Q9UEU0;Q9UEU0-2	VTI1B	Vesicle transport through interaction with t-SNAREs homolog 1B;Isoform Short of Vesicle transport through interaction with t-SNAREs homolog 1B	VTI1B_HUMAN	1	-32.7701	0.672299	Zika	Dengue	NaN	NaN	NaN
Zika / Dengue	P07358	P07358	-0.310085	0.310085	5.78414e-10	3.50451e-09	244	P07358	C8B	Complement component C8 beta chain	CO8B_HUMAN	44	-19.3406	0.806594	Zika	Dengue	NaN	NaN	NaN
Zika / Dengue	P0DJI8	P0DJI8	-1.04392	1.04392	1.68827e-09	9.27423e-09	242	P0DJI8	SAA1	Serum amyloid A-1 protein	SAA1_HUMAN	14	-51.4992	0.485008	Zika	Dengue	NaN	NaN	NaN
Zika / Dengue	P04275	P04275	-0.692864	0.692864	2.12697e-09	1.15304e-08	240	P04275	VWF	von Willebrand factor	VWF_HUMAN	110	-38.1375	0.618625	Zika	Dengue	NaN	NaN	NaN
Zika / Dengue	Q6EMK4	Q6EMK4	-0.262574	0.262574	7.87834e-09	3.60653e-08	220	Q6EMK4	VASN	Vasorin	VASN_HUMAN	10	-16.6401	0.833599	Zika	Dengue	NaN	NaN	NaN
Zika / Dengue	P06727	P06727	0.552702	0.552702	9.87651e-09	4.32885e-08	244	P06727	APOA4	Apolipoprotein A-IV	APOA4_HUMAN	51	46.683	1.46683	Zika	Dengue	NaN	NaN	NaN
Zika / Dengue	I3L145;P04278	I3L145;P04278	-0.693549	0.693549	1.20132e-08	5.20993e-08	242	I3L145;P04278	SHBG	Sex hormone-binding globulin	I3L145_HUMAN;SHBG_HUMAN	23	-38.1669	0.618331	Zika	Dengue	NaN	NaN	NaN
Zika / Dengue	P02741	P02741	-1.09702	1.09702	2.1652e-08	8.75341e-08	210	P02741	CRP	C-reactive protein	CRP_HUMAN	10	-53.2518	0.467482	Zika	Dengue	NaN	NaN	NaN
Zika / Dengue	P01023	P01023	-0.261861	0.261861	3.62985e-08	1.3473e-07	244	P01023	A2M	Alpha-2-macroglobulin	A2MG_HUMAN	162	-16.5988	0.834012	Zika	Dengue	NaN	NaN	NaN
Zika / Dengue	Q16610	Q16610	-0.368265	0.368265	4.35169e-08	1.6008e-07	244	Q16610	ECM1	Extracellular matrix protein 1	ECM1_HUMAN	26	-22.5286	0.774714	Zika	Dengue	NaN	NaN	NaN
Zika / Dengue	A0A075B7D8	A0A075B7D8	-2.03517	2.03517	6.47094e-08	2.31829e-07	244	A0A075B7D8	IGHV3OR15-7	Immunoglobulin heavy variable 3/OR15-7 (pseudogene) (Fragment)	A0A075B7D8_HUMAN	3	-75.6021	0.243979	Zika	Dengue	NaN	NaN	NaN
Zika / Dengue	P00450	P00450	-0.175658	0.175658	7.44313e-08	2.6436e-07	244	P00450	CP	Ceruloplasmin	CERU_HUMAN	95	-11.4636	0.885364	Zika	Dengue	NaN	NaN	NaN
Zika / Dengue	Q14520;Q14520-2	Q14520;Q14520-2	-0.372445	0.372445	1.96925e-07	6.30281e-07	244	Q14520;Q14520-2	HABP2	Hyaluronan-binding protein 2;Isoform 2 of Hyaluronan-binding protein 2	HABP2_HUMAN	25	-22.7528	0.772472	Zika	Dengue	NaN	NaN	NaN
Zika / Dengue	A0A0C4DH31	A0A0C4DH31	-0.555654	0.555654	1.97345e-07	6.30281e-07	244	A0A0C4DH31	IGHV1-18	Immunoglobulin heavy variable 1-18	HV118_HUMAN	4	-31.9652	0.680348	Zika	Dengue	NaN	NaN	NaN
Zika / Dengue	H0YAC1;P03952	H0YAC1;P03952	0.230455	0.230455	2.25289e-07	6.78891e-07	244	H0YAC1;P03952	KLKB1	Plasma kallikrein (Fragment);Plasma kallikrein	H0YAC1_HUMAN;KLKB1_HUMAN	38	17.3205	1.1732	Zika	Dengue	NaN	NaN	NaN
Zika / Dengue	P68871	P68871	1.74682	1.74682	2.21844e-07	6.78891e-07	244	P68871	HBB	Hemoglobin subunit beta	HBB_HUMAN	23	235.618	3.35618	Zika	Dengue	NaN	NaN	NaN
Zika / Dengue	P06312	P06312	0.643941	0.643941	2.30613e-07	6.83543e-07	244	P06312	IGKV4-1	Immunoglobulin kappa variable 4-1	KV401_HUMAN	7	56.2592	1.56259	Zika	Dengue	NaN	NaN	NaN
Zika / Dengue	Q14624	Q14624	0.213437	0.213437	2.35108e-07	6.9189e-07	244	Q14624	ITIH4	Inter-alpha-trypsin inhibitor heavy chain H4	ITIH4_HUMAN	68	15.9447	1.15945	Zika	Dengue	NaN	NaN	NaN
Zika / Dengue	C9JB55	C9JB55	0.268854	0.268854	2.62918e-07	7.62832e-07	226	C9JB55	TF	Serotransferrin (Fragment)	C9JB55_HUMAN	2	20.485	1.20485	Zika	Dengue	NaN	NaN	NaN
Zika / Dengue	P10809	P10809	-1.06473	1.06473	3.70113e-07	1.0234e-06	48	P10809	HSPD1	60 kDa heat shock protein, mitochondrial	CH60_HUMAN	4	-52.1938	0.478062	Zika	Dengue	NaN	NaN	NaN
Zika / Dengue	A0A0B4J1U7	A0A0B4J1U7	0.671278	0.671278	4.37246e-07	1.16978e-06	244	A0A0B4J1U7	IGHV6-1	Immunoglobulin heavy variable 6-1	HV601_HUMAN	9	59.2483	1.59248	Zika	Dengue	NaN	NaN	NaN
Zika / Dengue	P07998	P07998	-1.35604	1.35604	4.92083e-07	1.29133e-06	98	P07998	RNASE1	Ribonuclease pancreatic	RNAS1_HUMAN	3	-60.9347	0.390653	Zika	Dengue	NaN	NaN	NaN
Zika / Dengue	A0A0G2JMY9;Q8N6C8;Q8N6C8-3	A0A0G2JMY9;Q8N6C8;Q8N6C8-3	-0.431779	0.431779	6.11003e-07	1.55391e-06	98	A0A0G2JMY9;Q8N6C8;Q8N6C8-3	LILRA3	Leukocyte immunoglobulin-like receptor subfamily A member 3;Leukocyte immunoglobulin-like receptor subfamily A member 3;Isoform 3 of Leukocyte immunoglobulin-like receptor subfamily A member 3	A0A0G2JMY9_HUMAN;LIRA3_HUMAN;LIRA3_HUMAN	6	-25.8653	0.741347	Zika	Dengue	NaN	NaN	NaN
Zika / Dengue	Q12805;Q12805-2;Q12805-4	Q12805;Q12805-2;Q12805-4	-0.457853	0.457853	7.16414e-07	1.79977e-06	244	Q12805;Q12805-2;Q12805-4	EFEMP1	EGF-containing fibulin-like extracellular matrix protein 1;Isoform 2 of EGF-containing fibulin-like extracellular matrix protein 1;Isoform 4 of EGF-containing fibulin-like extracellular matrix protein 1	FBLN3_HUMAN	19	-27.1931	0.728069	Zika	Dengue	NaN	NaN	NaN
Zika / Dengue	P22792	P22792	-0.254477	0.254477	7.55745e-07	1.86447e-06	244	P22792	CPN2	Carboxypeptidase N subunit 2	CPN2_HUMAN	16	-16.1709	0.838291	Zika	Dengue	NaN	NaN	NaN
Zika / Dengue	O75636	O75636	0.335478	0.335478	8.43024e-07	2.05518e-06	244	O75636	FCN3	Ficolin-3	FCN3_HUMAN	13	26.1796	1.2618	Zika	Dengue	NaN	NaN	NaN
Zika / Dengue	P80748	P80748	-0.473455	0.473455	8.57499e-07	2.07817e-06	236	P80748	IGLV3-21	Immunoglobulin lambda variable 3-21	LV321_HUMAN	3	-27.9762	0.720238	Zika	Dengue	NaN	NaN	NaN
Zika / Dengue	H0Y2P0;H0Y5E4;H0YCV9;H0YDW7;H0YDX6;P16070;P16070-10;P16070-11;P16070-12;P16070-13;P16070-14;P16070-15;P16070-16;P16070-17;P16070-18;P16070-3;P16070-4;P16070-5;P16070-6;P16070-7;P16070-8;P16070-9	H0Y2P0;H0Y5E4;H0YCV9;H0YDW7;H0YDX6;P16070;P16070-10;P16070-11;P16070-12;P16070-13;P16070-14;P16070-15;P16070-16;P16070-17;P16070-18;P16070-3;P16070-4;P16070-5;P16070-6;P16070-7;P16070-8;P16070-9	-0.298364	0.298364	8.63244e-07	2.07986e-06	226	H0Y2P0;H0Y5E4;H0YCV9;H0YDW7;H0YDX6;P16070;P16070-10;P16070-11;P16070-12;P16070-13;P16070-14;P16070-15;P16070-16;P16070-17;P16070-18;P16070-3;P16070-4;P16070-5;P16070-6;P16070-7;P16070-8;P16070-9	CD44	CD44 antigen (Fragment);CD44 antigen (Fragment);CD44 antigen (Fragment);CD44 antigen (Fragment);CD44 antigen (Fragment);CD44 antigen;Isoform 10 of CD44 antigen;Isoform 11 of CD44 antigen;Isoform 12 of CD44 antigen;Isoform 13 of CD44 antigen;Isoform 14 of CD44 antigen;Isoform 15 of CD44 antigen;Isoform 16 of CD44 antigen;Isoform 17 of CD44 antigen;Isoform 18 of CD44 antigen;Isoform 3 of CD44 antig…	H0Y2P0_HUMAN;H0Y5E4_HUMAN;H0YCV9_HUMAN;H0YDW7_HUMAN;H0YDX6_HUMAN;CD44_HUMAN;CD44_HUMAN;CD44_HUMAN;CD44_HUMAN;CD44_HUMAN;CD44_HUMAN;CD44_HUMAN;CD44_HUMAN;CD44_HUMAN;CD44_HUMAN;CD44_HUMAN;CD44_HUMAN;CD44_HUMAN;CD44_HUMAN;CD44_HUMAN;CD44_HUMAN;CD44_HUMAN	4	-18.6826	0.813174	Zika	Dengue	NaN	NaN	NaN
Zika / Dengue	P02787	P02787	0.214172	0.214172	9.28134e-07	2.2232e-06	244	P02787	TF	Serotransferrin	TRFE_HUMAN	116	16.0038	1.16004	Zika	Dengue	NaN	NaN	NaN
Zika / Dengue	P02042	P02042	1.65935	1.65935	1.59702e-06	3.61523e-06	216	P02042	HBD	Hemoglobin subunit delta	HBD_HUMAN	4	215.873	3.15873	Zika	Dengue	NaN	NaN	NaN
Zika / Dengue	P69905	P69905	1.46579	1.46579	1.67904e-06	3.73598e-06	244	P69905	HBA1	Hemoglobin subunit alpha	HBA_HUMAN	23	176.214	2.76214	Zika	Dengue	NaN	NaN	NaN
Zika / Dengue	P01705	P01705	-0.552645	0.552645	1.6957e-06	3.73598e-06	196	P01705	IGLV2-23	Immunoglobulin lambda variable 2-23	LV223_HUMAN	2	-31.8231	0.681769	Zika	Dengue	NaN	NaN	NaN
Zika / Dengue	P0DOY3	P0DOY3	-0.927417	0.927417	1.7917e-06	3.86482e-06	180	P0DOY3	IGLC3	Immunoglobulin lambda constant 3	IGLC3_HUMAN	3	-47.4201	0.525799	Zika	Dengue	NaN	NaN	NaN
Zika / Dengue	P36980;P36980-2	P36980;P36980-2	-0.32973	0.32973	1.77692e-06	3.86482e-06	244	P36980;P36980-2	CFHR2	Complement factor H-related protein 2;Isoform Short of Complement factor H-related protein 2	FHR2_HUMAN	5	-20.4314	0.795686	Zika	Dengue	NaN	NaN	NaN
Zika / Dengue	P02766	P02766	0.454161	0.454161	2.31522e-06	4.81752e-06	244	P02766	TTR	Transthyretin	TTHY_HUMAN	16	36.9985	1.36999	Zika	Dengue	NaN	NaN	NaN
Zika / Dengue	P08571	P08571	-0.293366	0.293366	2.43863e-06	4.99858e-06	242	P08571	CD14	Monocyte differentiation antigen CD14	CD14_HUMAN	10	-18.4004	0.815996	Zika	Dengue	NaN	NaN	NaN
Zika / Dengue	P27105	P27105	3.05918	3.05918	2.67416e-06	5.42735e-06	38	P27105	STOM	Erythrocyte band 7 integral membrane protein	STOM_HUMAN	4	733.497	8.33497	Zika	Dengue	NaN	NaN	NaN
Zika / Dengue	P00740	P00740	0.323552	0.323552	3.2282e-06	6.48246e-06	244	P00740	F9	Coagulation factor IX	FA9_HUMAN	18	25.1408	1.25141	Zika	Dengue	NaN	NaN	NaN
Zika / Dengue	A0A024R0T9;K7ER74;P02655	A0A024R0T9;K7ER74;P02655	0.543575	0.543575	4.27874e-06	8.3547e-06	230	A0A024R0T9;K7ER74;P02655	APOC4-APOC2;APOC4-APOC2;APOC2	Apolipoprotein C-II isoform 1;APOC4-APOC2 readthrough (NMD candidate);Apolipoprotein C-II	A0A024R0T9_HUMAN;K7ER74_HUMAN;APOC2_HUMAN	7	45.758	1.45758	Zika	Dengue	NaN	NaN	NaN
Zika / Dengue	P05546	P05546	0.20806	0.20806	4.67464e-06	9.04204e-06	244	P05546	SERPIND1	Heparin cofactor 2	HEP2_HUMAN	30	15.5134	1.15513	Zika	Dengue	NaN	NaN	NaN
Zika / Dengue	P04004	P04004	-0.254438	0.254438	4.87191e-06	9.33594e-06	244	P04004	VTN	Vitronectin	VTNC_HUMAN	28	-16.1686	0.838314	Zika	Dengue	NaN	NaN	NaN
Zika / Dengue	P41222	P41222	-0.471677	0.471677	5.83021e-06	1.10186e-05	194	P41222	PTGDS	Prostaglandin-H2 D-isomerase	PTGDS_HUMAN	5	-27.8874	0.721126	Zika	Dengue	NaN	NaN	NaN
Zika / Dengue	G3V0E5;P02786	G3V0E5;P02786	-0.301273	0.301273	6.91573e-06	1.26635e-05	232	G3V0E5;P02786	TFRC	Transferrin receptor (P90, CD71), isoform CRA_c;Transferrin receptor protein 1	G3V0E5_HUMAN;TFR1_HUMAN	12	-18.8464	0.811536	Zika	Dengue	NaN	NaN	NaN
Zika / Dengue	P30043	P30043	1.67803	1.67803	7.10234e-06	1.28906e-05	62	P30043	BLVRB	Flavin reductase (NADPH)	BLVRB_HUMAN	8	219.992	3.19992	Zika	Dengue	NaN	NaN	NaN
Zika / Dengue	E9PJ29;Q86UD1	E9PJ29;Q86UD1	-0.780827	0.780827	7.19822e-06	1.30073e-05	110	E9PJ29;Q86UD1	OAF	Out at first protein homolog	E9PJ29_HUMAN;OAF_HUMAN	5	-41.7967	0.582033	Zika	Dengue	NaN	NaN	NaN
Zika / Dengue	A0A0C4DH68	A0A0C4DH68	0.366434	0.366434	7.62771e-06	1.37232e-05	244	A0A0C4DH68	IGKV2-24	Immunoglobulin kappa variable 2-24	KV224_HUMAN	8	28.9163	1.28916	Zika	Dengue	NaN	NaN	NaN
Zika / Dengue	P18065	P18065	-0.693832	0.693832	7.88882e-06	1.40095e-05	92	P18065	IGFBP2	Insulin-like growth factor-binding protein 2	IBP2_HUMAN	12	-38.179	0.61821	Zika	Dengue	NaN	NaN	NaN
Zika / Dengue	P26038	P26038	-1.30883	1.30883	8.62022e-06	1.51775e-05	74	P26038	MSN	Moesin	MOES_HUMAN	13	-59.6352	0.403648	Zika	Dengue	NaN	NaN	NaN
Zika / Dengue	P04196	P04196	0.29361	0.29361	9.78865e-06	1.69451e-05	244	P04196	HRG	Histidine-rich glycoprotein	HRG_HUMAN	29	22.5703	1.2257	Zika	Dengue	NaN	NaN	NaN
Zika / Dengue	P36222	P36222	-2.20117	2.20117	1.09166e-05	1.86625e-05	30	P36222	CHI3L1	Chitinase-3-like protein 1	CH3L1_HUMAN	4	-78.2539	0.217461	Zika	Dengue	NaN	NaN	NaN
Zika / Dengue	P01034	P01034	-0.158252	0.158252	1.21602e-05	2.05557e-05	244	P01034	CST3	Cystatin-C	CYTC_HUMAN	9	-10.389	0.89611	Zika	Dengue	NaN	NaN	NaN
Zika / Dengue	A0A1W2PQB1;H0Y755;M9MML0;P08637	A0A1W2PQB1;H0Y755;M9MML0;P08637	-0.338791	0.338791	1.25155e-05	2.09609e-05	240	A0A1W2PQB1;H0Y755;M9MML0;P08637	FCGR3A	Fc of IgG low affinity IIIa receptor isoform 1;Low affinity immunoglobulin gamma Fc region receptor III-A (Fragment);Low affinity immunoglobulin gamma Fc region receptor III-A;Low affinity immunoglobulin gamma Fc region receptor III-A	A0A1W2PQB1_HUMAN;H0Y755_HUMAN;M9MML0_HUMAN;FCG3A_HUMAN	7	-20.9296	0.790704	Zika	Dengue	NaN	NaN	NaN
Zika / Dengue	Q15582	Q15582	-0.361043	0.361043	1.29774e-05	2.15592e-05	228	Q15582	TGFBI	Transforming growth factor-beta-induced protein ig-h3	BGH3_HUMAN	27	-22.1399	0.778601	Zika	Dengue	NaN	NaN	NaN
Zika / Dengue	P11226	P11226	-0.572912	0.572912	1.31256e-05	2.17179e-05	120	P11226	MBL2	Mannose-binding protein C	MBL2_HUMAN	6	-32.7741	0.672259	Zika	Dengue	NaN	NaN	NaN
Zika / Dengue	B5MDF5;J3KQE5;P62826	B5MDF5;J3KQE5;P62826	0.337024	0.337024	1.49664e-05	2.42761e-05	68	B5MDF5;J3KQE5;P62826	RAN	GTP-binding nuclear protein Ran;GTP-binding nuclear protein Ran (Fragment);GTP-binding nuclear protein Ran	B5MDF5_HUMAN;J3KQE5_HUMAN;RAN_HUMAN	3	26.3149	1.26315	Zika	Dengue	NaN	NaN	NaN
Zika / Dengue	P00918	P00918	1.19875	1.19875	1.67366e-05	2.7041e-05	166	P00918	CA2	Carbonic anhydrase 2	CAH2_HUMAN	9	129.541	2.29541	Zika	Dengue	NaN	NaN	NaN
Zika / Dengue	E7EPG1;Q13201	E7EPG1;Q13201	0.395998	0.395998	1.8156e-05	2.92199e-05	132	E7EPG1;Q13201	MMRN1	Multimerin-1	E7EPG1_HUMAN;MMRN1_HUMAN	4	31.5853	1.31585	Zika	Dengue	NaN	NaN	NaN
Zika / Dengue	P0DOY2	P0DOY2	0.256241	0.256241	2.67867e-05	4.18034e-05	244	P0DOY2	IGLC2	Immunoglobulin lambda constant 2	IGLC2_HUMAN	20	19.4362	1.19436	Zika	Dengue	NaN	NaN	NaN
Zika / Dengue	P01042	P01042	0.15398	0.15398	3.24992e-05	5.03371e-05	244	P01042	KNG1	Kininogen-1	KNG1_HUMAN	47	11.2635	1.11263	Zika	Dengue	NaN	NaN	NaN
Zika / Dengue	A0A087X0I0;A0A140T8Y3;A0A140T8Z8;A0A140T9C0;A0A140T9L7;A0A140TA41;A0A140TA52;P22105;P22105-3;P22105-4	A0A087X0I0;A0A140T8Y3;A0A140T8Z8;A0A140T9C0;A0A140T9L7;A0A140TA41;A0A140TA52;P22105;P22105-3;P22105-4	-0.618314	0.618314	4.00076e-05	6.05998e-05	176	A0A087X0I0;A0A140T8Y3;A0A140T8Z8;A0A140T9C0;A0A140T9L7;A0A140TA41;A0A140TA52;P22105;P22105-3;P22105-4	TNXB	Tenascin-X;Tenascin-X;Tenascin-X (Fragment);Tenascin-X;Tenascin-X (Fragment);Tenascin-X;Tenascin-X;Tenascin-X;Isoform 4 of Tenascin-X;Isoform 5 of Tenascin-X	A0A087X0I0_HUMAN;A0A140T8Y3_HUMAN;A0A140T8Z8_HUMAN;A0A140T9C0_HUMAN;A0A140T9L7_HUMAN;A0A140TA41_HUMAN;A0A140TA52_HUMAN;TENX_HUMAN;TENX_HUMAN;TENX_HUMAN	18	-34.8568	0.651432	Zika	Dengue	NaN	NaN	NaN
Zika / Dengue	H0Y2Y8;Q15942	H0Y2Y8;Q15942	-0.320716	0.320716	4.04004e-05	6.09706e-05	60	H0Y2Y8;Q15942	ZYX	Zyxin (Fragment);Zyxin	H0Y2Y8_HUMAN;ZYX_HUMAN	3	-19.9328	0.800672	Zika	Dengue	NaN	NaN	NaN
Zika / Dengue	P20851;P20851-2	P20851;P20851-2	-0.241559	0.241559	4.23993e-05	6.37537e-05	244	P20851;P20851-2	C4BPB	C4b-binding protein beta chain;Isoform 2 of C4b-binding protein beta chain	C4BPB_HUMAN	11	-15.4169	0.845831	Zika	Dengue	NaN	NaN	NaN
Zika / Dengue	A0A0C4DH32	A0A0C4DH32	-0.566534	0.566534	4.40711e-05	6.60265e-05	108	A0A0C4DH32	IGHV3-20	Immunoglobulin heavy variable 3-20	HV320_HUMAN	2	-32.4763	0.675237	Zika	Dengue	NaN	NaN	NaN
Zika / Dengue	P61626	P61626	-0.313292	0.313292	5.03705e-05	7.35909e-05	240	P61626	LYZ	Lysozyme C	LYSC_HUMAN	11	-19.5197	0.804803	Zika	Dengue	NaN	NaN	NaN
Zika / Dengue	P19827	P19827	0.173315	0.173315	5.11903e-05	7.42211e-05	244	P19827	ITIH1	Inter-alpha-trypsin inhibitor heavy chain H1	ITIH1_HUMAN	53	12.7647	1.12765	Zika	Dengue	NaN	NaN	NaN
Zika / Dengue	P27169	P27169	0.163579	0.163579	5.16355e-05	7.42211e-05	244	P27169	PON1	Serum paraoxonase/arylesterase 1	PON1_HUMAN	20	12.0063	1.12006	Zika	Dengue	NaN	NaN	NaN
Zika / Dengue	P02745	P02745	-0.18985	0.18985	5.69591e-05	8.0367e-05	244	P02745	C1QA	Complement C1q subcomponent subunit A	C1QA_HUMAN	9	-12.3303	0.876697	Zika	Dengue	NaN	NaN	NaN
Zika / Dengue	P09172	P09172	-0.832093	0.832093	7.20239e-05	9.95767e-05	146	P09172	DBH	Dopamine beta-hydroxylase	DOPO_HUMAN	10	-43.8286	0.561714	Zika	Dengue	NaN	NaN	NaN
Zika / Dengue	P00491	P00491	2.5314	2.5314	8.81659e-05	0.000119488	12	P00491	PNP	Purine nucleoside phosphorylase	PNPH_HUMAN	3	478.133	5.78133	Zika	Dengue	NaN	NaN	NaN
Zika / Dengue	A0A182DWH7;P49908	A0A182DWH7;P49908	0.221392	0.221392	8.87154e-05	0.000119838	244	A0A182DWH7;P49908	SELENOP	Selenoprotein P (Fragment);Selenoprotein P	A0A182DWH7_HUMAN;SEPP1_HUMAN	9	16.5858	1.16586	Zika	Dengue	NaN	NaN	NaN
Zika / Dengue	P35858;P35858-2	P35858;P35858-2	0.32004	0.32004	9.14262e-05	0.000123097	240	P35858;P35858-2	IGFALS	Insulin-like growth factor-binding protein complex acid labile subunit;Isoform 2 of Insulin-like growth factor-binding protein complex acid labile subunit	ALS_HUMAN	28	24.8365	1.24837	Zika	Dengue	NaN	NaN	NaN
Zika / Dengue	P19320	P19320	-0.578326	0.578326	0.000102303	0.000136404	194	P19320	VCAM1	Vascular cell adhesion protein 1	VCAM1_HUMAN	17	-33.0259	0.669741	Zika	Dengue	NaN	NaN	NaN
Zika / Dengue	P48740-2	P48740-2	-0.53653	0.53653	0.000122867	0.000160194	144	P48740-2	MASP1	Isoform 2 of Mannan-binding lectin serine protease 1	MASP1_HUMAN	9	-31.0573	0.689427	Zika	Dengue	NaN	NaN	NaN
Zika / Dengue	P00488	P00488	-0.44629	0.44629	0.000127569	0.00016476	174	P00488	F13A1	Coagulation factor XIII A chain	F13A_HUMAN	22	-26.6072	0.733928	Zika	Dengue	NaN	NaN	NaN
Zika / Dengue	P10909;P10909-2;P10909-4;P10909-5	P10909;P10909-2;P10909-4;P10909-5	0.202162	0.202162	0.000133622	0.00017062	244	P10909;P10909-2;P10909-4;P10909-5	CLU	Clusterin;Isoform 2 of Clusterin;Isoform 4 of Clusterin;Isoform 5 of Clusterin	CLUS_HUMAN	38	15.0421	1.15042	Zika	Dengue	NaN	NaN	NaN
Zika / Dengue	P05164;P05164-2;P05164-3	P05164;P05164-2;P05164-3	-0.470097	0.470097	0.00013599	0.000172925	146	P05164;P05164-2;P05164-3	MPO	Myeloperoxidase;Isoform H14 of Myeloperoxidase;Isoform H7 of Myeloperoxidase	PERM_HUMAN	19	-27.8084	0.721916	Zika	Dengue	NaN	NaN	NaN
Zika / Dengue	P05160	P05160	-0.180607	0.180607	0.000139859	0.000176214	244	P05160	F13B	Coagulation factor XIII B chain	F13B_HUMAN	47	-11.7669	0.882331	Zika	Dengue	NaN	NaN	NaN
Zika / Dengue	P43121	P43121	-0.373627	0.373627	0.00015064	0.000187757	160	P43121	MCAM	Cell surface glycoprotein MUC18	MUC18_HUMAN	8	-22.816	0.77184	Zika	Dengue	NaN	NaN	NaN
Zika / Dengue	P22692;P22692-2	P22692;P22692-2	-1.25766	1.25766	0.000153646	0.000189528	66	P22692;P22692-2	IGFBP4	Insulin-like growth factor-binding protein 4;Isoform 2 of Insulin-like growth factor-binding protein 4	IBP4_HUMAN	4	-58.1779	0.418221	Zika	Dengue	NaN	NaN	NaN
Zika / Dengue	P51884	P51884	-0.460625	0.460625	0.00016597	0.000203511	244	P51884	LUM	Lumican	LUM_HUMAN	21	-27.3329	0.726671	Zika	Dengue	NaN	NaN	NaN
Zika / Dengue	P80108	P80108	0.188774	0.188774	0.000184805	0.0002246	244	P80108	GPLD1	Phosphatidylinositol-glycan-specific phospholipase D	PHLD_HUMAN	25	13.9795	1.13979	Zika	Dengue	NaN	NaN	NaN
Zika / Dengue	P11021	P11021	-0.397992	0.397992	0.000201086	0.000242243	142	P11021	HSPA5	78 kDa glucose-regulated protein	GRP78_HUMAN	17	-24.1086	0.758914	Zika	Dengue	NaN	NaN	NaN
Zika / Dengue	P23083	P23083	-0.270802	0.270802	0.000216308	0.000259245	244	P23083	IGHV1-2	Immunoglobulin heavy variable 1-2	HV102_HUMAN	5	-17.1141	0.828859	Zika	Dengue	NaN	NaN	NaN
Zika / Dengue	P98160	P98160	-1.04029	1.04029	0.000216457	0.000259245	104	P98160	HSPG2	Basement membrane-specific heparan sulfate proteoglycan core protein	PGBM_HUMAN	27	-51.377	0.48623	Zika	Dengue	NaN	NaN	NaN
Zika / Dengue	P20160	P20160	-0.510666	0.510666	0.000231852	0.000275282	62	P20160	AZU1	Azurocidin	CAP7_HUMAN	4	-29.8102	0.701898	Zika	Dengue	NaN	NaN	NaN
Zika / Dengue	P22894	P22894	-0.462134	0.462134	0.000255041	0.000298514	14	P22894	MMP8	Neutrophil collagenase	MMP8_HUMAN	4	-27.4088	0.725912	Zika	Dengue	NaN	NaN	NaN
Zika / Dengue	P01859	P01859	0.291454	0.291454	0.000283163	0.000327706	244	P01859	IGHG2	Immunoglobulin heavy constant gamma 2	IGHG2_HUMAN	18	22.3873	1.22387	Zika	Dengue	NaN	NaN	NaN
Zika / Dengue	P00747	P00747	0.151514	0.151514	0.000285117	0.000329042	244	P00747	PLG	Plasminogen	PLMN_HUMAN	90	11.0734	1.11073	Zika	Dengue	NaN	NaN	NaN
Zika / Dengue	P80188;P80188-2;X6R8F3	P80188;P80188-2;X6R8F3	-0.817666	0.817666	0.000297718	0.000342625	92	P80188;P80188-2;X6R8F3	LCN2	Neutrophil gelatinase-associated lipocalin;Isoform 2 of Neutrophil gelatinase-associated lipocalin;Neutrophil gelatinase-associated lipocalin	NGAL_HUMAN;NGAL_HUMAN;X6R8F3_HUMAN	3	-43.2641	0.567359	Zika	Dengue	NaN	NaN	NaN
Zika / Dengue	E9PEK4;P07333	E9PEK4;P07333	-1.21591	1.21591	0.000298676	0.00034277	50	E9PEK4;P07333	CSF1R	Macrophage colony-stimulating factor 1 receptor	E9PEK4_HUMAN;CSF1R_HUMAN	8	-56.9499	0.430501	Zika	Dengue	NaN	NaN	NaN
Zika / Dengue	A0A0G2JMI3	A0A0G2JMI3	-0.43482	0.43482	0.000312028	0.000356331	192	A0A0G2JMI3	IGHV1-69-2	Immunoglobulin heavy variable 1-69-2	HV692_HUMAN	4	-26.0214	0.739786	Zika	Dengue	NaN	NaN	NaN
Zika / Dengue	A0A075B6I4;A0A1W2PQ80	A0A075B6I4;A0A1W2PQ80	0.543204	0.543204	0.000334938	0.000380762	182	A0A075B6I4;A0A1W2PQ80	IGLV10-54	Immunoglobulin lambda variable 10-54	LVX54_HUMAN;A0A1W2PQ80_HUMAN	1	45.7205	1.45721	Zika	Dengue	NaN	NaN	NaN
Zika / Dengue	P18206;P18206-2	P18206;P18206-2	-0.779693	0.779693	0.00035075	0.000394833	122	P18206;P18206-2	VCL	Vinculin;Isoform 1 of Vinculin	VINC_HUMAN	15	-41.7509	0.582491	Zika	Dengue	NaN	NaN	NaN
Zika / Dengue	Q9Y5Y7	Q9Y5Y7	-0.209797	0.209797	0.000359753	0.000403864	170	Q9Y5Y7	LYVE1	Lymphatic vessel endothelial hyaluronic acid receptor 1	LYVE1_HUMAN	6	-13.5341	0.864659	Zika	Dengue	NaN	NaN	NaN
Zika / Dengue	Q08380	Q08380	-0.313633	0.313633	0.000387915	0.000433119	244	Q08380	LGALS3BP	Galectin-3-binding protein	LG3BP_HUMAN	28	-19.5387	0.804613	Zika	Dengue	NaN	NaN	NaN
Zika / Dengue	Q96KN2	Q96KN2	0.383815	0.383815	0.000397429	0.000442542	204	Q96KN2	CNDP1	Beta-Ala-His dipeptidase	CNDP1_HUMAN	18	30.4787	1.30479	Zika	Dengue	NaN	NaN	NaN
Zika / Dengue	P08697	P08697	0.256459	0.256459	0.000401767	0.000446167	244	P08697	SERPINF2	Alpha-2-antiplasmin	A2AP_HUMAN	31	19.4543	1.19454	Zika	Dengue	NaN	NaN	NaN
Zika / Dengue	A0A140TA49	A0A140TA49	0.500137	0.500137	0.000421551	0.000463277	244	A0A140TA49	C4A	Complement C4-A	A0A140TA49_HUMAN	9	41.4348	1.41435	Zika	Dengue	NaN	NaN	NaN
Zika / Dengue	J3KSI6;Q14126	J3KSI6;Q14126	-0.518594	0.518594	0.000421672	0.000463277	74	J3KSI6;Q14126	DSG2	Desmoglein-2	J3KSI6_HUMAN;DSG2_HUMAN	1	-30.1948	0.698052	Zika	Dengue	NaN	NaN	NaN
Zika / Dengue	A0A0B4J231;B9A064	A0A0B4J231;B9A064	0.270695	0.270695	0.0004614	0.000501575	244	A0A0B4J231;B9A064	IGLL5	Immunoglobulin lambda-like polypeptide 5	A0A0B4J231_HUMAN;IGLL5_HUMAN	9	20.6389	1.20639	Zika	Dengue	NaN	NaN	NaN
Zika / Dengue	A0A075B6I0	A0A075B6I0	-0.478956	0.478956	0.000488757	0.000528525	242	A0A075B6I0	IGLV8-61	Immunoglobulin lambda variable 8-61	LV861_HUMAN	4	-28.2503	0.717497	Zika	Dengue	NaN	NaN	NaN
Zika / Dengue	Q02985;Q02985-2	Q02985;Q02985-2	-0.654027	0.654027	0.000560638	0.000594954	124	Q02985;Q02985-2	CFHR3	Complement factor H-related protein 3;Isoform 2 of Complement factor H-related protein 3	FHR3_HUMAN	3	-36.4496	0.635504	Zika	Dengue	NaN	NaN	NaN
Zika / Dengue	A0A0B4J2H0	A0A0B4J2H0	-0.466926	0.466926	0.00058831	0.000615925	244	A0A0B4J2H0	IGHV1-69D	Immunoglobulin heavy variable 1-69D	HV69D_HUMAN	5	-27.6495	0.723505	Zika	Dengue	NaN	NaN	NaN
Zika / Dengue	O00187	O00187	-0.275209	0.275209	0.000644036	0.00066837	208	O00187	MASP2	Mannan-binding lectin serine protease 2	MASP2_HUMAN	12	-17.3669	0.826331	Zika	Dengue	NaN	NaN	NaN
Zika / Dengue	P01743	P01743	-0.281054	0.281054	0.000672856	0.000694779	234	P01743	IGHV1-46	Immunoglobulin heavy variable 1-46	HV146_HUMAN	1	-17.7011	0.822989	Zika	Dengue	NaN	NaN	NaN
Zika / Dengue	Q08830	Q08830	-0.412102	0.412102	0.000682911	0.000703398	82	Q08830	FGL1	Fibrinogen-like protein 1	FGL1_HUMAN	10	-24.8473	0.751527	Zika	Dengue	NaN	NaN	NaN
Zika / Dengue	P01780	P01780	0.350339	0.350339	0.000744829	0.000757703	240	P01780	IGHV3-7	Immunoglobulin heavy variable 3-7	HV307_HUMAN	8	27.486	1.27486	Zika	Dengue	NaN	NaN	NaN
Zika / Dengue	P48740	P48740	0.411307	0.411307	0.000765948	0.000773458	244	P48740	MASP1	Mannan-binding lectin serine protease 1	MASP1_HUMAN	24	32.989	1.32989	Zika	Dengue	NaN	NaN	NaN
Zika / Dengue	P05362	P05362	-0.556067	0.556067	0.000812366	0.000814342	32	P05362	ICAM1	Intercellular adhesion molecule 1	ICAM1_HUMAN	9	-31.9846	0.680154	Zika	Dengue	NaN	NaN	NaN
Zika / Dengue	P01008	P01008	-0.131923	0.131923	0.000839458	0.000837425	244	P01008	SERPINC1	Antithrombin-III	ANT3_HUMAN	47	-8.73861	0.912614	Zika	Dengue	NaN	NaN	NaN
Zika / Dengue	A0A075B6P5;P01615	A0A075B6P5;P01615	-0.286911	0.286911	0.000861502	0.000855274	240	A0A075B6P5;P01615	IGKV2-28;IGKV2D-28	Immunoglobulin kappa variable 2-28;Immunoglobulin kappa variable 2D-28	KV228_HUMAN;KVD28_HUMAN	1	-18.0345	0.819655	Zika	Dengue	NaN	NaN	NaN
Zika / Dengue	A0A0J9YX35	A0A0J9YX35	0.349659	0.349659	0.000864576	0.000856262	244	A0A0J9YX35	IGHV3-64D	Immunoglobulin heavy variable 3-64D	HV64D_HUMAN	3	27.4259	1.27426	Zika	Dengue	NaN	NaN	NaN
Zika / Dengue	J3KNB4;P49913	J3KNB4;P49913	-0.678411	0.678411	0.000887896	0.000877249	140	J3KNB4;P49913	CAMP	Cathelicidin antimicrobial peptide	J3KNB4_HUMAN;CAMP_HUMAN	6	-37.5147	0.624853	Zika	Dengue	NaN	NaN	NaN
Zika / Dengue	P32119	P32119	0.96203	0.96203	0.000927104	0.000899962	220	P32119	PRDX2	Peroxiredoxin-2	PRDX2_HUMAN	13	94.8049	1.94805	Zika	Dengue	NaN	NaN	NaN
Zika / Dengue	A0A087WSY5;Q96IY4	A0A087WSY5;Q96IY4	0.221775	0.221775	0.000928217	0.000899962	244	A0A087WSY5;Q96IY4	CPB2	Carboxypeptidase B2	A0A087WSY5_HUMAN;CBPB2_HUMAN	11	16.6167	1.16617	Zika	Dengue	NaN	NaN	NaN
Zika / Dengue	A0A0B4J2D9;P0DP09	A0A0B4J2D9;P0DP09	0.615475	0.615475	0.000942311	0.000909995	218	A0A0B4J2D9;P0DP09	IGKV1D-13;IGKV1-13	Immunoglobulin kappa variable 1D-13;Immunoglobulin kappa variable 1-13	KVD13_HUMAN;KV113_HUMAN	3	53.2063	1.53206	Zika	Dengue	NaN	NaN	NaN
Zika / Dengue	Q86UX7;Q86UX7-2	Q86UX7;Q86UX7-2	-0.493487	0.493487	0.000943126	0.000909995	38	Q86UX7;Q86UX7-2	FERMT3	Fermitin family homolog 3;Isoform 2 of Fermitin family homolog 3	URP2_HUMAN	5	-28.9694	0.710306	Zika	Dengue	NaN	NaN	NaN
Zika / Dengue	P01833	P01833	-0.529168	0.529168	0.000952361	0.000916645	224	P01833	PIGR	Polymeric immunoglobulin receptor	PIGR_HUMAN	17	-30.7046	0.692954	Zika	Dengue	NaN	NaN	NaN
Zika / Dengue	G3XAP6;P49747	G3XAP6;P49747	-0.337601	0.337601	0.000980564	0.000933008	202	G3XAP6;P49747	COMP	Cartilage oligomeric matrix protein	G3XAP6_HUMAN;COMP_HUMAN	16	-20.8644	0.791356	Zika	Dengue	NaN	NaN	NaN
Zika / Dengue	P02652;V9GYM3	P02652;V9GYM3	0.23152	0.23152	0.000986001	0.00093602	244	P02652;V9GYM3	APOA2	Apolipoprotein A-II	APOA2_HUMAN;V9GYM3_HUMAN	12	17.4071	1.17407	Zika	Dengue	NaN	NaN	NaN
Zika / Dengue	Q08211	Q08211	-0.368643	0.368643	0.00107373	0.0010123	210	Q08211	DHX9	ATP-dependent RNA helicase A	DHX9_HUMAN	2	-22.549	0.77451	Zika	Dengue	NaN	NaN	NaN
Zika / Dengue	A0A0A0MS14	A0A0A0MS14	-0.218142	0.218142	0.00111551	0.00104691	244	A0A0A0MS14	IGHV1-45	Immunoglobulin heavy variable 1-45	HV145_HUMAN	3	-14.0328	0.859672	Zika	Dengue	NaN	NaN	NaN
Zika / Dengue	P10153	P10153	-1.01104	1.01104	0.00112864	0.00105588	34	P10153	RNASE2	Non-secretory ribonuclease	RNAS2_HUMAN	2	-50.3811	0.496189	Zika	Dengue	NaN	NaN	NaN
Zika / Dengue	A0A075B6R2	A0A075B6R2	-0.294638	0.294638	0.00114209	0.00106457	244	A0A075B6R2	IGHV4-4	Immunoglobulin heavy variable 4-4	HV404_HUMAN	8	-18.4723	0.815277	Zika	Dengue	NaN	NaN	NaN
Zika / Dengue	P01011	P01011	-0.245761	0.245761	0.00138405	0.00127	244	P01011	SERPINA3	Alpha-1-antichymotrypsin	AACT_HUMAN	39	-15.6629	0.843371	Zika	Dengue	NaN	NaN	NaN
Zika / Dengue	P18428	P18428	-0.284045	0.284045	0.00148561	0.00135414	244	P18428	LBP	Lipopolysaccharide-binding protein	LBP_HUMAN	18	-17.8715	0.821285	Zika	Dengue	NaN	NaN	NaN
Zika / Dengue	P61769	P61769	-0.368577	0.368577	0.00149709	0.00136031	238	P61769	B2M	Beta-2-microglobulin	B2MG_HUMAN	6	-22.5454	0.774546	Zika	Dengue	NaN	NaN	NaN
Zika / Dengue	P33908	P33908	-0.188187	0.188187	0.00157857	0.00142625	140	P33908	MAN1A1	Mannosyl-oligosaccharide 1,2-alpha-mannosidase IA	MA1A1_HUMAN	8	-12.2292	0.877708	Zika	Dengue	NaN	NaN	NaN
Zika / Dengue	P04217	P04217	0.169523	0.169523	0.00159112	0.00143172	244	P04217	A1BG	Alpha-1B-glycoprotein	A1BG_HUMAN	34	12.4687	1.12469	Zika	Dengue	NaN	NaN	NaN
Zika / Dengue	P01042-2	P01042-2	0.536859	0.536859	0.00160278	0.00143554	244	P01042-2	KNG1	Isoform LMW of Kininogen-1	KNG1_HUMAN	6	45.081	1.45081	Zika	Dengue	NaN	NaN	NaN
Zika / Dengue	Q96PD5	Q96PD5	0.0712684	0.0712684	0.00161346	0.00144197	244	Q96PD5	PGLYRP2	N-acetylmuramoyl-L-alanine amidase	PGRP2_HUMAN	33	5.064	1.05064	Zika	Dengue	NaN	NaN	NaN
Zika / Dengue	P05062	P05062	-2.87614	2.87614	0.00178467	0.00158126	46	P05062	ALDOB	Fructose-bisphosphate aldolase B	ALDOB_HUMAN	11	-86.3794	0.136206	Zika	Dengue	NaN	NaN	NaN
Zika / Dengue	P08246	P08246	-0.846959	0.846959	0.00182192	0.00161079	90	P08246	ELANE	Neutrophil elastase	ELNE_HUMAN	6	-44.4045	0.555955	Zika	Dengue	NaN	NaN	NaN
Zika / Dengue	O15439;O15439-2;O15439-3;O15439-4	O15439;O15439-2;O15439-3;O15439-4	-0.279723	0.279723	0.00212064	0.00183551	174	O15439;O15439-2;O15439-3;O15439-4	ABCC4	Multidrug resistance-associated protein 4;Isoform 2 of Multidrug resistance-associated protein 4;Isoform 3 of Multidrug resistance-associated protein 4;Isoform 4 of Multidrug resistance-associated protein 4	MRP4_HUMAN	1	-17.6251	0.823749	Zika	Dengue	NaN	NaN	NaN
Zika / Dengue	F5GX41;F5GXY9;P12318;P12318-2;V9GY83	F5GX41;F5GXY9;P12318;P12318-2;V9GY83	-1.12564	1.12564	0.00220552	0.00190498	64	F5GX41;F5GXY9;P12318;P12318-2;V9GY83	FCGR2A	Low affinity immunoglobulin gamma Fc region receptor II-a;Low affinity immunoglobulin gamma Fc region receptor II-a;Low affinity immunoglobulin gamma Fc region receptor II-a;Isoform 2 of Low affinity immunoglobulin gamma Fc region receptor II-a;Low affinity immunoglobulin gamma Fc region receptor II-a (Fragment)	F5GX41_HUMAN;F5GXY9_HUMAN;FCG2A_HUMAN;FCG2A_HUMAN;V9GY83_HUMAN	2	-54.17	0.4583	Zika	Dengue	NaN	NaN	NaN
Zika / Dengue	P01619	P01619	0.249734	0.249734	0.00238831	0.0020457	244	P01619	IGKV3-20	Immunoglobulin kappa variable 3-20	KV320_HUMAN	6	18.8988	1.18899	Zika	Dengue	NaN	NaN	NaN
Zika / Dengue	G3XAK1;P26927	G3XAK1;P26927	-0.209118	0.209118	0.00247327	0.002101	242	G3XAK1;P26927	MST1	Hepatocyte growth factor-like protein	G3XAK1_HUMAN;HGFL_HUMAN	34	-13.4934	0.865066	Zika	Dengue	NaN	NaN	NaN
Zika / Dengue	A0A0B4J2B5	A0A0B4J2B5	-0.235592	0.235592	0.00253385	0.00213924	244	A0A0B4J2B5	IGHV3OR16-9	Immunoglobulin heavy variable 3/OR16-9 (non-functional) (Fragment)	A0A0B4J2B5_HUMAN	1	-15.0664	0.849336	Zika	Dengue	NaN	NaN	NaN
Zika / Dengue	P01593;P01594	P01593;P01594	-0.188303	0.188303	0.00259469	0.00217279	244	P01593;P01594	IGKV1D-33;IGKV1-33	Immunoglobulin kappa variable 1D-33;Immunoglobulin kappa variable 1-33	KVD33_HUMAN;KV133_HUMAN	4	-12.2362	0.877638	Zika	Dengue	NaN	NaN	NaN
Zika / Dengue	Q9BUN1	Q9BUN1	0.45925	0.45925	0.00261202	0.00218286	58	Q9BUN1	MENT	Protein MENT	MENT_HUMAN	3	37.4827	1.37483	Zika	Dengue	NaN	NaN	NaN
Zika / Dengue	P23142-4	P23142-4	-0.272125	0.272125	0.00265819	0.00220802	244	P23142-4	FBLN1	Isoform C of Fibulin-1	FBLN1_HUMAN	10	-17.1901	0.828099	Zika	Dengue	NaN	NaN	NaN
Zika / Dengue	P34096	P34096	-0.795664	0.795664	0.00295918	0.00242382	50	P34096	RNASE4	Ribonuclease 4	RNAS4_HUMAN	5	-42.3922	0.576078	Zika	Dengue	NaN	NaN	NaN
Zika / Dengue	O00391	O00391	-0.188902	0.188902	0.00303459	0.00248066	242	O00391	QSOX1	Sulfhydryl oxidase 1	QSOX1_HUMAN	24	-12.2727	0.877273	Zika	Dengue	NaN	NaN	NaN
Zika / Dengue	P04430	P04430	-0.179549	0.179549	0.00320745	0.00261442	238	P04430	IGKV1-16	Immunoglobulin kappa variable 1-16	KV116_HUMAN	3	-11.7021	0.882979	Zika	Dengue	NaN	NaN	NaN
Zika / Dengue	P13645	P13645	-2.48597	2.48597	0.0032466	0.00263826	18	P13645	KRT10	Keratin, type I cytoskeletal 10	K1C10_HUMAN	21	-82.1496	0.178504	Zika	Dengue	NaN	NaN	NaN
Zika / Dengue	O14791;O14791-2	O14791;O14791-2	0.175261	0.175261	0.00335899	0.00271886	244	O14791;O14791-2	APOL1	Apolipoprotein L1;Isoform 2 of Apolipoprotein L1	APOL1_HUMAN	26	12.9169	1.12917	Zika	Dengue	NaN	NaN	NaN
Zika / Dengue	A0A0C4DH35	A0A0C4DH35	-0.218973	0.218973	0.00342009	0.0027629	244	A0A0C4DH35	IGHV3-35	Immunoglobulin heavy variable 3-35 (non-functional) (Fragment)	A0A0C4DH35_HUMAN	3	-14.0823	0.859177	Zika	Dengue	NaN	NaN	NaN
Zika / Dengue	B0YIW2;P02656	B0YIW2;P02656	0.277312	0.277312	0.0034688	0.00278586	244	B0YIW2;P02656	APOC3	Apolipoprotein C-III	B0YIW2_HUMAN;APOC3_HUMAN	6	21.1935	1.21193	Zika	Dengue	NaN	NaN	NaN
Zika / Dengue	A0A0B4J1R6;P29401;P29401-2	A0A0B4J1R6;P29401;P29401-2	-3.25319	3.25319	0.00359013	0.00286654	72	A0A0B4J1R6;P29401;P29401-2	TKT	Transketolase;Transketolase;Isoform 2 of Transketolase	A0A0B4J1R6_HUMAN;TKT_HUMAN;TKT_HUMAN	9	-89.512	0.10488	Zika	Dengue	NaN	NaN	NaN
Zika / Dengue	P55290;P55290-4	P55290;P55290-4	-0.31507	0.31507	0.00360884	0.0028759	186	P55290;P55290-4	CDH13	Cadherin-13;Isoform 4 of Cadherin-13	CAD13_HUMAN	5	-19.6188	0.803812	Zika	Dengue	NaN	NaN	NaN
Zika / Dengue	P07737	P07737	0.385997	0.385997	0.00362498	0.00288319	152	P07737	PFN1	Profilin-1	PROF1_HUMAN	10	30.6763	1.30676	Zika	Dengue	NaN	NaN	NaN
Zika / Dengue	P00742	P00742	-0.134725	0.134725	0.00376498	0.00298303	244	P00742	F10	Coagulation factor X	FA10_HUMAN	21	-8.91563	0.910844	Zika	Dengue	NaN	NaN	NaN
Zika / Dengue	P14780	P14780	-0.520458	0.520458	0.00415579	0.00325511	146	P14780	MMP9	Matrix metalloproteinase-9	MMP9_HUMAN	14	-30.2849	0.697151	Zika	Dengue	NaN	NaN	NaN
Zika / Dengue	P04406	P04406	0.490944	0.490944	0.0042066	0.00328865	92	P04406	GAPDH	Glyceraldehyde-3-phosphate dehydrogenase	G3P_HUMAN	11	40.5364	1.40536	Zika	Dengue	NaN	NaN	NaN
Zika / Dengue	A0A0J9YVT0;P0DP02	A0A0J9YVT0;P0DP02	-0.220551	0.220551	0.00423539	0.00330489	244	A0A0J9YVT0;P0DP02	IGHV3-33;IGHV3-30-3	Immunoglobulin heavy variable 3-33 (Fragment);Immunoglobulin heavy variable 3-30-3	A0A0J9YVT0_HUMAN;HVC33_HUMAN	12	-14.1762	0.858238	Zika	Dengue	NaN	NaN	NaN
Zika / Dengue	A0A087WZR4;H0Y4U3;M9MML6;O75015	A0A087WZR4;H0Y4U3;M9MML6;O75015	-0.700942	0.700942	0.00431665	0.00335558	36	A0A087WZR4;H0Y4U3;M9MML6;O75015	FCGR3B	Low affinity immunoglobulin gamma Fc region receptor III-B;Low affinity immunoglobulin gamma Fc region receptor III-B (Fragment);Low affinity immunoglobulin gamma Fc region receptor III-B;Low affinity immunoglobulin gamma Fc region receptor III-B	A0A087WZR4_HUMAN;H0Y4U3_HUMAN;M9MML6_HUMAN;FCG3B_HUMAN	3	-38.483	0.61517	Zika	Dengue	NaN	NaN	NaN
Zika / Dengue	P0DP08	P0DP08	-0.589893	0.589893	0.00441789	0.00342137	36	P0DP08	IGHV4-38-2	Immunoglobulin heavy variable 4-38-2	HVD82_HUMAN	2	-33.5608	0.664392	Zika	Dengue	NaN	NaN	NaN
Zika / Dengue	P16930;P16930-2	P16930;P16930-2	-4.23765	4.23765	0.0045696	0.00353222	34	P16930;P16930-2	FAH	Fumarylacetoacetase;Isoform 2 of Fumarylacetoacetase	FAAA_HUMAN	4	-94.6992	0.0530079	Zika	Dengue	NaN	NaN	NaN
Zika / Dengue	M0R3C9;Q9UM47	M0R3C9;Q9UM47	-1.44553	1.44553	0.00476116	0.00364609	24	M0R3C9;Q9UM47	NOTCH3	Neurogenic locus notch homolog protein 3 (Fragment);Neurogenic locus notch homolog protein 3	M0R3C9_HUMAN;NOTC3_HUMAN	3	-63.2843	0.367157	Zika	Dengue	NaN	NaN	NaN
Zika / Dengue	A0A140TA29	A0A140TA29	1.38884	1.38884	0.00487837	0.00372892	44	A0A140TA29	C4B	Complement C4-B	A0A140TA29_HUMAN	1	161.868	2.61868	Zika	Dengue	NaN	NaN	NaN
Zika / Dengue	P39060;P39060-1;P39060-2	P39060;P39060-1;P39060-2	0.00499881	0.00499881	0.00498565	0.00380386	34	P39060;P39060-1;P39060-2	COL18A1	Collagen alpha-1(XVIII) chain;Isoform 2 of Collagen alpha-1(XVIII) chain;Isoform 3 of Collagen alpha-1(XVIII) chain	COIA1_HUMAN	7	0.347092	1.00347	Zika	Dengue	NaN	NaN	NaN
Zika / Dengue	E9PFZ2	E9PFZ2	-0.000816454	0.000816454	0.00513365	0.00388798	192	E9PFZ2	CP	Ceruloplasmin	E9PFZ2_HUMAN	2	-0.0565763	0.999434	Zika	Dengue	NaN	NaN	NaN
Zika / Dengue	P06396	P06396	0.106623	0.106623	0.00517346	0.00390378	244	P06396	GSN	Gelsolin	GELS_HUMAN	65	7.67048	1.0767	Zika	Dengue	NaN	NaN	NaN
Zika / Dengue	P02753;Q5VY30	P02753;Q5VY30	0.226037	0.226037	0.00537561	0.00404152	244	P02753;Q5VY30	RBP4	Retinol-binding protein 4;Retinol binding protein 4, plasma, isoform CRA_b	RET4_HUMAN;Q5VY30_HUMAN	19	16.9618	1.16962	Zika	Dengue	NaN	NaN	NaN
Zika / Dengue	P07360	P07360	-0.121777	0.121777	0.00553649	0.00415489	244	P07360	C8G	Complement component C8 gamma chain	CO8G_HUMAN	13	-8.09453	0.919055	Zika	Dengue	NaN	NaN	NaN
Zika / Dengue	P03951;P03951-2	P03951;P03951-2	0.432861	0.432861	0.00596505	0.0044043	190	P03951;P03951-2	F11	Coagulation factor XI;Isoform 2 of Coagulation factor XI	FA11_HUMAN	17	34.9908	1.34991	Zika	Dengue	NaN	NaN	NaN
Zika / Dengue	P02751;P02751-15;P02751-3;P02751-7	P02751;P02751-15;P02751-3;P02751-7	-0.16791	0.16791	0.00688364	0.00498429	244	P02751;P02751-15;P02751-3;P02751-7	FN1	Fibronectin;Isoform 15 of Fibronectin;Isoform 3 of Fibronectin;Isoform 7 of Fibronectin	FINC_HUMAN	142	-10.9869	0.890131	Zika	Dengue	NaN	NaN	NaN
Zika / Dengue	A0A075B6H9	A0A075B6H9	0.467459	0.467459	0.00727774	0.00523882	236	A0A075B6H9	IGLV4-69	Immunoglobulin lambda variable 4-69	LV469_HUMAN	5	38.2672	1.38267	Zika	Dengue	NaN	NaN	NaN
Zika / Dengue	P01601	P01601	-0.63375	0.63375	0.00745856	0.00534422	232	P01601	IGKV1D-16	Immunoglobulin kappa variable 1D-16 (Fragment)	KVD16_HUMAN	2	-35.5501	0.644499	Zika	Dengue	NaN	NaN	NaN
Zika / Dengue	Q92496;Q92496-2	Q92496;Q92496-2	-0.259856	0.259856	0.00792793	0.00559299	236	Q92496;Q92496-2	CFHR4	Complement factor H-related protein 4;Isoform 2 of Complement factor H-related protein 4	FHR4_HUMAN	12	-16.4828	0.835172	Zika	Dengue	NaN	NaN	NaN
Zika / Dengue	P01860	P01860	-0.270957	0.270957	0.00802139	0.00563961	244	P01860	IGHG3	Immunoglobulin heavy constant gamma 3	IGHG3_HUMAN	25	-17.123	0.82877	Zika	Dengue	NaN	NaN	NaN
Zika / Dengue	A0A075B6K2	A0A075B6K2	0.890806	0.890806	0.00822176	0.00575105	50	A0A075B6K2	IGLV3-12	Immunoglobulin lambda variable 3-12	LV312_HUMAN	2	85.4211	1.85421	Zika	Dengue	NaN	NaN	NaN
Zika / Dengue	P01597;P04432	P01597;P04432	-0.417292	0.417292	0.00844142	0.00588471	218	P01597;P04432	IGKV1-39;IGKV1D-39	Immunoglobulin kappa variable 1-39;Immunoglobulin kappa variable 1D-39	KV139_HUMAN;KVD39_HUMAN	3	-25.1171	0.748829	Zika	Dengue	NaN	NaN	NaN
Zika / Dengue	A0A087X0Q4	A0A087X0Q4	0.230841	0.230841	0.00851274	0.00592441	244	A0A087X0Q4	IGKV2-40	Immunoglobulin kappa variable 2-40	A0A087X0Q4_HUMAN	7	17.3518	1.17352	Zika	Dengue	NaN	NaN	NaN
Zika / Dengue	A0A0C4DH43	A0A0C4DH43	0.250264	0.250264	0.00913451	0.00627819	242	A0A0C4DH43	IGHV2-70D	Immunoglobulin heavy variable 2-70D	HV70D_HUMAN	10	18.9425	1.18943	Zika	Dengue	NaN	NaN	NaN
Zika / Dengue	Q99969	Q99969	-0.56426	0.56426	0.0094492	0.00644548	48	Q99969	RARRES2	Retinoic acid receptor responder protein 2	RARR2_HUMAN	4	-32.3698	0.676302	Zika	Dengue	NaN	NaN	NaN
Zika / Dengue	Q15848	Q15848	-0.163765	0.163765	0.00979446	0.00665894	212	Q15848	ADIPOQ	Adiponectin	ADIPO_HUMAN	5	-10.7308	0.892692	Zika	Dengue	NaN	NaN	NaN
Zika / Dengue	O43866	O43866	0.278012	0.278012	0.00985849	0.00669143	244	O43866	CD5L	CD5 antigen-like	CD5L_HUMAN	21	21.2523	1.21252	Zika	Dengue	NaN	NaN	NaN
Zika / Dengue	P43652	P43652	0.231667	0.231667	0.0103994	0.00701723	244	P43652	AFM	Afamin	AFAM_HUMAN	59	17.4191	1.17419	Zika	Dengue	NaN	NaN	NaN
Zika / Dengue	P13671	P13671	-0.105068	0.105068	0.0109004	0.00730238	244	P13671	C6	Complement component C6	CO6_HUMAN	63	-7.02391	0.929761	Zika	Dengue	NaN	NaN	NaN
Zika / Dengue	E7EUF1;Q13822;Q13822-2;Q13822-3	E7EUF1;Q13822;Q13822-2;Q13822-3	-0.314953	0.314953	0.0109447	0.00732013	82	E7EUF1;Q13822;Q13822-2;Q13822-3	ENPP2	Ectonucleotide pyrophosphatase/phosphodiesterase family member 2;Ectonucleotide pyrophosphatase/phosphodiesterase family member 2;Isoform 2 of Ectonucleotide pyrophosphatase/phosphodiesterase family member 2;Isoform 3 of Ectonucleotide pyrophosphatase/phosphodiesterase family member 2	E7EUF1_HUMAN;ENPP2_HUMAN;ENPP2_HUMAN;ENPP2_HUMAN	12	-19.6123	0.803877	Zika	Dengue	NaN	NaN	NaN
Zika / Dengue	P01762	P01762	-0.469464	0.469464	0.0111974	0.0074289	228	P01762	IGHV3-11	Immunoglobulin heavy variable 3-11	HV311_HUMAN	3	-27.7767	0.722233	Zika	Dengue	NaN	NaN	NaN
Zika / Dengue	J3QQR8;J3QQX6;J3QRQ1;P13598	J3QQR8;J3QQX6;J3QRQ1;P13598	-0.422199	0.422199	0.011461	0.00754304	152	J3QQR8;J3QQX6;J3QRQ1;P13598	ICAM2	Intercellular adhesion molecule 2 (Fragment);Intercellular adhesion molecule 2 (Fragment);Intercellular adhesion molecule 2 (Fragment);Intercellular adhesion molecule 2	J3QQR8_HUMAN;J3QQX6_HUMAN;J3QRQ1_HUMAN;ICAM2_HUMAN	4	-25.3714	0.746286	Zika	Dengue	NaN	NaN	NaN
Zika / Dengue	P05534;P30447	P05534;P30447	-0.300412	0.300412	0.0126112	0.00824733	172	P05534;P30447	HLA-A	HLA class I histocompatibility antigen, A-24 alpha chain;HLA class I histocompatibility antigen, A-23 alpha chain	1A24_HUMAN;1A23_HUMAN	9	-18.798	0.81202	Zika	Dengue	NaN	NaN	NaN
Zika / Dengue	Q5VZR0;Q9H4G4	Q5VZR0;Q9H4G4	-0.885656	0.885656	0.0128406	0.00838403	42	Q5VZR0;Q9H4G4	GLIPR2	Golgi-associated plant pathogenesis-related protein 1	Q5VZR0_HUMAN;GAPR1_HUMAN	3	-45.8759	0.541241	Zika	Dengue	NaN	NaN	NaN
Zika / Dengue	P12955	P12955	-0.236726	0.236726	0.0142665	0.00919845	106	P12955	PEPD	Xaa-Pro dipeptidase	PEPD_HUMAN	10	-15.1331	0.848669	Zika	Dengue	NaN	NaN	NaN
Zika / Dengue	P00915	P00915	0.424725	0.424725	0.0151686	0.00971924	198	P00915	CA1	Carbonic anhydrase 1	CAH1_HUMAN	9	34.2317	1.34232	Zika	Dengue	NaN	NaN	NaN
Zika / Dengue	P01766	P01766	-0.136537	0.136537	0.0153825	0.0098105	244	P01766	IGHV3-13	Immunoglobulin heavy variable 3-13	HV313_HUMAN	3	-9.03	0.9097	Zika	Dengue	NaN	NaN	NaN
Zika / Dengue	E7ENL6;P12111;P12111-2;P12111-4	E7ENL6;P12111;P12111-2;P12111-4	-0.20392	0.20392	0.01571	0.0100039	82	E7ENL6;P12111;P12111-2;P12111-4	COL6A3	Collagen alpha-3(VI) chain;Collagen alpha-3(VI) chain;Isoform 2 of Collagen alpha-3(VI) chain;Isoform 4 of Collagen alpha-3(VI) chain	E7ENL6_HUMAN;CO6A3_HUMAN;CO6A3_HUMAN;CO6A3_HUMAN	22	-13.1811	0.868189	Zika	Dengue	NaN	NaN	NaN
Zika / Dengue	P02751-14;P02751-8	P02751-14;P02751-8	-0.253216	0.253216	0.0157649	0.0100234	240	P02751-14;P02751-8	FN1	Isoform 14 of Fibronectin;Isoform 8 of Fibronectin	FINC_HUMAN	1	-16.0976	0.839024	Zika	Dengue	NaN	NaN	NaN
Zika / Dengue	A0A0B4J1X5	A0A0B4J1X5	-0.115495	0.115495	0.0159139	0.0100869	244	A0A0B4J1X5	IGHV3-74	Immunoglobulin heavy variable 3-74	HV374_HUMAN	7	-7.69342	0.923066	Zika	Dengue	NaN	NaN	NaN
Zika / Dengue	A0A0G2JMB2	A0A0G2JMB2	0.245022	0.245022	0.0161398	0.0102145	242	A0A0G2JMB2	IGHA2	Immunoglobulin heavy constant alpha 2 (Fragment)	A0A0G2JMB2_HUMAN	27	18.5111	1.18511	Zika	Dengue	NaN	NaN	NaN
Zika / Dengue	Q9NPH3;Q9NPH3-2;Q9NPH3-5	Q9NPH3;Q9NPH3-2;Q9NPH3-5	-0.31603	0.31603	0.0164504	0.0103637	154	Q9NPH3;Q9NPH3-2;Q9NPH3-5	IL1RAP	Interleukin-1 receptor accessory protein;Isoform 2 of Interleukin-1 receptor accessory protein;Isoform 4 of Interleukin-1 receptor accessory protein	IL1AP_HUMAN	6	-19.6723	0.803277	Zika	Dengue	NaN	NaN	NaN
Zika / Dengue	E7EX60;E9PEP6;O14786;O14786-2;O14786-3;Q5JWQ6;Q5T7F0	E7EX60;E9PEP6;O14786;O14786-2;O14786-3;Q5JWQ6;Q5T7F0	-0.188386	0.188386	0.0164533	0.0103637	104	E7EX60;E9PEP6;O14786;O14786-2;O14786-3;Q5JWQ6;Q5T7F0	NRP1	Neuropilin-1;Neuropilin;Neuropilin-1;Isoform 2 of Neuropilin-1;Isoform 3 of Neuropilin-1;Neuropilin;Neuropilin	E7EX60_HUMAN;E9PEP6_HUMAN;NRP1_HUMAN;NRP1_HUMAN;NRP1_HUMAN;Q5JWQ6_HUMAN;Q5T7F0_HUMAN	3	-12.2413	0.877587	Zika	Dengue	NaN	NaN	NaN
Zika / Dengue	P06733	P06733	-1.41223	1.41223	0.0164763	0.0103637	36	P06733	ENO1	Alpha-enolase	ENOA_HUMAN	15	-62.427	0.37573	Zika	Dengue	NaN	NaN	NaN
Zika / Dengue	P0DJI9	P0DJI9	-0.261261	0.261261	0.0167749	0.0105355	170	P0DJI9	SAA2	Serum amyloid A-2 protein	SAA2_HUMAN	8	-16.5642	0.834358	Zika	Dengue	NaN	NaN	NaN
Zika / Dengue	A0A0C4DH29	A0A0C4DH29	-0.373906	0.373906	0.0171429	0.0107176	210	A0A0C4DH29	IGHV1-3	Immunoglobulin heavy variable 1-3	HV103_HUMAN	3	-22.831	0.77169	Zika	Dengue	NaN	NaN	NaN
Zika / Dengue	A0A0C4DH73;P01611	A0A0C4DH73;P01611	-0.929974	0.929974	0.0184783	0.0114655	244	A0A0C4DH73;P01611	IGKV1-12;IGKV1D-12	Immunoglobulin kappa variable 1-12;Immunoglobulin kappa variable 1D-12	KV112_HUMAN;KVD12_HUMAN	2	-47.5132	0.524868	Zika	Dengue	NaN	NaN	NaN
Zika / Dengue	A0A0C4DGZ8;P07359	A0A0C4DGZ8;P07359	-1.46059	1.46059	0.0188373	0.0116706	118	A0A0C4DGZ8;P07359	GP1BA	Glycoprotein Ib (Platelet), alpha polypeptide;Platelet glycoprotein Ib alpha chain	A0A0C4DGZ8_HUMAN;GP1BA_HUMAN	7	-63.6655	0.363345	Zika	Dengue	NaN	NaN	NaN
Zika / Dengue	A0A075B6H7	A0A075B6H7	-0.25773	0.25773	0.0190169	0.011729	152	A0A075B6H7	IGKV3-7	Immunoglobulin kappa variable 3-7 (non-functional) (Fragment)	A0A075B6H7_HUMAN	1	-16.3597	0.836403	Zika	Dengue	NaN	NaN	NaN
Zika / Dengue	P35579	P35579	-1.69175	1.69175	0.0190138	0.011729	16	P35579	MYH9	Myosin-9	MYH9_HUMAN	6	-69.0449	0.309551	Zika	Dengue	NaN	NaN	NaN
Zika / Dengue	P02774;P02774-3	P02774;P02774-3	-0.108874	0.108874	0.019052	0.0117331	244	P02774;P02774-3	GC	Vitamin D-binding protein;Isoform 3 of Vitamin D-binding protein	VTDB_HUMAN	66	-7.26884	0.927312	Zika	Dengue	NaN	NaN	NaN
Zika / Dengue	A0A0A0MT36	A0A0A0MT36	-0.281217	0.281217	0.0196322	0.0120544	242	A0A0A0MT36	IGKV6D-21	Immunoglobulin kappa variable 6D-21	KVD21_HUMAN	5	-17.7103	0.822897	Zika	Dengue	NaN	NaN	NaN
Zika / Dengue	P02743	P02743	0.130123	0.130123	0.0197682	0.0121198	244	P02743	APCS	Serum amyloid P-component	SAMP_HUMAN	14	9.43874	1.09439	Zika	Dengue	NaN	NaN	NaN
Zika / Dengue	A0A096LPE2	A0A096LPE2	0.215801	0.215801	0.0199993	0.0122432	244	A0A096LPE2	SAA2-SAA4	SAA2-SAA4 readthrough	A0A096LPE2_HUMAN	10	16.1348	1.16135	Zika	Dengue	NaN	NaN	NaN
Zika / Dengue	P07225	P07225	-0.159131	0.159131	0.0209851	0.012752	244	P07225	PROS1	Vitamin K-dependent protein S	PROS_HUMAN	33	-10.4436	0.895564	Zika	Dengue	NaN	NaN	NaN
Zika / Dengue	B7Z6Z4;F8VPF3;F8VZU9;F8W180;F8W1R7;G3V1V0;G3V1Y7;G8JLA2;J3KND3;P60660;P60660-2	B7Z6Z4;F8VPF3;F8VZU9;F8W180;F8W1R7;G3V1V0;G3V1Y7;G8JLA2;J3KND3;P60660;P60660-2	-1.13617	1.13617	0.0212503	0.0128563	14	B7Z6Z4;F8VPF3;F8VZU9;F8W180;F8W1R7;G3V1V0;G3V1Y7;G8JLA2;J3KND3;P60660;P60660-2	MYL6	Myosin light polypeptide 6;Myosin light polypeptide 6 (Fragment);Myosin light polypeptide 6;Myosin light polypeptide 6;Myosin light polypeptide 6;Myosin light polypeptide 6;Myosin light polypeptide 6;Myosin light polypeptide 6;Myosin light polypeptide 6;Myosin light polypeptide 6;Isoform Smooth muscle of Myosin light polypeptide 6	B7Z6Z4_HUMAN;F8VPF3_HUMAN;F8VZU9_HUMAN;F8W180_HUMAN;F8W1R7_HUMAN;G3V1V0_HUMAN;G3V1Y7_HUMAN;G8JLA2_HUMAN;J3KND3_HUMAN;MYL6_HUMAN;MYL6_HUMAN	2	-54.5034	0.454966	Zika	Dengue	NaN	NaN	NaN
Zika / Dengue	P03950	P03950	-0.274228	0.274228	0.0224209	0.013446	112	P03950	ANG	Angiogenin	ANGI_HUMAN	6	-17.3108	0.826892	Zika	Dengue	NaN	NaN	NaN
Zika / Dengue	P01706	P01706	0.282854	0.282854	0.0225924	0.0135291	244	P01706	IGLV2-11	Immunoglobulin lambda variable 2-11	LV211_HUMAN	6	21.6599	1.2166	Zika	Dengue	NaN	NaN	NaN
Zika / Dengue	E7ER44;P02788	E7ER44;P02788	-0.395774	0.395774	0.0229411	0.01367	210	E7ER44;P02788	LTF	Lactotransferrin	E7ER44_HUMAN;TRFL_HUMAN	47	-23.9919	0.760081	Zika	Dengue	NaN	NaN	NaN
Zika / Dengue	P37837	P37837	-1.39374	1.39374	0.0229077	0.01367	44	P37837	TALDO1	Transaldolase	TALDO_HUMAN	4	-61.9422	0.380578	Zika	Dengue	NaN	NaN	NaN
Zika / Dengue	H0Y512;Q9HDC9	H0Y512;Q9HDC9	0.234261	0.234261	0.0239377	0.0141497	202	H0Y512;Q9HDC9	APMAP	Adipocyte plasma membrane-associated protein (Fragment);Adipocyte plasma membrane-associated protein	H0Y512_HUMAN;APMAP_HUMAN	13	17.6304	1.1763	Zika	Dengue	NaN	NaN	NaN
Zika / Dengue	P0C0L5	P0C0L5	0.125625	0.125625	0.0249759	0.0147001	244	P0C0L5	C4B	Complement C4-B	CO4B_HUMAN	170	9.09805	1.09098	Zika	Dengue	NaN	NaN	NaN
Zika / Dengue	P59665;P59666	P59665;P59666	-0.320334	0.320334	0.0257718	0.0150396	240	P59665;P59666	DEFA1;DEFA3	Neutrophil defensin 1;Neutrophil defensin 3	DEF1_HUMAN;DEF3_HUMAN	5	-19.9116	0.800884	Zika	Dengue	NaN	NaN	NaN
Zika / Dengue	P06331	P06331	0.290332	0.290332	0.0262714	0.0152879	244	P06331	IGHV4-34	Immunoglobulin heavy variable 4-34	HV434_HUMAN	5	22.2922	1.22292	Zika	Dengue	NaN	NaN	NaN
Zika / Dengue	P35443	P35443	-0.184937	0.184937	0.0273951	0.0158969	234	P35443	THBS4	Thrombospondin-4	TSP4_HUMAN	13	-12.0313	0.879687	Zika	Dengue	NaN	NaN	NaN
Zika / Dengue	P67936	P67936	0.159244	0.159244	0.0278178	0.0161195	94	P67936	TPM4	Tropomyosin alpha-4 chain	TPM4_HUMAN	11	11.6702	1.1167	Zika	Dengue	NaN	NaN	NaN
Zika / Dengue	J3KPS3;P04075;P04075-2	J3KPS3;P04075;P04075-2	-0.781446	0.781446	0.0278999	0.0161443	66	J3KPS3;P04075;P04075-2	ALDOA	Fructose-bisphosphate aldolase;Fructose-bisphosphate aldolase A;Isoform 2 of Fructose-bisphosphate aldolase A	J3KPS3_HUMAN;ALDOA_HUMAN;ALDOA_HUMAN	8	-41.8217	0.581783	Zika	Dengue	NaN	NaN	NaN
Zika / Dengue	A0A075B6K0	A0A075B6K0	-0.716353	0.716353	0.0280561	0.0161893	140	A0A075B6K0	IGLV3-16	Immunoglobulin lambda variable 3-16	LV316_HUMAN	2	-39.1366	0.608634	Zika	Dengue	NaN	NaN	NaN
Zika / Dengue	P01871	P01871	0.168447	0.168447	0.0290829	0.016665	244	P01871	IGHM	Immunoglobulin heavy constant mu	IGHM_HUMAN	47	12.3848	1.12385	Zika	Dengue	NaN	NaN	NaN
Zika / Dengue	A0A087WSY6	A0A087WSY6	0.416658	0.416658	0.0294094	0.0168287	244	A0A087WSY6	IGKV3D-15	Immunoglobulin kappa variable 3D-15	KVD15_HUMAN	1	33.4832	1.33483	Zika	Dengue	NaN	NaN	NaN
Zika / Dengue	Q9Y6R7	Q9Y6R7	-0.44113	0.44113	0.0295684	0.0168962	244	Q9Y6R7	FCGBP	IgGFc-binding protein	FCGBP_HUMAN	63	-26.3442	0.736558	Zika	Dengue	NaN	NaN	NaN
Zika / Dengue	A0A087WTK0;A0A087WVC6;Q12913	A0A087WTK0;A0A087WVC6;Q12913	-0.358938	0.358938	0.0305644	0.0174124	176	A0A087WTK0;A0A087WVC6;Q12913	PTPRJ	Receptor-type tyrosine-protein phosphatase eta	A0A087WTK0_HUMAN;A0A087WVC6_HUMAN;PTPRJ_HUMAN	7	-22.0262	0.779738	Zika	Dengue	NaN	NaN	NaN
Zika / Dengue	C9JEE0	C9JEE0	-1.48959	1.48959	0.0305986	0.0174124	182	C9JEE0	IGLL1	Immunoglobulin lambda-like polypeptide 1 (Fragment)	C9JEE0_HUMAN	1	-64.3886	0.356114	Zika	Dengue	NaN	NaN	NaN
Zika / Dengue	P08185	P08185	-0.172452	0.172452	0.0313405	0.0177611	242	P08185	SERPINA6	Corticosteroid-binding globulin	CBG_HUMAN	15	-11.2667	0.887333	Zika	Dengue	NaN	NaN	NaN
Zika / Dengue	P01700	P01700	0.171212	0.171212	0.0320981	0.0181405	244	P01700	IGLV1-47	Immunoglobulin lambda variable 1-47	LV147_HUMAN	2	12.6004	1.126	Zika	Dengue	NaN	NaN	NaN
Zika / Dengue	P09871	P09871	-0.0609279	0.0609279	0.0324702	0.0183029	244	P09871	C1S	Complement C1s subcomponent	C1S_HUMAN	44	-4.13527	0.958647	Zika	Dengue	NaN	NaN	NaN
Zika / Dengue	A0A0B4J1V1	A0A0B4J1V1	-0.52901	0.52901	0.0335424	0.018802	36	A0A0B4J1V1	IGHV3-21	Immunoglobulin heavy variable 3-21	HV321_HUMAN	1	-30.697	0.69303	Zika	Dengue	NaN	NaN	NaN
Zika / Dengue	A0A0C4DH72	A0A0C4DH72	0.192155	0.192155	0.0340899	0.0190829	244	A0A0C4DH72	IGKV1-6	Immunoglobulin kappa variable 1-6	KV106_HUMAN	5	14.2469	1.14247	Zika	Dengue	NaN	NaN	NaN
Zika / Dengue	P01834	P01834	0.222279	0.222279	0.0355212	0.01975	244	P01834	IGKC	Immunoglobulin kappa constant	IGKC_HUMAN	21	16.6575	1.16658	Zika	Dengue	NaN	NaN	NaN
Zika / Dengue	P06681	P06681	-0.155553	0.155553	0.0355862	0.0197595	244	P06681	C2	Complement C2	CO2_HUMAN	12	-10.2212	0.897788	Zika	Dengue	NaN	NaN	NaN
Zika / Dengue	P29622	P29622	0.156758	0.156758	0.0370806	0.0205166	244	P29622	SERPINA4	Kallistatin	KAIN_HUMAN	22	11.478	1.11478	Zika	Dengue	NaN	NaN	NaN
Zika / Dengue	Q01459	Q01459	-0.601106	0.601106	0.0387691	0.0212972	42	Q01459	CTBS	Di-N-acetylchitobiase	DIAC_HUMAN	4	-34.0752	0.659248	Zika	Dengue	NaN	NaN	NaN
Zika / Dengue	P04433	P04433	0.154397	0.154397	0.0388565	0.0213168	244	P04433	IGKV3-11	Immunoglobulin kappa variable 3-11	KV311_HUMAN	5	11.2956	1.11296	Zika	Dengue	NaN	NaN	NaN
Zika / Dengue	A0A0C4DH67	A0A0C4DH67	0.0465024	0.0465024	0.0391449	0.0214313	242	A0A0C4DH67	IGKV1-8	Immunoglobulin kappa variable 1-8	KV108_HUMAN	7	3.27581	1.03276	Zika	Dengue	NaN	NaN	NaN
Zika / Dengue	P0DP01	P0DP01	-0.179765	0.179765	0.0392577	0.0214511	36	P0DP01	IGHV1-8	Immunoglobulin heavy variable 1-8	HV108_HUMAN	2	-11.7153	0.882847	Zika	Dengue	NaN	NaN	NaN
Zika / Dengue	P04264	P04264	-1.59495	1.59495	0.0398528	0.0217187	66	P04264	KRT1	Keratin, type II cytoskeletal 1	K2C1_HUMAN	19	-66.8966	0.331034	Zika	Dengue	NaN	NaN	NaN
Zika / Dengue	A0A075B6I9	A0A075B6I9	-0.254798	0.254798	0.0417904	0.022625	198	A0A075B6I9	IGLV7-46	Immunoglobulin lambda variable 7-46	LV746_HUMAN	2	-16.1896	0.838104	Zika	Dengue	NaN	NaN	NaN
Zika / Dengue	A0A075B7B8	A0A075B7B8	-0.269361	0.269361	0.042375	0.0229114	244	A0A075B7B8	IGHV3OR16-12	Immunoglobulin heavy variable 3/OR16-12 (non-functional) (Fragment)	A0A075B7B8_HUMAN	2	-17.0313	0.829687	Zika	Dengue	NaN	NaN	NaN
Zika / Dengue	E7EX29;P63104	E7EX29;P63104	-0.586313	0.586313	0.0430087	0.0231932	56	E7EX29;P63104	YWHAZ	14-3-3 protein zeta/delta (Fragment);14-3-3 protein zeta/delta	E7EX29_HUMAN;1433Z_HUMAN	4	-33.3957	0.666043	Zika	Dengue	NaN	NaN	NaN
Zika / Dengue	H3BMH2;H3BSC1;P62491;P62491-2;Q15907;Q15907-2	H3BMH2;H3BSC1;P62491;P62491-2;Q15907;Q15907-2	0.342408	0.342408	0.0434987	0.0233657	48	H3BMH2;H3BSC1;P62491;P62491-2;Q15907;Q15907-2	RAB11A;RAB11A;RAB11A;RAB11A;RAB11B;RAB11B	Ras-related protein Rab-11A (Fragment);Ras-related protein Rab-11A;Ras-related protein Rab-11A;Isoform 2 of Ras-related protein Rab-11A;Ras-related protein Rab-11B;Isoform 2 of Ras-related protein Rab-11B	H3BMH2_HUMAN;H3BSC1_HUMAN;RB11A_HUMAN;RB11A_HUMAN;RB11B_HUMAN;RB11B_HUMAN	3	26.7871	1.26787	Zika	Dengue	NaN	NaN	NaN
Zika / Dengue	A0A0J9YVY3	A0A0J9YVY3	-0.5383	0.5383	0.0439499	0.0235773	66	A0A0J9YVY3	IGHV7-4-1	Immunoglobulin heavy variable 7-4-1	HV741_HUMAN	2	-31.1418	0.688582	Zika	Dengue	NaN	NaN	NaN
Zika / Dengue	P62937	P62937	0.0695277	0.0695277	0.0457272	0.0244988	162	P62937	PPIA	Peptidyl-prolyl cis-trans isomerase A	PPIA_HUMAN	10	4.93731	1.04937	Zika	Dengue	NaN	NaN	NaN
Zika / Dengue	P01876	P01876	-0.224759	0.224759	0.0471748	0.0251111	242	P01876	IGHA1	Immunoglobulin heavy constant alpha 1	IGHA1_HUMAN	11	-14.4262	0.855738	Zika	Dengue	NaN	NaN	NaN
Zika / Dengue	A0A075B6K6	A0A075B6K6	0.894636	0.894636	0.0474041	0.0252007	28	A0A075B6K6	IGLV4-3	Immunoglobulin lambda variable 4-3	LV403_HUMAN	3	85.9141	1.85914	Zika	Dengue	NaN	NaN	NaN
Zika / Dengue	A0A0J9YW62	A0A0J9YW62	-0.366661	0.366661	0.0490683	0.0259514	126	A0A0J9YW62	NaN	Uncharacterized protein (Fragment)	A0A0J9YW62_HUMAN	1	-22.4424	0.775576	Zika	Dengue	NaN	NaN	NaN
Zika / Dengue	A0A0G2JS06	A0A0G2JS06	-0.151352	0.151352	0.0515829	0.0271074	234	A0A0G2JS06	IGLV5-39	Immunoglobulin lambda variable 5-39	LV539_HUMAN	5	-9.9594	0.900406	Zika	Dengue	NaN	NaN	NaN
Zika / Dengue	P05154	P05154	-0.53322	0.53322	0.052566	0.0275187	96	P05154	SERPINA5	Plasma serine protease inhibitor	IPSP_HUMAN	5	-30.8989	0.691011	Zika	Dengue	NaN	NaN	NaN
Zika / Dengue	P01704	P01704	0.335701	0.335701	0.0528832	0.0275796	194	P01704	IGLV2-14	Immunoglobulin lambda variable 2-14	LV214_HUMAN	1	26.199	1.26199	Zika	Dengue	NaN	NaN	NaN
Zika / Dengue	P11464;P11464-2;P11464-3;P11464-4	P11464;P11464-2;P11464-3;P11464-4	-3.35265	3.35265	0.0562786	0.0292393	10	P11464;P11464-2;P11464-3;P11464-4	PSG1	Pregnancy-specific beta-1-glycoprotein 1;Isoform 2 of Pregnancy-specific beta-1-glycoprotein 1;Isoform 3 of Pregnancy-specific beta-1-glycoprotein 1;Isoform 4 of Pregnancy-specific beta-1-glycoprotein 1	PSG1_HUMAN	9	-90.2107	0.097893	Zika	Dengue	NaN	NaN	NaN
Zika / Dengue	P04114	P04114	0.10691	0.10691	0.0573539	0.0297605	244	P04114	APOB	Apolipoprotein B-100	APOB_HUMAN	367	7.6919	1.07692	Zika	Dengue	NaN	NaN	NaN
Zika / Dengue	P37802;P37802-2;X6RJP6	P37802;P37802-2;X6RJP6	0.174925	0.174925	0.0632055	0.0324753	106	P37802;P37802-2;X6RJP6	TAGLN2	Transgelin-2;Isoform 2 of Transgelin-2;Transgelin-2 (Fragment)	TAGL2_HUMAN;TAGL2_HUMAN;X6RJP6_HUMAN	8	12.8906	1.12891	Zika	Dengue	NaN	NaN	NaN
Zika / Dengue	A0A075B7D0	A0A075B7D0	0.271396	0.271396	0.0632165	0.0324753	244	A0A075B7D0	IGHV1OR15-1	Immunoglobulin heavy variable 1/OR15-1 (non-functional) (Fragment)	A0A075B7D0_HUMAN	3	20.6975	1.20697	Zika	Dengue	NaN	NaN	NaN
Zika / Dengue	A0A140T951;A0A140T9A9;A0A140T9G0;A0A140T9H3;A0A140T9S9;A0A1W2PPR8;P01889;P03989;P18463;P30460;P30461;P30462;P30466;P30475;P30479;P30480;P30481;P30485;Q04826;Q29718;Q29836;Q95365	A0A140T951;A0A140T9A9;A0A140T9G0;A0A140T9H3;A0A140T9S9;A0A1W2PPR8;P01889;P03989;P18463;P30460;P30461;P30462;P30466;P30475;P30479;P30480;P30481;P30485;Q04826;Q29718;Q29836;Q95365	-0.221628	0.221628	0.0645101	0.0330986	26	A0A140T951;A0A140T9A9;A0A140T9G0;A0A140T9H3;A0A140T9S9;A0A1W2PPR8;P01889;P03989;P18463;P30460;P30461;P30462;P30466;P30475;P30479;P30480;P30481;P30485;Q04826;Q29718;Q29836;Q95365	HLA-B	HLA class I histocompatibility antigen, B-46 alpha chain (Fragment);HLA class I histocompatibility antigen, B-46 alpha chain (Fragment);HLA class I histocompatibility antigen, B-46 alpha chain (Fragment);HLA class I histocompatibility antigen, B-46 alpha chain (Fragment);HLA class I histocompatibility antigen, B-46 alpha chain (Fragment);HLA class I histocompatibility antigen, B-46 alpha chain;HL…	A0A140T951_HUMAN;A0A140T9A9_HUMAN;A0A140T9G0_HUMAN;A0A140T9H3_HUMAN;A0A140T9S9_HUMAN;A0A1W2PPR8_HUMAN;1B07_HUMAN;1B27_HUMAN;1B37_HUMAN;1B08_HUMAN;1B13_HUMAN;1B14_HUMAN;1B18_HUMAN;1B39_HUMAN;1B41_HUMAN;1B42_HUMAN;1B44_HUMAN;1B47_HUMAN;1B40_HUMAN;1B82_HUMAN;1B67_HUMAN;1B38_HUMAN	1	-14.2403	0.857597	Zika	Dengue	NaN	NaN	NaN
Zika / Dengue	P01701	P01701	-0.106604	0.106604	0.0649421	0.0332788	244	P01701	IGLV1-51	Immunoglobulin lambda variable 1-51	LV151_HUMAN	6	-7.12282	0.928772	Zika	Dengue	NaN	NaN	NaN
Zika / Dengue	B4DV12;F5GXK7;F5GYU3;F5GZ39;F5H265;F5H2Z3;F5H388;F5H6Q2;F5H747;J3QKN0;J3QS39;J3QSA3;J3QTR3;M0R1V7;P0CG47;P0CG48;P62979;P62987;Q49A90;Q5PY61;Q96C32	B4DV12;F5GXK7;F5GYU3;F5GZ39;F5H265;F5H2Z3;F5H388;F5H6Q2;F5H747;J3QKN0;J3QS39;J3QSA3;J3QTR3;M0R1V7;P0CG47;P0CG48;P62979;P62987;Q49A90;Q5PY61;Q96C32	1.43942	1.43942	0.0660891	0.0338245	10	B4DV12;F5GXK7;F5GYU3;F5GZ39;F5H265;F5H2Z3;F5H388;F5H6Q2;F5H747;J3QKN0;J3QS39;J3QSA3;J3QTR3;M0R1V7;P0CG47;P0CG48;P62979;P62987;Q49A90;Q5PY61;Q96C32	UBB;UBC;UBC;UBC;UBC;UBC;UBC;UBC;UBC;UBB;UBB;UBB;RPS27A;UBA52;UBB;UBC;RPS27A;UBA52;RPS27A;UBC;UBC	Polyubiquitin-B;Polyubiquitin-C (Fragment);Polyubiquitin-C (Fragment);Polyubiquitin-C (Fragment);Polyubiquitin-C (Fragment);Polyubiquitin-C (Fragment);Polyubiquitin-C (Fragment);Polyubiquitin-C (Fragment);Polyubiquitin-C (Fragment);Polyubiquitin-B (Fragment);Polyubiquitin-B (Fragment);Polyubiquitin-B (Fragment);Ubiquitin-40S ribosomal protein S27a (Fragment);Ubiquitin-60S ribosomal protein L40 (F…	B4DV12_HUMAN;F5GXK7_HUMAN;F5GYU3_HUMAN;F5GZ39_HUMAN;F5H265_HUMAN;F5H2Z3_HUMAN;F5H388_HUMAN;F5H6Q2_HUMAN;F5H747_HUMAN;J3QKN0_HUMAN;J3QS39_HUMAN;J3QSA3_HUMAN;J3QTR3_HUMAN;M0R1V7_HUMAN;UBB_HUMAN;UBC_HUMAN;RS27A_HUMAN;RL40_HUMAN;Q49A90_HUMAN;Q5PY61_HUMAN;Q96C32_HUMAN	1	171.212	2.71212	Zika	Dengue	NaN	NaN	NaN
Zika / Dengue	F8WF14;P06276	F8WF14;P06276	0.0876129	0.0876129	0.0708501	0.0359486	238	F8WF14;P06276	BCHE	Carboxylic ester hydrolase;Cholinesterase	F8WF14_HUMAN;CHLE_HUMAN	8	6.26105	1.06261	Zika	Dengue	NaN	NaN	NaN
Zika / Dengue	P02748	P02748	-0.0871279	0.0871279	0.0713784	0.0360967	244	P02748	C9	Complement component C9	CO9_HUMAN	51	-5.8605	0.941395	Zika	Dengue	NaN	NaN	NaN
Zika / Dengue	O75882-2	O75882-2	0.125758	0.125758	0.0734667	0.0370028	244	O75882-2	ATRN	Isoform 2 of Attractin	ATRN_HUMAN	43	9.1081	1.09108	Zika	Dengue	NaN	NaN	NaN
Zika / Dengue	A0A0C4DFP6;Q9NQ79;Q9NQ79-2	A0A0C4DFP6;Q9NQ79;Q9NQ79-2	-0.0451068	0.0451068	0.0738053	0.037128	238	A0A0C4DFP6;Q9NQ79;Q9NQ79-2	CRTAC1	Cartilage acidic protein 1;Cartilage acidic protein 1;Isoform 2 of Cartilage acidic protein 1	A0A0C4DFP6_HUMAN;CRAC1_HUMAN;CRAC1_HUMAN	15	-3.07819	0.969218	Zika	Dengue	NaN	NaN	NaN
Zika / Dengue	P07996	P07996	0.162123	0.162123	0.0751018	0.0376881	238	P07996	THBS1	Thrombospondin-1	TSP1_HUMAN	57	11.8933	1.11893	Zika	Dengue	NaN	NaN	NaN
Zika / Dengue	A0A0B4J1V2	A0A0B4J1V2	-0.00173199	0.00173199	0.0763882	0.0382405	232	A0A0B4J1V2	IGHV2-26	Immunoglobulin heavy variable 2-26	HV226_HUMAN	8	-0.11998	0.9988	Zika	Dengue	NaN	NaN	NaN
Zika / Dengue	P01742	P01742	-0.149954	0.149954	0.0786363	0.0391282	226	P01742	IGHV1-69	Immunoglobulin heavy variable 1-69	HV169_HUMAN	2	-9.87209	0.901279	Zika	Dengue	NaN	NaN	NaN
Zika / Dengue	P62805	P62805	-0.30821	0.30821	0.0798481	0.0396354	72	P62805	HIST1H4A	Histone H4	H4_HUMAN	5	-19.2357	0.807643	Zika	Dengue	NaN	NaN	NaN
Zika / Dengue	P35908	P35908	-1.0468	1.0468	0.0797614	0.0396354	16	P35908	KRT2	Keratin, type II cytoskeletal 2 epidermal	K22E_HUMAN	19	-51.5959	0.484041	Zika	Dengue	NaN	NaN	NaN
Zika / Dengue	Q13790	Q13790	-0.287042	0.287042	0.0821273	0.0407178	192	Q13790	APOF	Apolipoprotein F	APOF_HUMAN	3	-18.0419	0.819581	Zika	Dengue	NaN	NaN	NaN
Zika / Dengue	A6XND0;A6XND1;P17936;P17936-2	A6XND0;A6XND1;P17936;P17936-2	0.0793385	0.0793385	0.0855585	0.0422157	232	A6XND0;A6XND1;P17936;P17936-2	IGFBP3	Insulin-like growth factor-binding protein 3;Insulin-like growth factor binding protein 3 isoform b;Insulin-like growth factor-binding protein 3;Isoform 2 of Insulin-like growth factor-binding protein 3	A6XND0_HUMAN;A6XND1_HUMAN;IBP3_HUMAN;IBP3_HUMAN	11	5.65335	1.05653	Zika	Dengue	NaN	NaN	NaN
Zika / Dengue	P09486	P09486	-1.30292	1.30292	0.0886051	0.043304	174	P09486	SPARC	SPARC	SPRC_HUMAN	10	-59.4694	0.405306	Zika	Dengue	NaN	NaN	NaN
Zika / Dengue	P01602	P01602	-0.0646647	0.0646647	0.0902694	0.0439091	244	P01602	IGKV1-5	Immunoglobulin kappa variable 1-5	KV105_HUMAN	5	-4.38325	0.956168	Zika	Dengue	NaN	NaN	NaN
Zika / Dengue	A0A0C4DH55;A0A0C4DH90	A0A0C4DH55;A0A0C4DH90	0.167354	0.167354	0.0923714	0.0448257	240	A0A0C4DH55;A0A0C4DH90	IGKV3D-7;IGKV3OR2-268	Immunoglobulin kappa variable 3D-7;Immunoglobulin kappa variable 3/OR2-268 (non-functional) (Fragment)	KVD07_HUMAN;A0A0C4DH90_HUMAN	1	12.2997	1.123	Zika	Dengue	NaN	NaN	NaN
Zika / Dengue	A0A075B6Q5	A0A075B6Q5	0.213234	0.213234	0.095627	0.0460261	160	A0A075B6Q5	IGHV3-64	Immunoglobulin heavy variable 3-64	HV364_HUMAN	2	15.9284	1.15928	Zika	Dengue	NaN	NaN	NaN
Zika / Dengue	Q13103	Q13103	-0.143848	0.143848	0.0987243	0.0472958	166	Q13103	SPP2	Secreted phosphoprotein 24	SPP24_HUMAN	4	-9.48979	0.905102	Zika	Dengue	NaN	NaN	NaN
Zika / Dengue	P19823	P19823	0.0594793	0.0594793	0.100758	0.0479357	244	P19823	ITIH2	Inter-alpha-trypsin inhibitor heavy chain H2	ITIH2_HUMAN	58	4.20896	1.04209	Zika	Dengue	NaN	NaN	NaN
Zika / Dengue	P35527	P35527	-1.02634	1.02634	0.105701	0.0499411	16	P35527	KRT9	Keratin, type I cytoskeletal 9	K1C9_HUMAN	10	-50.9045	0.490955	Zika	Dengue	NaN	NaN	NaN
Zika / Dengue	P02649	P02649	0.133727	0.133727	0.107333	0.0505963	244	P02649	APOE	Apolipoprotein E	APOE_HUMAN	37	9.71247	1.09712	Zika	Dengue	NaN	NaN	NaN
Zika / Dengue	P01033;Q5H9A7	P01033;Q5H9A7	-0.57411	0.57411	0.107535	0.0506336	88	P01033;Q5H9A7	TIMP1	Metalloproteinase inhibitor 1	TIMP1_HUMAN;Q5H9A7_HUMAN	3	-32.83	0.6717	Zika	Dengue	NaN	NaN	NaN
Zika / Dengue	P05109	P05109	-0.271617	0.271617	0.107697	0.0506519	214	P05109	S100A8	Protein S100-A8	S10A8_HUMAN	4	-17.1609	0.828391	Zika	Dengue	NaN	NaN	NaN
Zika / Dengue	A0A0C4DH36	A0A0C4DH36	0.0430065	0.0430065	0.10812	0.0507929	244	A0A0C4DH36	IGHV3-38	Immunoglobulin heavy variable 3-38 (non-functional) (Fragment)	A0A0C4DH36_HUMAN	4	3.02586	1.03026	Zika	Dengue	NaN	NaN	NaN
Zika / Dengue	Q6UX71	Q6UX71	-0.139012	0.139012	0.109978	0.0512569	114	Q6UX71	PLXDC2	Plexin domain-containing protein 2	PXDC2_HUMAN	7	-9.18589	0.908141	Zika	Dengue	NaN	NaN	NaN
Zika / Dengue	F8VYK9;P24592	F8VYK9;P24592	-0.346201	0.346201	0.111677	0.0519897	54	F8VYK9;P24592	IGFBP6	Insulin-like growth factor-binding protein 6	F8VYK9_HUMAN;IBP6_HUMAN	4	-21.3347	0.786653	Zika	Dengue	NaN	NaN	NaN
Zika / Dengue	A0A0C4DGB6	A0A0C4DGB6	-0.279587	0.279587	0.112883	0.0524328	114	A0A0C4DGB6	ALB	Serum albumin	A0A0C4DGB6_HUMAN	1	-17.6173	0.823827	Zika	Dengue	NaN	NaN	NaN
Zika / Dengue	P08567	P08567	0.409889	0.409889	0.113212	0.0525261	32	P08567	PLEK	Pleckstrin	PLEK_HUMAN	8	32.8584	1.32858	Zika	Dengue	NaN	NaN	NaN
Zika / Dengue	P27918	P27918	-0.1493	0.1493	0.11406	0.0528007	244	P27918	CFP	Properdin	PROP_HUMAN	16	-9.83123	0.901688	Zika	Dengue	NaN	NaN	NaN
Zika / Dengue	P08514;P08514-2;P08514-3	P08514;P08514-2;P08514-3	-1.27193	1.27193	0.1162	0.0533749	20	P08514;P08514-2;P08514-3	ITGA2B	Integrin alpha-IIb;Isoform 2 of Integrin alpha-IIb;Isoform 3 of Integrin alpha-IIb	ITA2B_HUMAN	6	-58.5893	0.414107	Zika	Dengue	NaN	NaN	NaN
Zika / Dengue	Q9BXR6	Q9BXR6	-0.149727	0.149727	0.116947	0.0534973	220	Q9BXR6	CFHR5	Complement factor H-related protein 5	FHR5_HUMAN	21	-9.85787	0.901421	Zika	Dengue	NaN	NaN	NaN
Zika / Dengue	E9PK25;G3V1A4;P23528	E9PK25;G3V1A4;P23528	-0.0338221	0.0338221	0.116993	0.0534973	94	E9PK25;G3V1A4;P23528	CFL1	Cofilin-1;Cofilin 1 (Non-muscle), isoform CRA_a;Cofilin-1	E9PK25_HUMAN;G3V1A4_HUMAN;COF1_HUMAN	9	-2.3171	0.976829	Zika	Dengue	NaN	NaN	NaN
Zika / Dengue	P36955	P36955	0.0875882	0.0875882	0.12262	0.0558226	244	P36955	SERPINF1	Pigment epithelium-derived factor	PEDF_HUMAN	34	6.25923	1.06259	Zika	Dengue	NaN	NaN	NaN
Zika / Dengue	P55774	P55774	-0.0287418	0.0287418	0.123514	0.0561055	10	P55774	CCL18	C-C motif chemokine 18	CCL18_HUMAN	2	-1.97251	0.980275	Zika	Dengue	NaN	NaN	NaN
Zika / Dengue	P10721;P10721-2;P10721-3	P10721;P10721-2;P10721-3	0.111224	0.111224	0.123975	0.0562532	32	P10721;P10721-2;P10721-3	KIT	Mast/stem cell growth factor receptor Kit;Isoform 2 of Mast/stem cell growth factor receptor Kit;Isoform 3 of Mast/stem cell growth factor receptor Kit	KIT_HUMAN	4	8.01442	1.08014	Zika	Dengue	NaN	NaN	NaN
Zika / Dengue	P05155;P05155-3	P05155;P05155-3	0.113681	0.113681	0.125376	0.0566263	244	P05155;P05155-3	SERPING1	Plasma protease C1 inhibitor;Isoform 3 of Plasma protease C1 inhibitor	IC1_HUMAN	37	8.19857	1.08199	Zika	Dengue	NaN	NaN	NaN
Zika / Dengue	A0A0U1RQQ4;Q9UNN8	A0A0U1RQQ4;Q9UNN8	0.220445	0.220445	0.126495	0.0568951	120	A0A0U1RQQ4;Q9UNN8	PROCR	Endothelial protein C receptor (Fragment);Endothelial protein C receptor	A0A0U1RQQ4_HUMAN;EPCR_HUMAN	3	16.5093	1.16509	Zika	Dengue	NaN	NaN	NaN
Zika / Dengue	P33151	P33151	-0.0936504	0.0936504	0.133187	0.0594508	240	P33151	CDH5	Cadherin-5	CADH5_HUMAN	16	-6.28515	0.937149	Zika	Dengue	NaN	NaN	NaN
Zika / Dengue	P25311	P25311	0.132175	0.132175	0.135692	0.0602424	244	P25311	AZGP1	Zinc-alpha-2-glycoprotein	ZA2G_HUMAN	30	9.5945	1.09595	Zika	Dengue	NaN	NaN	NaN
Zika / Dengue	E9PHK0;P05452	E9PHK0;P05452	0.0478192	0.0478192	0.135538	0.0602424	244	E9PHK0;P05452	CLEC3B	Tetranectin	E9PHK0_HUMAN;TETN_HUMAN	11	3.37012	1.0337	Zika	Dengue	NaN	NaN	NaN
Zika / Dengue	P02749	P02749	0.112492	0.112492	0.136066	0.0603434	244	P02749	APOH	Beta-2-glycoprotein 1	APOH_HUMAN	30	8.10938	1.08109	Zika	Dengue	NaN	NaN	NaN
Zika / Dengue	A0A0B4J1X8	A0A0B4J1X8	-0.023575	0.023575	0.138386	0.0613064	244	A0A0B4J1X8	IGHV3-43	Immunoglobulin heavy variable 3-43	HV343_HUMAN	3	-1.62082	0.983792	Zika	Dengue	NaN	NaN	NaN
Zika / Dengue	A0A0B4J1V0	A0A0B4J1V0	-0.0626048	0.0626048	0.139796	0.061732	240	A0A0B4J1V0	IGHV3-15	Immunoglobulin heavy variable 3-15	HV315_HUMAN	10	-4.24663	0.957534	Zika	Dengue	NaN	NaN	NaN
Zika / Dengue	A0A075B6J1	A0A075B6J1	0.24129	0.24129	0.144639	0.063666	98	A0A075B6J1	IGLV5-37	Immunoglobulin lambda variable 5-37	LV537_HUMAN	2	18.2049	1.18205	Zika	Dengue	NaN	NaN	NaN
Zika / Dengue	P60709;P63261	P60709;P63261	-0.244855	0.244855	0.145223	0.0638548	244	P60709;P63261	ACTB;ACTG1	Actin, cytoplasmic 1;Actin, cytoplasmic 2	ACTB_HUMAN;ACTG_HUMAN	26	-15.6099	0.843901	Zika	Dengue	NaN	NaN	NaN
Zika / Dengue	Q92905	Q92905	-0.127378	0.127378	0.146139	0.0641575	162	Q92905	COPS5	COP9 signalosome complex subunit 5	CSN5_HUMAN	1	-8.45065	0.915494	Zika	Dengue	NaN	NaN	NaN
Zika / Dengue	P02750	P02750	-0.107007	0.107007	0.147121	0.0644829	244	P02750	LRG1	Leucine-rich alpha-2-glycoprotein	A2GL_HUMAN	20	-7.14876	0.928512	Zika	Dengue	NaN	NaN	NaN
Zika / Dengue	A0A0C4DH24	A0A0C4DH24	-0.12576	0.12576	0.147397	0.064535	180	A0A0C4DH24	IGKV6-21	Immunoglobulin kappa variable 6-21	KV621_HUMAN	1	-8.34792	0.916521	Zika	Dengue	NaN	NaN	NaN
Zika / Dengue	A0A075B6K4	A0A075B6K4	-0.0848924	0.0848924	0.147703	0.0646003	244	A0A075B6K4	IGLV3-10	Immunoglobulin lambda variable 3-10	LV310_HUMAN	7	-5.71452	0.942855	Zika	Dengue	NaN	NaN	NaN
Zika / Dengue	Q6UXB8;Q6UXB8-2	Q6UXB8;Q6UXB8-2	-0.144748	0.144748	0.148044	0.0646808	196	Q6UXB8;Q6UXB8-2	PI16	Peptidase inhibitor 16;Isoform 2 of Peptidase inhibitor 16	PI16_HUMAN	9	-9.54629	0.904537	Zika	Dengue	NaN	NaN	NaN
Zika / Dengue	A0A075B6I1	A0A075B6I1	-0.0349067	0.0349067	0.150763	0.0656598	212	A0A075B6I1	IGLV4-60	Immunoglobulin lambda variable 4-60	LV460_HUMAN	4	-2.39051	0.976095	Zika	Dengue	NaN	NaN	NaN
Zika / Dengue	P00738	P00738	-0.140561	0.140561	0.152599	0.0663193	244	P00738	HP	Haptoglobin	HPT_HUMAN	56	-9.28337	0.907166	Zika	Dengue	NaN	NaN	NaN
Zika / Dengue	Q06033;Q06033-2	Q06033;Q06033-2	-0.0203651	0.0203651	0.153019	0.0664319	244	Q06033;Q06033-2	ITIH3	Inter-alpha-trypsin inhibitor heavy chain H3;Isoform 2 of Inter-alpha-trypsin inhibitor heavy chain H3	ITIH3_HUMAN	44	-1.40168	0.985983	Zika	Dengue	NaN	NaN	NaN
Zika / Dengue	O95497	O95497	-0.335787	0.335787	0.155136	0.0671386	86	O95497	VNN1	Pantetheinase	VNN1_HUMAN	5	-20.7648	0.792352	Zika	Dengue	NaN	NaN	NaN
Zika / Dengue	A0A0G2JRQ6	A0A0G2JRQ6	-0.137545	0.137545	0.157771	0.0680513	244	A0A0G2JRQ6	NaN	Uncharacterized protein (Fragment)	A0A0G2JRQ6_HUMAN	5	-9.0935	0.909065	Zika	Dengue	NaN	NaN	NaN
Zika / Dengue	Q6ZRK6	Q6ZRK6	-0.143797	0.143797	0.168045	0.0718945	76	Q6ZRK6	CCDC73	Coiled-coil domain-containing protein 73	CCD73_HUMAN	1	-9.48664	0.905134	Zika	Dengue	NaN	NaN	NaN
Zika / Dengue	A0A1W2PP64	A0A1W2PP64	0.00471375	0.00471375	0.173259	0.0737424	242	A0A1W2PP64	NaN	Uncharacterized protein	A0A1W2PP64_HUMAN	1	0.327267	1.00327	Zika	Dengue	NaN	NaN	NaN
Zika / Dengue	P68363	P68363	-0.021844	0.021844	0.179315	0.0757722	14	P68363	TUBA1B	Tubulin alpha-1B chain	TBA1B_HUMAN	8	-1.50271	0.984973	Zika	Dengue	NaN	NaN	NaN
Zika / Dengue	P01817	P01817	0.152469	0.152469	0.180047	0.0759255	208	P01817	IGHV2-5	Immunoglobulin heavy variable 2-5	HV205_HUMAN	7	11.147	1.11147	Zika	Dengue	NaN	NaN	NaN
Zika / Dengue	C9JHR8;F5GZZ9;Q86VB7;Q86VB7-2;Q86VB7-3;Q86VB7-4	C9JHR8;F5GZZ9;Q86VB7;Q86VB7-2;Q86VB7-3;Q86VB7-4	0.287288	0.287288	0.181854	0.0763749	110	C9JHR8;F5GZZ9;Q86VB7;Q86VB7-2;Q86VB7-3;Q86VB7-4	CD163	Scavenger receptor cysteine-rich type 1 protein M130;Scavenger receptor cysteine-rich type 1 protein M130;Scavenger receptor cysteine-rich type 1 protein M130;Isoform 2 of Scavenger receptor cysteine-rich type 1 protein M130;Isoform 3 of Scavenger receptor cysteine-rich type 1 protein M130;Isoform 4 of Scavenger receptor cysteine-rich type 1 protein M130	C9JHR8_HUMAN;F5GZZ9_HUMAN;C163A_HUMAN;C163A_HUMAN;C163A_HUMAN;C163A_HUMAN	15	22.0344	1.22034	Zika	Dengue	NaN	NaN	NaN
Zika / Dengue	P04180	P04180	0.0406614	0.0406614	0.182467	0.0765545	242	P04180	LCAT	Phosphatidylcholine-sterol acyltransferase	LCAT_HUMAN	9	2.85853	1.02859	Zika	Dengue	NaN	NaN	NaN
Zika / Dengue	P07195	P07195	0.933662	0.933662	0.184967	0.0773671	186	P07195	LDHB	L-lactate dehydrogenase B chain	LDHB_HUMAN	12	91.0118	1.91012	Zika	Dengue	NaN	NaN	NaN
Zika / Dengue	P43251;P43251-2;P43251-3;P43251-4	P43251;P43251-2;P43251-3;P43251-4	-0.0693373	0.0693373	0.185372	0.0774577	244	P43251;P43251-2;P43251-3;P43251-4	BTD	Biotinidase;Isoform 2 of Biotinidase;Isoform 3 of Biotinidase;Isoform 4 of Biotinidase	BTD_HUMAN	9	-4.69243	0.953076	Zika	Dengue	NaN	NaN	NaN
Zika / Dengue	A0A0C4DH30	A0A0C4DH30	-0.192957	0.192957	0.187081	0.0780137	114	A0A0C4DH30	IGHV3-16	Immunoglobulin heavy variable 3-16 (non-functional) (Fragment)	A0A0C4DH30_HUMAN	1	-12.5189	0.874811	Zika	Dengue	NaN	NaN	NaN
Zika / Dengue	A0M8Q6	A0M8Q6	-0.588994	0.588994	0.190086	0.078947	218	A0M8Q6	IGLC7	Immunoglobulin lambda constant 7	IGLC7_HUMAN	4	-33.5194	0.664806	Zika	Dengue	NaN	NaN	NaN
Zika / Dengue	H0Y300	H0Y300	0.185862	0.185862	0.190758	0.0791463	56	H0Y300	HP	Haptoglobin	H0Y300_HUMAN	2	13.7497	1.1375	Zika	Dengue	NaN	NaN	NaN
Zika / Dengue	B4DPQ0	B4DPQ0	-0.106898	0.106898	0.195209	0.0807489	244	B4DPQ0	C1R	Complement C1r subcomponent	B4DPQ0_HUMAN	54	-7.14174	0.928583	Zika	Dengue	NaN	NaN	NaN
Zika / Dengue	P19652	P19652	0.125434	0.125434	0.198788	0.0819005	244	P19652	ORM2	Alpha-1-acid glycoprotein 2	A1AG2_HUMAN	21	9.08359	1.09084	Zika	Dengue	NaN	NaN	NaN
Zika / Dengue	Q15166	Q15166	-0.0996289	0.0996289	0.205297	0.0844134	100	Q15166	PON3	Serum paraoxonase/lactonase 3	PON3_HUMAN	8	-6.6727	0.933273	Zika	Dengue	NaN	NaN	NaN
Zika / Dengue	A0A0A0MSA9;A0A0C4DG49;P15151;P15151-2;P15151-3;P15151-4	A0A0A0MSA9;A0A0C4DG49;P15151;P15151-2;P15151-3;P15151-4	-0.194366	0.194366	0.207234	0.085125	112	A0A0A0MSA9;A0A0C4DG49;P15151;P15151-2;P15151-3;P15151-4	PVR	Poliovirus receptor;Poliovirus receptor;Poliovirus receptor;Isoform Beta of Poliovirus receptor;Isoform Gamma of Poliovirus receptor;Isoform Delta of Poliovirus receptor	A0A0A0MSA9_HUMAN;A0A0C4DG49_HUMAN;PVR_HUMAN;PVR_HUMAN;PVR_HUMAN;PVR_HUMAN	3	-12.6043	0.873957	Zika	Dengue	NaN	NaN	NaN
Zika / Dengue	A0A0C4DH38	A0A0C4DH38	0.117307	0.117307	0.210716	0.0859554	244	A0A0C4DH38	IGHV5-51	Immunoglobulin heavy variable 5-51	HV551_HUMAN	8	8.47079	1.08471	Zika	Dengue	NaN	NaN	NaN
Zika / Dengue	P01718	P01718	0.239112	0.239112	0.215259	0.0874623	238	P01718	IGLV3-27	Immunoglobulin lambda variable 3-27	LV327_HUMAN	4	18.0266	1.18027	Zika	Dengue	NaN	NaN	NaN
Zika / Dengue	P08311	P08311	-0.227244	0.227244	0.216456	0.0878618	116	P08311	CTSG	Cathepsin G	CATG_HUMAN	7	-14.5735	0.854265	Zika	Dengue	NaN	NaN	NaN
Zika / Dengue	Q5VVK9;Q5VVL2;Q9NUP7;Q9NUP7-2	Q5VVK9;Q5VVL2;Q9NUP7;Q9NUP7-2	-0.155929	0.155929	0.21948	0.0890019	54	Q5VVK9;Q5VVL2;Q9NUP7;Q9NUP7-2	TRMT13	tRNA:m(4)X modification enzyme TRM13 homolog;tRNA:m(4)X modification enzyme TRM13 homolog;tRNA:m(4)X modification enzyme TRM13 homolog;Isoform 2 of tRNA:m(4)X modification enzyme TRM13 homolog	Q5VVK9_HUMAN;Q5VVL2_HUMAN;TRM13_HUMAN;TRM13_HUMAN	1	-10.2445	0.897555	Zika	Dengue	NaN	NaN	NaN
Zika / Dengue	Q5T123;Q9H299	Q5T123;Q9H299	-0.299414	0.299414	0.222151	0.0898427	124	Q5T123;Q9H299	SH3BGRL3	SH3 domain-binding glutamic acid-rich-like protein 3	Q5T123_HUMAN;SH3L3_HUMAN	2	-18.7417	0.812583	Zika	Dengue	NaN	NaN	NaN
Zika / Dengue	F5GYZ5;F5H3C5;F5H4R2;P04179;P04179-3;P04179-4	F5GYZ5;F5H3C5;F5H4R2;P04179;P04179-3;P04179-4	-2.85472	2.85472	0.2345	0.0938206	8	F5GYZ5;F5H3C5;F5H4R2;P04179;P04179-3;P04179-4	SOD2	Superoxide dismutase (Fragment);Superoxide dismutase (Fragment);Superoxide dismutase (Fragment);Superoxide dismutase [Mn], mitochondrial;Isoform 3 of Superoxide dismutase [Mn], mitochondrial;Isoform 4 of Superoxide dismutase [Mn], mitochondrial	F5GYZ5_HUMAN;F5H3C5_HUMAN;F5H4R2_HUMAN;SODM_HUMAN;SODM_HUMAN;SODM_HUMAN	1	-86.1757	0.138243	Zika	Dengue	NaN	NaN	NaN
Zika / Dengue	P00748	P00748	-0.013812	0.013812	0.235613	0.0941539	244	P00748	F12	Coagulation factor XII	FA12_HUMAN	32	-0.952804	0.990472	Zika	Dengue	NaN	NaN	NaN
Zika / Dengue	Q68DL7	Q68DL7	-0.0245325	0.0245325	0.238994	0.0951473	224	Q68DL7	C18orf63	Uncharacterized protein C18orf63	CR063_HUMAN	1	-1.68609	0.983139	Zika	Dengue	NaN	NaN	NaN
Zika / Dengue	A0A0A0MS15	A0A0A0MS15	0.157429	0.157429	0.247981	0.0980502	244	A0A0A0MS15	IGHV3-49	Immunoglobulin heavy variable 3-49	HV349_HUMAN	9	11.5298	1.1153	Zika	Dengue	NaN	NaN	NaN
Zika / Dengue	P01344;P01344-3	P01344;P01344-3	-0.0955584	0.0955584	0.252757	0.0997472	242	P01344;P01344-3	IGF2	Insulin-like growth factor II;Isoform 3 of Insulin-like growth factor II	IGF2_HUMAN	5	-6.40901	0.93591	Zika	Dengue	NaN	NaN	NaN
Zika / Dengue	A0A0C4DH39	A0A0C4DH39	-0.151432	0.151432	0.253451	0.0998298	192	A0A0C4DH39	IGHV1-58	Immunoglobulin heavy variable 1-58	HV158_HUMAN	1	-9.96437	0.900356	Zika	Dengue	NaN	NaN	NaN
Zika / Dengue	P62258	P62258	-0.388184	0.388184	0.256294	0.100565	84	P62258	YWHAE	14-3-3 protein epsilon	1433E_HUMAN	6	-23.5909	0.764091	Zika	Dengue	NaN	NaN	NaN
Zika / Dengue	P13796	P13796	-0.0201172	0.0201172	0.258942	0.101411	228	P13796	LCP1	Plastin-2	PLSL_HUMAN	19	-1.38474	0.986153	Zika	Dengue	NaN	NaN	NaN
Zika / Dengue	A0A075B6S9	A0A075B6S9	0.0124569	0.0124569	0.260405	0.101854	230	A0A075B6S9	IGKV1D-37	Immunoglobulin kappa variable 1-37 (non-functional) (Fragment)	A0A075B6S9_HUMAN	1	0.867184	1.00867	Zika	Dengue	NaN	NaN	NaN
Zika / Dengue	A0A075B6S6	A0A075B6S6	0.322317	0.322317	0.266007	0.103197	70	A0A075B6S6	IGKV2D-30	Immunoglobulin kappa variable 2D-30	KVD30_HUMAN	2	25.0337	1.25034	Zika	Dengue	NaN	NaN	NaN
Zika / Dengue	A0A0U1RR20;Q92954;Q92954-3;Q92954-6	A0A0U1RR20;Q92954;Q92954-3;Q92954-6	-0.0728862	0.0728862	0.267129	0.103405	238	A0A0U1RR20;Q92954;Q92954-3;Q92954-6	PRG4	Proteoglycan 4;Proteoglycan 4;Isoform C of Proteoglycan 4;Isoform F of Proteoglycan 4	A0A0U1RR20_HUMAN;PRG4_HUMAN;PRG4_HUMAN;PRG4_HUMAN	18	-4.92659	0.950734	Zika	Dengue	NaN	NaN	NaN
Zika / Dengue	P09960;P09960-2	P09960;P09960-2	-0.812225	0.812225	0.267296	0.103405	12	P09960;P09960-2	LTA4H	Leukotriene A-4 hydrolase;Isoform 2 of Leukotriene A-4 hydrolase	LKHA4_HUMAN	4	-43.0497	0.569503	Zika	Dengue	NaN	NaN	NaN
Zika / Dengue	A0A075B6I7	A0A075B6I7	0.462236	0.462236	0.286209	0.110204	34	A0A075B6I7	IGLV5-48	Immunoglobulin lambda variable 5-48 (non-functional)	A0A075B6I7_HUMAN	1	37.7675	1.37767	Zika	Dengue	NaN	NaN	NaN
Zika / Dengue	P15169	P15169	-0.000848772	0.000848772	0.288635	0.11093	244	P15169	CPN1	Carboxypeptidase N catalytic chain	CBPN_HUMAN	17	-0.0588151	0.999412	Zika	Dengue	NaN	NaN	NaN
Zika / Dengue	G3V2W1;Q9UK55	G3V2W1;Q9UK55	-0.124174	0.124174	0.295151	0.113118	240	G3V2W1;Q9UK55	SERPINA10	Protein Z-dependent protease inhibitor	G3V2W1_HUMAN;ZPI_HUMAN	26	-8.24705	0.91753	Zika	Dengue	NaN	NaN	NaN
Zika / Dengue	A0A286YEY5;P01877	A0A286YEY5;P01877	-0.0903127	0.0903127	0.295519	0.113154	238	A0A286YEY5;P01877	IGHA2	Immunoglobulin heavy constant alpha 2 (Fragment);Immunoglobulin heavy constant alpha 2	A0A286YEY5_HUMAN;IGHA2_HUMAN	5	-6.06809	0.939319	Zika	Dengue	NaN	NaN	NaN
Zika / Dengue	Q15485	Q15485	-0.0791892	0.0791892	0.298836	0.113895	202	Q15485	FCN2	Ficolin-2	FCN2_HUMAN	10	-5.34105	0.946589	Zika	Dengue	NaN	NaN	NaN
Zika / Dengue	A0A075B6J9	A0A075B6J9	-0.0401214	0.0401214	0.302109	0.114824	244	A0A075B6J9	IGLV2-18	Immunoglobulin lambda variable 2-18	LV218_HUMAN	3	-2.74269	0.972573	Zika	Dengue	NaN	NaN	NaN
Zika / Dengue	A0A0J9YXX1	A0A0J9YXX1	0.677176	0.677176	0.305657	0.115878	186	A0A0J9YXX1	IGHV5-10-1	Immunoglobulin heavy variable 5-10-1	HV5X1_HUMAN	3	59.9007	1.59901	Zika	Dengue	NaN	NaN	NaN
Zika / Dengue	Q15113	Q15113	-0.122215	0.122215	0.305726	0.115878	96	Q15113	PCOLCE	Procollagen C-endopeptidase enhancer 1	PCOC1_HUMAN	9	-8.12239	0.918776	Zika	Dengue	NaN	NaN	NaN
Zika / Dengue	P69891;P69892	P69891;P69892	-0.335461	0.335461	0.311607	0.117782	134	P69891;P69892	HBG1;HBG2	Hemoglobin subunit gamma-1;Hemoglobin subunit gamma-2	HBG1_HUMAN;HBG2_HUMAN	3	-20.7469	0.792531	Zika	Dengue	NaN	NaN	NaN
Zika / Dengue	P02790	P02790	0.0458263	0.0458263	0.315013	0.118517	244	P02790	HPX	Hemopexin	HEMO_HUMAN	50	3.22742	1.03227	Zika	Dengue	NaN	NaN	NaN
Zika / Dengue	P06702	P06702	-0.575848	0.575848	0.314764	0.118517	162	P06702	S100A9	Protein S100-A9	S10A9_HUMAN	9	-32.9108	0.670892	Zika	Dengue	NaN	NaN	NaN
Zika / Dengue	P15144	P15144	0.365272	0.365272	0.314349	0.118517	70	P15144	ANPEP	Aminopeptidase N	AMPN_HUMAN	10	28.8125	1.28812	Zika	Dengue	NaN	NaN	NaN
Zika / Dengue	P02730	P02730	0.307218	0.307218	0.315419	0.118517	50	P02730	SLC4A1	Band 3 anion transport protein	B3AT_HUMAN	7	23.732	1.23732	Zika	Dengue	NaN	NaN	NaN
Zika / Dengue	A0A075B6S5	A0A075B6S5	-0.403096	0.403096	0.323406	0.120726	178	A0A075B6S5	IGKV1-27	Immunoglobulin kappa variable 1-27	KV127_HUMAN	4	-24.3767	0.756233	Zika	Dengue	NaN	NaN	NaN
Zika / Dengue	Q9NZP8	Q9NZP8	0.0781525	0.0781525	0.329262	0.122213	244	Q9NZP8	C1RL	Complement C1r subcomponent-like protein	C1RL_HUMAN	13	5.56653	1.05567	Zika	Dengue	NaN	NaN	NaN
Zika / Dengue	A0A0C4DH25	A0A0C4DH25	0.139457	0.139457	0.347168	0.127708	244	A0A0C4DH25	IGKV3D-20	Immunoglobulin kappa variable 3D-20	KVD20_HUMAN	2	10.1491	1.10149	Zika	Dengue	NaN	NaN	NaN
Zika / Dengue	A0A0A0MRZ9	A0A0A0MRZ9	-1.05561	1.05561	0.352033	0.129265	28	A0A0A0MRZ9	IGLV5-52	Immunoglobulin lambda variable 5-52	LV552_HUMAN	2	-51.8908	0.481092	Zika	Dengue	NaN	NaN	NaN
Zika / Dengue	K7EL47;K7EQZ5;Q16853;Q16853-3	K7EL47;K7EQZ5;Q16853;Q16853-3	0.115492	0.115492	0.353445	0.129537	80	K7EL47;K7EQZ5;Q16853;Q16853-3	AOC3	Amine oxidase (Fragment);Amine oxidase (Fragment);Membrane primary amine oxidase;Isoform 3 of Membrane primary amine oxidase	K7EL47_HUMAN;K7EQZ5_HUMAN;AOC3_HUMAN;AOC3_HUMAN	1	8.33442	1.08334	Zika	Dengue	NaN	NaN	NaN
Zika / Dengue	P11597;P11597-2	P11597;P11597-2	0.436778	0.436778	0.358095	0.13091	134	P11597;P11597-2	CETP	Cholesteryl ester transfer protein;Isoform 2 of Cholesteryl ester transfer protein	CETP_HUMAN	4	35.3578	1.35358	Zika	Dengue	NaN	NaN	NaN
Zika / Dengue	P08519	P08519	-0.0942924	0.0942924	0.364255	0.132808	244	P08519	LPA	Apolipoprotein(a)	APOA_HUMAN	47	-6.32684	0.936732	Zika	Dengue	NaN	NaN	NaN
Zika / Dengue	P00739	P00739	0.169634	0.169634	0.366487	0.133504	244	P00739	HPR	Haptoglobin-related protein	HPTR_HUMAN	18	12.4773	1.12477	Zika	Dengue	NaN	NaN	NaN
Zika / Dengue	P55058	P55058	0.0391441	0.0391441	0.385783	0.139791	230	P55058	PLTP	Phospholipid transfer protein	PLTP_HUMAN	13	2.75041	1.0275	Zika	Dengue	NaN	NaN	NaN
Zika / Dengue	A0A075B6K5	A0A075B6K5	0.0876079	0.0876079	0.386342	0.139871	244	A0A075B6K5	IGLV3-9	Immunoglobulin lambda variable 3-9	LV39_HUMAN	5	6.26069	1.06261	Zika	Dengue	NaN	NaN	NaN
Zika / Dengue	P02760	P02760	-0.0706624	0.0706624	0.389448	0.140792	244	P02760	AMBP	Protein AMBP	AMBP_HUMAN	31	-4.77993	0.952201	Zika	Dengue	NaN	NaN	NaN
Zika / Dengue	A0A087WTE4;A0A087WTF6;A0A087WV75;A0A087WWD4;A0A087WX77;H7BYX6;P13591;P13591-1;P13591-3;P13591-4	A0A087WTE4;A0A087WTF6;A0A087WV75;A0A087WWD4;A0A087WX77;H7BYX6;P13591;P13591-1;P13591-3;P13591-4	0.129451	0.129451	0.390173	0.140886	64	A0A087WTE4;A0A087WTF6;A0A087WV75;A0A087WWD4;A0A087WX77;H7BYX6;P13591;P13591-1;P13591-3;P13591-4	NCAM1	Neural cell adhesion molecule 1;Neural cell adhesion molecule 1;Neural cell adhesion molecule 1;Neural cell adhesion molecule 1;Neural cell adhesion molecule 1;Neural cell adhesion molecule 1;Neural cell adhesion molecule 1;Isoform 2 of Neural cell adhesion molecule 1;Isoform 3 of Neural cell adhesion molecule 1;Isoform 4 of Neural cell adhesion molecule 1	A0A087WTE4_HUMAN;A0A087WTF6_HUMAN;A0A087WV75_HUMAN;A0A087WWD4_HUMAN;A0A087WX77_HUMAN;H7BYX6_HUMAN;NCAM1_HUMAN;NCAM1_HUMAN;NCAM1_HUMAN;NCAM1_HUMAN	13	9.38771	1.09388	Zika	Dengue	NaN	NaN	NaN
Zika / Dengue	P01717	P01717	-0.180494	0.180494	0.390827	0.140999	226	P01717	IGLV3-25	Immunoglobulin lambda variable 3-25	LV325_HUMAN	2	-11.7599	0.882401	Zika	Dengue	NaN	NaN	NaN
Zika / Dengue	Q5T7N2	Q5T7N2	-0.00997788	0.00997788	0.395935	0.142343	244	Q5T7N2	L1TD1	LINE-1 type transposase domain-containing protein 1	LITD1_HUMAN	1	-0.689228	0.993108	Zika	Dengue	NaN	NaN	NaN
Zika / Dengue	P01861	P01861	0.0463377	0.0463377	0.40142	0.143813	244	P01861	IGHG4	Immunoglobulin heavy constant gamma 4	IGHG4_HUMAN	24	3.26402	1.03264	Zika	Dengue	NaN	NaN	NaN
Zika / Dengue	P62328	P62328	0.289595	0.289595	0.402077	0.143923	94	P62328	TMSB4X	Thymosin beta-4	TYB4_HUMAN	3	22.2297	1.2223	Zika	Dengue	NaN	NaN	NaN
Zika / Dengue	P01709	P01709	0.125952	0.125952	0.41356	0.147521	242	P01709	IGLV2-8	Immunoglobulin lambda variable 2-8	LV208_HUMAN	2	9.12273	1.09123	Zika	Dengue	NaN	NaN	NaN
Zika / Dengue	P14151;P14151-2	P14151;P14151-2	0.00914917	0.00914917	0.41593	0.14811	230	P14151;P14151-2	SELL	L-selectin;Isoform 2 of L-selectin	LYAM1_HUMAN	10	0.636187	1.00636	Zika	Dengue	NaN	NaN	NaN
Zika / Dengue	P01031	P01031	0.0635023	0.0635023	0.420123	0.149474	244	P01031	C5	Complement C5	CO5_HUMAN	116	4.49995	1.045	Zika	Dengue	NaN	NaN	NaN
Zika / Dengue	P01591	P01591	-0.105599	0.105599	0.422388	0.15015	244	P01591	JCHAIN	Immunoglobulin J chain	IGJ_HUMAN	16	-7.05808	0.929419	Zika	Dengue	NaN	NaN	NaN
Zika / Dengue	P01019	P01019	-0.0386868	0.0386868	0.429223	0.152317	244	P01019	AGT	Angiotensinogen	ANGT_HUMAN	22	-2.64593	0.973541	Zika	Dengue	NaN	NaN	NaN
Zika / Dengue	D6RF35	D6RF35	0.123441	0.123441	0.433566	0.153408	222	D6RF35	GC	Vitamin D-binding protein	D6RF35_HUMAN	3	8.93302	1.08933	Zika	Dengue	NaN	NaN	NaN
Zika / Dengue	Q01518;Q5T0R1;Q5T0R2;Q5T0R3;Q5T0R4;Q5T0R5;Q5T0R6;Q5T0R7	Q01518;Q5T0R1;Q5T0R2;Q5T0R3;Q5T0R4;Q5T0R5;Q5T0R6;Q5T0R7	0.269241	0.269241	0.433145	0.153408	70	Q01518;Q5T0R1;Q5T0R2;Q5T0R3;Q5T0R4;Q5T0R5;Q5T0R6;Q5T0R7	CAP1	Adenylyl cyclase-associated protein 1;Adenylyl cyclase-associated protein 1 (Fragment);Adenylyl cyclase-associated protein 1 (Fragment);Adenylyl cyclase-associated protein 1 (Fragment);Adenylyl cyclase-associated protein 1 (Fragment);Adenylyl cyclase-associated protein 1 (Fragment);Adenylyl cyclase-associated protein 1 (Fragment);Adenylyl cyclase-associated protein 1 (Fragment)	CAP1_HUMAN;Q5T0R1_HUMAN;Q5T0R2_HUMAN;Q5T0R3_HUMAN;Q5T0R4_HUMAN;Q5T0R5_HUMAN;Q5T0R6_HUMAN;Q5T0R7_HUMAN	2	20.5174	1.20517	Zika	Dengue	NaN	NaN	NaN
Zika / Dengue	A0A0B4J1Y8	A0A0B4J1Y8	0.185781	0.185781	0.44194	0.155623	194	A0A0B4J1Y8	IGLV9-49	Immunoglobulin lambda variable 9-49	LV949_HUMAN	7	13.7433	1.13743	Zika	Dengue	NaN	NaN	NaN
Zika / Dengue	P22891;P22891-2	P22891;P22891-2	0.0747745	0.0747745	0.447304	0.157243	222	P22891;P22891-2	PROZ	Vitamin K-dependent protein Z;Isoform 2 of Vitamin K-dependent protein Z	PROZ_HUMAN	10	5.31964	1.0532	Zika	Dengue	NaN	NaN	NaN
Zika / Dengue	A0A087WSX0	A0A087WSX0	-0.0794093	0.0794093	0.451446	0.158294	170	A0A087WSX0	IGLV5-45	Immunoglobulin lambda variable 5-45	LV545_HUMAN	1	-5.35549	0.946445	Zika	Dengue	NaN	NaN	NaN
Zika / Dengue	P00734	P00734	-0.0196258	0.0196258	0.456157	0.159674	244	P00734	F2	Prothrombin	THRB_HUMAN	39	-1.35115	0.986489	Zika	Dengue	NaN	NaN	NaN
Zika / Dengue	P14625	P14625	-0.296804	0.296804	0.467526	0.1631	78	P14625	HSP90B1	Endoplasmin	ENPL_HUMAN	9	-18.5946	0.814054	Zika	Dengue	NaN	NaN	NaN
Zika / Dengue	C9JF17;P05090	C9JF17;P05090	0.0485691	0.0485691	0.469303	0.163581	244	C9JF17;P05090	APOD	Apolipoprotein D (Fragment);Apolipoprotein D	C9JF17_HUMAN;APOD_HUMAN	14	3.42387	1.03424	Zika	Dengue	NaN	NaN	NaN
Zika / Dengue	P07900;P07900-2	P07900;P07900-2	2.62387	2.62387	0.473665	0.164823	16	P07900;P07900-2	HSP90AA1	Heat shock protein HSP 90-alpha;Isoform 2 of Heat shock protein HSP 90-alpha	HS90A_HUMAN	9	516.402	6.16402	Zika	Dengue	NaN	NaN	NaN
Zika / Dengue	Q03591	Q03591	-0.0594823	0.0594823	0.486041	0.168142	244	Q03591	CFHR1	Complement factor H-related protein 1	FHR1_HUMAN	9	-4.03916	0.959608	Zika	Dengue	NaN	NaN	NaN
Zika / Dengue	P08294	P08294	0.154693	0.154693	0.486062	0.168142	138	P08294	SOD3	Extracellular superoxide dismutase [Cu-Zn]	SODE_HUMAN	5	11.3185	1.11318	Zika	Dengue	NaN	NaN	NaN
Zika / Dengue	A0A0A0MT69	A0A0A0MT69	0.146678	0.146678	0.491808	0.169683	240	A0A0A0MT69	IGKJ4	Immunoglobulin kappa joining 4 (Fragment)	A0A0A0MT69_HUMAN	1	10.7017	1.10702	Zika	Dengue	NaN	NaN	NaN
Zika / Dengue	P07357	P07357	-0.0273102	0.0273102	0.491415	0.169683	244	P07357	C8A	Complement component C8 alpha chain	CO8A_HUMAN	39	-1.87519	0.981248	Zika	Dengue	NaN	NaN	NaN
Zika / Dengue	P04040	P04040	-0.198222	0.198222	0.494582	0.170374	122	P04040	CAT	Catalase	CATA_HUMAN	15	-12.8376	0.871624	Zika	Dengue	NaN	NaN	NaN
Zika / Dengue	E7END6;P04070;P04070-2	E7END6;P04070;P04070-2	0.0465083	0.0465083	0.495799	0.170508	234	E7END6;P04070;P04070-2	PROC	Vitamin K-dependent protein C;Vitamin K-dependent protein C;Isoform 2 of Vitamin K-dependent protein C	E7END6_HUMAN;PROC_HUMAN;PROC_HUMAN	11	3.27623	1.03276	Zika	Dengue	NaN	NaN	NaN
Zika / Dengue	P01715	P01715	-0.24991	0.24991	0.496657	0.170519	150	P01715	IGLV3-1	Immunoglobulin lambda variable 3-1	LV301_HUMAN	2	-15.9051	0.840949	Zika	Dengue	NaN	NaN	NaN
Zika / Dengue	P00441	P00441	-0.320015	0.320015	0.496588	0.170519	48	P00441	SOD1	Superoxide dismutase [Cu-Zn]	SODC_HUMAN	5	-19.8938	0.801062	Zika	Dengue	NaN	NaN	NaN
Zika / Dengue	A0A286YES5;P01854	A0A286YES5;P01854	-0.301933	0.301933	0.514183	0.17595	86	A0A286YES5;P01854	IGHE	Immunoglobulin heavy constant epsilon (Fragment);Immunoglobulin heavy constant epsilon	A0A286YES5_HUMAN;IGHE_HUMAN	9	-18.8835	0.811165	Zika	Dengue	NaN	NaN	NaN
Zika / Dengue	P02747	P02747	-0.0052666	0.0052666	0.526672	0.179338	244	P02747	C1QC	Complement C1q subcomponent subunit C	C1QC_HUMAN	10	-0.364387	0.996356	Zika	Dengue	NaN	NaN	NaN
Zika / Dengue	A0A0U1RR32;A0A0U1RRH7;P0C0S8;P20671;Q16777;Q6FI13;Q96KK5;Q99878;Q9BTM1	A0A0U1RR32;A0A0U1RRH7;P0C0S8;P20671;Q16777;Q6FI13;Q96KK5;Q99878;Q9BTM1	-0.104454	0.104454	0.542131	0.18308	142	A0A0U1RR32;A0A0U1RRH7;P0C0S8;P20671;Q16777;Q6FI13;Q96KK5;Q99878;Q9BTM1	HIST1H3D;HIST1H3D;HIST1H2AG;HIST1H2AD;HIST2H2AC;HIST2H2AA3;HIST1H2AH;HIST1H2AJ;H2AFJ	Histone H2A;Histone H2A;Histone H2A type 1;Histone H2A type 1-D;Histone H2A type 2-C;Histone H2A type 2-A;Histone H2A type 1-H;Histone H2A type 1-J;Histone H2A.J	A0A0U1RR32_HUMAN;A0A0U1RRH7_HUMAN;H2A1_HUMAN;H2A1D_HUMAN;H2A2C_HUMAN;H2A2A_HUMAN;H2A1H_HUMAN;H2A1J_HUMAN;H2AJ_HUMAN	3	-6.98428	0.930157	Zika	Dengue	NaN	NaN	NaN
Zika / Dengue	P05543	P05543	0.0193921	0.0193921	0.549188	0.184844	244	P05543	SERPINA7	Thyroxine-binding globulin	THBG_HUMAN	20	1.35324	1.01353	Zika	Dengue	NaN	NaN	NaN
Zika / Dengue	A0A087X0M8;O00533;O00533-2	A0A087X0M8;O00533;O00533-2	0.0528143	0.0528143	0.550046	0.184844	214	A0A087X0M8;O00533;O00533-2	CHL1	Neural cell adhesion molecule L1-like protein;Neural cell adhesion molecule L1-like protein;Isoform 2 of Neural cell adhesion molecule L1-like protein	A0A087X0M8_HUMAN;NCHL1_HUMAN;NCHL1_HUMAN	8	3.72864	1.03729	Zika	Dengue	NaN	NaN	NaN
Zika / Dengue	E7ESV4;F5H7Y6;P61224;P61224-3;P61224-4	E7ESV4;F5H7Y6;P61224;P61224-3;P61224-4	0.0296413	0.0296413	0.555726	0.186601	40	E7ESV4;F5H7Y6;P61224;P61224-3;P61224-4	RAP1B	Ras-related protein Rap-1b (Fragment);Ras-related protein Rap-1b;Ras-related protein Rap-1b;Isoform 3 of Ras-related protein Rap-1b;Isoform 4 of Ras-related protein Rap-1b	E7ESV4_HUMAN;F5H7Y6_HUMAN;RAP1B_HUMAN;RAP1B_HUMAN;RAP1B_HUMAN	3	2.07583	1.02076	Zika	Dengue	NaN	NaN	NaN
Zika / Dengue	A0A0A0MRJ7;P12259	A0A0A0MRJ7;P12259	0.0425493	0.0425493	0.573393	0.191907	244	A0A0A0MRJ7;P12259	F5	Coagulation factor V	A0A0A0MRJ7_HUMAN;FA5_HUMAN	56	2.99321	1.02993	Zika	Dengue	NaN	NaN	NaN
Zika / Dengue	A0A0J9YY99	A0A0J9YY99	0.0157641	0.0157641	0.573887	0.191917	244	A0A0J9YY99	NaN	Uncharacterized protein (Fragment)	A0A0J9YY99_HUMAN	7	1.09868	1.01099	Zika	Dengue	NaN	NaN	NaN
Zika / Dengue	P02763	P02763	-0.0316811	0.0316811	0.580493	0.193968	244	P02763	ORM1	Alpha-1-acid glycoprotein 1	A1AG1_HUMAN	14	-2.17203	0.97828	Zika	Dengue	NaN	NaN	NaN
Zika / Dengue	Q13228;Q13228-4	Q13228;Q13228-4	-0.219515	0.219515	0.583206	0.194288	16	Q13228;Q13228-4	SELENBP1	Selenium-binding protein 1;Isoform 4 of Selenium-binding protein 1	SBP1_HUMAN	5	-14.1146	0.858854	Zika	Dengue	NaN	NaN	NaN
Zika / Dengue	P02765	P02765	0.0222724	0.0222724	0.589034	0.195615	244	P02765	AHSG	Alpha-2-HS-glycoprotein	FETUA_HUMAN	23	1.55579	1.01556	Zika	Dengue	NaN	NaN	NaN
Zika / Dengue	P01024	P01024	0.0304025	0.0304025	0.592702	0.196297	244	P01024	C3	Complement C3	CO3_HUMAN	233	2.1297	1.0213	Zika	Dengue	NaN	NaN	NaN
Zika / Dengue	K7ERG9;P00746	K7ERG9;P00746	-0.0477379	0.0477379	0.592568	0.196297	240	K7ERG9;P00746	CFD	Complement factor D	K7ERG9_HUMAN;CFAD_HUMAN	10	-3.25479	0.967452	Zika	Dengue	NaN	NaN	NaN
Zika / Dengue	P68032;P68133	P68032;P68133	0.0898574	0.0898574	0.599093	0.197646	90	P68032;P68133	ACTC1;ACTA1	Actin, alpha cardiac muscle 1;Actin, alpha skeletal muscle	ACTC_HUMAN;ACTS_HUMAN	3	6.4265	1.06426	Zika	Dengue	NaN	NaN	NaN
Zika / Dengue	E7ERL0;J3KPD9;O60361;P15531;P15531-2;P22392;P22392-2;Q32Q12	E7ERL0;J3KPD9;O60361;P15531;P15531-2;P22392;P22392-2;Q32Q12	0.000400912	0.000400912	0.598543	0.197646	32	E7ERL0;J3KPD9;O60361;P15531;P15531-2;P22392;P22392-2;Q32Q12	NME1;NME1-NME2;NME2P1;NME1;NME1;NME2;NME2;NME1-NME2	Nucleoside diphosphate kinase A;NME1-NME2 readthrough;Putative nucleoside diphosphate kinase;Nucleoside diphosphate kinase A;Isoform 2 of Nucleoside diphosphate kinase A;Nucleoside diphosphate kinase B;Isoform 3 of Nucleoside diphosphate kinase B;Nucleoside diphosphate kinase	E7ERL0_HUMAN;J3KPD9_HUMAN;NDK8_HUMAN;NDKA_HUMAN;NDKA_HUMAN;NDKB_HUMAN;NDKB_HUMAN;Q32Q12_HUMAN	1	0.027793	1.00028	Zika	Dengue	NaN	NaN	NaN
Zika / Dengue	P40197	P40197	-0.0823701	0.0823701	0.601863	0.198216	120	P40197	GP5	Platelet glycoprotein V	GPV_HUMAN	9	-5.54953	0.944505	Zika	Dengue	NaN	NaN	NaN
Zika / Dengue	P60174;P60174-1;P60174-4	P60174;P60174-1;P60174-4	0.045802	0.045802	0.607935	0.200055	58	P60174;P60174-1;P60174-4	TPI1	Triosephosphate isomerase;Isoform 2 of Triosephosphate isomerase;Isoform 4 of Triosephosphate isomerase	TPIS_HUMAN	4	3.22568	1.03226	Zika	Dengue	NaN	NaN	NaN
Zika / Dengue	P31146	P31146	-0.45618	0.45618	0.612575	0.200461	48	P31146	CORO1A	Coronin-1A	COR1A_HUMAN	12	-27.1086	0.728914	Zika	Dengue	NaN	NaN	NaN
Zika / Dengue	Q04756	Q04756	-0.0534082	0.0534082	0.628926	0.205323	244	Q04756	HGFAC	Hepatocyte growth factor activator	HGFA_HUMAN	25	-3.63429	0.963657	Zika	Dengue	NaN	NaN	NaN
Zika / Dengue	P01782	P01782	0.0224419	0.0224419	0.639001	0.208282	244	P01782	IGHV3-9	Immunoglobulin heavy variable 3-9	HV309_HUMAN	9	1.56772	1.01568	Zika	Dengue	NaN	NaN	NaN
Zika / Dengue	F5H8B0;P08709;P08709-2	F5H8B0;P08709;P08709-2	-0.248796	0.248796	0.640409	0.208576	190	F5H8B0;P08709;P08709-2	F7	Coagulation factor VII;Coagulation factor VII;Isoform B of Coagulation factor VII	F5H8B0_HUMAN;FA7_HUMAN;FA7_HUMAN	4	-15.8401	0.841599	Zika	Dengue	NaN	NaN	NaN
Zika / Dengue	D6R934;P02746	D6R934;P02746	0.0414949	0.0414949	0.643292	0.209349	244	D6R934;P02746	C1QB	Complement C1q subcomponent subunit B	D6R934_HUMAN;C1QB_HUMAN	13	2.91797	1.02918	Zika	Dengue	NaN	NaN	NaN
Zika / Dengue	J3KRP0	J3KRP0	0.00612774	0.00612774	0.662293	0.214375	128	J3KRP0	CNDP1	Beta-Ala-His dipeptidase	J3KRP0_HUMAN	1	0.425646	1.00426	Zika	Dengue	NaN	NaN	NaN
Zika / Dengue	I3L3H7;P02452	I3L3H7;P02452	-0.0301125	0.0301125	0.662377	0.214375	36	I3L3H7;P02452	COL1A1	Collagen alpha-1(I) chain (Fragment);Collagen alpha-1(I) chain	I3L3H7_HUMAN;CO1A1_HUMAN	3	-2.06561	0.979344	Zika	Dengue	NaN	NaN	NaN
Zika / Dengue	A0A0B4J1Y9	A0A0B4J1Y9	-0.0647615	0.0647615	0.6644	0.214861	244	A0A0B4J1Y9	IGHV3-72	Immunoglobulin heavy variable 3-72	HV372_HUMAN	11	-4.38966	0.956103	Zika	Dengue	NaN	NaN	NaN
[truncated: 53 more rows]
